# Supplementary material for: Transposable elements and their KZFP controllers are drivers of transcriptional innovation in the developing human brain
Source: HighWire-hosted journal article supplement (doi:10.1101/gr.275133.120), 2021-08-16
Supplement: Supplemental_Code.zip [file metadata.xls]

bams	samples	groups
/path/bam1	s1	C
/path/bam2	s2	C
/path/bam3	s3	KO
/path/bam4	s4	KO
