# Supplementary material for: Transposable elements and their KZFP controllers are drivers of transcriptional innovation in the developing human brain
Source: HighWire-hosted journal article supplement (doi:10.1101/gr.275133.120), 2021-08-16
Supplement: Supplemental_Table_S1.xlsx [file Supplemental_Table_S1.xlsx]

## Sheet: Legend
Supplemental Table S1 – Gene expression values in counts per million (CPM) from Brainspan (BS) for all brain regions excluding DFC and CB (see Supplemental Table S2).

## Sheet: cpm_Amygdala.xls
ensembl	entrez	symbol	genename	mean.2A	mean.2B	mean.3A	mean.3B	mean.4	mean.5	mean.6	mean.7	mean.8	mean.9	mean.10	mean.11
ENSG00000000003	7105	TSPAN6	tetraspanin 6	70.7778	66.1476	47.8972	41.4268	51.9046	69.8554	33.1452	19.7399	28.1414	19.1012	13.7964	14.3245
ENSG00000000005	64102	TNMD	tenomodulin	0	0	0	0	0	0	0.544223	0	0	0	0	0
ENSG00000000419	8813	DPM1	dolichyl-phosphate mannosyltransferase subunit 1, catalytic	22.8226	21.9997	17.9082	20.4809	16.3391	12.5317	12.2372	13.8274	23.5854	14.1815	14.9516	15.7154
ENSG00000000457	57147	SCYL3	SCY1 like pseudokinase 3	8.73769	11.4954	10.4581	12.1783	12.6545	6.17171	6.99241	6.9614	5.41715	7.45682	7.0454	7.53437
ENSG00000000460	55732	C1orf112	chromosome 1 open reading frame 112	10.9744	6.5676	6.30799	8.25091	4.35563	1.82013	1.57958	1.04898	1.47235	0	1.64514	1.46791
ENSG00000000938	2268	FGR	FGR proto-oncogene, Src family tyrosine kinase	0.631361	0.91672	0.745334	1.2919	1.72395	19.603	5.21221	2.65105	4.75042	2.60994	2.96202	4.7726
ENSG00000000971	3075	CFH	complement factor H	4.38086	1.70151	1.45448	1.39525	8.31088	28.5573	14.0052	5.74077	3.80589	5.56511	5.86624	10.7193
ENSG00000001036	2519	FUCA2	alpha-L-fucosidase 2	17.0067	16.3661	13.155	10.2146	14.4205	18.9754	17.3599	15.3532	27.2524	20.955	18.8829	19.0567
ENSG00000001084	2729	GCLC	glutamate-cysteine ligase catalytic subunit	17.593	17.8573	17.2924	13.074	17.7019	30.3983	27.0362	42.5885	36.3088	63.2765	52.6613	51.7723
ENSG00000001167	4800	NFYA	nuclear transcription factor Y subunit alpha	111.362	88.9879	108.218	68.0915	57.345	23.0341	25.1851	25.9574	13.529	28.3264	31.2605	27.1349
ENSG00000001460	90529	STPG1	sperm tail PG-rich repeat containing 1	7.39054	9.56438	6.61988	4.59915	4.7234	13.1175	15.0692	23.4399	12.9178	19.6	22.3515	18.6285
ENSG00000001461	57185	NIPAL3	NIPA like domain containing 3	29.3734	23.4696	21.3292	18.5516	22.5118	28.5991	59.0266	165.796	85.3687	237.935	215.853	202.207
ENSG00000001497	81887	LAS1L	LAS1 like, ribosome biogenesis factor	40.1347	30.3118	36.7972	51.5553	32.9375	24.373	22.178	17.9852	18.7517	20.8559	23.5573	28.9521
ENSG00000001561	22875	ENPP4	ectonucleotide pyrophosphatase/phosphodiesterase 4	12.2388	13.8026	10.8878	11.7993	13.0899	16.0883	19.3909	52.201	34.4197	61.4269	59.4563	53.5824
ENSG00000001617	6405	SEMA3F	semaphorin 3F	35.293	36.0167	41.6634	27.8877	31.6501	42.3652	16.6021	4.78716	4.02814	6.08748	3.5302	5.56575
ENSG00000001626	1080	CFTR	cystic fibrosis transmembrane conductance regulator	0	0	0	0	0	0	0.496771	0.705676	0.416704	1.06876	1.18183	1.56101
ENSG00000001629	54467	ANKIB1	ankyrin repeat and IBR domain containing 1	68.8842	89.6226	90.2515	93.9639	120.068	71.6546	72.3486	91.757	49.3099	101.96	99.255	88.5508
ENSG00000001630	1595	CYP51A1	cytochrome P450 family 51 subfamily A member 1	18.3936	8.17369	16.6741	9.31888	14.3044	4.41434	5.95164	9.74596	1.13899	6.51212	3.39368	4.2347
ENSG00000001631	889	KRIT1	KRIT1 ankyrin repeat containing	25.2151	19.9456	26.3014	26.2686	24.8904	17.5109	15.5314	20.0069	7.41733	18.1129	22.1356	19.2786
ENSG00000002016	5893	RAD52	RAD52 homolog, DNA repair protein	3.31409	5.19176	6.5463	12.9362	6.30053	10.5651	5.03966	3.98612	2.08352	2.87346	6.34996	5.08963
ENSG00000002079	---	---	---	0	0	0	0	0	1.15066	0	0	0	0.423577	0	0
ENSG00000002330	572	BAD	BCL2 associated agonist of cell death	20.9122	26.5335	18.0701	19.4473	19.914	54.5412	45.436	41.5205	76.9791	31.6101	24.1993	34.2078
ENSG00000002549	51056	LAP3	leucine aminopeptidase 3	20.933	21.3935	22.6128	19.4129	29.6414	55.7546	37.0625	37.172	46.7542	43.7612	42.3216	46.4756
ENSG00000002587	9957	HS3ST1	heparan sulfate-glucosamine 3-sulfotransferase 1	5.08678	12.3261	15.6587	11.2481	23.9943	3.03355	9.73534	13.1408	12.0844	11.7439	9.3635	6.97798
ENSG00000002745	51384	WNT16	Wnt family member 16	0.847469	0.530636	0.547466	0.499533	2.9055	0.523027	2.92501	2.42219	1.52791	1.94368	0.52484	1.0523
ENSG00000002746	23072	HECW1	HECT, C2 and WW domain containing E3 ubiquitin protein ligase 1	69.633	77.491	96.6153	68.6427	91.8387	9.30987	31.7179	65.132	23.3076	45.4403	40.5924	36.8175
ENSG00000002822	8379	MAD1L1	mitotic arrest deficient 1 like 1	47.4534	38.1985	46.1989	43.8728	37.0451	21.2349	27.961	25.5379	18.0294	18.2753	22.6789	22.7513
ENSG00000002834	3927	LASP1	LIM and SH3 protein 1	410.595	347.977	359.943	268.353	339.185	292.874	226.61	207.145	91.7026	182.123	160.772	144.178
ENSG00000002919	29916	SNX11	sorting nexin 11	19.9829	23.4203	17.0026	16.1401	19.7307	33.2854	24.9896	32.175	59.3108	37.7941	29.9508	35.4279
ENSG00000002933	55365	TMEM176A	transmembrane protein 176A	0	0	0.474506	0	0	12.1133	2.17586	4.86345	22.4187	16.7958	13.1248	17.8782
ENSG00000003056	4074	M6PR	mannose-6-phosphate receptor, cation dependent	21.7655	22.1279	21.0229	21.6522	26.6953	27.5949	25.0887	40.6813	20.1962	46.9529	35.6759	38.7384
ENSG00000003096	90293	KLHL13	kelch like family member 13	106.4	101.184	65.3946	43.1838	38.3194	22.4901	27.568	30.1152	20.863	28.6518	21.2221	20.4918
ENSG00000003137	56603	CYP26B1	cytochrome P450 family 26 subfamily B member 1	29.174	44.7327	48.7785	12.6261	10.8259	37.4696	50.6522	164.766	55.6994	195.498	169.241	46.4387
ENSG00000003147	3382	ICA1	islet cell autoantigen 1	6.47739	12.1657	13.8481	13.0395	11.7175	18.6825	26.3596	28.6657	28.9192	21.5417	30.3779	27.1251
ENSG00000003249	79007	DBNDD1	dysbindin domain containing 1	56.5025	68.7371	59.629	51.5897	72.8888	57.3028	72.4084	71.8836	76.7568	82.2175	79.4967	78.9174
ENSG00000003393	57679	ALS2	alsin Rho guanine nucleotide exchange factor ALS2	71.5915	60.4615	72.2151	62.5105	63.0625	31.9465	40.5749	68.2217	21.6964	39.5784	53.8978	43.1746
ENSG00000003400	843	CASP10	caspase 10	1.55904	1.02001	0.904257	0.809588	1.91828	11.9041	4.08805	2.72734	2.528	1.28822	1.61388	2.32669
ENSG00000003402	8837	CFLAR	CASP8 and FADD like apoptosis regulator	10.2842	8.86047	12.5276	15.5544	12.54	32.5741	17.791	17.146	9.36194	12.5765	16.3907	15.6362
ENSG00000003436	7035	TFPI	tissue factor pathway inhibitor	15.5983	34.1541	18.644	21.8244	50.8887	46.5075	8.28794	2.49848	1.58347	1.66357	1.71725	1.59763
ENSG00000003509	55471	NDUFAF7	NADH:ubiquinone oxidoreductase complex assembly factor 7	10.0471	7.79195	8.41867	13.2807	7.72846	10.2722	7.79559	10.8522	9.91755	10.3894	10.6094	10.1497
ENSG00000003756	10181	RBM5	RNA binding motif protein 5	40.7684	69.9337	85.9321	188.496	111.746	96.8854	67.7075	56.9309	47.032	43.8056	67.3731	80.9913
ENSG00000003987	9108	MTMR7	myotubularin related protein 7	19.0545	18.8361	20.9347	17.277	17.6266	7.63619	17.1277	33.5101	10.2509	26.337	28.1729	26.1879
ENSG00000003989	6542	SLC7A2	solute carrier family 7 member 2	6.92713	4.37981	3.73756	3.22113	5.42851	5.92066	11.7111	7.64801	3.69477	9.67539	12.3539	10.6233
ENSG00000004059	381	ARF5	ADP ribosylation factor 5	128.742	149.502	121.359	104.575	124.4	143.33	143.301	150.538	264.162	149.123	124	145.222
ENSG00000004139	23098	SARM1	sterile alpha and TIR motif containing 1	27.9532	24.1433	27.5962	29.3691	28.9896	13.8288	18.9939	16.6883	4.47262	6.27389	9.90827	9.9546
ENSG00000004142	26073	POLDIP2	DNA polymerase delta interacting protein 2	94.5678	109.468	85.0089	74.3271	91.4447	99.8144	98.1917	96.2199	108.315	93.5895	91.9837	102.767
ENSG00000004399	23129	PLXND1	plexin D1	63.5497	44.0348	73.5343	58.3765	74.7612	191.574	147.353	109.151	38.0867	49.6597	75.438	86.0367
ENSG00000004455	204	AK2	adenylate kinase 2	38.3917	34.3415	30.8667	33.7443	26.4883	61.487	25.0131	19.0914	51.0323	33.5498	24.1793	29.9205
ENSG00000004468	952	CD38	CD38 molecule	0	0	0	2.63547	4.46914	4.3725	8.41577	4.74901	7.36177	5.65428	7.90724	5.02577
ENSG00000004478	2288	FKBP4	FKBP prolyl isomerase 4	211.522	157.101	166.16	107.296	122.808	107.011	93.9663	125.629	117.705	129.035	137.319	127.842
ENSG00000004487	23028	KDM1A	lysine demethylase 1A	448.598	337.953	360.815	306.42	285.613	80.9018	74.8497	80.5425	50.1989	63.7084	59.9782	61.7194
ENSG00000004534	10180	RBM6	RNA binding motif protein 6	51.3495	57.6738	88.5154	153.805	81.5203	61.2778	65.6621	45.5638	30.8083	35.292	56.5496	51.4119
ENSG00000004660	84254	CAMKK1	calcium/calmodulin dependent protein kinase kinase 1	12.9573	21.6363	23.7137	26.7853	24.9013	25.8375	49.7658	135.852	97.8143	104.055	158.424	150.591
ENSG00000004700	5965	RECQL	RecQ like helicase	29.4921	18.5498	24.1525	23.3403	21.1002	9.85382	8.64456	10.547	7.25065	7.22551	9.57017	8.94954
ENSG00000004766	55610	VPS50	VPS50 subunit of EARP/GARPII complex	39.5161	44.9786	43.8999	40.91	40.6736	17.7201	27.1008	58.9907	36.6977	41.4345	47.5028	42.1238
ENSG00000004776	126393	HSPB6	heat shock protein family B (small) member 6	1.25921	1.92429	1.60689	2.22206	3.71229	23.1596	10.1764	5.85521	10.1398	11.2316	7.54345	9.14372
ENSG00000004777	115703	ARHGAP33	Rho GTPase activating protein 33	186.872	229.002	303.795	328.607	296.934	223.332	199.26	163.774	93.3139	114.554	92.4709	106.593
ENSG00000004779	4706	NDUFAB1	NADH:ubiquinone oxidoreductase subunit AB1	55.8152	61.1312	48.208	40.1521	42.4168	50.9846	56.6922	61.8516	212.491	80.1038	73.0148	74.8079
ENSG00000004799	5166	PDK4	pyruvate dehydrogenase kinase 4	5.28562	5.96475	6.48296	5.59822	10.1877	56.0475	18.6027	21.6471	14.6402	48.6221	41.1471	34.8821
ENSG00000004809	85413	SLC22A16	solute carrier family 22 member 16	0	0	0	0	0	0.523027	0	0	0	0	0	0
ENSG00000004838	51364	ZMYND10	zinc finger MYND-type containing 10	4.42615	7.81384	3.90784	3.25558	5.97886	44.6665	24.9959	17.146	11.5288	6.06626	7.19124	6.06722
ENSG00000004848	170302	ARX	aristaless related homeobox	167.767	100.335	92.1704	277.964	114.487	41.4865	26.5632	18.7481	18.4739	15.7871	12.5252	18.5586
ENSG00000004864	10165	SLC25A13	solute carrier family 25 member 13	14.9348	13.4636	11.828	12.385	11.3384	10.5233	11.1733	9.32637	8.47298	13.572	12.5682	15.1396
ENSG00000004866	7982	ST7	suppression of tumorigenicity 7	68.4485	60.641	54.5715	36.5004	53.0411	25.168	19.1225	18.0996	21.0852	18.6963	20.0474	18.4233
ENSG00000004897	996	CDC27	cell division cycle 27	67.0651	72.4945	65.4947	54.518	56.7835	31.0259	43.6752	70.0527	49.1433	77.4996	67.2579	56.0014
ENSG00000004939	6521	SLC4A1	solute carrier family 4 member 1 (Diego blood group)	7.54802	1.62924	2.27463	1.22299	2.9455	105.212	0	0	0	0	0	0
ENSG00000004948	799	CALCR	calcitonin receptor	0	0.449309	0	0	0	0	0.489502	0	0.694506	3.20975	0.707004	1.56327
ENSG00000004961	3052	HCCS	holocytochrome c synthase	12.9957	15.0197	11.7277	9.87009	12.3846	8.72408	12.4741	22.9059	22.6965	27.0625	24.1905	18.6613
ENSG00000004975	1856	DVL2	dishevelled segment polarity protein 2	54.1152	55.0565	54.7957	53.7601	49.3062	47.8883	22.8675	18.2141	13.9179	17.3024	16.7027	20.3376
ENSG00000005001	64063	PRSS22	serine protease 22	0	0	0	0	0	0	0	0	0.750067	0	0	0
ENSG00000005007	5976	UPF1	UPF1 RNA helicase and ATPase	127.513	121.668	135.173	101.164	124.618	119.564	122.461	122.349	45.6429	79.9821	110.779	107.291
ENSG00000005020	8935	SKAP2	src kinase associated phosphoprotein 2	5.55961	15.313	7.86773	9.11217	8.89957	10.9836	17.2689	30.9163	30.5861	41.4683	33.1121	29.1901
ENSG00000005022	292	SLC25A5	solute carrier family 25 member 5	192.346	176.905	163.594	100.131	134.528	145.38	198.948	148.287	319.723	185.605	151.99	174.77
ENSG00000005059	55013	MCUB	mitochondrial calcium uniporter dominant negative beta subunit	10.2292	19.0475	13.8832	42.9771	40.1642	17.3017	7.04755	8.18203	12.0844	6.63673	6.33143	5.91596
ENSG00000005075	5439	POLR2J	RNA polymerase II subunit J	20.9786	24.191	20.874	22.6512	18.9206	37.9717	29.5445	19.1677	60.0887	22.4818	16.6208	23.1971
ENSG00000005100	56919	DHX33	DEAH-box helicase 33	29.8416	25.51	31.7048	27.1298	24.4627	17.8038	21.8533	31.4884	14.3624	17.7373	27.0316	22.6159
ENSG00000005108	221981	THSD7A	thrombospondin type 1 domain containing 7A	47.1067	60.8307	56.7253	26.7164	47.695	10.9836	30.7745	34.0441	5.25047	19.3034	20.9388	16.0173
ENSG00000005156	3980	LIG3	DNA ligase 3	56.8357	43.4698	46.0731	39.6698	36.5345	16.0046	17.6206	20.5028	11.0288	19.38	23.296	19.8941
ENSG00000005175	79657	RPAP3	RNA polymerase II associated protein 3	21.2074	19.8144	18.8393	16.7602	16.9826	10.0212	12.7683	16.7264	7.91737	13.4675	16.2679	13.3988
ENSG00000005189	81691	REXO5	RNA exonuclease 5	9.84284	7.83502	8.43086	11.1448	7.54419	5.08382	3.94497	2.87992	3.41697	4.04996	4.253	4.17989
ENSG00000005194	57019	CIAPIN1	cytokine induced apoptosis inhibitor 1	74.4014	74.636	60.2025	49.2471	58.4184	43.453	41.3611	50.9803	74.9233	42.1153	41.1479	46.6815
ENSG00000005206	56928	SPPL2B	signal peptide peptidase like 2B	25.9891	34.6705	37.4473	57.8942	43.9136	81.4875	72.1573	36.7905	29.5304	32.4253	36.2521	41.7699
ENSG00000005238	80256	FAM214B	family with sequence similarity 214 member B	26.9159	35.0064	37.1435	43.3905	40.2663	55.4617	44.9881	32.9761	29.8638	29.6204	37.4507	40.9856
ENSG00000005243	51226	COPZ2	coatomer protein complex subunit zeta 2	0.65941	0.587925	0	0	1.68675	7.25961	4.53203	2.91807	11.3066	6.94905	5.6545	6.63085
ENSG00000005249	5577	PRKAR2B	protein kinase cAMP-dependent type II regulatory subunit beta	179.818	180.401	196.864	144.331	171.083	47.8046	71.2154	132.152	93.7028	105.824	89.2002	89.1653
ENSG00000005302	10943	MSL3	MSL complex subunit 3	34.0989	39.7681	38.2455	36.4315	36.7834	21.9044	25.4927	34.3874	54.0881	29.0154	32.9833	33.1903
ENSG00000005339	1387	CREBBP	CREB binding protein	178.174	196.545	296.956	258.052	229.012	93.036	125.412	126.583	40.5314	81.3621	98.5626	83.5971
ENSG00000005379	9256	TSPOAP1	TSPO associated protein 1	18.1007	24.6937	41.0122	55.8271	48.7243	235.843	392.697	345.19	133.929	156.781	213.08	186.245
ENSG00000005381	4353	MPO	myeloperoxidase	1.40113	0.820829	0.684569	0.809588	2.96122	0.98329	1.17387	1.31599	1.41679	2.05495	0.723519	1.37996
ENSG00000005421	5444	PON1	paraoxonase 1	0	0	0	0	0	1.27618	1.03192	0.438664	1.36123	0.904787	0.913205	0.890945
ENSG00000005436	6936	GCFC2	GC-rich sequence DNA-binding factor 2	13.6213	12.857	13.2305	12.7295	11.4107	10.0212	8.18253	7.99131	9.97311	7.93206	8.62338	7.66839
ENSG00000005448	84058	WDR54	WD repeat domain 54	42.066	37.6203	33.7557	29.3347	33.762	55.4617	32.0465	29.4286	47.0875	27.0425	25.3696	28.6576
ENSG00000005469	54677	CROT	carnitine O-octanoyltransferase	5.66142	8.54602	8.99465	12.2127	19.7632	9.22619	9.39518	9.82225	7.30621	8.81894	8.50766	9.22829
ENSG00000005471	5244	ABCB4	ATP binding cassette subfamily B member 4	2.20237	1.89841	2.21155	1.6364	2.32046	2.90803	1.60339	1.35414	0.527825	0.813473	0.466923	0.698803
ENSG00000005483	55904	KMT2E	lysine methyltransferase 2E	164.766	153.895	204.533	174.027	191.259	92.3665	92.407	89.6972	38.6423	88.6359	97.3577	74.8794
ENSG00000005486	57414	RHBDD2	rhomboid domain containing 2	99.2172	102.181	76.2067	45.4575	88.1676	177.975	287.271	428.918	402.619	481.838	426.361	428.573
ENSG00000005513	30812	SOX8	SRY-box 8	128.831	83.1222	78.7261	146.742	76.5111	190.905	194.398	129.749	113.205	141.169	133.679	143.519
ENSG00000005700	25998	IBTK	inhibitor of Bruton tyrosine kinase	62.1509	56.8792	64.0356	63.9919	57.5247	29.8125	32.9639	43.3896	22.1409	31.7513	41.4581	38.477
ENSG00000005801	7748	ZNF195	zinc finger protein 195	47.9378	38.9301	42.7194	51.2797	37.5224	9.85382	13.1187	11.6913	13.4179	12.4238	14.7409	13.1087
ENSG00000005810	23077	MYCBP2	MYC binding protein 2	117.308	131.349	198.549	188.703	196.154	54.6667	154.151	409.464	83.3685	153.682	293.373	203.98
ENSG00000005812	26224	FBXL3	F-box and leucine rich repeat protein 3	50.3267	55.06	51.2737	72.0533	60.1568	39.5617	40.7626	52.6969	44.0873	56.5785	56.1732	50.4447
ENSG00000005844	3683	ITGAL	integrin subunit alpha L	0	0.426438	0	0	1.00394	4.03777	1.23596	1.583	0.694506	0.592958	0.528717	0.886225
ENSG00000005882	5164	PDK2	pyruvate dehydrogenase kinase 2	31.2781	32.1312	27.411	24.3049	34.7754	49.9386	44.4919	66.4289	51.699	65.6343	74.0202	77.7961
ENSG00000005884	3675	ITGA3	integrin subunit alpha 3	15.4578	20.6444	23.331	19.5851	24.4341	28.7665	43.5621	40.4524	22.0853	31.0956	32.5924	34.8431
ENSG00000005889	7543	ZFX	zinc finger protein X-linked	28.0277	35.9509	33.7403	48.4547	28.4284	18.2641	18.3154	26.9111	8.36186	16.9865	25.436	20.8186
ENSG00000005893	3920	LAMP2	lysosomal associated membrane protein 2	37.874	39.0411	35.3848	31.0572	56.3418	105.923	66.9433	136.234	116.149	260.607	248.552	227.824
ENSG00000005955	---	---	---	66.1297	58.0104	75.3043	78.5645	65.0747	43.5786	47.5145	57.2361	49.9211	67.4017	68.7581	63.1622
ENSG00000005961	3674	ITGA2B	integrin subunit alpha 2b	2.08528	1.38456	1.59686	2.77327	2.31271	4.45619	1.79425	0.553098	1.41679	0	1.48961	1.72845
ENSG00000005981	51666	ASB4	ankyrin repeat and SOCS box containing 4	0	0	0	0	0	0.815921	0	0.476808	0.416704	1.54268	1.392	1.58077
ENSG00000006007	51573	GDE1	glycerophosphodiester phosphodiesterase 1	54.107	52.8887	44.2204	31.2294	47.5383	45.4615	59.4559	92.4436	107.037	105.433	99.7852	98.9867
ENSG00000006015	55049	REX1BD	required for excision 1-B domain containing	23.8547	31.9823	32.4725	46.5255	40.8945	60.5246	55.3312	53.4979	162.32	43.358	37.685	61.9025
ENSG00000006016	9244	CRLF1	cytokine receptor like factor 1	0.681993	1.36316	1.63879	1.67085	2.64722	19.1428	10.7782	10.9284	21.5297	16.703	14.4431	28.7351
ENSG00000006025	114881	OSBPL7	oxysterol binding protein like 7	3.73982	5.25305	8.20734	15.6233	14.957	22.532	16.9106	12.5305	10.4176	9.22209	15.7025	20.2957
ENSG00000006042	26022	TMEM98	transmembrane protein 98	97.9981	91.6866	68.9356	68.1949	71.664	64.0394	22.8908	28.3987	28.8081	34.6253	37.2528	54.4698
ENSG00000006047	51087	YBX2	Y-box binding protein 2	0.538613	1.79607	1.61657	1.60195	1.55472	2.07119	2.1301	2.07888	3.52809	2.54939	1.67456	2.04295
ENSG00000006062	9020	MAP3K14	mitogen-activated protein kinase kinase kinase 14	3.94018	7.04801	8.89786	11.7304	9.25249	11.4438	7.79705	9.93669	5.36159	2.64725	6.2639	8.43707
ENSG00000006071	6833	ABCC8	ATP binding cassette subfamily C member 8	2.04335	4.4294	6.15402	9.45668	13.9207	11.2765	21.9917	29.5812	16.5848	21.0276	26.1617	34.5323
ENSG00000006075	---	---	---	0	0	0	0	0	0.439342	0	0	0	0	0	0
ENSG00000006114	---	---	---	92.7517	73.2801	86.3878	80.287	83.3054	32.6578	37.4592	44.572	18.6961	38.745	47.3867	41.3794
ENSG00000006116	10368	CACNG3	calcium voltage-gated channel auxiliary subunit gamma 3	7.60231	21.0133	21.5217	18.8617	24.0024	34.6662	92.4803	168.351	144.207	167.441	142.344	117.67
ENSG00000006118	54972	TMEM132A	transmembrane protein 132A	190.962	265.475	274.787	202.276	276.533	277.936	377.64	286.028	193.267	255.019	214.272	229.735
ENSG00000006125	163	AP2B1	adaptor related protein complex 2 subunit beta 1	848.291	687.476	716.981	420.693	733.865	513.591	451.471	784.045	338.725	495.163	558.541	506.536
ENSG00000006128	6863	TAC1	tachykinin precursor 1	30.3286	12.655	9.96556	5.01256	4.67735	2.69882	12.0545	36.7142	96.9809	39.2355	20.1856	32.7211
ENSG00000006194	10127	ZNF263	zinc finger protein 263	36.9465	40.4448	36.5212	41.0478	34.3533	30.1054	23.1682	30.2296	23.3076	23.7985	26.2909	27.2086
ENSG00000006210	6376	CX3CL1	C-X3-C motif chemokine ligand 1	28.4957	40.5968	22.824	18.6894	36.2441	133.539	316.183	504.444	217.103	218.054	284.104	210.932
ENSG00000006282	64847	SPATA20	spermatogenesis associated 20	18.4286	22.2135	24.2592	26.9576	39.5953	108.559	67.2477	39.5751	73.7566	63.286	57.119	73.2649
ENSG00000006283	8913	CACNA1G	calcium voltage-gated channel subunit alpha1 G	23.2806	29.6828	23.0024	20.2053	18.5922	18.6825	65.5908	74.2486	21.7519	28.3451	32.5443	29.2043
ENSG00000006327	51330	TNFRSF12A	TNF receptor superfamily member 12A	0.874025	0.570526	0.764781	0	0.588157	8.89145	3.01861	0.629387	1.6946	1.05538	0.42411	0.766229
ENSG00000006377	1750	DLX6	distal-less homeobox 6	67.159	35.7627	19.4073	33.8477	10.0472	3.74487	4.03408	2.3459	2.528	5.03072	5.03208	3.75252
ENSG00000006432	4293	MAP3K9	mitogen-activated protein kinase kinase kinase 9	45.6184	46.4081	55.8231	30.506	31.3299	11.5275	44.639	105.26	24.53	68.4169	84.426	65.7983
ENSG00000006451	5898	RALA	RAS like proto-oncogene A	128.805	149.884	125.116	103.782	144.539	74.0396	81.2562	81.0002	80.0349	87.624	78.8338	66.0267
ENSG00000006453	55971	BAIAP2L1	BAI1 associated protein 2 like 1	0.639884	0.600107	0.764309	0.533984	0.555321	1.44355	2.18359	0.705676	1.36123	0.91472	0.986599	1.20229
ENSG00000006459	80853	KDM7A	lysine demethylase 7A	40.9516	31.4369	31.2197	41.3923	32.5895	14.0799	19.4212	27.8647	6.195	14.5182	19.5242	12.6592
ENSG00000006468	2115	ETV1	ETS variant 1	54.8213	135	110.55	50.8318	120.91	78.726	106.635	89.5446	62.1444	97.5356	106.454	56.9332
ENSG00000006530	55750	AGK	acylglycerol kinase	35.4985	32.0797	27.4222	23.9948	28.2894	18.6407	26.0427	33.3194	17.196	27.7923	32.4137	31.4508
ENSG00000006534	221	ALDH3B1	aldehyde dehydrogenase 3 family member B1	0.46157	0.813114	0.756087	1.2919	1.14208	4.03777	3.41725	3.29951	2.19464	2.84438	2.16106	2.99781
ENSG00000006555	55001	TTC22	tetratricopeptide repeat domain 22	0	0	0	0.568434	0	0	0.55941	0.8964	0.583385	0.53713	0.794346	1.08785
ENSG00000006576	57157	PHTF2	putative homeodomain transcription factor 2	33.9661	38.0174	35.5272	35.3979	35.6426	16.7159	17.7063	27.7502	19.8073	20.8834	17.3099	16.075
ENSG00000006607	9855	FARP2	FERM, ARH/RhoGEF and pleckstrin domain protein 2	32.9483	24.0411	28.66	23.0302	26.9069	30.1054	28.1163	28.6657	12.7511	22.7808	25.3077	25.0308
ENSG00000006611	10083	USH1C	USH1 protein network component harmonin	0	0	0	0	0	0.774079	2.00367	6.04593	11.251	6.37164	5.85721	10.8926
ENSG00000006625	79017	GGCT	gamma-glutamylcyclotransferase	22.7168	20.0605	19.021	19.0684	16.2757	15.377	21.3234	23.9739	34.5864	30.0757	26.609	25.5385
ENSG00000006634	10926	DBF4	DBF4 zinc finger	20.9208	17.0008	14.0395	15.8989	6.43085	3.24276	2.86497	3.14694	2.63912	2.95951	2.87419	2.37855
ENSG00000006638	6915	TBXA2R	thromboxane A2 receptor	1.11072	1.2821	0.621273	1.7742	3.68839	6.00435	3.56632	1.20156	2.13908	1.86552	1.09744	1.48469
ENSG00000006652	3475	IFRD1	interferon related developmental regulator 1	38.3594	46.489	38.2446	37.3961	45.282	34.4151	22.8768	35.8751	34.5864	26.1697	34.462	32.9898
ENSG00000006695	1352	COX10	cytochrome c oxidase assembly factor heme A:farnesyltransferase COX10	16.8665	15.1222	16.2123	13.0051	14.163	12.0715	11.7554	11.7295	10.362	10.0516	8.83555	9.95588
ENSG00000006704	9569	GTF2IRD1	GTF2I repeat domain containing 1	53.9892	45.3184	52.5993	51.4864	39.4781	22.7412	19.5245	14.0563	8.25073	10.0433	12.5893	14.1237
ENSG00000006712	54623	PAF1	PAF1 homolog, Paf1/RNA polymerase II complex component	92.6451	81.3552	97.5985	88.5207	83.7673	54.5412	64.0265	65.0176	60.7554	85.2066	63.3197	66.3546
ENSG00000006715	27072	VPS41	VPS41 subunit of HOPS complex	78.3788	71.0349	85.9794	79.7703	104.131	57.512	71.2608	120.48	70.9785	85.2555	100.224	91.8788
ENSG00000006740	9912	ARHGAP44	Rho GTPase activating protein 44	10.3087	14.3415	19.8206	15.2788	15.7975	26.9254	76.666	177.888	106.593	115.261	122.116	94.1003
ENSG00000006744	60528	ELAC2	elaC ribonuclease Z 2	62.6087	54.4458	56.4406	44.9408	53.2353	39.8128	55.841	55.7866	49.0877	47.673	53.0491	57.6092
ENSG00000006747	85477	SCIN	scinderin	0.582329	0.944675	0.687266	1.22299	3.53229	13.3267	2.008	2.38404	1.19455	2.76021	0.694674	1.49724
ENSG00000006756	414	ARSD	arylsulfatase D	6.49771	7.87109	10.7394	16.6568	14.7555	16.3812	11.3861	7.95316	6.25056	5.67728	6.64968	7.46336
ENSG00000006757	8228	PNPLA4	patatin like phospholipase domain containing 4	7.32983	10.5564	6.79042	6.63173	6.48315	13.6196	13.1536	19.511	20.0851	22.2613	18.5589	20.3652
ENSG00000006831	79602	ADIPOR2	adiponectin receptor 2	87.273	83.8547	80.5451	66.2312	85.1413	77.1778	67.6174	82.259	56.755	137.864	138.205	119.791
ENSG00000006837	51265	CDKL3	cyclin dependent kinase like 3	0.720679	0.789186	0.932822	1.2919	0.769534	0.774079	0.61644	0.629387	2.2502	0.794037	0.821188	0.791282
ENSG00000007001	151531	UPP2	uridine phosphorylase 2	0.642344	0.705558	0.987077	1.7053	2.55054	3.03355	3.29984	4.8253	4.58374	5.99234	3.11694	4.46703
ENSG00000007047	57787	MARK4	microtubule affinity regulating kinase 4	86.9325	85.119	113.586	85.1446	103.858	125.422	132.781	144.13	83.0352	109.301	84.9377	90.6889
ENSG00000007062	8842	PROM1	prominin 1	50.1361	26.8803	30.7111	34.1233	27.7785	53.2023	23.2287	12.4924	7.30621	5.57862	7.4276	7.15484
ENSG00000007080	115098	CCDC124	coiled-coil domain containing 124	65.8326	77.2241	71.3508	65.3699	67.16	77.0104	95.6314	94.923	136.595	85.4152	59.5515	72.1096
ENSG00000007129	90273	CEACAM21	carcinoembryonic antigen related cell adhesion molecule 21	0.725291	0.548676	0	0	0.543807	1.52724	0.69418	0.781966	1.02787	2.55737	1.69576	0.822333
ENSG00000007168	5048	PAFAH1B1	platelet activating factor acetylhydrolase 1b regulatory subunit 1	297.538	375.983	365.957	314	404.959	151.615	253.98	518.253	213.713	359.191	382.909	372.799
ENSG00000007171	4843	NOS2	nitric oxide synthase 2	2.16332	1.44827	2.3694	1.18854	2.67656	6.59013	3.18649	6.57996	1.80572	2.46178	3.54126	3.82607
ENSG00000007174	1770	DNAH9	dynein axonemal heavy chain 9	3.60461	5.46924	3.73963	1.73975	10.2243	21.3604	27.1972	36.2184	7.36177	9.70897	14.3003	11.9136
ENSG00000007202	9703	KIAA0100	KIAA0100	183.898	127.997	148.463	115.048	116.287	73.1191	124.576	186.661	70.7007	123.47	142.439	149.355
ENSG00000007237	8522	GAS7	growth arrest specific 7	132.366	120.627	224.301	167.171	174.864	93.4125	305.703	756.847	191.323	504.277	567.804	557.292
ENSG00000007255	79090	TRAPPC6A	trafficking protein particle complex 6A	6.46386	7.12141	5.87267	5.87382	6.6638	17.3436	10.8449	10.2418	27.8636	12.4604	9.64333	13.4776
ENSG00000007264	4145	MATK	megakaryocyte-associated tyrosine kinase	7.68411	18.1395	15.0866	16.3468	14.8069	54.4575	96.267	98.0127	141.263	79.1436	62.4534	71.9607
ENSG00000007312	974	CD79B	CD79b molecule	0	0	0	0	0	2.36408	0.70944	0.400519	1.41679	1.22046	0	0.536479
ENSG00000007314	6329	SCN4A	sodium voltage-gated channel alpha subunit 4	0	0	0	0	0	0.439342	0.657478	0.400519	0	0	0	0
ENSG00000007341	54879	ST7L	suppression of tumorigenicity 7 like	7.16463	6.01601	7.25379	8.52651	7.94969	5.58592	4.99834	4.29128	6.41724	4.78715	5.37785	5.14665
ENSG00000007350	8277	TKTL1	transketolase like 1	4.191	5.73329	6.79678	3.87569	8.22833	3.36829	1.10463	0.553098	0.638946	0	0	0
ENSG00000007372	5080	PAX6	paired box 6	130.725	109.518	99.4741	99.2348	72.0471	55.2525	37.2407	19.6636	41.4759	36.7282	38.8942	27.1007
ENSG00000007376	113000	RPUSD1	RNA pseudouridine synthase domain containing 1	15.6341	24.1058	18.0298	21.3766	19.2372	19.7286	26.4413	26.3389	35.8643	19.0603	19.1861	23.4541
ENSG00000007384	64285	RHBDF1	rhomboid 5 homolog 1	1.55096	2.52106	1.92827	1.08519	2.94012	82.4918	29.2498	11.7676	10.1954	10.1862	9.56522	11.6261
ENSG00000007392	55692	LUC7L	LUC7 like	60.0595	61.9257	79.639	150.532	63.2659	56.2149	61.216	37.3627	49.4211	30.4746	46.1849	49.4301
ENSG00000007402	9254	CACNA2D2	calcium voltage-gated channel auxiliary subunit alpha2delta 2	31.6532	30.3008	28.7411	16.1056	16.7776	10.7743	25.1135	24.0121	11.0843	20.1493	19.1794	24.5269
ENSG00000007516	8938	BAIAP3	BAI1 associated protein 3	29.7576	20.2468	17.9559	15.8989	25.7774	79.3954	174.237	147.029	77.5347	155.331	171.307	231.357
ENSG00000007520	115939	TSR3	TSR3 ribosome maturation factor	42.1257	53.8109	38.5776	48.1447	36.2922	55.3362	54.1881	57.3505	63.8112	47.9658	34.6848	49.0782
ENSG00000007541	9091	PIGQ	phosphatidylinositol glycan anchor biosynthesis class Q	44.5586	53.9597	48.3929	45.5609	51.7813	89.3539	85.6777	69.6712	62.5889	43.3512	54.7969	63.5729
ENSG00000007545	57585	CRAMP1	cramped chromatin regulator homolog 1	14.8135	16.028	22.2605	26.1997	19.474	11.9459	15.2277	12.7594	5.69495	10.8254	13.9386	14.0434
ENSG00000007866	7005	TEAD3	TEA domain transcription factor 3	4.7391	2.6363	3.55682	3.87569	2.74475	14.7493	4.39822	1.65929	2.13908	3.42009	2.06526	2.77319
ENSG00000007908	6401	SELE	selectin E	0	0	0	0	0	1.90382	0.975801	0	0	0	0	0.4215
ENSG00000007923	55735	DNAJC11	DnaJ heat shock protein family (Hsp40) member C11	33.7371	33.9206	40.4239	44.6996	41.2616	16.5486	28.7759	43.8092	16.307	36.0688	32.613	33.9056
ENSG00000007933	2328	FMO3	flavin containing monooxygenase 3	0	0	0	0	0	2.57329	1.26615	1.16341	0.916748	0	0.799673	0.748601
ENSG00000007944	29116	MYLIP	myosin regulatory light chain interacting protein	10.383	5.83504	8.93909	11.7649	9.06073	12.2388	9.67419	19.8543	9.30638	20.4939	23.0584	20.8243
ENSG00000007952	27035	NOX1	NADPH oxidase 1	0	0.588009	0.673444	0	0.646037	0	0.622642	0	1.58347	0	0.747211	0.680079
ENSG00000007968	1870	E2F2	E2F transcription factor 2	43.8637	21.8235	20.8611	23.5814	3.99338	7.63619	1.20877	0.476808	0	0	0	0
ENSG00000008018	5689	PSMB1	proteasome subunit beta 1	123.005	121.314	88.6181	85.2135	93.7375	89.3539	69	66.7341	254.162	84.6753	85.3663	97.4401
ENSG00000008056	6853	SYN1	synapsin I	68.4698	96.5948	83.6878	51.9687	108.951	191.658	395.197	757.877	374.839	762.859	708.894	620.959
ENSG00000008083	3720	JARID2	jumonji and AT-rich interaction domain containing 2	65.8239	41.0953	56.7734	53.0022	39.6209	26.1304	28.1238	23.1347	11.6955	15.9927	22.9059	18.6895
ENSG00000008086	6792	CDKL5	cyclin dependent kinase like 5	8.52292	8.09245	15.248	9.45668	14.2456	3.20092	10.3593	54.833	1.36123	13.9566	15.4767	8.98742
ENSG00000008118	57172	CAMK1G	calcium/calmodulin dependent protein kinase IG	10.8684	11.9563	8.17686	4.66805	8.0013	12.4899	20.9308	62.6908	44.6429	59.7892	61.6128	66.3715
ENSG00000008128	728642	CDK11A	cyclin dependent kinase 11A	0.852386	0.894683	1.19212	1.87756	1.77166	1.1925	0.889652	0.82011	0.694506	0.831187	0.590785	0.941498
ENSG00000008130	65220	NADK	NAD kinase	46.5352	44.5117	42.9102	44.8374	40.0674	45.6288	39.9535	44.2669	22.1964	32.0208	33.9649	32.6859
ENSG00000008197	83741	TFAP2D	transcription factor AP-2 delta	5.84031	18.9802	4.39175	1.2919	2.75851	1.06697	1.53211	3.41395	1.75016	4.15035	3.21592	0.608248
ENSG00000008226	9940	DLEC1	DLEC1 cilia and flagella associated protein	0	0.747627	0.620699	0.671786	1.24592	11.4438	6.71069	6.57996	1.02787	2.30352	1.44656	2.4488
ENSG00000008256	9265	CYTH3	cytohesin 3	46.1633	46.5387	54.3627	54.518	68.3243	121.028	103.482	79.894	38.8646	40.1411	56.2401	59.0774
ENSG00000008277	53616	ADAM22	ADAM metallopeptidase domain 22	57.7879	68.2003	66.0205	68.1949	80.546	55.9638	97.6985	206.344	59.4775	124.605	147.422	104.968
ENSG00000008282	6856	SYPL1	synaptophysin like 1	16.3906	18.9069	15.5791	15.4511	26.4302	57.3028	32.9366	33.7771	46.4208	39.4924	48.8595	46.7554
ENSG00000008283	1534	CYB561	cytochrome b561	16.5862	26.0573	20.0559	18.9306	26.2232	34.1223	65.5104	70.2053	52.9214	54.8081	59.4319	57.7046
ENSG00000008294	9043	SPAG9	sperm associated antigen 9	279.64	299.985	325.899	350.483	368.352	197.599	192.262	218.435	123.094	170.377	245.456	224.404
ENSG00000008300	1951	CELSR3	cadherin EGF LAG seven-pass G-type receptor 3	158.235	162.464	226.38	197.453	174.076	31.3188	53.2039	73.4476	20.9185	30.0014	54.4738	48.6647
ENSG00000008311	10157	AASS	aminoadipate-semialdehyde synthase	8.97792	5.47002	11.4635	15.7611	10.111	7.42698	13.576	7.19027	1.47235	4.75934	8.04057	6.76698
ENSG00000008324	51188	SS18L2	SS18 like 2	14.9703	18.8983	14.9561	17.3803	14.8595	15.1678	12.5741	12.2635	47.0875	13.1502	17.8086	16.9847
ENSG00000008382	84954	MPND	MPN domain containing	27.5478	23.3977	23.743	20.2053	20.9452	15.7954	22.6378	21.9904	37.5311	23.9894	18.4976	20.3262
ENSG00000008394	4257	MGST1	microsomal glutathione S-transferase 1	4.36535	7.80417	3.19105	3.08333	4.59377	40.6496	23.191	20.5409	98.2587	54.0112	60.1377	54.1781
ENSG00000008405	1407	CRY1	cryptochrome circadian regulator 1	53.828	47.6027	40.1021	34.6056	36.0885	29.0175	16.8842	21.7615	16.3626	16.4498	16.1227	18.5288
ENSG00000008438	8993	PGLYRP1	peptidoglycan recognition protein 1	0	0	0	0	0	0.690395	0.609742	0	0	0	0	0
ENSG00000008441	4784	NFIX	nuclear factor I X	90.6449	192.8	441.927	552.294	467.046	328.858	299.809	326.194	142.652	237.801	244.348	222.817
ENSG00000008513	6482	ST3GAL1	ST3 beta-galactoside alpha-2,3-sialyltransferase 1	21.6073	26.1497	47.4305	48.1791	46.6929	64.4996	49.047	42.2834	16.9737	24.2258	40.8254	28.2792
ENSG00000008516	64386	MMP25	matrix metallopeptidase 25	3.58038	3.24905	2.93761	1.73975	4.23163	12.7409	3.19135	1.54486	1.02787	0.4724	0	0.536011
ENSG00000008517	9235	IL32	interleukin 32	1.10031	1.28081	1.02263	0.740687	2.39954	41.6957	8.11656	3.71911	9.91755	3.36129	1.07504	3.06178
ENSG00000008710	5310	PKD1	polycystin 1, transient receptor potential channel interacting	23.8665	45.4	99.7084	241.619	113.138	262.287	199.816	169.191	66.5893	66.903	162.026	172.412
ENSG00000008735	23542	MAPK8IP2	mitogen-activated protein kinase 8 interacting protein 2	178.731	191.399	234.285	205.653	207.341	379.613	384.028	490.102	463.625	576.88	418.825	449.785
ENSG00000008838	9862	MED24	mediator complex subunit 24	170.418	142.96	143.031	113.773	160.476	95.421	132.737	122.387	71.0897	94.0181	106.72	100.873
ENSG00000008853	23221	RHOBTB2	Rho related BTB domain containing 2	94.5568	84.4615	89.0044	73.7759	76.3928	49.6038	119.535	159.311	58.4219	90.9165	118.643	103.884
ENSG00000008869	54497	HEATR5B	HEAT repeat containing 5B	102.216	73.8798	100.411	82.9053	100.526	30.4401	38.9144	66.7722	17.1404	42.1876	48.0918	48.4386
ENSG00000008952	7095	SEC62	SEC62 homolog, preprotein translocation factor	146.84	140.921	146.019	111.189	148.402	116.509	143.139	185.288	266.829	273.664	209.919	184.397
ENSG00000008988	6224	RPS20	ribosomal protein S20	572.929	593.612	475.547	644.415	334.426	734.643	248.15	161.104	509.851	405.618	149.096	191.053
ENSG00000009307	7812	CSDE1	cold shock domain containing E1	839.33	645.32	744.382	623.882	612.223	281.158	299.042	400.309	272.219	507.092	416.097	394.35
ENSG00000009335	9690	UBE3C	ubiquitin protein ligase E3C	50.6438	69.5333	66.0786	69.4696	72.0357	48.5996	67.3338	97.3643	34.0864	80.6682	80.8761	74.0327
ENSG00000009413	5980	REV3L	REV3 like, DNA directed polymerase zeta catalytic subunit	70.5429	87.131	98.9802	75.8774	95.5179	67.5541	56.3527	37.8204	9.91755	19.9271	32.3939	24.5759
ENSG00000009694	10178	TENM1	teneurin transmembrane protein 1	11.8671	28.3089	28.5637	36.087	34.7138	20.9838	35.4576	55.8247	28.5859	23.6386	33.1434	27.4328
ENSG00000009709	5081	PAX7	paired box 7	0	0	0	0	0	0	1.53424	3.26137	1.52791	0.868006	2.05588	2.41347
ENSG00000009724	10747	MASP2	mannan binding lectin serine peptidase 2	1.8036	1.98937	2.88842	6.14942	4.70147	1.9875	1.85293	1.43043	0.472264	1.54827	2.5872	1.85796
ENSG00000009780	199870	FAM76A	family with sequence similarity 76 member A	8.48853	10.5786	9.22515	9.69783	8.10195	8.59856	10.6828	10.0893	10.4176	10.8936	14.5712	11.1392
ENSG00000009790	80342	TRAF3IP3	TRAF3 interacting protein 3	0.936032	1.1073	0.4913	0.94739	0.825393	3.36829	1.61512	1.81187	1.75016	1.3944	0.950092	1.79535
ENSG00000009830	29954	POMT2	protein O-mannosyltransferase 2	24.5506	25.6086	24.8695	36.6382	26.727	34.9591	33.1702	29.0472	17.196	23.337	28.8823	33.124
ENSG00000009844	51534	VTA1	vesicle trafficking 1	111.583	115.724	113.137	103.231	118.491	52.9512	50.8477	78.7497	63.0889	67.4008	55.2233	49.3317
ENSG00000009950	51085	MLXIPL	MLX interacting protein like	0	0	0	0	0	2.7825	2.83849	4.44385	7.13952	6.34985	8.7951	13.0841
ENSG00000009954	9031	BAZ1B	bromodomain adjacent to zinc finger domain 1B	220.919	151.69	216.614	153.253	149.698	47.8883	82.6731	84.8528	34.1419	69.9933	93.3313	80.5531
ENSG00000010017	10048	RANBP9	RAN binding protein 9	58.4345	65.2572	70.3381	59.3066	65.008	42.1141	53.0947	73.3331	56.1994	71.3787	70.2666	69.0767
ENSG00000010030	51513	ETV7	ETS variant 7	0	0	0	0	0	0	0	0	0.416704	0.908014	0	0.529418
ENSG00000010072	83932	SPRTN	SprT-like N-terminal domain	12.8707	10.7946	9.75494	10.4902	9.53465	5.41856	7.19825	7.91502	5.58383	8.48648	6.31837	6.68506
ENSG00000010165	51603	EEF1AKNMT	eEF1A lysine and N-terminal methyltransferase	41.6109	40.6627	40.1201	35.6736	35.6846	22.4065	21.9513	30.9925	22.752	29.9789	31.631	30.5592
ENSG00000010219	8798	DYRK4	dual specificity tyrosine phosphorylation regulated kinase 4	6.9398	8.58492	5.85123	6.45948	6.77039	20.8165	10.8903	12.3017	25.53	14.4536	10.4044	13.1571
ENSG00000010244	7756	ZNF207	zinc finger protein 207	160.067	169.93	135.455	140.886	131.849	96.9273	80.1638	79.627	94.4251	77.7776	87.1225	90.9516
ENSG00000010256	7384	UQCRC1	ubiquinol-cytochrome c reductase core protein 1	244.119	227.5	182.275	132.273	163.377	180.193	190.101	201.308	343.892	197.435	191.873	219.443
ENSG00000010270	83930	STARD3NL	STARD3 N-terminal like	89.1647	90.2159	59.6642	55.4137	56.395	69.7299	46.5922	50.8278	70.7007	56.9798	47.997	48.1719
ENSG00000010278	928	CD9	CD9 molecule	7.31216	8.45587	6.83306	9.90454	30.8523	289.276	71.9811	109.342	207.491	182.163	118.458	124.596
ENSG00000010282	57467	HHATL	hedgehog acyltransferase like	0	0	0	0	0	1.23434	5.79546	5.66448	11.8066	31.1581	23.9541	61.5192
ENSG00000010292	9918	NCAPD2	non-SMC condensin I complex subunit D2	221.887	96.5571	105.448	101.302	44.3728	20.0215	19.9802	24.4317	6.7506	18.7477	25.1567	23.8187
ENSG00000010295	25900	IFFO1	intermediate filament family orphan 1	14.2821	14.1949	19.0306	21.2388	19.8883	29.1012	31.7841	32.2895	26.8079	22.9324	27.8425	36.085
ENSG00000010310	2696	GIPR	gastric inhibitory polypeptide receptor	0	0	0	0	0	0.941448	0.710038	0.781966	0.416704	0.427453	1.76727	1.51836
ENSG00000010318	51533	PHF7	PHD finger protein 7	3.12495	2.12105	3.28915	4.46135	2.56851	4.95829	3.30553	2.84178	1.47235	2.07576	3.54774	3.82578
ENSG00000010319	56920	SEMA3G	semaphorin 3G	4.00379	7.33932	4.79459	3.97904	11.631	56.0894	53.3914	24.9657	15.4736	9.61535	15.2493	22.2266
ENSG00000010322	11188	NISCH	nischarin	159.905	157.453	180.471	178.953	189.762	163.038	207.614	360.982	160.764	274.218	299.938	307.775
ENSG00000010327	23166	STAB1	stabilin 1	7.78446	7.50695	8.63537	9.49113	23.3201	62.9096	35.7801	27.1781	9.75087	8.69621	8.29315	14.7873
ENSG00000010361	80199	FUZ	fuzzy planar cell polarity protein	34.3272	33.2391	24.0685	18.8272	18.721	37.5533	20.9903	20.8079	34.3086	19.5283	19.6553	24.4466
ENSG00000010379	6540	SLC6A13	solute carrier family 6 member 13	1.00822	0	0	0.706236	2.56069	4.95829	14.7552	3.60467	5.25047	4.5982	5.99987	7.71984
ENSG00000010404	3423	IDS	iduronate 2-sulfatase	138.589	175.322	176.58	145.64	236.045	324.8	446.058	1085.92	837.213	1346.14	987.813	909.524
ENSG00000010438	5646	PRSS3	serine protease 3	0.902874	1.16878	0.560019	0.499533	0.585943	11.2346	13.9499	20.2357	98.7032	36.7476	26.7136	26.6733
ENSG00000010539	7752	ZNF200	zinc finger protein 200	13.8806	13.3618	11.5046	12.2127	9.84145	5.58592	4.76037	4.63458	5.91719	4.61184	5.90377	4.85844
ENSG00000010610	920	CD4	CD4 molecule	2.06596	2.83373	1.37181	1.6364	9.19869	38.6412	20.29	10.7377	11.1399	14.6428	10.2981	10.7671
ENSG00000010626	10233	LRRC23	leucine rich repeat containing 23	7.82019	8.92225	8.37667	8.83657	7.96286	34.5825	23.8301	17.0697	22.5853	15.3878	14.5279	16.9309
ENSG00000010671	695	BTK	Bruton tyrosine kinase	0	0.657868	0	0.499533	1.5368	3.70303	1.34635	1.96445	1.13899	1.69124	0.887764	1.20106
ENSG00000010704	3077	HFE	homeostatic iron regulator	0.565613	0.401579	0.679035	0.775138	1.43443	4.49803	1.74799	2.3459	1.63903	1.75343	1.82872	2.14246
ENSG00000010803	22955	SCMH1	Scm polycomb group protein homolog 1	48.7138	47.562	46.084	39.9454	49.2045	42.7836	46.2241	37.2101	31.6973	32.2562	32.9358	38.0092
ENSG00000010810	2534	FYN	FYN proto-oncogene, Src family tyrosine kinase	262.583	318.483	318.842	261.669	335.831	349.947	319.056	228.963	132.04	245.245	211.112	194.027
ENSG00000010818	3097	HIVEP2	human immunodeficiency virus type I enhancer binding protein 2	85.217	78.3451	169.689	123.833	148.41	60.9431	162.908	422.433	70.7007	118.918	164.617	125.563
ENSG00000010932	2326	FMO1	flavin containing monooxygenase 1	1.76419	2.17936	1.46289	2.66992	6.33301	0.732237	0.539096	0	1.47235	0.763855	0	0
ENSG00000011007	6924	ELOA	elongin A	66.6689	66.1229	64.9435	68.5049	66.4704	36.5073	30.6785	30.3059	18.585	35.3995	31.2546	28.3548
ENSG00000011009	11313	LYPLA2	lysophospholipase 2	39.3862	48.3291	37.409	34.1577	37.0405	47.3862	43.5447	37.706	36.92	23.5075	32.8057	32.9505
ENSG00000011021	1185	CLCN6	chloride voltage-gated channel 6	54.8817	68.5083	79.6262	66.5413	88.0672	64.3741	78.4945	102.743	43.365	97.7312	109.745	107.393
ENSG00000011028	9902	MRC2	mannose receptor C type 2	68.3945	62.0047	63.7998	30.8505	90.2408	79.8557	65.9079	26.6059	13.9179	13.3005	14.2222	17.7253
ENSG00000011083	6534	SLC6A7	solute carrier family 6 member 7	6.25731	4.65223	7.24719	1.4297	3.52432	8.93329	34.8494	44.8772	23.5854	18.5516	38.5107	27.6146
ENSG00000011105	10867	TSPAN9	tetraspanin 9	61.5047	65.5186	60.916	31.2639	26.4098	76.0481	52.8961	24.2409	17.696	16.9213	22.5463	20.5266
ENSG00000011114	55727	BTBD7	BTB domain containing 7	55.8088	46.9685	51.4024	53.3122	44.6409	23.7036	24.4812	18.8625	8.41742	13.6676	20.93	16.1841
ENSG00000011132	9546	APBA3	amyloid beta precursor protein binding family A member 3	6.23504	9.43122	9.4718	11.317	8.60693	15.4188	9.1006	7.19027	9.75087	6.56481	6.71609	8.76556
ENSG00000011143	54903	MKS1	MKS transition zone complex subunit 1	16.0882	14.8479	13.1085	15.7611	11.4734	12.7828	9.48041	8.25832	7.86181	4.65119	7.50569	8.20221
ENSG00000011198	51099	ABHD5	abhydrolase domain containing 5	11.9366	11.4267	9.24346	7.59635	9.651	10.0212	8.83304	8.86864	7.63957	8.5746	9.26466	7.69772
ENSG00000011201	3730	ANOS1	anosmin 1	47.744	73.303	45.179	24.6149	71.4593	70.6923	59.8807	61.0505	29.0859	45.5194	40.8512	31.256
ENSG00000011243	26993	AKAP8L	A-kinase anchoring protein 8 like	67.3789	52.3068	75.2448	84.8001	66.5542	67.052	53.8483	41.139	25.6967	35.4486	44.4824	49.2004
ENSG00000011258	54799	MBTD1	mbt domain containing 1	66.6833	69.9964	69.7274	83.8699	70.5524	17.4272	13.581	11.348	5.13935	11.8122	12.9338	11.7426
ENSG00000011260	51096	UTP18	UTP18 small subunit processome component	40.4587	34.4297	34.2366	31.0572	28.7092	18.7662	19.5876	23.4399	34.9198	19.0855	21.8966	22.0525
ENSG00000011275	54476	RNF216	ring finger protein 216	54.2548	56.2467	61.5494	52.9677	59.0364	55.5036	59.642	54.8711	24.3633	36.7357	49.7275	51.6889
ENSG00000011295	54902	TTC19	tetratricopeptide repeat domain 19	65.5859	65.5378	59.9458	55.0348	59.8994	64.0812	57.9693	80.0847	82.6462	56.4653	63.0271	69.4284
ENSG00000011304	5725	PTBP1	polypyrimidine tract binding protein 1	182.409	150.242	136.007	126.52	89.4958	125.464	74.6154	40.9102	31.0861	27.5058	32.3425	34.9992
ENSG00000011332	8193	DPF1	double PHD fingers 1	151.765	126.224	147.094	102.887	78.6647	33.2854	59.5261	69.2898	62.4222	52.5228	45.0545	46.4499
ENSG00000011347	9066	SYT7	synaptotagmin 7	36.5148	46.069	65.2443	32.4008	43.1876	38.2228	100.858	210.349	104.259	149.067	165.851	166.684
ENSG00000011376	23395	LARS2	leucyl-tRNA synthetase 2, mitochondrial	38.038	30.0978	35.7495	28.0944	31.063	46.0473	53.6356	43.0463	22.8076	50.7608	43.0763	45.2658
ENSG00000011405	5286	PIK3C2A	phosphatidylinositol-4-phosphate 3-kinase catalytic subunit type 2 alpha	38.2809	53.3981	44.0624	40.5311	59.4959	41.9886	52.0211	48.4628	24.8633	50.2044	72.2986	55.8645
ENSG00000011422	5329	PLAUR	plasminogen activator, urokinase receptor	3.21735	2.35944	3.59759	4.53025	3.97852	14.6238	6.32315	2.91807	2.08352	1.92602	1.21698	1.99844
ENSG00000011426	54443	ANLN	anillin actin binding protein	43.5128	22.1333	29.2941	45.0786	19.5435	3.45198	10.0805	92.558	49.9211	202.163	164.056	162.85
ENSG00000011451	58525	WIZ	WIZ zinc finger	162.5	173.049	188.848	156.457	179.519	161.113	169.717	111.669	64.3113	88.3022	82.3309	89.7888
ENSG00000011454	2844	GPR21	G protein-coupled receptor 21	145.975	115.031	138.135	117.252	137.353	100.986	104.149	138.98	72.812	117.703	134.646	123.882
ENSG00000011465	1634	DCN	decorin	17.5379	13.1183	14.8305	18.6205	57.7842	80.5252	112.422	52.0865	95.4807	72.6137	47.9178	70.783
ENSG00000011478	54814	QPCTL	glutaminyl-peptide cyclotransferase like	3.76831	3.77999	5.89724	7.32074	7.69267	22.4901	8.10439	9.44081	19.8073	8.55036	9.90405	8.94583
ENSG00000011485	5536	PPP5C	protein phosphatase 5 catalytic subunit	91.6623	93.1131	94.5738	81.665	92.4186	73.7467	78.2973	119.831	92.5916	80.7129	75.1572	76.5101
ENSG00000011523	23177	CEP68	centrosomal protein 68	66.988	75.2147	85.317	91.449	94.9297	50.7336	56.3713	87.2941	38.2534	54.1787	61.6664	59.1126
ENSG00000011566	8491	MAP4K3	mitogen-activated protein kinase kinase kinase kinase 3	40.9726	50.2454	48.22	45.8365	48.3472	34.708	36.1646	49.7597	32.864	43.1878	40.6586	32.3133
ENSG00000011590	27033	ZBTB32	zinc finger and BTB domain containing 32	0	0	0	0	0	0.439342	0.557935	0	0.416704	0	0.560026	0
ENSG00000011600	7305	TYROBP	TYRO protein tyrosine kinase binding protein	1.35876	3.07557	1.60167	1.7053	6.01719	43.2857	12.1713	16.8409	33.1418	20.9335	6.03618	9.97942
ENSG00000011638	57146	TMEM159	transmembrane protein 159	25.367	19.398	27.5181	20.6876	25.9269	10.5233	11.1035	5.62634	16.6959	9.27906	9.06027	9.04779
ENSG00000011677	2556	GABRA3	gamma-aminobutyric acid type A receptor alpha3 subunit	129.444	138.03	113.676	40.4277	63.707	39.3107	48.41	119.984	36.1977	77.8243	79.547	65.0981
ENSG00000012048	672	BRCA1	BRCA1 DNA repair associated	33.3701	16.8596	19.7132	20.5153	6.42251	2.53145	3.13617	3.98612	1.80572	3.48767	5.52989	5.14648
ENSG00000012061	2067	ERCC1	ERCC excision repair 1, endonuclease non-catalytic subunit	51.9055	58.0096	42.3881	40.9789	49.2079	66.3825	39.1688	37.1338	65.9225	53.5068	37.5654	39.475
ENSG00000012124	933	CD22	CD22 molecule	0	0	0	0	0	0.648553	3.572	11.3862	13.6957	10.7093	26.4537	29.1709
ENSG00000012171	7869	SEMA3B	semaphorin 3B	1.91133	3.69118	4.20098	14.3831	7.84339	20.6491	22.5091	54.4134	80.6461	118.41	80.7741	132.287
ENSG00000012174	51360	MBTPS2	membrane bound transcription factor peptidase, site 2	31.2328	36.3587	29.5189	17.3803	26.5041	17.0088	18.6735	22.3718	11.5844	20.9494	17.234	17.6997
ENSG00000012211	4007	PRICKLE3	prickle planar cell polarity protein 3	0	0	0.413978	0.809588	0.659019	5.04198	2.16232	1.04898	1.36123	0.879565	1.14302	1.53428
ENSG00000012223	4057	LTF	lactotransferrin	0	0	0	0	0.574475	2.53145	1.31901	0.743821	1.02787	0.970646	1.48148	0.783743
ENSG00000012232	2137	EXTL3	exostosin like glycosyltransferase 3	229.418	192.952	194.52	125.796	166.542	93.0778	148.057	213.515	64.2557	100.744	133.734	129.075
ENSG00000012504	9971	NR1H4	nuclear receptor subfamily 1 group H member 4	0	0	0	0	0.801491	0	0.468798	0.553098	0	0	0	0
ENSG00000012660	60481	ELOVL5	ELOVL fatty acid elongase 5	113.021	102.265	102.712	59.72	89.5241	78.977	101.528	73.7146	90.8136	110.979	122.752	93.8395
ENSG00000012779	240	ALOX5	arachidonate 5-lipoxygenase	0	0.580865	0	0.740687	1.1072	8.97514	1.93174	2.99436	2.2502	4.57087	2.5995	2.91761
ENSG00000012817	8284	KDM5D	lysine demethylase 5D	44.8904	0	9.74878	0	43.4453	35.7959	35.1983	0	13.1956	24.0369	0	0.892221
ENSG00000012822	57658	CALCOCO1	calcium binding and coiled-coil domain 1	68.3483	68.3122	88.2546	124.763	111.153	121.07	82.2552	94.923	67.8671	107.114	98.7899	113.992
ENSG00000012963	55148	UBR7	ubiquitin protein ligase E3 component n-recognin 7 (putative)	96.3891	92.4606	73.9965	60.5469	69.4673	53.1604	56.6675	68.8321	75.3123	70.2191	66.5224	66.5905
ENSG00000012983	11183	MAP4K5	mitogen-activated protein kinase kinase kinase kinase 5	29.3501	37.0294	44.9064	65.6111	52.1811	25.4609	30.4595	23.9739	11.751	22.6422	34.8908	29.061
ENSG00000013016	30845	EHD3	EH domain containing 3	16.8445	20.3004	17.7523	16.519	24.8546	37.0512	103.713	199.249	90.3692	200.426	169.938	151.01
ENSG00000013275	5704	PSMC4	proteasome 26S subunit, ATPase 4	101.277	87.6688	87.1671	67.0925	76.4578	59.2275	66.8654	83.3652	89.758	96.4904	74.8078	76.4425
ENSG00000013288	23324	MAN2B2	mannosidase alpha class 2B member 2	18.9677	22.3172	25.9912	26.4408	41.9681	38.7667	56.1618	78.9785	22.9187	52.8332	53.9774	56.3837
ENSG00000013293	57709	SLC7A14	solute carrier family 7 member 14	8.25375	8.17458	9.19095	3.56563	6.71331	12.5736	25.3885	112.775	27.9192	62.96	62.2492	66.0589
ENSG00000013297	5010	CLDN11	claudin 11	4.47127	2.70847	1.25544	0.91294	3.51549	29.7707	59.5579	191.582	218.881	218.649	185.199	189.041
ENSG00000013306	51629	SLC25A39	solute carrier family 25 member 39	62.2557	65.6962	50.3337	39.7732	44.8349	197.934	71.5252	52.9257	79.4237	56.3981	52.0401	60.6655
ENSG00000013364	9961	MVP	major vault protein	2.90103	3.60401	2.73345	5.28816	8.03147	65.3365	19.6186	17.7945	19.3073	23.8924	18.344	30.6295
ENSG00000013374	51667	NUB1	negative regulator of ubiquitin like proteins 1	41.3996	39.0505	44.4762	49.4193	45.9746	30.6912	28.8337	30.7637	31.475	34.9486	37.4438	35.1021
ENSG00000013375	5238	PGM3	phosphoglucomutase 3	28.0782	26.379	26.1021	27.5777	28.783	28.2225	18.6763	14.6666	16.6959	13.075	17.841	15.8916
ENSG00000013392	112611	RWDD2A	RWD domain containing 2A	14.3808	18.6569	17.3151	16.0712	17.516	11.4857	14.35	22.2956	33.9752	21.9542	21.0961	22.2802
ENSG00000013441	1195	CLK1	CDC like kinase 1	72.3522	55.3321	90.0479	221.982	82.87	69.9391	53.2282	25.8049	31.1972	40.6611	58.8647	54.4192
ENSG00000013503	55703	POLR3B	RNA polymerase III subunit B	29.4255	23.9538	24.459	18.9306	22.1882	5.83698	10.9715	17.1842	11.0288	17.7113	13.3183	14.3505
ENSG00000013523	23357	ANGEL1	angel homolog 1	16.5001	13.3194	16.5004	24.236	15.543	35.7959	31.4194	32.4802	26.1968	45.1129	43.2289	47.1971
ENSG00000013561	9604	RNF14	ring finger protein 14	43.3939	56.375	43.9976	41.289	49.2712	39.3525	43.8292	67.5351	94.8696	90.7664	66.5577	67.0199
ENSG00000013563	1774	DNASE1L1	deoxyribonuclease 1 like 1	2.31613	2.2128	2.0575	2.87662	3.94298	10.9417	5.90185	6.6181	5.75051	4.5696	4.39788	7.90287
ENSG00000013573	1663	DDX11	DEAD/H-box helicase 11	18.207	12.1615	11.8308	25.0628	8.91727	14.038	10.8274	1.69744	0.972309	3.50749	1.18713	3.57659
ENSG00000013583	50865	HEBP1	heme binding protein 1	14.94	13.1972	13.1885	14.3142	21.6987	31.9046	23.3	21.5708	36.3088	23.1119	31.3125	35.9703
ENSG00000013588	9052	GPRC5A	G protein-coupled receptor class C group 5 member A	0	0	0	0	0.901331	8.13829	1.4996	0.629387	0	0.871576	0.694569	0.45372
ENSG00000013619	10046	MAMLD1	mastermind like domain containing 1	37.4635	31.4802	32.1432	17.9315	28.6443	40.3567	59.9412	37.7441	21.9742	36.9309	48.0361	45.0832
ENSG00000013725	923	CD6	CD6 molecule	0.520987	0.927921	0.558591	0	0.491574	1.65276	3.62946	2.84178	2.63912	3.04544	1.89233	2.59369
ENSG00000013810	10460	TACC3	transforming acidic coiled-coil containing protein 3	80.9478	47.2475	42.7787	46.7322	13.1369	8.05461	4.93902	4.36756	2.86137	3.07283	2.20982	3.1024
ENSG00000014123	23376	UFL1	UFM1 specific ligase 1	26.1135	17.6508	17.8978	17.9315	19.8071	22.0299	23.834	32.9379	15.807	40.1043	33.8369	27.6771
ENSG00000014138	23649	POLA2	DNA polymerase alpha 2, accessory subunit	37.4578	24.5831	20.942	15.2099	9.1117	5.04198	7.0347	10.28	9.86199	11.5023	8.12785	9.54699
ENSG00000014164	23144	ZC3H3	zinc finger CCCH-type containing 3	35.7715	36.1973	34.7889	29.0246	31.725	35.6704	32.6259	22.9822	13.1401	22.7019	21.4558	23.0449
ENSG00000014216	823	CAPN1	calpain 1	84.5852	108.177	111.471	111.293	161.115	120.484	110.198	118.763	84.9242	93.1318	98.7295	98.7179
ENSG00000014257	55	ACPP	acid phosphatase, prostate	0	0	0	0	0.907132	0.481184	0	0	0	0	0	0
ENSG00000014641	4190	MDH1	malate dehydrogenase 1	171.697	151.2	128.894	99.9583	126.203	157.557	206.322	428.079	632.195	402.095	454.703	476.616
ENSG00000014824	10463	SLC30A9	solute carrier family 30 member 9	128.818	135.87	127.79	118.941	134.551	60.1899	97.0566	152.178	153.43	168.105	136.774	129.435
ENSG00000014914	10903	MTMR11	myotubularin related protein 11	4.24882	6.49149	5.92202	8.35426	8.73037	34.2478	7.97189	5.96964	6.195	5.76584	6.25734	7.24762
ENSG00000014919	1355	COX15	cytochrome c oxidase assembly homolog COX15	25.7066	18.7275	22.1936	17.1392	21.7012	22.532	11.8695	10.8522	8.25073	13.8253	16.5184	16.103
ENSG00000015133	440193	CCDC88C	coiled-coil domain containing 88C	50.8698	56.5409	91.184	64.8187	48.9676	33.4109	38.2434	19.6636	4.02814	5.91806	18.2592	15.3648
ENSG00000015153	10138	YAF2	YY1 associated factor 2	27.7775	24.3939	23.6281	24.0982	25.0179	20.8583	25.5548	31.4503	52.1991	33.6848	29.5866	26.8025
ENSG00000015171	10771	ZMYND11	zinc finger MYND-type containing 11	145.214	168.199	185.254	160.729	198.256	114.417	158.772	189.407	105.148	196.46	187.791	159.347
ENSG00000015285	7454	WAS	WASP actin nucleation promoting factor	0.749887	0.814996	0.927908	1.2919	2.34745	7.97092	2.60708	3.07065	3.86145	4.51532	1.85432	2.79231
ENSG00000015413	1800	DPEP1	dipeptidase 1	8.92979	6.73442	4.92548	3.60008	3.18434	6.54829	0.7732	0	0	0	0	0
ENSG00000015475	637	BID	BH3 interacting domain death agonist	37.1062	48.9817	44.8804	40.1866	44.0967	51.4031	53.6967	58.7237	130.262	47.9575	44.3206	50.6954
ENSG00000015479	9782	MATR3	matrin 3	1395.45	1180.33	1071.91	908.72	952.253	348.147	422.854	585.044	512.073	547.787	544.946	495.22
ENSG00000015520	29881	NPC1L1	NPC1 like intracellular cholesterol transporter 1	0	0	0	0	0	0.481184	0	0	0	0	0	0
ENSG00000015532	64132	XYLT2	xylosyltransferase 2	9.05742	10.8374	11.6392	8.97437	11.3663	34.457	28.8458	24.0884	15.418	18.4277	21.1492	22.9453
ENSG00000015568	84220	RGPD5	RANBP2 like and GRIP domain containing 5	1.57201	0.760564	1.09481	0.706236	0.815265	0.439342	0	1.73558	1.19455	1.16385	1.41542	0.725581
ENSG00000015592	81551	STMN4	stathmin 4	419.808	348.85	423.555	286.853	264.442	162.954	177.55	316.963	247.161	277.56	249.535	222.476
ENSG00000015676	23386	NUDCD3	NudC domain containing 3	236.464	240.295	232.021	169.548	208.184	187.934	244.017	406.985	256.051	319.492	302.694	307.896
ENSG00000016082	3670	ISL1	ISL LIM homeobox 1	47.5103	10.5496	7.25125	3.49673	0	0	0	0	0	0	0.407271	0.424152
ENSG00000016391	55349	CHDH	choline dehydrogenase	5.04943	7.40939	6.93449	5.70157	11.9047	34.6662	32.5867	19.8924	18.585	22.3195	32.9545	26.9046
ENSG00000016402	53832	IL20RA	interleukin 20 receptor subunit alpha	0	0	0	0	0.411216	1.65276	2.17316	1.16341	3.08361	2.65577	3.59062	3.30048
ENSG00000016602	22802	CLCA4	chloride channel accessory 4	0	0	0	0	0	0	0	3.07065	2.63912	9.219	6.81901	6.90875
ENSG00000016864	55830	GLT8D1	glycosyltransferase 8 domain containing 1	41.9202	47.0085	39.5752	44.0106	48.8434	54.8759	36.7795	34.7689	40.8092	26.2252	36.5328	37.3756
ENSG00000017260	27032	ATP2C1	ATPase secretory pathway Ca2+ transporting 1	158.634	147.598	172.27	146.57	174.876	87.722	127.76	200.012	102.87	158.88	151.945	142.344
ENSG00000017373	---	---	---	72.8385	83.1552	124.368	103.162	114.281	78.5586	187.283	293.085	131.262	207.651	209.536	208.657
ENSG00000017427	3479	IGF1	insulin like growth factor 1	1.60249	3.37456	2.92934	3.11778	5.43922	6.46461	9.4707	11.348	5.02823	7.12624	5.399	5.30269
ENSG00000017483	92745	SLC38A5	solute carrier family 38 member 5	54.2038	43.9394	35.3497	28.2667	51.1698	51.947	58.2326	30.8018	56.4217	19.6222	24.7903	32.8164
ENSG00000017621	---	---	---	2.0783	3.02676	2.17241	1.7742	2.04972	5.00013	7.0292	6.04593	13.9735	8.86803	5.86356	5.85213
ENSG00000017797	10928	RALBP1	ralA binding protein 1	66.2588	55.9056	64.2205	77.3587	62.4297	42.9928	48.9103	70.663	36.3088	73.2109	74.1992	67.1585
ENSG00000018189	22902	RUFY3	RUN and FYVE domain containing 3	417.565	431.637	369.958	290.952	409.676	168.77	188.861	250.744	241.494	272.478	256.238	230.945
ENSG00000018236	1272	CNTN1	contactin 1	124.199	189.793	222.763	94.8252	159.439	179.649	346.529	755.627	461.235	485.875	446.454	375.682
ENSG00000018280	6556	SLC11A1	solute carrier family 11 member 1	0	0	0	0.568434	1.06285	32.1557	1.07758	1.16341	1.86128	2.12688	0.821812	1.31388
ENSG00000018408	25937	WWTR1	WW domain containing transcription regulator 1	30.7939	17.1675	19.3466	30.9194	16.1973	57.6375	33.3435	19.1677	15.9181	15.6625	18.7201	20.8651
ENSG00000018510	8540	AGPS	alkylglycerone phosphate synthase	63.4301	58.3175	53.8441	40.4622	56.7337	35.3775	45.5826	61.3557	37.2533	53.2423	49.4807	38.4672
ENSG00000018607	---	---	---	0.427677	0.478482	0	0	0.481715	0	0.469943	0.438664	0.472264	0.472085	0.498597	0.532982
ENSG00000018610	63932	CXorf56	chromosome X open reading frame 56	11.4941	12.1898	12.7861	17.587	15.5084	10.9417	11.7932	16.0017	24.53	18.3657	18.5053	18.1581
ENSG00000018625	477	ATP1A2	ATPase Na+/K+ transporting subunit alpha 2	208.96	164.598	207.094	173.82	429.804	1667.3	1525.89	853.125	281.164	976.726	1243.75	1004.57
ENSG00000018699	55622	TTC27	tetratricopeptide repeat domain 27	25.4673	19.295	22.0408	16.4157	21.4853	9.26803	6.16287	7.7243	2.80581	5.99293	5.74579	6.05242
ENSG00000018869	147948	ZNF582	zinc finger protein 582	3.26072	4.51799	4.8929	4.59915	4.23454	2.44776	3.85478	4.06241	5.19491	2.90101	3.8612	4.23197
ENSG00000019102	23584	VSIG2	V-set and immunoglobulin domain containing 2	0	0.436616	0.499732	0.568434	0.831976	1.77829	2.9799	2.38404	1.63903	1.28614	2.0407	1.71588
ENSG00000019144	23187	PHLDB1	pleckstrin homology like domain family B member 1	95.9764	83.2843	117.106	162.004	110.663	139.397	128.972	118.916	70.5341	147.822	176.045	201.101
ENSG00000019169	8685	MARCO	macrophage receptor with collagenous structure	0	0	0	0	0	0.690395	1.66342	0.400519	0	0	0	0.866898
ENSG00000019186	1591	CYP24A1	cytochrome P450 family 24 subfamily A member 1	0	0.49351	0	0	0	0	1.46992	1.583	0.638946	0.739326	1.33424	0.751181
ENSG00000019485	56981	PRDM11	PR/SET domain 11	4.80046	3.90329	4.74322	4.28909	5.0026	4.87461	9.48022	13.5223	12.2511	16.4773	11.9979	13.9481
ENSG00000019505	57586	SYT13	synaptotagmin 13	248.898	229.294	221.763	159.833	173.462	80.3578	126.37	254.177	156.486	247.559	227.761	147.983
ENSG00000019549	6591	SNAI2	snail family transcriptional repressor 2	6.55981	3.37747	5.38423	5.80492	4.41994	3.20092	1.72218	1.62115	0.916748	0.712241	0.93684	1.00973
ENSG00000019582	972	CD74	CD74 molecule	3.14803	3.2623	2.8368	3.56563	19.9663	270.614	39.7711	176.286	111.427	131.707	73.8643	144.139
ENSG00000019991	3082	HGF	hepatocyte growth factor	0.822828	0.647755	1.59123	0.809588	4.18981	7.63619	3.85934	5.09231	4.25038	3.90092	4.17823	3.18869
ENSG00000019995	54764	ZRANB1	zinc finger RANBP2-type containing 1	106.552	101.22	106.945	104.644	98.56	47.7628	53.8259	64.3691	37.9756	62.1336	69.7617	61.5347
ENSG00000020129	23154	NCDN	neurochondrin	104.785	172.321	157.913	98.8903	162.572	200.068	448	1160.42	405.897	478.427	941.449	880.404
ENSG00000020181	25960	ADGRA2	adhesion G protein-coupled receptor A2	14.3014	7.92897	9.63489	7.11404	13.0582	80.2741	50.8779	19.5491	6.97284	10.954	11.4704	17.1508
ENSG00000020256	55734	ZFP64	ZFP64 zinc finger protein	37.5686	33.4662	36.2899	26.5786	31.9529	17.4691	16.2775	21.609	14.1401	14.4013	17.6669	14.8639
ENSG00000020426	4331	MNAT1	MNAT1 component of CDK activating kinase	12.1762	9.58001	9.74647	11.2826	7.90416	9.72829	7.51958	5.74077	12.64	5.6423	8.61868	8.4722
ENSG00000020577	23034	SAMD4A	sterile alpha motif domain containing 4A	30.2481	27.1763	25.132	19.9296	16.7308	58.3907	65.9201	86.8745	39.9202	55.6545	60.8025	56.7965
ENSG00000020633	864	RUNX3	RUNX family transcription factor 3	0	0	0	0	0	2.74066	1.47417	0.476808	0.527825	0	0.537389	0.697534
ENSG00000020922	4361	MRE11	MRE11 homolog, double strand break repair nuclease	13.4649	8.0314	11.1784	11.0759	7.84853	3.45198	4.97376	6.57996	2.69468	3.09975	5.70783	5.21694
ENSG00000021300	58473	PLEKHB1	pleckstrin homology domain containing B1	5.83666	14.059	9.53755	9.42223	25.4659	218.981	276.688	330.924	742.427	1053.87	612.253	933.197
ENSG00000021355	1992	SERPINB1	serpin family B member 1	2.80917	2.12802	1.81336	2.32541	3.94151	16.9251	6.12787	7.60986	11.751	7.1633	7.46111	10.7266
ENSG00000021488	11136	SLC7A9	solute carrier family 7 member 9	0	0	0.510816	1.7053	0.407068	0	0.682002	0	0	0	0.541619	0
ENSG00000021574	6683	SPAST	spastin	124.105	129.558	129.769	114.91	131.501	23.578	35.2072	49.836	43.9761	47.6483	45.8634	37.6223
ENSG00000021645	9369	NRXN3	neurexin 3	112.862	74.0693	71.5503	83.7321	69.4679	35.0428	72.7367	188.454	71.5341	126.158	134.108	116.849
ENSG00000021762	114879	OSBPL5	oxysterol binding protein like 5	33.4458	38.1851	51.4267	56.7917	49.9241	47.1352	40.6469	24.5079	14.2513	17.4411	18.3233	20.6824
ENSG00000021776	9716	AQR	aquarius intron-binding spliceosomal factor	68.3932	44.7737	55.5323	42.2192	47.7487	30.3565	22.8161	24.5461	5.69495	23.1353	21.1577	18.0864
ENSG00000021826	1373	CPS1	carbamoyl-phosphate synthase 1	1.34097	0.864005	0.921413	0.706236	1.04144	1.69461	1.63364	2.91807	1.91684	7.25055	5.9954	7.33539
ENSG00000022267	2273	FHL1	four and a half LIM domains 1	244.753	235.281	213.781	164.967	258.973	498.612	267.344	206.572	191.156	176.239	220.981	241.9
ENSG00000022277	51507	RTF2	replication termination factor 2	93.0763	89.479	80.2052	73.328	77.6191	85.0023	72.3035	72.2269	111.482	106.282	93.5091	98.144
ENSG00000022355	2554	GABRA1	gamma-aminobutyric acid type A receptor alpha1 subunit	10.09	20.4752	10.8579	8.45761	14.8836	35.0846	67.1058	283.815	202.601	249.977	145.797	144.775
ENSG00000022556	55655	NLRP2	NLR family pyrin domain containing 2	3.90312	8.2835	9.25921	16.1745	3.54172	1.02513	4.68091	5.77892	1.19455	7.49157	4.26559	5.59599
ENSG00000022567	57210	SLC45A4	solute carrier family 45 member 4	8.26287	9.91327	11.5923	11.9027	9.62117	9.64461	28.3323	43.9617	14.3068	30.3422	33.0538	31.8459
ENSG00000022840	9921	RNF10	ring finger protein 10	234.909	218.232	237.56	221.913	239.419	218.353	180.509	212.18	161.431	202.45	211.037	210.117
ENSG00000022976	55778	ZNF839	zinc finger protein 839	12.3514	18.0326	17.0658	23.8226	19.6528	16.0883	23.2233	24.9275	22.1409	19.8409	24.7301	23.3386
ENSG00000023041	64429	ZDHHC6	zinc finger DHHC-type containing 6	26.0093	30.8458	28.8299	30.4715	30.7749	23.0759	19.928	18.71	24.8633	27.4435	25.6229	22.848
ENSG00000023171	57476	GRAMD1B	GRAM domain containing 1B	75.8811	100.617	114.75	98.7525	146.709	101.07	137.225	223.242	79.5349	107.596	166.894	138.902
ENSG00000023191	6050	RNH1	ribonuclease/angiogenin inhibitor 1	80.1787	90.1179	74.9989	63.6819	78.7411	174.837	96.2926	101.903	141.096	111.034	114.982	146.141
ENSG00000023228	4719	NDUFS1	NADH:ubiquinone oxidoreductase core subunit S1	82.8619	61.9038	81.9051	65.2666	70.1012	64.6252	81.1319	128.643	69.8118	88.7123	101.198	90.6732
ENSG00000023287	9821	RB1CC1	RB1 inducible coiled-coil 1	132.822	138.365	146.934	138.853	135.215	46.2146	82.7622	137.988	76.7568	126.952	125.242	107.168
ENSG00000023318	23071	ERP44	endoplasmic reticulum protein 44	38.0165	31.9769	34.0658	31.0572	31.0981	32.4486	24.087	26.9492	19.3628	31.3338	23.0372	21.8137
ENSG00000023330	211	ALAS1	5'-aminolevulinate synthase 1	61.0169	57.4047	58.9341	38.9119	57.769	39.9802	45.1798	56.0536	45.5318	58.9847	49.4378	51.2359
ENSG00000023445	330	BIRC3	baculoviral IAP repeat containing 3	0	0.594346	0.672565	0.671786	0.873474	0.98329	2.87937	4.59643	2.02796	4.61423	2.8206	4.26226
ENSG00000023516	11215	AKAP11	A-kinase anchoring protein 11	165.957	152.422	191.631	131.171	176.633	90.4418	150.077	362.966	161.764	339.457	297.902	247.286
ENSG00000023572	51022	GLRX2	glutaredoxin 2	3.0115	4.02593	3.93295	4.22019	4.29971	3.0754	5.49247	8.52533	29.4193	13.5066	7.34135	9.10303
ENSG00000023608	6617	SNAPC1	small nuclear RNA activating complex polypeptide 1	6.48204	4.35948	4.39219	6.49393	3.1933	3.53566	1.85755	2.04074	2.30576	2.70207	2.21705	2.58346
ENSG00000023697	51071	DERA	deoxyribose-phosphate aldolase	26.2249	26.5853	17.6778	18.0004	14.7995	31.1096	15.9402	11.9584	32.4196	16.6976	12.4422	12.2594
ENSG00000023734	11171	STRAP	serine/threonine kinase receptor associated protein	172.924	168.485	153.998	116.15	139.056	97.5968	104.856	152.064	184.266	170.79	134.562	135.988
ENSG00000023839	1244	ABCC2	ATP binding cassette subfamily C member 2	0	0	0	0.775138	0	0.439342	0	0	0	0	0	0
ENSG00000023892	50619	DEF6	DEF6 guanine nucleotide exchange factor	0.704968	0.681392	0.699847	1.11964	1.62355	7.42698	4.13717	4.10055	3.36141	2.13142	2.15012	3.1445
ENSG00000023902	51177	PLEKHO1	pleckstrin homology domain containing O1	144.051	157.539	135.585	156.457	110.062	125.422	71.6268	55.5959	109.982	51.6912	51.9913	53.9826
ENSG00000023909	2730	GCLM	glutamate-cysteine ligase modifier subunit	10.3826	10.2082	10.005	7.7686	9.63936	16.6741	11.6974	15.3532	14.2513	15.3581	15.1656	15.1142
ENSG00000024048	23304	UBR2	ubiquitin protein ligase E3 component n-recognin 2	39.1901	37.778	42.2386	42.4603	44.4231	31.1933	33.9437	42.4741	18.5294	36.9452	45.8292	38.6094
ENSG00000024422	30846	EHD2	EH domain containing 2	6.01646	3.98153	3.98896	3.35893	9.11327	191.825	42.3243	28.0554	16.8071	24.5064	24.1812	27.4416
ENSG00000024526	55635	DEPDC1	DEP domain containing 1	12.8411	7.83896	6.55375	6.52838	2.24514	0.606711	0	0.591242	0	0	0	0
ENSG00000024862	25901	CCDC28A	coiled-coil domain containing 28A	5.53043	5.26042	5.28849	9.24998	5.89363	12.8665	12.1404	20.5028	54.3659	23.1514	30.3868	31.937
ENSG00000025039	58528	RRAGD	Ras related GTP binding D	34.6897	42.0049	41.9171	28.9557	43.6156	70.5667	36.7926	54.6422	58.3663	52.9133	55.3624	43.0777
ENSG00000025156	3298	HSF2	heat shock transcription factor 2	74.2246	73.341	63.0322	55.5515	55.2189	15.4607	18.5545	19.6636	17.1404	19.0219	19.3558	18.8323
ENSG00000025293	51230	PHF20	PHD finger protein 20	124.78	99.96	130.768	101.302	109.022	36.8001	39.1416	59.5629	23.3076	38.8876	54.2396	45.6672
ENSG00000025423	8630	HSD17B6	hydroxysteroid 17-beta dehydrogenase 6	0.66294	0.529279	0.746565	0.844039	1.73279	23.4944	21.4396	12.4924	16.4181	15.5627	20.7066	15.9447
ENSG00000025434	10062	NR1H3	nuclear receptor subfamily 1 group H member 3	4.89051	5.86034	5.71893	6.21833	7.4052	18.5151	10.039	7.53357	17.4182	12.3457	9.01172	10.2365
ENSG00000025708	1890	TYMP	thymidine phosphorylase	0	1.22701	0.57559	1.80865	2.20107	39.8965	5.35884	3.98612	3.91702	4.49159	2.04902	3.07023
ENSG00000025770	29781	NCAPH2	non-SMC condensin II complex subunit H2	77.8575	78.8378	67.1109	85.868	65.3813	62.9933	49.9671	49.9504	72.9232	35.4463	38.0573	48.19
ENSG00000025772	10953	TOMM34	translocase of outer mitochondrial membrane 34	17.5899	19.6182	18.5477	15.2444	21.0598	28.1807	46.5122	90.5745	64.4224	54.0723	88.7941	83.0749
ENSG00000025796	11231	SEC63	SEC63 homolog, protein translocation regulator	98.5016	97.2977	114.332	95.6175	108.913	59.3949	56.5226	73.7527	62.1444	86.869	83.3162	68.2079
ENSG00000025800	23633	KPNA6	karyopherin subunit alpha 6	104.597	82.6731	85.1966	62.7861	79.3236	57.3865	60.9269	100.568	25.7523	73.9926	97.0696	74.3208
ENSG00000026025	7431	VIM	vimentin	935.971	603.581	433.855	263.288	432.588	963.31	195.496	126.316	158.82	129.532	127.119	147.489
ENSG00000026036	100533107	RTEL1-TNFRSF6B	RTEL1-TNFRSF6B readthrough (NMD candidate)	0	0	0.767904	1.8431	0.588865	2.07119	2.13368	0.743821	0.861188	0	1.17634	1.62192
ENSG00000026103	355	FAS	Fas cell surface death receptor	0.526605	1.11667	1.0418	1.6364	0.950593	6.38092	3.71371	2.49848	6.41724	3.64157	4.32839	3.96524
ENSG00000026297	8635	RNASET2	ribonuclease T2	8.10094	10.4625	7.74104	10.7313	9.44514	64.667	22.1172	16.1161	24.3633	23.1373	17.0414	21.6378
ENSG00000026508	960	CD44	CD44 molecule (Indian blood group)	6.31349	5.44612	4.93294	7.7686	14.2756	144.962	13.218	15.4677	17.8071	10.9541	13.9088	13.5127
ENSG00000026559	3755	KCNG1	potassium voltage-gated channel modifier subfamily G member 1	27.8787	57.8648	54.1121	26.0274	51.48	32.9088	53.5592	55.3288	49.1988	33.4747	45.8464	39.7244
ENSG00000026652	56895	AGPAT4	1-acylglycerol-3-phosphate O-acyltransferase 4	60.4218	57.6052	68.1393	87.7628	71.2287	37.6788	53.5673	91.9477	40.1425	69.7241	83.3367	88.5983
ENSG00000026950	11119	BTN3A1	butyrophilin subfamily 3 member A1	15.2834	20.6108	19.8088	17.2425	21.3758	28.8083	13.1652	7.80058	5.41715	13.224	8.29738	10.8345
ENSG00000027001	4285	MIPEP	mitochondrial intermediate peptidase	11.7485	10.9467	10.1139	8.11311	10.1209	8.80777	8.45416	11.0047	8.75078	7.44131	9.99163	9.70327
ENSG00000027075	5583	PRKCH	protein kinase C eta	10.1001	5.7012	7.06372	3.46228	5.89042	36.6746	16.3403	10.2418	6.195	6.33677	9.49075	9.33569
ENSG00000027644	3645	INSRR	insulin receptor related receptor	0	0	0	0.465083	0	0	0	0	0	0	0	0
ENSG00000027697	3459	IFNGR1	interferon gamma receptor 1	27.7953	31.0573	24.496	30.4371	32.7963	52.5328	40.8793	38.8122	54.8104	48.706	33.3175	37.053
ENSG00000027847	11285	B4GALT7	beta-1,4-galactosyltransferase 7	16.7652	22.3541	16.9269	15.7956	16.9331	23.4525	22.0478	18.6718	19.474	18.9586	16.9079	19.831
ENSG00000027869	9047	SH2D2A	SH2 domain containing 2A	0	0.440101	0.645631	0	0.745098	0.815921	0.529915	0	0	0.409309	0	0.526015
ENSG00000028116	7444	VRK2	VRK serine/threonine kinase 2	3.40708	2.55416	2.95081	2.42876	2.86577	2.57329	1.70755	3.94797	1.75016	5.47241	4.3758	4.67115
ENSG00000028137	7133	TNFRSF1B	TNF receptor superfamily member 1B	5.06611	4.0637	2.80366	2.73882	6.85496	42.9928	11.7255	10.3944	4.58374	12.4261	4.76873	8.57082
ENSG00000028203	55591	VEZT	vezatin, adherens junctions transmembrane protein	115.366	97.3725	94.2881	90.9323	87.2539	44.8757	46.6317	62.233	39.8091	54.2232	55.9805	50.2665
ENSG00000028277	5452	POU2F2	POU class 2 homeobox 2	6.54767	9.2719	18.6095	22.0311	9.53515	7.71987	6.33232	4.36756	6.13944	2.47502	5.27845	4.32273
ENSG00000028310	65980	BRD9	bromodomain containing 9	62.813	66.1609	72.8564	77.1865	63.6936	39.3107	43.5799	40.9864	37.3644	45.2001	40.9257	42.6155
ENSG00000028528	6642	SNX1	sorting nexin 1	55.2199	51.1345	58.3766	65.1632	54.881	52.1981	69.1826	84.2425	64.0335	71.9691	79.3964	81.9308
ENSG00000028839	9519	TBPL1	TATA-box binding protein like 1	34.8342	42.0712	33.1203	32.8142	30.2363	22.2809	23.1688	37.0194	56.6995	36.3634	35.9699	31.2507
ENSG00000029153	56938	ARNTL2	aryl hydrocarbon receptor nuclear translocator like 2	7.52454	9.90543	9.73051	13.4185	8.1316	5.00013	9.63616	21.3038	11.0288	17.6841	15.561	10.4204
ENSG00000029363	9774	BCLAF1	BCL2 associated transcription factor 1	263.062	261.626	265.078	232.455	253.35	63.5791	109.908	132.305	84.8131	113.082	128.574	111.749
ENSG00000029364	55334	SLC39A9	solute carrier family 39 member 9	92.7864	98.1168	78.1264	66.1623	88.4999	89.3957	68.2008	84.7002	52.0324	82.7559	87.0694	73.5652
ENSG00000029534	286	ANK1	ankyrin 1	7.00061	7.33613	11.2838	4.46135	7.69768	22.7412	20.4664	17.5275	8.19517	9.56659	15.8683	14.8151
ENSG00000029559	3381	IBSP	integrin binding sialoprotein	0	0	0	0	0	0	0	0.82011	0	0	0	0
ENSG00000029639	51106	TFB1M	transcription factor B1, mitochondrial	6.4524	3.84775	5.45046	5.04701	4.0575	5.25119	3.56927	5.24489	5.13935	5.73697	5.22303	5.90393
ENSG00000029725	9135	RABEP1	rabaptin, RAB GTPase binding effector protein 1	195.259	193.933	186.791	154.528	167.15	71.4454	127.386	187.424	120.316	130.656	175.208	158.782
ENSG00000029993	3149	HMGB3	high mobility group box 3	271.736	224.414	207.244	177.92	153.29	21.2349	47.9918	22.5626	27.1969	27.0907	24.0395	22.9538
ENSG00000030066	23279	NUP160	nucleoporin 160	110.938	79.4498	87.2125	79.6669	77.9589	28.892	20.899	14.6666	9.19526	10.6265	14.1288	15.5069
ENSG00000030110	578	BAK1	BCL2 antagonist/killer 1	7.4501	8.21675	6.03073	6.11497	7.0582	12.448	11.3356	7.64801	12.14	7.92141	7.89967	7.73826
ENSG00000030304	4593	MUSK	muscle associated receptor tyrosine kinase	0	0	0	0	0	1.61092	0.696229	3.10879	0	0	0.652437	0
ENSG00000030419	22807	IKZF2	IKAROS family zinc finger 2	9.89747	10.3798	9.93264	8.35426	7.57931	9.05882	6.00613	5.32118	3.97258	7.17455	7.36379	5.46542
ENSG00000030582	2896	GRN	granulin precursor	40.2273	42.4863	32.9287	27.1987	55.4833	186.511	77.87	74.1342	51.4768	54.3055	59.9132	60.8305
ENSG00000031003	51306	FAM13B	family with sequence similarity 13 member B	37.5225	71.4899	72.4946	79.8047	98.9668	18.5151	38.3711	87.7518	35.9754	47.4339	63.0137	55.856
ENSG00000031081	57514	ARHGAP31	Rho GTPase activating protein 31	13.3539	12.1179	14.2796	12.3161	24.3255	68.2654	49.8477	31.0688	14.3624	32.4474	27.7173	23.553
ENSG00000031691	55166	CENPQ	centromere protein Q	14.3421	11.0373	7.44407	9.35333	4.56014	10.9836	3.78038	4.93973	11.0843	7.16077	6.04652	4.57096
ENSG00000031698	6301	SARS	seryl-tRNA synthetase	234.886	201.024	203.085	179.642	203.001	122.577	119.289	209.281	203.99	249.701	190.984	199.159
ENSG00000031823	8498	RANBP3	RAN binding protein 3	84.5621	82.7529	89.4897	81.2172	82.0478	73.0773	77.0925	70.8537	56.0883	58.7035	67.0609	67.8279
ENSG00000032219	5926	ARID4A	AT-rich interaction domain 4A	57.6592	60.9749	69.0706	62.0627	58.9842	24.4149	36.6953	46.0978	34.9198	30.9484	48.4433	30.6327
ENSG00000032389	7260	EIPR1	EARP complex and GARP complex interacting protein 1	66.0094	62.9165	53.5288	39.0842	43.9774	44.3736	48.1564	52.5824	72.4231	53.9951	54.6958	58.1775
ENSG00000032444	10908	PNPLA6	patatin like phospholipase domain containing 6	62.0312	69.5482	77.0673	60.3402	79.0589	111.656	134.956	154.696	120.427	143.217	148.753	156.924
ENSG00000032742	8100	IFT88	intraflagellar transport 88	12.8785	14.454	14.8001	22.9613	16.4618	12.1133	10.5435	11.5388	13.5845	15.3999	13.5984	13.6916
ENSG00000033011	56052	ALG1	ALG1 chitobiosyldiphosphodolichol beta-mannosyltransferase	5.64498	7.80597	7.6706	7.59635	8.30738	8.38935	8.51579	11.1955	8.52854	11.5052	8.96759	9.70342
ENSG00000033030	55596	ZCCHC8	zinc finger CCHC-type containing 8	26.6209	22.0915	23.0226	31.7806	23.1723	13.1593	9.829	7.64801	4.41706	6.19847	7.6881	8.63297
ENSG00000033050	10061	ABCF2	ATP binding cassette subfamily F member 2	52.5337	50.9763	53.1098	41.5301	48.5174	29.8125	40.3539	54.3752	29.2526	38.747	53.3937	51.8399
ENSG00000033100	54480	CHPF2	chondroitin polymerizing factor 2	20.0901	22.5672	20.2669	23.7881	25.399	27.8878	28.053	36.905	18.6961	25.8659	28.3209	28.4509
ENSG00000033122	57554	LRRC7	leucine rich repeat containing 7	31.5889	53.9451	78.476	100.957	92.604	28.348	62.8934	119.336	70.8119	70.8041	87.0312	67.6633
ENSG00000033170	2530	FUT8	fucosyltransferase 8	85.9578	80.4359	65.1575	63.9919	93.081	44.8338	46.7694	68.1073	43.7539	64.2377	60.5541	66.1325
ENSG00000033178	55236	UBA6	ubiquitin like modifier activating enzyme 6	58.133	62.3175	58.8496	62.8206	70.1297	30.6494	28.5978	38.0493	28.3636	28.4329	34.357	30.8404
ENSG00000033327	9846	GAB2	GRB2 associated binding protein 2	73.1626	60.0942	110.458	96.7544	105.688	82.8265	77.2535	95.4189	61.1999	127.771	114.031	128.863
ENSG00000033627	535	ATP6V0A1	ATPase H+ transporting V0 subunit a1	142.811	143.35	158.58	114.117	163.967	153.289	272.244	462.18	217.936	479.86	407.804	388.628
ENSG00000033800	8554	PIAS1	protein inhibitor of activated STAT 1	59.8618	38.1675	39.0675	27.5432	35.7436	19.3938	17.3185	29.6575	5.97275	27.4708	23.545	19.4641
ENSG00000033867	9497	SLC4A7	solute carrier family 4 member 7	31.5575	29.2909	31.9496	33.6754	27.428	11.1928	11.0153	13.8274	5.86163	8.68419	8.22403	7.10584
ENSG00000034053	321	APBA2	amyloid beta precursor protein binding family A member 2	225.487	252.666	235.89	183.225	233.507	176.093	221.387	322.532	186.267	181.977	218.582	216.197
ENSG00000034063	---	---	---	111.615	42.4145	50.8184	27.681	11.6214	4.16329	2.80053	0.858255	0	0.930064	0.898914	0.671605
ENSG00000034152	5606	MAP2K3	mitogen-activated protein kinase kinase 3	12.4916	13.2408	9.8848	8.52651	10.175	41.612	17.0663	11.5388	9.86199	8.5708	11.1056	12.5707
ENSG00000034239	79645	EFCAB1	EF-hand calcium binding domain 1	3.41318	5.20612	2.27833	1.39525	4.08286	17.8457	10.1358	10.28	3.80589	3.24116	4.98711	4.42688
ENSG00000034510	9168	TMSB10	thymosin beta 10	1735.37	1914.42	1426.35	1218.33	1068.59	1061.26	647.759	590.537	2486.58	765.666	501.144	553.99
ENSG00000034533	28990	ASTE1	asteroid homolog 1	9.28387	9.24365	7.32335	10.3524	7.69203	4.58171	3.90994	3.29951	5.25047	4.58387	4.89334	4.21351
ENSG00000034677	25897	RNF19A	ring finger protein 19A, RBR E3 ubiquitin protein ligase	61.6212	56.0913	62.6604	73.7414	65.7519	81.3202	46.4316	61.2413	40.1425	59.8762	53.2961	50.9993
ENSG00000034693	8504	PEX3	peroxisomal biogenesis factor 3	8.06873	11.6329	9.62563	10.9725	10.9144	9.56093	7.71538	10.6996	14.4179	8.5189	10.1382	11.0798
ENSG00000034713	11345	GABARAPL2	GABA type A receptor associated protein like 2	146.665	171.497	126.93	115.082	146.136	200.277	153.047	177.239	490.405	253.192	201.14	224.55
ENSG00000035115	26751	SH3YL1	SH3 and SYLF domain containing 1	19.6842	23.5671	31.0688	37.9817	29.8917	32.6578	28.2512	29.1616	34.3086	34.2478	29.947	29.394
ENSG00000035141	84908	FAM136A	family with sequence similarity 136 member A	32.7335	40.5544	34.0756	36.087	32.4515	18.4315	22.6023	20.9605	31.1417	21.8139	22.081	22.558
ENSG00000035403	7414	VCL	vinculin	52.4786	48.4773	42.4035	26.9576	49.6496	133.874	63.4155	34.1967	11.4177	27.5273	28.3071	33.404
ENSG00000035499	55789	DEPDC1B	DEP domain containing 1B	33.0308	15.9223	15.9996	16.5535	4.72183	1.44355	0.699251	1.583	0.805627	0	0.444528	0.502373
ENSG00000035664	23604	DAPK2	death associated protein kinase 2	1.49213	1.64986	2.73613	4.18574	4.01135	6.17171	3.92848	5.96964	6.25056	4.94354	6.99253	8.32752
ENSG00000035681	8439	NSMAF	neutral sphingomyelinase activation associated factor	17.9138	24.5286	23.0843	34.7089	24.3384	16.5904	17.1791	18.977	12.8067	13.9809	16.4972	17.8297
ENSG00000035687	159	ADSS	adenylosuccinate synthase	55.6569	57.5785	57.6343	49.316	54.5715	19.9796	32.9771	49.0731	29.3637	40.5007	52.3204	45.3392
ENSG00000035720	26228	STAP1	signal transducing adaptor family member 1	0	0	0	0	0	0	0	0.438664	0	0	0	0
ENSG00000035862	7077	TIMP2	TIMP metallopeptidase inhibitor 2	243.479	384.957	359.013	293.019	587.314	589.911	534.566	421.861	343.169	453.104	510.058	447.328
ENSG00000035928	5981	RFC1	replication factor C subunit 1	73.0419	54.0509	68.5861	57.6186	57.4035	39.478	33.416	43.2751	16.3626	33.7243	48.6899	40.1279
ENSG00000036054	55773	TBC1D23	TBC1 domain family member 23	38.9195	45.8265	40.2283	42.9082	43.3688	29.1012	25.2995	31.6029	37.8645	26.3721	29.6496	27.8982
ENSG00000036257	8452	CUL3	cullin 3	178.956	126.242	154.569	128.587	132.699	60.441	73.8184	109.609	89.5913	108.453	97.4601	85.3404
ENSG00000036448	9172	MYOM2	myomesin 2	9.42498	8.2817	11.269	9.18107	15.789	11.7367	13.209	24.6987	25.8634	18.7369	14.9123	23.8903
ENSG00000036473	5009	OTC	ornithine carbamoyltransferase	0	0	0	0	0	0	0	0	0.416704	0	0	0
ENSG00000036530	10858	CYP46A1	cytochrome P450 family 46 subfamily A member 1	4.37094	7.93413	6.76372	6.42503	8.92433	40.1475	73.7175	145.045	93.6472	83.7513	127.111	132.42
ENSG00000036549	26009	ZZZ3	zinc finger ZZ-type containing 3	67.0976	63.2793	64.7476	58.8588	56.5808	23.2851	28.5516	32.6328	17.696	26.485	38.7105	30.0865
ENSG00000036565	6570	SLC18A1	solute carrier family 18 member A1	0	0	0	0	0	0	0	0	0.416704	0	0	0
ENSG00000036672	9099	USP2	ubiquitin specific peptidase 2	5.0976	5.21505	6.7478	6.18388	6.84524	14.1217	29.0339	25.1946	20.863	27.0315	32.2972	31.0352
ENSG00000036828	846	CASR	calcium sensing receptor	0	0	0	0	0	0	0.440066	1.01083	0	0	0	0
ENSG00000037042	27175	TUBG2	tubulin gamma 2	13.4927	17.9245	19.1887	28.5078	25.6653	80.8599	125.152	130.97	162.653	129.429	115.894	131.772
ENSG00000037241	51121	RPL26L1	ribosomal protein L26 like 1	24.1658	21.8975	17.3915	15.2099	16.7888	10.858	8.9551	12.1109	27.5302	11.9025	10.9326	10.8696
ENSG00000037280	2324	FLT4	fms related tyrosine kinase 4	10.0649	6.95163	7.22652	4.9092	8.31399	27.3857	10.4648	7.03769	2.19464	2.50844	3.39352	4.20334
ENSG00000037474	54888	NSUN2	NOP2/Sun RNA methyltransferase 2	26.4576	28.3	34.6611	45.5264	41.9198	26.6744	26.6749	29.8101	15.3625	26.9766	26.6949	25.7024
ENSG00000037637	54455	FBXO42	F-box protein 42	66.4302	56.2295	57.6998	55.4137	49.0752	57.4702	29.9867	33.0524	22.6965	24.9292	33.0642	33.3507
ENSG00000037749	4238	MFAP3	microfibril associated protein 3	73.6098	93.7525	75.1636	56.964	68.3686	32.7833	27.7962	24.3935	13.0289	22.2197	21.1975	17.9135
ENSG00000037757	84245	MRI1	methylthioribose-1-phosphate isomerase 1	3.78406	4.12302	5.50424	3.46228	7.22276	16.2975	6.44183	4.29128	2.86137	3.18972	5.05142	5.87806
ENSG00000037897	4234	METTL1	methyltransferase like 1	3.33515	4.86396	4.57011	3.94459	4.53236	4.53987	4.92845	6.92326	10.0842	6.92248	6.47051	6.7347
ENSG00000038002	175	AGA	aspartylglucosaminidase	6.7387	9.99199	7.86851	11.3859	10.9161	9.85382	9.01849	12.5305	21.4741	16.6999	12.8905	15.3092
ENSG00000038210	55300	PI4K2B	phosphatidylinositol 4-kinase type 2 beta	6.31452	8.17273	6.79287	8.04421	7.22143	5.4604	7.32125	3.45209	3.19473	3.58804	4.75828	4.25795
ENSG00000038219	259282	BOD1L1	biorientation of chromosomes in cell division 1 like 1	60.5705	67.1156	117.128	98.9248	101.965	46.7586	84.4799	123.112	28.8637	46.9327	97.7987	57.4218
ENSG00000038274	27430	MAT2B	methionine adenosyltransferase 2B	85.695	63.3706	58.4123	54.3802	49.6945	38.6412	40.6785	69.9001	65.2002	75.8272	68.4157	66.3163
ENSG00000038295	7092	TLL1	tolloid like 1	5.88972	3.68031	2.4476	1.22299	2.41692	1.31803	4.39349	9.21194	4.41706	4.95779	5.81042	3.26737
ENSG00000038358	23644	EDC4	enhancer of mRNA decapping 4	82.1736	64.9194	82.8149	69.7796	81.6187	42.8254	42.9701	58.6474	14.6402	27.5223	36.8299	41.0853
ENSG00000038382	7204	TRIO	trio Rho guanine nucleotide exchange factor	302.967	290.184	442.569	381.454	378.246	125.254	235.625	284.197	59.1997	121.652	158.329	125.31
ENSG00000038427	1462	VCAN	versican	531.5	563.837	603.977	266.423	378.976	109.354	104.666	79.3218	30.1971	66.1001	53.3452	38.6534
ENSG00000038532	23274	CLEC16A	C-type lectin domain containing 16A	51.1428	54.944	64.0486	49.0748	46.8248	47.9302	57.1643	57.4268	18.1405	32.5153	45.1577	43.378
ENSG00000038945	4481	MSR1	macrophage scavenger receptor 1	0	0	0	0	0.442646	6.46461	1.27166	2.3459	0.805627	0.858136	0.589788	0.831017
ENSG00000039068	999	CDH1	cadherin 1	0.903713	4.32986	3.30473	9.31888	3.49703	9.9375	1.73451	0.858255	0.805627	1.72183	4.76909	3.51623
ENSG00000039123	23517	MTREX	Mtr4 exosome RNA helicase	116.069	78.0638	90.8552	68.0915	68.748	34.2059	31.3948	42.3597	29.9193	38.6034	37.4245	40.0499
ENSG00000039139	1767	DNAH5	dynein axonemal heavy chain 5	5.3976	2.86451	3.84696	2.32541	4.94463	5.08382	8.74749	14.1707	3.63921	3.58472	4.24588	3.31751
ENSG00000039319	9765	ZFYVE16	zinc finger FYVE-type containing 16	32.5563	30.437	35.1051	44.2862	37.3588	43.9552	36.6054	33.5482	45.3096	36.5221	49.1142	54.5478
ENSG00000039523	79567	RIPOR1	RHO family interacting cell polarization regulator 1	73.4132	79.5483	101.688	96.0309	111.631	145.129	131.201	123.799	89.2024	84.2155	97.9009	105.122
ENSG00000039560	26064	RAI14	retinoic acid induced 14	101.34	57.0788	87.6665	53.4156	46.2451	31.0259	16.4612	15.1625	7.25065	7.86245	13.4171	12.4033
ENSG00000039600	11063	SOX30	SRY-box 30	0.472205	0	0	0	0	0	0.444491	0.400519	0.416704	0	0.446573	0
ENSG00000039650	11284	PNKP	polynucleotide kinase 3'-phosphatase	17.4675	16.3594	18.1642	17.7593	17.5733	27.8459	21.7269	15.6584	34.7531	17.0286	16.8551	19.7982
ENSG00000040199	23035	PHLPP2	PH domain and leucine rich repeat protein phosphatase 2	18.861	24.0302	25.1615	24.8216	23.7987	14.8749	32.6305	56.9309	14.2513	31.1626	51.5107	40.5183
ENSG00000040275	54908	SPDL1	spindle apparatus coiled-coil protein 1	35.2256	19.4739	22.104	25.3039	13.8569	6.42277	6.41509	7.95316	4.75042	8.81148	6.00815	6.42464
ENSG00000040341	27067	STAU2	staufen double-stranded RNA binding protein 2	131.815	114.214	109.122	68.8839	98.7841	45.7962	60.2859	88.591	80.8127	108.92	85.3901	79.3848
ENSG00000040487	54896	PQLC2	PQ loop repeat containing 2	9.60424	10.5182	10.9632	10.4902	10.9583	12.9501	13.7946	12.3779	10.1954	7.86873	10.6538	10.6268
ENSG00000040531	1497	CTNS	cystinosin, lysosomal cystine transporter	8.92239	10.9744	8.5823	9.69783	11.0196	19.9796	14.5168	9.25008	11.5288	8.69292	11.6633	12.9868
ENSG00000040608	65078	RTN4R	reticulon 4 receptor	32.674	40.0322	33.6956	30.8849	41.8452	59.9388	61.1153	81.6868	80.146	53.0877	71.4653	60.5364
ENSG00000040633	79142	PHF23	PHD finger protein 23	61.7402	56.4541	51.2289	35.1568	41.1256	28.4317	31.3407	34.7307	45.254	36.3725	32.6156	33.3611
ENSG00000040731	1008	CDH10	cadherin 10	20.4237	23.6993	27.0128	31.2639	35.0918	32.5741	46.8978	63.7207	36.7533	38.8595	39.8925	38.2901
ENSG00000040933	3631	INPP4A	inositol polyphosphate-4-phosphatase type I A	82.5672	80.4895	100.663	82.7675	102.477	38.0973	73.775	181.435	49.5877	68.6084	99.7841	95.2551
ENSG00000041353	5874	RAB27B	RAB27B, member RAS oncogene family	7.62059	13.801	4.91368	6.94179	8.15867	7.30145	19.5049	69.5187	45.5874	54.4982	46.3117	31.938
ENSG00000041357	5685	PSMA4	proteasome subunit alpha 4	108.467	103.15	77.6785	96.3754	82.0171	47.8046	48.4407	55.1381	135.262	70.3709	60.0391	55.922
ENSG00000041515	23026	MYO16	myosin XVI	24.2563	27.4668	48.341	50.2806	67.7632	20.6491	51.2346	88.2095	21.0852	39.076	32.7722	22.6015
ENSG00000041802	55341	LSG1	large 60S subunit nuclear export GTPase 1	29.3313	23.6958	35.132	25.614	28.2678	16.3812	17.0576	22.5244	7.25065	15.4918	16.0003	17.638
ENSG00000041880	10039	PARP3	poly(ADP-ribose) polymerase family member 3	5.33017	4.24488	4.52483	5.25371	4.1813	14.5401	14.2585	12.9501	12.5845	10.7725	12.5387	16.5384
ENSG00000041982	3371	TNC	tenascin C	173.146	151.806	189.878	130.895	463.584	191.7	102.87	68.6413	15.3069	6.03431	14.4668	11.3228
ENSG00000041988	90326	THAP3	THAP domain containing 3	25.2213	25.887	20.2228	19.4818	18.409	23.2015	13.5012	12.3398	29.9193	11.2904	12.0287	14.2104
ENSG00000042062	140876	RIPOR3	RIPOR family member 3	1.01674	2.65611	3.6614	9.52558	4.70336	8.68224	3.67699	2.95621	1.75016	0.438775	2.77769	3.33805
ENSG00000042088	55775	TDP1	tyrosyl-DNA phosphodiesterase 1	26.4266	24.426	22.7463	21.6866	20.6587	8.09645	7.85264	9.36452	6.08387	6.88153	8.92443	9.21614
ENSG00000042286	84883	AIFM2	apoptosis inducing factor mitochondria associated 2	2.16144	2.57136	2.89087	4.25464	6.32777	14.7075	7.76344	6.12222	5.91719	6.73929	8.05258	9.83471
ENSG00000042304	56918	C2orf83	chromosome 2 open reading frame 83	0	0	0	1.91201	0	0	0	0	0	0	0	0
ENSG00000042317	55812	SPATA7	spermatogenesis associated 7	21.8388	18.4916	15.9932	16.898	16.0817	9.64461	11.513	16.5357	24.4188	19.4902	15.0832	13.0255
ENSG00000042429	9440	MED17	mediator complex subunit 17	43.4004	53.487	47.4867	59.8578	44.1746	15.0841	18.2859	19.2821	17.4738	19.7904	15.9622	16.2995
ENSG00000042445	54884	RETSAT	retinol saturase	12.1399	13.3309	14.466	11.5237	22.3588	45.1267	51.1614	51.7051	42.1426	51.8197	56.8762	52.4927
ENSG00000042493	822	CAPG	capping actin protein, gelsolin like	21.0909	27.3631	17.5206	31.7806	24.5305	41.7794	11.1759	13.7893	23.0854	16.4863	8.60319	18.1735
ENSG00000042753	1175	AP2S1	adaptor related protein complex 2 subunit sigma 1	65.2091	82.445	62.1931	51.6242	63.5831	92.4083	92.1003	96.8302	232.048	131.069	98.1588	108.158
ENSG00000042781	7399	USH2A	usherin	0.433619	0	0	0	0	0	0.57915	0.553098	0.472264	0.409293	0	0
ENSG00000042832	7038	TG	thyroglobulin	0	0.684485	1.40695	1.94646	2.27474	1.69461	2.64001	6.57996	2.75024	2.64216	1.93135	2.59506
ENSG00000042980	10863	ADAM28	ADAM metallopeptidase domain 28	0.520597	1.01625	0.875231	1.46415	3.68568	7.34329	2.17632	4.21499	2.41688	1.98516	1.37902	2.70883
ENSG00000043039	8538	BARX2	BARX homeobox 2	0	0	0	0	0	0.564869	1.50553	1.62115	0.861188	0	0.485322	0.404977
ENSG00000043093	54165	DCUN1D1	defective in cullin neddylation 1 domain containing 1	34.4804	41.4294	33.3034	33.0209	35.1997	22.4065	27.4822	36.6761	26.2523	41.0006	37.4228	31.8202
ENSG00000043143	23338	JADE2	jade family PHD finger 2	2.93125	4.47528	5.8249	6.35613	8.2618	16.6322	28.2099	69.5568	32.2529	69.4728	79.4937	82.0537
ENSG00000043355	7546	ZIC2	Zic family member 2	40.9273	41.2088	15.1382	3.01442	16.0206	26.507	19.5709	8.79235	17.5293	5.82676	18.3482	10.1297
ENSG00000043462	3937	LCP2	lymphocyte cytosolic protein 2	0.960363	1.26193	0.883193	0.91294	2.26177	10.0212	4.29434	4.36756	3.47253	4.4761	2.57682	3.69889
ENSG00000043514	54802	TRIT1	tRNA isopentenyltransferase 1	9.98009	13.5037	14.2604	21.5144	14.4192	11.8622	9.78615	9.93669	9.47307	10.6967	9.17886	9.37102
ENSG00000043591	153	ADRB1	adrenoceptor beta 1	0	1.24844	2.48938	3.08333	1.50905	19.5612	15.301	14.7811	12.2511	13.0725	11.924	14.933
ENSG00000044090	9820	CUL7	cullin 7	72.7567	55.2889	66.9101	52.1065	58.1008	33.7038	35.8595	45.3731	23.9744	28.8677	33.235	34.3779
ENSG00000044115	1495	CTNNA1	catenin alpha 1	310.499	254.016	248.18	262.565	310.332	396.098	185.714	191.048	110.038	167.767	200.945	232.205
ENSG00000044446	5256	PHKA2	phosphorylase kinase regulatory subunit alpha 2	24.9949	17.5649	27.1091	30.506	27.8469	17.762	14.2378	12.0346	8.41742	9.20249	11.9363	14.7488
ENSG00000044459	54875	CNTLN	centlein	18.3298	11.6744	19.6471	13.7285	10.464	5.04198	4.58928	3.60467	1.52791	2.33322	2.92955	2.187
ENSG00000044524	2042	EPHA3	EPH receptor A3	319.481	195.505	200.62	179.126	139.294	7.76171	17.5484	19.1677	6.195	7.64864	6.97853	6.9339
ENSG00000044574	3309	HSPA5	heat shock protein family A (Hsp70) member 5	263.532	222.055	234.74	147.845	198.364	212.37	200.639	263.446	208.935	199.505	254.745	252.819
ENSG00000046604	1829	DSG2	desmoglein 2	20.7646	13.1196	11.378	5.90827	7.37043	1.65276	1.4955	2.49848	0	0	0	0
ENSG00000046647	54960	GEMIN8	gem nuclear organelle associated protein 8	14.4718	15.6991	12.8747	16.6913	15.0368	17.3854	12.4074	10.2037	11.6955	12.2034	11.4039	14.5649
ENSG00000046651	8481	OFD1	OFD1 centriole and centriolar satellite protein	10.8953	11.8664	14.3807	33.2276	13.2547	16.0883	11.0281	6.65624	9.30638	12.5614	9.38682	12.5191
ENSG00000046653	2824	GPM6B	glycoprotein M6B	486.975	587.723	413.522	337.219	651.06	1156.37	1005.15	1049.99	1000.84	1573.75	1399.21	1247.12
ENSG00000046889	80243	PREX2	phosphatidylinositol-3,4,5-trisphosphate dependent Rac exchange factor 2	20.0333	20.5881	19.4854	7.32074	23.3268	33.2854	55.337	66.3908	18.3072	49.3375	79.3959	47.1059
ENSG00000047056	22884	WDR37	WD repeat domain 37	59.8569	68.2439	57.4585	45.802	52.7775	29.0175	49.7812	87.6374	27.4191	53.2079	60.553	54.096
ENSG00000047188	64848	YTHDC2	YTH domain containing 2	38.3799	34.7339	43.2151	41.5301	39.2597	14.3728	22.5816	38.4308	13.8623	29.1027	28.2562	26.6594
ENSG00000047230	56474	CTPS2	CTP synthase 2	45.3282	23.9502	28.4101	24.7183	25.5321	12.448	8.24012	6.50367	2.69468	6.72097	6.83148	5.90438
ENSG00000047249	51606	ATP6V1H	ATPase H+ transporting V1 subunit H	74.7804	69.9395	72.74	49.2815	75.6468	73.9978	98.7968	261.31	264.107	209.905	250.196	219.845
ENSG00000047315	5431	POLR2B	RNA polymerase II subunit B	262.596	220.756	221.244	176.025	202.811	50.6917	62.9002	99.2715	41.2537	83.5199	80.9337	79.3541
ENSG00000047346	56204	FAM214A	family with sequence similarity 214 member A	25.5039	36.865	31.6222	61.2359	45.2988	21.5278	21.8894	22.143	13.9735	16.0624	22.3267	18.3208
ENSG00000047365	116984	ARAP2	ArfGAP with RhoGAP domain, ankyrin repeat and PH domain 2	5.79592	10.761	11.972	16.4501	23.7883	27.6786	36.1864	54.9093	25.5856	48.0791	76.5205	64.3335
ENSG00000047410	7175	TPR	translocated promoter region, nuclear basket protein	151.24	97.6132	168.856	142.195	132.288	74.6254	90.7792	99.6911	17.4738	49.6904	88.8133	63.0084
ENSG00000047457	1356	CP	ceruloplasmin	0	0	0	0	0	2.94987	1.62891	11.9584	0.861188	0.852224	2.14792	2.62501
ENSG00000047578	23247	KIAA0556	KIAA0556	13.9567	16.0283	23.2895	25.0628	22.4794	23.4107	28.8272	23.7451	11.1399	18.2605	21.7471	21.9651
ENSG00000047579	84062	DTNBP1	dystrobrevin binding protein 1	15.2899	14.8716	16.7197	10.5246	11.2758	19.0172	20.8189	24.4317	52.088	57.3484	39.6837	51.5539
ENSG00000047597	7504	XK	X-linked Kx blood group	5.47495	6.24878	5.31478	2.01536	3.65277	7.46882	9.69157	25.1564	17.196	23.5812	19.8138	17.4169
ENSG00000047617	57101	ANO2	anoctamin 2	3.39599	2.84772	2.49141	1.3608	1.42231	3.28461	3.56363	2.65105	1.86128	1.63918	2.14188	2.01864
ENSG00000047621	57102	C12orf4	chromosome 12 open reading frame 4	25.9353	31.0552	30.6077	27.2332	30.2968	17.1344	14.5186	26.8729	22.8076	23.8529	17.9723	19.4804
ENSG00000047634	6322	SCML1	Scm polycomb group protein like 1	12.2899	9.10316	10.3017	14.0386	10.7659	10.858	7.07071	3.79539	7.97293	5.05363	5.49163	6.92523
ENSG00000047644	55841	WWC3	WWC family member 3	26.7319	18.3226	22.1308	25.0283	17.7241	29.8962	30.2785	20.0069	10.751	23.3547	31.919	28.3333
ENSG00000047648	395	ARHGAP6	Rho GTPase activating protein 6	0.935929	1.04652	0.810908	1.2919	2.01436	10.1467	14.2097	9.97483	9.30638	11.6487	17.101	20.0299
ENSG00000047662	27146	FAM184B	family with sequence similarity 184 member B	5.23845	3.64371	12.4183	14.142	9.88572	8.47303	10.9103	8.29647	2.47244	3.04827	5.67439	4.13042
ENSG00000047849	4134	MAP4	microtubule associated protein 4	473.519	494.006	478.415	406.017	597.428	637.569	709.119	985.487	668.421	1131.91	851.344	877.64
ENSG00000047932	57120	GOPC	golgi associated PDZ and coiled-coil motif containing	66.5889	68.0006	70.8404	76.3252	65.3827	36.047	42.1336	50.2937	38.8646	45.9229	49.2712	40.5658
ENSG00000047936	6098	ROS1	ROS proto-oncogene 1, receptor tyrosine kinase	0	0	0	0	0	0	0	0.553098	0	0	0	0
ENSG00000048028	57646	USP28	ubiquitin specific peptidase 28	34.1341	27.3203	30.7162	37.3961	24.5574	18.2641	10.0823	8.63977	5.08379	8.00711	12.3381	9.42493
ENSG00000048052	9734	HDAC9	histone deacetylase 9	92.8052	76.8207	89.5872	75.9807	100.695	19.8959	40.8542	58.5711	27.808	31.2318	32.8483	33.7203
ENSG00000048140	26262	TSPAN17	tetraspanin 17	29.6885	33.5412	30.0787	27.2332	28.5791	33.4109	41.0568	44.2287	56.6995	35.836	30.2284	35.5595
ENSG00000048162	51491	NOP16	NOP16 nucleolar protein	8.35782	10.0718	9.89135	9.49113	8.47098	7.38514	8.00445	9.89854	22.252	8.96167	9.14849	10.0369
ENSG00000048342	57545	CC2D2A	coiled-coil and C2 domain containing 2A	30.1038	25.7267	29.906	31.2639	36.4873	23.2851	19.0044	16.879	12.6956	11.9391	13.6811	13.357
ENSG00000048392	50484	RRM2B	ribonucleotide reductase regulatory TP53 inducible subunit M2B	13.48	17.8769	18.8795	20.4464	23.3312	21.193	23.853	35.3792	20.1962	36.6985	29.8868	26.4244
ENSG00000048405	168850	ZNF800	zinc finger protein 800	10.9141	9.96786	11.0492	9.56003	12.2088	10.9836	8.36666	10.4326	3.47253	9.46633	8.01034	6.92811
ENSG00000048471	92017	SNX29	sorting nexin 29	75.6126	61.0754	75.1411	57.1707	69.5194	25.4609	36.3213	41.7875	12.9178	28.2513	34.6831	38.1759
ENSG00000048540	55885	LMO3	LIM domain only 3	264.278	671.204	549.169	250.266	353.36	283.752	364.127	452.72	525.13	588.913	464.959	369.167
ENSG00000048544	55173	MRPS10	mitochondrial ribosomal protein S10	23.8341	25.9636	24.1698	23.7192	21.9815	14.7912	21.2748	24.6987	38.1423	31.6036	28.721	26.4973
ENSG00000048545	2978	GUCA1A	guanylate cyclase activator 1A	4.59662	8.41958	5.94943	4.15129	9.80498	4.70724	7.53386	9.8604	16.8626	11.0713	7.61569	7.5177
ENSG00000048649	51773	RSF1	remodeling and spacing factor 1	188.85	142.524	187.471	154.494	156.529	49.0181	74.1181	79.0167	33.8086	66.5144	85.2918	57.7603
ENSG00000048707	55187	VPS13D	vacuolar protein sorting 13 homolog D	86.707	88.6005	125.854	116.391	86.766	50.1059	111.648	175.179	32.5862	95.3744	140.021	120.108
ENSG00000048740	10659	CELF2	CUGBP Elav-like family member 2	375.283	392.616	447.129	371.567	439.438	152.326	217.271	369.259	130.484	229.866	278.439	219.904
ENSG00000048828	23196	FAM120A	family with sequence similarity 120A	40.5372	39.9083	46.3209	50.9352	56.4519	63.9557	83.907	108.274	43.2538	81.7638	88.588	85.7048
ENSG00000048991	23518	R3HDM1	R3H domain containing 1	71.7498	76.5728	112.842	171.857	150.414	62.6586	117.124	194.214	137.04	131.72	121.291	115.472
ENSG00000049089	1298	COL9A2	collagen type IX alpha 2 chain	24.7405	39.7205	30.5432	60.7191	40.5268	26.7999	75.1751	53.0402	58.6997	56.895	63.55	92.5994
ENSG00000049130	4254	KITLG	KIT ligand	41.8225	99.7153	40.1968	104.265	84.8604	26.5907	30.8716	33.7008	19.9184	26.9223	26.913	19.2305
ENSG00000049167	1161	ERCC8	ERCC excision repair 8, CSA ubiquitin ligase complex subunit	18.9212	18.3764	15.1372	13.9697	11.255	6.63198	5.55455	5.77892	9.52863	5.95783	6.73546	6.0328
ENSG00000049192	11174	ADAMTS6	ADAM metallopeptidase with thrombospondin type 1 motif 6	3.36969	3.15806	4.9559	6.21833	4.58248	9.01698	3.06119	1.62115	0.416704	0	0.661734	0.595165
ENSG00000049239	9563	H6PD	hexose-6-phosphate dehydrogenase/glucose 1-dehydrogenase	27.7424	26.1022	38.6683	41.1512	30.5377	55.2944	33.7837	21.4182	10.5843	12.7225	23.0174	24.0505
ENSG00000049245	9341	VAMP3	vesicle associated membrane protein 3	18.8062	23.7096	19.56	32.4352	30.0636	101.906	43.9417	50.4082	108.649	103.466	82.1605	99.7571
ENSG00000049246	8863	PER3	period circadian regulator 3	12.3702	12.9651	14.1547	14.7276	21.6192	38.7249	48.4804	35.6462	19.085	32.0615	47.529	36.6365
ENSG00000049283	55040	EPN3	epsin 3	0.506767	0.424708	0	0	0	0.815921	0.651785	0.553098	0.583385	0	0	1.00409
ENSG00000049323	4052	LTBP1	latent transforming growth factor beta binding protein 1	149.249	136.395	125.275	80.4248	82.0184	53.6207	43.3006	38.6978	8.75078	15.678	20.7526	19.8751
ENSG00000049449	5954	RCN1	reticulocalbin 1	75.1827	67.1064	51.9713	56.6884	45.441	50.0641	39.8888	30.9163	31.5306	43.0275	35.2276	37.0515
ENSG00000049540	2006	ELN	elastin	36.6771	26.4669	20.7463	16.519	34.2634	115.924	63.1567	15.8491	11.751	10.125	11.4977	15.23
ENSG00000049541	5982	RFC2	replication factor C subunit 2	44.571	40.2368	35.2324	30.9883	26.8343	22.6994	14.1185	14.7048	20.1407	11.9737	12.8676	13.8472
ENSG00000049618	57492	ARID1B	AT-rich interaction domain 1B	165.106	127.023	197.377	207.72	158.368	64.3741	78.4731	103.086	31.3083	66.0259	78.1629	70.7088
ENSG00000049656	81037	CLPTM1L	CLPTM1 like	69.2114	72.2235	69.0913	60.099	60.7168	48.2231	63.827	72.9898	60.6443	63.2755	70.6194	68.9212
ENSG00000049759	23327	NEDD4L	NEDD4 like E3 ubiquitin protein ligase	405.844	368.252	447.84	391.617	440.528	67.5123	82.1939	177.506	111.149	113.498	132.885	121.062
ENSG00000049768	50943	FOXP3	forkhead box P3	0.464558	0.725099	0.753591	0.740687	0.938712	0.815921	1.54266	0.8964	1.08343	1.19596	0.854195	1.00469
ENSG00000049769	89801	PPP1R3F	protein phosphatase 1 regulatory subunit 3F	18.4119	20.6159	21.5054	21.5144	19.9309	20.4817	48.3924	73.0661	61.8111	70.1165	63.5026	68.295
ENSG00000049860	3074	HEXB	hexosaminidase subunit beta	13.0671	15.1122	13.0543	10.3524	15.6936	37.1767	21.3896	18.8625	23.3632	30.509	23.8965	27.0696
ENSG00000049883	79810	PTCD2	pentatricopeptide repeat domain 2	7.25618	5.83841	5.90644	4.358	5.37513	5.79513	5.87701	10.6233	8.91746	8.73065	9.255	9.44848
ENSG00000050030	340533	NEXMIF	neurite extension and migration factor	100.959	83.8149	91.19	49.5571	75.8132	21.8207	27.7393	52.6206	22.5853	29.7412	29.9519	23.2875
ENSG00000050130	51528	JKAMP	JNK1/MAPK8 associated membrane protein	26.0743	29.5201	21.0814	28.5078	27.4589	34.0386	22.7751	27.9028	35.8087	39.4039	35.4254	37.4558
ENSG00000050165	27122	DKK3	dickkopf WNT signaling pathway inhibitor 3	192.428	172.233	173.192	108.812	245.117	213.039	223.526	532.29	255.939	490.56	454.927	518.344
ENSG00000050327	7984	ARHGEF5	Rho guanine nucleotide exchange factor 5	0	0.572064	0.62948	0.91294	0.750936	1.4854	0.57526	0.438664	0.472264	0.592958	0.57887	0.511181
ENSG00000050344	9603	NFE2L3	nuclear factor, erythroid 2 like 3	5.37186	10.2092	7.95636	12.8673	6.34022	3.53566	4.04018	5.66448	3.58365	4.86662	4.48218	3.8693
ENSG00000050393	63933	MCUR1	mitochondrial calcium uniporter regulator 1	34.9048	42.1168	60.51	45.8365	52.3162	34.6244	41.7551	39.8803	46.5875	41.5929	48.9321	49.5674
ENSG00000050405	51474	LIMA1	LIM domain and actin binding 1	22.1473	24.0715	24.3185	32.7797	43.3415	41.1517	33.5139	23.9739	24.4188	22.4509	21.4053	17.4184
ENSG00000050426	25875	LETMD1	LETM1 domain containing 1	54.7777	53.2983	52.8357	50.2806	55.562	66.2988	50.4283	64.0258	58.3107	66.0135	70.9071	72.8916
ENSG00000050438	9498	SLC4A8	solute carrier family 4 member 8	53.3711	27.864	45.0962	20.5153	28.7988	4.91645	22.0543	78.5589	14.7513	30.5724	39.1434	32.0384
ENSG00000050555	10319	LAMC3	laminin subunit gamma 3	8.90114	6.29607	5.79538	4.08239	8.04392	43.202	41.555	19.8543	6.69504	6.69114	8.39806	11.8503
ENSG00000050628	5733	PTGER3	prostaglandin E receptor 3	6.40882	9.42136	4.30441	1.39525	3.35327	5.66961	11.0993	22.2574	20.6407	36.3782	40.6914	14.9946
ENSG00000050730	79931	TNIP3	TNFAIP3 interacting protein 3	0	0	0	0	0	0	0.440221	1.85002	1.19455	0.820595	0.804757	0.611022
ENSG00000050748	5601	MAPK9	mitogen-activated protein kinase 9	54.7501	53.2226	58.8656	53.2433	69.0614	57.8467	127.545	229.307	134.651	199.315	196.131	191.48
ENSG00000050767	91522	COL23A1	collagen type XXIII alpha 1 chain	0.584843	1.36355	0.850059	1.15409	2.27781	11.4857	10.7934	6.00779	6.36168	3.41817	7.73351	6.69238
ENSG00000050820	9564	BCAR1	BCAR1 scaffold protein, Cas family member	61.6037	69.934	71.8274	69.5729	67.7322	110.4	94.5513	98.5468	70.3118	79.4221	87.7869	93.6127
ENSG00000051009	84067	FAM160A2	family with sequence similarity 160 member A2	32.1185	38.0482	35.4169	31.2983	33.2622	56.6333	38.2652	48.9587	22.1964	33.9453	34.4788	35.9631
ENSG00000051108	9709	HERPUD1	homocysteine inducible ER protein with ubiquitin like domain 1	34.7871	38.4235	27.3015	25.7518	34.0106	78.8096	61.5123	55.7484	71.6453	57.071	51.2523	56.7646
ENSG00000051128	9454	HOMER3	homer scaffold protein 3	21.6451	26.9748	22.795	36.1214	30.1834	27.302	15.2802	17.2223	26.0301	10.7896	11.638	13.5516
ENSG00000051180	5888	RAD51	RAD51 recombinase	18.2118	11.0509	9.41079	11.0414	3.02579	1.15066	0.797968	0.667532	0	0	0	0
ENSG00000051341	10721	POLQ	DNA polymerase theta	8.8536	5.55261	6.1645	8.00975	2.73583	1.15066	0.74797	0.476808	0	0	0	0
ENSG00000051382	5291	PIK3CB	phosphatidylinositol-4,5-bisphosphate 3-kinase catalytic subunit beta	36.7912	38.5498	42.5143	34.9156	43.8008	29.6033	41.643	73.6764	40.7536	65.1032	70.1563	61.5358
ENSG00000051523	1535	CYBA	cytochrome b-245 alpha chain	11.8742	10.7275	6.88207	9.49113	12.0502	77.931	23.1347	16.0398	31.7528	20.5785	6.92764	13.0699
ENSG00000051596	84321	THOC3	THO complex 3	14.7866	11.7763	13.2344	6.70063	9.45643	5.75329	8.13013	15.4295	16.3626	8.38989	11.5224	13.2328
ENSG00000051620	23593	HEBP2	heme binding protein 2	17.0648	23.3926	23.7043	17.8971	23.9554	36.3817	18.8124	7.34285	31.7528	11.2747	9.49506	10.693
ENSG00000051825	10198	MPHOSPH9	M-phase phosphoprotein 9	18.1963	13.9415	17.6417	22.2723	12.9592	8.59856	8.7449	9.0975	4.80598	6.47559	11.197	9.45883
ENSG00000052126	54477	PLEKHA5	pleckstrin homology domain containing A5	39.2545	36.9965	50.521	47.1111	44.2089	12.3643	25.8868	39.6514	15.0847	21.8201	25.7047	24.7077
ENSG00000052723	80143	SIKE1	suppressor of IKBKE 1	27.7309	29.4115	27.1305	24.8216	27.3887	22.6994	21.2184	19.8543	11.251	17.1824	16.6625	13.5206
ENSG00000052749	23223	RRP12	ribosomal RNA processing 12 homolog	33.103	25.5981	34.5975	25.2006	24.7162	19.3938	29.3133	40.6431	21.2519	33.6999	35.3067	36.3238
ENSG00000052795	57600	FNIP2	folliculin interacting protein 2	76.8102	60.1884	63.9304	47.8691	60.0922	20.6072	34.7653	65.7042	23.6966	51.2779	49.6352	42.8669
ENSG00000052802	6307	MSMO1	methylsterol monooxygenase 1	133.056	146.274	128.024	75.3606	146.138	46.633	77.0455	75.0115	161.209	65.0127	91.4376	61.7604
ENSG00000052841	55761	TTC17	tetratricopeptide repeat domain 17	52.3273	51.3238	58.8078	67.6092	57.6374	48.8925	37.9202	34.6926	15.418	22.3557	30.0053	28.5879
ENSG00000052850	60529	ALX4	ALX homeobox 4	1.66665	0.477039	0.723521	0	1.5442	6.79935	5.20413	2.72734	0	0.884437	0.632872	0.642416
ENSG00000053108	23105	FSTL4	follistatin like 4	2.85556	2.73237	2.50735	0.878489	3.16378	3.91224	7.20294	21.7997	5.41715	16.6968	17.3013	17.6048
ENSG00000053254	1112	FOXN3	forkhead box N3	226.583	152.363	181.123	179.884	162.663	93.7054	72.1313	54.9093	35.6421	55.6358	67.2111	48.7202
ENSG00000053328	728464	METTL24	methyltransferase like 24	0.434304	0	0	0	0.565677	0.815921	0.86229	1.50671	0.916748	1.05887	1.19576	1.2461
ENSG00000053371	8574	AKR7A2	aldo-keto reductase family 7 member A2	50.9554	48.7654	31.5832	27.4054	31.8039	76.8431	46.0457	35.7225	74.8122	36.5984	34.1915	43.4919
ENSG00000053372	51154	MRTO4	MRT4 homolog, ribosome maturation factor	33.092	31.2593	33.7349	33.1587	28.7651	26.8836	29.9583	33.0524	63.8668	35.5289	30.158	35.6621
ENSG00000053438	4826	NNAT	neuronatin	2070.12	2654.45	1639.56	860.248	1187.39	403.505	381.141	344.313	462.569	185.798	230.828	186.738
ENSG00000053501	55850	USE1	unconventional SNARE in the ER 1	16.1514	18.8077	20.1994	26.5786	20.3512	34.4151	25.8399	26.2245	90.3136	32.3163	20.5899	27.743
ENSG00000053524	23101	MCF2L2	MCF.2 cell line derived transforming sequence-like 2	5.55052	6.33394	7.84195	7.52745	15.8362	24.4149	35.0526	49.7979	8.13961	31.1531	30.8793	36.2429
ENSG00000053702	83714	NRIP2	nuclear receptor interacting protein 2	2.15873	1.8984	3.24269	5.49486	3.25784	3.95408	5.99259	9.55524	10.3065	7.21512	14.593	15.3861
ENSG00000053747	3909	LAMA3	laminin subunit alpha 3	2.64949	1.30019	4.07579	3.77234	4.49928	12.5317	9.41729	6.04593	1.6946	1.80835	4.99776	5.82538
ENSG00000053770	55745	AP5M1	adaptor related protein complex 5 subunit mu 1	32.5833	36.9763	30.3535	30.127	33.8354	16.1301	24.2265	35.8369	23.7521	31.8563	30.0522	25.9951
ENSG00000053900	29945	ANAPC4	anaphase promoting complex subunit 4	18.9352	18.8943	20.0019	40.7722	21.6978	16.2975	15.8381	14.1326	18.3072	13.0546	15.7908	18.8749
ENSG00000053918	3784	KCNQ1	potassium voltage-gated channel subfamily Q member 1	1.77485	1.16168	1.47391	1.46415	1.58769	6.88303	2.22756	2.53662	1.75016	0.832976	1.20613	1.92722
ENSG00000054116	27095	TRAPPC3	trafficking protein particle complex 3	50.3995	54.2648	46.7223	31.8151	35.4859	35.7541	40.8459	43.5803	80.5349	49.2769	47.309	51.1325
ENSG00000054118	9967	THRAP3	thyroid hormone receptor associated protein 3	247.77	177.492	227.672	184.672	188.071	94.626	95.836	103.811	40.9759	90.1641	97.1134	86.3836
ENSG00000054148	29085	PHPT1	phosphohistidine phosphatase 1	64.8918	86.75	65.3418	71.0198	81.1591	169.858	93.8518	61.3176	201.046	74.0398	52.152	78.3513
ENSG00000054179	954	ENTPD2	ectonucleoside triphosphate diphosphohydrolase 2	2.10859	2.42769	1.64673	1.80865	2.37745	21.2349	18.2113	9.8604	9.30638	5.51078	11.1054	11.5058
ENSG00000054219	4065	LY75	lymphocyte antigen 75	0	0	0	0	0.419687	0.481184	0.410983	0.82011	1.08343	0.738802	0	0.562385
ENSG00000054267	51742	ARID4B	AT-rich interaction domain 4B	68.158	66.0778	73.4766	84.3866	71.4531	24.373	38.064	44.4195	26.419	39.7157	52.7612	40.8225
ENSG00000054277	23596	OPN3	opsin 3	9.24238	6.95074	6.14702	5.59822	6.02886	3.41013	5.80557	9.21194	1.80572	3.06836	4.86608	4.70036
ENSG00000054282	10806	SDCCAG8	serologically defined colon cancer antigen 8	35.0848	52.1165	54.2262	65.1288	51.0546	55.8383	40.7378	35.3029	35.7532	23.9239	33.4278	28.0623
ENSG00000054356	5798	PTPRN	protein tyrosine phosphatase receptor type N	26.522	31.5105	40.6447	38.2918	55.0084	76.0062	183.811	639.4	229.993	357.859	350.301	343.061
ENSG00000054392	55733	HHAT	hedgehog acyltransferase	4.81299	3.28829	3.12158	1.73975	3.18954	4.03777	3.8765	3.22322	1.36123	2.93122	5.97267	5.17284
ENSG00000054523	23095	KIF1B	kinesin family member 1B	746.958	613.222	832.566	550.778	775.884	383.63	593.671	722.517	231.382	571.57	754.145	596.736
ENSG00000054598	2296	FOXC1	forkhead box C1	9.19345	5.00366	4.16237	3.46228	7.45238	27.0091	17.4086	8.86864	6.195	8.21004	5.74734	7.81364
ENSG00000054611	25771	TBC1D22A	TBC1 domain family member 22A	18.0938	17.4242	17.38	15.9678	16.5695	41.8212	26.1602	35.1122	24.1966	30.7326	31.9459	31.3579
ENSG00000054654	23224	SYNE2	spectrin repeat containing nuclear envelope protein 2	278.598	227.719	438.847	360.163	269.284	63.077	55.1984	39.5751	10.4732	15.5941	26.7033	22.2286
ENSG00000054690	57475	PLEKHH1	pleckstrin homology, MyTH4 and FERM domain containing H1	6.17386	7.36373	10.9495	17.2425	13.6587	27.9296	33.3851	98.5468	51.699	124.2	176.456	200.776
ENSG00000054793	10079	ATP9A	ATPase phospholipid transporting 9A (putative)	784.458	712.404	792.897	532.83	720.14	312.54	425.588	888.79	257.495	615.108	677.258	603.499
ENSG00000054803	140689	CBLN4	cerebellin 4 precursor	5.56715	11.9028	10.5389	4.73695	7.13384	3.41013	12.6122	22.6389	19.3628	28.9217	30.6085	29.5069
ENSG00000054938	25884	CHRDL2	chordin like 2	0	0	0	0	1.26082	1.23434	0.628357	1.12527	0.750067	0.788081	0.557328	0.509535
ENSG00000054965	23201	FAM168A	family with sequence similarity 168 member A	311.625	282.211	308.534	242.825	346.607	302.958	325.987	333.251	128.373	257.879	312.304	299.569
ENSG00000054967	84957	RELT	RELT TNF receptor	3.92463	5.19027	4.2302	3.25558	2.3812	7.38514	6.62279	4.02426	3.80589	5.644	4.98725	6.84198
ENSG00000054983	2581	GALC	galactosylceramidase	46.6532	39.7695	38.4554	28.749	42.073	46.382	37.9402	46.8989	17.0293	42.2694	46.8046	47.5215
ENSG00000055044	51602	NOP58	NOP58 ribonucleoprotein	44.676	40.6375	45.0024	65.4044	35.4257	21.4859	22.257	21.609	22.9743	20.8701	24.693	23.3236
ENSG00000055070	26099	SZRD1	SUZ RNA binding domain containing 1	97.1948	92.1624	71.7242	69.7796	60.4448	109.187	58.6872	34.9596	58.1996	50.4163	42.1135	47.2936
ENSG00000055118	3757	KCNH2	potassium voltage-gated channel subfamily H member 2	42.9137	32.2103	41.3413	22.6168	20.6911	30.482	42.77	50.1793	20.0851	38.3533	35.0763	42.0184
ENSG00000055130	8454	CUL1	cullin 1	127.343	125.721	131.078	99.0281	112.748	48.767	66.0895	96.0292	45.254	62.0448	85.2473	76.1912
ENSG00000055147	10827	FAM114A2	family with sequence similarity 114 member A2	16.8665	15.8211	16.0517	19.5507	17.7158	12.3643	11.0806	12.1109	9.80643	15.2556	10.7286	10.1613
ENSG00000055163	26999	CYFIP2	cytoplasmic FMR1 interacting protein 2	324.325	276.75	342.01	233.971	352.068	235.927	330.497	718.245	278.664	527.006	567.795	551.95
ENSG00000055208	23118	TAB2	TGF-beta activated kinase 1 (MAP3K7) binding protein 2	99.8094	88.8656	88.2507	92.4136	90.4947	109.647	56.5729	62.3856	45.4207	61.0541	68.155	61.2562
ENSG00000055211	116254	GINM1	glycoprotein integral membrane 1	21.4344	21.8442	20.6717	23.1336	23.1343	40.5659	22.5527	16.8027	26.419	25.4765	24.5359	22.3495
ENSG00000055332	5610	EIF2AK2	eukaryotic translation initiation factor 2 alpha kinase 2	29.1221	29.8661	38.3525	33.2965	41.9206	33.5783	29.1236	31.6791	33.5863	41.9926	35.8456	27.1896
ENSG00000055483	57602	USP36	ubiquitin specific peptidase 36	17.7154	21.1902	29.6165	35.8458	29.6732	40.0638	34.0257	31.6791	15.0291	25.3095	32.9819	36.3439
ENSG00000055609	58508	KMT2C	lysine methyltransferase 2C	75.5678	101.106	177.66	156.078	146.847	64.8344	94.5532	105.642	26.5857	51.2812	99.0282	72.8891
ENSG00000055732	55283	MCOLN3	mucolipin 3	0	0	0	0	0	0	0	1.31599	0.416704	0.954233	1.51439	0.769721
ENSG00000055813	114800	CCDC85A	coiled-coil domain containing 85A	9.49295	7.79465	9.48901	6.66618	5.92843	4.53987	17.7035	36.8287	1.47235	9.39206	12.8459	11.0363
ENSG00000055917	23369	PUM2	pumilio RNA binding family member 2	229.719	225.502	245.033	230.457	211.317	87.9731	125.808	171.67	86.8688	122.824	162.519	127.174
ENSG00000055950	84545	MRPL43	mitochondrial ribosomal protein L43	43.506	51.9612	42.4739	35.9836	46.981	70.1065	42.8212	37.2864	106.315	54.9516	36.6751	45.3809
ENSG00000056050	54969	HPF1	histone PARylation factor 1	41.9114	40.7379	34.585	36.2248	33.4374	17.9294	18.2989	17.9471	45.6429	22.7687	23.7184	22.9889
ENSG00000056097	51663	ZFR	zinc finger RNA binding protein	285.404	198.383	227.114	162.486	200.307	128.602	147.809	208.098	143.374	226.378	172.396	184.208
ENSG00000056277	55609	ZNF280C	zinc finger protein 280C	12.4481	10.5558	11.5563	11.3515	10.7061	3.66119	2.90501	3.26137	1.13899	2.47484	4.45253	2.58841
ENSG00000056291	10886	NPFFR2	neuropeptide FF receptor 2	1.67752	1.6262	0.5121	0	0	0	0.567914	0.476808	1.25011	2.90696	1.70412	1.11991
ENSG00000056487	112885	PHF21B	PHD finger protein 21B	113.412	82.3255	86.5945	131.963	65.053	15.9209	11.1069	5.32118	3.13917	4.51184	5.01845	5.53824
ENSG00000056558	7185	TRAF1	TNF receptor associated factor 1	2.1213	1.59042	2.85656	4.08239	3.52564	9.47724	7.86772	5.5119	5.36159	5.36811	7.98601	10.1945
ENSG00000056586	54542	RC3H2	ring finger and CCCH-type domains 2	134.661	126.936	143.102	111.568	123.241	51.7796	65.7626	86.7219	44.754	64.0954	81.7848	65.474
ENSG00000056661	---	---	---	87.6257	75.0691	92.7737	77.1176	71.0439	56.6333	31.6426	18.4048	18.4183	15.3416	16.2386	16.4066
ENSG00000056736	55540	IL17RB	interleukin 17 receptor B	5.68632	7.20074	8.78853	8.21646	9.09658	26.2978	19.182	11.1955	20.4185	21.0166	18.0917	17.7393
ENSG00000056972	10758	TRAF3IP2	TRAF3 interacting protein 2	5.51959	6.55972	5.23032	4.66805	6.92038	34.6662	16.4034	8.48719	17.9183	15.4091	9.90631	11.1143
ENSG00000056998	8908	GYG2	glycogenin 2	14.7761	11.4591	11.0073	9.18107	12.8797	24.7078	19.4997	21.3419	9.69531	14.8097	16.4129	14.6363
ENSG00000057019	131566	DCBLD2	discoidin, CUB and LCCL domain containing 2	89.7868	57.7627	42.0655	35.6047	26.0419	14.6238	17.5772	17.6801	9.02858	14.2059	15.1751	13.2576
ENSG00000057252	6646	SOAT1	sterol O-acyltransferase 1	18.3975	24.2394	25.6156	19.1717	36.0583	17.3017	13.4759	10.7759	9.30638	10.0983	11.1929	9.88836
ENSG00000057294	5318	PKP2	plakophilin 2	6.85997	6.08379	6.58429	3.42783	5.31001	4.16329	5.2916	18.8625	2.86137	6.65973	5.55047	6.56479
ENSG00000057468	4438	MSH4	mutS homolog 4	0	0	0	0	0	0.481184	0	0	0	0	0	0
ENSG00000057593	2155	F7	coagulation factor VII	0	0	0.474388	1.22299	0.553912	0.648553	1.3289	1.50671	0.750067	1.26008	1.20285	1.69453
ENSG00000057608	2665	GDI2	GDP dissociation inhibitor 2	444.817	304.227	312.962	254.676	256.589	139.02	99.7485	124.333	182.877	198.937	126.786	131.88
ENSG00000057657	639	PRDM1	PR/SET domain 1	1.54044	0.985606	1.21152	5.97717	2.78792	13.3686	2.92528	2.04074	1.30567	2.0871	2.0288	1.19013
ENSG00000057663	9474	ATG5	autophagy related 5	25.8989	35.3705	26.365	27.0954	31.8405	25.2099	19.7913	33.9678	43.5317	30.898	30.4793	30.0521
ENSG00000057704	57458	TMCC3	transmembrane and coiled-coil domain family 3	19.5215	21.0259	12.4066	23.3747	27.3322	18.4733	21.8693	28.9327	19.974	43.6558	40.9996	40.5965
ENSG00000057757	57095	PITHD1	PITH domain containing 1	82.8903	107.256	80.4475	67.437	78.009	52.4491	83.0812	132.724	197.379	183.265	161.445	164.267
ENSG00000057935	57504	MTA3	metastasis associated 1 family member 3	86.3432	64.4323	83.551	63.6819	70.6602	64.0812	88.8852	131.694	57.3107	103.757	127.946	108.612
ENSG00000058056	8975	USP13	ubiquitin specific peptidase 13	46.2013	39.0132	41.5985	36.2592	31.7686	10.6488	15.7065	17.2223	9.63975	16.7109	18.0687	14.8014
ENSG00000058063	23200	ATP11B	ATPase phospholipid transporting 11B (putative)	42.6577	33.2433	37.6549	42.667	31.7077	18.3478	17.0173	29.0853	5.08379	15.6666	19.9313	17.1719
ENSG00000058085	3918	LAMC2	laminin subunit gamma 2	2.82404	3.12212	4.81609	1.87756	1.0038	0	0.893169	2.6892	0.861188	0.919641	1.55996	0.858262
ENSG00000058091	5218	CDK14	cyclin dependent kinase 14	136.877	116.866	99.9819	81.8373	95.1393	51.1938	83.5211	161.714	115.983	149.55	153.036	113.223
ENSG00000058262	29927	SEC61A1	SEC61 translocon alpha 1 subunit	223.048	236.869	175.936	130.585	210.181	206.93	154.776	128.948	87.8134	94.9191	108.846	105.522
ENSG00000058272	4659	PPP1R12A	protein phosphatase 1 regulatory subunit 12A	74.5895	60.5924	76.775	72.0878	76.6428	41.4028	51.4637	72.9898	57.144	55.6937	73.9947	54.1545
ENSG00000058335	5923	RASGRF1	Ras protein specific guanine nucleotide releasing factor 1	19.7179	16.523	25.7218	14.7276	18.5269	37.5952	109.482	343.664	100.037	116.969	181.354	140.999
ENSG00000058404	816	CAMK2B	calcium/calmodulin dependent protein kinase II beta	64.9761	87.3991	146.209	143.056	135.441	204.964	467.52	809.258	347.17	398.585	471.012	471.606
ENSG00000058453	9696	CROCC	ciliary rootlet coiled-coil, rootletin	40.8963	43.1073	58.4405	127.898	56.396	41.3609	46.5492	35.1122	13.9179	15.9077	27.2568	25.9353
ENSG00000058600	55718	POLR3E	RNA polymerase III subunit E	24.7116	30.1	36.994	40.5655	34.2802	17.4691	26.6191	34.1204	17.696	21.9697	26.076	27.8796
ENSG00000058668	493	ATP2B4	ATPase plasma membrane Ca2+ transporting 4	194.224	196.762	158.549	151.048	202.94	206.428	269.531	435.784	180.044	373.182	437.442	348.487
ENSG00000058673	9877	ZC3H11A	zinc finger CCCH-type containing 11A	76.3827	75.9993	93.1929	132.893	92.292	59.1857	56.9283	58.4948	28.4748	36.5199	65.5439	55.3826
ENSG00000058729	55781	RIOK2	RIO kinase 2	28.835	20.8371	20.0916	20.033	15.7933	10.8999	9.53832	12.1872	12.6956	11.8147	12.0697	11.3848
ENSG00000058799	54432	YIPF1	Yip1 domain family member 1	22.4391	23.4236	17.3785	13.1084	16.9012	24.5822	17.2216	24.1265	39.6424	29.0427	25.8032	23.4425
ENSG00000058804	55706	NDC1	NDC1 transmembrane nucleoporin	59.9077	60.2098	48.0971	38.7397	38.1438	15.628	15.868	20.3883	17.9738	15.7219	18.1523	15.8748
ENSG00000058866	1608	DGKG	diacylglycerol kinase gamma	1.26205	2.33262	2.74902	1.60195	3.21629	36.6328	32.5883	55.6721	24.5855	34.5072	46.6717	44.8594
ENSG00000059122	84256	FLYWCH1	FLYWCH-type zinc finger 1	43.1178	49.6982	47.0566	55.7582	50.1833	76.0899	69.1497	69.2135	69.8673	55.7233	66.4381	71.2317
ENSG00000059145	64718	UNKL	unk like zinc finger	18.8409	21.4105	27.6948	41.1512	28.7703	33.7457	35.7268	29.543	18.4739	21.5751	29.6704	29.695
ENSG00000059377	6916	TBXAS1	thromboxane A synthase 1	1.31957	1.2266	0.939692	1.01629	2.58832	8.89145	3.51344	4.67272	6.58392	8.37514	2.70582	4.15012
ENSG00000059378	64761	PARP12	poly(ADP-ribose) polymerase family member 12	0.971855	1.53488	1.27424	2.73882	3.09939	17.0507	8.65826	5.74077	7.63957	7.04461	4.41639	7.11629
ENSG00000059573	5832	ALDH18A1	aldehyde dehydrogenase 18 family member A1	88.9443	76.1257	82.1544	56.8262	63.4715	57.4702	40.2771	32.5565	25.5856	40.7441	32.5159	32.8872
ENSG00000059588	6894	TARBP1	TAR (HIV-1) RNA binding protein 1	4.01828	7.04211	12.3047	30.9194	13.8093	27.1765	23.7762	10.6233	11.1399	10.365	22.1664	25.1755
ENSG00000059691	5188	GATB	glutamyl-tRNA amidotransferase subunit B	31.4553	29.8952	24.549	22.479	21.4404	30.1891	23.6485	38.1637	53.4214	37.9134	33.3943	49.1214
ENSG00000059728	4084	MXD1	MAX dimerization protein 1	40.8647	28.4651	24.4884	19.9641	24.4185	21.1094	19.5284	22.6389	13.4734	25.9491	23.6706	18.7057
ENSG00000059758	5128	CDK17	cyclin dependent kinase 17	118.429	91.7694	85.6936	86.1781	79.1796	52.0307	73.5179	168.084	85.0909	150.232	139.51	122.839
ENSG00000059769	548645	DNAJC25	DnaJ heat shock protein family (Hsp40) member C25	3.663	4.96476	4.40147	6.18388	3.97216	5.29303	6.75451	6.46552	8.13961	6.37675	7.09809	6.38379
ENSG00000059804	6515	SLC2A3	solute carrier family 2 member 3	103.611	38.0627	44.4558	19.1717	36.9068	106.718	60.6256	111.897	64.7558	96.071	108.077	80.9084
ENSG00000059915	5662	PSD	pleckstrin and Sec7 domain containing	142.137	222.814	233.909	221.155	225.87	478.653	640.354	766.04	1233.53	614.895	598.983	721.029
ENSG00000060069	9150	CTDP1	CTD phosphatase subunit 1	24.1773	27.9888	27.933	27.1298	21.5895	18.9336	20.3622	21.0368	14.0846	15.4881	17.4926	16.9418
ENSG00000060138	8531	YBX3	Y-box binding protein 3	23.9882	15.4063	14.79	23.3747	10.5904	96.5925	24.5563	9.05936	14.1401	14.2302	8.25731	11.2226
ENSG00000060140	55359	STYK1	serine/threonine/tyrosine kinase 1	1.38285	2.30581	2.37989	2.32541	3.3269	1.35987	4.369	15.4677	7.75069	6.4482	11.1933	11.0674
ENSG00000060237	65125	WNK1	WNK lysine deficient protein kinase 1	185.057	184.543	253.294	189.805	259.054	203.918	248.831	439.217	104.815	545.402	457.059	471.348
ENSG00000060303	---	---	---	0	0	0	0	0	0	0	0	0.527825	0	0	0
ENSG00000060339	55749	CCAR1	cell division cycle and apoptosis regulator 1	64.5047	48.4153	72.653	87.0049	57.3292	28.1388	31.911	31.6029	29.2526	27.9325	33.1828	29.866
ENSG00000060491	11054	OGFR	opioid growth factor receptor	36.5178	45.3801	50.7782	62.3383	45.1843	50.5244	61.7075	59.6392	42.8094	40.0412	51.8498	50.8226
ENSG00000060558	2769	GNA15	G protein subunit alpha 15	0	0.541297	0.450249	0.430632	1.51412	4.62355	4.39637	4.40571	10.1398	6.87227	5.84054	4.2982
ENSG00000060566	84699	CREB3L3	cAMP responsive element binding protein 3 like 3	0	0	0	0	0	0	0	1.16341	0	0	0	0.592036
ENSG00000060642	55650	PIGV	phosphatidylinositol glycan anchor biosynthesis class V	7.52248	6.42727	5.61453	6.76953	8.24246	19.5194	10.7832	11.9584	14.8624	12.1507	16.6643	14.818
ENSG00000060656	10076	PTPRU	protein tyrosine phosphatase receptor type U	25.9241	20.6002	47.4056	17.587	19.7729	61.9891	43.1564	66.696	39.6424	35.1295	38.9749	43.3796
ENSG00000060688	9410	SNRNP40	small nuclear ribonucleoprotein U5 subunit 40	59.8532	49.4117	42.1464	37.6028	32.9349	19.0172	17.7729	19.1296	23.641	22.3346	16.8718	20.1128
ENSG00000060709	23504	RIMBP2	RIMS binding protein 2	11.7412	15.9297	26.7432	40.7033	51.4409	32.4486	46.5005	150.576	37.0311	78.3455	76.4477	82.6286
ENSG00000060718	1301	COL11A1	collagen type XI alpha 1 chain	72.6003	67.8074	75.1808	55.6204	62.6542	48.6833	48.2545	19.511	6.63948	8.81138	17.0705	13.6982
ENSG00000060749	79832	QSER1	glutamine and serine rich 1	101.462	98.3624	117.264	99.097	114.711	36.8838	32.9385	29.7338	14.918	20.9259	28.7449	19.8902
ENSG00000060762	51660	MPC1	mitochondrial pyruvate carrier 1	24.7996	34.6529	27.7855	33.6754	37.6528	65.1273	62.5903	45.7164	217.992	65.0199	61.0062	75.6378
ENSG00000060971	30	ACAA1	acetyl-CoA acyltransferase 1	22.0251	22.4827	22.3147	32.3663	29.6105	59.1857	43.5952	44.9153	45.254	47.3691	43.5284	53.3837
ENSG00000060982	586	BCAT1	branched chain amino acid transaminase 1	118.878	80.6047	66.7635	37.3961	37.6094	28.5991	39.0947	45.2205	19.6406	36.6148	32.7581	32.5321
ENSG00000061273	51564	HDAC7	histone deacetylase 7	29.156	35.9531	39.6255	54.1391	46.7641	78.1402	35.4241	19.3966	14.7513	16.7258	19.1454	25.509
ENSG00000061337	11178	LZTS1	leucine zipper tumor suppressor 1	102.33	120.001	146.034	109.122	112.86	56.717	103.026	106.748	44.0317	106.118	126.71	103.802
ENSG00000061455	93166	PRDM6	PR/SET domain 6	0.540963	0	0	0.809588	0.47197	0	0.656836	0.438664	0.416704	0	0.703882	0.659661
ENSG00000061492	7478	WNT8A	Wnt family member 8A	0	0	0	0	0	0	0	0.400519	0	0	0.412307	0
ENSG00000061656	6676	SPAG4	sperm associated antigen 4	0	0.54573	0	0.671786	0.898117	19.5194	1.43529	0.553098	1.63903	0.584285	0.616003	1.17837
ENSG00000061676	10787	NCKAP1	NCK associated protein 1	314.393	330.134	317.989	223.429	304.209	215.466	251.39	513.103	318.056	394.401	373.512	345.832
ENSG00000061794	60488	MRPS35	mitochondrial ribosomal protein S35	56.3271	59.4982	46.9641	42.5637	50.0934	34.9591	34.0815	41.8256	83.9797	55.9521	39.8418	42.7232
ENSG00000061918	2983	GUCY1B1	guanylate cyclase 1 soluble subunit beta 1	49.2571	56.1992	45.2099	38.1195	34.4762	38.0136	77.5693	165.452	174.321	171.239	145.258	166.527
ENSG00000061936	6433	SFSWAP	splicing factor SWAP	36.6532	33.2862	52.0626	74.6371	48.2073	44.6246	40.2582	28.208	15.9736	18.9079	33.9457	37.6441
ENSG00000061938	10188	TNK2	tyrosine kinase non receptor 2	22.4426	33.4443	49.6042	86.5915	58.9423	174.712	295.155	185.021	127.261	195.544	207.404	249.732
ENSG00000061987	23041	MON2	MON2 homolog, regulator of endosome-to-Golgi trafficking	36.6274	37.3025	43.0836	45.492	44.3903	31.4025	33.4203	48.6154	25.919	37.8244	50.5849	47.5393
ENSG00000062038	1001	CDH3	cadherin 3	7.94617	7.73802	10.8221	11.0414	12.534	14.038	13.1968	10.8522	5.13935	4.41252	5.56605	5.57271
ENSG00000062096	416	ARSF	arylsulfatase F	0.760752	2.1582	1.59156	2.73882	5.46745	2.36408	6.0792	3.49024	7.41733	8.82493	4.95969	4.51727
ENSG00000062194	65056	GPBP1	GC-rich promoter binding protein 1	198.842	189.259	162.69	168.205	149.165	89.6468	88.2087	95.8766	71.0341	92.7903	108.358	91.8677
ENSG00000062282	84649	DGAT2	diacylglycerol O-acyltransferase 2	2.2773	3.305	3.52834	2.39431	3.29927	8.38935	10.2969	18.6337	15.8625	9.47164	14.4138	15.1027
ENSG00000062370	7771	ZNF112	zinc finger protein 112	12.854	12.5324	15.583	17.587	14.1836	3.20092	5.86498	5.1686	4.25038	3.97279	6.97867	4.29633
ENSG00000062485	1431	CS	citrate synthase	221.227	170.247	193.364	141.23	172.739	109.103	123.66	145.083	81.924	137.048	147.983	132.764
ENSG00000062524	4058	LTK	leukocyte receptor tyrosine kinase	0	0	0	1.15409	0	2.48961	0	0.972689	0.638946	0.409314	0.823046	1.6239
ENSG00000062582	64951	MRPS24	mitochondrial ribosomal protein S24	0.464541	0.408111	0.44859	0	0	1.06697	0.570674	0.781966	1.41679	0.690705	0	0.453252
ENSG00000062598	63916	ELMO2	engulfment and cell motility 2	80.4676	93.6535	89.6112	88.7963	108.89	89.9815	113.425	138.408	85.2576	96.6601	135.587	132.23
ENSG00000062650	23063	WAPL	WAPL cohesin release factor	105.391	78.772	94.4606	70.7098	74.2294	30.6494	34.8018	41.9401	20.5296	31.5738	39.9784	33.9367
ENSG00000062716	81671	VMP1	vacuole membrane protein 1	67.6129	69.8618	55.2857	43.2182	50.5536	69.0186	42.1235	59.8681	78.4792	93.1606	56.5499	55.2696
ENSG00000062725	10513	APPBP2	amyloid beta precursor protein binding protein 2	109.31	99.1694	87.7975	75.085	86.5436	37.2604	53.0184	73.1805	50.1434	76.889	77.1387	65.9571
ENSG00000062822	5424	POLD1	DNA polymerase delta 1, catalytic subunit	53.0079	30.0968	37.6166	39.7043	20.4214	15.6699	9.43118	6.77068	5.02823	4.00987	4.94248	6.04123
ENSG00000063015	124925	SEZ6	seizure related 6 homolog	149.341	287.161	303.475	196.144	416.896	68.2654	139.975	189.102	71.2008	121.425	138.818	141.502
ENSG00000063046	1975	EIF4B	eukaryotic translation initiation factor 4B	548.652	402.273	502.466	446.118	408.285	246.973	121.55	135.89	99.2033	203.578	165.991	151.717
ENSG00000063127	28968	SLC6A16	solute carrier family 6 member 16	0.573535	0.763725	0.879	0.878489	0.812664	3.70303	2.11015	1.04898	1.13899	0.884402	1.25846	1.14275
ENSG00000063169	29998	BICRA	BRD4 interacting chromatin remodeling complex associated protein	28.2544	34.9226	48.668	49.3849	36.9063	28.8501	36.0947	30.4585	13.6957	17.7946	19.4361	21.7358
ENSG00000063176	56848	SPHK2	sphingosine kinase 2	13.7355	20.4481	22.2148	20.7909	22.8377	23.2015	38.5678	37.9349	37.1422	36.3458	32.0152	38.3765
ENSG00000063177	6141	RPL18	ribosomal protein L18	912.606	1072.59	831.92	803.955	759.63	1576.34	518.468	290.376	1163.58	380.931	251.533	338.294
ENSG00000063180	770	CA11	carbonic anhydrase 11	28.2109	28.0552	28.5887	19.2062	25.1243	79.9812	288.972	385.624	925.332	517.328	445.362	438.773
ENSG00000063241	79763	ISOC2	isochorismatase domain containing 2	14.8821	21.339	13.3584	13.9008	15.6804	51.9052	40.4236	37.973	72.2009	33.4006	27.7739	37.1421
ENSG00000063244	11338	U2AF2	U2 small nuclear RNA auxiliary factor 2	253.673	236.047	259.03	214.92	219.19	134.962	139.831	125.744	106.371	112.863	106.046	107.905
ENSG00000063245	29924	EPN1	epsin 1	188.647	203.937	212.589	185.602	202.093	252.957	247.418	271.762	238.382	240.581	203.744	241.521
ENSG00000063322	55588	MED29	mediator complex subunit 29	38.8815	44.9095	37.7184	33.6754	52.3688	120.777	74.8849	81.8394	64.0335	69.0703	70.9295	83.5006
ENSG00000063438	---	---	---	1.10524	3.01969	2.5863	2.29096	2.60417	3.0754	4.31794	4.06241	1.41679	2.70044	4.5231	4.14699
ENSG00000063587	10838	ZNF275	zinc finger protein 275	28.6201	29.4494	27.7832	26.7853	34.1487	52.1981	43.7837	34.6163	13.3623	37.8269	33.948	29.9212
ENSG00000063601	8776	MTMR1	myotubularin related protein 1	81.1395	62.8147	67.435	46.6633	62.0573	40.6496	43.7675	52.201	23.8077	44.2833	43.8806	42.2862
ENSG00000063660	2817	GPC1	glypican 1	393.406	340.206	318.812	282.098	259.362	274.882	327.153	173.539	144.374	106.326	157.256	192.019
ENSG00000063761	57143	ADCK1	aarF domain containing kinase 1	5.67471	8.56406	8.68533	7.87195	11.3564	9.18435	17.6032	23.7832	17.5849	16.8727	21.1554	20.0148
ENSG00000063854	3029	HAGH	hydroxyacylglutathione hydrolase	35.7354	38.4483	38.6691	29.817	41.2573	54.2065	86.2055	113.156	173.821	115.693	94.8151	107.534
ENSG00000063978	6047	RNF4	ring finger protein 4	67.1045	72.2571	65.564	58.4454	65.4571	56.4241	54.1966	56.9691	35.2531	53.9836	55.914	56.2385
ENSG00000064012	841	CASP8	caspase 8	0.444209	0.617905	0	0	1.19643	2.15487	1.35574	1.04898	0.750067	0.858811	1.35265	1.53996
ENSG00000064042	22998	LIMCH1	LIM and calponin homology domains 1	101.806	121.631	202.122	75.3606	99.5102	79.5628	108.794	185.669	95.2585	201.528	235.936	205.861
ENSG00000064102	55726	INTS13	integrator complex subunit 13	24.0378	21.1472	21.7153	19.1028	16.6397	11.5275	11.2807	11.6532	13.2512	14.5974	12.5049	11.2037
ENSG00000064115	51768	TM7SF3	transmembrane 7 superfamily member 3	34.5586	35.7892	29.8135	22.7201	28.9232	40.2312	41.5556	50.637	56.0328	51.2329	38.1942	38.9582
ENSG00000064199	53340	SPA17	sperm autoantigenic protein 17	4.44743	3.53994	2.0174	1.7742	2.59708	3.49382	3.85271	3.29951	5.36159	3.39831	3.53617	3.15333
ENSG00000064201	10077	TSPAN32	tetraspanin 32	0.785351	1.08764	1.23383	1.11964	0.953509	1.40171	1.25094	1.69744	0	0.715748	0.852538	0.910384
ENSG00000064205	8839	CCN5	cellular communication network factor 5	0	0	0	0	0	0.98329	0	0	0	1.12612	0.839169	0.995401
ENSG00000064218	58524	DMRT3	doublesex and mab-3 related transcription factor 3	1.65834	0.461504	0	0	0	1.73645	0	0.629387	0	0	0	0
ENSG00000064225	10402	ST3GAL6	ST3 beta-galactoside alpha-2,3-sialyltransferase 6	4.46529	13.9775	9.9258	12.2816	11.1227	12.4062	12.1562	17.2605	17.0293	11.7666	13.2493	10.7595
ENSG00000064270	9914	ATP2C2	ATPase secretory pathway Ca2+ transporting 2	1.08401	1.59509	3.56946	5.28816	2.737	7.21777	8.11655	4.02426	5.86163	5.30721	6.11943	5.99486
ENSG00000064300	4804	NGFR	nerve growth factor receptor	4.02356	3.38922	7.70179	5.46041	14.7236	13.9125	6.42155	4.40571	2.02796	3.75782	2.76936	7.84139
ENSG00000064309	50937	CDON	cell adhesion associated, oncogene regulated	23.194	10.5532	30.4632	13.074	15.3916	3.70303	4.23103	8.52533	3.25029	2.63361	6.22398	4.61049
ENSG00000064313	6873	TAF2	TATA-box binding protein associated factor 2	56.1967	49.7038	50.667	44.2173	48.4067	15.5443	22.0308	23.7832	7.36177	19.3074	20.1892	18.0448
ENSG00000064393	28996	HIPK2	homeodomain interacting protein kinase 2	205.347	161.284	212.357	190.77	200.317	318.691	494.138	809.144	201.824	997.883	903.442	775.309
ENSG00000064419	23534	TNPO3	transportin 3	147.286	94.9941	122.26	95.6175	97.8791	31.6536	35.2436	50.5226	10.9176	34.6032	40.7471	37.2976
ENSG00000064490	8625	RFXANK	regulatory factor X associated ankyrin containing protein	19.5896	22.6483	16.9637	16.5535	18.885	40.9007	19.2362	12.4924	26.9746	15.3507	13.1817	14.2511
ENSG00000064545	54929	TMEM161A	transmembrane protein 161A	13.8488	15.377	12.8505	11.9027	15.6098	27.6786	21.4256	18.7862	15.418	16.1437	17.8702	17.3723
ENSG00000064547	9170	LPAR2	lysophosphatidic acid receptor 2	28.4455	38.5375	45.8003	115.323	59.9352	19.6449	7.0258	3.52838	3.47253	2.62827	3.03453	3.71958
ENSG00000064601	5476	CTSA	cathepsin A	11.3212	16.379	15.1607	22.1689	25.2116	86.3412	63.2091	50.7515	52.588	60.7169	53.8581	61.5149
ENSG00000064607	10147	SUGP2	SURP and G-patch domain containing 2	159.113	127.265	163.811	167.757	134.744	55.3781	103.094	124.18	47.2542	77.5878	115.716	105.556
ENSG00000064651	6558	SLC12A2	solute carrier family 12 member 2	24.6517	22.4786	23.8356	19.5162	30.2434	17.5946	40.5941	73.2187	43.4205	84.6804	110.582	86.0617
ENSG00000064652	28966	SNX24	sorting nexin 24	10.1027	9.47267	8.23625	8.59541	7.44688	9.47724	10.2627	12.4542	11.0288	13.3452	12.7622	12.3707
ENSG00000064655	2139	EYA2	EYA transcriptional coactivator and phosphatase 2	8.37554	11.059	5.05583	3.53118	5.2167	20.0633	12.99	5.13046	6.13944	10.2928	9.75	8.86368
ENSG00000064666	1265	CNN2	calponin 2	48.7817	48.2584	30.6958	10.8347	21.3634	34.6662	10.0146	3.0325	3.80589	3.46385	2.80976	3.32797
ENSG00000064687	10347	ABCA7	ATP binding cassette subfamily A member 7	2.30051	1.74262	3.27559	1.73975	2.67629	7.76171	12.348	15.2007	9.86199	7.28531	9.9782	15.6642
ENSG00000064692	9627	SNCAIP	synuclein alpha interacting protein	77.8644	89.5662	81.2415	75.5673	73.2775	22.4483	23.1882	13.5986	5.47271	7.20519	7.06201	6.84583
ENSG00000064703	11218	DDX20	DEAD-box helicase 20	34.4054	27.7632	26.8388	28.8179	21.1603	5.79513	8.97493	16.9934	14.7513	12.391	12.1	11.4686
ENSG00000064726	53339	BTBD1	BTB domain containing 1	89.5365	94.072	91.2728	78.0822	97.8169	72.8681	103.271	171.212	115.76	131.198	128.271	115.729
ENSG00000064763	55711	FAR2	fatty acyl-CoA reductase 2	23.1451	30.434	27.6364	18.7239	28.8208	11.1928	19.8804	38.4308	19.085	25.8664	19.554	21.9892
ENSG00000064787	8537	BCAS1	breast carcinoma amplified sequence 1	0	1.901	2.0595	4.15129	10.6931	70.5249	155.436	298.349	461.791	498.441	346.895	410.949
ENSG00000064886	1117	CHI3L2	chitinase 3 like 2	0	0	0	0	0	1.69461	0.485116	1.43043	6.25056	1.44295	1.31013	1.9138
ENSG00000064932	22904	SBNO2	strawberry notch homolog 2	14.6416	13.8427	21.9036	27.4054	21.5695	57.7212	20.9141	16.6501	8.36186	9.01676	10.2939	13.7676
ENSG00000064933	5378	PMS1	PMS1 homolog 1, mismatch repair system component	19.3132	19.8842	21.3565	32.2629	19.2879	12.2807	12.7145	12.9501	10.9732	12.1351	12.2917	11.6248
ENSG00000064961	10362	HMG20B	high mobility group 20B	34.8383	36.8166	29.3786	44.8374	26.8573	49.6457	31.0966	19.8543	33.6974	19.6757	16.8042	19.8953
ENSG00000064989	10203	CALCRL	calcitonin receptor like receptor	4.56099	5.75797	2.91862	3.60008	3.83046	18.5151	14.9398	9.51709	10.6954	15.2476	11.8223	8.14202
ENSG00000064995	6882	TAF11	TATA-box binding protein associated factor 11	22.007	26.5491	20.934	23.4092	21.6933	15.9209	13.5451	12.2635	29.5304	14.7342	12.353	13.7327
ENSG00000064999	23294	ANKS1A	ankyrin repeat and sterile alpha motif domain containing 1A	112.249	88.167	87.2548	55.8271	55.6511	51.3194	53.1861	47.8906	24.1966	21.6013	34.0833	41.8593
ENSG00000065000	8943	AP3D1	adaptor related protein complex 3 subunit delta 1	188.668	169.289	214.905	175.75	203.279	190.57	221.854	285.379	119.372	172.559	221.156	202.666
ENSG00000065029	7629	ZNF76	zinc finger protein 76	23.6011	21.5331	23.344	24.6494	23.0317	36.0888	30.9035	24.5461	32.9752	18.8848	24.5903	30.6641
ENSG00000065054	9351	SLC9A3R2	SLC9A3 regulator 2	12.1399	15.5257	14.3601	12.1094	20.8313	196.009	99.7023	60.898	115.316	54.8194	55.7974	74.4469
ENSG00000065057	4913	NTHL1	nth like DNA glycosylase 1	15.9347	18.323	16.8078	14.0386	15.0828	18.9754	18.6246	15.3151	33.6974	14.2235	14.3299	15.7543
ENSG00000065060	54887	UHRF1BP1	UHRF1 binding protein 1	46.3085	32.3354	35.6253	32.2629	26.0927	17.8457	17.6867	18.6337	8.52854	15.5032	18.3843	15.6462
ENSG00000065135	2773	GNAI3	G protein subunit alpha i3	189.078	194.478	167.556	145.364	148.596	72.0312	41.5632	27.9028	32.6974	32.7035	33.4381	28.3975
ENSG00000065150	3843	IPO5	importin 5	535.479	370.726	361.976	263.633	290.598	140.945	119.689	179.108	116.816	172.544	177.5	156.057
ENSG00000065154	4942	OAT	ornithine aminotransferase	50.1522	79.264	61.9548	71.7433	121.025	145.339	160.156	179.909	163.376	141.29	176.534	185.456
ENSG00000065183	10885	WDR3	WD repeat domain 3	63.9542	51.1133	53.3735	44.1828	45.868	19.5612	20.1466	28.7039	8.80634	20.4749	21.6045	17.267
ENSG00000065243	5586	PKN2	protein kinase N2	47.4457	43.2455	42.7607	51.9342	35.6672	23.9965	19.2269	21.1512	13.7512	18.1668	23.0823	19.1036
ENSG00000065268	57418	WDR18	WD repeat domain 18	63.2827	59.1987	51.5286	38.9464	53.7316	61.7381	45.7461	41.2535	46.143	33.1541	26.7184	29.459
ENSG00000065308	9697	TRAM2	translocation associated membrane protein 2	14.6084	12.7784	10.4478	9.11217	10.607	32.2812	11.1933	6.88511	4.75042	4.72206	4.72281	6.79318
ENSG00000065320	9423	NTN1	netrin 1	37.2768	23.721	35.9924	16.6913	22.2099	38.8086	52.6192	27.6358	11.3621	19.736	17.0645	12.399
ENSG00000065325	9340	GLP2R	glucagon like peptide 2 receptor	0	0	0	0	0	0	0	3.14694	0.638946	0.523033	0.738583	1.57034
ENSG00000065328	55388	MCM10	minichromosome maintenance 10 replication initiation factor	34.8273	15.3465	16.5653	15.1755	4.74658	0	0.448715	0.476808	0	0	0	0
ENSG00000065357	1606	DGKA	diacylglycerol kinase alpha	2.81622	4.87526	4.64795	11.1103	12.4683	18.8499	14.7917	22.7152	12.0288	21.8553	21.5832	24.2521
ENSG00000065361	2065	ERBB3	erb-b2 receptor tyrosine kinase 3	1.03806	1.447	1.82768	2.46321	3.27204	16.7578	28.3549	42.7792	36.4755	53.2304	66.7711	74.8924
ENSG00000065371	54763	ROPN1	rhophilin associated tail protein 1	0	0	0	0	0	0	0	0	0.416704	0	0	0
ENSG00000065413	91526	ANKRD44	ankyrin repeat domain 44	13.1316	12.3224	19.3739	13.7285	18.718	7.38514	9.03407	9.32637	1.63903	4.60576	5.82406	5.1767
ENSG00000065427	3735	KARS	lysyl-tRNA synthetase	200.268	155.859	154.348	122.282	122.515	103.58	71.6101	67.1918	75.3678	94.8285	73.6745	74.7797
ENSG00000065457	23536	ADAT1	adenosine deaminase tRNA specific 1	11.3677	6.52158	9.11777	7.4241	6.69151	5.25119	5.2807	7.3047	3.19473	5.3002	7.21018	6.28747
ENSG00000065485	10954	PDIA5	protein disulfide isomerase family A member 5	3.70957	3.96795	3.40448	5.15036	3.61236	5.37671	1.87643	1.2397	1.58347	1.6309	0.991207	1.65827
ENSG00000065491	55633	TBC1D22B	TBC1 domain family member 22B	31.3765	33.6417	27.4438	26.4408	34.1259	23.0759	26.7929	32.175	20.4185	23.4142	26.4096	22.8487
ENSG00000065518	4710	NDUFB4	NADH:ubiquinone oxidoreductase subunit B4	67.7689	79.3311	54.9011	49.2815	57.4817	75.8807	55.5417	52.1247	222.659	105.942	68.0987	74.6374
ENSG00000065526	23013	SPEN	spen family transcriptional repressor	155.803	206.931	312.839	307.385	245.145	121.907	142.495	132.267	26.9746	93.9229	126.765	93.6661
ENSG00000065534	4638	MYLK	myosin light chain kinase	7.42791	3.5668	7.23987	3.46228	6.97662	74.9183	54.2524	61.3176	46.9764	132.001	77.3194	81.7036
ENSG00000065548	55854	ZC3H15	zinc finger CCCH-type containing 15	73.2312	73.4272	72.662	70.9854	65.5336	41.2354	53.4892	83.2507	128.539	92.3948	76.9742	73.7681
ENSG00000065559	6416	MAP2K4	mitogen-activated protein kinase kinase 4	47.701	58.8939	49.4658	47.559	49.6615	34.3315	75.778	200.965	120.872	130.486	172.685	137.162
ENSG00000065600	55248	TMEM206	transmembrane protein 206	36.4352	40.2856	41.0522	28.1289	31.3696	24.9588	23.986	32.3658	49.5877	31.7069	38.2975	39.1669
ENSG00000065609	9892	SNAP91	synaptosome associated protein 91	128.716	137.413	169.705	129.655	189.421	101.739	230.372	503.491	381.228	415.139	342.224	321.458
ENSG00000065613	9748	SLK	STE20 like kinase	72.9805	44.9602	57.6127	64.991	47.7105	43.2438	56.3439	79.1311	33.3085	57.9684	79.8184	70.1458
ENSG00000065615	51167	CYB5R4	cytochrome b5 reductase 4	13.6219	16.0667	14.8682	13.2118	13.8407	7.13408	6.85351	8.63977	8.91746	6.9165	6.98358	7.16797
ENSG00000065618	1308	COL17A1	collagen type XVII alpha 1 chain	0	0	0	0	0	1.52724	1.04581	0.400519	1.19455	1.25923	1.26959	1.75589
ENSG00000065621	119391	GSTO2	glutathione S-transferase omega 2	7.30126	9.74524	7.86753	3.49673	8.51835	7.88724	8.81816	8.48719	7.91737	8.89711	7.20378	10.0278
ENSG00000065665	55176	SEC61A2	SEC61 translocon alpha 2 subunit	42.9564	42.8683	48.4274	34.5711	46.2387	29.8125	48.8904	73.0661	60.5887	83.9672	62.0795	63.1512
ENSG00000065675	5588	PRKCQ	protein kinase C theta	2.40766	4.12652	4.25919	2.56657	5.69671	4.87461	6.86331	13.9419	11.6399	11.9082	13.7909	14.1924
ENSG00000065717	7089	TLE2	TLE family member 2, transcriptional corepressor	35.9482	43.0606	38.1348	43.1838	40.1213	117.095	56.9051	23.3255	47.4209	27.6707	31.3119	32.616
ENSG00000065802	51665	ASB1	ankyrin repeat and SOCS box containing 1	39.7686	38.451	44.5793	49.9361	47.4426	27.5112	71.6743	87.6755	39.8091	95.6211	91.228	98.2281
ENSG00000065809	83641	FAM107B	family with sequence similarity 107 member B	150.004	164.397	137.406	152.289	141.25	36.2144	34.7223	73.9434	65.7559	138.395	122.721	119.543
ENSG00000065833	4199	ME1	malic enzyme 1	2.76954	4.01073	3.99946	2.97997	7.055	19.6449	22.1439	34.8833	46.0319	52.5722	49.1231	49.5998
ENSG00000065882	23216	TBC1D1	TBC1 domain family member 1	59.8402	47.0303	64.9258	75.6018	70.2892	55.0852	35.3719	38.1256	16.2514	30.2999	29.9295	33.6415
ENSG00000065883	8621	CDK13	cyclin dependent kinase 13	62.2343	54.9613	72.2162	69.0906	59.3752	32.4067	40.6531	39.6514	21.8631	31.9908	38.9755	38.3422
ENSG00000065911	10797	MTHFD2	methylenetetrahydrofolate dehydrogenase (NADP+ dependent) 2, methenyltetrahydrofolate cyclohydrolase	20.3644	16.1678	17.2748	11.9371	10.7137	10.4396	3.78105	3.64282	4.25038	5.41315	3.0537	3.44625
ENSG00000065923	84679	SLC9A7	solute carrier family 9 member A7	8.04376	8.00581	12.5451	6.56283	11.2965	8.3475	11.9212	30.0389	2.528	10.904	14.6188	11.5602
ENSG00000065970	55810	FOXJ2	forkhead box J2	60.479	53.8016	65.6878	53.0711	65.2387	32.2812	38.0499	38.5452	20.5852	28.819	33.5678	28.6346
ENSG00000065978	4904	YBX1	Y-box binding protein 1	1565.55	1313.31	1421.74	1140.12	1053.87	626.439	269.567	129.444	221.659	192.302	92.4967	97.8838
ENSG00000065989	5141	PDE4A	phosphodiesterase 4A	17.2598	16.9336	22.3825	14.1075	18.9569	67.7215	71.7136	67.8784	44.9762	57.3984	57.8471	63.2481
ENSG00000066027	5525	PPP2R5A	protein phosphatase 2 regulatory subunit B'alpha	13.4678	16.7959	19.0522	26.5442	36.8854	69.8973	57.8121	52.8113	62.3667	49.6858	59.9988	60.0565
ENSG00000066032	1496	CTNNA2	catenin alpha 2	225.723	189.523	195.106	151.979	190.591	232.119	237.787	258.03	158.431	199.198	236.776	211.745
ENSG00000066044	1994	ELAVL1	ELAV like RNA binding protein 1	172.636	144.265	138.771	91.0356	126.886	69.8554	72.9888	86.6075	38.5868	66.4043	74.0999	64.49
ENSG00000066056	7075	TIE1	tyrosine kinase with immunoglobulin like and EGF like domains 1	24.496	16.8527	14.7702	11.9027	26.2624	61.6962	43.0669	31.4884	25.53	11.6853	15.5913	19.5403
ENSG00000066084	57609	DIP2B	disco interacting protein 2 homolog B	152.715	104.771	130.005	98.6147	117.229	69.7299	63.5161	96.5251	39.8091	104.388	125.313	108.188
ENSG00000066117	6602	SMARCD1	SWI/SNF related, matrix associated, actin dependent regulator of chromatin, subfamily d, member 1	186.169	162.358	152.463	213.921	177.483	63.2025	60.3401	48.3865	33.6419	43.6601	52.372	51.848
ENSG00000066135	9682	KDM4A	lysine demethylase 4A	141.987	117.134	131.999	97.8913	114.03	34.8754	39.8223	41.4823	14.9736	23.4705	32.3319	30.8231
ENSG00000066136	4802	NFYC	nuclear transcription factor Y subunit gamma	92.517	90.2079	82.1296	60.8569	76.6557	66.8428	50.5652	43.1225	43.0316	46.4428	46.5057	45.3973
ENSG00000066185	84217	ZMYND12	zinc finger MYND-type containing 12	0	0	0	0	0.695167	8.13829	2.60151	3.52838	4.30594	2.22065	3.05518	3.62661
ENSG00000066230	6550	SLC9A3	solute carrier family 9 member A3	1.56606	1.4168	3.2506	2.66992	2.7089	2.65697	3.85667	2.53662	1.13899	1.43659	2.01793	1.65126
ENSG00000066248	25791	NGEF	neuronal guanine nucleotide exchange factor	82.5934	72.1127	91.3769	63.7852	60.6398	85.337	147.996	263.789	198.157	160.958	161.218	198.205
ENSG00000066279	259266	ASPM	abnormal spindle microtubule assembly	97.927	51.4321	52.4092	58.3076	10.4314	2.99171	2.25126	1.2397	0	0	0	0
ENSG00000066294	8832	CD84	CD84 molecule	0	0.668744	0	0.809588	3.42594	1.44355	0.85889	2.07888	1.52791	1.12183	0.740482	1.32086
ENSG00000066322	64834	ELOVL1	ELOVL fatty acid elongase 1	7.68463	10.9711	8.22955	9.93899	15.0759	35.7959	33.3916	75.7362	135.651	109.066	82.6234	111.278
ENSG00000066336	6688	SPI1	Spi-1 proto-oncogene	0.789339	1.66362	1.42888	1.87756	4.00268	22.9504	7.04844	7.34285	8.02849	9.23363	3.28247	5.70983
ENSG00000066379	30834	ZNRD1	zinc ribbon domain containing 1	10.9597	10.041	9.06384	9.83563	6.21053	8.26382	4.92233	4.1387	8.69522	4.63942	4.31226	4.8909
ENSG00000066382	744	MPPED2	metallophosphoesterase domain containing 2	85.7688	56.675	85.5294	44.3895	67.4128	20.1051	26.6626	25.0801	19.6962	24.0481	15.6802	22.0192
ENSG00000066422	27107	ZBTB11	zinc finger and BTB domain containing 11	51.59	45.6486	51.8938	41.8747	43.7064	18.7662	20.6046	38.1256	27.3635	33.3206	37.8162	35.0607
ENSG00000066427	4287	ATXN3	ataxin 3	12.0676	11.1884	13.2083	18.5861	12.8635	6.38092	8.68151	13.446	10.1398	10.6733	12.0506	9.3209
ENSG00000066455	9950	GOLGA5	golgin A5	36.69	36.4064	37.3505	35.3635	38.3842	25.4609	25.1164	31.9843	24.7522	34.153	32.9937	30.2526
ENSG00000066468	2263	FGFR2	fibroblast growth factor receptor 2	92.0926	59.2735	67.8376	53.6912	106.137	84.7094	104.394	89.0106	103.37	111.935	136.715	143.027
ENSG00000066557	55631	LRRC40	leucine rich repeat containing 40	52.6399	49.2751	46.6376	46.2843	50.8653	19.2265	21.0081	31.2596	25.4189	28.3473	20.7277	20.1959
ENSG00000066583	51015	ISOC1	isochorismatase domain containing 1	45.1273	41.787	29.0534	24.9939	29.8257	17.5946	24.9718	20.9224	16.7515	25.1982	24.8067	23.4099
ENSG00000066629	2009	EML1	EMAP like 1	49.9357	53.9754	101.105	72.1567	90.6541	27.6367	23.9008	40.4143	16.8626	20.0395	26.4178	36.1942
ENSG00000066651	60487	TRMT11	tRNA methyltransferase 11 homolog	14.6863	13.8219	11.7824	12.2816	10.5222	10.0212	7.48741	9.47895	7.0284	9.03963	10.6349	10.9229
ENSG00000066654	55623	THUMPD1	THUMP domain containing 1	24.4385	28.464	26.8756	29.2313	27.8461	11.8622	16.3178	17.6801	17.196	16.3209	20.9952	17.819
ENSG00000066697	91283	MSANTD3	Myb/SANT DNA binding domain containing 3	45.0903	34.3359	35.1498	36.6726	29.0222	15.4607	13.1612	13.8274	20.863	14.6107	13.3924	11.8474
ENSG00000066735	26153	KIF26A	kinesin family member 26A	83.6816	72.9215	97.3607	96.5821	74.8856	34.2896	23.8436	10.8522	4.25038	4.35954	4.13357	6.12731
ENSG00000066739	55102	ATG2B	autophagy related 2B	36.4176	45.4411	47.6373	54.897	53.6551	25.5028	41.4203	73.9434	20.7518	52.0657	61.7832	59.5125
ENSG00000066777	10565	ARFGEF1	ADP ribosylation factor guanine nucleotide exchange factor 1	51.4952	47.3031	73.2883	64.5087	72.0758	30.733	47.0614	73.1424	23.4743	39.3169	61.0121	44.0901
ENSG00000066827	57623	ZFAT	zinc finger and AT-hook domain containing	15.0407	11.7196	16.2364	10.8692	12.3874	7.51066	9.2731	10.3944	6.36168	7.53033	8.50772	7.68478
ENSG00000066855	9650	MTFR1	mitochondrial fission regulator 1	21.0859	20.2129	17.2339	15.0377	13.8418	6.50645	6.37775	6.23665	10.4732	7.18545	8.08419	8.12068
ENSG00000066923	10734	STAG3	stromal antigen 3	9.57668	12.0408	20.0184	28.6801	18.2959	13.8707	10.7772	11.8439	5.80607	11.3292	13.9041	14.9599
ENSG00000066926	2235	FECH	ferrochelatase	13.3888	14.5417	14.2834	16.4846	22.6599	47.5117	23.5246	34.0441	31.1417	33.1725	34.854	33.3383
ENSG00000066933	4649	MYO9A	myosin IXA	61.5231	56.1428	77.8082	71.4677	68.7392	34.8336	46.6155	86.4549	16.8071	39.8254	61.7816	49.0434
ENSG00000067048	8653	DDX3Y	DEAD-box helicase 3 Y-linked	63.1591	0	9.74773	0	59.0235	57.2191	38.5372	0	23.6966	31.8356	0	1.12972
ENSG00000067057	5214	PFKP	phosphofructokinase, platelet	57.7721	56.8744	79.2996	65.0254	74.9163	297.477	172.569	316.696	218.992	278.555	279.965	248.676
ENSG00000067064	3422	IDI1	isopentenyl-diphosphate delta isomerase 1	91.2979	91.4904	74.2737	65.9556	80.3564	36.5909	63.0985	68.9465	88.9246	78.7299	75.6855	61.8811
ENSG00000067066	6672	SP100	SP100 nuclear antigen	1.7033	1.36554	1.26208	1.73975	2.61145	18.8917	6.21457	5.09231	5.91719	3.29571	3.79041	5.32951
ENSG00000067082	1316	KLF6	Kruppel like factor 6	118.648	85.2903	115.781	75.1539	108.496	148.058	68.2943	37.3246	26.4746	33.2603	29.3976	25.1113
ENSG00000067113	8611	PLPP1	phospholipid phosphatase 1	5.4546	5.96647	6.44508	5.63267	9.00098	27.6786	18.0546	21.609	21.6408	31.6043	25.3989	28.2624
ENSG00000067141	4756	NEO1	neogenin 1	290.949	277.034	300.849	185.671	291.858	123.915	134.338	127.117	50.4212	139.83	154.909	130.47
ENSG00000067167	23471	TRAM1	translocation associated membrane protein 1	39.6425	35.7391	28.5257	26.9231	30.416	48.8088	30.6969	26.11	12.7511	38.2673	26.8953	24.9136
ENSG00000067177	5255	PHKA1	phosphorylase kinase regulatory subunit alpha 1	9.60938	8.13058	9.52166	7.18294	12.206	17.7201	21.8932	12.1491	7.86181	18.0868	22.3217	16.3949
ENSG00000067182	7132	TNFRSF1A	TNF receptor superfamily member 1A	13.0241	14.7997	12.4865	15.5544	28.19	138.769	35.1022	21.4182	26.1968	24.9353	20.8881	22.5895
ENSG00000067191	782	CACNB1	calcium voltage-gated channel auxiliary subunit beta 1	43.4685	60.2853	64.1987	59.9956	67.3611	54.2902	104.71	178.078	89.2024	125.622	145.494	128.119
ENSG00000067208	7813	EVI5	ecotropic viral integration site 5	12.7245	11.2637	12.5193	11.6271	14.5791	13.1175	14.2161	15.544	9.47307	15.1769	20.2651	15.7118
ENSG00000067221	9399	STOML1	stomatin like 1	41.3003	63.2009	47.4512	38.7397	42.0076	59.646	70.1753	108.846	157.764	97.0081	84.8491	90.672
ENSG00000067225	5315	PKM	pyruvate kinase M1/2	831.914	624.422	595.201	342.835	533.759	1374.62	886.323	1131.96	1161.69	1328.55	1162.11	1267.61
ENSG00000067248	54505	DHX29	DExH-box helicase 29	43.8481	43.8077	50.7642	52.7955	48.3903	13.5359	21.2347	30.0771	16.8071	24.1694	26.9726	25.0455
ENSG00000067334	30836	DNTTIP2	deoxynucleotidyltransferase terminal interacting protein 2	66.6028	53.1004	58.7339	65.9556	50.9867	31.9046	27.6679	30.8781	34.8642	34.3958	34.9727	28.2641
ENSG00000067365	79091	METTL22	methyltransferase like 22	6.41651	9.06074	9.38277	15.3477	10.8108	8.89145	6.38409	6.54181	10.751	3.42215	5.98592	8.20094
ENSG00000067369	7158	TP53BP1	tumor protein p53 binding protein 1	219.803	134.436	195.804	119.94	147.808	61.4452	83.3887	151.186	37.0866	69.7738	100.109	88.01
ENSG00000067445	7216	TRO	trophinin	129.596	125.705	124.246	145.915	128.327	61.1104	77.6755	105.756	43.865	54.8303	71.7423	75.3386
ENSG00000067533	51018	RRP15	ribosomal RNA processing 15 homolog	13.6023	18.8258	17.0445	21.3421	17.1732	6.63198	10.8164	10.6233	6.58392	15.1893	11.6824	8.03478
ENSG00000067560	387	RHOA	ras homolog family member A	358.611	334.291	278.476	255.227	321.501	553.801	307.309	278.323	465.014	402.351	301.267	316.697
ENSG00000067596	1659	DHX8	DEAH-box helicase 8	84.5938	56.7866	70.301	51.8309	57.7557	25.3772	30.6352	37.706	17.4738	24.6987	29.1852	31.3785
ENSG00000067601	5382	PMS2P4	PMS1 homolog 2, mismatch repair system component pseudogene 4	0.62152	0.690602	0.933916	1.22299	1.12881	1.27618	1.57649	1.73558	2.47244	2.00558	1.77332	1.81747
ENSG00000067606	5590	PRKCZ	protein kinase C zeta	53.0183	63.6625	67.6827	53.6567	57.7056	43.7459	102.156	179.642	170.376	198.067	135.689	140.94
ENSG00000067646	7544	ZFY	zinc finger protein Y-linked	15.8319	0	3.35476	0	15.1562	7.30145	8.81283	0	4.30594	11.4508	0	0
ENSG00000067704	55699	IARS2	isoleucyl-tRNA synthetase 2, mitochondrial	76.9789	65.294	76.3377	68.6772	71.5111	69.981	63.5587	84.3569	65.867	72.3859	79.1635	81.6494
ENSG00000067715	6857	SYT1	synaptotagmin 1	278.463	305.134	346.004	197.798	319.301	172.829	402.988	1558.92	572.69	880.403	1039.57	887.672
ENSG00000067798	89795	NAV3	neuron navigator 3	103.153	86.9378	142.987	149.946	176.535	54.332	94.0781	177.239	90.647	69.6585	98.286	80.5602
ENSG00000067829	3421	IDH3G	isocitrate dehydrogenase (NAD(+)) 3 gamma	70.9832	90.2127	81.5413	67.058	101.743	78.3494	81.9786	99.6911	110.538	91.6003	86.6725	94.1843
ENSG00000067836	79641	ROGDI	rogdi atypical leucine zipper	49.7782	64.8537	67.5283	53.9668	59.9821	49.3946	109.751	151.949	223.437	170.902	128.448	166.79
ENSG00000067840	57595	PDZD4	PDZ domain containing 4	437.226	453.891	547.224	585.057	467.208	428.15	667.809	921.213	566.8	533.848	574.723	579.45
ENSG00000067842	492	ATP2B3	ATPase plasma membrane Ca2+ transporting 3	15.1867	16.9127	26.1829	13.8663	16.7138	13.5778	33.9667	131.122	33.753	74.4364	77.4953	74.047
ENSG00000067900	6093	ROCK1	Rho associated coiled-coil containing protein kinase 1	47.2005	36.9044	52.2234	64.0953	46.696	24.9588	27.8265	22.8677	13.9179	18.7841	28.0312	20.3399
ENSG00000067955	865	CBFB	core-binding factor subunit beta	41.6406	48.2973	42.3336	41.3579	41.1622	40.5241	22.3481	22.4863	23.641	30.7036	21.9866	20.2277
ENSG00000067992	5165	PDK3	pyruvate dehydrogenase kinase 3	4.80268	2.58141	2.61089	1.7053	1.95291	5.41856	2.51832	14.5903	4.6393	7.27712	7.61196	6.22964
ENSG00000068001	8692	HYAL2	hyaluronidase 2	31.8215	38.4148	26.0464	20.033	28.9983	72.1986	29.9561	15.5821	21.4186	14.7535	11.8656	14.1437
ENSG00000068024	9759	HDAC4	histone deacetylase 4	44.2103	67.124	65.3117	71.1921	77.0477	37.8044	58.2137	61.3557	28.0858	36.4026	52.1559	44.9092
ENSG00000068028	11186	RASSF1	Ras association domain family member 1	26.3116	24.5567	28.4711	21.7211	24.1271	50.9846	24.7033	17.146	22.8631	11.4798	14.7171	19.742
ENSG00000068078	2261	FGFR3	fibroblast growth factor receptor 3	256.157	155.675	138.005	86.557	127.279	374.675	381.036	137.607	161.931	146.59	250.705	267.884
ENSG00000068079	3430	IFI35	interferon induced protein 35	0.957205	1.19269	0.820186	2.29096	2.53081	28.1807	9.06836	6.65624	15.807	11.6945	5.90367	8.93078
ENSG00000068097	63897	HEATR6	HEAT repeat containing 6	40.8482	30.6174	34.0002	32.7797	35.6425	18.7662	14.6575	16.5357	8.02849	14.1262	16.475	17.3422
ENSG00000068120	80347	COASY	Coenzyme A synthase	51.2628	42.8181	42.4259	35.1568	36.792	77.1778	53.9666	56.2443	66.367	48.3044	50.2612	56.8736
ENSG00000068137	79990	PLEKHH3	pleckstrin homology, MyTH4 and FERM domain containing H3	6.8717	9.25691	8.7969	20.0675	14.3568	42.7417	16.0066	8.79235	8.69522	6.82958	6.40159	8.13328
ENSG00000068305	4205	MEF2A	myocyte enhancer factor 2A	51.0389	49.3091	53.7679	46.0432	57.2072	62.7841	64.2823	120.9	28.4192	70.5784	80.6695	65.0036
ENSG00000068308	55593	OTUD5	OTU deubiquitinase 5	78.1386	79.2331	83.7118	84.9034	84.3311	81.0273	114.783	129.673	115.205	143.025	118.809	127.094
ENSG00000068323	7030	TFE3	transcription factor binding to IGHM enhancer 3	40.7881	41.0649	41.6832	37.2583	50.8219	104.835	91.3892	104.535	66.367	117.505	101.874	99.8217
ENSG00000068354	4943	TBC1D25	TBC1 domain family member 25	32.6213	35.5874	35.3163	32.0562	38.4582	30.0636	35.187	52.5824	41.4759	44.2712	39.8923	41.6497
ENSG00000068366	2182	ACSL4	acyl-CoA synthetase long chain family member 4	91.7334	102.544	93.4576	58.4109	73.3069	35.9215	66.1497	175.446	84.3131	131.135	103.205	81.9259
ENSG00000068383	3632	INPP5A	inositol polyphosphate-5-phosphatase A	35.8177	33.3577	31.2706	23.3403	28.6345	44.7502	46.9848	48.6917	41.976	36.6832	55.7724	53.978
ENSG00000068394	27238	GPKOW	G-patch domain and KOW motifs	37.0119	31.0355	33.1896	29.9548	34.0581	27.0091	28.5162	33.8534	37.3089	29.4315	33.2518	34.5476
ENSG00000068400	56850	GRIPAP1	GRIP1 associated protein 1	69.6855	65.9433	97.2296	104.678	89.2561	57.8886	103.992	144.32	69.9229	90.641	139.054	121.915
ENSG00000068438	24140	FTSJ1	FtsJ RNA 2'-O-methyltransferase 1	40.073	38.7487	34.3481	34.1922	38.8833	28.4317	21.2963	25.309	21.9742	20.1877	19.6422	21.1172
ENSG00000068489	55771	PRR11	proline rich 11	8.77799	3.70167	7.81076	7.7686	3.86786	2.02934	0.986629	1.583	0.694506	0.786716	0.743674	0.691599
ENSG00000068615	65055	REEP1	receptor accessory protein 1	290.282	350.893	313.658	215.058	253.698	73.2446	99.8596	148.059	132.373	124.49	131.343	103.247
ENSG00000068650	23250	ATP11A	ATPase phospholipid transporting 11A	27.3884	22.6382	30.2273	20.1708	31.7245	39.1852	39.6085	45.4875	9.02858	36.9386	50.1552	52.3905
ENSG00000068654	25885	POLR1A	RNA polymerase I subunit A	59.1285	55.2009	85.7528	64.6465	67.5741	26.8417	40.8765	51.0566	18.1961	26.4643	41.9329	37.0644
ENSG00000068697	9741	LAPTM4A	lysosomal protein transmembrane 4 alpha	144.72	158.619	119.043	105.298	122.54	225.634	130.205	88.4003	144.485	141.877	119.445	103.442
ENSG00000068724	57217	TTC7A	tetratricopeptide repeat domain 7A	8.57936	10.4038	10.3166	15.0721	12.3783	21.193	19.8533	17.2986	14.2513	11.3198	16.6915	21.7313
ENSG00000068745	51447	IP6K2	inositol hexakisphosphate kinase 2	172.565	175.782	161.264	190.667	146.882	78.0983	67.4109	63.2629	81.5906	62.2743	65.8148	68.632
ENSG00000068784	55133	SRBD1	S1 RNA binding domain 1	23.3574	16.692	17.2979	13.0051	14.8385	7.13408	7.13124	6.88511	3.25029	6.83615	6.65252	4.95498
ENSG00000068793	---	---	---	131.708	117.505	130.817	125.176	158.204	165.507	96.8805	81.0765	47.1431	58.7743	58.1745	63.0602
ENSG00000068796	3796	KIF2A	kinesin family member 2A	159.853	122.369	161.244	163.175	163.488	36.5073	60.8394	113.614	35.142	79.2773	74.9241	68.0514
ENSG00000068831	10235	RASGRP2	RAS guanyl releasing protein 2	8.65369	13.3859	16.6792	24.1326	26.9854	47.3025	43.9058	26.6822	30.9194	16.6019	19.3483	22.7848
ENSG00000068878	23198	PSME4	proteasome activator subunit 4	80.1476	62.4008	69.2865	55.0692	53.2882	28.9757	34.6883	50.4463	26.0301	35.4729	40.162	38.0722
ENSG00000068885	57560	IFT80	intraflagellar transport 80	7.76138	7.27943	6.30106	11.007	9.43449	5.75329	8.18633	12.2635	20.2518	11.7324	13.6255	11.7254
ENSG00000068903	22933	SIRT2	sirtuin 2	76.2123	94.737	79.2023	76.5319	118.957	418.024	367.885	285.837	441.9	411.348	215.867	260.106
ENSG00000068912	27248	ERLEC1	endoplasmic reticulum lectin 1	43.3516	47.1403	41.3405	43.4249	43.3178	42.1141	43.6793	74.6682	109.315	81.14	71.5096	76.6595
ENSG00000068971	5526	PPP2R5B	protein phosphatase 2 regulatory subunit B'beta	63.6195	75.8285	77.1379	57.2052	74.417	119.731	122.829	146.571	142.763	119.71	120.162	134.735
ENSG00000068976	5837	PYGM	glycogen phosphorylase, muscle associated	0	0	0	0.878489	2.18846	23.6617	109.471	45.3731	57.5329	61.2897	60.8333	49.4721
ENSG00000069018	57113	TRPC7	transient receptor potential cation channel subfamily C member 7	0.52064	0.783385	1.27848	1.25745	1.30154	0	0.421322	0.934544	0	0	0	0.44258
ENSG00000069020	375449	MAST4	microtubule associated serine/threonine kinase family member 4	17.8199	19.3774	23.1115	16.0023	36.9609	49.1854	53.1875	48.0051	19.6962	32.6339	35.0695	36.8617
ENSG00000069122	221395	ADGRF5	adhesion G protein-coupled receptor F5	20.3154	10.0008	10.2677	5.32261	19.2768	90.3581	54.7116	38.2782	15.0847	21.4531	27.2857	34.5936
ENSG00000069188	54549	SDK2	sidekick cell adhesion molecule 2	11.9452	17.8759	29.0735	46.0087	45.1256	28.6828	54.8505	65.1702	17.7516	27.0397	30.5126	26.0686
ENSG00000069248	55746	NUP133	nucleoporin 133	100.303	72.3447	77.5189	70.6064	79.4826	38.5994	33.8191	48.9205	27.9747	34.174	41.0209	42.2666
ENSG00000069275	64710	NUCKS1	nuclear casein kinase and cyclin dependent kinase substrate 1	500.88	322.294	330.947	241.929	261.122	137.096	197.862	306.283	130.984	304.803	306.14	245.745
ENSG00000069329	55737	VPS35	VPS35 retromer complex component	197.227	172.189	172.703	163.795	190.72	110.735	101.851	174.607	138.651	153.489	145.834	145.544
ENSG00000069345	10294	DNAJA2	DnaJ heat shock protein family (Hsp40) member A2	104.187	94.7867	104.816	80.3904	93.1747	65.5038	91.3964	121.968	145.819	124.804	114.723	110.165
ENSG00000069399	602	BCL3	BCL3 transcription coactivator	0.526605	0.409677	0.451968	0.568434	0.949735	17.8457	6.4479	1.69744	3.63921	5.82765	4.90754	3.92097
ENSG00000069424	8514	KCNAB2	potassium voltage-gated channel subfamily A regulatory beta subunit 2	22.0713	27.3735	25.9343	24.3393	32.4874	53.9973	163.061	438.416	228.77	376.053	379.377	435.746
ENSG00000069431	10060	ABCC9	ATP binding cassette subfamily C member 9	19.3446	14.7308	11.3464	8.52651	21.5319	72.0731	29.4423	19.9687	3.75033	12.1756	15.2356	11.2029
ENSG00000069482	51083	GAL	galanin and GMAP prepropeptide	0	0	0	0	0	0.857764	1.15425	1.27785	3.47253	1.24099	1.15899	0.815843
ENSG00000069493	29121	CLEC2D	C-type lectin domain family 2 member D	0.606535	0.511979	0.877168	2.32541	0.796091	2.32224	0.68092	0	0	0	0	0
ENSG00000069509	139341	FUNDC1	FUN14 domain containing 1	16.7226	17.8935	14.5187	12.6606	13.2446	15.0841	16.907	19.1296	39.1424	25.0387	24.3295	25.9206
ENSG00000069535	4129	MAOB	monoamine oxidase B	11.4292	14.7197	12.3656	7.07959	18.0734	58.0978	40.5044	63.4537	33.9752	88.8322	68.3569	83.7692
ENSG00000069667	6095	RORA	RAR related orphan receptor A	7.24156	11.1169	6.75613	9.18107	15.0999	39.1433	33.7368	22.4863	9.86199	22.3544	26.843	19.377
ENSG00000069696	1815	DRD4	dopamine receptor D4	0.462335	0.636898	1.22077	1.01629	1.05018	6.59013	3.22893	1.96445	1.19455	0.780336	1.019	1.80952
ENSG00000069702	7049	TGFBR3	transforming growth factor beta receptor 3	1.75998	0.677882	0.723517	0.671786	2.78783	16.0883	18.9409	14.514	5.58383	13.3066	15.9067	14.3209
ENSG00000069712	---	---	---	33.2124	22.6018	27.5271	32.3663	21.117	23.6617	46.3631	93.3209	60.811	58.9559	74.6878	62.8333
ENSG00000069849	483	ATP1B3	ATPase Na+/K+ transporting subunit beta 3	111.026	129.98	101.287	78.4611	77.4787	44.6665	73.0322	66.3527	95.0362	62.4232	65.1262	67.1853
ENSG00000069869	4734	NEDD4	NEDD4 E3 ubiquitin protein ligase	8.0052	7.62258	5.9528	5.97717	5.90881	5.87882	4.11012	3.07065	1.25011	3.27186	3.71835	2.91585
ENSG00000069943	9488	PIGB	phosphatidylinositol glycan anchor biosynthesis class B	1.85143	2.70208	2.75262	2.35986	3.63452	3.74487	3.88012	3.3758	3.41697	5.07419	4.2413	4.24646
ENSG00000069956	5597	MAPK6	mitogen-activated protein kinase 6	207.187	141.94	149.034	126.141	119.497	38.6412	49.8954	81.725	54.4215	73.7942	67.1413	61.3203
ENSG00000069966	10681	GNB5	G protein subunit beta 5	42.8112	48.806	45.318	34.8812	47.8654	39.1433	44.2191	82.7549	70.3118	50.7027	61.1402	58.0821
ENSG00000069974	5873	RAB27A	RAB27A, member RAS oncogene family	2.30556	2.45896	2.11689	3.29003	3.02361	5.1675	3.30237	1.81187	2.2502	1.87786	2.29317	2.71224
ENSG00000069998	27440	HDHD5	haloacid dehalogenase like hydrolase domain containing 5	72.3561	71.8187	58.8375	38.3951	45.3101	84.6675	34.8267	30.9544	52.5325	21.4787	25.4932	26.9949
ENSG00000070010	7353	UFD1	ubiquitin recognition factor in ER associated degradation 1	38.3808	34.6335	31.5578	29.2657	27.6446	30.0636	23.6576	19.1677	46.2541	27.6942	21.9941	24.9942
ENSG00000070018	4040	LRP6	LDL receptor related protein 6	95.8059	65.752	85.5754	79.3224	65.0014	27.0928	38.3958	37.2864	11.8622	26.9731	42.2532	30.507
ENSG00000070019	2984	GUCY2C	guanylate cyclase 2C	0	0	0	0	0	0	0	0	0.416704	0	0	0
ENSG00000070047	57661	PHRF1	PHD and ring finger domains 1	62.3666	61.4374	85.1746	93.6194	72.1999	48.2231	58.0012	58.7237	18.2516	32.6171	40.8896	40.168
ENSG00000070061	8518	ELP1	elongator complex protein 1	79.401	74.5873	84.638	94.1362	86.023	30.7749	40.5121	61.3557	29.0859	46.9612	57.1063	58.9012
ENSG00000070081	4925	NUCB2	nucleobindin 2	39.4678	32.6641	33.3047	34.9501	35.6415	23.6617	23.7212	22.8296	24.9744	24.067	26.6016	21.6403
ENSG00000070087	5217	PFN2	profilin 2	764.559	848.883	642.175	1142.47	906.134	374.592	394.049	567.764	713.091	735.464	557.246	516.013
ENSG00000070159	5774	PTPN3	protein tyrosine phosphatase non-receptor type 3	3.52583	2.6833	3.10859	1.46415	3.24217	7.30145	22.4464	40.605	13.6957	29.1403	30.4679	22.402
ENSG00000070182	6710	SPTB	spectrin beta, erythrocytic	28.318	33.5797	48.5202	52.3132	36.8999	37.9717	89.1923	165.414	26.1968	71.4137	111.072	82.6907
ENSG00000070190	27071	DAPP1	dual adaptor of phosphotyrosine and 3-phosphoinositides 1	0	0	0	0	0	0.606711	0	0	0	0.439697	0	0
ENSG00000070193	2255	FGF10	fibroblast growth factor 10	0	0.833927	1.85061	0	0	0	0	1.08712	0.805627	0.823797	0.550655	0.812653
ENSG00000070214	23446	SLC44A1	solute carrier family 44 member 1	80.491	72.4318	84.1544	71.9155	82.2713	118.141	116.762	207.793	215.658	313.237	316.567	308.013
ENSG00000070269	54916	TMEM260	transmembrane protein 260	7.58135	10.0257	9.74638	16.0367	12.3333	10.3978	7.8482	9.89854	8.08405	8.24459	10.9837	12.1474
ENSG00000070366	23293	SMG6	SMG6 nonsense mediated mRNA decay factor	86.5626	69.563	94.2734	76.3941	86.1878	92.2828	75.0817	64.4073	29.8638	59.926	69.7919	69.6557
ENSG00000070367	10640	EXOC5	exocyst complex component 5	153.328	130.581	124.841	109.26	114.051	53.2441	56.0105	73.7146	45.0873	80.1921	67.4986	57.7107
ENSG00000070371	8218	CLTCL1	clathrin heavy chain like 1	10.7406	8.66226	14.6835	11.7649	13.945	11.9459	13.6746	7.57172	7.08396	8.599	8.91543	11.5167
ENSG00000070388	27006	FGF22	fibroblast growth factor 22	0	0	0	0.878489	0	0.815921	1.63072	1.69744	1.02787	0	0.942473	1.32574
ENSG00000070404	10272	FSTL3	follistatin like 3	2.43756	3.51007	4.43268	5.32261	5.77594	29.9799	12.4612	6.2748	12.14	6.84861	8.39661	11.1897
ENSG00000070413	9993	DGCR2	DiGeorge syndrome critical region gene 2	203.58	222.745	197.987	163.244	203.749	223.667	281.324	228.467	108.426	181.536	247.814	212.303
ENSG00000070423	55658	RNF126	ring finger protein 126	31.675	39.6175	34.4209	34.5022	32.1402	54.9596	47.4614	42.2834	52.1991	32.3771	32.6803	40.2809
ENSG00000070444	4335	MNT	MAX network transcriptional repressor	30.5821	40.4859	46.2336	42.5981	44.1102	31.9046	38.4332	44.6102	29.0304	37.5825	40.02	38.4469
ENSG00000070476	79364	ZXDC	ZXD family zinc finger C	40.0496	32.8323	39.4795	44.6996	43.0952	22.4901	19.9274	17.2223	6.195	11.3891	15.3147	18.1091
ENSG00000070495	23210	JMJD6	jumonji domain containing 6, arginine demethylase and lysine hydroxylase	58.5438	52.1712	68.8501	60.6502	53.7849	29.3941	26.1621	24.6224	14.5846	18.3783	29.2185	23.7164
ENSG00000070501	5423	POLB	DNA polymerase beta	53.7437	58.6853	51.3793	57.4463	45.7412	21.4022	19.4424	20.4646	67.3115	19.6909	25.465	21.2026
ENSG00000070526	55808	ST6GALNAC1	ST6 N-acetylgalactosaminide alpha-2,6-sialyltransferase 1	0.586623	0.857608	0.627883	0.602885	1.59284	19.352	4.21597	1.96445	3.41697	1.68405	1.98206	2.55622
ENSG00000070540	55062	WIPI1	WD repeat domain, phosphoinositide interacting 1	4.00671	2.66238	2.24804	4.01349	5.23583	22.4901	8.35031	4.25313	6.02831	7.655	7.41069	7.24984
ENSG00000070601	22844	FRMPD1	FERM and PDZ domain containing 1	5.02241	2.65207	3.30614	4.9092	1.74074	2.65697	10.2857	7.60986	3.91702	4.30005	6.20979	6.09642
ENSG00000070610	57704	GBA2	glucosylceramidase beta 2	101.375	87.865	97.4549	108.158	108.172	73.3702	120.233	137.912	81.3684	117.368	112.402	128.391
ENSG00000070614	3340	NDST1	N-deacetylase and N-sulfotransferase 1	131.792	119.09	154.443	100.199	137.579	98.8939	173.71	173.425	47.4209	111.36	145.547	145.949
ENSG00000070669	440	ASNS	asparagine synthetase (glutamine-hydrolyzing)	64.4703	59.992	72.8029	63.4752	65.2373	39.3944	46.1336	95.0756	118.427	78.7783	73.3335	81.2513
ENSG00000070718	10947	AP3M2	adaptor related protein complex 3 subunit mu 2	74.288	72.9312	64.5627	47.6279	53.1004	40.3149	55.9867	101.636	86.2577	91.6087	91.598	96.3159
ENSG00000070729	1258	CNGB1	cyclic nucleotide gated channel beta 1	0.908141	0.687048	0.591468	0.568434	0.540081	0.481184	2.76179	5.13046	0.750067	5.02525	7.26724	7.70329
ENSG00000070731	10610	ST6GALNAC2	ST6 N-acetylgalactosaminide alpha-2,6-sialyltransferase 2	0.88802	0.698293	0.897249	0.809588	1.3639	4.33066	4.77222	3.87168	2.80581	0.787315	1.75737	1.65738
ENSG00000070748	1103	CHAT	choline O-acetyltransferase	0.447941	0	0.635564	0.430632	0	0	0.421878	0	0	0	0	0
ENSG00000070756	26986	PABPC1	poly(A) binding protein cytoplasmic 1	782.437	670.542	891.79	787.557	833.701	483.297	260.384	214.583	182.322	234.177	177.517	178.397
ENSG00000070759	10420	TESK2	testis associated actin remodelling kinase 2	0.728104	0.72743	0.669607	1.98091	1.84527	4.79092	4.57445	8.02945	10.2509	9.87356	10.5172	12.9597
ENSG00000070761	29105	CFAP20	cilia and flagella associated protein 20	86.3967	75.6016	64.7869	53.7256	61.1988	42.7417	47.621	46.6319	58.0329	49.7589	40.7431	45.4952
ENSG00000070770	1459	CSNK2A2	casein kinase 2 alpha 2	133.112	101.784	120.931	104.402	106.156	70.1902	62.2657	73.6764	53.977	62.9748	72.0973	60.471
ENSG00000070778	11099	PTPN21	protein tyrosine phosphatase non-receptor type 21	30.9587	33.8255	37.7783	55.0348	44.9983	23.3688	29.7658	21.1131	8.25073	15.2406	20.8831	18.4352
ENSG00000070785	8891	EIF2B3	eukaryotic translation initiation factor 2B subunit gamma	30.3796	29.0037	32.4207	24.0637	28.7597	18.557	16.9026	23.8976	48.5321	34.0429	25.5818	27.2123
ENSG00000070808	815	CAMK2A	calcium/calmodulin dependent protein kinase II alpha	46.4915	38.9369	34.4336	25.5451	31.2174	185.256	757.622	2093.17	569.578	1735.08	1664.86	1242.08
ENSG00000070814	6949	TCOF1	treacle ribosome biogenesis factor 1	51.625	43.9571	65.656	60.0645	43.431	19.4775	40.1583	49.6071	22.3631	28.1222	43.847	38.2443
ENSG00000070831	998	CDC42	cell division cycle 42	324.742	370.703	292.374	246.959	311.593	186.302	158.141	163.736	303.333	188.18	173.586	144.534
ENSG00000070882	26031	OSBPL3	oxysterol binding protein like 3	4.41819	3.82975	7.51566	4.9092	7.59044	5.62777	16.5386	24.0121	12.1955	15.2539	10.2008	13.3806
ENSG00000070886	2046	EPHA8	EPH receptor A8	3.37874	4.96916	5.16055	4.97811	5.76196	4.91645	3.28016	3.56653	4.19482	2.37934	2.4087	4.18702
ENSG00000070950	56852	RAD18	RAD18 E3 ubiquitin protein ligase	23.9164	20.4968	18.2751	15.1066	12.6638	4.20513	3.71421	5.66448	2.86137	3.9915	4.79298	3.91751
ENSG00000070961	490	ATP2B1	ATPase plasma membrane Ca2+ transporting 1	77.051	90.6465	121.603	118.837	106.166	69.3115	182.414	574.478	274.886	304.729	376.384	298.979
ENSG00000071051	8440	NCK2	NCK adaptor protein 2	90.5336	71.0945	107.993	102.266	83.3834	56.2149	44.2333	44.6483	20.5852	24.5965	25.2221	27.6929
ENSG00000071054	9448	MAP4K4	mitogen-activated protein kinase kinase kinase kinase 4	554.451	363.453	661.965	568.934	568.551	183.75	274.487	409.884	187.6	445.032	387.146	379.362
ENSG00000071073	11320	MGAT4A	alpha-1,3-mannosyl-glycoprotein 4-beta-N-acetylglucosaminyltransferase A	24.1019	20.7724	19.6501	17.7593	16.4531	22.3646	22.102	36.905	22.3075	33.5778	36.8319	31.6553
ENSG00000071082	6160	RPL31	ribosomal protein L31	773.457	796.913	600.303	643.657	537.935	1468.55	440.298	296.365	1947.65	461.028	316.155	467.117
ENSG00000071127	9948	WDR1	WD repeat domain 1	186.695	193.5	186.815	147.845	193.028	244.881	248.352	249.676	161.375	189.042	183.901	164.497
ENSG00000071189	23161	SNX13	sorting nexin 13	38.4032	38.641	42.5832	40.6689	41.7405	40.1057	43.7699	67.764	37.6422	45.7012	47.3898	42.5203
ENSG00000071205	79658	ARHGAP10	Rho GTPase activating protein 10	2.71123	2.76043	2.54906	2.18761	2.2423	7.67803	9.30153	10.3181	4.86154	7.03475	8.07525	6.20491
ENSG00000071242	6196	RPS6KA2	ribosomal protein S6 kinase A2	109.108	104.616	104.704	112.085	110.385	132.577	125.481	121.586	65.4225	162.675	165.395	186.155
ENSG00000071243	54556	ING3	inhibitor of growth family member 3	17.7209	21.1925	18.9872	24.6494	19.801	9.39356	10.8615	9.78411	11.0288	9.3918	10.4384	9.07718
ENSG00000071246	22846	VASH1	vasohibin 1	123.58	111.895	153.512	204.929	143.507	62.7423	83.431	59.2196	27.2524	30.2452	37.7622	39.3857
ENSG00000071282	29995	LMCD1	LIM and cysteine rich domains 1	3.69196	3.41755	2.90781	2.91107	4.12987	21.9044	9.84971	9.74596	15.5292	5.35686	6.46835	7.586
ENSG00000071462	114049	BUD23	BUD23 rRNA methyltransferase and ribosome maturation factor	24.3022	34.4945	30.0691	32.1596	28.2593	33.4109	33.2861	33.4338	49.6989	43.3328	32.8954	35.9309
ENSG00000071537	6400	SEL1L	SEL1L adaptor subunit of ERAD E3 ubiquitin ligase	95.0193	103.02	102.033	63.6474	97.6285	65.0017	77.3787	135.433	69.4784	117.607	134.354	110.576
ENSG00000071539	9319	TRIP13	thyroid hormone receptor interactor 13	25.2067	19.2428	18.9804	15.9334	11.1638	4.3725	4.25038	4.1387	4.80598	3.08146	4.05674	3.70581
ENSG00000071553	537	ATP6AP1	ATPase H+ transporting accessory protein 1	148.876	169.878	158.566	118.665	214.259	242.873	244.931	344.923	290.665	333.776	317.884	322.804
ENSG00000071564	6929	TCF3	transcription factor 3	223.651	175.833	194.51	207.237	129.202	109.982	60.2166	23.4399	18.1405	17.0681	20.6775	22.8197
ENSG00000071575	28951	TRIB2	tribbles pseudokinase 2	371.275	330.599	237.094	77.9444	121.333	287.267	165.254	117.772	65.2002	85.6325	72.0075	55.4494
ENSG00000071626	26528	DAZAP1	DAZ associated protein 1	92.506	82.1812	89.9358	109.57	73.3328	59.8552	57.5396	34.4637	42.6982	41.0491	42.7856	45.9691
ENSG00000071655	53615	MBD3	methyl-CpG binding domain protein 3	76.8136	109.808	79.3678	83.5943	77.4747	103.371	119.85	79.2455	87.4244	59.6202	69.5357	77.9225
ENSG00000071794	6596	HLTF	helicase like transcription factor	51.947	63.5572	60.5862	77.8755	62.9149	26.0467	32.0674	50.6752	21.0296	33.3168	39.9775	35.7643
ENSG00000071859	9130	FAM50A	family with sequence similarity 50 member A	53.8013	52.5394	64.8887	67.3681	59.1059	52.4073	65.5663	57.2742	93.425	56.5088	57.8526	62.7701
ENSG00000071889	60343	FAM3A	family with sequence similarity 3 member A	26.5397	32.937	29.4213	29.059	32.5471	75.6296	61.3189	57.3887	104.259	67.4683	49.3906	62.9173
ENSG00000071894	29894	CPSF1	cleavage and polyadenylation specific factor 1	146.468	100.481	130.364	107.537	95.5344	76.6757	61.7469	49.5309	29.8638	43.0033	44.4692	54.1992
ENSG00000071909	140469	MYO3B	myosin IIIB	0.856297	0.446458	0	0	0.621077	0.439342	0.487963	0.667532	0	0.520281	0	0.690404
ENSG00000071967	79901	CYBRD1	cytochrome b reductase 1	14.3639	15.2297	13.0327	17.1392	16.34	84.5002	43.0873	34.4637	44.2539	72.3767	76.1297	64.0321
ENSG00000071991	28513	CDH19	cadherin 19	0	0	0	0	0	0	0	2.99436	2.30576	6.17046	8.79567	7.20331
ENSG00000071994	5134	PDCD2	programmed cell death 2	36.93	39.7346	29.3858	27.8188	26.4774	22.1136	21.9425	23.5925	39.3091	20.3917	20.6724	23.2759
ENSG00000072041	55117	SLC6A15	solute carrier family 6 member 15	29.0249	40.691	46.0347	28.4045	34.6505	12.4899	19.9563	65.9331	24.3633	51.7324	50.0199	44.5485
ENSG00000072042	51109	RDH11	retinol dehydrogenase 11	72.317	73.2433	79.2179	68.1604	96.4274	85.7973	78.7438	84.4714	139.929	79.5089	78.148	82.1528
ENSG00000072062	5566	PRKACA	protein kinase cAMP-activated catalytic subunit alpha	80.4576	88.7573	83.8959	73.707	99.5943	121.823	137.344	149.012	102.926	170.318	164.076	140.16
ENSG00000072071	22859	ADGRL1	adhesion G protein-coupled receptor L1	197.655	222.974	297.998	191.666	212.599	196.512	309.826	421.747	149.763	196.224	264.495	199.662
ENSG00000072110	87	ACTN1	actinin alpha 1	42.8847	35.4903	43.1097	31.5395	60.8862	163.163	86.5765	138.561	58.533	84.126	109.81	132.125
ENSG00000072121	23503	ZFYVE26	zinc finger FYVE-type containing 26	31.9045	32.4952	40.465	44.2173	39.4866	25.963	27.1099	28.1317	9.25082	18.9775	26.7834	23.555
ENSG00000072133	27330	RPS6KA6	ribosomal protein S6 kinase A6	11.4258	7.47356	8.88465	4.59915	6.9665	1.9875	3.33391	9.36452	1.02787	3.51443	5.97886	3.81843
ENSG00000072134	22905	EPN2	epsin 2	59.6636	68.4147	62.9608	60.1679	76.8896	167.724	174.632	149.508	77.5347	126.258	125.748	106.389
ENSG00000072135	26469	PTPN18	protein tyrosine phosphatase non-receptor type 18	15.3309	17.7484	21.8564	25.3728	25.8842	33.7875	28.9153	21.2657	15.2514	22.5118	18.7474	24.5504
ENSG00000072163	55679	LIMS2	LIM zinc finger domain containing 2	6.10495	9.59738	8.10455	10.8003	22.7951	180.904	225.146	90.6127	59.3108	56.93	47.5774	40.686
ENSG00000072182	55515	ASIC4	acid sensing ion channel subunit family member 4	1.42186	2.02444	1.64927	3.39338	4.70468	48.0557	33.7323	13.0264	10.5843	10.9857	8.21216	10.3975
ENSG00000072195	10290	SPEG	striated muscle enriched protein kinase	14.971	21.7779	35.7698	70.3653	41.3402	68.4746	85.9635	102.59	45.9208	51.6941	59.4321	67.2513
ENSG00000072201	84708	LNX1	ligand of numb-protein X 1	12.6776	20.2781	25.4125	21.2043	25.056	9.81198	23.5156	59.4866	15.4736	35.9399	33.7589	33.1458
ENSG00000072210	224	ALDH3A2	aldehyde dehydrogenase 3 family member A2	78.5416	82.7912	73.5796	83.8354	95.0948	72.1149	47.9905	56.168	46.2541	56.1811	60.7067	56.394
ENSG00000072274	7037	TFRC	transferrin receptor	92.41	79.9933	89.393	57.1018	70.8964	150.276	109.948	139.133	116.983	88.4357	102.561	74.7213
ENSG00000072310	6720	SREBF1	sterol regulatory element binding transcription factor 1	40.5961	43.052	54.117	61.5459	46.6318	146.134	132.556	73.0661	74.201	128.046	134.219	170.82
ENSG00000072315	7224	TRPC5	transient receptor potential cation channel subfamily C member 5	1.37952	1.206	3.11635	1.39525	2.26546	1.15066	2.00367	14.1707	0.916748	5.14538	5.15364	3.45003
ENSG00000072364	27125	AFF4	AF4/FMR2 family member 4	232.886	214.355	229.018	167.929	226.151	72.6589	98.8542	137.607	45.8096	91.3965	115.565	96.3041
ENSG00000072401	7321	UBE2D1	ubiquitin conjugating enzyme E2 D1	25.1989	47.5147	34.1994	33.1242	38.988	13.6196	14.8566	19.3584	24.4188	25.6719	16.9352	16.0754
ENSG00000072415	64398	MPP5	membrane palmitoylated protein 5	67.2548	63.4486	51.9133	43.2871	52.3991	43.3694	41.9978	59.2959	52.4213	62.9265	60.2405	60.1607
ENSG00000072422	9886	RHOBTB1	Rho related BTB domain containing 1	27.8402	30.7352	28.1627	43.0115	44.5811	14.6238	13.1088	18.4429	10.0842	8.41201	11.6023	11.2056
ENSG00000072501	8243	SMC1A	structural maintenance of chromosomes 1A	225.241	134.352	175.629	121.387	101.376	38.3902	63.479	61.2031	12.3622	44.2815	54.6913	44.0509
ENSG00000072506	3028	HSD17B10	hydroxysteroid 17-beta dehydrogenase 10	67.9461	69.0992	54.3603	41.599	53.7119	37.9299	40.2432	31.0307	66.367	44.4418	29.6967	34.9914
ENSG00000072518	2011	MARK2	microtubule affinity regulating kinase 2	55.7103	64.143	70.1446	66.0589	63.22	57.5538	78.3627	91.3756	46.5875	65.3911	78.7758	69.0321
ENSG00000072571	3161	HMMR	hyaluronan mediated motility receptor	14.9252	7.30721	5.39327	6.08052	1.81178	2.61513	0.50505	0.591242	0	0.473583	0.445977	0
ENSG00000072609	55743	CHFR	checkpoint with forkhead and ring finger domains	33.6365	31.8971	38.9583	35.9492	32.6939	30.6494	30.7055	23.7069	15.8625	12.856	18.8944	19.5627
ENSG00000072657	29953	TRHDE	thyrotropin releasing hormone degrading enzyme	4.19202	2.83017	3.02292	3.08333	3.9879	4.95829	9.20969	49.4164	21.9742	28.3937	25.3758	17.3098
ENSG00000072682	8974	P4HA2	prolyl 4-hydroxylase subunit alpha 2	3.15419	2.92601	3.77167	4.8403	7.3391	20.0633	13.9292	22.1048	9.58419	13.0045	17.3099	14.441
ENSG00000072694	2213	FCGR2B	Fc fragment of IgG receptor IIb	0	0	0	0	0	0	0	0.743821	1.58347	0.572378	0	0.663792
ENSG00000072736	4775	NFATC3	nuclear factor of activated T cells 3	26.7423	17.8913	22.8072	20.1364	16.6022	12.8665	8.26061	7.49543	2.69468	7.27696	11.5198	7.9985
ENSG00000072756	51095	TRNT1	tRNA nucleotidyl transferase 1	16.0988	16.1592	17.1424	16.0023	14.1114	8.6404	13.4764	18.8244	21.0296	17.0749	17.7783	15.5061
ENSG00000072778	37	ACADVL	acyl-CoA dehydrogenase very long chain	40.6748	46.9838	54.0347	99.0281	82.8009	247.35	146.12	95.4189	169.154	121.166	131.002	176.425
ENSG00000072786	6793	STK10	serine/threonine kinase 10	10.2504	8.65789	12.4555	15.2444	15.3566	27.6367	19.669	12.8738	7.36177	6.72872	8.73342	9.00034
ENSG00000072803	23291	FBXW11	F-box and WD repeat domain containing 11	159.799	133.664	140.737	107.744	133.965	112.493	110.785	165.262	77.2569	177.04	175.345	157.672
ENSG00000072818	9744	ACAP1	ArfGAP with coiled-coil, ankyrin repeat and PH domains 1	3.17294	3.39282	3.85158	3.35893	3.29326	14.3309	5.46405	2.53662	9.69531	6.07464	3.87409	5.97241
ENSG00000072832	1400	CRMP1	collapsin response mediator protein 1	1904.39	1798.26	1802.58	1626.98	2019.72	419.572	416.013	499.752	274.552	369.832	302.486	249.833
ENSG00000072840	2121	EVC	EvC ciliary complex subunit 1	7.14069	6.29658	10.288	9.38778	9.79625	14.5401	10.3102	5.85521	0.638946	1.73325	5.43148	4.57029
ENSG00000072849	51009	DERL2	derlin 2	33.7309	38.8455	27.2745	30.8505	32.7537	25.0007	18.9244	16.8409	24.9744	24.263	20.5125	18.6025
ENSG00000072858	54847	SIDT1	SID1 transmembrane family member 1	2.45807	2.27169	1.92045	0.637335	3.64779	5.37671	16.3464	35.4173	9.97311	26.9699	31.7093	22.0137
ENSG00000072864	54820	NDE1	nudE neurodevelopment protein 1	25.4557	13.1712	17.7773	15.2444	9.06029	14.5401	6.2146	7.41914	4.6393	8.98266	11.3471	11.1271
ENSG00000072952	10335	MRVI1	murine retrovirus integration site 1 homolog	3.23101	2.34669	2.04669	1.87756	2.37797	72.1986	52.299	41.5968	40.6425	70.6254	76.985	73.9871
ENSG00000072954	79041	TMEM38A	transmembrane protein 38A	3.9785	5.24989	4.51279	3.91014	7.2729	14.5401	31.6887	50.7896	56.6995	36.743	41.6318	36.4024
ENSG00000072958	8907	AP1M1	adaptor related protein complex 1 subunit mu 1	142.473	132.166	122.569	96.341	121.131	96.467	101.292	117.199	69.9784	87.01	89.929	100.944
ENSG00000073008	5817	PVR	PVR cell adhesion molecule	18.6944	14.0446	19.6023	12.7639	14.8839	20.6909	19.6011	25.4997	10.6954	16.4234	22.137	20.0122
ENSG00000073009	---	---	---	2.79681	2.91261	3.07783	3.77234	3.2035	3.49382	3.48655	5.43562	3.47253	3.55662	4.17499	4.1126
ENSG00000073050	7515	XRCC1	X-ray repair cross complementing 1	55.82	35.9153	46.5017	41.3923	35.136	32.9925	24.227	19.5873	20.474	20.0152	20.2466	21.2205
ENSG00000073060	949	SCARB1	scavenger receptor class B member 1	25.8363	31.1435	31.8839	32.1251	44.5855	250.362	96.607	84.2044	55.9216	52.0997	59.0097	73.3193
ENSG00000073111	4171	MCM2	minichromosome maintenance complex component 2	263.176	144.342	147.526	90.6911	59.7964	20.6909	16.6417	12.3398	8.30629	9.95282	9.50803	10.6644
ENSG00000073146	54456	MOV10L1	Mov10 like RISC complex RNA helicase 1	0	0.552959	0.88973	0.91294	1.21498	4.24698	2.47927	2.19332	5.19491	1.38954	2.72318	3.03409
ENSG00000073150	56666	PANX2	pannexin 2	6.44266	8.03988	12.3937	15.6922	19.4339	52.3654	69.0977	64.4454	58.0885	49.9093	37.9671	49.1345
ENSG00000073169	83642	SELENOO	selenoprotein O	9.3328	13.0602	16.977	34.1577	17.6807	29.8544	26.848	15.9254	27.6969	11.4972	14.8686	21.2907
ENSG00000073282	8626	TP63	tumor protein p63	0	0	0	0	0	0.481184	0.836476	0.400519	0	0	0	0
ENSG00000073331	80216	ALPK1	alpha kinase 1	3.63626	3.7495	7.10457	4.15129	8.19981	2.82434	2.20739	14.3996	1.47235	3.58123	3.90023	2.83841
ENSG00000073350	3993	LLGL2	LLGL scribble cell polarity complex component 2	1.02227	1.03308	1.36667	1.7053	0.928332	8.18014	4.27932	4.1387	4.58374	4.73655	4.42587	8.2537
ENSG00000073417	5151	PDE8A	phosphodiesterase 8A	5.37537	6.3603	7.11466	13.1084	7.1225	22.9086	17.8853	20.6935	19.474	30.9759	36.5529	46.8845
ENSG00000073464	1183	CLCN4	chloride voltage-gated channel 4	109.513	127.893	137.977	55.6549	86.5586	51.3612	78.4942	220.533	95.1474	177.01	182.383	176.636
ENSG00000073536	54475	NLE1	notchless homolog 1	41.6187	43.7185	40.9688	29.7481	33.9103	25.6283	28.5908	28.742	30.6972	24.9806	20.9365	23.4374
ENSG00000073578	6389	SDHA	succinate dehydrogenase complex flavoprotein subunit A	97.2243	81.2979	99.7893	73.7414	96.0553	117.597	113.676	145.465	106.871	102.984	106.864	137.224
ENSG00000073584	6605	SMARCE1	SWI/SNF related, matrix associated, actin dependent regulator of chromatin, subfamily e, member 1	103.543	110.571	82.1365	87.3494	82.5871	34.9173	33.3491	27.3307	52.3102	36.6231	34.4458	31.5505
ENSG00000073598	54752	FNDC8	fibronectin type III domain containing 8	0	0	0	0	0	0	0	0	0.472264	0	0	0
ENSG00000073605	55876	GSDMB	gasdermin B	0.427166	0.948239	2.36283	11.4893	2.71812	10.1467	5.99864	1.77373	4.25038	2.07901	4.38499	5.18986
ENSG00000073614	5927	KDM5A	lysine demethylase 5A	97.8493	65.3297	77.6479	59.2722	63.9123	35.6704	29.7425	32.3276	12.5845	22.3676	32.8859	24.8225
ENSG00000073670	4185	ADAM11	ADAM metallopeptidase domain 11	4.7169	9.10219	15.9553	16.9669	23.2664	26.1722	82.2627	174.378	80.8127	62.0612	89.1953	81.2777
ENSG00000073711	5523	PPP2R3A	protein phosphatase 2 regulatory subunit B''alpha	75.8494	61.1106	63.4517	45.0441	49.2165	11.0672	10.5242	14.3615	6.80616	17.5599	18.0719	15.3383
ENSG00000073712	10979	FERMT2	fermitin family member 2	77.4304	61.5354	78.0582	89.7265	115.402	214.378	108.761	63.3011	83.2018	94.3321	86.0857	71.9623
ENSG00000073734	8647	ABCB11	ATP binding cassette subfamily B member 11	0	0.402706	0.659248	0.91294	0.755336	0	0	0	0	0	0	0
ENSG00000073737	10170	DHRS9	dehydrogenase/reductase 9	0	0	0	0	1.20884	0.815921	1.08024	1.88816	2.08352	0.551166	0	1.4075
ENSG00000073754	922	CD5L	CD5 molecule like	0	0	0	0	1.31117	0	0	0	0	0	0	0
ENSG00000073756	5743	PTGS2	prostaglandin-endoperoxide synthase 2	0	0	0	0	0.926184	5.41856	4.55561	14.0945	7.63957	6.65892	5.33167	5.36919
ENSG00000073792	10644	IGF2BP2	insulin like growth factor 2 mRNA binding protein 2	102.216	53.6997	72.8474	45.5609	38.1241	23.8709	6.30539	2.84178	1.08343	1.93375	1.47656	0.903531
ENSG00000073803	9175	MAP3K13	mitogen-activated protein kinase kinase kinase 13	34.436	34.145	35.1327	32.7453	37.5749	26.2559	26.8174	33.0142	25.7523	26.0418	29.138	23.904
ENSG00000073849	6480	ST6GAL1	ST6 beta-galactoside alpha-2,6-sialyltransferase 1	63.5397	53.8221	63.7395	64.9221	73.8161	58.851	42.9177	48.2339	33.3085	41.6437	23.903	29.7188
ENSG00000073905	---	---	---	9.7127	7.82682	7.00592	4.66805	7.27926	8.09645	6.8639	15.4295	7.19508	11.4559	9.84383	9.24816
ENSG00000073910	10129	FRY	FRY microtubule binding protein	87.7033	110.545	122.039	85.4891	96.0847	57.1773	87.3899	170.526	46.4208	89.0862	117.043	98.0024
ENSG00000073921	8301	PICALM	phosphatidylinositol binding clathrin assembly protein	196.154	181.477	207.627	156.802	198.285	139.899	124.036	134.441	89.5913	141.829	176.382	159.381
ENSG00000073969	4905	NSF	N-ethylmaleimide sensitive factor, vesicle fusing ATPase	102.414	84.2925	73.2418	37.8784	71.6703	93.287	165.84	554.566	378.061	522.489	508.024	475.245
ENSG00000074047	2736	GLI2	GLI family zinc finger 2	44.0171	27.2542	32.0659	35.6047	15.0593	22.7412	10.8633	3.98612	1.13899	1.96615	4.28559	3.33663
ENSG00000074054	23332	CLASP1	cytoplasmic linker associated protein 1	338.609	321.756	390.505	439.158	438.85	121.907	151.431	166.597	46.4208	120.701	157.917	120.826
ENSG00000074071	65993	MRPS34	mitochondrial ribosomal protein S34	62.736	67.5636	55.8644	50.5562	46.0736	51.3612	46.6764	41.3679	98.7032	53.4579	33.1642	43.1646
ENSG00000074181	4854	NOTCH3	notch receptor 3	172.937	123.999	143.705	71.7433	123.528	381.705	252.617	95.9148	26.0301	46.0747	74.1695	85.5181
ENSG00000074201	1207	CLNS1A	chloride nucleotide-sensitive channel 1A	115.852	106.553	93.2523	97.4779	87.4914	106.551	62.6219	57.0454	104.704	62.6865	64.7644	68.6457
ENSG00000074211	5522	PPP2R2C	protein phosphatase 2 regulatory subunit Bgamma	66.12	77.7033	92.8317	76.463	82.4802	100.149	288.484	500.401	197.545	378.401	404.797	377.627
ENSG00000074219	8463	TEAD2	TEA domain transcription factor 2	75.3381	59.1589	47.9343	62.855	32.5927	28.1388	9.64289	4.02426	5.19491	3.92017	2.90728	3.64456
ENSG00000074266	8726	EED	embryonic ectoderm development	25.6832	26.6042	27.0066	28.749	20.7835	15.0422	13.5023	13.446	27.808	14.4394	15.0995	16.1477
ENSG00000074276	54825	CDHR2	cadherin related family member 2	5.36883	9.02052	11.3032	12.0405	10.424	4.28882	11.4948	10.4326	2.80581	12.7715	12.0933	7.60962
ENSG00000074317	6620	SNCB	synuclein beta	17.0053	34.7114	38.5824	32.9864	33.2137	238.981	352.457	336.417	581.968	415.722	364.795	364.005
ENSG00000074319	7251	TSG101	tumor susceptibility 101	86.8518	99.0985	89.2626	78.4611	93.9865	60.1481	44.6025	46.8607	79.7015	56.2272	49.4469	53.3049
ENSG00000074356	55421	NCBP3	nuclear cap binding subunit 3	39.7298	34.1626	45.1132	50.1772	36.6556	21.8625	22.8231	19.778	11.251	18.5882	23.1013	20.6712
ENSG00000074370	489	ATP2A3	ATPase sarcoplasmic/endoplasmic reticulum Ca2+ transporting 3	3.31336	4.17499	4.88092	4.7025	6.86382	9.64461	22.8787	5.05417	6.86172	4.62479	7.36878	7.35077
ENSG00000074410	771	CA12	carbonic anhydrase 12	49.5344	70.4831	61.1747	26.2686	71.6856	50.5244	19.9741	15.0862	4.30594	14.0511	15.7849	15.6553
ENSG00000074416	11343	MGLL	monoglyceride lipase	21.389	32.5848	58.4207	48.4892	124.674	584.263	451.971	393.062	287.553	335.157	319.104	265.765
ENSG00000074527	59277	NTN4	netrin 4	26.3218	24.7746	30.9788	45.1819	60.4279	38.4738	29.9356	28.5894	13.5845	29.891	19.1898	24.2516
ENSG00000074582	617	BCS1L	BCS1 homolog, ubiquinol-cytochrome c reductase complex chaperone	30.0754	32.1173	28.9179	32.3318	28.3444	24.8751	22.7684	21.4945	44.1984	21.8569	19.6114	25.1007
ENSG00000074590	9891	NUAK1	NUAK family kinase 1	88.6545	59.5594	105.767	49.7638	71.2556	16.7996	49.377	131.122	70.6452	86.5663	101.181	104.278
ENSG00000074603	54878	DPP8	dipeptidyl peptidase 8	16.5933	22.1486	28.2885	28.4734	34.3518	28.8083	54.9685	70.7011	36.3088	67.0045	72.6112	59.1216
ENSG00000074621	9187	SLC24A1	solute carrier family 24 member 1	4.02393	4.39865	4.61041	6.21833	5.34767	9.30987	7.36999	7.68615	4.13926	5.25837	6.997	7.31453
ENSG00000074657	55205	ZNF532	zinc finger protein 532	231.853	171.454	253.525	306.868	266.848	106.384	91.3331	78.4064	25.3078	44.666	80.2943	68.0028
ENSG00000074660	8578	SCARF1	scavenger receptor class F member 1	3.39781	3.7063	3.25397	2.32541	6.18667	28.5573	11.0415	5.70263	3.86145	2.78126	4.70719	5.58538
ENSG00000074695	3998	LMAN1	lectin, mannose binding 1	38.7177	33.5255	33.5534	33.5032	36.7959	44.9175	27.1242	31.374	15.0847	29.4192	34.4356	31.8612
ENSG00000074696	51495	HACD3	3-hydroxyacyl-CoA dehydratase 3	167.605	157.585	129.313	106.848	135.124	114.752	154.648	200.05	210.269	217.917	201.982	187.887
ENSG00000074706	26034	IPCEF1	interaction protein for cytohesin exchange factors 1	6.66983	11.8225	10.7299	7.87195	15.1219	13.787	33.3126	85.2343	34.5309	54.2601	59.1835	44.8023
ENSG00000074755	23140	ZZEF1	zinc finger ZZ-type and EF-hand domain containing 1	62.0605	56.7252	81.1605	67.6092	69.4333	42.1141	54.5805	55.2144	15.3069	30.1424	51.9426	53.5917
ENSG00000074800	2023	ENO1	enolase 1	778.583	571.658	518.126	323.405	440.8	1630.82	683.319	884.479	907.609	970.114	959.67	1062.45
ENSG00000074803	6557	SLC12A1	solute carrier family 12 member 1	0	0	0	0	0	0	0.424791	0.591242	1.36123	1.06667	1.99348	1.5215
ENSG00000074842	56005	MYDGF	myeloid derived growth factor	41.2119	48.1879	45.7582	33.2276	42.4129	60.7338	40.7487	38.9648	106.093	49.7152	40.9101	41.2634
ENSG00000074855	57719	ANO8	anoctamin 8	46.0863	47.6489	81.1603	116.15	80.7596	107.472	87.4073	47.7381	21.0296	24.6678	31.463	37.666
ENSG00000074935	51175	TUBE1	tubulin epsilon 1	8.07647	8.8201	9.15472	16.5535	9.91371	11.6112	8.33409	4.67272	5.97275	6.62885	8.14952	9.9269
ENSG00000074964	55160	ARHGEF10L	Rho guanine nucleotide exchange factor 10 like	44.9623	47.6781	64.4908	77.1865	66.6908	65.462	73.057	56.2062	30.086	28.7455	41.8235	43.9612
ENSG00000075035	9671	WSCD2	WSC domain containing 2	11.5053	20.5187	9.74156	5.18481	10.4611	22.2809	40.3983	113.805	36.4755	44.1934	65.362	58.088
ENSG00000075043	3785	KCNQ2	potassium voltage-gated channel subfamily Q member 2	133.271	144.741	146.603	139.68	145.988	119.02	130.511	223.165	66.9782	93.6369	96.5647	98.7224
ENSG00000075073	6865	TACR2	tachykinin receptor 2	0	2.41699	1.25108	1.22299	2.35143	4.62355	1.74787	2.49848	1.47235	2.24217	2.99181	1.62873
ENSG00000075089	64431	ACTR6	actin related protein 6	44.3948	47.746	33.4465	40.0143	35.3506	32.1138	19.7176	30.6492	64.2557	39.7194	32.9001	31.115
ENSG00000075131	54962	TIPIN	TIMELESS interacting protein	7.44291	5.92669	6.98181	8.31981	7.24409	3.5775	2.84882	2.3459	3.63921	3.3247	2.99213	3.55847
ENSG00000075142	6717	SRI	sorcin	84.6102	91.0673	74.0184	90.2777	97.9249	161.532	118.992	93.9694	189.6	150.933	118.259	128.609
ENSG00000075151	8672	EIF4G3	eukaryotic translation initiation factor 4 gamma 3	104.762	103.267	164.656	120.181	142.168	64.0394	128.232	205.276	60.0887	122.494	140.239	126.887
ENSG00000075188	79023	NUP37	nucleoporin 37	12.0339	6.57361	5.37282	4.7714	4.06567	3.49382	2.28694	2.65105	3.91702	4.13615	2.94931	2.50001
ENSG00000075213	10371	SEMA3A	semaphorin 3A	68.5047	62.1945	73.3953	35.329	41.2982	10.3141	11.2779	22.7533	13.6957	17.4462	14.8193	11.6484
ENSG00000075218	51512	GTSE1	G2 and S-phase expressed 1	45.3681	27.7116	22.6634	21.0665	6.81412	2.19671	1.69482	0.553098	0	0	0	0
ENSG00000075223	10512	SEMA3C	semaphorin 3C	74.594	92.9977	143.82	63.5096	126.538	10.4396	18.5407	25.3853	19.8073	23.8695	27.9812	26.8057
ENSG00000075234	55020	TTC38	tetratricopeptide repeat domain 38	11.5858	12.8633	9.9996	10.249	11.9186	26.0467	13.6522	8.18203	10.6398	11.6095	11.1972	13.1302
ENSG00000075239	38	ACAT1	acetyl-CoA acetyltransferase 1	52.3146	54.0334	61.413	65.0599	65.8505	59.7715	45.3883	48.3102	66.3115	44.3685	51.0055	53.0211
ENSG00000075240	23151	GRAMD4	GRAM domain containing 4	43.2833	58.9555	73.6238	69.5729	81.1796	60.0644	77.2496	71.1589	30.4194	34.8704	60.3447	44.9758
ENSG00000075275	9620	CELSR1	cadherin EGF LAG seven-pass G-type receptor 1	81.6425	86.1388	94.3272	51.3141	63.9024	14.7493	13.3348	16.5357	1.52791	2.24915	2.80947	1.72201
ENSG00000075290	7479	WNT8B	Wnt family member 8B	3.28943	0	0	0	0	0	0	0	0	0	0	0
ENSG00000075292	27332	ZNF638	zinc finger protein 638	115.898	109.96	148.922	192.148	137.548	61.1104	77.9911	98.8138	32.1973	65.9725	102.302	80.4022
ENSG00000075303	55972	SLC25A40	solute carrier family 25 member 40	17.1575	19.3489	17.0351	14.5209	15.2897	13.787	14.81	26.1863	22.3075	22.3219	21.5124	24.0927
ENSG00000075336	29090	TIMM21	translocase of inner mitochondrial membrane 21	27.7282	26.0798	27.4046	27.3021	24.2052	19.7704	24.1579	24.8894	32.4751	29.9309	23.6088	26.274
ENSG00000075340	119	ADD2	adducin 2	346.5	332.415	492.222	447.874	386.027	114.585	209.1	395.694	114.871	174.867	330.191	200
ENSG00000075391	9462	RASAL2	RAS protein activator like 2	110.494	77.7908	89.111	72.6046	65.9327	26.4651	42.6721	70.6249	18.0849	43.6199	46.0438	39.5102
ENSG00000075399	9605	VPS9D1	VPS9 domain containing 1	27.2308	33.6145	30.7955	33.1242	32.3199	39.6036	45.0465	37.4771	54.866	32.5884	33.8047	48.1394
ENSG00000075407	7587	ZNF37A	zinc finger protein 37A	9.14028	10.1314	17.7871	17.5526	17.5525	6.17171	10.8647	16.6501	2.86137	5.48852	14.8961	9.7163
ENSG00000075413	4140	MARK3	microtubule affinity regulating kinase 3	130.973	121.589	135.82	136.304	145.238	93.1197	80.7086	74.63	63.0889	65.1033	69.901	70.0121
ENSG00000075415	5250	SLC25A3	solute carrier family 25 member 3	347.885	285.437	258.025	209.614	230.884	235.257	238.354	261.043	370.339	307.004	252.787	262.09
ENSG00000075420	64778	FNDC3B	fibronectin type III domain containing 3B	24.0169	20.3633	18.6604	12.7295	29.5387	26.0049	16.8743	13.3697	4.02814	11.1745	10.5601	7.66388
ENSG00000075426	2355	FOSL2	FOS like 2, AP-1 transcription factor subunit	16.7525	17.6615	45.4588	5.70157	20.8825	98.5591	79.7786	94.5416	23.1409	41.4623	47.4983	39.4596
ENSG00000075429	27091	CACNG5	calcium voltage-gated channel auxiliary subunit gamma 5	0.764169	0.601687	0.769362	0.706236	0	0	0.859143	0.438664	0	1.05306	1.03651	0
ENSG00000075461	27092	CACNG4	calcium voltage-gated channel auxiliary subunit gamma 4	296.676	316.083	267.037	279.928	230.505	113.078	166.643	73.5238	57.8107	79.5593	72.3859	58.4175
ENSG00000075539	285527	FRYL	FRY like transcription coactivator	66.1438	63.5307	76.2445	79.0468	69.3385	21.7788	38.4668	61.2031	24.1966	52.0374	76.1098	66.9192
ENSG00000075568	23505	TMEM131	transmembrane protein 131	59.0015	69.383	92.0375	83.4565	112.356	48.1812	56.9694	70.6249	26.6968	48.1299	59.0316	50.155
ENSG00000075618	6624	FSCN1	fascin actin-bundling protein 1	732.755	663.612	594.816	501.411	540.566	699.83	373.565	383.03	230.493	256.574	233.876	260.416
ENSG00000075624	60	ACTB	actin beta	4935.39	5091.67	4432.55	3451.86	4639.75	3928.33	2720.62	2112.28	2817.72	2864.12	2389.62	2353
ENSG00000075643	55034	MOCOS	molybdenum cofactor sulfurase	6.85439	4.72095	2.53144	1.91201	2.34545	2.44776	2.02018	1.54486	2.58356	1.39625	1.0426	0.780081
ENSG00000075651	5337	PLD1	phospholipase D1	1.75891	1.57261	1.49084	1.60195	5.02671	2.74066	4.70432	12.5305	6.08387	19.4544	24.6475	21.7515
ENSG00000075673	479	ATP12A	ATPase H+/K+ transporting non-gastric alpha2 subunit	0	0	0	0	0.448624	1.61092	0	1.39228	0	0	0	0
ENSG00000075702	284403	WDR62	WD repeat domain 62	24.2625	14.7997	13.761	14.1075	4.52891	2.02934	4.09167	4.29128	2.63912	2.33936	3.24349	2.70997
ENSG00000075711	1739	DLG1	discs large MAGUK scaffold protein 1	50.5284	38.1455	50.0259	43.5627	44.4105	48.5578	89.5116	119.526	76.6457	146.346	140.447	127.714
ENSG00000075785	7879	RAB7A	RAB7A, member RAS oncogene family	221.691	221.761	213.42	172.683	234.916	278.815	290.524	315.475	287.553	485.093	317.092	285.663
ENSG00000075790	55973	BCAP29	B cell receptor associated protein 29	16.1542	19.107	23.2072	28.2322	31.2451	26.6744	33.975	52.0103	46.3097	65.8655	46.0875	48.4848
ENSG00000075826	25956	SEC31B	SEC31 homolog B, COPII coat complex component	0.819474	1.398	4.86444	14.7621	6.63214	13.7451	11.1477	4.74901	8.47298	4.76467	9.49536	13.4261
ENSG00000075856	9733	SART3	spliceosome associated factor 3, U4/U6 recycling protein	98.3401	85.7291	101.142	93.2404	89.1178	47.0096	47.3651	51.0566	25.8079	45.1222	50.205	50.0575
ENSG00000075884	55843	ARHGAP15	Rho GTPase activating protein 15	0.735698	1.04047	0.663563	2.35986	2.10725	6.67382	1.31751	2.3459	2.63912	0.865186	1.58181	1.44535
ENSG00000075886	113457	TUBA3D	tubulin alpha 3d	0	0	0.501785	0.533984	0	0	0.500906	0.438664	0.583385	0.772117	0	0
ENSG00000075891	5076	PAX2	paired box 2	0	0	0	0	0.463773	0	0.999235	0.82011	1.13899	3.23376	1.64419	0.643371
ENSG00000075914	23016	EXOSC7	exosome component 7	28.2839	27.0253	27.4336	25.7173	21.0603	22.0717	15.7392	18.8244	34.7531	23.8685	20.4538	21.9205
ENSG00000075945	22920	KIFAP3	kinesin associated protein 3	212.964	203.113	224.114	168.618	213.109	82.952	116.732	223.738	191.934	194.798	174.904	159.492
ENSG00000075975	23609	MKRN2	makorin ring finger protein 2	42.4789	42.6355	35.6403	33.6754	40.2367	42.7417	34.1274	43.7329	35.142	34.084	36.6185	40.4902
ENSG00000076003	4175	MCM6	minichromosome maintenance complex component 6	158.326	104.985	99.7555	74.9472	55.5881	26.4233	21.3508	22.944	21.0296	18.2843	21.3492	21.0436
ENSG00000076043	25996	REXO2	RNA exonuclease 2	6.567	9.32947	10.0959	13.763	12.8092	13.4941	12.3186	13.179	30.3083	18.9455	13.1456	12.6819
ENSG00000076053	10179	RBM7	RNA binding motif protein 7	13.4257	14.5953	12.3416	14.8654	14.264	11.1928	5.626	5.32118	10.751	7.9869	6.64939	5.97854
ENSG00000076067	5939	RBMS2	RNA binding motif single stranded interacting protein 2	7.7137	6.07609	6.31144	5.25371	5.76828	27.4694	9.79166	5.01602	3.19473	6.34452	4.92868	5.62471
ENSG00000076108	11176	BAZ2A	bromodomain adjacent to zinc finger domain 2A	112.631	73.1473	110.219	93.516	77.4607	74.2907	70.3962	61.0887	19.8073	49.3438	61.4957	59.5175
ENSG00000076201	25930	PTPN23	protein tyrosine phosphatase non-receptor type 23	74.4061	82.6635	104.844	95.273	113.873	102.241	89.959	93.1302	44.5873	83.4378	87.4217	92.8496
ENSG00000076242	4292	MLH1	mutL homolog 1	48.3944	38.8468	40.0471	38.3951	34.7822	28.7665	26.7366	26.9492	36.4755	27.7451	30.8027	31.049
ENSG00000076248	7374	UNG	uracil DNA glycosylase	79.8807	70.5877	64.6244	54.2769	49.049	37.5115	26.6734	18.71	27.0302	31.3925	24.0414	26.6846
ENSG00000076258	2329	FMO4	flavin containing monooxygenase 4	0	0	0	0.499533	0.422108	3.91224	0.587898	0.629387	1.30567	2.00206	1.46837	1.47538
ENSG00000076321	27252	KLHL20	kelch like family member 20	24.6368	24.0672	28.6598	25.8551	28.8457	16.9251	14.2858	16.7646	7.80625	16.3754	14.4334	13.3073
ENSG00000076344	8786	RGS11	regulator of G protein signaling 11	0.527988	0.978208	2.40789	6.42503	6.09817	41.9049	39.6159	21.3038	29.9749	20.4642	22.9465	42.4534
ENSG00000076351	113235	SLC46A1	solute carrier family 46 member 1	2.39903	2.75336	2.73545	2.84217	2.73081	2.90803	3.58228	4.36756	2.02796	2.14358	3.23773	3.51231
ENSG00000076356	5362	PLXNA2	plexin A2	266.782	277.923	494.707	272.314	306.412	95.5465	100.282	155.687	28.1414	53.3709	89.3415	85.1491
ENSG00000076382	10615	SPAG5	sperm associated antigen 5	59.985	29.4138	33.8556	35.5702	10.2432	5.58592	5.20542	4.52014	2.47244	3.58557	4.81239	6.29154
ENSG00000076513	88455	ANKRD13A	ankyrin repeat domain 13A	26.7954	24.0388	22.5147	28.8523	27.8797	42.6162	23.3227	25.5379	33.5863	32.6402	32.2126	36.5251
ENSG00000076554	7163	TPD52	tumor protein D52	8.30206	9.70548	12.4609	11.3859	14.3002	25.6283	58.8559	126.85	152.708	232.446	158.308	129.46
ENSG00000076555	32	ACACB	acetyl-CoA carboxylase beta	5.41098	6.20848	12.5803	14.452	13.1237	43.9133	30.1006	18.71	10.1398	15.8885	28.4062	27.7028
ENSG00000076604	9618	TRAF4	TNF receptor associated factor 4	75.726	68.9111	67.3218	57.9975	64.8617	77.2196	43.3342	19.8543	41.1425	20.0953	16.0974	21.2328
ENSG00000076641	55824	PAG1	phosphoprotein membrane anchor with glycosphingolipid microdomains 1	74.4101	78.1581	72.6649	43.9417	105.609	40.0638	35.6674	28.6657	8.47298	18.0758	25.2181	16.3138
ENSG00000076650	55094	GPATCH1	G-patch domain containing 1	15.3185	15.8346	20.1671	24.7527	17.8619	7.8454	9.90679	9.05936	5.36159	8.41448	10.9626	9.19184
ENSG00000076662	3385	ICAM3	intercellular adhesion molecule 3	5.61162	5.63836	5.38709	4.59915	5.05294	14.4983	12.688	10.1656	17.0293	9.57137	9.37396	9.58577
ENSG00000076685	22978	NT5C2	5'-nucleotidase, cytosolic II	45.8387	31.3788	43.0163	36.6037	38.6957	17.762	16.3324	20.045	5.30603	21.6755	20.7053	18.033
ENSG00000076706	4162	MCAM	melanoma cell adhesion molecule	55.0358	26.2559	28.3109	12.7639	20.2226	175.925	88.6567	52.1628	55.0327	60.7353	67.412	86.7082
ENSG00000076716	2239	GPC4	glypican 4	139.261	80.7603	83.1404	31.3672	60.5029	38.3483	25.086	21.2657	14.2513	18.5466	23.749	22.4993
ENSG00000076770	55796	MBNL3	muscleblind like splicing regulator 3	14.7603	10.3429	6.91898	4.73695	3.79199	11.2765	4.30606	4.52014	3.41697	3.1977	6.01765	4.89456
ENSG00000076826	57662	CAMSAP3	calmodulin regulated spectrin associated protein family member 3	79.045	86.8645	118.308	117.631	98.481	60.3154	64.8126	59.9825	33.3641	43.0055	36.4253	36.2543
ENSG00000076864	5909	RAP1GAP	RAP1 GTPase activating protein	71.8958	73.0031	77.8917	62.2694	74.7092	162.159	224.012	274.089	219.103	213.698	278.393	314.441
ENSG00000076924	56949	XAB2	XPA binding protein 2	97.7769	86.3477	86.916	96.1687	91.2212	82.9102	49.9468	53.536	48.1432	49.0894	52.1855	58.3959
ENSG00000076928	9138	ARHGEF1	Rho guanine nucleotide exchange factor 1	15.6195	18.1271	23.1186	58.2042	33.0127	79.2281	43.5244	25.8812	22.5298	19.0499	23.4954	37.6987
ENSG00000076944	6813	STXBP2	syntaxin binding protein 2	1.29061	1.58297	1.32673	1.7053	1.96691	8.51487	3.36133	3.52838	4.69486	2.86073	1.21002	2.3777
ENSG00000076984	5609	MAP2K7	mitogen-activated protein kinase kinase 7	20.3655	25.0682	26.8721	38.9119	24.8266	27.2601	29.6342	30.6111	19.6406	26.8284	27.8084	29.503
ENSG00000077009	27231	NMRK2	nicotinamide riboside kinase 2	0	0	0	0	0	0	0	0.438664	0.750067	0	0	0
ENSG00000077044	8527	DGKD	diacylglycerol kinase delta	111.195	111.815	155.245	103.162	110.274	60.8175	72.9571	67.1918	24.4188	27.8752	47.0746	42.7452
ENSG00000077063	83992	CTTNBP2	cortactin binding protein 2	29.1791	39.6615	74.4418	47.3867	51.3471	17.218	36.9856	48.0814	11.3066	21.6857	37.8031	32.1616
ENSG00000077080	51412	ACTL6B	actin like 6B	105.596	122.915	124.754	111.878	129.064	28.0551	43.7436	64.8269	85.6465	65.593	52.3089	55.2748
ENSG00000077092	5915	RARB	retinoic acid receptor beta	29.0917	18.6234	19.6747	10.0768	7.64558	5.75329	7.33506	10.013	5.08379	6.27529	8.51123	11.2843
ENSG00000077097	7155	TOP2B	DNA topoisomerase II beta	1055.86	792.169	870.212	718.346	671.659	128.434	201.786	223.051	81.3684	161.653	218.724	154.884
ENSG00000077147	56889	TM9SF3	transmembrane 9 superfamily member 3	136.696	161.285	152.807	128.38	158.79	114.878	145.536	177.811	127.095	191.582	179.888	143.978
ENSG00000077150	4791	NFKB2	nuclear factor kappa B subunit 2	8.00334	6.80779	5.93371	5.35706	5.79003	34.7917	8.55164	5.24489	3.97258	3.60129	5.10391	6.5104
ENSG00000077152	29089	UBE2T	ubiquitin conjugating enzyme E2 T	44.6449	30.8528	25.4417	22.0656	11.7824	8.38935	8.58324	10.6614	25.4189	12.79	8.46006	10.1762
ENSG00000077157	4660	PPP1R12B	protein phosphatase 1 regulatory subunit 12B	48.0707	47.2753	65.9376	92.1725	93.1767	57.9304	90.6296	124.981	42.6427	93.5803	120.464	106.689
ENSG00000077232	54431	DNAJC10	DnaJ heat shock protein family (Hsp40) member C10	57.7284	55.8563	56.1064	57.3774	53.0431	38.2646	45.7643	57.8845	32.4751	55.0578	49.4587	49.5113
ENSG00000077235	2975	GTF3C1	general transcription factor IIIC subunit 1	193.785	154.082	170.621	129.207	147.631	100.986	136.469	151.377	44.5873	113.987	131.61	119.1
ENSG00000077238	3566	IL4R	interleukin 4 receptor	4.78394	2.85172	2.45372	1.7053	3.69452	57.4702	7.27582	3.75725	3.75033	5.59677	3.31222	4.70777
ENSG00000077254	23032	USP33	ubiquitin specific peptidase 33	144.763	132.597	136.651	121.318	137.574	52.4491	71.8879	117.695	99.5922	109.589	104.782	90.4049
ENSG00000077264	5063	PAK3	p21 (RAC1) activated kinase 3	177.564	163.879	156.451	142.815	166.612	31.4444	74.8076	229.002	105.815	111.829	147.259	118.912
ENSG00000077274	827	CAPN6	calpain 6	1.92179	0.800426	0.865484	1.91201	1.13513	0	0	0	0	0	0	0
ENSG00000077279	1641	DCX	doublecortin	2455.02	2215.78	2435.88	2071.22	2658.28	157.389	88.7329	49.7216	18.3072	23.5133	29.6527	17.3343
ENSG00000077312	6626	SNRPA	small nuclear ribonucleoprotein polypeptide A	83.0004	74.5376	62.2642	56.4128	46.2645	47.0933	28.0853	19.778	25.8079	23.4144	22.8087	25.101
ENSG00000077327	9576	SPAG6	sperm associated antigen 6	1.01351	1.29535	0	0	1.15755	17.7201	7.45805	15.4295	2.97249	1.00746	2.4569	1.62457
ENSG00000077348	56915	EXOSC5	exosome component 5	21.5278	27.916	20.4992	15.4511	20.684	26.5907	17.9094	22.0667	38.9201	21.2011	17.853	20.6784
ENSG00000077380	1781	DYNC1I2	dynein cytoplasmic 1 intermediate chain 2	316.352	228.059	255.886	221.224	222.62	96.0068	67.59	91.223	93.3139	116.943	97.4669	102.939
ENSG00000077420	54518	APBB1IP	amyloid beta precursor protein binding family B member 1 interacting protein	1.06001	1.84484	1.17571	2.22206	6.09482	11.6949	5.96768	10.4707	10.2509	10.4535	3.52835	6.05359
ENSG00000077454	4034	LRCH4	leucine rich repeats and calponin homology domain containing 4	11.619	16.486	18.2529	27.0954	19.4634	43.997	29.5151	20.312	15.9181	16.8672	21.9842	28.4449
ENSG00000077458	143684	FAM76B	family with sequence similarity 76 member B	28.3193	37.2454	33.9808	43.9072	31.8606	9.72829	7.27494	6.38923	6.02831	7.9026	7.34585	6.59573
ENSG00000077463	51548	SIRT6	sirtuin 6	26.4659	31.629	26.3647	28.8523	26.4764	30.1891	18.1001	13.5986	18.6961	13.3061	11.6213	13.1084
ENSG00000077514	10714	POLD3	DNA polymerase delta 3, accessory subunit	45.2425	31.5779	32.9628	28.1978	21.352	11.5275	8.96095	7.99131	6.63948	8.35065	7.92604	7.47421
ENSG00000077522	88	ACTN2	actinin alpha 2	4.51366	7.91907	23.0134	66.6791	25.6734	41.6538	40.1873	61.4701	35.9199	54.9948	75.4881	80.9519
ENSG00000077549	832	CAPZB	capping actin protein of muscle Z-line subunit beta	166.159	155.788	141.253	125.348	152.58	213.248	178.634	203.559	206.768	229.669	190.674	181.467
ENSG00000077585	7107	GPR137B	G protein-coupled receptor 137B	19.3618	20.7928	18.642	20.8254	29.9692	108.685	48.9621	38.0875	43.4205	49.6056	54.2574	50.2842
ENSG00000077616	10003	NAALAD2	N-acetylated alpha-linked acidic dipeptidase 2	4.23683	3.17679	2.45561	2.66992	2.22932	2.94987	3.8964	2.15517	2.91693	4.31441	4.24691	4.87339
ENSG00000077684	79960	JADE1	jade family PHD finger 1	127.884	93.1303	103.077	108.158	75.9371	46.5912	34.3173	27.7884	26.8635	34.536	39.4448	33.3532
ENSG00000077713	203427	SLC25A43	solute carrier family 25 member 43	3.71289	2.71489	2.97565	4.53025	3.66921	12.4062	5.596	4.482	3.86145	4.7479	4.51018	3.78925
ENSG00000077721	7319	UBE2A	ubiquitin conjugating enzyme E2 A	46.8006	61.0128	49.2512	50.7629	55.5449	48.0138	50.5437	55.3288	117.149	72.9232	61.1266	56.007
ENSG00000077782	2260	FGFR1	fibroblast growth factor receptor 1	110.606	87.4033	78.975	38.2918	64.1836	180.863	114.109	78.1012	34.8087	70.2247	80.6149	72.3067
ENSG00000077809	---	---	---	87.0492	56.7064	85.3768	71.8466	77.2526	32.4904	35.5971	45.8308	5.75051	30.6663	33.9076	30.5582
ENSG00000077942	2192	FBLN1	fibulin 1	212.879	163.826	168.766	127.863	148.268	128.393	120.024	66.2764	27.6413	45.3581	39.9846	51.9658
ENSG00000077943	8516	ITGA8	integrin subunit alpha 8	1.15233	1.00672	1.373	1.4297	3.19629	6.29724	7.36541	8.37275	1.75016	7.06122	4.77492	4.00718
ENSG00000077984	8530	CST7	cystatin F	0	0	0	0	0	0.774079	0	0	0.750067	0.752095	0	0
ENSG00000078018	4133	MAP2	microtubule associated protein 2	1817.99	1589.94	1697.76	1074.32	1715.77	447.313	914.27	2109.23	927.61	1321.91	1327.25	1128.92
ENSG00000078043	9063	PIAS2	protein inhibitor of activated STAT 2	28.8253	36.986	29.1605	32.2629	33.6363	28.7246	29.0269	32.7091	25.8079	36.1966	35.2809	29.3425
ENSG00000078053	273	AMPH	amphiphysin	83.2611	76.5062	74.4621	30.506	55.756	42.8673	77.1876	209.624	129.373	147.183	152.126	132.752
ENSG00000078061	369	ARAF	A-Raf proto-oncogene, serine/threonine kinase	28.1664	26.6872	24.8396	27.6121	24.297	48.5578	30.2606	17.9471	23.8632	23.6712	19.2857	25.3548
ENSG00000078070	56922	MCCC1	methylcrotonoyl-CoA carboxylase 1	24.4705	23.4687	31.3027	36.9138	35.7859	16.9251	28.7026	27.7884	25.2522	24.7077	28.3081	29.7851
ENSG00000078098	2191	FAP	fibroblast activation protein alpha	0.547044	0	0	0	0.488333	1.06697	0.882913	0.934544	2.13908	0.739935	0.683224	0.902492
ENSG00000078114	10529	NEBL	nebulette	18.919	38.5595	25.8946	20.8598	39.8985	100.693	132.886	151.72	116.427	189.195	228.7	196.052
ENSG00000078124	55331	ACER3	alkaline ceramidase 3	22.0867	27.7228	27.0975	31.4706	37.8957	34.1641	43.5699	53.536	57.6996	62.3219	67.8109	53.5101
ENSG00000078140	3093	UBE2K	ubiquitin conjugating enzyme E2 K	131.623	162.86	150.49	113.497	132.37	59.7715	105.174	186.508	121.761	167.527	150.776	121.699
ENSG00000078142	5289	PIK3C3	phosphatidylinositol 3-kinase catalytic subunit type 3	47.2701	37.9538	46.251	37.4305	41.0955	22.8667	22.7873	38.7359	18.9183	36.9848	31.3609	27.0931
ENSG00000078177	55728	N4BP2	NEDD4 binding protein 2	49.2716	40.034	40.8144	30.7127	31.6667	8.51487	10.7253	7.60986	2.19464	4.58418	6.21971	2.94002
ENSG00000078237	57103	TIGAR	TP53 induced glycolysis regulatory phosphatase	8.79637	7.80832	7.53668	4.25464	6.53436	4.03777	6.29533	12.0346	11.4732	8.48194	6.70372	6.09683
ENSG00000078246	7289	TULP3	TUB like protein 3	45.5676	40.5784	41.4621	46.9044	37.9409	56.2149	17.3615	11.1192	14.4179	12.1998	20.7007	18.4016
ENSG00000078269	8871	SYNJ2	synaptojanin 2	2.08538	7.64836	7.43405	7.28629	5.81098	6.67382	31.734	108.808	41.9204	138.979	140.365	131.562
ENSG00000078295	108	ADCY2	adenylate cyclase 2	47.9564	44.4894	44.1858	23.0991	56.5284	262.999	140.361	201.499	98.8699	174.767	152.981	175.165
ENSG00000078304	5527	PPP2R5C	protein phosphatase 2 regulatory subunit B'gamma	140.086	137.675	130.314	133.685	149.13	124.752	133.004	184.258	158.542	183.724	184.405	160.712
ENSG00000078319	---	---	---	5.71257	5.41575	5.61895	5.11591	4.73677	7.21777	4.48411	4.02426	11.0843	6.25233	5.24929	5.7895
ENSG00000078328	54715	RBFOX1	RNA binding fox-1 homolog 1	109.229	138.12	174.592	88.5207	130.779	48.3486	98.2084	258.754	140.096	195.572	219.36	163.694
ENSG00000078369	2782	GNB1	G protein subunit beta 1	1325.16	1276.87	1353.77	1069.64	1353.97	674.432	812.553	1074.33	906.997	1038.32	883.013	865.115
ENSG00000078401	1906	EDN1	endothelin 1	2.70105	3.1477	3.46259	2.66992	2.16162	66.8846	9.26161	5.1686	4.47262	3.90904	3.05406	4.19554
ENSG00000078403	8028	MLLT10	MLLT10 histone lysine methyltransferase DOT1L cofactor	50.612	33.0826	41.7834	50.5906	34.4358	23.4525	16.485	15.1625	7.63957	10.5503	16.4507	15.5674
ENSG00000078487	55063	ZCWPW1	zinc finger CW-type and PWWP domain containing 1	2.04538	2.26662	2.7771	4.7025	4.26826	6.33908	5.6052	6.19851	10.6954	7.32793	6.37393	7.53516
ENSG00000078549	117	ADCYAP1R1	ADCYAP receptor type I	104.369	114.39	153.831	84.9379	167.59	259.819	324.516	197.685	99.87	218.224	254.53	244.725
ENSG00000078579	26281	FGF20	fibroblast growth factor 20	0	0	0	0	0	0	0	0.438664	0.750067	0	0	0
ENSG00000078596	9452	ITM2A	integral membrane protein 2A	91.081	63.1533	41.6548	32.9175	57.9897	474.594	144.664	81.5342	149.652	70.8846	68.7373	75.1689
ENSG00000078618	4898	NRDC	nardilysin convertase	184.817	147.13	164.007	150.566	130.761	76.2573	95.8242	118.916	87.8134	130.98	123.189	122.164
ENSG00000078668	7419	VDAC3	voltage dependent anion channel 3	140.845	180.552	135.02	132.962	156.171	95.2118	104.505	137.187	221.159	152.013	150.034	137.609
ENSG00000078674	5108	PCM1	pericentriolar material 1	245.688	151.096	225.222	211.371	178.109	67.7215	87.3471	120.175	29.586	81.8369	110.347	91.8967
ENSG00000078687	57690	TNRC6C	trinucleotide repeat containing adaptor 6C	46.6704	51.8445	85.155	69.7452	54.7187	31.5699	61.5471	60.4402	10.1954	28.7421	56.1588	39.1135
ENSG00000078699	9139	CBFA2T2	CBFA2/RUNX1 translocation partner 2	63.6283	90.4843	97.0879	97.6501	99.2261	42.7417	38.618	46.5937	20.3074	27.4908	43.8537	45.1617
ENSG00000078725	1620	BRINP1	BMP/retinoic acid inducible neural specific 1	72.8428	58.1822	65.1519	55.7927	49.751	63.8302	169.614	225.378	114.482	131.201	153.725	119.875
ENSG00000078747	83737	ITCH	itchy E3 ubiquitin protein ligase	51.4952	45.6696	50.708	46.0776	50.4333	36.7165	37.0663	70.0145	46.1986	65.8272	72.8611	65.3461
ENSG00000078795	27039	PKD2L2	polycystin 2 like 2, transient receptor potential cation channel	0	0	0	0	0	0	0	0	0.416704	0	0	0
ENSG00000078804	58476	TP53INP2	tumor protein p53 inducible nuclear protein 2	38.808	61.0617	60.731	55.9649	88.9291	111.112	503.258	612.127	513.073	839.838	505.648	612.062
ENSG00000078808	51150	SDF4	stromal cell derived factor 4	77.1119	80.5755	77.2064	76.4975	77.8324	147.765	116.394	84.1662	92.8694	75.8277	78.7477	92.9055
ENSG00000078814	57644	MYH7B	myosin heavy chain 7B	0.401877	0.441322	0.910081	2.04981	0.861169	4.87461	10.1687	11.6532	7.08396	11.1337	14.637	17.8467
ENSG00000078900	7161	TP73	tumor protein p73	5.25566	1.54112	2.08641	1.7053	1.6463	6.63198	5.43375	4.74901	1.86128	1.11231	2.21788	1.77042
ENSG00000078902	54472	TOLLIP	toll interacting protein	65.3571	98.3762	77.8586	62.5794	93.2764	135.338	224.152	406.718	287.887	323.44	348.331	308.144
ENSG00000078967	51619	UBE2D4	ubiquitin conjugating enzyme E2 D4 (putative)	11.8254	20.9425	16.1647	16.9669	21.3518	32.2812	28.6803	23.1347	40.0313	26.8356	30.0355	27.9201
ENSG00000079101	27098	CLUL1	clusterin like 1	4.53029	2.99216	3.83131	1.73975	2.58124	1.77829	2.72463	9.40266	4.69486	5.52328	4.80908	4.02327
ENSG00000079102	862	RUNX1T1	RUNX1 translocation partner 1	207.793	121.124	153.092	108.915	84.6402	16.8833	28.1517	46.8226	20.9741	24.6403	34.6785	26.2918
ENSG00000079134	9984	THOC1	THO complex 1	14.084	16.0419	19.8012	41.5301	16.7513	10.4815	10.5978	7.15213	2.91693	7.61689	9.71651	9.24209
ENSG00000079150	51661	FKBP7	FKBP prolyl isomerase 7	8.24962	8.70996	8.12508	8.38871	8.15506	5.9625	2.92411	1.73558	2.91693	2.40842	2.15929	1.7025
ENSG00000079156	114880	OSBPL6	oxysterol binding protein like 6	10.9487	14.1783	24.9322	21.5488	33.321	22.4901	27.3522	39.3081	18.4183	25.4745	27.9983	24.0903
ENSG00000079215	6507	SLC1A3	solute carrier family 1 member 3	253.133	278.467	269.377	158.696	475.731	837.491	1165.79	535.456	460.458	819.741	871.918	711.897
ENSG00000079246	7520	XRCC5	X-ray repair cross complementing 5	852.589	652.744	583.237	430.305	487.427	167.515	143.781	198.066	156.82	221.255	179.841	176.693
ENSG00000079257	56925	LXN	latexin	3.21903	3.94077	2.6527	4.59915	3.5588	7.25961	3.93607	6.80882	12.3622	5.46599	3.48328	3.75706
ENSG00000079263	11262	SP140	SP140 nuclear body protein	0	0	0	0	0	0.564869	0.834743	0.591242	0	0.749776	0.648333	0
ENSG00000079277	8569	MKNK1	MAPK interacting serine/threonine kinase 1	5.53894	7.43553	7.53441	11.3859	10.0968	33.913	24.4811	17.3368	20.9185	12.0551	19.3629	21.2417
ENSG00000079308	7145	TNS1	tensin 1	15.5569	14.5456	18.8004	10.9036	24.6619	205.549	108.52	76.3466	10.4732	78.9639	77.4128	83.8428
ENSG00000079313	57455	REXO1	RNA exonuclease 1 homolog	31.1122	32.5158	40.1185	41.4612	34.5365	42.407	70.049	69.1754	41.5315	62.5032	59.6193	61.3733
ENSG00000079332	56681	SAR1A	secretion associated Ras related GTPase 1A	128.583	153.498	125.731	111.465	127.708	100.024	95.9685	103.467	96.6475	97.6073	111.216	89.1953
ENSG00000079335	8556	CDC14A	cell division cycle 14A	6.53781	4.90221	4.54505	3.87569	4.40828	7.63619	5.68867	4.17684	2.528	5.12071	4.90049	3.69957
ENSG00000079337	10411	RAPGEF3	Rap guanine nucleotide exchange factor 3	3.50385	8.03081	8.9178	19.2062	14.2369	71.6965	44.3515	32.6328	33.0863	35.6786	48.1359	62.6087
ENSG00000079385	634	CEACAM1	carcinoembryonic antigen related cell adhesion molecule 1	0	0	0	0	0	0	0.674106	0	0	0	0.450973	0
ENSG00000079387	29843	SENP1	SUMO specific peptidase 1	35.8447	31.146	28.5151	23.7192	22.0557	9.89566	8.91596	6.9614	3.52809	8.82535	8.1089	6.18871
ENSG00000079393	51207	DUSP13	dual specificity phosphatase 13	0	0	0	0	0	0.606711	0.638741	0.781966	2.30576	0.769379	0.542659	0.511002
ENSG00000079432	23152	CIC	capicua transcriptional repressor	112.391	137.555	206.466	192.32	184.578	205.424	224.694	205.619	91.7582	141.269	154.98	165.505
ENSG00000079435	3991	LIPE	lipase E, hormone sensitive type	21.4699	20.296	18.6044	14.5554	14.3233	13.243	15.6708	22.41	23.4743	36.9017	32.7708	40.1129
ENSG00000079459	2222	FDFT1	farnesyl-diphosphate farnesyltransferase 1	418.183	258.907	285.83	143.952	184.994	101.153	106.785	147.715	189.656	193.344	160.814	151.381
ENSG00000079462	5050	PAFAH1B3	platelet activating factor acetylhydrolase 1b catalytic subunit 3	252.841	286.999	218.512	194.663	190.942	80.5252	55.7322	32.6328	57.8663	30.2341	28.6923	28.4785
ENSG00000079482	4983	OPHN1	oligophrenin 1	44.6183	32.2816	44.1305	38.6363	48.7719	43.8296	32.579	35.7988	7.52845	29.0549	37.0791	30.9413
ENSG00000079616	3835	KIF22	kinesin family member 22	156.91	98.5924	93.3223	93.206	50.5057	32.1975	32.4642	24.3554	43.6428	21.8172	23.557	28.4
ENSG00000079689	10590	SCGN	secretagogin, EF-hand calcium binding protein	19.8893	38.7984	22.1316	89.0719	54.1328	5.25119	2.16422	1.92631	2.36132	2.61126	1.69596	2.17528
ENSG00000079691	55604	CARMIL1	capping protein regulator and myosin 1 linker 1	15.0778	18.2993	20.09	19.9985	33.8626	44.6246	44.2342	25.4234	15.5847	19.7529	35.5945	28.3172
ENSG00000079739	5236	PGM1	phosphoglucomutase 1	37.2603	34.3286	29.6749	22.0311	35.2435	122.953	68.2031	59.4866	76.6457	70.9731	65.5139	67.3168
ENSG00000079785	1653	DDX1	DEAD-box helicase 1	172.955	153.324	156.485	152.082	143.521	72.4078	87.5355	133.525	160.598	139.843	131.731	126.09
ENSG00000079805	1785	DNM2	dynamin 2	80.872	74.2998	86.4001	74.706	94.2039	224.588	98.3717	83.0982	70.2563	83.5425	90.5093	107.767
ENSG00000079819	2037	EPB41L2	erythrocyte membrane protein band 4.1 like 2	35.3607	19.807	27.579	28.0255	47.4389	137.723	142.601	178.918	84.1464	201.668	154.291	173.697
ENSG00000079841	22999	RIMS1	regulating synaptic membrane exocytosis 1	38.1988	42.1324	50.8913	40.3933	58.3329	33.3273	164.682	284.845	108.76	184.236	179.283	108.094
ENSG00000079931	26002	MOXD1	monooxygenase DBH like 1	68.8846	108.175	75.6839	46.4221	107.5	56.7588	40.2245	73.4857	42.9205	69.9963	68.4232	40.6827
ENSG00000079950	8417	STX7	syntaxin 7	169.731	164.625	187.033	128.173	179.423	70.776	70.0184	98.356	65.4225	119.62	86.291	77.6571
ENSG00000079974	11158	RABL2B	RAB, member of RAS oncogene family like 2B	20.6803	21.5614	21.9553	20.9632	19.8598	16.3394	18.0065	15.2007	18.3627	15.6269	13.8947	17.5429
ENSG00000079999	9817	KEAP1	kelch like ECH associated protein 1	62.868	61.9871	65.2521	60.5813	68.5273	69.5207	70.9383	68.6795	85.0909	61.6326	64.9084	76.6962
ENSG00000080007	55510	DDX43	DEAD-box helicase 43	0	0	0	0	0	0	0	0	0	0.532657	0	0
ENSG00000080031	5794	PTPRH	protein tyrosine phosphatase receptor type H	0	0	0	0	0	0	2.03121	4.02426	1.63903	5.36621	4.90682	5.08902
ENSG00000080166	1638	DCT	dopachrome tautomerase	0	0	0	0	0	3.95408	1.21725	1.69744	0.805627	0.872983	2.11517	2.41946
ENSG00000080189	51006	SLC35C2	solute carrier family 35 member C2	30.7242	41.7741	29.538	38.1884	35.7814	71.6546	53.2149	39.4607	53.7548	43.99	40.655	45.6733
ENSG00000080200	131544	CRYBG3	crystallin beta-gamma domain containing 3	5.08019	2.24518	3.25388	2.84217	3.78711	6.33908	3.50477	4.93973	0.527825	3.91618	7.03494	5.70532
ENSG00000080224	285220	EPHA6	EPH receptor A6	4.19011	3.34597	5.46608	4.87475	4.07522	1.23434	3.32079	33.3957	1.13899	9.39057	10.957	7.78174
ENSG00000080293	6344	SCTR	secretin receptor	0	0	0	0	0	0	0.444118	0	0	0	0	0
ENSG00000080298	5991	RFX3	regulatory factor X3	132.393	93.1502	92.4062	85.3857	82.8283	40.1894	44.8743	54.0319	21.363	34.5584	41.8493	32.1104
ENSG00000080345	55183	RIF1	replication timing regulatory factor 1	76.2494	73.2065	84.5561	79.3913	71.6427	26.2559	34.573	55.3288	27.3635	43.9408	60.2239	39.7636
ENSG00000080371	23011	RAB21	RAB21, member RAS oncogene family	56.7263	66.6485	57.0815	47.4901	54.3203	51.8215	52.667	66.5052	75.5901	101.222	89.8989	69.6933
ENSG00000080493	8671	SLC4A4	solute carrier family 4 member 4	24.1985	39.3913	23.5193	19.5507	56.6271	167.808	208.545	101.598	93.0361	128.558	175.471	131.307
ENSG00000080503	6595	SMARCA2	SWI/SNF related, matrix associated, actin dependent regulator of chromatin, subfamily a, member 2	138.966	207.879	261.747	200.554	251.495	163.582	238.087	266.917	139.874	237.103	255.769	208.166
ENSG00000080546	27244	SESN1	sestrin 1	19.2233	25.9135	22.8054	30.3337	24.8983	25.2099	23.6341	41.3297	41.6982	58.2168	46.5577	50.9965
ENSG00000080561	11043	MID2	midline 2	6.55142	4.3423	3.95472	1.94646	3.90556	4.41434	4.7751	5.58819	1.80572	5.90747	5.08862	4.75006
ENSG00000080572	139212	PIH1D3	PIH1 domain containing 3	0	0	0	0	0	1.82013	0	1.04898	0.472264	0	0	0
ENSG00000080573	50509	COL5A3	collagen type V alpha 3 chain	1.47934	2.35106	1.89769	4.6336	6.62138	46.0891	48.7529	33.8915	25.2522	13.3055	25.7493	43.1058
ENSG00000080603	10847	SRCAP	Snf2 related CREBBP activator protein	142.789	180.197	224.523	189.151	184.788	95.2536	156.835	159.769	40.8092	118.814	127.342	112.307
ENSG00000080608	9933	PUM3	pumilio RNA binding family member 3	20.7522	17.0557	18.8445	19.3095	14.4595	6.7575	6.86872	9.0975	5.08379	7.4711	8.61585	5.95864
ENSG00000080618	1361	CPB2	carboxypeptidase B2	0	0	0	0.430632	0	0	0	0	0	0	0	0
ENSG00000080644	1136	CHRNA3	cholinergic receptor nicotinic alpha 3 subunit	3.36051	5.45135	3.35365	1.4297	1.36535	0.690395	2.48139	2.84178	1.58347	3.27614	1.97574	1.79665
ENSG00000080709	3781	KCNN2	potassium calcium-activated channel subfamily N member 2	2.2339	3.30145	6.57559	3.29003	5.70247	7.17592	13.0649	20.6553	11.5844	9.54597	11.365	10.3603
ENSG00000080802	4850	CNOT4	CCR4-NOT transcription complex subunit 4	44.7132	41.2223	48.5485	40.7033	53.0594	26.3815	32.5798	37.3246	22.6965	46.4226	38.8681	30.4217
ENSG00000080815	5663	PSEN1	presenilin 1	97.1882	105.712	100.408	97.5123	106.991	71.4454	59.666	85.0054	81.7573	120.722	111.409	116.375
ENSG00000080819	1371	CPOX	coproporphyrinogen oxidase	18.5288	15.1986	15.6701	12.8328	12.7092	19.4357	15.9477	25.4997	25.53	29.0201	28.7049	32.4908
ENSG00000080822	56650	CLDND1	claudin domain containing 1	50.1773	68.3723	48.9445	56.7573	62.3084	87.0107	58.6863	141.383	210.88	597.161	287.379	340.104
ENSG00000080823	5891	MOK	MOK protein kinase	8.17102	10.7167	16.0237	22.1689	13.2922	19.9378	20.612	15.3532	14.0846	10.7823	12.2517	14.127
ENSG00000080824	3320	HSP90AA1	heat shock protein 90 alpha family class A member 1	1810.91	1337.11	1519.02	1019	1095.19	680.416	989.977	1753.45	1882.03	1905.49	1515.78	1633.68
ENSG00000080839	5933	RBL1	RB transcriptional corepressor like 1	21.5082	16.1931	18.2133	19.8263	11.6555	4.49803	3.26198	2.30775	1.47235	1.80084	3.7261	2.43568
ENSG00000080845	22839	DLGAP4	DLG associated protein 4	195.272	199.796	215.996	210.751	217.728	131.112	201.131	258.869	105.537	216.656	175.063	148.992
ENSG00000080854	22997	IGSF9B	immunoglobulin superfamily member 9B	12.6855	11.1082	16.491	10.8347	4.7906	4.12145	16.7873	12.5305	2.08352	4.58072	6.57407	5.59999
ENSG00000080947	114819	CROCCP3	CROCC pseudogene 3	1.36866	2.0609	5.41863	15.4166	4.99486	7.5525	8.48128	5.43562	3.41697	2.44101	5.7096	4.87988
ENSG00000080986	10403	NDC80	NDC80 kinetochore complex component	46.4814	23.4363	21.4416	23.5814	5.2317	2.36408	0.961475	0.400519	0	0	0	0
ENSG00000081014	23431	AP4E1	adaptor related protein complex 4 subunit epsilon 1	11.1678	11.2947	13.1925	13.2462	12.9845	4.74908	7.39964	9.47895	4.0837	6.25693	9.80337	7.04348
ENSG00000081019	54665	RSBN1	round spermatid basic protein 1	115.167	92.6132	79.3529	62.6139	67.3651	28.5573	24.4646	22.4481	16.307	27.0258	26.5363	19.8474
ENSG00000081026	260425	MAGI3	membrane associated guanylate kinase, WW and PDZ domain containing 3	58.2085	46.199	54.3749	66.4724	63.0465	27.5949	37.2683	45.869	18.585	25.4843	41.7868	32.3705
ENSG00000081041	2920	CXCL2	C-X-C motif chemokine ligand 2	0	0	0	0	0	5.58592	0.965692	0	0.694506	0.487548	0.905989	0.41337
ENSG00000081051	174	AFP	alpha fetoprotein	0	0	0	0	0	0	0	0.438664	0	0	0	0
ENSG00000081052	1286	COL4A4	collagen type IV alpha 4 chain	0	0.733774	0.418965	0.775138	1.06177	0.439342	2.86513	3.33766	1.02787	3.12488	2.99519	2.57939
ENSG00000081059	6932	TCF7	transcription factor 7	2.5158	1.92396	2.02926	1.67085	3.38259	7.42698	5.33324	4.1387	1.91684	2.0018	2.90295	2.26349
ENSG00000081087	28962	OSTM1	osteoclastogenesis associated transmembrane protein 1	18.2806	25.1584	22.3612	17.587	25.9201	19.0591	23.6717	32.3658	27.5302	32.3247	23.4903	23.2139
ENSG00000081138	1005	CDH7	cadherin 7	11.5657	10.4454	4.93777	1.4297	1.47121	0	2.87681	4.52014	0.861188	2.31814	2.65449	2.01081
ENSG00000081148	50939	IMPG2	interphotoreceptor matrix proteoglycan 2	0	0	0	0.878489	0.441875	0	0.490505	0	0	0	0	0
ENSG00000081154	57092	PCNP	PEST proteolytic signal containing nuclear protein	115.672	129.304	100.221	103.851	98.0435	95.421	87.7578	107.816	179.71	155.716	130.722	119.153
ENSG00000081177	55218	EXD2	exonuclease 3'-5' domain containing 2	58.2819	54.4571	56.3073	47.1111	60.7007	48.1394	39.8819	52.6206	35.4754	51.4492	51.6318	47.6566
ENSG00000081181	384	ARG2	arginase 2	32.4882	24.8448	23.6472	13.1084	19.5752	6.12987	6.68407	11.8058	8.25073	6.25836	5.82565	5.83762
ENSG00000081189	4208	MEF2C	myocyte enhancer factor 2C	117.836	189.616	364.741	636.836	320.131	191.365	250.052	488.767	241.994	320.376	311.734	203.257
ENSG00000081237	5788	PTPRC	protein tyrosine phosphatase receptor type C	0.935932	0.944632	0.755098	1.01629	3.64403	11.3183	3.88944	7.41914	2.41688	5.47596	2.79868	4.70758
ENSG00000081248	779	CACNA1S	calcium voltage-gated channel subunit alpha1 S	0	0	0	0	0.504087	0.774079	2.91765	2.99436	1.47235	2.41836	2.03985	2.29909
ENSG00000081277	5317	PKP1	plakophilin 1	0	0	0	0	0	0	0.715013	0.476808	0.805627	1.60593	1.14419	1.02235
ENSG00000081307	79876	UBA5	ubiquitin like modifier activating enzyme 5	36.0062	43.8886	44.5245	48.7648	47.1484	26.4651	29.8882	40.1091	32.5307	37.4432	34.0411	34.3129
ENSG00000081320	9262	STK17B	serine/threonine kinase 17b	9.05657	5.14367	4.68966	4.97811	5.58322	15.0841	6.18483	3.60467	3.19473	6.95508	5.24824	4.01355
ENSG00000081377	8555	CDC14B	cell division cycle 14B	12.5167	11.561	13.15	21.2732	18.3188	46.7586	27.6294	26.7203	24.6411	29.2183	36.8486	34.9127
ENSG00000081386	22869	ZNF510	zinc finger protein 510	29.9255	23.1957	28.372	25.1317	26.3947	7.0504	11.0412	14.4378	8.52854	13.0996	13.3463	10.5579
ENSG00000081479	4036	LRP2	LDL receptor related protein 2	26.7415	13.529	10.6576	2.91107	2.65968	1.23434	1.39719	5.43562	3.58365	14.1484	20.1477	36.3145
ENSG00000081665	440515	ZNF506	zinc finger protein 506	10.5351	10.0843	12.6096	13.1773	12.0419	7.5525	5.98716	6.80882	5.41715	8.17532	7.05924	7.57688
ENSG00000081692	65094	JMJD4	jumonji domain containing 4	6.23178	11.3739	7.30578	7.493	6.82869	15.5443	8.77644	9.25008	14.9736	9.35878	8.30979	9.38487
ENSG00000081721	11266	DUSP12	dual specificity phosphatase 12	22.7979	25.8689	25.2591	26.3719	21.4413	13.4104	10.0075	12.3398	18.4739	11.5513	9.44606	11.4854
ENSG00000081760	65985	AACS	acetoacetyl-CoA synthetase	59.463	58.5959	66.0183	52.2098	57.2214	33.4528	51.4838	90.0023	56.0883	60.6583	71.9314	68.2961
ENSG00000081791	9812	DELE1	DAP3 binding cell death enhancer 1	33.7867	30.3897	28.1447	30.6438	38.7052	72.8681	44.3856	22.0285	35.3087	38.3102	37.4983	42.8243
ENSG00000081803	93664	CADPS2	calcium dependent secretion activator 2	11.4086	9.32239	8.05002	4.11684	7.25378	12.9083	23.4278	75.4311	40.5869	33.6582	51.3873	31.7339
ENSG00000081818	56131	PCDHB4	protocadherin beta 4	4.90129	7.27777	7.57641	7.04514	7.03623	7.00856	7.62678	13.1408	3.41697	11.8415	9.08604	9.8562
ENSG00000081842	56142	PCDHA6	protocadherin alpha 6	5.20336	4.97579	6.20549	3.39338	6.95937	1.9875	3.61533	8.67791	0	2.46399	2.84831	2.42323
ENSG00000081853	56113	PCDHGA2	protocadherin gamma subfamily A, 2	13.8785	10.0581	11.8749	4.6336	11.3334	7.09224	6.61221	6.31294	0.972309	4.17614	4.46447	3.75568
ENSG00000081870	51668	HSPB11	heat shock protein family B (small) member 11	12.35	12.2115	11.0282	15.4166	9.07221	13.1593	9.86061	8.90678	29.0859	14.2491	13.1844	13.7967
ENSG00000081913	23239	PHLPP1	PH domain and leucine rich repeat protein phosphatase 1	150.242	107.855	120.886	73.328	104.235	142.577	154.263	118.763	48.1432	140.455	162.764	154.034
ENSG00000081923	5205	ATP8B1	ATPase phospholipid transporting 8B1	1.6925	1.33671	1.02263	0.878489	2.3517	5.33487	4.39455	2.99436	1.47235	2.14744	2.21987	2.17554
ENSG00000081985	3595	IL12RB2	interleukin 12 receptor subunit beta 2	0	0	0.682991	2.11871	2.28058	1.1925	3.04485	22.4481	3.02805	2.41022	2.12333	4.13465
ENSG00000082014	6604	SMARCD3	SWI/SNF related, matrix associated, actin dependent regulator of chromatin, subfamily d, member 3	173.292	277.734	194.082	176.128	221.978	340.992	217.839	152.903	558.355	268.944	147.477	201.225
ENSG00000082068	55100	WDR70	WD repeat domain 70	46.3861	38.2312	38.9276	36.5348	32.9105	14.833	12.1199	12.7212	17.2515	13.4844	13.2343	14.6276
ENSG00000082074	2533	FYB1	FYN binding protein 1	0	0	0.482064	0.91294	2.04877	4.41434	1.34756	2.95621	1.19455	1.0898	0.850092	1.16894
ENSG00000082126	58538	MPP4	membrane palmitoylated protein 4	0	0	0	0	0	0.439342	0	0	0	0	0	0
ENSG00000082146	55437	STRADB	STE20 related adaptor beta	22.8102	26.1118	22.5428	23.4781	23.4035	38.0973	27.3979	20.2357	30.1416	25.8473	23.0552	21.7025
ENSG00000082153	9689	BZW1	basic leucine zipper and W2 domains 1	153.36	130.587	111.733	82.2163	98.4656	66.4244	60.5186	78.7878	62.5889	56.3302	57.4873	48.4232
ENSG00000082175	5241	PGR	progesterone receptor	0	0	0	0	0	0	0	0	0	0.847245	1.51696	1.64438
ENSG00000082196	114899	C1QTNF3	C1q and TNF related 3	2.13561	5.68283	4.66421	9.28443	15.0469	11.1091	12.3523	7.3047	18.5294	9.0215	7.2542	6.86301
ENSG00000082212	4200	ME2	malic enzyme 2	60.5252	62.391	60.7711	51.1419	62.7523	52.7838	39.5538	50.5608	36.1977	59.3205	43.4451	40.78
ENSG00000082213	55322	C5orf22	chromosome 5 open reading frame 22	20.6037	24.2369	19.0185	16.9669	20.6852	12.1551	16.9154	27.1399	24.6411	29.6229	27.2528	26.5223
ENSG00000082258	905	CCNT2	cyclin T2	75.503	65.4678	62.9696	89.6231	58.446	31.8628	29.4225	34.807	25.8634	29.0352	38.3992	34.8118
ENSG00000082269	57579	FAM135A	family with sequence similarity 135 member A	30.3391	36.6046	39.2676	30.4371	37.8325	16.6741	27.3235	33.1286	15.418	28.8545	23.676	19.5214
ENSG00000082293	1310	COL19A1	collagen type XIX alpha 1 chain	1.02676	1.20203	2.08442	1.05074	2.96151	1.40171	3.70853	9.13565	2.08352	2.42995	4.39694	2.37065
ENSG00000082397	23136	EPB41L3	erythrocyte membrane protein band 4.1 like 3	69.7214	68.2121	119.055	74.7749	135.157	43.2438	102.539	201.194	71.7564	204.979	183.326	197.154
ENSG00000082438	22837	COBLL1	cordon-bleu WH2 repeat protein like 1	8.50938	6.92851	6.46916	6.66618	12.7779	45.2941	29.6616	17.9089	7.75069	10.8033	14.7173	14.1768
ENSG00000082458	1741	DLG3	discs large MAGUK scaffold protein 3	112.634	99.7967	125.973	119.94	102.683	42.5744	121.763	249.829	82.1462	124.134	162.355	122.44
ENSG00000082482	3776	KCNK2	potassium two pore domain channel subfamily K member 2	23.6828	38.0178	46.4381	33.4343	49.6306	12.9083	22.9721	32.0224	11.8066	31.9319	25.1132	17.0816
ENSG00000082497	56256	SERTAD4	SERTA domain containing 4	79.6789	47.3178	46.4548	15.8645	5.39668	2.48961	4.71368	9.0975	4.97266	8.91465	7.1607	7.49899
ENSG00000082512	7188	TRAF5	TNF receptor associated factor 5	4.38691	5.50384	5.19031	14.8999	9.89062	11.2765	12.508	8.90678	8.47298	7.76211	11.0308	7.94202
ENSG00000082515	29093	MRPL22	mitochondrial ribosomal protein L22	19.1596	20.4724	15.8217	18.4827	14.5297	15.628	13.4719	13.5604	50.8656	17.1856	14.2594	15.7895
ENSG00000082516	25929	GEMIN5	gem nuclear organelle associated protein 5	62.0278	45.9152	45.6661	37.5339	39.6592	17.9294	17.193	20.4646	9.69531	14.8309	21.288	20.6246
ENSG00000082556	4986	OPRK1	opioid receptor kappa 1	2.08666	4.73538	2.57097	7.21739	6.4862	2.69882	8.26448	12.4161	24.0855	28.5398	27.7842	22.9444
ENSG00000082641	4779	NFE2L1	nuclear factor, erythroid 2 like 1	179.311	144.29	170.438	124.418	167.983	214.085	225.297	330.39	129.484	276.333	280.55	282.936
ENSG00000082684	54437	SEMA5B	semaphorin 5B	116.921	118.529	113.443	146.949	117.123	158.1	59.4746	41.2916	15.8625	27.3816	22.2301	27.488
ENSG00000082701	2932	GSK3B	glycogen synthase kinase 3 beta	223.209	189.153	211.121	146.432	191.739	63.9138	113.38	161.447	66.9782	103.242	128.407	96.3217
ENSG00000082781	3693	ITGB5	integrin subunit beta 5	18.1513	41.0067	31.3162	23.168	80.6488	114.041	78.2187	47.4329	37.1422	35.0775	39.6939	43.3586
ENSG00000082805	23085	ERC1	ELKS/RAB6-interacting/CAST family member 1	159.061	190.406	234.073	126.141	176.342	87.6802	124.451	144.473	29.0304	70.438	119.135	75.3247
ENSG00000082898	7514	XPO1	exportin 1	306.138	218.028	239.91	230.629	179.522	141.447	92.4445	104.345	86.98	80.297	114.758	98.7934
ENSG00000082996	11342	RNF13	ring finger protein 13	26.1656	27.5661	22.1912	23.7537	30.308	48.2649	41.7358	58.6474	89.3691	80.582	85.3533	90.8535
ENSG00000083067	80036	TRPM3	transient receptor potential cation channel subfamily M member 3	11.4357	21.7112	26.5875	14.142	11.2863	11.653	24.8773	63.9495	24.0299	55.4157	63.6657	39.1629
ENSG00000083093	79728	PALB2	partner and localizer of BRCA2	11.951	14.3897	12.6768	12.6261	12.2851	7.00856	5.12163	5.47376	5.19491	7.04061	6.43694	7.62837
ENSG00000083097	23033	DOP1A	DOP1 leucine zipper like protein A	31.5792	32.8547	42.0214	45.2853	39.3005	17.9712	25.8547	40.2998	5.86163	20.4118	35.8902	32.3642
ENSG00000083099	57226	LYRM2	LYR motif containing 2	17.4043	15.9128	15.5018	12.1438	15.5721	9.60277	10.0387	15.811	16.2514	13.5454	16.7038	13.2725
ENSG00000083123	594	BCKDHB	branched chain keto acid dehydrogenase E1 subunit beta	12.4076	12.9312	11.3169	9.80118	12.4578	44.3317	19.578	21.876	10.8065	23.5186	18.696	18.3561
ENSG00000083168	7994	KAT6A	lysine acetyltransferase 6A	225.101	151.548	220.711	147.224	155.04	56.5078	76.2639	66.5434	18.0294	45.4405	59.8884	46.411
ENSG00000083223	79670	TUT7	terminal uridylyl transferase 7	30.9274	22.6717	31.5501	32.7108	28.0476	9.30987	12.5394	14.6666	4.86154	10.1013	13.0265	10.9205
ENSG00000083290	9706	ULK2	unc-51 like autophagy activating kinase 2	112.836	118.865	131.597	136.304	161.327	109.564	81.3067	127.422	72.0897	93.2388	90.6528	97.8819
ENSG00000083312	3842	TNPO1	transportin 1	267.822	229.571	221.694	169.721	216.227	80.6925	72.7889	77.6435	33.0307	76.2762	74.4705	60.8063
ENSG00000083444	5351	PLOD1	procollagen-lysine,2-oxoglutarate 5-dioxygenase 1	37.6391	37.4471	34.9133	24.4771	45.9213	219.274	67.5266	52.3154	42.9205	58.6111	56.7573	58.6907
ENSG00000083454	5026	P2RX5	purinergic receptor P2X 5	1.0584	2.30851	1.13487	1.60195	2.20268	3.66119	7.68617	6.42738	8.97302	7.74721	10.1455	9.67231
ENSG00000083457	3682	ITGAE	integrin subunit alpha E	10.3501	10.7765	9.70047	12.695	8.56581	17.3436	11.69	9.05936	53.5325	10.799	12.4912	16.5759
ENSG00000083520	22894	DIS3	DIS3 homolog, exosome endoribonuclease and 3'-5' exoribonuclease	60.1653	56.1086	52.7908	46.9044	47.5013	26.0886	21.226	27.674	26.5301	28.6414	26.7255	26.7386
ENSG00000083535	10464	PIBF1	progesterone immunomodulatory binding factor 1	22.8793	23.0043	23.6873	25.1317	20.2105	14.3728	8.49261	8.22018	7.97293	7.35489	7.79998	6.9263
ENSG00000083544	81550	TDRD3	tudor domain containing 3	37.0418	37.6693	38.481	31.4361	27.6909	17.0088	14.4947	12.2254	11.1399	11.4533	14.4796	11.816
ENSG00000083635	26747	NUFIP1	nuclear FMR1 interacting protein 1	11.3509	11.1564	11.5271	10.1112	10.8496	5.12566	6.44117	7.80058	2.58356	9.74659	8.46803	5.85834
ENSG00000083642	23047	PDS5B	PDS5 cohesin associated factor B	157.335	112.13	120.979	86.2125	89.0728	38.8923	51.6561	105.871	54.866	85.8006	77.4052	60.5905
ENSG00000083720	5019	OXCT1	3-oxoacid CoA-transferase 1	67.6888	66.5366	70.9544	50.0739	69.7619	55.7546	113.571	228.506	143.485	141.668	143.771	152.014
ENSG00000083750	10325	RRAGB	Ras related GTP binding B	39.3612	51.5325	44.1383	44.9752	56.7685	41.6957	34.5951	44.4576	59.2553	46.1982	40.6694	39.272
ENSG00000083799	1540	CYLD	CYLD lysine 63 deubiquitinase	34.9671	41.1685	35.2541	32.1596	35.9028	30.733	67.3021	119.755	52.088	109.751	114.576	87.6419
ENSG00000083807	10998	SLC27A5	solute carrier family 27 member 5	4.66052	6.70594	5.99145	5.49486	6.78236	24.7496	17.8021	12.7212	48.4765	20.2113	13.4508	18.9819
ENSG00000083812	25799	ZNF324	zinc finger protein 324	19.2113	16.828	21.5219	18.7239	17.1798	9.4354	15.2437	19.6636	9.75087	10.148	13.9389	13.199
ENSG00000083814	79891	ZNF671	zinc finger protein 671	33.4338	27.9277	30.8497	36.0525	25.6903	15.9209	12.674	11.9584	15.9181	13.1002	11.9712	11.5018
ENSG00000083817	55659	ZNF416	zinc finger protein 416	12.686	10.0863	9.53949	9.18107	8.44588	3.20092	3.39985	3.71911	4.75042	4.93018	3.66165	3.91425
ENSG00000083828	54807	ZNF586	zinc finger protein 586	14.4315	11.9794	13.6264	15.5544	10.1901	8.01277	4.46585	2.49848	5.69495	4.12704	4.76628	2.52647
ENSG00000083838	55663	ZNF446	zinc finger protein 446	11.7856	15.8976	16.5655	18.3794	17.0082	12.2807	12.5984	10.28	4.75042	7.00537	8.3612	7.79153
ENSG00000083844	9422	ZNF264	zinc finger protein 264	20.8374	11.6968	15.345	11.0414	12.7085	7.71987	6.68883	8.71606	1.80572	5.61294	7.66667	4.32587
ENSG00000083845	6193	RPS5	ribosomal protein S5	954.215	1112.4	791.486	610.688	820.733	1423.57	349.116	218.321	863.216	295.641	175.557	301.13
ENSG00000083857	2195	FAT1	FAT atypical cadherin 1	267.043	142.213	135.351	58.7899	77.3682	98.6847	126.988	103.162	35.4754	67.4989	116.637	74.9358
ENSG00000083896	91746	YTHDC1	YTH domain containing 1	132.356	114.354	135.617	165.759	137.747	69.3115	64.8518	68.9083	50.9768	88.8369	80.7799	71.621
ENSG00000083937	25978	CHMP2B	charged multivesicular body protein 2B	36.458	49.5387	39.4694	34.0888	42.4687	33.3691	32.9787	44.0762	48.3654	46.4782	42.7069	38.6399
ENSG00000084070	64744	SMAP2	small ArfGAP2	101.775	96.6706	89.7189	60.1679	87.8579	90.6091	123.913	219.618	125.595	200.27	187.806	172.541
ENSG00000084072	10450	PPIE	peptidylprolyl isomerase E	36.1867	39.0845	32.0715	30.2648	29.7024	42.3233	26.1403	24.2409	38.5312	21.5829	24.2674	29.7725
ENSG00000084073	10269	ZMPSTE24	zinc metallopeptidase STE24	27.7557	39.9752	31.1916	30.9194	38.7658	23.7872	35.2374	34.7689	45.8652	60.8353	41.3628	38.3235
ENSG00000084090	56910	STARD7	StAR related lipid transfer domain containing 7	216.041	222.653	186.262	160.212	177.182	156.427	167.499	181.626	215.047	205.969	205.839	192.209
ENSG00000084092	84273	NOA1	nitric oxide associated 1	51.505	46.2516	44.7293	46.87	43.3213	27.8878	18.5129	20.1213	17.4738	21.3649	16.2612	17.3666
ENSG00000084093	5978	REST	RE1 silencing transcription factor	26.4339	21.0818	18.5664	15.2444	16.5697	20.7746	12.8288	8.79235	3.80589	10.0605	9.67813	7.93744
ENSG00000084112	54434	SSH1	slingshot protein phosphatase 1	36.2746	44.8721	50.5199	54.0013	54.8483	29.0594	35.5958	49.035	15.418	30.882	47.1682	44.5745
ENSG00000084207	2950	GSTP1	glutathione S-transferase pi 1	240.441	304.239	190.217	173.717	206.98	277.392	172.193	121.662	316.667	172.485	110.027	157.076
ENSG00000084234	334	APLP2	amyloid beta precursor like protein 2	293.009	285.832	300.281	243.858	465.955	601.418	613.324	667.818	327.057	519.678	574.385	535.975
ENSG00000084444	57613	FAM234B	family with sequence similarity 234 member B	66.6943	56.2508	62.8738	39.911	71.3717	60.9849	77.3019	153.399	74.6455	98.8248	116.173	104.239
ENSG00000084453	6579	SLCO1A2	solute carrier organic anion transporter family member 1A2	0.53183	2.84759	2.48085	2.56657	5.30638	6.38092	27.1916	61.699	54.1437	70.8323	113.062	130.809
ENSG00000084463	51729	WBP11	WW domain binding protein 11	127.428	105.744	108.718	85.4891	96.1732	60.8594	67.9618	95.6478	60.0887	107.779	88.1357	83.6991
ENSG00000084623	8668	EIF3I	eukaryotic translation initiation factor 3 subunit I	160.552	134.486	120.572	96.9266	111.018	107.472	75.0665	78.0631	112.26	92.6805	76.349	86.9867
ENSG00000084628	79570	NKAIN1	sodium/potassium transporting ATPase interacting 1	122.501	139.166	140.472	92.4481	111.686	25.2099	20.7295	12.2254	10.2509	9.34226	8.15488	10.6692
ENSG00000084636	1307	COL16A1	collagen type XVI alpha 1 chain	2.32098	2.80147	4.08324	5.18481	7.61192	32.5323	44.6618	36.3709	32.0862	24.0387	34.5396	59.6511
ENSG00000084652	200081	TXLNA	taxilin alpha	61.0609	52.2287	54.7442	66.1967	44.2848	48.5996	55.8664	46.937	29.8082	33.4168	56.5241	49.0432
ENSG00000084674	338	APOB	apolipoprotein B	0	0	0.415166	0	0.69315	0	0.648754	1.69744	0	0	0.669461	0.642293
ENSG00000084676	8648	NCOA1	nuclear receptor coactivator 1	153.223	155.876	233.666	186.188	207.612	101.279	130.851	169.687	53.1436	120.789	168.993	142.998
ENSG00000084693	60509	AGBL5	ATP/GTP binding protein like 5	60.1299	53.581	48.939	50.0739	47.5572	30.6912	31.5913	22.3337	29.586	28.4201	25.4398	27.7329
ENSG00000084710	22979	EFR3B	EFR3 homolog B	77.3894	58.2093	87.1987	53.4156	69.2435	35.6704	60.6287	129.787	10.751	43.7026	85.1221	57.0676
ENSG00000084731	3797	KIF3C	kinesin family member 3C	608.056	533.419	696.427	575.617	624.32	133.958	326.529	734.838	224.048	465.88	446.55	414.401
ENSG00000084733	10890	RAB10	RAB10, member RAS oncogene family	271.387	290.127	257.467	189.564	279.32	180.151	134.251	151.225	134.095	241.166	152.865	140.785
ENSG00000084734	2646	GCKR	glucokinase regulator	0	0	0	0.465083	0	1.15066	0.710771	0	0.527825	0	0	0.519456
ENSG00000084754	3030	HADHA	hydroxyacyl-CoA dehydrogenase trifunctional multienzyme complex subunit alpha	209.863	188.354	186.598	199.486	194.073	197.725	126.57	106.366	140.763	145.161	132.997	142.251
ENSG00000084764	22924	MAPRE3	microtubule associated protein RP/EB family member 3	112.921	137.308	130.841	95.4108	125.695	111.949	238.246	300.561	344.447	363.703	322.832	291.525
ENSG00000084774	790	CAD	carbamoyl-phosphate synthetase 2, aspartate transcarbamylase, and dihydroorotase	87.2917	51.476	67.4353	46.491	41.9346	31.1096	33.8073	22.7533	10.8065	13.6603	21.4981	25.0758
ENSG00000085063	966	CD59	CD59 molecule (CD59 blood group)	120.754	103.138	84.0242	64.1297	103.092	291.535	159.54	167.703	352.893	304.327	244.501	262.462
ENSG00000085117	3732	CD82	CD82 molecule	29.9496	31.247	20.3592	13.9353	31.7985	52.5746	39.2778	38.507	33.1418	34.1757	39.7471	33.0036
ENSG00000085185	63035	BCORL1	BCL6 corepressor like 1	52.7146	41.7822	61.8999	50.9352	53.4085	22.4901	21.8986	21.3419	6.13944	17.2815	19.5883	14.6127
ENSG00000085224	546	ATRX	ATRX chromatin remodeler	235.978	227.225	290.747	206.652	251.722	68.1399	140.588	204.742	80.4238	113.501	171.118	103.869
ENSG00000085231	102157402	AK6	adenylate kinase 6	57.6127	64.5663	60.1148	60.7191	62.4927	63.4117	43.0117	50.7515	109.315	70.6923	54.9299	61.8518
ENSG00000085265	2219	FCN1	ficolin 1	0	0	0	0	0	0.606711	0.438665	0	0	0	0	0
ENSG00000085274	55892	MYNN	myoneurin	28.9683	28.3966	24.3382	20.3775	22.2976	14.6657	10.008	11.5006	16.2514	12.333	11.5869	10.7868
ENSG00000085276	2122	MECOM	MDS1 and EVI1 complex locus	5.73336	3.82483	3.41025	2.32541	5.63232	26.2141	7.45141	4.63458	2.30576	3.23897	3.01914	4.34761
ENSG00000085365	9522	SCAMP1	secretory carrier membrane protein 1	151.271	169.921	149.886	86.1436	126.024	69.5207	100.006	154.581	108.537	179.553	128.764	106.121
ENSG00000085377	5550	PREP	prolyl endopeptidase	62.5435	58.3129	61.1581	48.4203	51.5022	44.7502	30.0156	45.4112	29.5304	33.6049	34.2556	30.2512
ENSG00000085382	57531	HACE1	HECT domain and ankyrin repeat containing E3 ubiquitin protein ligase 1	28.5764	22.3299	25.1098	29.6103	24.8477	18.1386	19.9998	29.1235	16.6404	30.1501	28.7779	28.6483
ENSG00000085415	81929	SEH1L	SEH1 like nucleoporin	37.6793	35.9954	40.7382	33.9166	43.8196	18.1804	31.4958	66.1238	50.4212	71.4444	59.8784	50.7652
ENSG00000085433	22911	WDR47	WD repeat domain 47	276.451	273.542	330.44	251.093	348.356	71.2781	110.591	247.349	146.596	177.957	170.17	164.657
ENSG00000085449	57590	WDFY1	WD repeat and FYVE domain containing 1	76.0957	61.4897	53.0914	42.5981	54.7028	58.9765	46.5749	51.2855	33.0307	48.5922	43.485	39.2877
ENSG00000085465	5016	OVGP1	oviductal glycoprotein 1	0.428691	0.636541	0.679653	1.05074	0.950352	3.82855	3.36545	1.12527	2.528	1.43261	2.12323	3.32937
ENSG00000085491	29957	SLC25A24	solute carrier family 25 member 24	38.6577	28.8452	23.2384	19.344	16.3146	8.55671	7.67893	7.64801	3.75033	6.52115	5.76586	4.78462
ENSG00000085511	4216	MAP3K4	mitogen-activated protein kinase kinase kinase 4	25.6959	27.9844	36.2192	43.8383	35.5048	14.6238	27.0657	35.0359	14.1957	24.1748	32.02	32.6375
ENSG00000085514	29992	PILRA	paired immunoglobin like type 2 receptor alpha	0	0.445422	0.997819	2.32541	1.87981	3.70303	1.70193	1.583	2.528	0.991985	1.61781	2.79458
ENSG00000085552	57549	IGSF9	immunoglobulin superfamily member 9	50.7352	50.7597	53.1637	43.1838	36.3068	4.33066	2.61406	0.705676	0	0	0.419414	0.616351
ENSG00000085563	5243	ABCB1	ATP binding cassette subfamily B member 1	5.31939	5.14208	4.41333	4.358	14.0487	57.5957	41.3359	33.5482	11.751	13.6611	22.549	26.8678
ENSG00000085644	7760	ZNF213	zinc finger protein 213	29.0212	43.5605	39.0518	45.2853	49.858	56.0475	40.1902	36.2565	28.0858	36.5644	28.8694	37.2091
ENSG00000085662	231	AKR1B1	aldo-keto reductase family 1 member B	120.773	119.457	96.0633	79.6669	104.333	74.1652	84.4008	100.568	153.986	113.761	99.9202	112.897
ENSG00000085719	8895	CPNE3	copine 3	110.179	116.648	99.3758	73.1213	112.395	108.267	57.209	56.5113	49.5877	80.889	62.9771	47.3562
ENSG00000085721	54700	RRN3	RRN3 homolog, RNA polymerase I transcription factor	80.1093	80.2444	83.5736	75.6362	80.2851	32.3649	27.484	24.9275	17.9738	26.4382	34.6378	31.5088
ENSG00000085733	2017	CTTN	cortactin	86.9564	94.8675	101.113	139.06	129.765	115.296	124.348	114.796	92.7583	93.157	136.917	141.092
ENSG00000085741	7481	WNT11	Wnt family member 11	0.562554	0.495665	1.15815	0.94739	2.40823	3.41013	2.0168	0.743821	1.58347	1.0888	0.661523	1.08809
ENSG00000085760	4528	MTIF2	mitochondrial translational initiation factor 2	17.14	12.7321	14.8764	16.1056	13.5487	10.9417	12.7494	16.5739	11.9177	19.4476	17.7185	18.2038
ENSG00000085788	23259	DDHD2	DDHD domain containing 2	50.5516	53.8624	58.2418	71.571	73.9341	60.8594	81.3636	149.394	76.3679	126.879	128.829	117.878
ENSG00000085831	22996	TTC39A	tetratricopeptide repeat domain 39A	1.15775	0.801197	0.942479	0.878489	0.837945	1.15066	2.86322	3.3758	4.0837	4.0306	4.88982	5.91963
ENSG00000085832	2060	EPS15	epidermal growth factor receptor pathway substrate 15	125.573	116.471	106.893	65.8178	112.797	137.389	143.171	284.311	168.932	240.332	234.602	190.608
ENSG00000085840	4998	ORC1	origin recognition complex subunit 1	20.2288	9.84958	9.02725	8.18201	2.92767	1.69461	0	0	0	0	0	0
ENSG00000085871	4258	MGST2	microsomal glutathione S-transferase 2	3.39444	4.19693	2.43211	2.80772	4.92026	24.917	8.08975	5.5119	18.2516	9.58285	5.81244	7.30857
ENSG00000085872	10523	CHERP	calcium homeostasis endoplasmic reticulum protein	55.5683	63.5619	75.6662	71.0198	72.1515	43.1602	43.9122	45.6401	15.2514	30.1142	32.576	31.8204
ENSG00000085978	55054	ATG16L1	autophagy related 16 like 1	33.2727	38.1824	38.7596	37.6028	31.9104	20.5236	28.6191	43.6566	33.3641	32.5826	33.9546	36.5986
ENSG00000085982	55230	USP40	ubiquitin specific peptidase 40	15.6735	17.083	15.8144	23.0646	16.3747	26.507	22.9493	16.1161	12.6956	16.1906	20.7956	24.7677
ENSG00000085998	55624	POMGNT1	protein O-linked mannose N-acetylglucosaminyltransferase 1 (beta 1,2-)	70.2726	84.5319	73.4709	85.868	96.4609	93.4125	104.731	102.972	161.709	98.9294	92.5262	118.048
ENSG00000085999	8438	RAD54L	RAD54 like	18.1444	12.0068	9.8141	11.3859	4.27463	1.9875	2.92342	2.04074	1.63903	2.01505	2.59772	2.91229
ENSG00000086015	23139	MAST2	microtubule associated serine/threonine kinase 2	129.64	160.886	190.045	193.664	193.171	113.413	96.495	92.8632	50.699	69.121	73.7571	76.3085
ENSG00000086061	3301	DNAJA1	DnaJ heat shock protein family (Hsp40) member A1	541.61	491.521	454.226	328.779	334.507	105.756	203.661	312.081	290.387	363.217	275.657	265.764
ENSG00000086062	2683	B4GALT1	beta-1,4-galactosyltransferase 1	10.3222	9.74619	7.70655	8.07866	8.97476	31.6954	13.4322	7.64801	6.08387	7.45476	5.4045	6.07615
ENSG00000086065	51510	CHMP5	charged multivesicular body protein 5	109.726	106.075	96.0857	98.9248	94.6537	89.1028	62.6808	86.5312	223.659	119.382	80.3441	90.4401
ENSG00000086102	4799	NFX1	nuclear transcription factor, X-box binding 1	46.9227	41.524	51.374	50.1083	49.8406	28.2225	26.3318	33.8915	13.8068	25.5301	29.8698	31.9783
ENSG00000086159	363	AQP6	aquaporin 6	0	0	0	0.499533	0.434237	0.857764	4.0707	1.54486	3.08361	1.40149	1.47476	1.59736
ENSG00000086189	27292	DIMT1	DIMT1 rRNA methyltransferase and ribosome maturation factor	42.3646	52.6451	50.0396	67.2992	58.571	26.9673	33.1755	33.3957	48.3099	36.1655	37.1494	33.8758
ENSG00000086200	51194	IPO11	importin 11	39.3814	30.0202	30.7406	25.2695	23.2512	16.967	15.718	27.1018	28.8081	24.3535	21.1301	21.4436
ENSG00000086205	2346	FOLH1	folate hydrolase 1	5.13799	3.46958	2.02883	1.32635	1.99718	1.77829	1.49547	18.71	26.6968	29.9406	29.7869	35.8734
ENSG00000086232	27102	EIF2AK1	eukaryotic translation initiation factor 2 alpha kinase 1	146.123	130.801	140.239	107.227	132.888	128.058	103.348	113.309	88.4801	136.576	121.54	117.485
ENSG00000086289	54749	EPDR1	ependymin related 1	7.67783	10.4372	9.30583	9.45668	14.1864	22.6575	32.773	80.2373	69.0895	95.1992	89.7823	70.4376
ENSG00000086300	29887	SNX10	sorting nexin 10	16.5095	20.8057	15.1586	11.2826	18.8478	25.2517	49.1865	103.2	116.149	121.224	88.4888	83.7715
ENSG00000086475	22929	SEPHS1	selenophosphate synthetase 1	162.626	124.595	104.039	95.1352	77.3758	61.9054	62.4955	47.2803	66.367	38.933	42.4936	44.2336
ENSG00000086504	10573	MRPL28	mitochondrial ribosomal protein L28	56.4154	71.9907	50.2644	48.3514	50.7464	77.6799	95.1449	113.995	183.377	106.305	86.7774	86.3539
ENSG00000086506	3049	HBQ1	hemoglobin subunit theta 1	1.66104	2.33484	1.27697	1.46415	1.85996	23.2015	5.65451	5.28304	23.3076	4.15061	3.26836	4.6379
ENSG00000086544	80271	ITPKC	inositol-trisphosphate 3-kinase C	17.5098	19.5053	18.5774	16.5535	17.8588	23.8291	14.6007	15.3151	10.9732	8.27383	11.2723	10.1183
ENSG00000086570	2196	FAT2	FAT atypical cadherin 2	1.13459	1.3389	3.42363	2.87662	1.84701	0.774079	2.67326	4.25313	14.8069	1.06524	14.6241	2.73528
ENSG00000086589	55696	RBM22	RNA binding motif protein 22	100.457	97.533	81.0804	70.5031	81.0387	59.3112	45.0799	39.804	55.1994	56.1014	43.0238	44.9408
ENSG00000086598	10959	TMED2	transmembrane p24 trafficking protein 2	135.454	167.308	121.009	115.048	122.933	91.3623	72.4434	81.5342	110.038	153.735	93.1794	82.9872
ENSG00000086619	56605	ERO1B	endoplasmic reticulum oxidoreductase 1 beta	10.9728	12.9239	10.5201	21.0321	13.3429	12.0715	15.1647	13.7512	18.3627	19.2614	17.3073	16.6899
ENSG00000086666	54469	ZFAND6	zinc finger AN1-type containing 6	69.1768	69.5123	52.606	45.9398	46.103	63.3699	35.2893	39.1174	61.1999	48.4671	34.405	34.0444
ENSG00000086712	55787	TXLNG	taxilin gamma	25.1147	23.4517	22.335	29.438	21.3965	13.3686	12.3812	13.9037	7.13952	18.4555	17.2461	16.5232
ENSG00000086717	5475	PPEF1	protein phosphatase with EF-hand domain 1	0.838666	0.824432	2.71096	6.59728	3.17947	1.9875	5.90363	13.9037	14.1957	6.63883	5.20101	7.34245
ENSG00000086730	7462	LAT2	linker for activation of T cells family member 2	0.830769	1.54243	1.42946	2.63547	3.08442	10.4396	4.18042	5.81706	7.97293	5.41639	3.02339	4.92484
ENSG00000086758	10075	HUWE1	HECT, UBA and WWE domain containing E3 ubiquitin protein ligase 1	462.581	315.836	511.288	319.615	345.348	142.075	252.589	357.702	81.924	273.772	307.357	293.337
ENSG00000086827	9183	ZW10	zw10 kinetochore protein	26.8235	20.7135	18.7997	15.9678	14.7283	7.5525	7.93916	10.2037	7.69513	10.5012	9.51313	10.4462
ENSG00000086848	79796	ALG9	ALG9 alpha-1,2-mannosyltransferase	15.47	16.6901	16.0738	18.0693	16.8315	9.01698	8.42732	8.02945	9.36194	8.96048	11.059	9.38685
ENSG00000086967	4606	MYBPC2	myosin binding protein C, fast type	0	0	0	0	0	0.815921	0.400438	0.553098	1.30567	0.493338	0.464534	0.435866
ENSG00000086991	50507	NOX4	NADPH oxidase 4	3.44513	1.72172	1.27685	1.73975	1.28081	5.54408	0.405799	0.400519	0	0	0	0
ENSG00000087008	8310	ACOX3	acyl-CoA oxidase 3, pristanoyl	17.1	18.1191	19.8123	18.7583	20.9273	22.8667	15.5366	16.4213	12.14	10.5009	16.5304	13.7913
ENSG00000087053	8898	MTMR2	myotubularin related protein 2	69.1742	59.9213	58.4382	47.0767	52.277	26.1722	28.7592	49.569	30.4749	50.9853	44.315	43.6289
ENSG00000087074	23645	PPP1R15A	protein phosphatase 1 regulatory subunit 15A	87.4547	81.6783	88.0852	112.808	89.4345	73.0773	47.45	41.0627	28.6414	59.7372	32.2123	31.7103
ENSG00000087076	51171	HSD17B14	hydroxysteroid 17-beta dehydrogenase 14	1.917	2.47226	2.74865	4.4269	6.33075	56.4659	18.6283	13.0264	36.1421	14.5045	11.249	17.2099
ENSG00000087077	7205	TRIP6	thyroid hormone receptor interactor 6	21.7007	18.8505	14.9109	14.2109	14.4569	55.5873	28.6381	17.0316	28.6414	18.1129	17.227	23.6943
ENSG00000087085	43	ACHE	acetylcholinesterase (Cartwright blood group)	10.8219	14.0153	13.0129	7.493	11.6753	30.0636	43.5211	42.3978	42.0871	52.0535	46.7052	49.0503
ENSG00000087086	2512	FTL	ferritin light chain	594.944	785.663	473.749	501.101	793.532	3815.14	1155.2	738.271	3305.16	1941.44	943.03	1385.79
ENSG00000087087	51593	SRRT	serrate, RNA effector molecule	130.55	126.723	151.297	169.135	114.431	60.6502	73.1728	68.031	49.9211	57.3772	64.5322	69.3069
ENSG00000087088	581	BAX	BCL2 associated X, apoptosis regulator	23.8027	28.9371	29.9849	21.101	22.951	31.3607	19.648	16.7646	23.1409	11.777	13.2637	14.0579
ENSG00000087095	51701	NLK	nemo like kinase	82.6949	63.0007	59.2023	37.4305	47.2431	24.1638	54.4509	129.101	83.313	115.166	112.854	100.659
ENSG00000087111	94005	PIGS	phosphatidylinositol glycan anchor biosynthesis class S	45.3044	38.1196	34.4077	28.2667	38.118	48.3486	49.6299	51.1711	26.419	52.3941	44.4816	51.4901
ENSG00000087116	9509	ADAMTS2	ADAM metallopeptidase with thrombospondin type 1 motif 2	5.44134	6.07225	4.22867	2.39431	4.01572	29.6033	9.71684	5.01602	0.916748	1.77608	2.79458	2.83447
ENSG00000087152	56970	ATXN7L3	ataxin 7 like 3	188.289	172.102	175.973	145.881	137.027	117.053	197.986	250.744	216.603	271.187	234.77	219.466
ENSG00000087157	9489	PGS1	phosphatidylglycerophosphate synthase 1	27.5867	27.0242	31.9413	34.0888	26.9238	28.1388	27.1759	30.7637	25.53	28.4436	29.2089	33.8238
ENSG00000087191	5705	PSMC5	proteasome 26S subunit, ATPase 5	107.243	90.6452	103.583	80.287	84.5282	76.7175	102.044	106.71	157.931	143.013	138.069	144.961
ENSG00000087206	51720	UIMC1	ubiquitin interaction motif containing 1	38.0535	31.0406	38.5253	34.4678	30.2285	16.1301	12.5392	9.93669	12.1955	8.2139	10.3118	11.3344
ENSG00000087237	1071	CETP	cholesteryl ester transfer protein	1.8591	1.10638	0.822611	0.533984	2.29115	3.0754	5.05233	2.87992	2.13908	0.412356	1.34525	0.98766
ENSG00000087245	4313	MMP2	matrix metallopeptidase 2	21.0364	23.4471	17.3505	46.7666	53.318	68.642	73.5582	21.9904	8.8619	11.9744	7.68344	6.3248
ENSG00000087250	4504	MT3	metallothionein 3	48.6557	75.8156	35.107	31.8151	94.938	1900.36	784.862	378.872	2383.68	739.144	602.58	831.842
ENSG00000087253	54947	LPCAT2	lysophosphatidylcholine acyltransferase 2	3.68034	4.24181	3.25849	2.46321	5.96083	10.3978	9.56683	11.3099	6.195	13.7247	9.38437	9.48581
ENSG00000087258	2775	GNAO1	G protein subunit alpha o1	522.23	456.969	551.528	390.687	628.019	406.894	720.525	697.571	479.959	736.725	818.921	670.269
ENSG00000087263	55239	OGFOD1	2-oxoglutarate and iron dependent oxygenase domain containing 1	30.271	25.9548	28.9569	25.8207	29.5928	17.3854	17.877	21.9523	22.1964	29.0758	25.6516	23.5753
ENSG00000087266	6452	SH3BP2	SH3 domain binding protein 2	53.3321	65.3139	87.4566	112.223	88.5098	79.3536	45.9112	21.9141	16.2514	15.948	18.1031	19.6335
ENSG00000087269	8602	NOP14	NOP14 nucleolar protein	16.8997	13.7455	20.1504	19.8607	17.7437	8.26382	9.20628	11.5006	6.69504	10.0211	10.3455	10.2316
ENSG00000087274	118	ADD1	adducin 1	454.053	432.292	444.262	425.516	545.457	491.917	378.085	424.493	271.552	441.573	442.433	428.423
ENSG00000087299	79944	L2HGDH	L-2-hydroxyglutarate dehydrogenase	6.53671	4.71561	6.15483	4.94366	5.71837	4.6654	3.47614	7.41914	2.41688	4.36731	4.84796	4.04825
ENSG00000087301	57544	TXNDC16	thioredoxin domain containing 16	39.6712	42.5692	38.6287	28.5767	41.8507	27.553	16.5484	24.1265	14.918	23.0845	17.365	18.4212
ENSG00000087302	51637	RTRAF	RNA transcription, translation and transport factor	103.735	86.5581	81.7461	80.3215	73.4458	56.3404	39.8366	40.9483	89.5913	38.0852	46.5803	48.5214
ENSG00000087303	22795	NID2	nidogen 2	10.4084	7.60502	7.71877	7.493	14.4844	52.1562	24.804	10.6614	3.30585	3.63435	5.63859	5.39779
ENSG00000087338	64395	GMCL1	germ cell-less 1, spermatogenesis associated	14.5469	19.4944	16.9922	24.6149	17.6539	10.3978	10.8386	12.4542	9.47307	9.98654	12.4607	11.7776
ENSG00000087365	10992	SF3B2	splicing factor 3b subunit 2	346.674	287.728	302.41	273.176	266.818	212.244	189.245	200.24	122.428	183.031	181.602	182.375
ENSG00000087448	57542	KLHL42	kelch like family member 42	72.321	74.6361	54.7853	53.9668	57.8726	35.503	52.8066	72.7991	54.0881	71.2848	67.0543	62.9108
ENSG00000087460	2778	GNAS	GNAS complex locus	2126.79	1900.64	2114.32	1935.24	2526.49	2568.29	2222.42	1800.91	1863.47	1791.45	2028.24	1964.52
ENSG00000087470	10059	DNM1L	dynamin 1 like	130.329	124.844	149.392	121.214	141.872	71.9057	102.836	179.642	149.874	157.333	154.911	144.844
ENSG00000087494	5744	PTHLH	parathyroid hormone like hormone	0	0	0	0	0	1.65276	5.04386	6.73253	7.25065	10.5672	4.69601	6.09168
ENSG00000087495	116154	PHACTR3	phosphatase and actin regulator 3	99.2079	81.1702	105.811	94.8252	84.8335	130.945	116.454	105.947	104.426	147.593	125.126	111.808
ENSG00000087502	51290	ERGIC2	ERGIC and golgi 2	29.721	28.7937	24.828	24.2704	24.3519	19.7286	21.4614	26.0337	29.586	23.6174	28.6959	24.8276
ENSG00000087510	7022	TFAP2C	transcription factor AP-2 gamma	28.7849	44.7152	33.899	15.141	29.1292	3.20092	1.72277	1.35414	1.08343	2.04879	1.6633	1.07403
ENSG00000087586	6790	AURKA	aurora kinase A	29.7355	16.1455	13.9592	14.2109	4.81182	3.24276	2.01358	1.73558	1.6946	1.87911	1.78677	1.76806
ENSG00000087589	57091	CASS4	Cas scaffold protein family member 4	0	0	0	0	0	3.36829	1.4406	1.12527	0	0.44262	0.761925	0.688741
ENSG00000087842	8544	PIR	pirin	2.98166	2.88733	2.22216	2.80772	2.76652	7.0504	4.42908	5.9315	16.8071	14.8393	12.5821	13.9855
ENSG00000087884	28971	AAMDC	adipogenesis associated Mth938 domain containing	2.97551	2.24175	2.26464	2.87662	1.97471	4.87461	2.75523	2.23146	7.91737	1.74199	2.62198	2.541
ENSG00000087903	5990	RFX2	regulatory factor X2	20.5459	16.8034	14.3477	12.9362	11.7204	31.1933	20.2092	15.2007	7.0284	7.28569	11.251	10.9652
ENSG00000087995	339175	METTL2A	methyltransferase like 2A	16.6935	15.3861	17.3079	15.5889	16.7371	9.47724	8.79029	11.2717	13.0845	7.9921	8.87086	7.46204
ENSG00000088002	6820	SULT2B1	sulfotransferase family 2B member 1	0	0	0	0	0	0.481184	0.410452	0	1.13899	0	0.790761	0.440452
ENSG00000088035	29929	ALG6	ALG6 alpha-1,3-glucosyltransferase	5.68623	8.99084	7.07208	10.0423	7.48608	6.33908	6.24979	4.482	7.97293	5.89057	5.90568	5.65042
ENSG00000088038	4849	CNOT3	CCR4-NOT transcription complex subunit 3	46.7521	49.8067	60.1331	55.0003	58.9243	36.2562	37.6033	38.3926	14.029	26.4642	31.4236	31.9087
ENSG00000088053	51206	GP6	glycoprotein VI platelet	0	0	0	0	0	0.648553	0.459993	0	0	0.433257	0.437593	0
ENSG00000088179	5775	PTPN4	protein tyrosine phosphatase non-receptor type 4	38.9653	58.5974	60.3489	49.626	60.7849	19.4357	47.761	85.692	26.3635	51.8131	56.7965	43.5301
ENSG00000088205	8886	DDX18	DEAD-box helicase 18	79.8971	73.5262	69.1577	64.8532	69.1947	43.5367	35.1036	40.7957	27.8636	39.0703	41.8139	40.0048
ENSG00000088247	8570	KHSRP	KH-type splicing regulatory protein	256.879	212.063	265.33	201.036	215.727	163.875	154.183	130.665	58.3107	111.851	108.226	96.6685
ENSG00000088256	2767	GNA11	G protein subunit alpha 11	76.9014	103.593	92.3152	93.9294	97.4305	102.158	118.521	106.786	69.4784	94.0872	85.5248	76.6738
ENSG00000088280	55616	ASAP3	ArfGAP with SH3 domain, ankyrin repeat and PH domain 3	30.3369	16.4386	19.85	30.5749	22.811	46.2983	25.3654	17.3749	12.9178	15.4851	18.0782	22.1491
ENSG00000088298	55741	EDEM2	ER degradation enhancing alpha-mannosidase like protein 2	12.9047	13.7389	12.1482	11.4548	12.1877	21.1094	10.9262	11.1573	17.9183	9.64735	9.71142	11.5374
ENSG00000088305	1789	DNMT3B	DNA methyltransferase 3 beta	14.4092	13.4163	11.9095	21.1354	11.552	3.15908	2.7498	1.08712	1.6946	0.564823	1.00057	1.14534
ENSG00000088320	28954	REM1	RRAD and GEM like GTPase 1	0	0	0	0	0	3.24276	1.05968	0.591242	1.30567	0.505078	0	0.896882
ENSG00000088325	22974	TPX2	TPX2 microtubule nucleation factor	231.451	102.415	100.653	82.423	27.9139	11.4857	7.99046	5.24489	3.08361	4.43207	5.02954	3.58436
ENSG00000088340	80307	FER1L4	fer-1 like family member 4 (pseudogene)	0	0	0	1.39525	0	12.0715	1.21677	0.553098	0.638946	1.07851	0.75267	0.964691
ENSG00000088356	81572	PDRG1	p53 and DNA damage regulated 1	42.4676	49.1744	40.7502	32.9864	39.5916	32.6996	23.6963	27.4832	54.3659	22.9511	23.3308	24.87
ENSG00000088367	2036	EPB41L1	erythrocyte membrane protein band 4.1 like 1	149.347	157.143	193.572	128.173	170.08	116.886	302.687	504.482	210.713	464.25	517.92	428.087
ENSG00000088387	23348	DOCK9	dedicator of cytokinesis 9	28.1065	39.2406	66.3058	85.3168	60.7038	100.651	119.411	220.724	54.0881	116.102	145.94	140.947
ENSG00000088448	55608	ANKRD10	ankyrin repeat domain 10	48.318	57.0052	63.2138	118.114	54.7542	52.9931	42.8153	25.9956	29.5304	28.8593	35.7327	42.8683
ENSG00000088451	23483	TGDS	TDP-glucose 4,6-dehydratase	4.86552	3.69609	3.82967	4.59915	3.34704	6.2554	3.16873	3.29951	4.6393	3.5624	4.3492	4.46466
ENSG00000088538	1795	DOCK3	dedicator of cytokinesis 3	73.1219	84.1219	108.469	81.5961	101.607	53.2859	130.845	286.371	98.0921	147.251	187.813	185.302
ENSG00000088543	51161	C3orf18	chromosome 3 open reading frame 18	18.2854	22.4144	22.7681	21.2732	23.3218	38.3483	37.5863	30.3441	43.4761	27.2052	31.7325	39.2161
ENSG00000088682	57017	COQ9	coenzyme Q9	25.9173	25.2667	23.0829	26.303	27.2851	41.068	41.1758	33.5101	49.5877	37.6031	34.4715	39.2034
ENSG00000088727	64147	KIF9	kinesin family member 9	4.19431	5.05064	4.22519	2.97997	3.9911	8.76593	8.58676	7.26656	12.4178	8.02594	6.54804	6.29441
ENSG00000088756	79822	ARHGAP28	Rho GTPase activating protein 28	11.3911	11.0098	8.79393	15.2788	15.3451	2.57329	1.93578	2.07888	0.527825	1.08846	1.77359	1.67172
ENSG00000088766	54675	CRLS1	cardiolipin synthase 1	41.8866	57.28	40.1245	50.2806	37.7949	48.4741	31.932	27.6358	42.2538	28.5818	26.4132	27.3989
ENSG00000088808	23368	PPP1R13B	protein phosphatase 1 regulatory subunit 13B	21.0513	27.7135	35.3733	26.0274	35.8398	42.4907	53.0177	66.696	34.9753	61.002	62.935	54.6939
ENSG00000088812	8455	ATRN	attractin	120.957	116.551	142.614	96.4443	133.624	79.4791	130.36	212.904	61.6999	125.2	159.034	144.542
ENSG00000088826	54498	SMOX	spermine oxidase	37.1018	32.2314	31.5929	34.6056	32.4398	163.958	88.0555	47.1659	55.0882	59.4455	60.0088	66.1843
ENSG00000088827	6614	SIGLEC1	sialic acid binding Ig like lectin 1	0	0	0	0	0	2.48961	5.19523	4.29128	0.972309	2.07989	1.13471	1.85752
ENSG00000088832	2280	FKBP1A	FKBP prolyl isomerase 1A	118.888	139.455	114.481	86.6604	120.723	201.365	198.984	246.319	424.732	419.355	362.159	291.946
ENSG00000088833	55968	NSFL1C	NSFL1 cofactor	123.321	127.874	112.786	102.025	119.458	85.1696	85.0191	95.8766	151.93	138.751	106.521	109.882
ENSG00000088836	83959	SLC4A11	solute carrier family 4 member 11	0	0	0	0	0	0.564869	1.44876	1.27785	1.13899	3.63037	4.90391	5.38147
ENSG00000088854	25943	C20orf194	chromosome 20 open reading frame 194	80.3011	84.8724	98.9387	113.635	125.855	82.6591	92.0461	95.3426	50.2545	76.9245	113.407	118.405
ENSG00000088876	79175	ZNF343	zinc finger protein 343	6.25186	5.07463	7.87347	11.7993	6.51673	5.12566	5.36803	4.44385	3.19473	4.77331	6.08529	5.46574
ENSG00000088881	57593	EBF4	EBF family member 4	35.5591	39.2859	45.1596	62.8206	56.6418	84.8349	63.5447	27.7502	29.586	20.0116	20.1429	27.7445
ENSG00000088882	56265	CPXM1	carboxypeptidase X, M14 family member 1	31.8707	25.947	27.7123	36.7071	32.8398	24.2057	16.8955	3.87168	1.80572	1.7937	1.63428	1.53378
ENSG00000088888	57506	MAVS	mitochondrial antiviral signaling protein	12.2106	9.78837	19.2347	21.8244	19.1013	24.0383	16.9413	14.8955	6.41724	9.81817	14.5452	11.6145
ENSG00000088899	9762	LZTS3	leucine zipper tumor suppressor family member 3	35.7529	44.5606	47.7636	40.7378	49.9679	119.145	161.573	216.376	152.264	223.843	199.74	249.683
ENSG00000088930	22803	XRN2	5'-3' exoribonuclease 2	166.37	121.201	135.183	106.78	109.928	39.8965	34.731	36.7142	26.7524	28.327	34.1361	31.1291
ENSG00000088970	55857	KIZ	kizuna centrosomal protein	9.06701	8.71814	10.2874	21.5833	15.2566	16.6322	12.9031	15.811	18.0849	19.9804	18.9136	20.8542
ENSG00000088986	8655	DYNLL1	dynein light chain LC8-type 1	250.035	299.083	245.814	215.54	247.331	262.873	280.458	340.079	873.939	546.548	349.438	391.622
ENSG00000088992	54997	TESC	tescalcin	3.33066	2.88772	2.63774	2.32541	3.26423	45.043	19.8656	34.2348	60.0887	26.9094	33.4094	31.4757
ENSG00000089006	27131	SNX5	sorting nexin 5	45.7223	47.3021	43.5954	54.6214	56.7031	71.8639	56.5386	43.5421	74.5344	61.0511	53.793	58.7542
ENSG00000089009	6128	RPL6	ribosomal protein L6	784.472	694.833	545.93	777.911	526.937	550.078	214.987	161.409	450.123	239.576	176.618	202.532
ENSG00000089022	8550	MAPKAPK5	MAPK activated protein kinase 5	29.9404	28.8867	32.38	32.952	29.6704	20.8165	18.4824	26.4152	22.0853	20.2632	23.9177	23.3884
ENSG00000089041	5027	P2RX7	purinergic receptor P2X 7	0.545812	0.517875	0.848182	2.32541	1.78672	5.08382	6.29901	9.32637	3.02805	8.30384	12.8514	12.1057
ENSG00000089048	51575	ESF1	ESF1 nucleolar pre-rRNA processing protein homolog	20.919	15.4851	21.8862	28.9901	20.2437	11.8622	13.9423	17.146	10.5843	13.1178	18.5527	13.7434
ENSG00000089050	10741	RBBP9	RB binding protein 9, serine hydrolase	24.8978	24.3674	20.3515	19.5851	25.1907	18.1386	12.1966	8.86864	13.7512	12.5191	11.13	12.0252
ENSG00000089053	51433	ANAPC5	anaphase promoting complex subunit 5	140.671	143.071	131.069	133.341	132.398	85.6718	88.0312	123.188	153.319	112.131	134.363	159.44
ENSG00000089057	9962	SLC23A2	solute carrier family 23 member 2	100.024	101.946	114.781	88.7963	121.087	129.397	236.128	270.121	64.5335	172.671	214.283	194.902
ENSG00000089060	80024	SLC8B1	solute carrier family 8 member B1	3.43202	4.26144	4.16643	7.25184	6.92531	30.3565	13.4495	9.21194	7.97293	7.79514	11.2968	12.1481
ENSG00000089063	29058	TMEM230	transmembrane protein 230	49.2177	63.0093	45.4897	45.0786	49.315	63.4536	58.1521	64.4073	185.433	116.511	84.8733	92.0313
ENSG00000089091	55184	DZANK1	double zinc ribbon and ankyrin repeat domains 1	6.45825	7.57128	8.83557	7.66525	8.43744	5.58592	5.94824	7.64801	3.58365	5.26667	5.56492	5.88263
ENSG00000089094	84678	KDM2B	lysine demethylase 2B	97.2544	101.45	115.193	118.872	106.952	45.0849	38.9398	36.4854	24.141	29.0317	30.7331	28.5619
ENSG00000089101	26074	CFAP61	cilia and flagella associated protein 61	2.18767	1.62063	1.45489	0.91294	1.86126	2.90803	5.39713	5.66448	1.52791	3.09737	3.01212	2.57592
ENSG00000089116	64211	LHX5	LIM homeobox 5	4.75241	0.681581	1.01129	0	0	0	0	0	0	0	0	0
ENSG00000089123	55617	TASP1	taspase 1	5.08577	5.77385	7.0284	6.76953	6.83163	7.51066	10.0329	16.0398	11.251	8.72183	10.225	9.96614
ENSG00000089127	4938	OAS1	2'-5'-oligoadenylate synthetase 1	0	0.453348	0	0.499533	1.13106	4.58171	3.98269	3.26137	7.25065	10.585	3.21965	4.53416
ENSG00000089154	10985	GCN1	GCN1 activator of EIF2AK4	162.51	106.853	137.767	118.32	109.976	66.5917	72.7829	75.0115	32.364	50.569	60.4632	67.8789
ENSG00000089157	6175	RPLP0	ribosomal protein lateral stalk subunit P0	2332.89	2054.5	1500.79	1027.64	1153.16	1693.12	434.695	260.776	1124.02	292.099	234.635	302.702
ENSG00000089159	5829	PXN	paxillin	30.0269	23.0162	23.22	21.7555	23.7055	95.8812	27.9388	16.612	11.4732	20.5665	15.6683	17.7489
ENSG00000089163	23409	SIRT4	sirtuin 4	3.97879	3.00075	2.79308	1.87756	2.04964	2.99171	1.6729	1.62115	2.80581	1.19021	1.61785	1.79405
ENSG00000089169	22895	RPH3A	rabphilin 3A	8.41875	11.8915	9.02135	13.5563	43.4378	35.3775	111.113	308.953	137.54	313.495	217.533	223.811
ENSG00000089177	55614	KIF16B	kinesin family member 16B	3.91147	4.63283	8.62398	10.5935	9.78929	9.35172	12.3575	15.544	7.19508	13.4576	18.8345	15.4215
ENSG00000089195	51605	TRMT6	tRNA methyltransferase 6	11.7204	15.2453	13.4835	12.9362	11.0908	5.12566	8.86391	14.6666	17.9183	17.109	16.9389	14.2279
ENSG00000089199	1114	CHGB	chromogranin B	93.0145	97.8702	114.587	94.6529	126.915	50.7336	173.283	434.792	209.824	265.543	352.41	194.898
ENSG00000089220	5037	PEBP1	phosphatidylethanolamine binding protein 1	412.108	481.377	423.97	314.654	470.692	697.194	768.671	879.292	1418.21	890.292	967.86	1107.36
ENSG00000089225	6910	TBX5	T-box 5	0	0	0	0	0	0	0	0.438664	0	0	0	0
ENSG00000089234	8315	BRAP	BRCA1 associated protein	41.141	39.033	44.359	42.4259	42.0997	23.9965	19.9812	26.2245	17.4738	28.5298	24.9606	24.2238
ENSG00000089248	10961	ERP29	endoplasmic reticulum protein 29	94.901	92.6308	100.41	65.99	91.5249	84.4165	69.5304	64.064	102.926	95.9893	66.5581	66.8656
ENSG00000089250	4842	NOS1	nitric oxide synthase 1	2.71728	8.10838	10.3093	10.2835	7.77256	10.8162	25.7935	30.3441	15.3069	50.9438	49.4465	33.9584
ENSG00000089280	2521	FUS	FUS RNA binding protein	569.636	516.854	638.078	630.945	503.646	184.001	273.674	207.831	160.209	246.662	199.967	206.637
ENSG00000089289	3476	IGBP1	immunoglobulin binding protein 1	105.029	88.3988	86.1988	74.1548	77.6401	75.8389	33.8919	34.9977	76.6457	48.2487	41.9157	44.8699
ENSG00000089327	53827	FXYD5	FXYD domain containing ion transport regulator 5	2.5287	1.71863	1.33635	0.91294	2.70053	27.8459	6.28921	3.60467	6.58392	7.45413	4.60016	6.56742
ENSG00000089335	55900	ZNF302	zinc finger protein 302	41.4026	53.8421	54.352	90.4499	58.8936	29.7707	28.5154	26.8348	33.4196	24.9058	35.2093	33.1939
ENSG00000089351	57655	GRAMD1A	GRAM domain containing 1A	141.947	146.705	146.875	154.872	150.012	159.816	81.6434	73.6001	45.0318	52.7962	47.4886	48.8687
ENSG00000089356	5349	FXYD3	FXYD domain containing ion transport regulator 3	0	0	0	0.430632	0	0.606711	1.13539	0.934544	2.63912	2.39662	1.29616	1.68447
ENSG00000089472	9843	HEPH	hephaestin	15.9661	14.5478	11.2949	7.21739	18.3134	42.9091	33.0494	15.9635	19.1962	28.4022	35.0911	36.9681
ENSG00000089486	29965	CDIP1	cell death inducing p53 target 1	78.3784	91.0035	77.3603	63.923	88.3773	182.997	216.902	228.963	230.993	305.097	260.066	275.208
ENSG00000089505	113540	CMTM1	CKLF like MARVEL transmembrane domain containing 1	4.20472	3.92285	4.0187	2.01536	2.98903	1.4854	1.48918	1.43043	0	0.489641	0.986036	0.770125
ENSG00000089558	23415	KCNH4	potassium voltage-gated channel subfamily H member 4	0.759751	1.13058	0.884245	2.08426	1.41247	5.58592	4.35109	4.78716	2.63912	2.63366	3.41281	3.67917
ENSG00000089597	23193	GANAB	glucosidase II alpha subunit	333.257	269.35	257.113	176.576	265.522	209.399	169.354	192.116	97.8143	178.705	168.563	181.653
ENSG00000089639	51291	GMIP	GEM interacting protein	38.791	37.5941	45.4676	50.9696	45.3047	20.398	13.6456	10.6614	9.80643	8.74854	7.77422	9.78046
ENSG00000089682	55285	RBM41	RNA binding motif protein 41	4.44271	3.33122	5.81924	4.32355	3.86696	3.36829	2.88069	4.63458	0.861188	2.12244	2.71726	2.0657
ENSG00000089685	332	BIRC5	baculoviral IAP repeat containing 5	30.5984	18.4571	12.1481	12.6261	2.92496	0.941448	0.761218	0	0	0	0	0
ENSG00000089692	3902	LAG3	lymphocyte activating 3	0	0.778118	0.469983	1.32635	0.491742	0	0	0	0.527825	0	0	0
ENSG00000089693	8079	MLF2	myeloid leukemia factor 2	203.718	251.985	203.323	188.772	226.392	297.518	318.51	345.152	415.731	483.383	338.717	344.427
ENSG00000089723	78990	OTUB2	OTU deubiquitinase, ubiquitin aldehyde binding 2	13.2903	14.9128	11.165	8.49206	10.7591	6.29724	9.00977	13.98	8.02849	6.51822	8.91981	6.99743
ENSG00000089737	57062	DDX24	DEAD-box helicase 24	260.51	209.362	227.969	168.825	220.084	122.786	153.485	269.816	155.875	270.853	287.113	290.123
ENSG00000089775	7597	ZBTB25	zinc finger and BTB domain containing 25	13.1338	12.4469	16.1977	19.1028	14.8216	15.0841	10.0288	9.17379	9.91755	8.50586	12.5421	10.9589
ENSG00000089818	25977	NECAP1	NECAP endocytosis associated 1	140.95	159.27	131.871	92.7237	137.734	89.6049	111.847	207.373	192.934	221.33	176.208	169.584
ENSG00000089820	393	ARHGAP4	Rho GTPase activating protein 4	4.3683	4.62956	4.95811	9.28443	6.82534	22.4901	13.2089	11.1573	8.8619	5.02779	5.42274	9.09843
ENSG00000089847	170961	ANKRD24	ankyrin repeat domain 24	2.34044	3.45852	7.93421	30.4715	13.3114	29.4359	38.9711	45.3731	27.6413	23.3441	25.803	33.0414
ENSG00000089876	55760	DHX32	DEAH-box helicase 32 (putative)	20.6561	19.7527	17.4609	19.4473	19.786	18.557	13.9008	14.7429	11.6399	9.01369	13.8307	14.1467
ENSG00000089902	23186	RCOR1	REST corepressor 1	49.4428	48.4853	50.9413	50.2117	45.2539	24.2475	21.6107	18.2904	6.195	13.5772	17.125	13.8749
ENSG00000089916	55668	GPATCH2L	G-patch domain containing 2 like	83.2998	69.4668	86.2667	73.6036	76.9689	28.3062	35.6134	48.0814	12.8623	29.1032	37.4474	27.2746
ENSG00000090006	8425	LTBP4	latent transforming growth factor beta binding protein 4	75.2373	86.1499	83.368	91.1045	57.4343	75.002	106.88	71.8073	30.8639	46.667	50.8971	57.2573
ENSG00000090013	645	BLVRB	biliverdin reductase B	5.94301	7.28561	6.91277	7.94085	12.8287	79.4373	26.1874	23.6688	61.3666	23.9431	23.1146	32.3419
ENSG00000090020	6548	SLC9A1	solute carrier family 9 member A1	14.2764	20.0108	19.3275	14.5209	23.4272	30.9004	56.7304	53.1546	20.3074	52.5	70.6781	52.3703
ENSG00000090054	10558	SPTLC1	serine palmitoyltransferase long chain base subunit 1	36.9442	34.7479	32.2249	32.0562	32.8801	37.4278	33.7239	45.3349	21.4741	48.7895	45.558	42.3469
ENSG00000090060	10914	PAPOLA	poly(A) polymerase alpha	219.864	216.199	201.272	229.286	198.892	103.538	97.1178	98.1653	85.3687	112.284	110.81	94.0202
ENSG00000090061	8812	CCNK	cyclin K	47.0682	42.4024	47.6259	46.6288	42.9778	41.3609	27.1827	24.3554	18.7517	30.9997	26.2017	22.8079
ENSG00000090097	57060	PCBP4	poly(rC) binding protein 4	119.878	110.449	87.7403	87.9006	80.2929	106.635	84.8981	54.1082	94.9807	64.6611	66.0728	87.497
ENSG00000090104	5996	RGS1	regulator of G protein signaling 1	0.560977	0.986142	0.581694	0.533984	0.831585	42.3652	1.05711	0.438664	0.861188	11.7103	1.03171	1.30282
ENSG00000090238	83719	YPEL3	yippee like 3	42.2652	70.1556	66.0887	100.647	91.1001	207.516	156.213	145.541	264.996	174.689	161.524	178.518
ENSG00000090263	51650	MRPS33	mitochondrial ribosomal protein S33	19.0923	16.7623	16.1931	14.6243	15.2899	24.6241	18.0743	22.2956	71.8675	29.0557	24.7827	27.9584
ENSG00000090266	4708	NDUFB2	NADH:ubiquinone oxidoreductase subunit B2	44.8591	55.9416	36.4644	36.0525	33.5548	68.0144	78.1792	74.2486	265.663	100.46	69.9057	91.9822
ENSG00000090273	10726	NUDC	nuclear distribution C, dynein complex regulator	124.794	114.469	127.057	108.743	97.7835	96.1323	128.286	142.909	143.541	143.697	122.994	131.832
ENSG00000090316	10296	MAEA	macrophage erythroblast attacher	54.255	71.4848	64.2794	65.8178	67.6201	47.7209	54.7642	75.8888	79.4793	67.9594	69.4692	75.5722
ENSG00000090339	3383	ICAM1	intercellular adhesion molecule 1	0.917922	0.700111	0.565617	0.878489	1.39157	14.6238	3.90042	2.87992	1.91684	2.53688	2.4546	2.7627
ENSG00000090372	29888	STRN4	striatin 4	215.831	219.954	213.879	171.615	179.427	160.36	188.548	165.224	100.426	137.866	125.048	121.304
ENSG00000090376	11213	IRAK3	interleukin 1 receptor associated kinase 3	1.94422	2.79084	2.31289	3.80679	6.49828	9.22619	3.94817	1.73558	0	1.26684	1.18495	1.37873
ENSG00000090382	4069	LYZ	lysozyme	0	0	0	0	0.83101	2.19671	0.658069	1.04898	0.638946	1.0373	0.628658	0.658415
ENSG00000090432	79594	MUL1	mitochondrial E3 ubiquitin protein ligase 1	37.1773	38.4506	31.9648	31.3328	33.0028	36.047	33.3223	39.3462	33.3085	36.6533	34.9009	36.1095
ENSG00000090447	7023	TFAP4	transcription factor AP-4	24.6492	18.1085	21.4803	24.4771	14.9281	12.0715	5.20703	3.10879	3.86145	3.61449	4.9597	5.28067
ENSG00000090470	10081	PDCD7	programmed cell death 7	32.4548	24.8935	28.5806	30.506	23.1777	21.5696	21.4422	24.8894	16.9737	18.2631	20.7937	22.8408
ENSG00000090487	51324	SPG21	SPG21 abhydrolase domain containing, maspardin	81.0549	85.0626	65.8163	55.3448	60.0837	53.9136	37.719	36.0658	75.8679	50.8233	53.7811	53.3876
ENSG00000090520	51726	DNAJB11	DnaJ heat shock protein family (Hsp40) member B11	44.0744	44.8236	42.2439	44.5273	35.079	26.4233	33.7407	38.0875	42.8649	39.6969	33.6806	34.1363
ENSG00000090530	55214	P3H2	prolyl 3-hydroxylase 2	5.34559	5.15094	5.04785	2.46321	2.70758	4.87461	3.23718	3.71911	2.97249	2.86196	2.68469	3.17004
ENSG00000090534	7066	THPO	thrombopoietin	0	0	0	0.533984	0.507631	1.06697	1.6107	1.35414	1.91684	1.46081	2.58926	2.6346
ENSG00000090539	8646	CHRD	chordin	2.58026	3.61202	4.99533	9.49113	11.5437	25.3354	34.0039	43.6947	32.864	27.524	24.7911	31.7395
ENSG00000090565	9727	RAB11FIP3	RAB11 family interacting protein 3	69.8821	83.1804	103.165	125.211	97.4135	122.493	159.089	160.875	106.537	106.826	128.238	144.182
ENSG00000090581	84572	GNPTG	N-acetylglucosamine-1-phosphate transferase subunit gamma	20.0202	26.0528	24.1363	28.1978	30.9687	81.4875	84.3956	78.1012	124.594	82.4841	75.6033	88.1704
ENSG00000090612	10795	ZNF268	zinc finger protein 268	25.6471	29.9233	27.4089	24.8561	23.4427	14.0799	13.66	12.1109	6.69504	8.3749	13.2352	10.0407
ENSG00000090615	2802	GOLGA3	golgin A3	47.6443	62.2835	90.2316	113.601	83.2201	71.4873	103.322	131.351	39.8647	55.9831	121.157	92.2939
ENSG00000090621	8761	PABPC4	poly(A) binding protein cytoplasmic 4	100.417	94.4245	101.896	93.8261	89.7685	71.7383	65.022	57.5794	55.6438	60.21	51.825	54.8507
ENSG00000090659	30835	CD209	CD209 molecule	0	0	0	0	0	0.899606	2.22218	1.583	0	0.978387	0.508228	0
ENSG00000090661	79603	CERS4	ceramide synthase 4	34.104	37.9578	34.4	31.5395	38.4295	52.3236	41.6255	49.6071	67.4227	52.0539	42.4845	55.9709
ENSG00000090674	57192	MCOLN1	mucolipin 1	25.9554	29.7098	27.5318	22.5823	30.9889	17.5109	26.2268	34.9977	29.0859	25.7919	25.1281	27.3228
ENSG00000090686	84196	USP48	ubiquitin specific peptidase 48	67.7155	59.5234	81.2222	95.6175	77.2267	34.3733	39.9098	59.9443	33.5863	49.6399	58.7765	55.0037
ENSG00000090776	1947	EFNB1	ephrin B1	197.917	131.919	115.861	82.1129	77.6147	55.3362	27.0304	17.4893	10.8065	10.282	12.0141	10.8697
ENSG00000090857	55066	PDPR	pyruvate dehydrogenase phosphatase regulatory subunit	12.1681	11.7429	21.7883	23.1336	18.2629	22.783	19.8623	16.078	1.9724	15.5246	16.8426	16.0735
ENSG00000090861	16	AARS	alanyl-tRNA synthetase	176.554	139.704	167.534	126.968	156.223	145.757	190.439	307.656	146.43	294.432	269.093	290.924
ENSG00000090863	2734	GLG1	golgi glycoprotein 1	176.293	150.19	185.535	112.464	173.971	140.443	148.399	194.557	74.3122	127.545	162.434	156.73
ENSG00000090889	24137	KIF4A	kinesin family member 4A	76.9007	33.8691	32.1064	27.7155	9.30841	4.28882	3.502	2.84178	0.694506	1.32835	0.790537	0.728573
ENSG00000090905	27327	TNRC6A	trinucleotide repeat containing adaptor 6A	47.8568	70.6962	85.2098	106.469	79.1172	59.2275	66.8423	54.6041	26.6968	33.3927	65.9188	58.9325
ENSG00000090920	---	---	---	1.85067	3.16525	6.21348	11.6615	6.5449	35.8378	5.43525	9.93669	3.91702	5.57952	4.39438	4.14455
ENSG00000090924	64857	PLEKHG2	pleckstrin homology and RhoGEF domain containing G2	58.4813	57.8883	71.2644	81.6306	62.4972	72.6589	19.78	5.24489	2.80581	5.30708	4.17317	4.91786
ENSG00000090932	10683	DLL3	delta like canonical Notch ligand 3	83.9957	79.199	58.9303	52.6232	51.2839	109.48	46.8284	33.2049	48.3099	21.85	11.8442	16.0096
ENSG00000090971	57106	NAT14	N-acetyltransferase 14 (putative)	47.8283	63.0117	47.2288	39.7387	43.4463	75.1275	95.8786	68.5269	114.26	73.5393	62.6864	55.4881
ENSG00000090975	57605	PITPNM2	phosphatidylinositol transfer protein membrane associated 2	9.00813	15.9529	26.3797	25.3384	37.698	49.2273	85.6059	146.838	44.3651	70.9685	92.3562	95.2478
ENSG00000090989	55763	EXOC1	exocyst complex component 1	45.2323	61.217	59.5569	73.9481	76.9862	33.8712	34.6962	56.435	47.032	45.1821	43.379	49.3559
ENSG00000091009	54439	RBM27	RNA binding motif protein 27	77.8649	58.2536	63.874	45.802	49.1298	23.9546	25.3933	33.1668	22.0297	29.1693	29.3267	23.7454
ENSG00000091039	114882	OSBPL8	oxysterol binding protein like 8	161.87	179.714	155.829	131.722	164.415	55.6291	74.9054	111.173	61.3666	90.1913	87.6415	68.177
ENSG00000091073	113878	DTX2	deltex E3 ubiquitin ligase 2	3.00086	3.91287	3.59455	4.59915	4.05725	9.01698	6.48709	4.44385	3.58365	3.28535	3.49783	3.8826
ENSG00000091106	58484	NLRC4	NLR family CARD domain containing 4	0	0.637616	0	0.671786	0.755598	1.4854	1.05886	1.54486	1.30567	1.2927	1.13683	1.265
ENSG00000091127	54517	PUS7	pseudouridine synthase 7	11.2374	10.921	13.5925	10.5591	13.3139	3.5775	5.91903	6.9614	4.9171	5.49149	6.80688	5.92785
ENSG00000091129	4897	NRCAM	neuronal cell adhesion molecule	184.886	218.025	267.307	119.113	232.591	187.181	298.209	581.001	285.164	425.922	463.579	389.397
ENSG00000091136	3912	LAMB1	laminin subunit beta 1	35.8717	24.8208	42.408	20.2397	32.9388	121.782	50.612	37.5534	12.8623	23.1415	42.6899	34.096
ENSG00000091137	5172	SLC26A4	solute carrier family 26 member 4	0	0	1.82851	6.04607	2.571	1.90382	3.87224	10.5089	3.30585	4.69723	3.50449	5.56165
ENSG00000091140	1738	DLD	dihydrolipoamide dehydrogenase	61.8223	57.2067	57.2118	55.5515	55.9228	34.2059	54.6152	77.8342	74.8122	70.0955	73.2337	70.2475
ENSG00000091157	23335	WDR7	WD repeat domain 7	81.4241	61.2941	74.9395	39.3598	66.3345	28.6828	70.6662	177.926	71.2563	119.786	142.074	118.728
ENSG00000091164	9352	TXNL1	thioredoxin like 1	127.576	138.443	108.977	98.1669	98.8126	78.3494	73.9076	105.68	168.376	125.106	103.992	94.1214
ENSG00000091181	3568	IL5RA	interleukin 5 receptor subunit alpha	0	0	0	0	0	1.23434	0.849996	2.3459	0	0	0.464266	0
ENSG00000091262	368	ABCC6	ATP binding cassette subfamily C member 6	0	0	0	0.430632	0	1.35987	1.29051	0.8964	0.416704	0.439904	0.743198	0.873821
ENSG00000091317	54918	CMTM6	CKLF like MARVEL transmembrane domain containing 6	32.9724	30.3227	22.6271	18.0349	22.0748	37.0094	24.1579	16.612	13.1956	18.7466	15.8983	13.626
ENSG00000091409	3655	ITGA6	integrin subunit alpha 6	46.2682	41.4085	38.2351	28.9212	66.2146	196.595	71.3911	43.6566	31.0305	37.8772	41.1042	40.2551
ENSG00000091428	11069	RAPGEF4	Rap guanine nucleotide exchange factor 4	27.1213	32.5919	18.9812	13.4529	19.1508	199.566	460.501	630.398	284.053	508.334	431.885	454.859
ENSG00000091436	51776	MAP3K20	mitogen-activated protein kinase kinase kinase 20	19.8547	19.7414	18.8856	28.37	22.7066	26.8417	31.9663	15.2388	6.36168	13.9533	17.3629	15.8782
ENSG00000091482	23676	SMPX	small muscle protein X-linked	0	0	0	0	0	0	0	0	1.9724	0.870072	0	0.704552
ENSG00000091483	2271	FH	fumarate hydratase	63.7798	56.576	57.8757	38.6708	46.0344	38.6412	50.8465	58.9526	74.8678	60.3718	57.2757	61.3893
ENSG00000091490	23231	SEL1L3	SEL1L family member 3	49.6348	63.3014	110.116	131.584	164.18	52.3654	58.6312	54.8711	27.7525	24.0173	31.5187	29.7221
ENSG00000091513	7018	TF	transferrin	4.26513	5.42673	4.64784	5.83937	5.81074	28.1807	104.895	421.747	594.414	817.466	612.16	781.82
ENSG00000091527	55573	CDV3	CDV3 homolog	153.198	118.53	145.157	144.675	121.517	69.2696	90.1119	93.6642	41.9204	77.6398	91.3795	79.9142
ENSG00000091536	51168	MYO15A	myosin XVA	1.36438	1.02828	1.95722	3.56563	3.50212	5.08382	2.93057	1.81187	2.36132	3.79582	4.02124	4.52262
ENSG00000091542	54890	ALKBH5	alkB homolog 5, RNA demethylase	116.106	100.174	79.2368	58.4454	80.4018	130.401	95.9623	94.5034	112.871	135.278	131.36	123.341
ENSG00000091592	22861	NLRP1	NLR family pyrin domain containing 1	232.036	279.082	211.612	181.503	231.593	230.948	339.785	326.27	432.066	369.656	321.641	363.395
ENSG00000091622	83394	PITPNM3	PITPNM family member 3	14.1133	23.9384	21.0962	25.0283	33.5872	40.1057	126.408	242.505	84.5909	195.263	189.465	158.585
ENSG00000091640	9552	SPAG7	sperm associated antigen 7	50.9284	51.5337	46.3215	42.8737	45.768	43.5367	53.4597	51.8195	78.2014	47.7061	46.469	49.1709
ENSG00000091651	23594	ORC6	origin recognition complex subunit 6	11.9119	11.0241	9.42745	11.7304	4.77243	2.11303	2.79054	3.94797	4.47262	0.814643	3.22654	2.5567
ENSG00000091656	79776	ZFHX4	zinc finger homeobox 4	92.2635	80.2429	86.148	63.8886	62.4697	30.9004	29.739	22.3718	4.52818	21.9524	33.0774	21.2643
ENSG00000091664	57084	SLC17A6	solute carrier family 17 member 6	23.496	52.7854	29.2656	12.4194	24.2419	17.0925	23.9606	27.4832	31.3639	40.8586	35.0456	20.3378
ENSG00000091732	51530	ZC3HC1	zinc finger C3HC-type containing 1	25.8048	22.8137	19.9123	21.101	18.2318	12.7828	12.1882	10.3563	14.6402	13.5111	11.178	11.9128
ENSG00000091831	2099	ESR1	estrogen receptor 1	0	0.403387	0	0.499533	0	0.564869	0.761697	1.16341	0.750067	1.31386	3.37525	1.74502
ENSG00000091844	26575	RGS17	regulator of G protein signaling 17	21.5564	35.47	31.4775	30.4715	30.9584	10.9836	14.3196	18.7481	14.029	15.5899	14.0064	9.4811
ENSG00000091879	285	ANGPT2	angiopoietin 2	12.9345	5.61817	4.84321	6.18388	7.57564	132.158	6.17985	6.12222	1.41679	2.2076	3.07628	3.25453
ENSG00000091947	84336	TMEM101	transmembrane protein 101	28.7155	26.4628	21.6153	21.6177	18.4302	36.9675	20.913	20.9986	34.4197	20.2691	19.8216	24.0248
ENSG00000091972	4345	CD200	CD200 molecule	172.068	173.618	133.434	79.0124	127.262	55.9638	59.2298	97.9364	97.1475	109.715	103.786	97.6672
ENSG00000091986	151887	CCDC80	coiled-coil domain containing 80	3.53997	3.32988	4.02556	4.94366	16.8504	70.5667	36.9898	24.775	24.2522	13.744	13.6219	8.99238
ENSG00000092010	5720	PSME1	proteasome activator subunit 1	43.7921	45.5959	43.1087	39.9799	45.4891	83.0775	48.1876	36.4472	105.537	41.305	42.9742	49.5367
ENSG00000092020	55012	PPP2R3C	protein phosphatase 2 regulatory subunit B''gamma	27.3056	30.7811	25.1556	27.4399	24.1252	21.5278	18.0095	20.3883	59.9776	26.0774	22.1508	23.2198
ENSG00000092036	54930	HAUS4	HAUS augmin like complex subunit 4	10.5142	7.98116	7.90714	7.80305	5.89582	10.2722	3.95579	2.6892	5.52827	2.50371	3.24311	3.89715
ENSG00000092051	84502	JPH4	junctophilin 4	147.354	165.438	216.314	166.482	171.503	212.495	360.449	493.802	316.723	547.179	409.129	403.379
ENSG00000092054	4625	MYH7	myosin heavy chain 7	3.90018	2.28517	2.19859	1.8431	2.02914	3.20092	5.78174	3.45209	2.80581	4.65845	5.85281	6.29311
ENSG00000092068	23428	SLC7A8	solute carrier family 7 member 8	13.0492	11.9617	12.6506	12.006	22.6851	20.5654	44.7946	42.4741	29.1415	37.774	37.8374	37.5337
ENSG00000092094	55644	OSGEP	O-sialoglycoprotein endopeptidase	21.0747	26.7106	24.1113	54.2769	24.8756	27.2601	23.2996	15.2007	29.586	18.4806	19.5389	25.7639
ENSG00000092096	51310	SLC22A17	solute carrier family 22 member 17	200.816	265.509	223.365	194.663	279.761	492.837	621.797	740.293	527.908	782.815	630.169	707.046
ENSG00000092098	55072	RNF31	ring finger protein 31	15.7816	12.4138	14.752	16.0023	13.4622	16.423	13.7178	14.2089	6.86172	16.9526	10.6959	12.2343
ENSG00000092108	23256	SCFD1	sec1 family domain containing 1	45.3811	47.4778	48.2807	54.9314	52.3261	38.9341	36.6981	39.5369	40.0869	36.4584	40.2203	38.2708
ENSG00000092140	55632	G2E3	G2/M-phase specific E3 ubiquitin protein ligase	47.0148	38.5514	38.6436	30.5749	33.1926	9.85382	11.2142	14.5522	8.52854	11.4582	12.2171	10.05
ENSG00000092148	25831	HECTD1	HECT domain E3 ubiquitin protein ligase 1	171.985	137.572	181.151	146.708	153.041	39.3107	105.326	187.042	69.3117	129.483	152.691	136.948
ENSG00000092199	3183	HNRNPC	heterogeneous nuclear ribonucleoprotein C (C1/C2)	652.735	536.684	464.184	361.266	367.465	352.625	204.626	238.5	260.162	299.386	234.325	223.325
ENSG00000092200	57096	RPGRIP1	RPGR interacting protein 1	0.593416	0.501143	0.432497	0.637335	0.460269	0.481184	0.445086	0	0	0	0.498336	0
ENSG00000092201	11198	SUPT16H	SPT16 homolog, facilitates chromatin remodeling subunit	379.527	252.266	275.166	215.299	204.851	83.747	84.3423	102.476	47.6431	84.3709	90.6609	80.7745
ENSG00000092203	9878	TOX4	TOX high mobility group box family member 4	100.152	80.5153	85.0482	63.3718	86.9947	64.2904	55.4016	74.9733	59.4775	86.1637	73.7995	74.5609
ENSG00000092208	8487	GEMIN2	gem nuclear organelle associated protein 2	16.497	13.8228	10.3659	13.763	9.61847	8.6404	6.02589	7.95316	15.5292	7.24003	6.84355	6.79597
ENSG00000092295	7051	TGM1	transglutaminase 1	0	0	0.78118	2.42876	1.48264	1.27618	0.827201	0.629387	0.527825	0	0.558528	0.776099
ENSG00000092330	26277	TINF2	TERF1 interacting nuclear factor 2	58.7874	68.3455	57.7617	59.2033	58.4256	56.0475	34.6774	36.5617	49.3099	34.7571	34.4131	39.9269
ENSG00000092377	90665	TBL1Y	transducin beta like 1 Y-linked	2.61037	0	0.594311	0	0.46739	0	0	0	0	0	0	0
ENSG00000092421	57556	SEMA6A	semaphorin 6A	74.9264	91.2692	97.101	45.8709	115.269	135.422	86.285	65.8568	32.1973	71.0183	78.8296	70.991
ENSG00000092439	54822	TRPM7	transient receptor potential cation channel subfamily M member 7	13.0177	15.9957	18.6927	27.2676	21.3101	15.5025	10.6844	17.3749	4.97266	9.12286	14.9906	11.451
ENSG00000092445	7301	TYRO3	TYRO3 protein tyrosine kinase	83.9636	65.725	71.5074	63.234	52.8132	78.6004	131.266	301.553	186.378	217.579	219.596	237.171
ENSG00000092470	79968	WDR76	WD repeat domain 76	43.927	25.5585	24.2411	24.3393	15.0968	5.41856	3.57264	2.07888	1.36123	2.12044	1.93462	1.31479
ENSG00000092529	825	CAPN3	calpain 3	0	0	0	0	0	0	0.780371	1.81187	6.91728	3.81859	5.29908	9.05124
ENSG00000092531	8773	SNAP23	synaptosome associated protein 23	5.27719	5.01883	5.03695	7.32074	6.80903	18.7244	9.72362	7.49543	8.8619	8.65484	9.15296	9.25717
ENSG00000092607	6913	TBX15	T-box 15	1.50982	0.59276	0.417791	0.637335	0.860498	2.32224	1.14576	1.2397	0	0.574657	0.840839	0.620077
ENSG00000092621	26227	PHGDH	phosphoglycerate dehydrogenase	246.351	142.998	130.351	101.474	101.456	301.786	196.811	117.81	185.989	166.067	162.775	181.584
ENSG00000092758	1299	COL9A3	collagen type IX alpha 3 chain	7.43938	14.0426	19.216	76.5319	27.7041	27.302	29.7285	35.4173	29.197	36.0864	25.6505	43.4588
ENSG00000092820	7430	EZR	ezrin	296.854	266.252	364.883	331.225	435.831	262.036	293.838	178.193	183.044	143.679	204.029	164.941
ENSG00000092841	4637	MYL6	myosin light chain 6	471.834	483.88	356.898	346.418	360.941	595.183	321.558	257.953	1148.35	257.619	250.033	294.772
ENSG00000092847	26523	AGO1	argonaute RISC component 1	136.385	117.554	117.887	109.88	103.827	54.8759	69.2646	75.7362	33.4752	62.6273	92.3322	66.7328
ENSG00000092850	27285	TEKT2	tektin 2	8.15036	7.50156	8.79543	12.2816	9.43491	12.8246	6.09183	3.83354	2.36132	1.91005	2.29248	2.76111
ENSG00000092853	63967	CLSPN	claspin	19.6	9.9096	14.9189	11.0414	5.1121	0.899606	1.96894	3.29951	1.08343	0.725604	1.59122	0.88057
ENSG00000092871	117584	RFFL	ring finger and FYVE like domain containing E3 ubiquitin protein ligase	24.9671	17.6533	21.754	17.5526	16.228	15.8372	8.67507	16.078	11.0843	19.5796	24.3598	23.4819
ENSG00000092929	201294	UNC13D	unc-13 homolog D	0.542815	0.423578	0.607719	2.87662	2.08302	13.4941	4.67867	3.07065	3.02805	1.62948	3.2867	5.01124
ENSG00000092931	79157	MFSD11	major facilitator superfamily domain containing 11	10.4907	10.3471	11.2903	11.9716	11.4699	13.787	9.8626	10.5851	7.97293	10.7054	11.0369	10.6085
ENSG00000092964	1808	DPYSL2	dihydropyrimidinase like 2	1634.41	1459.74	1571.4	1176.3	1728.36	1035.36	664.662	960.883	818.767	1220.88	1339.06	1096.06
ENSG00000092969	7042	TGFB2	transforming growth factor beta 2	7.54271	17.1781	22.8282	37.8095	51.0369	58.3488	48.4873	26.3007	14.029	29.8973	32.0771	21.2808
ENSG00000092978	55105	GPATCH2	G-patch domain containing 2	26.7921	22.4023	19.5328	16.0023	15.5264	8.76593	12.1091	14.6666	11.3621	15.3577	14.9138	11.0814
ENSG00000093000	10762	NUP50	nucleoporin 50	81.4373	68.5162	70.061	65.4044	53.7492	26.6744	37.8165	43.9236	23.4188	43.3181	41.0616	35.2285
ENSG00000093009	8318	CDC45	cell division cycle 45	24.0467	15.4974	13.1823	14.6587	4.15377	0.98329	0.421754	0.82011	0	0	0	0
ENSG00000093010	1312	COMT	catechol-O-methyltransferase	53.3495	61.843	53.8459	54.1735	81.3207	241.032	142.02	93.1684	153.93	91.1167	81.4278	100.911
ENSG00000093072	51816	ADA2	adenosine deaminase 2	6.07442	3.2365	5.1625	8.04421	8.20111	6.46461	5.25605	5.28304	2.63912	4.54697	5.60324	5.03117
ENSG00000093144	55862	ECHDC1	ethylmalonyl-CoA decarboxylase 1	33.7968	38.2652	34.7888	34.2611	31.4873	22.1972	24.9918	34.6163	59.5331	38.824	40.1442	37.638
ENSG00000093167	9209	LRRFIP2	LRR binding FLII interacting protein 2	29.0994	20.8789	31.2597	41.3923	28.9879	28.7246	32.2185	23.3636	22.4742	32.7521	36.4984	33.6789
ENSG00000093183	9117	SEC22C	SEC22 homolog C, vesicle trafficking protein	60.4429	60.0345	56.2705	56.7228	54.6325	40.1057	49.966	58.8763	46.143	54.7976	69.3111	62.8158
ENSG00000093217	9942	XYLB	xylulokinase	3.02931	1.80526	2.98744	1.73975	2.33991	1.86197	1.87149	2.49848	1.08343	2.62864	1.97621	1.89965
ENSG00000094631	10013	HDAC6	histone deacetylase 6	100.334	71.4884	96.6684	99.3037	88.4953	71.1944	66.6806	48.0432	37.8089	40.7106	47.4977	62.5241
ENSG00000094796	3881	KRT31	keratin 31	0	0	0.696601	0.94739	0	1.27618	2.44778	1.65929	4.41706	0	1.35263	0.464433
ENSG00000094804	990	CDC6	cell division cycle 6	19.4649	12.0737	10.8801	10.9725	4.07413	0.98329	2.04989	3.29951	2.528	1.60136	2.65522	2.33394
ENSG00000094841	139596	UPRT	uracil phosphoribosyltransferase homolog	16.1166	15.5673	15.3267	13.2118	16.9939	11.1928	11.2841	14.8192	14.6958	20.0153	15.6222	13.2531
ENSG00000094880	8697	CDC23	cell division cycle 23	34.4848	33.6682	29.363	31.7117	32.3183	30.2728	22.3472	23.1347	21.5853	26.7744	22.1464	21.7379
ENSG00000094914	8086	AAAS	aladin WD repeat nucleoporin	71.8117	59.348	55.49	57.653	50.9214	43.1602	27.5306	19.6636	23.6966	21.3178	19.6283	29.2455
ENSG00000094916	23468	CBX5	chromobox 5	891.129	550.838	537.502	334.567	340.074	126.133	201.349	180.863	125.872	242.5	233.137	172.164
ENSG00000094963	2327	FMO2	flavin containing monooxygenase 2	0	0	0	0	0	1.56908	0.944562	0.667532	0	0	1.0964	1.11577
ENSG00000094975	51430	SUCO	SUN domain containing ossification factor	85.1916	77.8365	76.5031	73.0869	72.5903	32.9925	32.1638	37.6679	27.0857	36.2654	39.1374	33.7554
ENSG00000095002	4436	MSH2	mutS homolog 2	101.672	73.3398	76.4515	71.0543	56.464	21.6951	24.2749	40.6813	26.6968	26.4154	32.1966	32.9255
ENSG00000095015	4214	MAP3K1	mitogen-activated protein kinase kinase kinase 1	30.5208	20.5885	19.553	21.79	22.1842	24.5404	18.8052	11.6913	6.41724	13.016	10.7306	7.7507
ENSG00000095059	1725	DHPS	deoxyhypusine synthase	95.9923	97.6974	90.3458	85.179	101.205	76.8012	45.3508	48.768	69.7006	47.8899	48.1707	55.2873
ENSG00000095066	29911	HOOK2	hook microtubule tethering protein 2	10.0516	9.87906	14.3854	20.8943	15.9896	17.3854	16.4876	12.4542	12.0844	7.71338	9.74791	14.9594
ENSG00000095139	372	ARCN1	archain 1	143.609	117.832	122.252	85.179	132.735	92.8268	81.9933	116.017	62.9778	121.762	109.515	101.276
ENSG00000095203	54566	EPB41L4B	erythrocyte membrane protein band 4.1 like 4B	5.69844	6.38293	4.55143	4.18574	4.12819	22.4065	29.9915	54.3752	33.1974	76.2396	65.8233	49.7523
ENSG00000095209	55151	TMEM38B	transmembrane protein 38B	10.6384	8.51185	7.50683	4.6336	6.23725	8.26382	8.10376	9.0975	11.3066	14.9393	9.8326	9.92924
ENSG00000095261	5711	PSMD5	proteasome 26S subunit, non-ATPase 5	16.8606	15.1159	15.1493	17.2081	18.7304	13.4104	10.8729	14.6666	8.13961	14.0561	14.9503	12.458
ENSG00000095303	5742	PTGS1	prostaglandin-endoperoxide synthase 1	0.77996	0.68085	0.463365	0	1.12388	2.57329	2.15634	10.2037	2.02796	2.04702	1.00934	2.7948
ENSG00000095319	23511	NUP188	nucleoporin 188	108.95	79.1303	87.3993	73.7759	68.924	37.0512	38.0014	31.7173	10.8621	21.0859	30.8677	31.2725
ENSG00000095321	1384	CRAT	carnitine O-acetyltransferase	43.4718	52.5757	52.1187	53.1744	75.2736	109.396	98.6471	74.2867	68.8117	72.2934	75.5837	78.9155
ENSG00000095370	10044	SH2D3C	SH2 domain containing 3C	42.1719	30.9592	31.934	14.8999	21.5459	44.2062	36.8811	36.9813	24.5855	22.5436	27.8767	25.5854
ENSG00000095380	54187	NANS	N-acetylneuraminate synthase	12.3108	12.9953	13.5857	10.5935	15.6723	15.5025	16.1346	17.4893	27.3635	19.8648	18.6494	18.9624
ENSG00000095383	55357	TBC1D2	TBC1 domain family member 2	1.34329	1.89164	2.50221	5.32261	3.0755	7.00856	5.10797	4.93973	6.36168	3.68801	6.68657	9.08066
ENSG00000095397	25861	WHRN	whirlin	14.2356	15.4008	14.2676	12.385	13.0452	29.2267	21.3019	31.374	16.5848	17.8171	28.9541	36.9453
ENSG00000095464	5146	PDE6C	phosphodiesterase 6C	0	0	0	0.430632	0	0	0	0	0	0	0	0
ENSG00000095485	55280	CWF19L1	CWF19 like cell cycle control factor 1	17.0446	15.3929	16.2605	20.4464	15.2589	11.4857	6.81735	8.67791	14.1957	7.17132	8.58799	10.3854
ENSG00000095539	57715	SEMA4G	semaphorin 4G	14.0244	27.0329	36.6372	31.4017	52.2613	46.2565	33.1018	13.8656	8.52854	14.0068	14.0133	14.3722
ENSG00000095564	9044	BTAF1	B-TFIID TATA-box binding protein associated factor 1	56.5576	40.4476	55.4397	65.6455	45.9915	30.6494	26.8485	28.8946	12.4733	23.2931	27.7605	26.7975
ENSG00000095574	64376	IKZF5	IKAROS family zinc finger 5	19.7919	26.9468	23.8353	32.2629	33.7273	19.9378	19.0352	24.2791	27.9192	33.7956	34.2523	31.7809
ENSG00000095585	29760	BLNK	B cell linker	0	0	0	0	0.609788	1.4854	1.36408	2.3459	2.47244	0.808312	1.26985	2.07863
ENSG00000095587	7093	TLL2	tolloid like 2	1.27397	3.2832	1.89108	0.706236	0.685012	1.69461	2.40743	7.07584	5.13935	8.1446	7.71993	8.5007
ENSG00000095596	1592	CYP26A1	cytochrome P450 family 26 subfamily A member 1	1.20891	0.892848	1.85794	5.15036	3.98373	1.1925	1.57928	5.81706	3.91702	1.74389	0.683586	2.31187
ENSG00000095627	56165	TDRD1	tudor domain containing 1	0	0	0	0	0	0	0.500381	0	0	0	0	0
ENSG00000095637	10580	SORBS1	sorbin and SH3 domain containing 1	84.0078	81.3704	117.002	116.736	145.389	204.043	149.925	164.575	58.4219	111.252	166.273	171.007
ENSG00000095713	55118	CRTAC1	cartilage acidic protein 1	4.55092	8.13091	4.3587	5.15036	13.5874	10.607	33.5518	69.1754	58.3107	42.3122	21.6346	29.1822
ENSG00000095739	25805	BAMBI	BMP and activin membrane bound inhibitor	3.97765	3.9508	2.9255	2.56657	4.78838	40.817	28.3678	18.1759	31.0305	20.4131	14.2146	15.2426
ENSG00000095752	3589	IL11	interleukin 11	0	0	0	0	0.511556	0.523027	0.636474	0	1.19455	0	0.594335	0
ENSG00000095777	53904	MYO3A	myosin IIIA	13.7515	12.7469	10.6093	35.1912	9.23907	4.3725	2.89231	1.08712	0.750067	0.56675	0.678827	0.577886
ENSG00000095787	51322	WAC	WW domain containing adaptor with coiled-coil	161.328	166.067	185.412	173.889	184.303	125.171	121.961	160.112	137.651	193.413	200.289	167.985
ENSG00000095794	1390	CREM	cAMP responsive element modulator	14.5939	14.0652	11.4804	12.5228	10.1656	37.7207	31.222	26.1482	60.0887	35.1625	29.0452	32.0798
ENSG00000095906	10101	NUBP2	nucleotide binding protein 2	60.8463	75.7575	55.6909	55.8616	52.8282	80.1068	56.515	40.4906	110.315	41.2448	31.2145	42.4708
ENSG00000095932	284422	SMIM24	small integral membrane protein 24	0	0	0	0	0	1.06697	0	1.16341	0.805627	2.57444	1.54773	1.5135
ENSG00000095951	3096	HIVEP1	human immunodeficiency virus type I enhancer binding protein 1	18.6746	22.3435	37.7149	40.2555	45.5222	18.9754	29.298	38.24	8.52854	14.2599	22.0556	23.5178
ENSG00000095970	54209	TREM2	triggering receptor expressed on myeloid cells 2	1.54951	3.50191	1.70955	1.94646	8.23832	14.1636	5.79492	7.76244	11.9733	4.34117	2.8042	4.49013
ENSG00000096060	2289	FKBP5	FKBP prolyl isomerase 5	17.4409	7.48502	8.49722	5.52931	6.48888	24.0801	6.37429	6.9614	3.52809	21.041	10.1535	13.4221
ENSG00000096063	6732	SRPK1	SRSF protein kinase 1	98.4182	80.1128	92.8357	73.3969	74.7762	18.8499	25.6838	38.0875	25.1411	28.7693	27.8943	26.9489
ENSG00000096070	27154	BRPF3	bromodomain and PHD finger containing 3	49.966	51.149	69.8123	67.6437	66.6421	29.7288	63.1876	86.1497	20.2518	70.4004	60.1213	55.1074
ENSG00000096080	55168	MRPS18A	mitochondrial ribosomal protein S18A	10.8905	8.9058	8.74656	7.25184	6.38098	11.5693	11.4904	11.348	20.5296	19.485	9.67587	11.9357
ENSG00000096092	28978	TMEM14A	transmembrane protein 14A	27.2725	42.5742	36.489	38.533	51.1928	41.0262	33.6804	45.4494	104.426	68.633	44.7006	46.9545
ENSG00000096093	114327	EFHC1	EF-hand domain containing 1	20.6607	16.7485	15.112	15.0721	13.287	20.2725	18.7531	18.2141	9.97311	10.3135	11.8878	12.528
ENSG00000096384	3326	HSP90AB1	heat shock protein 90 alpha family class B member 1	1652.6	1248.56	1442.02	1066.95	1336.55	802.511	1036.51	1610.68	1025.84	1505.02	1506.84	1411.71
ENSG00000096401	988	CDC5L	cell division cycle 5 like	114.306	81.8021	92.4841	81.7684	88.8495	35.6704	37.9619	48.8824	31.2528	43.6288	43.8372	37.339
ENSG00000096433	3710	ITPR3	inositol 1,4,5-trisphosphate receptor type 3	3.47135	2.32221	3.82313	3.73789	5.41965	34.4151	12.7881	6.88511	2.30576	2.76285	4.50237	7.75466
ENSG00000096654	7738	ZNF184	zinc finger protein 184	34.9191	31.9967	27.6199	29.3002	25.179	5.71145	8.4843	25.6904	11.4732	12.1219	14.4466	12.574
ENSG00000096696	1832	DSP	desmoplakin	9.18531	3.41757	4.10085	2.56657	6.91831	11.5275	16.1406	13.8274	5.13935	7.70662	19.5414	11.9553
ENSG00000096717	23411	SIRT1	sirtuin 1	56.8256	61.2408	59.5147	62.6828	59.4727	17.5109	19.7154	20.1213	10.5843	26.1968	22.132	18.9245
ENSG00000096746	3189	HNRNPH3	heterogeneous nuclear ribonucleoprotein H3	385.629	283.888	392.361	356.512	270.8	134.083	131.449	103.887	101.259	148.894	136.003	119.461
ENSG00000096872	80173	IFT74	intraflagellar transport 74	13.1985	11.2672	10.8426	11.8338	8.65043	8.72408	8.35246	9.17379	5.97275	4.71003	8.68012	5.89916
ENSG00000096968	3717	JAK2	Janus kinase 2	19.5102	18.3026	17.7472	16.0023	18.0703	8.38935	14.7937	18.1378	6.69504	17.4571	15.0315	12.0404
ENSG00000096996	3594	IL12RB1	interleukin 12 receptor subunit beta 1	0	0	0	0	0	0.439342	0.61081	0.705676	1.30567	0.883518	0.710725	1.07083
ENSG00000097007	25	ABL1	ABL proto-oncogene 1, non-receptor tyrosine kinase	208.522	162.956	195.859	199.555	171.528	144.962	117.825	87.1796	30.1971	58.1301	90.7587	80.774
ENSG00000097021	11332	ACOT7	acyl-CoA thioesterase 7	159.244	168.576	151.301	88.1073	121.261	61.5288	146.619	266.498	302.944	227.976	222.847	222.257
ENSG00000097033	51100	SH3GLB1	SH3 domain containing GRB2 like, endophilin B1	119.402	109.835	116.107	93.6883	120.213	91.2368	63.16	53.3072	35.2531	58.4018	59.1792	50.3707
ENSG00000097046	8317	CDC7	cell division cycle 7	35.6916	31.699	27.6567	32.7797	15.585	9.22619	10.9089	12.1109	6.86172	7.4426	7.30937	7.41718
ENSG00000097096	84144	SYDE2	synapse defective Rho GTPase homolog 2	1.90478	0.591382	0.915402	0.637335	0.514994	0	0.856612	3.45209	0.694506	1.43109	2.22781	1.17406
ENSG00000099139	5125	PCSK5	proprotein convertase subtilisin/kexin type 5	3.69336	4.04409	14.2372	7.9753	13.0801	12.9501	14.4833	16.6501	7.69513	9.66088	7.61107	8.62175
ENSG00000099194	6319	SCD	stearoyl-CoA desaturase	471.795	365.479	439.009	285.475	462.593	465.054	731.183	730.68	648.197	1634.25	1177.63	1080.64
ENSG00000099203	11018	TMED1	transmembrane p24 trafficking protein 1	6.99277	7.62912	5.10482	4.358	5.84785	10.1049	6.40225	4.67272	9.02858	4.3233	4.49919	5.41107
ENSG00000099204	3983	ABLIM1	actin binding LIM protein 1	92.246	99.3232	138.426	127.45	122.798	233.458	275.173	196.35	93.7583	158.294	239.567	203.216
ENSG00000099219	79956	ERMP1	endoplasmic reticulum metallopeptidase 1	18.4531	13.1181	14.3328	11.3515	14.8118	26.3396	39.856	48.1958	22.6409	52.8934	55.6492	59.6904
ENSG00000099246	22931	RAB18	RAB18, member RAS oncogene family	120.477	173.696	120.228	103.61	146.885	107.179	105.354	123.036	141.04	170.79	134.359	115.502
ENSG00000099250	8829	NRP1	neuropilin 1	33.8973	36.222	43.2384	35.1912	105.394	83.9562	46.1506	72.4558	15.7514	16.8187	31.4175	24.2194
ENSG00000099251	158160	HSD17B7P2	hydroxysteroid 17-beta dehydrogenase 7 pseudogene 2	0.939449	0.998859	1.35006	1.39525	1.41278	1.65276	1.13409	0.8964	0.861188	0.964828	1.19292	0.920106
ENSG00000099256	56952	PRTFDC1	phosphoribosyl transferase domain containing 1	41.2898	35.8148	34.9054	34.6745	34.8137	31.9046	20.7829	16.9172	43.6428	33.5124	24.5345	23.6101
ENSG00000099260	54873	PALMD	palmdelphin	14.6631	9.00072	18.1297	10.6969	19.126	27.302	14.2446	9.97483	10.9176	10.2608	9.14752	8.03498
ENSG00000099282	23555	TSPAN15	tetraspanin 15	10.4735	8.86475	6.3012	3.80679	7.90323	20.2725	18.6199	29.543	56.255	51.5663	40.8985	49.1993
ENSG00000099284	55506	H2AFY2	H2A histone family member Y2	218.609	152.655	138.502	89.7954	80.077	23.4107	25.0905	15.2388	17.2515	15.9851	13.2325	11.3493
ENSG00000099290	387680	WASHC2A	WASH complex subunit 2A	4.25185	2.97337	4.40438	2.91107	4.69484	2.40592	3.32565	3.26137	2.36132	2.83892	3.67505	2.96935
ENSG00000099308	23031	MAST3	microtubule associated serine/threonine kinase 3	21.4581	24.9676	31.8104	27.3021	29.1827	33.913	116.721	345.648	87.9245	265.914	325.535	273.716
ENSG00000099326	7593	MZF1	myeloid zinc finger 1	16.2017	19.3002	21.0974	25.7862	21.3076	35.4194	34.1678	25.3471	21.363	14.6055	20.6105	29.779
ENSG00000099330	79629	OCEL1	occludin/ELL domain containing 1	1.75965	3.064	3.20422	3.32448	4.1035	17.762	11.2231	9.0975	15.3625	7.63083	7.81954	8.23035
ENSG00000099331	4650	MYO9B	myosin IXB	43.9314	42.868	74.0946	121.731	62.6083	72.1986	63.7709	53.9556	33.0307	34.8293	57.104	70.5878
ENSG00000099337	9424	KCNK6	potassium two pore domain channel subfamily K member 6	0	0	0	0	0	0.690395	0.502373	0.743821	0	0	0.560598	0.743723
ENSG00000099338	57828	CATSPERG	cation channel sperm associated auxiliary subunit gamma	1.06171	1.4553	2.25578	5.87382	3.25497	2.40592	3.02503	1.69744	3.41697	0.874962	2.86576	2.16609
ENSG00000099341	5714	PSMD8	proteasome 26S subunit, non-ATPase 8	163.319	180.769	140.695	110.604	147.981	149.104	122.68	172.357	302.777	172.966	146.412	166.892
[truncated: 20,029 more rows]

## Sheet: cpm_Hippocampus.xls
ensembl	entrez	symbol	genename	mean.2A	mean.2B	mean.3A	mean.3B	mean.4	mean.5	mean.6	mean.7	mean.8	mean.9	mean.10	mean.11
ENSG00000225972	---	---	---	0	1.04008	0.892667	2.15938	4.11574	8.60795	150.535	10.2684	87.1334	284.86	300.298	147.797
ENSG00000225630	---	---	---	7.6777	3.45277	7.61009	6.0607	12.8813	16.7188	117.555	31.2642	9667.28	89.6448	148.537	108.314
ENSG00000237973	---	---	---	97.5412	70.893	25.9545	76.4877	98.8548	259.939	2503.26	145.46	2646.8	1460.83	2578.92	919.872
ENSG00000229344	---	---	---	1.45798	1.22995	1.76523	4.95785	4.96009	11.9569	37.7438	10.6126	136.834	25.779	43.4054	22.4018
ENSG00000248527	---	---	---	2.15746	2.40069	4.03497	9.17441	12.004	18.4979	202.054	23.4625	1303.84	226.024	216.896	120.606
ENSG00000198744	---	---	---	148.319	148.029	132.205	635.418	361.551	1709.74	2829.41	1069.46	14874.3	1677.68	4941.25	1131.59
ENSG00000188290	57801	HES4	hes family bHLH transcription factor 4	54.4746	31.9849	32.7307	80.1259	28.1373	100.496	23.768	15.4696	48.4893	11.0547	15.4172	17.0016
ENSG00000187608	9636	ISG15	ISG15 ubiquitin like modifier	4.56061	3.94042	3.31211	23.3112	9.90858	69.0991	32.6986	30.92	872.019	45.3253	41.3935	28.5493
ENSG00000188157	375790	AGRN	agrin	358.951	268.16	277.452	175.936	220.693	562.29	195.869	145.651	246.764	46.4954	71.9833	104.572
ENSG00000162571	254173	TTLL10	tubulin tyrosine ligase like 10	0	0	0	0	0.887343	9.39287	0.756038	1.24292	0	0	0	0
ENSG00000162572	6339	SCNN1D	sodium channel epithelial 1 delta subunit	1.25198	3.21427	4.21581	15.2746	5.66794	29.9054	8.59392	5.6027	3.31686	2.3422	3.15394	11.5196
ENSG00000235098	441869	ANKRD65	ankyrin repeat domain 65	1.37455	1.33508	1.14254	5.40506	4.27761	12.2186	6.86624	6.02338	14.689	4.08403	6.75851	7.98038
ENSG00000205116	643965	TMEM88B	transmembrane protein 88B	0	0	0	0	0	0.601771	2.2175	13.2514	23.0074	7.14865	4.41771	11.274
ENSG00000179403	64856	VWA1	von Willebrand factor A domain containing 1	35.9874	25.933	25.9835	32.8	27.9196	250.625	68.4141	71.42	317.734	81.6047	113.873	89.6948
ENSG00000228594	643988	FNDC10	fibronectin type III domain containing 10	7.71736	13.716	7.99821	97.1905	37.697	42.0455	28.4808	22.9271	39.855	20.8704	35.9535	36.5186
ENSG00000142609	85452	CFAP74	cilia and flagella associated protein 74	0.82931	0.43584	0	2.90674	9.72349	48.9005	3.20541	6.13811	2.79038	2.04792	2.25248	4.48695
ENSG00000187730	2563	GABRD	gamma-aminobutyric acid type A receptor delta subunit	3.44785	1.27324	1.41884	3.31217	4.39709	8.76493	45.8695	111.691	39.5391	72.3923	37.7151	97.1996
ENSG00000149527	9651	PLCH2	phospholipase C eta 2	13.8373	13.885	13.8459	18.5157	15.6627	21.376	77.4661	74.9767	22.6915	35.6166	38.4411	65.7848
ENSG00000197921	388585	HES5	hes family bHLH transcription factor 5	52.9805	4.85501	12.8909	15.6672	8.85808	35.5045	24.2229	2.04604	26.7981	3.32628	14.1037	4.33678
ENSG00000272449	---	---	---	5.00764	0.477861	0.510528	0.890012	0.600004	0.968067	3.23742	0.516289	6.37048	0.87297	6.84321	2.33881
ENSG00000157873	8764	TNFRSF14	TNF receptor superfamily member 14	1.78429	2.04507	1.86736	3.86945	3.45218	37.2313	10.4704	11.9129	18.6902	15.1503	13.0617	16.8034
ENSG00000142606	79258	MMEL1	membrane metalloendopeptidase like 1	2.77123	5.03369	4.36529	2.31069	1.46095	3.79378	0	0	0	0	0	0
ENSG00000215912	100287898	TTC34	tetratricopeptide repeat domain 34	0	0	0	0	0.996036	17.1374	1.33929	1.08994	0	0	0.465591	0.866554
ENSG00000177133	440556	PRDM16-DT	PRDM16 divergent transcript	6.28212	6.8242	12.2829	4.35223	6.1997	118.706	17.8859	15.8138	24.6922	8.48144	12.6295	21.5927
ENSG00000142611	63976	PRDM16	PR/SET domain 16	28.9188	29.4263	44.5516	6.79549	16.878	84.2218	17.4861	13.5191	9.73999	9.47338	10.4402	13.1766
ENSG00000162591	1953	MEGF6	multiple EGF like domains 6	21.1762	8.45911	9.28762	4.52375	4.90874	42.9351	7.66746	4.53187	3.73805	1.79628	2.85286	4.01822
ENSG00000158109	127262	TPRG1L	tumor protein p63 regulated 1 like	20.2026	27.6372	19.21	58.2338	46.6582	55.5461	64.5025	159.227	112.299	216.07	175.931	196.229
ENSG00000078900	7161	TP73	tumor protein p73	37.953	13.5118	5.81088	7.70596	11.1384	45.4991	6.89202	5.64094	4.15924	1.25234	1.97902	2.44077
ENSG00000196581	55966	AJAP1	adherens junctions associated protein 1	14.9763	16.7094	10.1284	23.2382	38.0124	11.5383	35.1155	108.402	17.532	80.5932	33.58	79.2799
ENSG00000069424	8514	KCNAB2	potassium voltage-gated channel subfamily A regulatory beta subunit 2	12.7564	20.2578	16.2464	41.0741	37.6531	61.4068	150.049	512.178	141.993	513.569	261.991	589.884
ENSG00000116254	26038	CHD5	chromodomain helicase DNA binding protein 5	12.1758	53.5875	39.0545	123.56	179.225	59.68	136.312	294.304	110.72	172.126	132.819	257.911
ENSG00000158292	387509	GPR153	G protein-coupled receptor 153	72.6609	88.3257	91.7307	180.032	91.9307	43.4584	51.0659	51.801	28.4829	41.73	15.288	35.1281
ENSG00000187017	83715	ESPN	espin	0.666754	0	0.582266	0.462442	0.812291	8.03234	1.2163	0.592777	0.789729	0	0	0
ENSG00000215788	8718	TNFRSF25	TNF receptor superfamily member 25	1.03608	2.80335	3.47133	9.72375	4.90908	29.2775	6.67222	4.14944	2.26389	2.36738	2.53182	10.116
ENSG00000162413	9903	KLHL21	kelch like family member 21	20.7683	21.1744	23.7777	25.3657	24.9675	180.558	46.4205	58.9144	84.501	52.5146	65.5651	77.7436
ENSG00000049245	9341	VAMP3	vesicle associated membrane protein 3	33.4683	24.7739	22.3241	20.3559	31.9981	101.804	53.8797	57.6906	172.74	89.5342	111.209	80.6224
ENSG00000049246	8863	PER3	period circadian regulator 3	10.621	10.4631	13.9306	5.1096	14.195	45.8654	53.0944	34.3619	19.7432	25.1008	40.7647	31.2247
ENSG00000142583	6518	SLC2A5	solute carrier family 2 member 5	3.53264	1.44804	2.13096	3.04341	4.644	53.9763	7.08056	8.77692	7.73934	12.0749	5.09434	7.32627
ENSG00000162444	116362	RBP7	retinol binding protein 7	0	0	0	0	0	0	0.814558	1.93131	8.58172	3.59387	7.70742	4.82919
ENSG00000142657	5226	PGD	phosphogluconate dehydrogenase	399.245	354.494	363.092	420.321	242.55	93.3269	110.514	95.1311	97.2419	109.012	107.076	88.7068
ENSG00000241563	1325	CORT	cortistatin	0	0.449951	0.725919	3.79167	2.37149	1.54367	3.31339	6.52054	3.94864	4.61644	3.84476	4.09803
ENSG00000204624	57540	DISP3	dispatched RND transporter family member 3	39.0061	118.95	116.005	89.4023	49.7162	36.9174	29.7647	12.9072	14.2678	12.4857	6.80481	15.8376
ENSG00000116661	26232	FBXO2	F-box protein 2	1.16067	1.48676	2.65595	26.5333	19.8357	144.085	100.894	109.931	355.22	134.371	321.749	186.801
ENSG00000132879	93611	FBXO44	F-box protein 44	22.8506	42.6298	41.0192	187.413	99.2757	81.5008	128.135	162.172	150.522	189.58	157.224	213.486
ENSG00000116670	10459	MAD2L2	mitotic arrest deficient 2 like 2	119.669	99.4971	104.256	118.96	53.1538	68.5758	31.971	16.8463	46.594	20.6532	30.6286	23.6146
ENSG00000162490	374946	DRAXIN	dorsal inhibitory axon guidance protein	119.871	145.858	158.123	200.93	212.317	35.1382	19.5116	3.95822	1.21092	0.873966	2.44346	3.29704
ENSG00000028137	7133	TNFRSF1B	TNF receptor superfamily member 1B	16.3407	5.96081	4.54591	3.75067	6.65125	54.0286	10.8463	12.6395	31.3259	8.9708	4.73824	7.58057
ENSG00000162496	9249	DHRS3	dehydrogenase/reductase 3	10.792	12.53	16.595	10.7585	14.1024	139.899	33.2649	23.7684	67.7587	33.0619	51.8287	30.2791
ENSG00000157330	93190	C1orf158	chromosome 1 open reading frame 158	0	0	0	1.48876	4.80442	21.4283	2.81197	1.77833	3.42216	0	0.552807	0.843564
ENSG00000162493	10630	PDPN	podoplanin	49.704	36.4546	38.3002	9.81454	38.5218	80.7159	27.8831	15.9285	14.7943	10.6447	9.34352	6.79401
ENSG00000142621	114827	FHAD1	forkhead associated phosphopeptide binding domain 1	0.832475	1.15295	1.19801	2.15139	8.09848	18.9689	4.24148	5.33499	2.79038	1.33904	1.87708	2.35485
ENSG00000162458	54751	FBLIM1	filamin binding LIM protein 1	13.1795	17.2239	12.6167	36.8331	17.3828	11.9569	7.95886	4.57012	4.05394	2.1124	3.45257	3.21139
ENSG00000183888	149563	SRARP	steroid receptor associated and regulated protein	1.79246	0.715877	0.884805	1.64121	0.770809	17.8177	2.38023	1.6636	12.3724	0.9936	2.53411	1.55869
ENSG00000173641	27129	HSPB7	heat shock protein family B (small) member 7	0	0	0	0	0.44417	4.10774	2.30623	2.42847	2.47448	2.69534	2.63877	4.06494
ENSG00000185519	348487	FAM131C	family with sequence similarity 131 member C	1.66625	3.26781	2.1191	13.2979	6.76482	15.6199	11.2465	6.82649	13.2148	5.54721	7.87025	9.21204
ENSG00000142627	1969	EPHA2	EPH receptor A2	34.6211	5.22182	8.3189	2.10341	3.9373	22.9981	11.9712	4.30241	19.322	3.36527	4.05215	4.22945
ENSG00000058453	9696	CROCC	ciliary rootlet coiled-coil, rootletin	66.4586	40.1088	55.5691	52.7037	45.9314	182.651	31.2802	29.4285	22.2704	11.4223	16.7742	25.2049
ENSG00000117122	4237	MFAP2	microfibril associated protein 2	99.5534	29.6388	36.7962	13.4376	6.8763	7.7707	5.80236	1.16643	0.789729	0	0	0
ENSG00000117115	11240	PADI2	peptidyl arginine deiminase 2	1.18568	2.31494	2.25392	2.89534	4.95512	52.0925	43.4423	118.192	191.483	197.15	208.788	174.954
ENSG00000009709	5081	PAX7	paired box 7	0	0	0	0	0	0	0.997814	3.57578	1.63211	2.98297	1.05908	2.78987
ENSG00000159423	8659	ALDH4A1	aldehyde dehydrogenase 4 family member A1	16.5311	11.2179	12.1777	11.6183	14.8996	79.1983	55.6841	29.4285	184.533	45.232	82.8539	48.798
ENSG00000162482	22977	AKR7A3	aldo-keto reductase family 7 member A3	0	0.51196	0.615494	1.72895	1.4469	6.30552	3.43352	5.56445	3.63275	2.79795	4.13367	3.0984
ENSG00000158747	4681	NBL1	NBL1, DAN family BMP antagonist	6.1705	10.4619	12.8533	66.8923	39.8202	63.186	58.718	57.2316	135.991	57.2891	71.6988	66.9867
ENSG00000127472	5322	PLA2G5	phospholipase A2 group V	0	0	0	0.703511	1.25704	5.78224	10.7121	8.85341	36.3802	11.5524	6.31755	6.71175
ENSG00000162543	127733	UBXN10	UBX domain protein 10	8.04269	3.79694	4.17807	6.61517	16.5761	42.7781	8.14412	15.5078	5.94929	13.6443	5.81181	10.4567
ENSG00000158816	127731	VWA5B1	von Willebrand factor A domain containing 5B1	1.03403	0.433691	0	0	4.95126	40.842	2.98816	4.87607	1.10562	0.629709	0.510722	0.997392
ENSG00000162545	55450	CAMK2N1	calcium/calmodulin dependent protein kinase II inhibitor 1	72.7683	155.908	149.111	235.461	288.497	157.533	408.203	621.67	441.353	914.227	516.882	797.761
ENSG00000183114	163933	FAM43B	family with sequence similarity 43 member B	6.87624	5.00153	3.94265	31.418	16.8863	19.2828	24.7584	31.7614	43.0139	29.5545	22.012	22.9545
ENSG00000117245	57576	KIF17	kinesin family member 17	3.80838	3.93832	2.74319	18.9999	17.6966	31.4753	11.4639	19.0645	17.6373	21.5273	15.6536	27.1448
ENSG00000189410	400745	SH2D5	SH2 domain containing 5	2.03641	1.05404	0.795912	3.74992	4.36779	1.64833	8.09171	34.2854	14.2678	33.2904	33.9569	53.9845
ENSG00000117298	1889	ECE1	endothelin converting enzyme 1	45.6473	30.54	41.6309	20.7097	40.1028	274.748	65.4351	46.7529	82.8162	33.3672	39.0335	49.3094
ENSG00000162551	249	ALPL	alkaline phosphatase, biomineralization associated	16.0015	11.9055	10.1039	24.0491	22.8968	82.966	42.792	17.0758	108.298	12.6071	21.0485	25.8703
ENSG00000076864	5909	RAP1GAP	RAP1 GTPase activating protein	22.3669	42.044	47.3776	83.5978	72.8079	115.462	110.289	211.277	161.894	158.629	157.509	240.54
ENSG00000142798	3339	HSPG2	heparan sulfate proteoglycan 2	50.7821	26.2226	32.3538	6.62235	14.0623	203.216	29.5994	25.4512	14.0572	10.2129	5.61476	14.2225
ENSG00000173372	712	C1QA	complement C1q A chain	7.49102	4.83938	3.85443	17.978	10.7447	126.398	19.5304	36.5418	45.541	31.7359	15.9265	11.4925
ENSG00000159189	714	C1QC	complement C1q C chain	9.64583	7.09402	7.05889	16.6003	16.8769	129.956	19.0584	31.1877	54.7019	25.9512	9.89322	9.34102
ENSG00000173369	713	C1QB	complement C1q B chain	7.65717	5.96668	3.72833	17.8679	13.1149	155.806	16.65	33.1381	44.0669	36.9733	10.7807	12.5748
ENSG00000133216	2048	EPHB2	EPH receptor B2	215.759	153.407	172.716	97.9314	82.8329	42.3595	30.4879	28.5489	18.9008	18.516	10.733	20.6848
ENSG00000272796	---	---	---	36.1026	51.5045	40.0829	31.5201	30.1207	3.21817	8.62518	7.20893	2.05329	4.19991	1.16934	3.0513
ENSG00000004487	23028	KDM1A	lysine demethylase 1A	412.347	315.303	401.4	227.87	200.206	93.3269	92.3731	79.3365	56.0707	73.6431	51.8578	60.4325
ENSG00000007968	1870	E2F2	E2F transcription factor 2	34.2483	11.9992	18.1419	1.18306	2.64786	8.55562	1.24176	0.401558	0	0	0	0
ENSG00000117318	3399	ID3	inhibitor of DNA binding 3, HLH protein	66.8142	16.1784	13.1149	21.114	18.696	169.359	27.9738	28.8931	70.2859	27.9647	39.1386	24.0654
ENSG00000142676	6135	RPL11	ribosomal protein L11	813.148	675.657	900.4	1447.79	534.01	582.593	336.299	196.898	738.396	233.03	366.74	261.712
ENSG00000001461	57185	NIPAL3	NIPA like domain containing 3	15.9202	15.9479	13.5248	5.53239	12.4379	19.3875	68.4596	151.388	231.075	142.698	120.376	154.681
ENSG00000157978	26119	LDLRAP1	low density lipoprotein receptor adaptor protein 1	7.96639	3.31345	3.0247	2.49928	3.282	21.4806	16.0396	16.9228	32.3789	14.0662	16.422	23.7797
ENSG00000117632	3925	STMN1	stathmin 1	1599.42	2323.25	2078.06	2375.88	1762.88	288.667	728.398	487.129	693.119	516.887	666.861	531.373
ENSG00000158008	2134	EXTL1	exostosin like glycosyltransferase 1	2.70336	6.41882	3.14624	18.8429	12.4456	11.2767	36.9386	71.4965	58.5979	63.3156	67.6084	87.755
ENSG00000175087	149420	PDIK1L	PDLIM1 interacting kinase 1 like	43.7002	78.356	60.1712	29.634	49.6586	6.93345	17.3	15.4696	9.2135	11.577	10.4672	10.2271
ENSG00000198830	3151	HMGN2	high mobility group nucleosomal binding domain 2	368.235	166.534	240.017	125.249	119.325	82.809	69.7267	34.9738	69.5488	44.8513	43.3147	34.9156
ENSG00000253368	388610	TRNP1	TMF1 regulated nuclear protein 1	5.93353	16.2631	10.0191	53.278	32.467	15.8815	29.8362	49.2387	33.6424	55.498	50.1849	41.2489
ENSG00000142765	84958	SYTL1	synaptotagmin like 1	0	0	0	0	0	2.32859	2.00264	0.93697	1.31621	0.690738	4.27275	4.06361
ENSG00000142733	9064	MAP3K6	mitogen-activated protein kinase kinase kinase 6	3.5824	3.17352	4.47972	5.07339	2.97073	57.9532	9.91484	7.93556	12.583	6.02599	7.12502	8.89805
ENSG00000000938	2268	FGR	FGR proto-oncogene, Src family tyrosine kinase	1.68066	1.2681	1.21071	1.77899	2.06167	19.8061	5.82746	4.3789	17.7426	3.98546	3.81732	4.72215
ENSG00000126709	2537	IFI6	interferon alpha inducible protein 6	12.1766	11.8345	14.1143	53.3193	31.0931	218.495	50.9176	70.9229	1180.01	118.308	61.0751	61.8105
ENSG00000130775	9473	THEMIS2	thymocyte selection associated family member 2	2.92978	2.59942	2.07599	4.06537	2.75582	20.2248	4.62007	7.9738	8.47642	10.8941	13.0092	10.9902
ENSG00000180198	1104	RCC1	regulator of chromosome condensation 1	79.9769	39.6955	51.1114	26.7048	17.866	14.521	11.0037	7.01771	16.5843	4.82615	4.86603	4.74096
ENSG00000270103	---	---	---	0	0	0	1.62085	0	0.706427	1.09038	0	24.0604	0	0	0
ENSG00000162419	10691	GMEB1	glucocorticoid modulatory element binding protein 1	31.6738	30.9248	42.5141	24.8713	27.8985	7.4044	13.5436	9.77126	8.47642	11.7238	7.398	9.44254
ENSG00000159023	2035	EPB41	erythrocyte membrane protein band 4.1	170.625	88.1194	88.1857	17.8781	28.441	35.3475	17.8651	8.12678	5.7387	3.21836	3.38168	4.90236
ENSG00000162511	7805	LAPTM5	lysosomal protein transmembrane 5	15.2907	14.8102	14.4819	13.3984	31.3151	144.87	37.1893	45.9498	68.7064	55.1366	31.1329	25.726
ENSG00000084628	79570	NKAIN1	sodium/potassium transporting ATPase interacting 1	162.908	216.021	157.896	240.002	106.024	24.0447	32.2651	12.2571	16.5843	7.88343	8.80106	12.0674
ENSG00000121769	2170	FABP3	fatty acid binding protein 3	6.49936	17.9355	11.6888	93.3148	64.646	17.2944	60.1291	94.9781	71.3388	107.456	87.6423	123.991
ENSG00000168528	347735	SERINC2	serine incorporator 2	42.0801	29.0588	28.7968	14.4692	4.38171	44.9759	3.57118	1.58711	0.579134	0.863415	0.510597	1.55764
ENSG00000142910	64129	TINAGL1	tubulointerstitial nephritis antigen like 1	2.15381	0.721669	0.98937	0.777367	1.65176	67.8955	18.5395	9.12111	30.0623	8.69847	11.4718	14.7949
ENSG00000121764	3061	HCRTR1	hypocretin receptor 1	0	1.4011	0.857039	8.32224	4.87067	0.915739	1.11085	1.74009	0.473837	0	0	0.6911
ENSG00000084636	1307	COL16A1	collagen type XVI alpha 1 chain	7.38743	10.8957	11.7215	15.7705	15.274	82.3903	28.3967	35.7387	19.2167	18.4966	22.2341	45.7065
ENSG00000160050	79140	CCDC28B	coiled-coil domain containing 28B	17.942	30.7321	34.161	74.7812	31.0682	26.1378	23.9863	8.73868	18.4797	9.59904	12.472	8.41844
ENSG00000183615	84734	FAM167B	family with sequence similarity 167 member B	0	1.03796	0.933276	1.81862	1.18986	4.68335	0.67307	0.478046	6.15988	0.411245	0	0.627978
ENSG00000175130	65108	MARCKSL1	MARCKS like 1	1253.49	1728.05	1613.77	2511.14	1339.44	821.052	702.339	317.709	835.375	307.869	386.064	309.504
ENSG00000160062	653121	ZBTB8A	zinc finger and BTB domain containing 8A	5.5119	11.2532	11.0918	7.44586	13.2009	2.22394	7.56038	3.88173	1.42151	2.38022	2.15882	2.43235
ENSG00000121905	3208	HPCA	hippocalcin	27.9976	121.443	50.0204	809.145	502.735	93.7455	291.827	1044.22	228.548	1450.65	494.948	604.459
ENSG00000121900	113452	TMEM54	transmembrane protein 54	0.79053	1.85065	1.89805	16.0692	9.04702	65.2268	18.1481	15.0106	50.8059	24.4272	24.1378	27.9469
ENSG00000116544	58512	DLGAP3	DLG associated protein 3	12.2295	16.8385	12.499	52.9893	37.3406	23.94	89.2563	194.603	103.139	177.574	91.6641	152.124
ENSG00000020129	23154	NCDN	neurochondrin	56.138	141.398	94.3657	348.372	252.737	130.689	336.922	1418.21	98.8214	695.645	243.088	1118.26
ENSG00000116819	339488	TFAP2E	transcription factor AP-2 epsilon	0	0	0.485728	1.3768	1.16399	7.61372	3.32283	1.58711	0.684432	1.0531	1.12968	3.62884
ENSG00000142686	127703	C1orf216	chromosome 1 open reading frame 216	51.4011	126.894	100.201	202.149	138.091	36.2894	71.5768	201.831	63.1257	232.253	151.143	206.151
ENSG00000092853	63967	CLSPN	claspin	17.1098	6.81658	10.7915	1.37994	4.14898	0.811083	2.73698	6.29108	1.10562	3.39368	1.1721	2.31074
ENSG00000092850	27285	TEKT2	tektin 2	7.64648	6.92643	7.14497	17.3481	13.947	57.3776	4.578	3.19335	3.10627	0.976848	2.3796	2.51934
ENSG00000171812	1296	COL8A2	collagen type VIII alpha 2 chain	2.06913	1.4973	0.835466	0.886056	1.85736	6.14853	4.21122	21.3208	2.57978	2.92096	4.50401	3.63164
ENSG00000119535	1441	CSF3R	colony stimulating factor 3 receptor	0.959582	1.60227	1.42585	1.48603	3.90814	19.5445	4.02385	4.53187	4.05394	3.69816	0.693843	3.1218
ENSG00000163879	7802	DNALI1	dynein axonemal light intermediate chain 1	34.3915	33.1687	33.0532	47.0507	58.4344	169.621	27.6408	21.6268	27.9564	18.0742	18.9005	16.5944
ENSG00000169218	284654	RSPO1	R-spondin 1	27.0945	1.20252	1.03342	0.572632	0.576889	0	2.00198	0.554533	5.94929	1.96136	2.87697	1.45542
ENSG00000134690	55143	CDCA8	cell division cycle associated 8	56.2974	17.3087	22.8224	3.38816	4.047	3.53214	2.76045	1.28116	1.42151	1.30172	1.22951	1.15939
ENSG00000183317	284656	EPHA10	EPH receptor A10	2.1679	12.0668	6.33156	33.9271	21.1195	5.10197	9.40075	23.6919	9.00291	14.4337	15.8821	21.223
ENSG00000185668	5453	POU3F1	POU class 3 homeobox 1	4.1712	9.52753	8.18354	73.8827	41.4333	1.90997	8.2209	51.1891	9.00291	53.675	28.4365	21.9475
ENSG00000158315	54933	RHBDL2	rhomboid like 2	0	0	0	0	0.509387	0.444788	0.901431	3.1551	8.58172	4.34352	4.80414	4.27073
ENSG00000116983	51440	HPCAL4	hippocalcin like 4	24.0329	39.8854	16.1928	73.87	78.2348	43.9293	179.952	358.439	88.0811	362.688	226.227	329.113
ENSG00000116985	656	BMP8B	bone morphogenetic protein 8b	0	1.66424	1.25732	1.00669	2.27306	7.66604	10.0922	7.05596	15.8472	5.34485	5.58343	4.94122
ENSG00000116990	4610	MYCL	MYCL proto-oncogene, bHLH transcription factor	70.215	49.4509	31.9291	33.4803	18.8717	8.29398	9.27744	6.09986	3.63275	4.02097	5.64578	3.97104
ENSG00000187801	65243	ZFP69B	ZFP69 zinc finger protein B	8.30117	11.0619	12.5259	7.92987	7.56438	1.596	3.46951	4.79958	0.895026	2.83497	2.31482	2.53526
ENSG00000117013	9132	KCNQ4	potassium voltage-gated channel subfamily Q member 4	0.771456	1.6946	2.04595	6.29905	5.15083	17.3467	4.78171	4.64661	1.8427	1.58619	2.72674	4.75046
ENSG00000179862	163732	CITED4	Cbp/p300 interacting transactivator with Glu/Asp rich carboxy-terminal domain 4	4.89183	2.36246	3.03851	6.56418	3.45279	33.4637	5.89035	4.83782	9.63469	3.58098	6.42317	6.58269
ENSG00000171793	1503	CTPS1	CTP synthase 1	65.2808	39.8959	47.0791	52.5733	36.9178	9.44519	21.3189	25.9101	8.79231	21.8098	16.8609	19.563
ENSG00000204060	100132074	FOXO6	forkhead box O6	53.054	78.133	66.0711	75.3135	52.5392	23.94	19.1379	20.8619	16.9002	13.0329	13.0957	16.5893
ENSG00000127124	59269	HIVEP3	human immunodeficiency virus type I enhancer binding protein 3	5.11417	34.4051	25.38	35.0939	50.302	27.5507	55.7727	53.2543	14.0572	26.4632	18.1743	32.8032
ENSG00000066185	84217	ZMYND12	zinc finger MYND-type containing 12	0.9718	0.443054	0.455414	1.19954	3.85763	22.5795	2.59406	3.30808	2.79038	3.09787	4.68442	3.54276
ENSG00000065978	4904	YBX1	Y-box binding protein 1	1578.86	1351.68	1486.94	1901.26	1165.59	507.764	328.128	144.312	317.524	179.392	159.376	101.941
ENSG00000164007	149461	CLDN19	claudin 19	4.2248	0	0	0	0	0	0.473697	5.29675	0	0.421512	0.452186	0
ENSG00000177868	374969	SVBP	small vasohibin binding protein	36.1821	47.461	44.9553	79.7109	34.275	14.0501	14.2408	7.20893	11.6353	10.683	12.3458	11.0256
ENSG00000117394	6513	SLC2A1	solute carrier family 2 member 1	366.462	99.4893	108.14	53.7547	66.8033	1057	183.448	147.372	506.006	119.654	174.437	155.555
ENSG00000186973	440585	FAM183A	family with sequence similarity 183 member A	1.21049	0.86944	0	19.5615	16.1287	51.9878	6.90654	5.6027	13.5307	0.89265	4.98336	1.61373
ENSG00000243710	149465	CFAP57	cilia and flagella associated protein 57	2.882	1.66744	1.08563	4.82788	16.1299	28.0739	5.92252	7.78259	3.42216	4.44349	2.41114	3.50485
ENSG00000179178	128218	TMEM125	transmembrane protein 125	0.591566	0.746485	0.484644	1.79484	0.920322	1.02039	8.65602	28.3577	88.0811	26.7137	45.0197	30.9169
ENSG00000117399	991	CDC20	cell division cycle 20	123.61	30.6427	47.7941	9.77234	7.66425	4.52637	3.80489	2.39023	4.79102	1.51657	1.32991	1.05303
ENSG00000066322	64834	ELOVL1	ELOVL fatty acid elongase 1	12.829	10.3851	11.663	16.9772	11.9652	43.6677	36.5183	74.4795	240.235	90.4847	104.941	84.8062
ENSG00000066135	9682	KDM4A	lysine demethylase 4A	105.412	129.509	142.058	92.2394	86.1376	45.7608	46.7843	43.005	33.853	30.9559	26.1496	29.7747
ENSG00000198520	339541	ARMH1	armadillo like helical domain containing 1	1.03899	0.885019	0.925995	4.21525	3.48635	22.0562	3.63524	2.61969	2.57978	1.85107	2.78741	4.29915
ENSG00000142945	11004	KIF2C	kinesin family member 2C	84.3275	26.3798	38.8613	4.3542	6.23079	6.20086	3.23005	0.860482	1.00032	0	0.61379	0.537256
ENSG00000142937	6202	RPS8	ribosomal protein S8	1425.72	1239.98	1407.71	1936.24	850.066	888.921	492.705	240.113	828.32	324.958	474.631	318.08
ENSG00000222009	149478	BTBD19	BTB domain containing 19	0.479545	0.497151	0.497393	0.568707	1.18241	14.4687	1.4944	1.77833	0.684432	0.623825	0.634183	1.37228
ENSG00000117425	8643	PTCH2	patched 2	1.86906	13.189	9.12818	21.7065	14.0981	20.591	10.0359	5.98513	3.42216	3.43096	3.61143	10.5899
ENSG00000162415	57643	ZSWIM5	zinc finger SWIM-type containing 5	51.0537	62.8139	70.485	30.1404	33.8541	18.9689	20.8385	12.0276	14.0572	10.6727	10.588	10.3049
ENSG00000070759	10420	TESK2	testis associated actin remodelling kinase 2	1.38913	0.881589	1.15633	0.946168	1.09831	3.21817	5.21595	7.9738	19.0061	9.85533	10.2706	9.97508
ENSG00000132780	4678	NASP	nuclear autoantigenic sperm protein	336.295	162.657	227.998	93.8517	122.644	80.0356	86.5371	45.988	56.7025	35.4025	37.2715	45.6556
ENSG00000085999	8438	RAD54L	RAD54 like	22.14	8.43273	10.4408	3.52635	3.17111	3.11351	2.56182	2.04604	2.05329	1.11607	2.00489	2.44145
ENSG00000117480	2166	FAAH	fatty acid amide hydrolase	6.44089	15.3875	13.2907	41.896	25.8356	26.9227	33.2368	51.4186	72.4971	52.7491	53.8873	60.4756
ENSG00000162456	148930	KNCN	kinocilin	0	0	0	1.15311	1.9313	6.09621	1.78952	1.74009	2.68508	1.93098	2.65575	3.54838
ENSG00000142961	148932	MOB3C	MOB kinase activator 3C	4.37531	2.33102	2.61406	3.05326	4.84332	16.4048	11.7049	5.8704	23.5339	7.41442	8.42471	7.42871
ENSG00000159658	9813	EFCAB14	EF-hand calcium binding domain 14	48.1249	41.3281	39.4197	15.0573	48.5649	147.329	121.67	125.229	188.324	145.451	159.315	120.949
ENSG00000186377	260293	CYP4X1	cytochrome P450 family 4 subfamily X member 1	1.8171	8.57449	4.86835	14.6921	12.8546	1.596	10.3097	18.2231	6.58107	13.4187	13.5286	16.3155
ENSG00000123473	6491	STIL	STIL centriolar assembly protein	20.4322	8.82409	11.9595	2.73364	5.00251	2.27627	2.41126	2.04604	0.684432	2.43252	1.15988	2.02785
ENSG00000186094	84871	AGBL4	ATP/GTP binding protein like 4	1.85709	2.10818	1.82371	4.05889	5.84796	5.78224	5.08308	13.3279	4.15924	15.3805	8.13843	12.4026
ENSG00000162374	1996	ELAVL4	ELAV like RNA binding protein 4	191.234	209.476	203.029	53.721	88.7093	17.556	84.9071	94.481	35.8537	80.8705	61.1943	64.6884
ENSG00000142700	63950	DMRTA2	DMRT like family A2	179.969	60.3998	56.516	12.4009	15.5271	39.1675	7.40411	3.57578	8.16053	1.40113	1.44959	0.904471
ENSG00000085831	22996	TTC39A	tetratricopeptide repeat domain 39A	0	0.468512	0	3.19512	2.29049	0.758755	1.9491	9.77126	1.63211	6.93078	3.15809	6.12358
ENSG00000169213	5865	RAB3B	RAB3B, member RAS oncogene family	55.8926	29.6326	18.6543	43.4164	79.9793	10.2301	28.3618	104.845	21.428	48.2921	33.5846	76.0176
ENSG00000085840	4998	ORC1	origin recognition complex subunit 1	30.1625	8.17502	12.2904	1.41455	1.79218	1.38669	0.558881	0	0	0	0	0
ENSG00000116157	2882	GPX7	glutathione peroxidase 7	38.2191	19.5079	19.0526	18.9007	10.9785	12.8465	6.38331	3.46105	5.5281	2.58378	4.09516	2.87496
ENSG00000228929	---	---	---	18.5383	16.4258	14.4757	34.4734	10.7555	10.858	7.6403	3.19335	19.8485	4.9594	7.34958	5.85325
ENSG00000121310	55268	ECHDC2	enoyl-CoA hydratase domain containing 2	6.37503	5.14747	6.25748	7.11032	10.6539	54.2902	20.0754	8.20327	15.3207	7.86059	13.0854	15.2176
ENSG00000174348	127435	PODN	podocan	0.426355	1.20896	1.78989	3.16388	4.193	21.219	7.72268	9.69477	17.8479	5.67018	3.72727	7.06444
ENSG00000270172	---	---	---	16.167	36.9932	39.3357	24.7459	30.1546	7.7707	12.6601	9.69477	1.8427	6.16246	4.70761	7.17889
ENSG00000162390	26027	ACOT11	acyl-CoA thioesterase 11	0.870315	0.40201	0	1.12844	0.85949	3.42748	4.62726	7.40015	6.05459	4.71713	3.49426	4.44313
ENSG00000116133	1718	DHCR24	24-dehydrocholesterol reductase	288.32	264.061	202.027	159.395	141.19	40.685	192.171	339.623	386.599	385.731	199.985	347.717
ENSG00000169174	255738	PCSK9	proprotein convertase subtilisin/kexin type 9	9.77708	9.83413	3.23832	0.911155	0.78935	0	0.921045	0	0	0	0	0
ENSG00000162407	8613	PLPP3	phospholipid phosphatase 3	146.047	102.317	151.428	24.9192	145.373	447.849	258.53	117.465	316.997	177.684	269.784	145.949
ENSG00000173406	1600	DAB1	DAB adaptor protein 1	102.411	231.088	96.723	125.206	140.634	23.5737	56.0106	64.192	30.5888	57.5872	45.7481	33.9038
ENSG00000177606	3725	JUN	Jun proto-oncogene, AP-1 transcription factor subunit	244.422	115.095	299.75	69.3841	139.093	674.586	144.233	110.582	158.209	148.779	88.1917	99.9199
ENSG00000134709	51361	HOOK1	hook microtubule tethering protein 1	4.00318	5.80931	2.86845	4.39408	9.92317	1.38669	17.2403	37.192	7.21286	27.7386	18.1079	18.605
ENSG00000134716	1573	CYP2J2	cytochrome P450 family 2 subfamily J member 2	0.410079	0.538002	0.464179	0.5915	0.62302	2.9042	4.44283	7.85907	38.4861	14.7654	18.7526	10.7076
ENSG00000162598	127795	C1orf87	chromosome 1 open reading frame 87	0	0	0	0.463702	3.07457	15.2536	2.06514	3.57578	3.42216	0.825886	1.18147	0.959557
ENSG00000162599	4774	NFIA	nuclear factor I A	483.955	431.818	391.782	82.0054	243.477	231.891	178.314	75.7798	127.778	82.7943	110.309	70.8418
ENSG00000162607	7398	USP1	ubiquitin specific peptidase 1	162.299	105.676	110.341	28.949	47.9315	24.097	41.822	30.1551	31.8524	30.3105	34.2033	24.283
ENSG00000158966	57685	CACHD1	cache domain containing 1	301.908	105.003	85.6699	29.1258	56.4521	40.8943	41.7288	61.8209	30.1676	51.7094	52.0186	48.8612
ENSG00000162433	205	AK4	adenylate kinase 4	30.6046	18.6824	15.5749	16.7108	31.2889	87.9371	68.9735	50.0036	76.9196	72.3978	105.114	60.0988
ENSG00000116675	9829	DNAJC6	DnaJ heat shock protein family (Hsp40) member C6	76.1678	195.176	143.362	166.433	265.258	30.1671	247.139	592.337	116.827	580.304	258.091	439.478
ENSG00000118473	84251	SGIP1	SH3 domain GRB2 like endophilin interacting protein 1	13.026	47.7811	35.6011	33.775	61.1959	32.3648	79.0658	145.689	33.116	135.975	70.0215	98.5683
ENSG00000152760	200132	TCTEX1D1	Tctex1 domain containing 1	0.949568	1.24137	0.909214	6.11712	20.9519	31.7369	6.53525	8.96814	2.47448	3.72567	3.80076	3.90958
ENSG00000081985	3595	IL12RB2	interleukin 12 receptor subunit beta 2	0	0.541986	0	12.8114	10.3724	0.444788	2.74658	15.5078	1.8427	13.7725	5.01986	8.63515
ENSG00000024526	55635	DEPDC1	DEP domain containing 1	20.4144	6.76796	8.2228	0.616115	1.17956	0	0.756394	0.478046	0	0.432996	0	0
ENSG00000033122	57554	LRRC7	leucine rich repeat containing 7	20.0341	79.7904	55.5791	46.0991	78.8817	12.7942	52.0586	145.269	24.5869	108.404	62.6349	79.8054
ENSG00000050628	5733	PTGER3	prostaglandin E receptor 3	2.4432	3.89977	1.26348	3.2088	7.74498	2.32859	7.34592	23.233	1.8427	14.7185	14.6569	17.8387
ENSG00000172260	257194	NEGR1	neuronal growth regulator 1	60.2821	85.3365	48.1064	28.4542	141.267	18.4979	122.663	178.502	92.293	163.881	117.123	124.764
ENSG00000178965	127254	ERICH3	glutamate rich 3	4.08573	17.8796	11.2801	14.1954	58.4315	17.0851	49.0509	127.447	42.8033	82.1883	64.2302	73.0502
ENSG00000137968	204962	SLC44A5	solute carrier family 44 member 5	25.4322	68.177	43.286	28.33	66.8451	10.7534	11.8723	12.4101	4.36983	7.56905	6.73226	5.62077
ENSG00000117069	81849	ST6GALNAC5	ST6 N-acetylgalactosaminide alpha-2,6-sialyltransferase 5	41.2285	61.609	28.9601	67.1296	73.3118	9.91615	29.721	84.7671	10.5824	106.81	68.7729	71.5312
ENSG00000154027	26289	AK5	adenylate kinase 5	7.99238	47.1585	32.7903	180.114	218.834	18.4979	99.5118	441.313	161.473	528.235	397.277	481.361
ENSG00000180488	374986	MIGA1	mitoguardin 1	10.7372	9.52446	9.72586	2.86973	10.4032	6.04388	18.592	64.3832	21.3227	50.7409	26.9959	31.363
ENSG00000162613	8880	FUBP1	far upstream element binding protein 1	302.599	238.933	276.308	96.0199	132.393	77.2099	83.0661	76.2387	40.1709	53.8129	45.9996	54.7551
ENSG00000122420	5737	PTGFR	prostaglandin F receptor	5.71327	8.96162	4.99474	3.33166	6.89986	1.22971	7.74102	14.9342	0	13.3917	8.04603	4.90773
ENSG00000137959	10964	IFI44L	interferon induced protein 44 like	41.9723	12.9377	11.8396	3.89721	11.1561	21.8992	21.5689	16.9611	137.465	29.6013	16.7998	12.0763
ENSG00000137941	79739	TTLL7	tubulin tyrosine ligase like 7	18.3128	34.4832	31.1139	23.5115	50.8892	16.8234	63.7134	187.528	72.6024	155.688	99.6869	120.309
ENSG00000117155	117178	SSX2IP	SSX family member 2 interacting protein	44.1296	42.6135	36.7706	16.6861	35.0276	14.364	62.9839	137.161	37.012	131.917	92.3709	81.3908
ENSG00000171517	23566	LPAR3	lysophosphatidic acid receptor 3	0	0	0	0	0.841708	3.95076	2.09025	2.65793	1.21092	4.61977	1.92446	3.01597
ENSG00000162643	126820	WDR63	WD repeat domain 63	1.21336	0.641852	0	1.25455	6.88898	17.713	2.85166	6.71176	1.21092	1.31801	1.37886	1.77987
ENSG00000055732	55283	MCOLN3	mucolipin 3	0	0	0	0	0	0	0	6.2146	0	6.67609	1.40936	4.28138
ENSG00000153904	23576	DDAH1	dimethylarginine dimethylaminohydrolase 1	138.442	133.962	144.206	63.0334	190.533	406.196	379.644	270.975	301.518	347.611	569.092	252.689
ENSG00000142871	3491	CCN1	cellular communication network factor 1	31.4234	18.326	45.9375	2.45553	15.852	539.266	24.9027	25.3747	17.532	20.1923	22.7812	15.0707
ENSG00000171502	255631	COL24A1	collagen type XXIV alpha 1 chain	2.42504	2.14925	0.569419	10.1793	10.8537	2.32859	6.43133	10.6891	11.3194	7.8306	8.55737	12.4982
ENSG00000016602	22802	CLCA4	chloride channel accessory 4	0	0	0	0	0	0	0.539645	3.38456	12.3724	6.13101	7.41676	4.84314
ENSG00000117226	2635	GBP3	guanylate binding protein 3	0	0	0	0	0.738461	11.8523	4.03781	3.80524	15.9525	4.2777	6.00916	4.27495
ENSG00000117228	2633	GBP1	guanylate binding protein 1	0	0	0	0	1.07046	5.41594	6.24909	6.29108	25.7452	6.99532	5.82797	5.02913
ENSG00000162645	2634	GBP2	guanylate binding protein 2	0	0	0	0	0.410939	9.44519	2.69172	4.26417	19.322	4.57471	3.43359	5.51933
ENSG00000162654	115361	GBP4	guanylate binding protein 4	0.548531	0.52728	0.768801	0	1.30666	6.51483	6.4443	6.52054	16.7949	3.20709	2.81835	4.59197
ENSG00000197147	23507	LRRC8B	leucine rich repeat containing 8 VRAC subunit B	25.125	38.655	29.8121	13.2369	39.5944	13.4744	46.0929	113.067	41.0132	108.113	77.373	95.9454
ENSG00000171488	84230	LRRC8C	leucine rich repeat containing 8 VRAC subunit C	13.5901	7.67221	6.64343	3.62202	9.91957	20.1201	23.5626	30.9965	37.6437	22.0425	24.1523	19.2587
ENSG00000143032	343472	BARHL2	BarH like homeobox 2	5.69039	0.73758	0	0.407265	0	0.497115	3.34433	0	1.21092	0	0	0
ENSG00000233593	105378853	LINC02609	long intergenic non-protein coding RNA 2609	2.52613	0.562156	0	0	0	0.706427	4.44205	2.84915	6.26518	4.05003	5.43721	6.68614
ENSG00000097046	8317	CDC7	cell division cycle 7	46.3094	30.9556	26.6803	12.9597	17.2908	5.99155	10.7186	10.9951	5.4228	8.74759	5.59544	6.86884
ENSG00000069702	7049	TGFBR3	transforming growth factor beta receptor 3	11.4264	2.90247	2.90744	1.26171	5.82988	22.2655	24.879	24.2274	27.114	19.1387	27.0075	17.4705
ENSG00000154511	388650	DIPK1A	divergent protein kinase domain 1A	10.7087	22.528	16.8724	37.839	45.616	21.2713	33.0848	64.9951	52.9118	77.301	67.1663	55.5873
ENSG00000137942	54874	FNBP1L	formin binding protein 1 like	293.577	388.663	378.005	136.964	262.285	73.9655	97.2037	44.0376	27.9564	31.0536	44.7801	29.0368
ENSG00000198691	24	ABCA4	ATP binding cassette subfamily A member 4	3.01561	0.540761	0.48428	0.57535	0.639769	2.9042	3.53553	25.3364	0.789729	2.30827	1.65107	2.76936
ENSG00000137962	9411	ARHGAP29	Rho GTPase activating protein 29	52.1686	11.3928	12.608	5.06885	11.6303	33.3067	36.116	22.0475	33.7477	15.2778	16.4923	14.6164
ENSG00000117525	2152	F3	coagulation factor III, tissue factor	3.60144	2.17467	4.88244	3.80583	24.2923	162.661	68.9141	36.4271	54.386	47.046	58.2681	36.8511
ENSG00000143036	126969	SLC44A3	solute carrier family 44 member 3	1.65363	1.24709	1.46037	3.12378	6.27506	19.6491	6.68824	5.75567	8.05523	10.1284	12.5211	6.09307
ENSG00000152078	148534	TMEM56	transmembrane protein 56	5.87465	4.89816	4.18399	2.03153	7.57526	8.50329	30.6337	24.4186	19.8485	28.6625	28.9907	23.3352
ENSG00000228502	---	---	---	30.2026	30.6159	31.697	29.477	16.9913	6.04388	13.622	3.30808	15.9525	6.88935	6.48885	6.03823
ENSG00000117598	163404	PLPPR5	phospholipid phosphatase related 5	8.10936	65.4384	42.6749	44.1862	53.7361	9.18355	40.3687	45.3379	20.1644	48.4977	28.1783	26.2711
ENSG00000117600	9890	PLPPR4	phospholipid phosphatase related 4	17.9642	109.563	77.4624	86.8123	175.155	25.0912	132.132	515.544	55.3337	436.725	200.058	264.663
ENSG00000181656	54112	GPR88	G protein-coupled receptor 88	5.15473	5.46674	3.54699	9.21005	6.68292	1.33436	9.17745	30.92	5.6334	6.26536	9.49865	11.1157
ENSG00000162692	7412	VCAM1	vascular cell adhesion molecule 1	33.5818	18.76	27.0682	5.07906	23.2534	24.8819	25.951	10.6509	24.4816	7.30028	8.30365	6.21189
ENSG00000170989	1901	S1PR1	sphingosine-1-phosphate receptor 1	101.476	45.651	66.0218	10.5597	47.1073	265.957	143.748	49.2005	195.8	86.4212	134.526	70.1545
ENSG00000118733	118427	OLFM3	olfactomedin 3	33.798	21.0952	9.22887	7.78777	12.8205	2.85187	28.8028	52.7571	2.89567	34.6488	17.1229	30.8668
ENSG00000060718	1301	COL11A1	collagen type XI alpha 1 chain	81.1588	86.6928	107.953	11.186	35.2627	71.8201	46.3241	18.835	21.8492	7.67966	9.74012	10.2599
ENSG00000240038	280	AMY2B	amylase alpha 2B (pancreatic)	0	0.626122	0.783326	2.85187	2.9514	6.77647	4.69347	2.96388	4.47513	2.55928	2.99964	5.85956
ENSG00000162631	22854	NTNG1	netrin G1	18.4458	8.64444	7.89262	9.66623	17.7837	11.2243	21.9427	93.2572	27.7458	27.289	23.3347	23.4265
ENSG00000085491	29957	SLC25A24	solute carrier family 25 member 24	44.9029	25.6906	22.6967	5.62332	10.4434	8.08467	8.83325	10.4979	9.10821	7.56561	7.80676	5.16785
ENSG00000179902	127003	C1orf194	chromosome 1 open reading frame 194	2.50529	3.73067	2.20877	17.4934	17.2724	72.919	9.53426	12.2571	15.0048	4.29336	6.58345	5.45088
ENSG00000116299	57535	KIAA1324	KIAA1324	29.9698	50.1294	55.2316	37.0775	29.0098	7.45673	15.962	46.4087	6.26518	28.5669	14.7915	41.9696
ENSG00000134243	6272	SORT1	sortilin 1	163.851	202.374	195.458	118.283	195.07	197.198	247.255	832.775	475.785	830.865	409.96	625.96
ENSG00000156097	83873	GPR61	G protein-coupled receptor 61	0.574193	1.47193	0.493731	3.55416	4.48082	1.80531	4.81529	15.7373	2.36919	12.5923	6.40464	11.1734
ENSG00000065135	2773	GNAI3	G protein subunit alpha i3	241.267	192.132	204.916	81.812	104.545	67.1106	56.9351	31.8379	57.8608	31.7378	48.2192	25.7978
ENSG00000134184	2944	GSTM1	glutathione S-transferase mu 1	0	2.31481	4.66879	13.4593	4.89281	0.497115	6.73356	13.022	28.3776	16.3298	41.9912	2.22954
ENSG00000134201	2949	GSTM5	glutathione S-transferase mu 5	20.7303	8.21798	12.3996	10.2925	11.471	39.7954	32.0429	24.801	32.8001	38.366	81.9401	35.4524
ENSG00000184371	1435	CSF1	colony stimulating factor 1	5.7338	4.35251	5.08715	3.86752	10.7109	89.4546	28.8824	27.2104	80.8156	18.3418	17.2816	21.805
ENSG00000168710	10768	AHCYL1	adenosylhomocysteinase like 1	139.536	120.268	128.148	65.2396	130.415	702.476	323.246	279.121	355.009	460.713	598.835	340.714
ENSG00000197106	388662	SLC6A17	solute carrier family 6 member 17	4.64617	24.062	15.0546	37.1486	60.9902	29.0682	124.807	339.852	118.512	254.986	147.407	261.823
ENSG00000116396	3749	KCNC4	potassium voltage-gated channel subfamily C member 4	6.06502	14.4382	8.94974	36.7012	33.7828	25.1436	48.2586	59.5645	44.1722	55.2838	65.7234	89.5502
ENSG00000177301	3737	KCNA2	potassium voltage-gated channel subfamily A member 2	1.03771	3.70959	4.02677	2.67119	4.37905	4.5787	24.059	52.4894	10.5824	30.2663	16.857	33.1095
ENSG00000259834	---	---	---	5.84029	9.5667	8.30235	4.36504	13.602	2.69489	8.92099	13.1367	0.895026	16.0879	6.1806	8.4687
ENSG00000177272	3738	KCNA3	potassium voltage-gated channel subfamily A member 3	6.18184	6.71472	8.11716	1.83867	4.33875	1.38669	3.08957	12.9072	0	7.03055	0.854871	4.49124
ENSG00000064886	1117	CHI3L2	chitinase 3 like 2	0	0	0	0	0	3.32282	1.03769	2.08428	1.31621	9.75326	3.87664	1.9286
ENSG00000173947	128344	PIFO	primary cilia formation	6.62312	3.60971	2.41968	20.7045	34.0589	141.678	15.4169	24.2274	14.3731	11.3133	14.9212	10.4694
ENSG00000143110	128346	C1orf162	chromosome 1 open reading frame 162	0	0.528315	0	1.06556	1.40684	7.98001	1.73144	1.81657	2.15859	3.62858	1.0561	1.88164
ENSG00000197852	55924	INKA2	inka box actin regulator 2	10.6982	6.43613	9.07115	7.81482	15.6327	15.3059	46.4582	65.3775	29.1147	75.2858	40.6447	57.8909
ENSG00000171385	3752	KCND3	potassium voltage-gated channel subfamily D member 3	17.3064	56.8657	43.4319	26.6794	53.9508	24.4633	89.0504	122.896	25.7452	105.431	55.0239	97.2914
ENSG00000134245	7482	WNT2B	Wnt family member 2B	58.8382	13.1541	5.39803	2.80621	4.72642	4.42171	5.00984	6.52054	1.52681	2.32341	3.98646	5.42561
ENSG00000155367	333926	PPM1J	protein phosphatase, Mg2+/Mn2+ dependent 1J	0.451593	1.72263	1.00185	12.0773	7.1863	32.9404	5.88468	7.74434	8.68702	6.54538	7.01935	6.2366
ENSG00000155380	6566	SLC16A1	solute carrier family 16 member 1	163.103	64.4462	75.6477	25.5166	80.9071	363.391	94.5699	79.0305	196.327	66.3341	68.6402	45.517
ENSG00000081019	54665	RSBN1	round spermatid basic protein 1	135.36	95.8307	86.3296	15.3324	42.3919	25.5099	40.1071	28.2047	25.0081	31.1908	29.7951	20.5322
ENSG00000118655	64858	DCLRE1B	DNA cross-link repair 1B	34.3205	29.8287	28.224	15.3179	14.8644	9.23588	11.6627	5.98513	6.79167	5.92146	9.06697	5.17634
ENSG00000213281	4893	NRAS	NRAS proto-oncogene, GTPase	167.44	134.469	102.861	35.4214	71.7604	32.7835	48.1623	39.4101	35.2219	42.935	44.1267	23.8662
ENSG00000134198	10100	TSPAN2	tetraspanin 2	9.30716	24.342	17.8026	21.5215	19.8285	7.82303	5.02734	13.7104	1.52681	6.89879	4.92047	2.40557
ENSG00000118729	845	CASQ2	calsequestrin 2	0.728228	0	0	0	0.597354	0.601771	4.34232	3.30808	8.05523	2.92931	3.69301	3.75798
ENSG00000177551	4808	NHLH2	nescient helix-loop-helix 2	81.4976	39.4245	8.88583	15.1799	11.4573	1.02039	11.672	13.3662	2.68508	10.9096	6.39631	5.93322
ENSG00000163393	55356	SLC22A15	solute carrier family 22 member 15	6.37058	7.38446	4.47611	8.18412	12.09	9.23588	12.7311	32.2585	26.5875	28.3298	23.0819	24.154
ENSG00000143061	3321	IGSF3	immunoglobulin superfamily member 3	190.761	375.214	408.495	225.461	240.423	53.0867	37.3996	31.4937	7.10756	10.1529	8.3629	14.8987
ENSG00000134247	5738	PTGFRN	prostaglandin F2 receptor inhibitor	147.719	119.079	136.041	38.367	71.5812	102.955	57.3162	37.6509	42.3821	21.9038	24.3492	22.2454
ENSG00000183508	54855	TENT5C	terminal nucleotidyltransferase 5C	12.729	6.61756	5.38767	1.39033	5.51792	28.2833	4.10542	9.35058	2.05329	2.16676	1.76089	1.95761
ENSG00000155761	200162	SPAG17	sperm associated antigen 17	2.02249	0.899467	0.642327	4.49324	14.3576	38.5395	3.49593	8.96814	1.63211	0.930589	1.85867	1.82475
ENSG00000143067	90874	ZNF697	zinc finger protein 697	44.8156	55.3762	51.7372	27.106	32.8343	8.45096	14.4746	11.148	6.79167	7.83882	11.2158	8.10363
ENSG00000134250	4853	NOTCH2	notch receptor 2	272	141.145	211.245	23.5733	116.844	268.73	152.281	79.5659	99.032	73.158	88.8172	61.9663
ENSG00000272755	---	---	---	0	0.631572	0.60706	0.598298	1.9989	3.06118	2.68438	4.57012	8.79231	2.22616	4.2216	3.62626
ENSG00000181039	---	---	---	6.43748	15.7921	8.32214	31.0154	17.4046	8.92191	29.2088	45.2614	40.2762	49.7696	33.9768	51.3512
ENSG00000116128	607	BCL9	BCL9 transcription coactivator	114.704	134.702	133.695	59.4748	75.6698	54.9705	51.2011	39.5248	21.9545	33.2146	23.0889	34.7486
ENSG00000014914	10903	MTMR11	myotubularin related protein 11	5.44509	6.17697	7.6505	6.37534	11.1366	56.802	7.7421	5.14377	6.68637	5.06384	6.53806	6.6023
ENSG00000163113	---	---	---	30.7747	14.7024	20.1103	5.2307	14.0533	32.2078	28.6405	34.6296	74.2872	40.9779	43.4214	41.9088
ENSG00000143401	81611	ANP32E	acidic nuclear phosphoprotein 32 family member E	216.058	85.5977	99.4454	10.9211	53.2676	65.4884	107.377	56.1226	60.7038	75.7311	96.4116	60.0004
ENSG00000143382	54507	ADAMTSL4	ADAMTS like 4	0	0	0.5288	0.90668	3.18121	53.0867	2.42907	2.73442	1.42151	1.46496	0.916298	1.79934
ENSG00000143384	4170	MCL1	MCL1 apoptosis regulator, BCL2 family member	418.968	253.425	308.881	86.7004	138.099	438.691	147.58	83.6198	241.183	114.72	129.389	67.3242
ENSG00000163131	1520	CTSS	cathepsin S	1.91079	1.29146	1.2032	0.723021	2.82362	10.5964	4.80455	8.47097	6.79167	5.23381	2.31267	2.84702
ENSG00000143418	29956	CERS2	ceramide synthase 2	32.7337	19.6809	23.2133	23.8961	22.6848	65.4361	34.1864	55.7401	175.794	56.1522	67.9807	51.6376
ENSG00000213190	10962	MLLT11	MLLT11 transcription factor 7 cofactor	352.103	654.197	574.704	709.606	503.023	56.8543	223.428	249.636	67.3375	285.102	175.698	203.134
ENSG00000143434	10500	SEMA6C	semaphorin 6C	59.6431	75.039	87.4198	110.243	65.776	78.8844	42.7106	39.0277	22.4809	23.9446	16.7527	27.4256
ENSG00000143416	8991	SELENBP1	selenium binding protein 1	15.3575	7.10486	12.4143	7.96266	13.7173	66.4827	41.682	23.8067	78.7096	36.3816	78.1287	48.0134
ENSG00000143365	6097	RORC	RAR related orphan receptor C	0	0	0	0.426794	0	7.03811	1.10607	3.80524	0.579134	0	0.631974	0.531491
ENSG00000197747	6281	S100A10	S100 calcium binding protein A10	6.13257	9.43884	6.91478	106.164	90.7192	125.142	26.364	19.8293	41.645	18.1878	41.7868	23.4804
ENSG00000163191	6282	S100A11	S100 calcium binding protein A11	15.7573	6.63636	6.16199	11.1628	9.24874	73.3376	13.9924	13.2897	29.1147	13.9771	8.03677	10.6149
ENSG00000143631	2312	FLG	filaggrin	4.57252	11.6751	5.81611	3.52592	9.34672	1.64833	7.12698	4.45539	1.10562	3.55576	0.828554	1.1393
ENSG00000163220	6280	S100A9	S100 calcium binding protein A9	0.655531	0	0.455566	5.92567	4.28444	20.8527	2.84714	1.28116	50.1741	2.91067	1.02829	1.73421
ENSG00000143546	6279	S100A8	S100 calcium binding protein A8	0	0	0	3.95046	4.44253	12.2186	1.81756	0.63102	35.0113	1.61502	0.681183	0.800958
ENSG00000197956	6277	S100A6	S100 calcium binding protein A6	19.2481	7.49854	9.00282	35.4476	22.4892	55.1275	63.1015	37.0007	84.9222	66.0498	109.648	80.7586
ENSG00000196154	6275	S100A4	S100 calcium binding protein A4	1.99023	0	0.730208	1.10984	0.722727	1.80531	2.52269	2.23725	12.4777	2.45619	4.49149	3.22271
ENSG00000188643	140576	S100A16	S100 calcium binding protein A16	18.5291	7.51018	9.643	19.7274	24.6057	115.305	67.272	36.3506	132.622	56.7123	106.373	48.3536
ENSG00000189171	6284	S100A13	S100 calcium binding protein A13	2.92304	1.24837	1.76136	3.12553	2.96808	13.0558	12.6031	5.67918	38.802	22.5037	35.1144	26.4529
ENSG00000160678	6271	S100A1	S100 calcium binding protein A1	0	0	0	0.402302	0	2.9042	2.94032	2.58145	21.5333	13.3464	17.184	23.1635
ENSG00000143578	148327	CREB3L4	cAMP responsive element binding protein 3 like 4	18.0678	10.6147	13.7267	8.37455	5.08003	15.8292	3.49304	1.77833	2.26389	1.83358	2.24081	2.06542
ENSG00000177954	6232	RPS27	ribosomal protein S27	572.372	567.799	428.509	930.426	262.832	411.428	180.755	89.6623	733.658	160.148	294.289	163.725
ENSG00000231416	---	---	---	3.72482	5.02789	5.0557	13.3578	3.24085	7.87536	1.97455	1.47238	14.8995	1.59772	3.3127	1.54382
ENSG00000160712	3570	IL6R	interleukin 6 receptor	3.11556	2.9093	1.95079	1.52037	5.03898	8.97424	5.94503	5.71743	26.1663	7.22015	5.37163	6.21256
ENSG00000160716	1141	CHRNB2	cholinergic receptor nicotinic beta 2 subunit	36.862	72.0378	53.2932	84.3989	62.1172	9.0789	49.5741	128.059	30.4835	100.405	45.2961	85.1307
ENSG00000163346	57326	PBXIP1	PBX homeobox interacting protein 1	83.5928	53.9394	80.4944	28.6169	90.9524	391.805	184.74	176.514	304.888	168.004	224.41	150.809
ENSG00000160685	51043	ZBTB7B	zinc finger and BTB domain containing 7B	4.77477	2.02596	3.66204	2.47733	4.39886	50.104	20.3585	21.2826	46.3834	13.0244	13.126	17.0213
ENSG00000243364	1945	EFNA4	ephrin A4	14.0805	3.23526	3.56181	2.21074	2.04789	4.99732	1.68853	0.554533	2.36919	0.67838	0.865495	0.809901
ENSG00000185499	4582	MUC1	mucin 1, cell surface associated	0.80797	0.48926	0.814396	0.983143	1.14019	14.207	1.64824	0.554533	1.00032	1.05128	1.61251	1.3161
ENSG00000231064	---	---	---	1.03926	1.12616	1.11198	1.365	3.07881	16.4048	3.80228	1.16643	4.89632	2.35711	3.46954	3.38955
ENSG00000143630	57657	HCN3	hyperpolarization activated cyclic nucleotide gated potassium channel 3	18.0901	32.4919	35.5395	47.5035	31.9889	18.7072	10.2959	7.66785	5.31751	3.61775	4.83949	8.12793
ENSG00000254726	92312	MEX3A	mex-3 RNA binding family member A	380.951	355.536	387.008	123.85	153.197	64.1802	29.2094	4.30241	9.95058	2.33566	2.70766	1.9021
ENSG00000160781	79957	PAQR6	progestin and adipoQ receptor family member 6	4.02383	8.06171	12.2413	25.7646	43.7769	240.159	256.498	229.252	1356.91	220.24	404.583	469.174
ENSG00000183856	128239	IQGAP3	IQ motif containing GTPase activating protein 3	45.9184	14.1915	26.8116	2.97817	4.4424	7.35208	2.18352	1.01346	0	0	0	0.625163
ENSG00000132702	60484	HAPLN2	hyaluronan and proteoglycan link protein 2	0	0.869092	0.554607	2.56334	1.32321	11.9569	11.4679	40.7486	137.571	64.3917	51.2879	75.0131
ENSG00000132692	63827	BCAN	brevican	135.963	255.352	458.246	432.545	712.904	1687.76	967.697	321.228	1389.03	427.037	546.337	284.202
ENSG00000132688	10763	NES	nestin	729.897	379.023	591.421	157.006	383.599	359.833	135.983	58.6084	147.995	32.1533	36.7399	47.82
ENSG00000187800	375033	PEAR1	platelet endothelial aggregation receptor 1	3.49888	1.70265	1.74142	1.24698	2.11855	23.4691	7.10971	5.02904	5.6334	3.8231	2.52269	5.62674
ENSG00000160838	149499	LRRC71	leucine rich repeat containing 71	0	0	0	3.08534	7.60216	41.1036	3.54107	2.58145	1.8427	0.490169	1.25096	0.897815
ENSG00000183853	55243	KIRREL1	kirre like nephrin family adhesion molecule 1	73.8063	55.279	46.8424	23.2876	25.7019	41.9408	31.249	14.5135	18.9008	5.79774	7.87356	8.86089
ENSG00000163554	6708	SPTA1	spectrin alpha, erythrocytic 1	2.00971	0.539834	0.459706	0	0.591215	9.0789	0	0	0	0	0	0
ENSG00000213088	2532	ACKR1	atypical chemokine receptor 1 (Duffy blood group)	8.37309	11.9124	10.6269	11.481	14.5507	6.56716	20.9434	11.6834	71.2335	6.54597	6.68438	12.5268
ENSG00000158716	54935	DUSP23	dual specificity phosphatase 23	8.16556	10.4164	8.71703	75.3786	35.3049	23.1028	16.4617	25.0305	33.2213	29.1631	16.766	16.9523
ENSG00000213085	25790	CFAP45	cilia and flagella associated protein 45	1.53867	1.25585	0.765549	3.54844	16.0312	44.9235	5.00581	4.07295	4.26454	0	1.07711	1.08237
ENSG00000158710	8407	TAGLN2	transgelin 2	156.498	154.955	138.943	106.42	93.3644	368.415	73.4828	48.3591	195.589	57.4212	68.0093	52.0983
ENSG00000085552	57549	IGSF9	immunoglobulin superfamily member 9	89.6812	64.4161	60.2972	36.2854	23.2613	9.13123	1.86536	0.783995	1.00032	0.464688	0	0.455011
ENSG00000177807	3766	KCNJ10	potassium voltage-gated channel subfamily J member 10	29.4202	24.7241	44.5547	6.21967	44.0679	122.788	161.437	159.38	281.723	199.821	245.527	201.692
ENSG00000162728	3765	KCNJ9	potassium voltage-gated channel subfamily J member 9	20.2869	27.5035	15.9774	18.3715	22.5807	18.2363	82.3874	158.157	95.7678	90.7702	72.1019	134.051
ENSG00000018625	477	ATP1A2	ATPase Na+/K+ transporting subunit alpha 2	359.276	237.31	407.803	93.2423	441.578	1495.04	1358.37	558.338	1361.12	812.594	1032.93	682.851
ENSG00000132681	480	ATP1A4	ATPase Na+/K+ transporting subunit alpha 4	0.763412	0	0.838566	0.751679	0.979095	15.8292	0.545153	0.478046	0.579134	3.65424	1.97091	1.75589
ENSG00000171786	4807	NHLH1	nescient helix-loop-helix 1	156.167	118.009	75.7181	29.7816	13.9152	1.80531	7.0337	2.39023	1.52681	2.48123	1.6481	2.4935
ENSG00000162738	57216	VANGL2	VANGL planar cell polarity protein 2	316.185	252.993	238.103	78.6199	113.936	110.02	48.9468	23.1948	27.114	18.9942	20.7773	20.7291
ENSG00000158859	9507	ADAMTS4	ADAM metallopeptidase with thrombospondin type 1 motif 4	3.14936	2.69936	3.35743	1.7867	2.04402	18.4979	13.8143	35.5857	77.0249	26.5642	32.0642	28.4373
ENSG00000158869	2207	FCER1G	Fc fragment of IgE receptor Ig	2.29561	1.48227	1.64115	4.56055	3.31078	24.568	5.60781	8.35624	7.94994	10.2895	2.76364	4.25519
ENSG00000248485	654790	PCP4L1	Purkinje cell protein 4 like 1	0.67846	1.7658	1.27374	19.6066	14.1519	4.94499	26.8626	64.3067	9.95058	46.2113	22.7167	28.7367
ENSG00000188931	257177	CFAP126	cilia and flagella associated protein 126	9.81979	7.02527	6.98464	19.4003	28.3062	72.0294	15.7647	22.3917	15.2154	16.7671	13.7985	12.1054
ENSG00000203747	2214	FCGR3A	Fc fragment of IgG receptor IIIa	1.89386	4.19685	2.51984	4.45981	11.8073	49.947	4.11487	11.1098	13.5307	9.67795	2.68878	3.96393
ENSG00000162745	25903	OLFML2B	olfactomedin like 2B	6.56993	3.38733	4.22286	3.22425	6.48601	45.8131	8.92088	15.1254	12.7936	6.63909	3.11203	8.43138
ENSG00000198929	9722	NOS1AP	nitric oxide synthase 1 adaptor protein	9.48674	12.3849	12.9587	13.8724	23.0915	12.0093	29.1759	91.3067	30.5888	91.3678	42.0224	69.0815
ENSG00000152332	127933	UHMK1	U2AF homology motif kinase 1	47.2853	39.607	29.7897	11.2704	42.105	29.6438	81.0336	235.371	70.2859	313.992	199.545	169.464
ENSG00000162733	4921	DDR2	discoidin domain receptor tyrosine kinase 2	24.1325	15.9061	21.4962	3.01518	17.8664	23.94	34.1287	53.7515	22.2704	25.7354	30.6578	21.7959
ENSG00000117152	5999	RGS4	regulator of G protein signaling 4	1.31184	1.46915	0.87747	4.02959	8.40042	8.92191	37.1461	198.695	122.934	219.338	240.854	230.389
ENSG00000143248	8490	RGS5	regulator of G protein signaling 5	36.2098	27.256	26.7153	9.1223	22.6776	24.3587	217.146	197.777	396.286	235.71	314.69	188.258
ENSG00000143228	83540	NUF2	NUF2 component of NDC80 kinetochore complex	39.7562	15.9197	21.9217	1.85114	3.70564	0.968067	1.46241	0.745751	0	0.435214	0.794963	0
ENSG00000162761	4009	LMX1A	LIM homeobox transcription factor 1 alpha	26.6139	4.40897	0.485045	1.08125	2.39538	0.811083	0	3.91998	0	0.474526	0	0
ENSG00000143171	6258	RXRG	retinoid X receptor gamma	0.559774	3.27309	5.0403	22.787	15.8568	4.2124	5.46993	11.8364	18.585	8.69103	18.8687	11.938
ENSG00000188859	149297	FAM78B	family with sequence similarity 78 member B	5.70941	10.7049	7.6307	26.0389	15.4587	1.9623	5.54785	13.7486	3.42216	11.1186	4.52447	8.7857
ENSG00000143147	23432	GPR161	G protein-coupled receptor 161	53.0798	44.7086	57.7681	31.8077	26.2568	25.0389	11.0456	11.9894	5.10691	7.67334	5.1293	5.50111
ENSG00000143153	481	ATP1B1	ATPase Na+/K+ transporting subunit beta 1	44.4395	103.91	109.32	184.86	377.551	123.991	454.283	1372.28	368.803	1584.87	897.568	956.19
ENSG00000198734	2153	F5	coagulation factor V	1.94313	0.664674	0	0	0	1.49135	7.19866	109.434	0	5.51282	3.35327	4.48292
ENSG00000000460	55732	C1orf112	chromosome 1 open reading frame 112	15.6995	5.86534	7.46432	2.72966	3.37005	1.9623	2.03342	1.89306	1.63211	1.78276	1.44743	1.34483
ENSG00000188404	6402	SELL	selectin L	0.654875	0	0	0	0.57747	1.54367	1.5248	1.85482	9.52939	3.6722	2.02091	2.10739
ENSG00000007908	6401	SELE	selectin E	3.14934	0	0	0	0.506877	4.10774	0.947801	0	22.6915	0	0.568132	0.406324
ENSG00000116132	5396	PRRX1	paired related homeobox 1	11.2483	2.90369	2.2747	1.34768	4.41363	9.86382	24.6319	14.437	20.9015	18.0185	21.9407	12.136
ENSG00000197959	26052	DNM3	dynamin 3	33.4261	95.9311	70.1105	34.3339	89.3818	20.905	111.053	200.301	44.1722	195.266	127.65	136.887
ENSG00000120334	91687	CENPL	centromere protein L	16.9518	7.81484	9.52137	3.5093	4.21487	1.38669	3.09577	3.30808	0.895026	2.88535	2.23631	2.11605
ENSG00000234741	60674	GAS5	growth arrest specific 5	101.066	104.498	136.234	338.328	132.368	126.293	77.4591	28.4342	149.153	50.3496	95.9122	49.9266
ENSG00000235750	9674	KIAA0040	KIAA0040	2.51636	1.05978	0.794013	0.686557	1.70573	9.70683	7.48146	4.57012	22.5862	4.73541	6.26035	5.42134
ENSG00000116147	7143	TNR	tenascin R	7.2668	37.253	50.4936	29.34	80.2017	277.888	282.374	319.468	230.338	267.961	125.32	206.521
ENSG00000116183	60676	PAPPA2	pappalysin 2	69.5949	57.5043	36.7538	4.0793	6.24326	6.93345	7.39878	6.09986	1.948	2.69256	2.71227	4.27851
ENSG00000213058	---	---	---	0	7.65697	1.10864	0.824517	0.43514	0	0	3.91998	0	0.587867	1.4307	0
ENSG00000116191	55103	RALGPS2	Ral GEF with PH domain and SH3 binding motif 2	48.9325	50.6306	36.9697	13.5594	42.5266	7.24742	19.3332	38.6452	5.5281	29.9295	14.2458	12.3282
ENSG00000143340	148753	FAM163A	family with sequence similarity 163 member A	0	1.82452	0	11.7364	9.32975	0.497115	2.31443	7.51488	1.31621	2.81778	5.50112	2.38951
ENSG00000143324	9213	XPR1	xenotropic and polytropic retrovirus receptor 1	547.308	844.286	586.502	130.662	281.703	65.7501	92.5706	95.5136	41.9609	67.6421	55.3654	45.6151
ENSG00000153029	3140	MR1	major histocompatibility complex, class I-related	0.500756	0	0	0.42246	0.815215	5.04965	2.59279	6.06162	3.84335	6.66534	3.2718	5.22459
ENSG00000162783	51278	IER5	immediate early response 5	83.5999	104.794	91.6151	52.5569	40.8879	38.8012	23.312	24.8775	19.6379	26.3566	21.4348	21.9203
ENSG00000272198	---	---	---	5.80868	13.6056	9.40232	3.48972	5.36977	0.811083	1.779	1.43414	0.684432	2.70812	0.870793	1.73138
ENSG00000198216	777	CACNA1E	calcium voltage-gated channel subunit alpha1 E	77.8845	281.952	163	203.721	210.397	32.8358	120.276	281.378	35.5378	191.931	85.3384	179.54
ENSG00000135821	2752	GLUL	glutamate-ammonia ligase	404.81	220.884	257.335	160.346	279.657	1310.53	1607.38	637.159	4262.17	1722.57	3217.42	1119.45
ENSG00000143333	6004	RGS16	regulator of G protein signaling 16	37.0478	8.82416	13.4399	2.74799	4.17452	30.795	23.8862	182.633	6.37048	21.5848	3.97825	5.92162
ENSG00000261185	---	---	---	5.55438	5.27148	2.70475	12.1166	10.7058	1.9623	18.7408	31.2642	6.68637	23.2566	7.73786	12.7301
ENSG00000135824	85397	RGS8	regulator of G protein signaling 8	4.78553	2.97546	1.74793	3.66002	3.78778	0.654099	4.53426	20.3265	0.473837	8.06996	0.783436	2.23505
ENSG00000135838	80896	NPL	N-acetylneuraminate pyruvate lyase	3.14666	2.12148	2.52711	2.05349	4.92764	16.7188	7.34513	13.3279	5.31751	12.0388	8.24451	6.37502
ENSG00000135862	3915	LAMC1	laminin subunit gamma 1	121.774	67.3962	73.0333	26.0118	57.6978	284.272	97.2531	43.5787	54.386	25.5204	26.6283	29.0483
ENSG00000157064	23057	NMNAT2	nicotinamide nucleotide adenylyltransferase 2	87.5473	223.275	198.789	207.344	220.495	34.0917	142.818	256.711	37.3278	194.328	106.474	191.052
ENSG00000198756	23127	COLGALT2	collagen beta(1-O)galactosyltransferase 2	26.4306	13.293	12.653	19.0057	31.0068	26.1378	59.0659	73.1028	85.554	79.7061	59.6271	60.4425
ENSG00000143341	83872	HMCN1	hemicentin 1	13.2352	4.594	4.60445	6.44751	8.35661	6.72414	8.09434	4.57012	1.63211	0.897128	0.76592	1.78193
ENSG00000073756	5743	PTGS2	prostaglandin-endoperoxide synthase 2	0	0.525301	0.544944	0	1.04485	3.89843	2.46702	10.7273	6.58107	2.95406	3.23975	3.55189
ENSG00000116711	5321	PLA2G4A	phospholipase A2 group IVA	1.39462	1.02749	0.704487	0.43012	1.39185	3.11351	5.34208	4.68485	11.7406	3.14995	2.83218	3.67777
ENSG00000090104	5996	RGS1	regulator of G protein signaling 1	1.33733	1.0626	0.919226	0	1.4404	38.4349	0.980503	3.11686	3.42216	3.77272	0.872334	0.884158
ENSG00000000971	3075	CFH	complement factor H	25.3366	3.97069	5.42729	3.62571	5.77199	28.6495	17.7186	22.2387	25.0081	10.8578	10.9408	12.8064
ENSG00000066279	259266	ASPM	abnormal spindle microtubule assembly	113.286	40.5838	56.3019	2.97236	7.7482	2.01463	3.97798	0.975213	0	0	0	0
ENSG00000143355	56956	LHX9	LIM homeobox 9	78.8581	5.53902	2.8684	0.418301	0	0.811083	0.787843	5.94689	0.473837	1.20488	0.876944	0.821799
ENSG00000151414	140609	NEK7	NIMA related kinase 7	29.0756	14.487	12.8756	2.86011	12.8415	28.3356	38.6469	48.7415	129.673	70.7728	97.9743	53.7509
ENSG00000081237	5788	PTPRC	protein tyrosine phosphatase receptor type C	2.21886	1.516	0.993757	0.632385	2.79353	8.97424	6.47921	12.0659	4.15924	6.54863	3.20788	4.48581
ENSG00000118193	9928	KIF14	kinesin family member 14	20.7823	7.76353	12.4137	1.06158	2.43733	1.07272	1.21141	0.439802	0	0	0	0
ENSG00000163362	55765	INAVA	innate immunity activator	6.91874	4.08346	4.36687	2.19841	2.47601	11.8	4.59861	2.31374	15.426	2.30024	2.0548	0.985242
ENSG00000163395	91156	IGFN1	immunoglobulin like and fibronectin type III domain containing 1	0	0	0	0	0.902448	12.1662	9.20402	3.91998	1.10562	1.11571	0.77703	5.65608
ENSG00000118194	7139	TNNT2	troponin T2, cardiac type	0	0	0	0	0	0	0.751672	7.24717	0.473837	9.84282	0.860776	5.49382
ENSG00000174307	23612	PHLDA3	pleckstrin homology like domain family A member 3	6.03912	14.4546	9.15635	68.3043	28.984	74.3318	32.4947	42.9285	103.139	42.4166	57.6243	56.3959
ENSG00000159176	1465	CSRP1	cysteine and glycine rich protein 1	30.1473	24.5591	29.5819	41.0689	61.9067	333.774	308.344	310.405	1140.21	751.367	946.714	538.262
ENSG00000198892	149345	SHISA4	shisa family member 4	12.6898	26.8836	20.0942	73.4868	46.148	109.758	105.062	99.1849	236.234	134.682	178.174	140.316
ENSG00000163431	25802	LMOD1	leiomodin 1	1.18715	0.550412	1.25904	0.805122	1.13097	21.6376	11.1328	10.7273	15.1101	14.6193	10.9011	14.2069
ENSG00000170075	9283	GPR37L1	G protein-coupled receptor 37 like 1	0	0.741281	1.48825	3.05273	19.5174	245.235	271.623	104.501	474.206	168.76	235.459	141.572
ENSG00000133067	59352	LGR6	leucine rich repeat containing G protein-coupled receptor 6	0	1.32989	1.10245	6.76242	7.74867	9.13123	17.6725	5.52621	36.0643	3.63993	5.54275	3.59956
ENSG00000077152	29089	UBE2T	ubiquitin conjugating enzyme E2 T	44.6683	26.5415	26.5201	25.3763	16.1125	5.36361	9.68085	9.15936	6.05459	11.9078	11.1359	10.8558
ENSG00000236439	---	---	---	4.12982	4.15529	3.78073	6.67515	2.74298	11.4337	1.1177	0.783995	6.26518	1.11869	2.11678	1.15373
ENSG00000143858	127833	SYT2	synaptotagmin 2	6.2353	10.2087	12.0221	1.77676	3.02916	0.758755	5.25918	7.74434	0.895026	3.16316	3.92595	4.38951
ENSG00000117139	10765	KDM5B	lysine demethylase 5B	344.181	296.893	349.563	115.343	150.997	98.926	65.9781	55.243	46.8046	50.4523	42.6135	38.1137
ENSG00000228288	100506696	PCAT6	prostate cancer associated transcript 6	1.99956	2.29979	2.12179	6.48956	3.02292	12.3756	1.68876	0.860482	1.00032	0.645298	1.10905	1.34731
ENSG00000143847	8497	PPFIA4	PTPRF interacting protein alpha 4	4.42226	13.2216	13.0705	34.5457	39.6483	91.3908	123.47	144.121	36.9067	115.596	48.3615	122.894
ENSG00000163485	134	ADORA1	adenosine A1 receptor	10.8438	50.5097	34.2454	84.7337	50.4337	46.0224	66.7949	125.267	192.957	124.732	97.0333	114.12
ENSG00000133048	1116	CHI3L1	chitinase 3 like 1	0	0.425381	0	0.947292	1.93756	28.0216	5.74964	12.6778	15.0048	35.7231	9.87553	13.6656
ENSG00000159388	7832	BTG2	BTG anti-proliferation factor 2	50.0127	26.1629	32.8109	10.7306	26.1667	181.238	50.0339	29.5432	140.73	44.5546	49.9738	27.3655
ENSG00000122176	2331	FMOD	fibromodulin	9.29912	1.55293	3.03733	1.95046	4.19933	19.0212	18.0999	10.039	4.26454	5.23571	1.84637	6.32194
ENSG00000188783	5549	PRELP	proline and arginine rich end leucine rich repeat protein	6.29796	7.06461	7.76536	5.14983	9.63692	66.9536	39.4086	29.658	58.4926	39.9966	28.1591	43.1808
ENSG00000143842	9580	SOX13	SRY-box 13	12.0417	4.57672	4.1267	4.27934	9.62358	50.1563	24.0225	16.4257	25.0081	13.7679	13.5268	17.6854
ENSG00000174567	127845	GOLT1A	golgi transport 1A	0	0	0	0	0	1.28203	3.45022	2.16077	4.89632	2.96623	5.45929	4.87073
ENSG00000184144	6900	CNTN2	contactin 2	118.572	102.651	77.0422	64.456	59.5332	31.9462	181.31	451.792	961.521	360.578	323.256	410.436
ENSG00000163545	81788	NUAK2	NUAK family kinase 2	29.5849	5.32486	8.57041	2.02901	2.2523	11.2767	1.62196	0.745751	1.8427	0.645185	0	0.719567
ENSG00000162873	55220	KLHDC8A	kelch domain containing 8A	118.83	66.3228	78.748	144.873	100.6	49.8947	32.0444	26.4072	5.5281	24.0083	18.5645	23.1261
ENSG00000186007	93273	LEMD1	LEM domain containing 1	6.61107	5.24762	4.53365	7.10786	2.90126	0.601771	0	0	0	0	0	0
ENSG00000224717	284577	LOC284577	uncharacterized LOC284577	3.23549	2.52468	1.87534	3.10373	1.29743	0	0	0	0	0	0	0
ENSG00000117266	5129	CDK18	cyclin dependent kinase 18	18.393	6.98954	6.05802	2.86074	4.21816	36.9174	44.3913	74.0589	152.944	56.1317	45.2301	121.841
ENSG00000174514	148808	MFSD4A	major facilitator superfamily domain containing 4A	1.8188	2.21404	1.74885	5.45858	9.12044	8.24165	32.7832	111.958	20.7962	115.529	60.2208	119.982
ENSG00000158715	85414	SLC45A3	solute carrier family 45 member 3	6.99247	4.23084	3.4374	5.39506	2.47988	5.67758	4.69623	19.9441	28.2723	14.6103	20.4867	20.4178
ENSG00000136653	---	---	---	2.67845	1.30872	0.746995	1.06815	1.74387	6.25319	9.49602	33.4823	12.8989	27.7823	8.90516	20.5547
ENSG00000224114	---	---	---	0	10.6864	5.42125	1.85786	0.813817	1.54367	0	4.41714	0	1.25527	2.69876	0.622786
ENSG00000123836	5208	PFKFB2	6-phosphofructo-2-kinase/fructose-2,6-biphosphatase 2	9.30299	18.7017	13.7481	10.667	24.9109	29.7484	20.7455	55.7019	10.2665	44.2045	48.7435	40.9097
ENSG00000203709	---	---	---	0	0	0	1.72299	1.07926	4.31706	3.25574	2.00779	5.31751	3.29304	5.33301	8.3628
ENSG00000174059	947	CD34	CD34 molecule	29.1227	15.2908	14.5456	9.01792	13.8676	161.458	29.0039	21.0531	93.1353	11.0069	20.4901	30.8942
ENSG00000076356	5362	PLXNA2	plexin A2	120.015	438.406	474.373	185.885	200.757	149.946	81.1425	115.209	44.9092	56.6378	30.3635	74.8089
ENSG00000008118	57172	CAMK1G	calcium/calmodulin dependent protein kinase IG	5.67273	9.82148	5.13743	26.1534	21.4358	6.61948	17.4045	55.6254	15.0048	83.8001	52.8403	66.8669
ENSG00000123689	50486	G0S2	G0/G1 switch 2	0	0	0.966294	3.72039	1.95145	1.64833	2.80506	1.62536	11.3194	2.21761	3.32023	2.42367
ENSG00000117594	3290	HSD11B1	hydroxysteroid 11-beta dehydrogenase 1	0	0	0	0.722365	0.678498	0	0.580695	1.77833	0.895026	3.83866	7.93146	6.80963
ENSG00000143469	255928	SYT14	synaptotagmin 14	34.6069	16.6548	16.1736	5.00569	8.56134	1.54367	4.27165	7.40015	3.31686	5.57066	5.68368	4.4017
ENSG00000082497	56256	SERTAD4	SERTA domain containing 4	36.614	12.6665	15.4752	11.4484	11.2304	3.42748	8.39282	10.6509	3.00097	8.47873	4.42953	7.37282
ENSG00000143473	3756	KCNH1	potassium voltage-gated channel subfamily H member 1	0.840503	1.39116	1.03079	0.584318	0.874471	0	2.92345	11.8364	1.7374	9.13382	2.14255	5.8818
ENSG00000117650	4751	NEK2	NIMA related kinase 2	51.3114	14.8714	20.5766	2.72004	5.32811	2.53791	2.80795	2.5432	0	3.01641	1.22232	1.55199
ENSG00000143476	51514	DTL	denticleless E3 ubiquitin protein ligase homolog	72.4941	22.4676	31.8563	4.10197	7.03356	2.9042	3.77102	0.592777	0	0.813546	0	0
ENSG00000066027	5525	PPP2R5A	protein phosphatase 2 regulatory subunit B'alpha	18.606	17.3823	18.6605	13.5449	33.1046	61.4068	59.5137	46.0262	84.3957	54.6765	82.5293	49.045
ENSG00000117691	29937	NENF	neudesin neurotrophic factor	31.1758	31.5222	29.2988	91.3515	38.6824	83.4369	76.7164	67.2132	324.473	105.168	184.623	119.598
ENSG00000162772	467	ATF3	activating transcription factor 3	5.41782	1.7421	1.76125	0.585312	1.49605	35.6615	4.56491	6.94122	18.9008	10.9686	13.771	9.13253
ENSG00000143494	79805	VASH2	vasohibin 2	35.299	79.383	64.0459	34.3284	36.4717	3.11351	8.27128	2.00779	0.684432	1.3254	1.3789	1.33428
ENSG00000117707	5629	PROX1	prospero homeobox 1	26.8549	28.2965	31.2446	11.6222	81.9407	12.1139	39.9463	74.0206	23.5339	67.4508	20.5277	30.288
ENSG00000117724	1063	CENPF	centromere protein F	258.121	105.241	180.105	10.4946	31.2952	8.60795	16.11	5.71743	1.00032	1.04376	1.50738	1.47966
ENSG00000196482	2104	ESRRG	estrogen related receptor gamma	4.82141	14.549	5.43568	2.85301	6.86331	3.47981	26.2722	18.2613	7.84464	15.6179	12.9854	14.3095
ENSG00000092969	7042	TGFB2	transforming growth factor beta 2	5.26587	23.2977	27.1111	9.60229	49.8499	75.2214	50.348	36.1594	22.4809	26.6852	27.9908	21.1943
ENSG00000143498	9015	TAF1A	TATA-box binding protein associated factor, RNA polymerase I subunit A	17.67	10.4728	12.672	4.9425	6.10894	2.11928	2.65998	2.35199	2.68508	2.93131	2.70632	2.25575
ENSG00000143502	55061	SUSD4	sushi domain containing 4	7.5307	17.1193	10.8193	37.5408	35.6554	18.4456	63.2716	163.243	38.802	221.844	100.359	129.751
ENSG00000143786	149111	CNIH3	cornichon family AMPA receptor auxiliary protein 3	3.52456	8.31042	7.61628	18.1682	17.1327	10.4918	20.0183	53.2925	25.8505	69.6248	62.0364	52.9402
ENSG00000143815	3930	LBR	lamin B receptor	144.129	79.1943	84.0991	17.4882	40.2902	26.6611	24.1104	16.1197	19.7432	17.348	17.9363	13.3114
ENSG00000143819	2052	EPHX1	epoxide hydrolase 1	24.1566	22.3747	21.7061	50.9547	52.0099	107.769	78.6805	122.973	276.352	236.236	162.279	142.744
ENSG00000196187	9725	TMEM63A	transmembrane protein 63A	1.5179	3.16306	3.64369	2.43797	5.99784	40.5803	19.197	71.3436	115.458	52.2759	46.831	85.2301
ENSG00000163041	3020	H3F3A	H3 histone family member 3A	279.175	248.427	181.69	166.054	78.8507	93.3269	70.5198	30.6905	66.2846	32.1671	51.9993	30.4864
ENSG00000183814	286826	LIN9	lin-9 DREAM MuvB core complex component	26.6226	15.2905	16.0667	3.85038	5.44897	1.596	4.21304	2.19901	2.36919	3.32202	2.13718	2.06513
ENSG00000203685	375057	STUM	stum, mechanosensory transduction mediator homolog	14.4519	171.544	100.347	215.18	278.42	90.8675	252.604	518.947	92.293	425.782	193.148	338.573
ENSG00000143772	3707	ITPKB	inositol-trisphosphate 3-kinase B	49.3589	26.775	32.0135	15.1613	63.1221	581.233	106.057	119.569	280.459	118.135	116.606	137.107
ENSG00000143816	7483	WNT9A	Wnt family member 9A	4.9343	2.64465	2.8626	9.80965	10.2729	11.2243	4.58639	4.9908	1.63211	0.624777	2.88557	3.10545
ENSG00000154342	89780	WNT3A	Wnt family member 3A	15.4394	3.03567	0	0	0	0	0	0	0	0	0	0
ENSG00000143774	2987	GUK1	guanylate kinase 1	109.181	147.106	128.967	490.598	174.792	427.127	354.572	406.588	911.716	456.816	559.742	573.892
ENSG00000198835	57165	GJC2	gap junction protein gamma 2	1.37433	1.96688	1.98762	4.7492	2.32313	2.48558	13.7574	27.1339	127.146	21.4387	25.0649	26.3828
ENSG00000162931	51127	TRIM17	tripartite motif containing 17	0	0.467655	0	4.03387	4.4472	15.1489	4.67191	7.05596	4.15924	5.31889	5.08381	10.4867
ENSG00000183929	---	---	---	0.487216	5.40598	1.89137	7.42083	5.00728	1.22971	0.900947	0.93697	0	0.419166	0.654229	0.897624
ENSG00000177614	79605	PGBD5	piggyBac transposable element derived 5	47.4393	94.255	86.7213	113.068	85.7613	19.2305	82.846	172.613	69.4435	174.495	103.34	167.465
ENSG00000135744	183	AGT	angiotensinogen	1.14177	16.8123	12.7265	35.8649	251.78	1156.79	363.325	179.841	675.429	374.569	528.047	255.632
ENSG00000119283	440730	TRIM67	tripartite motif containing 67	43.1459	123.514	67.0419	203.02	210.881	20.0678	50.6138	20.9384	19.322	10.9806	9.40013	7.49577
ENSG00000135750	3775	KCNK1	potassium two pore domain channel subfamily K member 1	4.48409	5.94946	3.00859	4.85524	5.94123	4.16007	41.8293	72.1467	39.0126	64.617	46.6221	92.9969
ENSG00000183780	148641	SLC35F3	solute carrier family 35 member F3	2.73324	1.82862	1.69894	2.87986	3.57329	2.06695	12.8346	25.107	10.0559	17.6468	11.9284	18.6806
ENSG00000231768	100506795	LINC01354	long intergenic non-protein coding RNA 1354	0	0	0	0.459431	1.76679	17.5037	1.36567	1.70184	2.79038	1.74773	2.25353	1.87426
ENSG00000116962	4811	NID1	nidogen 1	115.149	52.4866	74.1652	18.0546	74.7448	337.96	96.7179	33.6353	28.0617	15.2069	10.8381	12.2191
ENSG00000119285	55127	HEATR1	HEAT repeat containing 1	67.8078	35.3775	41.3494	10.6128	20.2218	14.1547	15.1049	20.403	9.95058	16.7492	9.33717	10.0193
ENSG00000077522	88	ACTN2	actinin alpha 2	0.769256	4.60933	7.00885	18.7526	25.8662	35.0859	20.8036	49.8889	20.9015	40.4914	35.3817	62.7985
ENSG00000198626	6262	RYR2	ryanodine receptor 2	2.26066	11.0254	7.44531	9.424	20.0714	5.20663	51.1677	174.066	19.5326	121.11	43.0077	102.051
ENSG00000133019	1131	CHRM3	cholinergic receptor muscarinic 3	9.96628	7.40139	6.77026	19.6271	33.0404	5.99155	31.3945	65.607	27.9564	53.7799	29.0456	37.9285
ENSG00000180875	64388	GREM2	gremlin 2, DAN family BMP antagonist	12.2162	45.7286	15.6113	36.084	41.5625	7.7707	10.3484	30.3846	7.42345	15.9289	6.84217	16.553
ENSG00000182901	6000	RGS7	regulator of G protein signaling 7	6.81645	26.7433	16.8704	55.2052	50.6779	8.55562	40.0874	62.8152	27.9564	86.3211	46.5999	55.5034
ENSG00000203668	1122	CHML	CHM like Rab escort protein	77.4702	63.0946	57.9961	20.6128	45.2434	9.44519	24.0001	34.2472	4.47513	13.6557	10.5701	10.2492
ENSG00000174371	9156	EXO1	exonuclease 1	32.3701	9.06587	16.4864	1.23964	2.77117	0.968067	1.39638	0.401558	0	0.648561	0	0
ENSG00000180287	200150	PLD5	phospholipase D family member 5	1.2506	2.177	3.0264	1.42407	4.16938	3.68912	22.7244	17.4965	7.31815	11.7851	12.1063	12.3377
ENSG00000143702	9859	CEP170	centrosomal protein 170	147.287	253.495	289.285	74.0705	154.122	36.9697	71.5913	70.464	22.5862	50.1845	34.2354	42.1146
ENSG00000117020	10000	AKT3	AKT serine/threonine kinase 3	360.534	384.343	331.067	126.231	192.768	59.68	115.387	210.283	66.3899	144.754	108.011	124.686
ENSG00000162849	55083	KIF26B	kinesin family member 26B	52.8731	145.399	155.918	55.7007	91.0801	53.296	84.5769	37.9568	38.9073	20.6445	17.7148	15.479
ENSG00000135747	100533111	ZNF670-ZNF695	ZNF670-ZNF695 readthrough (NMD candidate)	15.3912	12.69	10.6816	3.79239	4.927	1.9623	2.4675	1.85482	1.7374	3.05051	2.24003	1.44953
ENSG00000197472	57116	ZNF695	zinc finger protein 695	4.81771	2.47491	3.04727	1.06056	1.65181	0	0.77974	0	0	0	0	0
ENSG00000188295	79862	ZNF669	zinc finger protein 669	10.9453	10.4912	11.5234	7.14637	7.16593	2.01463	2.5548	2.84915	0.789729	1.94313	1.04722	1.69916
ENSG00000196418	7678	ZNF124	zinc finger protein 124	5.93928	7.71155	6.79918	3.33431	3.77321	0.863411	1.69457	1.28116	0.895026	1.06776	0.819935	0.928608
ENSG00000162714	84838	ZNF496	zinc finger protein 496	79.9044	58.3399	65.0158	47.5936	33.3524	45.6561	23.555	19.3704	15.5313	15.5276	11.8879	16.5878
ENSG00000184731	642273	FAM110C	family with sequence similarity 110 member C	1.14413	0.71582	0.827246	2.66747	4.80205	4.36938	3.48584	10.4979	6.26518	7.01247	5.05904	7.19542
ENSG00000189292	285016	ALKAL2	ALK and LTK ligand 2	0	0.55937	0	5.59098	3.02191	0	2.34326	2.12252	1.42151	2.00111	5.91225	3.66067
ENSG00000130508	7837	PXDN	peroxidasin	56.6074	29.9241	37.181	28.4415	32.4198	107.665	22.5026	15.2019	7.63405	4.03385	3.69339	7.43956
ENSG00000186487	23040	MYT1L	myelin transcription factor 1 like	62.8078	182.084	165.163	107.531	189.59	26.9751	122.577	366.164	66.9164	270.611	168.078	211.343
ENSG00000176887	6664	SOX11	SRY-box 11	1206.69	1734.14	1742.96	412.127	585.504	102.537	88.0839	24.2656	22.7968	12.3274	17.8839	7.48876
ENSG00000242540	---	---	---	5.30271	10.4518	7.58284	3.7785	3.83709	0.758755	0.633027	0	0	0	0	0
ENSG00000134321	91543	RSAD2	radical S-adenosyl methionine domain containing 2	1.22466	0.96448	1.0114	1.86924	3.27876	8.92191	8.50997	11.4157	70.8123	13.6443	6.8673	9.46622
ENSG00000260837	---	---	---	0	1.1884	1.04665	1.65448	2.4842	0.863411	4.33162	7.82083	5.31751	10.5372	10.0903	9.30363
ENSG00000134313	57498	KIDINS220	kinase D interacting substrate 220	462.233	859.471	825.419	268.708	528.233	143.038	268.078	285.891	131.569	182.775	139.773	176.456
ENSG00000172059	8462	KLF11	Kruppel like factor 11	23.5473	33.3468	32.1645	16.4047	16.9632	15.9339	9.70808	4.60836	9.63469	5.03601	5.84973	4.81727
ENSG00000205795	192668	CYS1	cystin 1	0.531155	0	0	0.561443	0.709638	10.4918	4.73547	9.77126	13.1095	3.89207	10.3117	7.46424
ENSG00000171848	6241	RRM2	ribonucleotide reductase regulatory subunit M2	130.962	45.6407	61.4309	7.15371	10.4034	6.4625	3.90144	0.860482	0.684432	0	0	0
ENSG00000115758	4953	ODC1	ornithine decarboxylase 1	905.588	429.679	495.119	330.195	227.607	131.369	96.8297	63.0447	72.0759	75.889	61.2566	52.6372
ENSG00000162975	3754	KCNF1	potassium voltage-gated channel modifier subfamily F member 1	4.42939	10.829	14.548	92.9493	45.8701	72.3434	67.2045	133.91	168.844	137.846	95.2537	129.587
ENSG00000196208	9687	GREB1	growth regulating estrogen receptor binding 1	7.19935	2.34952	2.77629	2.06845	5.13627	8.29398	13.8968	19.7529	4.36983	15.4631	13.3916	22.4586
ENSG00000169006	23620	NTSR2	neurotensin receptor 2	0	0	0.712437	1.33659	2.08177	13.5791	18.7138	11.5305	56.3866	32.5701	83.7473	37.117
ENSG00000134323	4613	MYCN	MYCN proto-oncogene, bHLH transcription factor	150.272	114.734	111.276	76.5527	46.0943	16.0385	15.114	8.73868	8.79231	7.60827	8.24008	7.41485
ENSG00000163032	7447	VSNL1	visinin like 1	8.72128	32.5758	19.5498	67.8375	72.02	23.1551	260.086	427.927	140.835	396.822	357.1	536.495
ENSG00000115884	6382	SDC1	syndecan 1	52.1887	16.4091	15.5445	20.6348	11.2131	3.74145	3.73358	4.3789	2.57978	1.75359	1.47512	1.0988
ENSG00000119778	54454	ATAD2B	ATPase family AAA domain containing 2B	41.2829	35.2782	36.9344	6.90743	18.8027	8.76493	10.996	7.74434	3.73805	5.04581	5.75454	5.06229
ENSG00000163026	80304	WDCP	WD repeat and coiled coil containing	41.3764	34.8113	34.1184	22.7364	20.545	8.34631	10.5091	11.3392	9.00291	9.24754	9.25925	7.39141
ENSG00000119772	1788	DNMT3A	DNA methyltransferase 3 alpha	128.765	72.9529	88.5766	24.9809	35.2954	26.2948	26.2549	16.5021	12.0565	7.31718	5.36797	10.6548
ENSG00000157856	92749	DRC1	dynein regulatory complex subunit 1	3.47809	3.3954	2.9117	7.87698	15.6134	95.5247	6.93714	5.79392	3.94864	2.48855	3.89898	3.87208
ENSG00000115155	9381	OTOF	otoferlin	0	0.77413	0.656831	0.528767	0.913031	9.91615	3.13384	23.9214	8.05523	19.4735	3.81818	14.6158
ENSG00000115163	1058	CENPA	centromere protein A	15.8468	6.84829	7.4584	1.39624	1.37215	0.444788	0.574202	0	0	0	0	0
ENSG00000157851	56896	DPYSL5	dihydropyrimidinase like 5	684.221	920.657	875.234	1012.69	906.654	214.309	206.343	142.018	170.845	72.6151	75.8193	111.79
ENSG00000138080	11117	EMILIN1	elastin microfibril interfacer 1	14.6394	7.51054	8.88341	8.22386	10.6287	76.5296	25.0963	11.8364	19.322	6.40677	10.1254	10.1793
ENSG00000138028	10669	CGREF1	cell growth regulator with EF-hand domain 1	7.87151	16.7702	11.4261	39.5064	26.707	14.3117	32.9647	42.6991	32.1683	53.4641	46.4695	52.6526
ENSG00000138074	8884	SLC5A6	solute carrier family 5 member 6	41.2838	24.4164	21.5237	26.6351	20.9875	231.996	29.3013	35.5857	93.5565	23.6075	19.5669	34.1865
ENSG00000084774	790	CAD	carbamoyl-phosphate synthetase 2, aspartate transcarbamylase, and dihydroorotase	135.785	56.4296	68.2843	35.5606	33.9734	51.8308	31.2671	19.9823	22.7968	12.5035	12.5332	22.2653
ENSG00000115194	7781	SLC30A3	solute carrier family 30 member 3	0.537097	1.8236	0.814866	18.7578	15.4617	3.32282	25.7559	53.4838	21.5333	63.6442	27.5939	78.4026
ENSG00000189350	165186	TOGARAM2	TOG array regulator of axonemal microtubules 2	0	0	0	2.69871	6.615	52.7727	5.95539	6.94122	2.47448	1.59459	2.85451	4.81176
ENSG00000115295	79745	CLIP4	CAP-Gly domain containing linker protein family member 4	7.70898	8.68211	7.22753	6.79516	12.3702	10.4918	19.0943	45.4526	23.8498	60.9601	46.2022	52.477
ENSG00000213626	81606	LBH	LBH regulator of WNT signaling pathway	44.0871	43.5152	42.8613	21.9661	16.9524	12.6895	12.0669	11.5687	13.1095	9.31642	9.71889	7.35109
ENSG00000162949	92291	CAPN13	calpain 13	0	0	0	0	0	0	0	1.43414	5.00162	2.31024	2.45225	2.10422
ENSG00000013016	30845	EHD3	EH domain containing 3	21.4025	21.9609	18.2439	44.9677	35.0431	40.4233	75.5296	181.026	128.62	200.023	113.59	181.415
ENSG00000021574	6683	SPAST	spastin	124.731	149.1	128.604	35.9984	80.7209	17.9223	55.6548	60.7501	31.2206	50.6643	45.6968	39.6462
ENSG00000049323	4052	LTBP1	latent transforming growth factor beta binding protein 1	206.761	175.879	250.189	17.7141	81.5295	129.067	43.8134	33.4441	33.3266	22.7839	29.8425	19.4351
ENSG00000152689	25780	RASGRP3	RAS guanyl releasing protein 3	8.72138	5.53704	5.73791	3.64819	6.13139	14.2594	12.807	26.9044	64.0733	22.35	26.9098	31.1592
ENSG00000115808	6801	STRN	striatin	56.3388	43.7761	40.9946	11.5096	33.5945	28.2833	60.5144	107.522	78.8149	94.0423	84.0436	57.5872
ENSG00000163171	10602	CDC42EP3	CDC42 effector protein 3	53.2841	98.07	71.8018	59.0648	55.4196	21.062	23.0761	26.4455	8.47642	17.3647	17.8489	18.2781
ENSG00000138061	1545	CYP1B1	cytochrome P450 family 1 subfamily B member 1	40.0396	8.01847	4.46126	3.30894	14.1092	13.0558	36.6914	19.8676	10.0559	10.7577	18.9174	13.7136
ENSG00000213553	---	---	---	174.644	132.624	132.288	184.206	75.5074	79.9309	43.6586	29.6962	80.1838	32.8466	43.1054	25.4454
ENSG00000231312	728730	MAP4K3-DT	MAP4K3 divergent transcript	0	0	0	0.85003	1.17785	1.85764	1.94739	3.30808	1.8427	4.92739	2.9994	4.35694
ENSG00000152154	130733	TMEM178A	transmembrane protein 178A	33.9299	31.8279	24.9156	33.3514	35.444	44.4526	81.7985	99.7204	164.422	105.081	84.5618	105.957
ENSG00000183023	6546	SLC8A1	solute carrier family 8 member A1	22.5178	83.7621	76.1616	57.5247	133.583	48.0632	90.7597	275.718	67.1269	193.673	152.317	125.63
ENSG00000171126	170850	KCNG3	potassium voltage-gated channel modifier subfamily G member 3	0	0	0	0	0	0	0.665625	5.14377	0	8.55416	2.61233	4.91869
ENSG00000152518	678	ZFP36L2	ZFP36 ring finger protein like 2	136.309	48.0011	66.2719	13.499	44.6758	303.371	66.3027	38.7217	56.3866	30.5747	39.7489	31.7464
ENSG00000138078	9581	PREPL	prolyl endopeptidase like	99.3374	135.982	115.479	50.8112	133.067	60.4649	168.06	430.566	92.5036	453.073	256.783	331.795
ENSG00000171132	5581	PRKCE	protein kinase C epsilon	34.1864	129.602	68.5786	62.971	136.985	24.0447	97.369	314.688	42.8033	333.385	122.796	205.989
ENSG00000116016	2034	EPAS1	endothelial PAS domain protein 1	65.5372	31.1403	37.3314	18.4529	45.0647	554.912	302.863	217.09	482.103	203.327	253.721	219.262
ENSG00000119888	4072	EPCAM	epithelial cell adhesion molecule	1.93082	13.1239	5.9119	35.3769	29.7003	2.22394	4.993	9.96247	4.58043	9.87327	13.6033	10.3147
ENSG00000184261	56660	KCNK12	potassium two pore domain channel subfamily K member 12	5.96087	15.0507	6.15755	18.8819	12.288	13.7884	44.8277	30.1551	54.9125	22.4212	25.2283	31.8767
ENSG00000230979	---	---	---	18.3634	14.8594	19.3304	25.7331	9.56755	9.65451	4.69319	2.50496	9.63469	2.224	3.21307	2.73469
ENSG00000116062	2956	MSH6	mutS homolog 6	272.985	115.215	160.184	41.3888	55.6693	35.0336	38.743	32.7557	54.386	33.1861	31.3624	25.3754
ENSG00000170802	3344	FOXN2	forkhead box N2	44.8213	35.7384	38.6081	5.57703	17.0109	12.2186	30.1753	22.8506	54.8072	34.8898	39.7609	19.7364
ENSG00000243244	11037	STON1	stonin 1	26.8782	10.9709	15.7121	2.33549	8.17383	10.0208	5.49553	6.13811	4.15924	3.99042	3.9669	1.96421
ENSG00000170634	98	ACYP2	acylphosphatase 2	7.74503	11.3308	11.497	18.5206	16.3062	17.0327	40.7635	38.7982	59.5456	57.1736	55.2381	46.9871
ENSG00000115380	2202	EFEMP1	EGF containing fibulin extracellular matrix protein 1	3.23441	0.808878	0.636307	0.933927	5.10859	72.3434	29.9302	75.3974	36.0643	41.1799	40.3255	43.5108
ENSG00000055813	114800	CCDC85A	coiled-coil domain containing 85A	2.7888	4.66925	3.22018	7.5447	8.43974	4.2124	8.10803	31.4937	3.52746	12.3517	5.47403	11.2418
ENSG00000233723	400955	LINC01122	long intergenic non-protein coding RNA 1122	4.89974	10.4423	8.55447	8.46398	6.72678	0.811083	1.37942	2.77267	1.21092	2.16773	1.84161	1.81114
ENSG00000119866	53335	BCL11A	BAF chromatin remodeling complex subunit BCL11A	213.671	290.045	241.817	190.596	168.482	24.411	40.0115	85.8379	65.021	94.2419	70.8275	67.9125
ENSG00000115507	5013	OTX1	orthodenticle homeobox 1	68.0733	18.861	26.1226	4.92937	10.1648	26.1378	9.07614	3.23159	5.00162	2.30598	2.67102	2.70935
ENSG00000014641	4190	MDH1	malate dehydrogenase 1	143.665	148.296	129.896	224.639	172.68	81.5008	226.521	485.905	174.214	640.935	532.205	547.069
ENSG00000221823	5534	PPP3R1	protein phosphatase 3 regulatory subunit B, alpha	55.5955	64.2583	58.2531	55.2239	85.5893	32.8358	156.673	302.45	107.035	503.689	255.648	277.932
ENSG00000115977	22848	AAK1	AP2 associated kinase 1	20.2465	55.029	43.1791	37.7551	67.2884	15.0966	76.8177	257.59	39.2232	211.505	81.8816	147.207
ENSG00000196975	307	ANXA4	annexin A4	8.32539	5.41504	4.92622	3.93007	8.00507	16.3525	14.9708	30.9965	23.4286	22.3273	26.0515	21.9287
ENSG00000163235	7039	TGFA	transforming growth factor alpha	0.806637	4.90663	3.29691	20.9707	24.1584	9.0789	15.7499	32.335	56.9131	38.2486	40.3757	29.3287
ENSG00000144031	79998	ANKRD53	ankyrin repeat domain 53	1.79094	5.31238	4.53454	18.7304	10.609	12.4802	1.78125	1.08994	1.7374	0.764042	0.480078	0.970669
ENSG00000124374	400961	PAIP2B	poly(A) binding protein interacting protein 2B	41.0254	29.136	28.1098	13.9977	19.5391	18.8119	56.0168	140.412	604.774	138.443	133.874	114.051
ENSG00000135636	8291	DYSF	dysferlin	10.4374	2.56023	2.67013	1.85189	3.19799	5.62525	4.98609	10.8803	18.1638	27.4239	38.0878	37.6512
ENSG00000003137	56603	CYP26B1	cytochrome P450 family 26 subfamily B member 1	4.89379	28.3271	17.0727	40.0914	48.8029	17.8177	65.0898	42.6226	21.1121	21.5905	27.5668	36.9957
ENSG00000135638	2016	EMX1	empty spiracles homeobox 1	134.361	66.4186	42.4745	37.1112	13.5563	13.5268	7.14455	16.2344	11.9512	11.668	6.98511	14.1508
ENSG00000144040	94097	SFXN5	sideroflexin 5	55.8488	62.7988	74.288	53.8486	101.729	358.316	448.568	143.203	535.699	167.671	350.959	214.867
ENSG00000163013	150726	FBXO41	F-box protein 41	38.3445	92.9576	63.3311	194.505	152.705	87.4138	203.703	333.619	169.897	274.139	226.862	315.307
ENSG00000135625	1961	EGR4	early growth response 4	0	0	0	1.67653	1.44159	1.17738	10.793	29.0078	21.8492	31.8743	13.7501	15.5658
ENSG00000116127	7840	ALMS1	ALMS1 centrosome and basal body associated protein	78.7472	56.8194	72.3133	24.6373	44.1697	34.2486	28.2125	27.7458	11.7406	13.0484	8.10184	13.1676
ENSG00000163017	72	ACTG2	actin gamma 2, smooth muscle	3.28457	0.542356	0.836133	0.608144	0.940143	30.481	7.80104	4.64661	2.36919	3.53535	2.35597	4.14114
ENSG00000187605	200424	TET3	tet methylcytosine dioxygenase 3	115.63	98.7475	89.8778	33.4594	67.2309	35.6092	46.0003	36.9625	17.1108	19.4232	14.4374	20.0155
ENSG00000159239	---	---	---	9.97696	7.99973	7.19853	18.6696	12.2316	70.2503	9.97625	9.1976	12.4777	5.03666	8.88652	8.70229
ENSG00000114993	6242	RTKN	rhotekin	12.0855	8.2539	11.0362	7.7033	9.64001	46.3364	30.914	42.6608	153.787	67.7087	68.6704	52.8971
ENSG00000115318	84695	LOXL3	lysyl oxidase like 3	26.6488	19.7223	23.8347	14.376	13.1658	28.5972	6.24286	4.26417	7.21286	2.58957	3.60643	3.62641
ENSG00000159399	3099	HK2	hexokinase 2	170.849	18.4166	38.0046	4.78894	13.6528	76.4773	10.3111	9.65653	7.00226	6.54166	4.63933	4.56165
ENSG00000162951	347730	LRRTM1	leucine rich repeat transmembrane neuronal 1	7.43975	17.6171	10.619	111.333	60.5512	18.2363	34.8712	89.2416	31.9577	72.9918	32.7816	53.9808
ENSG00000115423	1768	DNAH6	dynein axonemal heavy chain 6	3.45609	3.72782	2.44216	6.71734	18.4878	30.6903	5.99886	10.1919	2.15859	2.89011	3.31007	4.89008
ENSG00000186854	129293	TRABD2A	TraB domain containing 2A	0	0	0	0	0	3.53214	0.771301	7.24717	2.15859	1.84292	0.999027	1.96642
ENSG00000152284	83439	TCF7L1	transcription factor 7 like 1	97.8592	27.7331	25.8401	6.89855	16.4692	59.1567	18.691	8.27975	12.0565	5.32241	3.42375	6.75481
ENSG00000042445	54884	RETSAT	retinol saturase	16.0683	15.3742	18.6007	18.1804	28.9901	56.0694	49.3744	53.675	97.2419	64.7082	81.2584	50.8589
ENSG00000168899	10791	VAMP5	vesicle associated membrane protein 5	12.2737	5.30961	7.0679	16.6795	9.93609	38.7488	21.7068	15.4313	58.3873	19.4162	23.9071	21.2187
ENSG00000068615	65055	REEP1	receptor accessory protein 1	159.711	335.693	251.422	289.167	338.403	68.1048	84.9889	141.1	49.0158	134.866	111.602	101.64
ENSG00000115548	55818	KDM3A	lysine demethylase 3A	256.875	87.847	131.768	29.4078	54.1716	123.625	45.0179	34.4767	36.3802	40.6676	40.636	35.5566
ENSG00000229604	---	---	---	0	0	0	0	0.706632	1.17738	5.414	1.6636	18.9008	3.08082	11.8268	3.19099
ENSG00000144115	55258	THNSL2	threonine synthase like 2	10.6658	7.55695	12.7124	3.43548	6.23499	22.3179	22.2634	6.52054	15.6366	20.1536	33.9066	28.2087
ENSG00000163060	150483	TEKT4	tektin 4	0	0	0	2.71257	3.5263	11.643	0.886204	0.669264	1.63211	0	0	0.885071
ENSG00000172005	4118	MAL	mal, T cell differentiation protein	0	0	0	0	0	2.32859	22.1671	82.5872	352.693	134.567	184.993	111.088
ENSG00000232931	---	---	---	0	0.667171	1.48244	5.63558	4.80858	9.02657	7.23155	1.74009	3.52746	0.587447	1.59247	3.09489
ENSG00000222040	---	---	---	0.556543	0	0	0	0	11.9046	0.806611	1.28116	1.948	0.693675	0.795607	1.1214
ENSG00000198885	150771	ITPRIPL1	ITPRIP like 1	6.73277	3.65388	4.85788	1.83182	1.41894	2.74722	1.16636	0.401558	0.789729	0	0	0
ENSG00000121152	23397	NCAPH	non-SMC condensin I complex subunit H	49.0362	16.592	23.7412	2.97667	4.22861	2.38092	1.77349	0.669264	0	0.722459	0.613788	0.682955
ENSG00000168754	51252	FAM178B	family with sequence similarity 178 member B	0	0	0	0	0	1.33436	1.56786	1.58711	7.63405	2.55898	4.17581	4.51104
ENSG00000168658	200403	VWA3B	von Willebrand factor A domain containing 3B	1.46725	1.1565	0.835192	3.16178	14.4067	74.1749	5.94268	5.56445	4.05394	1.15567	2.67507	2.09466
ENSG00000144191	1261	CNGA3	cyclic nucleotide gated channel alpha 3	35.9741	16.2218	14.6348	4.77295	11.5869	17.9746	4.0527	4.34066	0	1.77501	1.6529	1.97726
ENSG00000196872	343990	KIAA1211L	KIAA1211 like	2.58519	3.86384	2.36923	23.0395	24.2125	17.6084	33.9996	123.087	31.01	96.2479	59.5317	102.813
ENSG00000144218	3899	AFF3	AF4/FMR2 family member 3	107.635	124.948	124.876	33.0084	59.2674	18.7072	52.149	78.8393	24.6922	76.5613	30.7604	59.7841
ENSG00000170500	164832	LONRF2	LON peptidase N-terminal domain and ring finger 2	36.6904	73.6615	55.9749	36.4917	86.3562	29.0158	105.449	186.266	57.1237	128.037	117.932	159.616
ENSG00000170485	4862	NPAS2	neuronal PAS domain protein 2	2.29967	6.73454	5.52394	17.2103	18.8718	50.5226	26.5747	39.9838	37.2226	34.9049	32.9681	46.3713
ENSG00000175874	200407	CREG2	cellular repressor of E1A stimulated genes 2	2.26309	3.22502	1.44415	9.61288	16.4721	1.49135	14.4913	185.769	8.58172	123.355	30.8509	115.02
ENSG00000115594	3554	IL1R1	interleukin 1 receptor type 1	2.58553	0.623392	0.520007	0.419098	1.46218	5.78224	6.69571	9.73301	23.3233	7.45731	3.30352	5.40387
ENSG00000115616	6549	SLC9A2	solute carrier family 9 member A2	0	0	0	0.824869	1.55384	0.444788	2.52976	13.4426	2.68508	10.2871	4.41108	4.52505
ENSG00000234177	284998	LINC01114	long intergenic non-protein coding RNA 1114	0.974059	1.73699	3.63044	6.68013	7.78278	38.8535	5.40922	3.4993	6.68637	4.17769	5.09997	4.34099
ENSG00000115641	2274	FHL2	four and a half LIM domains 2	5.72693	4.25786	4.50301	8.49744	4.89279	26.2425	11.0011	34.3237	11.53	37.2817	12.4198	28.9962
ENSG00000119147	84417	ECRG4	ECRG4 augurin precursor	4.56098	6.29393	4.75872	10.4805	13.0128	25.7192	10.2788	47.8619	6.05459	12.1417	9.29026	11.872
ENSG00000144057	84620	ST6GAL2	ST6 beta-galactoside alpha-2,6-sialyltransferase 2	143.806	193.437	127.852	53.7003	101.763	42.7781	82.4905	38.9894	26.0611	29.6079	34.5988	25.4322
ENSG00000198075	27233	SULT1C4	sulfotransferase family 1C member 4	14.2798	8.46733	14.0654	2.67285	15.4676	46.6504	14.2339	6.06162	9.00291	10.1217	6.72078	4.29086
ENSG00000172985	344558	SH3RF3	SH3 domain containing ring finger 3	26.8047	103.994	116.14	143.814	109.339	74.7505	45.5299	41.6282	28.6935	26.2334	22.5809	26.2985
ENSG00000198142	65124	SOWAHC	sosondowah ankyrin repeat domain family member C	20.0817	33.2527	31.0101	19.9998	33.8854	19.7015	20.1717	7.66785	10.6877	5.03518	11.7055	5.69144
ENSG00000169679	699	BUB1	BUB1 mitotic checkpoint serine/threonine kinase	92.415	29.195	42.6385	4.20283	8.40684	3.21817	3.62502	1.24292	1.00032	1.04221	0	0.491735
ENSG00000153208	10461	MERTK	MER proto-oncogene, tyrosine kinase	5.5289	4.1058	5.77415	2.411	9.50038	26.0332	19.4085	16.9993	33.2213	16.3999	17.3034	15.4041
ENSG00000169607	150468	CKAP2L	cytoskeleton associated protein 2 like	36.6811	12.3499	19.5491	1.08226	2.77971	1.49135	1.372	0.516289	0	0	0	0
ENSG00000019169	8685	MARCO	macrophage receptor with collagenous structure	0	0	0	0	0	0.549443	5.43055	4.22592	0.579134	0.624905	1.18078	1.41719
ENSG00000144119	165257	C1QL2	complement C1q like 2	0	1.03375	7.26767	15.5413	24.9393	149.422	25.3045	24.1126	61.6515	34.2688	41.2886	34.6691
ENSG00000163075	200373	CFAP221	cilia and flagella associated protein 221	2.44483	2.20715	1.0455	7.74561	12.8733	24.6203	7.33841	16.005	5.4228	16.076	10.2264	10.8952
ENSG00000088179	5775	PTPN4	protein tyrosine phosphatase non-receptor type 4	61.6086	63.2781	55.4374	22.7457	45.0607	15.0443	55.2079	145.001	23.5339	85.7718	41.0738	48.1469
ENSG00000163083	3625	INHBB	inhibin subunit beta B	70.8375	29.9439	45.2146	26.8176	28.2239	36.8127	18.825	12.869	14.1625	6.11524	9.25703	7.61649
ENSG00000074047	2736	GLI2	GLI family zinc finger 2	45.2665	15.3044	18.6649	2.61129	7.21253	42.7258	10.4316	1.96955	4.05394	0.995004	2.67431	1.72636
ENSG00000155052	129684	CNTNAP5	contactin associated protein like 5	7.73579	9.78004	5.91977	3.50302	6.59863	3.53214	10.1414	46.3704	7.94994	15.6503	5.97789	10.9332
ENSG00000136717	274	BIN1	bridging integrator 1	50.5187	55.2241	53.7684	176.556	114.918	171.557	166.781	244.626	440.721	249.645	230.719	296.287
ENSG00000169994	4648	MYO7B	myosin VIIB	0	0	0	0	0.595277	6.8288	2.87491	1.35765	4.36983	1.91244	2.34572	1.93402
ENSG00000072163	55679	LIMS2	LIM zinc finger domain containing 2	7.28446	14.1646	13.1202	30.6884	27.8517	262.189	159.121	56.2756	202.118	36.4108	42.9702	43.06
ENSG00000144230	2840	GPR17	G protein-coupled receptor 17	0	8.75712	8.12859	2.98673	9.21574	176.581	133.269	54.2869	247.817	38.8064	43.2303	19.5826
ENSG00000136002	50649	ARHGEF4	Rho guanine nucleotide exchange factor 4	18.6587	50.961	39.0009	217.804	111.595	224.827	195.126	319.583	200.644	313.831	276.441	401.968
ENSG00000176771	344148	NCKAP5	NCK associated protein 5	54.528	80.7847	47.4727	25.7788	34.2775	15.0966	15.0039	8.96814	9.10821	6.84516	8.89483	6.35352
ENSG00000176601	80122	MAP3K19	mitogen-activated protein kinase kinase kinase 19	0.903217	0.950985	0.473507	1.68389	14.5292	30.2194	3.9162	5.52621	2.26389	0.511737	1.68747	0.995101
ENSG00000076003	4175	MCM6	minichromosome maintenance complex component 6	200.193	97.6369	114.281	59.8729	53.7082	21.219	27.6182	16.8463	17.0055	25.9265	27.4911	20.1571
ENSG00000121966	7852	CXCR4	C-X-C motif chemokine receptor 4	225.041	112.534	173.143	70.1373	84.0215	31.9985	13.0134	3.46105	9.4241	7.2286	11.162	6.59836
ENSG00000144229	80731	THSD7B	thrombospondin type 1 domain containing 7B	8.87253	18.5873	12.695	6.67227	10.9931	1.49135	6.06813	8.70043	2.57978	4.5031	2.76386	4.10276
ENSG00000144227	11249	NXPH2	neurexophilin 2	2.31362	2.85581	4.14756	3.51693	4.10364	0.601771	1.88556	11.2628	0	4.64016	0.674332	2.60937
ENSG00000168702	53353	LRP1B	LDL receptor related protein 1B	11.48	24.1023	14.5499	10.8316	34.5128	30.481	64.2137	81.7458	39.9603	46.7459	54.651	51.2951
ENSG00000150556	130576	LYPD6B	LY6/PLAUR domain containing 6B	0.643605	1.89949	1.23335	16.1505	8.46683	4.42171	2.65734	7.0942	3.21156	9.41159	8.2415	5.31102
ENSG00000115963	390	RND3	Rho family GTPase 3	150.797	60.3377	101.586	28.7672	56.4806	23.9924	38.0583	21.4356	16.1631	23.7647	19.9884	13.1364
ENSG00000183091	4703	NEB	nebulin	0	0	0.689157	0.899281	1.27181	2.38092	3.44677	9.08287	0.684432	2.3315	0.822475	2.65832
ENSG00000182389	785	CACNB4	calcium voltage-gated channel auxiliary subunit beta 4	11.4261	18.2685	15.6235	6.5815	23.2119	8.34631	46.8051	102.818	18.4797	69.2727	42.5745	51.4131
ENSG00000196504	55660	PRPF40A	pre-mRNA processing factor 40 homolog A	169.474	113.799	118.384	33.7206	61.8596	32.8881	47.3939	46.3322	26.3769	42.1942	32.4607	31.3101
ENSG00000177917	151188	ARL6IP6	ADP ribosylation factor like GTPase 6 interacting protein 6	80.0148	36.5793	43.5332	14.1428	19.4521	34.0393	16.8588	5.29675	19.4273	8.13026	14.5659	8.01915
ENSG00000162989	3760	KCNJ3	potassium voltage-gated channel subfamily J member 3	1.44684	9.76273	8.88719	8.18643	20.7073	3.32282	40.9442	105.419	16.9002	98.9754	37.33	59.2005
ENSG00000136542	11227	GALNT5	polypeptide N-acetylgalactosaminyltransferase 5	2.51679	1.07684	0	0	0	0.497115	0.59402	6.71176	0	1.96234	0.423892	0.481564
ENSG00000136541	57471	ERMN	ermin	6.29819	1.51013	0	0	0.752087	0	51.9139	296.637	1004.17	448.437	509.408	317.727
ENSG00000123612	130399	ACVR1C	activin A receptor type 1C	0.828707	1.78728	1.44699	2.27418	6.84355	0	4.79474	38.1863	1.7374	64.5986	15.3496	26.0993
ENSG00000144283	8502	PKP4	plakophilin 4	67.979	56.3025	54.0599	89.4973	112.403	60.4649	230.71	376.91	1172.12	332.737	248.561	318.31
ENSG00000115183	85461	TANC1	tetratricopeptide repeat, ankyrin repeat and coiled-coil containing 1	19.877	9.95677	13.8554	5.12559	14.2496	40.3187	30.6753	67.9781	40.4868	64.4737	27.5866	33.9151
[truncated: 21,219 more rows]

## Sheet: cpm_Inferior_temporal_cortex.
ensembl	entrez	symbol	genename	mean.2A	mean.2B	mean.3A	mean.3B	mean.4	mean.5	mean.6	mean.7	mean.8	mean.9	mean.10	mean.11
[truncated: 21,164 more rows]

[truncated: 11 more sheets: cpm_Medial_prefrontal_cortex., cpm_Mediodorsal_nucleus_of_th, cpm_Orbital_prefrontal_cortex, cpm_Posterior_inferior_pariet, cpm_Primary_auditory_(A1)_cor, cpm_Primary_motor_(M1)_cortex, cpm_Primary_somatosensory_(S1, cpm_Primary_visual_(V1)_corte, cpm_Striatum.xls, cpm_Superior_temporal_cortex., cpm_Ventrolateral_prefrontal_]
