# Supplementary material for: Transposable elements and their KZFP controllers are drivers of transcriptional innovation in the developing human brain
Source: HighWire-hosted journal article supplement (doi:10.1101/gr.275133.120), 2021-08-16
Supplement: Supplemental_Table_S2.xlsx [file Supplemental_Table_S2.xlsx]

## Sheet: Legend
Supplemental Table S2 – Gene expression values in counts per million (CPM) for DFC and CB from both Brainspan (BS) and Cardoso (CM) datasets with the Pearson correlation coefficient (core) for the expression of each gene between datasets.

## Sheet: DFC_gene_exp_cor
ensembl	entrez	symbol	genename	mean.1	mean.2A.BS	mean.2B.BS	mean.3A.BS	mean.3B.BS	mean.4.BS	mean.5	mean.6.BS	mean.7.BS	mean.8.BS	mean.9.BS	mean.10.BS	mean.11.BS	CM.mean.1	CM.mean.2A	CM.mean.2B	CM.mean.3A	CM.mean.3B	CM.mean.4	CM.mean.5	CM.mean.6	CM.mean.7	CM.mean.8	CM.mean.9	CM.mean.10	CM.mean.11	core
ENSG00000102195	9248	GPR50	G protein-coupled receptor 50		1.43639	0	0	0	0	0	0	0	0	0	0	0	11.9627	1.25017	0	0	0	0		0	0	0	0	0	0	1
ENSG00000112077	6005	RHAG	Rh associated glycoprotein		0.821017	0	0	0	0	2.66532	0	0	0	0	0	0	1.45636	0.409295	0	0	0	0		0	0	0	0	0	0	1
ENSG00000120586	---	---	---		0	0	0	0	0	0	0	0.419202	0	0	0	0	0	0	0	0	0	0		0	0.405656	0	0	0	0	1
ENSG00000128652	3232	HOXD3	homeobox D3		0	0	0	0	0	0	0	0	0	0.63159	0	0	0	0	0	0	0	0		0	0	0	0.442314	0	0	1
ENSG00000140254	90527	DUOXA1	dual oxidase maturation factor 1		0	0	0	0	0	0	0	0	0	0.670462	0	0	0	0	0	0	0	0		0	0	0	2.14241	0	0	1
ENSG00000141434	4225	MEP1B	meprin A subunit beta		0	0	0	0	0	0	0	0.522835	0	0	0	0	0	0	0	0	0	0		0	0.403422	0	0	0	0	1
ENSG00000153789	339145	FAM92B	family with sequence similarity 92 member B		0.416247	0	0	0	0	0	0	0	0	0	0	0	0.449556	0.421303	0	0	0	0		0	0	0	0	0	0	1
ENSG00000158516	1358	CPA2	carboxypeptidase A2		0	0	0	0	0	0	0	0	0	0.426583	0	0	0.429201	0	0	0	0	0		0	0	0	1.91389	0	0	1
ENSG00000161643	400709	SIGLEC16	sialic acid binding Ig like lectin 16 (gene/pseudogene)		0	0	0	0	0	0.486127	0	0	0	0.550321	0	0	0	0	0	0	0	0		0	0	0	0.428988	0	0	1
ENSG00000164853	340260	UNCX	UNC homeobox		3.06303	0	0	0	0	0	0	0	0	0	0	0	2.88563	7.17145	0	0	0	0		0	0	0	0	0	0	1
ENSG00000166743	116285	ACSM1	acyl-CoA synthetase medium chain family member 1		0	0	0	0	0	0	0	0	0	0.505592	0	0	0	0	0	0	0	0		0	0	0	0.53019	0	0	1
ENSG00000172680	4342	MOS	MOS proto-oncogene, serine/threonine kinase		0	0	0	0	0	0	0	0.572438	0	0	0	0	0	0	0	0	0	0		0	0.470665	0	0	0	0	1
ENSG00000176083	257101	ZNF683	zinc finger protein 683		0	0	0	0	0	0	0	0	0	0.41924	0	0	0	0	0	0	0	0		0	0	0	0.547425	0	0	1
ENSG00000176302	283150	FOXR1	forkhead box R1		0	0	0	0	0.465735	0	0	0	0	0	0	0	0	0	0	0	0	0.543626		0	0	0	0	0	0	1
ENSG00000178750	415117	STX19	syntaxin 19		0	0	0	0	0	0	0	0	0	0	0.400638	0	0	0	0	0	0	0		0	0	0	0	0.466588	0	1
ENSG00000180316	285848	PNPLA1	patatin like phospholipase domain containing 1		0	0	0	0	0	0	0	0.627187	0	0	0	0	0	0	0	0	0	0		0	0.43734	0	0	0	0	1
ENSG00000180745	119467	CLRN3	clarin 3		0	0	0	0	0	0	0	0	0	0	0	0.508551	0	0	0	0	0	0		0	0	0	0	0	0.643989	1
ENSG00000182489	402415	XKRX	XK related X-linked		0.708236	0	0	0	0	0	0	0	0	0	0	0	1.42389	0.479695	0	0	0	0		0	0	0	0	0	0	1
ENSG00000184454	400746	NCMAP	non-compact myelin associated protein		0	0	0	0	0	0	0	0	0	0.490389	0	0	0	0	0	0	0	0		0	0	0	0.699116	0	0	1
ENSG00000185155	83881	MIXL1	Mix paired-like homeobox		0	0	0	0	0	0.787861	0.409884	0	0	0	0	0	0	0	0	0	0	0		0.472341	0	0	0	0	0	1
ENSG00000198153	---	---	---		0.628536	0	0	0	0	0	0	0	0	0	0	0	1.64878	0.447205	0	0	0	0		0	0	0	0	0	0	1
ENSG00000213005	26255	PTTG3P	pituitary tumor-transforming 3, pseudogene		0.979438	0	0	0	0	0	0	0	0	0	0	0	0	0.476862	0	0	0	0		0	0	0	0	0	0	1
ENSG00000213406	---	---	---		1.0583	0	0	0	0	0.821387	0	0	0	0	0	0	0	0.507949	0	0	0	0		0	0	0	0	0	0	1
ENSG00000224109	347549	CENPVL3	centromere protein V like 3		0.545839	0	0	0	0	0.854913	0	0	0	0	0	0	0	0.452616	0	0	0	0		0	0	0	0	0	0	1
ENSG00000225210	---	---	---		0	0	0	0	0	0	0	0	0	0	0	0.637982	0	0	0	0	0	0		0	0	0	0	0	0.440984	1
ENSG00000231977	---	---	---		0.669274	0	0	0	0	0	0	0	0	0	0	0	3.68324	0.434694	0	0	0	0		0	0	0	0	0	0	1
ENSG00000232855	---	---	---		0	0	0	0	0	0	0	0	0	0.43681	0	0	0	0	0	0	0	0		0	0	0	0.782261	0	0	1
ENSG00000233221	---	---	---		0	0	0	0	0	0.486127	0	0	0	0.474644	0	0	0	0	0	0	0	0		0	0	0	0.40571	0	0	1
ENSG00000233509	100874094	ZNF197-AS1	ZNF197 antisense RNA 1		0	0	0.447722	0	0	0.519653	0	0	0	0	0	0	0	0	0	0.426908	0	0		0	0	0	0	0	0	1
ENSG00000233894	---	---	---		0	0	0	0	0	0	0	0	0.670737	0	0	0	0	0	0	0	0	0		0	0	0.401623	0	0	0	1
ENSG00000235590	149775	GNAS-AS1	GNAS antisense RNA 1		0.579685	0	0	0	0	0	0	0	0	0	0	0	0.927854	0.582062	0	0	0	0		0	0	0	0	0	0	1
ENSG00000237879	100874158	LINC00398	long intergenic non-protein coding RNA 398		0	0	0	0	0	0	0	0	0	0	0	0.756505	0	0	0	0	0	0		0	0	0	0	0	0.698252	1
ENSG00000243566	105375355	UPK3B	uroplakin 3B		0	0	0	0	0	0	0	0	0	0.411248	0	0	0	0	0	0	0	0		0	0	0	0.917478	0	0	1
ENSG00000254768	---	---	---		0.519742	0	0	0	0	0	0	0	0	0	0	0	0	0.731968	0	0	0	0		0	0	0	0	0	0	1
ENSG00000256018	---	---	---		1.71569	0	0	0	0	0	0	0	0	0	0	0	0.834014	0.443555	0	0	0	0		0	0	0	0	0	0	1
ENSG00000256464	---	---	---		0	0	0	0	0	0	0	0.453621	0	0	0	0	0	0	0	0	0	0		0	0.745472	0	0	0	0	1
ENSG00000260005	---	---	---		0	0	0	0	0	0	0	0	0	0.458709	0	0	0	0	0	0	0	0		0	0	0	0.473043	0	0	1
ENSG00000260132	---	---	---		0	0	0	0.418986	0	0	0	0	0	0	0	0	0	0	0	0	0.502107	0		0	0	0	0	0	0	1
ENSG00000260475	---	---	---		0	0	0	0	0	0	0	0	0	0.527994	0	0	0	0	0	0	0	0		0	0	0	0.497626	0	0	1
ENSG00000260509	---	---	---		0	0	0	0	0	0	0	0	0	0.447107	0	0	0	0	0	0	0	0		0	0	0	0.526901	0	0	1
ENSG00000261730	---	---	---		0	0	0	0	0	0.720809	0	0	0.599964	0	0	0	0	0	0	0	0	0		0	0	0.418781	0	0	0	1
ENSG00000266184	---	---	---		0	0	0	0	0	0	0	0	0	0.426568	0	0	0	0	0	0	0	0		0	0	0	0.567267	0	0	1
ENSG00000268262	---	---	---		0	0	0	0.420631	0	0	0	0	0	0	0	0	0	0	0	0	0.485738	0		0	0	0	0	0	0	1
ENSG00000269993	---	---	---		0.541735	0	0	0	0	0	0	0	0	0	0	0	3.58539	1.15168	0	0	0	0		0	0	0	0	0	0	1
ENSG00000272384	---	---	---		0	0	0	0	0	0	0	0	0	0.624953	0	0	0	0	0	0	0	0		0	0	0	0.450861	0	0	1
ENSG00000213931	3046	HBE1	hemoglobin subunit epsilon 1		31.7151	1.56557	2.20477	1.03729	0.512935	0.586705	0	0.499817	0.557786	0.594813	0	0	274.327	53.9684	3.48409	1.85689	0	0		0	0	0.415287	0	0	0	0.998746
ENSG00000187686	---	---	---		0	0	0.419969	0.460656	0	0	0	0	0	0	0	0	0.606166	0	0	0.46285	0.447841	0		0	0	0	0	0	0	0.997603
ENSG00000167656	8581	LY6D	lymphocyte antigen 6 family member D		0	0	0	0	0	0	0	0	0	0	0.637743	0.625672	0	0	0	0	0	0		0	0	0	0	0.792866	0.683311	0.997459
ENSG00000187772	389421	LIN28B	lin-28 homolog B		11.9961	2.77524	1.187	0.610988	0	0	0.485835	1.01999	0	0.63606	0.681963	0.560215	108.729	14.8201	4.24313	2.88557	1.13827	0		0.694848	1.69194	0.59086	0.821012	0.95839	1.17487	0.994878
ENSG00000130656	3050	HBZ	hemoglobin subunit zeta		2.55672	0	0	0	0	0	0	0	0	0	0	0	33.3961	5.56836	0.57831	0	0	0		0	0	0	0	0	0	0.994592
ENSG00000221818	64641	EBF2	EBF transcription factor 2		22.6062	0	0	0	0	0	0	0	0	0.55861	0	0	16.0437	19.712	0.828274	2.07931	0	0		0	0	0	0	0	0	0.993276
ENSG00000186891	8784	TNFRSF18	TNF receptor superfamily member 18		0	0	0	0	0	0	0	0.720274	1.67408	1.829	1.17357	1.82834	0	0	0	0	0	0		0	0.460294	1.2357	1.30423	1.07467	1.53792	0.991663
ENSG00000161944	433	ASGR2	asialoglycoprotein receptor 2		0	0	0	0	0	0	0.593649	1.62464	1.76014	1.48091	1.70303	1.32018	0	0	0	0	0	0		0.433582	2.15375	2.39017	2.0009	2.26732	2.08151	0.99101
ENSG00000119772	1788	DNMT3A	DNA methyltransferase 3 alpha		110.644	89.5458	80.5511	53.6048	40.8512	14.9694	20.904	14.3217	12.1168	6.91753	10.3445	12.1104	150.19	120.072	102.518	84.1742	44.8872	51.1629		26.873	16.6152	11.0651	12.6888	12.4382	12.6032	0.99037
ENSG00000165606	644168	DRGX	dorsal root ganglia homeobox		0	0	0	0	0	0	0	0	0	0	0	1.25033	0	0	0	0	0	0		0	0	0	0	0.484152	3.43422	0.99003
ENSG00000168405	8418	CMAHP	cytidine monophospho-N-acetylneuraminic acid hydroxylase, pseudogene		0	0	0	0	0	1.3578	0.750551	0.950438	1.83085	1.62151	1.55416	2.91272	0	0	0	0	0	0		2.06417	3.73501	5.37021	4.10199	5.42983	9.11585	0.989424
ENSG00000108468	10951	CBX1	chromobox 1		342.008	287.569	324.033	254.276	221.823	127.248	100.245	71.6526	87.3442	56.8195	96.0303	97.2447	401.112	358.145	331.905	361.233	284.912	294.438		165.497	114.871	125.887	114.414	124.042	128.262	0.988375
ENSG00000170631	7564	ZNF16	zinc finger protein 16		14.3919	14.8527	15.0115	15.7213	12.2864	13.1589	8.35435	7.80863	6.39657	6.85033	6.99603	7.05967	16.9199	15.0729	17.5301	17.9933	17.5974	14.6864		10.2368	8.59917	7.21169	7.87475	7.39154	8.66524	0.988179
ENSG00000159023	2035	EPB41	erythrocyte membrane protein band 4.1		126.574	91.4819	83.9295	69.0335	68.0742	25.5971	6.26109	5.06688	2.47535	4.91296	7.69912	7.9819	355.586	170.632	127.762	132.653	106.046	79.6807		31.0635	22.821	6.30635	12.6984	17.059	17.9485	0.987519
ENSG00000213937	9080	CLDN9	claudin 9		0	0	0	0	0	0	0	1.12904	1.4283	1.87027	2.65159	1.73158	0	0	0	0	0	0		0	1.71614	1.37349	2.33385	3.0242	1.75868	0.987131
ENSG00000179151	80153	EDC3	enhancer of mRNA decapping 3		71.7303	84.9944	89.3332	89.0538	78.2649	67.6722	41.6592	34.3213	37.9291	27.1381	29.9765	32.5724	75.4038	74.2338	81.897	83.7397	91.5532	81.0741		52.2641	39.6958	36.1973	34.5397	33.2218	34.0994	0.986885
ENSG00000071246	22846	VASH1	vasohibin 1		111.232	154.679	131.59	201.061	174.551	86.8155	79.067	45.3252	37.7866	23.1859	32.6216	31.5885	135.866	213.53	255.242	217.553	315.799	299.113		171.13	70.4941	72.9132	76.3097	64.9492	54.7312	0.986557
ENSG00000215452	---	---	---		3.71293	3.84375	3.20723	1.54039	1.5955	0.452601	0.791651	0.684309	0	0	0.710171	0.478532	6.29483	6.12455	5.41445	4.97445	3.33649	3.26182		2.06823	1.93304	1.0516	0.931761	1.50837	1.1767	0.986557
ENSG00000138435	1134	CHRNA1	cholinergic receptor nicotinic alpha 1 subunit		0	0	0	0	0	0	0	0	0	0.674047	0.559493	0.853473	0	0	0	0	0	0		0	0	0	0.421601	0.45243	0.757188	0.986436
ENSG00000235531	100132891	MSC-AS1	MSC antisense RNA 1		0	0	0	0	0	0.486127	0.630217	2.29289	1.55221	1.59364	3.51275	4.61872	0	0	0	0	0	0		1.73227	3.69192	4.25205	2.63704	6.5619	9.14698	0.986358
ENSG00000269343	100293516	ZNF587B	zinc finger protein 587B		4.35594	4.77776	3.68107	6.55105	4.33793	2.06185	2.27792	1.47895	1.72107	0.903397	1.60455	1.4939	9.7761	8.79301	8.96301	6.3411	13.8114	8.00468		3.31341	2.083	1.86717	2.39809	1.84641	1.91737	0.98566
ENSG00000156983	7862	BRPF1	bromodomain and PHD finger containing 1		34.4194	50.8168	47.7573	51.1522	38.4891	20.7358	17.1718	18.6198	15.6387	14.4981	20.2289	18.3971	48.8008	36.7065	50.9407	46.162	53.089	40.2895		23.2964	26.9957	19.0312	19.9649	20.3168	20.2176	0.985493
ENSG00000198576	23237	ARC	activity regulated cytoskeleton associated protein		11.9313	6.55036	4.39507	11.1517	9.57885	34.7162	79.666	324.305	175.411	81.0348	97.1627	47.5347	1.09493	8.74478	13.0212	7.52847	5.91085	10.6337		40.3893	183.22	124.157	38.5176	70.4478	42.6898	0.985364
ENSG00000116990	4610	MYCL	MYCL proto-oncogene, bHLH transcription factor		45.5174	37.9659	30.097	25.7051	14.9148	4.74393	4.35765	1.60754	2.97492	1.5351	2.39026	1.75645	43.8112	40.6573	35.9028	25.8446	22.6101	17.6527		11.9856	4.42725	3.5789	1.85888	1.64991	1.61167	0.983249
ENSG00000137252	3062	HCRTR2	hypocretin receptor 2		9.17922	38.0501	41.3135	18.7395	9.29848	3.53699	1.64701	3.24523	0.82431	1.86749	0.766537	1.1518	0	4.04515	9.99991	10.6473	4.37357	3.03093		2.2921	0.795618	1.06805	0.549479	1.35971	0.946697	0.982932
ENSG00000185559	8788	DLK1	delta like non-canonical Notch ligand 1		5.46244	0	0	0	0	0.921965	0	0	0	0	0	0	155.17	8.89808	1.39359	1.07423	0.466603	0		0	0.603544	0.620463	0	0	0	0.982623
ENSG00000184530	352999	C6orf58	chromosome 6 open reading frame 58		0	0	0.41341	0.460806	0.418475	0	0	0	0	0	0	0	0.419842	0	0	0.434903	0.508575	0.627932		0	0	0	0	0	0	0.982486
ENSG00000205268	5150	PDE7A	phosphodiesterase 7A		60.6672	44.4368	40.6287	44.1839	44.6478	15.1035	13.0675	8.18272	8.92127	10.0049	13.0757	11.229	142.571	116.254	85.32	67.0698	90.6894	83.4569		38.6283	32.8788	22.4869	32.5172	27.4727	24.2773	0.982067
ENSG00000112977	1611	DAP	death associated protein		100.263	267.157	200.809	114.09	76.7701	81.2838	78.1578	46.8711	63.4657	35.3212	55.9827	43.6304	100.655	73.5909	164.617	119.33	89.5995	74.4205		53.7274	39.3405	47.1341	37.0246	37.2933	43.2636	0.982006
ENSG00000166484	5598	MAPK7	mitogen-activated protein kinase 7		49.7269	57.2367	51.3742	62.7654	41.1887	43.0306	16.2048	11.5825	12.7942	8.44476	11.6773	9.80369	43.169	56.0538	77.1397	61.885	70.136	52.509		29.6084	18.4986	12.5307	12.0642	11.0357	9.98303	0.98158
ENSG00000158220	83850	ESYT3	extended synaptotagmin 3		0	0	0	0.431503	0.672495	4.64335	1.41288	3.44092	2.66158	3.28475	5.65427	8.49891	1.26877	0.480311	0	1.76242	1.14857	1.04806		3.27633	6.37747	6.14468	5.20283	8.02729	13.4419	0.981409
ENSG00000186204	66002	CYP4F12	cytochrome P450 family 4 subfamily F member 12		0	0	0	0	0	0	0	0	0	1.25103	0	0	0	0	0	0	0	0		0	0	0	3.13712	0.436621	0.470957	0.980994
ENSG00000132832	---	---	---		0	0	0	0	0	1.55896	0.594487	0.880121	1.86939	1.95191	1.00695	1.31943	0	0	0	0	0.488751	0		1.0403	1.27848	2.86764	2.92042	1.96912	2.55992	0.980934
ENSG00000231721	378805	LINC-PINT	long intergenic non-protein coding RNA, p53 induced transcript		0.597747	0.576188	0	0.630203	0.718172	7.76127	6.94023	7.99132	11.5062	13.1702	13.8719	17.6542	0.512835	1.14938	0.97363	1.05371	1.12894	2.16382		8.42358	18.13	17.2145	23.9873	27.3548	30.1995	0.98088
ENSG00000213551	23234	DNAJC9	DnaJ heat shock protein family (Hsp40) member C9		17.8097	14.606	13.6781	12.9994	12.8998	5.54855	5.0889	4.08861	1.69158	3.28022	4.54388	5.8453	93.6277	85.1793	72.011	66.4409	62.4511	56.4759		35.4863	28.5411	26.949	24.5745	27.2372	28.0761	0.980435
ENSG00000179886	84948	TIGD5	tigger transposable element derived 5		21.4024	23.5009	20.7674	24.9554	16.3982	15.6399	9.339	7.00975	11.9394	4.40321	7.61963	6.40361	7.83719	11.8725	11.5891	9.94224	13.5877	9.70308		4.86461	4.37411	5.63441	3.50822	3.0796	3.32018	0.979777
ENSG00000165169	6990	DYNLT3	dynein light chain Tctex-type 3		8.14289	8.68028	8.8353	7.87394	13.9097	15.137	25.9281	45.4668	28.5828	41.5714	64.904	66.7015	10.9427	12.6511	8.84524	13.2958	9.61962	16.9634		27.9728	61.4018	53.6281	55.874	89.8725	111.071	0.979771
ENSG00000138311	22891	ZNF365	zinc finger protein 365		2.52728	4.73482	5.11183	8.86161	17.3035	19.3277	32.171	101.994	61.2809	161.065	184.444	244.686	1.28702	2.78303	2.33047	6.38681	12.7084	11.8825		25.6131	69.9655	97.7348	154.995	158.994	219.256	0.979485
ENSG00000236963	---	---	---		0	0	0	0	0	0.419075	0.625342	1.33803	1.71792	1.99836	1.41951	1.11554	0	0	0	0	0	0		1.4128	3.36773	5.33328	4.88142	4.90641	2.70802	0.979342
ENSG00000260837	---	---	---		0.444049	1.73081	1.64957	1.80532	2.29882	5.38092	6.03763	12.6965	9.16336	11.9917	19.5649	17.3806	0.779084	7.16246	3.80531	4.84327	8.59711	7.2707		10.4736	25.571	22.6088	28.4579	36.8174	32.8855	0.979305
ENSG00000155130	---	---	---		1359.37	1156.69	1245.45	852.741	959.754	695.178	482.712	394.91	316.863	295.856	332.062	226.364	1077.36	1431.64	928.954	1041.46	827.16	952.454		428.392	294.57	295.92	207.645	243.624	215.936	0.979008
ENSG00000158164	11013	TMSB15A	thymosin beta 15a		193.329	82.0734	110.87	105.299	73.1594	28.715	6.69794	0.722366	0.92709	0	0	0	173.477	193.957	116.093	117.464	86.344	91.2961		24.7871	1.92423	1.88027	0.69763	0.607921	0	0.978829
ENSG00000154065	147463	ANKRD29	ankyrin repeat domain 29		1.78115	2.11905	2.10349	2.60421	3.24915	5.44797	10.3544	17.4035	11.662	13.6606	13.2615	16.2298	1.85724	3.642	3.22632	5.42127	1.88115	4.96193		10.0869	23.1741	14.7053	16.3936	16.762	22.5177	0.978597
ENSG00000267774	---	---	---		0	0	0	0.743435	0.756633	0	0	0	0	0	0	0	0	0	0	0	1.01193	0.695946		0	0	0	0	0	0	0.97772
ENSG00000269837	---	---	---		28.1855	22.4443	18.6762	19.8751	14.9806	12.0861	7.3992	4.74023	8.37132	5.22391	7.2888	10.3304	31.2626	27.0154	22.6884	20.0987	19.9271	18.6582		6.87896	3.96104	5.19213	6.64955	6.18321	10.0591	0.977706
ENSG00000169684	1138	CHRNA5	cholinergic receptor nicotinic alpha 5 subunit		5.69748	4.73094	3.84448	1.52888	0.957209	0	0.701247	0	0	0	0	0	18.4753	9.59357	10.4384	8.78464	4.39624	2.82026		1.99444	1.94079	0.54175	1.8933	1.78459	1.17961	0.977687
ENSG00000214575	64506	CPEB1	cytoplasmic polyadenylation element binding protein 1		0	0	0	0.462806	0	4.00636	1.23	5.36177	2.58355	6.03007	7.40492	12.3686	0	0	0	0.466509	0	0.434882		2.23323	3.01818	2.72883	5.41167	6.07619	9.14679	0.977659
ENSG00000178184	84552	PARD6G	par-6 family cell polarity regulator gamma		23.0051	27.3532	21.4455	19.8146	14.758	9.30346	6.61986	5.1359	5.15723	2.80777	3.45781	3.32178	26.8521	21.2087	23.1664	16.6447	21.0312	16.3195		7.2105	3.2999	3.29697	2.63787	2.37195	2.35517	0.97703
ENSG00000204366	221527	ZBTB12	zinc finger and BTB domain containing 12		47.6452	47.5528	61.1129	77.1596	57.4025	16.7127	8.27652	3.78534	5.73137	1.09389	3.77152	3.59946	64.5279	53.8224	46.9288	51.09	57.8657	52.3464		13.5179	5.67977	5.17319	6.65073	4.84416	4.70792	0.977017
ENSG00000184009	71	ACTG1	actin gamma 1		6497.56	5808.52	6421.98	4972.66	4038.47	4368.55	2251.72	2212.31	1645.89	1457.01	1699.57	1363.63	4215.42	4666.5	4325.17	4492.46	4113.1	3342.07		2516.84	1353.79	1467.04	1254.27	1253.81	1274.22	0.97692
ENSG00000184160	152	ADRA2C	adrenoceptor alpha 2C		5.73963	5.75681	5.34436	7.7972	4.33422	10.1751	10.1995	22.9097	27.4167	11.8271	16.0088	9.21514	0.663569	1.16564	3.53688	2.38993	5.74999	1.88562		4.61202	17.8276	21.6642	8.09676	7.98943	5.37891	0.976918
ENSG00000136003	23479	ISCU	iron-sulfur cluster assembly enzyme		40.4739	33.483	36.0078	39.4695	35.8007	58.2514	64.3435	68.2409	89.2078	87.4292	130.238	171.442	41.2521	52.7509	47.4184	50.3521	44.7517	48.9368		63.8867	130.058	155.249	150.73	219.956	262.383	0.976717
ENSG00000157782	9478	CABP1	calcium binding protein 1		5.73319	8.28782	7.53687	6.06601	8.50974	32.0341	74.7474	191.631	248.653	240.217	371.807	403.226	1.33252	8.94432	23.6355	5.73046	21.2361	5.97815		26.3062	98.2101	268.61	234.682	353.865	416.278	0.976139
ENSG00000271714	---	---	---		0	0	0	0	0.42169	1.12312	1.22734	1.89228	2.31169	2.32606	3.06851	2.80112	0	0	0	0	0	0		0.903191	1.28062	1.5172	1.77244	2.78136	2.74497	0.976134
ENSG00000174403	---	---	---		0	0	0	0	0	0	0	0	0	0.909641	1.40465	1.53201	0	0	0	0	0	0		0	0	0	0.744658	1.29879	2.01951	0.975275
ENSG00000139219	1280	COL2A1	collagen type II alpha 1 chain		28.4936	1.39395	0.651491	0.560612	0.744063	0	0	0	0	0.672497	0	0	431.413	30.9009	6.04594	5.99923	0	0.562912		0.671744	0	0	0	0	0.639114	0.975126
ENSG00000162738	57216	VANGL2	VANGL planar cell polarity protein 2		269.576	334.934	248.024	183.615	131.642	94.1242	34.5073	9.6674	10.1013	10.4429	13.8024	10.8046	344.26	357.731	382.323	274.083	254.207	215.305		126.251	18.8555	15.2296	14.0742	11.6969	11.4195	0.974994
ENSG00000066117	6602	SMARCD1	SWI/SNF related, matrix associated, actin dependent regulator of chromatin, subfamily d, member 1		197.641	189.282	154.756	141.967	117.947	84.4352	63.5028	49.6114	46.6275	41.9848	49.2794	51.2483	259.625	208.279	222.707	186.043	174.356	168.717		113.028	64.1649	60.1149	62.4041	56.8648	61.6262	0.974893
ENSG00000088992	54997	TESC	tescalcin		2.2118	1.36957	1.83985	1.84272	1.42975	27.8098	14.0536	27.8416	34.136	25.5585	31.6384	29.321	1.50026	1.58538	2.07129	2.20282	1.26153	1.60031		6.39416	36.1208	33.223	26.9621	37.0483	33.574	0.974339
ENSG00000177051	23403	FBXO46	F-box protein 46		25.221	29.8035	26.6311	42.1748	29.7638	38.3705	15.9436	7.84233	9.5775	7.51862	10.1775	8.96555	31.36	29.2522	29.2058	24.2849	48.787	29.0583		20.0607	12.3746	10.9069	8.4646	8.76434	8.09754	0.97425
ENSG00000079393	51207	DUSP13	dual specificity phosphatase 13		0	0	0	0	0	0	1.10054	3.82761	3.93759	1.83196	0.880566	0	0	0	0	0	0	0		0	1.80381	1.87872	0.801695	0.554456	0	0.97415
ENSG00000245694	643911	CRNDE	colorectal neoplasia differentially expressed		5.16605	1.13259	0.96974	0.942029	0.446501	0	0	0	0	0	0	0	23.9614	17.2567	5.45022	6.23974	1.457	1.51592		0	0.722061	0	0.59008	0.88559	0.428462	0.974056
ENSG00000134871	1284	COL4A2	collagen type IV alpha 2 chain		119.203	135.247	94.1834	64.6052	94.4912	845.073	130.317	37.2754	31.4297	14.4445	30.6397	21.4937	363.842	159.17	189.857	147.928	120.648	131.419		218.817	66.8601	46.5484	24.087	20.4792	27.2293	0.973818
ENSG00000186897	338761	C1QL4	complement C1q like 4		0	0	0	0	0	32.3023	1.88985	0	0	0	0	0	0	1.28438	0	0	0	0		6.04183	0.666971	0	0	0	0	0.973518
ENSG00000156853	115509	ZNF689	zinc finger protein 689		27.6896	36.3985	32.8534	32.5333	24.2964	14.2988	14.734	13.1336	9.80036	7.6765	11.2793	10.8281	28.712	23.9301	26.5888	27.0775	27.4231	24.0725		17.0603	11.7546	11.4902	9.67568	10.5125	11.8821	0.973486
ENSG00000132478	85451	UNK	unk zinc finger		57.7179	39.2958	39.0493	51.5609	42.5907	36.9624	27.2063	14.0715	21.8482	15.9948	19.4849	17.9697	77.018	75.9392	62.6227	55.6378	64.5952	60.7275		37.5842	24.4799	25.1444	27.0681	22.8987	22.1476	0.973238
ENSG00000143355	56956	LHX9	LIM homeobox 9		37.7335	1.55647	1.09255	0.412969	0	0	0	0	0	0.779618	0	0	29.3794	61.0668	16.2989	5.05509	0	0		0	0	0	0	0	0	0.973037
ENSG00000138378	6775	STAT4	signal transducer and activator of transcription 4		0.736352	0.638767	0.520643	1.03436	1.33935	2.06185	2.22286	3.42733	2.63504	8.03273	14.651	30.1674	2.83115	3.86116	1.61379	3.53698	1.38941	2.55592		4.15761	9.48725	8.0057	6.52401	21.1057	60.6269	0.972737
ENSG00000231728	100128594	TMSB15B-AS1	TMSB15B antisense RNA 1		1.07484	1.47987	1.81792	1.95226	1.50662	0	0.645136	0	0	0	0	0	1.1614	1.76991	2.0331	1.98003	3.08139	2.08907		1.03467	0	0.447753	0	0	0	0.972588
ENSG00000124134	3787	KCNS1	potassium voltage-gated channel modifier subfamily S member 1		0	0.981241	0.797023	1.71846	4.22589	5.6156	7.3286	10.745	4.69912	23.1328	49.6253	93.1581	1.5893	1.05443	0.583665	1.75854	1.64525	2.3988		11.0978	7.71086	17.3361	22.4205	35.3676	104.402	0.972417
ENSG00000160325	11094	CACFD1	calcium channel flower domain containing 1		81.0226	108.203	95.7453	119.917	73.7879	54.1277	34.5069	15.1968	22.4074	12.0774	16.2536	13.1637	44.8171	76.5696	69.3735	81.0825	90.2866	66.4283		32.7317	17.9997	20.2643	21.7422	14.989	12.5636	0.972263
ENSG00000123685	55509	BATF3	basic leucine zipper ATF-like transcription factor 3		0	0.650597	0.505721	1.23519	1.42173	4.64335	2.04085	3.99649	6.15924	3.51394	4.33474	2.79249	0	0.435883	0.693851	1.06263	2.44643	1.06987		4.57387	6.09216	8.80382	4.8585	6.25726	4.22703	0.972218
ENSG00000130699	6874	TAF4	TATA-box binding protein associated factor 4		27.2797	29.257	27.7316	30.6409	29.7657	13.3936	17.2173	11.2336	12.7602	13.076	13.9861	10.621	48.1065	46.9631	45.2258	38.9158	47.5947	44.1364		26.2385	20.1325	12.5656	14.8354	14.2621	12.5679	0.97217
ENSG00000196511	27010	TPK1	thiamin pyrophosphokinase 1		1.11953	1.25658	1.43778	1.56186	1.47218	3.06763	3.28298	4.21519	3.09808	3.89451	5.29754	6.44303	1.72662	1.30942	1.67479	1.54308	2.00536	1.6089		2.99972	4.85073	5.02401	4.55526	6.28643	7.8365	0.971787
ENSG00000138617	54956	PARP16	poly(ADP-ribose) polymerase family member 16		18.0021	16.011	13.6222	21.6861	16.1292	16.5786	7.23387	3.86808	5.26534	3.85936	5.04919	5.52742	29.4584	27.2263	23.5887	21.4237	26.3882	23.9322		12.6958	9.23324	6.18435	6.83838	6.48715	6.97879	0.971371
ENSG00000111450	2054	STX2	syntaxin 2		39.8709	37.1605	33.4952	35.5177	28.9858	21.9763	14.5214	10.3486	12.7314	10.5134	12.2953	11.8416	59.0583	77.8063	78.0212	62.8708	76.0127	70.988		41.8609	30.6296	25.5066	27.3257	24.7722	24.025	0.971146
ENSG00000179837	---	---	---		159.772	199.96	177.002	214.364	164.38	95.4652	59.1166	53.2556	29.811	32.6102	51.4749	44.42	200.425	169.241	192.925	204.561	191.569	180.753		96.5264	58.2438	65.1671	41.8436	49.1137	53.9237	0.970844
ENSG00000180035	197407	ZNF48	zinc finger protein 48		68.0611	69.1201	71.5394	78.9381	63.7381	31.7659	20.4791	23.4238	23.8955	17.4187	23.7535	21.265	60.803	65.8553	62.2661	54.8882	64.0808	46.6372		24.1315	19.4322	27.2639	20.9308	20.7899	23.125	0.970814
ENSG00000213024	23636	NUP62	nucleoporin 62		77.1375	70.1478	72.6621	77.9529	58.9673	41.0861	23.7447	14.9547	18.0198	14.1133	25.4089	22.4371	88.7199	62.5933	67.9467	62.1127	73.1149	57.88		33.9513	26.8321	20.5623	19.4324	19.7157	21.7126	0.970615
ENSG00000107443	54619	CCNJ	cyclin J		50.6059	36.4431	29.2963	28.7455	24.4561	5.34739	6.66435	3.62797	3.10419	2.52919	4.50629	3.55431	99.6429	51.2556	38.1143	38.1918	38.0169	35.6123		14.5785	12.716	4.86759	4.73362	4.64048	4.343	0.970302
ENSG00000142449	84467	FBN3	fibrillin 3		31.1504	78.9259	54.3577	106.536	94.9655	30.3243	15.1333	4.1056	4.82983	3.37851	2.77944	2.27156	179.679	129.22	157.905	162.715	269.874	263.989		78.0891	12.2229	9.7996	7.45058	3.55188	3.20492	0.970111
ENSG00000181588	399664	MEX3D	mex-3 RNA binding family member D		101.831	70.6459	65.4495	93.7059	62.2694	57.3127	31.9532	28.1455	18.8773	11.2533	16.2711	12.4994	55.523	64.4097	49.2133	39.6356	45.723	39.8368		23.6945	16.7515	14.1741	13.5653	8.48488	5.84297	0.969947
ENSG00000260664	---	---	---		19.4716	45.3987	35.6424	22.1973	20.9726	3.97283	4.63377	2.67355	7.36508	5.31733	6.41716	7.03023	0	22.2655	64.6503	45.1325	34.2923	40.4733		13.3248	8.34574	12.1729	15.8372	14.9115	14.1306	0.969835
ENSG00000121064	59342	SCPEP1	serine carboxypeptidase 1		5.70375	2.52767	1.46817	1.21518	1.30537	10.5439	8.71193	12.4678	12.9687	14.3772	14.2598	21.6235	13.2379	6.96162	6.13418	4.04285	1.74724	2.55103		13.2916	21.1499	22.9834	25.7008	36.0538	46.1502	0.969756
ENSG00000131849	7691	ZNF132	zinc finger protein 132		9.12209	14.1202	12.6	16.6232	11.2733	5.68265	5.31534	8.05373	5.61741	6.22661	7.31927	8.65332	9.54517	5.46106	9.38267	7.87787	9.02462	7.05474		3.94816	4.8997	4.48385	4.01092	5.14328	5.99263	0.969738
ENSG00000185015	377677	CA13	carbonic anhydrase 13		0.570299	0	0.420898	0	0	1.92774	2.10386	2.5461	1.90329	3.66237	4.01044	4.4015	3.79937	2.41273	1.20841	1.48304	1.10816	2.38891		3.6164	4.20275	3.73728	5.16039	5.02938	5.75837	0.969737
ENSG00000129351	3609	ILF3	interleukin enhancer binding factor 3		687.266	580.82	589.783	644.236	529.673	235.101	183.071	157.497	124.729	123.839	172.711	166.375	1242.08	930.619	888.294	700.337	702.726	693.893		356.903	187.4	187.646	177.808	178.699	197.963	0.969324
ENSG00000100105	23598	PATZ1	POZ/BTB and AT hook containing zinc finger 1		185.363	168.809	180.908	149.906	132.617	91.1739	42.7753	18.4973	37.4809	23.9117	35.2285	24.7929	161.535	141.356	157.468	136.757	121.42	124.648		68.6922	30.9344	25.5987	29.9832	22.5019	24.7263	0.969305
ENSG00000135423	27165	GLS2	glutaminase 2		0.401284	3.72799	3.59112	6.9524	8.65972	19.6965	16.3412	37.5282	31.3258	29.9035	37.4103	58.7337	0.476598	2.77375	2.46804	6.87784	9.71665	6.8975		15.5256	34.2204	46.3932	29.3022	52.3	74.8231	0.968842
ENSG00000124160	57727	NCOA5	nuclear receptor coactivator 5		73.8826	120.533	116.932	117.024	100.743	27.9439	36.5911	37.2224	29.9793	28.4413	31.9874	33.7079	109.049	105.719	110.938	126.209	118.135	112.677		41.0489	44.2259	39.1578	39.5529	41.2392	37.4901	0.968811
ENSG00000137571	81796	SLCO5A1	solute carrier organic anion transporter family member 5A1		86.0711	81.6491	76.9425	39.3949	46.3586	3.23526	3.38615	1.22979	1.97796	1.81116	0.989352	0.906802	24.8444	80.5053	84.2352	68.9773	58.7266	59.3035		21.3485	5.35714	2.38255	0.732286	1.35758	1.55003	0.968752
ENSG00000229638	---	---	---		49.8044	61.6828	60.7073	72.1421	55.8992	41.4884	32.5059	21.6838	26.2229	17.6143	17.3936	17.179	19.1195	16.1498	22.8306	19.5526	20.0204	17.9822		12.1174	8.91085	7.14493	4.77433	4.45227	4.92426	0.96854
ENSG00000131470	29893	PSMC3IP	PSMC3 interacting protein		14.293	8.09246	9.00235	7.80194	6.51587	4.14046	2.45059	1.91442	1.92759	2.14883	1.62056	2.13991	34.1925	32.9101	27.2715	23.9067	19.9489	17.4612		10.487	6.94189	5.5956	6.47683	6.71687	4.24471	0.968339
ENSG00000185105	255275	MYADML2	myeloid associated differentiation marker like 2		0	1.48449	0.818871	1.19119	1.26226	1.12312	2.07974	3.45623	3.20571	3.67134	6.01752	6.30571	0	0	0	0	0	0		0.510974	1.60989	1.90534	2.56974	3.70994	4.94569	0.968088
ENSG00000145919	91272	BOD1	biorientation of chromosomes in cell division 1		106.427	69.8927	89.2324	74.7251	70.2481	41.3543	37.7278	32.0761	42.932	32.4457	30.6159	38.1306	127.782	98.9703	83.0527	79.3469	69.6893	68.3502		44.3527	41.0718	46.9799	42.8812	45.3707	43.327	0.967993
ENSG00000153495	121793	TEX29	testis expressed 29		0	0	0	0	0	0	0.482928	0.899581	2.03255	3.74589	4.67586	3.817	0	0.540575	0	0	0	0		0.694897	2.15366	2.79663	4.57963	9.3712	6.90543	0.967959
ENSG00000076554	7163	TPD52	tumor protein D52		5.82368	21.601	22.1476	13.4479	24.4108	33.9451	36.9708	122.285	73.2755	144.813	148.22	165.489	12.9186	11.7625	13.8257	18.414	24.6188	14.3345		41.0238	107.078	121.54	160.589	196.379	211.095	0.96773
ENSG00000115207	2976	GTF3C2	general transcription factor IIIC subunit 2		42.4555	51.4578	44.5292	43.2918	41.2049	36.9624	25.9302	17.506	17.2806	22.5039	24.0387	26.8298	93.9988	62.3865	69.8889	65.1689	68.6545	62.8849		49.587	36.766	33.8465	35.1055	36.0585	41.5126	0.96754
ENSG00000042429	9440	MED17	mediator complex subunit 17		47.5863	57.9623	54.0446	43.6016	39.7855	15.5393	17.8693	22.0793	15.1027	17.0922	17.6183	17.0234	53.1793	60.8021	61.1113	59.5379	53.9822	57.1969		28.778	24.5455	17.5637	19.7544	23.085	20.4674	0.967406
ENSG00000234233	---	---	---		0	0	0	0	0	0	0	0	0.711857	1.67676	0.816396	0.984699	0	0	0	0	0	0		0	0.838913	1.19451	3.00054	1.3584	1.67965	0.967076
ENSG00000103269	9028	RHBDL1	rhomboid like 1		0	0	0	1.39626	2.67334	32.0006	22.1133	20.758	33.8469	21.7779	27.1663	25.1044	1.14751	2.49541	1.43098	1.88212	2.61887	2.54751		13.1335	16.2018	22.7453	20.7464	20.8215	23.6713	0.966963
ENSG00000130813	55337	SHFL	shiftless antiviral inhibitor of ribosomal frameshifting		0.544775	0.698937	0.509248	3.3313	5.26203	31.2965	25.859	22.9146	28.1477	17.6465	25.8482	22.9245	1.29768	3.87867	3.30588	5.86383	7.43041	14.6679		62.964	76.4439	75.9055	69.3463	69.9811	79.3857	0.966912
ENSG00000100425	23774	BRD1	bromodomain containing 1		79.8646	107.027	99.2076	98.2182	78.0649	29.6537	24.8937	17.9924	18.4126	13.2614	25.1204	22.3681	107.889	102.779	103.589	93.1962	112.169	89.3412		52.6773	44.0433	33.9146	37.9063	39.5579	33.7606	0.966706
ENSG00000141750	342667	STAC2	SH3 and cysteine rich domain 2		1.95576	0.893142	1.38368	2.26041	2.29068	19.5289	12.0554	16.2581	17.6944	21.3613	45.0198	83.6899	1.45638	1.70197	1.58273	2.90603	5.00769	2.29829		7.69778	35.0716	22.8555	19.6074	37.2303	92.9249	0.966542
ENSG00000115295	79745	CLIP4	CAP-Gly domain containing linker protein family member 4		6.71251	11.923	10.6815	7.5076	11.0354	9.83988	10.5852	26.133	19.4556	41.5269	38.9347	43.4899	7.95227	18.4872	15.5433	13.3356	21.0201	16.0928		20.4408	40.3339	37.4202	61.862	52.2219	56.2989	0.966381
ENSG00000130830	4354	MPP1	membrane palmitoylated protein 1		16.7754	22.7833	27.7458	24.8382	29.2952	40.5832	28.1088	43.0686	40.4156	48.2898	61.4622	78.4347	10.6479	15.7059	25.1178	25.6935	24.4581	26.0805		38.6941	40.8974	56.7677	64.2506	76.0219	90.6482	0.966127
ENSG00000079462	5050	PAFAH1B3	platelet activating factor acetylhydrolase 1b catalytic subunit 3		181.942	229.299	296.453	343.268	237.514	212.035	75.7773	40.4101	36.392	18.4461	21.4334	16.7092	84.398	179.236	184.94	187.216	250	177.354		115.497	40.8906	37.0242	22.7367	22.7801	20.9374	0.966089
ENSG00000169692	10555	AGPAT2	1-acylglycerol-3-phosphate O-acyltransferase 2		4.15845	1.93614	1.06795	0.78129	0.839085	7.79479	4.04507	3.99669	10.1206	4.6492	9.71737	9.87855	6.32557	4.04973	3.24952	1.80559	1.74888	0.742448		3.74606	5.00661	8.30265	4.74216	8.03858	10.598	0.966032
ENSG00000116001	7072	TIA1	TIA1 cytotoxic granule associated RNA binding protein		155.436	99.6344	100.204	112.4	95.8514	46.0479	45.1428	26.0044	31.9582	25.1479	24.4428	29.9661	399.111	458.128	318.444	254.714	294.191	364.092		109.186	80.4678	59.4866	105.087	84.2406	71.9327	0.965885
ENSG00000177551	4808	NHLH2	nescient helix-loop-helix 2		30.107	23.2783	12.9506	4.52667	1.63676	0.687283	0.646576	1.71387	1.54612	2.42494	2.08413	2.52736	12.8854	61.2203	28.7737	15.9451	3.15866	0.887453		0.914354	1.03741	0	3.43883	1.80725	1.01431	0.965821
ENSG00000162931	51127	TRIM17	tripartite motif containing 17		0	0.474709	0.406806	1.72041	1.54961	6.42023	5.93375	6.68034	7.18823	5.95131	9.21191	10.3282	3.32722	1.38278	0.628537	1.92331	1.03482	2.50478		10.9369	19.6685	22.0956	13.3952	20.1723	27.0491	0.965807
ENSG00000009954	9031	BAZ1B	bromodomain adjacent to zinc finger domain 1B		203.289	188.773	203.253	151.662	150.586	44.3716	63.1735	66.9375	57.6777	44.2623	87.4209	87.765	356.545	189.457	206.558	174.98	161.09	150.27		86.8882	71.7627	61.3842	67.0908	71.351	86.2207	0.965802
ENSG00000135315	22832	CEP162	centrosomal protein 162		11.437	11.433	11.7193	10.8617	12.0902	3.87225	4.25994	4.49204	2.36728	1.56693	3.38503	3.61106	48.2596	32.0093	26.8615	26.8992	31.0051	29.5395		16.1257	12.9404	6.67982	10.7702	12.1736	9.6106	0.965715
ENSG00000164181	79993	ELOVL7	ELOVL fatty acid elongase 7		0.577514	2.10958	1.28307	0.799223	1.87292	7.1578	6.61251	10.1749	11.1607	14.7995	12.1696	14.7133	2.12754	1.34244	1.75789	2.60071	2.38987	2.09294		7.30068	13.5708	18.651	25.8074	16.9684	17.4266	0.965687
ENSG00000156787	93594	TBC1D31	TBC1 domain family member 31		14.2899	12.8079	11.6456	6.68003	5.1316	2.59826	5.61651	5.62341	5.55516	4.03553	4.37671	4.72537	27.6823	21.0655	22.6669	18.7092	13.1672	12.3895		9.63309	12.7936	10.2887	9.81714	9.77783	9.46711	0.965644
ENSG00000213626	81606	LBH	LBH regulator of WNT signaling pathway		45.0495	69.024	61.4466	32.4607	27.3718	9.70577	12.9438	15.785	7.86126	11.5866	12.4594	10.8824	22.2353	29.4168	38.2924	32.5672	24.4835	21.4651		8.12366	9.05508	4.28225	2.1087	5.07985	7.86457	0.965633
ENSG00000075856	9733	SART3	spliceosome associated factor 3, U4/U6 recycling protein		94.1067	81.9625	90.5268	81.3872	76.8196	52.9878	38.4177	42.1156	34.6591	34.0948	46.1127	51.0533	133.522	98.5417	101.46	90.4041	91.578	85.5042		61.5371	55.4553	48.0742	46.3564	53.7833	62.079	0.965524
ENSG00000205531	4676	NAP1L4	nucleosome assembly protein 1 like 4		278.572	222.991	246.947	239.426	245.755	223.166	180.472	127.231	157.855	111.911	159.971	142.62	239.248	230.348	210.188	218.757	228.673	214.365		169.082	146.37	165.312	153.885	161.123	167.321	0.965496
ENSG00000170265	8427	ZNF282	zinc finger protein 282		56.0606	70.1084	68.0866	85.185	66.4333	62.7104	33.4714	28.9587	25.0117	17.8797	26.5277	22.69	43.3335	46.7991	53.711	52.5324	68.1614	46.9003		39.7521	27.3	25.4856	22.4789	19.9796	19.9034	0.965351
ENSG00000129991	7137	TNNI3	troponin I3, cardiac type		0.505802	0	0	0	0.747928	4.5763	7.14986	3.2245	3.82246	1.32416	0.509059	0.412722	1.10702	0.942221	0	0	0	0		4.36822	2.33994	3.37808	1.05002	0.798763	0.521026	0.965279
ENSG00000141542	10966	RAB40B	RAB40B, member RAS oncogene family		11.743	17.6989	19.005	28.4781	33.4525	32.0676	59.5787	101.929	118.218	109.997	133.244	110.781	8.15013	17.9526	16.4245	24.0505	34.9691	30.8596		37.5029	131.613	176.021	175.936	172.671	126.032	0.965114
ENSG00000198728	8861	LDB1	LIM domain binding 1		182.366	206.789	214.942	217.998	161.775	100.561	56.4043	53.1246	47.1779	41.6158	56.9259	68.2359	164.039	165.547	195.632	178.522	183.915	171.457		99.7225	60.5294	39.1215	39.4933	56.4474	82.5705	0.965026
ENSG00000179899	---	---	---		10.1848	11.6867	12.6731	11.635	10.2874	3.77167	2.73749	3.39877	3.03384	1.51611	2.40221	2.34798	5.35161	4.27551	5.66091	5.48626	4.32021	4.84656		1.76077	2.23048	0.544388	0.532505	1.12914	1.65915	0.964552
ENSG00000113838	55171	TBCCD1	TBCC domain containing 1		17.9267	15.3529	18.5629	21.4473	22.055	11.6503	11.8848	10.5539	9.82198	8.5106	7.77665	9.07673	22.5799	12.9849	14.4816	19.0971	22.2284	24.0252		11.47	9.528	6.07815	4.69243	6.38514	6.86766	0.964292
ENSG00000116833	2494	NR5A2	nuclear receptor subfamily 5 group A member 2		0.659911	0	0	0	0	0	0	0	0	0	0	0	2.08964	1.5273	0.411892	0	0	0		0	0	0	0	0	0	0.964015
ENSG00000213672	51517	NCKIPSD	NCK interacting protein with SH3 domain		20.3867	20.2773	16.1031	27.6217	20.0736	41.8907	20.8288	36.3969	33.4007	46.8519	71.7936	111.392	34.8003	28.1608	28.3656	25.5801	28.1565	25.2305		29.3294	34.4604	57.6852	56.8984	66.2651	117.35	0.96392
ENSG00000171867	5621	PRNP	prion protein		36.2302	120.744	148.102	126.399	192.185	336.115	591.518	676.52	618.187	704.302	810.613	860.337	17.1615	58.3213	68.3892	139.018	133.652	127.339		382.718	719.827	814.316	742.373	958.467	1012.58	0.963895
ENSG00000187535	9742	IFT140	intraflagellar transport 140		66.0342	67.2732	65.8903	75.7581	68.9059	52.619	29.5548	30.3261	18.3053	16.2048	25.8361	27.0012	85.2268	76.9024	77.3865	70.6966	87.1758	65.099		47.4559	24.8127	21.5766	16.413	20.5007	29.0358	0.96384
ENSG00000198399	50618	ITSN2	intersectin 2		10.3832	12.9657	11.2789	13.3159	19.4859	14.8688	26.5924	42.6514	21.2055	32.8339	41.0386	42.1287	17.2879	14.7595	17.3222	19.7702	26.7472	29.773		29.8008	45.5834	30.2528	38.1294	43.0185	44.8498	0.963637
ENSG00000100426	9889	ZBED4	zinc finger BED-type containing 4		96.8574	94.7895	78.2156	77.4376	60.1482	23.1832	13.3748	9.35338	8.43467	6.84759	10.8406	10.6916	113.958	78.13	85.6809	78.5384	90.9378	73.5024		29.4232	16.2008	9.95716	7.18696	8.56408	8.39784	0.963409
ENSG00000204564	221545	C6orf136	chromosome 6 open reading frame 136		9.32642	9.76725	9.77211	14.2524	14.5149	26.2006	26.005	26.36	32.0268	38.165	41.701	42.2873	10.4183	19.0024	16.9991	16.2015	20.2718	16.189		25.1554	34.5731	48.0861	52.3248	51.1985	54.3627	0.963355
ENSG00000197951	58491	ZNF71	zinc finger protein 71		31.2517	33.1467	34.6563	41.9202	26.4072	18.4225	11.8374	13.8338	10.2418	7.00396	9.86364	10.6104	33.8027	27.2288	29.5535	29.162	31.4339	28.6978		12.9082	9.67619	9.99093	10.4848	8.72375	9.07263	0.963201
ENSG00000108176	56521	DNAJC12	DnaJ heat shock protein family (Hsp40) member C12		2.10345	1.68938	2.06807	2.59905	2.87865	15.2711	7.96135	15.6915	15.5321	13.8461	19.8253	24.5794	3.82707	5.57063	1.96709	4.64348	1.08876	1.79004		12.5414	19.9831	29.0052	30.4939	35.9239	37.0952	0.96317
ENSG00000196576	23654	PLXNB2	plexin B2		221.356	190.14	161.209	243.842	172.823	130.433	86.4053	34.6134	54.7482	26.872	50.1176	41.1032	292.933	290.273	297.969	292.675	309.66	261.717		165.867	92.9536	63.066	53.3715	60.6726	72.2054	0.963152
ENSG00000180357	23060	ZNF609	zinc finger protein 609		170.19	226.711	185.948	168.115	170.121	104.249	66.9229	52.3111	52.9233	43.5498	61.4716	65.045	237.584	154.605	219.792	204.15	193.254	178.769		111.745	57.4711	45.7098	42.6058	41.3162	49.7557	0.96294
ENSG00000139597	90634	N4BP2L1	NEDD4 binding protein 2 like 1		3.80905	2.46613	2.37696	4.41219	5.07691	15.5393	13.7785	10.3469	14.7323	14.6808	17.5255	19.1594	2.70684	5.14197	4.65547	4.49519	6.22409	12.4413		23.3424	28.0038	27.026	34.5312	39.3424	50.4903	0.962929
ENSG00000188321	84527	ZNF559	zinc finger protein 559		23.3431	17.2757	14.1577	13.794	13.4639	8.49884	8.6036	5.02815	5.80922	3.83507	6.33245	6.26059	39.1381	42.8734	38.4852	30.3489	27.1319	31.3256		13.8394	13.8986	10.459	13.1154	13.0884	9.78222	0.962582
ENSG00000107815	56652	TWNK	twinkle mtDNA helicase		18.7738	20.7547	21.0259	20.5921	16.2829	6.92312	9.08471	9.19289	5.10714	5.48338	6.29646	6.77895	30.4843	18.887	23.9234	22.9428	25.4987	20.856		16.1523	10.5168	7.32922	8.07304	8.41294	8.56126	0.96243
ENSG00000264885	---	---	---		9.21468	9.30432	9.26244	8.58165	6.78612	2.16243	1.25514	1.03515	0.575519	0.651982	0.667468	0.993328	12.3319	7.75001	9.95335	10.2678	9.76793	9.3144		3.76295	1.21201	0.517859	1.21478	0.514199	0.684549	0.962302
ENSG00000167157	51450	PRRX2	paired related homeobox 2		0	0	0	0	0	0	0.936503	2.00419	3.44271	0.881563	0.746189	0	2.42029	0	0	0	0	0		0	1.48819	2.82417	0.752454	0.834633	0	0.962268
ENSG00000106144	835	CASP2	caspase 2		39.8141	48.2116	42.3772	39.2396	35.8976	13.7959	8.44093	7.88189	5.3045	7.96605	7.12038	8.31001	76.8552	43.6708	55.211	53.7111	59.2516	51.2244		23.5975	8.64231	6.2228	7.07893	6.51194	7.24356	0.962251
ENSG00000183908	219527	LRRC55	leucine rich repeat containing 55		61.9163	120.439	100.149	122.266	116.428	51.7138	31.3058	14.8167	9.61563	7.78192	11.6846	17.8943	24.5401	83.2057	118.308	149.664	148.161	164.393		69.0775	14.6035	12.7372	8.76642	15.6063	12.5383	0.962213
ENSG00000029993	3149	HMGB3	high mobility group box 3		275.624	137.513	172.638	125.973	143.935	39.0745	63.6051	41.2573	31.4081	29.1764	30.6288	20.4801	281.643	264.94	194.094	182.764	94.7518	129.067		76.0932	39.7393	45.0079	23.9458	26.2117	32.9236	0.962026
ENSG00000149532	79869	CPSF7	cleavage and polyadenylation specific factor 7		143.647	141.173	141.419	127.893	125.208	117.157	75.7494	60.9607	63.8362	65.8464	82.9718	90.2876	219.282	178.13	181.517	175.093	166.215	156.219		128.785	105.424	86.1395	95.6994	100.207	118.482	0.961981
ENSG00000100285	4744	NEFH	neurofilament heavy		2.42511	11.3459	6.94977	10.6811	8.94016	7.2919	19.9592	69.7604	25.3529	50.8353	125.541	172.31	5.81325	4.24512	2.64469	4.25193	4.51295	2.6091		14.3488	44.5247	59.0485	82.8606	139.132	187.997	0.961924
ENSG00000268686	101928295	LOC101928295	uncharacterized LOC101928295		0	0	0	0	0	0	0	0	0	0	0.401536	0.69109	0	0	0	0	0	0		0	0	0.416909	0	0.860936	1.34088	0.961605
ENSG00000179361	10620	ARID3B	AT-rich interaction domain 3B		8.11333	7.15668	5.78377	11.0901	6.4185	5.31387	2.69304	1.808	2.16209	1.28872	1.8722	1.20668	71.3196	28.4796	23.549	14.221	29.6049	18.7862		13.057	4.35117	3.52988	4.08847	4.11405	3.32609	0.961348
ENSG00000255916	101928416	LOC101928416	uncharacterized LOC101928416		0	0	0	0	0	0	0	1.07763	1.68735	1.67628	1.78702	2.3246	0	0	0	0	0	0		0	1.79131	2.88845	4.26219	5.80825	5.55781	0.961237
ENSG00000196150	58500	ZNF250	zinc finger protein 250		32.0006	68.7552	65.0991	54.7054	42.0075	17.115	12.3028	8.21654	6.54345	6.27719	9.31156	9.80548	33.9184	47.8221	66.8281	64.8332	67.6886	59.8261		27.2175	13.5031	10.7618	9.09756	10.2085	13.1909	0.961198
ENSG00000185252	7625	ZNF74	zinc finger protein 74		51.3148	82.0635	75.1281	103.716	63.4882	47.4225	22.1075	19.6686	14.4879	10.4102	14.7177	15.2858	56.7288	70.8106	72.4799	72.9205	90.14	69.4765		37.5882	23.1284	18.6834	15.0797	14.7	15.4636	0.961037
ENSG00000154845	9989	PPP4R1	protein phosphatase 4 regulatory subunit 1		153.253	128.107	117.162	106.662	94.8718	52.2167	56.765	22.9079	35.0014	23.0808	29.1499	29.4437	176.737	153.196	157.59	149.179	106.978	129.112		80.3062	56.318	36.0289	48.3696	44.0931	43.3638	0.961021
ENSG00000156876	163786	SASS6	SAS-6 centriolar assembly protein		8.7888	5.92497	5.09916	3.38014	4.50531	2.263	2.32901	1.57539	2.0996	2.55173	2.29983	2.02996	26.8069	14.7381	11.4828	9.24178	9.03901	9.4955		4.67065	3.63939	3.45689	4.18323	4.23334	3.17233	0.960964
ENSG00000221946	53822	FXYD7	FXYD domain containing ion transport regulator 7		10.8432	17.0075	18.0142	28.4183	42.6552	148.57	127.703	93.2365	170.916	68.2084	111.968	83.5418	1.11596	17.3545	12.7912	10.2289	24.0671	11.8657		71.4077	48.9946	112.622	57.4028	72.3794	61.8284	0.960858
ENSG00000167840	7775	ZNF232	zinc finger protein 232		29.2636	16.4183	19.3343	18.7645	16.1782	6.65491	5.62587	6.97779	6.69119	4.06819	5.07999	5.59743	40.6522	47.8257	29.8305	23.8681	25.8118	25.4884		11.9042	13.3759	8.3854	12.2032	8.56532	7.53681	0.960714
ENSG00000169641	7798	LUZP1	leucine zipper protein 1		27.1117	27.4285	21.3763	16.1287	15.3197	18.6237	35.5315	45.7132	33.4453	43.6831	85.5403	121.25	66.9704	22.159	26.4838	27.428	16.2549	18.3707		25.2609	39.4616	36.3918	30.7999	48.6024	84.3303	0.960531
ENSG00000136235	10457	GPNMB	glycoprotein nmb		1.66109	0.883923	0.518461	0	0.806434	14.567	6.1821	10.3133	15.4948	8.15452	18.3977	17.6711	2.03603	1.05024	2.55278	3.78134	0.592116	1.56918		6.87895	11.1526	15.0492	3.94607	22.4534	21.254	0.960276
ENSG00000167395	9726	ZNF646	zinc finger protein 646		35.6502	51.8625	43.8286	56.9672	36.4487	17.5509	14.4984	10.9963	10.8037	9.35145	17.6216	14.6307	55.3214	43.5441	52.8593	45.9015	48.1408	43.8007		22.7149	20.4793	15.3453	14.4421	16.5727	17.7131	0.960068
ENSG00000135750	3775	KCNK1	potassium two pore domain channel subfamily K member 1		0.461967	2.87589	3.70305	4.40061	3.99949	4.60982	22.6982	73.042	70.4871	67.5047	97.2377	111.661	2.71444	1.92836	1.79978	5.45661	3.77945	2.74267		10.0173	51.7247	93.6771	77.9685	120.933	103.89	0.959931
ENSG00000141141	---	---	---		37.9325	22.8948	25.6335	20.6645	22.4169	11.0468	12.6571	12.1545	7.1526	7.27126	9.81129	10.0821	72.7806	47.1186	36.9639	38.862	37.1901	39.0638		23.542	21.2992	14.0314	19.054	17.4427	17.1636	0.959925
ENSG00000243452	---	---	---		8.21545	6.27411	6.71726	8.1491	7.94619	3.50347	2.83943	1.77916	1.37964	0.938228	1.55255	1.8391	20.4855	17.656	20.1398	16.5798	20.5144	17.7232		10.2166	7.55986	3.64255	3.5255	5.60907	5.03289	0.959797
ENSG00000147535	84513	PLPP5	phospholipid phosphatase 5		39.046	51.7688	50.5711	50.9144	41.132	17.685	11.7698	5.78563	9.36289	8.70557	9.37898	11.5559	44.5572	73.8423	76.67	67.0903	79.6945	77.5372		35.5927	19.396	12.2607	15.707	16.3857	21.7873	0.959781
ENSG00000158427	286527	TMSB15B	thymosin beta 15B		22.2694	12.698	14.9979	20.9534	16.0727	8.26416	6.26005	2.89107	3.20103	2.24476	1.2004	1.58684	24.0147	30.6363	19.9499	23.9058	21.8583	28.205		9.03707	3.2003	2.83746	2.78308	2.22974	2.42739	0.959773
ENSG00000257057	643037	C11orf97	chromosome 11 open reading frame 97		0	0	0	0	0	0	0	0.791335	0.688537	0.55265	0.799145	1.04832	0	0	0	0	0	0		0	0.790092	1.24039	1.01588	1.59781	1.57636	0.959634
ENSG00000132471	23558	WBP2	WW domain binding protein 2		126.754	200.736	214.013	207.914	220.65	465.458	302.574	397.311	405.607	453.216	560.338	553.899	51.8995	113.538	136.481	156.089	178.591	159.081		256.462	308.528	439.886	410.288	429.86	533.942	0.959558
ENSG00000187608	9636	ISG15	ISG15 ubiquitin like modifier		2.94806	1.38055	1.09081	5.59171	3.29793	32.4699	42.4126	34.3958	39.938	40.0794	24.3191	14.5639	2.90081	5.41611	2.95708	2.76674	1.68152	2.55005		24.3996	17.5413	26.7006	17.665	14.8318	11.9027	0.959261
ENSG00000269430	---	---	---		9.00701	17.3654	13.7693	18.1711	16.0754	11.2815	1.6263	0.742132	0	0.883103	0.4691	0	10.9004	13.9668	18.5454	18.1963	27.5594	17.2994		7.91296	1.21936	0	0.48139	0	0	0.959036
ENSG00000164733	1508	CTSB	cathepsin B		134.788	144.077	149.115	146.588	171.129	599.696	422.93	831.16	547.646	518.531	589.013	586.163	90.5417	99.963	120.28	130.311	127.704	130.426		381.423	762.067	756.194	477.345	549.629	563.3	0.958996
ENSG00000173457	26472	PPP1R14B	protein phosphatase 1 regulatory inhibitor subunit 14B		145.653	138.427	170.351	189.134	114.022	62.9786	38.5469	15.8446	30.0574	11.2714	15.5379	9.28307	52.4506	84.6831	87.0373	96.7122	96.482	95.93		44.8974	22.3097	17.884	13.586	12.3012	10.9822	0.958974
ENSG00000138606	90525	SHF	Src homology 2 domain containing F		98.6837	104.989	112.349	129.876	109.46	122.42	33.5899	24.494	24.2686	12.8441	18.2526	21.544	33.8748	82.9294	82.7489	91.8586	88.4515	78.0083		57.4423	22.5547	24.3518	14.6442	21.8453	26.5938	0.958795
ENSG00000102710	55578	SUPT20H	SPT20 homolog, SAGA complex component		68.09	65.3282	60.3932	52.2886	49.6884	40.2144	24.8685	15.8383	12.5241	13.89	15.9832	20.296	116.246	101.942	91.9965	93.0829	94.3104	87.3527		61.1578	47.888	24.185	33.9977	31.8009	30.528	0.958737
ENSG00000163873	2899	GRIK3	glutamate ionotropic receptor kainate type subunit 3		130.03	790.16	471.774	245.573	171.632	103.847	93.5274	73.613	46.7585	53.9224	76.0124	84.139	31.7378	179.58	475.101	304.581	266.792	150.129		120.356	63.5383	60.3968	35.5741	70.8211	59.2594	0.95866
ENSG00000205352	54458	PRR13	proline rich 13		6.70613	6.68859	6.88932	5.60631	6.26057	16.1763	11.4526	14.8313	19.1656	18.9541	23.8385	26.4499	10.0631	8.12424	8.87883	7.13978	7.55411	8.62916		16.4094	26.4542	29.9957	40.6937	37.3555	38.0096	0.958533
ENSG00000142609	85452	CFAP74	cilia and flagella associated protein 74		0	0	0	0	0.475699	1.2237	1.52305	2.93001	2.53642	3.4635	4.86212	6.0321	1.75941	0.797593	0	0.445207	0	0		1.8544	5.62252	4.23897	3.33073	7.20519	11.5334	0.958409
ENSG00000128335	23780	APOL2	apolipoprotein L2		7.24737	2.03709	1.89977	2.91488	2.88636	13.5613	10.7598	11.0773	21.4433	36.6392	41.8607	59.7023	4.37723	6.88683	9.09422	5.61844	2.15923	6.31064		20.3722	28.6289	38.0371	38.5032	49.5932	92.7314	0.958259
ENSG00000184634	9968	MED12	mediator complex subunit 12		75.9754	105.984	90.4236	82.3231	58.8116	47.4225	27.1593	13.6452	17.9912	21.5658	28.0661	32.2684	134.482	77.6861	111.007	91.3306	88.5521	85.6432		45.8391	24.5749	18.0417	19.6154	20.5941	28.6272	0.958237
ENSG00000166888	6778	STAT6	signal transducer and activator of transcription 6		7.15309	4.08089	3.02827	2.93985	3.55429	35.3196	29.1489	38.5437	37.5837	35.8041	44.162	56.4215	22.7291	8.68324	9.97929	8.77373	4.63076	10.4537		26.0029	59.8985	43.0304	31.9234	54.8571	69.8994	0.958166
ENSG00000164663	25862	USP49	ubiquitin specific peptidase 49		52.6368	80.1629	58.4199	52.8298	45.4262	15.4387	14.2542	9.08034	8.75122	7.04097	9.99976	11.0398	129.89	101.666	100.775	86.5666	85.2479	75.9061		40.1671	21.4322	9.45963	13.9828	12.6278	16.7305	0.958143
ENSG00000130749	23211	ZC3H4	zinc finger CCCH-type containing 4		63.4686	98.3174	86.7184	106.558	94.6037	42.7959	41.2779	26.048	30.5952	27.9039	47.3105	36.0051	82.7788	67.8411	75.9514	78.813	86.8315	79.7641		32.6339	27.4112	32.2775	25.4426	26.0335	26.8009	0.958078
ENSG00000089094	84678	KDM2B	lysine demethylase 2B		92.8914	146.745	136.441	150.266	128.216	83.1612	47.4289	37.087	27.5829	30.0396	36.6352	37.3682	146.258	114.987	137.407	134.181	176.414	149.65		89.1903	35.1748	40.5189	31.7231	34.7657	38.127	0.957929
ENSG00000100129	51386	EIF3L	eukaryotic translation initiation factor 3 subunit L		881.248	1108.53	1329.7	992.886	695.834	486.646	267.617	238.893	173.745	172.779	200.644	198.993	596.884	586.988	762.243	700.897	741.348	522.556		368.217	168.535	207.952	155.903	179.161	189.078	0.957882
ENSG00000111752	1911	PHC1	polyhomeotic homolog 1		44.8083	58.5559	56.9453	48.7261	45.3885	24.9266	18.911	12.4574	7.42228	10.2538	12.272	12.6674	106.77	117.399	103.513	109.732	101.414	104.892		63.6504	39.9475	30.2405	27.1113	30.8717	37.8424	0.957878
ENSG00000168993	10815	CPLX1	complexin 1		5.24426	16.8281	21.7475	28.5668	29.2568	54.7982	135.159	233.915	252.17	227.03	311.467	292.205	1.47592	7.5325	6.39658	10.5062	16.0189	10.3458		31.5254	118.065	194.305	131.354	165.903	184.664	0.957753
ENSG00000118194	7139	TNNT2	troponin T2, cardiac type		0	0	0	0	0	0	0	0.542762	1.66123	5.50162	8.48808	14.1396	0.84938	2.79403	0.475216	0	0	0		0	1.89992	5.21121	6.98029	15.8049	42.5607	0.957735
ENSG00000043039	8538	BARX2	BARX homeobox 2		0	0	0	0	0	7.09075	5.37926	4.45483	2.00427	1.51994	1.28543	1.28	0	0	0	0	0	0		2.62988	3.40372	1.47932	0.559908	1.00952	0.83213	0.95771
ENSG00000241852	541565	C8orf58	chromosome 8 open reading frame 58		7.71926	8.89762	7.12245	11.0045	9.88524	10.7786	3.97467	1.2258	3.74427	1.99338	2.49955	2.65001	10.2691	9.14686	9.82593	8.48029	12.6023	11.1502		7.30045	4.11666	3.27966	2.55682	3.69744	3.49826	0.957494
ENSG00000171763	79029	SPATA5L1	spermatogenesis associated 5 like 1		19.4635	16.9564	16.8937	17.0384	15.1994	10.3092	7.24967	7.44949	5.39995	6.54332	5.45418	5.8355	21.6335	22.2759	20.0776	16.0856	17.4083	15.9735		12.6627	9.94153	6.84633	9.17835	7.15044	6.79673	0.957355
ENSG00000171291	90594	ZNF439	zinc finger protein 439		20.875	22.7738	21.4826	17.661	13.5442	5.21329	6.68916	5.57235	5.79287	4.67317	5.20579	7.46677	29.3966	39.5139	38.4118	32.0836	33.3546	29.1033		17.2873	10.6487	8.35033	11.3685	12.7421	8.96824	0.957314
ENSG00000139190	6843	VAMP1	vesicle associated membrane protein 1		1.7731	1.34999	0.972803	3.82924	2.40176	9.94046	11.9366	18.6409	21.9406	46.3247	62.2266	126.636	11.004	19.5518	11.1945	15.5971	16.2689	9.74771		23.4122	36.2567	57.8782	124.282	96.9744	176.696	0.957103
ENSG00000152942	5884	RAD17	RAD17 checkpoint clamp loader component		27.7648	30.4949	29.144	27.2051	31.4161	20.1994	19.8727	15.2827	13.9917	17.0687	20.8248	21.2696	46.7281	41.4353	39.7813	41.5079	39.0559	42.8885		32.1886	28.1286	27.8247	33.6769	35.3301	32.3861	0.957064
ENSG00000148019	84131	CEP78	centrosomal protein 78		40.5644	31.001	25.8294	23.9091	22.2794	7.82832	10.6507	8.26574	8.74177	5.89951	6.85673	7.35028	87.1012	54.5226	51.1087	45.4988	45.5813	46.2619		18.1841	14.3675	12.5511	16.9326	14.168	13.4983	0.957059
ENSG00000164053	84126	ATRIP	ATR interacting protein		14.6121	13.5011	13.2382	16.2767	12.9356	9.13583	6.33589	5.04581	5.71829	4.15902	5.31163	5.16201	19.1285	15.9263	18.6059	14.6396	15.6714	14.0898		7.52363	4.73077	5.58563	6.32251	4.9155	5.00944	0.957009
ENSG00000113758	1627	DBN1	drebrin 1		755.498	769.704	899.68	919.229	754.977	479.64	236.382	202.525	140.271	148.178	171.334	137.331	488.776	743.86	758.589	634.058	797.88	561.351		355.712	198.363	185.517	98.9306	114.59	148.765	0.95696
ENSG00000119986	60370	AVPI1	arginine vasopressin induced 1		2.88829	2.08686	2.42925	6.13807	4.19291	15.137	8.76959	10.308	15.519	11.4196	17.9024	23.8706	1.29718	1.39598	1.88288	2.12734	1.13376	1.93091		8.12294	10.5496	12.3938	16.3037	21.34	25.9367	0.956826
ENSG00000197122	6714	SRC	SRC proto-oncogene, non-receptor tyrosine kinase		110.282	204.491	187.182	186.004	151.465	75.5173	55.9731	50.0507	33.6566	29.3154	45.8527	42.3599	107.435	136.934	183.375	172.028	141.767	153.325		86.2422	59.2283	51.5356	27.6685	36.4338	53.9556	0.956818
ENSG00000090924	64857	PLEKHG2	pleckstrin homology and RhoGEF domain containing G2		41.2652	70.5254	45.0795	72.0897	58.0646	46.3497	14.323	3.08419	4.75749	5.56399	5.21258	4.07283	137.962	102.108	102.035	92.8935	127.988	103.952		51.6684	13.4697	6.7342	4.61247	4.46691	5.10743	0.956465
ENSG00000163703	78987	CRELD1	cysteine rich with EGF like domains 1		20.9936	24.9395	27.6531	35.1623	31.834	67.0017	61.6123	97.203	76.7351	87.3007	74.6521	95.0152	32.1932	47.4206	40.5232	42.7053	49.6129	46.0524		58.8487	115.646	105.936	100.119	107.534	114.616	0.956292
ENSG00000152782	53354	PANK1	pantothenate kinase 1		32.3309	28.4099	29.1228	18.978	19.3309	8.80057	17.3615	17.7474	9.69023	11.5891	12.0773	12.1181	50.5645	30.4662	29.9343	35.474	23.6633	23.3809		19.659	18.4647	12.7165	10.3214	12.8177	13.2274	0.956284
ENSG00000133422	22880	MORC2	MORC family CW-type zinc finger 2		76.4885	102.234	110.979	86.9323	78.8536	45.9474	31.7817	29.8579	21.3294	25.5423	29.7768	29.4486	104.314	102.983	122.514	107.18	109.936	95.9199		64.737	45.1437	37.3328	32.56	35.5255	38.1931	0.956282
ENSG00000177733	10949	HNRNPA0	heterogeneous nuclear ribonucleoprotein A0		741.34	695.926	709.442	453.521	363.58	182.432	153.403	148.282	103.747	129.128	140.579	119.556	582.439	530.138	554.564	434.787	433.835	391.477		184.397	122.678	132.346	114.899	120.868	114.393	0.956164
ENSG00000121774	10657	KHDRBS1	KH RNA binding domain containing, signal transduction associated 1		509.225	496.53	538.323	327.204	333.268	160.338	147.406	152.128	102.233	84.6919	123.654	106.581	486.724	454.248	451.549	404.989	400.54	334.029		184.325	128.037	155.608	146.082	129.34	115.896	0.956123
ENSG00000141562	26502	NARF	nuclear prelamin A recognition factor		134.128	133.687	119.432	153.401	108.393	112.966	51.0939	59.023	71.6822	49.7789	52.0434	57.3271	111.938	194.651	182.792	149.489	167.989	144.946		73.844	65.0775	62.4952	64.8977	69.5499	67.698	0.956044
ENSG00000161202	1857	DVL3	dishevelled segment polarity protein 3		136.995	152.597	147.576	172.4	139.71	136.903	92.6784	80.9513	75.4159	59.065	82.6039	77.8494	127.132	131.687	154.519	147.066	149.624	142.633		114.342	69.4398	66.6244	57.2247	64.3337	72.5283	0.95602
ENSG00000196975	307	ANXA4	annexin A4		3.48869	3.30146	2.762	2.23464	2.3228	8.26416	9.48881	7.52154	13.3688	14.8291	14.0284	14.6126	5.93708	3.82641	4.45162	3.79391	3.13413	4.64131		7.94738	11.8096	13.6674	20.4907	17.3729	16.884	0.956013
ENSG00000132016	79173	C19orf57	chromosome 19 open reading frame 57		10.9095	17.1455	19.2318	30.033	25.9285	21.0376	7.47901	4.66843	4.35367	2.09237	3.52629	3.4934	13.0444	21.3377	22.5945	23.2562	29.7417	30.1267		12.6061	4.18167	5.73885	3.79908	4.86942	4.95406	0.955995
ENSG00000183780	148641	SLC35F3	solute carrier family 35 member F3		0	1.17642	1.90155	2.01386	2.23568	5.04566	8.82754	19.9328	13.7991	14.3784	23.4406	25.2851	1.99002	1.95645	1.32488	4.68648	2.28945	1.77709		6.48508	23.8225	25.5725	18.5688	24.9215	30.0589	0.955993
ENSG00000135324	112609	MRAP2	melanocortin 2 receptor accessory protein 2		1.22008	1.51043	1.40638	2.0336	2.86771	11.7509	5.83488	17.3307	17.8805	21.6205	25.5288	38.9773	1.63392	2.06311	1.07333	2.57998	6.29649	2.05588		9.79598	19.909	21.121	15.1954	25.7019	30.7433	0.955966
ENSG00000152439	374928	ZNF773	zinc finger protein 773		4.57563	5.9998	5.81303	6.16015	5.46282	3.63757	2.43565	2.94864	1.57058	1.69856	2.60927	2.50602	5.54252	6.03883	7.32095	7.91264	8.71956	8.01437		5.00543	3.5393	2.73508	2.96158	2.93538	3.99305	0.955879
ENSG00000044524	2042	EPHA3	EPH receptor A3		16.3867	39.7114	54.2053	107.386	82.6265	12.2202	16.0681	24.1759	6.12881	9.42006	11.5917	10.7809	55.1938	53.4514	23.4164	88.0771	282.045	207.932		26.6304	13.0661	12.4192	8.2469	9.99757	10.6564	0.955876
ENSG00000239911	---	---	---		5.11801	1.19346	2.30751	3.33218	6.21826	25.53	14.5446	18.594	27.1347	12.891	17.9612	18.2671	0.984999	2.58002	2.86527	4.41594	7.63182	5.2889		12.7372	24.0342	30.529	16.7418	25.3367	26.2775	0.955849
ENSG00000212747	441518	RTL8B	retrotransposon Gag like 8B		20.4183	25.5775	22.1127	22.0087	19.988	19.2607	10.6126	6.52414	9.37973	10.6577	10.161	9.00672	21.4147	25.0845	24.7015	22.3898	26.3856	20.6547		13.6228	10.1996	9.48885	14.9531	10.8349	10.2114	0.955841
ENSG00000177301	3737	KCNA2	potassium voltage-gated channel subfamily A member 2		1.2074	3.3297	2.40968	2.79645	3.33711	4.50925	22.0603	31.1747	23.5853	37.5205	53.1568	72.4984	0.566526	2.96054	3.39195	6.83405	4.61594	7.41682		10.0816	23.9736	33.006	40.2927	42.4963	58.7066	0.955833
ENSG00000056661	---	---	---		74.0434	79.4233	81.0801	78.6824	71.673	77.1265	31.1442	18.1538	22.5714	14.4073	17.841	17.8793	98.9318	152.854	161.294	122.022	152.491	110.893		88.276	35.0473	37.7198	27.5128	28.3731	34.6883	0.955694
ENSG00000196363	11091	WDR5	WD repeat domain 5		79.8046	60.9392	60.6579	80.4141	68.5557	56.7427	41.7028	40.6783	28.3935	28.5609	38.9476	39.3916	93.9542	88.6816	83.5762	70.4291	84.2158	72.5017		56.2741	53.6407	47.4269	42.6601	47.3962	49.4113	0.955609
ENSG00000178015	285601	GPR150	G protein-coupled receptor 150		0	0	0	0	0	2.02832	0.404865	1.13188	0.983589	2.21679	3.42448	4.69194	0	0	0	0	0	0		0.611198	0.627915	0.880421	1.05784	2.02844	4.38416	0.955486
ENSG00000187607	57335	ZNF286A	zinc finger protein 286A		13.9076	18.7414	21.2543	16.5108	15.3442	4.50925	3.04469	1.70507	1.87068	1.27939	2.14612	1.57999	24.5232	22.8665	22.5012	24.0007	27.0247	23.5989		10.6265	4.50876	2.43258	3.65093	3.16241	3.14037	0.955411
ENSG00000225335	---	---	---		0	0	0	0	0	0	0	0	0	0.525885	0.457813	0.480548	0	0	0	0	0	0		0	0	0	0.405453	0.44096	0.678613	0.955253
ENSG00000010282	57467	HHATL	hedgehog acyltransferase like		0	0	0	0	0	0	1.06554	13.2178	24.3649	27.7185	36.9201	43.7844	0	0	0	0	0	0		0.462293	8.69304	29.4366	56.1732	45.8999	53.4422	0.955161
ENSG00000157657	114991	ZNF618	zinc finger protein 618		106.346	54.3226	37.4418	36.4479	24.9028	10.0746	9.5706	4.64728	4.71683	4.59618	7.08262	7.07264	231.224	124.367	77.7126	81.778	44.9237	46.6653		24.6925	8.37002	8.58211	7.3422	6.90839	7.779	0.955091
ENSG00000047410	7175	TPR	translocated promoter region, nuclear basket protein		124.766	130.174	121.655	94.2816	113.065	59.4919	69.1735	63.0273	36.1753	35.8417	66.8548	65.0783	333.948	182.28	202.584	210.278	164.16	180.779		132.172	85.1621	76.6525	70.3867	83.2337	89.4449	0.954905
ENSG00000172766	79612	NAA16	N(alpha)-acetyltransferase 16, NatA auxiliary subunit		21.5852	11.8579	11.8065	13.6798	13.0433	2.46416	5.12995	5.00449	4.73777	3.54592	4.14763	5.59072	78.71	62.8681	43.985	31.3854	35.2576	36.8491		19.7292	18.9813	8.89072	16.3818	17.0471	12.9402	0.954904
ENSG00000118308	4033	LRMP	lymphoid restricted membrane protein		0.513934	1.29267	0.986996	0.532094	0.833366	2.1289	2.97312	6.34139	4.63263	8.92173	8.67375	11.5004	0.559611	0.47979	1.01207	1.18091	0.493592	1.16038		5.2641	7.11803	5.06015	9.37689	15.6282	19.7088	0.954898
ENSG00000168066	7536	SF1	splicing factor 1		292.859	339.384	344.383	332.606	297.589	228.195	161.77	171.168	153.744	158.763	185.78	186.466	446.869	347.19	381.046	345.968	348.145	305.68		222.221	194.937	218.364	234.054	217.105	202.422	0.954775
ENSG00000261754	---	---	---		3.22119	4.22049	3.29521	1.55725	1.12043	0	0	0	0	0	0	0	6.93921	6.55053	5.32745	5.18756	1.72846	2.54917		0.950806	0	0	0	0	0	0.954747
ENSG00000198521	7594	ZNF43	zinc finger protein 43		32.1743	32.031	27.4803	22.3197	19.5176	6.72196	9.57825	6.08255	5.57584	4.51815	9.15632	6.61312	90.8154	52.4378	42.1339	39.5404	34.5484	42.2857		14.2535	9.41713	7.0153	10.9849	8.36669	10.307	0.954683
ENSG00000172301	55352	COPRS	coordinator of PRMT5 and differentiation stimulator		29.0618	26.5818	32.0917	39.0527	36.5311	70.9913	66.2721	77.1286	94.896	71.8316	92.7007	81.4744	27.693	32.3076	28.0421	29.231	23.3196	28.6066		55.051	85.5948	106.645	81.7513	104.957	115.23	0.954679
ENSG00000176371	54993	ZSCAN2	zinc finger and SCAN domain containing 2		26.6503	50.1155	50.4758	47.515	32.8472	10.8792	7.86459	5.94106	5.2849	4.58721	4.77499	5.12324	27.0995	29.1311	38.908	39.7084	47.3766	40.4435		16.5323	5.81827	5.66222	4.58021	4.59726	4.37214	0.954411
ENSG00000141384	6875	TAF4B	TATA-box binding protein associated factor 4b		2.23018	1.42656	1.22907	1.00995	0.716093	1.89422	3.08528	6.75954	2.57579	7.53255	9.85946	14.0366	8.40829	1.99613	2.23892	4.1472	2.43258	1.95531		3.38938	8.57264	5.84456	6.52123	9.75373	14.4584	0.954386
ENSG00000163121	93082	NEURL3	neuralized E3 ubiquitin protein ligase 3		0	0	0	0	0	1.15665	0.624524	0.609563	0.599921	0	0.546281	0.58948	0	0	0	0	0	0		0.853338	0.681791	0.790244	0	0.415806	0.461568	0.954275
ENSG00000162241	283130	SLC25A45	solute carrier family 25 member 45		0	0.60692	0.494247	1.01377	0.805717	1.9948	2.3732	3.02376	4.04393	5.0581	7.09075	6.24629	0	0	0.54747	0.534077	0	0.68488		1.29402	2.03465	4.59427	5.8743	5.87778	7.66617	0.95408
ENSG00000126883	8021	NUP214	nucleoporin 214		63.2323	77.5887	68.1474	75.5511	67.0257	59.5589	47.1232	40.9106	38.1113	42.5071	47.4039	46.2851	119.793	70.714	85.7526	85.3384	83.8514	84.6284		59.3826	45.3806	42.5987	43.9214	42.5466	44.4142	0.954021
ENSG00000007516	8938	BAIAP3	BAI1 associated protein 3		3.73786	6.88896	6.60273	13.0201	15.827	43.1312	25.851	47.4217	27.292	36.0145	77.3871	185.482	15.5397	46.463	15.0131	31.8496	11.1353	16.3454		33.6121	38.9926	48.0065	22.6213	78.3231	204.591	0.954002
ENSG00000151025	57512	GPR158	G protein-coupled receptor 158		1.77384	2.31413	2.64787	4.61572	7.07483	12.9578	49.9079	117.576	59.9298	97.5868	118.295	132.211	0.814791	3.3225	1.65955	7.34206	4.1663	7.38491		21.8152	108.201	81.2564	64.1423	94.1438	104.033	0.953859
ENSG00000181090	79813	EHMT1	euchromatic histone lysine methyltransferase 1		103.949	134.96	115.738	136.866	99.4152	53.893	46.2651	22.9395	33.1128	22.0208	35.1134	26.8273	169.46	133.153	123.888	110.838	119.251	112.726		61.8106	43.207	30.8802	36.1712	33.0951	32.3161	0.953798
ENSG00000140455	9960	USP3	ubiquitin specific peptidase 3		80.2343	81.0837	76.6759	45.0655	36.2322	17.3832	11.3926	5.2666	7.46239	6.26149	5.49977	3.72482	83.8812	116.198	137.736	92.5652	95.9126	74.8194		44.1715	22.4859	11.0171	15.3484	13.5032	10.3505	0.95377
ENSG00000143748	4931	NVL	nuclear VCP like		47.5707	28.6808	28.6527	28.1905	22.0345	8.46531	7.14846	6.50309	7.50767	4.62172	5.95454	6.75688	62.7115	57.1932	51.436	45.1492	44.7613	41.4007		24.9517	17.247	18.148	25.3996	22.0083	18.0693	0.953516
ENSG00000101413	58490	RPRD1B	regulation of nuclear pre-mRNA domain containing 1B		57.1997	58.6385	51.2628	41.2217	40.608	24.826	22.0468	22.6467	17.9585	22.8553	27.6371	28.5188	72.9008	49.5378	50.9085	46.8369	40.9526	42.4548		31.9367	33.686	22.7751	29.3633	27.7349	28.4782	0.953322
ENSG00000233426	---	---	---		47.1177	38.0919	41.6899	31.5219	26.854	26.2006	15.0244	15.001	17.5122	10.3933	12.9109	11.8983	26.1412	21.4308	24.1155	26.4797	18.4368	16.146		10.4126	8.77542	8.14131	7.50596	7.17945	7.65983	0.953284
ENSG00000166004	85459	CEP295	centrosomal protein 295		19.2813	18.087	14.6038	17.0857	18.7669	8.90115	11.6549	11.4172	6.29851	8.21833	10.1396	12.2431	70.4292	40.7279	33.2979	36.0568	41.2544	40.0842		26.3772	22.2481	14.565	19.0072	21.2237	25.0629	0.953229
ENSG00000067066	6672	SP100	SP100 nuclear antigen		1.71945	1.96977	1.60166	1.3605	1.58292	9.57167	6.5422	5.01634	7.02095	4.77451	4.24004	4.56648	1.40777	1.40959	2.40611	1.8411	1.01843	2.12875		8.95394	9.56366	8.63552	6.60685	6.43546	5.81019	0.953203
ENSG00000106635	9275	BCL7B	BAF chromatin remodeling complex subunit BCL7B		35.9537	29.4083	27.8181	35.2329	29.7076	31.7659	47.776	61.4983	74.9056	67.8637	74.3238	72.5162	29.9508	29.1897	29.2919	31.6104	30.9881	31.2528		31.2093	65.0136	75.3603	59.1179	74.8248	76.8759	0.953079
ENSG00000168246	92181	UBTD2	ubiquitin domain containing 2		113.541	133.135	124.03	82.3048	74.6484	33.241	33.2848	25.2089	16.4356	14.2149	21.9675	19.0606	125.69	101.889	118.754	119.604	111.457	100.708		52.2347	29.2221	22.6325	22.0023	23.1563	17.6836	0.95305
ENSG00000117594	3290	HSD11B1	hydroxysteroid 11-beta dehydrogenase 1		0	0	0	0	0	0.586705	0	0.918054	0.9371	1.56701	2.24645	6.64753	0	0	0	0	0	0		0.562254	1.06995	0.597336	2.58068	3.70726	5.94891	0.952981
ENSG00000144580	9125	CNOT9	CCR4-NOT transcription complex subunit 9		107.735	81.0055	80.3187	76.0241	69.0939	59.8271	55.4594	45.209	42.6987	38.5444	39.1828	40.2752	115.192	89.38	79.7763	76.9367	86.5886	73.4157		59.2029	54.4914	46.2274	50.7389	48.5219	46.5843	0.952971
ENSG00000101052	51098	IFT52	intraflagellar transport 52		70.3056	67.6115	81.4135	53.3786	56.2322	43.7682	32.3173	28.4934	24.6968	25.6491	19.2726	19.0542	68.019	63.1542	63.2871	61.9313	48.1879	47.4891		42.7458	22.837	28.6102	23.277	26.5542	23.1505	0.952674
ENSG00000162302	8986	RPS6KA4	ribosomal protein S6 kinase A4		6.65269	5.54803	4.86573	13.4963	15.5261	39.9797	43.2105	84.5199	73.5114	59.7469	73.1386	57.6502	6.36591	9.24212	7.3739	9.73192	8.56534	12.8707		26.1228	45.3665	60.5442	50.0758	49.3462	46.2801	0.952646
ENSG00000107147	57582	KCNT1	potassium sodium-activated channel subfamily T member 1		0.73221	2.5095	2.34328	11.1217	18.7747	35.5543	30.2413	44.7158	33.3843	42.1839	68.3867	98.2648	0.416501	6.97313	2.61109	7.80211	13.5062	14.7148		40.2316	88.82	90.0489	79.5599	113.416	141.437	0.952522
ENSG00000197935	282890	ZNF311	zinc finger protein 311		5.03102	8.92729	9.42169	9.25934	8.35873	3.36936	1.9167	1.01582	0.639712	0.472178	0.517496	0.415359	12.0146	15.4368	14.5622	15.1149	17.6785	15.603		6.38883	2.07911	1.51759	2.15168	1.2289	0.940949	0.95252
ENSG00000130684	26152	ZNF337	zinc finger protein 337		3.24706	3.71799	2.59246	6.09871	3.99245	2.63179	1.25832	1.20691	0.754803	1.27198	1.49224	1.79057	45.5769	87.4844	115.734	87.5005	202.099	143.056		78.2718	57.8438	34.0073	36.2645	39.8746	41.9642	0.952366
ENSG00000179387	255520	ELMOD2	ELMO domain containing 2		57.8283	43.9732	44.9864	18.2028	19.4622	8.02947	12.762	10.8609	8.51787	14.5684	14.5432	12.0617	70.2809	59.5595	50.0277	42.94	25.8088	37.9004		13.3488	16.7118	14.8172	21.1452	19.1766	18.5381	0.95224
ENSG00000196152	7633	ZNF79	zinc finger protein 79		5.1422	8.453	7.96867	9.07384	6.20669	2.46416	2.27176	4.22256	3.08119	3.87075	3.69205	3.28127	6.75643	4.32575	7.33771	7.20239	8.73327	7.23528		3.19823	3.97239	3.90221	3.60374	3.61987	4.05173	0.952142
ENSG00000175455	64770	CCDC14	coiled-coil domain containing 14		56.791	34.9042	36.3459	45.1356	40.7006	17.3497	21.5019	13.9656	13.2903	6.08406	12.7209	15.2881	288.561	272.383	200.598	141.303	164.574	204.43		77.8881	60.7223	38.8214	48.6115	51.1593	46.4287	0.952052
ENSG00000157796	57728	WDR19	WD repeat domain 19		31.2212	31.8136	27.2757	38.9495	39.7574	29.4191	17.058	15.9124	7.80461	11.5604	15.1192	19.6645	85.2057	76.7496	72.2667	71.081	81.2881	82.779		59.4498	34.9899	22.4181	27.449	37.589	47.3489	0.952029
ENSG00000247796	257396	LOC257396	uncharacterized LOC257396		0	0	0	0	0	0	0	0.454949	0.558649	0.562045	0.680389	0.58931	1.57132	1.36137	1.34337	1.41832	1.35784	1.04507		1.04069	3.29015	2.67407	3.12626	4.21318	4.28189	0.951868
ENSG00000248774	---	---	---		0.899025	0	0	0	0	0	0	0	0	0	0	0.436738	0.665588	0.523985	0	0	0	0		0	0	0	0	0	0.475492	0.951771
ENSG00000171456	171023	ASXL1	ASXL transcriptional regulator 1		120.994	154.956	132.369	146.583	145.813	95.7335	56.647	40.0497	38.7395	29.1307	48.5993	56.0821	210.629	177.735	185.45	176.225	207.118	187.061		131.411	66.827	56.272	63.0386	58.5714	63.664	0.951687
ENSG00000165506	55172	DNAAF2	dynein axonemal assembly factor 2		31.2027	22.6206	30.6128	20.6019	19.5415	11.1809	13.2934	11.1249	13.6081	9.79787	10.1756	8.95726	37.1936	28.5273	21.0745	21.7192	19.2054	19.2965		10.7233	9.89926	8.76321	8.66157	9.58904	9.22719	0.951633
ENSG00000197724	5253	PHF2	PHD finger protein 2		127.226	197.526	174.353	145.057	118.958	77.73	64.0668	34.4669	40.5342	29.9453	46.3368	41.0039	119.161	145.559	172.149	171.362	168.851	159.748		95.7943	56.546	46.9928	48.5711	41.6975	41.8224	0.951467
ENSG00000121210	23240	TMEM131L	transmembrane 131 like		64.0325	51.2849	54.4568	56.6764	47.4427	7.12427	5.08177	4.51989	1.89027	4.21662	4.43156	5.69923	76.946	61.6174	67.023	61.5858	50.742	69.9809		22.2151	11.0421	9.14361	9.34276	8.48196	8.18585	0.951333
ENSG00000153283	10225	CD96	CD96 molecule		0	0	0	0	0	0	0	0	0.51382	1.04373	0	0	0	0	0	0	0	0		0	0	0.642786	0.699167	0	0	0.951308
ENSG00000166526	7551	ZNF3	zinc finger protein 3		50.1628	47.8825	51.2405	53.0309	38.8839	16.3104	17.8421	10.3574	19.3715	13.2333	13.6807	13.357	69.5516	73.18	73.9733	64.9439	65.5697	66.1815		32.0182	18.7584	18.1542	32.6536	20.9942	21.2775	0.951255
ENSG00000198168	258010	SVIP	small VCP interacting protein		21.4036	4.98104	3.90416	2.24579	1.77722	4.87803	7.75462	15.1988	19.166	29.8668	34.7878	44.5786	27.9603	19.4745	12.9144	7.22259	6.82646	3.4314		5.85866	18.8234	31.0743	58.3363	56.6508	61.2917	0.951215
ENSG00000077097	7155	TOP2B	DNA topoisomerase II beta		808.275	980.281	1002.16	541.872	696.354	195.607	197.527	208.88	112.212	129.316	200.517	173.832	649.9	758.979	788.686	781.334	716.98	680.337		372.965	201.26	215.374	207.378	232.3	223.496	0.951012
ENSG00000113580	2908	NR3C1	nuclear receptor subfamily 3 group C member 1		12.577	9.9201	5.91535	3.19589	6.95095	24.1219	47.5456	65.1654	52.5262	63.5112	85.8389	90.3796	11.2991	10.8863	10.8413	13.1816	14.1136	13.2602		23.51	49.2274	45.9296	70.0557	80.9025	78.6833	0.950854
ENSG00000006704	9569	GTF2IRD1	GTF2I repeat domain containing 1		45.0039	49.2097	47.0464	57.1147	41.9336	25.3289	12.3077	8.39089	10.4236	9.25242	14.7483	11.9594	70.1345	71.9236	64.6237	57.0048	63.8276	49.734		29.2536	21.7494	15.5543	15.9488	13.4501	16.7834	0.950767
ENSG00000020256	55734	ZFP64	ZFP64 zinc finger protein		34.1078	34.2655	34.9426	31.6841	25.1327	17.5509	15.6587	14.4441	11.2083	12.9195	19.24	18.5144	32.9926	29.4135	35.4724	34.5429	34.6332	25.5662		21.0143	13.5956	16.1831	13.2461	18.3936	17.2284	0.950709
ENSG00000167549	84940	CORO6	coronin 6		0.455927	0	0	0.898947	1.50922	22.1774	18.54	13.2565	24.9128	14.0829	23.3345	38.6962	4.0047	3.1358	1.62887	2.02391	1.17082	2.19956		36.1081	49.5616	74.504	79.0831	88.3497	126.196	0.950561
ENSG00000122565	11335	CBX3	chromobox 3		319.636	217.922	283.329	176.654	208.45	96.5046	124.055	79.4491	77.5794	59.4423	76.7938	57.9783	365.405	380.524	342.931	289.753	280.831	286.603		160.611	108.515	100.503	103.749	112.037	99.2074	0.95055
ENSG00000184677	9923	ZBTB40	zinc finger and BTB domain containing 40		40.5288	64.2497	55.0262	54.7063	40.0906	19.6295	23.1339	19.2768	16.4916	13.5028	23.2888	30.5649	86.3493	59.6033	85.4024	80.0916	71.429	71.0022		37.1749	35.5877	30.7828	27.3297	29.9156	31.609	0.950477
ENSG00000111335	4939	OAS2	2'-5'-oligoadenylate synthetase 2		0.694275	1.74121	1.1499	2.72503	1.75855	12.6561	8.84907	10.0399	4.20876	5.70551	5.36786	5.32597	0.815222	0.535529	1.32028	1.8354	0.86824	2.43126		6.64934	8.01785	4.8646	4.69402	4.85764	5.00658	0.950451
ENSG00000153574	22934	RPIA	ribose 5-phosphate isomerase A		20.1837	16.9099	17.9155	19.5587	18.5018	11.8514	9.23511	8.74858	8.14274	4.59929	7.13874	5.41107	31.6045	26.0003	23.5397	19.5524	22.1069	21.7697		15.9169	13.9249	10.12	11.138	11.4866	8.39549	0.950222
ENSG00000181541	10586	MAB21L2	mab-21 like 2		2.14381	0	0	0	0	0	0	0	0	0	0	0	20.9724	7.38448	0	2.35611	0	0		0	0	0	0	0	0	0.950214
ENSG00000103194	9100	USP10	ubiquitin specific peptidase 10		135.662	158.357	174.234	132.885	130.052	80.2444	62.1327	67.2946	41.3095	54.4976	72.3473	61.0638	167.384	121.081	138.949	138.131	141.771	125.232		87.0601	71.5232	57.4803	54.4268	63.3385	71.7802	0.9502
ENSG00000184307	254887	ZDHHC23	zinc finger DHHC-type containing 23		2.70738	4.17926	2.81107	3.80199	5.43352	21.4399	26.5219	33.3501	17.5717	19.5396	23.6657	40.3048	5.85872	6.51842	4.68006	12.7046	8.2638	9.15241		36.6393	58.0432	38.9489	25.286	50.0929	57.2194	0.950173
ENSG00000106459	4899	NRF1	nuclear respiratory factor 1		51.0846	30.6186	33.6451	34.6461	27.9822	19.5289	23.6777	16.1652	12.6244	12.2393	14.6908	14.1654	43.2034	41.0112	35.3373	32.4188	34.2155	34.0201		31.5661	27.1228	22.4186	21.4504	22.4573	22.7274	0.950045
ENSG00000255020	100129129	LOC100129129	uncharacterized LOC100129129		0	0	0	0	0	0	0.437974	0	0.897151	0.632432	0.745964	1.1614	0	0	0	0	0	0		0	0	0.85601	0.550825	0.513137	1.05728	0.949906
ENSG00000148843	22984	PDCD11	programmed cell death 11		77.6453	92.0951	84.9465	78.37	66.0227	23.3844	30.5234	51.1542	20.0831	22.6361	30.0095	31.4772	134.616	76.8715	86.3318	77.3069	74.8859	68.6604		46.496	34.1112	30.6374	24.185	28.4906	32.6306	0.949758
ENSG00000109685	7468	NSD2	nuclear receptor binding SET domain protein 2		388.133	274.43	246.281	255.341	231.736	110.787	107.671	113.871	55.1634	69.4389	103.469	102.527	652.883	363.589	337.855	325.976	301.441	290.093		170.298	108.833	103.452	78.3401	91.1197	107.099	0.949752
ENSG00000006071	6833	ABCC8	ATP binding cassette subfamily C member 8		1.53235	3.23435	3.07862	17.1122	18.4968	27.6086	24.2251	22.861	16.4391	22.6078	36.3141	53.5703	7.61725	15.116	12.5889	17.3013	41.9882	26.6368		50.9419	47.0874	49.9845	42.6472	54.6056	94.3536	0.949742
ENSG00000196670	643836	ZFP62	ZFP62 zinc finger protein		59.4104	68.026	62.0835	48.7018	44.0444	15.0699	16.9283	10.9596	14.2552	6.85839	14.2299	16.5212	74.9792	75.5479	86.9718	83.8683	92.7795	76.0868		36.4417	25.7544	22.5545	25.6835	25.5784	24.7041	0.949628
ENSG00000066135	9682	KDM4A	lysine demethylase 4A		90.4807	148.149	148.951	117.498	110.696	45.7462	37.8919	44.7879	22.9471	28.3518	34.4027	39.4021	107.585	109.376	135.575	142.629	147.197	136.71		77.8551	51.5728	47.2795	38.907	42.4782	55.7554	0.949618
ENSG00000197362	136051	ZNF786	zinc finger protein 786		10.8261	16.7341	15.8585	21.8523	15.4097	5.34739	5.83091	7.69852	4.06048	4.33658	8.568	9.08281	14.2334	13.8073	15.6609	14.3631	16.7693	14.3384		7.09106	9.72142	7.62092	5.20802	9.41506	10.2105	0.949583
ENSG00000254827	5003	SLC22A18AS	solute carrier family 22 member 18 antisense		0	0	0	0	0	0	0	0	0	0	0.57272	0.443471	0	0	0	0	0	0		0	0	0	0	1.01236	1.41001	0.949478
ENSG00000004487	23028	KDM1A	lysine demethylase 1A		425.362	410.237	489.134	303.644	275.251	144.313	83.3288	96.722	56.206	58.6292	61.612	69.808	376.065	402.416	415.982	324.272	302.419	271.106		167.018	108.046	86.8644	71.2681	78.8223	88.6762	0.949387
ENSG00000261033	---	---	---		0	0	0	0	0	0.921965	0.926874	1.39082	2.73161	1.76098	1.34323	1.24555	0	0	0	0	0	0		0.565054	1.26825	2.86373	1.89297	2.20485	1.98194	0.949264
ENSG00000138413	3417	IDH1	isocitrate dehydrogenase (NADP(+)) 1, cytosolic		204.625	216.754	284.992	176.562	198.071	68.5774	64.8729	29.2931	35.1885	28.0967	27.7096	18.1173	191.688	182.129	189.734	190.211	180.525	170.103		113.303	55.9535	27.5227	29.784	28.2871	24.9017	0.949143
ENSG00000184678	8349	HIST2H2BE	histone cluster 2 H2B family member e		64.4708	53.0882	43.3653	20.4391	14.7842	37.9347	24.7179	15.7293	22.2126	22.9995	15.0509	15.2183	65.9994	77.719	69.2677	60.9427	27.3944	27.7548		39.8597	36.7033	23.0759	39.1573	22.96	14.9172	0.94901
ENSG00000163006	165055	CCDC138	coiled-coil domain containing 138		15.6301	8.59965	8.24153	6.82091	8.2176	7.69421	4.52656	3.66438	2.12819	1.98918	1.94193	2.76964	40.0892	19.7609	14.8497	13.1838	10.5429	13.4077		11.7931	5.44763	5.14595	6.24851	5.73065	4.81143	0.948971
ENSG00000106484	4232	MEST	mesoderm specific transcript		107.808	37.4108	36.3173	35.667	34.7799	81.552	54.3407	39.7323	16.1911	14.1717	25.0955	25.6207	521.597	168.699	75.5242	81.4161	42.5904	53.0918		78.1173	47.1658	25.9329	18.293	19.3617	22.7108	0.948937
ENSG00000140044	122953	JDP2	Jun dimerization protein 2		3.77684	2.04991	1.46838	2.3617	4.32392	22.7474	28.7099	31.9763	28.212	22.5281	24.6029	19.506	3.29855	4.39866	3.95235	5.37926	1.68675	3.49351		28.5932	46.5443	31.2592	18.8177	23.1276	25.2721	0.948824
ENSG00000122779	8805	TRIM24	tripartite motif containing 24		214.964	205.686	208.673	105.449	109.472	38.8734	39.2829	33.5667	24.4571	19.3328	27.4124	24.1956	291.275	187.37	201.753	144.054	141.8	129.924		63.3589	34.9749	31.3538	29.4504	30.8177	25.8091	0.948808
ENSG00000162769	28982	FLVCR1	feline leukemia virus subgroup C cellular receptor 1		20.2608	19.1798	17.1115	14.3253	14.5632	3.57052	5.94354	6.24445	4.28358	5.97068	5.53609	5.71602	59.1369	49.7186	35.7161	30.5978	35.7712	34.8052		18.9884	17.6851	9.47941	13.3656	11.7177	12.1163	0.948753
ENSG00000083896	91746	YTHDC1	YTH domain containing 1		123.555	121.202	132.703	98.666	118.39	70.3543	58.8238	64.7904	51.8822	58.0079	65.4284	64.9495	163.376	157.29	147.024	144.365	142.597	147.977		103.978	91.3767	72.7893	84.3398	85.2127	81.9131	0.948553
ENSG00000100918	9985	REC8	REC8 meiotic recombination protein		109.676	55.5135	57.9957	88.4683	77.0888	39.7786	40.8165	13.8313	21.1142	10.9419	13.41	12.5507	130.374	183.673	154.785	118.71	147.168	125.727		62.4922	31.5478	35.4263	34.0659	22.6869	22.5358	0.948489
ENSG00000272505	---	---	---		0.931626	5.62547	4.17269	9.60207	5.98975	6.35317	2.37794	0.506928	0.943028	0.733489	1.40369	1.3074	2.13548	14.2488	28.4237	22.6666	73.4043	34.3325		20.3476	12.0381	6.37919	9.77387	9.7042	11.7025	0.948488
ENSG00000103460	27324	TOX3	TOX high mobility group box family member 3		48.7464	60.06	63.2157	59.4508	64.0956	22.5127	11.2639	8.47732	3.72894	9.19954	8.88235	6.28358	80.0716	62.9339	47.6927	66.8868	61.4821	76.2321		32.0536	9.10643	9.64148	9.28268	7.56859	6.851	0.948462
ENSG00000179967	---	---	---		38.7476	35.0146	49.6487	50.3853	33.8774	18.0537	8.46842	4.61942	10.9663	5.2028	3.56206	2.73349	8.81026	14.637	17.2717	18.3632	16.5994	16.2012		8.58473	4.45492	3.16649	3.69137	2.64801	2.30469	0.948453
ENSG00000189157	100129583	FAM47E	family with sequence similarity 47 member E		0	0	0	0.888237	2.00464	2.73237	4.14039	3.5458	5.18621	6.83356	6.01177	8.74901	2.62204	2.26163	0.886112	1.75329	1.3843	2.34484		4.07299	6.58886	10.0189	12.0084	14.1108	16.028	0.948358
ENSG00000160679	26097	CHTOP	chromatin target of PRMT1		134.345	95.8166	116.974	113.57	107.706	87.9554	61.6484	62.8154	62.6854	50.8198	55.0846	56.8955	184.7	187.479	167.397	155.299	174.792	160.541		106.729	95.9171	88.3194	105.656	96.5493	86.7612	0.948296
ENSG00000140092	10516	FBLN5	fibulin 5		4.52324	3.68612	1.88759	1.79557	2.86435	32.9728	23.2344	20.6078	18.7655	14.8676	14.9038	19.2557	8.40262	4.83718	7.10509	7.86183	1.5166	2.73141		21.2052	21.2055	21.8285	12.251	16.895	16.4885	0.948134
ENSG00000183337	54880	BCOR	BCL6 corepressor		88.5065	112.344	90.307	71.9076	51.443	29.1173	15.6305	17.498	9.28236	16.1695	22.3244	24.6493	125.422	124.048	153.723	85.4205	103.655	94.8908		34.8254	30.0388	20.0218	22.6132	21.0533	20.661	0.948133
ENSG00000135596	64780	MICAL1	microtubule associated monooxygenase, calponin and LIM domain containing 1		84.0384	87.6317	85.6071	161.894	125.127	62.6768	36.9763	23.6717	27.6523	15.2269	25.5673	30.0604	121.871	251.087	234.412	202.665	286.709	296.166		125.613	74.1351	63.7265	79.1001	88.2537	103.963	0.947906
ENSG00000130935	25926	NOL11	nucleolar protein 11		80.3372	69.1386	81.2585	52.9455	48.549	19.4283	19.3869	27.4	18.1048	17.0321	17.8597	17.7369	96.1693	68.8738	71.3618	63.372	62.9799	57.6333		32.7419	32.531	21.5631	26.683	29.1638	22.4316	0.947876
ENSG00000177599	126069	ZNF491	zinc finger protein 491		6.95772	10.064	8.81164	6.31041	3.94724	1.86069	1.91617	0.919039	1.05727	0.864484	1.32556	1.39575	6.9413	11.7705	12.2652	11.536	9.67106	9.56492		3.59121	1.66782	1.15776	1.75092	1.44276	1.51166	0.947846
ENSG00000126970	55906	ZC4H2	zinc finger C4H2-type containing		57.43	46.1628	53.654	46.5512	41.1862	37.063	21.703	24.0997	15.2129	21.1113	18.3695	19.8575	56.8424	74.3821	53.1606	53.3034	44.7314	46.9928		28.8948	16.58	21.5803	18.9382	21.2653	19.5231	0.947789
ENSG00000112039	2178	FANCE	FA complementation group E		25.6302	22.5206	22.0041	20.8182	15.0259	13.4607	3.51694	1.98247	3.46716	2.46068	2.46226	2.85855	22.9473	19.357	24.7795	19.9574	19.2709	17.3944		10.3415	2.36468	3.2391	3.81393	2.50326	2.9119	0.94775
ENSG00000126226	55795	PCID2	PCI domain containing 2		40.5543	30.7899	30.5875	35.2277	31.8911	25.5636	21.3338	18.8492	14.5589	17.9342	19.8286	24.3204	58.1004	55.3004	51.8538	42.6974	51.6051	50.3236		36.178	36.1682	28.8381	32.1012	32.8968	33.8144	0.947714
ENSG00000160961	84449	ZNF333	zinc finger protein 333		15.8423	21.1503	18.3274	22.8917	19.3803	9.53814	7.54612	5.22386	5.99456	7.26501	7.42961	9.00393	34.9653	40.6844	46.8449	44.1576	63.1919	58.0878		30.0689	17.0695	10.1859	15.0539	15.038	17.5657	0.947664
ENSG00000101335	10398	MYL9	myosin light chain 9		2.1818	1.40859	0.793108	0.962687	1.40814	41.8907	19.7499	15.6565	31.0736	12.4112	19.5162	16.1429	12.5286	5.05924	7.8695	4.47267	2.8031	2.90245		20.0766	25.7794	59.4809	27.3631	30.8246	32.4249	0.947645
ENSG00000105402	8775	NAPA	NSF attachment protein alpha		89.5211	111.043	118.59	110.025	101.734	153.901	158.525	250.397	264.348	209.252	295.373	291.774	55.477	90.1884	96.8118	108.783	101.566	87.4419		111.863	202.286	302.18	268.68	291.943	314.338	0.947424
ENSG00000133874	79845	RNF122	ring finger protein 122		48.1648	40.8561	38.4554	27.4494	16.6227	17.3832	5.64991	1.64106	3.21902	2.60788	1.57875	1.38102	31.5077	34.0975	34.3072	22.2744	14.7036	17.9468		12.5348	2.66005	2.49616	1.81645	2.10626	1.4307	0.947411
ENSG00000254726	92312	MEX3A	mex-3 RNA binding family member A		353.548	458.703	415.645	321.445	276.613	108.775	14.6694	3.34383	3.92888	2.99251	2.22467	1.46018	280.852	300.397	364.226	373.61	414.139	348.126		124.429	8.17838	3.55628	2.98473	2.68322	2.08929	0.947382
ENSG00000119922	3433	IFIT2	interferon induced protein with tetratricopeptide repeats 2		0.77691	1.15987	0	1.11302	1.64283	6.72196	10.0956	7.96039	16.3751	17.8059	13.5265	14.8005	0	0.518632	1.04642	1.417	0.561546	2.27367		14.1498	7.9006	10.9156	19.5369	13.4416	14.4912	0.947183
ENSG00000164080	23132	RAD54L2	RAD54 like 2		66.3644	96.5553	75.0479	73.3461	55.3111	19.6295	26.1883	19.3834	16.9836	14.0458	27.3263	26.9367	111.886	83.7825	84.6957	80.6239	80.3777	72.5901		38.4254	30.3643	23.0596	31.2377	23.2091	30.0989	0.947126
ENSG00000184489	11156	PTP4A3	protein tyrosine phosphatase 4A3		28.6893	39.7784	34.3686	41.26	34.6327	56.0387	33.03	18.2224	20.4307	15.3256	21.2269	18.402	17.2663	29.8957	39.3424	31.988	42.0656	30.5927		30.6357	19.4639	26.5285	16.2388	17.7816	21.6242	0.947079
ENSG00000142208	207	AKT1	AKT serine/threonine kinase 1		235.202	208.483	230.667	271.534	209.83	147.498	113.999	102.242	78.9362	85.2453	90.2789	72.2743	190.717	247.457	248.569	246.604	253.835	236.932		192.305	118.195	128.998	109.419	101.837	113.275	0.947005
ENSG00000171792	83695	RHNO1	RAD9-HUS1-RAD1 interacting nuclear orphan 1		60.2657	44.3125	44.2166	34.5432	30.1028	24.6584	19.7331	10.4317	11.602	13.877	16.294	13.6456	76.2409	63.9541	63.9429	62.643	58.5574	47.1076		33.1736	21.4671	23.5658	22.337	21.9096	21.6651	0.946989
ENSG00000107938	26098	EDRF1	erythroid differentiation regulatory factor 1		27.975	32.7128	29.726	25.5461	24.8647	11.1809	14.6695	18.5869	11.9357	9.95501	11.0399	14.1133	51.6956	43.0996	43.4235	41.4356	41.0799	42.3854		28.779	30.6979	17.3171	24.1644	23.3475	24.0151	0.946986
ENSG00000178297	360200	TMPRSS9	transmembrane serine protease 9		0	0	0	0.545127	0.521704	3.40289	3.77346	1.68583	3.70824	2.62466	1.28628	0.541702	1.30622	0	0	0	0	0.88065		3.38102	1.70205	2.26295	1.81363	0.754193	0	0.94692
ENSG00000197451	3182	HNRNPAB	heterogeneous nuclear ribonucleoprotein A/B		342.956	221.89	301.009	249.616	205.204	55.5023	67.0979	61.4478	45.6019	34.7895	47.9553	41.3182	283.522	265.722	241.735	196.2	179.857	188.406		104.201	86.7005	68.8222	73.275	65.8184	52.3818	0.946755
ENSG00000160199	5316	PKNOX1	PBX/knotted 1 homeobox 1		55.9009	55.8004	57.1101	49.5023	44.3792	23.5855	20.7916	22.1784	12.8759	15.6926	17.922	14.9197	29.5082	49.9002	47.9437	55.67	60.0358	53.2701		29.9674	30.941	21.1277	22.7101	22.2368	20.3887	0.946669
ENSG00000189298	80317	ZKSCAN3	zinc finger with KRAB and SCAN domains 3		10.3546	14.4393	11.8407	11.0085	9.62511	7.12427	5.7108	4.23197	3.64296	2.63393	4.86226	3.80808	19.8848	14.7848	16.8434	14.3761	16.1121	15.4659		9.00485	4.98309	4.22906	6.61681	5.29859	5.20839	0.946655
ENSG00000097046	8317	CDC7	cell division cycle 7		48.8167	33.5957	29.658	21.008	20.0811	12.4214	14.5088	18.5633	8.64044	14.043	11.2402	11.8647	79.036	60.2474	50.0847	40.1318	38.9332	32.6425		23.2486	21.9544	19.4977	13.7296	16.1862	18.6659	0.946605
ENSG00000158321	26053	AUTS2	activator of transcription and developmental regulator AUTS2		261.327	991.717	760.014	450.758	433.885	73.9751	72.9004	40.5995	45.9544	33.8853	59.8543	41.0467	262.364	464.533	739.755	607.803	522.559	422.075		123.523	66.4324	49.216	40.6648	38.8662	44.5131	0.9466
ENSG00000248719	---	---	---		0.426086	1.35355	1.24308	0.813501	0.618855	0	0	0	0	0	0	0	0	0.403092	2.28738	1.77235	1.88607	0.809352		0.563489	0	0	0	0	0	0.946541
ENSG00000159200	1827	RCAN1	regulator of calcineurin 1		89.6251	493.526	502.049	192.495	172.146	77.1265	68.9421	59.5112	76.9532	72.1095	83.7211	84.7201	20.0181	58.9005	215.18	203.392	112.717	113.778		112.433	88.832	93.9018	105.041	90.1101	77.0501	0.946481
ENSG00000251247	25850	ZNF345	zinc finger protein 345		9.07874	9.29833	8.49122	6.86174	5.90959	4.94508	2.98678	1.37556	2.92612	1.97615	1.81009	2.00703	15.8717	13.0175	12.3347	10.1992	10.3455	11.0182		4.36851	3.13344	1.75077	4.44643	3.01472	2.98277	0.946416
ENSG00000228412	100506885	LOC100506885	uncharacterized LOC100506885		1.30727	0	0	0	0	0	0	0	0	0	0	0	0.942404	1.25481	0.416103	0	0	0		0	0	0	0	0	0	0.946409
ENSG00000160695	55823	VPS11	VPS11 core subunit of CORVET and HOPS complexes		49.3044	58.778	64.4161	56.7809	53.4768	72.8352	59.2274	67.1533	63.6265	66.1966	80.8725	91.0332	39.253	44.4567	55.0176	56.693	55.7192	52.4226		52.7906	54.3506	65.1132	58.0356	75.8009	89.8762	0.946349
ENSG00000130592	4046	LSP1	lymphocyte specific protein 1		0	0	0	0	0.504015	7.25838	1.56451	2.10696	3.68358	3.32996	3.21887	2.02011	0.722578	0	0	0	0	0		1.37692	2.9529	3.06851	2.52142	3.6675	2.42763	0.945985
ENSG00000132155	5894	RAF1	Raf-1 proto-oncogene, serine/threonine kinase		218.74	186.047	184.396	195.994	174.445	127.248	84.05	61.756	51.1564	53.6398	70.3356	69.5371	195.558	209.014	224.973	214.302	224.537	213.628		159.261	106.753	75.1754	78.5354	76.9047	81.1509	0.945918
ENSG00000114812	7433	VIPR1	vasoactive intestinal peptide receptor 1		0.454212	0.406216	0	0	0	1.29075	14.5165	33.2877	31.8576	31.9287	43.7704	45.913	1.02106	0.91914	0.942377	0.792395	0	0		2.81539	38.8469	48.3446	24.478	41.6031	48.9499	0.945871
ENSG00000196387	7699	ZNF140	zinc finger protein 140		25.6134	30.7806	27.9785	25.2295	19.2283	9.06878	11.6542	11.3348	11.7728	9.28046	9.93096	8.10486	27.3247	28.9377	29.9811	29.891	28.8952	28.9923		13.718	17.1081	12.1924	12.5345	13.697	12.4026	0.94587
ENSG00000215424	114044	MCM3AP-AS1	MCM3AP antisense RNA 1		3.12935	4.1948	4.41598	4.00033	4.29868	1.45838	1.46739	0.757895	0.558335	1.20903	0.809603	1.60065	6.68455	6.36524	8.03167	9.06665	12.4434	9.45344		2.91427	1.47648	0.410292	1.06707	0.558206	0.942398	0.945756
ENSG00000140470	170691	ADAMTS17	ADAM metallopeptidase with thrombospondin type 1 motif 17		0	0.94787	2.02125	2.49174	3.5224	11.3485	10.8697	2.78832	4.38643	3.29575	3.29255	2.66998	2.31677	1.27361	1.37062	2.56909	2.39841	3.86136		17.741	7.3691	5.09115	4.91394	3.60474	4.83572	0.945724
ENSG00000110583	79829	NAA40	N(alpha)-acetyltransferase 40, NatD catalytic subunit		56.9048	49.8945	41.6807	65.2415	51.5418	25.7982	22.0081	14.2967	13.8353	17.2974	18.414	19.9918	94.1522	86.5002	77.0749	79.3802	78.1647	83.4113		47.4274	23.6046	25.7103	25.964	25.1338	30.0115	0.94563
ENSG00000174326	162515	SLC16A11	solute carrier family 16 member 11		0	0	0	0	0	4.37514	1.88506	1.56814	3.28348	1.66234	2.64027	1.83243	0	0	0	0	0	0		1.32357	0.80432	2.59818	1.73912	1.3974	1.82346	0.945593
ENSG00000182095	84629	TNRC18	trinucleotide repeat containing 18		195.767	316.212	218.68	337.503	266.071	240.8	173.064	95.0949	69.5607	53.0543	114.263	84.2202	252.59	281.957	300.1	244.95	352.912	248.982		190.768	89.9644	88.334	47.1283	50.894	61.8843	0.945579
ENSG00000139880	64403	CDH24	cadherin 24		65.1669	64.4601	44.6691	49.1751	30.2916	36.0237	28.2341	20.1949	23.4766	22.5289	18.0111	19.3382	80.874	121.585	116.572	75.9121	53.691	66.8448		35.023	20.1838	15.5112	13.3583	18.0385	13.5475	0.945545
ENSG00000169499	59339	PLEKHA2	pleckstrin homology domain containing A2		4.95414	6.09447	5.26623	4.50786	5.57048	17.9867	10.7132	11.1685	15.3647	21.1235	29.4258	39.4419	4.97656	3.71796	6.22868	7.25702	3.99628	9.63897		14.6759	19.0829	14.4584	19.8231	22.6874	39.0036	0.945543
ENSG00000128534	51691	LSM8	LSM8 homolog, U6 small nuclear RNA associated		20.0432	14.5667	14.33	12.6663	13.5434	7.49306	7.4	6.80481	8.65289	7.14312	5.74137	5.61606	41.9815	32.5856	25.0888	20.4114	18.4298	22.7133		13.2895	12.2534	12.134	16.5132	13.92	9.13467	0.94553
ENSG00000198909	4215	MAP3K3	mitogen-activated protein kinase kinase kinase 3		26.7995	38.9479	30.6112	41.1122	33.9825	33.4422	19.3252	14.4048	14.2248	13.9972	18.1154	21.0951	35.2385	38.0785	47.0495	43.7607	54.3128	44.6035		37.6182	29.0809	29.8139	31.2627	28.9407	29.5846	0.945401
ENSG00000261325	100507534	LINC02192	long intergenic non-protein coding RNA 2192		0	0	0	0	0	0	0	0.554994	0.753785	1.48649	2.50239	2.40092	0	0	0	0	0	0		0	0	2.04578	1.80222	3.89307	2.76716	0.945377
ENSG00000160293	7410	VAV2	vav guanine nucleotide exchange factor 2		81.0713	88.6737	82.6755	113.143	109.541	73.6734	37.5116	22.1213	9.9183	11.9761	15.9676	16.5845	71.9191	72.4057	92.7982	100.153	130.568	115.909		84.4447	16.8883	10.9156	6.29265	12.6492	15.9954	0.945365
ENSG00000161249	93099	DMKN	dermokine		0	0	0	0	0	0	0	0.439667	1.17339	2.2456	1.79018	3.69332	3.67467	0.489139	0	0.515504	0	0		0	1.35964	1.3874	2.65063	4.0091	9.14218	0.945338
ENSG00000072163	55679	LIMS2	LIM zinc finger domain containing 2		4.28517	6.71902	7.00327	10.3476	15.4342	102.07	102.277	44.5391	111.444	34.5836	43.6276	26.7058	2.63852	5.49725	6.3174	5.971	10.243	11.9687		54.2987	35.4315	47.1533	31.7961	24.0323	21.906	0.945321
ENSG00000001617	6405	SEMA3F	semaphorin 3F		33.0669	69.5433	59.7245	53.2307	41.8474	48.0595	12.1765	4.87175	7.9983	5.20446	5.16951	6.20555	38.3754	53.6175	61.9062	60.6974	65.1252	39.5947		26.1804	7.13878	5.41694	3.44543	3.48894	5.09316	0.945307
ENSG00000166669	80063	ATF7IP2	activating transcription factor 7 interacting protein 2		2.50339	1.67937	2.26316	2.95218	3.57184	2.56474	5.73366	10.8275	8.66189	8.27051	8.29009	7.233	12.1217	9.0933	4.18342	5.07117	5.36697	6.90782		10.0729	24.116	15.3782	13.0135	16.1828	15.3235	0.945297
ENSG00000173227	91683	SYT12	synaptotagmin 12		0	0.829365	0.6782	1.83459	1.92784	4.97861	15.3167	35.5538	33.6869	26.4477	58.7288	69.2674	0.961938	2.73565	1.10135	2.84537	0.795217	1.24838		5.79284	39.2423	73.4821	59.8978	79.1745	98.5225	0.945292
ENSG00000060339	55749	CCAR1	cell division cycle and apoptosis regulator 1		78.7369	57.6508	56.9363	53.3937	56.9344	22.5462	33.0962	32.3567	29.9222	21.1676	28.1562	29.2408	225.081	156.496	132.313	109.703	105.141	106.764		83.1429	78.547	52.28	69.0624	73.352	60.037	0.945098
ENSG00000256008	---	---	---		0	0	0	0	0	0.519653	0.800516	2.8965	1.90634	2.37408	3.43197	4.39292	0	0	0.640339	0	0	0		0.68235	2.37584	4.04398	2.78293	4.91909	6.7403	0.945068
ENSG00000124571	57510	XPO5	exportin 5		109.37	121.35	115.426	81.4732	79.2225	55.6699	35.527	46.7112	26.3009	29.4578	34.8499	36.9297	169.125	94.6691	108.566	102.128	102.275	80.2576		55.6857	38.3053	29.8004	27.5396	29.8944	34.7893	0.945061
ENSG00000157212	22976	PAXIP1	PAX interacting protein 1		22.0885	17.347	16.4433	16.36	13.6396	6.01791	6.45685	4.87807	3.8908	4.37584	5.4366	6.56692	46.4029	33.1926	37.248	29.8526	26.7915	24.7139		18.7063	13.8492	8.79554	11.34	13.2078	11.0051	0.945025
ENSG00000196653	91392	ZNF502	zinc finger protein 502		13.5409	15.3144	15.95	13.0818	11.0339	8.29768	5.82662	3.53956	4.50496	3.25426	4.54034	3.51632	16.251	19.4632	18.5445	18.3202	20.1168	17.8005		10.7943	8.64065	4.8691	4.92262	5.21698	5.12409	0.94497
ENSG00000101452	60625	DHX35	DEAH-box helicase 35		27.4947	21.7042	22.7826	20.8657	15.9646	9.16936	10.7731	9.83991	7.76528	9.22821	12.7441	13.3035	42.1239	29.1615	29.3904	23.1868	23.8794	21.9134		12.0072	10.1226	10.2334	13.0697	12.3321	15.9761	0.944876
ENSG00000143033	22823	MTF2	metal response element binding transcription factor 2		57.0799	58.853	45.5098	37.9644	37.3507	17.7185	15.6788	17.9358	12.2341	11.1221	14.8278	13.3713	124.46	113.745	83.2886	63.9066	75.7156	72.7401		38.1759	30.4619	19.9875	27.0329	28.9166	24.6574	0.944825
ENSG00000130396	4301	AFDN	afadin, adherens junction formation factor		319.591	738.338	564.582	301.303	297.286	91.5092	84.6645	63.4825	49.9656	48.8154	62.3255	65.8659	456.982	525.147	919.476	463.2	466.03	439.915		195.502	117.256	67.9148	75.1632	78.4866	86.0324	0.94471
ENSG00000118705	6185	RPN2	ribophorin II		190.686	173.135	166.336	150.185	121.272	114.776	120.084	93.3021	74.5541	68.1116	80.1336	74.4834	261.662	192.34	207.116	198.085	151.381	145.213		148.58	141.046	113.621	95.5849	95.5134	89.7853	0.944692
ENSG00000164048	51385	ZNF589	zinc finger protein 589		37.3612	40.3801	38.104	44.4658	41.9883	19.1266	12.5078	16.5887	11.0364	8.82652	11.2712	13.222	62.5835	51.1959	63.2669	47.1397	53.3838	54.6422		29.2497	20.5969	20.7546	26.9478	21.5106	18.6753	0.944621
ENSG00000230510	100506012	PPP5D1	PPP5 tetratricopeptide repeat domain containing 1		0.782245	0.698409	1.3381	1.75144	1.26823	2.66532	3.26421	2.83258	2.22713	2.08197	2.40496	1.89786	0.433436	1.34895	1.25219	1.64963	2.15257	1.61343		4.76918	3.71714	3.27808	2.8462	3.54905	3.73211	0.944552
ENSG00000188070	65998	C11orf95	chromosome 11 open reading frame 95		242.849	405.777	332.979	353.406	322.266	151.99	80.0286	87.0199	34.5277	49.6265	61.8015	45.7428	133.1	271.216	308.595	283.697	411.935	312.097		135.809	50.766	77.8376	24.292	36.4482	44.919	0.944506
ENSG00000074317	6620	SNCB	synuclein beta		47.7538	36.709	37.4565	83.707	101.443	418.388	300.477	473.724	515.361	403.841	604.972	485.039	0	21.0888	34.548	45.6235	65.0432	26.9489		175.748	324.532	604.698	366.114	531.128	588.019	0.944454
ENSG00000125037	55831	EMC3	ER membrane protein complex subunit 3		29.5963	32.9446	43.3801	34.7152	35.2879	57.4133	57.5273	87.116	85.359	82.4343	66.771	71.943	22.8734	25.5445	28.2569	35.4547	30.7474	30.2596		47.8193	85.7021	95.6849	87.3463	96.1622	86.3462	0.944231
ENSG00000174206	144577	C12orf66	chromosome 12 open reading frame 66		3.02562	3.22556	3.40067	2.66679	2.6715	3.63757	4.24279	6.4529	4.07572	7.75611	6.49647	7.43857	3.80941	2.2651	2.59661	3.02122	3.84606	3.42543		4.32438	6.70108	6.03109	8.88704	7.87072	9.01481	0.944218
ENSG00000108771	79132	DHX58	DExH-box helicase 58		0	0.53467	0	0.67924	0.873658	11.4156	8.63095	9.60661	11.5811	10.8596	10.0156	8.13843	0	0.643868	0.802906	1.06969	0.807283	1.17516		8.79457	12.1144	11.8677	10.3577	11.1037	14.51	0.94418
ENSG00000130544	79230	ZNF557	zinc finger protein 557		3.89371	9.97313	8.47424	11.9144	7.40927	3.13468	3.15522	2.74451	2.82963	1.80351	2.54193	3.31154	9.84348	7.82299	10.6987	12.7203	18.7063	13.188		5.58593	3.48893	2.81062	2.54727	2.60961	3.50214	0.944101
ENSG00000261416	---	---	---		0	0	0	0	0	0.620231	0.797099	0.655296	1.43083	0.568119	0.623023	0.490509	0	0	0	0	0	0		0.868028	1.78056	3.73294	1.77261	1.85867	1.49841	0.944089
ENSG00000204136	2681	GGTA1P	glycoprotein alpha-galactosyltransferase 1, pseudogene		0.864248	1.93668	2.12583	1.45205	1.83915	4.10693	7.27324	6.33484	14.7912	8.54962	7.78248	5.47814	0	0	0.84481	0.966214	0.713164	0.994559		7.35905	9.69827	14.7737	11.3506	9.67038	9.46811	0.943751
ENSG00000178409	57673	BEND3	BEN domain containing 3		21.9852	26.3182	19.0855	27.4354	17.9267	3.87225	3.78956	1.55609	2.39946	3.07589	2.64371	2.61578	48.2619	27.2944	22.9719	26.4908	37.4927	28.833		10.3601	5.65195	2.57328	2.29948	2.07775	2.46266	0.943739
ENSG00000142039	90324	CCDC97	coiled-coil domain containing 97		30.4557	43.0377	40.0525	48.5499	41.3251	37.5659	25.3369	20.5177	22.6881	19.4242	22.6707	20.327	49.7186	43.5972	48.9653	53.1431	51.0155	48.0251		29.4774	21.579	20.793	22.9735	19.1785	21.6378	0.943665
ENSG00000170222	56985	ADPRM	ADP-ribose/CDP-alcohol diphosphatase, manganese dependent		9.37824	11.9931	13.341	10.6453	8.78665	7.25838	4.8451	3.90892	4.26576	5.18366	4.06478	3.87878	9.02938	8.94057	12.5145	10.384	11.3831	10.0033		6.27961	4.95854	4.38179	5.90487	5.3519	5.42957	0.94366
ENSG00000178038	259173	ALS2CL	ALS2 C-terminal like		0	1.02879	0.662022	2.49746	3.10227	5.54855	2.83293	1.87161	4.20589	2.81471	4.87699	8.43225	2.14104	3.08344	2.72455	4.51583	9.52416	9.31391		10.5816	8.18729	8.97669	11.7935	14.8261	33.798	0.943433
ENSG00000150054	143098	MPP7	membrane palmitoylated protein 7		6.39408	3.18898	2.02632	1.31992	0.719199	1.49191	2.62051	8.93479	4.65691	10.8068	13.2622	16.671	10.314	7.16567	4.1442	4.68452	0.817815	1.75543		3.23203	8.07095	7.72838	8.19315	10.8189	17.2392	0.943419
ENSG00000166261	7753	ZNF202	zinc finger protein 202		19.1327	24.1735	27.2133	27.971	26.2976	14.4329	9.41862	10.1102	9.02179	8.04122	7.70609	10.3173	42.4683	39.4035	36.9942	38.0775	45.7184	39.9873		24.7448	22.163	15.8146	15.9191	16.8953	15.6069	0.943409
ENSG00000122359	311	ANXA11	annexin A11		12.6703	5.72782	4.1772	6.52983	4.95739	33.8445	33.8309	87.1251	109.159	120.159	109.943	146.968	12.7752	5.27163	11.5323	7.98821	3.4362	9.10983		23.1538	65.9893	146.708	78.9644	114.946	154.32	0.943402
ENSG00000095319	23511	NUP188	nucleoporin 188		102.45	89.4165	77.5638	75.8465	53.1477	32.0341	29.4533	15.9892	19.8501	17.5368	25.2717	27.8241	149.504	84.598	99.9171	85.1102	65.8911	71.0585		37.2661	31.4993	22.7283	29.9452	24.6755	28.8886	0.9433
ENSG00000244242	402778	IFITM10	interferon induced transmembrane protein 10		0.962339	1.86498	2.00845	2.27826	3.38856	23.0491	19.5227	12.5423	23.6075	15.4835	24.7951	21.8739	0.530895	2.29283	2.08753	3.7483	1.73675	1.48846		12.8939	14.6761	21.9913	22.0891	23.9473	24.5584	0.943247
ENSG00000145908	91975	ZNF300	zinc finger protein 300		58.4778	90.8127	89.3405	73.1988	60.2714	13.4607	11.7061	5.14431	3.71265	3.8945	1.8875	1.64629	83.9914	126.234	128.428	113.662	138.357	138.185		38.6274	13.679	5.04866	7.10918	4.48348	2.81874	0.943214
ENSG00000082482	3776	KCNK2	potassium two pore domain channel subfamily K member 2		9.63586	37.8404	48.0171	66.7768	73.137	19.2272	24.9967	21.4976	8.04613	15.5345	12.5214	14.5347	14.0642	13.4983	16.083	48.6265	92.4028	90.8291		27.1561	16.3507	10.8487	7.77217	15.2784	12.5579	0.943084
ENSG00000215492	---	---	---		0.840679	0.894865	1.05631	0.434728	0.582022	0	0	0	0	0	0	0	7.76246	4.88636	6.51391	5.20128	4.03446	4.07385		2.56168	1.20796	1.10416	0.853129	0.993625	1.05326	0.942974
ENSG00000076864	5909	RAP1GAP	RAP1 GTPase activating protein		32.0891	53.4327	56.7826	77.4018	89.2195	237.045	180.777	223.499	200.286	197.411	269.617	321.163	17.0601	43.5225	54.8024	72.3958	146.253	84.4959		189.874	439.302	347.651	256.917	379.017	438.366	0.942971
ENSG00000134744	23318	TUT4	terminal uridylyl transferase 4		67.2616	80.18	70.7429	58.1677	64.1474	23.0491	25.9173	20.3354	11.8541	11.8334	18.6098	18.395	199.473	134.695	119.12	106.802	124.302	122.185		76.3093	46.7073	22.5288	33.8291	29.4214	36.1169	0.942913
ENSG00000154175	25890	ABI3BP	ABI family member 3 binding protein		1.22556	4.26656	1.636	6.31721	4.94182	24.6248	16.3211	6.22963	3.34882	3.61326	2.87611	3.57928	0	0	2.60014	2.07759	4.24462	4.00917		29.9997	3.43369	5.98479	2.98313	3.34853	3.59411	0.942907
ENSG00000197766	1675	CFD	complement factor D		0	0	0	0.540139	0.708654	9.80635	3.83229	3.28859	5.2945	1.75396	1.37128	1.76336	0	0	0	0	0	0		1.42986	1.21882	2.10716	0.799822	0.807801	0	0.942841
ENSG00000111801	10384	BTN3A3	butyrophilin subfamily 3 member A3		0.696535	0	0	0.534904	0.416183	7.49306	5.46834	5.43983	7.5711	7.24229	7.13807	8.37679	3.98448	3.03623	2.93211	1.76053	0	2.57997		8.11682	8.31627	7.61174	9.17477	8.55224	12.5853	0.94284
ENSG00000198719	28514	DLL1	delta like canonical Notch ligand 1		75.8053	24.1458	21.5077	25.2259	14.4612	10.7786	7.48125	3.4208	6.26001	3.05395	6.01013	5.87591	111.463	102.523	56.7458	30.5746	22.4817	32.5073		25.8145	8.40258	7.28187	11.6186	9.15682	8.67711	0.942784
ENSG00000142168	6647	SOD1	superoxide dismutase 1		183.098	91.3445	143.289	146.435	136.927	197.686	244.426	332.298	338.211	404.081	346.695	332.208	94.0784	119.385	109.795	116.437	96.265	126.43		210.681	409.945	410.158	427.071	514.762	467.281	0.942682
ENSG00000116741	5997	RGS2	regulator of G protein signaling 2		11.6389	21.7702	27.2455	17.6348	18.4853	26.737	32.1633	63.735	30.5429	28.2536	27.8261	24.4083	20.4186	24.6997	18.6372	28.0775	20.3212	16.8288		47.5738	127.085	60.305	33.8905	51.8437	46.0689	0.942641
ENSG00000144285	6323	SCN1A	sodium voltage-gated channel alpha subunit 1		0.961885	5.24373	3.88229	4.78185	5.37209	19.9983	24.5072	46.8036	19.2295	46.4279	77.1824	107.21	6.00861	19.0407	12.4439	17.5986	27.9916	18.5895		44.9236	35.1034	41.8116	52.707	63.943	107.899	0.942611
ENSG00000139278	11010	GLIPR1	GLI pathogenesis related 1		1.40264	1.61241	1.20781	0.95319	1.19172	3.13468	4.17615	5.53778	4.49166	8.92345	7.3896	12.8154	0.985124	1.27159	1.18111	4.21943	0.797719	1.19303		6.43205	12.7444	9.0798	11.7562	17.6629	21.8514	0.942583
ENSG00000251369	162972	ZNF550	zinc finger protein 550		8.20969	12.0317	10.7389	10.7938	10.5515	6.2526	3.85839	3.85323	3.26736	3.34336	3.80876	4.58894	26.2387	16.9293	19.7327	21.6699	22.7081	19.6475		13.4032	7.75046	5.37171	6.33148	6.93174	7.81818	0.942536
ENSG00000133640	84125	LRRIQ1	leucine rich repeats and IQ motif containing 1		2.58277	1.90002	1.40067	0.799496	1.03264	0.419075	0.75998	1.22244	0.507354	0.864897	0.89942	0.566278	13.6108	7.04328	3.96409	4.18655	3.10446	2.34689		1.94828	2.66896	1.27046	1.7105	1.86526	1.41434	0.942513
ENSG00000103653	1445	CSK	C-terminal Src kinase		67.5008	120.972	117.011	148.143	122.377	101.735	53.4114	39.7208	51.1135	28.435	40.7729	33.676	64.2763	79.6906	85.5831	92.3543	112.242	82.7455		57.593	42.2025	38.7435	36.6973	32.1848	29.1934	0.942438
ENSG00000120071	284058	KANSL1	KAT8 regulatory NSL complex subunit 1		81.9538	124.268	109.035	102.842	87.6641	65.0907	38.2678	30.6084	21.7308	24.4272	40.6404	44.6509	168.524	125.807	139.643	140.586	151.636	140.483		79.6419	48.2378	38.3521	36.151	37.8188	51.0345	0.942426
ENSG00000069943	9488	PIGB	phosphatidylinositol glycan anchor biosynthesis class B		2.2903	1.5816	1.69561	1.5796	2.00156	2.69884	3.1699	4.23989	2.67777	5.17611	3.52939	4.29862	7.2264	6.48964	3.97456	6.19823	4.51601	6.04507		6.87264	9.46753	7.58602	11.8118	10.3758	9.95956	0.942424
ENSG00000213563	414919	C8orf82	chromosome 8 open reading frame 82		51.0193	49.767	51.2497	61.5063	49.8613	48.093	26.2128	12.7378	30.6976	11.2436	20.6791	14.4847	17.7056	32.2966	30.3926	24.7003	34.307	29.3766		16.7287	12.5574	12.2688	12.4872	11.9962	11.3493	0.942406
ENSG00000164002	64789	EXO5	exonuclease 5		6.99384	11.7265	11.4769	10.6821	9.79777	3.46994	2.39475	4.14637	3.15099	3.29604	2.76273	3.19669	11.3173	12.5536	14.725	16.3255	17.7006	15.9966		8.54045	5.52721	5.62962	6.50176	6.23501	6.59549	0.942383
ENSG00000163273	4880	NPPC	natriuretic peptide C		0	0	0	0	0	2.69884	1.81926	3.55898	2.64206	3.69827	3.70621	1.88976	0	0.456617	0	0.51021	0	0		1.17163	2.67519	3.03916	3.07924	2.2873	1.9079	0.942363
ENSG00000103429	51283	BFAR	bifunctional apoptosis regulator		59.2899	55.3246	68.2777	45.1165	41.5905	42.4942	36.8631	29.3973	22.1766	24.8526	25.5434	25.4503	65.4652	43.1044	52.5767	56.4515	43.4395	40.7329		41.6141	31.0798	25.841	23.3317	26.2155	26.424	0.942281
ENSG00000120008	55717	WDR11	WD repeat domain 11		45.0217	47.3663	46.0513	43.6987	52.5228	33.6098	36.3326	31.3934	20.1241	28.88	31.1502	39.9989	101.213	88.1975	75.4998	78.073	77.4818	97.7209		69.281	53.8598	40.0626	47.506	54.7799	59.6369	0.942247
ENSG00000124784	83732	RIOK1	RIO kinase 1		30.8314	38.8892	46.894	30.0188	34.9892	16.9139	21.7262	21.2276	14.533	11.8553	14.8248	14.3126	33.8328	32.3123	37.9368	37.6336	36.1666	35.2046		28.3299	24.0445	21.7087	18.0249	23.4474	18.5937	0.942199
ENSG00000033030	55596	ZCCHC8	zinc finger CCHC-type containing 8		30.7613	25.5922	26.1949	25.4149	26.2299	13.7624	10.0671	7.39624	7.48895	6.88176	6.95561	7.45909	49.6603	54.7647	46.1683	39.9295	47.8024	47.3529		35.1847	24.2148	14.6619	17.6541	20.2631	15.8748	0.942163
ENSG00000242852	163051	ZNF709	zinc finger protein 709		1.21924	1.02954	0.840495	0.734247	1.07713	0.452601	0	0	0	0	0	0	1.36068	2.52052	1.97525	1.54852	1.93025	1.85469		0.908903	0.535296	0	0	0	0	0.942144
ENSG00000084628	79570	NKAIN1	sodium/potassium transporting ATPase interacting 1		145.191	247.004	230.181	228.954	184.122	102.472	24.8806	24.1383	12.5383	19.5939	14.5388	12.5251	101.314	138.18	189.518	201.886	297.137	152.044		68.6994	14.1417	14.7586	12.2583	18.1882	13.0706	0.942032
ENSG00000211451	114814	GNRHR2	gonadotropin releasing hormone receptor 2 (pseudogene)		1.16393	0.691539	0.985938	2.00287	1.54444	1.12312	1.25768	1.36267	1.24376	2.1599	2.67839	4.88619	1.00701	1.20698	1.21708	1.54867	2.38723	1.61819		1.92458	2.50984	2.23977	2.99801	4.40173	5.62865	0.941873
ENSG00000090061	8812	CCNK	cyclin K		48.3071	41.5503	38.6215	33.4899	29.8346	32.2688	22.3018	19.0731	22.6461	20.119	21.7164	20.7734	71.4063	58.8726	57.0349	47.6225	46.2969	41.3911		40.9252	32.0628	27.9084	29.4164	28.8562	27.4462	0.941736
ENSG00000205744	79958	DENND1C	DENN domain containing 1C		0	0	0	0.539517	0.424579	4.87803	1.64722	2.64308	3.55895	2.73408	2.50417	2.13132	0.514155	0.673747	0.639083	0.610411	0	0.683688		2.85969	4.76587	4.18346	3.83213	4.07559	2.62832	0.941659
ENSG00000104856	5971	RELB	RELB proto-oncogene, NF-kB subunit		1.50585	1.15818	1.2135	1.39936	1.53133	4.00636	9.41117	8.46909	7.23452	4.97475	5.6509	4.28221	0.825919	1.37032	1.05219	1.1988	1.17603	1.64609		7.07045	8.83655	7.61104	7.05651	4.80719	3.59673	0.941588
ENSG00000171517	23566	LPAR3	lysophosphatidic acid receptor 3		0	0	0	0	0	0	0	0	0	0.409615	1.20833	1.85705	0.453274	0	0	0	0	0		0	0	0	0	0.972264	3.07625	0.941535
ENSG00000067113	8611	PLPP1	phospholipid phosphatase 1		5.80682	5.71499	6.99451	8.70489	9.5464	24.5243	19.5327	16.5779	22.0208	27.9766	24.4941	28.4918	9.06146	10.0849	9.46564	11.2601	13.1041	12.5818		26.1333	35.3463	50.588	70.3926	53.525	47.4947	0.941448
ENSG00000149925	226	ALDOA	aldolase, fructose-bisphosphate A		516.7	298.769	363.209	391.562	333.791	2122.11	1141.35	2129.02	1678.15	1977.71	1897.62	1997.01	351.59	302.684	309.088	287.056	255.018	239.94		552.959	1441.59	1706.01	1276.8	1668.91	1865.25	0.941384
ENSG00000009950	51085	MLXIPL	MLX interacting protein like		0	0	0	0.664557	0.40733	1.92774	4.24256	6.00593	8.52542	6.85624	14.3925	16.2523	0.6524	0.501967	0	0.435746	0	0		3.13381	22.7842	23.0448	26.2985	29.5036	38.0511	0.941301
ENSG00000105323	11100	HNRNPUL1	heterogeneous nuclear ribonucleoprotein U like 1		435.819	369.48	412.362	378.297	353.2	293.067	158.516	124.15	122.716	125.241	131.681	106.47	459.925	346.504	397.661	353.271	380.224	332.591		259.895	153.847	140.978	137.507	124.622	122.909	0.94128
ENSG00000143621	3608	ILF2	interleukin enhancer binding factor 2		429.859	299.568	348.629	270.931	205.73	125.505	116.448	97.4046	101.309	90.1083	81.9374	93.9615	397.635	315.937	337.511	287.882	233.578	211.238		171.457	131.325	109.256	121.461	126.519	113.143	0.941111
ENSG00000106415	113263	GLCCI1	glucocorticoid induced 1		94.1045	77.7513	67.3759	29.6225	34.4929	24.0884	21.163	23.2452	16.406	27.4974	30.1971	34.1688	76.4898	92.6282	87.0225	59.4833	48.4591	51.6126		35.1685	32.0474	20.3341	27.5128	31.7901	30.6565	0.940988
ENSG00000168014	26005	C2CD3	C2 calcium dependent domain containing 3		49.8116	61.9066	52.1498	44.678	38.7699	30.056	24.3698	20.4036	16.16	19.9095	27.5861	29.7859	101.928	56.8972	67.7483	62.7916	54.9718	53.6252		37.702	35.9754	27.4679	24.8821	26.2473	31.927	0.940958
ENSG00000204463	7917	BAG6	BCL2 associated athanogene 6		426.027	512.09	544.031	574.412	427.964	366.59	202.766	269.771	168.627	183.189	207.721	200.228	356.594	361.541	403.206	402.307	393.099	345.487		234.35	164.966	215.442	158.938	155.603	183.975	0.940845
ENSG00000137312	10211	FLOT1	flotillin 1		175.151	129.759	175.352	214.464	187.488	346.407	249.203	320.381	340.998	308.787	293.928	317.237	100.045	157.508	161.12	168.033	175.575	187.987		260.112	337.585	378.818	321.234	394.968	376.206	0.940784
ENSG00000174348	127435	PODN	podocan		0	0	0	0.49204	0.800965	8.26416	5.95738	4.57496	5.68401	4.32669	4.52408	4.20101	0.981169	1.12889	0.794158	1.58288	1.06631	2.27132		6.063	6.55334	9.80109	6.7982	5.43037	5.46267	0.940772
ENSG00000157429	7567	ZNF19	zinc finger protein 19		3.19505	3.07042	3.53385	3.36106	3.66496	1.69306	1.27443	1.8337	1.25429	1.59285	1.27246	0.961539	4.84003	4.11665	3.9739	4.41111	4.7955	4.23682		2.51519	1.77768	1.82234	1.27466	1.51194	1.48675	0.940759
ENSG00000196782	55534	MAML3	mastermind like transcriptional coactivator 3		34.7224	30.2265	23.2734	31.5436	21.3996	9.97398	8.0427	5.39992	3.60093	3.98388	6.70294	5.33521	56.1865	42.055	32.6422	42.8814	34.3143	25.0541		11.1046	10.704	6.62225	6.73838	4.90289	5.24733	0.94074
ENSG00000186104	120227	CYP2R1	cytochrome P450 family 2 subfamily R member 1		11.4972	13.6776	16.2714	17.3427	16.8987	13.4272	7.26116	5.62207	6.94818	4.12576	5.91289	4.46969	20.0325	21.8888	21.598	22.8998	22.7075	25.7204		14.89	10.6373	9.75828	12.8284	12.4384	10.2938	0.940703
ENSG00000247157	338817	LINC01252	long intergenic non-protein coding RNA 1252		0	0	0	0	0	0	0.433663	0.869784	0.963454	0	1.16787	1.42909	0.963751	1.4077	1.19344	1.06083	0.801091	0.750343		1.3065	2.24208	1.97682	1.39778	2.714	3.22294	0.940609
ENSG00000155592	342357	ZKSCAN2	zinc finger with KRAB and SCAN domains 2		37.8601	72.8934	59.2909	43.2478	33.8443	8.80057	10.1992	9.31177	6.06502	5.68604	9.91863	8.94674	53.4802	47.4452	58.6068	66.8717	54.0011	50.0469		22.4991	10.8639	9.66095	8.30276	9.44717	10.9142	0.940389
ENSG00000198865	100129792	CCDC152	coiled-coil domain containing 152		7.03059	4.88673	4.73984	2.39951	1.96564	0.586705	1.54613	0.675649	1.38997	1.5691	1.45774	1.83896	34.1369	21.0387	14.1847	10.1379	7.93205	8.76687		1.94808	3.57251	2.09809	2.81063	2.4874	2.65349	0.940371
ENSG00000110446	51296	SLC15A3	solute carrier family 15 member 3		2.3674	1.76338	1.11345	1.32343	1.31745	8.90115	6.04244	5.9378	7.82521	6.73833	5.80934	5.49691	2.17011	1.69263	1.37294	2.05064	0.615279	1.3003		5.18971	6.74322	6.89849	5.16772	4.67565	3.62124	0.940355
ENSG00000153896	148103	ZNF599	zinc finger protein 599		8.68941	14.1677	13.0591	9.25587	10.2372	5.81676	5.80922	3.52638	4.19505	2.44823	2.60509	2.29625	11.8873	14.3148	15.7376	17.1131	17.0539	14.4215		8.05164	6.4532	5.09909	4.53433	4.44525	3.09775	0.940272
ENSG00000121406	256051	ZNF549	zinc finger protein 549		16.4231	24.2309	20.4213	22.7129	18.6981	6.99017	5.77367	5.67385	4.97817	4.55393	6.86314	6.39129	21.9292	26.4419	31.0963	32.9912	42.8116	36.5665		16.001	13.4385	6.70084	5.80926	8.53807	9.58089	0.940265
ENSG00000120616	80314	EPC1	enhancer of polycomb homolog 1		69.4616	112.575	109.398	81.378	80.6898	35.8896	25.6605	18.854	18.7318	16.342	20.3806	18.7229	98.589	100.491	104.796	115.233	107.674	110.258		63.4193	37.2692	24.4132	31.1003	31.4837	30.8868	0.940251
ENSG00000180592	387640	SKIDA1	SKI/DACH domain containing 1		37.285	19.1175	18.7041	20.2738	15.8825	7.05722	6.5023	4.19949	5.12347	4.7468	7.02601	7.62902	80.6058	32.9598	28.5878	16.2588	19.9058	15.5066		8.22341	4.19766	3.26938	3.66755	4.75298	6.14683	0.940244
ENSG00000131795	---	---	---		91.936	85.645	81.4732	57.3944	68.2325	48.663	42.321	37.7162	44.4513	23.8275	40.1893	36.7072	199.877	175.108	164.562	167.619	148.682	147.406		111.908	85.7841	79.2823	78.2967	79.4294	76.2911	0.940104
ENSG00000196639	3269	HRH1	histamine receptor H1		0.472309	0.813745	0.767599	1.0803	1.3783	5.51502	8.15036	11.2018	7.74724	8.23511	14.2315	13.3767	0.661091	0.970811	0.930362	2.61977	0	1.81823		7.43599	13.8742	9.10214	4.54852	13.3657	17.7435	0.940084
ENSG00000143971	54465	ETAA1	ETAA1 activator of ATR kinase		15.0392	9.3328	8.29429	5.59787	7.20071	3.9393	4.9277	4.39985	4.72809	3.63122	4.54108	4.67375	28.4402	20.4089	15.1939	14.2116	11.8147	13.8366		7.74344	7.81755	7.24958	9.68647	7.80529	7.75009	0.940041
ENSG00000114646	10675	CSPG5	chondroitin sulfate proteoglycan 5		32.0215	27.5266	34.8447	118.887	195.338	599.596	637.332	231.15	392.71	171.207	224.23	134.025	23.8727	59.8038	34.056	106.574	93.2352	179.475		414.28	251.896	235.87	192.313	179.99	179.415	0.939986
ENSG00000189410	400745	SH2D5	SH2 domain containing 5		0.899046	0	0	1.10093	1.78748	5.21329	11.4209	30.322	16.387	30.7517	56.6394	79.1344	4.40387	4.24959	1.06368	2.38556	1.11191	1.25999		7.59881	32.9203	42.688	24.4393	46.6435	91.3142	0.939955
ENSG00000110013	54414	SIAE	sialic acid acetylesterase		3.52143	3.0289	3.89602	7.19741	14.2707	29.0838	30.6217	67.8319	50.9979	72.6162	59.6502	69.8947	5.8973	6.88186	3.87527	9.13545	8.82927	10.8938		32.2316	41.6078	66.1064	71.2218	67.6317	71.8346	0.939934
ENSG00000163257	54876	DCAF16	DDB1 and CUL4 associated factor 16		54.5933	45.0703	37.3122	31.7629	28.5008	24.8595	19.6386	9.06623	17.8638	12.9367	18.5833	25.1722	89.9195	82.736	88.8347	58.935	60.5835	55.6738		35.9566	16.3143	19.8553	22.5397	20.5007	27.2801	0.939916
ENSG00000111790	26127	FGFR1OP2	FGFR1 oncogene partner 2		30.0748	23.9998	24.5994	15.6785	17.3767	13.6283	26.7103	39.7408	35.1292	44.9343	50.9366	66.0871	49.8151	48.7695	39.8435	28.3109	28.8094	33.5428		28.0417	52.8366	53.55	72.0174	87.5399	88.82	0.939866
ENSG00000132017	90379	DCAF15	DDB1 and CUL4 associated factor 15		54.7094	45.2067	50.8664	59.6886	48.6044	36.1578	24.5791	21.3853	24.268	13.3069	17.7553	16.0095	67.4933	65.2372	57.0499	47.7388	52.2244	45.873		30.5959	24.0092	20.46	18.8002	19.636	18.3698	0.93984
ENSG00000131100	529	ATP6V1E1	ATPase H+ transporting V1 subunit E1		89.1111	101.035	131.929	98.9221	107.634	178.409	187.99	365.201	286.138	366.176	382.69	477.097	40.2238	67.8827	74.9427	84.1433	80.3819	75.6338		118.485	248.902	384.959	399.15	466.147	485.731	0.93979
ENSG00000126247	826	CAPNS1	calpain small subunit 1		197.01	149.053	182.932	225.465	208.974	385.934	315.121	357.348	388.356	321.965	405.094	404.237	133.666	143.649	155.325	163.374	165.783	167.315		242.563	284.447	395.33	364.325	402.597	432.082	0.93974
ENSG00000198221	653483	AFDN-DT	AFDN divergent transcript		17.7821	30.069	23.7577	28.2286	21.6427	11.5832	3.92546	1.19375	2.34589	1.43918	0.83028	0.953677	12.0186	32.1262	29.3357	27.8831	40.2521	36.7471		12.855	2.50262	2.00244	2.10553	1.549	1.28003	0.939611
ENSG00000228638	---	---	---		5.52064	5.34593	5.08853	6.38384	6.78311	1.62601	3.11696	1.3688	2.19032	0.957514	2.08009	1.762	6.52611	6.65011	5.705	7.5022	8.35966	7.57164		4.40693	3.97569	3.51594	3.52924	3.26058	3.33574	0.939591
ENSG00000179101	---	---	---		3.24599	2.53185	2.93963	0.99969	1.13807	0.989017	0.493629	0.519115	0.673556	0	0	0	0.618308	0.660266	0.618817	0.769119	0	0		0	0	0	0	0	0	0.939562
ENSG00000170144	220988	HNRNPA3	heterogeneous nuclear ribonucleoprotein A3		639.873	446.435	483.839	254.178	321.723	103.109	170.996	196.617	150.566	145.81	199.13	177.569	789.63	635.225	530.974	480.723	444.785	452.973		246.484	274.213	183.312	250.414	261.815	239.826	0.939535
ENSG00000125386	8603	FAM193A	family with sequence similarity 193 member A		51.7492	77.5601	79.5652	79.3778	76.7764	40.315	35.2937	23.8996	22.0889	22.7589	33.2513	33.0925	88.8958	79.029	89.6221	86.8476	90.1094	79.1303		56.2667	46.1694	37.4253	36.418	33.4962	38.6457	0.939505
ENSG00000107679	59338	PLEKHA1	pleckstrin homology domain containing A1		18.97	20.0582	21.5019	24.0181	34.1059	32.7717	30.0589	53.2727	40.1061	75.7582	75.668	101.278	59.993	54.3456	33.3206	47.5408	70.8612	73.7412		56.2335	74.037	75.7617	95.5956	107.955	129.443	0.939398
ENSG00000176182	339344	MYPOP	Myb related transcription factor, partner of profilin		5.78631	10.2854	8.70346	11.6033	9.905	18.5902	18.9916	32.4284	37.601	32.2483	42.9248	41.1707	5.63037	8.82455	8.41064	7.87405	8.87608	7.11984		10.1348	26.0151	45.6241	29.585	36.3981	32.8721	0.939364
ENSG00000227825	121456	SLC9A7P1	solute carrier family 9 member 7 pseudogene 1		0	0.682872	0.516762	0.599274	0.903573	0.586705	0.602845	1.99706	1.24561	2.52889	4.21383	8.1654	0.653995	0	0	1.09449	0	0.46729		0.825738	2.23409	1.63301	1.43415	2.48207	4.91915	0.939355
ENSG00000065833	4199	ME1	malic enzyme 1		2.30976	1.76968	2.45151	4.42341	8.87843	20.7358	33.89	40.0866	49.8468	49.2159	59.1056	44.656	3.71375	2.68588	1.39093	5.56296	1.3621	6.90741		23.6186	40.3726	34.648	33.5855	41.1554	50.7523	0.939354
ENSG00000184949	646851	FAM227A	family with sequence similarity 227 member A		2.73209	2.47273	1.5809	2.47135	1.48882	0.921965	0.800632	0.692286	0.475412	0.767673	0.501847	1.09013	21.8931	14.8166	11.6592	9.29354	8.28798	6.09618		2.70648	3.16571	1.06371	1.06611	1.85223	2.89846	0.939333
ENSG00000104805	4924	NUCB1	nucleobindin 1		91.1304	78.762	89.9173	98.0517	99.6278	289.614	175.554	221.537	208.186	147.76	190.681	181.137	96.7457	84.8276	85.9652	87.5483	79.3459	74.9757		184.588	180.268	207.831	173.074	169.846	184.724	0.939308
ENSG00000121289	84902	CEP89	centrosomal protein 89		29.2355	26.1212	27.9567	25.1885	23.4694	16.2098	9.46598	6.18525	7.67893	5.33621	5.46508	5.75032	39.932	32.7339	37.7822	32.4385	39.2669	32.4194		24.1025	9.98807	8.56578	7.49088	7.93452	7.7426	0.939239
ENSG00000132561	4147	MATN2	matrilin 2		2.65038	3.12637	2.86736	2.59467	4.79506	17.5509	13.7803	9.00671	10.7502	9.66335	11.0448	13.1975	4.67738	3.8233	5.72488	5.09909	2.19859	4.91892		25.6791	12.51	15.2862	18.6748	15.7557	16.0216	0.939217
ENSG00000142910	64129	TINAGL1	tubulointerstitial nephritis antigen like 1		0.701359	1.00403	0.585832	0.559136	1.31395	31.5312	14.4374	9.39173	16.6908	10.0582	11.7577	11.4043	1.13878	0.874626	2.65459	0.958114	2.20374	0.700517		12.779	14.7398	14.4183	9.65189	9.82357	12.6537	0.939174
ENSG00000122970	28981	IFT81	intraflagellar transport 81		49.3359	25.4787	31.4008	18.0541	26.2209	10.0746	10.6889	8.53	6.50003	3.63163	7.22029	7.31354	83.4094	60.7069	47.9392	37.3074	39.4265	35.8199		23.6857	16.0364	11.5604	8.77103	14.0596	13.7931	0.939095
ENSG00000068438	24140	FTSJ1	FtsJ RNA 2'-O-methyltransferase 1		40.7129	42.8998	46.2446	51.8456	43.7235	39.0745	29.6625	27.0709	19.2396	21.9742	19.8874	20.7912	28.9936	36.7117	39.3422	38.3475	41.9442	38.5169		35.7404	24.3552	26.3232	25.3592	25.2352	23.565	0.938976
ENSG00000101222	25876	SPEF1	sperm flagellar 1		0	0	0	0.462982	0.887427	12.2873	20.0522	33.6871	43.6347	22.1191	17.7481	11.4861	0.527519	1.04209	0	0.618925	0.459151	0.664891		5.07188	20.8832	32.6672	20.6401	16.4171	12.0391	0.938972
ENSG00000083454	5026	P2RX5	purinergic receptor P2X 5		0	0	0	1.40501	3.42986	16.4445	7.50133	10.0554	7.78739	6.50489	9.35306	7.94096	0.675085	1.93839	0.675425	1.79734	3.86122	3.02799		13.6204	15.2249	17.01	9.37602	11.8745	12.8128	0.938816
ENSG00000253741	100288181	LNCOC1	lncRNA associated with ovarian cancer 1		0	0	0	0	0	0.620231	0	0.888711	0.715772	1.07419	0.943098	1.40461	0	0	0	0.421435	0	0.48629		1.45217	2.94072	4.85645	3.78923	4.67968	7.405	0.938762
ENSG00000127616	6597	SMARCA4	SWI/SNF related, matrix associated, actin dependent regulator of chromatin, subfamily a, member 4		410.048	599.952	589.167	566.129	484.731	209.856	173.055	128.212	89.2026	108.317	164.705	163.452	582.958	519.431	510.825	490.664	466.651	345.726		218.634	129.349	150.234	121.397	130.281	155.928	0.938633
ENSG00000168137	55209	SETD5	SET domain containing 5		109.775	122.131	99.8267	116.651	120.317	105.892	97.0599	60.3388	51.4562	40.4145	67.8904	80.0427	280.063	200.511	199.996	186.916	204.763	190.797		182.207	111.214	76.5135	82.5228	81.0348	103.292	0.93846
ENSG00000169184	4330	MN1	MN1 proto-oncogene, transcriptional regulator		204.098	576.871	517.347	828.588	736.022	162.752	69.361	54.9532	30.3222	40.2531	49.9844	25.5505	172.31	214.054	233.295	420.05	725.727	657.359		171.333	87.5855	62.1576	19.7613	23.0238	16.6065	0.93835
ENSG00000250132	---	---	---		1.30798	2.09805	1.97566	2.23974	1.71103	1.2237	0.874615	0.521121	1.04571	0.94427	1.2251	1.17736	7.62082	9.39869	11.0669	10.6779	11.8647	10.4422		5.15178	4.49044	5.82348	4.50148	5.33647	6.52245	0.938298
ENSG00000104299	55756	INTS9	integrator complex subunit 9		23.6076	27.1007	27.6681	28.1955	20.1322	19.8977	10.7278	12.2695	11.7372	10.7667	11.3025	11.3895	35.1055	25.9234	27.7554	25.2948	26.3899	25.9367		16.6904	14.2721	11.938	13.3441	12.1092	11.9219	0.938279
ENSG00000142549	402665	IGLON5	IgLON family member 5		114.772	203.659	200.62	205.809	136.568	83.3624	44.4613	26.4862	24.4879	20.3291	30.8114	27.6206	82.1749	175.234	181.985	206.04	163.856	147.507		91.1241	39.2116	46.9371	25.6071	34.8216	44.6895	0.938262
ENSG00000160050	79140	CCDC28B	coiled-coil domain containing 28B		24.5275	30.2548	45.0223	63.8873	54.52	35.1185	34.1153	12.7108	22.0641	6.81695	10.0009	6.41365	10.7766	35.7816	25.9455	31.8247	48.459	45.9334		30.5151	16.0121	19.4799	16.2115	13.9055	10.4804	0.938217
ENSG00000021762	114879	OSBPL5	oxysterol binding protein like 5		31.9701	54.7712	54.733	97.1192	84.6109	74.1762	43.9844	36.7769	33.6035	17.7603	28.2945	23.317	29.8468	59.495	68.7235	66.0682	110.015	89.5742		64.277	34.2365	36.5805	33.979	26.1475	26.7534	0.938011
ENSG00000083814	79891	ZNF671	zinc finger protein 671		29.7915	34.3969	39.9838	36.8869	32.6396	17.048	13.4104	16.8495	17.1765	9.63847	12.7082	11.6612	18.3848	32.4783	36.7214	34.3234	42.347	38.4329		22.0093	16.9435	13.1482	10.7641	12.6019	14.4164	0.938006
ENSG00000119227	80235	PIGZ	phosphatidylinositol glycan anchor biosynthesis class Z		0	2.65409	1.97428	6.71033	7.77808	14.2318	13.2819	9.97522	10.8799	10.4927	14.8598	18.1681	0.434652	4.08453	2.37894	5.17085	10.4973	5.80194		17.9326	16.4872	15.5186	14.376	16.5552	23.7323	0.937934
ENSG00000099284	55506	H2AFY2	H2A histone family member Y2		227.337	173.919	223.33	146.553	106.969	33.6098	24.7409	20.2952	19.199	14.783	15.3762	11.3265	232.842	217.976	154.679	141.997	69.4193	62.2255		37.9719	19.7628	21.6691	15.5637	18.209	15.1315	0.937864
ENSG00000101146	8480	RAE1	ribonucleic acid export 1		66.9483	73.4431	82.7233	69.9004	70.0401	70.4884	33.4802	40.4633	30.1009	27.7124	29.9837	36.8353	71.6877	66.9568	66.4724	68.8551	67.9735	63.1289		54.2279	43.3478	36.6606	38.4467	43.2439	45.4914	0.937798
ENSG00000170322	4798	NFRKB	nuclear factor related to kappaB binding protein		34.4663	35.4785	28.608	34.758	28.6407	21.8087	24.8671	15.2734	15.1279	12.6681	20.6994	25.1816	94.0972	57.8794	58.0382	49.5177	49.7193	48.5364		31.8213	29.1373	22.7392	20.3344	27.34	31.831	0.937787
ENSG00000181585	259236	TMIE	transmembrane inner ear		0.865708	1.55797	1.81529	4.66869	5.34199	7.82832	7.85262	7.36452	10.6388	3.41695	10.6426	10.4926	0.471372	1.56948	1.3994	2.38075	3.11682	4.8075		9.99946	10.0324	9.93634	5.96338	10.9194	13.1054	0.937704
ENSG00000051108	9709	HERPUD1	homocysteine inducible ER protein with ubiquitin like domain 1		26.9368	35.9369	31.8564	31.9853	31.6054	68.108	75.2373	66.0699	73.8996	56.8797	73.3658	75.4664	20.2553	35.0237	36.3052	37.5531	37.3127	37.7263		76.958	100.61	90.0313	75.2036	83.5374	82.7614	0.937702
ENSG00000196378	80778	ZNF34	zinc finger protein 34		10.9309	15.6422	18.4163	21.4106	17.2677	13.863	8.78754	5.65596	6.48647	6.15951	7.76819	6.80919	11.7607	17.6411	19.3915	17.7321	24.6713	21.5036		14.8072	11.5218	11.1745	13.0765	11.5065	12.582	0.937686
ENSG00000108828	10493	VAT1	vesicle amine transport 1		261.109	244.54	279.664	301.651	268.987	225.01	120.865	73.098	86.2371	51.654	65.8653	68.4095	175.557	259.858	214.333	264.306	227.076	186.375		172.223	62.1579	57.7435	59.8389	57.7076	58.2545	0.937598
ENSG00000099953	4320	MMP11	matrix metallopeptidase 11		5.79102	11.2836	17.7806	20.2854	17.1429	14.2653	1.47115	0	0	0.906605	0	0.491082	12.2482	11.4425	15.2411	23.4144	18.6091	24.8337		9.89765	0.906022	1.28658	0.913017	0.543161	0.969652	0.937459
ENSG00000153404	153478	PLEKHG4B	pleckstrin homology and RhoGEF domain containing G4B		17.1108	8.35372	5.8422	11.9582	10.5885	6.15202	1.64039	0.432041	0	2.18019	0	0	71.495	31.5947	24.5236	20.9925	24.7834	25.4789		10.9393	1.39218	0.703746	0	0.453915	0.567399	0.937389
ENSG00000187792	7621	ZNF70	zinc finger protein 70		5.48803	7.59485	5.43693	10.87	7.31329	6.65491	2.64695	1.42659	2.19953	1.14106	2.92214	3.58645	12.1949	6.18598	9.34827	8.26437	13.1825	12.0408		5.00739	2.38199	1.43733	1.0165	1.49886	2.47736	0.937349
ENSG00000163872	55689	YEATS2	YEATS domain containing 2		73.7076	111.274	98.5021	105.893	93.8712	61.604	45.4813	43.8944	29.2414	33.8455	46.9067	62.9169	184.871	142.387	174.767	150.737	198.857	168.764		113.103	69.2251	68.2478	66.7081	73.3361	86.447	0.937341
ENSG00000166704	80095	ZNF606	zinc finger protein 606		47.1889	53.9151	52.4247	35.8777	30.2949	12.2537	13.7848	7.03487	6.85385	6.83018	8.85769	7.2877	49.3453	48.4905	54.6686	48.8231	54.9674	48.5766		22.1555	14.3253	9.68676	12.2103	11.5767	12.2519	0.9373
ENSG00000183654	441061	MARCH11	membrane associated ring-CH-type finger 11		0	1.19471	1.32678	1.87823	2.4152	6.15202	5.37959	8.55908	6.21222	4.9099	5.1556	4.267	0	1.52623	0.85142	0.982535	1.4103	0.970823		4.73941	10.4491	7.4538	3.60761	4.74064	4.91545	0.93724
ENSG00000198185	55713	ZNF334	zinc finger protein 334		15.5097	13.3363	11.4058	13.8476	11.4698	7.79479	6.9431	4.51982	3.74451	3.96599	6.6303	6.46722	49.2625	49.7931	35.1025	34.0405	30.5805	35.1627		21.1116	19.4149	13.2747	12.7684	16.3638	17.4707	0.937199
ENSG00000196230	203068	TUBB	tubulin beta class I		3209.04	3400.84	4439.5	3620.35	3644.15	2533.34	844.92	1028.08	471.032	417.851	448.633	350.14	3464.17	3708.72	4237.68	3733.29	4589.73	3776.74		2299.64	732.776	679.08	413.78	557.327	539.594	0.937185
ENSG00000196793	8187	ZNF239	zinc finger protein 239		12.3705	16.8756	19.8529	17.9108	16.1466	6.3867	8.01326	11.7657	7.40659	6.46012	6.7106	6.54542	14.0225	12.3481	17.1862	18.4258	21.6549	16.8799		9.91958	12.0479	11.1207	8.02726	11.129	8.80053	0.937169
ENSG00000111642	1108	CHD4	chromodomain helicase DNA binding protein 4		386.685	311.427	315.661	274.424	240.54	99.9577	117.353	132.914	100.495	79.7284	144.718	129.207	741.287	433.287	382.011	338.917	216.56	279.763		185.449	126.144	127.007	144.734	136.094	137.196	0.936961
ENSG00000096093	114327	EFHC1	EF-hand domain containing 1		19.4623	12.4575	12.3231	14.4639	13.8443	13.863	12.168	11.3983	9.97691	9.01749	9.98139	11.8636	67.7614	60.337	28.9172	33.3611	32.457	28.9224		25.5964	20.2369	14.0163	20.7191	20.1613	20.9945	0.936898
ENSG00000171502	255631	COL24A1	collagen type XXIV alpha 1 chain		0	0	0	0	0.623936	0.754335	2.41428	4.16917	10.5808	6.27744	9.72692	11.1422	15.7579	2.77676	1.02589	2.40451	2.44434	0.882647		3.97801	14.262	21.5549	19.5672	38.9063	31.5482	0.936788
ENSG00000213722	23564	DDAH2	dimethylarginine dimethylaminohydrolase 2		332.345	251.021	312.927	364.87	237.189	174.788	58.1482	25.5479	48.9197	18.3508	25.4094	15.2999	202.75	272.097	306.356	221.139	280.71	271.179		117.772	38.5583	28.653	25.4501	21.04	22.4149	0.93678
ENSG00000063244	11338	U2AF2	U2 small nuclear RNA auxiliary factor 2		274.531	196.503	240.476	230.443	199.125	177.168	128.307	127.188	127.356	93.2613	103.193	100.829	283.895	256.594	243.56	221.828	227.13	216.962		183.183	150.497	137.054	135.247	137.984	126.356	0.936688
ENSG00000168795	9925	ZBTB5	zinc finger and BTB domain containing 5		93.61	95.4087	91.3005	62.8558	56.2025	34.515	18.7102	10.6895	13.7941	11.995	13.0798	12.0858	69.0709	64.068	71.0388	69.4027	68.2618	62.2747		36.1265	14.6434	10.5982	14.6211	11.8666	11.779	0.936562
ENSG00000163898	200879	LIPH	lipase H		0	0	0	0	0	0	0	1.19887	0.772489	1.92255	1.08107	1.44142	0	0	0	0	0	0		0	0.729847	0.568206	1.13269	1.31009	1.1254	0.936517
ENSG00000182986	162967	ZNF320	zinc finger protein 320		15.8907	16.9365	18.3093	15.7859	16.7984	6.3867	6.10844	5.96821	5.28638	4.23353	4.87284	6.24911	53.0954	45.3394	37.8399	37.3322	46.9393	44.3146		24.1351	17.756	12.0009	10.3206	9.38594	10.9346	0.936332
ENSG00000196502	6817	SULT1A1	sulfotransferase family 1A member 1		3.81093	4.20145	4.42435	7.45372	6.94537	7.32543	18.3411	23.3558	31.6873	27.8235	24.3488	22.9911	6.76395	10.6353	12.1611	10.8325	18.8587	12.3895		20.0437	24.8226	42.3219	31.7066	26.7473	35.0038	0.936325
ENSG00000161011	8878	SQSTM1	sequestosome 1		47.9245	54.2486	64.5644	65.8195	62.2937	144.447	99.0355	158.359	123.937	161.784	144.46	125.379	38.7821	65.7759	77.3553	85.1491	98.4062	85.8441		218.176	250.596	250.242	238.553	262.488	259.068	0.936323
ENSG00000182934	6734	SRPRA	SRP receptor subunit alpha		38.5721	29.5366	25.1296	31.06	31.1642	61.6711	52.4323	71.3825	43.6924	50.2954	76.412	113.21	70.5789	46.9213	41.3225	44.2965	34.7556	38.44		56.0835	69.4872	69.3383	77.1054	89.1053	117.492	0.936262
ENSG00000074657	55205	ZNF532	zinc finger protein 532		175.583	222.135	179.444	191.812	148.737	95.834	94.0559	43.6021	41.604	34.984	65.0624	57.991	339.426	243.707	301.744	337.818	353.81	322.436		172.084	97.7841	79.2089	88.1438	82.6156	90.2108	0.936219
ENSG00000178522	258	AMBN	ameloblastin		5.16752	0	0	0	0	0	0	0	0	0	0	0	3.10957	1.86008	0	0	0	0		0.450516	0.542139	0	0	0	0	0.936042
ENSG00000030066	23279	NUP160	nucleoporin 160		122.162	101.376	94.6806	60.4136	62.7294	21.3728	18.3711	11.1974	13.7132	11.7636	10.862	12.6361	208.588	100.084	109.338	98.2215	92.9804	88.1729		44.3466	23.3873	12.7008	17.9336	17.0494	15.9865	0.935937
ENSG00000148834	9446	GSTO1	glutathione S-transferase omega 1		31.2793	12.2556	20.3694	30.0282	30.4879	59.3913	63.0356	75.6218	111.104	86.8147	84.2439	75.7482	18.9815	13.4319	15.323	14.7543	12.7147	21.7469		37.2735	73.7389	93.9854	103.275	95.9614	85.7044	0.935933
ENSG00000079819	2037	EPB41L2	erythrocyte membrane protein band 4.1 like 2		53.0037	16.8733	13.9328	21.8518	35.5254	89.0953	156.901	141.758	164.893	162.793	174.982	172.72	132.358	44.4745	42.3532	45.2382	45.3919	67.748		184.604	264.356	276.461	303.338	241.112	208.997	0.935911
ENSG00000117713	8289	ARID1A	AT-rich interaction domain 1A		178.121	323.795	273.741	239.72	236.872	119.47	98.1539	60.3078	46.7432	75.3243	99.2367	85.1125	412.713	271.345	330.662	313.648	352.151	278.335		158.305	89.9422	82.7739	61.9185	66.3112	75.1315	0.93589
ENSG00000135047	1514	CTSL	cathepsin L		30.9777	20.1983	20.4144	22.1447	26.5634	63.0791	63.6869	75.692	77.3223	79.867	53.9195	56.3459	23.6296	24.9957	28.2557	25.9097	21.4763	24.5464		69.8374	94.3631	107.822	110.483	105.95	77.1561	0.935869
ENSG00000182872	8241	RBM10	RNA binding motif protein 10		114.563	97.2959	106.743	144.201	105.589	73.8075	57.5415	53.3574	50.1356	37.1443	55.9487	55.0171	137.965	165.64	150.696	138.928	161.724	141.584		90.4586	79.6149	88.5685	90.1879	81.4612	74.8877	0.935775
ENSG00000072609	55743	CHFR	checkpoint with forkhead and ring finger domains		44.5802	58.9653	58.3208	59.5741	56.2174	37.5659	31.1051	19.9095	19.6913	13.2889	17.68	16.4894	32.6418	50.5796	52.5864	50.2843	69.7402	51.4365		38.5998	32.1835	25.257	26.621	22.5362	21.6818	0.935767
ENSG00000151414	140609	NEK7	NIMA related kinase 7		26.2088	5.00916	3.2274	2.87976	3.73819	11.5497	25.776	24.1781	31.2105	64.8526	49.1699	39.014	32.1879	22.7479	15.4607	9.31777	4.30891	10.8056		13.041	20.348	21.587	35.4205	29.1194	26.4872	0.935703
ENSG00000186577	221491	SMIM29	small integral membrane protein 29		12.8684	21.1715	25.3138	44.4387	37.9383	149.979	122.706	107.387	148.808	98.4068	91.2472	65.4431	4.46783	14.1873	15.5134	22.6067	25.1707	23.7891		59.575	67.6117	109.392	74.9657	77.2535	60.7443	0.935614
ENSG00000169045	3187	HNRNPH1	heterogeneous nuclear ribonucleoprotein H1		654.512	423.599	564.126	415.991	453.688	167.479	147.399	118.287	109.586	92.0615	114.536	114.125	1166.25	971.805	820.651	601.904	663.188	714.36		369.456	319.599	189.427	228.759	224.187	196.09	0.935549
ENSG00000213923	1454	CSNK1E	casein kinase 1 epsilon		335.011	514.738	522.889	506.531	438.409	401.96	182.263	113.865	107.819	102.831	136.58	128.046	295.143	454.517	498.278	480.125	524.151	477.181		377.865	165.54	190.585	152.085	151.558	167.154	0.935454
ENSG00000196345	55888	ZKSCAN7	zinc finger with KRAB and SCAN domains 7		8.40848	11.0773	14.3962	14.1162	11.7836	6.88959	4.71667	1.88003	2.99504	2.00975	2.37136	2.46714	20.8462	20.5354	15.2154	19.7499	22.0937	23.4864		7.88874	3.89106	2.05581	3.57115	2.98343	3.3287	0.935428
ENSG00000105711	6324	SCN1B	sodium voltage-gated channel beta subunit 1		0	0.652221	0	1.51382	1.48146	5.11271	19.8547	39.1869	53.7944	55.655	112.667	174.095	0.877042	2.11525	1.13371	2.12621	2.11851	1.89506		8.43876	32.379	57.5446	123.6	119.409	165.186	0.935287
ENSG00000136950	81873	ARPC5L	actin related protein 2/3 complex subunit 5 like		38.618	36.8242	42.2072	49.9736	46.7991	43.7011	75.2404	111.267	108.823	69.9982	102.542	94.9732	27.3442	35.382	31.8597	30.9562	33.5908	31.4722		51.465	111.105	135.375	99.1266	130.791	118.669	0.935182
ENSG00000154473	9184	BUB3	BUB3 mitotic checkpoint protein		157.929	97.529	115.12	75.2851	69.202	49.367	43.2116	45.3243	40.1334	49.1834	46.4809	47.9049	193.187	149.764	128.908	103.663	92.7673	97.7145		52.0902	47.2236	46.1552	64.1805	57.8853	51.5844	0.934945
ENSG00000119335	6418	SET	SET nuclear proto-oncogene		690.672	503.084	605.066	397.507	431.187	187.461	212.107	226.268	168.1	134.563	192.685	170.862	831.459	612.286	585.978	523.025	547.723	458.329		307.433	256.569	274.393	253.399	251.468	218.743	0.934938
ENSG00000019582	972	CD74	CD74 molecule		2.58936	3.10752	1.87648	2.10648	2.34574	117.458	18.516	50.7268	77.3254	88.1881	61.66	96.0046	7.60439	2.20425	2.78881	4.19945	1.4382	2.98649		41.0282	97.3397	115.708	109.387	125.312	99.6339	0.934924
ENSG00000176293	7694	ZNF135	zinc finger protein 135		12.3826	17.5884	16.0009	24.6078	15.6785	8.66647	8.85231	5.14455	7.82354	6.93662	7.28653	8.11142	40.2882	57.5459	54.1801	47.2982	72.5634	56.2953		22.6574	15.8478	17.6799	22.2056	20.7991	19.82	0.934907
ENSG00000130816	1786	DNMT1	DNA methyltransferase 1		137.133	90.3262	91.7792	108.024	95.5138	35.7555	49.647	34.3064	35.2391	33.5651	41.2509	45.8685	279.849	168.74	165.446	130.989	132.289	102.269		63.6272	45.039	43.5791	45.5495	46.2589	47.5665	0.934894
ENSG00000153922	1105	CHD1	chromodomain helicase DNA binding protein 1		61.7396	45.9631	36.078	27.5093	27.3983	9.26994	13.8573	11.3162	9.68303	7.93081	11.7462	9.65768	151.461	71.6853	65.3473	56.1167	58.5005	52.6108		32.934	28.484	15.174	24.8059	23.8071	20.7327	0.934726
ENSG00000203602	---	---	---		0	0.7085	0.402035	0.702135	0.531204	0	0	0	0	0	0	0	0.805657	0	0.459946	0.577139	0.906662	0.72939		0	0	0	0	0	0	0.934609
ENSG00000114503	22916	NCBP2	nuclear cap binding protein subunit 2		124.42	137.709	159.856	103.782	118.188	58.0167	72.3611	47.8157	48.8863	36.091	59.7378	48.5875	142.626	142.633	141.803	163.492	154.564	154.23		101.211	87.352	77.6021	57.652	65.011	72.915	0.934597
ENSG00000163328	151556	GPR155	G protein-coupled receptor 155		2.25871	7.81161	6.68946	4.3849	8.3206	12.4884	23.6382	17.1145	21.4251	16.7798	26.0125	35.6864	1.83984	7.02467	7.21539	15.2626	13.1846	14.8518		28.671	42.3011	44.6787	42.9351	55.4112	74.6427	0.934576
ENSG00000116560	6421	SFPQ	splicing factor proline and glutamine rich		616.354	433.196	595.028	502.176	536.718	110.351	199.557	215.893	179.983	149.88	169.928	166.178	1071.59	1071.13	929.102	713.96	795.853	847.116		307.56	354.303	264.161	311.41	308.622	273.666	0.934567
ENSG00000178338	117608	ZNF354B	zinc finger protein 354B		6.88229	9.3619	8.52508	8.24283	7.58098	2.53121	3.93646	3.71177	2.70012	2.95208	3.65539	3.24205	20.5769	15.6311	15.9621	17.8599	20.2838	19.6759		10.8662	8.6356	5.24479	6.86344	8.0976	7.63809	0.934555
ENSG00000059573	5832	ALDH18A1	aldehyde dehydrogenase 18 family member A1		113.114	77.7452	97.9878	66.5503	52.2324	46.5508	36.6667	34.5749	26.2461	29.7161	30.9591	30.1107	141.718	89.8601	92.5848	80.8836	60.2943	60.5018		42.2591	37.8604	28.5873	23.2161	25.8145	31.093	0.934544
ENSG00000137574	96764	TGS1	trimethylguanosine synthase 1		29.24	36.7789	33.1461	22.5312	24.3649	8.63294	8.77141	8.51697	6.30818	6.09745	7.6834	8.53941	47.0868	28.599	36.1415	30.2846	34.6004	31.1483		16.6438	14.0004	11.6574	9.44832	11.0768	13.3582	0.934402
ENSG00000116679	10625	IVNS1ABP	influenza virus NS1A binding protein		308.635	310.152	332.112	261.844	280.429	125.437	121.784	138.253	76.4343	77.0134	77.5233	81.4874	350.066	316.228	333.479	325.377	380.292	343.027		193.773	177.34	115.319	170.734	137.599	85.139	0.934326
ENSG00000259826	---	---	---		0.454117	0.799622	0.877541	0.744903	1.0158	0.653757	1.60369	2.23876	1.97325	1.93077	2.57279	2.49653	0.88821	0.92704	0.529785	1.07863	0.718528	0.913244		1.19247	3.16612	2.99615	2.52739	2.99599	3.13979	0.934316
ENSG00000088930	22803	XRN2	5'-3' exoribonuclease 2		187.669	172.909	195.091	117.559	97.5067	52.0156	41.8854	46.253	31.6843	27.6044	30.2942	28.9811	222.324	139.415	164.08	147.15	144.88	118.304		75.289	52.0902	37.8211	32.951	39.1855	37.016	0.934215
ENSG00000175093	92369	SPSB4	splA/ryanodine receptor domain and SOCS box containing 4		36.0579	15.0745	13.7785	17.5315	12.4976	4.30809	4.25207	1.15316	2.45192	1.93282	1.7298	1.55036	49.2847	29.1149	20.2643	17.7812	11.2597	15.3388		6.68	3.8801	3.15304	1.3329	1.31414	1.73508	0.934213
ENSG00000176454	254531	LPCAT4	lysophosphatidylcholine acyltransferase 4		13.4973	23.8463	20.3008	38.8649	42.0268	65.8283	56.1819	96.3104	81.8376	82.8735	112.083	127.26	37.8489	71.2447	59.667	61.0403	85.1822	67.4119		81.5171	112.038	139.017	107.161	144.694	177.168	0.934197
ENSG00000143147	23432	GPR161	G protein-coupled receptor 161		53.2054	73.2799	63.8222	64.0071	53.9417	26.5358	12.8332	12.056	5.25515	6.23326	6.31167	5.91737	48.2017	31.1348	44.4387	46.0334	56.4836	47.1539		26.5943	7.83197	4.59881	3.81198	4.07869	5.06573	0.934165
ENSG00000198171	65992	DDRGK1	DDRGK domain containing 1		30.389	28.227	29.8195	41.8433	39.6789	39.7115	46.6424	63.0586	96.2506	81.2643	80.8366	75.5489	27.0838	42.3089	34.8255	29.4314	36.6537	32.7424		48.8402	69.2837	138.915	161.98	150.91	109.376	0.934153
ENSG00000158526	90121	TSR2	TSR2 ribosome maturation factor		45.7525	29.018	41.123	43.7004	50.396	47.3555	60.8546	92.9775	94.1971	116.647	102.097	100.647	38.9461	40.0426	37.534	36.93	34.9634	39.2255		46.7324	89.7665	138.468	147.15	155.942	166.952	0.934073
ENSG00000145014	93109	TMEM44	transmembrane protein 44		16.4788	42.5024	49.1635	54.3426	57.0826	36.426	11.262	6.60612	7.02235	6.5829	7.11534	8.57171	31.1722	37.1698	39.3495	48.4385	64.6936	58.132		31.2401	12.4758	11.66	10.5894	11.0264	14.4264	0.934069
ENSG00000235478	100996342	LINC01664	long intergenic non-protein coding RNA 1664		0	0	0	0.820189	0.515929	1.76011	2.71799	2.62188	4.65626	3.10943	2.18134	1.33275	0	0.420446	0	0.450328	0	0.713835		2.24741	4.52559	6.19929	4.22874	3.4814	2.83245	0.934002
ENSG00000114745	64689	GORASP1	golgi reassembly stacking protein 1		39.6438	38.5521	37.7156	43.0164	44.3777	69.9855	67.8955	74.8302	58.8667	62.8673	67.6132	64.0736	50.3023	54.5308	52.8174	53.8604	56.7748	50.1671		75.3004	85.5168	76.8999	68.9419	69.6712	75.5051	0.933992
ENSG00000186088	54103	GSAP	gamma-secretase activating protein		1.35671	1.4575	1.55995	3.33196	4.89233	4.30809	8.30284	6.69577	6.99359	6.19151	9.93879	10.7675	3.34822	6.68627	4.49094	6.41866	5.86615	10.7915		11.9008	14.8586	12.2447	12.4341	16.5395	21.7754	0.933936
ENSG00000095932	284422	SMIM24	small integral membrane protein 24		0	0	0	0	0	0	0	0	1.20142	2.5215	7.14316	5.29548	0	0	0	0	0	0		0	0	1.75156	1.06313	4.78107	6.19371	0.933875
ENSG00000163833	51725	FBXO40	F-box protein 40		0	0	0	0	0	0	0	1.15422	0.654876	1.96124	2.97782	4.30277	0	0	0	0	0	0		0	0	1.41999	1.40696	2.54235	5.7892	0.933618
ENSG00000166971	64400	AKTIP	AKT interacting protein		21.1039	24.4878	25.1202	29.9271	32.4464	46.4167	54.6873	69.2869	55.3246	59.2177	82.4213	82.3787	20.2489	32.962	28.6079	34.9571	43.782	44.6185		45.3541	70.2673	77.7186	75.1427	92.2103	86.5274	0.933484
ENSG00000197746	5660	PSAP	prosaposin		651.918	736.077	805.05	642.494	673.999	1512.84	1258.33	1946.68	1496.48	1820.01	1756.75	1945.59	480.824	512.143	532.193	654.662	442.698	506.38		868.876	965.32	1159.27	1156.26	1170.32	1434.34	0.933482
ENSG00000132003	65249	ZSWIM4	zinc finger SWIM-type containing 4		38.1739	50.5332	44.8397	64.6595	47.0071	21.1046	17.7319	13.1576	8.46721	10.5056	12.4898	10.8427	39.5357	48.7025	43.0179	38.8419	46.458	40.1063		23.2344	9.83549	8.45731	6.0909	7.50016	8.07839	0.933403
ENSG00000053108	23105	FSTL4	follistatin like 4		1.51804	2.01898	1.49283	1.84021	1.13262	3.83873	6.35546	15.1405	8.38217	15.5068	29.4462	42.649	1.75843	2.82977	1.00485	5.21128	1.3459	1.79254		4.66507	16.8006	21.1783	11.8657	23.0806	41.6448	0.933359
ENSG00000179673	388394	RPRML	reprimo like		0	3.08901	2.98593	6.11202	4.54842	19.2272	18.7601	20.1578	25.0882	7.83422	13.419	10.3364	0	0.77974	0.513633	0.593968	2.62485	1.12452		6.59535	7.35206	11.4913	5.16733	7.79805	6.40165	0.933329
ENSG00000086289	54749	EPDR1	ependymin related 1		13.1434	3.28224	4.70284	5.60952	7.24573	16.6121	23.4578	59.4975	32.8393	62.2075	68.97	96.9349	5.76917	5.57103	7.47478	11.0449	5.1311	8.38171		23.7072	47.1148	60.5239	47.1883	67.3879	86.7874	0.933325
ENSG00000106330	64598	MOSPD3	motile sperm domain containing 3		32.7865	40.3043	44.1403	58.3954	50.0086	55.0664	37.5342	18.6384	29.3347	16.0622	16.4372	12.6005	18.1574	30.0848	26.7189	32.3881	32.3439	31.4624		27.6774	16.5735	20.0894	16.5454	13.7626	12.1747	0.93328
ENSG00000116661	26232	FBXO2	F-box protein 2		1.97419	2.15377	3.80701	10.9806	14.3064	48.1601	79.9799	108.479	176.396	128.807	164.807	120.221	0.486658	1.82712	1.11247	3.28896	1.26984	3.25033		19.793	80.2374	114.013	81.0504	113.388	131.123	0.933175
ENSG00000140995	54849	DEF8	differentially expressed in FDCP 8 homolog		42.6859	54.8448	53.5791	92.887	82.7661	88.056	102.702	110.834	121.4	88.8951	101.4	104.92	51.6331	73.0696	63.9473	77.6822	101.373	84.6803		100.908	119.014	124.89	109.076	115.77	119.196	0.933116
ENSG00000131238	5538	PPT1	palmitoyl-protein thioesterase 1		95.8781	65.6635	72.9434	52.1606	55.1131	102.237	121.416	160.224	156.901	177.011	154.18	180.337	115.959	72.9163	78.3614	89.1736	75.5578	68.0793		95.2837	172.421	196.3	195.377	206.772	225.909	0.933102
ENSG00000242687	---	---	---		3.02806	4.76662	3.29605	4.95339	4.64074	1.19017	1.82329	0.872363	0.887837	1.13327	1.03851	1.38002	7.06847	8.2283	9.31929	11.5409	13.1686	12.4524		6.70964	2.91653	2.09598	2.98387	1.83998	1.92527	0.933091
ENSG00000148660	818	CAMK2G	calcium/calmodulin dependent protein kinase II gamma		48.6637	102.31	104.472	103.564	117.655	161.88	167.603	188.988	239.484	227.146	302.308	357.296	52.3209	62.4835	88.7008	98.6033	169.095	100.942		165.25	138.234	212.448	169.662	257.076	358.147	0.933021
ENSG00000109854	10553	HTATIP2	HIV-1 Tat interactive protein 2		0.908315	1.35851	1.54385	3.28933	4.17101	7.39248	7.22548	10.947	12.5544	15.7436	11.1993	13.6617	1.19139	1.02891	1.05041	0.889758	2.35735	3.20909		7.67651	13.9939	16.0104	32.0006	25.3093	18.5042	0.932986
ENSG00000138750	53371	NUP54	nucleoporin 54		50.4759	34.0074	37.1011	26.3035	29.9368	17.2156	15.4614	12.0178	14.9005	13.9021	12.5962	13.8947	72.2575	54.7276	48.2115	40.439	41.7019	43.3501		26.701	21.821	19.5933	29.4268	27.2138	23.6034	0.932738
ENSG00000108312	7343	UBTF	upstream binding transcription factor		216.241	279.775	278.928	275.995	276.455	162.014	160.568	137.458	120.282	88.5398	134.792	114.477	199.834	244.342	278.968	263.613	296.194	227.255		167.127	162.804	181.334	142.53	152.978	134.905	0.932644
ENSG00000172432	54676	GTPBP2	GTP binding protein 2		44.5658	45.2061	48.4384	59.5262	54.6429	52.7196	27.7819	16.8153	23.8517	20.4581	23.58	31.1161	79.4381	75.0025	73.3824	70.8357	82.9621	76.4544		57.7451	41.2367	31.5905	38.8316	39.0731	42.5107	0.932537
ENSG00000112796	59084	ENPP5	ectonucleotide pyrophosphatase/phosphodiesterase family member 5		0.992492	2.09106	2.02701	1.84315	2.38481	6.42023	10.1821	26.5413	14.096	46.1828	42.0309	49.7599	2.08584	1.45864	1.96536	3.50221	2.51194	2.38386		8.17612	21.8267	28.6801	30.1609	40.4112	51.3943	0.932512
ENSG00000162714	84838	ZNF496	zinc finger protein 496		79.3245	80.2366	77.7802	78.4665	53.7637	34.1462	22.2975	21.8087	18.0669	18.4556	20.1492	22.2751	99.7119	69.4168	79.9749	71.0493	88.7396	74.5317		48.017	25.5653	24.6516	25.1125	23.8954	29.1641	0.93246
ENSG00000116455	79084	WDR77	WD repeat domain 77		30.2414	28.4629	28.1042	24.6306	19.5377	12.4884	17.9742	19.7678	16.9617	12.3564	16.0468	16.0868	35.2488	28.3682	28.2436	27.3233	22.8541	22.6481		13.4425	17.0609	16.2384	14.8747	13.7222	14.0649	0.932405
ENSG00000100056	8220	ESS2	ess-2 splicing factor homolog		27.4159	41.8367	42.8963	46.8903	34.3229	36.8953	26.818	27.1001	24.7785	17.6252	23.9873	19.499	26.4489	37.2489	43.8206	41.2811	46.6813	36.257		30.4317	27.7708	26.2025	27.187	25.7468	25.3295	0.932337
ENSG00000156304	57466	SCAF4	SR-related CTD associated factor 4		56.8728	57.906	55.4545	51.429	53.1578	28.9497	26.3709	26.4369	18.2797	24.2749	28.0062	31.0546	111.434	72.7312	77.4649	62.2258	66.6354	57.4806		46.7862	34.8368	28.6555	23.7865	29.0697	31.4564	0.932292
ENSG00000137513	79731	NARS2	asparaginyl-tRNA synthetase 2, mitochondrial		39.6496	32.1527	39.9299	22.1088	24.7506	28.5474	11.7329	10.1522	9.24551	9.94711	10.8297	10.1825	45.872	32.6933	36.0088	34.0509	29.0524	28.0234		18.9807	13.2269	12.4953	8.71501	12.1506	13.1016	0.932291
ENSG00000198218	54870	QRICH1	glutamine rich 1		94.0474	119.479	118.868	113.607	107.679	78.7358	52.4956	56.1617	41.6705	55.8859	60.5794	73.2669	134.931	125.146	134.128	116.905	131.191	117.502		85.9401	68.5222	70.1904	64.4529	75.2883	82.347	0.932273
ENSG00000135999	26122	EPC2	enhancer of polycomb homolog 2		87.8955	124.594	141.291	89.194	101.206	31.8329	34.9678	35.0199	26.8249	38.1799	41.0508	43.87	86.2358	64.4077	79.8798	96.1164	87.4765	92.7532		44.063	37.404	30.0532	27.8141	39.8452	41.6044	0.932134
ENSG00000135472	23017	FAIM2	Fas apoptotic inhibitory molecule 2		43.5987	120.342	115.597	152.383	192.649	389.958	426.333	1125.87	648.084	1236.87	1253.87	1479.35	11.3478	58.4287	63.5254	108.747	149.831	100.11		255.463	640.631	896.722	828.329	917.37	1280.21	0.932132
ENSG00000103855	80381	CD276	CD276 molecule		96.037	89.3155	79.2337	103.649	66.8556	61.6711	23.08	12.1489	17.4696	13.6488	15.0701	12.141	153.359	107.435	95.3097	112.21	96.8964	101.668		60.6544	33.1223	27.6136	17.1399	21.2967	21.2695	0.932109
ENSG00000011083	6534	SLC6A7	solute carrier family 6 member 7		5.15326	9.50027	16.1729	10.8623	9.62809	18.9254	19.9115	33.5833	27.0695	31.952	61.0501	73.6334	0	7.8647	10.1392	16.9283	2.30926	4.63685		21.6425	47.1529	72.1146	66.4809	75.7578	130.642	0.932102
ENSG00000234616	8629	JRK	Jrk helix-turn-helix protein		43.9063	49.8065	37.7092	44.9403	30.9937	10.8792	13.5977	14.7048	7.6763	10.6217	15.3405	19.8542	58.6891	33.6423	42.4724	40.2638	39.3891	40.8433		15.1528	11.0217	11.1002	10.344	12.1179	16.7949	0.932047
ENSG00000233725	---	---	---		0	0	0	0	0	0	0	0	0.440813	1.11559	0.596203	0.423044	0	0	0	0	0	0		0	0	0	1.28621	0.761749	0.555629	0.932006
ENSG00000260231	100134229	KDM7A-DT	KDM7A divergent transcript		0.760139	0.605425	0.802242	2.05897	1.95652	3.70462	2.99293	4.92508	4.75209	4.36886	3.48999	2.88411	0.848923	0.578999	0.518815	0.926721	0.74845	0.840293		2.08725	6.72149	5.35323	3.89736	3.68591	2.99363	0.931939
ENSG00000114023	26355	FAM162A	family with sequence similarity 162 member A		21.6628	14.5569	16.3176	8.64962	8.10812	91.6433	39.9095	45.521	65.9627	57.767	53.0782	53.4704	17.4525	16.4763	17.1969	15.5021	12.124	12.3444		29.7835	65.9268	78.2691	69.1168	81.8356	90.9259	0.931939
ENSG00000256422	102723895	LINC02552	long intergenic non-protein coding RNA 2552		0	0	0	0	0	0	0	0	0	0	1.26979	2.11259	0	0	0	0	0	0		0	0	0.496226	0.918837	1.23223	3.17103	0.931895
ENSG00000089639	51291	GMIP	GEM interacting protein		36.4529	55.2422	49.9684	73.1683	63.8958	50.574	15.886	13.155	8.63049	6.68091	7.2991	7.40537	26.6744	62.7237	56.9345	48.3585	77.1413	58.143		35.5128	12.5796	10.9632	6.39942	6.55239	7.30689	0.931892
ENSG00000139372	6996	TDG	thymine DNA glycosylase		33.6713	49.5184	49.6677	35.1525	42.429	21.8757	18.113	11.6075	6.35028	7.81497	8.29033	7.89227	57.3369	51.5522	47.5851	53.7015	55.3179	50.9248		35.5936	17.1123	14.2465	14.7569	14.3212	12.9468	0.931757
ENSG00000130726	10155	TRIM28	tripartite motif containing 28		974.177	638.347	685.764	653.394	447.271	399.077	186.889	213.85	154.269	115.046	153.876	140.298	654.272	508.563	557.934	426.607	462.847	353.391		235.121	161.172	166.559	167.139	131.894	116.18	0.931708
ENSG00000187715	166348	KBTBD12	kelch repeat and BTB domain containing 12		0.405574	0.507087	0.491243	1.37772	1.11551	1.96127	2.49401	1.43804	2.15538	1.47844	3.09018	4.85282	1.1926	0.521772	0.722269	1.22963	1.11114	1.92786		2.97803	2.42098	1.18332	1.71108	3.79798	6.04898	0.931615
ENSG00000147677	8667	EIF3H	eukaryotic translation initiation factor 3 subunit H		306.088	312.663	399.873	299.362	213.317	164.562	111.193	105.545	95.6592	93.6799	89.5227	86.9169	226.237	237.648	277.439	258.342	261.018	228.238		178.168	131.739	116.486	114.105	117.573	104.367	0.931519
ENSG00000242615	---	---	---		1.66127	0.768221	0.967535	1.40273	1.00112	0.754335	0.411952	0	0.558581	0	0	0	2.91623	2.72471	2.30552	1.78249	2.66364	2.29179		1.34212	0.608127	0.747159	0.523957	0	0.54626	0.9315
ENSG00000177302	7156	TOP3A	DNA topoisomerase III alpha		42.526	36.3313	34.5181	44.0837	32.3013	23.3173	20.7894	16.1769	15.6292	11.6611	16.8165	20.7951	82.3934	50.301	59.5877	52.0901	51.6652	44.7808		35.7488	21.4583	22.3707	18.7824	20.3438	24.6674	0.931462
ENSG00000248905	342184	FMN1	formin 1		0	1.16486	0.636381	0.611272	0.985925	6.11849	8.72663	33.9217	9.36321	24.3287	30.4621	40.2054	1.44341	0.629233	0.757471	0.78894	1.52465	0.935957		9.72861	18.4989	13.3054	11.1039	21.1716	35.3648	0.931437
ENSG00000102882	5595	MAPK3	mitogen-activated protein kinase 3		78.6314	69.2116	74.413	107.288	100.293	209.722	154.429	217.306	210.466	209.492	228.002	242.761	50.9991	67.1248	67.0629	70.4348	71.2506	78.2367		112.557	155.973	214.808	152.733	187.136	256.073	0.931254
ENSG00000139620	54934	KANSL2	KAT8 regulatory NSL complex subunit 2		53.8319	50.2537	58.0887	46.548	41.1377	30.8607	28.2031	26.7058	22.9727	20.0036	18.3117	19.9561	50.894	52.6446	55.589	50.4698	51.4024	48.234		39.2306	29.1059	21.6134	29.5974	26.0248	20.9237	0.93121
ENSG00000127399	65999	LRRC61	leucine rich repeat containing 61		45.4126	54.1735	58.1633	77.256	52.8798	55.5023	25.9292	24.9839	14.4552	11.0724	12.4649	10.5583	28.3182	37.3455	33.6594	35.0831	41.5334	28.6411		24.0388	15.2323	19.1791	7.16554	10.4817	7.40177	0.931115
ENSG00000273391	---	---	---		0.516931	0	0	0	0	0	0.623999	0.67938	0.886748	0.561745	0.681933	0.552218	0.511906	0.603547	0	0	0.40637	0		0.685942	1.01063	1.1157	0.988768	0.804533	0.691213	0.931067
ENSG00000197056	79830	ZMYM1	zinc finger MYM-type containing 1		13.2855	11.6141	10.5712	7.55198	7.44577	4.44219	3.64182	1.64236	1.71813	1.85641	2.72959	2.83578	37.8625	20.7562	16.6251	14.8461	17.0893	17.3312		5.45758	5.33668	2.23699	3.57786	3.02667	3.66834	0.930973
ENSG00000132510	23135	KDM6B	lysine demethylase 6B		67.1294	200.957	158.546	202.86	145.737	97.7785	31.7237	18.3028	15.7988	11.1315	20.2389	15.8017	111.797	148.616	176.473	165.392	249.819	165.558		79.3103	56.5591	20.1536	14.0685	13.2467	20.101	0.930965
ENSG00000188529	10772	SRSF10	serine and arginine rich splicing factor 10		147.589	89.5111	84.5478	65.1422	59.9143	24.6919	35.9918	30.0513	32.944	36.5519	40.7621	37.0547	278.236	207.766	160.685	128.735	127.295	144.488		64.9692	66.8948	40.4334	56.9565	58.8473	53.6873	0.930915
ENSG00000186666	144233	BCDIN3D	BCDIN3 domain containing RNA methyltransferase		4.52913	4.20614	4.51462	3.96034	3.50171	1.52543	2.59055	2.33359	2.52544	1.85122	2.33177	1.98646	7.15834	8.91962	7.64137	7.33674	8.36285	8.0662		3.35237	3.97707	3.14734	3.38695	3.28682	2.82923	0.930853
ENSG00000259319	---	---	---		0	0	0	0	0	0.553179	2.34693	4.72025	3.32176	4.66195	5.871	5.95926	0	0	0	0	0	0		0.753956	3.67114	5.52626	4.22097	5.24678	6.92234	0.93085
ENSG00000068912	27248	ERLEC1	endoplasmic reticulum lectin 1		45.2583	42.092	46.7095	32.244	40.7725	40.1474	60.6675	71.5402	66.4295	80.9603	88.3469	100.106	40.8182	42.4419	41.6432	47.4602	40.368	43.1386		44.0024	65.4141	91.2838	98.2662	121.596	125.765	0.930607
ENSG00000110876	6404	SELPLG	selectin P ligand		1.35889	2.65545	1.87311	1.88886	1.76361	5.85028	7.88648	8.36666	10.7451	13.4342	7.39833	6.68677	1.12897	1.35909	2.07535	3.29334	2.16303	2.73658		7.32453	19.2883	21.2395	21.0961	13.2982	8.29016	0.930607
ENSG00000177732	6666	SOX12	SRY-box 12		193.073	271.611	270.611	325.424	347.127	253.54	88.7833	44.3263	48.0334	19.7072	30.8054	23.5879	124.776	164.693	175.615	177.823	268.363	169.432		117.701	35.8535	42.8747	30.523	26.3029	22.3325	0.930582
ENSG00000100065	29775	CARD10	caspase recruitment domain family member 10		4.55322	40.6816	31.0322	16.1963	12.8285	26.9046	7.38565	3.14347	5.57298	2.09088	4.23736	3.11818	6.22182	3.73087	15.8753	11.8996	3.95764	6.26632		7.81378	3.52899	4.75274	2.7565	2.36314	2.63754	0.930531
ENSG00000160208	23076	RRP1B	ribosomal RNA processing 1B		101.866	131.884	104.952	69.6623	62.1885	29.0167	31.8327	23.9922	15.1908	16.6799	27.5902	25.5866	142.891	85.9902	103.084	93.3069	96.9057	78.7879		39.5374	39.2637	27.9928	27.4358	30.1869	26.4221	0.93042
ENSG00000176410	84277	DNAJC30	DnaJ heat shock protein family (Hsp40) member C30		6.2586	10.7596	11.5382	13.8111	13.24	15.774	16.571	21.9495	32.1482	24.7033	26.7955	24.1331	6.47357	8.52356	7.73151	11.2924	12.9405	11.1184		8.40884	20.4959	32.475	27.2025	31.6962	30.9878	0.930397
ENSG00000178951	51341	ZBTB7A	zinc finger and BTB domain containing 7A		10.3024	12.9576	10.9982	19.0997	16.8	22.9821	33.8279	81.2628	70.4301	80.2478	139.888	130.968	9.8483	15.5941	14.8072	13.9818	19.393	14.7638		23.7338	63.5658	96.6804	81.4741	92.2658	112.457	0.930372
ENSG00000146425	6993	DYNLT1	dynein light chain Tctex-type 1		100.269	84.9706	118.471	107.34	81.9747	67.1358	42.2623	11.7653	33.4508	18.6991	12.4855	11.704	56.6925	101.999	95.3784	95.5307	83.1717	93.1287		59.9034	40.916	25.8336	35.2304	24.2875	19.0074	0.930318
ENSG00000001084	2729	GCLC	glutamate-cysteine ligase catalytic subunit		20.9983	16.0609	16.0455	10.5235	16.6472	19.663	27.2189	40.8476	34.7175	48.0085	45.0048	42.9873	34.8554	24.6114	21.7221	21.688	19.5783	17.8049		34.7949	45.4268	44.7489	81.0051	55.1238	49.2969	0.930292
ENSG00000142197	9980	DOP1B	DOP1 leucine zipper like protein B		44.0653	226.369	210.296	137.874	131.865	26.804	24.5952	28.6245	13.0542	30.5604	31.6727	37.3455	30.3602	41.4081	107.228	110.241	112.227	100.488		41.7425	18.6613	17.3937	17.3739	21.7377	28.658	0.930262
ENSG00000167785	148156	ZNF558	zinc finger protein 558		24.4825	31.6346	27.9665	24.8632	19.6542	11.3821	9.66924	5.59404	9.01475	7.23272	9.54776	6.97587	55.2578	49.2596	58.3267	59.9475	65.2305	56.6628		29.9532	17.3458	10.8766	10.4701	14.6537	12.9479	0.930214
ENSG00000099957	9127	P2RX6	purinergic receptor P2X 6		0	0.506026	0	1.32737	1.15876	3.73815	3.39233	7.52968	6.95044	7.19653	11.495	14.7612	1.21406	0.756444	0.607017	0.421894	0	0		1.95717	5.66885	10.93	15.4176	13.3033	19.7245	0.930142
ENSG00000094916	23468	CBX5	chromobox 5		658.977	510.384	417.216	252.953	316.224	122.722	154.042	208.082	119.435	177.949	185.248	157.479	1026.61	517.42	439.521	402.578	351.538	300.643		181.28	124.562	114.297	116.378	109.723	127.141	0.930141
ENSG00000134996	26578	OSTF1	osteoclast stimulating factor 1		6.53302	9.74291	12.0246	6.43931	9.33386	33.6433	30.5618	39.8894	42.4419	37.5776	43.2677	48.6098	5.28697	5.54037	7.58913	9.22534	9.04493	7.73347		23.6922	31.5261	47.5642	54.931	58.1036	47.3643	0.930129
ENSG00000064601	5476	CTSA	cathepsin A		17.4822	12.2528	11.4994	19.7241	23.7554	74.3439	64.4197	50.9145	61.0895	61.5931	65.3338	66.1849	34.6347	41.5101	30.9168	35.4386	39.1965	35.4583		73.2183	104.801	106.314	96.943	102.726	113.072	0.930128
ENSG00000169925	8019	BRD3	bromodomain containing 3		147.907	285.296	256.255	181.551	167.853	83.2618	64.8618	41.3007	25.8749	38.9471	45.4396	38.7429	186.889	169.906	221.983	221.897	241.58	186.752		111.178	42.9524	60.1717	46.4027	40.6256	41.9646	0.930108
ENSG00000102316	10916	MAGED2	MAGE family member D2		483.907	374.105	410.018	383.382	325.975	401.055	241.509	220.968	185.77	151.229	174.798	197.517	381.029	413.74	411.394	429.329	359.352	369.737		278.645	159.93	192.219	197.7	200.128	227.891	0.930081
ENSG00000103423	9093	DNAJA3	DnaJ heat shock protein family (Hsp40) member A3		48.6099	40.6568	43.3727	40.9115	36.3445	50.3728	49.471	65.1099	53.9995	59.4762	63.942	71.0422	48.9306	46.3604	44.7995	41.6947	41.8565	38.9122		46.0654	53.5842	57.1284	55.7877	63.1399	70.2149	0.929985
ENSG00000180354	222166	MTURN	maturin, neural progenitor differentiation regulator homolog		175.774	548.614	563.163	435.679	595.882	564.058	765.602	1508.11	1162.61	2005.89	1709.97	1707.11	62.4713	183.998	246.674	381.082	502.544	442.627		562.283	782.168	1259.48	1633.34	1399.31	1286.88	0.929956
ENSG00000181555	29072	SETD2	SET domain containing 2, histone lysine methyltransferase		83.9182	154.397	150.359	114.597	140.127	55.5358	55.8541	44.4504	34.7114	29.5642	50.0733	52.008	195.414	134.649	176.151	189.97	189.865	176.645		130.507	75.89	62.8381	60.523	64.0461	72.4846	0.929888
ENSG00000196542	165679	SPTSSB	serine palmitoyltransferase small subunit B		0	1.02937	1.12256	1.81414	2.7721	4.40867	7.14111	11.8962	8.07087	14.2997	15.9933	19.2701	1.41834	1.41708	0.939347	3.40268	3.04392	3.4249		6.31516	6.79593	10.7217	13.0311	19.2064	26.2824	0.929878
ENSG00000198189	51170	HSD17B11	hydroxysteroid 17-beta dehydrogenase 11		9.86808	4.7741	7.72863	19.079	23.0242	32.6711	18.275	23.6626	21.8362	33.1034	23.2752	23.1376	11.5145	9.95783	6.69305	10.0578	16.3223	21.5738		19.6484	19.9108	19.2162	31.2911	30.0592	25.1241	0.929859
ENSG00000240489	---	---	---		11.0574	10.54	12.251	8.71479	7.54606	2.43063	3.98206	6.69797	3.37738	2.53104	4.01378	3.42644	6.28173	5.02046	4.82561	4.47998	3.73757	3.0909		2.40735	1.33223	1.22337	0.848615	1.29922	1.24344	0.929833
ENSG00000168781	9677	PPIP5K1	diphosphoinositol pentakisphosphate kinase 1		4.23714	6.2685	5.19987	9.17266	8.59715	9.13583	14.218	43.4559	22.9309	29.479	35.6727	45.9336	18.2251	19.0245	14.0635	16.9656	18.3809	17.5868		18.051	45.0751	47.1314	39.8895	53.5171	58.1804	0.929817
ENSG00000168256	28511	NKIRAS2	NFKB inhibitor interacting Ras like 2		73.5421	105.888	104.068	103.106	88.1849	92.515	65.8225	37.1419	21.7354	19.1866	16.9409	13.3642	61.0394	68.2896	70.9785	85.6705	77.0437	74.0858		85.5907	31.9293	24.5012	19.5786	17.3427	14.3215	0.929752
ENSG00000065534	4638	MYLK	myosin light chain kinase		10.4635	16.0317	15.3334	4.0631	5.48044	39.8792	50.2971	55.6793	54.2688	77.803	76.1455	70.0803	50.7647	5.87224	11.065	12.2029	5.35199	5.12683		20.003	34.1614	48.3777	75.4749	48.4835	57.6214	0.929742
ENSG00000134108	55207	ARL8B	ADP ribosylation factor like GTPase 8B		67.2335	97.1136	106.712	68.181	78.7935	103.679	128.726	204.974	111.175	209.705	219.63	225.092	69.0165	67.7441	66.1963	91.8379	84.5015	84.8587		88.8364	192.309	151.065	174.264	211.426	221.04	0.929717
ENSG00000140280	256586	LYSMD2	LysM domain containing 2		6.28433	12.4035	11.7298	15.304	15.4008	15.9751	28.7417	36.6417	33.0056	34.5892	48.9124	42.2823	1.58038	6.04567	7.39472	8.985	10.25	10.0891		16.3732	32.5268	40.511	27.2278	39.7032	45.5673	0.929605
ENSG00000138279	310	ANXA7	annexin A7		38.9287	21.6404	22.6907	16.3849	20.6597	74.2433	85.5598	89.5413	88.6916	101.263	110.602	115.8	39.0446	30.4311	36.6127	29.7939	31.8579	33.7839		56.1295	84.8087	95.6855	91.4573	111.849	138.2	0.929596
ENSG00000112576	896	CCND3	cyclin D3		32.478	28.6291	28.6833	41.5166	36.2531	69.8179	63.4517	56.3603	80.9419	74.7105	76.2727	77.0297	14.0471	19.9546	29.2202	27.5833	32.4827	28.0196		44.1357	48.1898	67.4431	48.4115	57.5453	72.4188	0.929582
ENSG00000164099	8492	PRSS12	serine protease 12		6.25108	27.7644	36.122	76.3196	102.089	24.2225	13.9321	8.40779	5.40389	3.99354	5.19334	6.46877	2.21224	10.1222	11.6125	32.3587	75.8051	125.415		52.7541	5.73398	8.20576	6.12716	7.00598	10.2041	0.929522
ENSG00000239697	8742	TNFSF12	TNF superfamily member 12		1.24781	1.82658	2.66701	8.09271	10.0996	31.5982	32.7361	24.2878	52.9815	24.7262	33.9181	24.4125	0.84045	2.23652	2.60493	3.8944	9.60738	8.87692		15.4278	28.095	46.007	26.1198	27.7216	27.5512	0.929329
ENSG00000070476	79364	ZXDC	ZXD family zinc finger C		37.7668	43.5645	33.2143	42.1979	31.0349	14.2318	15.3411	9.47467	9.55174	7.98045	14.9614	14.3073	47.6709	39.3997	44.0078	38.7794	38.4875	45.9334		20.5478	16.1762	10.5582	18.6275	17.0411	16.0279	0.929196
ENSG00000120685	80209	PROSER1	proline and serine rich 1		51.9524	69.7405	50.424	41.9096	39.9183	26.5358	21.744	20.6979	16.5791	26.0213	23.6153	28.2184	117.596	79.5927	85.673	84.1696	74.0442	64.7887		37.4652	34.0953	28.4104	32.234	30.4118	29.0675	0.929169
ENSG00000238098	650655	ABCA17P	ATP binding cassette subfamily A member 17, pseudogene		0.403403	1.08852	1.11703	1.69639	1.88589	8.63294	3.33884	3.02607	4.01268	2.43769	2.40359	2.24905	0	0.74913	0.626257	1.22869	3.64359	1.74808		6.73209	6.6633	6.805	5.10387	5.36319	4.85665	0.929162
ENSG00000156427	8817	FGF18	fibroblast growth factor 18		2.00181	10.8344	6.04071	3.3445	1.18295	1.96127	1.01756	0.462962	1.10752	0	1.425	0.67188	4.54482	2.55796	8.61961	6.71301	4.32294	0.866712		3.51013	1.82731	1.13689	1.3583	0.646617	1.09881	0.92915
ENSG00000065154	4942	OAT	ornithine aminotransferase		34.6392	52.4527	54.2754	71.3964	102.075	149.107	213.267	221.495	145.305	177.734	233.712	221.98	29.2158	39.6301	38.498	73.8009	93.2769	100.359		152.031	192.654	194.835	189.796	226.178	229.445	0.929084
ENSG00000147180	7552	ZNF711	zinc finger protein 711		94.3956	139.815	162.498	110.574	133.261	57.9497	49.0105	33.1051	20.3427	26.9727	36.9659	34.041	116.085	180.073	163.966	192.716	198.568	226.559		89.4117	39.3532	37.178	27.1139	34.8734	41.7969	0.92906
ENSG00000115687	23178	PASK	PAS domain containing serine/threonine kinase		32.7226	35.7032	38.2332	34.5697	29.0655	9.50462	5.33056	6.65915	5.46334	5.66588	6.64254	7.36544	71.3802	57.5741	52.6058	43.2504	44.6101	42.0231		21.0307	28.4183	14.7777	13.3167	18.0183	19.5066	0.929023
ENSG00000180881	84698	CAPS2	calcyphosine 2		0.652357	0.659255	0	0	0.466675	0.921965	2.27273	3.41721	4.88878	5.21785	5.26768	7.09991	3.61714	2.8517	1.56406	1.61634	0.587079	2.21758		2.05643	4.12546	6.36384	7.77768	10.966	14.4165	0.928993
ENSG00000144407	5746	PTH2R	parathyroid hormone 2 receptor		0.511667	0.502897	0	0.513059	0.445525	3.63757	1.24816	1.38144	1.57354	4.78571	7.56574	9.83668	0.619564	0.723065	0	0.82218	0	1.64288		1.5097	1.98381	2.0547	1.77944	5.91276	10.3702	0.928979
ENSG00000082068	55100	WDR70	WD repeat domain 70		54.9761	40.6475	49.6955	36.5348	36.6351	23.1497	16.0099	12.9388	15.3595	16.4264	13.9792	16.5568	53.1521	49.684	52.2009	42.0921	43.587	40.0413		27.0238	18.7041	23.1845	26.5708	24.8939	24.236	0.928861
ENSG00000143379	9869	SETDB1	SET domain bifurcated histone lysine methyltransferase 1		56.95	64.8445	74.8071	54.0374	56.0879	26.4688	16.7552	14.2057	12.2241	13.463	12.5338	15.7682	115.233	103.176	103.275	93.3136	104.703	99.5425		65.675	36.5605	28.5993	37.2875	32.2315	34.3846	0.928783
ENSG00000113761	23567	ZNF346	zinc finger protein 346		45.1682	36.617	36.9107	41.4084	35.0557	37.4988	33.383	18.6851	20.0241	14.4314	19.4133	17.8397	39.0672	41.4405	46.0815	41.6093	40.0345	38.6929		33.6297	26.7129	25.3539	19.4356	18.6231	21.0036	0.928709
ENSG00000143924	27436	EML4	EMAP like 4		67.7293	76.1879	77.0208	37.0277	43.9779	28.2792	24.3208	13.8223	11.4448	10.6497	12.1645	14.8111	189.9	79.2882	84.9471	73.5117	67.5042	57.454		53.1868	30.7543	16.4988	19.1521	18.9468	20.4269	0.928684
ENSG00000249014	---	---	---		3.39079	0.796993	0.816503	0.713749	0	0.653757	0	0	0.41062	0.767712	0	0	0	0.410342	0	0	0	0		0	0	0	0	0	0	0.928669
ENSG00000188295	79862	ZNF669	zinc finger protein 669		10.1627	16.3433	14.7763	12.6142	10.6075	3.20173	2.65888	2.89586	2.91946	1.31452	2.48041	2.60594	10.5351	8.48226	13.0929	10.7354	14.8004	12.6411		5.10707	2.69056	1.70948	1.63132	2.07758	2.52759	0.928642
ENSG00000172794	326624	RAB37	RAB37, member RAS oncogene family		0.437868	0.51957	0	0.553606	0.795705	3.13468	8.93676	10.0157	9.71415	17.9489	14.4664	22.2583	0.712018	0.637683	0.725036	0.766127	0	1.31475		4.43071	9.1433	18.1933	15.1073	18.4134	27.459	0.928618
ENSG00000149262	92105	INTS4	integrator complex subunit 4		33.2841	30.3804	35.6187	30.7057	27.0549	19.8977	12.1364	12.7264	9.38875	10.5481	10.385	11.8767	45.4626	32.4795	38.2305	34.0349	36.3485	33.6296		24.4852	15.3826	14.4912	17.9351	17.3561	14.6872	0.928611
ENSG00000100478	11154	AP4S1	adaptor related protein complex 4 subunit sigma 1		5.31558	6.52465	8.46505	10.9833	12.0842	9.40404	13.2657	18.3436	15.1624	13.1893	15.3589	16.3396	7.21249	7.76214	6.44923	11.1758	12.578	11.8924		12.4621	22.6784	18.9614	14.1798	22.2668	22.2636	0.928559
ENSG00000170035	10477	UBE2E3	ubiquitin conjugating enzyme E2 E3		146.527	145.398	159.544	126.993	137.005	98.4491	108.594	83.5878	75.4776	77.2934	83.2308	80.7094	158.032	176.904	139.363	161.153	132.571	143.363		116.467	77.4146	91.0485	98.7849	106.264	100.797	0.928384
ENSG00000182700	492311	IGIP	IgA inducing protein		2.426	3.60938	2.8207	4.17055	6.60197	11.3821	38.116	38.1609	33.046	43.8905	69.5598	60.7564	2.24248	5.87562	5.83626	6.02463	8.70249	11.9471		20.9521	57.8312	56.9555	79.0668	83.5217	86.6395	0.928379
ENSG00000172889	51162	EGFL7	EGF like domain multiple 7		14.8865	17.3069	13.5035	15.0677	14.8361	101.064	62.0294	59.2764	100.742	57.1064	76.2423	67.8364	20.9102	16.8902	19.7687	12.18	13.8744	13.6284		31.3449	53.5026	92.2318	76.1386	75.4139	63.7357	0.928321
ENSG00000153666	---	---	---		0	0	0	0	0	0	0	0	0	0.528433	0.635612	0.795221	0	0	0	0	0	0		0	0	0.456355	1.25193	0.742136	1.7887	0.928317
ENSG00000159147	29980	DONSON	downstream neighbor of SON		21.6437	11.7127	11.437	12.6213	12.7363	9.97398	9.19459	4.92425	5.78165	4.38461	5.58414	6.08785	40.5207	38.5343	29.2732	25.8676	30.0439	26.1851		21.4937	17.2676	12.3349	17.8599	14.7657	11.001	0.928313
ENSG00000137504	58487	CREBZF	CREB/ATF bZIP transcription factor		82.6185	65.0153	59.2149	58.8012	56.5446	39.2757	33.9733	31.5187	28.6644	27.0394	32.9332	36.4843	184.175	164.038	149.258	101.998	126.544	139.789		85.7303	69.9433	52.8771	80.8496	70.1314	64.2183	0.928294
ENSG00000116350	6429	SRSF4	serine and arginine rich splicing factor 4		172.819	109.223	127.358	108.338	111.426	100.293	78.3216	70.8405	47.408	62.102	68.2629	62.9729	174.608	203.621	169.483	134.694	124.939	126.72		116.296	105.006	83.2527	88.4779	91.839	88.4442	0.928282
ENSG00000160233	81543	LRRC3	leucine rich repeat containing 3		7.39333	15.1454	10.1521	11.7038	7.73228	4.94508	1.34612	0	0	0.42101	0	0	9.87173	7.7667	12.1593	13.4493	17.4882	11.7074		4.52235	0.608315	0.43237	0	0	0	0.928
ENSG00000137806	51103	NDUFAF1	NADH:ubiquinone oxidoreductase complex assembly factor 1		14.8353	9.92882	12.8998	12.6713	16.4026	21.4063	25.9069	29.8746	31.9876	30.0751	29.8204	28.0846	12.5374	14.9575	11.3664	13.6138	12.8761	13.6061		19.6332	24.7605	36.3602	31.3492	33.9824	32.5766	0.927981
ENSG00000196591	3066	HDAC2	histone deacetylase 2		629.263	611.311	826.762	392.045	410.821	115.313	67.0327	90.9553	44.9054	55.4296	52.5521	54.351	423.24	510.482	511.757	445.754	452.825	365.069		170.117	97.0692	86.2413	85.6903	86.019	71.8932	0.927975
ENSG00000116711	5321	PLA2G4A	phospholipase A2 group IVA		0.762902	0.732338	0.667339	0	0.621693	2.29653	3.13311	6.79144	7.88768	5.00317	6.31049	5.65066	2.55214	0.511041	1.03436	1.13652	0	1.03101		2.08464	7.75201	4.69979	4.94903	5.73864	4.63554	0.927933
ENSG00000168961	3965	LGALS9	galectin 9		1.17846	1.44806	0.852973	1.87756	1.52065	11.3485	6.57265	5.51894	9.00955	8.01352	4.16698	4.59553	1.34599	2.75402	2.62784	2.74991	2.26786	2.70437		13.3088	12.4414	11.5804	15.1202	9.07588	6.60882	0.927921
ENSG00000175766	253314	EIF4E1B	eukaryotic translation initiation factor 4E family member 1B		0	0	0	0	0.495189	1.79364	0.686973	1.57183	1.67781	1.47273	2.81865	3.27322	0	0	0	0	0	0		1.86666	1.81666	5.53931	4.34495	4.83754	8.59535	0.927866
ENSG00000163935	51460	SFMBT1	Scm like with four mbt domains 1		14.3367	18.9922	15.9437	10.9212	9.37127	5.11271	6.2368	7.7473	5.1935	4.88966	6.80798	7.52802	32.7475	19.5137	21.655	20.7755	17.6881	14.3702		11.6537	13.256	7.11925	8.7599	8.10519	7.52068	0.927845
ENSG00000001561	22875	ENPP4	ectonucleotide pyrophosphatase/phosphodiesterase 4		6.88183	13.5327	11.9005	8.51128	12.3903	15.6734	17.2961	33.1728	32.1478	49.7088	49.6165	60.216	8.82011	9.58594	9.39644	13.9791	12.8269	14.5537		15.8464	35.0788	37.4309	81.5573	63.9246	55.4531	0.927838
ENSG00000118007	10274	STAG1	stromal antigen 1		94.2143	86.3897	89.6802	48.209	43.1033	12.0191	16.6261	15.7846	6.54493	9.35066	12.63	11.856	128.175	93.1625	99.8435	102.104	76.844	95.1438		32.1715	25.9776	17.5399	22.1574	20.591	21.7869	0.927818
ENSG00000130643	50632	CALY	calcyon neuron specific vesicular protein		6.04895	17.9875	20.8529	51.2136	66.1737	247.74	141.401	168.925	146.906	91.7192	156.92	173.42	0.530864	17.5055	10.9887	17.775	27.109	17.2247		64.9965	115.578	123.505	70.7778	95.041	142.429	0.927793
ENSG00000197771	79892	MCMBP	minichromosome maintenance complex binding protein		129.813	98.9807	110.187	78.7001	74.0847	47.8248	41.1998	37.3493	25.5608	30.9753	26.3171	23.1297	153.601	96.6213	102.96	103.34	97.0391	92.5661		58.1568	47.039	31.0047	34.536	29.5639	24.4838	0.927791
ENSG00000115137	51277	DNAJC27	DnaJ heat shock protein family (Hsp40) member C27		11.6939	9.57958	9.19296	9.66021	12.6385	12.7566	19.0676	37.9218	13.8444	24.9793	29.2266	33.2067	14.5985	16.8938	14.0087	17.9897	17.8909	17.0458		17.9479	29.4576	22.182	23.7771	28.6492	30.3362	0.927781
ENSG00000107951	55149	MTPAP	mitochondrial poly(A) polymerase		29.1975	28.7037	29.4082	28.7425	25.831	23.6861	20.862	15.0937	11.3637	11.2791	18.4171	14.6215	36.6163	27.9162	32.402	26.2562	33.3107	28.3443		17.8971	17.0364	9.89943	14.9358	15.5158	16.6027	0.927729
ENSG00000261193	---	---	---		0	0	0	0	0	0	0	0.442999	1.03064	1.16065	1.21728	1.57097	0	0	0	0	0	0		0	0	0.747994	0.468613	0.462399	1.08051	0.927708
ENSG00000163597	100507246	SNHG16	small nucleolar RNA host gene 16		27.1511	16.6663	17.5264	17.2364	12.3684	6.85606	6.21398	5.24877	4.10761	3.66181	4.26806	4.62957	77.2573	67.7083	68.8705	46.8557	50.6811	42.2589		33.153	25.3384	21.6888	17.1957	18.0764	16.4925	0.927676
ENSG00000113248	56121	PCDHB15	protocadherin beta 15		14.5345	21.4817	19.9342	13.6307	13.6718	11.0133	10.3409	8.29125	3.34289	4.63041	4.56428	4.17297	10.8708	16.141	17.5416	21.0625	18.4449	17.7502		11.4642	4.3726	3.18795	3.41159	3.41621	3.20421	0.927662
ENSG00000198015	28977	MRPL42	mitochondrial ribosomal protein L42		40.1058	30.7105	29.2366	15.8827	13.073	10.2757	14.4328	13.7428	11.3691	9.90773	14.4774	12.4542	67.2134	50.7297	44.6047	35.0761	27.4329	28.5486		16.3492	20.4666	17.3827	20.2321	16.9225	14.6834	0.927595
ENSG00000177453	167359	NIM1K	NIM1 serine/threonine protein kinase		10.7865	8.43516	10.8677	8.75956	9.40906	30.3243	20.843	24.0954	21.4662	19.8615	26.7603	22.7394	1.42495	7.30447	9.39522	9.92915	9.17366	8.1744		29.612	36.5323	32.7996	24.5557	25.6328	30.9134	0.927464
ENSG00000226435	348840	ANKRD18DP	ankyrin repeat domain 18D, pseudogene		0	0	0	0	0	0	0.51053	0.887314	1.03038	1.04579	0.751275	0.932707	0	0	0	0	0	0		0.501133	2.05369	1.54247	1.47956	1.83467	2.36461	0.927418
ENSG00000133216	2048	EPHB2	EPH receptor B2		93.9206	116.138	116.155	129.309	118.664	63.5485	35.9657	28.3938	25.4141	15.9856	24.5238	22.6822	169.912	140.167	106.964	131.959	122.324	107.034		68.0179	35.8506	33.5995	34.2541	25.3088	20.3622	0.927326
ENSG00000105750	7639	ZNF85	zinc finger protein 85		11.1388	6.88041	8.19925	5.56187	5.17965	4.10693	2.73762	2.05942	1.46859	2.72723	2.23076	1.59515	19.884	15.1903	12.1784	11.2465	11.2281	12.2592		4.66182	1.94076	2.74056	3.64071	2.38859	2.96455	0.927326
ENSG00000118898	5493	PPL	periplakin		0.446841	1.14749	1.31166	1.75721	1.61633	5.28034	4.57114	25.0979	9.75242	26.1461	46.8321	54.3609	6.47853	1.46908	0.937086	3.68698	0.88698	0.502932		5.17309	6.7999	12.6261	13.0541	29.1705	48.8441	0.927324
ENSG00000268912	---	---	---		2.22748	4.71182	4.42232	5.49896	4.349	1.79364	1.52731	1.55628	1.71669	1.52994	2.19713	2.7703	4.03976	4.53618	4.90543	5.27344	6.63086	5.19816		2.47374	2.92047	2.47618	2.15436	2.61968	4.15413	0.927323
ENSG00000138678	84803	GPAT3	glycerol-3-phosphate acyltransferase 3		0	0	0	0	0	0	0	1.85479	1.36959	2.43192	2.73482	4.20671	0	0	0	0	0	0		0	2.11643	1.80176	2.74597	5.48221	4.21573	0.927176
ENSG00000176076	23630	KCNE5	potassium voltage-gated channel subfamily E regulatory subunit 5		2.03475	0.534628	0	1.40454	2.9121	8.9682	14.834	1.19037	3.97691	1.91416	0.878766	0.808136	2.55912	1.37495	1.18269	1.48281	0	3.13962		8.93646	1.80444	0.738197	1.50745	1.21842	0.750511	0.927171
ENSG00000172348	10231	RCAN2	regulator of calcineurin 2		3.50762	12.5389	13.1291	43.64	60.6614	66.2641	72.6229	233.318	101.069	333.863	330.108	429.026	15.2496	23.2959	4.94861	23.8328	6.03927	18.5775		61.2016	145.444	220.429	238.293	293.069	409.569	0.927118
ENSG00000170681	347273	CAVIN4	caveolae associated protein 4		7.42534	14.3271	14.4957	7.60621	9.69072	1.62601	1.21036	2.02434	0.465305	1.26077	1.43975	1.29639	13.4268	12.177	12.9692	12.8532	8.91923	11.0887		6.10085	2.96248	2.40709	2.94681	2.45381	1.66866	0.927091
ENSG00000115616	6549	SLC9A2	solute carrier family 9 member A2		0	0	0	0.414141	0.468516	0.921965	3.60797	3.76506	3.07442	3.01134	3.18897	2.7246	0	0	0	0	0	0.490434		2.32229	4.42429	3.32091	1.86594	2.23544	2.3118	0.926949
ENSG00000109016	25979	DHRS7B	dehydrogenase/reductase 7B		9.5798	6.96676	8.78664	8.77991	10.1455	18.6907	18.87	20.2386	21.8006	21.0368	19.8861	19.0606	9.85093	9.01874	9.21958	8.73392	6.32194	8.65244		15.2336	22.0248	26.12	24.4257	28.3855	25.9465	0.926921
ENSG00000165671	64324	NSD1	nuclear receptor binding SET domain protein 1		151.36	185.62	157.07	145.251	141.163	68.2086	73.0478	64.1307	44.8535	42.282	74.4469	73.1449	286.756	147.493	183.94	190.789	193.641	178.229		119.2	82.4926	54.6848	54.2435	56.2283	66.8246	0.92692
ENSG00000164122	140458	ASB5	ankyrin repeat and SOCS box containing 5		0	0	0	0	0	0	0.535078	1.28182	0.553939	1.29326	1.36232	1.07313	0	0	0	0	0	0		0.662715	1.55266	0.57152	0.732497	1.07748	1.22969	0.926901
ENSG00000015475	637	BID	BH3 interacting domain death agonist		48.3958	67.2196	83.71	80.3543	74.3966	88.1566	90.0736	79.9455	90.7821	53.3899	59.9529	52.8854	21.3416	28.1183	37.2376	48.1762	51.5707	48.9296		68.9401	51.1145	53.5097	30.9412	40.6773	30.5006	0.926823
ENSG00000162599	4774	NFIA	nuclear factor I A		458.668	804.671	558.28	191.4	217.344	100.528	95.3829	39.8056	89.842	54.005	85.9223	50.1821	16.7854	146.267	545.522	271.974	183.881	179.874		74.0874	59.2386	43.7563	59.8283	47.3047	41.9863	0.926783
ENSG00000162621	105378803	LRRC53	leucine rich repeat containing 53		0	0	0	0	0	0	0.662079	4.39475	0.686393	1.45388	0.78994	1.37447	0	0	0	0	0	0		0	4.00034	1.68792	0.717942	1.16592	1.74861	0.926587
ENSG00000126773	64430	PCNX4	pecanex 4		110.006	98.8866	93.0194	55.4437	61.7027	47.2549	39.0982	30.5814	17.3445	30.6258	29.0617	25.9799	149.219	105.069	111.681	116.129	93.3766	93.737		60.5712	43.1124	23.177	26.2385	30.4888	31.5394	0.926579
ENSG00000143207	64326	COP1	COP1 E3 ubiquitin ligase		82.8396	89.047	104.081	67.7503	71.0147	42.93	41.5112	46.8802	29.0123	31.0145	32.7771	31.3346	66.1769	70.0848	77.3512	72.76	75.36	60.6766		44.0671	45.5022	44.2054	34.5149	37.6311	37.5266	0.926578
ENSG00000131944	91442	FAAP24	FA core complex associated protein 24		2.85886	2.03558	1.98674	2.72017	2.76226	2.09537	0.801263	0.610064	0.847749	0	0.617096	0.418296	3.48893	2.31726	2.28084	2.41328	2.80736	2.5635		1.30306	0.41082	0.724873	0.903762	0.556367	0.691461	0.926564
ENSG00000148337	25792	CIZ1	CDKN1A interacting zinc finger protein 1		125.724	144.041	143.305	194.484	160.104	135.663	83.546	75.9131	88.8341	59.7911	97.7595	105.902	138.909	139.095	163.621	155.098	173.159	147.543		120.853	91.5641	97.0324	96.1904	102.49	121.873	0.926526
ENSG00000085831	22996	TTC39A	tetratricopeptide repeat domain 39A		0	0	0	0.744877	0.889625	3.16821	1.7656	2.97422	1.49505	2.93686	4.05869	6.05107	0.48483	0.580093	0	1.52052	0	0		1.99885	5.36372	3.14463	3.3894	4.5249	7.70086	0.926497
ENSG00000176024	79898	ZNF613	zinc finger protein 613		7.34262	7.98462	8.86412	8.00526	7.73738	2.79942	4.49722	5.58854	4.21302	3.42998	3.48935	3.01126	8.66633	8.95865	11.0789	9.70828	11.2692	9.09211		5.59711	7.14281	3.75877	4.79229	5.54661	5.21845	0.926486
ENSG00000063180	770	CA11	carbonic anhydrase 11		11.6056	20.1367	27.0113	23.7571	33.5172	140.155	324.092	544.323	686.176	578.022	608.215	490.415	15.6722	34.5205	24.0893	30.6649	37.1229	25.6581		98.9661	480.074	789.409	461.804	686.33	748.161	0.926469
ENSG00000174231	10594	PRPF8	pre-mRNA processing factor 8		513.472	678.016	647.506	504.952	444.434	259.374	192.875	285.074	144.469	232.481	276.747	335.428	763.594	435.526	572.845	573.394	526.523	464.558		324.885	231.285	207.103	194.656	219.433	293.069	0.926415
ENSG00000125944	10236	HNRNPR	heterogeneous nuclear ribonucleoprotein R		456.762	338.617	369.864	227.45	260.554	126.678	109.869	94.0172	74.16	82.283	101.476	95.9175	533.915	402.153	403.852	337.882	344.108	327.755		230.417	152.247	124.696	124.164	140.312	138.307	0.926323
ENSG00000197444	55753	OGDHL	oxoglutarate dehydrogenase like		1.17712	4.10338	3.83923	5.91667	7.46246	22.3786	34.0278	83.9274	53.7245	82.0499	103.818	129	6.45341	12.6728	7.78634	15.679	8.22198	9.62551		17.9072	52.7198	63.3139	46.6229	76.7788	132.979	0.926299
ENSG00000116128	607	BCL9	BCL9 transcription coactivator		113.443	205.779	174.703	139.697	129.317	74.4109	34.5445	28.6688	20.9834	23.9687	34.6505	30.2725	161.163	131.087	189.089	185.219	208.263	166.654		101.423	44.9379	27.8482	25.0941	24.8624	34.0642	0.926243
ENSG00000005339	1387	CREBBP	CREB binding protein		122.458	276.571	216.116	228.157	210.074	110.15	101.798	69.5465	61.7383	70.7567	103.919	94.1584	259.045	167.175	227.68	240.218	263.146	230.21		131.846	82.6155	77.2788	62.1138	68.8452	75.5757	0.926227
ENSG00000151849	55835	CENPJ	centromere protein J		25.9581	14.8278	15.2482	18.7197	17.4032	7.99595	8.68487	10.5375	4.59596	3.50187	6.25824	7.37538	91.0129	75.0402	50.7739	40.7581	43.3398	49.4586		35.3749	19.8204	20.8525	20.266	21.6196	18.7965	0.926164
ENSG00000170190	9121	SLC16A5	solute carrier family 16 member 5		1.2319	1.84296	1.37409	1.43907	1.53943	3.23526	0.770204	0	0	0	0	0	3.99561	1.55812	2.27755	1.92195	1.88744	2.00858		1.86282	1.01387	0	0.554682	0.4626	0.412472	0.926055
ENSG00000106351	3268	AGFG2	ArfGAP with FG repeats 2		6.39382	4.15808	3.22232	5.62149	4.27699	13.1925	16.8995	16.9323	25.1964	19.7234	30.1621	26.6527	7.47357	7.58255	6.53002	7.98653	5.11224	5.92581		11.6343	18.8669	23.0777	18.8086	20.1261	27.5036	0.92604
ENSG00000234160	---	---	---		1.69572	1.84796	1.4647	2.18056	1.81725	1.55896	0.573343	0	0	0	0.464777	0.77135	2.6479	2.76221	3.20012	2.89746	3.58432	2.77708		2.41567	1.16369	0.571745	0.862435	0.922267	1.20508	0.925932
ENSG00000135116	8739	HRK	harakiri, BCL2 interacting protein		0.513962	0	0	0.579999	0	6.08497	11.3688	21.1133	16.9651	23.889	26.4423	21.5217	1.19184	3.39835	1.21572	2.25626	0	0.589883		8.13772	13.3294	20.0818	15.37	23.5197	24.9694	0.925876
ENSG00000182628	348235	SKA2	spindle and kinetochore associated complex subunit 2		118.33	94.152	100.946	42.0267	44.2391	17.685	34.1355	18.1911	24.8767	18.7384	26.6763	20.249	102.859	98.9027	98.1927	84.222	65.4476	73.7903		34.3757	23.461	30.4264	27.5145	27.5077	27.1303	0.925796
ENSG00000114383	11334	TUSC2	tumor suppressor 2, mitochondrial calcium regulator		32.0353	34.9736	35.3146	51.6992	44.7074	52.7531	73.0442	107.537	110.837	96.6545	98.4051	90.285	22.5879	35.9491	29.7707	40.4748	38.5025	41.2492		56.0338	85.602	120.946	82.6384	107.312	107.848	0.925773
ENSG00000147526	6867	TACC1	transforming acidic coiled-coil containing protein 1		24.6733	30.954	23.5723	18.2648	23.6258	79.2387	140.411	187.871	108.776	197.966	254.843	236.576	35.8348	37.9553	44.6254	41.9437	21.8534	43.911		102.636	149.93	158.275	144.917	173.136	235.503	0.925592
ENSG00000180155	66004	LYNX1	Ly6/neurotoxin 1		6.04307	9.44157	8.02114	19.6262	25.6867	81.1497	185.175	333.602	229.736	268.066	464.964	500.896	6.65281	7.61055	9.01062	18.83	15.8031	16.9881		52.7829	152.954	272.209	230.329	300.919	387.763	0.925479
ENSG00000179144	168537	GIMAP7	GTPase, IMAP family member 7		1.13104	1.08875	0.609371	1.26902	0.766197	3.30231	3.31901	3.3839	7.83469	3.17365	3.54407	4.24083	0.574022	0.816306	1.30459	0.851231	0.823401	2.05304		3.42531	3.65574	8.61399	5.72801	6.1735	5.17144	0.925443
ENSG00000127252	57110	PLAAT1	phospholipase A and acyltransferase 1		1.58867	2.35958	2.65847	3.47266	3.8572	2.86647	7.35415	8.49854	11.4806	7.44618	7.26621	5.86417	2.20293	2.42964	1.91493	3.68338	2.72629	3.47766		5.01837	6.52876	10.9453	7.9585	7.56949	7.12182	0.925416
ENSG00000136682	150472	CBWD2	COBW domain containing 2		12.7454	10.1294	11.3072	10.1702	9.05416	4.27456	5.75224	7.02218	4.26702	4.52992	5.49055	6.10876	17.5445	17.7397	16.5326	14.2216	15.9055	14.0103		12.1888	13.0889	9.67977	7.59366	10.2258	10.382	0.925167
ENSG00000117245	57576	KIF17	kinesin family member 17		2.84919	1.28843	1.41243	3.31998	9.34655	71.6283	25.1384	37.1216	29.5468	32.0839	33.8188	46.1459	7.2612	5.24169	1.70159	2.67965	1.93459	4.07332		20.5101	20.8223	28.0557	15.1923	32.4595	42.0051	0.92516
ENSG00000184465	253769	WDR27	WD repeat domain 27		22.8791	20.0052	16.7852	28.2589	19.8922	15.3381	10.3228	7.10342	6.38697	4.67546	7.42138	10.4179	89.2147	68.059	55.2189	55.1339	56.3849	54.176		25.4625	16.8117	14.3593	19.7614	19.3565	19.7741	0.925151
ENSG00000197024	57541	ZNF398	zinc finger protein 398		31.3448	55.6296	55.3048	49.1418	50.4832	17.115	16.6975	13.9618	11.0191	13.2494	18.3559	20.2893	28.2486	28.8868	38.4978	42.2501	55.4121	46.3243		22.5165	14.9725	12.8405	11.0366	13.7016	17.494	0.925133
ENSG00000154035	---	---	---		22.6518	44.6868	31.0934	30.3035	21.7521	26.9381	18.1583	16.7377	12.721	11.6228	13.4084	11.4157	29.439	27.9636	38.6752	35.4055	35.8748	29.3307		22.4643	21.7836	15.8241	11.7389	11.3524	11.4214	0.925069
ENSG00000143815	3930	LBR	lamin B receptor		157.72	76.9044	57.4226	49.2303	49.0272	16.9139	15.4003	6.0845	14.7899	9.86434	11.7629	10.7209	273.095	157.397	124.376	91.8151	87.1555	105.74		32.9289	21.9418	17.2722	24.8825	16.8741	13.4581	0.925032
ENSG00000204525	3107	HLA-C	major histocompatibility complex, class I, C		38.339	17.5412	25.2885	11.434	17.1172	298.7	105.246	130.751	177.584	112.967	104.12	101.258	18.9511	7.23476	28.8688	10.0654	14.08	21.0951		108.88	151.091	125.837	86.3585	84.7578	78.5807	0.924946
ENSG00000239306	10432	RBM14	RNA binding motif protein 14		99.1999	86.7481	72.8221	91.8838	58.9436	66.9011	40.7581	32.4353	43.7317	26.5048	39.0413	39.154	130.071	103.354	97.1689	92.3244	116.981	87.9946		60.7524	59.7421	47.1962	48.6678	44.0653	41.2704	0.92494
ENSG00000108651	55813	UTP6	UTP6 small subunit processome component		44.1627	34.8996	41.462	39.3208	37.2705	21.2387	22.707	21.9966	21.1531	16.2269	16.9493	16.7078	64.2638	73.1087	63.034	56.4688	65.3792	64.6144		49.6771	41.7766	35.1577	42.1592	40.2776	36.2719	0.924895
ENSG00000125821	92675	DTD1	D-aminoacyl-tRNA deacylase 1		140.201	98.9249	145.051	145.719	135.511	83.8653	53.7699	43.7403	44.6223	43.5979	40.8931	46.3627	62.0753	97.9225	87.5569	97.7278	91.7386	95.0764		69.9875	35.6599	52.6168	59.8211	59.6636	56.3453	0.924842
ENSG00000105650	5143	PDE4C	phosphodiesterase 4C		0	0	0	0.827821	1.20893	5.21329	5.19684	7.42926	3.64516	4.09604	5.57092	5.50037	0	0.824989	0.461177	1.5449	1.338	1.99556		14.2437	26.0675	19.6077	10.6729	12.3127	17.3566	0.924826
ENSG00000073584	6605	SMARCE1	SWI/SNF related, matrix associated, actin dependent regulator of chromatin, subfamily e, member 1		93.5942	96.0651	97.3153	62.4899	64.3085	37.3647	39.7363	32.8312	34.7899	25.6455	29.6239	26.6372	158.051	138.734	97.211	103.557	84.9867	93.1333		43.0157	39.9445	39.3152	50.53	42.8477	33.8353	0.924686
ENSG00000135829	1660	DHX9	DExH-box helicase 9		568.941	452.437	494.141	308.075	303.829	132.511	122.611	177.105	79.9509	107.545	132.096	141.881	632.967	395.069	458.872	442.765	377.351	343.563		200.353	143.737	118.114	120.389	130.059	149.936	0.924666
ENSG00000152137	26353	HSPB8	heat shock protein family B (small) member 8		0	0	0	0.817954	0.50252	17.5509	16.839	30.8456	81.3378	115.968	128.944	112.408	0.804383	0	0	1.30502	0	0		20.2943	42.7272	78.2446	69.8812	85.5184	133.249	0.924617
ENSG00000120948	23435	TARDBP	TAR DNA binding protein		292.194	188.492	210.921	139.563	170.374	78.6352	105.124	104.461	86.8336	104.426	112.143	114.527	358.977	278.472	245.553	220.523	205.216	220.26		173.268	191.936	139.851	182.685	178.274	160.412	0.924607
ENSG00000130559	157922	CAMSAP1	calmodulin regulated spectrin associated protein 1		188.914	399.455	358.201	339.051	363.663	141.932	116.66	124.821	64.1857	74.781	126.669	119.731	235.914	228.331	272.042	338.918	328.961	304.356		186.181	115.375	110.296	81.4788	102.009	111.467	0.924581
ENSG00000272444	---	---	---		0	0	0	0	0	0.653757	0	0	0.686387	0.731606	0.421272	0	0	0	0	0	0	0		0	0	0.994788	0.771495	0.430624	0.40405	0.924506
ENSG00000186470	11118	BTN3A2	butyrophilin subfamily 3 member A2		0.806426	1.02515	0.894377	1.82055	1.43286	10.7116	7.92985	4.64234	6.86191	5.86234	5.18544	5.63567	2.24787	1.91281	1.87379	3.34396	0.857615	3.31717		15.3978	9.73164	8.03564	10.6931	10.6809	8.92935	0.924352
ENSG00000114268	5210	PFKFB4	6-phosphofructo-2-kinase/fructose-2,6-biphosphatase 4		24.8031	34.6579	35.052	36.4804	30.242	43.9693	12.0172	7.86956	11.4342	6.97381	9.43882	7.96684	26.4631	29.8486	29.852	34.0023	41.3502	35.8379		22.7585	15.5144	8.943	13.5702	9.34469	9.45532	0.924177
ENSG00000099783	4670	HNRNPM	heterogeneous nuclear ribonucleoprotein M		502.363	267.424	332.875	304.513	269.727	92.6155	118.806	120.91	118.816	85.4071	124.72	115.374	504.79	389.534	339.236	255.737	252.611	249.095		130.836	134.45	150.59	155.683	141.836	116.442	0.923948
ENSG00000117984	1509	CTSD	cathepsin D		49.8542	62.4832	58.4303	54.6948	50.5011	176.866	162.258	232.482	246.027	208.981	240.483	207.349	53.0401	54.6716	50.7642	54.5788	50.0544	38.125		93.67	155.965	235.843	251.518	205.212	177.312	0.923921
ENSG00000135164	9988	DMTF1	cyclin D binding myb like transcription factor 1		66.22	63.976	64.3993	63.0555	64.3496	38.1693	36.6473	37.6245	28.725	22.5113	32.1117	44.1917	206.871	215.631	184.477	182.47	188.484	193.471		128.403	108.4	72.506	109.003	109.031	101.477	0.923871
ENSG00000067596	1659	DHX8	DEAH-box helicase 8		71.9977	77.331	72.4305	56.4426	48.9592	31.33	27.6475	37.6008	24.8628	24.0809	34.2098	38.7607	90.3184	55.1078	75.9622	67.7187	55.7539	55.9257		39.7483	28.9743	26.9382	27.347	30.0529	37.2513	0.923864
ENSG00000181894	79673	ZNF329	zinc finger protein 329		22.4108	29.0135	28.1231	33.0634	30.2864	16.0757	12.4713	14.1974	10.6939	7.4417	14.4575	20.7378	35.3061	29.7307	35.2126	36.4188	38.7975	28.3616		22.854	16.8665	13.9486	13.2583	17.1295	21.3179	0.923823
ENSG00000196367	8295	TRRAP	transformation/transcription domain associated protein		85.4234	134.89	105.176	116.775	93.1047	38.7728	46.8964	35.0814	26.5679	34.8212	49.7801	53.9379	257.692	108.491	138.41	154.222	144.315	146.994		78.6741	63.0884	40.8663	46.8621	48.0187	59.0796	0.923803
ENSG00000232973	285154	CYP1B1-AS1	CYP1B1 antisense RNA 1		0	0	0	0	0	1.15665	0.631347	0.974504	0.619329	0.767889	0.886398	0.982132	0	0	0	0	0	0		0.742345	0.810383	0.849393	0.744007	1.16616	1.78776	0.923693
ENSG00000102974	10664	CTCF	CCCTC-binding factor		170.58	165.46	183.224	118.861	131.762	59.9277	51.2284	51.4881	44.7615	47.4873	58.9722	59.0256	182.208	133.383	161.346	149.527	159.239	125.486		70.2303	53.5267	60.5259	57.2188	60.3696	55.8639	0.923531
ENSG00000186648	90668	CARMIL3	capping protein regulator and myosin 1 linker 3		29.7272	57.9707	50.7206	67.1531	67.8205	61.0005	33.9316	24.6316	16.6307	12.907	13.4985	12.1633	24.3397	121.173	159.445	127.947	223.288	135.067		101.618	55.9947	40.8599	24.7414	30.2588	24.8143	0.923521
ENSG00000151208	9231	DLG5	discs large MAGUK scaffold protein 5		134.774	167.155	135.444	178.622	112.116	63.5485	59.7099	38.1103	16.3435	25.5992	29.1036	26.8978	312.105	246.339	313.125	295.505	233.738	258.409		185.233	85.4677	55.9092	44.4834	42.1197	52.2307	0.923519
ENSG00000114739	93	ACVR2B	activin A receptor type 2B		234.96	177.059	125.465	99.9278	86.1164	26.5023	23.4606	20.7082	12.5381	11.3473	24.136	18.9839	270.541	156.504	112.635	128.297	101.027	118.964		34.9298	19.7386	12.9207	14.2478	14.8195	18.2337	0.923439
ENSG00000165821	6297	SALL2	spalt like transcription factor 2		146.256	102.368	105.257	101.52	91.0594	84.871	76.0928	35.2353	52.921	46.6202	65.6102	47.1369	368.307	135.393	115.25	124.12	97.1812	101.651		80.8944	42.6039	37.6151	29.7919	30.6616	46.1371	0.923424
ENSG00000164620	285613	RELL2	RELT like 2		2.2193	4.93638	3.52407	3.87759	3.8433	5.58208	9.3875	18.7628	14.1995	12.0603	14.7767	20.9789	4.61863	15.8124	11.6412	15.4372	20.2748	9.19023		17.3293	49.0958	53.1291	50.6557	57.3491	69.0873	0.923398
ENSG00000187094	885	CCK	cholecystokinin		0	2.99039	4.69835	16.2011	16.0957	52.6861	200.673	318.21	356.518	332.503	342.914	301.553	0.858957	1.35357	0.670523	1.485	1.91158	3.67215		65.8278	255.094	352.25	156.24	333.057	312.81	0.923384
ENSG00000184897	8971	H1FX	H1 histone family member X		912.369	389.399	474.761	404.208	321.131	464.687	194.045	143.352	152.389	80.113	113.029	74.4064	355.145	472.278	368.337	202.834	278.28	192.783		134.643	72.0246	101.509	66.2081	61.9481	58.6075	0.923381
ENSG00000196981	54554	WDR5B	WD repeat domain 5B		7.58663	7.70466	8.52902	6.85925	6.53403	2.22948	2.56566	1.31367	2.08738	2.50787	2.08003	2.42065	13.1908	10.5182	11.2211	10.1336	11.8268	12.8951		5.14805	3.76366	2.15777	4.88635	4.2142	3.12014	0.923376
ENSG00000149591	6876	TAGLN	transgelin		7.23005	4.76997	4.10312	3.50582	6.09772	166.339	42.9174	29.0615	46.5116	21.3034	36.6007	40.1929	14.0899	13.8138	20.3427	11.9886	12.2435	10.3025		49.6505	45.9599	86.726	56.6703	71.1075	61.193	0.92324
ENSG00000056487	112885	PHF21B	PHD finger protein 21B		113.571	57.19	38.4467	52.4502	17.2061	6.18554	8.94157	5.19861	5.4182	4.63871	5.52004	2.66178	82.0163	131.37	110.156	53.4876	37.7978	45.8035		21.048	10.5407	8.30813	5.49802	4.95443	5.66521	0.923228
ENSG00000177764	---	---	---		8.1088	2.90972	3.76743	4.02091	2.07154	2.16243	1.83269	1.4641	1.64665	1.88276	1.45431	0.944416	0.649508	1.81305	0.582081	0	0.464916	0		0	0	0	0	0	0	0.923201
ENSG00000161835	160622	GRASP	general receptor for phosphoinositides 1 associated scaffold protein		2.36605	1.92294	1.64774	2.10075	4.0777	41.7231	79.3512	138.224	128.369	76.6581	78.8774	65.1228	5.03163	7.3478	5.79219	3.35634	3.44599	4.38637		20.5726	103.477	114.156	64.4474	75.1319	77.79	0.923164
ENSG00000168826	166793	ZBTB49	zinc finger and BTB domain containing 49		6.60345	11.6978	9.76099	13.5078	11.12	3.83873	3.64979	3.4799	3.50944	3.46088	2.88786	3.87519	10.7932	10.7207	12.0873	13.2316	14.6031	13.268		8.62656	6.0516	3.44356	6.52866	6.21387	5.80046	0.923135
ENSG00000182230	202134	FAM153B	family with sequence similarity 153 member B		0	0	0	0	0	1.52543	3.58864	3.51852	5.00675	2.65748	5.87742	6.70958	0	0.991845	0.761046	1.57552	2.71326	1.19211		12.6193	45.051	31.6724	32.1983	49.7094	64.2779	0.923124
ENSG00000130827	55558	PLXNA3	plexin A3		61.3522	135.114	113.671	179.108	141.798	87.989	41.4075	16.5328	15.5241	12.313	22.6917	26.5212	112.49	209.015	193.257	231.979	291.331	286.804		146.53	46.0406	35.3959	38.5794	37.7324	36.2753	0.923099
ENSG00000182247	7325	UBE2E2	ubiquitin conjugating enzyme E2 E2		10.1425	17.7805	21.8559	15.853	27.8578	55.7034	43.7323	52.1633	47.9693	52.6612	63.1279	58.9483	23.7993	20.0865	13.9113	27.8369	29.1826	21.1775		44.5964	55.3902	74.6557	57.9557	72.876	75.4658	0.922929
ENSG00000181773	2827	GPR3	G protein-coupled receptor 3		0.94836	0.461191	0	1.12034	0.668186	4.5763	6.95131	11.9668	8.80521	9.15018	8.95032	6.89544	1.7361	1.14155	0.972516	1.11548	1.01121	0.859279		2.86086	16.5105	10.6347	8.01065	9.14412	7.07204	0.922885
ENSG00000104133	80208	SPG11	SPG11 vesicle trafficking associated, spatacsin		68.0848	53.4862	53.2596	50.453	55.1688	41.0526	42.6503	32.5413	31.7961	30.5372	38.5224	38.7149	142.281	78.6066	66.515	82.1515	67.7335	74.4746		54.0208	43.0974	33.9848	37.2193	38.2381	40.9596	0.922766
ENSG00000160191	5152	PDE9A	phosphodiesterase 9A		52.5334	46.1108	49.7073	60.989	40.2011	39.8121	31.8129	12.765	21.729	12.1424	11.8321	8.23315	31.5883	62.0163	71.9018	52.1983	72.4643	63.008		54.5974	31.6991	20.8871	20.1874	14.5489	12.3898	0.922597
ENSG00000171793	1503	CTPS1	CTP synthase 1		75.1443	39.771	48.5121	43.3555	38.1843	11.9185	24.0776	28.6993	14.8507	19.2047	22.7049	27.5707	137.873	79.3054	65.8177	57.1124	58.0998	40.2833		30.7708	39.0729	32.1235	31.4114	33.3926	35.5224	0.922594
ENSG00000101191	11083	DIDO1	death inducer-obliterator 1		83.8495	123.973	104.815	104.208	96.6124	46.8526	45.946	37.6125	37.9484	26.2288	47.9186	45.4795	147.668	139.326	135.121	131.271	144.373	133.189		93.7868	63.4345	54.9367	66.7364	64.1286	66.2325	0.922577
ENSG00000158545	124245	ZC3H18	zinc finger CCCH-type containing 18		75.0959	67.134	74.7514	68.6272	64.1023	48.5959	36.0547	31.9128	36.4704	30.6875	38.954	35.1823	108.485	84.3988	87.0211	73.6312	82.411	66.0345		55.1706	49.3362	38.0852	44.1489	45.9743	43.8958	0.922567
ENSG00000100982	63935	PCIF1	PDX1 C-terminal inhibiting factor 1		110.272	92.336	88.3749	104.262	72.2974	97.678	53.0124	37.1241	43.5834	29.4568	41.3178	43.3363	67.5384	80.9517	91.1825	73.7594	75.5595	71.6432		51.5354	30.7067	35.5032	43.1049	36.1861	37.3348	0.922567
ENSG00000234336	---	---	---		0	0	0	0	0	0.419075	0.783586	1.15056	0.71978	1.98835	1.3127	3.48238	0	0	0	0	0.536291	0		1.67234	3.20797	4.18796	3.49623	5.87735	9.19929	0.922505
ENSG00000175077	132112	RTP1	receptor transporter protein 1		0.422804	0	0	0.963994	1.31644	0.787861	0.66773	2.90896	2.39316	2.50969	3.40587	4.94027	0	1.44094	0	0.684852	0	0.519698		1.08002	2.41781	3.57152	3.17575	5.83806	7.57741	0.922502
ENSG00000145819	23092	ARHGAP26	Rho GTPase activating protein 26		5.65914	11.9471	9.22913	5.99595	9.29729	18.4896	36.6698	87.0749	39.6311	83.3478	100.052	160.508	14.2128	13.4084	13.4922	22.8978	21.5094	13.0639		44.0503	87.9124	101.917	61.362	109.916	165.568	0.922496
ENSG00000245205	---	---	---		8.06943	10.0676	9.83082	3.69141	3.52478	2.22948	1.60988	2.2559	0.97792	1.13486	1.02685	0.5542	1.5593	1.20048	1.88449	1.69785	1.00709	1.13347		0.58582	0	0	0	0	0	0.922477
ENSG00000132394	60678	EEFSEC	eukaryotic elongation factor, selenocysteine-tRNA specific		33.6693	32.8025	38.2282	44.5434	33.2696	38.2699	20.464	17.9384	23.3163	14.0798	20.244	17.7197	24.2265	29.0241	28.4586	24.6083	29.3669	25.4572		18.1262	15.8169	18.239	15.7791	15.3472	15.7128	0.922425
ENSG00000100362	5816	PVALB	parvalbumin		0	0	0	0	0	0	3.37197	19.8081	37.225	42.7476	36.0937	26.4462	0	0	0	0	0	0		0.679114	4.03809	21.4637	49.8134	34.6398	27.6635	0.922424
ENSG00000196357	147929	ZNF565	zinc finger protein 565		5.7361	7.03993	7.57773	8.92723	6.97694	5.04566	3.2173	3.58592	4.24312	3.22292	4.28879	4.18965	7.25529	7.14762	9.13014	9.48173	12.0833	10.0204		6.41285	5.94118	3.96949	4.98042	5.48852	6.23269	0.922404
ENSG00000083535	10464	PIBF1	progesterone immunomodulatory binding factor 1		30.0951	23.8901	26.3818	13.4492	16.062	11.2815	8.85208	8.11143	8.19806	5.0774	7.21981	6.89853	41.1146	27.4304	30.5161	28.7594	21.5626	23.9606		15.8827	13.9817	8.26959	11.2129	10.44	11.1306	0.922391
ENSG00000187742	79048	SECISBP2	SECIS binding protein 2		97.4251	95.7554	93.4081	70.8195	60.9728	37.3312	37.1831	43.0974	29.3831	27.6472	36.2563	43.5879	139.576	139.516	152.895	112.616	124.166	117.8		62.4908	55.9366	59.8551	65.6235	62.1856	65.9391	0.922366
ENSG00000206503	3105	HLA-A	major histocompatibility complex, class I, A		47.3316	27.5626	37.0031	24.9546	40.4135	241.203	125.016	130.066	200.936	88.6424	103.869	78.7393	55.8021	40.4285	55.4337	40.0432	29.1504	47.7286		154.535	193.66	180.677	114.357	99.0828	95.3054	0.922207
ENSG00000136295	80727	TTYH3	tweety family member 3		633.384	617.73	459.322	700.151	520.34	617.565	435.004	296.643	216.482	174.579	301.767	206.739	349.388	459.926	520.09	491.896	498.11	430.492		342.805	227.164	237.781	128.153	141.098	131.516	0.922197
ENSG00000183597	128989	TANGO2	transport and golgi organization 2 homolog		5.87576	5.81301	5.75276	9.65235	7.93067	11.7844	15.9772	17.488	21.6525	16.7768	20.4543	26.1397	10.7896	11.646	13.7246	16.3631	17.0637	14.6563		18.9338	23.9525	32.6126	33.2072	40.1032	46.3883	0.922146
ENSG00000189159	51155	JPT1	Jupiter microtubule associated homolog 1		558.719	759.123	971.862	827.553	762.932	571.065	213.233	148.624	101.839	96.129	97.1591	74.4686	231.978	586.149	525.575	631.91	625.311	554.901		442.587	174.574	159.591	78.6774	109.03	97.9944	0.922021
ENSG00000130803	57693	ZNF317	zinc finger protein 317		47.7994	68.0464	65.6658	56.2818	51.8604	32.4364	27.4858	31.4832	17.0806	21.7486	26.3031	26.0098	43.9482	39.3083	55.4361	53.2166	61.0823	51.38		37.8399	28.2575	25.8992	25.5705	26.7536	27.5869	0.922003
ENSG00000166341	8642	DCHS1	dachsous cadherin-related 1		140.429	329.153	216.526	327.925	197.403	107.769	63.0689	33.1218	25.1296	20.4091	27.0985	19.6317	253.2	270.628	368.161	422.768	411.226	405.479		160.588	53.5595	31.5579	27.2044	21.9604	28.0404	0.921999
ENSG00000011258	54799	MBTD1	mbt domain containing 1		79.1486	103.636	89.6243	50.047	54.6263	17.4503	12.9104	8.29445	8.04268	9.51625	9.71893	10.2449	143.18	100.163	99.7933	90.5666	90.0137	99.0359		36.4023	21.6434	13.3723	23.1117	20.7439	18.373	0.921917
ENSG00000163026	80304	WDCP	WD repeat and coiled coil containing		39.7718	44.4998	40.2918	28.9456	26.3113	14.0977	10.1175	11.5292	6.86783	7.41984	9.07887	9.0729	36.2015	28.6364	35.2153	34.0502	36.4166	30.4591		16.7196	12.3557	9.89704	7.63351	10.7118	9.70972	0.921893
ENSG00000268119	---	---	---		2.29843	1.70916	1.18363	0.980376	0.966774	0.519653	0.762976	0	0.619325	0	0.435454	0	10.218	3.803	3.96629	2.22581	1.40898	2.39577		0.450482	0	0	0	0	0	0.921884
ENSG00000187953	441194	PMS2CL	PMS2 C-terminal like pseudogene		5.86116	7.46175	6.02949	10.9992	6.62386	5.98439	3.20262	3.6874	1.8527	2.38203	3.01862	3.03384	12.2083	14.3796	13.3709	11.4283	16.4341	12.0465		7.26223	4.98214	4.00044	2.15178	3.65639	4.75732	0.921853
ENSG00000143196	1805	DPT	dermatopontin		0	0	0	0	0	0	0	0	0.514042	0.708812	0.563014	0.612802	0	0	0	0	0	0		0	0.667649	0.826729	1.26354	0.874738	1.22442	0.921685
ENSG00000054219	4065	LY75	lymphocyte antigen 75		0	0	0	0	0	0	0	0.510133	0.944298	0.83861	0.454549	0.622758	0	0	0	0.467253	0	0		0.57473	1.14089	1.43001	1.55607	1.05577	0.869206	0.921617
ENSG00000101367	22919	MAPRE1	microtubule associated protein RP/EB family member 1		319.648	240.273	259.433	160.753	156.665	116.821	120.041	66.9429	69.6511	66.9868	68.5059	44.4023	237.81	200.26	217.153	219.751	177.343	170.369		135.67	82.5951	59.4464	65.6209	50.5158	45.2657	0.921589
ENSG00000130513	9518	GDF15	growth differentiation factor 15		0.447524	0.525351	0	0	0	4.84451	0.581322	0	0	0	0	0	0.478354	0.727316	0.570819	0	0	0		1.52013	0	0	0	0	0	0.921577
ENSG00000173705	26032	SUSD5	sushi domain containing 5		0.586627	0.485225	0.636501	1.3879	3.45254	6.62138	16.656	19.2901	14.1037	24.3068	24.699	27.6182	2.93398	0.947323	0	1.27776	0.811027	2.25586		9.02448	15.1271	18.8256	13.8195	17.3231	25.3531	0.921549
ENSG00000249362	---	---	---		1.07256	1.06883	1.00482	0.413557	0.704341	0	0	0	0	0	0	0	0	1.73732	1.63163	1.18879	1.16446	0.807984		0.606932	0	0	0	0	0	0.921547
ENSG00000226762	---	---	---		0	0	0	0	0	0	0.924936	2.86181	1.36555	0.444278	0.613032	0.633406	0	0	0	0	0	0		0.62007	4.68511	2.89899	1.77269	2.30862	1.50758	0.921537
ENSG00000157800	84255	SLC37A3	solute carrier family 37 member 3		33.1072	66.7367	63.9887	60.1921	63.2473	20.7023	26.1192	23.1305	17.4284	21.6491	26.0782	25.8892	51.265	60.6088	66.8044	73.9854	81.2602	88.8253		46.4412	40.1046	31.5999	28.8639	35.349	38.7082	0.921527
ENSG00000205581	3150	HMGN1	high mobility group nucleosome binding domain 1		278.525	92.0466	109.782	148.033	117.756	43.3994	44.5693	20.985	32.6108	19.7706	19.1329	22.1466	424.823	518.447	378.132	297.039	363.626	383.82		145.782	107.853	63.6696	81.4911	80.0437	68.2068	0.921523
ENSG00000204592	3133	HLA-E	major histocompatibility complex, class I, E		21.1496	20.1534	16.0544	14.9204	19.1474	231.346	111.7	92.7903	162.04	82.5885	115.171	85.9111	17.837	13.8304	22.1229	20.8087	12.4366	25.6495		135.568	117.919	121.663	80.756	82.5262	88.4464	0.921505
ENSG00000172782	283985	FADS6	fatty acid desaturase 6		0	0	0	0	0	2.22948	1.47927	6.23655	2.69827	4.70383	5.58192	9.21496	0	0	0	0	0	0		2.57481	3.85767	4.70963	2.50743	4.8881	8.06251	0.921489
ENSG00000186665	284018	C17orf58	chromosome 17 open reading frame 58		21.9471	25.4614	31.9178	28.3432	35.2062	36.3589	33.1528	10.7854	15.4406	10.733	13.157	10.7945	12.4966	18.2466	17.5392	23.6554	25.0584	23.5736		27.0784	15.5086	13.9061	12.1852	13.2413	14.8519	0.921476
ENSG00000104691	7993	UBXN8	UBX domain protein 8		4.401	4.04985	4.71799	4.73733	5.33286	9.40404	9.37856	11.3617	7.17975	12.9387	9.15045	9.25037	7.7059	6.71603	5.93908	6.25253	6.94354	7.35486		11.5457	17.338	16.2512	20.9821	17.4681	15.0178	0.921475
ENSG00000173641	27129	HSPB7	heat shock protein family B (small) member 7		0	0	0	0	0	2.33006	1.12519	1.16266	2.38934	2.07343	3.36384	2.69764	0	0.492311	0	0	0	0		0.652724	2.13354	3.55044	2.81972	2.72503	3.20278	0.921443
ENSG00000197037	221785	ZSCAN25	zinc finger and SCAN domain containing 25		16.1517	17.9324	16.1542	16.935	14.1959	10.5104	8.19073	7.45387	6.09288	7.64579	9.39239	7.68689	26.4813	17.5356	18.7528	19.501	19.0106	20.7688		13.4143	9.09613	7.74231	8.8345	8.94729	10.1106	0.921432
ENSG00000103174	51172	NAGPA	N-acetylglucosamine-1-phosphodiester alpha-N-acetylglucosaminidase		5.0034	6.93082	6.68173	13.598	11.3472	12.4549	20.9398	32.8611	30.4083	24.6104	35.7038	37.264	7.67325	10.0493	9.34075	9.25635	16.2589	11.6373		15.6534	35.1079	57.8014	43.2907	56.4822	60.3228	0.921376
ENSG00000204713	5987	TRIM27	tripartite motif containing 27		79.9444	109.45	113.944	113.687	113.83	73.6734	60.8257	53.9671	47.6797	45.1001	52.8748	55.1303	99.7659	98.6444	93.415	94.3461	112.149	96.0292		70.7778	54.1602	53.944	48.1565	48.2341	52.7015	0.921373
ENSG00000118985	22936	ELL2	elongation factor for RNA polymerase II 2		14.8528	15.8134	17.8638	14.6709	21.5745	19.9983	25.7015	105.114	50.1215	85.0904	73.4355	71.2482	15.6386	10.4452	16.2303	11.7151	37.0205	22.0149		45.8485	101.426	83.8775	132.006	97.0547	82.0007	0.921372
ENSG00000154734	9510	ADAMTS1	ADAM metallopeptidase with thrombospondin type 1 motif 1		5.49368	2.41951	1.89374	0.774762	2.68993	49.1994	19.1094	21.4187	22.2363	22.5313	33.6911	23.1137	21.6391	6.02016	6.19603	5.34453	2.09244	1.57337		30.9805	19.6349	35.0519	27.0678	30.3959	27.1603	0.92128
ENSG00000248469	100996385	LOC100996385	uncharacterized LOC100996385		0	0	0	0	0	0.687283	1.67123	3.39279	2.76442	4.84762	4.35462	2.89272	0	0	0	0	0	0		1.10865	2.65957	3.06698	3.92035	5.03436	5.01331	0.92125
ENSG00000101126	23394	ADNP	activity dependent neuroprotector homeobox		240.488	370.262	337.612	254.533	280.778	165.836	111.91	91.4599	66.1822	66.3499	106.742	101.402	319.756	278.2	306.466	302.218	346.449	303.277		179.923	101.118	79.231	71.9709	80.3579	90.8577	0.921202
ENSG00000255471	---	---	---		0	0.568738	0.710062	1.76969	1.2766	2.06185	0.785054	1.14842	2.10403	0.644893	1.14656	1.26653	0.453432	0	0.42002	0.796837	1.32681	1.26392		1.04312	1.04142	1.50709	0.816357	0.892844	1.11726	0.921177
ENSG00000043143	23338	JADE2	jade family PHD finger 2		3.05616	10.6781	7.7404	9.33344	7.69134	11.6168	16.7973	63.1922	37.9983	58.7582	84.4033	109.374	0.756144	1.99357	7.26705	7.307	12.0537	9.59216		15.1855	31.0003	59.6623	52.9018	65.0863	82.16	0.921138
ENSG00000149256	26011	TENM4	teneurin transmembrane protein 4		125.286	100.183	82.5427	232.932	169.169	50.8422	35.2932	45.5149	22.0952	30.9923	44.7644	54.1156	225.424	142.006	147.356	175.231	288.383	296.036		106.495	56.7383	46.033	34.5685	42.4343	47.4662	0.921136
ENSG00000187534	---	---	---		2.37245	1.17484	2.25032	1.78107	2.1842	1.82717	2.65898	3.7223	13.4338	5.5185	5.45504	4.49628	0.691641	0	0	0	0	0.40108		0.872502	0.814183	6.64469	0.883545	2.00146	3.65018	0.92112
ENSG00000250462	---	---	---		6.42005	7.96753	6.1389	4.50122	4.96428	3.10115	2.67339	1.96218	2.36389	1.36915	1.65818	1.77601	10.0717	9.37835	12.3979	10.871	9.49512	11.1447		7.70976	4.83418	3.4905	4.51044	3.70991	4.16634	0.921098
ENSG00000166816	197257	LDHD	lactate dehydrogenase D		0	0	0	0.865847	1.19162	18.7578	21.0377	19.489	36.3629	31.2431	34.5638	22.5663	0	0	0.47081	0.614869	0.509854	1.10055		5.09684	10.4907	17.7534	17.2976	18.9257	20.6103	0.921068
ENSG00000223414	---	---	---		0	0	0	0	0	0	0.634298	2.67515	1.34061	1.8756	2.28642	2.21396	0	0	0	0	0	0		0.631134	1.58114	1.83807	1.07067	2.24103	1.90698	0.921029
ENSG00000172687	148203	ZNF738	zinc finger protein 738		20.5574	13.8965	17.0106	11.1953	8.26101	2.59826	3.39706	2.44596	2.93919	2.00727	2.73367	2.59021	85.933	81.6139	52.7573	33.5736	27.6843	34.0323		12.0659	4.1897	6.32519	9.04416	8.43687	6.52403	0.92101
ENSG00000174243	9416	DDX23	DEAD-box helicase 23		150.66	124.441	143.892	126.35	123.841	88.2572	67.4146	73.8169	66.9449	59.7059	69.4506	71.755	161.436	125.12	138.268	127.305	120.871	119.759		95.2358	67.6894	69.8479	65.9862	69.2003	76.539	0.920952
ENSG00000108523	26001	RNF167	ring finger protein 167		76.3266	63.7816	79.0357	76.6721	75.952	147.498	94.3698	105.224	146.35	129.475	113.208	110.311	68.6721	73.2627	73.2972	76.5584	71.5461	69.9258		92.3909	115.96	139.731	159.977	145.098	132.333	0.920946
ENSG00000136450	6426	SRSF1	serine and arginine rich splicing factor 1		459.87	220.84	242.528	152.588	148.866	53.7254	89.4445	115.202	70.0977	89.399	91.4939	80.6204	524.831	364.675	311.198	256.524	230.061	223.725		134.117	152.534	127.711	136.844	137.709	114.941	0.92094
ENSG00000100139	85377	MICALL1	MICAL like 1		32.0987	58.0747	48.3735	84.9217	67.2533	43.6676	29.1252	11.7537	21.9747	6.68637	11.7177	16.1498	48.1049	42.3693	54.3575	48.4859	75.4746	50.9458		31.7649	13.1603	13.1289	28.8356	15.2958	11.0008	0.920771
ENSG00000105643	27106	ARRDC2	arrestin domain containing 2		1.16019	1.09206	0.969471	1.57701	2.89631	16.1092	15.0689	16.8254	27.2855	16.6644	22.2813	21.0479	1.68897	1.87179	2.54741	3.33181	2.58388	3.33683		22.7503	28.4761	50.113	58.0971	49.6248	38.1573	0.920759
ENSG00000160094	149076	ZNF362	zinc finger protein 362		39.4181	79.7743	59.4642	73.735	60.9146	55.0664	31.2707	24.6001	19.6624	20.9574	28.0561	24.585	51.232	41.1034	48.9689	48.4858	64.7063	44.8934		32.8567	16.5682	14.7067	12.1139	13.4413	17.8341	0.920711
ENSG00000099822	610	HCN2	hyperpolarization activated cyclic nucleotide gated potassium and sodium channel 2		3.29381	14.235	14.4532	24.5894	27.3619	76.8583	84.8312	180.847	119.878	119.266	175.509	187.627	0.819609	7.98685	8.0729	16.6356	22.7664	11.126		33.6939	74.161	100.753	91.7725	95.5645	114.833	0.920698
ENSG00000156508	1915	EEF1A1	eukaryotic translation elongation factor 1 alpha 1		9094.53	7438.05	9958.55	5641.98	4200.48	3287.58	2143.7	1339.82	842.296	1604.8	971.637	941.375	7229.56	5509.16	7538.99	6959.1	5649.28	4954.17		3301.91	1509.91	1335.31	1163.51	1186.36	1118.89	0.920689
ENSG00000127663	23030	KDM4B	lysine demethylase 4B		114.739	209.748	189.983	197.741	160.916	167.211	67.335	48.6901	34.7971	27.377	43.8718	35.626	83.2883	104.924	119.387	111.614	178.653	108.154		70.3339	48.3221	39.3602	34.588	29.8822	29.0213	0.920599
ENSG00000174093	---	---	---		4.10626	3.78739	3.41542	5.25617	4.60856	2.06185	2.08374	2.59631	2.29745	1.0155	2.08875	2.66198	25.6138	23.0181	16.127	15.5512	29.1691	25.4314		9.08823	6.73209	3.37711	6.98213	6.62601	7.52097	0.920572
ENSG00000100796	55671	PPP4R3A	protein phosphatase 4 regulatory subunit 3A		108.462	88.8884	78.6842	58.0077	58.6953	30.1231	36.5127	27.8079	24.0319	23.8542	36.1501	34.4902	141.843	122.617	118.588	98.9329	106.147	94.6453		68.9404	67.6407	44.4127	49.9158	51.3853	45.0059	0.920548
ENSG00000175792	8607	RUVBL1	RuvB like AAA ATPase 1		97.0162	64.2808	86.1772	61.2915	52.4323	29.8884	26.2822	25.9958	24.2812	20.5364	19.1188	19.3232	84.9949	66.8909	66.0044	49.3979	53.3891	42.384		28.4906	25.4507	23.6783	19.7484	22.1197	22.0003	0.920539
ENSG00000251226	729305	LOC729305	uncharacterized LOC729305		0	0.446425	0.522546	0	0	0	0.714701	0.982402	1.07143	2.27241	4.39658	2.62457	0	0.426442	0	0	0	0		0	0	1.49959	1.91242	3.25914	2.83534	0.920515
ENSG00000103671	9325	TRIP4	thyroid hormone receptor interactor 4		30.8032	27.4497	35.1439	27.0694	25.9779	17.2826	12.9153	10.4215	14.2722	10.6886	11.7179	10.8086	26.3123	33.5432	33.3399	32.585	30.2725	30.2464		24.3143	19.6753	16.5466	21.195	17.5015	15.9533	0.920507
ENSG00000138668	3184	HNRNPD	heterogeneous nuclear ribonucleoprotein D		659.788	312.235	400.745	276.994	307.35	131.539	130.775	124.913	116.824	99.7878	130.183	104.835	720.555	622.118	512.034	338.177	338.305	319.582		218.608	171.688	154.577	164.938	156.526	148.021	0.920498
ENSG00000102984	55565	ZNF821	zinc finger protein 821		55.1185	77.6021	92.9272	99.1132	84.4403	52.3508	31.2178	35.115	27.2673	19.9493	24.0398	21.8441	32.6431	65.0231	67.6521	64.2171	78.1433	65.8981		48.3824	26.8492	27.6342	24.1988	25.8322	27.9111	0.920448
ENSG00000197472	57116	ZNF695	zinc finger protein 695		4.64632	2.09422	2.49912	1.56665	1.69059	0.754335	0	0	0	0	0	0	7.57449	3.60481	2.93182	2.20273	2.63353	2.42767		0.592592	0	0	0	0	0	0.920399
ENSG00000089127	4938	OAS1	2'-5'-oligoadenylate synthetase 1		0.453159	0.630995	0	0.46729	0	1.89422	2.69451	2.48415	5.85692	6.32563	2.41553	3.59575	0	0.405271	0.508381	0.923996	0	0.683154		5.97353	5.49777	7.67008	7.93189	6.15881	5.88612	0.920341
ENSG00000255561	91893	FDXACB1	ferredoxin-fold anticodon binding domain containing 1		2.01001	3.7835	3.79262	3.78124	3.34907	1.86069	1.83103	1.08919	1.70754	1.09428	1.21092	1.20667	3.32155	3.62515	4.3878	4.48501	4.99285	5.02876		1.74567	2.28186	1.93631	2.06279	2.093	1.94718	0.920286
ENSG00000144730	54756	IL17RD	interleukin 17 receptor D		123.014	189.593	166.219	146.963	156.102	103.243	45.464	15.8754	19.3677	11.6324	15.9119	10.8452	247.54	84.2457	157.11	174.951	215.843	204.148		87.2766	24.2162	11.3415	6.53107	8.29855	12.4346	0.920259
ENSG00000152520	255967	PAN3	poly(A) specific ribonuclease subunit PAN3		46.1688	38.7188	32.8269	28.1185	33.5829	17.5844	23.2831	14.9703	17.7815	10.8837	15.934	14.7	91.8815	83.9202	66.7177	52.4914	66.8655	61.4234		35.323	34.0114	24.294	34.198	32.2987	25.1949	0.92024
ENSG00000185730	79943	ZNF696	zinc finger protein 696		7.66691	12.3891	9.58038	13.0162	9.12194	7.12427	5.76484	4.55668	3.66141	4.22661	5.53469	5.10463	7.43464	7.33522	7.48156	6.30708	8.23838	5.5114		3.28372	2.51977	2.53452	1.50151	2.22271	2.32476	0.920124
ENSG00000089234	8315	BRAP	BRCA1 associated protein		40.1462	46.2469	46.9035	33.4474	30.3343	22.4456	20.8107	28.3131	18.2982	18.8669	27.1828	26.4554	40.4776	36.3683	42.2217	40.4349	39.1438	37.6612		26.4071	31.0331	25.2775	27.0271	29.067	30.9473	0.92012
ENSG00000149480	9219	MTA2	metastasis associated 1 family member 2		233.52	166.983	181.949	158.692	126.171	87.5196	54.1166	38.5957	52.8391	33.0913	41.2917	38.4896	214.654	219.551	249.074	167.848	170.891	158.408		106.837	71.1188	64.8495	81.5727	59.5345	58.2321	0.920114
ENSG00000198900	7150	TOP1	DNA topoisomerase I		176.846	159.141	172.563	97.76	105.323	46.2156	58.6849	60.7172	35.8866	33.857	49.907	46.5243	228.626	158.885	186.854	160.338	154.737	128.935		104.007	92.4327	62.9772	48.7081	63.6734	66.4166	0.920049
ENSG00000152240	115106	HAUS1	HAUS augmin like complex subunit 1		69.7098	26.7547	33.9079	18.5117	18.29	13.0248	9.61376	5.16697	8.58732	5.8061	4.6146	3.86147	66.3065	49.6165	39.595	29.2362	23.1241	24.5547		13.6864	7.07593	6.65559	7.70245	7.44735	6.00539	0.919953
ENSG00000165733	9790	BMS1	BMS1 ribosome biogenesis factor		54.9817	43.0258	37.9606	35.9227	37.8056	21.9092	24.7282	30.4232	21.4193	23.7743	29.1038	35.6077	97.9482	61.2874	61.0737	53.7283	47.3211	49.477		40.6192	39.9726	33.1852	42.6939	42.9253	51.6068	0.919787
ENSG00000133135	79589	RNF128	ring finger protein 128		0.862419	0.75053	0.856063	0.533712	0.835919	4.07341	3.13886	5.78082	2.94441	6.96063	6.98114	8.71192	0	0.867684	0.757628	0.962033	0.984881	0.458377		4.97271	8.20857	6.88701	5.41447	9.10454	10.6698	0.919779
ENSG00000169635	23119	HIC2	HIC ZBTB transcriptional repressor 2		19.5167	22.2537	16.5296	35.8073	25.6857	13.7289	7.19897	5.29496	5.76015	3.15676	7.19393	6.66024	98.6296	55.0563	34.5836	31.5486	66.3282	42.7431		28.5461	13.4758	10.0444	9.75705	10.6269	14.0645	0.919751
ENSG00000272294	---	---	---		17.3911	3.92782	4.35979	5.94726	4.37926	1.89422	3.27991	0.813914	1.85517	2.27077	1.38834	0.632002	14.8551	31.9298	13.7601	11.1158	5.34349	12.8527		5.50194	5.0163	1.37842	1.51038	1.28737	1.53996	0.91975
ENSG00000141570	57332	CBX8	chromobox 8		38.7972	23.7409	29.3511	21.9468	17.0482	11.952	10.4671	11.1549	9.06512	6.38505	5.85991	4.08189	31.0122	31.576	31.9342	23.7458	23.1351	18.9833		14.1317	6.83547	8.44089	6.7171	6.82819	4.95525	0.919729
ENSG00000078403	8028	MLLT10	MLLT10 histone lysine methyltransferase DOT1L cofactor		60.3015	42.8357	35.5402	31.6805	30.4765	17.9532	17.1267	11.646	11.634	13.8354	15.1988	14.5853	120.362	71.1334	71.2979	49.9927	60.2475	53.1986		37.0771	34.6789	18.4043	23.3728	27.6685	30.2975	0.919668
ENSG00000169951	92595	ZNF764	zinc finger protein 764		7.10583	12.8164	8.92813	11.046	6.87454	5.41445	5.32938	3.23987	2.86165	1.95731	3.46163	3.3362	10.3644	11.0754	12.2258	10.1767	13.7775	10.9076		5.14854	4.15289	4.88355	3.34267	3.45403	3.5093	0.9196
ENSG00000171606	10782	ZNF274	zinc finger protein 274		23.5534	23.474	23.1071	25.5836	20.244	24.3231	17.5259	12.3749	12.3787	9.41064	10.426	9.94015	36.1397	45.0635	38.1364	33.136	39.1058	37.8278		35.4063	26.421	16.1486	18.1558	15.7304	14.4104	0.919509
ENSG00000204519	90233	ZNF551	zinc finger protein 551		23.0622	31.2877	30.5163	25.0667	22.3483	8.02947	6.79665	4.84537	2.57747	3.88594	3.85724	3.92099	23.7493	12.0949	19.3589	20.2292	26.0758	20.6603		7.94839	4.1079	2.93785	1.86233	2.94988	3.46541	0.919415
ENSG00000137207	25844	YIPF3	Yip1 domain family member 3		130.542	162.519	171.557	156.829	122.772	197.049	120.238	132.975	142.395	120.937	113.04	105.317	94.2031	111.957	127.319	130.017	125.961	111.914		109.279	107.884	108.876	110.599	108.34	101.28	0.919415
ENSG00000106355	23658	LSM5	LSM5 homolog, U6 small nuclear RNA and mRNA degradation associated		43.3965	22.5854	25.4049	19.1643	18.5251	14.8688	14.9928	15.0662	19.6499	12.2646	14.2997	11.0446	64.7959	62.1833	43.0475	35.144	31.8557	34.6473		21.3567	23.6685	24.1196	29.0059	26.5542	22.3482	0.919395
ENSG00000111596	4848	CNOT2	CCR4-NOT transcription complex subunit 2		88.788	110.641	118.746	78.7844	82.1842	48.7635	38.1521	45.1092	36.448	36.6506	38.745	38.2049	122.252	109.32	116.577	107.275	111.783	110.898		68.6781	59.0813	52.0357	59.9312	63.1193	54.4122	0.919379
ENSG00000125485	64794	DDX31	DEAD-box helicase 31		10.7876	14.0368	13.024	15.7213	11.7579	7.05722	6.93713	5.68024	5.95006	4.63251	6.44957	5.51805	24.2678	17.0416	16.768	21.1671	18.6401	18.172		11.6763	9.94681	7.88669	10.1043	10.5659	8.62264	0.919353
ENSG00000231533	---	---	---		0	0	0	0	0	0.419075	0.817915	1.24545	0.72209	2.11818	1.82628	2.48787	0	0	0	0	0	0		0	1.01229	1.22422	2.39656	3.04624	2.49847	0.919261
ENSG00000120875	1846	DUSP4	dual specificity phosphatase 4		103.924	248.446	252.809	150.325	109.276	8.13005	12.4567	29.7216	9.81934	15.5732	11.6609	12.9661	60.9702	72.4474	91.1164	112.795	46.426	74.3997		32.5921	30.7866	17.835	6.3415	14.4214	13.6316	0.919146
ENSG00000146872	11011	TLK2	tousled like kinase 2		65.26	60.6888	65.0316	44.0308	46.8317	25.9994	28.8449	27.7484	21.557	22.1777	31.3684	28.6362	78.0557	62.031	67.4404	58.4084	57.8123	56.4524		44.5378	42.4002	39.2522	36.8566	36.3991	38.1391	0.919071
ENSG00000166037	9702	CEP57	centrosomal protein 57		91.1454	84.7462	100.434	59.4302	74.3347	34.4144	26.0758	24.0394	16.3929	12.5906	19.9994	18.1452	111.49	110.636	92.2292	83.0667	95.2872	90.4		55.5143	31.809	23.296	24.6026	28.832	32.61	0.919008
ENSG00000104774	4125	MAN2B1	mannosidase alpha class 2B member 1		39.6402	32.7794	27.6523	21.7985	16.4678	18.8248	12.8619	9.38654	12.4779	9.13503	6.91308	8.17643	31.386	27.4306	32.2188	23.9422	22.4582	18.2061		15.0556	13.0282	9.32759	15.5698	10.8931	9.13751	0.918978
ENSG00000272447	642361	LOC642361	uncharacterized LOC642361		3.50278	4.06055	3.59221	3.54953	1.9904	2.19595	2.76735	1.59376	2.15854	0.726719	1.1708	0.654303	3.45464	4.1206	3.69311	3.33719	4.06856	3.21002		2.52002	1.43873	1.73951	0.57966	1.27397	1.0163	0.918926
ENSG00000256982	---	---	---		0.904163	1.60255	1.72619	3.24666	4.38839	3.13468	3.86674	7.12772	5.49748	3.50442	3.76686	4.99261	0	0.747009	0.906031	2.47287	4.25962	4.73272		3.8895	6.31446	5.44233	3.83801	5.49229	4.93679	0.918904
ENSG00000057019	131566	DCBLD2	discoidin, CUB and LCCL domain containing 2		61.5966	31.0114	26.1454	26.5261	25.4587	14.2318	17.5928	20.7017	9.44872	16.8709	19.1539	19.0548	213.144	102.749	38.8615	62.5481	29.0193	44.1441		26.2482	21.4732	17.8084	18.9115	17.8682	19.3289	0.918801
ENSG00000159579	89970	RSPRY1	ring finger and SPRY domain containing 1		68.9764	88.2818	86.8775	66.8546	65.6914	36.1578	32.721	27.5818	15.0524	25.2949	29.5627	24.8238	82.1836	76.6077	78.8689	93.0316	92.9774	91.5628		57.4914	34.7302	26.343	26.6527	30.769	29.0824	0.918768
ENSG00000147050	7403	KDM6A	lysine demethylase 6A		39.0873	51.067	43.3794	28.4399	29.0932	12.7566	14.5743	14.8222	8.76202	14.8534	16.4176	18.2634	61.1166	42.8988	58.094	42.0811	41.0594	42.2576		30.017	16.8796	15.7462	17.3656	18.1578	16.7364	0.918747
ENSG00000099998	2687	GGT5	gamma-glutamyltransferase 5		3.83602	4.06277	3.60493	3.27703	5.01876	61.9393	23.8348	12.4638	22.7758	11.4303	16.582	8.72281	2.52382	4.28297	5.20618	3.84917	3.45183	6.64		21.6091	12.8906	26.9873	10.342	8.43261	9.66193	0.918728
ENSG00000130313	25796	PGLS	6-phosphogluconolactonase		59.9558	54.8032	55.285	70.0356	57.412	78.6017	47.8798	23.2481	42.4775	20.4211	21.3924	15.7568	41.6663	64.3737	52.8953	49.1347	54.8806	46.5083		41.6495	27.0984	37.7229	33.7246	28.3897	16.9419	0.918721
ENSG00000196141	26010	SPATS2L	spermatogenesis associated serine rich 2 like		30.1288	29.4008	36.3889	41.7006	65.5666	121.247	102.997	92.9609	73.6429	63.5371	95.4974	83.2461	53.1118	49.3624	30.2551	53.8712	46.3191	55.1575		114.679	113.883	102.595	87.4898	95.0482	95.9972	0.918668
ENSG00000117602	11123	RCAN3	RCAN family member 3		31.2845	51.546	38.1797	17.743	20.6228	10.1751	6.40435	10.5329	7.2659	9.94378	7.41846	6.67614	13.2084	36.0108	42.1382	46.2278	15.8049	24.0208		16.3911	8.06938	8.12738	18.9319	15.5608	6.45855	0.91859
ENSG00000088727	64147	KIF9	kinesin family member 9		2.73082	2.53094	3.14307	3.60015	4.22793	5.41445	7.33961	9.24887	9.57043	7.81834	7.9155	7.48018	4.74423	4.62016	2.6731	3.0401	3.00469	3.31083		6.35353	11.2912	11.8549	8.49125	11.6525	11.6527	0.918573
ENSG00000184524	51286	CEND1	cell cycle exit and neuronal differentiation 1		21.0785	33.2876	36.9638	67.8839	63.082	120.811	192.404	201.838	294.037	198.039	227.17	220.368	7.43969	27.6587	22.4951	34.4654	40.2465	33.1479		67.3042	172.942	268.438	191.165	245.117	249.73	0.918542
ENSG00000090534	7066	THPO	thrombopoietin		0	0	0	0	0	1.45838	2.38745	2.20468	2.70434	2.19473	3.2103	3.27912	0.977134	0.887584	0.45188	0.601774	1.13199	0.795486		2.17051	5.80442	5.76534	4.50193	5.4991	7.41442	0.918342
ENSG00000048471	92017	SNX29	sorting nexin 29		46.2389	97.7307	84.723	69.8166	72.641	37.0965	30.4696	21.457	21.7461	22.44	32.0863	33.712	41.5537	39.9934	56.658	76.5875	60.7232	61.7563		34.7042	21.3143	21.1908	27.1727	23.3563	24.7529	0.91834
ENSG00000130558	10439	OLFM1	olfactomedin 1		118.57	218.386	225.842	203.22	211.311	679.689	1388.72	1629.18	1944.78	1491.11	1933.22	1386.03	31.542	182.735	165.733	213.721	204.55	158.869		509.528	1375.17	2131.76	1179.72	1510.99	1500.17	0.918311
ENSG00000075624	60	ACTB	actin beta		3988.42	4016.79	5106.1	4097.73	3856.36	4069.74	2840.15	2994.98	2468.26	2634.14	2856.79	2180.08	3242.33	3232.71	3315.92	3519.69	3578.37	3106.6		2558.55	2378.81	2642.77	2307.15	2270.75	2073.55	0.918277
ENSG00000133636	4922	NTS	neurotensin		4.96784	2.31985	1.25963	1.99004	0	0	0	0	0	0.508604	0	0	0.780704	9.53641	4.00793	1.2265	0	0		0	0.687924	0	0	0	0	0.918258
ENSG00000144792	285349	ZNF660	zinc finger protein 660		8.98102	6.59152	4.69296	7.75138	6.39728	1.96127	1.50438	1.25692	2.03256	1.42797	1.93445	1.53861	24.4529	15.4433	10.2396	13.6349	11.3722	13.852		4.09937	2.50367	1.94904	2.52192	2.16888	2.29483	0.918246
ENSG00000114520	8723	SNX4	sorting nexin 4		71.4199	115.132	113.667	50.0606	70.2561	38.8063	38.4516	41.1734	27.4572	47.6713	40.0461	36.1425	50.9314	71.7579	85.625	79.3874	62.9833	68.7479		49.3585	38.7275	36.3051	39.513	43.5909	38.8038	0.918213
ENSG00000163479	6746	SSR2	signal sequence receptor subunit 2		228.203	262.318	284.383	215.773	144.289	280.126	120.372	98.9687	103.57	95.9124	74.2949	72.1701	154.708	188.581	242.16	214.508	204.076	182.902		175.36	112.158	113.763	112.491	109.168	89.1909	0.918174
ENSG00000183943	5613	PRKX	protein kinase X-linked		48.9128	78.2044	51.24	53.2368	23.2355	9.63872	8.45399	3.95326	4.69297	4.66609	6.17766	4.35903	54.4471	63.453	103.405	74.1464	43.3478	64.0482		24.4101	10.8429	9.36459	7.368	6.77382	7.70774	0.918127
ENSG00000080031	5794	PTPRH	protein tyrosine phosphatase receptor type H		0	0	0	0	0	0	0.885979	4.06799	4.46772	6.27703	3.74774	4.69236	0	0	0	0	0	0		0.641165	3.34108	3.78301	10.5651	6.81085	4.62015	0.918032
ENSG00000072682	8974	P4HA2	prolyl 4-hydroxylase subunit alpha 2		2.2347	2.50963	2.81349	7.17346	12.2539	32.8387	12.291	22.2653	9.58745	10.0411	11.7004	15.0852	8.6427	5.56057	4.60712	6.86423	11.6944	9.1145		17.7643	24.0873	14.0795	10.149	13.7712	17.022	0.917967
ENSG00000196757	90592	ZNF700	zinc finger protein 700		13.1889	8.88575	7.84338	8.1861	6.30991	3.40289	3.75638	2.95953	2.65474	2.42913	2.82078	3.02951	20.5766	22.7303	21.99	15.7763	22.2399	17.0379		12.7255	8.22262	5.1226	5.64283	6.75831	5.93805	0.917963
ENSG00000254708	---	---	---		1.71361	2.00815	2.39982	1.31433	0.92344	1.02254	0.629739	0.937643	0.484952	0.537675	0.578164	0.565197	0.652831	0.531568	0.606138	0.863903	0.598892	0.459486		0	0	0	0	0	0	0.917962
ENSG00000162419	10691	GMEB1	glucocorticoid modulatory element binding protein 1		33.7323	46.1495	51.9359	44.5368	48.7567	14.9358	11.5225	12.3027	9.94585	8.50495	10.7138	10.6285	36.9311	39.1009	46.0307	34.6524	57.1892	43.4036		15.6238	13.4578	10.3869	11.5294	11.2065	11.6132	0.917946
ENSG00000086967	4606	MYBPC2	myosin binding protein C, fast type		0	0	0	0	0	4.54277	3.19877	1.68279	1.69379	1.37937	1.65498	1.13238	0	0	0	0	0	0		3.24508	2.01186	2.85206	0.677158	2.8536	1.75396	0.917934
ENSG00000170364	6419	SETMAR	SET domain and mariner transposase fusion gene		7.34284	10.7053	13.0609	8.90028	7.95405	2.79942	2.14174	3.75451	2.64737	3.49701	1.96926	2.72048	6.67286	4.18393	6.52543	6.98571	7.84693	6.56634		2.00603	2.01244	1.45333	1.45535	1.87484	2.02548	0.917903
ENSG00000139793	10150	MBNL2	muscleblind like splicing regulator 2		22.9681	15.4824	11.5637	12.7331	21.9863	37.8341	53.634	97.2715	84.0041	132.744	140.425	173.833	31.5481	17.9519	16.967	18.0319	19.4338	25.258		39.0064	83.7309	125.44	239.07	175.818	171.345	0.917874
ENSG00000165140	2203	FBP1	fructose-bisphosphatase 1		0	0	0	0	0	0.653757	0.726398	0.837145	1.76884	1.2334	0.808811	1.06156	0	0	0	0	0	0		0.856904	1.99202	2.29064	1.74717	2.02772	1.25721	0.917855
ENSG00000151065	196513	DCP1B	decapping mRNA 1B		14.3191	15.6307	13.0461	14.6109	11.4747	12.2537	8.02339	6.1591	5.63156	5.62186	7.74536	8.80861	19.4553	17.5094	17.8031	17.5328	14.5643	16.208		12.8719	9.15432	8.85917	7.15537	8.47235	10.4821	0.917836
ENSG00000179909	7710	ZNF154	zinc finger protein 154		23.7536	43.7607	31.5386	39.3441	25.8117	11.3821	8.76671	12.0704	7.52267	7.80638	10.0129	8.64976	63.7575	57.5934	68.6611	64.3411	83.1721	77.4037		28.7698	21.9986	14.647	10.958	16.2438	19.5944	0.917833
ENSG00000062370	7771	ZNF112	zinc finger protein 112		15.1728	23.2944	23.5191	14.5587	12.5903	2.59826	3.96623	4.40728	3.7208	2.43216	5.0574	4.16931	13.6325	14.7383	22.3052	18.5208	20.1382	18.8277		5.78187	6.34129	6.25483	7.49467	7.54535	6.44362	0.917796
ENSG00000120658	55068	ENOX1	ecto-NOX disulfide-thiol exchanger 1		24.7375	67.0984	74.4526	57.1727	64.6832	30.2237	23.2373	30.1475	17.9444	10.7285	21.6963	23.9011	7.90892	33.5707	43.5157	55.803	42.5839	51.0022		33.4821	34.4937	34.4038	20.2378	30.0818	23.97	0.917749
ENSG00000104904	4946	OAZ1	ornithine decarboxylase antizyme 1		305.294	199.021	243.029	254.254	206.32	358.577	433.588	535.668	669.101	586.586	521.796	430.5	209.221	266.186	239.018	249.86	212.751	217.637		390.014	672.561	786.207	554.014	729.565	655.724	0.917739
ENSG00000134308	10971	YWHAQ	tyrosine 3-monooxygenase/tryptophan 5-monooxygenase activation protein theta		789.89	962.108	1173.29	698.55	790.688	448.326	452.005	500.82	327.027	459.491	394.105	391.11	615.567	650.885	672.66	932.412	775.593	735.649		541.738	454.306	413.916	468.195	439.006	380.013	0.917618
ENSG00000122550	55975	KLHL7	kelch like family member 7		168.365	203.392	239.144	120.31	126.168	69.7508	51.6788	65.2122	33.6883	51.9695	49.6633	45.3851	109.681	143.148	143.344	156.991	130.611	133.05		82.7755	49.6887	36.3633	36.3487	48.3607	54.0258	0.91756
ENSG00000206228	---	---	---		9.27133	5.60452	6.93687	5.58414	3.02414	2.263	1.76529	1.59528	1.15337	1.07623	0.852947	0.722866	1.18049	1.08592	0.927155	0.932773	0.56326	0.785736		0	0	0	0	0	0	0.917478
ENSG00000148908	6001	RGS10	regulator of G protein signaling 10		3.68276	2.52867	2.28467	1.22715	1.14824	8.29768	7.2176	6.90947	12.2893	8.98364	4.75059	4.81942	4.18901	2.24495	2.92942	3.0211	1.02141	2.27175		10.5225	13.1082	17.6365	17.2363	12.8468	5.8575	0.917449
ENSG00000163297	118429	ANTXR2	ANTXR cell adhesion molecule 2		36.93	40.123	32.6471	15.8062	9.71274	5.4815	5.72031	3.91328	3.68279	3.77388	5.31281	3.40366	31.9355	23.5509	42.3437	32.7188	25.5428	17.3481		8.29144	5.33061	4.65232	3.53923	3.6906	4.11476	0.917245
ENSG00000158457	340348	TSPAN33	tetraspanin 33		7.75164	3.82165	4.1844	5.3218	5.80986	14.5335	15.022	14.0258	17.5233	19.6597	20.1389	24.4432	11.0786	6.2958	5.28436	7.2192	1.76183	4.21807		11.2238	16.043	19.4745	13.8445	16.9667	27.0199	0.917243
ENSG00000165119	3190	HNRNPK	heterogeneous nuclear ribonucleoprotein K		1215.84	761.348	902.847	537.576	559.461	390.326	377.005	397.67	253.844	355.211	359.205	320.489	1271.05	983.173	967.18	829.812	701.623	714.636		526.498	465.876	427.535	412.752	440.028	419.158	0.917076
ENSG00000118513	4602	MYB	MYB proto-oncogene, transcription factor		5.42733	3.54228	3.75588	4.18322	3.19889	0.854913	0.804646	0	0	0.593057	0.557781	0	13.1439	9.98647	7.3372	9.62025	5.54935	6.3495		4.27969	2.14099	1.62595	0.719235	0.719455	0.847286	0.917042
ENSG00000120800	27340	UTP20	UTP20 small subunit processome component		27.4514	30.2856	27.2308	20.9705	21.4813	7.25838	9.9912	9.64677	8.38397	7.90249	9.60562	11.554	84.7204	29.2752	40.5499	40.4883	38.3835	35.9204		19.063	16.2991	10.883	15.5089	15.5953	13.8941	0.91685
ENSG00000182983	389114	ZNF662	zinc finger protein 662		5.78356	6.84709	6.82086	10.5303	7.62478	3.26878	2.92422	1.56712	1.37401	1.39258	2.11113	2.13948	33.7644	28.7814	23.202	25.3507	27.8661	30.6888		14.9215	7.25219	5.07739	5.3829	4.76216	6.0796	0.916849
ENSG00000197961	7675	ZNF121	zinc finger protein 121		7.78823	12.9277	7.8739	9.20244	7.12003	4.5763	4.52923	2.51705	1.33627	1.58811	3.02083	2.28953	36.1107	26.5898	26.8071	18.7446	28.7346	23.9637		16.8337	10.2615	4.30507	4.77266	6.49413	5.84932	0.916669
ENSG00000163322	84142	ABRAXAS1	abraxas 1, BRCA1 A complex subunit		8.3869	6.8557	6.96126	3.54196	3.25416	1.55896	2.07549	1.54863	1.96711	2.44659	2.13084	2.24785	20.2538	8.33179	8.47398	6.95312	6.55323	5.51747		2.50191	1.45549	1.90859	2.9587	2.07649	2.3036	0.916665
ENSG00000152217	26040	SETBP1	SET binding protein 1		150.936	244.893	199.259	159.093	150.534	59.7936	43.2874	43.6606	21.3679	22.5923	39.7116	35.0387	126.207	140.296	234.039	192.946	226.73	241.795		99.5583	35.7875	28.7312	17.0295	24.7177	28.9812	0.916575
ENSG00000106078	23242	COBL	cordon-bleu WH2 repeat protein		0.869448	5.5219	6.17165	16.9178	46.8138	73.1034	96.5434	143.668	133.39	160.252	199.468	219.234	1.62637	1.95855	3.59154	5.86895	9.12073	16.1624		67.4436	100.789	225.088	213.07	211.124	196.735	0.916527
ENSG00000154096	7070	THY1	Thy-1 cell surface antigen		49.6902	82.206	80.9238	96.4927	100.811	328.907	511.88	977.295	636.144	771.003	880.288	926.322	42.3654	71.5226	103.099	109.923	153.6	110.055		276.916	1280.29	1483.57	887.095	1447.81	1435.35	0.916511
ENSG00000186019	100379224	LOC100379224	uncharacterized LOC100379224		1.53607	2.72257	1.96779	1.19829	0.960817	0.687283	0	0.401545	0	0	0.566006	0	14.2179	15.4569	21.4743	21.9254	19.5127	12.6067		8.87385	7.3405	4.42365	3.5323	5.9667	5.77706	0.91647
ENSG00000158636	56946	EMSY	EMSY transcriptional repressor, BRCA2 interacting		41.8512	66.8378	52.3664	39.1035	37.9533	17.3162	16.6072	17.2388	9.96895	12.9102	15.8577	17.0596	88.3571	61.1546	68.3992	70.5167	69.1833	63.2511		35.896	22.5877	17.7231	22.157	21.3046	22.8744	0.916356
ENSG00000136830	64855	NIBAN2	niban apoptosis regulator 2		90.6594	87.474	77.0102	98.6583	78.3521	134.657	48.8243	41.3319	61.7754	27.9539	51.6216	35.5857	52.8779	59.9871	81.4925	69.1162	94.9086	71.4696		49.6509	30.1728	42.9007	26.3454	26.8051	27.6974	0.916353
ENSG00000164941	55656	INTS8	integrator complex subunit 8		58.5313	34.1101	35.1508	25.0014	19.6637	12.2202	11.386	13.5919	10.273	11.4116	13.9707	14.2789	99.2762	67.2452	55.7197	57.2404	41.2452	48.5107		24.6735	33.7077	16.9944	26.0303	29.0199	24.5148	0.916337
ENSG00000237440	100129842	ZNF737	zinc finger protein 737		23.0666	29.0722	26.5605	18.9958	13.7742	5.07919	5.93295	7.05362	3.43087	4.73161	7.25064	7.63735	25.3256	23.9931	28.7876	31.3616	28.5508	26.2624		11.2323	7.42724	4.77981	4.20937	5.4731	7.20443	0.916334
ENSG00000065526	23013	SPEN	spen family transcriptional repressor		106.476	208.036	153.229	240.447	210.541	89.7323	89.448	59.7558	51.9892	60.6062	88.6606	91.8171	281.649	199.294	265.409	312.603	325.124	316.76		169.19	90.7691	65.5804	69.7278	75.1347	90.69	0.916203
ENSG00000144028	23020	SNRNP200	small nuclear ribonucleoprotein U5 subunit 200		544.497	477.836	448.715	370.866	299.193	241.203	178.924	196.037	117.096	112.847	171.767	172.378	756.165	413.657	511.772	470.336	365.846	394.249		268.48	158.299	140.011	121.181	131.96	166.65	0.916188
ENSG00000198053	140885	SIRPA	signal regulatory protein alpha		20.3316	13.2858	11.1397	33.2345	27.8072	224.44	319.64	242.531	348.001	303.032	517.09	478.417	30.2814	26.42	20.014	36.3505	9.80318	33.8755		158.66	360.452	468.619	306.146	418.239	534.889	0.916183
ENSG00000157557	2114	ETS2	ETS proto-oncogene 2, transcription factor		9.5413	18.2358	15.7967	13.0606	17.2168	55.8375	52.1422	65.4791	52.1319	100.951	151.467	177.208	28.2297	18.813	14.7844	18.5951	16.3497	17.9369		54.6923	117.676	89.5165	66.3387	132.087	177.266	0.916119
ENSG00000117242	100861548	PINK1-AS	PINK1 antisense RNA		1.71145	2.73752	2.4343	2.63205	2.21138	1.45838	1.50246	1.03015	0.950283	1.18438	1.1155	0.925288	11.5783	8.246	8.21343	9.32986	8.54933	6.7842		4.61921	3.27291	1.93275	1.76863	2.60505	2.39931	0.916117
ENSG00000213971	---	---	---		7.45005	6.78706	5.54606	6.6323	3.99677	3.13468	2.05725	1.6287	1.32002	3.66162	2.25479	3.17067	16.047	8.6094	8.29352	7.57725	8.25977	7.91386		3.20405	2.1082	2.28734	2.78524	2.55664	4.08638	0.916033
ENSG00000054654	23224	SYNE2	spectrin repeat containing nuclear envelope protein 2		352.095	425.217	337.483	169.053	87.5608	44.9416	35.7702	27.317	20.7825	14.8398	24.2232	22.9032	552.105	350.417	661.456	501.447	245.249	371.129		98.5782	35.8031	27.6473	20.4723	23.319	27.8157	0.916016
ENSG00000253051	109616966	SNORA31B	small nucleolar RNA, H/ACA box 31B		1.29009	1.77918	1.66031	1.14993	0.725123	0	0	0	0.737978	0	0	0	0.618219	0.727836	0.89252	0.915585	0.8799	0.65616		0	0	0	0	0	0	0.915988
ENSG00000165899	283310	OTOGL	otogelin like		0	0	0	0	0	0.452601	1.7978	4.56581	1.18288	3.53402	3.16694	5.82541	0.615939	0	0	0.497272	0	0		2.29923	5.55606	3.27099	2.57523	6.11357	11.6762	0.915969
ENSG00000197083	---	---	---		11.5067	15.9533	12.7331	13.0708	13.8322	2.83295	4.78844	0.788777	1.7739	1.10187	1.01375	0.530615	26.402	51.3691	33.0931	38.4699	34.8662	36.5431		7.92265	6.21774	1.73179	3.64784	3.46383	1.47227	0.915951
ENSG00000162804	25992	SNED1	sushi, nidogen and EGF like domains 1		1.30543	4.87704	1.67771	1.6283	1.98454	6.05144	8.52822	7.9764	9.36838	7.15489	11.452	12.2108	3.77239	5.08012	9.9631	4.64753	4.13568	2.03349		12.1401	23.2531	23.6108	21.1511	21.0939	33.4199	0.915935
ENSG00000175183	1466	CSRP2	cysteine and glycine rich protein 2		204.245	290.017	439.531	434.105	556.33	137.239	35.9129	12.9876	27.178	11.6736	9.09528	9.41816	107.07	119.724	226.098	136.396	255.31	325.55		97.7899	43.6922	22.81	12.7353	15.7523	13.7426	0.915857
ENSG00000106086	84725	PLEKHA8	pleckstrin homology domain containing A8		64.7321	69.0601	52.2417	39.5352	33.8391	11.6503	12.8032	17.9968	9.23148	10.0894	14.9325	14.3038	131.633	67.071	65.1747	68.2823	55.2915	63.9463		27.5432	21.7314	12.0761	14.8117	15.9816	17.2283	0.915848
ENSG00000196724	147686	ZNF418	zinc finger protein 418		11.2037	17.0268	15.8881	18.6791	17.4699	8.56589	7.66871	6.88683	7.47135	4.0213	7.26031	7.80974	31.5522	25.2697	30.1836	25.869	32.2099	27.8228		16.8144	6.63438	4.51186	10.0259	8.54029	10.2203	0.915525
ENSG00000089009	6128	RPL6	ribosomal protein L6		746.731	604.034	836.619	688.167	487.767	394.785	278.61	187.24	209.673	182.397	185.263	150.346	834.784	888.106	919.041	807.693	765.593	788.266		603.832	364.693	396.69	323.792	373.561	293.136	0.915509
ENSG00000171368	11076	TPPP	tubulin polymerization promoting protein		11.4916	33.8275	28.9473	46.3288	84.5207	139.25	133.259	264.743	189.012	228.801	460.674	605.003	7.07381	30.7677	30.7577	37.268	56.9971	41.8688		159.285	245.668	388.528	438.202	488.488	584.51	0.91547
ENSG00000131473	47	ACLY	ATP citrate lyase		540.583	437.959	504.097	323.501	354.23	229.536	151.034	125.808	93.4164	93.8545	130.556	139.004	381.776	333.696	438.112	389.55	346.918	282.846		212.06	121.003	117.28	92.5076	101.204	119.048	0.915431
ENSG00000147274	27316	RBMX	RNA binding motif protein X-linked		606.754	369.512	444.527	258.582	257.734	104.316	88.4403	97.0056	80.8304	70.9015	70.7038	75.6847	744.492	524.204	547.779	444.829	416.134	386.721		193.918	117.844	118.952	132.969	128.992	118.868	0.915414
ENSG00000248099	3640	INSL3	insulin like 3		0	0	0	0	0	0.888439	0	0.589518	0.464662	0.479991	0.475117	0	0	0	0	0	0	0		0.425332	1.97195	1.02255	1.67815	1.12121	0.726015	0.915379
ENSG00000127903	90485	ZNF835	zinc finger protein 835		9.67841	15.8007	12.4178	16.3256	11.6312	9.67225	5.18037	6.11318	4.0974	3.85086	6.27506	5.97832	7.23979	8.78922	10.4902	11.2165	14.5651	10.6672		5.85368	4.0713	5.7994	5.93792	5.19002	4.64394	0.915291
ENSG00000166793	219539	YPEL4	yippee like 4		2.01454	4.75404	6.2057	13.6021	16.64	28.9832	17.5054	32.3536	22.5816	33.1068	35.6101	49.5288	1.2309	10.1479	6.18467	8.18345	15.2835	23.2421		23.4435	32.147	60.7359	63.0722	74.7337	90.6153	0.91529
ENSG00000138468	57337	SENP7	SUMO specific peptidase 7		43.9056	48.2515	48.9195	36.1963	34.3026	13.6954	20.939	12.9395	14.6681	8.51289	13.5423	11.6451	92.613	115.431	88.4807	84.7888	86.7977	101.151		35.5978	23.8494	15.5077	26.0975	23.824	22.0208	0.915193
ENSG00000083093	79728	PALB2	partner and localizer of BRCA2		14.4688	16.3921	13.9766	11.7597	12.6583	9.16936	7.03324	5.11789	4.89194	5.34146	6.86477	7.70151	28.7038	17.0632	17.0301	19.951	18.1431	18.1604		12.9805	8.67557	7.56515	6.93703	9.14228	10.7889	0.914988
ENSG00000150275	65217	PCDH15	protocadherin related 15		0	1.4708	1.18069	1.97295	2.97791	5.68265	15.8528	7.7759	10.574	11.699	7.39674	5.7839	1.45294	3.6247	2.1385	6.01095	2.19334	9.7546		21.5183	16.3094	14.9872	12.7596	11.1499	9.91226	0.914943
ENSG00000142528	25888	ZNF473	zinc finger protein 473		24.2888	22.2559	20.3077	23.6442	18.1929	10.2757	9.37729	15.8125	6.21125	7.32747	7.26039	8.54244	27.5989	20.5899	26.2472	26.6684	25.5724	23.1069		13.6922	18.8345	13.2674	9.12879	12.3092	10.7342	0.91489
ENSG00000163956	4043	LRPAP1	LDL receptor related protein associated protein 1		77.5382	54.5344	61.4912	80.0602	71.3259	128.388	138.011	238.182	193.14	193.152	176.595	155.983	79.8197	71.8758	65.5678	70.5497	57.2202	53.9811		89.0816	193.702	222.086	198.124	196.171	194.186	0.914827
ENSG00000099956	6598	SMARCB1	SWI/SNF related, matrix associated, actin dependent regulator of chromatin, subfamily b, member 1		229.158	179.242	236.203	228.544	186.49	114.642	77.8167	67.2123	76.1552	56.5118	64.0689	55.3991	197.093	200.763	197.74	176.38	139.516	151.606		96.3799	70.6875	76.7058	69.9146	72.673	70.9094	0.914709
ENSG00000090621	8761	PABPC4	poly(A) binding protein cytoplasmic 4		100.831	111.253	117.5	112.299	109.232	86.5473	64.0591	69.0654	47.308	43.7422	55.751	48.989	194.078	142.186	135.123	124.501	123.255	118.598		106.176	83.2734	73.4796	62.3711	62.8059	60.9084	0.914708
ENSG00000070601	22844	FRMPD1	FERM and PDZ domain containing 1		1.28983	2.3401	1.7612	1.63474	2.10492	4.7104	6.78598	5.32517	6.95032	6.74751	8.65738	7.29472	1.05846	2.55041	1.71757	3.64196	1.50246	1.79786		5.21429	4.54666	6.55831	6.32341	5.92783	6.86086	0.914691
ENSG00000178921	5198	PFAS	phosphoribosylformylglycinamidine synthase		63.3696	43.5898	48.4363	50.8099	41.664	27.1393	18.2664	23.0434	13.0061	18.7924	18.6083	24.7609	151.002	58.6436	65.4874	55.0939	63.3661	50.6129		27.2124	17.1775	19.2966	17.7117	17.4149	20.3667	0.914674
ENSG00000237172	84752	B3GNT9	UDP-GlcNAc:betaGal beta-1,3-N-acetylglucosaminyltransferase 9		0.617238	0.539365	0	0	0	6.62138	3.05195	2.28555	4.45844	5.05708	6.22164	7.16662	0.429231	0.500192	1.36872	0.86734	0.570001	0.611236		4.97453	4.74896	9.43834	11.682	7.7941	8.89413	0.914644
ENSG00000176428	155382	VPS37D	VPS37D subunit of ESCRT-I		43.4352	47.399	51.3014	56.2266	44.5357	67.1023	22.6402	20.9686	18.9276	9.41446	14.6402	9.14767	10.2826	26.5229	23.4581	23.35	26.0465	21.6257		21.5841	10.9067	13.3182	6.74676	7.83497	6.41096	0.914557
ENSG00000196652	23660	ZKSCAN5	zinc finger with KRAB and SCAN domains 5		36.9049	37.8507	39.4002	32.3202	30.2884	18.0873	17.3357	21.0902	11.6542	14.8881	18.1014	17.4478	43.8047	32.8627	37.4595	40.8149	38.8038	37.0958		28.095	22.0082	16.5046	15.2058	17.8482	19.7221	0.91451
ENSG00000168748	766	CA7	carbonic anhydrase 7		0	0	0	0	0	1.25722	3.32457	13.4587	9.60961	8.85894	13.3783	11.3833	0	0	0	0	0	0		0.899851	11.1624	17.2045	12.0955	12.1826	15.9391	0.914508
ENSG00000250510	27239	GPR162	G protein-coupled receptor 162		24.4579	48.6351	53.539	102.69	126.783	220.484	185.22	248.445	217.275	166.936	188.15	162.084	25.2513	59.4042	46.4724	54.282	87.313	93.8622		143.38	190.506	239.007	136.485	159.115	186.239	0.914334
ENSG00000103275	7329	UBE2I	ubiquitin conjugating enzyme E2 I		158.298	122.622	123.519	140.219	97.4584	103.813	73.0168	63.1935	72.0982	48.0746	75.2421	67.3478	178.702	170.223	164.964	142.874	127.923	131.163		101.834	91.9891	101.487	79.7741	88.5615	91.5732	0.914332
ENSG00000101546	79863	RBFA	ribosome binding factor A		16.6836	14.342	16.5914	19.7004	18.0351	12.7231	7.16463	6.20515	8.33019	3.78786	3.96907	6.23251	22.25	30.9339	25.7799	20.8798	29.0116	25.4405		14.1007	9.39905	8.49768	11.2022	11.1768	10.666	0.914301
ENSG00000187815	339559	ZFP69	ZFP69 zinc finger protein		10.3961	14.6931	16.4379	16.3517	18.2523	9.16936	8.32056	5.56747	4.82878	3.07481	5.32398	4.36216	10.6483	13.6154	13.6992	15.1432	20.1466	18.4991		14.3605	9.03175	7.39563	8.34247	8.19415	6.28418	0.914292
ENSG00000137142	347252	IGFBPL1	insulin like growth factor binding protein like 1		209.819	199.598	147.719	80.2242	17.9835	4.60982	3.28171	7.53257	0.987854	1.64136	1.10143	1.33618	39.6078	68.2497	104.149	106.108	42.0818	35.7358		4.90474	2.80182	1.27967	0.470624	0.593703	0.730742	0.914245
ENSG00000088305	1789	DNMT3B	DNA methyltransferase 3 beta		33.3236	10.0719	7.2508	18.7975	11.1552	5.01213	3.14834	0.646341	1.40221	2.00974	0.889894	0.788767	79.07	54.5145	23.8442	24.1276	17.6519	27.9616		11.8049	4.8766	1.90097	2.22865	2.03714	2.25526	0.91421
ENSG00000166887	23339	VPS39	VPS39 subunit of HOPS complex		101.307	182.57	165.282	158.441	156.337	118.833	99.4854	75.1736	69.6548	76.6425	118.986	146.454	125.472	125.311	151.323	159.973	162.735	157.89		121.206	94.4847	99.9959	98.8808	102.126	146.33	0.914196
ENSG00000135148	10906	TRAFD1	TRAF-type zinc finger domain containing 1		77.6697	91.3859	113.342	93.9141	89.3095	57.2791	33.1801	23.3743	35.2918	26.0179	23.9868	23.885	61.3617	72.2704	78.082	74.8319	74.6496	70.5431		52.3069	30.8106	27.0444	46.8095	29.8662	24.9064	0.914091
ENSG00000186174	283149	BCL9L	BCL9 like		66.503	173.727	132.114	143.755	130.586	93.6884	42.2083	37.6551	18.0494	28.9721	31.9503	23.8704	78.7548	106.109	194.871	155.557	208.584	150.786		132.863	49.4938	44.9851	23.4237	25.5469	31.8873	0.914082
ENSG00000180628	84333	PCGF5	polycomb group ring finger 5		24.3327	12.4553	9.67224	7.18576	7.22101	24.1219	48.769	61.703	43.9341	77.8732	86.2531	72.3761	17.0259	15.838	16.4431	14.8426	10.9444	22.8782		27.3211	55.8422	44.6222	50.8994	55.9246	65.5547	0.91407
ENSG00000141127	5636	PRPSAP2	phosphoribosyl pyrophosphate synthetase associated protein 2		102.31	121.39	149.976	93.8118	87.3674	65.7947	46.6958	36.7808	38.6244	24.1567	32.2893	32.6407	75.8966	107.512	106.992	95.557	91.0038	85.189		59.9114	39.1128	39.91	49.4506	46.2361	38.8641	0.913917
ENSG00000183783	386617	KCTD8	potassium channel tetramerization domain containing 8		0.852045	0.922204	0.661626	1.07071	2.54688	5.28034	8.3484	16.4983	10.4588	15.563	19.7214	17.1744	1.23466	3.0198	0.796138	2.76648	0	1.94152		5.83726	10.214	13.9346	22.5297	19.8751	19.0867	0.913899
ENSG00000152601	4154	MBNL1	muscleblind like splicing regulator 1		44.6098	20.0765	15.954	19.5707	21.8064	25.9994	47.8964	73.5483	49.0483	67.0751	92.4291	90.4024	43.2685	33.0059	28.0949	34.2841	29.5165	36.2812		32.2142	65.1916	60.2441	75.9313	83.4252	88.5206	0.913874
ENSG00000112983	10902	BRD8	bromodomain containing 8		113.941	82.7625	94.0396	87.798	89.9156	55.3682	48.7039	57.1121	45.0156	46.4045	53.4336	70.8849	191.607	162.679	154.998	127.364	119.161	127.825		87.9941	70.9704	70.0988	77.6252	87.4146	99.8405	0.91384
ENSG00000269693	---	---	---		1.58514	4.44393	3.70573	4.14889	3.62121	1.86069	1.31621	0.48877	1.052	0.792288	1.76643	1.61356	1.08183	1.29533	2.2778	2.74882	3.50844	2.39646		1.13929	0.563277	0	0	0.585091	0.825842	0.913817
ENSG00000008118	57172	CAMK1G	calcium/calmodulin dependent protein kinase IG		3.13898	8.90681	8.01877	13.3264	12.3546	33.6098	28.6462	74.9886	45.7584	71.6677	76.4899	111.896	7.88268	6.58202	3.18385	9.02825	3.81607	6.76885		32.6911	70.2831	65.9954	29.6676	69.6004	134.09	0.91376
ENSG00000129625	7905	REEP5	receptor accessory protein 5		65.4228	108.022	120.96	115.249	186.383	243.684	341.184	481.517	279.952	339.441	462.015	444.73	41.1639	78.3233	78.9399	142.921	189.307	182.566		333.469	452.762	509.347	467.528	554.502	562.693	0.913673
ENSG00000196214	90321	ZNF766	zinc finger protein 766		16.7857	22.1893	21.8677	20.0605	15.4211	5.51502	5.13771	2.58019	4.08991	3.2435	4.19526	4.49599	22.124	19.4554	24.8146	18.6848	29.5708	24.391		11.568	7.57782	5.53802	7.38488	5.90231	6.81701	0.913582
ENSG00000091482	23676	SMPX	small muscle protein X-linked		0	0	0	0	0	0	0	0	0	1.61878	1.93566	1.78533	0	0	0	0	0	0		0	0.70101	0.619179	1.27498	2.15242	2.86419	0.913484
ENSG00000169071	4920	ROR2	receptor tyrosine kinase like orphan receptor 2		16.1144	0.915539	0	0.420312	0.934023	3.43641	2.07094	1.52387	0.950531	2.33987	2.14337	1.41459	46.3997	11.9413	4.44445	1.71997	0	0		2.8277	1.02986	1.70795	0.7407	0.71025	1.44757	0.91344
ENSG00000120594	84898	PLXDC2	plexin domain containing 2		59.9323	127.331	86.1342	14.7717	13.3651	34.448	24.787	21.0068	16.3768	19.339	21.5102	30.19	51.9988	42.7624	98.3984	51.7172	16.766	11.9632		33.9114	44.4302	25.5271	26.0966	37.2352	31.4383	0.913396
ENSG00000163029	79677	SMC6	structural maintenance of chromosomes 6		33.8827	25.6644	26.1786	18.0869	20.126	8.23063	11.0679	9.45175	7.40831	7.29013	9.69914	9.51437	78.9849	41.572	40.4075	38.6467	34.8623	38.4202		24.2324	25.1394	13.6666	23.6061	25.4907	19.6645	0.91335
ENSG00000141738	2886	GRB7	growth factor receptor bound protein 7		0	0	0	0	0	1.55896	0.646302	0.732178	0	0.483442	0.632315	0.83407	0.753306	0	0	0	0	0		1.0073	0.951513	0	0	0.800648	1.10457	0.913286
ENSG00000198000	55035	NOL8	nucleolar protein 8		32.4071	34.4381	37.6953	27.1281	29.5421	13.3601	13.5288	15.7206	11.194	7.80063	14.0608	16.1845	54.8895	43.4847	43.3551	38.6436	40.1532	40.6629		26.4621	26.5276	20.7862	27.4711	25.79	24.6964	0.913277
ENSG00000079246	7520	XRCC5	X-ray repair cross complementing 5		837.619	736.676	820.881	410.272	454.025	235.436	164.434	252.081	156.827	200.07	179.012	208.729	743.058	452.502	545.493	510.681	439.01	413.431		258.708	211.182	189.456	194.041	182.117	190.4	0.913252
ENSG00000133195	201266	SLC39A11	solute carrier family 39 member 11		7.26498	4.80073	4.16413	6.05223	5.46185	8.39826	8.73564	8.75916	10.5488	15.0978	16.841	15.7697	7.8322	4.94801	6.81173	6.02221	5.67696	7.07457		6.97099	7.24009	15.9176	17.9942	19.0115	15.8955	0.913243
ENSG00000136490	80774	LIMD2	LIM domain containing 2		82.9591	67.3267	58.7104	82.677	61.0965	41.8237	38.3276	30.8413	47.6289	22.3311	21.9447	17.9158	68.171	100.556	76.0354	59.3344	67.792	57.8529		35.7535	47.9263	52.109	30.0994	33.9772	28.8008	0.913214
ENSG00000157349	11269	DDX19B	DEAD-box helicase 19B		22.3063	19.9451	24.9748	21.8325	22.229	19.3277	12.0929	9.8709	9.96992	7.31475	8.22136	7.63704	24.5143	28.5281	28.0575	25.8334	25.234	23.7875		22.2096	11.7711	12.8849	13.4257	14.2502	12.0386	0.913207
ENSG00000134297	51054	PLEKHA8P1	pleckstrin homology domain containing A8 pseudogene 1		2.93201	2.69445	2.74413	2.30314	2.68974	1.12312	1.26075	1.17299	0.685305	0.511237	0.920576	1.04602	4.08299	3.27555	2.35806	3.09707	2.22117	2.20288		2.08548	1.58469	1.14245	0.838826	1.4264	1.10347	0.913202
ENSG00000164627	221458	KIF6	kinesin family member 6		0	0.441555	0.739013	0.572696	0.925813	1.55896	1.04497	1.16691	3.97065	5.00261	2.81954	3.60748	1.9416	0.921926	0.475766	0.735717	0	0.676889		1.05779	1.43518	3.37343	9.47561	4.99172	4.58915	0.913102
ENSG00000120458	79684	MSANTD2	Myb/SANT DNA binding domain containing 2		19.9298	16.6438	18.8032	16.6723	16.4654	8.02947	8.39461	5.27897	7.23943	5.13217	6.51391	6.66212	53.7955	60.1844	38.5483	35.6349	41.3121	37.113		20.8938	19.3559	11.551	18.8594	18.2086	14.7917	0.913096
ENSG00000065883	8621	CDK13	cyclin dependent kinase 13		60.6238	74.6921	61.2552	58.1869	62.5498	33.811	38.6898	26.3594	24.9786	26.1285	36.8504	37.6548	106.634	80.5142	84.1402	77.0237	93.3852	84.7448		53.9955	54.6634	33.6191	40.7663	45.1652	47.671	0.913081
ENSG00000108231	9211	LGI1	leucine rich glioma inactivated 1		1.09606	4.58521	4.34376	9.31987	17.1056	63.1797	74.1961	84.5334	48.7865	71.8422	60.7696	55.9823	12.9633	6.6708	3.93122	9.44069	21.5314	12.9442		81.3595	113.867	74.3121	45.4406	78.3867	84.7395	0.912938
ENSG00000184205	64061	TSPYL2	TSPY like 2		7.20562	9.11323	10.0237	16.2515	30.4639	70.1867	108.831	180.886	107.195	211.231	256.733	295.434	23.5194	33.1051	20.4781	27.602	34.4367	38.6116		159.634	281.975	292.935	193.616	319.124	554.884	0.912931
ENSG00000197548	10533	ATG7	autophagy related 7		20.0241	10.5988	11.6186	11.0004	9.57399	16.9139	22.5885	40.3575	34.272	38.5756	42.2754	40.0027	24.9492	18.5497	18.1098	16.523	13.104	14.5162		16.5373	32.7941	35.8716	32.3994	35.6287	46.1324	0.912875
ENSG00000248540	283731	LOC283731	uncharacterized LOC283731		6.02048	9.08575	8.60231	18.634	11.9167	5.04566	3.15735	4.42617	2.15039	2.45953	1.65888	1.90199	3.89845	7.09475	6.62334	11.8301	15.9208	12.9908		7.41815	4.29457	3.45771	0.844496	2.70926	2.44888	0.912863
ENSG00000205002	441376	AARD	alanine and arginine rich domain containing protein		0	0	0	0	0.660117	2.36358	2.89762	3.35429	3.38336	1.78032	2.04314	1.33137	0.498199	0.581094	0	1.05752	0.476111	0.550055		2.83383	4.33882	6.48938	3.42569	2.69985	1.93142	0.912858
ENSG00000163041	3020	H3F3A	H3 histone family member 3A		270.187	226.828	183.575	170.461	80.6197	101.031	63.576	22.9769	21.8248	29.3084	30.8412	26.1303	310.357	269.447	294.447	283.3	217.179	231.691		122.128	73.2574	46.5282	55.9878	52.7949	45.6197	0.912793
ENSG00000103549	9810	RNF40	ring finger protein 40		154.288	162.049	176.022	197.443	193.418	182.901	118.625	126.913	90.0385	68.7079	98.9795	89.9554	170.065	153.513	152.542	168.316	162.316	151.403		145.788	115.617	95.9159	77.09	85.1767	95.288	0.912717
ENSG00000167536	147015	DHRS13	dehydrogenase/reductase 13		11.5576	13.4203	12.6008	13.9816	10.691	14.9694	6.30677	3.73552	5.48601	3.51894	2.88117	2.90428	19.0577	26.4728	22.799	30.1118	28.2973	24.1449		18.6725	18.5093	12.1164	10.4236	9.41176	8.24719	0.912659
ENSG00000153130	60592	SCOC	short coiled-coil protein		66.4948	51.9219	64.4736	43.9297	78.103	120.945	155.54	265.662	153.667	212.257	206.285	173.113	79.6528	100.01	59.7513	88.8515	70.2195	92.9987		132.53	205.53	190.541	214.634	244.575	218.76	0.912564
ENSG00000260290	---	---	---		15.2513	13.4022	15.0195	10.8629	9.57994	4.47572	2.71916	4.42654	2.3526	2.61083	2.05505	2.14936	1.23942	1.01954	1.42317	1.12721	0.750807	1.11534		0.42105	0.513625	0	0	0	0	0.912465
ENSG00000149050	7761	ZNF214	zinc finger protein 214		7.1629	4.34001	5.28115	4.80102	5.14631	3.43641	2.57199	3.07934	2.22616	2.21516	2.1678	2.3347	12.4058	8.27954	7.16154	7.08736	8.7002	7.18274		3.86156	3.7515	1.90145	2.31776	2.70097	3.67078	0.912442
ENSG00000182944	2130	EWSR1	EWS RNA binding protein 1		380.474	263.947	341.138	313.137	324.708	156.147	169.527	154.174	122.859	120.033	152.254	133.933	586.758	547.025	489.548	398.953	460.53	434.013		311.102	307.366	269.966	291.153	264.012	250.15	0.912391
ENSG00000244879	---	---	---		9.11794	6.78713	6.56086	8.87511	6.8795	4.07341	4.17336	2.23585	4.84056	1.86007	2.80978	2.79583	21.3089	26.1966	18.5249	13.3379	19.384	19.7813		11.7022	4.88381	6.58581	8.3431	6.22498	6.87757	0.912357
ENSG00000065325	9340	GLP2R	glucagon like peptide 2 receptor		0	0	0	0	0	0	0	1.20145	0	1.01755	1.97511	4.36378	0	0	0	0	0	0		0	3.3763	2.33181	1.06075	2.26257	6.79561	0.912321
ENSG00000204394	7407	VARS	valyl-tRNA synthetase		158.832	201.886	222.665	166.88	131.388	72.9693	48.733	66.5482	50.9565	47.6032	69.144	69.0915	147.62	123.615	166.308	118.257	136.008	107.765		67.8168	45.8806	42.3729	43.3186	36.6328	48.7885	0.912277
ENSG00000116157	2882	GPX7	glutathione peroxidase 7		35.8936	16.6135	18.4071	14.3355	11.0069	8.59942	8.01208	2.4911	4.91375	3.14012	2.55499	1.75498	28.2865	17.3288	15.2076	13.6399	7.426	9.77972		7.41356	4.28736	2.68492	3.12666	2.3672	2.32705	0.912254
ENSG00000136653	---	---	---		1.15451	2.59571	1.48653	1.56775	1.43591	6.58786	12.1101	29.2852	21.7801	23.7829	31.7055	38.3587	1.49987	2.8163	2.2237	4.33644	1.45699	1.34491		12.2412	24.197	33.4814	17.5499	42.2941	30.7046	0.912174
ENSG00000071894	29894	CPSF1	cleavage and polyadenylation specific factor 1		157.67	85.8653	83.5063	122.889	87.5812	67.6387	48.9162	43.5154	41.4609	36.3798	46.179	55.0107	272.896	224.487	168.386	149.296	132.456	122.237		82.4575	72.4319	50.2902	61.3871	60.7207	63.6404	0.912087
ENSG00000152078	148534	TMEM56	transmembrane protein 56		2.35364	5.21927	5.11749	3.79849	8.73631	12.1532	20.2386	24.5878	16.5588	40.6377	41.4226	35.8049	6.74227	3.93161	2.38526	4.88691	3.74857	6.72361		11.78	22.272	16.8312	26.7244	28.526	42.4463	0.912065
ENSG00000155275	152992	TRMT44	tRNA methyltransferase 44 homolog		10.0398	11.5847	10.9448	11.4019	10.4533	7.76127	5.39861	7.2244	6.08478	4.74908	6.69584	6.72368	16.6658	13.8937	15.2096	14.6635	17.0558	18.8603		9.24364	8.74986	8.19677	7.85651	9.96104	10.8402	0.912034
ENSG00000145721	167410	LIX1	limb and CNS expressed 1		95.1516	0.941651	1.21588	1.78242	3.73714	41.1867	56.7041	18.8189	21.9044	20.7045	19.6783	13.7287	158.499	62.5987	11.0061	9.68543	2.59057	5.54503		43.8467	41.6203	24.5182	22.2379	16.5719	19.1333	0.912034
ENSG00000169884	7480	WNT10B	Wnt family member 10B		0	0.752498	1.79721	9.42991	21.5941	59.5589	35.7006	45.4624	34.7479	33.048	39.795	41.5512	0	1.88078	1.1147	3.26967	8.9097	6.46646		36.3618	62.5073	54.9779	26.8478	35.9201	50.5807	0.912017
ENSG00000140937	1009	CDH11	cadherin 11		22.0706	46.3585	54.0393	107.204	159.054	56.4745	75.427	67.5919	38.1081	44.1925	48.4233	38.8096	134.76	43.3994	36.1411	79.8244	136.509	144.566		79.6669	89.2926	52.5316	30.4291	43.6361	35.0647	0.911997
ENSG00000054118	9967	THRAP3	thyroid hormone receptor associated protein 3		239.375	214.515	239.629	164.502	189.517	116.117	84.671	94.7056	61.2982	67.5734	104.085	95.7294	289.178	206.699	218.047	186.926	199.031	177.503		135.793	110.962	115.117	96.2094	105.997	123.227	0.911997
ENSG00000138400	130752	MDH1B	malate dehydrogenase 1B		1.96142	1.18176	0.847847	0.959608	1.29649	2.09537	3.18854	3.5132	5.07934	5.28087	4.47572	5.37118	5.52315	3.12264	1.62101	2.72844	1.56615	1.10245		2.75769	4.92884	6.15998	5.1831	5.28562	7.90504	0.911966
ENSG00000172273	25988	HINFP	histone H4 transcription factor		38.3351	35.2266	42.1167	43.5871	38.3686	32.1347	22.1675	19.5359	21.1629	21.4359	20.7714	26.4818	37.1322	46.1386	52.0373	46.5278	48.3204	46.4476		34.936	33.2449	29.7849	27.867	32.0639	33.4243	0.91196
ENSG00000178821	339456	TMEM52	transmembrane protein 52		1.12139	1.80698	2.08155	3.83624	3.86664	21.8087	7.5365	6.35426	6.91977	2.57383	2.24612	1.50338	1.01855	1.32492	1.06767	1.93187	3.66867	2.51407		7.40422	4.88396	3.98274	2.88639	1.87227	1.60186	0.911925
ENSG00000166860	9880	ZBTB39	zinc finger and BTB domain containing 39		30.1121	26.7826	22.1936	27.1947	19.8792	8.26416	7.92338	5.35156	3.87313	5.45623	7.53321	7.32418	49.438	24.5986	22.7637	24.9066	26.0565	29.8327		12.9608	7.33289	6.29875	6.63268	6.48605	7.42223	0.911912
ENSG00000225526	100129480	MKRN2OS	MKRN2 opposite strand		0	0	0	0.544334	0	0	0.435579	1.88006	1.00541	2.0473	1.3257	1.72045	0	0	0	0	0	0		0	2.03573	1.62513	1.64603	2.13649	2.0317	0.911855
ENSG00000235026	389023	DPP10-AS1	DPP10 antisense RNA 1		0.901971	1.07856	0.989436	1.04032	1.24475	3.23526	4.14126	6.369	7.41686	3.29269	4.95699	4.45103	0.560328	1.90049	1.54984	1.27364	1.08212	0.929591		2.70202	4.49097	8.89576	3.69425	5.09025	5.56694	0.911843
ENSG00000044090	9820	CUL7	cullin 7		67.7167	71.9282	56.2832	61.2933	50.28	52.1497	28.4658	45.4626	24.0947	27.7268	30.4781	33.91	116.732	89.1733	97.4885	81.4762	94.7089	70.6096		46.5836	29.9846	34.9438	27.7744	31.0946	41.2854	0.911806
ENSG00000163104	56916	SMARCAD1	SWI/SNF-related, matrix-associated actin-dependent regulator of chromatin, subfamily a, containing DEAD/H box 1		99.9992	138.605	140.197	67.6112	81.1211	19.9312	29.5654	24.8765	15.0512	22.0277	23.362	22.745	179.298	125.819	116.601	131.198	114.296	123.287		44.3143	35.8491	17.8781	26.339	30.1074	30.1285	0.911751
ENSG00000106327	7036	TFR2	transferrin receptor 2		1.58944	1.472	1.64915	7.23888	12.5886	79.9092	38.1139	21.0033	8.13337	8.99084	7.83445	11.4474	3.58499	7.83283	4.36037	7.55313	11.9235	8.49604		32.0093	13.0958	11.5565	5.95245	7.18456	12.6533	0.911742
ENSG00000133816	9645	MICAL2	microtubule associated monooxygenase, calponin and LIM domain containing 2		3.05031	16.8845	12.9599	17.5055	22.61	103.511	116.57	266.919	116.897	249.881	270.845	344.709	2.26046	5.24109	20.2848	15.611	43.1359	15.4758		112.679	210.855	275.949	219.053	300.126	341.759	0.911722
ENSG00000143869	151449	GDF7	growth differentiation factor 7		0	0	0	0	0	0	0	1.06148	0.479121	0.653638	1.05824	1.42998	0	0	0	0	0	0		0	0.626617	0	0	0.59242	0.888135	0.911722
ENSG00000249487	101929743	LINC01586	long intergenic non-protein coding RNA 1586		0	0	0	0	0	0	1.007	0.853281	0.832929	0.708816	0.642231	0.650575	0	0	0	0	0	0		0.947881	1.0386	0.866625	0.423292	0.758983	1.21359	0.911708
ENSG00000074356	55421	NCBP3	nuclear cap binding subunit 3		42.7548	45.2949	44.9471	43.1211	41.1767	16.9139	17.3102	13.6529	16.0966	11.0171	15.5337	18.1663	98.2188	62.5043	57.9046	53.7876	50.2113	60.3444		29.8466	24.7735	19.0651	36.5646	25.938	21.8753	0.911702
ENSG00000234614	---	---	---		0	0	0	0	0	0	0	0.496942	0	0.897265	1.14847	1.43715	0	0	0	0	0	0		0.434992	0.729888	0	0.531429	0.797375	1.16461	0.911685
ENSG00000088247	8570	KHSRP	KH-type splicing regulatory protein		270.979	225.067	216.347	177.651	173.413	201.307	126.502	121.171	85.1608	83.8577	120.706	95.7289	358.608	218.706	227.343	193.952	186.321	151.85		166.457	122.295	115.058	99.3049	93.5437	92.3824	0.911655
ENSG00000108424	3837	KPNB1	karyopherin subunit beta 1		403.217	299.821	326.975	215.258	216.268	145.151	138.494	179.382	117.611	110.982	160.985	171.44	653.285	322.49	340.383	322.604	282.613	262.605		204.177	203.464	154.091	163.385	175.586	191.38	0.911646
ENSG00000256087	9668	ZNF432	zinc finger protein 432		25.8641	19.6953	18.5574	14.9611	10.2916	5.31387	6.34419	4.83481	6.1039	3.9801	6.06821	5.81703	39.6474	39.4054	38.4659	31.5382	27.9982	26.9817		21.2254	18.0032	6.50653	9.75267	10.6721	11.2376	0.911639
ENSG00000272373	---	---	---		1.52525	4.81401	5.0669	4.70794	1.78437	0.854913	0.884008	0.768562	0.650069	0.630405	0.415522	0.71818	3.21379	3.92174	5.06947	5.90477	8.18	3.91854		1.4385	0.9824	1.12274	0.554779	1.015	0.635971	0.911514
ENSG00000006007	51573	GDE1	glycerophosphodiester phosphodiesterase 1		56.8703	60.3085	59.1684	38.4623	37.9826	57.6144	78.4754	85.4123	103.75	94.5502	98.418	114.843	64.6671	49.1828	57.0177	62.8894	49.1729	41.9178		78.3164	94.9609	147.099	158.971	152.398	133.241	0.911426
ENSG00000161281	1346	COX7A1	cytochrome c oxidase subunit 7A1		1.41576	1.70052	1.92874	2.98904	2.85238	16.3774	26.0902	21.3152	48.7963	43.0325	35.89	28.9085	0	1.5045	1.22247	1.91828	3.19017	2.11755		6.29954	12.4043	37.0896	29.036	35.4348	32.9478	0.911372
ENSG00000105701	23770	FKBP8	FKBP prolyl isomerase 8		312.527	274.188	343.015	468.999	426.681	844.805	688.342	1034.61	1046.84	892.596	892.383	704.951	149.898	207.217	200	209.85	239.85	212.238		363.561	526.265	836.171	626.975	655.878	623.177	0.911331
ENSG00000247679	---	---	---		0.957183	1.31309	0.839898	1.70854	1.4943	0.821387	0.479724	0	0	0	0	0.559202	1.81894	2.08186	2.18088	2.38494	2.59244	2.1398		1.36614	0.666165	0	0.72112	0.707756	0.946117	0.911312
ENSG00000166788	113174	SAAL1	serum amyloid A like 1		30.2592	14.8048	16.8717	14.382	11.5043	7.45953	6.59713	6.1136	6.86489	4.56281	4.44169	5.78378	42.4596	37.3769	30.6878	21.1676	21.6263	21.4337		15.0272	11.3819	7.86732	12.9937	11.4333	8.41697	0.911231
ENSG00000272129	---	---	---		0	0	0	0	0	0.486127	0.791093	1.5334	1.36938	1.86864	1.85608	1.86273	0.77103	0.407571	0	0	0.429873	0		0.622527	0.895283	1.43009	1.30422	2.15492	2.12105	0.91118
ENSG00000172053	5859	QARS	glutaminyl-tRNA synthetase		292.805	181.608	204.916	165.474	130.841	126.376	85.7772	78.6966	71.9597	67.3346	65.0434	60.0857	291.726	189.417	195.26	156.221	154.108	126.989		92.6871	57.2271	71.7188	87.1075	75.7245	73.0168	0.911178
ENSG00000132639	6616	SNAP25	synaptosome associated protein 25		67.6038	337.157	381.329	239.781	225.114	246.165	541.285	2116.52	862.435	2473.5	2816.51	3176.34	9.29373	113.841	158.628	282.85	213.28	190.88		361.617	1742.45	2244.8	1783.88	3429.03	4161.94	0.911134
ENSG00000172270	682	BSG	basigin (Ok blood group)		477.001	272.31	342.666	288.518	305.97	2225.51	768.253	766.017	1074.84	678.77	784.953	523.027	333.54	300.388	262.5	233.016	218.707	191.647		379.864	575.466	783.876	481.663	483.449	511.634	0.911079
ENSG00000169891	9185	REPS2	RALBP1 associated Eps domain containing 2		6.7432	14.4662	11.7428	16.1368	25.7023	31.6988	39.8202	142.463	47.3813	131.285	140.074	186.881	3.22972	8.43585	11.6926	16.5634	18.2999	22.1983		35.1519	71.7723	93.1136	105.675	132.288	155.606	0.91106
ENSG00000234745	3106	HLA-B	major histocompatibility complex, class I, B		8.42109	5.37178	3.90433	6.58926	11.5606	252.602	129.824	100.796	193.84	126.048	118.506	109.67	9.74219	6.26818	10.2387	9.72083	5.90134	16.9331		157.78	207.408	184.98	135.47	114.74	102.801	0.91098
ENSG00000113649	10915	TCERG1	transcription elongation regulator 1		71.8093	80.5319	75.3531	71.1451	77.7666	31.5647	35.136	36.8658	23.0794	28.7678	40.5867	46.0545	233.062	204.255	178.889	139.94	172.704	167.33		114.535	79.531	70.7257	71.6009	85.5177	99.1613	0.910977
ENSG00000189403	3146	HMGB1	high mobility group box 1		598.38	282.959	333.77	202.969	248.103	166.44	194.135	158.172	138.972	136.409	128.047	113.934	626.58	657.372	552.044	419.686	392.267	431.456		317.738	273.673	229.497	286.828	283.285	239.262	0.910912
ENSG00000113300	57472	CNOT6	CCR4-NOT transcription complex subunit 6		119.366	139.922	123.205	83.594	87.2522	27.0387	29.4234	23.0227	19.992	21.5976	28.7209	25.5052	182.427	121.145	122.554	132.184	141.733	128.414		53.9639	38.0601	27.5262	27.5897	29.5001	28.0443	0.910845
ENSG00000104064	2553	GABPB1	GA binding protein transcription factor subunit beta 1		48.6422	26.0878	30.2407	22.9258	22.5914	9.7393	12.2128	12.4467	7.85948	8.84991	8.09903	7.91267	48.4592	32.4739	27.868	28.7987	24.7962	28.5086		16.005	16.1244	9.5822	9.63406	10.3574	8.9435	0.910751
ENSG00000157766	176	ACAN	aggrecan		0.453269	0.522356	0.55147	0	0.46448	5.64913	6.28255	3.03362	4.09869	4.37632	2.38168	2.4116	0.718123	0	0	0.966991	0	1.09481		4.7372	3.80568	2.73422	2.64803	1.11561	1.75669	0.91074
ENSG00000107789	9562	MINPP1	multiple inositol-polyphosphate phosphatase 1		33.0258	31.1127	28.6655	19.5463	17.5119	11.7509	11.471	13.0216	9.02173	8.84129	10.2377	9.89451	34.3478	32.6957	25.8447	29.7328	22.2063	23.6079		16.8706	14.2389	10.0172	19.3191	13.3524	12.5591	0.91072
ENSG00000037637	54455	FBXO42	F-box protein 42		64.5717	74.5551	64.6148	63.817	58.5588	58.7878	31.7309	28.9113	27.0981	26.5885	37.9564	39.0612	61.5092	70.636	78.1035	71.1489	86.2257	69.1991		56.9127	45.3142	38.7409	35.7394	40.1077	43.5903	0.91067
ENSG00000105467	23546	SYNGR4	synaptogyrin 4		0	0	0	0	0	0	0.536099	1.62801	1.88577	1.69672	1.20239	0.563707	0	0	0	0	0	0		0	1.09446	1.33446	1.19781	1.64667	0.480391	0.910531
ENSG00000090861	16	AARS	alanyl-tRNA synthetase		143.395	138.14	188.221	161.976	176.519	190.042	184.307	344.557	196.254	320.753	340.648	423.523	126.359	133.747	147.478	136.258	134.076	137.668		186.372	245.992	266.32	301.864	326.717	439.209	0.910502
ENSG00000136261	28969	BZW2	basic leucine zipper and W2 domains 2		146.1	200.367	263.522	141.061	146.994	82.189	49.2324	50.026	40.4715	30.5246	28.5752	30.9303	123.018	150.894	161.372	179.058	184.745	122.493		92.0867	55.2268	53.0583	43.9904	48.8678	45.3154	0.910407
ENSG00000103126	8312	AXIN1	axin 1		43.3054	48.3484	47.2978	69.8106	50.0987	40.5497	29.3701	21.6392	24.9158	14.3946	22.1179	20.8376	46.4729	52.006	59.2117	49.5208	61.3502	49.0502		45.0045	36.8774	31.6553	33.778	31.8408	26.6931	0.910401
ENSG00000132950	9205	ZMYM5	zinc finger MYM-type containing 5		9.20347	6.99557	6.37972	5.01106	4.90988	3.8052	2.62413	2.21097	1.98345	1.96451	2.42732	3.29956	15.3618	10.1346	11.0207	10.1647	8.75243	8.54414		5.90455	3.87506	2.42361	4.13518	3.88284	4.13581	0.910295
ENSG00000161542	5635	PRPSAP1	phosphoribosyl pyrophosphate synthetase associated protein 1		81.5434	54.3546	59.4565	61.366	49.9189	45.7127	33.108	30.9668	36.9018	27.8246	35.4429	40.0519	75.2277	76.7716	69.9978	62.7338	63.764	55.9378		43.7348	36.0981	40.3316	48.2128	50.159	48.2468	0.91028
ENSG00000141499	55135	WRAP53	WD repeat containing antisense to TP53		40.6732	23.6303	25.2389	27.253	18.6875	16.1092	8.10665	9.27124	9.69921	6.92089	7.36564	6.70974	35.6074	33.7011	33.231	23.2241	25.266	22.9619		15.7148	10.3693	7.91547	8.98454	8.46316	7.59628	0.910278
ENSG00000132436	63979	FIGNL1	fidgetin like 1		28.2415	24.9576	23.4988	20.0154	22.107	11.8514	7.21309	6.3011	5.32419	6.076	7.77479	7.28117	47.6512	32.0686	37.0372	28.9439	40.9749	37.9691		16.2756	13.0087	9.43726	9.95426	13.9575	12.0907	0.910243
ENSG00000014641	4190	MDH1	malate dehydrogenase 1		153	141.262	172.256	140.023	128.671	264.403	292.415	698.558	329.472	501.758	610.959	683.55	135.342	152.014	148.546	171.593	157.363	128.464		212.26	537.141	570.081	556.513	765.462	871.106	0.91022
ENSG00000184254	220	ALDH1A3	aldehyde dehydrogenase 1 family member A3		1.95223	0.668774	0	0	0	0.653757	1.61123	2.62723	4.88601	4.57537	5.48965	7.93069	3.41511	0.983754	3.6877	1.32119	0	0		0.93453	1.82581	4.03964	5.89001	6.70437	10.6061	0.910197
ENSG00000228175	---	---	---		0.811229	0.68196	0.55823	0	0.586066	1.12312	1.0515	1.26089	1.20051	1.21159	1.71055	1.63105	0.86734	0.54136	0.482499	0.587048	0	0		0.693002	1.76561	1.73561	1.21334	2.18614	1.70259	0.910165
ENSG00000204267	6891	TAP2	transporter 2, ATP binding cassette subfamily B member		1.09689	1.45325	1.2714	1.86054	2.44248	6.55433	7.31151	5.34258	4.90171	4.24788	6.54311	7.27715	1.56425	2.07498	2.67651	4.59753	4.98299	4.29178		16.5595	14.2148	10.818	11.5172	9.78346	12.4461	0.91016
ENSG00000077942	2192	FBLN1	fibulin 1		256.516	199.18	194.793	175.465	130.546	113.1	53.2972	31.3601	33.4467	36.8255	37.7724	25.4605	284.63	122.869	179.872	158.372	99.9865	95.237		60.3841	22.8785	23.6461	14.4415	15.2795	16.1584	0.910155
ENSG00000101220	54976	C20orf27	chromosome 20 open reading frame 27		49.9553	41.7678	50.0238	81.6843	71.8329	100.729	81.2641	99.1903	110.488	51.9368	59.2655	40.1952	28.9415	26.5842	31.43	32.6034	50.6806	36.0799		46.9386	69.3458	86.7412	43.6074	43.5758	32.4835	0.910143
ENSG00000137501	54843	SYTL2	synaptotagmin like 2		1.46652	2.42917	2.15408	2.22075	2.37863	17.9867	31.2519	76.1286	55.5998	84.0704	104.061	106.517	11.5325	5.06606	3.81791	6.12378	5.73537	4.80751		15.3316	41.7201	91.2356	69.4377	113.713	150.436	0.910117
ENSG00000044574	3309	HSPA5	heat shock protein family A (Hsp70) member 5		211.76	194.317	230.26	160.03	168.483	241.605	195.681	434.007	259.77	155.081	215.087	236.037	403.647	264.934	224.609	260.154	184.194	193.775		225.238	455.998	330.583	247.094	336.904	273.011	0.910099
ENSG00000229212	---	---	---		3.67274	2.95504	3.32734	2.9615	2.57294	0.586705	0.757929	0.970075	1.08375	0	0.647116	0	7.30671	7.94628	3.51923	4.24819	5.07863	2.8136		0.797658	1.02587	0.763321	0.543136	0.77925	0.486091	0.909968
ENSG00000170242	55031	USP47	ubiquitin specific peptidase 47		171.631	197.466	181.058	114.711	125.237	50.5404	64.916	60.2189	55.6457	47.785	81.6512	85.0467	165.175	157.39	170.64	165.127	150.562	153.909		95.1447	98.0511	66.2732	99.2927	91.293	89.0442	0.909932
ENSG00000235597	150568	LINC01102	long intergenic non-protein coding RNA 1102		3.12438	13.9956	22.7371	84.3084	87.7288	15.5058	20.6687	16.1873	11.4591	8.0891	8.5642	8.25575	4.23198	14.7621	8.41193	26.9946	107.124	180.534		63.2187	20.3626	40.6498	44.1965	28.928	18.2894	0.909897
ENSG00000132475	3021	H3F3B	H3 histone family member 3B		800.743	520.719	562.685	434.362	329.39	408.129	273.641	128.344	249.077	175.575	191.923	180.195	663.194	811.107	634.087	561.964	385.362	471.334		455.517	316.623	256.71	375.967	270.511	225.327	0.909834
ENSG00000234284	345462	ZNF879	zinc finger protein 879		7.41518	10.3746	10.2725	11.2862	7.85504	2.63179	4.73679	2.76296	3.36147	3.08788	3.2573	2.95326	7.97218	10.3134	9.65756	11.7453	13.2129	12.3108		7.00888	6.41626	3.57621	4.36333	5.71914	4.50262	0.909804
ENSG00000233901	100506119	LINC01503	long intergenic non-protein coding RNA 1503		0.614076	1.74003	2.15023	6.05177	4.539	3.40289	1.25188	1.57531	2.09022	1.8574	1.70238	1.47624	1.12557	2.81524	3.3971	5.17257	11.5347	9.62158		5.49282	6.96175	6.81768	5.15923	4.734	5.67316	0.909753
ENSG00000204120	26058	GIGYF2	GRB10 interacting GYF protein 2		78.5247	105.942	102.534	86.3331	98.7855	30.3578	52.1139	65.3182	44.8544	41.6559	67.5937	60.7437	117.98	91.3465	105.767	111.346	109.493	101.784		70.4058	57.0984	51.3992	49.1562	55.1981	64.0961	0.909717
ENSG00000162521	5928	RBBP4	RB binding protein 4, chromatin remodeling factor		348.372	253.65	269.165	162.317	157.177	96.471	90.3149	90.0403	46.8004	75.2242	82.8051	80.9616	492.825	386.631	397.551	358.908	346.402	308.07		174.594	140.666	134.608	125.207	129.24	134.943	0.90971
ENSG00000127870	6049	RNF6	ring finger protein 6		15.1325	19.6933	19.2836	14.8963	16.7539	15.4722	27.8896	46.1445	29.6207	35.7459	61.2031	67.5929	16.5624	11.5538	16.8276	18.1269	24.2388	22.2974		26.929	57.0624	46.0385	36.4054	51.3801	63.3586	0.909666
ENSG00000205978	57523	NYNRIN	NYN domain and retroviral integrase containing		106.697	76.7578	47.5303	93.6023	68.8307	58.5867	15.0744	6.8057	11.0636	6.56904	10.2985	9.97132	135.239	147.971	161.532	149.118	177.807	140.776		83.0952	17.9559	13.4485	8.50214	11.8462	13.0325	0.90965
ENSG00000113312	7265	TTC1	tetratricopeptide repeat domain 1		48.0118	42.8443	60.6813	43.8776	49.9438	52.619	60.0649	76.4402	98.1416	77.5058	81.2577	85.394	41.3164	45.0566	40.014	43.251	42.3122	42.5709		52.9887	79.0864	100.463	102.732	114.659	110.5	0.909645
ENSG00000162415	57643	ZSWIM5	zinc finger SWIM-type containing 5		54.1863	95.4552	79.1778	57.3617	43.2123	22.5798	14.3353	10.3531	7.49466	8.72905	11.991	10.0211	55.3344	63.1616	71.3327	85.7419	85.5851	67.2874		26.597	17.2058	10.2803	10.9801	10.9327	12.3624	0.909579
ENSG00000153914	140890	SREK1	splicing regulatory glutamic acid and lysine rich protein 1		88.1227	67.989	63.685	41.5953	49.2611	22.6803	43.3852	32.6083	29.2301	23.0562	37.0108	34.4608	213.225	136.83	120.497	101.797	94.1976	110.298		64.8959	66.9041	45.9159	53.3426	53.8512	52.8761	0.909544
ENSG00000182963	10052	GJC1	gap junction protein gamma 1		48.5419	54.7188	50.2081	61.6991	72.0504	23.0826	16.3297	5.75254	7.92576	3.37371	8.39302	6.27017	131.089	58.7178	77.2208	55.5767	148.122	98.6336		35.0024	10.3145	5.36543	2.89515	4.07206	5.29695	0.909521
ENSG00000083828	54807	ZNF586	zinc finger protein 586		17.247	14.4902	16.4591	13.9409	11.0328	5.17976	3.16862	2.53732	4.3849	2.57788	2.90867	2.75189	17.1538	15.527	18.0669	14.4672	19.2457	17.1098		7.54246	3.85234	3.07565	4.36454	3.22573	3.09051	0.909414
ENSG00000066735	26153	KIF26A	kinesin family member 26A		59.3711	185.447	109.993	65.8729	33.6088	28.2456	19.1696	10.399	9.20135	3.20332	6.90111	5.2748	65.308	76.1398	149.348	47.4023	90.4812	40.5468		15.9365	6.78417	7.28875	5.04153	2.99193	3.20909	0.909403
ENSG00000106346	84132	USP42	ubiquitin specific peptidase 42		34.4621	60.0552	46.258	45.304	44.3366	26.6029	16.9323	13.8437	8.64284	9.13682	14.1422	12.7079	54.8978	47.7755	49.5338	45.2325	60.4857	46.3943		33.136	21.3781	15.2489	14.9145	16.89	16.0996	0.909202
ENSG00000169031	1285	COL4A3	collagen type IV alpha 3 chain		0	0	0	0	0	0.687283	0.610497	1.51183	2.34061	2.52367	3.37631	1.97452	0	0	0	0	0	0.42893		1.69607	1.59303	4.14397	3.41774	3.06908	3.67896	0.909165
ENSG00000095585	29760	BLNK	B cell linker		0	0	0	0	0	0.620231	1.10784	1.27072	2.40399	2.55026	0.910783	1.27362	0	0	0.438843	0.438529	0	0		0.820506	2.77796	4.22475	5.33946	3.74028	1.92951	0.909131
ENSG00000100284	10043	TOM1	target of myb1 membrane trafficking protein		24.841	15.3073	18.2582	22.815	21.791	57.8826	53.1765	65.9715	62.2961	55.0251	73.854	65.1245	18.5111	18.6411	15.598	17.1731	12.0275	15.5671		27.3931	42.553	57.8161	50.5027	54.7768	65.9555	0.909124
ENSG00000141577	22994	CEP131	centrosomal protein 131		47.2017	21.6756	24.0818	32.9917	25.33	15.0029	12.1505	9.55529	11.5744	4.92277	10.8352	7.65601	59.9729	64.2089	43.3391	28.3809	34.0737	25.5895		16.6629	8.86218	11.3133	17.0476	11.3037	9.43276	0.909068
ENSG00000140950	57707	MEAK7	MTOR associated protein, eak-7 homolog		28.496	28.0774	26.8491	26.019	23.2163	17.8191	12.1274	14.0193	9.60847	12.1266	11.7784	11.2529	31.3928	21.4581	24.9277	23.9848	29.302	24.6547		14.5232	16.6327	12.2123	9.23086	10.9026	11.7515	0.909022
ENSG00000106462	2146	EZH2	enhancer of zeste 2 polycomb repressive complex 2 subunit		120.415	38.9307	45.7996	45.4169	24.4341	2.43063	2.55109	1.24587	1.13506	0.987425	0.791301	0.911563	194.792	180.677	137.53	74.4886	57.3573	78.4425		18.9239	7.86049	3.13173	3.59769	3.38005	2.07731	0.908985
ENSG00000140829	9785	DHX38	DEAH-box helicase 38		89.1847	96.7389	108.054	103.297	95.9737	51.8144	39.002	52.7606	34.6955	37.5745	49.1312	49.8954	107.059	106.989	128.263	109.674	113.734	116.536		82.1516	54.9889	54.8315	62.2479	57.8931	63.118	0.908956
ENSG00000186812	84307	ZNF397	zinc finger protein 397		18.6451	20.6285	18.0634	20.1024	18.5937	7.19132	7.88222	7.89537	9.34813	5.58253	9.05913	13.3752	53.5652	51.6798	50.3854	34.8265	45.8553	42.8995		18.9673	15.4962	10.8204	18.9498	16.1642	17.9335	0.908943
ENSG00000167434	762	CA4	carbonic anhydrase 4		0	0.742631	0	0.439028	0.871949	21.2722	21.3183	14.0142	47.5592	20.4872	33.6506	28.1003	0	0.459568	0.575097	0.557877	0	1.08273		3.7334	8.82885	34.3838	26.1004	30.4125	30.5373	0.908937
ENSG00000229852	---	---	---		5.14806	6.22838	6.78546	7.1933	6.4524	4.10693	4.90609	6.20215	3.82251	4.17669	3.43082	3.6908	4.01979	4.49166	4.48443	4.61547	5.54857	4.85648		3.58474	3.77209	3.05145	2.97896	3.07624	2.98282	0.908886
ENSG00000184785	644538	SMIM10	small integral membrane protein 10		1.10002	0	0	0	0.404314	1.69306	1.68358	1.33608	2.83336	1.67017	2.22577	2.09179	1.54199	1.12867	0.720908	0.662064	0	0.560997		1.18472	1.97366	4.18291	2.84149	2.36857	2.75446	0.908878
ENSG00000135108	23014	FBXO21	F-box protein 21		177.459	235.324	258.341	161.125	169.399	141.128	92.0633	84.9057	49.8883	86.6497	113.759	118.918	122.358	125.91	147.517	165.809	141.536	141.685		108.744	66.8035	65.6434	64.2642	76.7032	105.487	0.908751
ENSG00000167377	7571	ZNF23	zinc finger protein 23		1.46121	1.86399	2.20696	2.64278	2.46688	1.05607	0.849931	0.845154	0	0	0.560388	0.756214	1.94313	1.94201	2.27084	2.7447	3.55181	3.42392		2.8043	0.995891	0.458471	0	0.780778	0.990917	0.908724
ENSG00000179409	50628	GEMIN4	gem nuclear organelle associated protein 4		50.2437	45.3441	39.3278	40.2829	27.0149	21.5069	14.3832	14.4999	10.8232	12.7356	13.5048	13.3963	46.0327	29.6751	39.9956	29.8225	36.3291	32.6218		13.1244	12.5809	9.41357	6.54937	8.73665	11.1148	0.908684
ENSG00000254664	---	---	---		0	0	0	0	0	0	0	1.23047	1.91522	2.28519	2.75772	1.46046	0	0	0	0	0	0		0	0	1.51923	2.04308	2.12449	1.97544	0.908627
ENSG00000109917	8882	ZPR1	ZPR1 zinc finger		50.6823	64.3745	78.5373	70.1248	58.0724	30.1231	25.9806	37.6434	23.4603	23.939	24.6774	31.9504	41.6041	41.9238	57.8294	60.6108	66.9952	55.3569		43.9467	38.3478	37.4808	30.288	36.3622	33.4803	0.908596
ENSG00000149923	5531	PPP4C	protein phosphatase 4 catalytic subunit		135.631	89.253	117.18	108.015	90.3834	83.7647	65.484	39.3597	68.631	29.2273	34.6085	28.5049	85.7931	100.068	91.1935	76.5938	72.7224	68.9074		55.82	47.1204	42.1263	40.1222	36.0509	29.1613	0.908577
ENSG00000111262	3736	KCNA1	potassium voltage-gated channel subfamily A member 1		0.439192	2.34974	2.60339	2.49115	4.01283	6.99017	18.5808	75.4348	23.3519	64.2212	66.469	94.5581	0.671462	0.896068	0.643179	13.2638	0.959487	2.07062		17.5931	49.3393	44.0252	31.2026	59.9635	67.4902	0.908491
ENSG00000176986	9632	SEC24C	SEC24 homolog C, COPII coat complex component		140.023	184.073	192.196	149.375	141.712	147.866	78.9096	90.8418	66.7949	67.6657	86.6359	105.836	166.773	153.97	179.751	182.923	188.547	173.743		129.341	101.332	101.839	102.266	97.7712	112.969	0.908484
ENSG00000247317	---	---	---		0	0.921928	0.859608	1.12776	1.27668	5.64913	3.90416	5.02023	4.03802	3.8925	3.89675	4.51623	0	0	0.41299	0.406959	0.967115	0.694065		2.64919	6.16787	6.40434	2.47542	4.86493	5.35823	0.908482
ENSG00000174521	148014	TTC9B	tetratricopeptide repeat domain 9B		31.879	94.09	124.628	180.893	171.03	376.614	425.177	362.111	498.27	198.557	176.356	111.808	1.12442	34.7516	44.7208	48.898	116.567	72.2783		125.045	131.756	180.127	99.1283	106.782	75.0206	0.908429
ENSG00000269935	---	---	---		0	0	0	0	0	0	0.411813	1.49346	1.28278	1.45479	2.21177	2.48273	0	0	0	0	0	0		0.570298	2.09549	4.07063	1.95352	2.71496	4.4259	0.908401
ENSG00000112578	705	BYSL	bystin like		30.2413	26.513	30.8579	30.0835	23.7116	16.2769	12.4306	19.9586	11.8034	12.9844	14.4865	14.7889	28.5933	21.283	24.7398	22.0763	22.6678	20.2994		13.4694	11.8344	12.0458	10.5066	11.522	11.4218	0.908366
ENSG00000133106	94240	EPSTI1	epithelial stromal interaction 1		1.01269	0.622268	0.676275	0.929573	0.976952	9.13583	2.92951	3.05514	3.95409	2.9131	2.16116	2.8963	0.931454	0.956246	1.14137	1.278	0.912353	1.52946		4.94473	5.7099	4.50937	3.25891	2.90608	3.4847	0.908274
ENSG00000213588	221504	ZBTB9	zinc finger and BTB domain containing 9		21.2274	17.4662	17.6987	17.9924	18.4362	14.5335	11.1567	9.82321	9.59841	6.48174	10.675	9.35303	25.8255	22.5102	20.6036	16.5484	19.3022	18.3395		14.6836	16.235	10.7943	9.88931	11.1554	11.372	0.908263
ENSG00000173950	152002	XXYLT1	xyloside xylosyltransferase 1		28.0957	38.4195	34.7353	28.0251	27.8075	29.9555	18.2737	10.9513	8.53994	7.37835	7.88938	7.86422	35.2178	19.6495	20.511	24.5528	25.3901	17.9924		19.5308	6.07967	7.69221	5.47125	5.27825	6.61836	0.908208
ENSG00000096746	3189	HNRNPH3	heterogeneous nuclear ribonucleoprotein H3		408.516	262.463	371.856	238.109	292.658	122.454	112.317	100.895	112.253	93.3071	101.137	92.8535	489.665	479.62	411.268	349.977	398.646	381.369		244.745	198.575	148.912	182.501	182.382	155.525	0.908175
ENSG00000025772	10953	TOMM34	translocase of outer mitochondrial membrane 34		19.9327	13.35	14.3957	19.2731	17.9391	44.9416	36.1932	44.0896	32.5737	27.7839	58.9835	71.4749	31.7884	16.4901	17.5011	17.7747	18.3727	17.8267		32.9625	66.4278	47.9266	37.3385	54.5628	69.7666	0.90813
ENSG00000174444	6124	RPL4	ribosomal protein L4		2554.58	2563.94	3213.46	2473.29	1809.25	1348.2	800.675	573.019	577.694	518.985	466.903	414.681	2052.46	1895.46	2369.83	2075.31	2374.5	1923.34		1622.88	768.646	797.134	682.969	723.966	653.246	0.908051
ENSG00000174502	115019	SLC26A9	solute carrier family 26 member 9		0	0	0	0	0	0	0	0	1.59112	2.75779	0.496848	1.50356	0	0	0	0	0	0		0	0.688581	1.1709	3.43095	1.47718	1.1127	0.907981
ENSG00000145388	57721	METTL14	methyltransferase like 14		36.1912	29.6203	28.7507	21.6806	22.5104	9.97398	12.835	10.7895	10.2046	10.7632	13.5365	11.4757	36.5211	35.0816	32.6825	30.1734	34.0174	33.1813		21.5412	19.3487	16.204	18.613	19.5759	19.2867	0.907954
ENSG00000129473	599	BCL2L2	BCL2 like 2		18.8565	20.9179	17.9833	24.0106	25.0712	47.0872	96.5183	220.968	120.367	154.409	241.971	250.517	39.2532	36.7506	31.536	28.9618	32.2674	33.3176		46.3971	117.595	159.405	131.568	176.766	226.879	0.907942
ENSG00000119328	54942	ABITRAM	actin binding transcription modulator		9.54602	7.77417	6.33339	6.6161	5.91265	9.03525	9.388	10.854	10.632	10.2665	12.6331	14.7739	21.17	16.6446	12.8788	14.2416	14.8459	11.6675		13.1142	20.8846	16.546	17.8655	22.7935	25.8093	0.907934
ENSG00000231113	---	---	---		1.15749	2.33392	1.83137	3.17121	3.09128	2.06185	1.54522	1.06587	0.950487	1.38953	1.20488	1.30916	2.93873	3.84801	5.24764	5.07502	8.77626	6.01457		3.05815	2.30041	1.65735	1.67215	1.62903	2.18569	0.907926
ENSG00000108272	---	---	---		10.7686	4.91687	4.43456	9.77766	8.56473	16.9139	21.7814	20.1982	25.4807	26.3422	30.8197	31.8178	14.2987	18.057	10.8973	11.9603	12.1457	11.0759		16.4285	22.9857	25.8975	25.8432	28.6071	39.7559	0.907922
ENSG00000131669	4814	NINJ1	ninjurin 1		14.6168	5.78861	3.2125	5.99184	3.96968	45.1427	27.6552	18.6763	33.5953	23.7037	25.651	21.2675	11.5157	10.0054	11.076	11.9052	5.60048	8.88441		28.4451	29.0377	31.3332	27.9096	27.5886	23.0222	0.907858
ENSG00000147419	55246	CCDC25	coiled-coil domain containing 25		39.0294	22.0521	20.9478	14.5309	14.706	13.9971	26.3659	42.3752	30.2189	51.8873	56.0912	65.8006	52.5543	32.2421	27.5473	26.2705	19.5301	20.8301		23.7059	35.0352	51.8832	55.9124	69.0935	78.7567	0.907854
ENSG00000167384	7733	ZNF180	zinc finger protein 180		14.3192	19.4331	16.2125	14.1801	11.0464	3.57052	5.21527	5.65498	4.0797	3.52203	5.55467	4.40751	16.7089	17.1259	17.8304	18.3204	21.5656	18.9383		7.27536	6.59347	5.10901	4.82598	5.10069	6.20272	0.907853
ENSG00000142185	7226	TRPM2	transient receptor potential cation channel subfamily M member 2		1.10815	5.1303	4.19193	5.00252	4.80918	58.2179	41.4955	77.6453	40.3913	39.025	67.2387	63.0359	0	0.998102	2.57324	3.99594	3.31743	3.0079		25.0824	54.1264	63.2588	48.2132	56.9043	61.3763	0.90781
ENSG00000189079	196528	ARID2	AT-rich interaction domain 2		80.626	84.1981	69.9648	43.8546	38.1408	11.1139	17.9931	9.40073	14.4763	10.1636	14.6231	14.1285	130.475	73.3906	79.4245	68.4169	74.0539	64.8026		27.8994	22.127	11.3772	17.211	14.9013	15.1276	0.907715
ENSG00000163577	56648	EIF5A2	eukaryotic translation initiation factor 5A2		5.92406	7.91317	7.17352	4.10056	4.84731	3.53699	7.37745	14.7837	9.03289	20.882	23.3963	22.8249	4.08958	3.94004	5.53047	7.15799	8.93244	7.19785		4.94883	10.9818	9.92686	14.9399	16.8674	21.0478	0.907684
ENSG00000165512	7570	ZNF22	zinc finger protein 22		50.6363	33.723	34.1526	23.9868	24.375	23.2838	16.5078	7.65768	13.3977	8.69291	9.84719	7.59	108.117	87.9383	88.0012	76.93	66.9335	74.3059		48.427	34.8968	20.4243	25.9002	23.8271	19.7843	0.90765
ENSG00000097007	25	ABL1	ABL proto-oncogene 1, non-receptor tyrosine kinase		184.181	207.309	162.035	186.757	116.837	107.836	71.7211	33.0401	53.9654	42.9937	65.5787	61.6231	238.236	156.659	198.232	193.819	145.374	165.339		92.4178	52.6351	56.2963	74.2274	55.8566	53.5412	0.90764
ENSG00000127152	64919	BCL11B	BAF chromatin remodeling complex subunit BCL11B		273.474	955.442	670.346	170.526	96.3287	24.4237	13.9381	17.4221	8.95088	11.2717	20.3399	18.8431	15.9019	159.746	564.377	155.329	158.72	93.0005		32.5913	30.2189	16.6021	8.14145	12.965	15.7674	0.907617
ENSG00000226380	---	---	---		0	0	0	0	0	0	0.459435	0.439791	1.38444	2.18911	3.111	3.43623	0	0	0	0	0	0		0.858116	5.52861	3.85597	3.7135	9.26579	14.1893	0.907568
ENSG00000145198	90113	VWA5B2	von Willebrand factor A domain containing 5B2		0.738375	1.51844	1.6905	2.76974	3.25251	20.1994	50.8465	38.1005	73.9843	31.6007	62.7111	64.3338	0.453415	1.92357	0.710934	1.8515	0.484793	1.2018		19.4583	50.3605	67.0006	52.165	74.5637	73.9446	0.907566
ENSG00000236279	154790	CLEC2L	C-type lectin domain family 2 member L		1.39377	4.20686	3.75053	8.00521	7.31929	15.9751	21.3186	53.4153	51.1197	42.8176	57.8209	48.8399	0.736999	2.81445	2.13085	4.90179	1.53139	2.9989		9.83359	27.8233	63.9956	45.3132	46.6092	55.1844	0.90754
ENSG00000111364	57696	DDX55	DEAD-box helicase 55		18.0275	13.8762	12.6258	19.9879	15.6075	8.43179	7.83489	7.11204	6.68244	5.35306	10.9321	9.35986	43.7479	43.845	37.7868	24.9273	39.516	34.5542		24.182	22.0057	16.9007	20.2447	22.6432	19.7684	0.907514
ENSG00000124762	1026	CDKN1A	cyclin dependent kinase inhibitor 1A		3.86826	2.59403	1.47978	1.31867	1.77162	110.753	32.2222	22.5544	12.2287	15.6337	11.6415	7.60858	3.28337	3.32044	2.51122	3.24853	1.36324	1.56984		40.9979	39.0484	15.5468	4.82077	7.88432	11.0259	0.907506
ENSG00000155906	55005	RMND1	required for meiotic nuclear division 1 homolog		18.7784	20.321	22.4788	15.8682	13.7168	14.1312	8.44686	9.85673	7.66929	7.98959	12.5896	15.6157	21.092	17.3394	22.5418	20.1468	16.1922	14.656		11.3199	11.3579	11.4502	12.423	16.302	19.9314	0.907334
ENSG00000120217	29126	CD274	CD274 molecule		0	0	0	0	0	0	0.699747	1.27642	0.972369	1.70263	1.42682	2.04751	0	0	0	0.624113	0	0		1.51453	3.89023	1.70041	2.47814	2.6746	2.9771	0.907312
ENSG00000147140	4841	NONO	non-POU domain containing octamer binding		772.117	514.455	623.729	375.098	314.252	202.883	125.832	125.15	74.3345	90.8715	96.5079	97.717	770.382	520.219	601.081	463.046	428.83	393.15		223.735	120.614	97.7921	75.1899	91.3015	112.476	0.907286
ENSG00000136861	55755	CDK5RAP2	CDK5 regulatory subunit associated protein 2		128.07	83.1329	85.7001	75.6768	60.3551	27.3069	21.7514	20.5546	29.814	14.5414	26.9133	29.1123	192.112	134.908	144.366	105.5	105.893	101.142		44.995	41.8614	48.5785	65.7373	47.3971	44.4163	0.907227
ENSG00000172113	10201	NME6	NME/NM23 nucleoside diphosphate kinase 6		9.68938	8.82808	8.46812	10.6289	8.03955	4.47572	4.61087	2.41561	4.02566	3.76374	3.65221	3.34601	14.314	7.93495	7.7702	9.02352	8.62534	10.0045		4.79448	3.77241	2.94389	3.67568	2.60103	3.5285	0.907216
ENSG00000267640	---	---	---		1.83847	2.58812	2.47569	2.89814	1.93735	0.955491	0.929555	0.801848	0	0.541502	0.457091	0	0.913674	0.799037	0.894805	1.43777	1.63365	1.42653		0.762688	0	0	0	0	0	0.907198
ENSG00000146282	57038	RARS2	arginyl-tRNA synthetase 2, mitochondrial		58.6026	44.7691	57.058	43.0483	49.5795	34.2468	25.2178	21.3461	19.4241	16.3943	14.1091	14.6025	57.2187	54.5256	46.7377	52.182	52.0369	44.073		44.4544	22.7087	21.8339	24.8039	25.9858	22.6325	0.907131
ENSG00000131094	10882	C1QL1	complement C1q like 1		8.15428	3.41998	3.5313	6.77734	5.95724	54.5635	43.8793	23.2298	56.3406	37.4441	28.3032	19.7613	1.08219	4.34064	4.92174	6.31396	6.00393	6.41479		22.0243	22.9776	24.3551	17.8774	16.0723	13.628	0.907116
ENSG00000137274	670	BPHL	biphenyl hydrolase like		32.2858	25.8568	32.0284	27.9739	24.2519	10.2422	13.3398	10.1549	12.307	11.6087	6.63432	9.4968	31.1415	30.8656	35.0419	34.1696	29.5689	34.0564		21.2438	15.9122	14.8366	9.63282	14.783	15.6535	0.907031
ENSG00000105732	64763	ZNF574	zinc finger protein 574		24.7769	33.3394	35.5714	45.202	33.7849	41.3878	14.8264	14.9663	14.1131	10.8006	18.0671	15.4738	26.067	25.4978	31.7415	29.527	37.9327	29.9152		26.2876	16.8772	15.481	15.0574	14.5661	14.9552	0.906989
ENSG00000147854	115426	UHRF2	ubiquitin like with PHD and ring finger domains 2		93.5539	58.0855	64.3577	54.4761	51.2107	34.448	25.1762	27.7448	21.9931	20.7862	22.5195	27.3363	161.666	118.649	118.965	89.0363	86.2664	100.298		54.9041	41.2395	25.2813	37.528	36.6344	37.7268	0.906938
ENSG00000121900	113452	TMEM54	transmembrane protein 54		1.13913	0.4517	0.578608	1.9169	4.23721	56.6086	30.7834	18.2938	27.1813	24.3936	22.879	19.7155	1.27808	0.762838	0.611486	1.29639	2.64536	3.03806		19.9547	26.8692	24.2644	20.6186	21.0087	26.3487	0.906905
ENSG00000143420	2029	ENSA	endosulfine alpha		170.046	116.882	143.728	129.603	149.248	92.2803	208.433	369.869	435.065	349.68	324.646	306.032	156.49	151.939	135.853	136.165	136.721	141.267		126.458	330.934	466.722	329.576	444.245	432.663	0.906845
ENSG00000162591	1953	MEGF6	multiple EGF like domains 6		12.7075	13.964	9.4221	14.5687	12.6362	24.4572	7.99535	4.24747	7.03391	2.45115	4.8814	4.93084	63.374	37.4868	26.9471	23.6349	36.1977	25.0735		4.8195	2.24106	4.57728	5.51394	3.87474	4.48806	0.90684
ENSG00000132692	63827	BCAN	brevican		61.3467	26.0576	28.2234	74.5042	89.1402	685.02	817.975	247.989	665.398	309.731	284.058	165.918	1.50316	54.5139	110.123	176.35	26.0649	185.703		513.292	276.744	354.658	236.383	179.543	194.293	0.906805
ENSG00000060558	2769	GNA15	G protein subunit alpha 15		0.507922	0.618488	0.779616	0	0.495988	1.96127	3.13957	6.02917	8.46871	4.48686	5.39166	8.79459	0	0	0.642644	0.871881	0.774595	0.710488		3.55088	6.57549	5.33869	5.58424	7.52663	7.19317	0.906783
ENSG00000243317	647087	STMP1	short transmembrane mitochondrial protein 1		71.1423	78.0121	78.8308	41.1388	45.5691	45.6121	37.8517	16.8238	25.2595	27.7336	25.2182	17.5457	75.6788	87.3564	70.0335	71.9705	59.5115	63.4614		38.2963	32.4923	20.7376	29.5199	26.0771	22.2544	0.906729
ENSG00000115267	64135	IFIH1	interferon induced with helicase C domain 1		1.72791	2.49748	2.3762	1.55021	1.36246	4.47572	6.64109	6.17374	6.39907	7.55389	4.71422	5.36489	0	0.541505	2.3467	1.79404	0.722515	2.28674		7.16042	7.52676	4.98437	5.38071	4.40402	5.3326	0.906709
ENSG00000157873	8764	TNFRSF14	TNF receptor superfamily member 14		1.41965	1.40966	0.933257	1.52579	1.59784	15.5728	11.7189	11.2842	16.6495	10.6389	15.2182	13.2277	2.94046	4.69264	5.52914	3.24095	2.91994	5.91796		8.75534	21.6963	33.1005	24.1495	23.2565	27.7678	0.906694
ENSG00000196284	8464	SUPT3H	SPT3 homolog, SAGA and STAGA complex component		17.8505	14.4086	18.4895	10.2775	10.978	9.23641	6.22436	7.95799	7.82328	6.28329	6.64835	6.07386	26.9415	18.3618	14.9218	15.7151	11.7306	13.328		10.3765	13.3012	9.08188	10.458	11.0732	9.09117	0.906444
ENSG00000159753	146206	CARMIL2	capping protein regulator and myosin 1 linker 2		3.26709	14.3836	16.1008	26.3196	31.1446	53.2896	43.9821	48.4361	56.2518	37.6708	54.0881	46.4595	1.45064	8.55378	10.0381	14.8074	29.535	14.1544		33.122	54.36	76.7949	40.5868	60.2388	64.568	0.906375
ENSG00000166035	3990	LIPC	lipase C, hepatic type		0	0	0	0	0	0	0	1.10026	1.16354	1.63001	0.972785	0.819218	0	0	0	0	0	0		0	1.44175	3.8234	2.73144	1.76302	1.35172	0.906372
ENSG00000115457	3485	IGFBP2	insulin like growth factor binding protein 2		480.225	328.138	378.048	295.145	232.217	250.255	83.8267	45.2265	88.3711	46.0462	28.7114	26.3905	199.066	166.312	212.964	156.122	182.905	111.709		78.7216	26.7453	32.4387	23.4656	30.9067	18.4654	0.906226
ENSG00000144233	83607	AMMECR1L	AMMECR1 like		49.6405	58.6169	51.0958	42.6604	43.8832	27.441	25.4311	17.9569	16.2602	16.0069	19.6761	19.2656	62.4284	48.9346	57.2886	55.5968	60.7827	55.5325		44.2866	29.5636	19.4169	18.656	19.63	20.3883	0.90622
ENSG00000183486	4600	MX2	MX dynamin like GTPase 2		0.437403	0	0	0	0	2.263	1.82035	2.83246	2.84099	3.99226	2.48088	3.20872	0.624411	0	0.543077	0	0.563628	0		3.07466	2.29597	3.66786	2.98546	3.14709	3.32636	0.906153
ENSG00000143153	481	ATP1B1	ATPase Na+/K+ transporting subunit beta 1		76.6708	123.255	181.15	161.108	351.274	583.369	529.881	1055.97	469.078	846.722	1006.64	1023.82	42.4909	81.4902	85.4999	144.162	251.289	210.348		510.7	906.505	1028.92	1050.03	1203.77	1193.14	0.906094
ENSG00000147488	9705	ST18	ST18 C2H2C-type zinc finger transcription factor		158.905	284.006	188.88	33.7707	14.6904	4.40867	2.10834	3.05623	20.6573	11.1298	10.3251	25.3195	27.6909	90.7851	221.648	81.7638	14.423	14.02		6.62988	6.85725	6.1628	70.8479	34.3126	19.0091	0.906082
ENSG00000166946	23582	CCNDBP1	cyclin D1 binding protein 1		24.3994	16.4998	16.4252	23.4267	18.2532	21.4734	19.8788	48.0189	40.1262	48.394	51.0161	67.4544	25.399	27.0994	25.4203	27.5329	26.4804	28.6373		21.3246	39.795	56.8167	55.2843	76.3106	74.0824	0.906036
ENSG00000163995	84448	ABLIM2	actin binding LIM protein family member 2		3.96017	10.5677	11.9358	13.8195	20.143	36.2248	35.4637	81.0479	50.286	68.5594	103.085	126.073	3.64486	12.9143	9.65145	17.076	20.8622	12.7563		34.3947	53.7997	93.0902	59.0509	86.9438	124.959	0.905987
ENSG00000214578	---	---	---		0.856798	0.923052	0.792628	2.23566	1.9467	2.22948	1.40871	0.616936	0.812617	0.489863	0	0.444131	1.41766	2.50336	1.79348	2.77002	4.05652	3.87163		3.96886	1.75862	2.07853	1.24487	1.25582	0.980102	0.905967
ENSG00000170745	3790	KCNS3	potassium voltage-gated channel modifier subfamily S member 3		1.73742	1.56571	1.34624	2.21293	1.887	3.6711	6.98569	8.93494	8.96889	12.2828	13.1078	11.2686	4.0433	1.67447	1.14439	2.08698	0.881549	2.35282		4.64274	5.74019	13.1777	16.3469	11.1916	11.1494	0.905891
ENSG00000180611	151963	MB21D2	Mab-21 domain containing 2		13.1175	57.7387	81.7365	80.6903	86.4504	25.0942	15.5684	23.648	9.52354	21.9143	17.6623	15.5765	16.6386	20.9721	18.2197	61.3322	59.208	56.7766		18.0166	12.5653	16.9295	11.906	13.3453	14.6562	0.905826
ENSG00000249430	---	---	---		2.92301	2.1813	1.48926	2.77545	1.98426	0.989017	0	0	0	0	0	0	6.78245	1.49301	1.79116	1.89664	2.23308	2.14785		0.650009	0	0	0	0	0	0.905814
ENSG00000136485	10238	DCAF7	DDB1 and CUL4 associated factor 7		423.172	508.976	454.741	276.911	289.807	171.938	157.846	163.458	99.275	128.054	134.313	109.471	348.821	276.623	332.76	370.837	315.317	272.212		195.121	116.069	107.301	81.3738	86.1872	87.9926	0.905762
ENSG00000177084	5426	POLE	DNA polymerase epsilon, catalytic subunit		71.153	33.0998	28.661	56.781	37.0259	26.2676	10.1722	6.38779	9.42462	4.60109	7.59045	8.68756	249.594	144.199	144.89	120.283	177.958	112.08		39.132	26.2634	16.2203	20.7766	26.0552	26.5143	0.905759
ENSG00000164190	25836	NIPBL	NIPBL cohesin loading factor		113.052	136.608	116.111	76.3211	77.0411	28.8491	37.815	30.5534	29.0017	17.5693	34.6847	34.3886	230.383	125.415	144.681	148.569	140.92	137.418		67.2936	55.895	34.3291	49.4374	45.9395	46.1006	0.905741
ENSG00000136463	51204	TACO1	translational activator of cytochrome c oxidase I		16.9846	8.15942	9.97335	13.2387	11.4209	13.1254	19.0822	24.9022	33.6682	30.7639	29.3773	25.5458	13.5813	11.74	10.0283	10.7418	8.06053	10.0859		9.32114	19.9783	26.9764	24.683	27.7539	27.3187	0.905681
ENSG00000100823	328	APEX1	apurinic/apyrimidinic endodeoxyribonuclease 1		348.034	248.671	316.304	227.196	176.306	112.832	91.6851	92.4584	80.7283	89.0481	69.1947	73.328	285.91	263.713	308.759	236.653	222.45	197.413		138.037	106.349	108.302	118.223	116.96	111.578	0.90556
ENSG00000052841	55761	TTC17	tetratricopeptide repeat domain 17		53.1039	75.2048	67.7471	61.0338	63.5711	49.4005	37.5649	23.8371	20.1511	18.791	26.3579	30.5279	112.312	104.758	98.3154	91.5415	95.2084	91.2643		80.1732	62.7958	45.9596	51.8165	49.4146	53.6378	0.90554
ENSG00000120733	51780	KDM3B	lysine demethylase 3B		188.579	174.432	163.955	128.496	116.204	73.204	72.5016	59.7746	45.6443	64.0212	88.8788	79.0558	285.906	174.234	202.969	189.092	162.334	165.491		111.232	67.2014	73.817	57.1104	63.1831	79.7393	0.905515
ENSG00000100154	23331	TTC28	tetratricopeptide repeat domain 28		86.0936	313.666	289.167	305.678	313.447	41.0861	24.4567	16.9054	13.3955	8.94471	19.3976	14.9497	156.937	110.193	180.827	216.219	326.517	408.149		91.6409	19.3939	17.5551	13.5174	12.0944	16.924	0.905463
ENSG00000134072	8536	CAMK1	calcium/calmodulin dependent protein kinase I		4.36835	6.39855	7.85836	13.3554	12.7603	23.9878	26.3746	48.953	37.6071	26.28	20.7028	18.7876	10.5857	17.7799	17.8257	24.8551	42.8601	36.8104		101.283	160.144	203.027	101.468	126.618	103.209	0.905403
ENSG00000127483	50809	HP1BP3	heterochromatin protein 1 binding protein 3		255.207	310.858	295.741	192.672	201.595	131.472	116.848	81.7494	77.9329	91.7171	112.095	112.771	529.074	485.694	485.059	459.521	487.23	472.146		250.655	211.183	181.252	192.951	188.116	193.378	0.90537
ENSG00000144406	285175	UNC80	unc-80 homolog, NALCN channel complex subunit		4.98678	11.5937	7.59166	12.0158	14.0839	17.4168	41.5773	98.0636	36.0175	71.7219	100.792	150.839	9.81355	26.6956	20.9746	26.7108	25.4472	36.3287		43.2583	73.845	106.368	89.4945	136.908	211.065	0.905278
ENSG00000154358	84033	OBSCN	obscurin, cytoskeletal calmodulin and titin-interacting RhoGEF		20.9735	114.622	76.5931	220.803	136.069	48.1601	16.3747	15.8821	11.6635	12.5551	33.9671	23.577	104.278	62.1765	127.147	126.178	199.867	222.026		57.0775	20.1402	15.203	11.8425	12.6126	23.5482	0.905271
ENSG00000260822	---	---	---		14.3127	3.56563	2.70982	2.65216	3.01517	9.40404	17.1258	81.4889	30.3581	88.5792	91.436	93.257	17.4681	15.74	9.96991	7.76835	5.21461	5.902		10.3528	51.3086	63.5983	64.7974	89.5879	108.983	0.905255
ENSG00000162551	249	ALPL	alkaline phosphatase, biomineralization associated		7.12315	9.52843	6.0531	5.93904	9.63256	47.389	59.4839	83.3373	110.484	62.5749	55.4087	32.6227	41.0956	10.1017	7.80523	17.1167	7.78517	6.30082		18.015	66.6039	113.74	33.9618	48.5192	27.1828	0.905191
ENSG00000178252	11180	WDR6	WD repeat domain 6		226.297	215.583	250.402	290.117	258.468	177.704	107.411	95.0582	59.9659	62.3239	86.5968	79.3725	372.811	365.563	332.399	297.158	349.379	389.858		291.777	159.65	125.089	125.996	114.048	123.77	0.905145
ENSG00000148297	6837	MED22	mediator complex subunit 22		57.0807	44.245	41.8448	60.8649	45.2783	45.5115	37.3247	24.737	38.5698	21.6637	27.9557	26.8957	65.7285	59.7923	55.012	43.4205	54.5001	46.7448		35.7623	26.2789	34.5929	33.6847	28.7346	29.8818	0.905105
ENSG00000147118	7569	ZNF182	zinc finger protein 182		7.36326	8.41321	7.89741	6.40171	6.09017	3.23526	2.846	3.11355	1.42508	1.71092	2.72372	3.65959	10.1699	9.22342	10.8372	10.9061	11.7786	10.5932		7.94526	4.56262	3.14441	3.71994	4.49331	5.84573	0.905095
ENSG00000246528	101929759	LOC101929759	uncharacterized LOC101929759		2.8398	2.56686	2.0588	1.42196	1.92075	0.419075	0	0	0	0.504034	0	0	2.24409	5.18629	3.96849	3.1534	4.84229	3.12674		1.02306	0.707698	0	0	0	0	0.905088
ENSG00000170260	7988	ZNF212	zinc finger protein 212		30.9269	21.8144	23.0375	25.4688	20.2897	12.3208	9.25358	10.8831	11.8354	8.27253	11.909	10.8751	30.2309	28.572	30.4888	23.265	24.5064	23.1336		13.0039	10.8051	14.666	14.4867	11.4677	11.5386	0.905081
ENSG00000164305	836	CASP3	caspase 3		111.99	66.6899	77.0477	46.0803	46.343	39.7115	51.8329	21.1826	21.0786	18.3278	21.5313	12.9329	62.5797	62.9508	59.1238	61.7794	42.3111	55.7745		47.299	28.7879	29.0936	24.0733	21.5315	17.2378	0.904847
ENSG00000168758	54910	SEMA4C	semaphorin 4C		82.4558	133.965	135.867	155.802	139.775	65.0237	46.3895	30.7577	39.9929	27.5447	46.249	55.0667	103.595	122.357	126.503	122.02	150.912	131.962		74.9812	48.1366	47.732	84.2499	56.5257	55.0212	0.904841
ENSG00000108559	4927	NUP88	nucleoporin 88		81.3673	66.2421	77.7621	45.2651	44.0917	21.3393	19.3303	22.1776	19.0096	20.2518	16.8506	19.2985	71.6025	53.6179	65.2924	54.665	53.1173	47.1368		29.6776	27.83	20.6983	22.8267	24.1504	24.5204	0.904826
ENSG00000104897	8175	SF3A2	splicing factor 3a subunit 2		107.346	110.928	116.25	125.166	104.459	110.384	39.0747	27.7777	43.5156	22.1696	28.9797	25.1982	90.4592	115.143	103.9	85.6395	115.124	75.5962		72.6803	37.4685	38.9332	43.5232	31.4648	26.1705	0.904814
ENSG00000076685	22978	NT5C2	5'-nucleotidase, cytosolic II		46.0271	60.8922	56.9312	37.5343	32.5126	13.0919	16.0037	16.4634	7.02204	19.5864	18.3902	18.364	116.472	116.504	132.239	138.773	140.895	115.841		74.6747	72.6315	44.9569	60.9913	56.2555	68.2391	0.904755
ENSG00000135486	3178	HNRNPA1	heterogeneous nuclear ribonucleoprotein A1		1598.51	959.437	1349.22	794.539	810.52	340.54	241.156	177.589	193.95	176.087	177.708	169.932	2378.58	1678.93	1750.1	1374.64	1406.82	1368.23		737.399	385.245	344.662	364.236	358.953	329.843	0.904746
ENSG00000168268	64943	NT5DC2	5'-nucleotidase domain containing 2		341.542	142.384	163.244	267.492	187.999	183.504	59.3937	21.2605	31.5107	18.5134	21.6753	19.448	313.642	239.887	208.649	189.151	172.066	180.645		87.5023	21.4635	16.9017	13.4974	16.0321	18.1908	0.904714
ENSG00000178719	2907	GRINA	glutamate ionotropic receptor NMDA type subunit associated protein 1		98.1437	220.412	206.6	261.121	244.026	465.626	329.595	378.86	335.091	334.902	394.441	361.453	90.5423	119.887	140.279	191.896	206.539	163.689		292.684	322.954	342.448	276.359	290.918	332.436	0.904565
ENSG00000102043	55613	MTMR8	myotubularin related protein 8		2.40461	3.16649	3.02919	1.80921	2.32908	0.720809	0.694522	0.660009	0	0.681549	0.717508	0.561737	2.87503	1.41547	1.70791	2.12342	1.84756	1.20167		0.742452	0.407642	0	0	0	0	0.904485
ENSG00000136156	9445	ITM2B	integral membrane protein 2B		166.538	157.056	159.386	101.194	127.938	530.8	654.858	558.767	681.089	817.855	658.022	532.643	134.285	152.568	139.092	165.742	156.379	167.987		332.229	570.915	492.846	670.876	673.882	571.371	0.904458
ENSG00000107742	9806	SPOCK2	SPARC (osteonectin), cwcv and kazal like domains proteoglycan 2		22.5108	28.1811	26.9639	50.2719	96.7324	870.418	578.504	749.259	449.554	502.129	651.318	644.676	12.9395	48.9171	22.4036	87.1957	24.9635	47.9968		309.595	405.102	483.926	281.506	376.311	558.403	0.904368
ENSG00000123496	3598	IL13RA2	interleukin 13 receptor subunit alpha 2		0.907559	0.791019	1.32357	1.25721	1.60705	7.02369	3.34647	4.96489	1.45642	2.55619	2.28752	1.42706	0	1.82002	2.13128	1.91243	1.82301	1.16314		4.72339	8.28707	3.38595	2.23549	3.53746	1.86298	0.904153
ENSG00000259328	---	---	---		1.64831	1.59923	1.76573	1.77667	1.60816	0.419075	0.435709	0.403796	0	0	0	0	1.06234	1.09811	0.680081	0.895577	0.428105	0.701727		0	0	0	0	0	0	0.90415
ENSG00000173914	83759	RBM4B	RNA binding motif protein 4B		46.4413	81.4342	87.4596	76.5001	65.1645	32.6711	21.6071	15.9451	21.4502	17.576	18.9829	21.458	58.8907	95.0132	85.0929	101.442	98.3937	107.475		45.1957	37.9203	25.3085	36.1738	35.7625	29.422	0.904134
ENSG00000233452	---	---	---		0	0	0	0	0.540187	0.921965	1.19461	3.27464	1.41379	4.76139	5.59087	6.33331	0.461174	0.621385	0	0.494685	0	0.561764		0.662359	2.87046	3.48037	3.54074	7.17711	11.6213	0.904112
ENSG00000172939	9943	OXSR1	oxidative stress responsive kinase 1		108.808	119.088	113.332	67.952	71.146	46.5173	31.4463	26.1927	23.082	18.9944	31.0305	31.6868	137.772	96.7267	112.978	102.989	106.379	97.3119		64.3726	35.8637	32.376	32.5971	33.7362	36.7867	0.903886
ENSG00000189091	23450	SF3B3	splicing factor 3b subunit 3		316.945	276.382	315.114	206.664	200.603	133.182	91.8239	114.056	53.7544	76.6905	94.7351	104.06	401.184	221.921	288.952	255.343	244.844	200.784		146.007	89.6435	87.0442	81.5461	87.6836	97.237	0.903823
ENSG00000197291	100190938	RAMP2-AS1	RAMP2 antisense RNA 1		0.712077	1.55219	0.99699	3.14087	3.73961	4.27456	2.20751	1.16514	0.528685	0	0.601322	0.888182	3.18759	3.58873	2.86226	5.09859	9.49134	8.23411		5.77438	2.92053	1.97667	1.38502	1.3457	1.31222	0.903818
ENSG00000167554	162963	ZNF610	zinc finger protein 610		15.25	13.4177	14.1956	10.3789	8.71448	7.52658	7.691	6.24149	4.6817	6.98063	6.06037	4.85223	19.7253	17.2459	18.5062	17.965	17.5922	15.0362		10.3208	9.37934	6.40095	5.88242	7.4965	7.4468	0.903815
ENSG00000183655	64410	KLHL25	kelch like family member 25		73.4374	79.6007	83.5828	101.967	68.0802	45.3439	37.3887	38.5174	25.6802	15.7118	17.4667	14.3673	37.0573	63.567	85.2348	62.356	80.363	66.7069		66.1935	35.6165	25.4824	13.8085	14.4378	15.108	0.903804
ENSG00000125454	60386	SLC25A19	solute carrier family 25 member 19		2.89074	2.41483	3.10937	4.16424	4.05839	5.78323	5.54258	7.29676	5.17721	3.96961	5.20521	5.28301	5.91284	4.83143	5.62466	5.60468	5.86901	6.45046		12.1994	16.5876	11.1249	11.572	13.0917	11.8512	0.903695
ENSG00000102317	5935	RBM3	RNA binding motif protein 3		172.429	177.604	206.025	115.474	125.84	40.1809	62.5031	59.933	51.5402	63.9933	53.1591	43.1609	176.996	137.902	186.62	143.365	119.147	145.71		82.9652	38.9017	47.1368	56.3765	54.1553	61.9799	0.903656
ENSG00000268297	---	---	---		0	0	0	0.513029	0.641566	2.96705	2.27227	0.953354	0.978107	0.815915	1.36709	1.31728	0	0	0	0.558531	0	0		4.36243	1.12025	2.57025	1.33799	2.02662	2.92135	0.903538
ENSG00000087995	339175	METTL2A	methyltransferase like 2A		17.3456	16.9637	17.4168	16.0757	14.7844	9.70577	12.8346	12.0224	12.6646	10.1375	8.87728	10.2188	17.9132	11.6666	14.7956	15.0149	15.6064	12.9651		10.4016	9.23004	9.48215	7.1304	7.9326	8.35183	0.903451
ENSG00000214655	23053	ZSWIM8	zinc finger SWIM-type containing 8		36.1702	76.8052	70.8147	82.3996	66.4291	54.3624	36.0352	35.8638	25.4695	32.0059	34.7317	44.6705	90.4828	130.086	139.243	155.193	175.381	144.341		114.214	96.8469	77.7783	98.7373	89.125	105.264	0.903441
ENSG00000204764	64901	RANBP17	RAN binding protein 17		7.73056	4.43589	4.78339	6.72643	7.44845	6.05144	4.32951	2.84513	2.26697	2.6572	1.94499	2.28633	34.0621	23.5107	14.1703	13.3981	15.2631	13.2971		10.0529	7.21343	5.10696	7.04782	5.0241	5.09962	0.903412
ENSG00000273403	---	---	---		0	0	0	0	0	0.519653	1.02266	0.836619	0.520116	0	0	0	0	0	0	0.420463	0	0		1.0974	0.95264	0.61593	0	0.499974	0	0.903376
ENSG00000178458	---	---	---		30.7607	19.7329	23.4405	18.9501	12.2738	5.28034	3.62404	2.96807	5.33407	2.99428	2.20084	1.57301	4.57479	4.82818	5.10573	5.43751	2.6338	3.50441		1.90348	1.49771	0.730472	0.655978	0.707135	0.718949	0.903371
ENSG00000184113	7122	CLDN5	claudin 5		64.8659	61.3624	55.6029	64.0221	55.1511	576.06	194.96	87.0475	180.486	78.2136	71.0823	46.7649	5.43994	26.0049	30.9552	17.9367	22.6009	27.5137		52.8147	41.5332	72.9651	35.7566	24.4395	19.0595	0.903357
ENSG00000253305	56100	PCDHGB6	protocadherin gamma subfamily B, 6		15.5606	26.6896	25.0882	19.1601	13.8481	21.9763	12.4873	5.61126	3.92266	5.33725	6.3696	3.20955	11.3873	11.8215	14.1627	17.48	18.4931	13.8996		10.3144	3.67005	0.935828	0.497417	0.883313	2.27691	0.903352
ENSG00000197177	84435	ADGRA1	adhesion G protein-coupled receptor A1		14.0054	4.73297	4.68513	19.7733	22.72	34.7832	67.6623	73.3417	61.0342	74.6743	113.537	99.9622	7.57942	25.8019	12.372	14.6762	13.7783	17.5664		35.6907	56.1923	67.0159	51.7159	67.243	90.0281	0.903349
ENSG00000183888	149563	SRARP	steroid receptor associated and regulated protein		0.722029	0.736352	0.824819	0.764561	0.708318	9.37051	2.54681	2.64162	3.15002	1.10692	2.19741	1.22986	0	1.3473	2.84423	1.97991	2.42304	3.53492		6.14622	6.43658	11.1277	3.86706	5.09035	5.00178	0.903259
ENSG00000262454	---	---	---		0	0	0	0	0.452977	1.52543	0.993767	1.45465	2.1235	2.3706	1.97265	1.48076	0	0	0	0	0	0		0.683426	0.725295	1.22402	0.740545	0.952246	1.13543	0.903257
ENSG00000129933	23383	MAU2	MAU2 sister chromatid cohesion factor		60.5895	79.7469	62.4027	87.2652	70.2183	56.6422	39.8073	25.0525	29.7649	23.6944	34.9089	44.4879	93.6902	102.494	99.8154	98.5098	119.541	108.784		78.8921	51.4302	47.9999	70.1211	52.7212	58.7558	0.903255
ENSG00000147862	4781	NFIB	nuclear factor I B		914.448	2006.76	1436.17	360.592	226.205	95.13	124.729	89.4617	118.394	74.619	122.398	69.2321	23.5252	307.239	1283.77	730.982	623.685	404.785		135.829	66.5167	97.0261	87.9524	74.2554	67.5575	0.903255
ENSG00000163568	9447	AIM2	absent in melanoma 2		4.68799	3.44046	4.68667	3.47818	4.5341	1.49191	0.82492	0.472888	0.463592	0.41059	0	0	5.87315	5.95392	5.2079	3.74798	5.08976	4.15181		2.59781	1.5836	1.00521	0	0	0	0.903252
ENSG00000226086	---	---	---		3.31878	2.61276	4.16109	5.20337	2.35047	2.263	1.08984	1.1213	0.76404	1.03143	0.87724	0.786642	4.42137	2.88229	3.9862	4.26712	5.07101	3.17924		2.69734	1.14737	0.934341	0.515129	1.0435	1.207	0.903177
ENSG00000078401	1906	EDN1	endothelin 1		1.92236	1.8802	2.76009	1.70008	2.03616	24.2561	9.86457	4.29563	5.87044	2.54857	4.09776	4.34241	2.23946	7.00232	8.99554	4.99805	6.43596	6.05553		23.5096	10.6923	11.8611	3.77488	5.87024	9.29848	0.90317
ENSG00000161682	284069	FAM171A2	family with sequence similarity 171 member A2		254.093	329.295	283.818	374.371	306.276	513.501	128.761	163	84.7293	71.7906	117.099	94.5276	57.8974	142.393	132.964	129.064	171.644	113.738		102.229	45.9246	54.4182	25.8158	33.5763	39.1062	0.90313
ENSG00000260432	---	---	---		0	1.42641	1.23698	4.24071	6.44884	16.411	52.4099	101.22	40.7074	68.8619	108.878	94.9095	1.68573	3.00271	1.79074	11.1384	4.98481	10.8654		32.881	97.8239	105.852	81.7743	112.297	119.3	0.903121
ENSG00000144550	151835	CPNE9	copine family member 9		0	0	0	0.428964	0.909469	1.39133	13.2645	45.7372	28.8152	47.8057	37.8147	46.961	0.733254	1.33601	0.449165	1.95861	0.473576	0.451558		2.80982	26.8964	41.8849	45.0517	56.7295	60.2905	0.903106
ENSG00000103160	83693	HSDL1	hydroxysteroid dehydrogenase like 1		171.212	277.735	284.339	171.25	199.408	93.9901	47.8811	41.4078	27.1517	42.004	51.7964	60.6257	123.204	145.958	160.236	209.115	210.223	186.301		81.3518	45.7499	30.543	31.0196	46.4015	60.2101	0.902978
ENSG00000112739	8899	PRPF4B	pre-mRNA processing factor 4B		118.223	104.585	100.434	65.7638	74.508	31.0954	43.6617	51.0541	38.2932	32.0002	46.8686	47.0842	211.673	132.988	127.137	118.751	106.308	129.577		79.402	66.881	42.2623	56.7929	63.5481	60.8368	0.902965
ENSG00000168824	27065	NSG1	neuronal vesicle trafficking associated 1		296.007	755.259	930.361	659.939	701.906	336.115	67.9368	89.3083	35.0732	74.2265	88.0186	121.546	86.8005	357.526	364.985	599.152	499.084	390.146		268.742	90.0907	95.2508	69.3984	92.6925	147.846	0.902936
ENSG00000255085	---	---	---		7.33521	11.0631	13.6525	11.8045	13.7477	3.0341	2.38845	0.722649	1.57287	0.978888	1.47431	1.08839	5.90597	5.5523	8.72382	10.3707	14.908	14.9571		7.72453	1.41323	1.16159	1.34579	0.881052	1.28589	0.902887
ENSG00000105426	5802	PTPRS	protein tyrosine phosphatase receptor type S		497.153	842.813	802.516	851.536	682.824	521.916	333.056	364.168	253.771	204.408	369.075	301.336	539.007	665.801	707.372	600.105	803.203	628.621		346.022	231.944	293.865	211.762	202.886	216.091	0.902798
ENSG00000036530	10858	CYP46A1	cytochrome P450 family 46 subfamily A member 1		1.43167	2.75464	3.25494	7.52872	11.7643	70.9578	93.3558	178.914	155.061	123.689	185.243	161.489	3.39149	5.29236	2.97335	7.78882	7.10629	5.22629		30.7232	114.494	185.571	87.8265	109.128	122.784	0.902773
ENSG00000158716	54935	DUSP23	dual specificity phosphatase 23		6.96811	10.1768	11.4068	18.97	23.9972	76.389	56.9109	29.7252	27.7069	19.5105	12.3044	9.68529	3.32349	3.8978	4.31193	5.39188	8.6158	7.90208		33.4061	24.6372	23.2245	15.769	12.0374	7.61655	0.902726
ENSG00000178966	80010	RMI1	RecQ mediated genome instability 1		55.6274	30.7403	31.5012	14.6351	14.3842	7.22485	5.88864	3.00941	3.56469	4.35585	5.56743	5.09948	68.0765	40.4453	37.1803	31.8316	25.4007	27.1188		9.00497	5.24438	4.12576	5.20422	4.5635	5.59694	0.902612
ENSG00000164934	25879	DCAF13	DDB1 and CUL4 associated factor 13		60.1189	47.3625	53.7377	33.4151	30.3323	20.7358	20.8363	14.057	16.6186	14.6418	14.2962	14.7716	72.2086	48.9703	53.9786	47.4884	40.461	44.0888		28.2914	29.3205	18.8698	22.6515	22.3355	17.5655	0.902603
ENSG00000010438	5646	PRSS3	serine protease 3		0	0	0	0	0	2.06185	2.51443	12.865	35.0344	26.025	26.576	32.5387	0	0	0	0.82345	0	0.415123		1.80113	18.1296	17.6297	13.9357	27.2162	30.2419	0.902564
ENSG00000182318	342945	ZSCAN22	zinc finger and SCAN domain containing 22		2.08465	4.81388	3.8048	6.92729	5.11101	4.17399	2.95623	1.79922	2.6576	0.930698	2.85429	3.16287	3.1878	3.44339	4.89884	4.10707	7.13628	4.843		3.02326	2.98519	1.76945	1.87051	2.37631	2.54776	0.902516
ENSG00000260949	---	---	---		0	0.473036	0	0.749128	0.430043	0	0	0	0	0	0	0	0	0.96709	1.1452	0.672179	3.42559	1.97846		0.746832	0	0	0	0	0	0.902507
ENSG00000041802	55341	LSG1	large 60S subunit nuclear export GTPase 1		28.0644	31.3403	36.9093	27.3029	25.7375	17.4503	17.6112	17.3627	9.72475	11.7631	16.7264	21.6495	44.7849	26.0825	35.9099	36.7135	37.464	32.9418		27.2159	19.4355	11.3337	11.5682	17.4574	21.7279	0.902408
ENSG00000242173	398	ARHGDIG	Rho GDP dissociation inhibitor gamma		4.2571	17.7315	24.7887	49.8749	62.4322	184.946	237.915	350.603	515.478	350.389	266.723	185.515	1.60562	14.4457	10.1838	18.4019	22.3608	24.109		89.4324	136.554	280.575	152.867	220.24	174.964	0.902399
ENSG00000196460	731220	RFX8	RFX family member 8, lacking RFX DNA binding domain		0	0	0	0	0	0.821387	0.776421	1.0577	0.48028	1.18719	1.1742	1.16771	0.803163	0.78708	0.474069	0	0	0.485639		0.919794	1.92704	1.24893	1.63386	1.67228	2.3998	0.902387
ENSG00000161381	57125	PLXDC1	plexin domain containing 1		5.51925	7.28866	6.31131	9.96868	13.9961	28.078	26.2666	24.8896	24.4204	25.3577	28.9487	29.0827	2.06681	15.199	14.543	18.6329	10.8936	26.3883		33.4804	33.4355	44.671	28.4931	40.3969	41.0809	0.902377
ENSG00000197062	7741	ZSCAN26	zinc finger and SCAN domain containing 26		27.2624	30.6126	32.7581	30.8314	27.703	21.6075	12.4114	13.1231	10.5576	12.8304	11.1945	13.1896	27.4036	36.807	36.8158	39.1569	46.5335	42.8997		30.8717	20.7614	13.6632	13.9897	18.3986	19.1353	0.902309
ENSG00000148840	23082	PPRC1	PPARG related coactivator 1		28.2434	47.4371	36.7133	49.7751	44.6189	28.5139	23.033	17.9906	13.1463	17.8337	25.5655	28.6947	84.415	52.1575	62.5669	55.2996	70.7324	56.9224		40.0395	26.9163	22.9112	23.271	22.9889	27.626	0.902282
ENSG00000112759	2030	SLC29A1	solute carrier family 29 member 1 (Augustine blood group)		15.5826	8.22448	9.1111	10.6347	18.5898	43.0306	27.384	26.9491	30.5865	38.4835	33.7601	43.6057	45.9113	19.3806	12.8688	18.5146	27.462	16.0638		44.3363	34.9063	49.2551	42.0249	48.357	56.3017	0.902231
ENSG00000138135	9023	CH25H	cholesterol 25-hydroxylase		0	0	0	0	0	7.45953	0.776433	0.469487	1.91781	3.8419	2.16673	1.09541	0	0	0	0.460787	0	0.544542		4.17214	2.1104	3.89579	5.95757	3.48381	2.3769	0.902197
ENSG00000167470	90007	MIDN	midnolin		192.607	297.514	260.695	267.807	187.627	105.557	73.2347	56.17	60.0225	49.0121	59.8652	32.5704	183.052	220.918	198.404	152.157	183.208	156.296		82.5495	82.9131	50.5426	35.1871	32.5973	31.6533	0.902154
ENSG00000243422	---	---	---		0.453854	0	0	0.679444	0.449901	1.96127	1.57764	2.00236	1.67124	2.11354	2.54245	2.41819	0.852081	0.644657	0.467415	0	0.473579	0		1.66742	2.19594	4.02305	3.05992	3.35472	4.13367	0.902058
ENSG00000187908	1755	DMBT1	deleted in malignant brain tumors 1		0	0	0	0	0	0	0	0	0	2.34398	0	0.767249	0	0	0	0	0	0		0	0	0	1.19251	0.551577	0.607	0.901919
ENSG00000141622	494470	RNF165	ring finger protein 165		109.837	152.295	139.24	152.151	152.009	76.0202	58.9785	84.4212	34.8612	51.1849	56.6283	46.7973	104.701	160.115	151.789	166.619	192.812	172.032		99.7213	70.2672	82.2776	34.7296	48.1365	49.6113	0.901843
ENSG00000100226	9567	GTPBP1	GTP binding protein 1		138.042	149.51	163.156	143.131	147.311	111.357	55.2521	50.5703	39.6136	51.4768	53.8347	52.9871	107.159	91.0575	113.958	114.822	118.803	91.4667		86.1455	37.9698	41.654	41.4872	36.3943	42.7828	0.90182
ENSG00000187688	51393	TRPV2	transient receptor potential cation channel subfamily V member 2		0.961821	0.949448	0.727792	0.699982	1.22623	22.7474	9.58735	24.8643	11.3099	8.92574	14.4202	13.7051	0.470103	0.826138	1.00692	1.25433	0.965316	0.883484		5.13452	11.8238	12.6642	5.86365	9.11926	9.52117	0.901805
ENSG00000267041	342892	ZNF850	zinc finger protein 850		4.09533	3.48957	2.47851	2.91193	1.95036	0.687283	1.23428	0	0	1.20316	0.607284	0.528986	18.2046	5.54847	5.8726	5.42404	5.8142	5.20768		3.21091	1.39986	0.664893	0.96038	0.929748	0.651896	0.901798
ENSG00000088320	28954	REM1	RRAD and GEM like GTPase 1		0	0	0	0	0	0.921965	0.670329	0.409728	1.4072	0.491422	0.670199	0.815158	0	0	0	0	0	0		0	0.42122	1.41252	0.471581	0.797206	0.817976	0.901755
ENSG00000074319	7251	TSG101	tumor susceptibility 101		88.2735	102.808	124.311	91.0959	88.3572	77.4283	58.7261	50.8781	61.6658	53.0765	48.9716	49.3554	55.1681	91.276	101.152	100.919	98.0217	91.1291		86.1142	71.3509	66.6545	65.1605	71.3267	64.9278	0.901755
ENSG00000125898	83541	FAM110A	family with sequence similarity 110 member A		29.6502	34.4516	32.5631	38.0518	28.2369	27.8769	7.39686	4.38286	5.19774	3.69255	4.91548	3.64813	12.7194	23.9486	21.3287	17.1569	26.587	20.2874		17.4734	5.3544	5.0251	2.75867	2.76381	2.33185	0.901754
ENSG00000136883	113220	KIF12	kinesin family member 12		0.479193	0	0	0	0	5.28034	7.66236	10.7714	10.4219	5.48331	5.35074	3.49658	0.545313	1.90256	1.29544	2.12022	0.842933	0.645397		4.23178	9.35162	13.8478	5.00924	5.91213	5.25799	0.901711
ENSG00000178031	92949	ADAMTSL1	ADAMTS like 1		2.13758	58.6078	47.2467	21.972	16.8237	10.7451	5.08206	8.74702	1.38717	3.21402	2.93619	4.23329	8.50027	10.3618	24.7047	24.063	10.1882	12.723		13.1072	6.28887	2.95852	2.01593	3.18564	3.08936	0.901711
ENSG00000160932	4061	LY6E	lymphocyte antigen 6 family member E		55.8499	64.3399	77.5325	85.6042	69.0742	194.4	191.032	264.983	301.359	179.086	211.546	190.587	28.2415	24.0898	42.4876	31.6734	49.5456	32.6381		82.6614	117.366	204.204	116.642	163.128	167.106	0.90169
ENSG00000154589	23643	LY96	lymphocyte antigen 96		0	0	0	0	0	1.89422	1.04713	1.04191	1.33279	0.961154	0.741782	0.915982	0	0	0	0	0	0		1.37638	2.58716	1.50084	1.43157	1.63539	1.24809	0.901663
ENSG00000122873	55847	CISD1	CDGSH iron sulfur domain 1		31.8269	26.7439	31.606	20.2782	23.659	39.0075	51.4965	67.754	63.3559	56.2946	59.2641	59.9502	15.9804	24.4656	20.5143	24.9966	19.3827	20.4527		29.7937	71.3283	68.8787	61.1877	86.5633	80.172	0.90162
ENSG00000159733	57732	ZFYVE28	zinc finger FYVE-type containing 28		1.81045	4.76979	4.08313	7.02372	6.99788	23.0156	19.7447	31.4423	27.1643	23.8612	46.7469	38.0735	1.02768	3.32091	4.56404	4.3406	7.7858	6.28378		21.9865	39.6112	37.8178	26.0777	30.0807	40.1643	0.901618
ENSG00000185043	10519	CIB1	calcium and integrin binding 1		11.2326	3.44622	4.68051	9.89409	8.56858	34.0456	41.7443	34.4085	50.2638	36.9061	38.9236	27.9306	9.91502	9.7275	7.98411	8.26048	5.13251	9.53094		22.382	38.8361	58.693	45.6636	48.8301	37.2188	0.901613
ENSG00000133805	272	AMPD3	adenosine monophosphate deaminase 3		1.0213	0.863731	0.485222	1.1029	1.01171	5.34739	6.02189	4.7455	8.85066	13.4584	12.5676	15.0928	2.81646	0.838341	1.10313	1.63213	0	1.9971		5.46446	14.03	13.5892	31.9888	20.7442	17.9659	0.901502
ENSG00000123552	85015	USP45	ubiquitin specific peptidase 45		3.36005	2.21431	1.25859	0.808256	1.06211	1.52543	3.3492	3.28448	2.70075	4.66801	5.20839	5.822	13.0879	8.47478	5.4711	3.53465	2.44259	3.60955		4.92725	9.35459	5.50531	10.0587	9.6326	9.70929	0.90141
ENSG00000136448	4836	NMT1	N-myristoyltransferase 1		79.7723	80.2274	74.0236	82.2656	77.919	108.708	91.6863	171.089	103.925	137.666	181.522	210.975	121.771	78.005	87.9465	84.7189	91.411	83.7633		114.307	172.327	176.544	137.662	174.035	214.835	0.901356
ENSG00000172216	1051	CEBPB	CCAAT enhancer binding protein beta		4.57638	1.80367	2.49188	3.25145	3.69198	28.1451	13.0277	20.4248	23.5113	17.0869	24.1386	16.7489	0.92335	1.01014	1.37572	1.02598	1.3713	1.32066		17.192	30.0986	25.4343	11.6152	16.8847	14.745	0.901317
ENSG00000170734	5429	POLH	DNA polymerase eta		7.53879	8.4482	5.43722	8.76304	6.64511	6.55433	4.05208	3.68374	3.2119	2.87184	3.57403	4.18979	13.6681	8.50142	12.9337	11.1164	12.4849	10.9942		7.04107	4.94266	2.05733	3.07308	3.45177	4.3828	0.90129
ENSG00000120729	9499	MYOT	myotilin		0	0.621728	0.528638	0.662874	0.584168	0	1.00555	0.744415	1.41591	2.23443	2.37089	2.48968	0	0	0	0	0	0		0	0.506949	1.74695	4.15689	2.46344	2.59859	0.901246
ENSG00000112282	9439	MED23	mediator complex subunit 23		34.1462	40.7445	35.7759	30.751	32.7367	15.8075	17.8108	14.1066	9.0916	12.3866	15.4899	18.7927	68.3057	57.9984	52.402	56.6409	66.9046	62.2015		36.2876	32.8011	20.22	25.5301	27.9768	29.8163	0.901235
ENSG00000183386	2275	FHL3	four and a half LIM domains 3		12.1527	15.345	11.9937	17.5283	18.2478	49.0653	25.1053	15.5204	20.3149	10.3214	14.2753	11.5401	15.278	9.88192	10.6498	11.6026	16.8845	13.2159		19.6697	13.5822	17.5659	8.94061	9.37822	10.7983	0.901226
ENSG00000131408	7376	NR1H2	nuclear receptor subfamily 1 group H member 2		33.9797	22.7055	25.0857	28.358	20.5641	71.7624	59.9234	59.536	90.7023	65.2893	82.6571	78.235	17.3851	21.1971	21.2414	21.4335	20.2302	19.4648		30.2067	50.2417	65.5704	74.3823	62.2124	63.8951	0.90121
ENSG00000121905	3208	HPCA	hippocalcin		38.3364	42.9653	42.0259	48.4098	132.864	562.181	347.047	521.159	496.306	535.753	452.413	326.642	2.33989	19.8429	36.8535	31.9973	47.4604	30.668		268.608	470.128	562.89	259.802	408.459	388.252	0.901191
ENSG00000204576	80742	PRR3	proline rich 3		36.1402	68.6499	58.56	54.1281	44.8317	46.9867	25.7991	28.5346	18.6901	16.9962	21.8791	22.962	44.9732	52.9478	62.3949	67.6029	74.1101	59.8089		47.5245	39.2177	38.3815	28.4407	34.0395	31.9462	0.901175
ENSG00000226852	---	---	---		0	0	0	0	0	0.653757	1.46108	1.24708	2.74107	0.800306	2.88377	2.17429	0	0	0	0	0	0		1.13003	3.82821	5.82358	2.55361	4.21649	6.12539	0.901151
ENSG00000005882	5164	PDK2	pyruvate dehydrogenase kinase 2		28.5073	29.9424	28.7963	30.1172	20.7948	45.1763	41.3007	57.5836	58.8472	70.5956	78.174	82.3344	28.9813	32.7445	44.5244	39.894	33.7869	35.6278		43.0186	68.8404	125.122	87.0932	104.29	127.198	0.901137
ENSG00000228058	101927532	LINC01736	long intergenic non-protein coding RNA 1736		0	0	0	0	0	0.553179	1.20918	1.42857	2.05295	2.88153	0.78654	1.14112	0	0	0	0	0	0		0.455927	1.74652	4.34706	4.32845	2.58091	1.47003	0.900983
ENSG00000167552	7846	TUBA1A	tubulin alpha 1a		5422.67	7715.63	11471.4	9352.93	10942.4	7397.76	2286.72	3088.6	2112.87	1514.27	1028.38	975.223	2095.94	5936.93	6166.83	6543.47	8384.24	7216.44		4364.68	1695.64	1889.24	2111.65	1746.78	1075.14	0.900935
ENSG00000129158	26297	SERGEF	secretion regulating guanine nucleotide exchange factor		15.6829	14.7735	22.5287	21.9395	20.9184	34.1127	42.0984	57.2744	57.1504	41.2168	48.5713	40.4597	8.56981	13.6124	16.5968	13.6268	15.893	17.823		27.3826	44.8126	61.0887	44.0136	47.2091	52.4712	0.900906
ENSG00000163075	200373	CFAP221	cilia and flagella associated protein 221		0	0.778544	1.2899	2.25607	3.57586	3.90578	6.94784	11.331	7.12873	10.7757	10.7674	10.9446	3.59114	1.72752	0.590383	2.84086	1.35421	1.77221		7.04982	12.3639	9.99284	8.20958	11.1087	17.4052	0.900884
ENSG00000131653	84231	TRAF7	TNF receptor associated factor 7		168.805	131.78	136.419	150.216	111.603	103.243	75.5141	64.7962	54.3685	34.5651	50.1366	48.4178	130.959	105.408	134.784	114.441	155.255	101.118		88.5845	58.7735	54.0438	42.1251	47.6896	50.1901	0.900879
ENSG00000159917	9310	ZNF235	zinc finger protein 235		7.09113	10.0445	8.33876	9.01438	7.94766	3.40289	5.37309	4.93282	3.67796	2.76633	2.92499	3.56565	11.0713	10.905	12.0562	13.0631	15.5172	14.6423		9.9144	8.05611	5.53108	7.00852	7.123	6.93369	0.900858
ENSG00000135372	55226	NAT10	N-acetyltransferase 10		65.7161	60.1666	58.8958	50.5588	51.1349	55.2005	31.3231	35.8807	26.4304	30.3685	39.5577	41.3119	100.946	65.3721	71.4983	61.2899	61.6737	57.039		49.6302	41.011	36.2993	34.8417	43.2842	57.2996	0.90085
ENSG00000092850	27285	TEKT2	tektin 2		9.77461	6.94626	7.41818	15.9817	13.5758	8.73352	3.29673	0.939079	1.9733	0.649213	1.02123	1.17487	18.2588	25.1502	20.3106	14.7552	25.6211	18.6358		10.6623	7.32513	3.14022	2.67289	2.30599	2.34186	0.900828
ENSG00000185825	10134	BCAP31	B cell receptor associated protein 31		78.2582	63.1347	82.8843	77.6064	82.2617	157.22	143.544	177.906	204.116	247.51	180.65	190.251	63.3309	61.026	59.0445	66.4141	65.2648	56.9385		89.1827	134.481	162.876	149.978	171.368	190.505	0.900789
ENSG00000075035	9671	WSCD2	WSC domain containing 2		5.76058	3.87412	3.77856	2.75662	4.23303	25.6641	24.7707	49.8976	27.0823	40.5651	61.1585	70.8866	2.05855	9.496	13.8372	5.5315	5.14697	3.45986		18.5758	48.9797	54.2652	36.3164	45.5409	62.9026	0.900617
ENSG00000170899	2941	GSTA4	glutathione S-transferase alpha 4		147.325	174.959	180.89	112.506	110.644	98.5832	77.0209	60.4594	51.3972	54.1945	55.852	55.0026	87.6762	225.288	203.115	212.478	210.716	191.983		142.112	74.9814	69.6093	76.81	94.4068	99.9845	0.900562
ENSG00000178342	26251	KCNG2	potassium voltage-gated channel modifier subfamily G member 2		0.588604	0.993873	0.751756	1.11171	0	1.79364	2.062	3.46763	4.19487	3.96535	4.28459	2.75025	0	0	0	0	0	0		0	0.483869	1.15838	0.60713	0.732934	0.46002	0.900559
ENSG00000178187	285676	ZNF454	zinc finger protein 454		6.38992	9.93291	10.0659	8.29372	6.79371	3.36936	2.51601	3.0164	2.23206	1.77888	2.40387	2.83315	10.6039	6.7681	10.4678	7.98127	12.6028	10.1203		3.51981	3.09294	1.58916	1.59028	1.90307	2.92293	0.900558
ENSG00000183496	84206	MEX3B	mex-3 RNA binding family member B		104.505	164.278	144.911	170.403	124.158	36.9624	18.7431	21.9432	7.04528	9.73304	9.89218	5.55277	72.4811	95.7438	97.4166	90.5393	148.868	150.193		60.0325	13.2971	8.97797	5.139	5.5538	4.85366	0.900358
ENSG00000008083	3720	JARID2	jumonji and AT-rich interaction domain containing 2		59.2016	42.3171	43.888	50.5307	44.5561	24.0214	26.4225	17.7776	15.4322	14.1493	22.668	19.7355	109.398	78.3541	62.2801	64.741	54.246	57.9086		48.0527	45.6622	19.9005	26.1808	25.4576	29.7532	0.900349
ENSG00000114626	80325	ABTB1	ankyrin repeat and BTB domain containing 1		16.5941	17.4288	16.6108	26.8007	18.7975	27.2063	31.9217	52.9951	61.3082	55.363	75.6411	88.8967	9.06652	19.0367	35.2782	19.3377	20.0973	31.7659		23.4086	40.3192	65.7681	92.7903	88.8472	99.1653	0.900349
ENSG00000124422	23326	USP22	ubiquitin specific peptidase 22		489.564	696.94	659.088	565.845	503.001	293.067	248.521	286.605	149.293	222.914	303.35	342.844	637.753	592.147	648.508	767.735	704.996	641.992		397.195	298.55	369.978	238.41	279.66	383.928	0.900327
ENSG00000150347	84159	ARID5B	AT-rich interaction domain 5B		20.3979	10.8882	11.1588	14.7033	23.3052	60.1289	37.9302	40.8399	30.9455	39.3119	52.0855	50.9741	28.3584	21.3254	9.94118	18.7664	15.215	21.6305		48.3721	55.9526	36.4599	40.938	40.1182	53.8758	0.900304
ENSG00000064547	9170	LPAR2	lysophosphatidic acid receptor 2		53.0206	43.6403	42.3097	105.47	75.0531	28.0445	7.0784	2.94989	3.23417	1.85437	2.2133	2.24066	87.0233	175.585	124.149	103.105	151.093	162.831		49.699	11.614	7.42376	6.25724	5.1294	5.2667	0.90023
ENSG00000204653	554235	ASPDH	aspartate dehydrogenase domain containing		8.2595	3.1079	3.96881	3.43716	1.60599	1.55896	8.63031	13.5859	40.3611	34.5334	27.0403	22.5693	0	4.02403	4.84176	4.25431	1.38265	1.4881		1.93344	12.4791	23.603	32.5239	31.9271	27.3304	0.900225
ENSG00000186998	129080	EMID1	EMI domain containing 1		28.743	45.681	49.9147	89.2829	94.0924	145.184	142.148	50.2849	94.5329	26.048	46.0709	20.8921	26.4411	19.9648	36.6972	31.0704	72.9309	71.158		70.7446	40.1959	58.1892	30.5784	24.1887	24.9267	0.899994
ENSG00000136866	7539	ZFP37	ZFP37 zinc finger protein		16.6937	26.9621	27.3601	22.014	20.4142	4.24104	5.1177	5.52708	3.24615	3.69179	3.92544	3.88056	16.5789	22.6082	22.6224	27.6464	36.1597	31.6504		11.7812	7.33269	4.27972	5.08739	4.57007	4.42487	0.899968
ENSG00000075711	1739	DLG1	discs large MAGUK scaffold protein 1		65.7786	42.7947	42.5126	29.1601	29.8197	51.5462	97.8854	165.094	84.3089	133.603	126.201	130.225	114.118	54.484	58.5878	53.1818	53.6442	53.3325		70.1711	132.896	112.163	150.426	139.611	127.019	0.899959
ENSG00000196810	---	---	---		15.9981	23.9606	18.6821	22.7961	16.9436	20.9035	11.1177	7.56739	8.46913	8.21457	11.8652	11.5666	22.7192	19.8396	25.0024	28.8319	29.518	25.7326		18.5868	12.4451	12.3411	14.6337	13.8773	14.0789	0.899926
ENSG00000139287	121278	TPH2	tryptophan hydroxylase 2		0	0	0	0	0	0	0	0.966534	0	1.43112	0.663644	1.25747	0	0	0	0	0	0		0	0.478726	0	0.422892	0.490829	0.914062	0.899908
ENSG00000166025	154810	AMOTL1	angiomotin like 1		101.659	164.049	131.519	88.354	61.7898	35.5208	39.8172	34.7053	24.7238	37.8284	39.1067	39.4159	184.839	86.7574	136.552	128.508	84.5661	109.081		52.2642	43.2385	35.3311	21.7337	27.7929	31.1605	0.899883
ENSG00000135316	10492	SYNCRIP	synaptotagmin binding cytoplasmic RNA interacting protein		300.22	252.808	239.169	125.64	147.279	59.4248	84.3882	76.0194	69.7062	56.0113	83.7004	66.8372	355.805	240.937	241.588	229.891	205.464	211.172		96.5281	87.6978	54.0915	62.1228	69.6725	69.5977	0.899857
ENSG00000235194	90673	PPP1R3E	protein phosphatase 1 regulatory subunit 3E		3.59058	3.93056	3.26205	7.20133	6.6084	14.2318	9.39411	10.7611	13.2659	16.6089	20.3595	29.3367	12.0934	21.2887	14.1039	19.5202	24.0474	18.7718		18.1923	31.7093	36.3209	64.8577	57.8615	62.7314	0.899807
ENSG00000038358	23644	EDC4	enhancer of mRNA decapping 4		55.6111	89.4529	81.572	100.645	77.6188	64.6549	38.4729	54.8362	21.0677	27.6551	42.5766	52.1886	80.1302	66.4272	75.4848	80.2492	85.6902	72.1022		58.0531	40.4344	28.0049	25.8393	32.4933	43.0678	0.899768
ENSG00000166529	7589	ZSCAN21	zinc finger and SCAN domain containing 21		9.86026	12.2759	12.9689	12.3715	9.30302	9.63872	4.32305	3.88057	3.15599	3.06607	4.34296	4.35018	21.3783	25.0532	30.9376	27.2136	30.4038	27.4188		23.5549	13.2306	12.8381	17.091	14.7617	13.6479	0.899713
ENSG00000273350	---	---	---		0	0	0	0	0	0	0.545414	0.772396	0.944602	0.770429	0.409951	0.595886	0	0	0	0	0	0		0.556904	1.72508	1.22575	0.816257	1.00322	0.778702	0.899706
ENSG00000114982	55683	KANSL3	KAT8 regulatory NSL complex subunit 3		119.458	102.554	85.6341	91.9066	77.845	61.7716	56.6496	60.2796	43.0628	38.5871	65.3589	61.4135	164.485	127.105	129.09	124.883	113.888	118.086		88.1815	76.9468	66.9528	60.3226	67.1526	78.152	0.899679
ENSG00000126861	4974	OMG	oligodendrocyte myelin glycoprotein		0.536048	8.1923	6.59707	4.79004	6.56587	41.4884	74.3652	98.9928	86.8109	105.525	103.997	127.453	0	2.08569	3.51332	8.62174	7.23784	7.80522		45.697	67.8608	100.621	196.529	152.357	158.08	0.899656
ENSG00000025156	3298	HSF2	heat shock transcription factor 2		68.8425	72.5677	84.2546	50.8456	54.5715	28.1786	21.9291	25.8331	15.1574	19.1839	20.4775	23.874	70.1805	73.5449	72.9618	67.0665	76.7345	64.4895		43.4911	31.7105	23.3437	24.1199	29.2863	31.6344	0.899649
ENSG00000269707	---	---	---		2.06088	2.53527	3.01734	5.44715	3.46835	1.65954	2.04185	2.02959	1.06297	1.052	1.48917	1.21861	1.28626	1.50311	1.43517	1.60411	3.3375	2.94542		2.02214	1.48191	1.12816	1.29457	1.21212	1.14821	0.899549
ENSG00000126005	101410538	MMP24OS	MMP24 opposite strand		8.99234	17.7234	16.3848	18.7262	18.9109	46.0144	53.0353	47.2097	86.3069	52.3084	59.4068	43.8619	10.852	18.4792	16.0001	16.2808	19.4863	19.5073		31.5322	49.9205	87.4777	70.2257	68.5687	68.3529	0.899504
ENSG00000159712	---	---	---		0	0	0	0	0	0.586705	0.711709	0.792702	1.07471	1.07517	0.924074	0.628272	0.780797	0	0	0.471948	0	0.713725		1.54885	1.95513	2.01264	1.83978	2.26968	2.45226	0.89944
ENSG00000185518	9899	SV2B	synaptic vesicle glycoprotein 2B		2.45613	8.38812	13.3323	33.7797	106.25	149.073	145.514	396.412	136.215	378.275	472.967	680.912	0	5.14356	2.514	17.8168	17.2496	36.7705		116.93	224.536	341.722	213.661	451.504	600.67	0.89934
ENSG00000152503	55521	TRIM36	tripartite motif containing 36		95.4556	208.987	223.511	118.308	131.832	54.7647	25.8384	45.2365	23.7491	39.0641	45.0116	55.138	37.1277	94.9532	125.483	144.202	130.133	142.512		54.491	50.6899	34.9588	40.398	53.4385	53.7292	0.899305
ENSG00000261671	---	---	---		0	0	0	0	0	0.653757	0.594023	1.0548	0.89206	0.904118	1.21004	0.77046	0	0	0	0	0	0		0	0.897672	1.24639	1.45176	1.726	1.26037	0.899299
ENSG00000171634	2186	BPTF	bromodomain PHD finger transcription factor		76.0728	139.79	116.607	118.052	140.415	46.182	60.098	49.2002	46.5388	36.9122	56.151	61.5177	299.686	178.046	185.386	221.345	252.209	233.03		118.38	68.2522	58.7737	78.0595	72.6279	78.2052	0.899277
ENSG00000153187	3192	HNRNPU	heterogeneous nuclear ribonucleoprotein U		924.435	640.11	734.813	485.916	543.984	246.131	255.294	253.124	212.467	168.669	264.112	222.5	1037.33	717.853	740.924	617.292	668.137	614.725		407.151	310.542	277.476	310.428	283.268	271.143	0.899257
ENSG00000226085	---	---	---		3.88065	3.14061	3.98998	4.02886	2.83795	3.46994	4.16572	7.70697	4.99326	4.10546	3.45545	3.64303	0	0	0	0	0	0		0	0.910105	0	0	0	0	0.899236
ENSG00000163082	130367	SGPP2	sphingosine-1-phosphate phosphatase 2		0.471846	1.09289	1.43368	1.48716	3.42609	7.9289	8.29892	18.58	8.48093	14.7936	15.0966	20.2814	1.57451	0	0.612145	1.31989	1.10976	1.8399		7.33063	8.65406	6.97637	4.577	9.42553	15.5094	0.899145
ENSG00000137338	84547	PGBD1	piggyBac transposable element derived 1		20.9305	32.1151	28.7351	29.0515	27.5487	7.99595	7.45872	6.92262	7.62523	4.65086	8.19066	11.0374	25.7724	36.0582	32.3468	31.0841	32.5272	34.279		22.6124	16.0427	12.6864	15.5814	16.2359	18.1216	0.899109
ENSG00000263002	10780	ZNF234	zinc finger protein 234		8.22341	13.2275	11.3719	11.6527	9.47695	2.9	2.98452	2.46852	3.16141	3.08872	3.2813	3.67811	14.8997	10.483	13.7938	12.9911	17.9819	16.0816		7.57975	6.50823	3.04772	5.17822	4.66061	4.41645	0.899055
ENSG00000162623	127253	TYW3	tRNA-yW synthesizing protein 3 homolog		7.66166	1.74606	1.83302	3.15569	2.96827	2.9	4.22236	7.59685	6.96469	9.20258	8.07127	12.5031	18.0027	7.38781	5.60722	4.98281	3.92146	5.65234		6.87229	9.97172	7.74922	10.7985	13.4872	14.8664	0.899004
ENSG00000086848	79796	ALG9	ALG9 alpha-1,2-mannosyltransferase		16.8598	21.3889	18.604	15.7355	16.7543	7.59364	7.48171	7.73234	7.24835	8.20714	10.2745	10.6506	31.7814	34.141	28.8999	29.1778	32.1745	29.9258		15.2241	11.6126	12.4638	13.1615	11.9866	14.8232	0.898987
ENSG00000256293	---	---	---		1.00124	1.90097	2.26526	1.114	1.58577	2.59826	2.55529	5.07569	2.87771	6.0223	5.58571	7.304	0.508089	0.85571	0.922556	0.897453	1.15802	0.816633		1.22658	1.91467	2.34817	2.59701	3.76549	4.65774	0.898809
ENSG00000090539	8646	CHRD	chordin		2.14084	1.67265	1.48848	5.16531	6.38247	59.1566	60.813	62.7863	45.8235	36.6278	51.6753	50.9205	6.74157	15.0488	9.10965	10.1208	23.4416	15.6019		61.8271	52.1345	75.1617	63.471	60.0266	77.8392	0.898763
ENSG00000143179	7371	UCK2	uridine-cytidine kinase 2		90.8782	76.7781	77.6726	80.6426	78.1955	46.8526	47.0566	45.6779	33.1065	30.521	39.3926	38.7956	77.7767	66.546	79.2288	67.9272	85.6425	63.4573		48.7791	39.2022	42.7179	35.3651	33.8484	32.499	0.898734
ENSG00000213096	9534	ZNF254	zinc finger protein 254		44.3086	31.0821	28.0806	21.6686	21.3817	9.53814	14.6159	10.1657	9.3805	9.80619	12.0218	9.68638	71.6031	54.8935	42.6434	42.1537	42.4423	49.1819		22.9265	15.4078	10.0639	12.4092	12.7041	14.8526	0.898706
ENSG00000076604	9618	TRAF4	TNF receptor associated factor 4		80.735	95.8263	111.31	121.671	94.1344	75.4167	53.3793	13.3416	51.8196	18.5178	12.8172	12.745	74.9048	83.1927	88.2181	83.1722	86.0584	95.7473		66.7225	28.2457	20.4703	36.5128	19.987	16.5733	0.898691
ENSG00000100628	51676	ASB2	ankyrin repeat and SOCS box containing 2		0	0	0	0	0	0.754335	0.774717	2.93843	2.48538	6.14125	10.6512	11.8996	0.474598	0.596419	0	0.662047	0	0		0.577233	1.76456	4.89402	4.28673	6.05086	14.6174	0.89862
ENSG00000272079	---	---	---		0	0	0	0.662722	0	1.29075	1.01823	2.86085	3.68355	2.12496	3.82633	2.41386	0	0	0.520421	0.909378	0	0.732319		0.503496	4.47584	3.39705	3.99777	7.04221	4.49852	0.898613
ENSG00000172667	64393	ZMAT3	zinc finger matrin-type 3		28.9827	20.9308	13.7081	9.69917	12.0737	34.9844	77.9966	124.49	72.3275	131.591	142.764	125.896	16.9747	20.5612	19.2124	24.3069	16.9565	23.6038		44.81	67.8406	65.5306	60.2077	76.1064	102.961	0.898544
ENSG00000198932	9737	GPRASP1	G protein-coupled receptor associated sorting protein 1		25.7877	50.054	44.7369	60.4223	91.5283	89.0618	107.872	180.273	85.4047	99.699	210.971	240.422	33.9502	103.537	73.8946	128.738	127.784	126.744		180.361	194.387	191.73	151.269	238.112	357.144	0.898515
ENSG00000135632	10322	SMYD5	SMYD family member 5		40.4512	51.9994	48.0616	61.4402	56.5196	73.6734	32.9284	30.1971	34.6546	25.1773	38.6934	46.9519	42.7681	39.7638	46.4132	51.4962	64.3147	53.3753		42.8916	36.0748	38.202	36.0568	38.0165	53.1124	0.898503
ENSG00000174132	345757	FAM174A	family with sequence similarity 174 member A		6.33037	8.7931	10.5231	13.2363	14.1141	17.3497	23.5351	43.2092	27.7738	38.5144	34.9013	25.8472	3.64651	7.89231	7.26062	7.80354	9.07967	9.67781		17.5132	45.5637	55.4999	50.9901	49.0716	37.2245	0.898465
ENSG00000115241	5496	PPM1G	protein phosphatase, Mg2+/Mn2+ dependent 1G		224.144	186.655	253.43	194.12	209.038	135.831	103.218	96.5217	74.5799	75.1247	77.1478	66.2322	186.106	189.436	186.786	164.355	166.942	143.749		132.441	108.49	91.0734	76.8701	88.3857	87.9595	0.898443
ENSG00000037042	27175	TUBG2	tubulin gamma 2		10.3949	16.2088	16.7809	32.7558	32.2138	81.2167	112.762	156.737	145.315	138.7	143.221	138.349	17.8938	33.3098	34.913	35.6408	45.438	45.1627		86.7214	125.805	233.583	168.526	198.588	196.036	0.89841
ENSG00000257086	---	---	---		0.705665	1.657	1.53969	1.94113	0.933584	0.419075	0	0	0	0	0	0	1.52977	6.27916	5.86908	7.37484	12.797	7.56166		3.737	1.36039	1.39099	1.22796	1.6869	1.48442	0.898407
ENSG00000145808	171019	ADAMTS19	ADAM metallopeptidase with thrombospondin type 1 motif 19		1.97665	0.722965	0	0.678011	0.408472	0.620231	1.71581	3.16299	1.61537	2.16465	1.57738	2.52878	19.0554	2.9302	1.35101	0.835696	0	0.644193		2.0701	4.34631	2.96001	3.74707	3.81866	4.15293	0.898352
ENSG00000154511	388650	DIPK1A	divergent protein kinase domain 1A		10.6308	26.1215	29.786	19.249	30.619	59.0225	41.4554	55.4587	38.5886	54.3777	57.1601	55.7267	6.45456	11.5072	12.0327	25.632	24.7856	20.2642		38.8688	44.4624	50.044	70.9315	71.8908	65.964	0.898335
ENSG00000078674	5108	PCM1	pericentriolar material 1		219.741	225.211	206.62	133.015	143.372	59.8942	69.6303	86.7227	51.8446	50.5121	81.7095	100.06	351.488	216.612	246.877	269.099	221.171	213.016		146.408	109.728	93.443	122.314	114.378	119.662	0.898293
ENSG00000135801	27097	TAF5L	TATA-box binding protein associated factor 5 like		39.5092	43.477	39.3508	38.0552	33.54	17.4168	19.5022	15.534	15.5521	16.5417	17.6814	17.2364	37.4499	30.3008	37.9304	43.0633	41.9433	39.3279		27.1813	21.524	15.8249	21.3784	19.9776	20.3565	0.89826
ENSG00000088876	79175	ZNF343	zinc finger protein 343		8.52335	8.49113	6.56918	10.847	9.2455	3.60404	4.60165	4.39763	3.45087	4.19539	4.64331	5.87804	16.046	14.8269	17.9875	13.4934	16.5556	15.1862		12.1873	8.22138	6.9341	8.39245	8.47991	9.22545	0.898218
ENSG00000163945	57654	UVSSA	UV stimulated scaffold protein A		3.42981	5.78217	3.75383	5.59834	4.1476	3.26878	2.10578	1.63622	1.96532	1.77885	2.08128	2.30118	28.7258	24.1594	24.8583	22.505	32.4331	30.5771		10.2546	8.20251	4.66684	9.23687	7.44585	7.54227	0.89808
ENSG00000198056	5557	PRIM1	DNA primase subunit 1		37.4964	15.0976	19.0834	12.1222	11.2997	7.59364	2.71642	2.33002	2.83912	1.55877	2.19793	3.41159	42.0741	23.9844	21.5837	14.2939	14.5812	13.3847		5.4663	2.75169	2.37469	3.04008	3.84463	4.38747	0.898012
ENSG00000183527	8624	PSMG1	proteasome assembly chaperone 1		10.7027	4.73346	5.23162	6.36609	11.0743	15.3717	17.0792	23.6041	20.4642	23.5785	19.5848	18.8284	32.1096	16.5195	7.2641	9.18766	10.047	8.33347		16.7309	27.4558	22.8055	28.6876	30.9357	30.8537	0.897874
ENSG00000125107	23019	CNOT1	CCR4-NOT transcription complex subunit 1		219.21	235.356	210.308	147.005	131.616	77.8306	75.5817	97.4443	43.1902	74.5222	87.507	97.2036	391.802	161.117	203.619	213.679	171.975	170.09		109.784	96.3881	75.6029	71.1713	81.0325	92.542	0.897835
ENSG00000140675	6524	SLC5A2	solute carrier family 5 member 2		0	0	0	0.728069	0.600978	2.56474	1.09708	0	0	0	0	0	0	0	0	0.589848	0.847157	0.741744		1.96122	0.563946	0	0	0	0	0.897794
ENSG00000112167	55776	SAYSD1	SAYSVFN motif domain containing 1		24.8929	26.1496	24.8786	19.8367	15.3909	13.5613	12.0526	10.1223	13.1824	12.0254	10.6842	9.09794	14.8281	19.2173	24.4771	23.1696	21.2511	19.2602		12.2348	16.1773	13.9426	13.4315	13.1984	11.8622	0.897762
ENSG00000167216	83473	KATNAL2	katanin catalytic subunit A1 like 2		1.46179	0.872375	0.991418	0.911241	1.27691	2.263	4.00049	4.21573	4.26467	3.79885	4.60031	3.74455	6.47025	3.30785	2.13906	2.42238	1.45088	1.82954		4.18016	7.38036	6.13282	8.40769	8.84311	7.73884	0.897731
ENSG00000158169	2176	FANCC	FA complementation group C		45.6637	22.4733	21.7204	17.382	11.3409	6.48728	5.8653	3.2152	3.36167	2.20409	2.32228	2.91401	39.5064	30.9728	31.8808	25.4705	19.3858	17.2449		7.57326	3.77619	2.41214	3.57475	3.56007	2.76024	0.897579
ENSG00000158373	3017	HIST1H2BD	histone cluster 1 H2B family member d		21.4524	21.829	19.1667	7.8592	4.35821	6.99017	2.32427	5.6338	6.72597	6.89678	3.18566	3.49321	9.9528	11.8769	12.1689	8.92444	6.43051	4.89556		6.34502	7.83076	6.52427	5.69747	6.26329	3.46851	0.897552
ENSG00000134548	80763	SPX	spexin hormone		0	0	0	0	0	1.29075	9.86051	8.94105	16.8514	16.0436	18.1256	11.1463	1.40917	0.767001	0.815776	1.00187	0	0		2.27433	10.8086	13.0807	17.1027	12.5753	14.1221	0.89755
ENSG00000134901	79070	POGLUT2	protein O-glucosyltransferase 2		19.567	8.84452	8.14965	6.45592	4.98086	6.05144	3.3891	1.79616	2.65749	1.96071	1.4939	1.97327	25.7553	15.4746	13.2718	12.4053	8.62463	9.25519		6.10985	4.22528	3.51048	4.00364	3.9861	3.02551	0.897545
ENSG00000181649	7262	PHLDA2	pleckstrin homology like domain family A member 2		0	0	0	0	0	0.653757	2.04359	1.88111	3.78271	2.04978	1.89469	1.8808	0	0	0	0	0	0		0.590192	1.10601	2.11756	0.701415	1.88428	0.961024	0.897486
ENSG00000174951	2523	FUT1	fucosyltransferase 1 (H blood group)		0.948639	1.03104	0.863099	0.635712	0.970841	8.80057	7.8977	3.57408	5.41079	5.25197	8.80909	9.81865	1.74586	2.29065	1.3823	2.3589	0.615845	0.880833		5.84455	5.46847	3.90627	3.51292	5.16139	8.1201	0.897476
ENSG00000070501	5423	POLB	DNA polymerase beta		49.7127	69.0767	95.305	65.8554	56.7107	34.2803	32.8391	35.2736	36.3203	22.7418	24.8953	21.4016	36.6927	63.4232	60.0976	67.7333	58.6811	61.7898		44.6561	40.1053	42.9859	37.9773	43.1351	32.4726	0.89744
ENSG00000065135	2773	GNAI3	G protein subunit alpha i3		212.827	167.753	194.488	85.4397	81.3115	66.1971	40.648	23.8518	28.3006	26.2207	28.658	20.3575	162.376	119.306	132.631	133.066	98.7047	108.543		67.891	44.5356	22.1023	28.0824	28.1793	26.1368	0.897437
ENSG00000165704	3251	HPRT1	hypoxanthine phosphoribosyltransferase 1		15.0319	14.6995	20.5065	16.7888	24.9911	47.8919	45.5456	101.127	59.3487	111.128	107.575	108.554	19.7778	18.0671	15.1404	19.7621	24.8912	21.0081		34.4468	93.6258	102.327	74.6619	115.495	130.045	0.897406
ENSG00000137404	11270	NRM	nurim		48.8354	26.4108	22.7816	22.0793	13.9021	15.1705	4.59056	1.90253	4.95142	2.25287	3.14406	2.42542	44.2733	30.8252	33.397	23.6935	15.3582	18.1047		8.77467	3.07857	3.39556	3.52121	2.23465	2.11251	0.897287
ENSG00000120868	317	APAF1	apoptotic peptidase activating factor 1		45.2019	56.6113	51.3285	32.3608	47.0457	26.9717	23.2144	23.9155	13.7002	12.3616	17.6476	19.0394	81.5952	43.7768	47.8139	50.6067	47.8967	53.724		34.7012	13.7469	7.76632	7.85429	9.11742	9.83093	0.897259
ENSG00000230055	---	---	---		5.67635	4.54092	5.58739	7.39142	6.30505	12.9243	20.0903	18.089	44.3259	27.0586	27.0989	23.8485	3.0649	3.49144	4.54756	4.59887	4.9543	5.31877		8.58863	21.5328	34.3604	29.743	33.7571	31.3291	0.89717
ENSG00000158669	137964	GPAT4	glycerol-3-phosphate acyltransferase 4		70.4222	91.8288	90.0589	90.0452	89.9313	59.3578	45.7562	52.9368	26.2455	28.3355	41.5173	48.0981	94.1158	117.816	127.474	133.549	126.948	122.867		112.583	84.379	77.8211	80.0005	73.4768	79.3052	0.897146
ENSG00000149136	6749	SSRP1	structure specific recognition protein 1		395.327	217.593	275.291	236.823	228.422	126.041	84.8481	93.7033	72.2883	54.8797	83.7961	91.04	432.285	300.577	315.089	253.628	236.971	222.423		163.603	114.602	120.193	104.652	116.098	127.652	0.89712
ENSG00000105325	51343	FZR1	fizzy and cell division cycle 20 related 1		111.503	112.684	104.954	159.474	132.544	143.81	84.785	69.8747	67.2592	35.5641	69.2589	64.3037	98.7231	117.821	112.894	107.357	127.274	104.853		95.668	65.3849	71.3566	67.9964	63.5301	64.9142	0.897108
ENSG00000117118	6390	SDHB	succinate dehydrogenase complex iron sulfur subunit B		55.5327	42.934	50.684	44.5123	36.566	62.8109	78.0402	88.0034	93.368	86.2083	79.8952	81.428	30.0384	40.8249	42.5687	43.9864	40.0434	36.6719		58.6091	88.3717	92.5417	102.071	107.998	92.8833	0.897072
ENSG00000153234	4929	NR4A2	nuclear receptor subfamily 4 group A member 2		12.3544	365.954	259.772	95.3314	43.1167	45.1763	17.3335	36.7182	15.6005	25.457	30.1442	30.0147	7.25356	21.0565	158.968	72.3036	96.5652	37.9909		28.9279	24.8106	17.2722	16.9749	36.1342	21.8659	0.897055
ENSG00000162494	126755	LRRC38	leucine rich repeat containing 38		0	0	0	0	0	0	0.979577	1.29971	0.586675	2.18605	1.50363	1.85382	0	0	0	0	0	0		0.918478	0.405729	0.964083	2.60495	1.05314	1.39074	0.897018
ENSG00000151623	4306	NR3C2	nuclear receptor subfamily 3 group C member 2		1.335	3.79661	3.44035	4.96515	6.67596	12.6225	16.6688	9.88408	14.071	19.2089	38.38	38.1655	1.74478	1.35681	2.82472	4.08584	3.52237	5.80702		11.9811	17.7961	16.1579	17.4018	21.3061	34.7865	0.897018
ENSG00000196388	388324	INCA1	inhibitor of CDK, cyclin A1 interacting protein 1		1.15259	2.04448	1.76862	2.81153	3.13331	6.78901	4.72916	5.58863	6.8108	4.33475	4.36407	4.41014	0.86536	0.55968	0	0	0.607908	0.979295		1.50986	2.1901	3.82347	2.66326	2.59721	2.69503	0.897004
ENSG00000162413	9903	KLHL21	kelch like family member 21		17.746	14.3094	10.6663	17.6401	13.5274	32.5034	33.2584	31.8031	43.9063	35.7625	62.1173	72.1102	21.2217	15.413	18.3479	18.5587	22.2769	18.804		33.7608	41.8546	36.2193	40.6253	38.3534	60.0415	0.896981
ENSG00000137364	7172	TPMT	thiopurine S-methyltransferase		6.20556	7.27486	7.62447	3.43426	6.2056	11.0803	18.2444	37.6748	18.9737	29.788	36.3078	31.5929	12.2463	11.6028	10.7305	10.0553	8.22528	9.12336		17.1449	35.815	37.5139	36.2923	40.335	52.1202	0.896912
ENSG00000106477	95681	CEP41	centrosomal protein 41		52.3556	76.9493	79.124	47.492	43.5271	21.4063	22.3067	28.8233	15.5039	28.4381	29.1387	32.8171	64.5215	54.0627	57.0739	59.2484	54.9107	52.1798		29.1579	28.4541	27.4629	32.8556	28.9659	30.7658	0.89688
ENSG00000169583	9022	CLIC3	chloride intracellular channel 3		0	0	0	0	0	1.42485	0.747467	0.726582	2.00957	1.09453	1.10994	0.618772	0	0	0	0	0	0		0	0.556819	1.01565	0.516294	0.531092	0	0.896872
ENSG00000100075	6576	SLC25A1	solute carrier family 25 member 1		114.143	65.2731	72.3775	91.996	68.6842	109.01	60.6169	25.3137	52.8608	22.2524	29.812	25.8546	76.923	88.2724	70.9743	57.0348	64.6539	49.3343		47.485	32.1754	28.8017	36.2801	24.2655	22.0862	0.896857
ENSG00000168806	9836	LCMT2	leucine carboxyl methyltransferase 2		27.3937	37.7883	39.137	31.5433	25.6961	15.4722	10.8492	10.6547	8.14454	11.6923	11.2241	9.23498	17.6404	17.5558	21.4557	20.1288	28.0994	21.5843		7.48047	7.26964	7.74266	5.77497	7.1054	8.42178	0.8968
ENSG00000165443	84457	PHYHIPL	phytanoyl-CoA 2-hydroxylase interacting protein like		68.8925	107.081	118.062	57.3351	53.1442	105.255	149.387	213.703	158.068	303.075	222.344	240.141	28.7445	56.5719	68.757	98.0791	80.5908	85.8587		100.888	175.516	187.854	238.491	264.681	237.8	0.896783
ENSG00000128604	3663	IRF5	interferon regulatory factor 5		0.556939	0.99422	0.773866	0.548748	0.693283	2.83295	2.91321	2.18887	2.60145	3.02644	2.36845	2.60033	0.553074	0.619644	0.735073	1.68896	1.02827	1.06664		4.68177	7.182	5.65223	6.09857	4.86353	4.36658	0.896777
ENSG00000159307	80274	SCUBE1	signal peptide, CUB domain and EGF like domain containing 1		47.4231	183.106	175.606	296.873	313.112	85.7427	25.3921	14.6322	21.4299	8.57525	14.1756	5.60065	143.511	93.4126	155.433	114.76	306.769	155.666		54.0715	16.7575	5.87382	9.34186	6.87644	3.85815	0.896764
ENSG00000083168	7994	KAT6A	lysine acetyltransferase 6A		161.628	216.293	195.296	123.573	121.153	49.937	59.0285	26.4262	35.3253	31.446	50.3687	45.122	189.73	118.345	167.871	163.046	163.24	155.989		86.382	46.5221	28.1059	34.3723	31.0864	37.8555	0.896762
ENSG00000110375	7379	UPK2	uroplakin 2		0.562972	2.05237	1.97688	2.59327	3.59128	2.9	1.33173	0.654939	0.411314	0.659511	0.414931	0.440078	0	0.816135	2.07511	2.72096	1.79749	3.48694		2.35891	0.551976	0.66288	0.636882	0	0.593796	0.896719
ENSG00000164088	132160	PPM1M	protein phosphatase, Mg2+/Mn2+ dependent 1M		4.17579	11.4419	10.7531	17.575	21.8493	58.7543	34.9764	51.8483	45.909	36.9905	29.3558	28.742	5.54471	6.54892	9.42335	13.5893	20.4814	16.7863		28.4229	35.6019	43.6436	20.3153	27.7602	30.4545	0.896625
ENSG00000109790	51088	KLHL5	kelch like family member 5		40.2315	87.8916	75.0333	24.0893	23.4162	49.0988	63.3254	47.1162	37.744	40.1324	46.1564	40.8121	54.7145	40.1618	62.1706	58.9298	36.5251	36.7661		60.1852	41.3293	29.8375	36.2987	39.3489	36.532	0.896618
ENSG00000138134	57559	STAMBPL1	STAM binding protein like 1		4.7414	7.68954	7.80155	5.31815	3.22423	4.24104	4.51583	14.7888	10.605	13.209	16.3329	26.9533	5.48191	6.48193	7.99186	8.66105	6.8237	3.49587		7.30572	8.58454	17.364	16.06	28.097	33.0536	0.896596
ENSG00000176973	23625	FAM89B	family with sequence similarity 89 member B		20.3303	25.6226	22.382	26.5963	16.789	29.7543	22.7266	12.7074	18.6769	8.43616	12.8162	8.71039	8.07502	16.4182	18.075	18.0391	18.9553	16.1707		13.6342	11.9745	16.1395	10.6984	10.1148	8.70402	0.89651
ENSG00000070526	55808	ST6GALNAC1	ST6 N-acetylgalactosaminide alpha-2,6-sialyltransferase 1		0	0.732545	0.924009	0.879365	1.13881	8.56589	4.84767	2.94384	7.33596	2.86007	3.03117	3.03652	0	0	0	0.686888	0.925115	1.99836		2.56635	2.95257	5.03346	3.18396	3.12424	2.98323	0.896508
ENSG00000166188	57567	ZNF319	zinc finger protein 319		24.3851	37.7018	35.0048	44.7452	31.9532	26.737	16.5342	10.6719	13.873	8.39483	15.6607	12.606	18.2279	21.941	22.7971	25.2948	26.1306	28.1832		17.5237	12.2869	10.5679	7.25221	8.14451	9.55213	0.8964
ENSG00000104695	5516	PPP2CB	protein phosphatase 2 catalytic subunit beta		183.937	174.006	217.489	164.337	189.265	246.265	275.372	273.487	252.048	261.356	277.559	240.126	110.995	145.135	142.894	184.76	167.515	173.947		257.766	311.664	247.18	221.107	241.884	243.561	0.896395
ENSG00000260579	---	---	---		1.30287	2.7033	1.79608	2.54627	1.79416	1.25722	2.39654	0.725597	0.902007	0	0.915794	0.872933	1.49397	1.80947	2.15144	2.48731	2.58322	2.18331		2.2134	0.947256	1.21883	0.754564	0.83948	0.996298	0.89635
ENSG00000184635	81931	ZNF93	zinc finger protein 93		15.5283	11.7786	9.30808	7.17265	4.48649	1.62601	2.34823	1.22384	0.79213	1.10681	1.09404	0.925848	26.4834	11.7516	15.6788	12.948	9.85526	9.98479		3.50548	1.91832	1.13752	1.09826	1.0411	1.26789	0.896333
ENSG00000182534	439921	MXRA7	matrix remodeling associated 7		30.7495	38.988	42.1268	44.544	39.929	77.4618	60.3725	94.5311	127.335	120.651	111.042	115.924	39.825	34.9052	31.0196	46.4662	27.4005	44.4738		80.3652	87.6724	133.747	81.5344	124.52	151.363	0.89629
ENSG00000207652	693206	MIR621	microRNA 621		2.0764	1.49934	1.60048	1.5899	1.55625	0.787861	1.06695	0.609913	0.541256	0	0	0	2.01963	1.06636	1.31832	1.56288	1.13769	1.17057		1.08742	0	0	0	0	0	0.896268
ENSG00000225110	105373377	PNMA6F	PNMA family member 6F		0	0	0	0.549052	1.26411	5.01213	2.68056	4.84579	2.40276	2.10432	6.47119	8.17065	0	0.540791	0	0.410517	0	0		2.59887	3.83702	4.99311	1.87018	4.12798	9.40812	0.896259
ENSG00000183853	55243	KIRREL1	kirre like nephrin family adhesion molecule 1		60.9556	54.0867	35.842	35.7706	29.9045	42.6283	17.6834	9.3145	5.96048	6.72512	8.33889	6.5139	128.21	61.8995	69.0006	65.8767	71.376	48.2391		38.622	20.3749	7.03148	3.84933	3.89892	5.54579	0.89615
ENSG00000101115	57167	SALL4	spalt like transcription factor 4		2.40012	0.428017	0	0	0	0	0	0	0	0.452788	0	0	45.7717	3.60247	1.12574	1.14271	0.44352	0.76272		0.501904	0	0	0	0	0	0.896145
ENSG00000261728	---	---	---		0	0	0	0.567676	0.443027	0.620231	0	0	0	0	0	0	0	1.19865	1.16852	1.26966	3.81219	2.13108		1.19683	1.67365	0.706225	0.54954	1.08782	1.06691	0.896062
ENSG00000196267	162962	ZNF836	zinc finger protein 836		5.41852	17.2507	15.0247	14.1516	14.6148	3.63757	3.34689	3.74537	1.846	2.04067	2.91281	3.06227	6.03363	9.45347	12.9065	14.957	21.403	16.5802		6.91862	2.99962	2.55892	2.35677	3.11019	3.2673	0.895991
ENSG00000188707	113763	ZBED6CL	ZBED6 C-terminal like		7.15772	4.46057	3.64518	4.83756	4.77479	1.02254	2.1671	1.35295	1.30243	2.0121	1.53714	1.13273	7.0399	7.81046	6.92726	5.36599	4.70957	7.24724		4.23883	2.60772	2.303	1.06593	1.28957	1.45471	0.895894
ENSG00000134086	7428	VHL	von Hippel-Lindau tumor suppressor		25.3511	57.5217	48.9353	72.8584	62.7241	26.2341	19.5453	19.4301	13.7006	10.6471	20.9151	22.8613	73.6996	69.8796	68.7012	64.3509	92.6865	75.9909		42.0263	30.2632	27.6027	19.6248	21.7316	29.0019	0.895886
ENSG00000092201	11198	SUPT16H	SPT16 homolog, facilitates chromatin remodeling subunit		370.422	265.877	290.983	185.449	216.071	114.072	85.1139	103.292	54.936	76.8587	103.907	108.847	447.932	248.273	269.742	246.917	222.475	210.262		162.877	103.317	109.98	91.269	111.694	132.109	0.895864
ENSG00000224905	---	---	---		1.85465	1.90137	1.74508	1.05743	2.1921	2.19595	1.13	0.521308	0.52271	0	0.644849	0	2.61019	1.2956	1.5938	1.58395	0.868198	2.26492		1.08917	0	0	0	0	0.579595	0.895823
ENSG00000121775	55116	TMEM39B	transmembrane protein 39B		27.2299	24.8381	23.4071	32.059	25.0469	21.004	19.0385	13.0925	18.6347	13.6841	15.645	15.5703	28.1599	31.6693	30.2034	28.7596	30.7179	28.8688		19.8167	20.4394	22.4109	22.1499	19.77	18.0513	0.895786
ENSG00000198551	199692	ZNF627	zinc finger protein 627		87.6662	86.7583	97.172	58.1664	54.3055	30.693	18.6763	16.8682	12.7432	13.4535	12.9142	10.2224	46.262	45.8235	54.1427	64.0127	60.4604	57.6044		27.9588	12.2249	9.38501	8.22856	9.42853	9.89491	0.895765
ENSG00000159086	94104	PAXBP1	PAX3 and PAX7 binding protein 1		34.8962	28.2227	25.5127	33.01	32.5929	10.3763	12.6339	11.3866	13.105	11.6545	11.1628	15.7168	172.847	151.131	107.471	78.551	80.5378	100.008		45.4923	37.3914	21.2492	43.2272	36.7202	27.8641	0.895762
ENSG00000177098	6330	SCN4B	sodium voltage-gated channel beta subunit 4		1.94494	5.2096	4.73122	11.1381	25.3338	40.9855	42.9479	77.0894	31.7791	71.4624	97.0149	122.82	1.09502	2.45969	3.56371	11.6258	21.0646	19.8123		40.5404	83.7153	72.011	49.0471	67.0364	108.425	0.895691
ENSG00000261572	---	---	---		0	0	0	0	0	0.854913	1.06685	1.27093	1.16802	1.30789	1.02643	0.990249	0	0	0	0	0	0		1.00649	1.81138	2.0051	0.912786	1.66951	1.92627	0.895664
ENSG00000187840	1978	EIF4EBP1	eukaryotic translation initiation factor 4E binding protein 1		51.7061	55.6518	59.8011	48.6319	30.0705	34.6826	14.6264	3.71623	7.52611	3.74131	3.3039	2.16421	27.7951	27.7159	44.4751	23.3717	35.2471	24.65		17.439	9.55835	7.07769	4.05866	3.61924	3.08908	0.895659
ENSG00000171246	4884	NPTX1	neuronal pentraxin 1		40.4702	31.9376	11.3765	27.0959	34.1316	58.0502	84.9683	289.205	86.5827	276.667	397.198	562.244	3.56224	47.7127	58.8695	53.3174	106.602	40.8007		52.7297	214.086	212.581	109.546	291.441	413.191	0.895611
ENSG00000143612	25912	C1orf43	chromosome 1 open reading frame 43		166.9	151.58	197.139	151.704	139.086	191.92	181.765	222.447	266.688	333.167	228.245	230.339	111.769	127.385	140.029	138.551	131.133	123.64		149.905	190.759	231.909	251.696	242.485	223.283	0.895545
ENSG00000145041	9730	DCAF1	DDB1 and CUL4 associated factor 1		68.0183	72.3583	80.641	49.5892	51.4193	20.9705	20.9241	25.8047	15.7582	19.4989	24.3951	28.2565	80.8613	52.9248	70.6218	61.4456	66.9101	56.4655		35.0917	32.4264	20.8751	23.404	25.4602	29.4788	0.895487
ENSG00000223572	548596	CKMT1A	creatine kinase, mitochondrial 1A		0.957951	2.03603	3.3435	3.06761	5.60385	7.52658	14.8738	25.2967	18.4383	23.4199	25.7023	21.0087	0.816088	3.53643	2.43317	2.90739	5.78858	3.50012		10.0904	19.0804	23.0212	20.9928	28.51	33.2427	0.895463
ENSG00000167635	7705	ZNF146	zinc finger protein 146		88.8347	73.6439	69.6268	56.5716	53.234	25.5971	23.0787	15.3169	11.8748	10.8638	25.7389	29.266	125.34	79.6693	89.3707	91.7908	93.318	86.5972		47.4824	32.502	21.5741	29.2403	30.572	33.8331	0.895419
ENSG00000105655	51477	ISYNA1	inositol-3-phosphate synthase 1		177.533	105.589	117.09	197.582	202.206	202.648	61.9499	33.6204	49.2905	17.8911	33.5787	22.5191	215.606	168.822	119.905	102.304	159.035	110.483		100.056	34.0409	37.1535	20.3551	21.3954	19.8273	0.89536
ENSG00000196466	90576	ZNF799	zinc finger protein 799		2.89056	2.28414	1.97149	1.72855	1.68684	1.29075	2.0511	1.09732	1.49115	1.0778	1.28092	1.02619	5.13939	5.82244	5.16238	4.18873	4.4964	4.99934		5.16667	3.61139	3.23126	2.35595	2.91237	2.38157	0.895301
ENSG00000237720	---	---	---		0	0	0	0	0	0	0.619531	3.74008	1.4181	2.54909	2.57482	2.5822	0	0	0	0	0	0		0	1.65175	1.68255	1.19025	1.12082	1.57821	0.895277
ENSG00000205436	91828	EXOC3L4	exocyst complex component 3 like 4		0	0	0	0	0	0.519653	1.19842	1.72119	1.59259	1.2317	0.60734	0	0	0	0	0	0	0		1.16117	0.74086	1.3441	0.685363	0	0	0.895223
ENSG00000100941	5411	PNN	pinin, desmosome associated protein		140.622	84.0332	96.6918	75.1542	98.1426	30.5925	54.8581	46.4736	43.8872	31.1778	47.3402	43.6612	335.269	330.425	246.613	174.7	202.184	188.726		159.954	133.941	85.1162	128.606	120.906	107.397	0.895138
ENSG00000148057	414328	IDNK	IDNK gluconokinase		4.34077	4.4621	5.3316	4.6896	5.31729	5.71618	6.87017	7.29213	11.7838	9.33056	11.9561	10.4564	2.33599	6.54578	5.87128	5.05509	4.59017	6.54663		7.35937	7.82214	14.3068	12.4579	12.1188	17.4594	0.895129
ENSG00000092208	8487	GEMIN2	gem nuclear organelle associated protein 2		15.7907	11.224	12.6614	12.4772	12.2102	11.4827	9.43842	9.2512	8.30483	8.24852	6.68924	7.15142	20.3859	18.495	16.4179	14.8456	15.0643	15.239		13.4303	10.3725	11.2477	10.7439	12.0943	10.4315	0.895121
ENSG00000066136	4802	NFYC	nuclear transcription factor Y subunit gamma		70.7602	74.1484	79.4676	72.0723	64.7894	94.5265	57.8972	44.1927	44.4857	47.4183	51.0331	49.0569	83.6902	79.1915	74.7175	82.6688	80.9138	70.6693		66.3711	57.9669	63.6585	51.1128	49.7173	53.9553	0.894969
ENSG00000167779	3489	IGFBP6	insulin like growth factor binding protein 6		1.44588	1.12347	1.62123	4.54427	7.09829	14.9358	6.25293	11.7355	18.8157	21.2636	18.1106	15.6041	1.05175	1.02931	1.01194	1.40529	2.03379	3.01583		5.03405	5.55228	16.4578	13.544	23.4683	17.0347	0.894942
ENSG00000172661	253725	WASHC2C	WASH complex subunit 2C		12.6206	14.4082	16.0125	13.1826	14.5059	7.19132	7.82299	11.0925	3.43399	7.34467	6.56094	10.7225	22.6878	16.2157	19.4495	22.4907	20.2167	19.6214		16.5877	12.0987	7.45435	8.7533	11.0356	15.7275	0.894898
ENSG00000164125	51313	GASK1B	golgi associated kinase 1B		5.20092	2.73614	1.33556	1.15689	1.58405	8.1971	31.35	50.0309	39.9566	92.2776	78.8493	46.876	12.7362	4.63006	4.66804	5.50824	0.914077	9.23158		15.5151	26.1704	26.8069	38.8278	49.1938	48.0438	0.894871
ENSG00000204599	56658	TRIM39	tripartite motif containing 39		11.9858	13.4051	13.164	13.975	13.0569	9.23641	6.75624	8.721	8.83173	5.57618	8.16123	8.23639	14.7372	14.1539	15.6192	14.1283	15.1755	15.3438		11.6933	12.5266	10.7282	10.7283	9.61798	10.6781	0.894832
ENSG00000145431	56034	PDGFC	platelet derived growth factor C		54.2155	79.4754	66.2881	24.2274	16.7264	15.8746	14.7561	8.41142	13.6603	6.80652	12.4005	7.47517	31.4035	19.4961	45.2052	36.5916	25.7013	21.7497		16.2244	10.0226	7.65997	7.27966	7.82366	9.22382	0.894672
ENSG00000013016	30845	EHD3	EH domain containing 3		12.4699	23.1246	18.5231	21.0271	19.2994	40.315	59.0814	117.781	69.0876	195.709	201.938	232.833	17.2101	12.5432	16.4584	24.534	18.4011	18.5899		40.3197	101.725	115.512	91.1226	152.268	236.364	0.894665
ENSG00000172985	344558	SH3RF3	SH3 domain containing ring finger 3		25.4	42.3216	52.0423	103.504	99.3324	103.612	68.5791	64.933	28.1803	23.414	33.3711	24.6216	6.44854	19.62	43.2568	37.033	95.8924	108.562		99.2297	62.7896	58.5274	21.2339	25.8452	23.8274	0.894641
ENSG00000132334	5791	PTPRE	protein tyrosine phosphatase receptor type E		1.47001	9.13831	9.11	16.4336	20.5731	31.6318	57.3447	47.8008	29.3152	49.4894	51.4906	50.0772	3.37966	8.32197	4.96569	16.8378	38.198	22.2545		60.942	64.3042	46.3394	50.6468	43.9475	47.3536	0.894598
ENSG00000152904	9453	GGPS1	geranylgeranyl diphosphate synthase 1		43.0615	47.1003	57.1849	36.2064	44.9946	27.2734	32.1642	37.21	30.9227	33.4687	30.4186	27.2076	59.2617	56.9054	55.3424	63.2961	54.3828	56.919		41.1997	42.0083	41.0504	35.2991	39.1844	37.0249	0.894555
ENSG00000172175	10892	MALT1	MALT1 paracaspase		11.6728	11.3158	9.47804	6.62354	9.44605	8.63294	7.54561	4.93189	3.1254	3.80991	3.60482	3.6913	30.9868	18.7301	14.881	17.5427	15.1252	21.1287		14.8742	10.5866	5.13946	6.02037	6.43033	7.98914	0.894478
ENSG00000138101	1838	DTNB	dystrobrevin beta		23.203	21.8729	27.1123	33.2624	31.3075	48.1266	34.7248	62.4476	50.8489	53.7165	66.5846	64.1116	27.1039	30.523	22.3723	34.7438	43.5758	28.8541		40.9084	54.1527	84.2161	69.7839	83.8059	87.4259	0.894444
ENSG00000139517	222484	LNX2	ligand of numb-protein X 2		18.8929	35.4332	36.4105	11.6636	13.4217	11.6503	9.75619	9.34417	5.73926	8.28458	8.447	9.7634	18.667	12.3624	22.1282	21.5031	15.3554	14.0158		13.9783	8.94033	5.99556	6.74988	7.71492	8.33772	0.894381
ENSG00000156650	23522	KAT6B	lysine acetyltransferase 6B		133.258	235.799	194.05	128.46	140.143	61.2017	47.2433	24.2137	30.3029	26.0655	41.7605	39.0012	127.367	129.806	218.849	183.709	244.167	169.434		80.0439	36.451	34.9876	29.8657	30.9576	38.5188	0.894296
ENSG00000143093	85369	STRIP1	striatin interacting protein 1		74.3731	154.519	161.539	170.983	155.113	76.7577	62.7288	71.3995	45.5871	47.3827	66.1933	80.079	87.2101	111.518	122.073	146.586	141.222	139.814		92.5171	57.9837	80.2257	55.2783	71.4374	78.1362	0.894279
ENSG00000104853	1209	CLPTM1	CLPTM1 regulator of GABA type A receptor forward trafficking		76.6494	134.074	146.936	155.391	149.885	239.124	217.49	309.25	271.895	300.788	290.792	278.746	61.6242	86.579	91.1354	113.132	131.514	97.468		129.482	181.333	209.142	160.449	175.853	205.056	0.894241
ENSG00000120253	348995	NUP43	nucleoporin 43		33.2043	20.7643	17.4141	16.3825	14.7002	14.7682	11.5967	8.81864	10.0487	3.76636	9.45225	10.3877	68.7008	39.8947	37.6766	29.7408	26.1508	29.1256		15.8	13.3221	11.0781	13.1502	13.9575	13.4954	0.89423
ENSG00000100201	10521	DDX17	DEAD-box helicase 17		713.945	731.649	722.429	590.153	583.606	338.395	394.127	281.9	303.118	138.963	257.244	343.859	1516.8	1299.08	1126.04	1148.49	997.061	1198.79		715.066	632.739	420.63	688.803	584.197	615.994	0.894198
ENSG00000100014	23384	SPECC1L	sperm antigen with calponin homology and coiled-coil domains 1 like		47.8975	54.6644	49.0609	63.3459	56.702	37.7	32.4662	18.1878	26.2267	12.7173	27.9096	28.7332	72.761	68.3848	63.9181	63.1481	57.3597	61.0189		34.7908	30.1461	32.1045	31.0321	31.5216	34.4791	0.894189
ENSG00000198925	79065	ATG9A	autophagy related 9A		62.0347	72.4896	64.2355	88.9945	78.3777	157.622	120.426	113.997	120.222	126.423	176.77	179.482	51.5472	57.1724	62.9473	68.8407	74.0148	63.1708		80.9952	104.273	134.663	125.336	130.954	144.651	0.894146
ENSG00000185344	23545	ATP6V0A2	ATPase H+ transporting V0 subunit a2		24.8177	29.0744	25.0994	29.7362	30.5632	5.68265	17.2599	10.2386	12.9668	12.0498	12.3339	11.0571	44.4711	41.7372	44.5634	35.6605	69.517	54.0081		25.6923	28.0063	16.2356	20.166	17.5948	19.0588	0.894145
ENSG00000104413	54845	ESRP1	epithelial splicing regulatory protein 1		0	0	0	0	0	1.29075	0.492091	0.522707	0	0.49812	0.566303	0.719565	2.04496	0	0	0	0	0		1.0021	1.19013	0	0.606972	0.505799	0.811142	0.894139
ENSG00000125633	54520	CCDC93	coiled-coil domain containing 93		33.591	39.8338	28.0714	49.6422	40.8313	19.093	17.3419	15.1075	10.2448	8.72947	16.0515	20.3781	94.7059	80.7318	75.0376	98.731	105.692	115.168		57.6335	36.9367	16.19	18.6558	23.8949	31.4418	0.894133
ENSG00000137942	54874	FNBP1L	formin binding protein 1 like		276.097	520.118	509.509	308.12	378.952	173.011	71.267	45.5316	24.7694	30.544	31.3624	23.782	295.311	489.805	469.985	588.305	633.501	503.214		253.719	96.5969	30.7835	16.1	32.231	33.987	0.894098
ENSG00000175130	65108	MARCKSL1	MARCKS like 1		1119.22	1915.95	2067.03	2177.83	1852.47	1646.44	911.32	368.559	606.238	291.922	238.965	261.054	1153.03	1554.66	1378.57	1764.63	1817.18	1769.44		1466.53	428.13	545.697	820.886	348.393	223.653	0.893955
ENSG00000070540	55062	WIPI1	WD repeat domain, phosphoinositide interacting 1		4.2281	4.31536	2.11127	2.57715	3.04975	13.93	9.07493	4.49085	8.35522	9.38772	8.73181	8.05839	7.34625	6.49921	7.40566	5.71179	3.57041	5.29433		14.4166	12.1138	11.6474	12.1435	12.8835	12.8868	0.893937
ENSG00000242540	---	---	---		5.72833	10.1726	8.6735	9.12301	6.81509	0.720809	0.598223	0	0	0	0	0	3.52844	13.5259	10.9851	8.46289	9.21808	11.5566		2.53746	0.419165	0	0	0	0	0.893909
ENSG00000260065	---	---	---		0	0.529763	0.517456	0.500106	0.853612	2.49769	1.71859	1.81818	2.74817	0.906524	2.14154	1.51242	1.93541	1.6522	2.06975	1.811	2.6203	2.11007		2.80045	5.50408	6.07719	3.05885	4.79033	4.83994	0.893907
ENSG00000162694	2135	EXTL2	exostosin like glycosyltransferase 2		46.6179	41.0684	40.375	22.105	25.0846	26.6364	25.5366	28.5559	23.7109	41.5139	41.7805	53.1687	81.9824	48.5391	43.9277	46.3675	37.4377	39.1961		32.5049	40.4641	28.368	42.9134	52.1868	59.2081	0.893891
ENSG00000180917	55783	CMTR2	cap methyltransferase 2		29.3558	17.5675	14.6975	13.1998	11.0837	6.95664	7.65252	5.71051	5.61899	8.46844	7.14817	7.20409	48.3063	36.4495	26.8943	22.8972	25.425	26.0375		10.9609	13.0839	7.12889	8.71015	8.75915	7.6869	0.893889
ENSG00000108963	1801	DPH1	diphthamide biosynthesis 1		17.15	29.518	27.9602	34.4925	29.1677	31.4306	21.0867	21.9126	18.2987	15.9909	22.138	27.991	21.4589	28.3369	33.1288	31.1763	47.5051	35.1441		28.1793	23.5733	18.4051	17.9088	23.8205	37.2343	0.893846
ENSG00000158122	195827	PRXL2C	peroxiredoxin like 2C		1.26149	0.876417	0.821463	1.09571	1.31355	3.50347	4.94873	3.45042	4.44056	3.31168	5.15767	4.11413	2.17762	1.44124	1.2938	2.1441	0.998507	2.44458		4.50466	5.31158	5.5912	4.5246	4.50411	4.6482	0.893846
ENSG00000140557	8128	ST8SIA2	ST8 alpha-N-acetyl-neuraminide alpha-2,8-sialyltransferase 2		99.3377	286.539	250.615	259.992	299.039	113.435	14.1143	13.2431	2.62928	4.44191	2.45575	2.25659	85.1843	141.309	175.725	274.218	367.436	262.246		117.969	28.6177	9.44523	1.61806	3.60476	1.73635	0.893845
ENSG00000175602	11007	CCDC85B	coiled-coil domain containing 85B		23.3812	28.4329	29.4713	55.9121	44.7661	180.621	295.947	347.522	510.706	278.064	251.016	162.296	5.84559	15.391	7.64434	5.01478	16.2855	7.2888		33.4796	65.1253	191.567	103.959	75.412	38.3957	0.893828
ENSG00000155827	56254	RNF20	ring finger protein 20		79.6274	110.827	130.427	81.3581	85.049	47.2884	47.5231	60.511	43.7928	36.0508	56.5437	56.2327	113.204	99.3064	111.499	106.331	97.5767	86.7127		68.5917	51.2342	50.7994	48.3111	58.22	64.4065	0.893825
ENSG00000159593	8883	NAE1	NEDD8 activating enzyme E1 subunit 1		80.5036	52.4967	66.7875	53.8257	58.221	31.8329	35.6046	33.2174	34.7415	26.0768	33.5986	32.4243	114.63	82.1096	69.5761	68.4936	66.1935	69.8856		43.4969	46.2592	39.5415	52.068	52.519	54.3111	0.893788
ENSG00000185345	5071	PRKN	parkin RBR E3 ubiquitin protein ligase		3.77808	9.10403	6.87951	6.45251	6.07659	14.6676	15.7547	26.3254	12.4743	17.9752	27.8553	33.6385	3.03172	3.26656	5.6768	7.83761	5.37811	7.00284		12.5646	15.231	19.0347	11.8355	21.3611	29.4618	0.893744
ENSG00000107882	51684	SUFU	SUFU negative regulator of hedgehog signaling		52.2113	77.9254	64.3608	56.4209	52.2702	44.5393	27.0923	22.7586	25.2888	21.5624	27.7814	20.569	53.3035	39.6316	54.9209	53.8481	53.7323	54.4692		40.3017	22.9462	22.1375	16.4227	18.2813	19.1683	0.893736
ENSG00000173801	3728	JUP	junction plakoglobin		56.5852	142.296	138.861	173.706	184.012	218.304	43.6397	18.9136	21.3965	14.5646	20.0531	19.7128	78.48	78.4761	88.9579	119.755	136.273	118.994		95.0317	15.1513	18.8351	28.4841	19.1198	14.9028	0.893711
ENSG00000170423	196374	KRT78	keratin 78		0	0	0	0	0	0	0	0.69312	1.24613	1.68657	0.592815	0	0	0	0	0	0	0		0	0	0.720093	0.743944	0	0	0.893691
ENSG00000253161	---	---	---		0	0	0	0	0	0	0	0.497563	0	1.00346	0.800609	0.780462	0	0	0	0	0	0		0	0.991571	0	0.949224	0.635843	1.46428	0.893601
ENSG00000122507	27241	BBS9	Bardet-Biedl syndrome 9		35.2294	42.4664	45.4409	24.1604	22.4079	23.552	16.6951	18.8378	14.6374	12.0842	15.2217	16.0536	35.0472	29.545	36.9453	40.6937	31.6442	29.8666		22.8959	14.2664	13.774	17.7378	17.6308	16.9524	0.893571
ENSG00000167721	55720	TSR1	TSR1 ribosome maturation factor		46.274	35.971	39.1342	30.1142	30.1485	20.6352	15.4128	22.6516	10.2341	16.2661	19.0557	23.0906	92.1191	58.781	63.7432	61.0769	54.6223	54.0037		43.7608	36.5025	27.5034	28.6585	33.6224	42.1521	0.893562
ENSG00000101194	63910	SLC17A9	solute carrier family 17 member 9		0	0	0	0	0	1.42485	1.36124	1.22677	1.3462	1.32689	1.63697	1.12214	1.2969	0.710132	0.502617	0.408999	0	0		1.87673	3.42443	1.8347	2.61864	2.47171	2.60808	0.893539
ENSG00000105127	10270	AKAP8	A-kinase anchoring protein 8		25.727	23.4896	21.5559	28.7888	22.305	12.7231	14.7907	13.2476	15.8687	10.3194	17.4054	18.8267	46.5247	42.1661	40.4387	33.2261	38.4876	34.22		28.4544	19.6398	23.5782	22.9392	23.3336	27.6401	0.89345
ENSG00000173727	---	---	---		0.957035	1.05522	1.10749	1.4713	1.15856	1.2237	0.701083	0.425802	0.552535	0	0	0	0.496148	1.61713	2.16052	1.40968	2.86738	1.79469		1.04625	0.628253	0.630763	0.78076	0.652818	0	0.893427
ENSG00000132964	1024	CDK8	cyclin dependent kinase 8		49.8962	52.7558	57.0965	27.5449	26.8945	28.078	24.3533	29.1874	11.688	20.198	17.9215	17.2299	53.6261	49.9999	45.5155	43.5959	35.9782	28.9418		33.3119	38.249	21.8059	18.0863	23.6864	18.4215	0.893313
ENSG00000267508	26974	ZNF285	zinc finger protein 285		11.5581	19.7155	21.6294	16.1907	14.0083	5.95086	3.99296	3.71268	2.20793	2.83974	3.57572	3.85494	11.7923	19.0028	25.6225	23.7935	32.422	27.7571		13.3604	10.842	6.85935	5.52863	7.86134	7.87235	0.893307
ENSG00000163001	112942	CFAP36	cilia and flagella associated protein 36		61.1261	49.1731	62.0076	48.2161	52.0003	66.2641	63.3321	85.4589	74.9331	64.7762	74.0736	80.8786	45.3242	64.651	57.155	56.5325	55.6111	51.0446		82.627	114.05	117.696	92.2991	130.784	146.408	0.893217
ENSG00000112425	7957	EPM2A	EPM2A glucan phosphatase, laforin		9.16059	8.5287	10.3005	9.7355	9.79729	4.60982	11.5727	16.296	11.7978	17.9303	18.8338	17.3416	13.9947	13.339	12.2519	13.3898	10.4548	12.5387		10.8189	16.5358	17.8893	25.9305	23.8599	21.6733	0.893212
ENSG00000174939	253982	ASPHD1	aspartate beta-hydroxylase domain containing 1		10.5664	20.3437	24.1404	27.323	35.4916	91.2074	118.468	165.24	202.597	136.399	155.454	101.978	1.18787	20.9875	17.8859	15.2849	34.8783	21.7432		41.0595	116.451	192.056	184.639	150.656	101.538	0.893176
ENSG00000106992	203	AK1	adenylate kinase 1		5.81857	10.2228	10.5863	11.1532	9.75461	7.32543	5.48652	5.24378	5.54661	5.85642	5.14971	3.87355	1.77427	5.23474	5.60098	6.10965	6.33087	5.17931		3.78175	3.93326	4.14116	4.89584	4.02163	3.98848	0.893174
ENSG00000064607	10147	SUGP2	SURP and G-patch domain containing 2		145.925	178.962	179.523	227.057	191.828	101.936	101.896	113.688	65.4197	66.5444	114.495	135.223	307.527	387.701	368.512	339.494	382.585	368.645		250.639	243.416	234.659	211.173	244.214	315.717	0.893122
ENSG00000102302	2245	FGD1	FYVE, RhoGEF and PH domain containing 1		52.0388	99.4462	91.2672	95.3117	93.8247	98.1809	49.419	41.6285	21.8357	21.9888	31.5154	24.5726	54.6984	54.2782	60.132	77.989	82.6708	62.3768		59.7375	28.4961	26.7026	10.7877	15.7304	18.3688	0.893091
ENSG00000125991	51614	ERGIC3	ERGIC and golgi 3		262.544	241.589	332.894	293.042	246.747	316.502	166.577	143.802	168.165	135.446	106.513	105.933	163.651	173.509	200.129	194.877	190.701	171.491		163.671	98.0909	126.944	121.168	118.03	105.935	0.893013
ENSG00000147457	91782	CHMP7	charged multivesicular body protein 7		74.0308	104.579	101.915	97.8328	87.6478	77.8641	52.9267	62.2265	44.6712	35.9298	51.8509	49.649	57.4049	71.0866	86.1176	90.3736	82.7429	86.6404		65.3922	50.3062	65.2509	52.6144	59.2502	61.1093	0.892945
ENSG00000168453	55806	HR	HR lysine demethylase and nuclear receptor corepressor		0.788538	2.32306	2.93075	27.6327	52.8106	69.1138	31.387	64.1652	77.6339	81.3238	97.8594	98.842	0	0.656994	1.34987	1.03139	1.76962	21.1121		26.6756	27.4076	62.0683	97.9352	80.6019	64.3556	0.892944
ENSG00000255509	---	---	---		1.03512	0.614742	0.517307	0	0	0	0	0	0	0	0	0	1.01184	4.94159	0.665835	1.32667	0	0		0	0	0	0	0.534419	0	0.892931
ENSG00000147255	3547	IGSF1	immunoglobulin superfamily member 1		0.438204	0	0	0.420022	0.736093	18.7578	22.8739	9.19995	18.4236	9.71818	8.73539	6.97144	6.9481	2.55756	1.22461	3.47913	0.929092	1.59998		15.2604	11.4897	10.0885	12.7109	6.63365	6.97938	0.892928
ENSG00000168032	956	ENTPD3	ectonucleoside triphosphate diphosphohydrolase 3		0	0.931142	0.805345	1.21622	5.38853	9.77283	9.06718	22.3105	8.71171	19.0419	20.3893	25.2347	0	1.62761	0.701316	2.39675	1.33898	1.48674		14.3178	34.2559	29.2403	17.5299	26.0861	37.2179	0.892922
ENSG00000246465	---	---	---		1.22227	1.31056	1.12909	2.5468	1.83979	1.02254	0	0	0	0.445012	0	0	6.26226	6.29155	4.37624	4.5018	5.64955	4.99355		1.08285	0	0	0	0	0	0.892905
ENSG00000188672	6006	RHCE	Rh blood group CcEe antigens		0.535801	0	0	0	0	2.73237	0.554572	0.950294	1.15756	0.849903	1.66415	1.70892	0.479387	0	0	0	0	0		0.464725	0.795373	1.68462	1.18926	1.51585	1.21263	0.892876
ENSG00000136527	6434	TRA2B	transformer 2 beta homolog		324.326	158.664	177.348	160.544	142.953	64.856	77.2062	75.9844	69.8644	97.0716	79.5106	75.6525	400.677	286.747	241.608	208.503	168.432	221.956		129.346	116.074	85.9735	101.935	118.397	104.358	0.892751
ENSG00000229619	401093	MBNL1-AS1	MBNL1 antisense RNA 1		0	0	0	0.517955	0.965982	0.687283	1.2609	1.47953	1.31838	1.50196	3.0154	2.26935	0.859877	0.836398	0.905497	1.26646	1.31646	1.37103		2.38628	3.61899	4.31202	3.84748	5.08447	6.48552	0.892739
ENSG00000188266	123688	HYKK	hydroxylysine kinase		0.453552	0	0	0	0	0.620231	1.33563	1.48899	2.23709	1.78205	2.28774	2.03371	0.759397	0	0.561792	0	0	0		0.451213	1.42036	1.46383	0.848559	1.68187	1.74153	0.892626
ENSG00000018699	55622	TTC27	tetratricopeptide repeat domain 27		25.7895	22.861	30.039	17.643	20.4439	13.1589	8.57642	5.66151	3.35657	5.33597	4.31751	5.78089	27.6408	16.4807	21.3547	22.5338	22.2005	19.7658		12.6759	9.72803	9.1797	11.8691	10.0077	7.95261	0.892496
ENSG00000234345	---	---	---		0	0.67347	0.840851	0.883213	0.618431	0	0	0	0	0	0	0	0.877834	0.726836	1.48611	2.45962	4.73397	2.4431		0.934448	0	0	0	0	0	0.892445
ENSG00000104356	10940	POP1	POP1 homolog, ribonuclease P/MRP subunit		12.0479	14.6688	13.1537	11.5207	11.3556	4.07341	4.88793	5.52494	2.75527	4.31105	5.5963	4.90648	14.6723	12.3951	12.7265	12.1532	16.9202	12.9372		7.5535	7.10878	5.29074	5.47459	6.30109	5.94667	0.892371
ENSG00000101407	9675	TTI1	TELO2 interacting protein 1		51.8282	44.2436	45.5684	47.9718	38.1643	34.8838	21.7772	24.578	21.04	19.1853	25.4595	28.0117	92.5382	51.5211	53.9233	43.7952	40.0742	47.8417		30.2817	30.065	23.4863	23.2597	23.1868	28.1413	0.892355
ENSG00000172716	91607	SLFN11	schlafen family member 11		0.619323	0.923644	0	0.610177	0.638801	3.06763	3.66911	3.23128	2.22873	2.23453	2.50095	2.31204	1.76662	1.0633	1.67305	1.27229	0.737183	1.44021		3.93023	6.34674	4.18266	3.22933	3.53303	3.76921	0.892315
ENSG00000250479	400916	CHCHD10	coiled-coil-helix-coiled-coil-helix domain containing 10		11.2315	9.59515	9.97217	21.6509	14.082	43.8688	49.2353	46.8296	116.805	51.4492	68.8236	57.1881	4.24094	5.37624	6.3354	7.9191	4.84673	8.33583		25.0653	57.3014	83.6505	59.9376	72.667	74.8082	0.892227
ENSG00000113272	54974	THG1L	tRNA-histidine guanylyltransferase 1 like		15.6147	12.4936	15.6495	10.8821	11.5042	5.44797	3.93369	3.26231	3.77647	2.64407	3.04249	3.61967	19.088	12.7363	15.123	13.0466	15.4947	11.5584		8.25425	5.78282	4.68295	5.47816	4.78211	5.48351	0.892222
ENSG00000183576	84193	SETD3	SET domain containing 3, actin histidine methyltransferase		45.8891	46.0699	49.4921	36.5795	39.2366	52.2503	71.7033	96.6104	76.3563	65.558	86.8885	72.7977	45.4663	50.35	54.2425	48.484	44.6117	46.0092		64.7778	91.58	94.3708	91.0452	92.4965	89.6582	0.892175
ENSG00000157601	4599	MX1	MX dynamin like GTPase 1		1.3324	2.08259	1.73869	6.4998	4.41646	22.8815	15.2329	14.9943	23.031	37.9476	27.6821	34.6886	1.7832	1.99688	2.68167	3.53058	2.15076	4.27045		20.4799	13.9927	25.3461	21.822	24.1024	42.8015	0.892129
ENSG00000269990	---	---	---		0.960718	1.43137	1.79763	1.59539	1.91969	1.49191	1.77178	1.9068	1.96345	2.95702	2.45986	2.34116	3.41662	4.8819	4.73533	6.5404	6.69805	5.97504		5.39132	5.72948	7.46181	10.1779	9.93284	9.013	0.892118
ENSG00000205426	3887	KRT81	keratin 81		0	0	0	0	0	0	0	0	1.38035	0.761694	0.829674	0.698773	0	0	0	0	0	0		0	0	0.811417	0.946438	0.681411	1.0473	0.892111
ENSG00000204611	90317	ZNF616	zinc finger protein 616		22.0362	27.595	27.6352	17.5598	15.0297	8.69999	5.10968	6.37998	3.72696	2.99342	4.58045	3.39527	27.9024	15.6441	20.7991	20.4662	23.342	19.6225		8.75302	4.73856	3.5196	3.1763	3.86742	4.15336	0.891968
ENSG00000134910	3703	STT3A	STT3 oligosaccharyltransferase complex catalytic subunit A		83.9602	63.1228	69.1056	57.4582	54.8601	52.8872	33.8323	32.9589	29.7991	28.692	35.4185	39.574	118.949	70.9847	77.8895	79.854	67.3741	67.1179		50.2352	42.3606	36.4568	43.284	41.7711	39.0541	0.891943
ENSG00000135365	51317	PHF21A	PHD finger protein 21A		79.3016	106.473	101.821	89.4224	85.2849	79.4398	51.9545	28.4789	33.2705	27.1863	43.9322	40.2363	103.587	120.081	125.036	94.6801	110.602	108.361		92.8467	53.6335	41.3145	38.5967	39.4441	43.6256	0.891923
ENSG00000215397	85508	SCRT2	scratch family transcriptional repressor 2		48.3476	126.014	89.0759	111.043	43.99	10.0075	1.9745	1.19765	1.62066	2.57983	4.32214	3.286	4.73481	77.0506	92.9862	105.181	116.034	102.706		21.3523	1.18754	2.15858	2.41072	1.75781	2.87669	0.891914
ENSG00000135097	4440	MSI1	musashi RNA binding protein 1		257.167	79.9088	72.6371	89.5321	54.4361	33.1404	30.5453	7.29645	16.8648	6.84213	14.6307	7.18741	257.063	243.865	198.004	115.42	91.4541	78.3711		40.4545	20.6409	12.3351	6.67054	5.70379	9.05287	0.891852
ENSG00000118965	57539	WDR35	WD repeat domain 35		25.4941	26.3317	20.873	14.1126	16.8497	11.0133	14.4484	14.2258	10.6633	13.4422	14.9569	16.1419	80.5911	43.6469	42.8559	39.0619	33.6474	32.4649		23.4809	21.877	16.2696	18.6413	20.3808	21.4913	0.891829
ENSG00000077044	8527	DGKD	diacylglycerol kinase delta		72.47	268.594	236.437	193.189	181.093	152.191	93.6508	49.7643	27.6247	21.1775	28.1791	30.417	79.0792	103.752	157.013	167.475	158.161	133.308		150.892	60.4972	47.8202	48.6845	37.739	32.9095	0.891816
ENSG00000197296	128486	FITM2	fat storage inducing transmembrane protein 2		8.24959	14.9278	15.2799	16.7281	16.004	20.0318	16.9817	20.0288	18.8197	14.9009	20.4191	25.9939	7.08808	8.14367	10.065	13.4087	13.343	11.4345		11.5097	14.8309	14.2868	14.8652	17.5733	20.1838	0.891809
ENSG00000166582	201161	CENPV	centromere protein V		267.094	114.651	136.095	155.799	87.9466	52.7531	43.0195	27.5629	42.1296	22.3866	23.8534	28.0609	174.543	180.586	163.155	124.372	117.786	125.805		62.1751	39.7639	44.1215	51.2129	46.6645	40.0866	0.891747
ENSG00000087206	51720	UIMC1	ubiquitin interaction motif containing 1		43.885	42.5507	52.6353	33.6704	35.0759	17.048	14.1711	13.1717	14.6821	8.7902	10.4884	10.0704	43.9774	49.0326	57.5039	45.7836	49.1648	40.577		34.2762	28.1058	20.5011	23.764	22.6244	19.3807	0.891733
ENSG00000063015	124925	SEZ6	seizure related 6 homolog		178.755	759.006	594.478	454.808	432.949	324.381	137.194	126.684	58.3344	84.2662	101.75	79.8535	3.39797	183.572	563.017	393.046	610.216	408.463		252.227	149.727	143.089	59.9843	70.7584	73.6696	0.891687
ENSG00000131043	25980	AAR2	AAR2 splicing factor		43.3679	53.6575	54.1708	59.4065	46.2037	59.1566	34.63	26.066	25.6296	23.529	24.9097	21.6456	36.0394	38.5454	42.9624	44.7717	47.8859	47.3593		41.7978	33.9263	26.8932	32.4133	25.6304	23.2718	0.89168
ENSG00000198429	7620	ZNF69	zinc finger protein 69		3.65652	3.52006	2.3082	4.00642	1.84284	0.519653	0.835059	0.527331	0.408202	0	0.516632	0	16.8045	13.7318	10.5654	9.90281	12.8145	14.3005		2.43569	1.25345	0	1.11589	0.939168	1.27445	0.891626
ENSG00000004660	84254	CAMKK1	calcium/calmodulin dependent protein kinase kinase 1		16.9895	23.1588	23.8812	37.6919	43.1374	42.293	49.6704	125.529	69.9195	98.9826	183.949	219.16	11.295	28.0989	28.7628	35.1986	52.6276	38.3872		37.457	105.207	155.685	90.9252	143.471	251.669	0.891606
ENSG00000117448	10327	AKR1A1	aldo-keto reductase family 1 member A1		126.806	113.532	133.229	113.216	70.3168	98.5832	65.2955	56.5171	74.7258	52.1935	48.4101	51.0367	100.621	100.29	111.496	89.4032	95.8258	75.3826		55.7285	37.9039	52.0841	55.7343	51.5148	48.1656	0.891601
ENSG00000157851	56896	DPYSL5	dihydropyrimidinase like 5		473.747	1024.31	978.253	1232.66	1361.71	1205.75	363.192	184.165	132.301	96.0763	112.167	107.396	537.376	707.089	737.206	1026.83	1111.83	889.84		738.932	158.86	123.266	189.045	131.183	80.7049	0.891579
ENSG00000146112	170954	PPP1R18	protein phosphatase 1 regulatory subunit 18		97.9114	162.887	187.349	187.555	172.919	118.162	34.1312	16.1803	30.1522	18.7967	14.8504	10.399	72.0467	127.366	145.967	170.445	215.179	166.879		142.534	42.3159	21.1341	16.4055	16.2449	14.0614	0.891572
ENSG00000154781	51244	CCDC174	coiled-coil domain containing 174		24.2095	21.9198	22.2866	20.3335	17.6533	11.5497	8.49704	9.7451	7.17358	8.44431	10.0034	9.22635	23.8372	26.627	29.1245	21.6748	24.051	25.5798		19.3103	14.5769	10.538	14.5076	13.2121	13.6285	0.891559
ENSG00000119242	80212	CCDC92	coiled-coil domain containing 92		37.8796	75.678	73.2045	87.1457	91.3557	78.5346	88.6297	86.7681	101.802	95.9617	146.616	168.144	35.1774	64.1936	61.7005	76.833	92.9517	77.7563		82.8893	121.813	132.746	128.779	149.72	193.754	0.891553
ENSG00000204650	147081	LINC02210	long intergenic non-protein coding RNA 2210		26.8582	30.4345	23.2598	26.029	20.5506	14.0642	11.2259	12.3394	9.90268	10.9382	11.7576	15.5012	35.2516	47.3849	43.8481	44.7216	50.9344	51.6448		22.9294	21.8447	20.5119	25.2625	22.0792	24.2714	0.891548
ENSG00000173918	114897	C1QTNF1	C1q and TNF related 1		0.832847	0.961613	0.497476	1.01589	1.78652	13.9636	17.6085	13.6173	33.7757	17.6819	20.9353	10.3608	2.27154	1.53111	1.05796	1.59152	0.674554	1.3525		13.0562	16.0412	21.2934	11.9787	6.24991	6.05005	0.891531
ENSG00000127588	51764	GNG13	G protein subunit gamma 13		0	0	0	0.40511	0	0	0	0	0.635778	1.91459	4.8703	5.5276	0	0	0	0	0	0		0	0.836647	2.63183	2.76242	4.48727	13.1402	0.891477
ENSG00000183785	51807	TUBA8	tubulin alpha 8		0	0	0	0.560285	0	0.653757	0.547725	1.54273	0.663493	1.81884	1.2058	2.22323	0	0.513249	0.580493	0.701167	0.964025	0.688045		0.84932	1.54444	1.12584	1.08149	1.58252	2.13939	0.891448
ENSG00000204604	90333	ZNF468	zinc finger protein 468		11.3035	22.2681	24.8602	18.1098	13.3588	4.91156	6.61023	3.92132	1.54818	2.9131	3.4037	3.27498	13.2359	9.49056	16.2363	20.0274	22.1906	19.4815		8.49096	8.58963	4.81742	3.26924	4.12043	4.16444	0.891417
ENSG00000136161	1102	RCBTB2	RCC1 and BTB domain containing protein 2		57.9795	47.0007	49.4774	41.7667	38.1737	20.5347	37.2038	20.5652	23.9698	17.0321	15.9376	14.7298	69.0361	53.5383	48.6988	60.5193	60.2902	57.8264		34.3669	25.8412	21.1941	22.4802	19.9826	16.6139	0.891412
ENSG00000135722	55336	FBXL8	F-box and leucine rich repeat protein 8		0	0	0	0	0.437977	1.25722	0.94467	0.405272	1.32974	1.01319	1.10763	1.22176	0	0	0	0	0	0		0.538229	0.583265	0.579856	0.675668	0.647132	0.761597	0.891408
ENSG00000230734	---	---	---		76.0735	34.0827	58.647	67.2817	26.7655	45.2768	11.7326	1.307	0.411722	0	2.5813	1.0048	0.410362	0.513649	0.466281	0.636697	0.408865	0.426475		0	0	0	0	0	0	0.891294
ENSG00000198492	51441	YTHDF2	YTH N6-methyladenosine RNA binding protein 2		112.348	142.274	160.351	97.7837	98.4853	57.9832	44.4555	49.4137	45.2245	42.6584	54.4317	51.963	112.956	103.547	117.092	101.424	114.992	100.846		54.4106	53.3838	45.757	43.2839	51.1928	58.1194	0.891272
ENSG00000064703	11218	DDX20	DEAD-box helicase 20		34.2032	34.346	34.0049	20.1004	18.8976	8.36473	10.2025	15.6828	8.97684	12.9082	10.3313	10.5265	40.7845	33.8568	35.866	30.5802	30.0789	28.4264		18.9004	21.1465	11.1182	9.93398	14.0095	14.6447	0.891267
ENSG00000159131	2618	GART	phosphoribosylglycinamide formyltransferase, phosphoribosylglycinamide synthetase, phosphoribosylaminoimidazole synthetase		119.911	101.036	111.981	75.4334	72.5355	46.819	33.8644	25.5477	23.3779	26.9569	25.6676	28.5679	135.877	89.739	111.947	94.3075	100.039	93.5885		60.4061	42.2491	23.8516	28.8541	30.1439	33.6562	0.891168
ENSG00000116489	829	CAPZA1	capping actin protein of muscle Z-line subunit alpha 1		133.686	75.3646	69.0293	40.5983	43.3508	50.004	50.106	63.3478	54.9784	73.4427	56.8276	56.2645	163.47	112.042	88.2594	77.2878	66.6819	67.5181		57.9389	76.8681	52.3571	79.7335	76.6911	70.5106	0.891138
ENSG00000107338	6461	SHB	SH2 domain containing adaptor protein B		31.124	42.3918	37.2482	37.221	21.5401	20.8029	9.5116	6.9358	13.3714	4.98499	7.43323	8.05202	8.97293	16.774	33.4933	26.6541	24.8182	21.54		13.2455	7.48073	8.04323	13.874	12.0716	5.75861	0.891093
ENSG00000158691	9753	ZSCAN12	zinc finger and SCAN domain containing 12		27.1994	23.9949	22.7434	15.0037	13.9601	6.3867	5.07673	3.41092	4.39328	3.37629	4.88651	5.32276	47.1604	26.3583	31.5657	29.4385	26.2444	28.3236		16.4911	7.03036	5.0575	5.39694	5.24165	7.27667	0.891069
ENSG00000100092	23616	SH3BP1	SH3 domain binding protein 1		2.99543	0.980937	0.583234	1.43455	0.478837	2.46416	1.52168	2.9035	6.26374	4.62962	6.59978	7.15024	9.68316	2.93198	3.28796	1.84942	0.878523	2.61246		5.94719	10.5344	10.1462	10.2792	14.3021	13.7031	0.891035
ENSG00000186532	114826	SMYD4	SET and MYND domain containing 4		15.2395	13.0972	8.96921	14.6038	11.0721	9.97398	8.02939	6.37914	7.17505	6.61217	9.55787	10.4462	33.9033	18.4656	20.3652	14.4816	17.5766	18.2518		9.24727	8.23193	9.07384	9.74085	10.8675	13.1594	0.890983
ENSG00000135549	5570	PKIB	cAMP-dependent protein kinase inhibitor beta		0	0	0	0.471828	1.09589	5.78323	4.44162	5.41363	3.13201	8.09017	5.00509	5.46408	0.602868	0.821528	0	1.17012	0	0.834211		6.95305	6.99293	6.34042	7.79292	10.6003	6.75387	0.890925
ENSG00000115596	7475	WNT6	Wnt family member 6		0	0	0	0	0	0.486127	1.23034	2.92055	2.04815	2.76954	2.20668	0.860204	0.572611	0	0	0	0	0		0	1.7416	1.72107	1.23126	0.919688	0	0.890878
ENSG00000087266	6452	SH3BP2	SH3 domain binding protein 2		40.3182	101.668	78.9202	134.79	103.19	77.4953	70.5361	17.4438	42.3462	15.5565	23.8448	12.0639	74.761	148.074	167.462	185.377	237.655	183.683		140.597	85.2138	25.8774	15.735	16.8876	19.9996	0.890864
ENSG00000170085	375484	SIMC1	SUMO interacting motifs containing 1		29.1713	33.269	30.9359	28.8587	24.9989	27.1393	17.4191	15.3296	9.39242	9.69223	13.2451	13.4784	38.0589	33.7748	38.6531	36.5144	41.9134	27.2982		32.2762	26.8561	18.3254	11.0334	14.3888	17.7955	0.890818
ENSG00000011007	6924	ELOA	elongin A		57.5192	78.4002	69.9567	59.9815	62.1118	32.7717	27.771	28.7416	25.1566	27.512	30.1715	26.2459	82.396	74.8473	84.5989	87.355	90.6248	88.7236		68.7537	39.4054	37.1644	36.3199	38.0168	37.9076	0.890814
ENSG00000134602	51765	STK26	serine/threonine kinase 26		18.0778	0.656156	0.584517	0.422085	0	0.452601	0.482842	1.20923	0.872985	3.28097	1.75189	2.0105	56.374	12.4977	5.98946	2.44624	0	0.694048		0.897352	2.24149	0.947926	1.88666	2.3122	1.48971	0.890773
ENSG00000100997	26090	ABHD12	abhydrolase domain containing 12		46.512	51.4267	52.4827	64.98	56.98	103.009	146.473	182.639	185.838	170.463	184.606	185.904	34.1653	42.3073	44.4041	48.5027	48.2461	37.8959		65.1689	113.734	195.549	188.267	178.975	160.661	0.890761
ENSG00000107341	54926	UBE2R2	ubiquitin conjugating enzyme E2 R2		262.126	210.234	230.496	154.409	174.119	168.351	95.4298	97.1508	82.2687	85.2598	104.943	95.9801	221.426	183.635	196.042	183.618	177.107	148.965		128.936	108.631	117.747	97.9901	94.9097	96.4217	0.890711
ENSG00000145022	6988	TCTA	T cell leukemia translocation altered		9.83159	15.7492	16.2504	22.1814	22.6026	31.6988	62.6211	53.1238	71.3188	63.4752	53.1355	53.3676	9.60865	14.0918	14.6899	21.0127	19.4806	20.555		33.7704	59.4897	63.4681	65.0296	64.2984	57.0506	0.890697
ENSG00000169375	25942	SIN3A	SIN3 transcription regulator family member A		123.885	109.955	108.896	75.1449	67.9234	46.2491	37.6589	32.1512	24.6226	35.0318	45.0965	44.4069	168.168	94.4953	118.122	98.4621	97.3727	88.4336		60.5163	40.7059	36.0702	30.171	36.2284	46.9069	0.890682
ENSG00000162613	8880	FUBP1	far upstream element binding protein 1		305.713	288.816	297.921	163.7	176.105	87.1508	60.3648	64.0938	39.8926	39.4918	51.7581	56.1579	399.36	272.348	287.982	269.586	287.253	280.778		148.074	95.362	74.1828	73.7635	81.9241	81.2387	0.89066
ENSG00000158286	388591	RNF207	ring finger protein 207		0	0.757631	0.407314	2.87219	4.68046	7.76127	4.24397	2.86571	3.6378	2.17487	3.55042	5.68948	3.18566	5.88961	2.49025	7.51716	17.6544	14.7836		17.3298	15.6907	12.8211	10.9578	16.1372	23.5008	0.890642
ENSG00000112079	11329	STK38	serine/threonine kinase 38		35.9003	34.2994	25.3853	34.8156	27.6847	14.5	17.0742	6.92064	14.9473	6.24014	10.7351	9.40034	71.4348	93.5018	75.2829	58.5402	63.5348	64.6278		36.3718	43.6555	22.8641	28.7768	28.0878	23.2085	0.89061
ENSG00000078902	54472	TOLLIP	toll interacting protein		48.8042	85.6506	80.9649	102.102	90.9539	164.328	213.169	501.783	318.913	351.443	473.077	458.055	33.1583	46.2802	49.465	70.0747	70.8747	66.424		95.7511	256.44	373.034	231.028	326.532	390.199	0.890581
ENSG00000155660	9601	PDIA4	protein disulfide isomerase family A member 4		118.458	76.7937	85.3886	61.6912	51.0812	71.8294	48.03	53.9528	47.3111	30.254	33.164	34.3281	176.148	95.7286	93.4958	89.0651	56.2452	65.6606		53.6327	53.4248	31.3472	39.0945	32.1149	25.8619	0.890565
ENSG00000149948	8091	HMGA2	high mobility group AT-hook 2		267.839	8.85223	6.21185	1.80429	0.418095	0	0	0	0	0.507205	0	0	688.235	116.085	61.1427	8.82595	2.90915	1.72708		0.598057	0	0	0	0	0	0.890543
ENSG00000154380	55740	ENAH	ENAH actin regulator		258.835	291.859	280.786	154.658	187.709	102.003	114.468	72.6456	73.1765	68.7275	91.6521	68.5801	427.188	254.961	239.396	221.573	229.614	223.45		134.172	115.498	70.4841	72.0378	56.1808	67.0354	0.890495
ENSG00000120784	22835	ZFP30	ZFP30 zinc finger protein		27.2619	41.3972	37.1163	30.3843	28.9313	7.56011	7.9359	7.94459	5.15215	3.82161	6.60516	7.27967	22.8147	23.2107	26.8958	28.265	40.4772	32.8292		12.1718	7.83158	3.98674	4.55623	5.75694	6.75934	0.890492
ENSG00000182253	23336	SYNM	synemin		6.93357	6.26718	5.07448	19.8328	32.2391	47.0537	48.5327	64.5361	62.3894	64.7831	128.13	104.212	6.37428	10.6369	7.88036	30.7491	9.67921	29.7409		75.3156	82.6938	108.923	115.591	112.518	150.74	0.890379
ENSG00000188906	120892	LRRK2	leucine rich repeat kinase 2		1.56418	2.92504	2.35207	3.46695	5.94891	10.1081	21.4582	27.8921	15.8804	31.5495	34.3924	32.7146	2.39341	2.81026	2.92237	7.89879	8.61153	9.25514		17.1164	35.4378	24.6021	21.0262	28.2915	39.6221	0.890373
ENSG00000110777	5450	POU2AF1	POU class 2 homeobox associating factor 1		0	0	0	0	0	0	0	0	0.46832	1.326	0	0.564723	0	0	0	0	0	0		0	0	0	3.05509	0.569896	0.48758	0.890333
ENSG00000182831	29035	C16orf72	chromosome 16 open reading frame 72		91.142	92.9904	99.2833	64.5684	62.943	43.5335	49.1362	66.5208	36.1221	40.4249	61.1644	47.9899	78.2412	68.0728	78.8666	80.3902	68.0706	67.2236		47.9415	70.8732	41.4578	42.5754	47.2284	41.126	0.890287
ENSG00000168564	55602	CDKN2AIP	CDKN2A interacting protein		50.0375	40.7966	45.658	32.042	28.9666	21.1046	17.6806	17.2725	13.5626	16.1428	18.4155	17.5109	42.9474	34.9788	33.8825	31.0318	31.2581	33.3065		22.5192	21.523	14.9132	16.116	18.2411	16.2659	0.890248
ENSG00000104808	27294	DHDH	dihydrodiol dehydrogenase		0	0	0	0.715403	0.70385	4.00636	4.07597	3.91767	3.02198	3.59536	2.9009	2.06562	0.462609	0.81561	0	0.700932	0.432971	0.712739		4.53634	2.37005	3.59525	2.55644	2.11522	2.09489	0.890206
ENSG00000229481	---	---	---		4.61551	11.7708	11.0877	17.8097	21.7575	11.248	9.74622	7.02985	2.40321	2.28574	4.01663	3.16939	6.81722	7.44577	8.6212	15.5578	18.5012	16.3187		13.8808	6.91031	3.83149	1.45604	2.78079	3.57722	0.890143
ENSG00000102468	3356	HTR2A	5-hydroxytryptamine receptor 2A		11.0203	1.79254	1.91387	5.7644	5.37356	5.24682	22.539	65.0125	26.1232	66.8118	89.2933	73.1018	0.574294	4.05966	5.23425	8.53398	2.84321	6.52264		5.81542	30.8331	38.6294	43.872	57.6248	73.535	0.890055
ENSG00000171469	93134	ZNF561	zinc finger protein 561		16.945	16.2645	15.6262	14.3455	10.9293	6.18554	4.84422	4.96643	4.39535	6.74406	5.5156	5.54865	46.5688	27.4435	33.373	34.7049	38.7277	33.6004		15.7373	13.282	8.39038	10.2394	9.88327	10.8667	0.890011
ENSG00000119777	54867	TMEM214	transmembrane protein 214		24.269	17.9945	18.0278	22.8478	23.1195	46.4838	33.6019	35.3602	37.7024	37.1581	46.8091	48.8885	45.7558	31.1956	29.2548	34.2696	30.144	32.3153		39.262	38.2789	36.7846	39.8841	39.1213	45.7367	0.88999
ENSG00000196503	132946	ARL9	ADP ribosylation factor like GTPase 9		2.84734	7.48118	9.69146	8.49786	7.77207	5.41445	0.826774	1.39391	1.5497	1.57774	2.15222	1.85268	1.92299	4.61559	4.91343	8.11614	8.03027	7.6676		4.36419	1.34863	2.5473	1.95356	1.71403	2.35343	0.889955
ENSG00000169981	7584	ZNF35	zinc finger protein 35		12.795	15.4935	14.27	12.4312	10.455	3.06763	6.63048	6.65692	7.18464	5.55933	6.44624	5.68795	13.5725	11.6038	13.8438	13.6512	14.562	14.4314		6.56487	7.39597	5.04274	6.5614	7.23668	6.73367	0.889952
ENSG00000160310	3275	PRMT2	protein arginine methyltransferase 2		153.847	234.057	274.546	315.731	282.555	236.911	141.033	151.656	119.273	90.0076	116.96	124.825	95.0401	168.664	177.067	255.915	273.217	262.742		211.049	135.826	142.179	146.707	147.595	144.645	0.889904
ENSG00000189369	23708	GSPT2	G1 to S phase transition 2		47.2906	56.6169	66.3034	43.0524	45.0566	27.374	21.4202	24.0024	14.7314	17.941	22.647	21.4657	38.7654	47.6731	47.0322	42.3887	40.894	37.6752		29.9569	27.2647	20.2564	13.5881	23.1111	26.5316	0.88987
ENSG00000261340	106456574	LINC01616	long intergenic non-protein coding RNA 1616		0	0	0	0	0	0.452601	1.20642	2.57788	2.61089	2.80783	4.82703	3.08957	0	0	0	0	0.636702	0.491522		1.54723	7.08387	5.25042	3.73745	5.81667	7.32217	0.889807
ENSG00000147117	7712	ZNF157	zinc finger protein 157		1.14006	2.63269	2.34826	2.10131	1.41806	0.955491	0.754071	0.706386	0.51313	0	0.503993	0.524712	1.83811	1.69172	3.23357	2.97451	3.88382	3.20865		1.65049	0.634464	0.556056	0.848662	0.639724	0.742695	0.889786
ENSG00000137478	9873	FCHSD2	FCH and double SH3 domains 2		75.7453	109.423	111.005	66.5535	88.4543	109.58	77.4177	35.8483	47.3532	30.3121	42.3615	39.5103	79.6844	96.6689	123.302	121.419	124.076	116.511		115.019	53.2214	49.2455	51.9235	42.759	47.7827	0.889784
ENSG00000134020	157310	PEBP4	phosphatidylethanolamine binding protein 4		0	0	0	0	0	1.9948	1.63511	2.33384	6.12098	3.90204	3.29473	3.4453	0	0	0	0	0	0		1.35294	3.92671	4.87611	4.23331	6.26712	5.0592	0.889764
ENSG00000179083	286499	FAM133A	family with sequence similarity 133 member A		0.493219	1.05088	1.00771	1.04801	1.76443	1.29075	1.00228	3.39979	2.02671	3.33193	4.85439	5.02085	1.56543	2.46799	0.817506	1.59686	2.41394	1.11055		2.38519	3.67046	5.15333	5.34672	7.52993	8.11274	0.889719
ENSG00000156697	10813	UTP14A	UTP14A small subunit processome component		20.0749	19.5052	19.8226	18.9256	17.7898	9.63872	9.55375	11.8533	8.81541	10.727	9.92177	10.6363	28.0581	25.635	28.03	22.6412	25.7547	20.9333		16.5292	17.1256	15.1352	12.4424	17.0067	19.3029	0.889639
ENSG00000133794	406	ARNTL	aryl hydrocarbon receptor nuclear translocator like		7.06433	14.7515	15.7906	10.7774	16.2233	28.7485	37.4983	48.5358	28.3254	42.3018	46.1632	47.6586	5.38494	7.11626	12.1686	18.8368	20.4626	17.4169		40.8307	50.133	53.4706	38.2032	45.9303	51.8716	0.889627
ENSG00000143158	25874	MPC2	mitochondrial pyruvate carrier 2		34.9735	32.7647	48.2214	35.1147	44.0725	51.1439	80.5225	85.5154	96.3037	101.381	83.4226	66.9508	23.0869	39.4032	41.3054	46.7822	59.6093	46.5399		70.8573	111.066	139.36	116.154	129.121	109.328	0.889552
ENSG00000102221	9767	JADE3	jade family PHD finger 3		43.6799	30.994	39.2406	19.3867	18.7334	6.21907	6.84054	5.35744	6.54102	5.18893	5.25994	6.23492	50.3624	29.0542	33.4843	35.1247	28.5443	27.3705		13.6425	7.25924	5.28242	9.65926	7.17279	4.79681	0.889534
ENSG00000124104	90203	SNX21	sorting nexin family member 21		7.06299	8.87625	7.13164	16.3121	15.5518	29.4191	23.1914	20.7581	27.1034	24.3933	28.94	25.6939	10.6452	12.0105	11.2923	16.732	17.6056	19.714		25.8733	21.9315	40.8814	41.9193	33.8976	35.7032	0.889502
ENSG00000232229	643529	LINC00865	long intergenic non-protein coding RNA 865		4.75837	7.20806	8.96693	7.74338	7.51472	1.82717	1.01988	0.480089	0.760458	0.461091	0.518998	0.562329	7.89591	21.3865	30.9939	44.2111	64.0704	59.0172		24.2249	6.45057	5.19929	5.79567	3.56461	7.24058	0.889421
ENSG00000171466	54811	ZNF562	zinc finger protein 562		15.1357	23.1424	20.0009	16.7567	13.5119	6.55433	7.36777	6.47217	5.06633	4.71539	6.12353	6.77709	44.0071	27.0093	36.5193	39.4545	47.8791	35.8468		18.0252	13.6246	9.16136	13.7437	11.7491	13.6721	0.889388
ENSG00000127589	---	---	---		94.1131	117.423	144.392	96.4142	91.2298	65.1578	20.2073	47.7951	10.757	14.7397	14.2773	11.2527	57.0287	48.2814	63.6051	57.0741	76.0452	58.3636		26.394	7.79918	5.47627	4.56292	6.07275	7.15308	0.889369
ENSG00000175061	125144	SNHG29	small nucleolar RNA host gene 29		606.129	528.489	740.959	491.034	331.246	551.586	269.982	122.277	172.809	81.4834	91.4081	73.9437	477.772	605.034	818.739	682.972	566.956	622.913		515.607	197.258	222.412	131.215	155.372	144.979	0.889293
ENSG00000212802	---	---	---		54.9533	58.8129	61.5026	54.5408	34.4099	54.7312	32.6619	30.271	21.6496	19.8117	20.2112	18.7696	22.7704	18.3769	19.1496	22.4755	22.4191	17.6524		19.1602	8.59705	7.34721	6.36799	7.43943	6.99096	0.889279
ENSG00000219200	440400	RNASEK	ribonuclease K		0.660415	0.63481	0.517436	1.20044	1.33835	1.65954	1.83502	2.06847	2.27994	2.67646	2.21189	2.43227	1.1943	1.17394	0.874925	0.993392	0.841653	1.24776		1.85143	2.06804	2.04451	1.98724	2.34028	2.73563	0.889253
ENSG00000185049	7469	NELFA	negative elongation factor complex member A		57.46	46.5496	52.502	61.3841	51.0256	54.1277	32.2038	20.1214	24.9795	14.2524	23.058	18.3694	55.8061	62.1248	57.1509	44.6161	52.4351	42.5578		43.3201	27.3669	32.4341	27.9175	24.7233	23.4762	0.889234
ENSG00000067057	5214	PFKP	phosphofructokinase, platelet		36.0116	72.8776	89.3115	144.81	180.301	366.422	150.137	239.281	176.136	184.278	249.247	304.839	20.7394	43.1438	56.6194	76.9668	108.327	93.0005		199.842	218.149	141.947	114.995	197.886	305.927	0.889226
ENSG00000161021	9794	MAML1	mastermind like transcriptional coactivator 1		81.2959	58.4173	44.3527	64.0012	43.6483	36.6942	27.6926	11.1468	17.0506	13.9322	23.8364	22.3312	160.188	97.972	106.124	96.7237	101.184	91.5226		56.9846	35.3037	24.9281	36.7032	28.4118	30.077	0.889222
ENSG00000268654	100073347	MIMT1	MER1 repeat containing imprinted transcript 1		4.63699	1.64913	1.05773	0.586559	0.712693	1.08959	0	1.22607	0	0	0.800702	0.796239	3.30901	4.35432	3.01279	2.1536	0.694915	0.419862		1.14142	1.27131	1.09255	0.568117	1.66014	1.48883	0.889216
ENSG00000100744	51527	GSKIP	GSK3B interacting protein		25.6149	22.2759	26.2978	17.2263	20.4701	15.7069	22.9636	44.7932	37.2669	40.0744	42.0019	46.972	26.6116	22.7912	16.1116	17.8666	21.0865	17.4017		15.7339	31.6654	25.6976	32.0592	41.3128	37.2194	0.889199
ENSG00000225978	---	---	---		0	0	0	1.36945	0.815447	8.13005	7.9912	8.18524	11.2867	9.06371	15.9322	11.7409	0	0.800558	0	2.56855	0	0.7		3.05083	10.2403	11.7869	6.2564	10.2582	11.5436	0.889164
ENSG00000144026	84874	ZNF514	zinc finger protein 514		10.8115	11.8257	10.9827	11.4509	11.7705	9.43757	5.97524	5.29756	4.0313	4.37583	6.0313	7.47835	37.3023	29.8853	37.0445	28.8465	44.92	33.2023		20.1569	22.6589	11.0732	19.5867	19.4132	22.6178	0.889077
ENSG00000168918	3635	INPP5D	inositol polyphosphate-5-phosphatase D		4.216	6.82989	4.41433	4.30479	5.01729	24.0884	15.2171	12.2803	15.9901	11.6264	10.3937	11.7568	4.99286	5.57111	8.34573	8.12716	5.51658	9.56008		15.7914	21.2326	21.8376	17.6804	16.1982	11.9698	0.889054
ENSG00000100330	8897	MTMR3	myotubularin related protein 3		97.6021	150.694	126.995	127.948	124.315	87.989	72.3146	51.1227	46.2082	53.602	71.5038	60.5076	106.586	109.512	132.52	135.481	167.069	145.763		109.321	63.6302	40.2286	38.8784	40.4075	61.0321	0.889053
ENSG00000100813	22985	ACIN1	apoptotic chromatin condensation inducer 1		191.862	176.839	189.156	245.379	210.852	102.506	95.1047	74.1362	79.2926	54.473	78.9548	85.1085	461.54	423.135	381.233	308.095	323.535	342.388		206.774	171.655	124.121	142.912	142.389	139.121	0.889027
ENSG00000156858	78994	PRR14	proline rich 14		56.8109	57.4115	55.7324	74.3666	62.9288	69.4826	47.8731	27.1683	40.7693	19.2685	26.2651	20.1742	48.7865	87.1658	82.4695	67.4152	77.5555	76.5315		72.1233	46.5697	47.5741	47.7656	40.7275	32.4809	0.889001
ENSG00000187556	342977	NANOS3	nanos C2HC-type zinc finger 3		2.80595	5.10911	7.04501	14.9317	9.72917	15.5058	19.1516	17.3098	26.4816	10.3514	8.37844	4.93077	0	2.89064	2.16497	3.8395	7.19658	6.88109		11.1972	11.3126	15.9996	10.3508	9.44242	5.82729	0.888876
ENSG00000154188	284	ANGPT1	angiopoietin 1		1.26203	0.742093	0.737346	0.548692	0.96842	8.53236	6.45637	3.98395	3.30342	2.08202	2.73046	2.54166	7.97066	2.07216	0.899469	2.04176	0.435745	2.16616		9.01389	3.42061	3.02117	1.76016	1.56032	2.0736	0.888839
ENSG00000133895	4221	MEN1	menin 1		55.1679	62.8216	60.9484	74.612	62.943	73.6734	44.8357	36.3612	33.947	29.4086	39.7286	41.7786	74.2515	77.9788	81.549	70.5497	73.9787	67.6009		61.8739	44.6066	48.0187	39.3776	44.0961	46.2992	0.888799
[truncated: 18,219 more rows]

## Sheet: CB_gene_exp_cor
ensembl	entrez	symbol	genename	mean.1	mean.2A.BS	mean.2B.BS	mean.3A.BS	mean.3B.BS	mean.4.BS	mean.5	mean.6.BS	mean.7.BS	mean.8.BS	mean.9.BS	mean.10.BS	mean.11.BS	CM.mean.1	CM.mean.2A	CM.mean.2B	CM.mean.3A	CM.mean.3B	CM.mean.4	CM.mean.5	CM.mean.6	CM.mean.7	CM.mean.8	CM.mean.9	CM.mean.10	CM.mean.11	core
[truncated: 19,441 more rows]
