# Supplementary material for: Transposable elements and their KZFP controllers are drivers of transcriptional innovation in the developing human brain
Source: HighWire-hosted journal article supplement (doi:10.1101/gr.275133.120), 2021-08-16
Supplement: Supplemental_Table_S3.xlsx [file Supplemental_Table_S3.xlsx]

## Sheet: Legend
Supplemental Table S3 – Differential gene expression analysis between adult (stage 11) and early prenatal stages (stage 2A to 3B) for DFC and CB in both Brainspan (BS) and Cardoso (CM) datasets.

## Sheet: DFC_DE_A_vs_EP
ensembl	entrez	symbol	genename	mean.A.BS	mean.EP.BS	mean.both.BS	foldChange.BS	padj.BS	diffExpr.BS	mean.A.CD	mean.EP.CD	mean.both.CD	foldChange.CD	padj.CD	diffExpr.CD
ENSG00000000003	7105	TSPAN6	tetraspanin 6	177.413	774.981	476.197	-4.36824	2.7303e-05	Yes	247.613	1092.96	670.288	-4.414	1.88169e-07	Yes
ENSG00000000005	64102	TNMD	tenomodulin	4.27043	1.3453	2.80787	3.17432	0.0238456	Yes	6.71513	2.97322	4.84418	2.25854	0.0206553	Yes
ENSG00000000419	8813	DPM1	dolichyl-phosphate mannosyltransferase subunit 1, catalytic	352.714	424.442	388.578	-1.20336	0.539778	No	888.946	739.262	814.104	1.20248	0.0924132	No
ENSG00000000457	57147	SCYL3	SCY1 like pseudokinase 3	185.16	233.089	209.124	-1.25885	0.229013	No	358.747	428.569	393.658	-1.19463	0.0143029	No
ENSG00000000460	55732	C1orf112	chromosome 1 open reading frame 112	29.4657	100.986	65.226	-3.42725	0.00131008	Yes	77.2606	407.963	242.612	-5.28035	2.77516e-08	Yes
ENSG00000000938	2268	FGR	FGR proto-oncogene, Src family tyrosine kinase	83.2278	22.2062	52.717	3.74795	0.000294928	Yes	158.137	34.304	96.2206	4.60987	1.14827e-07	Yes
ENSG00000000971	3075	CFH	complement factor H	274.682	87.3946	181.038	3.14301	0.121503	No	366.676	282.857	324.767	1.29633	0.573839	No
ENSG00000001036	2519	FUCA2	alpha-L-fucosidase 2	276.94	188.786	232.863	1.46696	0.125179	No	431.899	434.868	433.383	-1.00688	0.967519	No
ENSG00000001084	2729	GCLC	glutamate-cysteine ligase catalytic subunit	923.845	335.996	629.921	2.74957	2.00231e-05	Yes	1197.57	543.594	870.584	2.20306	5.48774e-08	Yes
ENSG00000001167	4800	NFYA	nuclear transcription factor Y subunit alpha	515.963	3158.45	1837.21	-6.12148	1.15782e-06	Yes	539.245	2055.32	1297.28	-3.81149	3.41772e-07	Yes
ENSG00000001460	90529	STPG1	sperm tail PG-rich repeat containing 1	674.455	62.743	368.599	10.7495	2.2996e-09	Yes	831.169	112.113	471.641	7.4137	1.32046e-06	Yes
ENSG00000001461	57185	NIPAL3	NIPA like domain containing 3	4366.16	347.104	2356.63	12.5788	2.98648e-09	Yes	3337.02	345.941	1841.48	9.64622	9.51665e-13	Yes
ENSG00000001497	81887	LAS1L	LAS1 like, ribosome biogenesis factor	494.586	730.152	612.369	-1.47629	0.0367257	No	1450.47	1872.56	1661.52	-1.291	0.00941202	No
ENSG00000001561	22875	ENPP4	ectonucleotide pyrophosphatase/phosphodiesterase 4	1294.11	229.989	762.049	5.62682	1.9463e-06	Yes	1347.12	258.274	802.7	5.21586	1.85503e-10	Yes
ENSG00000001617	6405	SEMA3F	semaphorin 3F	133.364	1198.49	665.927	-8.9866	3.33068e-08	Yes	123.728	1428.71	776.218	-11.5471	2.15502e-15	Yes
ENSG00000001626	1080	CFTR	cystic fibrosis transmembrane conductance regulator	17.8774	6.1512	12.0143	2.90632	0.0714126	No	12.4817	3.6854	8.08357	3.38681	0.0166215	Yes
ENSG00000001629	54467	ANKIB1	ankyrin repeat and IBR domain containing 1	1514.5	1923.24	1718.87	-1.26989	0.282549	No	1313.34	2206.86	1760.1	-1.68035	0.00435533	No
ENSG00000001630	1595	CYP51A1	cytochrome P450 family 51 subfamily A member 1	96.3237	380.605	238.464	-3.95131	7.38891e-05	Yes	33.395	54.893	44.144	-1.64375	0.232688	No
ENSG00000001631	889	KRIT1	KRIT1 ankyrin repeat containing	503.626	451.118	477.372	1.1164	0.536186	No	826.262	703.325	764.793	1.17479	0.234436	No
ENSG00000002016	5893	RAD52	RAD52 homolog, DNA repair protein	99.0645	111.068	105.066	-1.12117	0.776617	No	347.262	654.362	500.812	-1.88435	2.37833e-05	No
ENSG00000002330	572	BAD	BCL2 associated agonist of cell death	693.715	586.882	640.299	1.18204	0.454701	No	1342.42	838.271	1090.35	1.60142	0.0339963	No
ENSG00000002549	51056	LAP3	leucine aminopeptidase 3	825.562	613.279	719.421	1.34614	0.0346617	No	941.517	591.891	766.704	1.59069	4.13653e-05	No
ENSG00000002587	9957	HS3ST1	heparan sulfate-glucosamine 3-sulfotransferase 1	216.501	387.221	301.861	-1.78854	0.180145	No	204.705	211.797	208.251	-1.03464	0.919367	No
ENSG00000002745	51384	WNT16	Wnt family member 16	31.2816	4.56754	17.9246	6.84867	0.00736982	Yes	27.7433	6.68892	17.2161	4.14766	0.00345892	Yes
ENSG00000002746	23072	HECW1	HECT, C2 and WW domain containing E3 ubiquitin protein ligase 1	2260.5	2734.36	2497.43	-1.20963	0.401323	No	2203.83	2020.79	2112.31	1.09058	0.589554	No
ENSG00000002822	8379	MAD1L1	mitotic arrest deficient 1 like 1	472.109	752.767	612.438	-1.59448	0.00662726	No	464.338	730.343	597.34	-1.57287	0.00642556	No
ENSG00000002834	3927	LASP1	LIM and SH3 protein 1	3518.51	6864.09	5191.3	-1.95085	4.62485e-05	No	4339.18	6821.48	5580.33	-1.57207	2.79812e-05	No
ENSG00000002919	29916	SNX11	sorting nexin 11	796.311	540.479	668.395	1.47334	0.0185943	No	661.44	475.461	568.45	1.39116	0.00201432	No
ENSG00000002933	55365	TMEM176A	transmembrane protein 176A	144.019	8.9844	76.502	16.0299	2.57909e-05	Yes	138.855	14.5246	76.6899	9.56001	3.846e-07	Yes
ENSG00000003056	4074	M6PR	mannose-6-phosphate receptor, cation dependent	1008.45	472.48	740.465	2.13438	4.2603e-05	Yes	1552.89	687.982	1120.44	2.25717	2.88836e-11	Yes
ENSG00000003096	90293	KLHL13	kelch like family member 13	171.961	440.542	306.252	-2.56187	0.000561852	Yes	186.9	610.415	398.658	-3.266	0.000547259	Yes
ENSG00000003137	56603	CYP26B1	cytochrome P450 family 26 subfamily B member 1	1103.68	232.684	668.181	4.74325	0.000346193	Yes	811.356	296.109	553.732	2.74006	0.0175725	Yes
ENSG00000003147	3382	ICA1	islet cell autoantigen 1	869.654	240.4	555.027	3.61753	6.78922e-05	Yes	1734.56	350.178	1042.37	4.95338	7.46056e-11	Yes
ENSG00000003249	79007	DBNDD1	dysbindin domain containing 1	2805.56	1548.2	2176.88	1.81214	0.0180948	No	2899.4	1563.9	2231.65	1.85395	0.00021067	No
ENSG00000003393	57679	ALS2	alsin Rho guanine nucleotide exchange factor ALS2	1443.26	1760.78	1602.02	-1.22	0.295482	No	1964.25	1881.19	1922.72	1.04415	0.705413	No
ENSG00000003400	843	CASP10	caspase 10	55.1171	24.2192	39.6681	2.27576	0.00903893	Yes	71.9157	53.4041	62.6599	1.34663	0.0605395	No
ENSG00000003402	8837	CFLAR	CASP8 and FADD like apoptosis regulator	242.816	211.132	226.974	1.15007	0.499385	No	699.364	822.506	760.935	-1.17608	0.194661	No
ENSG00000003436	7035	TFPI	tissue factor pathway inhibitor	43.9738	129.64	86.807	-2.94812	0.000507182	Yes	50.4401	224.316	137.378	-4.44717	8.57696e-06	Yes
ENSG00000003509	55471	NDUFAF7	NADH:ubiquinone oxidoreductase complex assembly factor 7	268.536	185.243	226.89	1.44964	0.0491064	No	476.476	480.174	478.325	-1.00776	0.943222	No
ENSG00000003756	10181	RBM5	RNA binding motif protein 5	1518.03	1807	1662.52	-1.19035	0.540987	No	4362.51	8509.02	6435.76	-1.95049	1.3011e-08	No
ENSG00000003987	9108	MTMR7	myotubularin related protein 7	685.929	484.92	585.425	1.41452	0.204826	No	914.225	621.404	767.814	1.47122	0.0652363	No
ENSG00000003989	6542	SLC7A2	solute carrier family 7 member 2	168.517	30.5877	99.5524	5.5093	0.0412705	Yes	329.17	80.373	204.771	4.09553	0.000257752	Yes
ENSG00000004059	381	ARF5	ADP ribosylation factor 5	3375.21	3317.08	3346.15	1.01752	0.938138	No	3443.45	2061.79	2752.62	1.67012	2.93675e-05	No
ENSG00000004139	23098	SARM1	sterile alpha and TIR motif containing 1	226.343	571.227	398.785	-2.52372	0.000549688	Yes	945.61	2171.38	1558.49	-2.29627	2.10698e-10	Yes
ENSG00000004142	26073	POLDIP2	DNA polymerase delta interacting protein 2	2343.54	2251.76	2297.65	1.04076	0.775015	No	3301.14	2422.66	2861.9	1.36261	0.000123342	No
ENSG00000004399	23129	PLXND1	plexin D1	2151.58	999.929	1575.75	2.15173	0.00920092	Yes	2088.76	1351.49	1720.12	1.54552	0.0631925	No
ENSG00000004455	204	AK2	adenylate kinase 2	472.445	560.746	516.595	-1.1869	0.473795	No	984.33	1387.4	1185.86	-1.40948	0.00102043	No
ENSG00000004468	952	CD38	CD38 molecule	51.671	2.24215	26.9566	23.0453	1.41461e-05	Yes	141.527	5.75272	73.6398	24.6017	4.46848e-11	Yes
ENSG00000004478	2288	FKBP4	FKBP prolyl isomerase 4	3695.72	3294.24	3494.98	1.12187	0.453527	No	4794.42	4085.7	4440.06	1.17346	0.100138	No
ENSG00000004487	23028	KDM1A	lysine demethylase 1A	1500.25	8944.16	5222.21	-5.96178	1.86306e-10	Yes	2154.22	9143.41	5648.81	-4.24442	4.21285e-17	Yes
ENSG00000004534	10180	RBM6	RNA binding motif protein 6	1001.42	1720.03	1360.72	-1.7176	0.0116275	No	3650.04	6918.44	5284.24	-1.89544	6.77845e-05	No
ENSG00000004660	84254	CAMKK1	calcium/calmodulin dependent protein kinase kinase 1	4710	518.089	2614.04	9.0911	4.24178e-10	Yes	6113.82	800.867	3457.34	7.634	2.46092e-15	Yes
ENSG00000004700	5965	RECQL	RecQ like helicase	186.766	529.733	358.249	-2.83634	0.000125277	Yes	337.517	804.151	570.834	-2.38255	6.1287e-08	Yes
ENSG00000004766	55610	VPS50	VPS50 subunit of EARP/GARPII complex	1263.89	1125.48	1194.69	1.12297	0.598722	No	1571.22	1126.63	1348.93	1.39462	0.0227124	No
ENSG00000004776	126393	HSPB6	heat shock protein family B (small) member 6	131.338	7.72705	69.5327	16.9972	1.51277e-06	Yes	514.899	34.7697	274.834	14.8089	2.57464e-11	Yes
ENSG00000004777	115703	ARHGAP33	Rho GTPase activating protein 33	2022.18	6079.75	4050.96	-3.00653	0.00153453	Yes	2230.05	8246.67	5238.36	-3.69798	1.90366e-10	Yes
ENSG00000004779	4706	NDUFAB1	NADH:ubiquinone oxidoreductase subunit AB1	1575.98	1335.04	1455.51	1.18047	0.474358	No	2050.23	1222.63	1636.43	1.6769	0.000204897	No
ENSG00000004799	5166	PDK4	pyruvate dehydrogenase kinase 4	383.487	87.0535	235.27	4.40518	0.000604859	Yes	657.499	135.906	396.702	4.8379	2.58432e-05	Yes
ENSG00000004809	85413	SLC22A16	solute carrier family 22 member 16	1.24138	0.793933	1.01766	1.56359	0.315491	No	1.24847	1.95098	1.59973	-1.56269	0.312725	No
ENSG00000004838	51364	ZMYND10	zinc finger MYND-type containing 10	61.1474	21.7019	41.4246	2.81761	0.00716152	Yes	101.52	95.563	98.5417	1.06234	0.851759	No
ENSG00000004848	170302	ARX	aristaless related homeobox	307.657	608.058	457.858	-1.97642	0.0269519	No	333.12	806.32	569.72	-2.42051	0.252839	No
ENSG00000004864	10165	SLC25A13	solute carrier family 25 member 13	237.345	267.264	252.305	-1.12606	0.707046	No	267.914	348.415	308.165	-1.30047	0.211809	No
ENSG00000004866	7982	ST7	suppression of tumorigenicity 7	464.963	1403.47	934.216	-3.01845	1.16477e-06	Yes	739.805	1495.94	1117.87	-2.02208	1.75925e-08	Yes
ENSG00000004897	996	CDC27	cell division cycle 27	1446.79	1738.08	1592.43	-1.20134	0.412956	No	1751.43	1978.91	1865.17	-1.12989	0.228261	No
ENSG00000004939	6521	SLC4A1	solute carrier family 4 member 1 (Diego blood group)	0.95806	59.1873	30.0727	-61.7782	2.18237e-08	Yes	1.21229	65.0001	33.1062	-53.6178	2.64958e-10	Yes
ENSG00000004948	799	CALCR	calcitonin receptor	7.94782	0.505595	4.22671	15.7197	1.40419e-07	Yes	4.96463	2.76404	3.86434	1.79615	0.450839	No
ENSG00000004961	3052	HCCS	holocytochrome c synthase	552.963	305.145	429.054	1.81213	0.00519641	No	667.958	339.217	503.587	1.96912	2.04248e-08	No
ENSG00000004975	1856	DVL2	dishevelled segment polarity protein 2	344.231	904.333	624.282	-2.62711	0.000265801	Yes	738.548	1686.3	1212.43	-2.28327	1.11807e-07	Yes
ENSG00000005001	64063	PRSS22	serine protease 22	0.821492	0.506361	0.663927	1.62235	0.100132	No	2.12772	0.713446	1.42058	2.98231	2.50562e-06	Yes
ENSG00000005007	5976	UPF1	UPF1 RNA helicase and ATPase	2146.13	2482.27	2314.2	-1.15663	0.454442	No	2204.06	2714.64	2459.35	-1.23166	0.0392949	No
ENSG00000005020	8935	SKAP2	src kinase associated phosphoprotein 2	862.54	47.6838	455.112	18.0887	1.20981e-09	Yes	978.786	84.9859	531.886	11.517	1.46237e-09	Yes
ENSG00000005022	292	SLC25A5	solute carrier family 25 member 5	4088	4325.03	4206.52	-1.05798	0.811643	No	4625.61	3123.56	3874.59	1.48088	0.000466706	No
ENSG00000005059	55013	MCUB	mitochondrial calcium uniporter dominant negative beta subunit	84.844	122.277	103.561	-1.4412	0.440716	No	102.761	253.985	178.373	-2.4716	0.00287589	Yes
ENSG00000005075	5439	POLR2J	RNA polymerase II subunit J	290.9	430.59	360.745	-1.4802	0.109242	No	474.766	489.005	481.886	-1.02999	0.887128	No
ENSG00000005100	56919	DHX33	DEAH-box helicase 33	610.186	675.548	642.867	-1.10712	0.545794	No	689.259	929.11	809.185	-1.34798	0.00156722	No
ENSG00000005102	4222	MEOX1	mesenchyme homeobox 1	0.743811	3.05553	1.89967	-4.10794	0.00754174	Yes	0.720565	1.61257	1.16657	-2.23792	0.0326962	Yes
ENSG00000005108	221981	THSD7A	thrombospondin type 1 domain containing 7A	337.95	1733.07	1035.51	-5.12818	0.00111104	Yes	397.13	2260.5	1328.81	-5.69209	6.30171e-07	Yes
ENSG00000005156	3980	LIG3	DNA ligase 3	500.872	907.582	704.227	-1.812	0.00188368	No	590.566	1190.4	890.483	-2.0157	6.47402e-08	Yes
ENSG00000005175	79657	RPAP3	RNA polymerase II associated protein 3	350.137	393.336	371.736	-1.12338	0.651649	No	465.264	506.398	485.831	-1.08841	0.473686	No
ENSG00000005187	6296	ACSM3	acyl-CoA synthetase medium chain family member 3	1.69162	2.56996	2.13079	-1.51923	0.365294	No	5.91537	4.25318	5.08428	1.39081	0.414771	No
ENSG00000005189	81691	REXO5	RNA exonuclease 5	71.9815	165.101	118.541	-2.29366	0.00153941	Yes	157.549	290.713	224.131	-1.84522	0.00147525	No
ENSG00000005194	57019	CIAPIN1	cytokine induced apoptosis inhibitor 1	1398.08	1768.53	1583.3	-1.26497	0.101788	No	1474.73	1626.72	1550.72	-1.10306	0.270704	No
ENSG00000005206	56928	SPPL2B	signal peptide peptidase like 2B	671.454	607.626	639.54	1.10504	0.750863	No	1013.66	2085.86	1549.76	-2.05775	0.000292723	Yes
ENSG00000005238	80256	FAM214B	family with sequence similarity 214 member B	732.877	863.366	798.121	-1.17805	0.514583	No	1135.93	1433.85	1284.89	-1.26226	0.0106638	No
ENSG00000005243	51226	COPZ2	coatomer protein complex subunit zeta 2	83.413	13.3175	48.3652	6.26342	0.0014093	Yes	107.749	25.4806	66.615	4.22868	3.34402e-05	Yes
ENSG00000005249	5577	PRKAR2B	protein kinase cAMP-dependent type II regulatory subunit beta	2611.48	5406.25	4008.86	-2.07019	0.00960728	Yes	3041.07	4649.29	3845.18	-1.52883	0.0211602	No
ENSG00000005302	10943	MSL3	MSL complex subunit 3	870.454	1013.16	941.809	-1.16395	0.407234	No	1087.43	1076.87	1082.15	1.0098	0.927856	No
ENSG00000005339	1387	CREBBP	CREB binding protein	2023.57	4627.65	3325.61	-2.28688	0.0178829	Yes	1835.97	5099.94	3467.95	-2.7778	1.61393e-08	Yes
ENSG00000005379	9256	TSPOAP1	TSPO associated protein 1	4175.65	749.755	2462.7	5.56936	0.000137259	Yes	6998.89	3260.71	5129.8	2.14643	7.11142e-07	Yes
ENSG00000005381	4353	MPO	myeloperoxidase	38.4975	11.7849	25.1412	3.26668	0.00330518	Yes	75.2583	18.3272	46.7927	4.10637	7.96122e-06	Yes
ENSG00000005421	5444	PON1	paraoxonase 1	4.14835	0.662554	2.40545	6.26115	0.000208726	Yes	16.129	1.93001	9.02948	8.35693	1.01125e-07	Yes
ENSG00000005436	6936	GCFC2	GC-rich sequence DNA-binding factor 2	160.367	256.341	208.354	-1.59846	0.046711	No	311.636	626.386	469.011	-2.00999	2.66314e-05	Yes
ENSG00000005448	84058	WDR54	WD repeat domain 54	546.207	865.924	706.066	-1.58534	0.0211665	No	610.55	882.709	746.629	-1.44576	0.0215297	No
ENSG00000005469	54677	CROT	carnitine O-octanoyltransferase	178.431	117.908	148.169	1.5133	0.0208396	No	280.491	212.563	246.527	1.31957	0.0257586	No
ENSG00000005471	5244	ABCB4	ATP binding cassette subfamily B member 4	15.6078	16.8517	16.2297	-1.07969	0.884812	No	12.2237	48.276	30.2499	-3.94936	0.000320026	Yes
ENSG00000005483	55904	KMT2E	lysine methyltransferase 2E	1918.96	4070.23	2994.59	-2.12106	0.0040611	Yes	1861.67	5026.68	3444.17	-2.70009	1.11809e-06	Yes
ENSG00000005486	57414	RHBDD2	rhomboid domain containing 2	7677.58	1824.35	4750.97	4.20838	3.44917e-09	Yes	7568.11	1914.47	4741.29	3.95312	4.90514e-12	Yes
ENSG00000005513	30812	SOX8	SRY-box 8	1740.39	414.424	1077.41	4.19954	0.00105904	Yes	1352.47	865.69	1109.08	1.5623	0.087583	No
ENSG00000005700	25998	IBTK	inhibitor of Bruton tyrosine kinase	841.102	1338.66	1089.88	-1.59156	0.0204285	No	1374.77	1795.41	1585.09	-1.30597	0.016813	No
ENSG00000005801	7748	ZNF195	zinc finger protein 195	296.943	1299.44	798.189	-4.37604	1.02573e-06	Yes	690.32	2050.24	1370.28	-2.96998	5.29757e-11	Yes
ENSG00000005810	23077	MYCBP2	MYC binding protein 2	7036.15	2904.3	4970.23	2.42267	0.0153151	Yes	7577.6	4014.91	5796.26	1.88737	0.00426132	No
ENSG00000005812	26224	FBXL3	F-box and leucine rich repeat protein 3	1250.93	1099.92	1175.42	1.13729	0.584955	No	1242.29	1036.38	1139.34	1.19869	0.204176	No
ENSG00000005844	3683	ITGAL	integrin subunit alpha L	20.322	4.74945	12.5357	4.27881	0.00590836	Yes	18.5917	7.61373	13.1027	2.44187	0.00257829	Yes
ENSG00000005882	5164	PDK2	pyruvate dehydrogenase kinase 2	1769.46	630.601	1200.03	2.80599	9.32433e-07	Yes	3090.02	905.757	1997.89	3.41153	2.2207e-12	Yes
ENSG00000005884	3675	ITGA3	integrin subunit alpha 3	790.559	432.971	611.765	1.82589	0.0833658	No	1052.89	690.327	871.607	1.5252	0.0159947	No
ENSG00000005889	7543	ZFX	zinc finger protein X-linked	479.366	722.827	601.096	-1.50788	0.0472162	No	339.36	921.097	630.229	-2.71422	2.22329e-07	Yes
ENSG00000005893	3920	LAMP2	lysosomal associated membrane protein 2	4090.05	663.026	2376.54	6.16876	7.27548e-08	Yes	2777.87	871.011	1824.44	3.18925	3.99498e-06	Yes
ENSG00000005955	---	---	---	1551.67	1660.3	1605.99	-1.07001	0.697907	No	2485.7	2068.21	2276.96	1.20186	0.00505055	No
ENSG00000005961	3674	ITGA2B	integrin subunit alpha 2b	32.8567	34.0203	33.4385	-1.03541	0.946988	No	140.322	150.417	145.37	-1.07194	0.716409	No
ENSG00000005981	51666	ASB4	ankyrin repeat and SOCS box containing 4	19.3601	1.24112	10.3006	15.5989	3.16018e-06	Yes	30.8691	2.18562	16.5274	14.1237	1.84342e-08	Yes
ENSG00000006007	51573	GDE1	glycerophosphodiester phosphodiesterase 1	2468.1	1182.79	1825.45	2.08667	9.261e-05	Yes	3236.84	1303.23	2270.04	2.4837	5.57086e-14	Yes
ENSG00000006015	55049	REX1BD	required for excision 1-B domain containing	986.207	792.788	889.497	1.24397	0.388797	No	871.189	785.454	828.322	1.10915	0.623504	No
ENSG00000006016	9244	CRLF1	cytokine receptor like factor 1	574.845	16.0929	295.469	35.7205	4.35963e-09	Yes	709.03	22.1137	365.572	32.063	6.65038e-09	Yes
ENSG00000006025	114881	OSBPL7	oxysterol binding protein like 7	383.466	223.7	303.583	1.71419	0.185022	No	788.117	665.069	726.593	1.18501	0.168306	No
ENSG00000006042	26022	TMEM98	transmembrane protein 98	678.993	1231.45	955.219	-1.81364	0.0794161	No	376.766	1338.24	857.505	-3.55193	0.00013059	Yes
ENSG00000006047	51087	YBX2	Y-box binding protein 2	79.4898	14.1196	46.8047	5.62977	0.000244424	Yes	175.172	54.3034	114.738	3.2258	0.00104224	Yes
ENSG00000006062	9020	MAP3K14	mitogen-activated protein kinase kinase kinase 14	214.34	165.687	190.014	1.29364	0.495299	No	307.395	364.653	336.024	-1.18627	0.137902	No
ENSG00000006071	6833	ABCC8	ATP binding cassette subfamily C member 8	1151.28	80.0682	615.676	14.3788	1.5246e-05	Yes	2292.14	432.293	1362.22	5.30227	3.30272e-08	Yes
ENSG00000006075	---	---	---	1.85079	3.66206	2.75642	-1.97864	0.194363	No	18.228	17.135	17.6815	1.06379	0.912485	No
ENSG00000006114	---	---	---	1045.13	1871.78	1458.46	-1.79094	0.00597954	No	992.966	1819.61	1406.29	-1.8325	1.36333e-05	No
ENSG00000006116	10368	CACNG3	calcium voltage-gated channel auxiliary subunit gamma 3	3598.59	449.604	2024.1	8.00391	0.00176918	Yes	4321.18	304.778	2312.98	14.1781	2.82475e-10	Yes
ENSG00000006118	54972	TMEM132A	transmembrane protein 132A	4176.98	7596.4	5886.69	-1.81864	0.0113834	No	3857.63	8126.99	5992.31	-2.10673	7.03106e-06	Yes
ENSG00000006125	163	AP2B1	adaptor related protein complex 2 subunit beta 1	14038	17977.8	16007.9	-1.28065	0.17893	No	15166.9	13601.3	14384.1	1.11511	0.420751	No
ENSG00000006128	6863	TAC1	tachykinin precursor 1	398.601	41.4471	220.024	9.6171	5.6701e-05	Yes	729.237	203.49	466.363	3.58366	0.0780063	No
ENSG00000006194	10127	ZNF263	zinc finger protein 263	659.453	900.743	780.098	-1.36589	0.0197892	No	1097.25	1268.06	1182.65	-1.15567	0.0410811	No
ENSG00000006210	6376	CX3CL1	C-X3-C motif chemokine ligand 1	5892.25	135.236	3013.74	43.5702	2.17237e-10	Yes	5497.42	273.604	2885.51	20.0927	2.5224e-12	Yes
ENSG00000006282	64847	SPATA20	spermatogenesis associated 20	1313.68	367.272	840.474	3.57685	2.12279e-05	Yes	2107.62	665.731	1386.68	3.16588	1.43229e-09	Yes
ENSG00000006283	8913	CACNA1G	calcium voltage-gated channel subunit alpha1 G	1513.65	97.8456	805.747	15.4698	6.93198e-07	Yes	1520.56	702.889	1111.73	2.1633	0.0627503	No
ENSG00000006327	51330	TNFRSF12A	TNF receptor superfamily member 12A	6.74747	13.5493	10.1484	-2.00806	0.278232	No	18.3276	23.8876	21.1076	-1.30337	0.548111	No
ENSG00000006377	1750	DLX6	distal-less homeobox 6	38.6364	29.2074	33.9219	1.32283	0.468624	No	90.663	59.1174	74.8902	1.53361	0.595534	No
ENSG00000006432	4293	MAP3K9	mitogen-activated protein kinase kinase kinase 9	2641.44	1224.78	1933.11	2.15667	0.0243069	Yes	2073.44	1600.18	1836.81	1.29575	0.144172	No
ENSG00000006451	5898	RALA	RAS like proto-oncogene A	1346.94	3211.37	2279.16	-2.38419	0.000308309	Yes	1546.47	2664.48	2105.48	-1.72294	4.64568e-07	No
ENSG00000006453	55971	BAIAP2L1	BAI1 associated protein 2 like 1	12.346	8.81974	10.5829	1.39981	0.424883	No	30.9966	26.4243	28.7104	1.17303	0.599142	No
ENSG00000006459	80853	KDM7A	lysine demethylase 7A	385.443	654.045	519.744	-1.69687	0.0238324	No	492.6	801.108	646.854	-1.62628	0.00264719	No
ENSG00000006468	2115	ETV1	ETS variant 1	1219.17	1648.73	1433.95	-1.35235	0.266271	No	1188.86	1283.82	1236.34	-1.07987	0.766222	No
ENSG00000006530	55750	AGK	acylglycerol kinase	975.917	683.873	829.895	1.42705	0.0126055	No	1557.94	952.183	1255.06	1.63617	6.82558e-07	No
ENSG00000006534	221	ALDH3B1	aldehyde dehydrogenase 3 family member B1	39.5287	7.17984	23.3543	5.50551	0.000199204	Yes	40.9466	7.2301	24.0884	5.66335	2.03818e-05	Yes
ENSG00000006555	55001	TTC22	tetratricopeptide repeat domain 22	15.0924	1.15856	8.1255	13.0269	9.35802e-07	Yes	30.2397	5.71143	17.9755	5.29459	1.84621e-06	Yes
ENSG00000006576	57157	PHTF2	putative homeodomain transcription factor 2	348.217	905.969	627.093	-2.60174	8.04269e-05	Yes	620.928	1289.61	955.27	-2.07691	2.18886e-05	Yes
ENSG00000006606	10344	CCL26	C-C motif chemokine ligand 26	2.89269	0.505773	1.69923	5.71935	0.000910579	Yes	1.8826	0.755796	1.3192	2.49088	0.0135885	Yes
ENSG00000006607	9855	FARP2	FERM, ARH/RhoGEF and pleckstrin domain protein 2	490.007	574.34	532.173	-1.1721	0.416762	No	896.161	921.915	909.038	-1.02874	0.751074	No
ENSG00000006611	10083	USH1C	USH1 protein network component harmonin	134.528	4.64813	69.5882	28.9425	0.000230385	Yes	96.2914	29.7432	63.0173	3.23742	0.0357151	Yes
ENSG00000006625	79017	GGCT	gamma-glutamylcyclotransferase	673.663	387.532	530.597	1.73834	0.0482966	No	1589.15	694.794	1141.97	2.28723	8.55326e-07	Yes
ENSG00000006634	10926	DBF4	DBF4 zinc finger	53.598	186.455	120.026	-3.47876	0.00169909	Yes	140.014	592.428	366.221	-4.23119	5.26585e-06	Yes
ENSG00000006638	6915	TBXA2R	thromboxane A2 receptor	21.2807	21.2047	21.2427	1.00359	0.992383	No	15.0229	20.1663	17.5946	-1.34236	0.333971	No
ENSG00000006652	3475	IFRD1	interferon related developmental regulator 1	653.3	1342.52	997.911	-2.05498	0.000273398	Yes	1138.28	1600	1369.14	-1.40563	0.000882964	No
ENSG00000006659	56891	LGALS14	galectin 14	0.6836	0.46177	0.572685	1.48039	0.137023	No	1.43762	1.17096	1.30429	1.22772	0.618575	No
ENSG00000006695	1352	COX10	cytochrome c oxidase assembly factor heme A:farnesyltransferase COX10	267.123	373.149	320.136	-1.39692	0.050084	No	303.415	375.247	339.331	-1.23675	0.0306688	No
ENSG00000006704	9569	GTF2IRD1	GTF2I repeat domain containing 1	257.021	1052.59	654.805	-4.09533	1.40027e-07	Yes	407.721	1603.3	1005.51	-3.93235	7.4127e-13	Yes
ENSG00000006712	54623	PAF1	PAF1 homolog, Paf1/RNA polymerase II complex component	1326.93	1948.36	1637.65	-1.46832	0.00887361	No	2080.04	2177.54	2128.79	-1.04687	0.671387	No
ENSG00000006715	27072	VPS41	VPS41 subunit of HOPS complex	2961.8	2008.72	2485.26	1.47447	0.0072796	No	3135.89	2274.99	2705.44	1.37842	0.00530633	No
ENSG00000006740	9912	ARHGAP44	Rho GTPase activating protein 44	3065.96	854.84	1960.4	3.58659	8.30241e-05	Yes	2884.53	736.45	1810.49	3.9168	7.30586e-09	Yes
ENSG00000006744	60528	ELAC2	elaC ribonuclease Z 2	1343.08	1436.98	1390.03	-1.06991	0.586658	No	1605.13	1513.72	1559.42	1.06039	0.517153	No
ENSG00000006747	85477	SCIN	scinderin	14.2899	6.28271	10.2863	2.27449	0.13909	No	18.9987	12.5858	15.7922	1.50953	0.250472	No
ENSG00000006756	414	ARSD	arylsulfatase D	102.236	233.587	167.911	-2.28477	0.000960779	Yes	191.338	404.007	297.672	-2.11149	7.81823e-05	Yes
ENSG00000006757	8228	PNPLA4	patatin like phospholipase domain containing 4	323.792	189.373	256.582	1.70981	0.0346061	No	472.806	229.654	351.23	2.05878	2.34488e-06	Yes
ENSG00000006788	8735	MYH13	myosin heavy chain 13	5.58556	0.652751	3.11915	8.55695	5.66577e-06	Yes	7.18312	0.673376	3.92825	10.6673	2.06349e-10	Yes
ENSG00000006831	79602	ADIPOR2	adiponectin receptor 2	2008.72	1350.5	1679.61	1.48739	0.0166073	No	2220.5	1986.46	2103.48	1.11782	0.320062	No
ENSG00000006837	51265	CDKL3	cyclin dependent kinase like 3	14.1637	18.9359	16.5498	-1.33693	0.384833	No	39.1869	39.3992	39.293	-1.00542	0.978991	No
ENSG00000007001	151531	UPP2	uridine phosphorylase 2	78.5631	18.4718	48.5174	4.25315	0.000244523	Yes	100.616	33.9758	67.2961	2.96141	5.94736e-05	Yes
ENSG00000007047	57787	MARK4	microtubule affinity regulating kinase 4	1972.12	2314.35	2143.24	-1.17354	0.477422	No	2233.34	2142.23	2187.78	1.04253	0.734616	No
ENSG00000007062	8842	PROM1	prominin 1	151.095	437.134	294.114	-2.89311	0.0209631	Yes	156.422	825.399	490.911	-5.27675	4.43108e-10	Yes
ENSG00000007080	115098	CCDC124	coiled-coil domain containing 124	1431.1	1452.93	1442.02	-1.01525	0.949922	No	1798.18	1285.82	1542	1.39846	0.112471	No
ENSG00000007129	90273	CEACAM21	carcinoembryonic antigen related cell adhesion molecule 21	8.5417	4.21594	6.37882	2.02605	0.271171	No	11.3898	9.46635	10.4281	1.20319	0.695737	No
ENSG00000007168	5048	PAFAH1B1	platelet activating factor acetylhydrolase 1b regulatory subunit 1	11171.8	9122.44	10147.1	1.22465	0.320569	No	13398.9	10706.6	12052.7	1.25146	0.0428179	No
ENSG00000007171	4843	NOS2	nitric oxide synthase 2	277.217	36.6386	156.928	7.56626	3.09447e-08	Yes	280.8	47.7557	164.278	5.87991	8.83433e-12	Yes
ENSG00000007174	1770	DNAH9	dynein axonemal heavy chain 9	208.122	27.3181	117.72	7.61846	6.7751e-08	Yes	259.889	70.0369	164.963	3.71075	1.60198e-05	Yes
ENSG00000007202	9703	KIAA0100	KIAA0100	3478.46	3217.08	3347.77	1.08125	0.629865	No	4491.1	5016.33	4753.71	-1.11695	0.324153	No
ENSG00000007237	8522	GAS7	growth arrest specific 7	19317.9	5996.27	12657.1	3.22166	0.00208508	Yes	15394.5	3538.61	9466.57	4.35044	2.31303e-05	Yes
ENSG00000007255	79090	TRAPPC6A	trafficking protein particle complex 6A	200.067	129.799	164.933	1.54137	0.109061	No	262.125	150.151	206.138	1.74574	0.0200133	No
ENSG00000007264	4145	MATK	megakaryocyte-associated tyrosine kinase	1728.28	165.199	946.742	10.4618	6.75768e-06	Yes	1510.11	148.245	829.176	10.1865	4.82837e-07	Yes
ENSG00000007312	974	CD79B	CD79b molecule	7.17943	4.01547	5.59745	1.78794	0.199007	No	6.51107	1.89345	4.20226	3.43873	0.00123485	Yes
ENSG00000007314	6329	SCN4A	sodium voltage-gated channel alpha subunit 4	6.40676	9.69846	8.05261	-1.51379	0.435237	No	7.90398	12.6489	10.2765	-1.60033	0.258301	No
ENSG00000007341	54879	ST7L	suppression of tumorigenicity 7 like	108.328	155.73	132.029	-1.43758	0.0377552	No	263.913	428.295	346.104	-1.62286	3.47177e-06	No
ENSG00000007350	8277	TKTL1	transketolase like 1	2.55739	216.641	109.599	-84.7116	1.01542e-05	Yes	5.67328	328.726	167.2	-57.9429	0.000536544	Yes
ENSG00000007372	5080	PAX6	paired box 6	317.447	630.273	473.86	-1.98544	0.262482	No	441.998	2858.87	1650.43	-6.46805	0.000272137	Yes
ENSG00000007376	113000	RPUSD1	RNA pseudouridine synthase domain containing 1	591.165	500.625	545.895	1.18086	0.465536	No	459.919	476.285	468.102	-1.03558	0.882237	No
ENSG00000007384	64285	RHBDF1	rhomboid 5 homolog 1	136.829	31.3357	84.0826	4.36657	0.000248759	Yes	243.737	124.034	183.885	1.96509	0.00307567	No
ENSG00000007392	55692	LUC7L	LUC7 like	960.007	1713.32	1336.66	-1.78469	0.00337504	No	2500.2	5442.96	3971.58	-2.17701	5.58933e-06	Yes
ENSG00000007402	9254	CACNA2D2	calcium voltage-gated channel auxiliary subunit alpha2delta 2	529.105	330.556	429.83	1.60065	0.238669	No	733.768	822.674	778.221	-1.12116	0.72013	No
ENSG00000007516	8938	BAIAP3	BAI1 associated protein 3	3986.2	146.743	2066.47	27.1646	6.12442e-10	Yes	4970.14	621.731	2795.94	7.99404	1.58185e-06	Yes
ENSG00000007520	115939	TSR3	TSR3 ribosome maturation factor	866.584	929.205	897.894	-1.07226	0.773884	No	945.368	902.551	923.959	1.04744	0.818295	No
ENSG00000007541	9091	PIGQ	phosphatidylinositol glycan anchor biosynthesis class Q	1256.07	951.768	1103.92	1.31972	0.26538	No	1567.07	1755.46	1661.27	-1.12022	0.536521	No
ENSG00000007545	57585	CRAMP1	cramped chromatin regulator homolog 1	286.162	459.445	372.803	-1.60554	0.0341345	No	379.222	909.118	644.17	-2.39732	2.83639e-12	Yes
ENSG00000007866	7005	TEAD3	TEA domain transcription factor 3	34.9361	24.4516	29.6939	1.42878	0.557568	No	71.4402	190.927	131.184	-2.67254	0.0215971	Yes
ENSG00000007908	6401	SELE	selectin E	4.93905	4.25586	4.59746	1.16053	0.867169	No	6.90966	11.2978	9.10375	-1.63508	0.470341	No
ENSG00000007923	55735	DNAJC11	DnaJ heat shock protein family (Hsp40) member C11	1007.25	791.251	899.25	1.27298	0.107377	No	1872.33	1680.18	1776.26	1.11436	0.134852	No
ENSG00000007933	2328	FMO3	flavin containing monooxygenase 3	17.1039	0.784634	8.94426	21.7986	3.18831e-07	Yes	24.322	1.22304	12.7725	19.8865	5.32225e-11	Yes
ENSG00000007944	29116	MYLIP	myosin regulatory light chain interacting protein	457.954	181.419	319.686	2.52429	0.0271174	Yes	497.036	230.841	363.938	2.15315	0.0198114	Yes
ENSG00000007968	1870	E2F2	E2F transcription factor 2	1.2021	85.4252	43.3136	-71.063	1.18824e-05	Yes	1.69861	404.571	203.135	-238.178	1.29135e-07	Yes
ENSG00000008018	5689	PSMB1	proteasome subunit beta 1	1619.07	2153.68	1886.38	-1.3302	0.201708	No	2183.74	1987.27	2085.5	1.09887	0.371119	No
ENSG00000008056	6853	SYN1	synapsin I	18773.2	1634.32	10203.8	11.4869	8.84061e-08	Yes	16825.5	1458.72	9142.12	11.5344	9.1092e-14	Yes
ENSG00000008083	3720	JARID2	jumonji and AT-rich interaction domain containing 2	424.137	1003.36	713.746	-2.36564	3.44324e-05	Yes	722.796	1627.32	1175.06	-2.25142	5.06999e-10	Yes
ENSG00000008086	6792	CDKL5	cyclin dependent kinase like 5	572.261	445.626	508.944	1.28417	0.651512	No	211.15	154.714	182.932	1.36478	0.652009	No
ENSG00000008118	57172	CAMK1G	calcium/calmodulin dependent protein kinase IG	2404.77	166.163	1285.47	14.4724	1.00953e-08	Yes	3257.47	128.473	1692.97	25.3552	1.17416e-15	Yes
ENSG00000008128	728642	CDK11A	cyclin dependent kinase 11A	20.4728	24.1193	22.296	-1.17812	0.671108	No	18.8253	78.1618	48.4935	-4.15197	0.000718993	Yes
ENSG00000008130	65220	NADK	NAD kinase	699.246	963.91	831.578	-1.3785	0.029056	No	767.997	1096.42	932.21	-1.42764	0.000210909	No
ENSG00000008196	7021	TFAP2B	transcription factor AP-2 beta	0.683181	1.98686	1.33502	-2.90825	0.159904	No	1.57965	27.4363	14.508	-17.3686	0.0162185	Yes
ENSG00000008197	83741	TFAP2D	transcription factor AP-2 delta	3.33944	3.778	3.55872	-1.13133	0.886741	No	4.23398	6.40439	5.31919	-1.51262	0.589736	No
ENSG00000008226	9940	DLEC1	DLEC1 cilia and flagella associated protein	24.2857	4.47879	14.3822	5.42238	0.000585824	Yes	47.0776	33.2463	40.1619	1.41603	0.386182	No
ENSG00000008256	9265	CYTH3	cytohesin 3	1540.03	1424.62	1482.33	1.08101	0.646281	No	1785.34	1452.26	1618.8	1.22936	0.0790669	No
ENSG00000008277	53616	ADAM22	ADAM metallopeptidase domain 22	3694.72	1063.48	2379.1	3.47418	2.6497e-05	Yes	4237.77	1259.84	2748.81	3.36372	2.53924e-06	Yes
ENSG00000008282	6856	SYPL1	synaptophysin like 1	744.03	430.388	587.209	1.72874	0.0225258	No	716.307	645.598	680.953	1.10952	0.601819	No
ENSG00000008283	1534	CYB561	cytochrome b561	1432.87	310.667	871.768	4.61225	8.83812e-07	Yes	1753.01	443.161	1098.08	3.95568	5.32847e-08	Yes
ENSG00000008294	9043	SPAG9	sperm associated antigen 9	4926.4	5131.45	5028.93	-1.04162	0.788694	No	4406.67	6929.42	5668.04	-1.57248	0.00215003	No
ENSG00000008300	1951	CELSR3	cadherin EGF LAG seven-pass G-type receptor 3	1262.97	4462.5	2862.73	-3.53335	0.00093412	Yes	1690.26	6496.2	4093.23	-3.84332	1.85562e-12	Yes
ENSG00000008311	10157	AASS	aminoadipate-semialdehyde synthase	85.3561	94.1512	89.7536	-1.10304	0.851468	No	200.098	495.891	347.994	-2.47824	0.0146433	Yes
ENSG00000008323	55200	PLEKHG6	pleckstrin homology and RhoGEF domain containing G6	0.683448	0.633618	0.658533	1.07864	0.858419	No	1.03465	1.72546	1.38005	-1.66768	0.105073	No
ENSG00000008324	51188	SS18L2	SS18 like 2	298.924	395.716	347.32	-1.3238	0.235056	No	536.8	527.842	532.321	1.01697	0.906405	No
ENSG00000008382	84954	MPND	MPN domain containing	460.034	568.967	514.501	-1.2368	0.306126	No	808.37	692.713	750.541	1.16696	0.252242	No
ENSG00000008394	4257	MGST1	microsomal glutathione S-transferase 1	432.839	28.4673	230.653	15.2048	2.26866e-08	Yes	732.807	77.4417	405.124	9.4627	1.51245e-07	Yes
ENSG00000008405	1407	CRY1	cryptochrome circadian regulator 1	324.912	1107.02	715.966	-3.40715	1.60977e-06	Yes	400.08	1136.32	768.202	-2.84024	1.05044e-11	Yes
ENSG00000008441	4784	NFIX	nuclear factor I X	6845.21	17811.5	12328.3	-2.60204	0.00479915	Yes	5237.82	8510.26	6874.04	-1.62477	0.285556	No
ENSG00000008513	6482	ST3GAL1	ST3 beta-galactoside alpha-2,3-sialyltransferase 1	684.616	1670.88	1177.75	-2.44061	0.00233186	Yes	859.252	1979.68	1419.47	-2.30396	0.00277241	Yes
ENSG00000008516	64386	MMP25	matrix metallopeptidase 25	10.2468	56.3527	33.2997	-5.49953	2.20173e-05	Yes	12.31	97.4197	54.8649	-7.91385	3.28962e-08	Yes
ENSG00000008517	9235	IL32	interleukin 32	61.7442	32.0239	46.8841	1.92807	0.0881519	No	65.2622	32.8013	49.0317	1.98962	0.0164047	No
ENSG00000008710	5310	PKD1	polycystin 1, transient receptor potential channel interacting	4750.55	1333.17	3041.86	3.56335	0.0401418	Yes	6947.16	7544.42	7245.79	-1.08597	0.642844	No
ENSG00000008735	23542	MAPK8IP2	mitogen-activated protein kinase 8 interacting protein 2	10035	5714.88	7874.95	1.75595	0.0273494	No	7741.15	4021.78	5881.47	1.92481	3.86138e-05	No
ENSG00000008838	9862	MED24	mediator complex subunit 24	2169.34	2830.57	2499.96	-1.3048	0.136688	No	2304.37	3741.98	3023.17	-1.62387	8.52867e-08	No
ENSG00000008853	23221	RHOBTB2	Rho related BTB domain containing 2	3890.42	1596.1	2743.26	2.43745	0.000105987	Yes	6014.85	2700.49	4357.67	2.22731	4.62407e-08	Yes
ENSG00000008869	54497	HEATR5B	HEAT repeat containing 5B	1464.3	2177.98	1821.14	-1.48739	0.122189	No	1410.71	1954.76	1682.73	-1.38566	0.0539001	No
ENSG00000008952	7095	SEC62	SEC62 homolog, preprotein translocation factor	3859.42	3346.54	3602.98	1.15326	0.634482	No	6496.57	3256.2	4876.38	1.99514	2.45353e-07	No
ENSG00000008988	6224	RPS20	ribosomal protein S20	2924.22	11819	7371.6	-4.04176	0.000107948	Yes	6363.21	12313.3	9338.23	-1.93507	8.2266e-06	No
ENSG00000009307	7812	CSDE1	cold shock domain containing E1	9301.18	19953.3	14627.3	-2.14525	0.000257375	Yes	11599.4	15670.5	13635	-1.35098	0.00363495	No
ENSG00000009335	9690	UBE3C	ubiquitin protein ligase E3C	2101.26	1562.93	1832.1	1.34444	0.124724	No	2061.66	1681.68	1871.67	1.22595	0.10831	No
ENSG00000009413	5980	REV3L	REV3 like, DNA directed polymerase zeta catalytic subunit	426.506	1273.83	850.17	-2.98667	0.000828884	Yes	939.082	2367.39	1653.23	-2.52096	3.0018e-05	Yes
ENSG00000009694	10178	TENM1	teneurin transmembrane protein 1	419.665	357.707	388.686	1.17321	0.770707	No	546.928	526.529	536.729	1.03874	0.919854	No
ENSG00000009709	5081	PAX7	paired box 7	168.018	1.16094	84.5895	144.726	3.34806e-10	Yes	145.757	10.3581	78.0576	14.0718	0.0167439	Yes
ENSG00000009724	10747	MASP2	mannan binding lectin serine peptidase 2	72.4648	68.019	70.2419	1.06536	0.883161	No	1.71731	3.53584	2.62658	-2.05894	0.0362636	Yes
ENSG00000009780	199870	FAM76A	family with sequence similarity 76 member A	220.866	224.639	222.753	-1.01708	0.936441	No	382.148	396.34	389.244	-1.03714	0.71138	No
ENSG00000009790	80342	TRAF3IP3	TRAF3 interacting protein 3	35.319	17.3885	26.3538	2.03116	0.0232227	Yes	30.5536	4.44801	17.5008	6.86905	3.53282e-09	Yes
ENSG00000009830	29954	POMT2	protein O-mannosyltransferase 2	590.319	400.58	495.45	1.47366	0.18475	No	792.333	1050.72	921.525	-1.32611	0.0085776	No
ENSG00000009844	51534	VTA1	vesicle trafficking 1	1314.8	3347.64	2331.22	-2.54613	0.000148565	Yes	1391.14	2512	1951.57	-1.80571	0.000157643	No
ENSG00000009950	51085	MLXIPL	MLX interacting protein like	349.279	2.07583	175.678	168.26	2.64901e-08	Yes	924.378	8.57893	466.479	107.75	2.79591e-17	Yes
ENSG00000009954	9031	BAZ1B	bromodomain adjacent to zinc finger domain 1B	1886.17	4058.52	2972.34	-2.15173	0.000219783	Yes	2094.57	4555.8	3325.18	-2.17506	5.13911e-09	Yes
ENSG00000010017	10048	RANBP9	RAN binding protein 9	2155.49	1484.77	1820.13	1.45174	0.0114125	No	2963.74	2061.69	2512.71	1.43753	2.16986e-05	No
ENSG00000010030	51513	ETV7	ETS variant 7	13.0221	0.504964	6.76351	25.7881	5.84053e-09	Yes	14.4995	1.00325	7.75137	14.4525	1.76386e-10	Yes
ENSG00000010072	83932	SPRTN	SprT-like N-terminal domain	128.469	220.194	174.332	-1.71398	0.0178151	No	163.405	301.612	232.509	-1.8458	4.12655e-06	No
ENSG00000010165	51603	EEF1AKNMT	eEF1A lysine and N-terminal methyltransferase	811.733	888.806	850.27	-1.09495	0.534891	No	871.028	821.313	846.17	1.06053	0.519131	No
ENSG00000010219	8798	DYRK4	dual specificity tyrosine phosphorylation regulated kinase 4	247.893	91.5154	169.704	2.70875	0.000760171	Yes	451.851	214.048	332.95	2.11097	0.000143014	Yes
ENSG00000010244	7756	ZNF207	zinc finger protein 207	1942.05	3229.07	2585.56	-1.66271	0.00123078	No	2691.02	5514.77	4102.9	-2.04932	3.81263e-09	Yes
ENSG00000010256	7384	UQCRC1	ubiquinol-cytochrome c reductase core protein 1	5054.63	4205.9	4630.26	1.20179	0.314269	No	5471.46	3455.51	4463.49	1.5834	0.000643948	No
ENSG00000010270	83930	STARD3NL	STARD3 N-terminal like	941.033	1490.58	1215.8	-1.58398	0.0239294	No	1175.84	1766.06	1470.95	-1.50195	1.84881e-05	No
ENSG00000010278	928	CD9	CD9 molecule	1899.65	147.971	1023.81	12.838	1.81172e-10	Yes	1439.06	157.285	798.174	9.14943	4.25219e-11	Yes
ENSG00000010282	57467	HHATL	hedgehog acyltransferase like	940.976	1.06548	471.021	883.144	1.05439e-12	Yes	1298.28	4.83772	651.557	268.365	4.87157e-17	Yes
ENSG00000010292	9918	NCAPD2	non-SMC condensin I complex subunit D2	526.116	917.853	721.985	-1.74458	0.201126	No	437.014	2063.33	1250.17	-4.72143	5.9875e-06	Yes
ENSG00000010295	25900	IFFO1	intermediate filament family orphan 1	900.765	419.448	660.107	2.1475	0.000655783	Yes	1393.8	665.461	1029.63	2.09448	1.88993e-07	Yes
ENSG00000010310	2696	GIPR	gastric inhibitory polypeptide receptor	19.0493	3.6911	11.3702	5.16088	0.024122	Yes	44.1943	27.4708	35.8325	1.60877	0.290192	No
ENSG00000010318	51533	PHF7	PHD finger protein 7	103.068	64.2804	83.6741	1.60341	0.0765047	No	188.85	94.1485	141.499	2.00587	0.00344104	Yes
ENSG00000010319	56920	SEMA3G	semaphorin 3G	443.206	91.1577	267.182	4.86197	4.85916e-05	Yes	487.335	179.425	333.38	2.71608	1.10243e-06	Yes
ENSG00000010322	11188	NISCH	nischarin	7442.74	4101.22	5771.98	1.81477	0.0148394	No	6969.57	5610.42	6290	1.24225	0.00723526	No
ENSG00000010327	23166	STAB1	stabilin 1	276.279	214.175	245.227	1.28997	0.490289	No	394.867	458.066	426.466	-1.16005	0.399507	No
ENSG00000010361	80199	FUZ	fuzzy planar cell polarity protein	427.459	375.493	401.476	1.1384	0.648898	No	616.95	689.323	653.136	-1.11731	0.568141	No
ENSG00000010379	6540	SLC6A13	solute carrier family 6 member 13	155.182	12.4366	83.8092	12.4778	0.0134065	Yes	221.264	96.5666	158.915	2.29131	0.0851009	No
ENSG00000010404	3423	IDS	iduronate 2-sulfatase	26604.7	3966.57	15285.6	6.70723	2.74679e-07	Yes	35251.2	5652.08	20451.6	6.23685	5.83269e-11	Yes
ENSG00000010438	5646	PRSS3	serine protease 3	699.293	3.1392	351.216	222.761	2.33303e-12	Yes	734.668	5.98375	370.326	122.777	3.16887e-14	Yes
ENSG00000010539	7752	ZNF200	zinc finger protein 200	110.799	284.913	197.856	-2.57145	3.74864e-05	Yes	171.618	330.792	251.205	-1.92749	5.26434e-07	No
ENSG00000010610	920	CD4	CD4 molecule	194.22	50.4504	122.335	3.84971	0.000662653	Yes	293.031	68.0114	180.521	4.30855	1.1234e-05	Yes
ENSG00000010626	10233	LRRC23	leucine rich repeat containing 23	293.793	168.408	231.101	1.74453	0.0121831	No	494.382	214.805	354.594	2.30154	4.59807e-07	Yes
ENSG00000010671	695	BTK	Bruton tyrosine kinase	28.0931	11.2141	19.6536	2.50515	0.0138027	Yes	45.6808	20.6493	33.165	2.21223	0.00178411	Yes
ENSG00000010704	3077	HFE	homeostatic iron regulator	30.1453	5.15442	17.6499	5.84843	0.00704471	Yes	35.6282	17.1775	26.4029	2.07412	0.0439828	Yes
ENSG00000010803	22955	SCMH1	Scm polycomb group protein homolog 1	841.277	892.079	866.678	-1.06039	0.770534	No	1026.83	1339.9	1183.37	-1.30489	0.00925247	No
ENSG00000010810	2534	FYN	FYN proto-oncogene, Src family tyrosine kinase	3415.69	6276.24	4845.97	-1.83747	0.00011971	No	4396.73	6318.79	5357.76	-1.43716	3.87127e-05	No
ENSG00000010818	3097	HIVEP2	human immunodeficiency virus type I enhancer binding protein 2	5348.55	4666.12	5007.33	1.14625	0.839917	No	4598.01	2692.38	3645.19	1.70779	0.186808	No
ENSG00000010932	2326	FMO1	flavin containing monooxygenase 1	3.62695	23.7185	13.6727	-6.5395	0.00274221	Yes	2.43142	25.8862	14.1588	-10.6466	0.000175741	Yes
ENSG00000011007	6924	ELOA	elongin A	564.054	1472.49	1018.27	-2.61054	4.8536e-07	Yes	920.892	1995.38	1458.13	-2.16679	1.69703e-11	Yes
ENSG00000011009	11313	LYPLA2	lysophospholipase 2	575.194	1083.78	829.485	-1.88419	0.00021053	No	777.543	1362.36	1069.95	-1.75214	0.000236817	No
ENSG00000011021	1185	CLCN6	chloride voltage-gated channel 6	2914.54	1498.33	2206.44	1.94519	0.00475887	No	2749.82	2071.85	2410.83	1.32723	0.00248742	No
ENSG00000011028	9902	MRC2	mannose receptor C type 2	294.888	363.73	329.309	-1.23345	0.702518	No	285.216	1100.63	692.925	-3.85895	0.0019756	Yes
ENSG00000011083	6534	SLC6A7	solute carrier family 6 member 7	1582.46	225.059	903.761	7.03132	7.37798e-06	Yes	3173.69	208.859	1691.27	15.1953	5.8818e-10	Yes
ENSG00000011105	10867	TSPAN9	tetraspanin 9	530.274	655.88	593.077	-1.23687	0.272935	No	665.832	734.438	700.135	-1.10304	0.636463	No
ENSG00000011114	55727	BTBD7	BTB domain containing 7	303.086	1142.02	722.555	-3.76798	9.58619e-07	Yes	364.421	1180.94	772.682	-3.2406	3.58445e-10	Yes
ENSG00000011132	9546	APBA3	amyloid beta precursor protein binding family A member 3	134.816	208.337	171.577	-1.54535	0.0862766	No	223.887	470.643	347.265	-2.10214	2.53021e-05	Yes
ENSG00000011143	54903	MKS1	MKS transition zone complex subunit 1	158.249	253.415	205.832	-1.60137	0.0395477	No	251.854	596.147	424	-2.36703	3.26572e-07	Yes
ENSG00000011198	51099	ABHD5	abhydrolase domain containing 5	151.487	220.294	185.891	-1.45421	0.0714814	No	132.442	186.396	159.419	-1.40738	0.0381058	No
ENSG00000011201	3730	ANOS1	anosmin 1	350.534	72.9537	211.744	4.80488	0.00439816	Yes	427.39	194.451	310.921	2.19793	0.134689	No
ENSG00000011243	26993	AKAP8L	A-kinase anchoring protein 8 like	995.891	1605.89	1300.89	-1.61252	0.0362352	No	2784.55	4998.99	3891.77	-1.79526	4.40493e-05	No
ENSG00000011258	54799	MBTD1	mbt domain containing 1	220.174	1793.49	1006.83	-8.14578	1.28406e-09	Yes	446.335	2354.57	1400.45	-5.27533	1.67383e-14	Yes
ENSG00000011260	51096	UTP18	UTP18 small subunit processome component	577.156	888.82	732.988	-1.54	0.0416455	No	741.504	944.707	843.106	-1.27404	0.00291245	No
ENSG00000011275	54476	RNF216	ring finger protein 216	1046.18	1287.79	1166.99	-1.23095	0.168814	No	1113.28	1341.3	1227.29	-1.20482	0.0313682	No
ENSG00000011295	54902	TTC19	tetratricopeptide repeat domain 19	1811.2	1379.29	1595.25	1.31314	0.0612018	No	2487.51	1603.64	2045.58	1.55117	9.25653e-06	No
ENSG00000011304	5725	PTBP1	polypyrimidine tract binding protein 1	531.657	1579.53	1055.59	-2.97096	0.0029416	Yes	776.634	3193.87	1985.25	-4.11246	1.25421e-07	Yes
ENSG00000011332	8193	DPF1	double PHD fingers 1	1326.74	3499.38	2413.06	-2.63757	2.98655e-05	Yes	1858.53	3235.76	2547.14	-1.74103	0.000115828	No
ENSG00000011347	9066	SYT7	synaptotagmin 7	6274.72	2104.22	4189.47	2.98196	0.000225452	Yes	7861.91	2059.5	4960.71	3.81738	4.75547e-11	Yes
ENSG00000011376	23395	LARS2	leucyl-tRNA synthetase 2, mitochondrial	857.752	574.668	716.21	1.4926	0.00924098	No	1005.87	786.705	896.287	1.27859	0.0126311	No
ENSG00000011405	5286	PIK3C2A	phosphatidylinositol-4-phosphate 3-kinase catalytic subunit type 2 alpha	734.227	531.721	632.974	1.38085	0.263322	No	1106.32	1312.15	1209.23	-1.18605	0.314261	No
ENSG00000011422	5329	PLAUR	plasminogen activator, urokinase receptor	33.8312	41.2946	37.5629	-1.22061	0.689005	No	39.9249	193.338	116.632	-4.84254	3.42497e-05	Yes
ENSG00000011426	54443	ANLN	anillin actin binding protein	2552.25	213.124	1382.69	11.9754	2.43574e-05	Yes	1189.5	746.387	967.941	1.59367	0.183711	No
ENSG00000011451	58525	WIZ	WIZ zinc finger	1485.95	3748.69	2617.32	-2.52275	0.00061054	Yes	1463.67	4071.65	2767.66	-2.78181	1.55794e-08	Yes
ENSG00000011454	2844	GPR21	G protein-coupled receptor 21	2892.97	3040.71	2966.84	-1.05107	0.786086	No	3279.29	3520.79	3400.04	-1.07364	0.489338	No
ENSG00000011465	1634	DCN	decorin	1529.94	532.321	1031.13	2.8741	0.0636851	No	1499.53	819.501	1159.52	1.82981	0.118749	No
ENSG00000011478	54814	QPCTL	glutaminyl-peptide cyclotransferase like	237.898	101.583	169.74	2.34191	0.0195053	Yes	241.496	192.56	217.028	1.25414	0.148794	No
ENSG00000011485	5536	PPP5C	protein phosphatase 5 catalytic subunit	2272.47	2153.58	2213.03	1.05521	0.713661	No	3128.15	2765.67	2946.91	1.13106	0.122478	No
ENSG00000011523	23177	CEP68	centrosomal protein 68	1559.72	1856.05	1707.89	-1.18999	0.279793	No	1808.32	1811.53	1809.92	-1.00177	0.98944	No
ENSG00000011566	8491	MAP4K3	mitogen-activated protein kinase kinase kinase kinase 3	952.132	1344.36	1148.25	-1.41195	0.0975316	No	1223.42	1580.7	1402.06	-1.29203	0.0244575	No
ENSG00000011590	27033	ZBTB32	zinc finger and BTB domain containing 32	3.96153	2.70615	3.33384	1.4639	0.575922	No	1.80889	0.635712	1.2223	2.84545	0.00341937	Yes
ENSG00000011600	7305	TYROBP	TYRO protein tyrosine kinase binding protein	136.512	43.1634	89.8379	3.16269	0.00122359	Yes	178.564	30.9548	104.759	5.76854	1.69388e-07	Yes
ENSG00000011638	57146	TMEM159	transmembrane protein 159	120.54	1092.28	606.41	-9.06156	1.88094e-07	Yes	166.675	615.282	390.978	-3.6915	1.34531e-06	Yes
ENSG00000011677	2556	GABRA3	gamma-aminobutyric acid type A receptor alpha3 subunit	2069.15	2613.52	2341.34	-1.26309	0.483054	No	2031.21	1702.07	1866.64	1.19338	0.350918	No
ENSG00000012048	672	BRCA1	BRCA1 DNA repair associated	72.128	91.3662	81.7471	-1.26672	0.734723	No	95.2268	436.869	266.048	-4.58767	0.00415039	Yes
ENSG00000012061	2067	ERCC1	ERCC excision repair 1, endonuclease non-catalytic subunit	864.622	1086.77	975.695	-1.25693	0.200844	No	1816.95	2024.75	1920.85	-1.11436	0.286171	No
ENSG00000012124	933	CD22	CD22 molecule	371.353	0.697253	186.025	532.595	7.12293e-11	Yes	512.921	2.4288	257.675	211.183	1.27351e-15	Yes
ENSG00000012171	7869	SEMA3B	semaphorin 3B	1740.45	69.5712	905.009	25.0168	6.52733e-08	Yes	1276.9	301.47	789.184	4.23558	1.27445e-08	Yes
ENSG00000012174	51360	MBTPS2	membrane bound transcription factor peptidase, site 2	545.009	708.917	626.963	-1.30075	0.249247	No	506.53	654.302	580.416	-1.29174	0.0902435	No
ENSG00000012211	4007	PRICKLE3	prickle planar cell polarity protein 3	19.8978	6.80293	13.3504	2.92489	0.0372843	Yes	34.5948	18.5647	26.5798	1.86347	0.00316607	No
ENSG00000012223	4057	LTF	lactotransferrin	11.0267	2.5408	6.78375	4.33985	0.00671305	Yes	15.4947	2.16427	8.82949	7.15931	6.81082e-06	Yes
ENSG00000012232	2137	EXTL3	exostosin like glycosyltransferase 3	3813.13	6070.92	4942.03	-1.59211	0.0188282	No	3138.3	3926.82	3532.56	-1.25126	0.0446448	No
ENSG00000012504	9971	NR1H4	nuclear receptor subfamily 1 group H member 4	1.18175	3.48786	2.33481	-2.95144	0.024868	Yes	3.16072	1.35051	2.25561	2.34039	0.0608966	No
ENSG00000012660	60481	ELOVL5	ELOVL fatty acid elongase 5	1524.02	2172.56	1848.29	-1.42554	0.098871	No	1636.18	2336.27	1986.23	-1.42788	0.0178524	No
ENSG00000012779	240	ALOX5	arachidonate 5-lipoxygenase	54.2301	7.31183	30.771	7.41677	4.52626e-05	Yes	127.523	12.943	70.2329	9.85267	1.94228e-08	Yes
ENSG00000012817	8284	KDM5D	lysine demethylase 5D	9.12662	37.3403	23.2335	-4.09136	0.520776	No	1831.83	121.388	976.611	15.0907	0.00629367	Yes
ENSG00000012822	57658	CALCOCO1	calcium binding and coiled-coil domain 1	2686.98	2118.3	2402.64	1.26846	0.133138	No	4483.97	3969.73	4226.85	1.12954	0.186288	No
ENSG00000012963	55148	UBR7	ubiquitin protein ligase E3 component n-recognin 7 (putative)	1464.31	1656.28	1560.3	-1.1311	0.450821	No	1622.52	1719.65	1671.08	-1.05987	0.48018	No
ENSG00000012983	11183	MAP4K5	mitogen-activated protein kinase kinase kinase kinase 5	523.862	1117.59	820.726	-2.13337	0.00144261	Yes	1310.85	2090.08	1700.47	-1.59445	0.000874398	No
ENSG00000013016	30845	EHD3	EH domain containing 3	5003.83	409.722	2706.78	12.2127	8.22465e-12	Yes	5741.99	403.764	3072.88	14.2212	5.26681e-17	Yes
ENSG00000013275	5704	PSMC4	proteasome 26S subunit, ATPase 4	1678.37	2289.19	1983.78	-1.36394	0.0340457	No	2054.99	1980.54	2017.76	1.03759	0.690502	No
ENSG00000013288	23324	MAN2B2	mannosidase alpha class 2B member 2	1381.3	593.91	987.607	2.32578	0.00158635	Yes	1368.96	603.939	986.452	2.26673	3.56367e-07	Yes
ENSG00000013293	57709	SLC7A14	solute carrier family 7 member 14	1514.77	167.586	841.177	9.03877	2.3792e-06	Yes	1998.2	194.339	1096.27	10.282	1.979e-10	Yes
ENSG00000013297	5010	CLDN11	claudin 11	2593.9	115.671	1354.79	22.4248	0.000154979	Yes	1572.54	238.772	905.655	6.58593	7.67799e-05	Yes
ENSG00000013306	51629	SLC25A39	solute carrier family 25 member 39	1026.67	1243.45	1135.06	-1.21115	0.330756	No	1422.12	1893.63	1657.88	-1.33155	0.0452033	No
ENSG00000013364	9961	MVP	major vault protein	465.62	64.3926	265.006	7.23095	5.11571e-07	Yes	528.958	132.747	330.852	3.98472	6.61238e-10	Yes
ENSG00000013374	51667	NUB1	negative regulator of ubiquitin like proteins 1	823.652	888.859	856.256	-1.07917	0.660364	No	1378.18	1305.45	1341.82	1.05571	0.446936	No
ENSG00000013375	5238	PGM3	phosphoglucomutase 3	283.803	527.334	405.569	-1.8581	0.00101511	No	531.139	819.703	675.421	-1.54329	7.31496e-05	No
ENSG00000013392	112611	RWDD2A	RWD domain containing 2A	557.874	600.34	579.107	-1.07612	0.731851	No	824.825	518.072	671.449	1.5921	0.000139498	No
ENSG00000013441	1195	CLK1	CDC like kinase 1	790.238	1780.06	1285.15	-2.25256	0.0270243	Yes	3009.25	6422.84	4716.05	-2.13436	6.73497e-06	Yes
ENSG00000013503	55703	POLR3B	RNA polymerase III subunit B	351.306	486.118	418.712	-1.38374	0.109121	No	388.68	449.161	418.921	-1.15561	0.240257	No
ENSG00000013523	23357	ANGEL1	angel homolog 1	1003.48	310.421	656.952	3.23265	2.68385e-05	Yes	1094.07	788.82	941.446	1.38697	0.000308739	No
ENSG00000013561	9604	RNF14	ring finger protein 14	1625.19	1144.16	1384.68	1.42042	0.0949699	No	2057.86	1076.1	1566.98	1.91233	1.60056e-06	No
ENSG00000013563	1774	DNASE1L1	deoxyribonuclease 1 like 1	169.649	63.1366	116.393	2.68702	0.000521996	Yes	641.648	225.474	433.561	2.84577	4.92482e-10	Yes
ENSG00000013573	1663	DDX11	DEAD/H-box helicase 11	88.6209	157.591	123.106	-1.77826	0.199828	No	202.957	1055.61	629.285	-5.20116	7.78076e-07	Yes
ENSG00000013583	50865	HEBP1	heme binding protein 1	527.224	314.037	420.631	1.67886	0.0236983	No	724.022	296.798	510.41	2.43944	2.83582e-09	Yes
ENSG00000013588	9052	GPRC5A	G protein-coupled receptor class C group 5 member A	4.15763	4.42542	4.29153	-1.06441	0.936612	No	9.07588	9.66566	9.37077	-1.06498	0.90008	No
ENSG00000013619	10046	MAMLD1	mastermind like domain containing 1	663.491	824.224	743.857	-1.24225	0.472371	No	771.151	995.541	883.346	-1.29098	0.0520819	No
ENSG00000013725	923	CD6	CD6 molecule	44.6351	4.3433	24.4892	10.2768	6.94628e-06	Yes	51.3195	6.56349	28.9415	7.81893	0.000173332	Yes
ENSG00000013810	10460	TACC3	transforming acidic coiled-coil containing protein 3	54.9389	235.215	145.077	-4.28139	0.0242621	Yes	116.483	1039.4	577.941	-8.92319	0.000252701	Yes
ENSG00000014123	23376	UFL1	UFM1 specific ligase 1	485.585	372.896	429.241	1.3022	0.334732	No	674.046	612.596	643.321	1.10031	0.540388	No
ENSG00000014138	23649	POLA2	DNA polymerase alpha 2, accessory subunit	201.513	290.147	245.83	-1.43984	0.27084	No	237.482	565.61	401.546	-2.3817	0.00121375	Yes
ENSG00000014164	23144	ZC3H3	zinc finger CCCH-type containing 3	456.886	845.294	651.09	-1.85012	0.00806605	No	389.601	799.179	594.39	-2.05127	4.20223e-05	Yes
ENSG00000014216	823	CAPN1	calpain 1	2440.35	2950.11	2695.23	-1.20889	0.283569	No	2324.55	2283.66	2304.11	1.01791	0.900505	No
ENSG00000014257	55	ACPP	acid phosphatase, prostate	1.80794	0.688491	1.24822	2.62594	0.0657432	No	2.57285	1.17995	1.8764	2.18047	0.0777937	No
ENSG00000014641	4190	MDH1	malate dehydrogenase 1	14690.2	3282.04	8986.14	4.47595	7.29833e-08	Yes	21161.8	3760.15	12461	5.62792	1.8952e-17	Yes
ENSG00000014824	10463	SLC30A9	solute carrier family 30 member 9	3459.27	3491.08	3475.18	-1.0092	0.969633	No	4271.45	3177.06	3724.26	1.34446	0.00431872	No
ENSG00000014914	10903	MTMR11	myotubularin related protein 11	103.6	29.9007	66.7505	3.46482	0.0519803	No	285.834	226.311	256.073	1.26301	0.27402	No
ENSG00000014919	1355	COX15	cytochrome c oxidase assembly homolog COX15	403.489	519.181	461.335	-1.28673	0.108469	No	434.273	612.068	523.17	-1.40941	0.00317521	No
ENSG00000015133	440193	CCDC88C	coiled-coil domain containing 88C	171.152	840.687	505.92	-4.91192	1.58017e-05	Yes	204.77	1578.76	891.763	-7.70991	1.15103e-09	Yes
ENSG00000015153	10138	YAF2	YY1 associated factor 2	612.189	637.79	624.989	-1.04182	0.890875	No	715.174	722.752	718.963	-1.0106	0.942379	No
ENSG00000015171	10771	ZMYND11	zinc finger MYND-type containing 11	3126.35	4039.15	3582.75	-1.29197	0.153017	No	4020.31	4069.36	4044.83	-1.0122	0.934108	No
ENSG00000015285	7454	WAS	WASP actin nucleation promoting factor	42.341	24.4127	33.3769	1.73438	0.0269398	No	75.1358	44.3746	59.7552	1.69322	0.00133913	No
ENSG00000015413	1800	DPEP1	dipeptidase 1	0.948446	66.8561	33.9023	-70.4902	8.73329e-11	Yes	3.01003	90.4879	46.7489	-30.0621	1.57015e-09	Yes
ENSG00000015475	637	BID	BH3 interacting domain death agonist	1136.57	1515.91	1326.24	-1.33376	0.107449	No	740.954	908.511	824.732	-1.22614	0.182288	No
ENSG00000015479	9782	MATR3	matrin 3	12606.9	28152.4	20379.7	-2.23309	0.00164195	Yes	16554.9	22943.9	19749.4	-1.38593	0.000977287	No
ENSG00000015520	29881	NPC1L1	NPC1 like intracellular cholesterol transporter 1	2.15699	1.33075	1.74387	1.62088	0.395855	No	2.86492	3.18803	3.02647	-1.11278	0.754217	No
ENSG00000015532	64132	XYLT2	xylosyltransferase 2	393.972	216.143	305.058	1.82274	0.00458701	No	472.515	343.79	408.152	1.37443	0.0123828	No
ENSG00000015568	84220	RGPD5	RANBP2 like and GRIP domain containing 5	26.6347	31.6304	29.1325	-1.18756	0.726299	No	19.747	20.7349	20.2409	-1.05003	0.860376	No
ENSG00000015592	81551	STMN4	stathmin 4	4696.93	7919.76	6308.35	-1.68616	0.0294416	No	7970.99	6794.15	7382.57	1.17321	0.280803	No
ENSG00000015676	23386	NUDCD3	NudC domain containing 3	9583	5644.8	7613.9	1.69767	0.00368661	No	8265.27	3970.43	6117.85	2.08171	3.70553e-07	Yes
ENSG00000016082	3670	ISL1	ISL LIM homeobox 1	0.56927	1.27165	0.920459	-2.23382	0.134959	No	0.805817	42.3305	21.5682	-52.5312	0.00742926	Yes
ENSG00000016391	55349	CHDH	choline dehydrogenase	310.964	33.8143	172.389	9.19623	6.52113e-08	Yes	472.802	66.4319	269.617	7.1171	2.25006e-09	Yes
ENSG00000016402	53832	IL20RA	interleukin 20 receptor subunit alpha	30.3218	1.05815	15.69	28.6555	1.2924e-08	Yes	78.0479	1.92821	39.988	40.477	4.85219e-13	Yes
ENSG00000016602	22802	CLCA4	chloride channel accessory 4	84.7194	0.543733	42.6315	155.811	1.1693e-11	Yes	101.177	0.71391	50.9453	141.722	6.34141e-17	Yes
ENSG00000016864	55830	GLT8D1	glycosyltransferase 8 domain containing 1	693.57	863.242	778.406	-1.24464	0.103813	No	1238.62	1381.7	1310.16	-1.11552	0.119292	No
ENSG00000017260	27032	ATP2C1	ATPase secretory pathway Ca2+ transporting 1	3458.78	3664.44	3561.61	-1.05946	0.768088	No	4229.76	4300.47	4265.12	-1.01672	0.905601	No
ENSG00000017373	---	---	---	4600.43	2633.66	3617.05	1.74678	0.0715941	No	3568.5	2774.03	3171.27	1.28639	0.0885788	No
ENSG00000017427	3479	IGF1	insulin like growth factor 1	100.048	35.6016	67.8249	2.81022	0.0145663	Yes	193.335	47.3721	120.353	4.08119	2.6386e-05	Yes
ENSG00000017483	92745	SLC38A5	solute carrier family 38 member 5	604.664	782.83	693.747	-1.29465	0.156133	No	523.335	829.839	676.587	-1.58567	0.00691775	No
ENSG00000017621	---	---	---	123.414	42.3206	82.8672	2.91616	0.000822075	Yes	137.69	54.2662	95.9783	2.53732	6.69691e-07	Yes
ENSG00000017797	10928	RALBP1	ralA binding protein 1	1962.71	1169.94	1566.33	1.67761	0.000269198	No	2182.91	1159.11	1671.01	1.88326	2.41692e-08	No
ENSG00000018189	22902	RUFY3	RUN and FYVE domain containing 3	5899.42	9084.24	7491.83	-1.53985	0.0750796	No	6641.36	7838.76	7240.06	-1.18029	0.251001	No
ENSG00000018236	1272	CNTN1	contactin 1	9973.3	6616.81	8295.06	1.50727	0.290688	No	8435.68	3673.02	6054.35	2.29666	0.00537808	Yes
ENSG00000018280	6556	SLC11A1	solute carrier family 11 member 1	15.2644	4.6001	9.93224	3.31827	0.0041079	Yes	62.5143	10.1611	36.3377	6.15233	2.84737e-07	Yes
ENSG00000018408	25937	WWTR1	WW domain containing transcription regulator 1	231.326	245.855	238.591	-1.06281	0.837289	No	289.169	385.926	337.548	-1.3346	0.119417	No
ENSG00000018510	8540	AGPS	alkylglycerone phosphate synthase	864.348	1632.08	1248.21	-1.88822	0.00994981	No	853.989	1544.21	1199.1	-1.80823	6.68737e-06	No
ENSG00000018607	---	---	---	9.8531	13.3282	11.5906	-1.35269	0.394168	No	16.042	22.1781	19.1101	-1.3825	0.285409	No
ENSG00000018610	63932	CXorf56	chromosome X open reading frame 56	392.229	271.104	331.666	1.44678	0.0529984	No	533.979	411.512	472.746	1.2976	0.00122932	No
ENSG00000018625	477	ATP1A2	ATPase Na+/K+ transporting subunit alpha 2	11159.5	1047.91	6103.71	10.6493	0.000118285	Yes	18046.4	2407.45	10226.9	7.49606	2.86918e-06	Yes
ENSG00000018699	55622	TTC27	tetratricopeptide repeat domain 27	124.238	525.292	324.765	-4.22812	4.91479e-08	Yes	193.193	480.315	336.754	-2.48619	5.19955e-08	Yes
ENSG00000018869	147948	ZNF582	zinc finger protein 582	84.5808	92.8929	88.7369	-1.09827	0.666857	No	105.258	96.0246	100.641	1.09615	0.450643	No
ENSG00000019102	23584	VSIG2	V-set and immunoglobulin domain containing 2	62.4322	1.46612	31.9492	42.5833	1.28437e-07	Yes	26.3761	13.0233	19.6997	2.0253	0.01126	Yes
ENSG00000019144	23187	PHLDB1	pleckstrin homology like domain family B member 1	2608.39	2078.96	2343.67	1.25466	0.422794	No	3627.82	4789.2	4208.51	-1.32013	0.0691079	No
ENSG00000019169	8685	MARCO	macrophage receptor with collagenous structure	16.1763	1.5988	8.88755	10.1178	0.0044389	Yes	18.3639	3.9473	11.1556	4.65228	0.0143585	Yes
ENSG00000019186	1591	CYP24A1	cytochrome P450 family 24 subfamily A member 1	19.2175	2.03179	10.6246	9.45839	2.43878e-05	Yes	27.9707	3.19803	15.5844	8.74623	4.45192e-06	Yes
ENSG00000019485	56981	PRDM11	PR/SET domain 11	433.964	82.947	258.455	5.23182	3.26241e-06	Yes	412.418	90.1231	251.271	4.57616	8.03076e-12	Yes
ENSG00000019505	57586	SYT13	synaptotagmin 13	5213.81	5173.48	5193.64	1.0078	0.980413	No	6938.69	4699.17	5818.93	1.47658	0.101502	No
ENSG00000019549	6591	SNAI2	snail family transcriptional repressor 2	28.7711	166.03	97.4005	-5.77072	2.66767e-05	Yes	44.8708	140.655	92.7631	-3.13468	5.45517e-05	Yes
ENSG00000019582	972	CD74	CD74 molecule	2063.24	51.2624	1057.25	40.2487	1.74923e-11	Yes	2420.41	61.2502	1240.83	39.5168	4.20898e-15	Yes
ENSG00000019991	3082	HGF	hepatocyte growth factor	83.5214	45.3194	64.4204	1.84295	0.153017	No	113.552	49.7513	81.6518	2.2824	0.13403	No
ENSG00000019995	54764	ZRANB1	zinc finger RANBP2-type containing 1	1780.41	2519	2149.7	-1.41484	0.013087	No	2463.09	2591.36	2527.22	-1.05208	0.539053	No
ENSG00000020129	23154	NCDN	neurochondrin	22548	3744.66	13146.3	6.02137	7.52734e-06	Yes	22650.8	2741.26	12696	8.26291	3.1675e-14	Yes
ENSG00000020181	25960	ADGRA2	adhesion G protein-coupled receptor A2	359.505	266.772	313.139	1.34761	0.423116	No	575.825	471.386	523.606	1.22156	0.360199	No
ENSG00000020256	55734	ZFP64	ZFP64 zinc finger protein	397.895	730.884	564.389	-1.83688	0.000632793	No	418.531	797.262	607.896	-1.9049	3.7328e-08	No
ENSG00000020426	4331	MNAT1	MNAT1 component of CDK activating kinase	156.64	192.012	174.326	-1.22582	0.447152	No	435.1	338.849	386.974	1.28405	0.0260737	No
ENSG00000020577	23034	SAMD4A	sterile alpha motif domain containing 4A	896.361	241.558	568.959	3.71074	0.000108002	Yes	854.167	501.037	677.602	1.7048	0.0142604	No
ENSG00000020633	864	RUNX3	RUNX family transcription factor 3	12.0163	2.3436	7.17996	5.12728	2.8696e-05	Yes	19.0335	2.9545	10.994	6.44221	1.71759e-05	Yes
ENSG00000020922	4361	MRE11	MRE11 homolog, double strand break repair nuclease	96.477	167.81	132.143	-1.73938	0.0554988	No	133.312	297.931	215.621	-2.23484	0.000422564	Yes
ENSG00000021300	58473	PLEKHB1	pleckstrin homology domain containing B1	10794.7	149.53	5472.13	72.191	1.34243e-10	Yes	11548.4	265.207	5906.79	43.5447	1.01249e-14	Yes
ENSG00000021355	1992	SERPINB1	serpin family B member 1	166.508	39.4527	102.98	4.22044	0.00085616	Yes	231.803	60.0867	145.945	3.85781	1.0768e-07	Yes
ENSG00000021461	64816	CYP3A43	cytochrome P450 family 3 subfamily A member 43	3.41361	0.696492	2.05505	4.90116	0.00035843	Yes	6.13901	2.81536	4.47719	2.18054	0.029792	Yes
ENSG00000021488	11136	SLC7A9	solute carrier family 7 member 9	4.1979	7.70326	5.95058	-1.83503	0.368132	No	17.6682	59.1606	38.4144	-3.34842	4.85166e-06	Yes
ENSG00000021574	6683	SPAST	spastin	794.008	3525.97	2159.99	-4.44072	1.45041e-05	Yes	850.089	3133.59	1991.84	-3.68619	1.19212e-10	Yes
ENSG00000021645	9369	NRXN3	neurexin 3	4009.42	313.848	2161.63	12.775	4.66617e-07	Yes	4131.59	693.261	2412.43	5.95964	1.47924e-05	Yes
ENSG00000021762	114879	OSBPL5	oxysterol binding protein like 5	501.108	1184.3	842.702	-2.36335	0.0012758	Yes	649.922	1704.88	1177.4	-2.62321	9.34508e-07	Yes
ENSG00000021776	9716	AQR	aquarius intron-binding spliceosomal factor	431.924	1041.88	736.9	-2.41218	0.000914182	Yes	466.602	1123.47	795.034	-2.40776	6.88272e-07	Yes
ENSG00000021826	1373	CPS1	carbamoyl-phosphate synthase 1	111.556	17.5385	64.5471	6.3606	0.000184679	Yes	134.928	46.3001	90.6139	2.9142	0.000253118	Yes
ENSG00000022267	2273	FHL1	four and a half LIM domains 1	4391.11	4567.16	4479.13	-1.04009	0.79465	No	6815.96	5701.35	6258.66	1.1955	0.0959599	No
ENSG00000022277	51507	RTF2	replication termination factor 2	1835.39	1802.4	1818.89	1.0183	0.92535	No	2439.45	1630.72	2035.08	1.49593	1.07749e-06	No
ENSG00000022355	2554	GABRA1	gamma-aminobutyric acid type A receptor alpha1 subunit	8500.13	40.709	4270.42	208.802	1.01481e-08	Yes	8123.66	62.962	4093.31	129.025	4.90059e-12	Yes
ENSG00000022556	55655	NLRP2	NLR family pyrin domain containing 2	194.064	217.715	205.889	-1.12188	0.832028	No	105.599	265.185	185.392	-2.51124	0.115661	No
ENSG00000022567	57210	SLC45A4	solute carrier family 45 member 4	1637.51	307.131	972.321	5.33163	8.27166e-07	Yes	1450.67	440.84	945.755	3.29069	9.01798e-13	Yes
ENSG00000022840	9921	RNF10	ring finger protein 10	4978.36	5157.13	5067.74	-1.03591	0.814556	No	5044.77	5290.8	5167.79	-1.04877	0.486238	No
ENSG00000022976	55778	ZNF839	zinc finger protein 839	492.207	387.176	439.691	1.27127	0.175929	No	391.701	409.253	400.477	-1.04481	0.68304	No
ENSG00000023041	64429	ZDHHC6	zinc finger DHHC-type containing 6	522.666	691.303	606.985	-1.32265	0.0708894	No	858.234	995.516	926.875	-1.15996	0.0421476	No
ENSG00000023171	57476	GRAMD1B	GRAM domain containing 1B	5120.57	1675.31	3397.94	3.05649	0.000475249	Yes	5377.52	2050.86	3714.19	2.62208	3.83857e-07	Yes
ENSG00000023191	6050	RNH1	ribonuclease/angiogenin inhibitor 1	2316.77	2200.44	2258.6	1.05286	0.747241	No	1677.32	1381.76	1529.54	1.2139	0.225013	No
ENSG00000023228	4719	NDUFS1	NADH:ubiquinone oxidoreductase core subunit S1	2968.01	1685.76	2326.89	1.76064	0.00161352	No	3943.29	2286.93	3115.11	1.72427	3.4262e-06	No
ENSG00000023287	9821	RB1CC1	RB1 inducible coiled-coil 1	3265.61	3722.76	3494.19	-1.13999	0.591053	No	3833.3	3380.68	3606.99	1.13389	0.421783	No
ENSG00000023318	23071	ERP44	endoplasmic reticulum protein 44	472.551	787.062	629.807	-1.66556	0.00666952	No	794.85	1013.25	904.049	-1.27477	0.00456035	No
ENSG00000023330	211	ALAS1	5'-aminolevulinate synthase 1	1450.39	1662.06	1556.23	-1.14594	0.397051	No	1591.73	1328.38	1460.06	1.19825	0.0491508	No
ENSG00000023445	330	BIRC3	baculoviral IAP repeat containing 3	74.5835	6.46902	40.5263	11.5293	4.18196e-06	Yes	97.2353	14.4364	55.8358	6.73544	3.40623e-10	Yes
ENSG00000023516	11215	AKAP11	A-kinase anchoring protein 11	7713	4025.07	5869.03	1.91624	0.022669	No	5556.48	2991.56	4274.02	1.85739	0.00313736	No
ENSG00000023572	51022	GLRX2	glutaredoxin 2	267.955	104.832	186.393	2.55604	0.00258875	Yes	331.947	76.4598	204.203	4.34146	3.78978e-11	Yes
ENSG00000023608	6617	SNAPC1	small nuclear RNA activating complex polypeptide 1	43.9094	85.082	64.4957	-1.93767	0.0585965	No	89.3966	159.604	124.5	-1.78534	0.00110032	No
ENSG00000023697	51071	DERA	deoxyribose-phosphate aldolase	201.19	431.953	316.572	-2.14699	0.0117797	Yes	259.202	354.889	307.046	-1.36916	0.157674	No
ENSG00000023734	11171	STRAP	serine/threonine kinase receptor associated protein	3157.75	4022.33	3590.04	-1.2738	0.205205	No	4331.12	3989.87	4160.49	1.08553	0.181752	No
ENSG00000023839	1244	ABCC2	ATP binding cassette subfamily C member 2	3.89185	3.48263	3.68724	1.1175	0.8428	No	8.91465	22.4137	15.6642	-2.51426	7.31428e-05	Yes
ENSG00000023892	50619	DEF6	DEF6 guanine nucleotide exchange factor	44.1142	15.5316	29.8229	2.84028	0.00227476	Yes	77.2354	36.6917	56.9635	2.10499	0.000604997	Yes
ENSG00000023902	51177	PLEKHO1	pleckstrin homology domain containing O1	1036.39	3278.45	2157.42	-3.16335	3.23119e-07	Yes	1642.27	3175.35	2408.81	-1.93351	1.00468e-05	No
ENSG00000023909	2730	GCLM	glutamate-cysteine ligase modifier subunit	355.631	182.945	269.288	1.94392	0.00511312	No	443.887	233.323	338.605	1.90245	2.15746e-06	No
ENSG00000024048	23304	UBR2	ubiquitin protein ligase E3 component n-recognin 2	864.333	914.444	889.388	-1.05798	0.798661	No	1202.9	1409.52	1306.21	-1.17177	0.0759732	No
ENSG00000024422	30846	EHD2	EH domain containing 2	646.419	82.6571	364.538	7.82049	4.4546e-06	Yes	578.345	117.992	348.169	4.90157	4.03061e-08	Yes
ENSG00000024526	55635	DEPDC1	DEP domain containing 1	7.45221	37.1345	22.2934	-4.98302	0.0145637	Yes	10.1319	203.572	106.852	-20.0921	3.35709e-05	Yes
ENSG00000024862	25901	CCDC28A	coiled-coil domain containing 28A	569.034	115.55	342.292	4.92455	2.07498e-06	Yes	1222.16	220.631	721.396	5.53938	4.87944e-15	Yes
ENSG00000025039	58528	RRAGD	Ras related GTP binding D	978.307	1308.19	1143.25	-1.3372	0.0936733	No	1116.75	1272.92	1194.84	-1.13984	0.26709	No
ENSG00000025156	3298	HSF2	heat shock transcription factor 2	513.08	1530.35	1021.72	-2.98268	6.83232e-06	Yes	768.496	1768.31	1268.41	-2.30101	4.46179e-12	Yes
ENSG00000025293	51230	PHF20	PHD finger protein 20	1198.78	2779.46	1989.12	-2.31858	0.000184202	Yes	1273.62	1999.9	1636.76	-1.57025	0.00642497	No
ENSG00000025423	8630	HSD17B6	hydroxysteroid 17-beta dehydrogenase 6	157.415	6.13657	81.7755	25.6519	2.49372e-07	Yes	362.531	21.2503	191.89	17.06	2.19198e-13	Yes
ENSG00000025434	10062	NR1H3	nuclear receptor subfamily 1 group H member 3	182.667	128.331	155.499	1.4234	0.0817052	No	258.695	161.682	210.188	1.60002	0.000686857	No
ENSG00000025708	1890	TYMP	thymidine phosphorylase	41.4228	13.627	27.5249	3.03975	0.00868225	Yes	25.1806	12.4506	18.8156	2.02244	0.0227053	Yes
ENSG00000025770	29781	NCAPH2	non-SMC condensin II complex subunit H2	1027.16	1348.92	1188.04	-1.31325	0.245327	No	1280.19	2149.3	1714.75	-1.67888	0.000799002	No
ENSG00000025772	10953	TOMM34	translocase of outer mitochondrial membrane 34	1536.07	334.743	935.409	4.58882	6.68933e-09	Yes	1694.84	420.659	1057.75	4.02902	2.50098e-16	Yes
ENSG00000025796	11231	SEC63	SEC63 homolog, protein translocation regulator	1380.17	2171.03	1775.6	-1.57301	0.0157364	No	2144.34	3208.05	2676.2	-1.49605	0.000766659	No
ENSG00000025800	23633	KPNA6	karyopherin subunit alpha 6	2298.82	1937.85	2118.34	1.18627	0.401903	No	1582.24	1782.32	1682.28	-1.12646	0.329322	No
ENSG00000026025	7431	VIM	vimentin	1884.71	5507.43	3696.07	-2.92216	0.0159091	Yes	3915.95	31546.2	17731.1	-8.05584	1.40792e-07	Yes
ENSG00000026036	100533107	RTEL1-TNFRSF6B	RTEL1-TNFRSF6B readthrough (NMD candidate)	35.0152	10.4454	22.7303	3.35222	0.0985848	No	85.371	125.645	105.508	-1.47175	0.0279087	No
ENSG00000026103	355	FAS	Fas cell surface death receptor	72.9879	7.25843	40.1231	10.0556	6.20643e-07	Yes	156.473	22.9218	89.6975	6.82639	5.20391e-08	Yes
ENSG00000026297	8635	RNASET2	ribonuclease T2	268.142	169.866	219.004	1.57855	0.0104473	No	558.659	249.404	404.031	2.23998	2.72783e-07	Yes
ENSG00000026508	960	CD44	CD44 molecule (Indian blood group)	142.565	27.0661	84.8157	5.26731	5.61753e-06	Yes	115.674	71.0413	93.3578	1.62827	0.169916	No
ENSG00000026559	3755	KCNG1	potassium voltage-gated channel modifier subfamily G member 1	505.3	1136.67	820.984	-2.24949	0.025901	Yes	422.107	901.741	661.924	-2.13628	0.0253876	Yes
ENSG00000026652	56895	AGPAT4	1-acylglycerol-3-phosphate O-acyltransferase 4	1780.62	1661.92	1721.27	1.07142	0.744437	No	1978.02	2884.72	2431.37	-1.45838	0.000263442	No
ENSG00000026751	57823	SLAMF7	SLAM family member 7	1.51689	0.506077	1.01148	2.99734	0.00307089	Yes	1.97438	0.776397	1.37539	2.54301	0.00345886	Yes
ENSG00000026950	11119	BTN3A1	butyrophilin subfamily 3 member A1	163.306	412.456	287.881	-2.52566	0.00291801	Yes	298.395	499.87	399.133	-1.67519	0.00673782	No
ENSG00000027001	4285	MIPEP	mitochondrial intermediate peptidase	217.28	277.996	247.638	-1.27944	0.231525	No	226.95	232.466	229.708	-1.0243	0.818369	No
ENSG00000027075	5583	PRKCH	protein kinase C eta	155.582	99.5704	127.576	1.56253	0.121365	No	169.886	136.767	153.326	1.24215	0.361769	No
ENSG00000027644	3645	INSRR	insulin receptor related receptor	10.2097	5.49204	7.85085	1.85899	0.271103	No	3.70575	29.0144	16.3601	-7.82956	0.000980565	Yes
ENSG00000027697	3459	IFNGR1	interferon gamma receptor 1	680.569	628.449	654.509	1.08293	0.742756	No	1092.16	803.476	947.819	1.3593	0.000802922	No
ENSG00000027847	11285	B4GALT7	beta-1,4-galactosyltransferase 7	375.588	415.498	395.543	-1.10626	0.558129	No	496.681	466.005	481.343	1.06583	0.653134	No
ENSG00000027869	9047	SH2D2A	SH2 domain containing 2A	4.25763	16.8265	10.5421	-3.95209	0.00231781	Yes	7.3449	10.7967	9.0708	-1.46996	0.29383	No
ENSG00000028116	7444	VRK2	VRK serine/threonine kinase 2	71.6287	62.1305	66.8796	1.15287	0.70839	No	78.1373	117.024	97.5808	-1.49768	0.112392	No
ENSG00000028137	7133	TNFRSF1B	TNF receptor superfamily member 1B	136.052	84.0297	110.041	1.6191	0.0935277	No	153.013	99.8106	126.412	1.53303	0.03202	No
ENSG00000028203	55591	VEZT	vezatin, adherens junctions transmembrane protein	1259.91	2703.94	1981.92	-2.14613	0.000280124	Yes	1777.7	2935.92	2356.81	-1.65153	1.92263e-05	No
ENSG00000028277	5452	POU2F2	POU class 2 homeobox 2	86.7412	310.579	198.66	-3.58052	0.00268488	Yes	302.267	1371.69	836.981	-4.53802	1.7763e-07	Yes
ENSG00000028310	65980	BRD9	bromodomain containing 9	982.233	1453.9	1218.06	-1.48019	0.00545848	No	1285.08	1966.67	1625.87	-1.53039	2.33459e-07	No
ENSG00000028528	6642	SNX1	sorting nexin 1	1577.27	1071.15	1324.21	1.4725	0.0205979	No	2111.5	2150.08	2130.79	-1.01827	0.83119	No
ENSG00000028839	9519	TBPL1	TATA-box binding protein like 1	761.509	825.361	793.435	-1.08385	0.749715	No	1309.26	1088.81	1199.04	1.20247	0.0278679	No
ENSG00000029153	56938	ARNTL2	aryl hydrocarbon receptor nuclear translocator like 2	357.477	87.9688	222.723	4.06368	0.000186306	Yes	289.761	146.425	218.093	1.9789	0.0513071	No
ENSG00000029363	9774	BCLAF1	BCL2 associated transcription factor 1	2667.2	5869.12	4268.16	-2.20048	0.000485694	Yes	3981.95	6446.73	5214.34	-1.61899	7.00656e-05	No
ENSG00000029364	55334	SLC39A9	solute carrier family 39 member 9	1845.16	2082.38	1963.77	-1.12857	0.493706	No	1575.95	1700.01	1637.98	-1.07872	0.343505	No
ENSG00000029534	286	ANK1	ankyrin 1	623.775	327.758	475.767	1.90316	0.112136	No	717.141	309.951	513.546	2.31372	0.000566093	Yes
ENSG00000029559	3381	IBSP	integrin binding sialoprotein	2.7702	1.19521	1.9827	2.31775	0.155837	No	4.16727	0.779526	2.4734	5.3459	7.17677e-07	Yes
ENSG00000029639	51106	TFB1M	transcription factor B1, mitochondrial	131.948	142.857	137.403	-1.08268	0.700741	No	223.58	163.342	193.461	1.36878	0.00722175	No
ENSG00000029725	9135	RABEP1	rabaptin, RAB GTPase binding effector protein 1	3670.91	4571.22	4121.07	-1.24526	0.270669	No	4500.58	4095.96	4298.27	1.09878	0.451607	No
ENSG00000029993	3149	HMGB3	high mobility group box 3	440.139	3528.33	1984.23	-8.0164	1.6546e-09	Yes	799.814	4751.7	2775.76	-5.94101	3.30459e-11	Yes
ENSG00000030066	23279	NUP160	nucleoporin 160	271.564	2013.47	1142.52	-7.41435	5.94969e-10	Yes	388.362	2464.34	1426.35	-6.34549	1.82567e-15	Yes
ENSG00000030110	578	BAK1	BCL2 antagonist/killer 1	153.799	140.365	147.082	1.09571	0.686282	No	227.036	205.015	216.025	1.10741	0.372083	No
ENSG00000030304	4593	MUSK	muscle associated receptor tyrosine kinase	3.28351	0.822049	2.05278	3.99429	0.00767655	Yes	2.03227	0.838227	1.43525	2.42449	0.00532474	Yes
ENSG00000030419	22807	IKZF2	IKAROS family zinc finger 2	85.968	303.799	194.883	-3.53386	0.00104909	Yes	97.3653	242.724	170.045	-2.49292	0.00204669	Yes
ENSG00000030582	2896	GRN	granulin precursor	1146.78	644.601	895.691	1.77906	0.00369253	No	1081.12	812.717	946.919	1.33025	0.0687051	No
ENSG00000031003	51306	FAM13B	family with sequence similarity 13 member B	1377.27	1527.18	1452.22	-1.10884	0.679938	No	1978	2239	2108.5	-1.13195	0.486342	No
ENSG00000031081	57514	ARHGAP31	Rho GTPase activating protein 31	378.634	212.951	295.793	1.77804	0.0296175	No	446.829	293.432	370.131	1.52277	0.066107	No
ENSG00000031691	55166	CENPQ	centromere protein Q	88.9071	71.1473	80.0272	1.24962	0.690526	No	117.306	228.328	172.817	-1.94642	0.0272834	No
ENSG00000031698	6301	SARS	seryl-tRNA synthetase	5833.19	4818.93	5326.06	1.21047	0.18361	No	8196.63	4618.48	6407.56	1.77475	1.11584e-08	No
ENSG00000031823	8498	RANBP3	RAN binding protein 3	1274.07	1774.44	1524.26	-1.39274	0.0546909	No	1787.12	2197.35	1992.23	-1.22955	0.0319483	No
ENSG00000032219	5926	ARID4A	AT-rich interaction domain 4A	667.769	1652.76	1160.26	-2.47505	0.000412665	Yes	926.21	1739.37	1332.79	-1.87794	6.2625e-05	No
ENSG00000032389	7260	EIPR1	EARP complex and GARP complex interacting protein 1	1087.27	1176.58	1131.92	-1.08215	0.649038	No	1378.02	967.583	1172.8	1.42418	0.00082616	No
ENSG00000032444	10908	PNPLA6	patatin like phospholipase domain containing 6	2981.82	1395.77	2188.8	2.13632	0.000159321	Yes	2207.39	1314.5	1760.94	1.67927	0.000416469	No
ENSG00000032742	8100	IFT88	intraflagellar transport 88	238.481	352.135	295.308	-1.47658	0.0868659	No	377.443	510.881	444.162	-1.35353	0.00362564	No
ENSG00000033011	56052	ALG1	ALG1 chitobiosyldiphosphodolichol beta-mannosyltransferase	226.973	152.479	189.726	1.48855	0.0379312	No	496.501	335.307	415.904	1.48073	3.35627e-05	No
ENSG00000033030	55596	ZCCHC8	zinc finger CCHC-type containing 8	160.304	571	365.652	-3.56198	1.05321e-07	Yes	385.647	1179.95	782.801	-3.05968	3.94632e-12	Yes
ENSG00000033050	10061	ABCF2	ATP binding cassette subfamily F member 2	1599.72	1420.95	1510.33	1.12581	0.339049	No	2058.92	1445.87	1752.39	1.424	3.01918e-05	No
ENSG00000033100	54480	CHPF2	chondroitin polymerizing factor 2	688.774	506.871	597.823	1.35888	0.110112	No	788.584	618.309	703.447	1.27539	0.0882888	No
ENSG00000033122	57554	LRRC7	leucine rich repeat containing 7	1348.27	2300.4	1824.33	-1.70618	0.0796956	No	2120.53	3270.75	2695.64	-1.54242	0.187911	No
ENSG00000033170	2530	FUT8	fucosyltransferase 8	1262.15	1017.66	1139.91	1.24025	0.212966	No	1195.53	1334.71	1265.12	-1.11642	0.370685	No
ENSG00000033178	55236	UBA6	ubiquitin like modifier activating enzyme 6	715.381	1549.33	1132.36	-2.16575	0.000393634	Yes	1120.49	2616.48	1868.49	-2.33512	5.23657e-07	Yes
ENSG00000033327	9846	GAB2	GRB2 associated binding protein 2	2054.5	3007.2	2530.85	-1.46371	0.12688	No	1673.73	2431.82	2052.78	-1.45293	0.0883794	No
ENSG00000033627	535	ATP6V0A1	ATPase H+ transporting V0 subunit a1	12854	3441.4	8147.71	3.73511	6.97373e-06	Yes	11109.6	3740.43	7425.01	2.97013	8.05288e-11	Yes
ENSG00000033800	8554	PIAS1	protein inhibitor of activated STAT 1	545.404	803.359	674.381	-1.47296	0.090078	No	674.52	774.508	724.514	-1.14824	0.451781	No
ENSG00000033867	9497	SLC4A7	solute carrier family 4 member 7	176.226	681.239	428.732	-3.86571	5.53697e-06	Yes	242.849	1506.73	874.79	-6.20439	9.97244e-11	Yes
ENSG00000034053	321	APBA2	amyloid beta precursor protein binding family A member 2	6372.68	4704.28	5538.48	1.35465	0.0975316	No	7160.62	5171.21	6165.91	1.38471	0.00135666	No
ENSG00000034063	---	---	---	11.0003	311.329	161.164	-28.3019	6.19654e-06	Yes	13.6827	1016.94	515.313	-74.3235	6.34354e-07	Yes
ENSG00000034152	5606	MAP2K3	mitogen-activated protein kinase kinase 3	261.473	214.329	237.901	1.21996	0.267483	No	319.252	302.808	311.03	1.0543	0.694767	No
ENSG00000034239	79645	EFCAB1	EF-hand calcium binding domain 1	75.841	15.8801	45.8606	4.77585	0.00228798	Yes	171.04	55.7441	113.392	3.06831	0.00250647	Yes
ENSG00000034510	9168	TMSB10	thymosin beta 10	9835.89	39326.2	24581	-3.99823	4.71274e-05	Yes	23479.8	29509.2	26494.5	-1.25679	0.0976825	No
ENSG00000034533	28990	ASTE1	asteroid homolog 1	102.038	208.209	155.123	-2.0405	0.000838455	Yes	192.378	275.706	234.042	-1.43315	0.00350597	No
ENSG00000034677	25897	RNF19A	ring finger protein 19A, RBR E3 ubiquitin protein ligase	1241.84	1247.93	1244.88	-1.00491	0.979729	No	1743.54	1471.54	1607.54	1.18484	0.349217	No
ENSG00000034693	8504	PEX3	peroxisomal biogenesis factor 3	234.423	256.014	245.218	-1.0921	0.69171	No	377.298	344.21	360.754	1.09613	0.31474	No
ENSG00000034713	11345	GABARAPL2	GABA type A receptor associated protein like 2	4221.27	3363.01	3792.14	1.25521	0.244117	No	5874.95	3431.93	4653.44	1.71185	5.50336e-09	No
ENSG00000034971	4653	MYOC	myocilin	1.03114	0.899466	0.965305	1.14639	0.803394	No	1.14433	1.55807	1.3512	-1.36155	0.530367	No
ENSG00000035115	26751	SH3YL1	SH3 and SYLF domain containing 1	545.232	578.78	562.006	-1.06153	0.711604	No	1156.51	1252.2	1204.35	-1.08274	0.431691	No
ENSG00000035141	84908	FAM136A	family with sequence similarity 136 member A	472.274	821.003	646.639	-1.7384	0.00192147	No	789.136	866.665	827.9	-1.09825	0.307963	No
ENSG00000035403	7414	VCL	vinculin	751.242	549.102	650.172	1.36813	0.336864	No	974.574	1182.35	1078.46	-1.21319	0.169157	No
ENSG00000035499	55789	DEPDC1B	DEP domain containing 1B	21.8875	183.375	102.631	-8.37807	0.000195497	Yes	20.6705	475.204	247.937	-22.9895	8.59284e-08	Yes
ENSG00000035664	23604	DAPK2	death associated protein kinase 2	138.914	24.5846	81.7491	5.65042	0.00105538	Yes	203.855	124.164	164.009	1.64182	0.0195388	No
ENSG00000035681	8439	NSMAF	neutral sphingomyelinase activation associated factor	371.709	497.171	434.44	-1.33753	0.106282	No	745.109	867.416	806.262	-1.16415	0.134449	No
ENSG00000035687	159	ADSS	adenylosuccinate synthase	1216.11	1324.67	1270.39	-1.08926	0.653501	No	1463.17	1425.94	1444.56	1.02611	0.795026	No
ENSG00000035862	7077	TIMP2	TIMP metallopeptidase inhibitor 2	5556.71	7268.03	6412.37	-1.30797	0.19095	No	6269.37	6118.24	6193.8	1.0247	0.889207	No
ENSG00000035928	5981	RFC1	replication factor C subunit 1	884.363	1179.59	1031.98	-1.33383	0.124081	No	1131.84	1714.5	1423.17	-1.51479	0.00066325	No
ENSG00000036054	55773	TBC1D23	TBC1 domain family member 23	631.201	991.252	811.226	-1.57042	0.0421864	No	798.352	973.187	885.769	-1.219	0.0751167	No
ENSG00000036257	8452	CUL3	cullin 3	2168.06	3461.26	2814.66	-1.59648	0.0225302	No	2680.25	3514.08	3097.17	-1.3111	0.0021444	No
ENSG00000036448	9172	MYOM2	myomesin 2	755.888	233.888	494.888	3.23184	6.76072e-05	Yes	980.168	229.834	605.001	4.26468	1.07039e-11	Yes
ENSG00000036473	5009	OTC	ornithine carbamoyltransferase	3.10792	0.665174	1.88655	4.67234	0.00550315	Yes	4.60358	0.822049	2.71282	5.60013	7.26858e-07	Yes
ENSG00000036530	10858	CYP46A1	cytochrome P450 family 46 subfamily A member 1	3470.58	66.4765	1768.53	52.2076	3.85244e-11	Yes	2982.8	123.612	1553.21	24.1303	3.46395e-15	Yes
ENSG00000036549	26009	ZZZ3	zinc finger ZZ-type containing 3	652.645	1273.39	963.015	-1.95112	0.000594593	No	795.703	1420.47	1108.09	-1.78518	4.31418e-05	No
ENSG00000036565	6570	SLC18A1	solute carrier family 18 member A1	1.09223	1.13013	1.11118	-1.0347	0.953832	No	1.8506	5.32331	3.58696	-2.87653	0.111759	No
ENSG00000036672	9099	USP2	ubiquitin specific peptidase 2	855.058	95.88	475.469	8.918	2.90664e-07	Yes	923.709	147.521	535.615	6.26155	3.55685e-11	Yes
ENSG00000036828	846	CASR	calcium sensing receptor	4.97377	0.461279	2.71752	10.7826	2.19865e-05	Yes	1.11976	1.0586	1.08918	1.05777	0.888563	No
ENSG00000037042	27175	TUBG2	tubulin gamma 2	2973.27	368.169	1670.72	8.07581	4.6883e-08	Yes	4762.31	875.922	2819.12	5.43692	7.51003e-15	Yes
ENSG00000037241	51121	RPL26L1	ribosomal protein L26 like 1	207.829	446.604	327.217	-2.14891	0.00182734	Yes	417.974	415.83	416.902	1.00516	0.967219	No
ENSG00000037280	2324	FLT4	fms related tyrosine kinase 4	81.3	118.912	100.106	-1.46264	0.148315	No	100.241	233.049	166.645	-2.32488	0.000116711	Yes
ENSG00000037474	54888	NSUN2	NOP2/Sun RNA methyltransferase 2	572.381	747.915	660.148	-1.30667	0.140596	No	1251.48	1586.37	1418.92	-1.26759	0.017092	No
ENSG00000037637	54455	FBXO42	F-box protein 42	839.468	1452.93	1146.2	-1.73077	0.00051559	No	1058.94	1829.8	1444.37	-1.72796	2.66707e-09	No
ENSG00000037749	4238	MFAP3	microfibril associated protein 3	464.705	2122.88	1293.79	-4.56823	5.06306e-06	Yes	535.991	1530.57	1033.28	-2.85559	3.31028e-06	Yes
ENSG00000037757	84245	MRI1	methylthioribose-1-phosphate isomerase 1	100.036	88.3714	94.2035	1.13199	0.77083	No	393.917	510.264	452.09	-1.29536	0.0983203	No
ENSG00000037897	4234	METTL1	methyltransferase like 1	127.018	81.1432	104.081	1.56536	0.0688672	No	180.897	112.557	146.727	1.60716	0.00165548	No
ENSG00000038002	175	AGA	aspartylglucosaminidase	238.535	122.294	180.415	1.9505	0.0118586	No	268.664	178.636	223.65	1.50397	0.0194947	No
ENSG00000038210	55300	PI4K2B	phosphatidylinositol 4-kinase type 2 beta	52.7594	83.6361	68.1977	-1.58524	0.163702	No	117.756	262.203	189.979	-2.22666	2.6298e-05	Yes
ENSG00000038219	259282	BOD1L1	biorientation of chromosomes in cell division 1 like 1	1787.32	1752.56	1769.94	1.01983	0.957732	No	2051.33	2438.81	2245.07	-1.18889	0.300446	No
ENSG00000038274	27430	MAT2B	methionine adenosyltransferase 2B	1982.57	845.941	1414.25	2.34362	0.0129796	Yes	2147.33	1422.95	1785.14	1.50907	0.0129024	No
ENSG00000038295	7092	TLL1	tolloid like 1	59.1325	25.8747	42.5036	2.28535	0.0798237	No	71.6902	40.6917	56.1909	1.76179	0.289719	No
ENSG00000038358	23644	EDC4	enhancer of mRNA decapping 4	1121.59	1756.35	1438.97	-1.56595	0.0570387	No	1046.25	1803.05	1424.65	-1.72335	7.25453e-07	No
ENSG00000038382	7204	TRIO	trio Rho guanine nucleotide exchange factor	3793.64	7953.48	5873.56	-2.09653	0.0357391	Yes	3890.61	7854.35	5872.48	-2.0188	0.000400034	Yes
ENSG00000038427	1462	VCAN	versican	679.888	8750.5	4715.2	-12.8705	2.2392e-07	Yes	949.021	10028.2	5488.63	-10.5669	7.45699e-11	Yes
ENSG00000038532	23274	CLEC16A	C-type lectin domain containing 16A	1096.81	1073.58	1085.2	1.02164	0.932117	No	1339.39	1445.84	1392.62	-1.07948	0.381298	No
ENSG00000038945	4481	MSR1	macrophage scavenger receptor 1	17.5079	3.62917	10.5685	4.8242	0.000973403	Yes	24.6808	2.51633	13.5986	9.80824	6.94367e-08	Yes
ENSG00000039068	999	CDH1	cadherin 1	38.984	89.857	64.4205	-2.30497	0.181466	No	60.2383	97.2104	78.7244	-1.61376	0.210631	No
ENSG00000039123	23517	MTREX	Mtr4 exosome RNA helicase	1036.81	2080.17	1558.49	-2.00633	0.00378442	Yes	1371.33	2145.41	1758.37	-1.56447	3.11979e-06	No
ENSG00000039139	1767	DNAH5	dynein axonemal heavy chain 5	67.1736	64.2737	65.7237	1.04512	0.914928	No	78.6141	106.393	92.5035	-1.35336	0.307435	No
ENSG00000039319	9765	ZFYVE16	zinc finger FYVE-type containing 16	874.906	546.252	710.579	1.60165	0.050084	No	1266.83	1431.99	1349.41	-1.13037	0.431141	No
ENSG00000039523	79567	RIPOR1	RHO family interacting cell polarization regulator 1	2520.11	2062.25	2291.18	1.22202	0.516191	No	3353.48	3266.13	3309.8	1.02674	0.864528	No
ENSG00000039537	729	C6	complement C6	1.76411	0.908315	1.33621	1.94218	0.149086	No	4.17607	2.66589	3.42098	1.56648	0.280677	No
ENSG00000039560	26064	RAI14	retinoic acid induced 14	161.426	2650.35	1405.89	-16.4183	6.36642e-10	Yes	178.688	2764.83	1471.76	-15.4729	5.34218e-11	Yes
ENSG00000039600	11063	SOX30	SRY-box 30	3.84411	8.80689	6.3255	-2.29101	0.0455857	Yes	9.01936	5.24738	7.13337	1.71883	0.0862504	No
ENSG00000039650	11284	PNKP	polynucleotide kinase 3'-phosphatase	396.514	396.898	396.706	-1.00097	0.995836	No	622.652	731.382	677.017	-1.17462	0.241767	No
ENSG00000039987	54831	BEST2	bestrophin 2	1.36389	1.10141	1.23265	1.23831	0.711604	No	1.03665	2.62038	1.82851	-2.52774	0.0028243	Yes
ENSG00000040199	23035	PHLPP2	PH domain and leucine rich repeat protein phosphatase 2	1215.5	510.076	862.79	2.38298	0.000388413	Yes	1522.77	941.832	1232.3	1.61682	0.00102062	No
ENSG00000040275	54908	SPDL1	spindle apparatus coiled-coil protein 1	129.183	399.744	264.463	-3.09441	5.97771e-05	Yes	204.903	706.566	455.735	-3.44829	4.50207e-11	Yes
ENSG00000040341	27067	STAU2	staufen double-stranded RNA binding protein 2	2962.94	2929.15	2946.04	1.01154	0.963536	No	3641.1	2860.24	3250.67	1.27301	0.0584498	No
ENSG00000040487	54896	PQLC2	PQ loop repeat containing 2	213.923	239.4	226.662	-1.11909	0.578205	No	223.51	282.958	253.234	-1.26598	0.0681056	No
ENSG00000040531	1497	CTNS	cystinosin, lysosomal cystine transporter	200.184	177.581	188.883	1.12728	0.605546	No	219.958	258.952	239.455	-1.17728	0.15195	No
ENSG00000040608	65078	RTN4R	reticulon 4 receptor	1849.43	933.378	1391.4	1.98144	0.0043339	No	850.783	661.461	756.122	1.28622	0.329322	No
ENSG00000040633	79142	PHF23	PHD finger protein 23	772.674	1271.04	1021.86	-1.64499	0.00321973	No	1145.45	1462.46	1303.96	-1.27675	0.0339073	No
ENSG00000040731	1008	CDH10	cadherin 10	1252.48	539.271	895.877	2.32255	0.00730611	Yes	1899.83	464.513	1182.17	4.08994	3.62534e-06	Yes
ENSG00000040933	3631	INPP4A	inositol polyphosphate-4-phosphatase type I A	3316.39	2519.83	2918.11	1.31612	0.163925	No	3131.1	2454.28	2792.69	1.27577	0.110976	No
ENSG00000041353	5874	RAB27B	RAB27B, member RAS oncogene family	1092.47	21.4786	556.976	50.8633	3.63405e-09	Yes	1276.82	69.0391	672.928	18.4941	7.71621e-07	Yes
ENSG00000041357	5685	PSMA4	proteasome subunit alpha 4	1180.03	1652.13	1416.08	-1.40008	0.206818	No	1976.34	2466.91	2221.63	-1.24822	0.059786	No
ENSG00000041515	23026	MYO16	myosin XVI	488.142	1255.11	871.624	-2.57119	0.0249422	Yes	416.779	883.698	650.239	-2.1203	0.0162653	Yes
ENSG00000041802	55341	LSG1	large 60S subunit nuclear export GTPase 1	465.271	682.091	573.681	-1.46601	0.0154264	No	527.838	786.861	657.349	-1.49072	0.00227337	No
ENSG00000041880	10039	PARP3	poly(ADP-ribose) polymerase family member 3	329.765	100.935	215.35	3.26709	2.69775e-05	Yes	602.937	177.529	390.233	3.39628	1.4657e-13	Yes
ENSG00000041982	3371	TNC	tenascin C	111.75	303.24	207.495	-2.71356	0.243613	No	125.759	909.613	517.686	-7.23299	0.027399	Yes
ENSG00000041988	90326	THAP3	THAP domain containing 3	263.662	510.267	386.965	-1.93531	0.00219865	No	486.547	652.303	569.425	-1.34068	0.0175934	No
ENSG00000042062	140876	RIPOR3	RIPOR family member 3	52.0303	7.64849	29.8394	6.80269	0.000362166	Yes	70.4891	80.7139	75.6015	-1.14505	0.747083	No
ENSG00000042088	55775	TDP1	tyrosyl-DNA phosphodiesterase 1	213.906	434.609	324.257	-2.03177	0.00115976	Yes	360.878	715.768	538.323	-1.98341	2.64718e-09	No
ENSG00000042286	84883	AIFM2	apoptosis inducing factor mitochondria associated 2	124.146	56.3665	90.2564	2.20248	0.0049315	Yes	383.092	97.4614	240.277	3.93071	3.1488e-09	Yes
ENSG00000042304	56918	C2orf83	chromosome 2 open reading frame 83	0.569322	0.554892	0.562107	1.026	0.935509	No	0.636539	1.45149	1.04401	-2.28028	0.134792	No
ENSG00000042317	55812	SPATA7	spermatogenesis associated 7	341.443	385.547	363.495	-1.12917	0.587237	No	709.665	551.768	630.716	1.28616	0.0219511	No
ENSG00000042429	9440	MED17	mediator complex subunit 17	365.852	1122.17	744.008	-3.06727	1.13311e-06	Yes	497.217	1448.02	972.617	-2.91225	1.43452e-13	Yes
ENSG00000042445	54884	RETSAT	retinol saturase	976.437	278.522	627.48	3.50578	8.61334e-08	Yes	1159.12	392.962	776.042	2.94971	5.37166e-16	Yes
ENSG00000042493	822	CAPG	capping actin protein, gelsolin like	194.363	141.194	167.778	1.37656	0.536058	No	309.495	225.311	267.403	1.37363	0.464392	No
ENSG00000042753	1175	AP2S1	adaptor related protein complex 2 subunit sigma 1	2219.32	1735.49	1977.41	1.27879	0.221976	No	2849.34	1152.73	2001.04	2.47183	4.46433e-08	Yes
ENSG00000042781	7399	USH2A	usherin	6.57926	2.71679	4.64802	2.42171	0.102128	No	10.0303	4.17915	7.10474	2.40008	0.0948372	No
ENSG00000042832	7038	TG	thyroglobulin	16.5235	69.5397	43.0316	-4.20854	0.000258546	Yes	21.445	18.7487	20.0968	1.14381	0.634114	No
ENSG00000042980	10863	ADAM28	ADAM metallopeptidase domain 28	38.1712	13.1506	25.6609	2.90263	0.0116095	Yes	103.454	30.8193	67.1365	3.35678	4.48161e-05	Yes
ENSG00000043039	8538	BARX2	BARX homeobox 2	27.5087	0.75665	14.1326	36.3559	1.02126e-07	Yes	20.215	1.97117	11.0931	10.2553	1.33017e-06	Yes
ENSG00000043093	54165	DCUN1D1	defective in cullin neddylation 1 domain containing 1	726.937	854.579	790.758	-1.17559	0.527567	No	996.929	950.749	973.839	1.04857	0.725253	No
ENSG00000043143	23338	JADE2	jade family PHD finger 2	2350.57	163.399	1256.98	14.3854	3.41934e-09	Yes	1995.92	142.836	1069.38	13.9735	9.10243e-12	Yes
ENSG00000043355	7546	ZIC2	Zic family member 2	160.046	280.609	220.327	-1.75331	0.229627	No	277.281	1411.22	844.252	-5.08951	0.00103858	Yes
ENSG00000043462	3937	LCP2	lymphocyte cytosolic protein 2	151.271	23.6046	87.438	6.40854	1.65742e-06	Yes	264.673	33.9827	149.328	7.78845	6.56625e-12	Yes
ENSG00000043514	54802	TRIT1	tRNA isopentenyltransferase 1	222.095	296.825	259.46	-1.33648	0.0847837	No	469.292	940.164	704.728	-2.00337	4.21918e-06	Yes
ENSG00000043591	153	ADRB1	adrenoceptor beta 1	416.553	16.7709	216.662	24.8379	4.08793e-05	Yes	378.597	11.6983	195.147	32.3634	2.51475e-08	Yes
ENSG00000044090	9820	CUL7	cullin 7	728.763	1372.74	1050.75	-1.88366	0.0042412	No	1002.95	2217.16	1610.05	-2.21064	6.56781e-13	Yes
ENSG00000044115	1495	CTNNA1	catenin alpha 1	4317.31	4377.82	4347.56	-1.01402	0.94137	No	4545.76	5169.84	4857.8	-1.13729	0.311863	No
ENSG00000044446	5256	PHKA2	phosphorylase kinase regulatory subunit alpha 2	253.725	610.12	431.922	-2.40465	4.03559e-05	Yes	593.835	946.033	769.934	-1.59309	3.02306e-05	No
ENSG00000044459	54875	CNTLN	centlein	28.5659	225.602	127.084	-7.89758	6.58639e-05	Yes	59.7374	549.927	304.832	-9.20573	7.59686e-09	Yes
ENSG00000044524	2042	EPHA3	EPH receptor A3	231.694	965.885	598.79	-4.1688	0.00737785	Yes	258.876	1469.28	864.08	-5.67562	0.000751818	Yes
ENSG00000044574	3309	HSPA5	heat shock protein family A (Hsp70) member 5	5072.7	4339.92	4706.31	1.16884	0.334175	No	6632.27	5758.62	6195.44	1.15171	0.127196	No
ENSG00000046604	1829	DSG2	desmoglein 2	11.1034	116.207	63.6553	-10.4659	0.00011501	Yes	16.4871	207.915	112.201	-12.6108	4.19825e-09	Yes
ENSG00000046647	54960	GEMIN8	gem nuclear organelle associated protein 8	217.727	337.217	277.472	-1.5488	0.00843992	No	394.737	496.797	445.767	-1.25855	0.0197532	No
ENSG00000046651	8481	OFD1	OFD1 centriole and centriolar satellite protein	200.127	355.845	277.986	-1.77809	0.0118678	No	595.029	981.381	788.205	-1.6493	0.000486555	No
ENSG00000046653	2824	GPM6B	glycoprotein M6B	18553.3	6130.52	12341.9	3.02639	1.44004e-06	Yes	19078.7	6335.76	12707.2	3.01127	5.69116e-09	Yes
ENSG00000046889	80243	PREX2	phosphatidylinositol-3,4,5-trisphosphate dependent Rac exchange factor 2	560.32	747.679	654	-1.33438	0.408557	No	662.916	665.427	664.172	-1.00379	0.990727	No
ENSG00000047056	22884	WDR37	WD repeat domain 37	1645.11	1225.23	1435.17	1.3427	0.128974	No	1345.94	1240.64	1293.29	1.08488	0.45088	No
ENSG00000047188	64848	YTHDC2	YTH domain containing 2	805.821	990.988	898.405	-1.22979	0.275074	No	1366.01	1946.03	1656.02	-1.42461	0.00318093	No
ENSG00000047230	56474	CTPS2	CTP synthase 2	85.5823	509.494	297.538	-5.95326	5.31377e-07	Yes	164.174	776.792	470.483	-4.73151	1.37043e-12	Yes
ENSG00000047249	51606	ATP6V1H	ATPase H+ transporting V1 subunit H	4532.22	1872.21	3202.21	2.42079	3.31126e-05	Yes	5729.5	1531.49	3630.5	3.74112	8.48084e-16	Yes
ENSG00000047315	5431	POLR2B	RNA polymerase II subunit B	2143.74	6318.96	4231.35	-2.94764	5.44391e-06	Yes	2692.64	5345.49	4019.06	-1.98522	1.49126e-08	No
ENSG00000047346	56204	FAM214A	family with sequence similarity 214 member A	379.408	509.704	444.556	-1.34342	0.0970251	No	695.122	946.125	820.623	-1.36109	0.0042034	No
ENSG00000047365	116984	ARAP2	ArfGAP with RhoGAP domain, ankyrin repeat and PH domain 2	1412.87	55.5274	734.2	25.4446	1.15335e-07	Yes	1671.48	113.791	892.636	14.689	1.15699e-08	Yes
ENSG00000047410	7175	TPR	translocated promoter region, nuclear basket protein	1398.6	2573.14	1985.87	-1.83979	0.0102807	No	2172.89	4609.67	3391.28	-2.12144	7.11671e-08	Yes
ENSG00000047457	1356	CP	ceruloplasmin	31.4714	1.07702	16.2742	29.2208	3.91593e-08	Yes	73.5295	3.27102	38.4003	22.4791	7.38369e-07	Yes
ENSG00000047578	23247	KIAA0556	KIAA0556	440.466	365.704	403.085	1.20443	0.519275	No	734.235	827.578	780.907	-1.12713	0.200551	No
ENSG00000047579	84062	DTNBP1	dystrobrevin binding protein 1	712.866	344.155	528.511	2.07135	0.000165299	Yes	1135.16	431.668	783.413	2.6297	6.52122e-09	Yes
ENSG00000047597	7504	XK	X-linked Kx blood group	561.854	66.4674	314.161	8.45307	1.02987e-07	Yes	516.919	68.6093	292.764	7.53423	5.03272e-13	Yes
ENSG00000047617	57101	ANO2	anoctamin 2	25.6839	18.7388	22.2114	1.37063	0.582198	No	44.7583	63.0456	53.9019	-1.40858	0.143403	No
ENSG00000047621	57102	C12orf4	chromosome 12 open reading frame 4	679.49	984.831	832.16	-1.44937	0.133417	No	883.046	887.696	885.371	-1.00527	0.965514	No
ENSG00000047634	6322	SCML1	Scm polycomb group protein like 1	140.2	205.256	172.728	-1.46402	0.237343	No	323.665	532.125	427.895	-1.64406	0.00452602	No
ENSG00000047644	55841	WWC3	WWC family member 3	403.603	269.451	336.527	1.49787	0.192907	No	659.104	880.058	769.581	-1.33524	0.00808849	No
ENSG00000047648	395	ARHGAP6	Rho GTPase activating protein 6	75.3666	22.058	48.7123	3.41675	0.0105162	Yes	123.077	45.0889	84.0831	2.72966	3.91108e-05	Yes
ENSG00000047662	27146	FAM184B	family with sequence similarity 184 member B	83.4541	425.761	254.608	-5.10174	7.98624e-05	Yes	189.617	565.969	377.793	-2.9848	0.00110123	Yes
ENSG00000047849	4134	MAP4	microtubule associated protein 4	13841.5	9723.68	11782.6	1.42348	0.0859793	No	11703.8	8763.16	10233.5	1.33557	0.00982408	No
ENSG00000047932	57120	GOPC	golgi associated PDZ and coiled-coil motif containing	1315.35	1546.67	1431.01	-1.17586	0.424117	No	1786.88	2134.2	1960.54	-1.19437	0.127972	No
ENSG00000047936	6098	ROS1	ROS proto-oncogene 1, receptor tyrosine kinase	64.6303	0.505962	32.5681	127.738	8.54765e-12	Yes	88.8124	0.715376	44.7639	124.148	2.73457e-19	Yes
ENSG00000048028	57646	USP28	ubiquitin specific peptidase 28	270.644	476.984	373.814	-1.7624	0.031157	No	605.395	1227.58	916.486	-2.02773	4.75376e-07	Yes
ENSG00000048052	9734	HDAC9	histone deacetylase 9	1410.06	1478.48	1444.27	-1.04852	0.881045	No	1238.63	1618.68	1428.66	-1.30683	0.201466	No
ENSG00000048140	26262	TSPAN17	tetraspanin 17	904.491	795.811	850.151	1.13656	0.507849	No	1450.66	1210.21	1330.44	1.19868	0.0988747	No
ENSG00000048162	51491	NOP16	NOP16 nucleolar protein	203.601	245.557	224.579	-1.20607	0.280981	No	390.06	314.532	352.296	1.24013	0.111134	No
ENSG00000048342	57545	CC2D2A	coiled-coil and C2 domain containing 2A	206.169	486.97	346.569	-2.362	2.47784e-05	Yes	336.222	774.529	555.376	-2.30362	4.10884e-09	Yes
ENSG00000048392	50484	RRM2B	ribonucleotide reductase regulatory TP53 inducible subunit M2B	739.339	635.224	687.281	1.1639	0.555939	No	932.345	580.81	756.577	1.60525	0.0248047	No
ENSG00000048405	168850	ZNF800	zinc finger protein 800	172.131	260.732	216.432	-1.51473	0.0455478	No	144.811	264.027	204.419	-1.82325	0.000796548	No
ENSG00000048462	608	TNFRSF17	TNF receptor superfamily member 17	1.07339	0.955717	1.01455	1.12313	0.794038	No	1.07965	1.44046	1.26005	-1.3342	0.489719	No
ENSG00000048471	92017	SNX29	sorting nexin 29	724.508	1670.21	1197.36	-2.3053	0.00101515	Yes	601.322	1296.34	948.833	-2.15582	2.28294e-05	Yes
ENSG00000048540	55885	LMO3	LIM domain only 3	8173.23	23441	15807.1	-2.86802	0.0175343	Yes	9583.18	7621.05	8602.12	1.25746	0.424943	No
ENSG00000048544	55173	MRPS10	mitochondrial ribosomal protein S10	566.918	603.443	585.18	-1.06443	0.800368	No	797.369	587.603	692.486	1.35699	0.00013175	No
ENSG00000048545	2978	GUCA1A	guanylate cyclase activator 1A	58.8805	73.6637	66.2721	-1.25107	0.393417	No	97.3923	89.8158	93.604	1.08436	0.74482	No
ENSG00000048649	51773	RSF1	remodeling and spacing factor 1	1260.55	3449.19	2354.87	-2.73626	9.24852e-05	Yes	1452.14	3512.94	2482.54	-2.41915	2.84855e-07	Yes
ENSG00000048707	55187	VPS13D	vacuolar protein sorting 13 homolog D	3510.84	1623.82	2567.33	2.16209	0.00500221	Yes	3778.29	2099.45	2938.87	1.79966	0.000396925	No
ENSG00000048740	10659	CELF2	CUGBP Elav-like family member 2	6415.36	10797.8	8606.56	-1.68311	0.0281095	No	7881.34	11872.2	9876.76	-1.50636	0.0498461	No
ENSG00000048828	23196	FAM120A	family with sequence similarity 120A	1744.08	736.405	1240.24	2.36837	5.2621e-06	Yes	2400.37	1457.12	1928.74	1.64734	2.58945e-08	No
ENSG00000048991	23518	R3HDM1	R3H domain containing 1	5002.12	2312.14	3657.13	2.16341	0.00204341	Yes	8496.86	2947.6	5722.23	2.88264	5.70082e-08	Yes
ENSG00000049089	1298	COL9A2	collagen type IX alpha 2 chain	1168.5	577.531	873.017	2.02328	0.0147341	Yes	1283.4	1443.61	1363.5	-1.12483	0.556008	No
ENSG00000049130	4254	KITLG	KIT ligand	850.956	361.089	606.023	2.35664	0.0173081	Yes	882.739	723.608	803.174	1.21991	0.592896	No
ENSG00000049167	1161	ERCC8	ERCC excision repair 8, CSA ubiquitin ligase complex subunit	122.293	353.873	238.083	-2.89366	0.000143067	Yes	179.094	416.902	297.998	-2.32785	4.8498e-09	Yes
ENSG00000049192	11174	ADAMTS6	ADAM metallopeptidase with thrombospondin type 1 motif 6	15.3724	67.9037	41.6381	-4.41725	0.00247108	Yes	35.3899	233.705	134.547	-6.6037	2.08377e-08	Yes
ENSG00000049239	9563	H6PD	hexose-6-phosphate dehydrogenase/glucose 1-dehydrogenase	349.937	480.021	414.979	-1.37174	0.364328	No	535.39	1081.32	808.353	-2.01968	4.97286e-06	Yes
ENSG00000049245	9341	VAMP3	vesicle associated membrane protein 3	1506.1	380.85	943.476	3.95458	3.8741e-07	Yes	1469.64	825.67	1147.65	1.77993	0.000122749	No
ENSG00000049246	8863	PER3	period circadian regulator 3	751.871	144.028	447.949	5.22031	7.38853e-07	Yes	1171.7	328.814	750.258	3.56341	5.32988e-10	Yes
ENSG00000049247	10911	UTS2	urotensin 2	1.0736	0.897423	0.985509	1.19631	0.721105	No	1.01474	0.971264	0.993	1.04476	0.919333	No
ENSG00000049283	55040	EPN3	epsin 3	58.5721	5.82427	32.1982	10.0565	0.00015748	Yes	68.9184	9.0071	38.9628	7.65157	1.39273e-07	Yes
ENSG00000049319	---	---	---	0.986206	1.1425	1.06435	-1.15848	0.776421	No	1.36178	4.16969	2.76574	-3.06194	4.37904e-05	Yes
ENSG00000049323	4052	LTBP1	latent transforming growth factor beta binding protein 1	310.572	238.509	274.54	1.30214	0.675235	No	304.729	921.955	613.342	-3.0255	0.018488	Yes
ENSG00000049449	5954	RCN1	reticulocalbin 1	561.982	281.699	421.84	1.99497	0.202946	No	1413.96	1657.88	1535.92	-1.17251	0.702884	No
ENSG00000049540	2006	ELN	elastin	253.405	224.708	239.057	1.12771	0.776058	No	392.876	505.56	449.218	-1.28682	0.478086	No
ENSG00000049541	5982	RFC2	replication factor C subunit 2	372.402	634.316	503.359	-1.70331	0.0185614	No	459.276	793.662	626.469	-1.72807	6.66709e-05	No
ENSG00000049618	57492	ARID1B	AT-rich interaction domain 1B	1573.48	3240.94	2407.21	-2.05973	0.0105438	Yes	1535.83	3468.69	2502.26	-2.25852	4.14347e-07	Yes
ENSG00000049656	81037	CLPTM1L	CLPTM1 like	1540.04	1630.28	1585.16	-1.05859	0.679938	No	1738.82	1687.27	1713.05	1.03055	0.72145	No
ENSG00000049759	23327	NEDD4L	NEDD4 like E3 ubiquitin protein ligase	3070.85	8455.05	5762.95	-2.75333	1.5527e-06	Yes	4036.71	9256.24	6646.47	-2.29302	4.71911e-08	Yes
ENSG00000049768	50943	FOXP3	forkhead box P3	13.7633	10.7179	12.2406	1.28414	0.571707	No	19.8009	12.9396	16.3702	1.53025	0.071558	No
ENSG00000049769	89801	PPP1R3F	protein phosphatase 1 regulatory subunit 3F	1679.97	483.685	1081.83	3.47328	4.6883e-08	Yes	2006.11	584.009	1295.06	3.43506	3.61155e-13	Yes
ENSG00000049860	3074	HEXB	hexosaminidase subunit beta	702.81	255.405	479.108	2.75175	1.60224e-05	Yes	1067.97	335.022	701.495	3.18776	1.51296e-12	Yes
ENSG00000049883	79810	PTCD2	pentatricopeptide repeat domain 2	224.511	162.109	193.31	1.38494	0.110684	No	258.215	157.16	207.688	1.643	0.000618204	No
ENSG00000050030	340533	NEXMIF	neurite extension and migration factor	647.236	2317.94	1482.59	-3.5813	0.000146569	Yes	650.781	1989.83	1320.3	-3.0576	6.58011e-07	Yes
ENSG00000050130	51528	JKAMP	JNK1/MAPK8 associated membrane protein	818.767	550.273	684.52	1.48793	0.0147634	No	1066.91	853.993	960.453	1.24932	0.0612163	No
ENSG00000050165	27122	DKK3	dickkopf WNT signaling pathway inhibitor 3	12562.8	3198.04	7880.41	3.92827	1.72327e-08	Yes	13434.7	2722.31	8078.51	4.93504	9.73435e-12	Yes
ENSG00000050327	7984	ARHGEF5	Rho guanine nucleotide exchange factor 5	4.54452	7.59927	6.07189	-1.67218	0.146101	No	6.07897	12.7443	9.41162	-2.09645	0.0224304	Yes
ENSG00000050344	9603	NFE2L3	nuclear factor, erythroid 2 like 3	67.1135	170.662	118.888	-2.5429	0.0160365	Yes	20.1981	140.152	80.1751	-6.93889	3.1892e-06	Yes
ENSG00000050393	63933	MCUR1	mitochondrial calcium uniporter regulator 1	1144.01	1551.47	1347.74	-1.35617	0.130582	No	1237.44	1336.36	1286.9	-1.07994	0.680782	No
ENSG00000050405	51474	LIMA1	LIM domain and actin binding 1	290.933	474.504	382.718	-1.63098	0.00641319	No	508.235	629.453	568.844	-1.23851	0.13322	No
ENSG00000050426	25875	LETMD1	LETM1 domain containing 1	1558.46	1553.97	1556.21	1.00288	0.989228	No	2146.04	1853.62	1999.83	1.15776	0.0407576	No
ENSG00000050438	9498	SLC4A8	solute carrier family 4 member 8	1262.25	1027.65	1144.95	1.22829	0.466066	No	926.787	916.462	921.624	1.01127	0.960081	No
ENSG00000050555	10319	LAMC3	laminin subunit gamma 3	181.968	137.838	159.903	1.32016	0.497773	No	156.984	238.554	197.769	-1.5196	0.199021	No
ENSG00000050628	5733	PTGER3	prostaglandin E receptor 3	205.798	27.2995	116.549	7.53854	4.95404e-05	Yes	190.255	52.7208	121.488	3.60873	0.115227	No
ENSG00000050730	79931	TNIP3	TNFAIP3 interacting protein 3	23.8259	2.79216	13.309	8.53313	2.27113e-05	Yes	10.9941	3.73489	7.36449	2.94362	0.0358027	Yes
ENSG00000050748	5601	MAPK9	mitogen-activated protein kinase 9	6251.57	1520.02	3885.8	4.11282	4.92613e-09	Yes	7331.16	2025.27	4678.21	3.61985	1.11028e-12	Yes
ENSG00000050767	91522	COL23A1	collagen type XXIII alpha 1 chain	202.754	9.50125	106.128	21.3397	3.22029e-05	Yes	460.062	58.7745	259.418	7.82758	3.46707e-06	Yes
ENSG00000050820	9564	BCAR1	BCAR1 scaffold protein, Cas family member	1758.13	1431.13	1594.63	1.22849	0.272417	No	1297.78	1498.97	1398.37	-1.15503	0.396631	No
ENSG00000051009	84067	FAM160A2	family with sequence similarity 160 member A2	890.927	903.694	897.31	-1.01433	0.94292	No	1069.62	1204.77	1137.19	-1.12635	0.164569	No
ENSG00000051108	9709	HERPUD1	homocysteine inducible ER protein with ubiquitin like domain 1	1621.86	693.334	1157.59	2.33921	4.39165e-06	Yes	2010.53	879.393	1444.96	2.28627	3.11259e-10	Yes
ENSG00000051128	9454	HOMER3	homer scaffold protein 3	198.898	381.312	290.105	-1.91713	0.0095589	No	157.549	316.597	237.073	-2.00951	0.000189151	Yes
ENSG00000051180	5888	RAD51	RAD51 recombinase	12.8012	57.02	34.9106	-4.45426	0.0177244	Yes	11.8092	198.992	105.4	-16.8506	7.27314e-06	Yes
ENSG00000051341	10721	POLQ	DNA polymerase theta	8.95376	30.8481	19.9009	-3.44526	0.0776757	No	19.0849	250.802	134.944	-13.1414	2.25733e-05	Yes
ENSG00000051382	5291	PIK3CB	phosphatidylinositol-4,5-bisphosphate 3-kinase catalytic subunit beta	2269.69	1131.21	1700.45	2.00642	0.00112141	Yes	2187.47	819.52	1503.5	2.66921	6.36473e-08	Yes
ENSG00000051523	1535	CYBA	cytochrome b-245 alpha chain	148.416	241.439	194.927	-1.62677	0.164786	No	124.919	196.069	160.494	-1.56957	0.161206	No
ENSG00000051596	84321	THOC3	THO complex 3	244.264	270.375	257.32	-1.1069	0.678874	No	212.772	230.714	221.743	-1.08432	0.614375	No
ENSG00000051620	23593	HEBP2	heme binding protein 2	156.921	662.622	409.771	-4.22263	2.58827e-06	Yes	287.153	602.344	444.748	-2.09764	7.7652e-06	Yes
ENSG00000051825	10198	MPHOSPH9	M-phase phosphoprotein 9	213.788	283.732	248.76	-1.32716	0.309602	No	437.455	838.578	638.016	-1.91695	3.42656e-05	No
ENSG00000052126	54477	PLEKHA5	pleckstrin homology domain containing A5	788.421	1219.34	1003.88	-1.54656	0.0336231	No	1424.24	2132.93	1778.58	-1.49759	0.00504658	No
ENSG00000052344	5652	PRSS8	serine protease 8	2.32517	1.78634	2.05576	1.30163	0.58085	No	2.55974	4.92554	3.74264	-1.92423	0.142053	No
ENSG00000052723	80143	SIKE1	suppressor of IKBKE 1	342.511	675.5	509.005	-1.9722	0.00721245	No	438.139	809.415	623.777	-1.84739	0.000121523	No
ENSG00000052749	23223	RRP12	ribosomal RNA processing 12 homolog	996.335	769.207	882.771	1.29527	0.105869	No	1072.96	841.744	957.352	1.27469	0.0316764	No
ENSG00000052795	57600	FNIP2	folliculin interacting protein 2	1455.17	1929.89	1692.53	-1.32622	0.237472	No	1377.08	1485.22	1431.15	-1.07853	0.72205	No
ENSG00000052802	6307	MSMO1	methylsterol monooxygenase 1	1309.07	2922.75	2115.91	-2.2327	0.00163784	Yes	2135.99	4592.5	3364.24	-2.15006	2.07931e-05	Yes
ENSG00000052841	55761	TTC17	tetratricopeptide repeat domain 17	656.079	1421.96	1039.02	-2.16736	0.000168236	Yes	1303.03	2406.66	1854.84	-1.84698	9.79729e-09	No
ENSG00000052850	60529	ALX4	ALX homeobox 4	18.5641	45.8893	32.2267	-2.47194	0.126477	No	11.3503	71.4113	41.3808	-6.2916	0.000350695	Yes
ENSG00000053108	23105	FSTL4	follistatin like 4	916.574	36.83	476.702	24.8866	2.51536e-10	Yes	1011.68	48.3264	530.003	20.9343	3.29532e-10	Yes
ENSG00000053254	1112	FOXN3	forkhead box N3	1044.29	3095.36	2069.82	-2.96407	1.73064e-06	Yes	1153.65	3108.4	2131.03	-2.69441	8.5079e-09	Yes
ENSG00000053328	728464	METTL24	methyltransferase like 24	32.3569	11.996	22.1765	2.69729	0.00309887	Yes	17.7228	7.40527	12.564	2.39327	0.000660583	Yes
ENSG00000053371	8574	AKR7A2	aldo-keto reductase family 7 member A2	639.773	576.203	607.988	1.11032	0.651154	No	660.917	721.075	690.996	-1.09102	0.636103	No
ENSG00000053372	51154	MRTO4	MRT4 homolog, ribosome maturation factor	778.177	760.325	769.251	1.02348	0.895747	No	1159.95	786.125	973.035	1.47552	0.00048114	No
ENSG00000053438	4826	NNAT	neuronatin	1486.03	20347	10916.5	-13.6922	1.3228e-11	Yes	2453.99	16965.4	9709.7	-6.91341	2.25698e-09	Yes
ENSG00000053501	55850	USE1	unconventional SNARE in the ER 1	488.352	499.473	493.913	-1.02277	0.931206	No	807.955	541.734	674.845	1.49142	0.00831859	No
ENSG00000053524	23101	MCF2L2	MCF.2 cell line derived transforming sequence-like 2	1337.67	99.0468	718.358	13.5054	4.67621e-09	Yes	1338.31	136.978	737.642	9.77022	4.90981e-08	Yes
ENSG00000053702	83714	NRIP2	nuclear receptor interacting protein 2	258.739	49.6213	154.18	5.21428	7.95019e-07	Yes	203.044	20.6562	111.85	9.82967	4.48225e-08	Yes
ENSG00000053747	3909	LAMA3	laminin subunit alpha 3	127.1	22.1539	74.6269	5.73712	0.0132939	Yes	274.634	183.667	229.151	1.49528	0.321657	No
ENSG00000053770	55745	AP5M1	adaptor related protein complex 5 subunit mu 1	608.144	786.847	697.495	-1.29385	0.251408	No	910.558	914.295	912.426	-1.0041	0.972303	No
ENSG00000053900	29945	ANAPC4	anaphase promoting complex subunit 4	365.744	436.302	401.023	-1.19292	0.316562	No	945.946	1202.55	1074.25	-1.27127	0.0559752	No
ENSG00000053918	3784	KCNQ1	potassium voltage-gated channel subfamily Q member 1	27.1686	26.3229	26.7457	1.03213	0.931677	No	27.6643	18.2598	22.9621	1.51504	0.117298	No
ENSG00000054116	27095	TRAPPC3	trafficking protein particle complex 3	1128.35	1238.83	1183.59	-1.09791	0.55224	No	1685.57	1282.86	1484.22	1.31392	0.00249521	No
ENSG00000054118	9967	THRAP3	thyroid hormone receptor associated protein 3	2057.33	4660.3	3358.82	-2.26522	5.10004e-05	Yes	2993.57	4996.4	3994.98	-1.66904	1.49324e-08	No
ENSG00000054148	29085	PHPT1	phosphohistidine phosphatase 1	1080.23	1619.84	1350.03	-1.49953	0.102013	No	1583.99	1192.4	1388.2	1.3284	0.0687283	No
ENSG00000054179	954	ENTPD2	ectonucleoside triphosphate diphosphohydrolase 2	77.2049	14.6025	45.9037	5.2871	0.000657057	Yes	152.267	43.2504	97.7589	3.5206	0.000781814	Yes
ENSG00000054219	4065	LY75	lymphocyte antigen 75	13.3838	1.83938	7.61157	7.27624	0.000247418	Yes	21.1157	3.49659	12.3061	6.03894	1.56897e-05	Yes
ENSG00000054267	51742	ARID4B	AT-rich interaction domain 4B	779.278	1488.67	1133.97	-1.91032	0.000566361	No	1086.43	1905.63	1496.03	-1.75403	3.74318e-05	No
ENSG00000054277	23596	OPN3	opsin 3	425.649	186.69	306.17	2.27998	0.00065731	Yes	1016.57	243.932	630.251	4.16743	1.69426e-11	Yes
ENSG00000054282	10806	SDCCAG8	serologically defined colon cancer antigen 8	588.725	1393.2	990.962	-2.36647	0.000477108	Yes	546.822	521.591	534.206	1.04837	0.620956	No
ENSG00000054356	5798	PTPRN	protein tyrosine phosphatase receptor type N	9881.32	1025.4	5453.36	9.63659	3.34563e-07	Yes	10253	959.232	5606.12	10.6888	1.18606e-13	Yes
ENSG00000054392	55733	HHAT	hedgehog acyltransferase	106.62	43.4645	75.0422	2.45304	0.00708844	Yes	134.021	83.5113	108.766	1.60482	0.0313377	No
ENSG00000054523	23095	KIF1B	kinesin family member 1B	13836.8	16800.7	15318.8	-1.21421	0.414214	No	12134.1	17003.5	14568.8	-1.4013	0.0363173	No
ENSG00000054598	2296	FOXC1	forkhead box C1	168.227	154.59	161.409	1.08822	0.875204	No	183.763	230.526	207.145	-1.25447	0.477827	No
ENSG00000054611	25771	TBC1D22A	TBC1 domain family member 22A	653.952	389.795	521.873	1.67768	0.00104093	No	721.304	427.95	574.627	1.68549	2.18593e-06	No
ENSG00000054654	23224	SYNE2	spectrin repeat containing nuclear envelope protein 2	492.216	7025.21	3758.71	-14.2726	4.52125e-07	Yes	675.728	10486.6	5581.18	-15.519	3.81478e-11	Yes
ENSG00000054690	57475	PLEKHH1	pleckstrin homology, MyTH4 and FERM domain containing H1	2616.26	246.56	1431.41	10.611	8.39641e-06	Yes	3149.86	965.177	2057.52	3.2635	3.13429e-06	Yes
ENSG00000054793	10079	ATP9A	ATPase phospholipid transporting 9A (putative)	16586	15257.6	15921.8	1.08706	0.764812	No	13285.7	11030.8	12158.2	1.20443	0.340435	No
ENSG00000054803	140689	CBLN4	cerebellin 4 precursor	1137.55	472.898	805.223	2.40548	0.113941	No	1146	271.977	708.986	4.21358	0.000617805	Yes
ENSG00000054938	25884	CHRDL2	chordin like 2	8.51698	1.72106	5.11902	4.94867	0.0060896	Yes	10.1542	4.13841	7.14629	2.45364	0.0424889	Yes
ENSG00000054965	23201	FAM168A	family with sequence similarity 168 member A	6840.4	6846.4	6843.4	-1.00088	0.996225	No	7167.71	7684.82	7426.27	-1.07214	0.623934	No
ENSG00000054967	84957	RELT	RELT TNF receptor	132.091	91.4779	111.784	1.44396	0.192337	No	259.42	317.083	288.251	-1.22228	0.158106	No
ENSG00000054983	2581	GALC	galactosylceramidase	956.906	707.927	832.416	1.3517	0.0837429	No	1344.59	974.157	1159.37	1.38026	0.00443601	No
ENSG00000055044	51602	NOP58	NOP58 ribonucleoprotein	474.957	1014.74	744.847	-2.13648	0.000576506	Yes	1167.93	1815.48	1491.7	-1.55444	1.68288e-05	No
ENSG00000055070	26099	SZRD1	SUZ RNA binding domain containing 1	643.281	1293.45	968.363	-2.0107	0.000659517	Yes	1050.84	2073.95	1562.39	-1.97361	1.48089e-06	No
ENSG00000055118	3757	KCNH2	potassium voltage-gated channel subfamily H member 2	884.93	1024.11	954.518	-1.15727	0.618486	No	849.69	1210.08	1029.88	-1.42414	0.0918932	No
ENSG00000055130	8454	CUL1	cullin 1	2077.29	2896.81	2487.05	-1.39452	0.0144282	No	2844.64	3042.32	2943.48	-1.06949	0.273338	No
ENSG00000055147	10827	FAM114A2	family with sequence similarity 114 member A2	217.719	373.262	295.491	-1.71442	0.00919707	No	337.848	557.431	447.64	-1.64995	2.1551e-06	No
ENSG00000055163	26999	CYFIP2	cytoplasmic FMR1 interacting protein 2	15033.6	8545.48	11789.5	1.75924	0.0126631	No	12994.1	5923.94	9459.04	2.19349	5.09743e-07	Yes
ENSG00000055208	23118	TAB2	TGF-beta activated kinase 1 (MAP3K7) binding protein 2	1218.63	1629.08	1423.85	-1.33681	0.0834164	No	1385.64	2232.24	1808.94	-1.61098	5.23155e-05	No
ENSG00000055211	116254	GINM1	glycoprotein integral membrane 1	363.458	385.431	374.445	-1.06046	0.789916	No	660.594	577.185	618.889	1.14451	0.146193	No
ENSG00000055332	5610	EIF2AK2	eukaryotic translation initiation factor 2 alpha kinase 2	611.339	503.95	557.645	1.21309	0.254886	No	1774.37	1469.01	1621.69	1.20787	0.152256	No
ENSG00000055483	57602	USP36	ubiquitin specific peptidase 36	746.864	598.487	672.675	1.24792	0.34129	No	1104.67	1207.65	1156.16	-1.09322	0.192122	No
ENSG00000055609	58508	KMT2C	lysine methyltransferase 2C	1324.77	2731.88	2028.32	-2.06216	0.0821855	No	1888.57	4702.54	3295.55	-2.49	9.56995e-05	Yes
ENSG00000055732	55283	MCOLN3	mucolipin 3	2.35799	0.461627	1.40981	5.10799	0.000244305	Yes	9.9485	1.13962	5.54406	8.72967	7.4083e-08	Yes
ENSG00000055813	114800	CCDC85A	coiled-coil domain containing 85A	539.649	143.2	341.424	3.76851	0.00126987	Yes	254.09	86.4038	170.247	2.94072	0.0158172	Yes
ENSG00000055917	23369	PUM2	pumilio RNA binding family member 2	3522.44	6149.43	4835.94	-1.74579	0.00300653	No	3886.19	6878.53	5382.36	-1.76999	7.12959e-06	No
ENSG00000055950	84545	MRPL43	mitochondrial ribosomal protein L43	718.79	1040.99	879.889	-1.44825	0.0410988	No	995.939	1093.36	1044.65	-1.09782	0.507382	No
ENSG00000055955	3700	ITIH4	inter-alpha-trypsin inhibitor heavy chain 4	2.06566	1.55918	1.81242	1.32484	0.661754	No	20.8295	19.5754	20.2025	1.06406	0.771276	No
ENSG00000056050	54969	HPF1	histone PARylation factor 1	489.436	904.634	697.035	-1.84832	0.0239495	No	888.686	1169.6	1029.14	-1.3161	0.0119692	No
ENSG00000056097	51663	ZFR	zinc finger RNA binding protein	4403.01	5078.12	4740.57	-1.15333	0.45869	No	4194.02	4337.09	4265.56	-1.03411	0.7725	No
ENSG00000056277	55609	ZNF280C	zinc finger protein 280C	69.6806	244.502	157.091	-3.50889	1.88085e-05	Yes	102.438	470.48	286.459	-4.59281	7.18479e-11	Yes
ENSG00000056291	10886	NPFFR2	neuropeptide FF receptor 2	21.1705	0.907057	11.0388	23.3398	1.87611e-06	Yes	17.1089	2.10662	9.60775	8.12151	0.000207677	Yes
ENSG00000056487	112885	PHF21B	PHD finger protein 21B	57.2045	1191.08	624.141	-20.8214	2.5793e-09	Yes	137.625	2264.02	1200.82	-16.4506	5.72649e-10	Yes
ENSG00000056558	7185	TRAF1	TNF receptor associated factor 1	160.158	53.3228	106.741	3.00356	0.0153923	Yes	406.364	292.167	349.266	1.39086	0.0254338	No
ENSG00000056586	54542	RC3H2	ring finger and CCCH-type domains 2	1600.44	3712.83	2656.64	-2.31988	0.000747175	Yes	1623.39	3039.52	2331.45	-1.87233	9.7038e-05	No
ENSG00000056661	---	---	---	384.246	1695.97	1040.11	-4.41377	2.79852e-07	Yes	842.686	3644.35	2243.52	-4.32469	5.15153e-15	Yes
ENSG00000056736	55540	IL17RB	interleukin 17 receptor B	258.346	144.511	201.428	1.78772	0.0127552	No	487.76	46.8148	267.288	10.4189	3.80801e-10	Yes
ENSG00000056972	10758	TRAF3IP2	TRAF3 interacting protein 2	122.753	38.962	80.8574	3.15058	0.000176949	Yes	187.552	79.1033	133.328	2.37098	0.000155804	Yes
ENSG00000056998	8908	GYG2	glycogenin 2	234.667	246.915	240.791	-1.05219	0.887349	No	293.589	431.448	362.518	-1.46957	0.0525242	No
ENSG00000057019	131566	DCBLD2	discoidin, CUB and LCCL domain containing 2	409.509	687.923	548.716	-1.67987	0.0512351	No	469.559	1452.24	960.898	-3.09277	6.71013e-05	Yes
ENSG00000057252	6646	SOAT1	sterol O-acyltransferase 1	191.401	316.443	253.922	-1.65329	0.042325	No	240.78	547.397	394.089	-2.27343	4.19592e-05	Yes
ENSG00000057294	5318	PKP2	plakophilin 2	91.2995	100.192	95.7458	-1.0974	0.814556	No	145.553	143.079	144.316	1.01729	0.921248	No
ENSG00000057468	4438	MSH4	mutS homolog 4	7.18972	3.99455	5.59213	1.79988	0.146528	No	14.5435	16.0298	15.2867	-1.1022	0.695527	No
ENSG00000057593	2155	F7	coagulation factor VII	60.7486	33.8922	47.3204	1.79241	0.0913313	No	80.4463	19.8686	50.1574	4.04893	2.32541e-05	Yes
ENSG00000057608	2665	GDI2	GDP dissociation inhibitor 2	3138.5	9191	6164.75	-2.92847	5.04057e-05	Yes	3587.29	7057.05	5322.17	-1.96723	1.38409e-11	No
ENSG00000057657	639	PRDM1	PR/SET domain 1	34.3286	22.7659	28.5473	1.5079	0.215532	No	69.5987	34.0709	51.8348	2.04276	0.001463	Yes
ENSG00000057663	9474	ATG5	autophagy related 5	813.331	674.881	744.106	1.20515	0.375529	No	1106.35	718.928	912.637	1.53888	1.56897e-06	No
ENSG00000057704	57458	TMCC3	transmembrane and coiled-coil domain family 3	604.544	127.898	366.221	4.72677	0.000316278	Yes	405.552	186.904	296.228	2.16984	0.018382	Yes
ENSG00000057757	57095	PITHD1	PITH domain containing 1	3573.48	1922.92	2748.2	1.85836	0.000524131	No	5412.63	2092.08	3752.35	2.5872	2.04218e-11	Yes
ENSG00000057935	57504	MTA3	metastasis associated 1 family member 3	3004.14	1513.25	2258.7	1.98522	1.52337e-05	No	3346.11	1509.34	2427.72	2.21694	2.60316e-09	Yes
ENSG00000058056	8975	USP13	ubiquitin specific peptidase 13	363.439	709.271	536.355	-1.95155	0.000806448	No	418.448	889.473	653.961	-2.12565	2.16132e-08	Yes
ENSG00000058063	23200	ATP11B	ATPase phospholipid transporting 11B (putative)	459.519	736.058	597.788	-1.6018	0.0292053	No	683.494	1077.35	880.423	-1.57624	0.00133996	No
ENSG00000058085	3918	LAMC2	laminin subunit gamma 2	10.3126	74.4714	42.392	-7.22141	1.74682e-05	Yes	20.2632	64.2015	42.2323	-3.16838	0.0153118	Yes
ENSG00000058091	5218	CDK14	cyclin dependent kinase 14	4687.11	1261.51	2974.31	3.71547	6.0712e-08	Yes	4395.94	1537.87	2966.9	2.85846	2.83535e-05	Yes
ENSG00000058262	29927	SEC61A1	SEC61 translocon alpha 1 subunit	1592.49	4335.2	2963.84	-2.72228	2.37113e-07	Yes	2172.37	4778.16	3475.27	-2.19952	3.76556e-12	Yes
ENSG00000058272	4659	PPP1R12A	protein phosphatase 1 regulatory subunit 12A	1544.28	1585.53	1564.9	-1.02671	0.909279	No	2211.92	2173.31	2192.62	1.01777	0.911005	No
ENSG00000058335	5923	RASGRF1	Ras protein specific guanine nucleotide releasing factor 1	6701.13	340.546	3520.84	19.6776	5.63734e-06	Yes	7356.89	369.057	3862.97	19.9343	4.19332e-13	Yes
ENSG00000058404	816	CAMK2B	calcium/calmodulin dependent protein kinase II beta	11567.3	2271.13	6919.23	5.09321	0.000214654	Yes	12930.7	2212.99	7571.84	5.84309	3.50268e-09	Yes
ENSG00000058453	9696	CROCC	ciliary rootlet coiled-coil, rootletin	427.301	888.031	657.666	-2.07823	0.0122921	Yes	605.491	2119.13	1362.31	-3.49986	6.30786e-07	Yes
ENSG00000058600	55718	POLR3E	RNA polymerase III subunit E	605.421	858.758	732.09	-1.41845	0.036619	No	999.378	1313.93	1156.65	-1.31475	0.00111773	No
ENSG00000058668	493	ATP2B4	ATPase plasma membrane Ca2+ transporting 4	6507.11	1758.22	4132.66	3.70096	1.80018e-05	Yes	6830.21	3250.01	5040.11	2.1016	3.39381e-05	Yes
ENSG00000058673	9877	ZC3H11A	zinc finger CCCH-type containing 11A	1277.06	2041.94	1659.5	-1.59894	0.014832	No	2804.46	5369.86	4087.16	-1.91476	2.06862e-08	No
ENSG00000058729	55781	RIOK2	RIO kinase 2	224.692	452.329	338.511	-2.0131	0.00588093	Yes	378.786	583.289	481.037	-1.53989	2.98584e-05	No
ENSG00000058799	54432	YIPF1	Yip1 domain family member 1	670.064	490.808	580.436	1.36523	0.100201	No	798.471	594.573	696.522	1.34293	0.00542453	No
ENSG00000058804	55706	NDC1	NDC1 transmembrane nucleoporin	349.194	907.045	628.12	-2.59754	6.88468e-05	Yes	398.497	1054.95	726.725	-2.64733	1.94476e-10	Yes
ENSG00000058866	1608	DGKG	diacylglycerol kinase gamma	790.054	39.6603	414.857	19.9205	1.60824e-08	Yes	1073.52	45.9512	559.738	23.3623	5.49183e-14	Yes
ENSG00000059122	84256	FLYWCH1	FLYWCH-type zinc finger 1	1481.52	1200.84	1341.18	1.23374	0.281859	No	1771.05	1608.22	1689.63	1.10125	0.503363	No
ENSG00000059145	64718	UNKL	unk like zinc finger	573.28	554.493	563.887	1.03388	0.885512	No	552.699	811.201	681.95	-1.46771	0.000373233	No
ENSG00000059377	6916	TBXAS1	thromboxane A synthase 1	58.3204	22.7406	40.5305	2.5646	0.0130051	Yes	81.2747	37.6739	59.4743	2.15732	0.000116553	Yes
ENSG00000059378	64761	PARP12	poly(ADP-ribose) polymerase family member 12	119.575	30.1883	74.8814	3.96096	6.16468e-05	Yes	184.931	53.4846	119.208	3.45766	1.46058e-06	Yes
ENSG00000059573	5832	ALDH18A1	aldehyde dehydrogenase 18 family member A1	647.112	1872	1259.56	-2.89285	2.96785e-07	Yes	755.343	2039.69	1397.52	-2.70035	3.55967e-11	Yes
ENSG00000059588	6894	TARBP1	TAR (HIV-1) RNA binding protein 1	497.751	217.542	357.646	2.28807	0.0858326	No	3026.14	2819.86	2923	1.07315	0.704269	No
ENSG00000059691	5188	GATB	glutamyl-tRNA amidotransferase subunit B	1426.23	623.328	1024.78	2.28809	7.84308e-06	Yes	2062.57	616.486	1339.53	3.34569	6.17868e-14	Yes
ENSG00000059728	4084	MXD1	MAX dimerization protein 1	451.247	637.208	544.228	-1.41211	0.0803717	No	563.08	628.389	595.735	-1.11599	0.414571	No
ENSG00000059758	5128	CDK17	cyclin dependent kinase 17	2598.66	1879.59	2239.13	1.38257	0.191441	No	2737.8	1815.75	2276.77	1.50781	0.00593426	No
ENSG00000059769	548645	DNAJC25	DnaJ heat shock protein family (Hsp40) member C25	128.79	92.1663	110.478	1.39736	0.119594	No	273.123	243.645	258.384	1.12099	0.375602	No
ENSG00000059804	6515	SLC2A3	solute carrier family 2 member 3	2068.89	825.381	1447.13	2.50658	0.000952608	Yes	2685.88	1165.75	1925.82	2.30399	1.34927e-07	Yes
ENSG00000059915	5662	PSD	pleckstrin and Sec7 domain containing	12643.2	4649.3	8646.27	2.71938	0.00388752	Yes	11096.9	3928.64	7512.77	2.82462	1.01847e-05	Yes
ENSG00000060069	9150	CTDP1	CTD phosphatase subunit 1	341.58	662.05	501.815	-1.9382	0.000439642	No	318.066	603.002	460.534	-1.89584	4.07567e-05	No
ENSG00000060138	8531	YBX3	Y-box binding protein 3	180.172	388.854	284.513	-2.15824	0.0371332	Yes	303.237	531.303	417.27	-1.7521	0.014326	No
ENSG00000060140	55359	STYK1	serine/threonine/tyrosine kinase 1	451.005	16.5102	233.758	27.3168	2.5502e-08	Yes	538.949	27.2768	283.113	19.7585	1.47891e-07	Yes
ENSG00000060237	65125	WNK1	WNK lysine deficient protein kinase 1	7634.93	3396.39	5515.66	2.24796	0.00458313	Yes	5893.43	5389.09	5641.26	1.09359	0.602002	No
ENSG00000060339	55749	CCAR1	cell division cycle and apoptosis regulator 1	628.417	1283.16	955.788	-2.04189	0.000334556	Yes	1458.48	3218.69	2338.59	-2.20687	5.00147e-08	Yes
ENSG00000060491	11054	OGFR	opioid growth factor receptor	1110.75	1145.74	1128.24	-1.0315	0.874463	No	1964.74	1520.08	1742.41	1.29253	0.184221	No
ENSG00000060558	2769	GNA15	G protein subunit alpha 15	189.005	12.6598	100.833	14.9296	1.68984e-07	Yes	174.744	12.1672	93.4556	14.3619	1.44656e-10	Yes
ENSG00000060566	84699	CREB3L3	cAMP responsive element binding protein 3 like 3	36.4849	0.939785	18.7124	38.8226	8.03282e-09	Yes	40.7581	1.32345	21.0408	30.7968	2.57126e-11	Yes
ENSG00000060642	55650	PIGV	phosphatidylinositol glycan anchor biosynthesis class V	292.454	106.023	199.239	2.75839	2.9538e-05	Yes	315.998	168.725	242.361	1.87286	2.40593e-07	No
ENSG00000060656	10076	PTPRU	protein tyrosine phosphatase receptor type U	1095.03	1580.37	1337.7	-1.44322	0.406611	No	810.322	912.5	861.411	-1.1261	0.632374	No
ENSG00000060688	9410	SNRNP40	small nuclear ribonucleoprotein U5 subunit 40	413.089	1100.71	756.898	-2.66457	3.30414e-05	Yes	511.524	1275.71	893.619	-2.49395	2.98836e-10	Yes
ENSG00000060709	23504	RIMBP2	RIMS binding protein 2	2507.42	306.129	1406.77	8.19073	0.00117187	Yes	3279.79	718.711	1999.25	4.56343	0.000822557	Yes
ENSG00000060718	1301	COL11A1	collagen type XI alpha 1 chain	244.779	452.604	348.691	-1.84903	0.226559	No	769.528	1494.53	1132.03	-1.94214	0.0936119	No
ENSG00000060749	79832	QSER1	glutamine and serine rich 1	357.657	1899.74	1128.7	-5.31162	8.75016e-08	Yes	468.571	2535.33	1501.95	-5.41077	1.00356e-10	Yes
ENSG00000060762	51660	MPC1	mitochondrial pyruvate carrier 1	1349.89	627.609	988.75	2.15085	0.00197981	Yes	1936.32	776.872	1356.6	2.49246	2.64442e-09	Yes
ENSG00000060971	30	ACAA1	acetyl-CoA acyltransferase 1	880.759	497.246	689.003	1.77128	0.00176918	No	2154.51	1273.32	1713.92	1.69205	9.39286e-06	No
ENSG00000060982	586	BCAT1	branched chain amino acid transaminase 1	919.459	1524.2	1221.83	-1.65772	0.128299	No	1016.39	1315.39	1165.89	-1.29418	0.333426	No
ENSG00000061273	51564	HDAC7	histone deacetylase 7	409.784	469.319	439.552	-1.14528	0.669559	No	1044.65	1765.69	1405.17	-1.69022	0.00187599	No
ENSG00000061337	11178	LZTS1	leucine zipper tumor suppressor 1	2355.66	5069.95	3712.8	-2.15224	0.00619806	Yes	1917.39	3820.39	2868.89	-1.9925	0.0362636	No
ENSG00000061455	93166	PRDM6	PR/SET domain 6	15.4411	10.7803	13.1107	1.43235	0.573325	No	33.4025	54.1094	43.756	-1.61992	0.233507	No
ENSG00000061492	7478	WNT8A	Wnt family member 8A	5.8127	1.53988	3.67629	3.77479	0.0110945	Yes	18.1986	2.73064	10.4646	6.66457	2.55212e-06	Yes
ENSG00000061656	6676	SPAG4	sperm associated antigen 4	39.449	8.64328	24.0461	4.56413	0.000522522	Yes	98.6332	26.9299	62.7815	3.66259	2.28292e-06	Yes
ENSG00000061676	10787	NCKAP1	NCK associated protein 1	10853.7	8415.95	9634.8	1.28965	0.190775	No	9343.59	6196.3	7769.95	1.50793	0.0076412	No
ENSG00000061794	60488	MRPS35	mitochondrial ribosomal protein S35	997.92	1238.6	1118.26	-1.24119	0.257682	No	1242.93	1190.49	1216.71	1.04405	0.564115	No
ENSG00000061918	2983	GUCY1B1	guanylate cyclase 1 soluble subunit beta 1	5217.37	950.617	3084	5.48841	1.16615e-07	Yes	4756.97	1027.81	2892.39	4.62824	2.68101e-11	Yes
ENSG00000061936	6433	SFSWAP	splicing factor SWAP	664.783	806.088	735.436	-1.21256	0.530431	No	1685.67	2389.33	2037.5	-1.41744	0.00049219	No
ENSG00000061938	10188	TNK2	tyrosine kinase non receptor 2	5136.42	733.077	2934.75	7.00667	3.45183e-06	Yes	6225.4	2627.83	4426.61	2.36903	1.89968e-06	Yes
ENSG00000061987	23041	MON2	MON2 homolog, regulator of endosome-to-Golgi trafficking	1113.73	1004.94	1059.34	1.10826	0.621977	No	1558.16	1832.21	1695.18	-1.17588	0.226786	No
ENSG00000062038	1001	CDH3	cadherin 3	103.063	298.863	200.963	-2.89981	0.000579856	Yes	142.014	316.996	229.505	-2.23214	0.00196257	Yes
ENSG00000062096	416	ARSF	arylsulfatase F	55.0918	22.0931	38.5924	2.49362	0.0172776	Yes	77.7938	17.4828	47.6383	4.44973	3.13602e-05	Yes
ENSG00000062194	65056	GPBP1	GC-rich promoter binding protein 1	2173.59	3339.26	2756.43	-1.53629	0.0157976	No	3672.52	4568.38	4120.45	-1.24394	0.00296514	No
ENSG00000062282	84649	DGAT2	diacylglycerol O-acyltransferase 2	269.729	70.7618	170.246	3.8118	0.000145305	Yes	408.724	78.6219	243.673	5.1986	7.77975e-09	Yes
ENSG00000062370	7771	ZNF112	zinc finger protein 112	89.603	431.346	260.475	-4.81397	4.67682e-07	Yes	156.535	445.647	301.091	-2.84695	7.52885e-09	Yes
ENSG00000062485	1431	CS	citrate synthase	3788.47	4705.51	4246.99	-1.24206	0.137234	No	4971.24	5376.86	5174.05	-1.08159	0.170178	No
ENSG00000062524	4058	LTK	leukocyte receptor tyrosine kinase	94.2211	1.06921	47.6452	88.1224	3.35138e-08	Yes	217.771	7.1163	112.444	30.6017	2.98871e-11	Yes
ENSG00000062582	64951	MRPS24	mitochondrial ribosomal protein S24	5.83565	11.951	8.89333	-2.04793	0.165489	No	4.78716	2.30959	3.54838	2.07273	0.0157454	Yes
ENSG00000062598	63916	ELMO2	engulfment and cell motility 2	2621.6	2058.44	2340.02	1.27358	0.127132	No	2966.17	2738.17	2852.17	1.08327	0.356745	No
ENSG00000062650	23063	WAPL	WAPL cohesin release factor	676.707	1789.19	1232.95	-2.64397	1.55674e-05	Yes	748.212	1703.34	1225.77	-2.27655	2.03311e-07	Yes
ENSG00000062716	81671	VMP1	vacuole membrane protein 1	1470.34	1624.3	1547.32	-1.10471	0.659189	No	1790.17	1373.71	1581.94	1.30317	0.000974164	No
ENSG00000062725	10513	APPBP2	amyloid beta precursor protein binding protein 2	1601.86	1964.29	1783.08	-1.22626	0.376304	No	1727.88	2021.28	1874.58	-1.16981	0.131877	No
ENSG00000062822	5424	POLD1	DNA polymerase delta 1, catalytic subunit	102.098	481.833	291.966	-4.71934	0.000515616	Yes	89.6148	903.68	496.648	-10.0841	2.16919e-08	Yes
ENSG00000063015	124925	SEZ6	seizure related 6 homolog	1716.14	10845.1	6280.64	-6.3195	1.8365e-05	Yes	1789.66	8815.16	5302.41	-4.9256	7.12258e-07	Yes
ENSG00000063046	1975	EIF4B	eukaryotic translation initiation factor 4B	3447.87	12252.7	7850.26	-3.55369	2.22731e-06	Yes	4556.19	11441.3	7998.76	-2.51116	1.18651e-08	Yes
ENSG00000063127	28968	SLC6A16	solute carrier family 6 member 16	15.9973	6.95388	11.4756	2.30048	0.0349581	Yes	35.7633	64.3801	50.0717	-1.80017	0.0563009	No
ENSG00000063169	29998	BICRA	BRD4 interacting chromatin remodeling complex associated protein	435.393	1009.53	722.462	-2.31866	0.0251025	Yes	333.706	1114.21	723.956	-3.33889	2.96934e-09	Yes
ENSG00000063176	56848	SPHK2	sphingosine kinase 2	1067.94	513.479	790.708	2.07981	0.00102792	Yes	1048.41	717.007	882.71	1.46221	0.0346635	No
ENSG00000063177	6141	RPL18	ribosomal protein L18	4402.89	23666.5	14034.7	-5.37522	1.50736e-06	Yes	5612.53	14182.5	9897.51	-2.52693	2.45261e-06	Yes
ENSG00000063180	770	CA11	carbonic anhydrase 11	10539.6	447.539	5493.55	23.55	9.35094e-12	Yes	18175.1	749.106	9462.11	24.2624	1.61524e-18	Yes
ENSG00000063241	79763	ISOC2	isochorismatase domain containing 2	626.385	348.948	487.666	1.79507	0.00379534	No	693.993	302.633	498.313	2.29319	0.000156627	Yes
ENSG00000063244	11338	U2AF2	U2 small nuclear RNA auxiliary factor 2	2166.92	4905.13	3536.02	-2.26364	4.10999e-06	Yes	3069.58	5881.72	4475.65	-1.91613	1.06511e-08	No
ENSG00000063245	29924	EPN1	epsin 1	5184.47	4820.85	5002.66	1.07543	0.728634	No	4232.08	3553.39	3892.73	1.191	0.307067	No
ENSG00000063322	55588	MED29	mediator complex subunit 29	1580.52	775.107	1177.81	2.0391	4.71274e-05	Yes	2523.27	994.325	1758.8	2.53767	6.96507e-12	Yes
ENSG00000063438	---	---	---	91.622	30.8687	61.2453	2.96812	0.0110275	Yes	201.402	71.9298	136.666	2.79998	7.32038e-05	Yes
ENSG00000063515	2928	GSC2	goosecoid homeobox 2	0.743387	0.954751	0.849069	-1.28433	0.577469	No	0.499273	0.862098	0.680685	-1.72671	0.0290695	No
ENSG00000063587	10838	ZNF275	zinc finger protein 275	541.538	517.347	529.443	1.04676	0.803276	No	694.533	655.414	674.973	1.05969	0.643061	No
ENSG00000063601	8776	MTMR1	myotubularin related protein 1	779.797	1669.45	1224.62	-2.14087	8.53918e-05	Yes	1143.24	1471.74	1307.49	-1.28734	0.0048691	No
ENSG00000063660	2817	GPC1	glypican 1	3660.46	4911.97	4286.21	-1.3419	0.312101	No	4446.68	7303	5874.84	-1.64235	0.0132047	No
ENSG00000063761	57143	ADCK1	aarF domain containing kinase 1	386.31	170.729	278.519	2.26271	0.000143609	Yes	503.914	359.099	431.507	1.40327	0.00912249	No
ENSG00000063854	3029	HAGH	hydroxyacylglutathione hydrolase	2318.02	914.027	1616.02	2.53605	4.2658e-05	Yes	3617.53	935.831	2276.68	3.86558	6.38518e-13	Yes
ENSG00000063978	6047	RNF4	ring finger protein 4	1322.72	1618.77	1470.75	-1.22381	0.115062	No	1557.32	1775.54	1666.43	-1.14012	0.130698	No
ENSG00000064012	841	CASP8	caspase 8	36.398	14.6215	25.5098	2.48935	0.0499057	Yes	20.2381	12.1949	16.2165	1.65955	0.0713853	No
ENSG00000064042	22998	LIMCH1	LIM and calponin homology domains 1	4035.19	9955.45	6995.32	-2.46716	0.0274624	Yes	4712.4	5290.14	5001.27	-1.1226	0.776715	No
ENSG00000064102	55726	INTS13	integrator complex subunit 13	215.47	486.43	350.95	-2.25753	0.000657618	Yes	365.051	719.589	542.32	-1.9712	1.72647e-08	No
ENSG00000064115	51768	TM7SF3	transmembrane 7 superfamily member 3	1155.32	590.541	872.931	1.95638	0.000423018	No	1094.16	679.403	886.78	1.61047	6.41076e-06	No
ENSG00000064195	1747	DLX3	distal-less homeobox 3	3.76317	0.831022	2.29709	4.52836	0.00679114	Yes	6.77458	1.92013	4.34736	3.52818	0.00318379	Yes
ENSG00000064199	53340	SPA17	sperm autoantigenic protein 17	55.9762	17.8312	36.9037	3.13923	0.0450448	Yes	351.68	178.903	265.292	1.96575	0.0126918	No
ENSG00000064201	10077	TSPAN32	tetraspanin 32	14.6534	18.2683	16.4608	-1.2467	0.628298	No	3.59837	8.28163	5.94	-2.30149	0.101688	No
ENSG00000064205	8839	CCN5	cellular communication network factor 5	14.3072	0.803276	7.55525	17.8111	8.57307e-07	Yes	21.2888	0.867907	11.0783	24.5288	4.59914e-11	Yes
ENSG00000064218	58524	DMRT3	doublesex and mab-3 related transcription factor 3	8.6961	2.41711	5.5566	3.59772	0.213269	No	17.0165	36.3812	26.6988	-2.138	0.435024	No
ENSG00000064225	10402	ST3GAL6	ST3 beta-galactoside alpha-2,3-sialyltransferase 6	344.911	152.693	248.802	2.25886	0.00630747	Yes	512.566	284.997	398.781	1.7985	0.0026431	No
ENSG00000064270	9914	ATP2C2	ATPase secretory pathway Ca2+ transporting 2	94.7882	83.9262	89.3572	1.12942	0.863242	No	187.736	68.7666	128.251	2.73004	0.0464791	Yes
ENSG00000064300	4804	NGFR	nerve growth factor receptor	35.5243	348.198	191.861	-9.80167	2.13326e-06	Yes	54.1804	418.695	236.438	-7.72779	0.000102423	Yes
ENSG00000064309	50937	CDON	cell adhesion associated, oncogene regulated	141.924	1310.63	726.275	-9.23471	7.84215e-05	Yes	273.231	3578.89	1926.06	-13.0984	3.44127e-09	Yes
ENSG00000064313	6873	TAF2	TATA-box binding protein associated factor 2	403.744	1159.95	781.845	-2.87297	9.04414e-06	Yes	460.653	1274.09	867.37	-2.76583	6.24119e-09	Yes
ENSG00000064393	28996	HIPK2	homeodomain interacting protein kinase 2	8809.75	2259.67	5534.71	3.89869	1.12517e-05	Yes	4523.53	3335.43	3929.48	1.3562	0.278037	No
ENSG00000064419	23534	TNPO3	transportin 3	1105.57	2845.66	1975.62	-2.57393	8.08656e-06	Yes	1159.73	2269.82	1714.78	-1.9572	3.14402e-06	No
ENSG00000064490	8625	RFXANK	regulatory factor X associated ankyrin containing protein	212.099	279.646	245.873	-1.31847	0.331642	No	430.195	578.311	504.253	-1.3443	0.217749	No
ENSG00000064545	54929	TMEM161A	transmembrane protein 161A	344.438	274.563	309.501	1.25449	0.297475	No	307.234	422.187	364.711	-1.37416	0.0681056	No
ENSG00000064547	9170	LPAR2	lysophosphatidic acid receptor 2	48.1542	1114.56	581.358	-23.1457	8.04537e-10	Yes	127.944	3481.23	1804.59	-27.209	5.09386e-14	Yes
ENSG00000064601	5476	CTSA	cathepsin A	1422.39	296.464	859.425	4.79784	3.09029e-08	Yes	2746.86	893.234	1820.04	3.07518	2.04172e-12	Yes
ENSG00000064607	10147	SUGP2	SURP and G-patch domain containing 2	2906.09	3872.26	3389.18	-1.33246	0.108357	No	7669.72	9062.33	8366.03	-1.18157	0.0270859	No
ENSG00000064651	6558	SLC12A2	solute carrier family 12 member 2	1583.88	475.854	1029.87	3.3285	8.41992e-05	Yes	1238.84	716.395	977.616	1.72927	0.00562037	No
ENSG00000064652	28966	SNX24	sorting nexin 24	263.77	136.034	199.902	1.93899	0.00373158	No	524.994	296.507	410.75	1.7706	9.23471e-05	No
ENSG00000064655	2139	EYA2	EYA transcriptional coactivator and phosphatase 2	89.9184	27.2309	58.5746	3.30207	0.0788595	No	160.456	153.01	156.733	1.04866	0.949046	No
ENSG00000064666	1265	CNN2	calponin 2	63.8296	148.806	106.318	-2.3313	0.0104884	Yes	86.2975	670.921	378.609	-7.77451	5.15026e-08	Yes
ENSG00000064687	10347	ABCA7	ATP binding cassette subfamily A member 7	325.323	91.7537	208.538	3.54561	0.00116502	Yes	497.483	534.866	516.175	-1.07514	0.72013	No
ENSG00000064692	9627	SNCAIP	synuclein alpha interacting protein	95.2057	764.658	429.932	-8.03164	4.1522e-07	Yes	171.878	1770.4	971.138	-10.3003	3.38932e-13	Yes
ENSG00000064703	11218	DDX20	DEAD-box helicase 20	226.226	671.236	448.731	-2.96711	3.22536e-06	Yes	355.764	809.97	582.867	-2.2767	1.31788e-11	Yes
ENSG00000064726	53339	BTBD1	BTB domain containing 1	3222.09	2413.11	2817.6	1.33525	0.184487	No	3991	2288.34	3139.67	1.74406	1.70889e-05	No
ENSG00000064763	55711	FAR2	fatty acyl-CoA reductase 2	743.333	563.039	653.186	1.32022	0.271729	No	808.379	439.226	623.803	1.84046	0.00629641	No
ENSG00000064787	8537	BCAS1	breast carcinoma amplified sequence 1	5010.42	39.1463	2524.78	127.992	1.06333e-07	Yes	4414.03	26.5252	2220.28	166.409	9.31436e-11	Yes
ENSG00000064886	1117	CHI3L2	chitinase 3 like 2	9.7182	0.50651	5.11235	19.1866	3.09072e-08	Yes	6.96274	0.968767	3.96575	7.18721	9.27495e-07	Yes
ENSG00000064932	22904	SBNO2	strawberry notch homolog 2	255.009	456.074	355.542	-1.78846	0.0494516	No	236.673	583.616	410.145	-2.46591	3.05429e-05	Yes
ENSG00000064933	5378	PMS1	PMS1 homolog 1, mismatch repair system component	253.16	496.24	374.7	-1.96018	0.0051587	No	547.525	932.69	740.108	-1.70347	3.0232e-05	No
ENSG00000064961	10362	HMG20B	high mobility group 20B	258.22	371.995	315.108	-1.44061	0.244875	No	336.824	784.046	560.435	-2.32776	0.00995334	Yes
ENSG00000064989	10203	CALCRL	calcitonin receptor like receptor	166.512	60.6804	113.596	2.74409	0.0303929	Yes	187.684	98.9783	143.331	1.89621	0.0038358	No
ENSG00000064995	6882	TAF11	TATA-box binding protein associated factor 11	310.118	557.431	433.774	-1.79748	0.00215564	No	923.862	1245.35	1084.61	-1.34798	0.000257988	No
ENSG00000064999	23294	ANKS1A	ankyrin repeat and sterile alpha motif domain containing 1A	946.057	1651.92	1298.99	-1.74611	0.0077675	No	1392.09	2395.09	1893.59	-1.72049	0.000659899	No
ENSG00000065000	8943	AP3D1	adaptor related protein complex 3 subunit delta 1	4430.13	4232.31	4331.22	1.04674	0.84158	No	4498.78	4530.83	4514.8	-1.00712	0.935751	No
ENSG00000065029	7629	ZNF76	zinc finger protein 76	594.872	483.089	538.981	1.23139	0.349947	No	1008.92	1144.15	1076.53	-1.13404	0.285924	No
ENSG00000065054	9351	SLC9A3R2	SLC9A3 regulator 2	1244.59	348.288	796.438	3.57344	2.07908e-05	Yes	1267.83	307.852	787.84	4.1183	8.2436e-08	Yes
ENSG00000065057	4913	NTHL1	nth like DNA glycosylase 1	310.077	416.935	363.506	-1.34462	0.212423	No	406.971	404.991	405.981	1.00489	0.982985	No
ENSG00000065060	54887	UHRF1BP1	UHRF1 binding protein 1	458.936	498.672	478.804	-1.08658	0.741935	No	516.631	775.37	646	-1.50082	0.00104123	No
ENSG00000065135	2773	GNAI3	G protein subunit alpha i3	437.506	3519.47	1978.49	-8.0444	1.11222e-08	Yes	634.942	2962.03	1798.49	-4.66504	1.80437e-15	Yes
ENSG00000065150	3843	IPO5	importin 5	4884.27	9189.62	7036.94	-1.88147	0.00221203	No	4968.64	6818.18	5893.41	-1.37224	0.000893223	No
ENSG00000065154	4942	OAT	ornithine aminotransferase	4770.59	1120.19	2945.39	4.25872	1.27618e-06	Yes	5573.93	1235.93	3404.93	4.50992	1.70726e-10	Yes
ENSG00000065183	10885	WDR3	WD repeat domain 3	416.146	1344.4	880.272	-3.23059	3.86727e-06	Yes	581.774	1325.84	953.808	-2.27896	4.39976e-08	Yes
ENSG00000065243	5586	PKN2	protein kinase N2	351.866	766.018	558.942	-2.17701	0.00346238	Yes	575.555	1603.75	1089.65	-2.78644	8.8587e-08	Yes
ENSG00000065268	57418	WDR18	WD repeat domain 18	554.434	1157.84	856.135	-2.08832	0.00136738	Yes	440.062	923.069	681.566	-2.09759	0.00185094	Yes
ENSG00000065308	9697	TRAM2	translocation associated membrane protein 2	188.609	127.802	158.206	1.47578	0.173616	No	303.102	286.583	294.842	1.05764	0.763149	No
ENSG00000065320	9423	NTN1	netrin 1	167.765	372.39	270.077	-2.21971	0.026347	Yes	174.75	515.6	345.175	-2.9505	0.058865	No
ENSG00000065325	9340	GLP2R	glucagon like peptide 2 receptor	93.7824	0.529433	47.1559	177.137	2.72523e-12	Yes	165.086	0.711714	82.899	231.956	7.11729e-17	Yes
ENSG00000065328	55388	MCM10	minichromosome maintenance 10 replication initiation factor	3.17017	77.1691	40.1696	-24.3422	5.95645e-05	Yes	2.22946	352.416	177.322	-158.072	1.72473e-08	Yes
ENSG00000065357	1606	DGKA	diacylglycerol kinase alpha	538.219	54.0963	296.157	9.94927	1.53632e-06	Yes	1161.63	174.357	667.993	6.66235	4.08858e-13	Yes
ENSG00000065361	2065	ERBB3	erb-b2 receptor tyrosine kinase 3	1068.48	31.729	550.105	33.6752	2.3064e-08	Yes	1064.77	40.1998	552.483	26.4868	2.94895e-12	Yes
ENSG00000065371	54763	ROPN1	rhophilin associated tail protein 1	6.80866	1.33572	4.07219	5.09736	0.000293507	Yes	4.77118	0.822707	2.79694	5.79936	0.000279581	Yes
ENSG00000065413	91526	ANKRD44	ankyrin repeat domain 44	105.492	726.449	415.971	-6.88627	2.76275e-05	Yes	91.0918	421.359	256.225	-4.62565	0.000242728	Yes
ENSG00000065427	3735	KARS	lysyl-tRNA synthetase	1563.92	3967.36	2765.64	-2.5368	1.44248e-05	Yes	2175.54	3774.07	2974.8	-1.73478	1.90289e-09	No
ENSG00000065457	23536	ADAT1	adenosine deaminase tRNA specific 1	202.815	219.395	211.105	-1.08175	0.718868	No	313.989	333.689	323.839	-1.06274	0.662107	No
ENSG00000065485	10954	PDIA5	protein disulfide isomerase family A member 5	39.5783	49.1986	44.3885	-1.24307	0.547098	No	83.3445	149.446	116.395	-1.79311	0.0314354	No
ENSG00000065491	55633	TBC1D22B	TBC1 domain family member 22B	597.873	688.61	643.241	-1.15177	0.289065	No	649.19	679.913	664.552	-1.04733	0.696607	No
ENSG00000065518	4710	NDUFB4	NADH:ubiquinone oxidoreductase subunit B4	1469.08	1641.65	1555.37	-1.11747	0.666988	No	2817.93	1643.57	2230.75	1.71452	1.21884e-05	No
ENSG00000065526	23013	SPEN	spen family transcriptional repressor	1973.25	3699.26	2836.26	-1.8747	0.137609	No	2203.14	6162.51	4182.83	-2.79715	5.30272e-07	Yes
ENSG00000065534	4638	MYLK	myosin light chain kinase	1506.1	250.61	878.357	6.00975	1.64679e-05	Yes	1399.8	200.459	800.13	6.98296	1.06689e-10	Yes
ENSG00000065548	55854	ZC3H15	zinc finger CCCH-type containing 15	1643.3	1769.68	1706.49	-1.0769	0.742738	No	3055.48	2375.41	2715.45	1.2863	0.00263378	No
ENSG00000065559	6416	MAP2K4	mitogen-activated protein kinase kinase 4	4491.25	1389.11	2940.18	3.23318	6.47709e-07	Yes	5229.25	1598.56	3413.91	3.27122	9.24992e-12	Yes
ENSG00000065600	55248	TMEM206	transmembrane protein 206	567.496	1018.22	792.86	-1.79424	0.00253999	No	522.057	883.761	702.909	-1.69284	0.00178776	No
ENSG00000065609	9892	SNAP91	synaptosome associated protein 91	11466.4	4642.89	8054.67	2.46968	0.00256987	Yes	9526.4	3912.12	6719.26	2.4351	2.13509e-06	Yes
ENSG00000065613	9748	SLK	STE20 like kinase	1593.84	1576.67	1585.25	1.01089	0.959586	No	1896.67	1762.04	1829.35	1.07641	0.595543	No
ENSG00000065615	51167	CYB5R4	cytochrome b5 reductase 4	189.355	453.76	321.557	-2.39635	0.000863545	Yes	244.963	488.181	366.572	-1.99288	5.91316e-06	No
ENSG00000065618	1308	COL17A1	collagen type XVII alpha 1 chain	20.1033	0.932742	10.518	21.5529	1.60002e-06	Yes	31.786	1.62114	16.7036	19.6072	2.59707e-11	Yes
ENSG00000065621	119391	GSTO2	glutathione S-transferase omega 2	194.606	85.8478	140.227	2.26687	0.0114893	Yes	499.763	215.667	357.715	2.31729	2.57685e-06	Yes
ENSG00000065665	55176	SEC61A2	SEC61 translocon alpha 2 subunit	1476.09	1212.22	1344.16	1.21768	0.266563	No	1985.05	1559.54	1772.3	1.27284	0.0165196	No
ENSG00000065675	5588	PRKCQ	protein kinase C theta	345.712	35.3678	190.54	9.77475	2.24366e-07	Yes	320.154	48.8445	184.499	6.55455	7.09896e-07	Yes
ENSG00000065717	7089	TLE2	TLE family member 2, transcriptional corepressor	526.958	459.334	493.146	1.14722	0.561163	No	849.801	879.629	864.715	-1.0351	0.887202	No
ENSG00000065802	51665	ASB1	ankyrin repeat and SOCS box containing 1	1660.62	703.207	1181.91	2.36149	0.000144631	Yes	1555.31	1067.77	1311.54	1.45659	2.48559e-05	No
ENSG00000065809	83641	FAM107B	family with sequence similarity 107 member B	1637.79	3334.21	2486	-2.0358	0.00354657	Yes	1085.71	3012.92	2049.31	-2.77508	2.99505e-05	Yes
ENSG00000065833	4199	ME1	malic enzyme 1	959.707	51.8002	505.754	18.5271	2.03448e-09	Yes	1232.93	55.6643	644.297	22.1494	6.22126e-13	Yes
ENSG00000065882	23216	TBC1D1	TBC1 domain family member 1	885.067	1689.78	1287.42	-1.90921	0.00380619	No	1205.78	2425.91	1815.84	-2.01189	0.00195896	Yes
ENSG00000065883	8621	CDK13	cyclin dependent kinase 13	809.244	1391.42	1100.33	-1.7194	0.00371043	No	1158.08	2015.45	1586.76	-1.74035	1.02917e-07	No
ENSG00000065911	10797	MTHFD2	methylenetetrahydrofolate dehydrogenase (NADP+ dependent) 2, methenyltetrahydrofolate cyclohydrolase	59.9332	398.8	229.367	-6.65408	1.74926e-06	Yes	129.727	583.683	356.705	-4.49933	3.79443e-11	Yes
ENSG00000065923	84679	SLC9A7	solute carrier family 9 member A7	367.174	240.103	303.639	1.52923	0.314172	No	193.635	131.739	162.687	1.46983	0.342558	No
ENSG00000065970	55810	FOXJ2	forkhead box J2	759.163	1242.7	1000.93	-1.63694	0.018068	No	712.201	1216.81	964.505	-1.70852	0.00022296	No
ENSG00000065978	4904	YBX1	Y-box binding protein 1	1416.68	37353.7	19385.2	-26.367	5.99679e-12	Yes	2414.55	29737.2	16075.9	-12.3158	1.59791e-22	Yes
ENSG00000065989	5141	PDE4A	phosphodiesterase 4A	2095.15	478.319	1286.73	4.38024	1.06844e-05	Yes	2219.05	612.919	1415.99	3.62047	6.93356e-10	Yes
ENSG00000066027	5525	PPP2R5A	protein phosphatase 2 regulatory subunit B'alpha	1051.01	637.898	844.452	1.64761	0.0506516	No	1234.59	535.645	885.117	2.30486	2.47575e-06	Yes
ENSG00000066032	1496	CTNNA2	catenin alpha 2	4723.46	3515.19	4119.32	1.34373	0.211381	No	7072.93	4095.94	5584.43	1.72682	8.276e-06	No
ENSG00000066044	1994	ELAVL1	ELAV like RNA binding protein 1	1456.54	3059.63	2258.09	-2.10061	0.000134247	Yes	1821.22	4007.7	2914.46	-2.20056	7.92873e-12	Yes
ENSG00000066056	7075	TIE1	tyrosine kinase with immunoglobulin like and EGF like domains 1	414.799	322.756	368.778	1.28518	0.249932	No	423.957	340.353	382.155	1.24564	0.26062	No
ENSG00000066084	57609	DIP2B	disco interacting protein 2 homolog B	2058.56	2578.48	2318.52	-1.25256	0.387902	No	1630.28	2681.99	2156.13	-1.64511	0.00500253	No
ENSG00000066117	6602	SMARCD1	SWI/SNF related, matrix associated, actin dependent regulator of chromatin, subfamily d, member 1	1101.38	3651.31	2376.35	-3.31521	7.98125e-08	Yes	1497.09	4938.37	3217.73	-3.29865	9.75307e-16	Yes
ENSG00000066135	9682	KDM4A	lysine demethylase 4A	846.795	2825.67	1836.23	-3.3369	2.9292e-07	Yes	1354.47	3110.05	2232.26	-2.29614	1.6774e-10	Yes
ENSG00000066136	4802	NFYC	nuclear transcription factor Y subunit gamma	1054.29	1610.39	1332.34	-1.52747	0.00148775	No	1310.74	1909.74	1610.24	-1.45699	7.54992e-05	No
ENSG00000066185	84217	ZMYND12	zinc finger MYND-type containing 12	75.7373	2.42986	39.0836	31.1693	7.68623e-09	Yes	106.204	9.16894	57.6866	11.583	2.98211e-11	Yes
ENSG00000066230	6550	SLC9A3	solute carrier family 9 member A3	39.0187	53.3703	46.1945	-1.36781	0.464367	No	4.51645	2.25336	3.38491	2.00432	0.108211	No
ENSG00000066248	25791	NGEF	neuronal guanine nucleotide exchange factor	10260	1280.06	5770.03	8.01527	1.94761e-05	Yes	9348.07	984.04	5166.05	9.49968	3.29622e-08	Yes
ENSG00000066279	259266	ASPM	abnormal spindle microtubule assembly	12.4439	221.282	116.863	-17.7824	0.000172287	Yes	8.89004	893.837	451.364	-100.544	1.8356e-06	Yes
ENSG00000066294	8832	CD84	CD84 molecule	23.898	10.1327	17.0153	2.35851	0.114972	No	28.2847	12.9792	20.6319	2.17923	0.088143	No
ENSG00000066322	64834	ELOVL1	ELOVL fatty acid elongase 1	1650.36	156.021	903.193	10.5778	4.19942e-08	Yes	1121.39	328.39	724.889	3.4148	7.70085e-07	Yes
ENSG00000066336	6688	SPI1	Spi-1 proto-oncogene	77.5432	30.2754	53.9093	2.56127	0.0030282	Yes	84.3972	29.8212	57.1092	2.83011	9.56995e-05	Yes
ENSG00000066379	30834	ZNRD1	zinc ribbon domain containing 1	68.8955	201.771	135.333	-2.92866	3.55679e-05	Yes	201.348	442.559	321.953	-2.19798	1.10078e-05	Yes
ENSG00000066382	744	MPPED2	metallophosphoesterase domain containing 2	524.924	2260.93	1392.93	-4.30717	4.34922e-06	Yes	694.524	3067.87	1881.2	-4.41723	1.50774e-07	Yes
ENSG00000066422	27107	ZBTB11	zinc finger and BTB domain containing 11	1008.97	1234.65	1121.81	-1.22367	0.396851	No	1085.82	1261.63	1173.72	-1.16191	0.316449	No
ENSG00000066427	4287	ATXN3	ataxin 3	320.725	278.036	299.38	1.15354	0.510812	No	299.657	417.859	358.758	-1.39446	0.0411173	No
ENSG00000066455	9950	GOLGA5	golgin A5	664.054	959.337	811.695	-1.44467	0.0201106	No	989.926	949.563	969.744	1.04251	0.630025	No
ENSG00000066468	2263	FGFR2	fibroblast growth factor receptor 2	2010.25	409.029	1209.64	4.91468	0.00462437	Yes	2066.94	1507.55	1787.25	1.37106	0.363335	No
ENSG00000066557	55631	LRRC40	leucine rich repeat containing 40	526.632	1298.83	912.733	-2.4663	0.00141188	Yes	684.998	1363.08	1024.04	-1.9899	2.55556e-06	No
ENSG00000066583	51015	ISOC1	isochorismatase domain containing 1	329.818	554.947	442.382	-1.68259	0.0059582	No	440.719	574.682	507.7	-1.30396	0.0804683	No
ENSG00000066629	2009	EML1	EMAP like 1	880.141	5799.95	3340.05	-6.5898	1.89817e-07	Yes	896.856	3810.32	2353.59	-4.24854	2.18255e-05	Yes
ENSG00000066651	60487	TRMT11	tRNA methyltransferase 11 homolog	237.395	169.422	203.408	1.4012	0.275473	No	448.869	426.266	437.567	1.05303	0.762505	No
ENSG00000066654	55623	THUMPD1	THUMP domain containing 1	412.115	657.77	534.942	-1.59608	0.00860364	No	696.781	792.773	744.777	-1.13777	0.147504	No
ENSG00000066697	91283	MSANTD3	Myb/SANT DNA binding domain containing 3	312.537	796.58	554.558	-2.54875	4.18196e-06	Yes	390.217	687.164	538.69	-1.76098	3.50137e-07	No
ENSG00000066735	26153	KIF26A	kinesin family member 26A	113.361	2322.3	1217.83	-20.4858	4.51928e-08	Yes	77.9586	2180.66	1129.31	-27.972	2.05531e-09	Yes
ENSG00000066739	55102	ATG2B	autophagy related 2B	1626.34	1101.34	1363.84	1.4767	0.101203	No	2081.96	1580.05	1831	1.31765	0.0188021	No
ENSG00000066777	10565	ARFGEF1	ADP ribosylation factor guanine nucleotide exchange factor 1	1267.59	2064.5	1666.04	-1.62868	0.0227698	No	1426.33	2019.98	1723.15	-1.4162	0.011492	No
ENSG00000066827	57623	ZFAT	zinc finger and AT-hook domain containing	170.238	322.543	246.39	-1.89466	0.00115101	No	218.629	304.863	261.746	-1.39443	0.011907	No
ENSG00000066855	9650	MTFR1	mitochondrial fission regulator 1	135.77	303.868	219.819	-2.2381	0.000912366	Yes	142.38	420.503	281.442	-2.95338	1.49e-09	Yes
ENSG00000066923	10734	STAG3	stromal antigen 3	296.479	405.336	350.907	-1.36717	0.293069	No	47.5851	72.1668	59.876	-1.51658	0.0274919	No
ENSG00000066926	2235	FECH	ferrochelatase	758.757	318.298	538.528	2.3838	5.91459e-06	Yes	720.324	390.177	555.251	1.84615	4.06919e-07	No
ENSG00000066933	4649	MYO9A	myosin IXA	1400.02	1647.84	1523.93	-1.17701	0.613833	No	1909.12	1907.82	1908.47	1.00068	0.997432	No
ENSG00000067048	8653	DDX3Y	DEAD-box helicase 3 Y-linked	13.3692	60.9376	37.1534	-4.55807	0.453882	No	1638.91	164.901	901.908	9.93875	0.0211441	Yes
ENSG00000067057	5214	PFKP	phosphofructokinase, platelet	6551.33	1671.28	4111.3	3.91995	1.11859e-05	Yes	7431.89	1486.25	4459.07	5.00043	2.70259e-10	Yes
ENSG00000067064	3422	IDI1	isopentenyl-diphosphate delta isomerase 1	1600.38	1791.67	1696.02	-1.11953	0.697964	No	3780.92	3807.59	3794.26	-1.00705	0.961496	No
ENSG00000067066	6672	SP100	SP100 nuclear antigen	98.1387	36.2758	67.2073	2.70535	0.0022026	Yes	141.147	41.0291	91.0882	3.44018	1.9287e-06	Yes
ENSG00000067082	1316	KLF6	Kruppel like factor 6	832.415	2570.6	1701.51	-3.08812	7.82719e-05	Yes	982.169	3027.59	2004.88	-3.08256	2.41752e-08	Yes
ENSG00000067113	8611	PLPP1	phospholipid phosphatase 1	612.32	141.481	376.9	4.32795	1.09202e-08	Yes	1153.79	256.434	705.113	4.49938	1.5076e-15	Yes
ENSG00000067141	4756	NEO1	neogenin 1	2135.16	6639.83	4387.5	-3.10975	0.00159069	Yes	2190.96	6985.7	4588.33	-3.18842	1.88466e-06	Yes
ENSG00000067167	23471	TRAM1	translocation associated membrane protein 1	469.706	647.191	558.449	-1.37786	0.238167	No	824.013	1038.66	931.337	-1.26049	0.0935326	No
ENSG00000067177	5255	PHKA1	phosphorylase kinase regulatory subunit alpha 1	145.615	58.5487	102.082	2.48708	0.0837258	No	274.896	175.646	225.271	1.56505	0.0884314	No
ENSG00000067182	7132	TNFRSF1A	TNF receptor superfamily member 1A	319.497	185.576	252.536	1.72166	0.0696144	No	380.675	277.008	328.841	1.37424	0.10227	No
ENSG00000067191	782	CACNB1	calcium voltage-gated channel auxiliary subunit beta 1	4230.04	1569.56	2899.8	2.69505	0.000176325	Yes	4553.71	2391.52	3472.62	1.90411	7.23359e-08	No
ENSG00000067208	7813	EVI5	ecotropic viral integration site 5	341.998	189.5	265.749	1.80474	0.00981982	No	516.285	397.773	457.029	1.29794	0.0306452	No
ENSG00000067221	9399	STOML1	stomatin like 1	1858.35	1115.42	1486.89	1.66605	0.0360272	No	1896.21	787.181	1341.7	2.40887	1.12303e-05	Yes
ENSG00000067225	5315	PKM	pyruvate kinase M1/2	33543.8	12382.4	22963.1	2.70898	8.62005e-06	Yes	35344	13930.2	24637.1	2.53723	1.05189e-09	Yes
ENSG00000067248	54505	DHX29	DExH-box helicase 29	535.366	1318.19	926.779	-2.46223	5.45311e-05	Yes	867.087	1409.75	1138.42	-1.62584	4.57864e-06	No
ENSG00000067334	30836	DNTTIP2	deoxynucleotidyltransferase terminal interacting protein 2	692.013	1435.43	1063.72	-2.07428	0.0012199	Yes	1221.4	1543.62	1382.51	-1.26381	0.00202723	No
ENSG00000067365	79091	METTL22	methyltransferase like 22	201.089	201.162	201.125	-1.00036	0.998727	No	341.162	506.178	423.67	-1.48369	0.00093086	No
ENSG00000067369	7158	TP53BP1	tumor protein p53 binding protein 1	2326.86	3932.66	3129.76	-1.69012	0.0167241	No	2089.61	4173.66	3131.64	-1.99734	9.86675e-06	No
ENSG00000067445	7216	TRO	trophinin	1923.84	3078.04	2500.94	-1.59995	0.0180014	No	2807.74	4908.4	3858.07	-1.74816	6.50278e-07	No
ENSG00000067533	51018	RRP15	ribosomal RNA processing 15 homolog	183.641	414.407	299.024	-2.25662	0.00160907	Yes	327.112	532.889	430	-1.62907	1.09844e-05	No
ENSG00000067560	387	RHOA	ras homolog family member A	6325.8	5596.55	5961.18	1.1303	0.52869	No	6290.89	5890.26	6090.58	1.06802	0.433371	No
ENSG00000067596	1659	DHX8	DEAH-box helicase 8	833.01	1523.97	1178.49	-1.82947	0.000822075	No	904.948	1534.69	1219.82	-1.69589	5.21614e-06	No
ENSG00000067601	5382	PMS2P4	PMS1 homolog 2, mismatch repair system component pseudogene 4	34.0016	19.6793	26.8404	1.72778	0.0665316	No	71.0335	31.1811	51.1073	2.27809	3.5089e-05	Yes
ENSG00000067606	5590	PRKCZ	protein kinase C zeta	3922.73	1620.86	2771.79	2.42016	0.000406477	Yes	7455.34	1910.46	4682.9	3.90238	6.18127e-11	Yes
ENSG00000067646	7544	ZFY	zinc finger protein Y-linked	4.56186	22.8436	13.7027	-5.00753	0.361558	No	201.722	46.8941	124.308	4.30164	0.0905638	No
ENSG00000067704	55699	IARS2	isoleucyl-tRNA synthetase 2, mitochondrial	1977.6	1482.79	1730.19	1.3337	0.0313816	No	1886.61	1871.11	1878.86	1.00829	0.924913	No
ENSG00000067715	6857	SYT1	synaptotagmin 1	40307.4	10368.8	25338.1	3.88737	4.88297e-05	Yes	46394.8	7785.31	27090.1	5.95928	1.42798e-12	Yes
ENSG00000067798	89795	NAV3	neuron navigator 3	2051.16	3412.31	2731.73	-1.6636	0.258285	No	1997.28	2119.39	2058.34	-1.06114	0.848167	No
ENSG00000067829	3421	IDH3G	isocitrate dehydrogenase (NAD(+)) 3 gamma	1915.29	1907.95	1911.62	1.00385	0.985261	No	2763.49	1657.21	2210.35	1.66755	2.14938e-05	No
ENSG00000067836	79641	ROGDI	rogdi atypical leucine zipper	3405.23	2120.73	2762.98	1.60569	0.0110071	No	4041.76	2268.78	3155.27	1.78147	0.000185213	No
ENSG00000067840	57595	PDZD4	PDZ domain containing 4	15251	11521.9	13386.5	1.32365	0.245357	No	12856.2	10727.1	11791.6	1.19848	0.239175	No
ENSG00000067842	492	ATP2B3	ATPase plasma membrane Ca2+ transporting 3	2652.52	600.862	1626.69	4.41452	0.000124307	Yes	2976.72	453.815	1715.27	6.55933	2.41838e-11	Yes
ENSG00000067900	6093	ROCK1	Rho associated coiled-coil containing protein kinase 1	338.422	827.927	583.174	-2.44643	0.000303322	Yes	545.561	1466.93	1006.25	-2.68885	6.76889e-08	Yes
ENSG00000067955	865	CBFB	core-binding factor subunit beta	291.026	844.977	568.002	-2.90344	0.000101447	Yes	375.171	1075.52	725.345	-2.86674	2.84708e-08	Yes
ENSG00000067992	5165	PDK3	pyruvate dehydrogenase kinase 3	318.443	36.0762	177.26	8.82696	2.13479e-06	Yes	175.936	55.423	115.68	3.17443	6.56831e-07	Yes
ENSG00000068001	8692	HYAL2	hyaluronidase 2	212.346	771.929	492.137	-3.63524	1.48726e-06	Yes	291.848	706.791	499.319	-2.42178	2.83857e-06	Yes
ENSG00000068024	9759	HDAC4	histone deacetylase 4	1209.76	1026	1117.88	1.17911	0.536493	No	1055.12	1300.38	1177.75	-1.23245	0.0184598	No
ENSG00000068028	11186	RASSF1	Ras association domain family member 1	341.98	666.134	504.057	-1.94787	0.000904721	No	416.886	697.131	557.008	-1.67223	7.31167e-05	No
ENSG00000068078	2261	FGFR3	fibroblast growth factor receptor 3	1683.58	51.2135	867.396	32.8737	1.43519e-05	Yes	2546.67	2005.85	2276.26	1.26962	0.770532	No
ENSG00000068079	3430	IFI35	interferon induced protein 35	128.815	21.1227	74.9687	6.09841	0.000191389	Yes	141.581	17.878	79.7295	7.91929	3.14261e-08	Yes
ENSG00000068097	63897	HEATR6	HEAT repeat containing 6	362.815	606.485	484.65	-1.67161	0.00586942	No	462.999	704.561	583.78	-1.52173	7.00494e-05	No
ENSG00000068120	80347	COASY	Coenzyme A synthase	1331.02	916.22	1123.62	1.45273	0.0311796	No	1555.91	1262.99	1409.45	1.23192	0.0436303	No
ENSG00000068137	79990	PLEKHH3	pleckstrin homology, MyTH4 and FERM domain containing H3	206.827	98.9214	152.874	2.09082	0.013008	Yes	202.384	182.863	192.624	1.10675	0.65061	No
ENSG00000068305	4205	MEF2A	myocyte enhancer factor 2A	2428.19	1302.71	1865.45	1.86396	0.00737426	No	3657.62	1692.6	2675.11	2.16095	9.31053e-08	Yes
ENSG00000068308	55593	OTUD5	OTU deubiquitinase 5	2753.95	1672.49	2213.22	1.64661	0.000800962	No	3318.06	1752.89	2535.47	1.89291	3.52924e-09	No
ENSG00000068323	7030	TFE3	transcription factor binding to IGHM enhancer 3	2180.88	807.075	1493.98	2.70221	2.24058e-06	Yes	2640.63	1063.24	1851.93	2.48357	3.57866e-12	Yes
ENSG00000068354	4943	TBC1D25	TBC1 domain family member 25	993.271	918.082	955.677	1.0819	0.675235	No	1000.87	810.044	905.459	1.23558	0.0556716	No
ENSG00000068366	2182	ACSL4	acyl-CoA synthetase long chain family member 4	2209.76	2303.71	2256.74	-1.04252	0.907761	No	2516.78	1523.67	2020.22	1.65179	0.0132878	No
ENSG00000068383	3632	INPP5A	inositol polyphosphate-5-phosphatase A	1312.04	859.226	1085.64	1.52701	0.00390324	No	1701.87	832.15	1267.01	2.04515	3.21084e-11	Yes
ENSG00000068394	27238	GPKOW	G-patch domain and KOW motifs	710.357	674.717	692.537	1.05282	0.753352	No	965.951	730.008	847.98	1.32321	0.0139987	No
ENSG00000068400	56850	GRIPAP1	GRIP1 associated protein 1	2905.87	1728.39	2317.13	1.68125	0.0111966	No	5056.84	3140.66	4098.75	1.61012	1.87693e-07	No
ENSG00000068438	24140	FTSJ1	FtsJ RNA 2'-O-methyltransferase 1	446.825	967.507	707.166	-2.16529	5.9605e-06	Yes	572.467	936.935	754.701	-1.63666	2.90516e-07	No
ENSG00000068489	55771	PRR11	proline rich 11	10.7455	41.6171	26.1813	-3.87297	0.0329452	Yes	12.8452	121.546	67.1955	-9.46236	2.98681e-06	Yes
ENSG00000068615	65055	REEP1	receptor accessory protein 1	2650.01	7858.05	5254.03	-2.96529	0.000127591	Yes	3073.86	5964.06	4518.96	-1.94025	0.000364596	No
ENSG00000068650	23250	ATP11A	ATPase phospholipid transporting 11A	895.907	504.268	700.087	1.77665	0.0517168	No	623.439	839.264	731.352	-1.34619	0.11379	No
ENSG00000068654	25885	POLR1A	RNA polymerase I subunit A	974.712	1582.02	1278.36	-1.62306	0.0456179	No	1076.28	1908.47	1492.37	-1.77321	2.78252e-06	No
ENSG00000068697	9741	LAPTM4A	lysosomal protein transmembrane 4 alpha	1610.57	2549.4	2079.99	-1.58292	0.0193981	No	2036.31	2628.53	2332.42	-1.29083	0.00986807	No
ENSG00000068724	57217	TTC7A	tetratricopeptide repeat domain 7A	335.793	130.384	233.088	2.57541	0.00974541	Yes	569.781	417.215	493.498	1.36568	0.0382115	No
ENSG00000068745	51447	IP6K2	inositol hexakisphosphate kinase 2	1259.03	3985.52	2622.28	-3.16554	9.26808e-08	Yes	1938.78	4625.03	3281.9	-2.38554	2.03708e-11	Yes
ENSG00000068784	55133	SRBD1	S1 RNA binding domain 1	88.1466	298.596	193.371	-3.38749	9.7763e-05	Yes	132.173	410.912	271.543	-3.10889	2.09387e-09	Yes
ENSG00000068793	---	---	---	1205.33	1971.4	1588.37	-1.63557	0.00483959	No	1365.35	2303.89	1834.62	-1.6874	1.24691e-06	No
ENSG00000068796	3796	KIF2A	kinesin family member 2A	1628.18	3522.11	2575.14	-2.16322	0.000833839	Yes	1394.79	2444.03	1919.41	-1.75227	0.00568787	No
ENSG00000068831	10235	RASGRP2	RAS guanyl releasing protein 2	511.841	310.545	411.193	1.6482	0.123625	No	775.866	502.693	639.28	1.54342	0.0985992	No
ENSG00000068878	23198	PSME4	proteasome activator subunit 4	892.591	1737.04	1314.82	-1.94607	0.000999916	No	1116.5	2088.82	1602.66	-1.87086	4.90417e-06	No
ENSG00000068885	57560	IFT80	intraflagellar transport 80	268.368	127.223	197.795	2.10943	0.00602801	Yes	496.572	404.516	450.544	1.22757	0.185203	No
ENSG00000068903	22933	SIRT2	sirtuin 2	4623.86	1891.64	3257.75	2.44436	4.5152e-05	Yes	4872.46	2226.93	3549.7	2.18797	1.67335e-07	Yes
ENSG00000068912	27248	ERLEC1	endoplasmic reticulum lectin 1	2151.38	906.534	1528.96	2.37319	0.000100202	Yes	3055.23	1035.69	2045.46	2.94993	1.45987e-15	Yes
ENSG00000068971	5526	PPP2R5B	protein phosphatase 2 regulatory subunit B'beta	3576.17	2108.33	2842.25	1.69621	0.011381	No	3292.09	1919.22	2605.65	1.71533	7.47647e-05	No
ENSG00000068976	5837	PYGM	glycogen phosphorylase, muscle associated	460.91	7.71547	234.313	59.7385	4.00593e-09	Yes	645.681	16.1743	330.928	39.9202	2.62974e-15	Yes
ENSG00000069011	5307	PITX1	paired like homeodomain 1	0.822164	0.725999	0.774082	1.13246	0.760132	No	0.756838	1.09201	0.924426	-1.44286	0.38576	No
ENSG00000069018	57113	TRPC7	transient receptor potential cation channel subfamily C member 7	2.81692	7.7294	5.27316	-2.74392	0.202759	No	2.64502	13.4339	8.03947	-5.07894	0.0138293	Yes
ENSG00000069020	375449	MAST4	microtubule associated serine/threonine kinase family member 4	1299.71	282.561	791.134	4.59974	0.000133847	Yes	1523.04	508.685	1015.86	2.99407	0.000139924	Yes
ENSG00000069122	221395	ADGRF5	adhesion G protein-coupled receptor F5	1020.85	200.294	610.574	5.09679	1.25223e-06	Yes	1061.14	295.781	678.46	3.58758	8.91827e-11	Yes
ENSG00000069188	54549	SDK2	sidekick cell adhesion molecule 2	442.516	507.128	474.822	-1.14601	0.834337	No	376.996	595.849	486.423	-1.58052	0.122364	No
ENSG00000069248	55746	NUP133	nucleoporin 133	1050.3	1774.61	1412.46	-1.68961	0.0028136	No	1259.64	1771.21	1515.43	-1.40612	0.000138408	No
ENSG00000069275	64710	NUCKS1	nuclear casein kinase and cyclin dependent kinase substrate 1	5494.88	7494.98	6494.93	-1.36399	0.1803	No	9667.66	12049.3	10858.5	-1.24635	0.0239248	No
ENSG00000069329	55737	VPS35	VPS35 retromer complex component	4714.98	3699.71	4207.35	1.27442	0.156035	No	4871.82	3726.04	4298.93	1.30751	0.0032359	No
ENSG00000069345	10294	DNAJA2	DnaJ heat shock protein family (Hsp40) member A2	2908.81	2588.9	2748.85	1.12357	0.595897	No	3449.1	2212.31	2830.71	1.55905	1.71744e-07	No
ENSG00000069399	602	BCL3	BCL3 transcription coactivator	64.7891	14.7582	39.7737	4.39003	0.0575516	No	90.5255	18.4641	54.4948	4.90279	8.41702e-07	Yes
ENSG00000069424	8514	KCNAB2	potassium voltage-gated channel subfamily A regulatory beta subunit 2	13275.9	553.219	6914.54	23.9975	1.89127e-11	Yes	14099.2	687.973	7393.59	20.4938	1.61978e-20	Yes
ENSG00000069431	10060	ABCC9	ATP binding cassette subfamily C member 9	173.479	147.077	160.278	1.17952	0.600488	No	187.368	147.736	167.552	1.26826	0.205292	No
ENSG00000069482	51083	GAL	galanin and GMAP prepropeptide	27.1876	0.994588	14.0911	27.3356	9.32391e-08	Yes	32.3921	3.17524	17.7837	10.2015	0.000100735	Yes
ENSG00000069493	29121	CLEC2D	C-type lectin domain family 2 member D	6.6029	8.79202	7.69746	-1.33154	0.623142	No	18.9494	80.9529	49.9512	-4.27205	2.1551e-06	Yes
ENSG00000069509	139341	FUNDC1	FUN14 domain containing 1	505.838	307.38	406.609	1.64565	0.0470148	No	889.134	388.195	638.664	2.29043	6.98552e-10	Yes
ENSG00000069535	4129	MAOB	monoamine oxidase B	1670.38	76.0457	873.215	21.9655	6.85973e-10	Yes	2920.02	104.619	1512.32	27.9109	2.77658e-16	Yes
ENSG00000069667	6095	RORA	RAR related orphan receptor A	624.029	76.8978	350.463	8.11504	9.05184e-07	Yes	692.514	298.647	495.58	2.31884	0.00632475	Yes
ENSG00000069696	1815	DRD4	dopamine receptor D4	23.3749	26.0934	24.7341	-1.1163	0.800436	No	13.8881	27.409	20.6485	-1.97356	0.108252	No
ENSG00000069702	7049	TGFBR3	transforming growth factor beta receptor 3	227.931	32.0881	130.009	7.10327	0.00736479	Yes	290.778	74.9893	182.884	3.8776	0.000104946	Yes
ENSG00000069712	---	---	---	2854.31	494.907	1674.61	5.76737	2.15516e-08	Yes	3136.42	641.595	1889.01	4.88847	5.06903e-09	Yes
ENSG00000069812	54626	HES2	hes family bHLH transcription factor 2	0.819823	1.51478	1.1673	-1.84769	0.224105	No	0.740059	2.46271	1.60138	-3.32772	0.00741415	Yes
ENSG00000069849	483	ATP1B3	ATPase Na+/K+ transporting subunit beta 3	1894.07	2371.69	2132.88	-1.25217	0.124439	No	2565.67	3081.67	2823.67	-1.20112	0.0301022	No
ENSG00000069869	4734	NEDD4	NEDD4 E3 ubiquitin protein ligase	42.87	72.6476	57.7588	-1.6946	0.163691	No	60.2228	146.532	103.377	-2.43316	0.000384605	Yes
ENSG00000069943	9488	PIGB	phosphatidylinositol glycan anchor biosynthesis class B	92.3821	37.0117	64.6969	2.49602	0.000160257	Yes	241.948	128.022	184.985	1.8899	4.12807e-05	No
ENSG00000069956	5597	MAPK6	mitogen-activated protein kinase 6	1679.34	4246.83	2963.09	-2.52887	0.000662875	Yes	2020.66	3403.62	2712.14	-1.68441	0.00101223	No
ENSG00000069966	10681	GNB5	G protein subunit beta 5	1892.78	1090.44	1491.61	1.73579	0.000904864	No	2165.29	1081.67	1623.48	2.0018	9.28685e-09	Yes
ENSG00000069974	5873	RAB27A	RAB27A, member RAS oncogene family	44.0643	30.5031	37.2837	1.44459	0.218394	No	83.5969	112.254	97.9255	-1.3428	0.0706694	No
ENSG00000069998	27440	HDHD5	haloacid dehalogenase like hydrolase domain containing 5	528.08	1493.69	1010.88	-2.82852	1.01427e-06	Yes	671.558	1499.49	1085.52	-2.23285	1.75698e-09	Yes
ENSG00000070010	7353	UFD1	ubiquitin recognition factor in ER associated degradation 1	456.865	894.461	675.663	-1.95783	0.000358912	No	854.461	1024.98	939.721	-1.19956	0.0134069	No
ENSG00000070018	4040	LRP6	LDL receptor related protein 6	568.853	1739.08	1153.97	-3.05717	3.0622e-05	Yes	777.099	2372.72	1574.91	-3.05331	1.99976e-08	Yes
ENSG00000070019	2984	GUCY2C	guanylate cyclase 2C	9.13736	2.42772	5.78254	3.76376	0.0195843	Yes	6.5456	1.57505	4.06032	4.15582	0.000238728	Yes
ENSG00000070031	6343	SCT	secretin	2.6209	1.9396	2.28025	1.35126	0.577723	No	1.1644	1.30684	1.23562	-1.12233	0.742015	No
ENSG00000070047	57661	PHRF1	PHD and ring finger domains 1	811.456	1687.01	1249.23	-2.07899	0.000993674	Yes	895.608	1981.7	1438.65	-2.21268	8.114e-07	Yes
ENSG00000070061	8518	ELP1	elongator complex protein 1	1532.97	1723.53	1628.25	-1.12431	0.474772	No	2459.75	2987.27	2723.51	-1.21446	0.0507918	No
ENSG00000070081	4925	NUCB2	nucleobindin 2	356.918	677.121	517.019	-1.89713	0.00707852	No	876.568	1111.36	993.962	-1.26785	0.00100278	No
ENSG00000070087	5217	PFN2	profilin 2	14536.1	11431.3	12983.7	1.2716	0.335254	No	18856.2	9562.52	14209.4	1.97189	1.81152e-08	No
ENSG00000070159	5774	PTPN3	protein tyrosine phosphatase non-receptor type 3	935.41	33.558	484.484	27.8744	6.42472e-08	Yes	947.854	91.6444	519.749	10.3427	1.16609e-08	Yes
ENSG00000070182	6710	SPTB	spectrin beta, erythrocytic	1995.98	624.773	1310.38	3.19472	0.000652311	Yes	1887.63	793.982	1340.81	2.37743	5.49514e-05	Yes
ENSG00000070190	27071	DAPP1	dual adaptor of phosphotyrosine and 3-phosphoinositides 1	3.5565	1.6036	2.58005	2.21782	0.124439	No	5.25421	3.22497	4.23959	1.62922	0.241551	No
ENSG00000070193	2255	FGF10	fibroblast growth factor 10	27.7936	25.0129	26.4032	1.11117	0.91906	No	20.5919	6.8794	13.7357	2.99327	0.0926866	No
ENSG00000070214	23446	SLC44A1	solute carrier family 44 member 1	4828.95	2367.32	3598.13	2.03984	0.00629623	Yes	3454	1834.67	2644.34	1.88263	0.0151257	No
ENSG00000070269	54916	TMEM260	transmembrane protein 260	233.071	207.293	220.182	1.12435	0.565142	No	568.181	663.888	616.035	-1.16844	0.103199	No
ENSG00000070366	23293	SMG6	SMG6 nonsense mediated mRNA decay factor	1299.15	1708.79	1503.97	-1.31532	0.167172	No	1582.65	2304.45	1943.55	-1.45607	3.6871e-05	No
ENSG00000070367	10640	EXOC5	exocyst complex component 5	1157.57	3289.67	2223.62	-2.84187	9.27864e-05	Yes	1422.49	3286.15	2354.32	-2.31014	6.97186e-07	Yes
ENSG00000070371	8218	CLTCL1	clathrin heavy chain like 1	196.089	483.95	340.019	-2.46801	0.00180514	Yes	187.863	527.13	357.497	-2.80592	1.06364e-08	Yes
ENSG00000070388	27006	FGF22	fibroblast growth factor 22	35.6215	5.10994	20.3657	6.97101	0.000103633	Yes	41.9222	10.5509	26.2366	3.97333	0.000326414	Yes
ENSG00000070404	10272	FSTL3	follistatin like 3	192.516	126.798	159.657	1.51829	0.0693874	No	442.95	168.086	305.518	2.63526	1.74616e-07	Yes
ENSG00000070413	9993	DGCR2	DiGeorge syndrome critical region gene 2	4671.07	4190.08	4430.58	1.11479	0.494099	No	4058.84	3328.47	3693.65	1.21943	0.0468066	No
ENSG00000070423	55658	RNF126	ring finger protein 126	820.865	850.235	835.55	-1.03578	0.856988	No	740.673	790.821	765.747	-1.06771	0.77556	No
ENSG00000070444	4335	MNT	MAX network transcriptional repressor	874.42	880.646	877.533	-1.00712	0.983955	No	1292.35	1363.37	1327.86	-1.05496	0.700444	No
ENSG00000070476	79364	ZXDC	ZXD family zinc finger C	307.479	830.635	569.057	-2.70143	0.000322558	Yes	389.366	984.577	686.971	-2.52867	2.79542e-11	Yes
ENSG00000070495	23210	JMJD6	jumonji domain containing 6, arginine demethylase and lysine hydroxylase	579.245	1376.65	977.946	-2.37662	1.2762e-05	Yes	693.389	1429.89	1061.64	-2.06218	1.65148e-09	Yes
ENSG00000070501	5423	POLB	DNA polymerase beta	459.944	1551.79	1005.87	-3.37387	2.86816e-05	Yes	788.858	1513.06	1150.96	-1.91804	7.22144e-10	No
ENSG00000070526	55808	ST6GALNAC1	ST6 N-acetylgalactosaminide alpha-2,6-sialyltransferase 1	65.2581	13.65	39.454	4.78082	0.000729762	Yes	72.4717	11.2595	41.8656	6.43648	6.46799e-07	Yes
ENSG00000070540	55062	WIPI1	WD repeat domain, phosphoinositide interacting 1	173.184	66.7912	119.987	2.59291	0.0007352	Yes	313.061	147.37	230.216	2.12431	6.06476e-07	Yes
ENSG00000070601	22844	FRMPD1	FERM and PDZ domain containing 1	156.772	38.953	97.8623	4.02464	2.46982e-05	Yes	166.671	53.4718	110.072	3.11699	5.56483e-05	Yes
ENSG00000070610	57704	GBA2	glucosylceramidase beta 2	3404.79	2053.64	2729.21	1.65792	0.00539196	No	4190.98	3001.5	3596.24	1.3963	8.06896e-05	No
ENSG00000070614	3340	NDST1	N-deacetylase and N-sulfotransferase 1	2804.74	3145.99	2975.37	-1.12167	0.654297	No	2678.99	3171.86	2925.42	-1.18398	0.207282	No
ENSG00000070669	440	ASNS	asparagine synthetase (glutamine-hydrolyzing)	2574.68	2252.3	2413.49	1.14313	0.468324	No	4092.44	3458.16	3775.3	1.18342	0.0721481	No
ENSG00000070718	10947	AP3M2	adaptor related protein complex 3 subunit mu 2	2728.55	1278.72	2003.63	2.13381	6.98142e-05	Yes	3073.83	1492.92	2283.37	2.05893	5.17035e-09	Yes
ENSG00000070729	1258	CNGB1	cyclic nucleotide gated channel beta 1	173.791	0.997349	87.394	174.253	9.94838e-11	Yes	211.243	9.58307	110.413	22.0433	0.000603414	Yes
ENSG00000070731	10610	ST6GALNAC2	ST6 N-acetylgalactosaminide alpha-2,6-sialyltransferase 2	19.9962	23.6331	21.8146	-1.18188	0.591392	No	27.0399	3.89863	15.4693	6.93574	2.26455e-05	Yes
ENSG00000070748	1103	CHAT	choline O-acetyltransferase	0.891985	2.77473	1.83336	-3.11073	0.0273768	Yes	1.03696	9.16932	5.10314	-8.84255	0.000139089	Yes
ENSG00000070756	26986	PABPC1	poly(A) binding protein cytoplasmic 1	3006.75	22942.9	12974.8	-7.63048	5.07045e-10	Yes	3573.93	15986	9779.96	-4.47295	8.32772e-13	Yes
ENSG00000070759	10420	TESK2	testis associated actin remodelling kinase 2	224.014	18.0206	121.017	12.431	1.00698e-08	Yes	242.024	31.893	136.959	7.58864	1.84917e-13	Yes
ENSG00000070761	29105	CFAP20	cilia and flagella associated protein 20	956.533	1507.78	1232.16	-1.5763	0.00219379	No	1425.37	1493.06	1459.22	-1.04749	0.571737	No
ENSG00000070770	1459	CSNK2A2	casein kinase 2 alpha 2	1610.66	2536.61	2073.63	-1.57488	0.00443473	No	1944.07	2558.28	2251.18	-1.31594	0.00144912	No
ENSG00000070778	11099	PTPN21	protein tyrosine phosphatase non-receptor type 21	226.968	608.075	417.521	-2.67913	1.3456e-05	Yes	364.306	923.049	643.678	-2.53372	2.25692e-09	Yes
ENSG00000070785	8891	EIF2B3	eukaryotic translation initiation factor 2B subunit gamma	617.518	831.558	724.538	-1.34661	0.0938301	No	808.984	742.903	775.944	1.08895	0.36991	No
ENSG00000070808	815	CAMK2A	calcium/calmodulin dependent protein kinase II alpha	48191.2	250.947	24221.1	192.037	1.17066e-16	Yes	41140.6	571.506	20856.1	71.9863	1.03439e-17	Yes
ENSG00000070814	6949	TCOF1	treacle ribosome biogenesis factor 1	1062.55	1100.27	1081.41	-1.03551	0.909709	No	1579.6	2079.34	1829.47	-1.31637	0.000771183	No
ENSG00000070831	998	CDC42	cell division cycle 42	3479.21	7765.94	5622.57	-2.2321	0.000859433	Yes	5630.05	7778.29	6704.17	-1.38157	0.0015917	No
ENSG00000070882	26031	OSBPL3	oxysterol binding protein like 3	752.712	218.036	485.374	3.45224	0.000162613	Yes	941.212	350.195	645.704	2.68768	3.13945e-05	Yes
ENSG00000070886	2046	EPHA8	EPH receptor A8	44.941	31.0757	38.0083	1.44618	0.644634	No	66.764	82.0889	74.4265	-1.22954	0.798113	No
ENSG00000070915	6559	SLC12A3	solute carrier family 12 member 3	0.788932	0.60826	0.698596	1.29703	0.476413	No	3.44029	1.22848	2.33439	2.80043	0.0044514	Yes
ENSG00000070950	56852	RAD18	RAD18 E3 ubiquitin protein ligase	108.117	289.994	199.055	-2.68224	0.000125671	Yes	161.504	481.481	321.493	-2.98123	3.12073e-08	Yes
ENSG00000070961	490	ATP2B1	ATPase plasma membrane Ca2+ transporting 1	11850.4	3497.71	7674.06	3.38805	6.03571e-05	Yes	11581.4	2543.42	7062.42	4.55349	8.32764e-09	Yes
ENSG00000071051	8440	NCK2	NCK adaptor protein 2	998.832	3078.14	2038.48	-3.08174	1.24708e-06	Yes	1256.63	2591.37	1924	-2.06216	5.97612e-05	Yes
ENSG00000071054	9448	MAP4K4	mitogen-activated protein kinase kinase kinase kinase 4	5268.42	12571.4	8919.92	-2.38619	7.32661e-05	Yes	3179.05	10449	6814.02	-3.28682	2.7546e-06	Yes
ENSG00000071073	11320	MGAT4A	alpha-1,3-mannosyl-glycoprotein 4-beta-N-acetylglucosaminyltransferase A	877.276	367.055	622.166	2.39004	0.000672886	Yes	1162.59	471.457	817.025	2.46596	0.000629334	Yes
ENSG00000071082	6160	RPL31	ribosomal protein L31	6539.02	15689.3	11114.2	-2.39933	0.00662199	Yes	10764.2	12193.2	11478.7	-1.13276	0.32011	No
ENSG00000071127	9948	WDR1	WD repeat domain 1	2447.32	3802.95	3125.13	-1.55393	0.00325235	No	2942.57	3365.43	3154	-1.14371	0.144149	No
ENSG00000071189	23161	SNX13	sorting nexin 13	1053.76	1013.9	1033.83	1.03931	0.871422	No	1256.03	1279.56	1267.79	-1.01873	0.905917	No
ENSG00000071205	79658	ARHGAP10	Rho GTPase activating protein 10	200.179	19.8181	109.999	10.1008	2.70047e-06	Yes	244.649	46.5194	145.584	5.25906	2.44329e-08	Yes
ENSG00000071242	6196	RPS6KA2	ribosomal protein S6 kinase A2	3127.48	2161.66	2644.57	1.44679	0.0365095	No	2812.06	1929.95	2371.01	1.45707	0.00516366	No
ENSG00000071243	54556	ING3	inhibitor of growth family member 3	196.956	304.404	250.68	-1.54554	0.0267584	No	293.961	468.519	381.24	-1.59381	3.5328e-05	No
ENSG00000071246	22846	VASH1	vasohibin 1	678.871	3114.97	1896.92	-4.58846	4.61833e-08	Yes	1329.59	5851.94	3590.76	-4.40131	3.53451e-15	Yes
ENSG00000071282	29995	LMCD1	LIM and cysteine rich domains 1	111.157	42.5455	76.851	2.61265	0.00822445	Yes	123.941	65.7307	94.8356	1.88558	0.00290702	No
ENSG00000071462	114049	BUD23	BUD23 rRNA methyltransferase and ribosome maturation factor	676.28	721.634	698.957	-1.06706	0.692043	No	1159.55	1063.34	1111.44	1.09048	0.33105	No
ENSG00000071537	6400	SEL1L	SEL1L adaptor subunit of ERAD E3 ubiquitin ligase	2443.55	2635.21	2539.38	-1.07843	0.78817	No	2541.02	2197.52	2369.27	1.15631	0.380925	No
ENSG00000071539	9319	TRIP13	thyroid hormone receptor interactor 13	71.0748	385.737	228.406	-5.42721	9.29004e-06	Yes	118.976	454.322	286.649	-3.81862	5.73537e-07	Yes
ENSG00000071553	537	ATP6AP1	ATPase H+ transporting accessory protein 1	8054.79	3706.82	5880.8	2.17296	9.63857e-05	Yes	7805.73	3572.89	5689.31	2.18471	2.04516e-09	Yes
ENSG00000071564	6929	TCF3	transcription factor 3	337.938	2279.43	1308.69	-6.74513	4.84204e-06	Yes	413.994	4333.36	2373.68	-10.4672	2.42166e-10	Yes
ENSG00000071575	28951	TRIB2	tribbles pseudokinase 2	1717.38	2482.46	2099.92	-1.44549	0.0903164	No	1797.46	3886.23	2841.85	-2.16207	0.000361471	Yes
ENSG00000071626	26528	DAZAP1	DAZ associated protein 1	903.897	1995.01	1449.45	-2.20712	1.12295e-05	Yes	1397.4	3013.65	2205.52	-2.15662	4.57566e-07	Yes
ENSG00000071655	53615	MBD3	methyl-CpG binding domain protein 3	1503.64	1577.75	1540.69	-1.04929	0.865103	No	1235.25	2234.34	1734.79	-1.80882	0.0205261	No
ENSG00000071794	6596	HLTF	helicase like transcription factor	885.258	1500.12	1192.69	-1.69455	0.0164521	No	1400.77	2320.82	1860.8	-1.65682	0.000111135	No
ENSG00000071859	9130	FAM50A	family with sequence similarity 50 member A	1160	1323.63	1241.81	-1.14106	0.482051	No	2139.34	1739.68	1939.51	1.22973	0.103198	No
ENSG00000071889	60343	FAM3A	family with sequence similarity 3 member A	1067.71	614.642	841.175	1.73712	0.00321139	No	1186.62	752.727	969.672	1.57642	0.00221994	No
ENSG00000071894	29894	CPSF1	cleavage and polyadenylation specific factor 1	1182.24	2148.74	1665.49	-1.81752	0.013639	No	1546.02	4334.08	2940.05	-2.80338	3.03556e-07	Yes
ENSG00000071909	140469	MYO3B	myosin IIIB	3.74661	3.28773	3.51717	1.13957	0.847699	No	8.10219	6.00698	7.05458	1.3488	0.441394	No
ENSG00000071967	79901	CYBRD1	cytochrome b reductase 1	682.006	104.635	393.321	6.51797	0.000821195	Yes	847.289	262.177	554.733	3.23174	0.00100985	Yes
ENSG00000071991	28513	CDH19	cadherin 19	121.034	0.579221	60.8065	208.96	2.42464e-11	Yes	92.5417	1.40719	46.9744	65.7635	1.42847e-11	Yes
ENSG00000071994	5134	PDCD2	programmed cell death 2	462.747	1005.58	734.165	-2.17308	0.000143826	Yes	652.166	1002.33	827.25	-1.53693	1.39273e-07	No
ENSG00000072041	55117	SLC6A15	solute carrier family 6 member 15	1330.69	1319.9	1325.3	1.00817	0.977426	No	1632.37	1423.49	1527.93	1.14674	0.396601	No
ENSG00000072042	51109	RDH11	retinol dehydrogenase 11	1819.45	1701.28	1760.37	1.06945	0.673252	No	2416.78	1967.72	2192.25	1.22822	0.00895099	No
ENSG00000072062	5566	PRKACA	protein kinase cAMP-activated catalytic subunit alpha	3761.25	1800.9	2781.08	2.08854	0.000196428	Yes	4901.54	2119.5	3510.52	2.31259	6.00938e-09	Yes
ENSG00000072071	22859	ADGRL1	adhesion G protein-coupled receptor L1	5538.02	5461.97	5500	1.01392	0.970424	No	4178.99	5183.93	4681.46	-1.24047	0.161181	No
ENSG00000072110	87	ACTN1	actinin alpha 1	3519.64	779.203	2149.42	4.51697	4.96706e-05	Yes	4520.22	1190.01	2855.11	3.79849	2.86543e-11	Yes
ENSG00000072121	23503	ZFYVE26	zinc finger FYVE-type containing 26	474.344	709.572	591.958	-1.4959	0.113167	No	675.39	1103.33	889.358	-1.63361	2.87399e-06	No
ENSG00000072133	27330	RPS6KA6	ribosomal protein S6 kinase A6	92.8178	173.467	133.142	-1.86889	0.0228477	No	99.1709	165.112	132.141	-1.66492	0.0943639	No
ENSG00000072134	22905	EPN2	epsin 2	1963.56	1415.6	1689.58	1.38708	0.0568102	No	3191.06	2367.39	2779.23	1.34792	0.000772423	No
ENSG00000072135	26469	PTPN18	protein tyrosine phosphatase non-receptor type 18	409.98	414.897	412.439	-1.01199	0.959937	No	1040.97	1038.9	1039.94	1.002	0.98564	No
ENSG00000072163	55679	LIMS2	LIM zinc finger domain containing 2	573.938	146.083	360.01	3.92885	1.27844e-06	Yes	532.163	159.977	346.07	3.32649	1.15809e-05	Yes
ENSG00000072182	55515	ASIC4	acid sensing ion channel subunit family member 4	141.165	16.2663	78.7156	8.67835	3.95217e-05	Yes	286.274	96.3416	191.308	2.97145	0.0460274	Yes
ENSG00000072195	10290	SPEG	striated muscle enriched protein kinase	1436.48	620.435	1028.46	2.31528	0.0221272	Yes	1908.23	1956.74	1932.49	-1.02542	0.897873	No
ENSG00000072201	84708	LNX1	ligand of numb-protein X 1	1469.89	1168.14	1319.01	1.25832	0.486783	No	1778.19	330.421	1054.31	5.3816	5.11169e-05	Yes
ENSG00000072210	224	ALDH3A2	aldehyde dehydrogenase 3 family member A2	1190.04	1109.84	1149.94	1.07226	0.707519	No	1601.41	1524.75	1563.08	1.05027	0.593807	No
ENSG00000072274	7037	TFRC	transferrin receptor	1862.45	1380.86	1621.65	1.34876	0.145265	No	1906.13	1746.6	1826.36	1.09134	0.507877	No
ENSG00000072310	6720	SREBF1	sterol regulatory element binding transcription factor 1	1402.34	854.664	1128.5	1.64081	0.070214	No	1190.63	1528.19	1359.41	-1.28351	0.220324	No
ENSG00000072315	7224	TRPC5	transient receptor potential cation channel subfamily C member 5	141.192	118.536	129.864	1.19113	0.858986	No	94.3564	36.4696	65.413	2.58726	0.166167	No
ENSG00000072364	27125	AFF4	AF4/FMR2 family member 4	2042.63	4806.57	3424.6	-2.35313	0.000677672	Yes	2347.2	4641.43	3494.31	-1.97743	0.000184777	No
ENSG00000072401	7321	UBE2D1	ubiquitin conjugating enzyme E2 D1	407.731	978.272	693.002	-2.39931	0.00199925	Yes	493.151	1193	843.074	-2.41913	5.47301e-06	Yes
ENSG00000072415	64398	MPP5	membrane palmitoylated protein 5	1288.06	552.715	920.386	2.33042	0.00191175	Yes	1009.27	634.882	822.078	1.5897	0.0418125	No
ENSG00000072422	9886	RHOBTB1	Rho related BTB domain containing 1	399.079	396.532	397.806	1.00642	0.98807	No	699.476	758.945	729.211	-1.08502	0.656959	No
ENSG00000072501	8243	SMC1A	structural maintenance of chromosomes 1A	949.732	2744.56	1847.15	-2.88982	7.80325e-05	Yes	1028.2	3925.39	2476.79	-3.81773	8.65548e-11	Yes
ENSG00000072506	3028	HSD17B10	hydroxysteroid 17-beta dehydrogenase 10	455.989	1168.77	812.38	-2.56316	3.27464e-05	Yes	619.728	1051.26	835.494	-1.69633	0.000648167	No
ENSG00000072518	2011	MARK2	microtubule affinity regulating kinase 2	1866.98	1475.57	1671.27	1.26526	0.177062	No	1629.05	1539.81	1584.43	1.05796	0.557083	No
ENSG00000072571	3161	HMMR	hyaluronan mediated motility receptor	9.96669	40.0079	24.9873	-4.01416	0.0289683	Yes	16.5098	199.815	108.163	-12.1028	0.000112554	Yes
ENSG00000072609	55743	CHFR	checkpoint with forkhead and ring finger domains	354.376	1206.97	780.672	-3.4059	1.12446e-07	Yes	526.717	1309.54	918.129	-2.48623	6.49047e-10	Yes
ENSG00000072657	29953	TRHDE	thyrotropin releasing hormone degrading enzyme	935.617	15.7403	475.678	59.4408	2.94458e-10	Yes	888.926	28.4065	458.666	31.293	1.40658e-10	Yes
ENSG00000072682	8974	P4HA2	prolyl 4-hydroxylase subunit alpha 2	324.198	65.6877	194.943	4.93544	0.000334711	Yes	413.516	152.042	282.779	2.71975	2.12287e-06	Yes
ENSG00000072694	2213	FCGR2B	Fc fragment of IgG receptor IIb	21.2957	0.935707	11.1157	22.759	1.42958e-07	Yes	14.0703	0.973261	7.52177	14.4569	1.42071e-10	Yes
ENSG00000072736	4775	NFATC3	nuclear factor of activated T cells 3	167.756	391.953	279.855	-2.33645	0.000633294	Yes	250.224	776.516	513.37	-3.10329	1.43018e-08	Yes
ENSG00000072756	51095	TRNT1	tRNA nucleotidyl transferase 1	350.878	443.97	397.424	-1.26531	0.307626	No	439.386	507.742	473.564	-1.15557	0.209586	No
ENSG00000072778	37	ACADVL	acyl-CoA dehydrogenase very long chain	2664.42	801.033	1732.73	3.32623	0.000754802	Yes	7342.43	4235.48	5788.96	1.73355	2.45118e-05	No
ENSG00000072786	6793	STK10	serine/threonine kinase 10	146.995	272.707	209.851	-1.85521	0.019173	No	201.892	493.772	347.832	-2.44572	7.42647e-09	Yes
ENSG00000072803	23291	FBXW11	F-box and WD repeat domain containing 11	3553.11	2887.1	3220.11	1.23069	0.191603	No	3461.63	2710.06	3085.85	1.27733	0.0196777	No
ENSG00000072818	9744	ACAP1	ArfGAP with coiled-coil, ankyrin repeat and PH domains 1	50.9271	59.1478	55.0374	-1.16142	0.533203	No	42.3371	14.8647	28.6009	2.84816	4.89815e-05	Yes
ENSG00000072832	1400	CRMP1	collapsin response mediator protein 1	5481.75	42451.7	23966.8	-7.74419	8.09794e-10	Yes	6594.1	35971.5	21282.8	-5.4551	9.00023e-15	Yes
ENSG00000072840	2121	EVC	EvC ciliary complex subunit 1	55.0652	153.478	104.272	-2.78721	0.0109669	Yes	93.1145	291.825	192.47	-3.13405	0.000244176	Yes
ENSG00000072849	51009	DERL2	derlin 2	351.103	686.252	518.678	-1.95456	0.000157871	No	486.566	832.672	659.619	-1.71132	4.00867e-08	No
ENSG00000072858	54847	SIDT1	SID1 transmembrane family member 1	675.447	44.5683	360.008	15.1553	1.53632e-06	Yes	976.586	84.6547	530.62	11.5361	2.95646e-09	Yes
ENSG00000072864	54820	NDE1	nudE neurodevelopment protein 1	197.764	109.365	153.564	1.8083	0.27285	No	187.376	464.625	326.001	-2.47964	0.027252	Yes
ENSG00000072952	10335	MRVI1	murine retrovirus integration site 1 homolog	741.38	29.7722	385.576	24.9017	3.41934e-09	Yes	1021.2	78.853	550.028	12.9507	3.55109e-11	Yes
ENSG00000072954	79041	TMEM38A	transmembrane protein 38A	1364.56	47.6425	706.1	28.6416	1.48781e-11	Yes	1419.35	110.877	765.114	12.8011	4.05144e-15	Yes
ENSG00000072958	8907	AP1M1	adaptor related protein complex 1 subunit mu 1	2306.84	3023.84	2665.34	-1.31081	0.0774208	No	2307.89	2617.58	2462.73	-1.13419	0.225029	No
ENSG00000073008	5817	PVR	PVR cell adhesion molecule	519.552	363.132	441.342	1.43075	0.121869	No	893.27	524.577	708.924	1.70284	2.04039e-05	No
ENSG00000073009	---	---	---	105.407	89.6058	97.5066	1.17635	0.382478	No	119.156	78.6436	98.8999	1.51514	0.00096669	No
ENSG00000073050	7515	XRCC1	X-ray repair cross complementing 1	422.779	781.119	601.949	-1.84758	0.00797241	No	770.991	1428.68	1099.84	-1.85305	2.46065e-05	No
ENSG00000073060	949	SCARB1	scavenger receptor class B member 1	1331.15	1072.59	1201.87	1.24106	0.27796	No	1423.34	1029.26	1226.3	1.38288	0.0325439	No
ENSG00000073067	54905	CYP2W1	cytochrome P450 family 2 subfamily W member 1	1.18429	2.67309	1.92869	-2.25713	0.134144	No	0.913043	2.45823	1.68564	-2.69235	0.0165208	Yes
ENSG00000073111	4171	MCM2	minichromosome maintenance complex component 2	209.035	1214.57	711.801	-5.81035	0.000481219	Yes	134.542	2262.49	1198.52	-16.8162	3.22163e-07	Yes
ENSG00000073146	54456	MOV10L1	Mov10 like RISC complex RNA helicase 1	62.6268	8.43443	35.5306	7.42514	0.000436428	Yes	84.7569	21.4404	53.0986	3.95313	4.82993e-06	Yes
ENSG00000073150	56666	PANX2	pannexin 2	1586.58	264.929	925.753	5.98867	1.34187e-06	Yes	1131.24	281.033	706.137	4.02529	1.28237e-07	Yes
ENSG00000073169	83642	SELENOO	selenoprotein O	439.016	276.87	357.943	1.58564	0.205592	No	605.643	832.065	718.854	-1.37385	0.105436	No
ENSG00000073282	8626	TP63	tumor protein p63	2.82357	4.68776	3.75566	-1.66023	0.306075	No	5.43701	5.43524	5.43612	1.00032	0.999175	No
ENSG00000073331	80216	ALPK1	alpha kinase 1	22.8247	311.424	167.124	-13.6442	5.92438e-07	Yes	49.7529	385.256	217.505	-7.74339	9.46659e-08	Yes
ENSG00000073350	3993	LLGL2	LLGL scribble cell polarity complex component 2	134.631	32.008	83.3196	4.20617	8.06342e-05	Yes	113.201	52.8961	83.0484	2.14006	0.000323245	Yes
ENSG00000073417	5151	PDE8A	phosphodiesterase 8A	674.43	102.752	388.591	6.56364	1.33918e-06	Yes	964.844	363.22	664.032	2.65637	1.12221e-05	Yes
ENSG00000073464	1183	CLCN4	chloride voltage-gated channel 4	5096.17	5114.5	5105.33	-1.0036	0.991317	No	4949.05	2613.82	3781.43	1.89341	0.00222769	No
ENSG00000073536	54475	NLE1	notchless homolog 1	529.589	923.051	726.32	-1.74296	0.00100562	No	598.759	920.613	759.686	-1.53753	0.000290141	No
ENSG00000073578	6389	SDHA	succinate dehydrogenase complex flavoprotein subunit A	3447.44	2109.02	2778.23	1.63461	0.000418967	No	4613.29	2121.03	3367.16	2.17503	1.23318e-11	Yes
ENSG00000073584	6605	SMARCE1	SWI/SNF related, matrix associated, actin dependent regulator of chromatin, subfamily e, member 1	572.463	1920.68	1246.57	-3.35512	1.18269e-06	Yes	821.963	2690.24	1756.1	-3.27295	8.26796e-11	Yes
ENSG00000073598	54752	FNDC8	fibronectin type III domain containing 8	2.31674	3.00437	2.66055	-1.29681	0.533764	No	3.74093	1.02036	2.38064	3.66629	0.00224249	Yes
ENSG00000073605	55876	GSDMB	gasdermin B	101.894	35.7694	68.8318	2.84864	0.122294	No	546.397	836.876	691.637	-1.53163	0.0237566	No
ENSG00000073614	5927	KDM5A	lysine demethylase 5A	488.701	1638.61	1063.66	-3.35299	4.23315e-05	Yes	489.648	1630.87	1060.26	-3.3307	8.40872e-09	Yes
ENSG00000073670	4185	ADAM11	ADAM metallopeptidase domain 11	3022.34	379.588	1700.96	7.96216	1.20407e-05	Yes	4353.19	797.602	2575.4	5.45785	2.03684e-09	Yes
ENSG00000073711	5523	PPP2R3A	protein phosphatase 2 regulatory subunit B''alpha	287.609	1588.14	937.874	-5.52186	1.3657e-06	Yes	293.68	1297.65	795.667	-4.41859	2.17013e-08	Yes
ENSG00000073712	10979	FERMT2	fermitin family member 2	802.187	1684.42	1243.31	-2.09979	7.68616e-05	Yes	1252.45	2096.87	1674.66	-1.67422	0.00290706	No
ENSG00000073734	8647	ABCB11	ATP binding cassette subfamily B member 11	0.822022	1.19885	1.01044	-1.45842	0.507259	No	3.17124	8.65209	5.91167	-2.7283	0.0304508	Yes
ENSG00000073737	10170	DHRS9	dehydrogenase/reductase 9	31.9552	7.42429	19.6897	4.30414	0.00486841	Yes	28.9812	4.89858	16.9399	5.91626	0.000266372	Yes
ENSG00000073754	922	CD5L	CD5 molecule like	0.684439	1.20444	0.944437	-1.75974	0.331527	No	0.63616	2.56983	1.603	-4.0396	0.000522874	Yes
ENSG00000073756	5743	PTGS2	prostaglandin-endoperoxide synthase 2	215.335	35.549	125.442	6.05743	0.00108666	Yes	320.377	19.538	169.957	16.3977	9.59606e-10	Yes
ENSG00000073792	10644	IGF2BP2	insulin like growth factor 2 mRNA binding protein 2	11.888	1437.82	724.852	-120.947	8.51227e-13	Yes	17.7466	3262.15	1639.95	-183.818	6.32243e-20	Yes
ENSG00000073803	9175	MAP3K13	mitogen-activated protein kinase kinase kinase 13	717.092	726.582	721.837	-1.01323	0.947758	No	926.95	893.846	910.398	1.03704	0.778632	No
ENSG00000073849	6480	ST6GAL1	ST6 beta-galactoside alpha-2,6-sialyltransferase 1	906.922	1684.49	1295.71	-1.85737	0.0107447	No	1134.57	1571.81	1353.19	-1.38538	0.0686496	No
ENSG00000073861	30009	TBX21	T-box 21	1.41762	19.9244	10.671	-14.0548	0.00732078	Yes	2.60312	1.27496	1.93904	2.04173	0.147977	No
ENSG00000073905	---	---	---	287.368	153.709	220.539	1.86955	0.000444649	No	277.817	97.9936	187.905	2.83505	3.65007e-08	Yes
ENSG00000073910	10129	FRY	FRY microtubule binding protein	2518.48	1384.65	1951.57	1.81885	0.0812896	No	2359.06	1814.11	2086.58	1.3004	0.329327	No
ENSG00000073921	8301	PICALM	phosphatidylinositol binding clathrin assembly protein	3360.05	5327.37	4343.71	-1.5855	0.0300542	No	3949.18	5120.47	4534.83	-1.29659	0.0303642	No
ENSG00000073969	4905	NSF	N-ethylmaleimide sensitive factor, vesicle fusing ATPase	15041.2	2102.26	8571.75	7.15479	4.24353e-08	Yes	14804.3	1901.35	8352.81	7.78621	2.21808e-16	Yes
ENSG00000074047	2736	GLI2	GLI family zinc finger 2	20.5157	108.923	64.7192	-5.30925	0.0348588	Yes	33.7232	684.469	359.096	-20.2967	4.43787e-05	Yes
ENSG00000074054	23332	CLASP1	cytoplasmic linker associated protein 1	3080.89	8025.27	5553.08	-2.60486	0.000261887	Yes	3382.34	6552.35	4967.34	-1.93722	0.000117576	No
ENSG00000074071	65993	MRPS34	mitochondrial ribosomal protein S34	838.025	1374.58	1106.3	-1.64026	0.0150428	No	1153.17	1116.69	1134.93	1.03266	0.879719	No
ENSG00000074181	4854	NOTCH3	notch receptor 3	1260.65	958.729	1109.69	1.31492	0.583429	No	549.439	2480.41	1514.93	-4.51445	4.49474e-05	Yes
ENSG00000074201	1207	CLNS1A	chloride nucleotide-sensitive channel 1A	1180.05	1663.38	1421.72	-1.40958	0.148339	No	1939.42	2369.85	2154.63	-1.22194	0.106934	No
ENSG00000074211	5522	PPP2R2C	protein phosphatase 2 regulatory subunit Bgamma	10244.5	936.538	5590.53	10.9387	5.44679e-07	Yes	12132.2	1023.43	6577.84	11.8545	5.79269e-10	Yes
ENSG00000074219	8463	TEAD2	TEA domain transcription factor 2	46.7374	370.464	208.601	-7.92651	0.000240299	Yes	80.3425	1223.02	651.68	-15.2226	2.79306e-06	Yes
ENSG00000074266	8726	EED	embryonic ectoderm development	295.256	701.366	498.311	-2.37545	9.09292e-05	Yes	462.965	890.522	676.743	-1.92352	5.43731e-06	No
ENSG00000074276	54825	CDHR2	cadherin related family member 2	141.359	152.906	147.133	-1.08169	0.877567	No	66.8468	9.70521	38.276	6.88773	3.74195e-06	Yes
ENSG00000074317	6620	SNCB	synuclein beta	10424	952.415	5688.22	10.9448	1.59028e-08	Yes	14284.8	876.579	7580.67	16.296	5.82627e-11	Yes
ENSG00000074319	7251	TSG101	tumor susceptibility 101	1060.7	2248.7	1654.7	-2.12001	0.000101612	Yes	1577.29	2352.03	1964.66	-1.49118	6.34942e-07	No
ENSG00000074356	55421	NCBP3	nuclear cap binding subunit 3	390.415	953.638	672.027	-2.44263	2.29171e-05	Yes	531.419	1401.06	966.238	-2.63645	1.02946e-09	Yes
ENSG00000074370	489	ATP2A3	ATPase sarcoplasmic/endoplasmic reticulum Ca2+ transporting 3	124.609	69.5872	97.0981	1.79069	0.0528761	No	79.7179	112.032	95.8751	-1.40536	0.0553833	No
ENSG00000074410	771	CA12	carbonic anhydrase 12	40.5367	912.643	476.59	-22.514	1.46576e-07	Yes	89.0558	1386.84	737.95	-15.5728	3.92731e-06	Yes
ENSG00000074416	11343	MGLL	monoglyceride lipase	7983.67	2630.41	5307.04	3.03515	0.00113917	Yes	7487.94	1721.11	4604.53	4.35064	5.25329e-05	Yes
ENSG00000074527	59277	NTN4	netrin 4	976.205	1014.8	995.502	-1.03953	0.874322	No	1068.02	484.311	776.163	2.20522	0.000694772	Yes
ENSG00000074582	617	BCS1L	BCS1 homolog, ubiquinol-cytochrome c reductase complex chaperone	461.882	678.059	569.97	-1.46804	0.0390547	No	647.655	935.274	791.465	-1.44409	0.000768457	No
ENSG00000074590	9891	NUAK1	NUAK family kinase 1	7191.61	4638.67	5915.14	1.55036	0.036345	No	6270.23	3049.74	4659.99	2.05599	5.99069e-05	Yes
ENSG00000074603	54878	DPP8	dipeptidyl peptidase 8	1826.53	578.696	1202.61	3.15628	7.43308e-06	Yes	2269.12	858.329	1563.72	2.64364	5.7812e-09	Yes
ENSG00000074621	9187	SLC24A1	solute carrier family 24 member 1	146.424	88.2666	117.345	1.65888	0.0189723	No	98.915	82.9906	90.9528	1.19188	0.202939	No
ENSG00000074657	55205	ZNF532	zinc finger protein 532	1246.29	4171.36	2708.83	-3.34702	3.95217e-05	Yes	2191.5	7080.74	4636.12	-3.231	2.59974e-10	Yes
ENSG00000074660	8578	SCARF1	scavenger receptor class F member 1	110.526	71.4834	91.0048	1.54618	0.0937624	No	169.411	123.998	146.705	1.36625	0.0506192	No
ENSG00000074695	3998	LMAN1	lectin, mannose binding 1	575.081	977.369	776.225	-1.69953	0.0143803	No	772.71	1141.7	957.207	-1.47753	0.00699341	No
ENSG00000074696	51495	HACD3	3-hydroxyacyl-CoA dehydratase 3	3664.11	2934.94	3299.52	1.24844	0.208006	No	4362.48	3092.29	3727.38	1.41076	0.000126977	No
ENSG00000074706	26034	IPCEF1	interaction protein for cytohesin exchange factors 1	3877.16	265.067	2071.11	14.6271	1.39681e-09	Yes	3591.58	327.641	1959.61	10.9619	8.7732e-12	Yes
ENSG00000074755	23140	ZZEF1	zinc finger ZZ-type and EF-hand domain containing 1	1154.12	1495.68	1324.9	-1.29594	0.394396	No	1497.54	2122.16	1809.85	-1.4171	0.003396	No
ENSG00000074771	50508	NOX3	NADPH oxidase 3	0.945727	0.715214	0.83047	1.3223	0.537029	No	1.00824	0.884865	0.946555	1.13943	0.704327	No
ENSG00000074800	2023	ENO1	enolase 1	16567.9	10035.8	13301.9	1.65088	0.0216568	No	21922.3	12384.6	17153.4	1.77013	1.54574e-05	No
ENSG00000074803	6557	SLC12A1	solute carrier family 12 member 1	36.1382	7.16839	21.6533	5.04133	0.000134396	Yes	74.6505	6.25401	40.4523	11.9364	9.42005e-08	Yes
ENSG00000074842	56005	MYDGF	myeloid derived growth factor	750.691	1028.89	889.791	-1.37059	0.108678	No	800.392	625.215	712.804	1.28019	0.0640458	No
ENSG00000074855	57719	ANO8	anoctamin 8	689.067	1724.62	1206.84	-2.50283	0.00316106	Yes	888.245	3721.74	2304.99	-4.18999	4.67809e-12	Yes
ENSG00000074935	51175	TUBE1	tubulin epsilon 1	207.907	186.985	197.446	1.11189	0.651579	No	735.908	900.222	818.065	-1.22328	0.254239	No
ENSG00000074964	55160	ARHGEF10L	Rho guanine nucleotide exchange factor 10 like	829.493	1570.53	1200.01	-1.89336	0.00471526	No	861.201	2012.95	1437.07	-2.33737	9.18902e-09	Yes
ENSG00000074966	7294	TXK	TXK tyrosine kinase	3.14896	0.856708	2.00283	3.67565	0.018339	Yes	12.8907	4.49242	8.69158	2.86944	0.0614297	No
ENSG00000075035	9671	WSCD2	WSC domain containing 2	1523.43	83.2981	803.364	18.2889	8.93337e-09	Yes	1528.1	220.692	874.394	6.9241	1.62191e-09	Yes
ENSG00000075043	3785	KCNQ2	potassium voltage-gated channel subfamily Q member 2	2808.76	2345.93	2577.35	1.19729	0.442245	No	1508.78	2053.35	1781.06	-1.36093	0.0369035	No
ENSG00000075073	6865	TACR2	tachykinin receptor 2	43.9838	7.848	25.9159	5.60446	1.37824e-05	Yes	21.1638	3.92937	12.5466	5.38607	0.000258349	Yes
ENSG00000075089	64431	ACTR6	actin related protein 6	798.196	838.797	818.496	-1.05087	0.891237	No	1055.52	976.94	1016.23	1.08044	0.486214	No
ENSG00000075131	54962	TIPIN	TIMELESS interacting protein	62.0995	138.813	100.456	-2.23534	0.00213249	Yes	87.7875	222.042	154.915	-2.52931	2.96154e-07	Yes
ENSG00000075142	6717	SRI	sorcin	2034.75	1226.3	1630.53	1.65926	0.0323088	No	3243.08	1670.02	2456.55	1.94194	1.21884e-05	No
ENSG00000075151	8672	EIF4G3	eukaryotic translation initiation factor 4 gamma 3	4057.72	2552.43	3305.08	1.58975	0.0783594	No	5406.61	4778.99	5092.8	1.13133	0.323079	No
ENSG00000075188	79023	NUP37	nucleoporin 37	46.8189	86.4713	66.6451	-1.84693	0.133976	No	83.7129	233.714	158.714	-2.79186	7.73834e-05	Yes
ENSG00000075213	10371	SEMA3A	semaphorin 3A	293.904	2572.19	1433.05	-8.7518	6.0051e-08	Yes	309.459	1448.24	878.85	-4.6799	0.000241849	Yes
ENSG00000075218	51512	GTSE1	G2 and S-phase expressed 1	4.2273	139.269	71.7481	-32.9451	1.17665e-05	Yes	5.32946	492.948	249.139	-92.4948	2.50173e-07	Yes
ENSG00000075223	10512	SEMA3C	semaphorin 3C	558.416	5841.37	3199.89	-10.4606	2.27625e-05	Yes	427.269	2284.15	1355.71	-5.34592	5.98991e-05	Yes
ENSG00000075234	55020	TTC38	tetratricopeptide repeat domain 38	139.305	164.235	151.77	-1.17896	0.658156	No	154.461	263.606	209.033	-1.70662	0.0136008	No
ENSG00000075239	38	ACAT1	acetyl-CoA acetyltransferase 1	1118.57	1612.51	1365.54	-1.44158	0.0752363	No	1713.09	1338.74	1525.91	1.27963	0.0192814	No
ENSG00000075240	23151	GRAMD4	GRAM domain containing 4	1009.19	1454.93	1232.06	-1.44167	0.110697	No	1314.84	1861.86	1588.35	-1.41603	0.000942298	No
ENSG00000075275	9620	CELSR1	cadherin EGF LAG seven-pass G-type receptor 1	24.9658	215.749	120.358	-8.6418	0.0126007	Yes	26.692	1889.95	958.32	-70.8059	8.54387e-06	Yes
ENSG00000075290	7479	WNT8B	Wnt family member 8B	2.05972	0.782205	1.42096	2.63322	0.0427375	Yes	2.05432	10.2367	6.1455	-4.983	0.112394	No
ENSG00000075292	27332	ZNF638	zinc finger protein 638	1788.71	3089.18	2438.94	-1.72705	0.00573845	No	3756.04	6091.41	4923.72	-1.62176	7.10273e-06	No
ENSG00000075303	55972	SLC25A40	solute carrier family 25 member 40	704.387	307.008	505.697	2.29436	0.000995621	Yes	715.409	595.573	655.491	1.20121	0.193417	No
ENSG00000075336	29090	TIMM21	translocase of inner mitochondrial membrane 21	543.809	601.688	572.749	-1.10643	0.59853	No	761.92	728.857	745.389	1.04536	0.547693	No
ENSG00000075340	119	ADD2	adducin 2	6796.4	10460.6	8628.48	-1.53913	0.0689391	No	7105.17	10257.5	8681.35	-1.44367	0.0392243	No
ENSG00000075391	9462	RASAL2	RAS protein activator like 2	1274.09	1786.45	1530.27	-1.40213	0.222024	No	1779.07	2656.07	2217.57	-1.49295	0.024499	No
ENSG00000075399	9605	VPS9D1	VPS9 domain containing 1	926.825	621.768	774.297	1.49063	0.0760618	No	1575.98	1180.88	1378.43	1.33458	0.0379652	No
ENSG00000075407	7587	ZNF37A	zinc finger protein 37A	219.091	310.77	264.93	-1.41845	0.152952	No	361.792	471.342	416.567	-1.3028	0.153619	No
ENSG00000075413	4140	MARK3	microtubule affinity regulating kinase 3	1543.78	3225.17	2384.48	-2.08913	2.01006e-05	Yes	2701.64	3987.24	3344.44	-1.47586	6.18061e-07	No
ENSG00000075415	5250	SLC25A3	solute carrier family 25 member 3	7132.45	7361.69	7247.07	-1.03214	0.862273	No	7544.21	7073.74	7308.97	1.06651	0.525851	No
ENSG00000075420	64778	FNDC3B	fibronectin type III domain containing 3B	195.296	228.386	211.841	-1.16943	0.666419	No	208.598	459.879	334.239	-2.20462	3.63705e-06	Yes
ENSG00000075426	2355	FOSL2	FOS like 2, AP-1 transcription factor subunit	1389.14	1006.05	1197.6	1.38079	0.577992	No	1457.33	458.424	957.875	3.17899	0.0029276	Yes
ENSG00000075429	27091	CACNG5	calcium voltage-gated channel auxiliary subunit gamma 5	17.9316	6.55789	12.2448	2.73436	0.0130525	Yes	11.3469	5.66056	8.50373	2.00455	0.227204	No
ENSG00000075461	27092	CACNG4	calcium voltage-gated channel auxiliary subunit gamma 4	500.162	3291.11	1895.64	-6.58008	5.99909e-09	Yes	573.171	4960.46	2766.82	-8.65443	9.60074e-14	Yes
ENSG00000075539	285527	FRYL	FRY like transcription coactivator	1275.99	1269.35	1272.67	1.00523	0.986253	No	1484.04	2009.11	1746.57	-1.35381	0.0409533	No
ENSG00000075568	23505	TMEM131	transmembrane protein 131	1149.62	1534.96	1342.29	-1.33519	0.195954	No	1566.12	2770.76	2168.44	-1.76919	2.70276e-06	No
ENSG00000075618	6624	FSCN1	fascin actin-bundling protein 1	5516.28	17716.4	11616.4	-3.21166	9.71964e-07	Yes	3227.91	9741.02	6484.47	-3.01775	4.11581e-08	Yes
ENSG00000075624	60	ACTB	actin beta	46852.3	93712.4	70282.4	-2.00017	0.000125832	Yes	50372.9	81538.6	65955.7	-1.6187	3.42642e-06	No
ENSG00000075643	55034	MOCOS	molybdenum cofactor sulfurase	7.54321	5.25281	6.39801	1.43603	0.328754	No	9.31135	17.8138	13.5626	-1.91312	0.0659781	No
ENSG00000075651	5337	PLD1	phospholipase D1	376.329	37.8541	207.092	9.94156	1.66959e-05	Yes	285.869	72.271	179.07	3.95552	1.57122e-05	Yes
ENSG00000075673	479	ATP12A	ATPase H+/K+ transporting non-gastric alpha2 subunit	19.5069	1.16546	10.3362	16.7374	1.80978e-05	Yes	12.4799	2.31783	7.39889	5.38431	0.00156595	Yes
ENSG00000075702	284403	WDR62	WD repeat domain 62	65.9191	70.3138	68.1165	-1.06667	0.929924	No	73.899	451.818	262.858	-6.11399	0.000600163	Yes
ENSG00000075711	1739	DLG1	discs large MAGUK scaffold protein 1	2798.67	924.616	1861.64	3.02685	3.12628e-06	Yes	3085.69	1345.14	2215.42	2.29395	1.65765e-08	Yes
ENSG00000075785	7879	RAB7A	RAB7A, member RAS oncogene family	5965.76	4786.6	5376.18	1.24635	0.113787	No	8281.29	4952.21	6616.75	1.67224	2.11223e-08	No
ENSG00000075790	55973	BCAP29	B cell receptor associated protein 29	1562.34	916.574	1239.46	1.70455	0.0547768	No	2453.82	908.124	1680.97	2.70208	3.04459e-06	Yes
ENSG00000075826	25956	SEC31B	SEC31 homolog B, COPII coat complex component	263.709	50.6216	157.165	5.20942	0.0290869	Yes	1131.14	1324.14	1227.64	-1.17063	0.275869	No
ENSG00000075856	9733	SART3	spliceosome associated factor 3, U4/U6 recycling protein	1097.19	1861.09	1479.14	-1.69623	0.000737718	No	1508.09	2356.32	1932.2	-1.56245	5.15112e-09	No
ENSG00000075884	55843	ARHGAP15	Rho GTPase activating protein 15	22.4248	37.6976	30.0612	-1.68107	0.130569	No	36.8445	27.9039	32.3742	1.32041	0.307758	No
ENSG00000075886	113457	TUBA3D	tubulin alpha 3d	14.0245	6.17466	10.0996	2.27129	0.142082	No	22.3243	1.01913	11.6717	21.9053	7.7858e-11	Yes
ENSG00000075891	5076	PAX2	paired box 2	5.76933	0.607216	3.18827	9.50128	9.28589e-06	Yes	6.8001	3.64443	5.22227	1.86589	0.529289	No
ENSG00000075914	23016	EXOSC7	exosome component 7	390.971	618.711	504.841	-1.5825	0.0143389	No	540.844	651.782	596.313	-1.20512	0.0505264	No
ENSG00000075945	22920	KIFAP3	kinesin associated protein 3	5259.26	6640.69	5949.97	-1.26266	0.326877	No	6962.17	5327.32	6144.74	1.30688	0.0587251	No
ENSG00000075975	23609	MKRN2	makorin ring finger protein 2	993.374	824.715	909.044	1.20451	0.136371	No	1243.72	903.013	1073.36	1.3773	8.43563e-05	No
ENSG00000076003	4175	MCM6	minichromosome maintenance complex component 6	532.832	1771.98	1152.4	-3.32559	9.65109e-05	Yes	539.772	2114.33	1327.05	-3.91708	2.13126e-08	Yes
ENSG00000076043	25996	REXO2	RNA exonuclease 2	260.911	214.06	237.486	1.21887	0.371725	No	467.035	326.929	396.982	1.42855	0.000529584	No
ENSG00000076053	10179	RBM7	RNA binding motif protein 7	102.352	367.38	234.866	-3.58937	0.000100774	Yes	169.352	439.916	304.634	-2.59764	4.06743e-08	Yes
ENSG00000076067	5939	RBMS2	RNA binding motif single stranded interacting protein 2	101.638	92.4547	97.0465	1.09933	0.785163	No	119.464	178.156	148.81	-1.49129	0.043623	No
ENSG00000076108	11176	BAZ2A	bromodomain adjacent to zinc finger domain 2A	1287.09	2203.04	1745.06	-1.71165	0.0450192	No	1843.81	3444.27	2644.04	-1.86802	9.59603e-06	No
ENSG00000076201	25930	PTPN23	protein tyrosine phosphatase non-receptor type 23	1955.67	2028.02	1991.84	-1.037	0.915239	No	1597.48	2135.39	1866.43	-1.33672	0.0138951	No
ENSG00000076242	4292	MLH1	mutL homolog 1	578.21	865.64	721.925	-1.4971	0.0130625	No	820.62	1321.87	1071.25	-1.61082	7.78258e-07	No
ENSG00000076248	7374	UNG	uracil DNA glycosylase	404.918	1475.63	940.275	-3.64427	1.04574e-06	Yes	580.623	1547.1	1063.86	-2.66454	2.70463e-07	Yes
ENSG00000076258	2329	FMO4	flavin containing monooxygenase 4	15.6476	2.28575	8.96666	6.8457	0.000606818	Yes	24.9172	11.3895	18.1534	2.18773	0.0123159	Yes
ENSG00000076321	27252	KLHL20	kelch like family member 20	280.231	713.536	496.883	-2.54624	4.30864e-05	Yes	333.136	713.077	523.107	-2.14049	7.5463e-07	Yes
ENSG00000076344	8786	RGS11	regulator of G protein signaling 11	694.22	91.5669	392.893	7.58156	0.00141757	Yes	3004.91	479.408	1742.16	6.26796	4.07125e-08	Yes
ENSG00000076351	113235	SLC46A1	solute carrier family 46 member 1	67.2715	55.9035	61.5875	1.20335	0.54473	No	344.189	283.552	313.87	1.21385	0.232628	No
ENSG00000076356	5362	PLXNA2	plexin A2	2899.22	7610.35	5254.78	-2.62496	0.0104952	Yes	3365.9	8883.36	6124.63	-2.63922	0.000262277	Yes
ENSG00000076382	10615	SPAG5	sperm associated antigen 5	146.124	203.254	174.689	-1.39097	0.582814	No	415.075	1327.92	871.498	-3.19923	0.00188419	Yes
ENSG00000076513	88455	ANKRD13A	ankyrin repeat domain 13A	677.183	494.728	585.955	1.3688	0.0420756	No	729.2	913.691	821.445	-1.253	0.0800144	No
ENSG00000076554	7163	TPD52	tumor protein D52	3556.55	347.286	1951.92	10.241	1.40001e-07	Yes	5128.14	371.087	2749.61	13.8192	2.09886e-16	Yes
ENSG00000076555	32	ACACB	acetyl-CoA carboxylase beta	338.098	89.3713	213.735	3.78307	0.00563597	Yes	752.431	323.052	537.742	2.32913	0.000122274	Yes
ENSG00000076604	9618	TRAF4	TNF receptor associated factor 4	273.905	2189.89	1231.9	-7.99509	3.13096e-11	Yes	402.615	2067.96	1235.29	-5.13632	2.13366e-13	Yes
ENSG00000076641	55824	PAG1	phosphoprotein membrane anchor with glycosphingolipid microdomains 1	360.637	713.738	537.188	-1.9791	0.00972889	No	436.818	963.529	700.173	-2.20579	0.000278895	Yes
ENSG00000076650	55094	GPATCH1	G-patch domain containing 1	252.305	410.875	331.59	-1.62848	0.00247893	No	337.409	537.402	437.406	-1.59273	3.34184e-07	No
ENSG00000076662	3385	ICAM3	intercellular adhesion molecule 3	180.423	123.244	151.833	1.46395	0.080107	No	66.0153	25.7093	45.8623	2.56776	1.38869e-05	Yes
ENSG00000076685	22978	NT5C2	5'-nucleotidase, cytosolic II	394.664	1125.17	759.919	-2.85097	5.27145e-06	Yes	1657.74	3120.33	2389.03	-1.88228	3.32325e-06	No
ENSG00000076706	4162	MCAM	melanoma cell adhesion molecule	1480.56	531.958	1006.26	2.78323	0.00724687	Yes	1468.03	1109.93	1288.98	1.32263	0.219914	No
ENSG00000076716	2239	GPC4	glypican 4	249.328	829.812	539.57	-3.3282	0.0456179	Yes	313.906	1965.56	1139.73	-6.26162	0.000659079	Yes
ENSG00000076770	55796	MBNL3	muscleblind like splicing regulator 3	55.2289	58.7331	56.981	-1.06345	0.909279	No	49.5588	191.936	120.748	-3.8729	0.00105938	Yes
ENSG00000076826	57662	CAMSAP3	calmodulin regulated spectrin associated protein family member 3	1001.55	2760	1880.78	-2.75571	0.00256602	Yes	906.621	3240.55	2073.59	-3.57432	3.7649e-08	Yes
ENSG00000076864	5909	RAP1GAP	RAP1 GTPase activating protein	6902.15	1145.05	4023.6	6.02782	9.26674e-09	Yes	10649.2	1552.18	6100.71	6.86084	5.7772e-11	Yes
ENSG00000076924	56949	XAB2	XPA binding protein 2	1100.78	2013.15	1556.96	-1.82884	0.000261994	No	1183.4	1787.25	1485.32	-1.51027	0.00327602	No
ENSG00000076928	9138	ARHGEF1	Rho guanine nucleotide exchange factor 1	512.374	331.585	421.979	1.54523	0.237084	No	1101.75	1248.18	1174.96	-1.13291	0.458629	No
ENSG00000076944	6813	STXBP2	syntaxin binding protein 2	42.564	53.9968	48.2804	-1.2686	0.466687	No	64.5723	81.5017	73.037	-1.26218	0.208549	No
ENSG00000076984	5609	MAP2K7	mitogen-activated protein kinase kinase 7	661.427	567.145	614.286	1.16624	0.354559	No	854.695	1046.51	950.602	-1.22442	0.0991321	No
ENSG00000077009	27231	NMRK2	nicotinamide riboside kinase 2	7.03392	0.693805	3.86386	10.1382	3.66207e-05	Yes	11.5078	1.14848	6.32813	10.02	2.80565e-09	Yes
ENSG00000077044	8527	DGKD	diacylglycerol kinase delta	653.696	4207.08	2430.39	-6.43584	9.74084e-07	Yes	799.472	3329.41	2064.44	-4.16451	9.31218e-13	Yes
ENSG00000077063	83992	CTTNBP2	cortactin binding protein 2	755.391	3855.65	2305.52	-5.10418	0.000261022	Yes	900.662	3029.94	1965.3	-3.36413	0.000169991	Yes
ENSG00000077080	51412	ACTL6B	actin like 6B	1458.22	3242.7	2350.46	-2.22374	0.00322544	Yes	2121.94	2524.58	2323.26	-1.18975	0.173093	No
ENSG00000077092	5915	RARB	retinoic acid receptor beta	607.752	84.9608	346.357	7.15333	1.80013e-07	Yes	605.943	126.35	366.147	4.79576	0.00181708	Yes
ENSG00000077097	7155	TOP2B	DNA topoisomerase II beta	3735.85	18615	11175.4	-4.98282	2.9594e-08	Yes	5429.4	18583	12006.2	-3.42266	6.01048e-14	Yes
ENSG00000077147	56889	TM9SF3	transmembrane 9 superfamily member 3	3156.34	3667.92	3412.13	-1.16208	0.504542	No	3761.46	3750.46	3755.96	1.00293	0.983102	No
ENSG00000077150	4791	NFKB2	nuclear factor kappa B subunit 2	83.095	53.5058	68.3004	1.55301	0.310389	No	106.665	164.835	135.75	-1.54536	0.184406	No
ENSG00000077152	29089	UBE2T	ubiquitin conjugating enzyme E2 T	267.396	484.908	376.152	-1.81344	0.0579697	No	364.565	859.277	611.921	-2.35699	0.0005876	Yes
ENSG00000077157	4660	PPP1R12B	protein phosphatase 1 regulatory subunit 12B	3006.04	1169.24	2087.64	2.57094	0.000590927	Yes	3102.37	1907.97	2505.17	1.62601	0.000602751	No
ENSG00000077232	54431	DNAJC10	DnaJ heat shock protein family (Hsp40) member C10	1183.79	1194.39	1189.09	-1.00895	0.965446	No	2192.79	2178.49	2185.64	1.00656	0.956382	No
ENSG00000077235	2975	GTF3C1	general transcription factor IIIC subunit 1	2675.42	3416.64	3046.03	-1.27705	0.205053	No	2759.69	3887.23	3323.46	-1.40857	0.000119141	No
ENSG00000077238	3566	IL4R	interleukin 4 receptor	99.5698	81.6115	90.5906	1.22005	0.411611	No	210.306	104.202	157.254	2.01826	0.000280853	Yes
ENSG00000077254	23032	USP33	ubiquitin specific peptidase 33	2796.82	3572.24	3184.53	-1.27725	0.275985	No	3332.76	3585.26	3459.01	-1.07576	0.523755	No
ENSG00000077264	5063	PAK3	p21 (RAC1) activated kinase 3	3181.58	2675.85	2928.71	1.189	0.480722	No	3753.16	2614.61	3183.88	1.43546	0.0419551	No
ENSG00000077274	827	CAPN6	calpain 6	0.743683	7.67323	4.20846	-10.3179	6.13561e-05	Yes	1.91611	22.5804	12.2483	-11.7845	3.73227e-05	Yes
ENSG00000077279	1641	DCX	doublecortin	388.678	42494.5	21441.6	-109.331	5.3999e-12	Yes	466.039	28152.5	14309.3	-60.4081	1.09607e-12	Yes
ENSG00000077312	6626	SNRPA	small nuclear ribonucleoprotein polypeptide A	424.41	1194.91	809.658	-2.81545	4.02467e-05	Yes	725.68	1973.33	1349.51	-2.71929	3.42832e-07	Yes
ENSG00000077327	9576	SPAG6	sperm associated antigen 6	73.3129	1.00473	37.1588	72.9675	4.6883e-08	Yes	102.242	10.8549	56.5485	9.41902	0.000635194	Yes
ENSG00000077348	56915	EXOSC5	exosome component 5	423.404	597.58	510.492	-1.41137	0.0876133	No	427.074	373.014	400.044	1.14493	0.459958	No
ENSG00000077380	1781	DYNC1I2	dynein cytoplasmic 1 intermediate chain 2	2089.18	5251.14	3670.16	-2.51349	2.1933e-05	Yes	3031.63	5994.33	4512.98	-1.97726	3.84297e-07	No
ENSG00000077420	54518	APBB1IP	amyloid beta precursor protein binding family B member 1 interacting protein	102.692	27.3359	65.0137	3.75666	0.00141616	Yes	113.51	29.7893	71.6498	3.81044	7.35465e-05	Yes
ENSG00000077454	4034	LRCH4	leucine rich repeats and calponin homology domain containing 4	478.911	306.789	392.85	1.56104	0.200756	No	908.394	1430.34	1169.37	-1.57458	0.0057535	No
ENSG00000077458	143684	FAM76B	family with sequence similarity 76 member B	126.403	815.316	470.86	-6.45015	4.06522e-07	Yes	303.619	1106.43	705.025	-3.64414	5.08812e-09	Yes
ENSG00000077463	51548	SIRT6	sirtuin 6	260.898	709.07	484.984	-2.71781	1.18686e-05	Yes	334.449	743.937	539.193	-2.22437	0.000117767	Yes
ENSG00000077514	10714	POLD3	DNA polymerase delta 3, accessory subunit	185.387	607.845	396.616	-3.27879	1.13369e-05	Yes	308.048	974.025	641.036	-3.16193	4.58236e-09	Yes
ENSG00000077522	88	ACTN2	actinin alpha 2	2393.14	230.482	1311.81	10.3832	0.00110356	Yes	2867.58	566.367	1716.97	5.06311	0.00555743	Yes
ENSG00000077549	832	CAPZB	capping actin protein of muscle Z-line subunit beta	4098.94	3324.67	3711.8	1.23289	0.0941722	No	5552.26	3944.01	4748.13	1.40777	3.48319e-05	No
ENSG00000077585	7107	GPR137B	G protein-coupled receptor 137B	638	341.987	489.994	1.86557	0.000171437	No	656.884	566.086	611.485	1.1604	0.241477	No
ENSG00000077616	10003	NAALAD2	N-acetylated alpha-linked acidic dipeptidase 2	94.959	25.0245	59.9917	3.79465	0.000315409	Yes	280.12	97.0191	188.569	2.88726	0.0807838	No
ENSG00000077684	79960	JADE1	jade family PHD finger 1	799.402	1638.23	1218.82	-2.04932	0.000274944	Yes	938.022	1950.03	1444.02	-2.07887	7.14075e-08	Yes
ENSG00000077713	203427	SLC25A43	solute carrier family 25 member 43	70.3314	23.1789	46.7551	3.03429	0.0351899	Yes	130.747	69.8634	100.305	1.87147	0.000217052	No
ENSG00000077721	7319	UBE2A	ubiquitin conjugating enzyme E2 A	1095.8	1200.48	1148.14	-1.09552	0.647319	No	1309.62	1592.91	1451.26	-1.21631	0.00621089	No
ENSG00000077782	2260	FGFR1	fibroblast growth factor receptor 1	1227.9	1307.86	1267.88	-1.06512	0.859547	No	1500.81	2288.58	1894.69	-1.5249	0.0637238	No
ENSG00000077809	---	---	---	818.687	1746.13	1282.41	-2.13284	0.00196873	Yes	916.613	2552.78	1734.7	-2.78502	4.3304e-05	Yes
ENSG00000077935	27127	SMC1B	structural maintenance of chromosomes 1B	3.21304	3.57918	3.39611	-1.11395	0.802218	No	2.89453	2.60243	2.74848	1.11224	0.827243	No
ENSG00000077942	2192	FBLN1	fibulin 1	547.173	4339.15	2443.16	-7.93013	8.56935e-11	Yes	392.538	3393.32	1892.93	-8.64458	1.16312e-10	Yes
ENSG00000077943	8516	ITGA8	integrin subunit alpha 8	133.357	40.9135	87.1353	3.25948	0.0452418	Yes	182.736	64.4077	123.572	2.83718	0.00814051	Yes
ENSG00000077984	8530	CST7	cystatin F	4.73877	1.06626	2.90251	4.44428	0.00521541	Yes	6.41196	0.886669	3.64931	7.23151	7.61285e-07	Yes
ENSG00000078018	4133	MAP2	microtubule associated protein 2	32632	40365	36498.5	-1.23698	0.397936	No	30066.5	32763	31414.7	-1.08969	0.558779	No
ENSG00000078043	9063	PIAS2	protein inhibitor of activated STAT 2	801.169	767.469	784.319	1.04391	0.806684	No	1135.48	1120.66	1128.07	1.01323	0.91086	No
ENSG00000078053	273	AMPH	amphiphysin	4907.58	2194.67	3551.13	2.23614	0.000207459	Yes	5125.74	1983.34	3554.54	2.58439	5.04489e-07	Yes
ENSG00000078061	369	ARAF	A-Raf proto-oncogene, serine/threonine kinase	373.278	395.432	384.355	-1.05935	0.851183	No	461.169	778.801	619.985	-1.68875	0.0010928	No
ENSG00000078070	56922	MCCC1	methylcrotonoyl-CoA carboxylase 1	663.759	615.864	639.812	1.07777	0.583069	No	1128.48	894.835	1011.66	1.26111	0.000828782	No
ENSG00000078081	27074	LAMP3	lysosomal associated membrane protein 3	0.822574	0.727532	0.775053	1.13063	0.740937	No	4.72145	1.91315	3.3173	2.46789	0.0375884	Yes
ENSG00000078098	2191	FAP	fibroblast activation protein alpha	39.6991	15.9552	27.8272	2.48816	0.167899	No	84.3514	74.437	79.3942	1.13319	0.753421	No
ENSG00000078114	10529	NEBL	nebulette	3421.84	223.583	1822.71	15.3046	3.1556e-05	Yes	4108.93	358.54	2233.73	11.4602	2.62325e-11	Yes
ENSG00000078124	55331	ACER3	alkaline ceramidase 3	1074.56	525.415	799.986	2.04516	0.000228738	Yes	1046.19	782.398	914.296	1.33716	0.0489554	No
ENSG00000078140	3093	UBE2K	ubiquitin conjugating enzyme E2 K	3717.46	4360.26	4038.86	-1.17291	0.53443	No	4062.4	3525.45	3793.93	1.15231	0.237937	No
ENSG00000078142	5289	PIK3C3	phosphatidylinositol 3-kinase catalytic subunit type 3	729.154	1020.23	874.69	-1.39919	0.119594	No	1343.77	1363.73	1353.75	-1.01485	0.894503	No
ENSG00000078177	55728	N4BP2	NEDD4 binding protein 2	44.4506	828.648	436.549	-18.642	2.395e-09	Yes	72.4806	928.535	500.508	-12.8108	4.30174e-11	Yes
ENSG00000078237	57103	TIGAR	TP53 induced glycolysis regulatory phosphatase	252.111	226.449	239.28	1.11332	0.716982	No	254.076	226.03	240.053	1.12408	0.415575	No
ENSG00000078246	7289	TULP3	TUB like protein 3	220.661	437.876	329.268	-1.98438	0.019317	No	361.024	968.807	664.916	-2.6835	5.19506e-07	Yes
ENSG00000078269	8871	SYNJ2	synaptojanin 2	2540.84	257.11	1398.97	9.88229	5.32957e-05	Yes	2251.43	228.765	1240.1	9.84165	2.21918e-08	Yes
ENSG00000078295	108	ADCY2	adenylate cyclase 2	4473.51	1214.29	2843.9	3.68405	0.000430775	Yes	4848.17	745.82	2797	6.50046	1.34595e-09	Yes
ENSG00000078304	5527	PPP2R5C	protein phosphatase 2 regulatory subunit B'gamma	3797.44	3198.52	3497.98	1.18725	0.236955	No	4590.23	3245.04	3917.64	1.41454	5.45607e-05	No
ENSG00000078319	---	---	---	124.269	113.556	118.912	1.09434	0.727657	No	225.012	155.348	190.18	1.44844	0.000452801	No
ENSG00000078328	54715	RBFOX1	RNA binding fox-1 homolog 1	6570.01	5302.13	5936.07	1.23913	0.57795	No	7788.97	3687.66	5738.31	2.11217	0.00233866	Yes
ENSG00000078369	2782	GNB1	G protein subunit beta 1	26168.3	31181.5	28674.9	-1.19158	0.269412	No	23705.2	21958	22831.6	1.07957	0.496471	No
ENSG00000078401	1906	EDN1	endothelin 1	93.3231	45.2878	69.3055	2.06067	0.0426673	Yes	225.889	174.129	200.009	1.29725	0.277889	No
ENSG00000078403	8028	MLLT10	MLLT10 histone lysine methyltransferase DOT1L cofactor	313.454	870.467	591.96	-2.77702	9.85948e-05	Yes	736.019	1599.08	1167.55	-2.17261	9.34456e-08	Yes
ENSG00000078487	55063	ZCWPW1	zinc finger CW-type and PWWP domain containing 1	137.499	45.7445	91.6219	3.00581	0.000143067	Yes	245.793	107.669	176.731	2.28285	3.8936e-06	Yes
ENSG00000078549	117	ADCYAP1R1	ADCYAP receptor type I	2511.54	3744.43	3127.99	-1.49089	0.0781043	No	2696.24	3330.69	3013.46	-1.23531	0.339358	No
ENSG00000078579	26281	FGF20	fibroblast growth factor 20	4.63426	0.69677	2.66551	6.65106	1.90731e-05	Yes	18.2474	1.17136	9.70936	15.578	2.7504e-10	Yes
ENSG00000078596	9452	ITM2A	integral membrane protein 2A	1563.98	1485.37	1524.68	1.05292	0.868476	No	1368.49	1445.18	1406.83	-1.05604	0.742016	No
ENSG00000078618	4898	NRDC	nardilysin convertase	3177.73	3689.81	3433.77	-1.16115	0.31531	No	4779.99	4827.74	4803.86	-1.00999	0.880268	No
ENSG00000078668	7419	VDAC3	voltage dependent anion channel 3	3402.58	3529.07	3465.82	-1.03717	0.862975	No	5588.93	4092.35	4840.64	1.3657	0.000474653	No
ENSG00000078674	5108	PCM1	pericentriolar material 1	2150.4	4289.01	3219.71	-1.99451	0.00232059	No	2906.96	5696.95	4301.95	-1.95976	5.64918e-06	No
ENSG00000078687	57690	TNRC6C	trinucleotide repeat containing adaptor 6C	892.787	1285.23	1089.01	-1.43957	0.366924	No	1182.85	1624.22	1403.54	-1.37313	0.0568204	No
ENSG00000078699	9139	CBFA2T2	CBFA2/RUNX1 translocation partner 2	997.943	1478.25	1238.09	-1.48129	0.0892344	No	1266.57	2747.37	2006.97	-2.16914	2.8335e-11	Yes
ENSG00000078725	1620	BRINP1	BMP/retinoic acid inducible neural specific 1	3362.71	1111.16	2236.93	3.02632	0.00386381	Yes	3691.02	1151.73	2421.37	3.20477	3.95512e-06	Yes
ENSG00000078747	83737	ITCH	itchy E3 ubiquitin protein ligase	1634.45	1166.59	1400.52	1.40105	0.0636696	No	1474.68	1477.9	1476.29	-1.00218	0.988522	No
ENSG00000078795	27039	PKD2L2	polycystin 2 like 2, transient receptor potential cation channel	2.39829	1.09957	1.74893	2.18111	0.102276	No	2.03862	0.954666	1.49664	2.13542	0.0173375	Yes
ENSG00000078804	58476	TP53INP2	tumor protein p53 inducible nuclear protein 2	7548.8	1141.51	4345.16	6.61297	1.0867e-07	Yes	4309.19	1440.37	2874.78	2.99172	4.59632e-07	Yes
ENSG00000078808	51150	SDF4	stromal cell derived factor 4	1721.78	1678.34	1700.06	1.02588	0.865824	No	2591.66	2431.54	2511.6	1.06585	0.603661	No
ENSG00000078814	57644	MYH7B	myosin heavy chain 7B	469.593	10.4776	240.036	44.8187	1.88949e-08	Yes	563.368	32.8951	298.132	17.1262	1.14376e-14	Yes
ENSG00000078900	7161	TP73	tumor protein p73	14.6326	103.663	59.148	-7.08443	0.000182249	Yes	6.60088	99.3022	52.9515	-15.0438	7.69553e-11	Yes
ENSG00000078902	54472	TOLLIP	toll interacting protein	9844.12	1693.74	5768.93	5.81206	2.24092e-09	Yes	9479.13	1322.65	5400.89	7.16677	1.56175e-15	Yes
ENSG00000078967	51619	UBE2D4	ubiquitin conjugating enzyme E2 D4 (putative)	646.456	426.401	536.429	1.51607	0.0268698	No	1210.9	553.601	882.249	2.18731	9.50354e-08	Yes
ENSG00000079101	27098	CLUL1	clusterin like 1	97.3515	40.9173	69.1344	2.37922	0.010307	Yes	152.025	103.331	127.678	1.47124	0.227476	No
ENSG00000079102	862	RUNX1T1	RUNX1 translocation partner 1	726.375	2401.67	1564.02	-3.30638	0.0065219	Yes	810.017	4742.02	2776.02	-5.85422	4.06237e-07	Yes
ENSG00000079134	9984	THOC1	THO complex 1	174.179	378.464	276.322	-2.17285	0.00546147	Yes	820.74	1807.46	1314.1	-2.20223	6.17067e-05	Yes
ENSG00000079150	51661	FKBP7	FKBP prolyl isomerase 7	27.8181	229.372	128.595	-8.24541	1.07144e-07	Yes	46.5237	237.513	142.018	-5.10519	1.89301e-13	Yes
ENSG00000079156	114880	OSBPL6	oxysterol binding protein like 6	821.769	813.889	817.829	1.00968	0.966726	No	1105.2	1019.58	1062.39	1.08398	0.674071	No
ENSG00000079215	6507	SLC1A3	solute carrier family 1 member 3	7050.17	1375.07	4212.62	5.12713	0.00881978	Yes	12970.6	4070.52	8520.57	3.18648	0.0184873	Yes
ENSG00000079246	7520	XRCC5	X-ray repair cross complementing 5	4485.82	15208	9846.91	-3.39024	2.04837e-06	Yes	4625.41	11829.9	8227.64	-2.55759	6.91281e-12	Yes
ENSG00000079257	56925	LXN	latexin	23.5917	46.7325	35.1621	-1.98089	0.0816812	No	48.1265	87.3212	67.7239	-1.81441	0.00437379	No
ENSG00000079263	11262	SP140	SP140 nuclear body protein	15.9599	3.86547	9.91267	4.12883	0.0045287	Yes	17.949	10.9828	14.4659	1.63428	0.13211	No
ENSG00000079277	8569	MKNK1	MAPK interacting serine/threonine kinase 1	398.992	204.691	301.842	1.94924	0.000921161	No	1100.71	446.382	773.547	2.46585	8.76758e-10	Yes
ENSG00000079308	7145	TNS1	tensin 1	1379.08	255.351	817.216	5.40073	6.40349e-05	Yes	1022.98	462.614	742.795	2.21129	0.00428017	Yes
ENSG00000079313	57455	REXO1	RNA exonuclease 1 homolog	1446.43	836.817	1141.62	1.72849	0.0301139	No	1321.54	1167.04	1244.29	1.13238	0.415504	No
ENSG00000079332	56681	SAR1A	secretion associated Ras related GTPase 1A	2095.96	2871.37	2483.66	-1.36995	0.037007	No	2601.77	2983.16	2792.46	-1.14659	0.0700564	No
ENSG00000079335	8556	CDC14A	cell division cycle 14A	44.7852	38.7609	41.7731	1.15542	0.82932	No	94.6783	159.039	126.858	-1.67978	0.19124	No
ENSG00000079337	10411	RAPGEF3	Rap guanine nucleotide exchange factor 3	743.251	120.116	431.684	6.18776	3.8961e-06	Yes	1745.58	329.171	1037.37	5.30295	1.39521e-09	Yes
ENSG00000079385	634	CEACAM1	carcinoembryonic antigen related cell adhesion molecule 1	9.45587	1.41282	5.43434	6.69292	0.00047429	Yes	5.06425	2.78659	3.92542	1.81737	0.155298	No
ENSG00000079387	29843	SENP1	SUMO specific peptidase 1	155.003	639.722	397.363	-4.12716	1.42575e-07	Yes	238.569	741.071	489.82	-3.10632	3.02917e-12	Yes
ENSG00000079393	51207	DUSP13	dual specificity phosphatase 13	5.09272	0.760269	2.92649	6.69858	5.31605e-05	Yes	7.78914	0.823038	4.30609	9.46389	5.4597e-09	Yes
ENSG00000079432	23152	CIC	capicua transcriptional repressor	2941.42	3333.45	3137.44	-1.13328	0.727572	No	2286.05	5956.21	4121.13	-2.60546	6.62043e-08	Yes
ENSG00000079435	3991	LIPE	lipase E, hormone sensitive type	529.485	325.828	427.657	1.62504	0.038261	No	345.583	382.379	363.981	-1.10647	0.657132	No
ENSG00000079459	2222	FDFT1	farnesyl-diphosphate farnesyltransferase 1	3405.13	7653.13	5529.13	-2.24753	0.000197019	Yes	3800.11	8879.59	6339.85	-2.33667	2.1013e-07	Yes
ENSG00000079462	5050	PAFAH1B3	platelet activating factor acetylhydrolase 1b catalytic subunit 3	359.1	5525.84	2942.47	-15.388	1.19318e-11	Yes	508.634	4674.55	2591.59	-9.1904	1.89301e-13	Yes
ENSG00000079482	4983	OPHN1	oligophrenin 1	492.717	1228.34	860.531	-2.493	0.00131197	Yes	669.253	995.665	832.459	-1.48773	0.0885131	No
ENSG00000079616	3835	KIF22	kinesin family member 22	476.585	1015.99	746.289	-2.13182	0.0445349	Yes	676.738	2572.44	1624.59	-3.80124	1.37532e-05	Yes
ENSG00000079689	10590	SCGN	secretagogin, EF-hand calcium binding protein	22.7613	150.934	86.8478	-6.63117	0.00049915	Yes	34.0166	84.3276	59.1721	-2.47901	0.00048081	Yes
ENSG00000079691	55604	CARMIL1	capping protein regulator and myosin 1 linker 1	454.547	438.993	446.77	1.03543	0.908556	No	803.626	537.802	670.714	1.49428	0.018477	No
ENSG00000079739	5236	PGM1	phosphoglucomutase 1	1142.09	522.204	832.146	2.18705	0.0170107	Yes	1509.42	594.455	1051.94	2.53917	3.94248e-06	Yes
ENSG00000079785	1653	DDX1	DEAD-box helicase 1	3555.61	3688.65	3622.13	-1.03742	0.850251	No	4568.48	3763.35	4165.91	1.21394	0.00287116	No
ENSG00000079805	1785	DNM2	dynamin 2	1604.37	1904.56	1754.46	-1.18711	0.355153	No	1814.65	2320.01	2067.33	-1.27849	0.014085	No
ENSG00000079819	2037	EPB41L2	erythrocyte membrane protein band 4.1 like 2	3711.95	430.079	2071.02	8.63087	1.42702e-07	Yes	5077.17	1070.45	3073.81	4.74302	2.14711e-15	Yes
ENSG00000079841	22999	RIMS1	regulating synaptic membrane exocytosis 1	4134.33	682.971	2408.65	6.05344	6.37502e-06	Yes	3749.35	798.86	2274.11	4.69338	2.34184e-06	Yes
ENSG00000079931	26002	MOXD1	monooxygenase DBH like 1	409.585	562.287	485.936	-1.37282	0.363308	No	501.494	384.789	443.142	1.30329	0.676965	No
ENSG00000079950	8417	STX7	syntaxin 7	1934.37	4464.04	3199.2	-2.30775	0.00203066	Yes	2008.43	3034.9	2521.67	-1.51108	0.0393891	No
ENSG00000079974	11158	RABL2B	RAB, member of RAS oncogene family like 2B	380.367	549.739	465.053	-1.44528	0.0250886	No	922.422	1048.82	985.622	-1.13703	0.220749	No
ENSG00000079999	9817	KEAP1	kelch like ECH associated protein 1	1487.91	1676.49	1582.2	-1.12675	0.495855	No	1571.5	1221.8	1396.65	1.28621	0.0489675	No
ENSG00000080007	55510	DDX43	DEAD-box helicase 43	1.93176	2.94814	2.43995	-1.52614	0.428264	No	10.9889	8.78805	9.8885	1.25044	0.653202	No
ENSG00000080031	5794	PTPRH	protein tyrosine phosphatase receptor type H	100.844	2.46171	51.6529	40.965	3.14903e-08	Yes	112.238	4.00648	58.122	28.014	6.88616e-11	Yes
ENSG00000080166	1638	DCT	dopachrome tautomerase	37.0792	20.9689	29.024	1.7683	0.491912	No	88.6968	60.6193	74.658	1.46318	0.561402	No
ENSG00000080189	51006	SLC35C2	solute carrier family 35 member C2	905.18	638.936	772.058	1.4167	0.0440998	No	1174.27	1015.72	1095	1.1561	0.188087	No
ENSG00000080200	131544	CRYBG3	crystallin beta-gamma domain containing 3	103.231	27.748	65.4896	3.7203	0.00400307	Yes	313.478	263.854	288.666	1.18807	0.589331	No
ENSG00000080224	285220	EPHA6	EPH receptor A6	156.686	94.0366	125.361	1.66622	0.127938	No	114.6	122.715	118.657	-1.07081	0.894069	No
ENSG00000080293	6344	SCTR	secretin receptor	6.50442	2.26179	4.38311	2.87579	0.116139	No	17.0851	3.31783	10.2015	5.14949	0.00354551	Yes
ENSG00000080298	5991	RFX3	regulatory factor X3	629.929	1874.98	1252.46	-2.9765	0.000106351	Yes	974.514	2320.49	1647.5	-2.38118	4.87493e-07	Yes
ENSG00000080345	55183	RIF1	replication timing regulatory factor 1	971.134	1596.18	1283.66	-1.64362	0.0309928	No	1251.27	2268.59	1759.93	-1.81303	0.000323962	No
ENSG00000080371	23011	RAB21	RAB21, member RAS oncogene family	1237.74	1249.08	1243.41	-1.00916	0.971653	No	1444.62	1369.31	1406.96	1.055	0.670551	No
ENSG00000080493	8671	SLC4A4	solute carrier family 4 member 4	1318	101.208	709.603	13.0227	3.19778e-05	Yes	1675.15	225.227	950.19	7.43763	7.10494e-07	Yes
ENSG00000080503	6595	SMARCA2	SWI/SNF related, matrix associated, actin dependent regulator of chromatin, subfamily a, member 2	5022.04	5248.14	5135.09	-1.04502	0.900015	No	6191.49	3573.08	4882.28	1.73282	0.0158333	No
ENSG00000080546	27244	SESN1	sestrin 1	1375.42	537.686	956.554	2.55804	0.000135935	Yes	1911.41	622.426	1266.92	3.0709	3.75455e-10	Yes
ENSG00000080561	11043	MID2	midline 2	128.324	53.2444	90.7841	2.41009	0.000690929	Yes	98.9187	58.4171	78.6679	1.69332	0.0815472	No
ENSG00000080572	139212	PIH1D3	PIH1 domain containing 3	0.569454	0.55476	0.562107	1.02649	0.937328	No	0.98074	0.939573	0.960157	1.04381	0.931416	No
ENSG00000080573	50509	COL5A3	collagen type V alpha 3 chain	718.852	41.0938	379.973	17.493	2.29756e-06	Yes	3118.44	133.715	1626.08	23.3216	5.15372e-13	Yes
ENSG00000080603	10847	SRCAP	Snf2 related CREBBP activator protein	2654.64	3358.97	3006.81	-1.26532	0.530964	No	2394.7	4809.8	3602.25	-2.00852	2.29967e-07	Yes
ENSG00000080608	9933	PUM3	pumilio RNA binding family member 3	143.885	405.996	274.941	-2.82167	5.20976e-06	Yes	242.393	506.584	374.489	-2.08993	8.27413e-09	Yes
ENSG00000080618	1361	CPB2	carboxypeptidase B2	1.67945	2.80615	2.2428	-1.67087	0.314408	No	2.70541	1.02108	1.86325	2.64957	0.0168958	Yes
ENSG00000080644	1136	CHRNA3	cholinergic receptor nicotinic alpha 3 subunit	3.3297	25.2843	14.307	-7.59356	0.00013065	Yes	13.6211	72.2439	42.9325	-5.30383	0.000492974	Yes
ENSG00000080709	3781	KCNN2	potassium calcium-activated channel subfamily N member 2	246.933	291.921	269.427	-1.18219	0.666743	No	441.37	284.007	362.689	1.55408	0.0669342	No
ENSG00000080802	4850	CNOT4	CCR4-NOT transcription complex subunit 4	693.461	1207.2	950.33	-1.74083	0.00665501	No	918.732	1118	1018.36	-1.21689	0.112815	No
ENSG00000080815	5663	PSEN1	presenilin 1	2014.13	2647.88	2331	-1.31466	0.150605	No	2014.5	2354.31	2184.4	-1.16868	0.240904	No
ENSG00000080819	1371	CPOX	coproporphyrinogen oxidase	577.557	340.118	458.837	1.69811	0.00299157	No	641.142	530.174	585.658	1.2093	0.101627	No
ENSG00000080822	56650	CLDND1	claudin domain containing 1	5169.47	942.309	3055.89	5.48596	1.05135e-08	Yes	4874.9	1789.55	3332.23	2.72409	5.05977e-06	Yes
ENSG00000080823	5891	MOK	MOK protein kinase	284.607	339.441	312.024	-1.19266	0.615255	No	811.589	819.642	815.615	-1.00992	0.957321	No
ENSG00000080824	3320	HSP90AA1	heat shock protein 90 alpha family class A member 1	36907	35308.6	36107.8	1.04527	0.823087	No	53008.6	36455.8	44732.2	1.45405	0.000412575	No
ENSG00000080839	5933	RBL1	RB transcriptional corepressor like 1	42.7145	194.283	118.499	-4.54842	9.77426e-05	Yes	59.3941	476.787	268.09	-8.02751	6.16265e-10	Yes
ENSG00000080845	22839	DLGAP4	DLG associated protein 4	3719.21	4205.09	3962.15	-1.13064	0.61447	No	3651.36	6839.17	5245.26	-1.87305	6.85433e-06	No
ENSG00000080854	22997	IGSF9B	immunoglobulin superfamily member 9B	230.652	128.902	179.777	1.78937	0.250994	No	169.2	146.355	157.778	1.15609	0.648167	No
ENSG00000080947	114819	CROCCP3	CROCC pseudogene 3	99.7051	66.4124	83.0587	1.5013	0.523686	No	287.102	498.533	392.817	-1.73643	0.000716868	No
ENSG00000080986	10403	NDC80	NDC80 kinetochore complex component	1.5576	98.6324	50.095	-63.3231	5.17125e-06	Yes	3.01652	569.968	286.492	-188.949	8.83257e-07	Yes
ENSG00000081014	23431	AP4E1	adaptor related protein complex 4 subunit epsilon 1	172.72	271.689	222.205	-1.573	0.0197675	No	281.546	440.183	360.865	-1.56345	7.75232e-05	No
ENSG00000081019	54665	RSBN1	round spermatid basic protein 1	550.651	2160.21	1355.43	-3.92301	2.89816e-05	Yes	571.183	1770.22	1170.7	-3.09921	1.21273e-09	Yes
ENSG00000081026	260425	MAGI3	membrane associated guanylate kinase, WW and PDZ domain containing 3	1008.64	1096.76	1052.7	-1.08737	0.651649	No	1108.19	1325.3	1216.75	-1.19592	0.219037	No
ENSG00000081041	2920	CXCL2	C-X-C motif chemokine ligand 2	5.72775	1.02197	3.37486	5.60464	0.00150945	Yes	26.4356	9.86666	18.1511	2.67929	0.0562031	No
ENSG00000081051	174	AFP	alpha fetoprotein	5.32442	0.631201	2.97781	8.43538	0.0001781	Yes	8.73064	43.227	25.9788	-4.95118	0.177785	No
ENSG00000081052	1286	COL4A4	collagen type IV alpha 4 chain	58.824	6.3681	32.596	9.23728	2.34767e-07	Yes	67.1953	5.8941	36.5447	11.4004	0.000124358	Yes
ENSG00000081059	6932	TCF7	transcription factor 7	39.1846	53.5774	46.381	-1.36731	0.421268	No	42.2552	79.3011	60.7782	-1.87672	0.0161362	No
ENSG00000081087	28962	OSTM1	osteoclastogenesis associated transmembrane protein 1	563.331	734.779	649.055	-1.30435	0.308995	No	756.929	626.798	691.863	1.20761	0.0929409	No
ENSG00000081138	1005	CDH7	cadherin 7	101.31	177.011	139.16	-1.74722	0.461159	No	77.8251	144.656	111.241	-1.85874	0.234744	No
ENSG00000081148	50939	IMPG2	interphotoreceptor matrix proteoglycan 2	7.11711	6.90842	7.01276	1.03021	0.957272	No	20.9819	43.3764	32.1792	-2.06733	0.00089849	Yes
ENSG00000081154	57092	PCNP	PEST proteolytic signal containing nuclear protein	2783.06	2149.01	2466.04	1.29505	0.303457	No	3820.02	3244.24	3532.13	1.17748	0.179233	No
ENSG00000081177	55218	EXD2	exonuclease 3'-5' domain containing 2	945.981	1322.83	1134.4	-1.39837	0.0305683	No	1074.03	1330.35	1202.19	-1.23865	0.0416421	No
ENSG00000081181	384	ARG2	arginase 2	201.598	843.142	522.37	-4.1823	6.40186e-06	Yes	555.189	1483.15	1019.17	-2.67143	1.64222e-08	Yes
ENSG00000081189	4208	MEF2C	myocyte enhancer factor 2C	11345.1	15277.7	13311.4	-1.34663	0.514451	No	14462	6207.52	10334.8	2.32975	0.114419	No
ENSG00000081237	5788	PTPRC	protein tyrosine phosphatase receptor type C	81.9316	19.1722	50.5519	4.27345	0.0106334	Yes	92.5359	23.6187	58.0773	3.9179	8.30078e-06	Yes
ENSG00000081248	779	CACNA1S	calcium voltage-gated channel subunit alpha1 S	64.6085	2.36915	33.4888	27.2708	7.07087e-09	Yes	69.772	3.55062	36.6613	19.6506	2.10398e-10	Yes
ENSG00000081277	5317	PKP1	plakophilin 1	51.9581	6.78092	29.3695	7.66239	2.74655e-05	Yes	106.094	5.68168	55.8879	18.673	6.88342e-09	Yes
ENSG00000081307	79876	UBA5	ubiquitin like modifier activating enzyme 5	915.898	1002.41	959.152	-1.09445	0.626019	No	1471.86	1610.24	1541.05	-1.09402	0.320601	No
ENSG00000081320	9262	STK17B	serine/threonine kinase 17b	56.8123	79.4245	68.1184	-1.39801	0.565506	No	99.3546	141.782	120.568	-1.42703	0.34164	No
ENSG00000081377	8555	CDC14B	cell division cycle 14B	494.634	132.766	313.7	3.7256	2.3485e-05	Yes	880.751	469.504	675.127	1.87592	0.00105593	No
ENSG00000081386	22869	ZNF510	zinc finger protein 510	274.233	727	500.617	-2.65103	7.31127e-05	Yes	336.499	535.131	435.815	-1.59029	0.0192003	No
ENSG00000081479	4036	LRP2	LDL receptor related protein 2	636.783	15.4506	326.117	41.2141	1.68442e-06	Yes	278.89	88.687	183.788	3.14465	0.122112	No
ENSG00000081665	440515	ZNF506	zinc finger protein 506	164.87	349.894	257.382	-2.12224	0.00016351	Yes	403.058	773.243	588.151	-1.91844	3.6144e-05	No
ENSG00000081692	65094	JMJD4	jumonji domain containing 4	181.875	172.278	177.077	1.05571	0.827645	No	450.104	315.539	382.822	1.42646	0.029895	No
ENSG00000081721	11266	DUSP12	dual specificity phosphatase 12	248.953	605.101	427.027	-2.43059	1.39665e-05	Yes	430.086	807.902	618.994	-1.87847	4.22978e-08	No
ENSG00000081760	65985	AACS	acetoacetyl-CoA synthetase	2477.86	1587.85	2032.85	1.56051	0.00168813	No	2808.23	1757.41	2282.82	1.59793	0.000452713	No
ENSG00000081791	9812	DELE1	DAP3 binding cell death enhancer 1	742.356	574.484	658.42	1.29221	0.241568	No	1176.03	1363.64	1269.84	-1.15953	0.0708928	No
ENSG00000081803	93664	CADPS2	calcium dependent secretion activator 2	2539.47	63.1153	1301.29	40.2354	6.06948e-12	Yes	2178.47	156.082	1167.28	13.9572	5.37489e-11	Yes
ENSG00000081818	56131	PCDHB4	protocadherin beta 4	228.325	157.766	193.045	1.44724	0.204936	No	231.002	176.378	203.69	1.3097	0.0868125	No
ENSG00000081842	56142	PCDHA6	protocadherin alpha 6	92.5409	124.594	108.567	-1.34637	0.441567	No	52.7955	61.8557	57.3256	-1.17161	0.65853	No
ENSG00000081853	56113	PCDHGA2	protocadherin gamma subfamily A, 2	59.3017	282.174	170.738	-4.75827	8.03952e-05	Yes	50.8996	186.146	118.523	-3.65712	0.00109022	Yes
ENSG00000081870	51668	HSPB11	heat shock protein family B (small) member 11	242.048	246.344	244.196	-1.01775	0.954759	No	512.677	472.593	492.635	1.08482	0.509014	No
ENSG00000081913	23239	PHLPP1	PH domain and leucine rich repeat protein phosphatase 1	1956.97	1379.45	1668.21	1.41866	0.374304	No	1833.87	2415.47	2124.67	-1.31714	0.174363	No
ENSG00000081923	5205	ATP8B1	ATPase phospholipid transporting 8B1	77.5648	30.8632	54.214	2.51318	0.0124915	Yes	131.898	32.175	82.0364	4.09938	5.31974e-08	Yes
ENSG00000081985	3595	IL12RB2	interleukin 12 receptor subunit beta 2	198.765	5.35108	102.058	37.1448	1.31974e-05	Yes	189.753	6.27403	98.0136	30.2442	2.1487e-06	Yes
ENSG00000082014	6604	SMARCD3	SWI/SNF related, matrix associated, actin dependent regulator of chromatin, subfamily d, member 3	2709.9	2902.84	2806.37	-1.0712	0.825616	No	3560.86	5586.12	4573.49	-1.56875	0.0126365	No
ENSG00000082068	55100	WDR70	WD repeat domain 70	355.823	964.958	660.391	-2.7119	1.04781e-06	Yes	588.766	1170.72	879.746	-1.98844	3.27551e-09	No
ENSG00000082074	2533	FYB1	FYN binding protein 1	24.3509	9.13266	16.7418	2.66635	0.0552941	No	56.5744	20.1352	38.3548	2.80972	0.0012963	Yes
ENSG00000082126	58538	MPP4	membrane palmitoylated protein 4	4.39992	1.10466	2.75229	3.98306	0.0146477	Yes	27.859	4.7322	16.2956	5.88711	7.52816e-08	Yes
ENSG00000082146	55437	STRADB	STE20 related adaptor beta	351.403	771.521	561.462	-2.19554	0.000675416	Yes	696.04	847.167	771.604	-1.21712	0.125733	No
ENSG00000082153	9689	BZW1	basic leucine zipper and W2 domains 1	1298.08	2956.64	2127.36	-2.27771	0.000694983	Yes	1685.5	3009.68	2347.59	-1.78563	5.73856e-07	No
ENSG00000082175	5241	PGR	progesterone receptor	27.7502	2.74207	15.2461	10.1202	4.56478e-05	Yes	39.8642	2.1739	21.0191	18.3376	2.15906e-10	Yes
ENSG00000082196	114899	C1QTNF3	C1q and TNF related 3	63.5841	73.7674	68.6757	-1.16015	0.617562	No	130.148	237.866	184.007	-1.82766	0.00705258	No
ENSG00000082212	4200	ME2	malic enzyme 2	821.837	1478.46	1150.15	-1.79897	0.00152625	No	1013.37	1480.52	1246.95	-1.46099	9.05873e-05	No
ENSG00000082213	55322	C5orf22	chromosome 5 open reading frame 22	646.141	530.567	588.354	1.21783	0.339428	No	872.206	677.443	774.825	1.2875	0.0166052	No
ENSG00000082258	905	CCNT2	cyclin T2	860.207	1513.62	1186.92	-1.7596	0.00414397	No	1415.16	3102.58	2258.87	-2.19238	5.27349e-07	Yes
ENSG00000082269	57579	FAM135A	family with sequence similarity 135 member A	492.065	1058.35	775.209	-2.15084	0.00447642	Yes	597.905	944.724	771.314	-1.58006	0.00299364	No
ENSG00000082293	1310	COL19A1	collagen type XIX alpha 1 chain	84.2268	76.5758	80.4013	1.09991	0.903985	No	59.8244	12.3627	36.0935	4.83911	0.00247218	Yes
ENSG00000082397	23136	EPB41L3	erythrocyte membrane protein band 4.1 like 3	7214.87	4691.83	5953.35	1.53775	0.222811	No	8161.05	4336.54	6248.79	1.88193	0.00454786	No
ENSG00000082438	22837	COBLL1	cordon-bleu WH2 repeat protein like 1	376.208	117.793	247.001	3.19379	9.92029e-05	Yes	487.693	269.318	378.506	1.81084	0.000669014	No
ENSG00000082458	1741	DLG3	discs large MAGUK scaffold protein 3	3333.77	3310.7	3322.24	1.00697	0.969489	No	3801.11	3757.09	3779.1	1.01172	0.912313	No
ENSG00000082482	3776	KCNK2	potassium two pore domain channel subfamily K member 2	312.368	770.764	541.566	-2.46749	0.023604	Yes	305.07	642.701	473.885	-2.10674	0.0668928	No
ENSG00000082497	56256	SERTAD4	SERTA domain containing 4	309.41	131.389	220.399	2.35492	0.0893062	No	299.685	557.351	428.518	-1.85979	0.112938	No
ENSG00000082512	7188	TRAF5	TNF receptor associated factor 5	173.364	66.4135	119.889	2.61038	0.0225505	Yes	447.134	312.951	380.043	1.42877	0.0818492	No
ENSG00000082515	29093	MRPL22	mitochondrial ribosomal protein L22	293.037	323.439	308.238	-1.10375	0.710736	No	565.198	456.417	510.808	1.23834	0.102667	No
ENSG00000082516	25929	GEMIN5	gem nuclear organelle associated protein 5	382.727	751.764	567.246	-1.96423	0.00130034	No	517.587	991.625	754.606	-1.91586	7.88858e-09	No
ENSG00000082556	4986	OPRK1	opioid receptor kappa 1	236.369	6.73783	121.554	35.0809	0.000513264	Yes	173.435	24.0228	98.7288	7.21958	0.0152498	Yes
ENSG00000082641	4779	NFE2L1	nuclear factor, erythroid 2 like 1	6976.04	3208.84	5092.44	2.17401	3.24796e-05	Yes	9646.33	4353.17	6999.75	2.21593	1.04147e-11	Yes
ENSG00000082684	54437	SEMA5B	semaphorin 5B	488.223	906.277	697.25	-1.85628	0.138949	No	745.831	2805.25	1775.54	-3.76124	0.00761439	Yes
ENSG00000082701	2932	GSK3B	glycogen synthase kinase 3 beta	3218.74	4889.27	4054	-1.519	0.0663545	No	3295.37	5110.84	4203.1	-1.55092	0.000995005	No
ENSG00000082781	3693	ITGB5	integrin subunit beta 5	529.858	155.972	342.915	3.39713	0.000361476	Yes	590.81	311.046	450.928	1.89943	0.0506237	No
ENSG00000082805	23085	ERC1	ELKS/RAB6-interacting/CAST family member 1	1285.91	5406.65	3346.28	-4.20452	0.000103714	Yes	1253.14	4020.38	2636.76	-3.20824	2.55136e-06	Yes
ENSG00000082898	7514	XPO1	exportin 1	2159.15	4441.52	3300.33	-2.05707	0.00178657	Yes	3473.2	8638.88	6056.04	-2.4873	1.02095e-08	Yes
ENSG00000082996	11342	RNF13	ring finger protein 13	1705.62	485.518	1095.57	3.51298	7.40755e-06	Yes	1853.34	661.992	1257.67	2.79964	9.16159e-10	Yes
ENSG00000083067	80036	TRPM3	transient receptor potential cation channel subfamily M member 3	777.028	290.069	533.548	2.67877	0.0934326	No	863.523	474.612	669.068	1.81943	0.119396	No
ENSG00000083093	79728	PALB2	partner and localizer of BRCA2	165.514	309.201	237.357	-1.86813	0.000618085	No	262.096	428.988	345.542	-1.63676	1.08748e-07	No
ENSG00000083097	23033	DOP1A	DOP1 leucine zipper like protein A	912.606	956.427	934.517	-1.04802	0.878793	No	2298.51	2188.87	2243.69	1.05009	0.775669	No
ENSG00000083099	57226	LYRM2	LYR motif containing 2	320.904	291.249	306.077	1.10182	0.629461	No	803.707	674.083	738.895	1.1923	0.0399	No
ENSG00000083123	594	BCKDHB	branched chain keto acid dehydrogenase E1 subunit beta	352.904	196.161	274.533	1.79905	0.0162106	No	454.384	394.203	424.293	1.15267	0.322424	No
ENSG00000083168	7994	KAT6A	lysine acetyltransferase 6A	969.722	3896.81	2433.27	-4.01848	5.25259e-06	Yes	919.626	3559.94	2239.78	-3.87107	8.34996e-09	Yes
ENSG00000083223	79670	TUT7	terminal uridylyl transferase 7	279.229	749.342	514.286	-2.68361	0.000205157	Yes	412.242	698.045	555.143	-1.69329	0.000644348	No
ENSG00000083290	9706	ULK2	unc-51 like autophagy activating kinase 2	2195.99	2593.56	2394.78	-1.18104	0.314968	No	2035.33	2815.15	2425.24	-1.38314	0.0181867	No
ENSG00000083307	79977	GRHL2	grainyhead like transcription factor 2	6.41403	1.85479	4.13441	3.45809	0.0231102	Yes	1.94115	1.14127	1.54121	1.70087	0.172563	No
ENSG00000083312	3842	TNPO1	transportin 1	1202.75	5720.75	3461.75	-4.75639	1.20943e-06	Yes	1413.81	6125.72	3769.76	-4.33278	6.47444e-10	Yes
ENSG00000083444	5351	PLOD1	procollagen-lysine,2-oxoglutarate 5-dioxygenase 1	1007.83	795.231	901.531	1.26734	0.11873	No	1234.7	960.587	1097.64	1.28536	0.0480136	No
ENSG00000083454	5026	P2RX5	purinergic receptor P2X 5	170.66	6.94617	88.8031	24.5689	1.52314e-05	Yes	311.263	40.1359	175.699	7.75522	2.93913e-08	Yes
ENSG00000083457	3682	ITGAE	integrin subunit alpha E	239.237	202.233	220.735	1.18298	0.527812	No	338.126	369.468	353.797	-1.09269	0.605661	No
ENSG00000083520	22894	DIS3	DIS3 homolog, exosome endoribonuclease and 3'-5' exoribonuclease	587.042	1231.99	909.517	-2.09865	0.00023749	Yes	939.46	1454.84	1197.15	-1.54859	5.79251e-05	No
ENSG00000083535	10464	PIBF1	progesterone immunomodulatory binding factor 1	148.257	500.26	324.259	-3.37428	0.000123015	Yes	270.395	670.39	470.393	-2.4793	9.76402e-09	Yes
ENSG00000083544	81550	TDRD3	tudor domain containing 3	234.1	861.052	547.576	-3.67813	4.4133e-06	Yes	442.474	898.068	670.271	-2.02965	1.18935e-08	Yes
ENSG00000083635	26747	NUFIP1	nuclear FMR1 interacting protein 1	151.872	267.018	209.445	-1.75818	0.00980508	No	222.575	345.955	284.265	-1.55433	0.0006188	No
ENSG00000083642	23047	PDS5B	PDS5 cohesin associated factor B	2238.62	2306.58	2272.6	-1.03036	0.911492	No	2073.23	2510.33	2291.78	-1.21083	0.123312	No
ENSG00000083720	5019	OXCT1	3-oxoacid CoA-transferase 1	4692.6	1368.63	3030.62	3.42868	4.85385e-08	Yes	5527.29	1630.03	3578.66	3.39091	1.07004e-12	Yes
ENSG00000083750	10325	RRAGB	Ras related GTP binding B	709.03	1028.13	868.579	-1.45005	0.0681015	No	1047.83	1056.12	1051.97	-1.00791	0.94695	No
ENSG00000083799	1540	CYLD	CYLD lysine 63 deubiquitinase	1862.77	721.163	1291.97	2.58301	3.03807e-05	Yes	2272.17	945.434	1608.8	2.40331	3.56081e-08	Yes
ENSG00000083807	10998	SLC27A5	solute carrier family 27 member 5	261.33	106.262	183.796	2.4593	0.00210334	Yes	366.842	81.9235	224.383	4.47786	3.01851e-10	Yes
ENSG00000083812	25799	ZNF324	zinc finger protein 324	343.608	491.022	417.315	-1.42902	0.0714296	No	389.277	423.453	406.365	-1.08779	0.559833	No
ENSG00000083814	79891	ZNF671	zinc finger protein 671	250.612	767.765	509.189	-3.06356	2.58726e-07	Yes	350.219	862.652	606.435	-2.46318	9.90872e-12	Yes
ENSG00000083817	55659	ZNF416	zinc finger protein 416	82.5427	273.537	178.04	-3.31389	1.18325e-06	Yes	115.243	223.166	169.204	-1.93649	6.67002e-06	No
ENSG00000083828	54807	ZNF586	zinc finger protein 586	59.1412	332.327	195.734	-5.61921	5.38165e-09	Yes	75.0779	404.84	239.959	-5.39226	1.66531e-13	Yes
ENSG00000083838	55663	ZNF446	zinc finger protein 446	170.797	304.035	237.416	-1.7801	0.0512949	No	423.825	857.096	640.46	-2.02229	2.08128e-06	Yes
ENSG00000083844	9422	ZNF264	zinc finger protein 264	113.172	368.871	241.021	-3.25939	6.38673e-05	Yes	53.2814	204.316	128.799	-3.83466	0.000650852	Yes
ENSG00000083845	6193	RPS5	ribosomal protein S5	4098.13	24410	14254.1	-5.95637	3.92789e-07	Yes	4035.3	12621.7	8328.5	-3.12782	1.93221e-08	Yes
ENSG00000083857	2195	FAT1	FAT atypical cadherin 1	895.593	542.843	719.218	1.64982	0.377685	No	1042.95	1991.08	1517.01	-1.90909	0.0818819	No
ENSG00000083896	91746	YTHDC1	YTH domain containing 1	1395.84	2602.16	1999	-1.86423	0.000133154	No	1989.92	3636.04	2812.98	-1.82723	2.08351e-09	No
ENSG00000083937	25978	CHMP2B	charged multivesicular body protein 2B	823.381	711.262	767.322	1.15763	0.577105	No	1148.28	858.02	1003.15	1.33829	0.0690214	No
ENSG00000084070	64744	SMAP2	small ArfGAP2	5298.63	2115.29	3706.96	2.50492	2.47615e-05	Yes	6045.8	1989.63	4017.71	3.03866	4.89305e-12	Yes
ENSG00000084072	10450	PPIE	peptidylprolyl isomerase E	678.708	573.875	626.292	1.18267	0.384993	No	1067.8	823.515	945.655	1.29663	0.0190125	No
ENSG00000084073	10269	ZMPSTE24	zinc metallopeptidase STE24	789.298	871.665	830.482	-1.10435	0.69575	No	965.319	952.852	959.086	1.01308	0.921403	No
ENSG00000084090	56910	STARD7	StAR related lipid transfer domain containing 7	4353.66	4693.77	4523.71	-1.07812	0.637689	No	5181.84	5141.52	5161.68	1.00784	0.921403	No
ENSG00000084092	84273	NOA1	nitric oxide associated 1	426.577	1308.27	867.422	-3.0669	1.27603e-07	Yes	436.882	892.268	664.575	-2.04235	2.00194e-08	Yes
ENSG00000084093	5978	REST	RE1 silencing transcription factor	114.222	298.226	206.224	-2.61093	0.0120406	Yes	121.57	703.293	412.431	-5.78508	5.69761e-08	Yes
ENSG00000084112	54434	SSH1	slingshot protein phosphatase 1	1139.18	999.561	1069.37	1.13968	0.557036	No	1188.08	1201.06	1194.57	-1.01092	0.936469	No
ENSG00000084207	2950	GSTP1	glutathione S-transferase pi 1	2251.25	4108.99	3180.12	-1.8252	0.00406546	No	2514.66	3798.24	3156.45	-1.51044	0.038825	No
ENSG00000084234	334	APLP2	amyloid beta precursor like protein 2	14815.2	6441.43	10628.3	2.29999	1.39638e-05	Yes	16931.4	6637.47	11784.5	2.55089	1.50379e-09	Yes
ENSG00000084444	57613	FAM234B	family with sequence similarity 234 member B	4126.25	1945.07	3035.66	2.12139	0.00278593	Yes	3872.94	1288.3	2580.62	3.00623	1.55012e-08	Yes
ENSG00000084453	6579	SLCO1A2	solute carrier organic anion transporter family member 1A2	1708.63	31.2009	869.916	54.7622	1.12282e-10	Yes	1541.27	36.9901	789.131	41.6671	1.70391e-12	Yes
ENSG00000084463	51729	WBP11	WW domain binding protein 11	1991.83	2458.66	2225.24	-1.23437	0.147365	No	2249.63	2398.59	2324.11	-1.06622	0.41581	No
ENSG00000084623	8668	EIF3I	eukaryotic translation initiation factor 3 subunit I	1764.25	3090.79	2427.52	-1.7519	0.00273229	No	2241.05	2526.07	2383.56	-1.12718	0.180025	No
ENSG00000084628	79570	NKAIN1	sodium/potassium transporting ATPase interacting 1	269.178	4684.76	2476.97	-17.404	1.46996e-11	Yes	317.525	4463.97	2390.75	-14.0587	1.99421e-15	Yes
ENSG00000084636	1307	COL16A1	collagen type XVI alpha 1 chain	849.131	114.683	481.907	7.40418	1.18269e-06	Yes	2869.56	523.87	1696.72	5.47762	1.86738e-07	Yes
ENSG00000084652	200081	TXLNA	taxilin alpha	1009.51	1069.79	1039.65	-1.05972	0.803932	No	1107.42	2008.96	1558.19	-1.81409	2.25073e-09	No
ENSG00000084674	338	APOB	apolipoprotein B	19.3607	3.90688	11.6338	4.95554	0.000995897	Yes	33.1287	19.396	26.2623	1.70802	0.281802	No
ENSG00000084676	8648	NCOA1	nuclear receptor coactivator 1	3115.85	4098.36	3607.11	-1.31533	0.265311	No	3665.79	3864.82	3765.3	-1.05429	0.804283	No
ENSG00000084693	60509	AGBL5	ATP/GTP binding protein like 5	585.46	1045.42	815.442	-1.78565	0.000434312	No	634.544	1209.24	921.894	-1.90569	1.35792e-07	No
ENSG00000084710	22979	EFR3B	EFR3 homolog B	1572.45	2596.22	2084.34	-1.65107	0.113275	No	680.748	1094.88	887.813	-1.60835	0.109687	No
ENSG00000084731	3797	KIF3C	kinesin family member 3C	14272.2	15090	14681.1	-1.0573	0.835278	No	12347.7	11015.4	11681.5	1.12095	0.50061	No
ENSG00000084733	10890	RAB10	RAB10, member RAS oncogene family	2839.67	6262.48	4551.07	-2.20536	0.00141616	Yes	3076.89	4649.55	3863.22	-1.51112	0.00205239	No
ENSG00000084734	2646	GCKR	glucokinase regulator	9.80425	5.81842	7.81133	1.68504	0.439318	No	40.2636	23.512	31.8878	1.71247	0.0171521	No
ENSG00000084754	3030	HADHA	hydroxyacyl-CoA dehydrogenase trifunctional multienzyme complex subunit alpha	2236.5	3616.34	2926.42	-1.61696	0.00431665	No	2753.89	3416.87	3085.38	-1.24074	0.0159842	No
ENSG00000084764	22924	MAPRE3	microtubule associated protein RP/EB family member 3	6417.65	3032.07	4724.86	2.11659	0.00275087	Yes	8399.01	2851.1	5625.06	2.94588	1.82641e-10	Yes
ENSG00000084774	790	CAD	carbamoyl-phosphate synthetase 2, aspartate transcarbamylase, and dihydroorotase	501.115	1069.8	785.456	-2.13483	0.00335683	Yes	789.46	1760.58	1275.02	-2.23011	4.36181e-10	Yes
ENSG00000085063	966	CD59	CD59 molecule (CD59 blood group)	4986.29	1910.45	3448.37	2.61001	7.75618e-06	Yes	6169.06	1669.55	3919.31	3.69505	3.04847e-16	Yes
ENSG00000085117	3732	CD82	CD82 molecule	368.035	194.165	281.1	1.89548	0.0487816	No	428.054	219.273	323.664	1.95215	0.00426632	No
ENSG00000085185	63035	BCORL1	BCL6 corepressor like 1	349.917	1508.11	929.015	-4.30992	2.14327e-05	Yes	321.642	1343.68	832.663	-4.17758	6.94736e-10	Yes
ENSG00000085224	546	ATRX	ATRX chromatin remodeler	2640.72	5725.58	4183.15	-2.16819	0.00454443	Yes	2519.99	5236.15	3878.07	-2.07785	0.000506386	Yes
ENSG00000085231	102157402	AK6	adenylate kinase 6	1462.79	1571.49	1517.14	-1.07431	0.770532	No	2630.49	1796.26	2213.38	1.46442	3.62067e-05	No
ENSG00000085265	2219	FCN1	ficolin 1	2.93547	0.972133	1.9538	3.01962	0.0163796	Yes	6.22077	1.19946	3.71011	5.18632	5.22842e-06	Yes
ENSG00000085274	55892	MYNN	myoneurin	217.114	586.051	401.583	-2.69927	0.000903891	Yes	378.49	745.535	562.012	-1.96976	5.80588e-07	No
ENSG00000085276	2122	MECOM	MDS1 and EVI1 complex locus	107.486	72.1739	89.8299	1.48926	0.184208	No	123.246	149.871	136.558	-1.21603	0.393387	No
ENSG00000085365	9522	SCAMP1	secretory carrier membrane protein 1	3062.14	4481.57	3771.85	-1.46354	0.228207	No	3289.25	3213.71	3251.48	1.02351	0.914276	No
ENSG00000085377	5550	PREP	prolyl endopeptidase	1427.62	1796.8	1612.21	-1.2586	0.15478	No	1683.05	1453.49	1568.27	1.15793	0.180284	No
ENSG00000085382	57531	HACE1	HECT domain and ankyrin repeat containing E3 ubiquitin protein ligase 1	902.859	485.085	693.972	1.86124	0.00228961	No	1165.2	1145.41	1155.31	1.01728	0.914833	No
ENSG00000085415	81929	SEH1L	SEH1 like nucleoporin	1543.46	1504.8	1524.13	1.02569	0.915239	No	1627.31	1378.72	1503.01	1.1803	0.208614	No
ENSG00000085433	22911	WDR47	WD repeat domain 47	5126.61	8674.97	6900.79	-1.69215	0.0409984	No	4373.01	5154.68	4763.84	-1.17875	0.446858	No
ENSG00000085449	57590	WDFY1	WD repeat and FYVE domain containing 1	927.732	974.139	950.936	-1.05002	0.856851	No	1020.76	1379.19	1199.97	-1.35113	0.00847311	No
ENSG00000085465	5016	OVGP1	oviductal glycoprotein 1	81.7427	13.6548	47.6987	5.98636	0.00101282	Yes	361.778	141.941	251.86	2.5488	3.99499e-05	Yes
ENSG00000085491	29957	SLC25A24	solute carrier family 25 member 24	135.702	366.889	251.296	-2.70363	0.00716152	Yes	138.437	664.167	401.302	-4.7976	2.04158e-11	Yes
ENSG00000085511	4216	MAP3K4	mitogen-activated protein kinase kinase kinase 4	779.711	784.207	781.959	-1.00577	0.977606	No	1191.77	1463.27	1327.52	-1.22781	0.00957861	No
ENSG00000085514	29992	PILRA	paired immunoglobin like type 2 receptor alpha	41.7607	9.81929	25.79	4.25292	0.0269221	Yes	140.928	147.674	144.301	-1.04787	0.852636	No
ENSG00000085552	57549	IGSF9	immunoglobulin superfamily member 9	4.18267	1123	563.591	-268.489	3.75036e-11	Yes	7.19839	2712.8	1360	-376.862	7.87117e-14	Yes
ENSG00000085563	5243	ABCB1	ATP binding cassette subfamily B member 1	557.199	91.1652	324.182	6.11197	6.06694e-06	Yes	567.353	125.99	346.672	4.50315	2.96437e-09	Yes
ENSG00000085644	7760	ZNF213	zinc finger protein 213	822.731	878.984	850.858	-1.06837	0.813531	No	570.099	833.444	701.771	-1.46193	0.0133313	No
ENSG00000085662	231	AKR1B1	aldo-keto reductase family 1 member B	2437.47	2691.83	2564.65	-1.10435	0.529967	No	2675.47	2495.3	2585.39	1.0722	0.569658	No
ENSG00000085719	8895	CPNE3	copine 3	569.63	2443.7	1506.67	-4.28999	4.93258e-05	Yes	758.047	2493.79	1625.92	-3.28976	1.4364e-07	Yes
ENSG00000085721	54700	RRN3	RRN3 homolog, RNA polymerase I transcription factor	627.173	2284.38	1455.78	-3.64235	2.29576e-06	Yes	878.78	2136.79	1507.78	-2.43154	3.55004e-10	Yes
ENSG00000085733	2017	CTTN	cortactin	2972.2	2076.94	2524.57	1.43105	0.0267521	No	4365.2	3767.42	4066.31	1.15867	0.0252825	No
ENSG00000085741	7481	WNT11	Wnt family member 11	14.8506	20.1727	17.5117	-1.35838	0.727067	No	12.2736	29.9005	21.087	-2.43616	0.0937843	No
ENSG00000085760	4528	MTIF2	mitochondrial translational initiation factor 2	460.033	277.962	368.998	1.65502	0.0119414	No	787.862	436.034	611.948	1.80688	1.49324e-08	No
ENSG00000085788	23259	DDHD2	DDHD domain containing 2	3841.5	1245.94	2543.72	3.08321	5.03142e-08	Yes	4166.38	1967.43	3066.9	2.11768	4.23663e-07	Yes
ENSG00000085831	22996	TTC39A	tetratricopeptide repeat domain 39A	130.044	7.02336	68.5338	18.516	2.12026e-08	Yes	187.077	9.41623	98.2468	19.8676	7.31425e-08	Yes
ENSG00000085832	2060	EPS15	epidermal growth factor receptor pathway substrate 15	6563.31	2761.38	4662.34	2.37682	0.00043376	Yes	5663.77	2176.2	3919.99	2.6026	3.65463e-08	Yes
ENSG00000085840	4998	ORC1	origin recognition complex subunit 1	8.39471	69.4749	38.9348	-8.27603	0.000785473	Yes	11.5391	277.784	144.661	-24.0733	1.26682e-07	Yes
ENSG00000085871	4258	MGST2	microsomal glutathione S-transferase 2	193.071	50.2035	121.637	3.84577	0.000339646	Yes	294.686	77.4258	186.056	3.80605	5.4417e-08	Yes
ENSG00000085872	10523	CHERP	calcium homeostasis endoplasmic reticulum protein	719.214	1524.78	1122	-2.12007	0.00344807	Yes	1048.34	2123	1585.67	-2.0251	3.46106e-07	Yes
ENSG00000085978	55054	ATG16L1	autophagy related 16 like 1	1214.2	1021.3	1117.75	1.18888	0.278319	No	1577.51	1160.56	1369.04	1.35927	0.00735304	No
ENSG00000085982	55230	USP40	ubiquitin specific peptidase 40	314.247	223.796	269.021	1.40417	0.260041	No	744.651	860.681	802.666	-1.15582	0.304081	No
ENSG00000085998	55624	POMGNT1	protein O-linked mannose N-acetylglucosaminyltransferase 1 (beta 1,2-)	2311.2	1900.96	2106.08	1.2158	0.209371	No	3317.58	2709.95	3013.76	1.22422	0.0146291	No
ENSG00000085999	8438	RAD54L	RAD54 like	59.0151	91.6495	75.3323	-1.55298	0.377024	No	57.2013	362.916	210.058	-6.34453	0.00140865	Yes
ENSG00000086015	23139	MAST2	microtubule associated serine/threonine kinase 2	1738.55	3598.71	2668.63	-2.06995	0.0145614	Yes	1830.89	5309.46	3570.18	-2.89993	7.3128e-10	Yes
ENSG00000086061	3301	DNAJA1	DnaJ heat shock protein family (Hsp40) member A1	6602.49	10124.1	8363.27	-1.53337	0.0526281	No	8597.08	9923.24	9260.16	-1.15426	0.127265	No
ENSG00000086062	2683	B4GALT1	beta-1,4-galactosyltransferase 1	116.442	149.654	133.048	-1.28522	0.308839	No	169.836	265.107	217.472	-1.56096	4.80225e-05	No
ENSG00000086065	51510	CHMP5	charged multivesicular body protein 5	1971.01	2320.08	2145.54	-1.1771	0.597855	No	2831.82	2205.97	2518.9	1.28371	0.0015917	No
ENSG00000086102	4799	NFX1	nuclear transcription factor, X-box binding 1	762.787	1190.91	976.849	-1.56126	0.00737692	No	1167.29	1328.57	1247.93	-1.13816	0.083547	No
ENSG00000086159	363	AQP6	aquaporin 6	24.6901	1.53077	13.1104	16.1292	2.23501e-05	Yes	43.1378	14.4745	28.8061	2.98025	0.00403699	Yes
ENSG00000086189	27292	DIMT1	DIMT1 rRNA methyltransferase and ribosome maturation factor	626.57	1166.69	896.629	-1.86202	0.00932816	No	334.976	361.122	348.049	-1.07805	0.534159	No
ENSG00000086200	51194	IPO11	importin 11	570.468	665.82	618.144	-1.16715	0.52777	No	538.325	624.33	581.327	-1.15976	0.184133	No
ENSG00000086205	2346	FOLH1	folate hydrolase 1	495.39	21.4079	258.399	23.1405	1.15437e-05	Yes	367.558	76.9937	222.276	4.77388	0.000587677	Yes
ENSG00000086232	27102	EIF2AK1	eukaryotic translation initiation factor 2 alpha kinase 1	3109.19	2930.46	3019.83	1.06099	0.665788	No	3969.16	3330.38	3649.77	1.1918	0.00999653	No
ENSG00000086289	54749	EPDR1	ependymin related 1	2083.24	109.9	1096.57	18.9558	1.78341e-09	Yes	2108.33	167.737	1138.03	12.5692	4.87295e-15	Yes
ENSG00000086300	29887	SNX10	sorting nexin 10	2746.96	265.222	1506.09	10.3572	5.20534e-08	Yes	3887.79	424.977	2156.38	9.14823	2.06888e-13	Yes
ENSG00000086475	22929	SEPHS1	selenophosphate synthetase 1	789.276	1589.89	1189.58	-2.01436	0.0103892	Yes	956.509	2474.84	1715.68	-2.58737	6.9709e-07	Yes
ENSG00000086504	10573	MRPL28	mitochondrial ribosomal protein L28	1656.58	1064.85	1360.72	1.5557	0.0279761	No	2279.9	1225.17	1752.53	1.86088	0.0012866	No
ENSG00000086506	3049	HBQ1	hemoglobin subunit theta 1	67.1244	32.4318	49.7781	2.06971	0.0529549	No	32.1821	17.7647	24.9734	1.81157	0.137656	No
ENSG00000086544	80271	ITPKC	inositol-trisphosphate 3-kinase C	234.974	339.49	287.232	-1.4448	0.060162	No	309.782	488.985	399.383	-1.57848	0.000301772	No
ENSG00000086570	2196	FAT2	FAT atypical cadherin 2	28.5154	35.6779	32.0967	-1.25118	0.62167	No	22.1164	26.3229	24.2197	-1.1902	0.777416	No
ENSG00000086589	55696	RBM22	RNA binding motif protein 22	963.644	1888.76	1426.2	-1.96001	3.852e-05	No	1321.5	2239.39	1780.45	-1.69458	2.42574e-09	No
ENSG00000086598	10959	TMED2	transmembrane p24 trafficking protein 2	1942.22	3003.7	2472.96	-1.54653	0.0814314	No	2304.55	2853.52	2579.03	-1.23821	0.00815872	No
ENSG00000086619	56605	ERO1B	endoplasmic reticulum oxidoreductase 1 beta	315.37	233.401	274.386	1.35119	0.257146	No	522.634	392.165	457.399	1.33269	0.102866	No
ENSG00000086666	54469	ZFAND6	zinc finger AN1-type containing 6	597.147	1249.45	923.298	-2.09236	0.0152875	Yes	950.313	1634.51	1292.41	-1.71997	0.000134677	No
ENSG00000086696	3294	HSD17B2	hydroxysteroid 17-beta dehydrogenase 2	0.820255	1.40925	1.11475	-1.71806	0.385887	No	1.02387	6.59406	3.80897	-6.4403	6.11749e-06	Yes
ENSG00000086712	55787	TXLNG	taxilin gamma	342.024	496.137	419.08	-1.45059	0.0335457	No	726.25	795.764	761.007	-1.09572	0.382194	No
ENSG00000086717	5475	PPEF1	protein phosphatase with EF-hand domain 1	398.773	87.9747	243.374	4.53282	0.000292262	Yes	429.903	113.579	271.741	3.78505	0.000783816	Yes
ENSG00000086730	7462	LAT2	linker for activation of T cells family member 2	75.9846	36.5132	56.2489	2.08102	0.0104165	Yes	100.221	40.003	70.1118	2.50533	5.97641e-06	Yes
ENSG00000086758	10075	HUWE1	HECT, UBA and WWE domain containing E3 ubiquitin protein ligase 1	6621.38	8291.62	7456.5	-1.25225	0.450462	No	6152.86	9406.12	7779.49	-1.52874	0.00292479	No
ENSG00000086827	9183	ZW10	zw10 kinetochore protein	278.896	345.436	312.166	-1.23858	0.381008	No	354.336	535.671	445.004	-1.51176	0.00140705	No
ENSG00000086848	79796	ALG9	ALG9 alpha-1,2-mannosyltransferase	228.893	400.182	314.538	-1.74834	0.00124901	No	360.102	762.702	561.402	-2.11802	3.6372e-09	Yes
ENSG00000086967	4606	MYBPC2	myosin binding protein C, fast type	24.3361	1.85634	13.0962	13.1097	0.000195284	Yes	42.609	2.63554	22.6223	16.1671	1.36256e-06	Yes
ENSG00000086991	50507	NOX4	NADPH oxidase 4	7.22946	24.4396	15.8345	-3.38055	0.00897168	Yes	9.576	68.1878	38.8819	-7.1207	2.92928e-05	Yes
ENSG00000087008	8310	ACOX3	acyl-CoA oxidase 3, pristanoyl	358.311	466.668	412.489	-1.30241	0.107015	No	330.69	389.608	360.149	-1.17817	0.0977608	No
ENSG00000087053	8898	MTMR2	myotubularin related protein 2	1316.02	1431.72	1373.87	-1.08792	0.653022	No	1308.66	1188.15	1248.41	1.10143	0.443585	No
ENSG00000087074	23645	PPP1R15A	protein phosphatase 1 regulatory subunit 15A	781.696	1492.54	1137.12	-1.90936	0.00147973	No	1340.19	1881.39	1610.79	-1.40383	0.00187181	No
ENSG00000087076	51171	HSD17B14	hydroxysteroid 17-beta dehydrogenase 14	218.829	26.8031	122.816	8.1643	4.26658e-05	Yes	414.376	39.578	226.977	10.4699	3.6198e-11	Yes
ENSG00000087077	7205	TRIP6	thyroid hormone receptor interactor 6	246.045	167.391	206.718	1.46989	0.377657	No	342.287	452.707	397.497	-1.3226	0.414862	No
ENSG00000087085	43	ACHE	acetylcholinesterase (Cartwright blood group)	781.686	194.469	488.078	4.01959	0.000180115	Yes	806.499	318.219	562.359	2.53441	0.00166764	Yes
ENSG00000087086	2512	FTL	ferritin light chain	17007.7	13575	15291.3	1.25287	0.339953	No	27141.5	10674.3	18907.9	2.54269	5.85101e-09	Yes
ENSG00000087087	51593	SRRT	serrate, RNA effector molecule	1281.61	2577.24	1929.43	-2.01094	7.63953e-05	Yes	2284.18	5012.41	3648.3	-2.1944	3.21127e-07	Yes
ENSG00000087088	581	BAX	BCL2 associated X, apoptosis regulator	231.264	568.378	399.821	-2.45771	8.70516e-05	Yes	455.873	752.347	604.11	-1.65034	0.00247275	No
ENSG00000087095	51701	NLK	nemo like kinase	4560.31	1232.82	2896.56	3.6991	2.14584e-07	Yes	5770.51	1524.8	3647.65	3.78444	5.37337e-13	Yes
ENSG00000087111	94005	PIGS	phosphatidylinositol glycan anchor biosynthesis class S	1147.08	1009.26	1078.17	1.13655	0.426128	No	1211.57	1102.31	1156.94	1.09912	0.200185	No
ENSG00000087116	9509	ADAMTS2	ADAM metallopeptidase with thrombospondin type 1 motif 2	63.7317	51.0145	57.3731	1.24928	0.686114	No	80.7621	152.189	116.475	-1.88441	0.0335599	No
ENSG00000087152	56970	ATXN7L3	ataxin 7 like 3	7227.09	4291.4	5759.24	1.68409	0.00353622	No	6839.43	3818.76	5329.09	1.79101	1.92835e-05	No
ENSG00000087157	9489	PGS1	phosphatidylglycerophosphate synthase 1	726.097	730.259	728.178	-1.00573	0.975166	No	898.476	1060.84	979.659	-1.18071	0.0197915	No
ENSG00000087191	5705	PSMC5	proteasome 26S subunit, ATPase 5	2753.63	2031	2392.31	1.3558	0.0787466	No	4852.43	2896.01	3874.22	1.67556	1.55144e-05	No
ENSG00000087206	51720	UIMC1	ubiquitin interaction motif containing 1	216.424	948.317	582.371	-4.38176	7.64711e-08	Yes	470.817	1237.79	854.302	-2.62902	2.93331e-13	Yes
ENSG00000087237	1071	CETP	cholesteryl ester transfer protein	21.7287	25.4607	23.5947	-1.17176	0.75129	No	11.2706	31.9389	21.6047	-2.83382	0.00551851	Yes
ENSG00000087245	4313	MMP2	matrix metallopeptidase 2	110.228	256.188	183.208	-2.32418	0.0174275	Yes	114.498	416.677	265.588	-3.63915	0.000115337	Yes
ENSG00000087250	4504	MT3	metallothionein 3	8259.53	136.125	4197.83	60.6762	4.67031e-10	Yes	8942.32	127.374	4534.85	70.2052	1.88323e-16	Yes
ENSG00000087253	54947	LPCAT2	lysophosphatidylcholine acyltransferase 2	158.795	41.3478	100.071	3.84046	6.80131e-05	Yes	159.642	72.4136	116.028	2.20458	0.00570858	Yes
ENSG00000087258	2775	GNAO1	G protein subunit alpha o1	12129.9	9626.12	10878	1.2601	0.318787	No	14457.6	10494.6	12476.1	1.37763	0.00802228	No
ENSG00000087263	55239	OGFOD1	2-oxoglutarate and iron dependent oxygenase domain containing 1	528.356	722.879	625.618	-1.36817	0.0470593	No	875.004	935.554	905.279	-1.0692	0.44318	No
ENSG00000087266	6452	SH3BP2	SH3 domain binding protein 2	259.267	1803.97	1031.62	-6.95796	1.73088e-06	Yes	485.85	4181.7	2333.77	-8.60697	2.12117e-16	Yes
ENSG00000087269	8602	NOP14	NOP14 nucleolar protein	269.831	405.705	337.768	-1.50355	0.0185055	No	436.999	638.242	537.621	-1.46051	7.46122e-05	No
ENSG00000087274	118	ADD1	adducin 1	10406.7	10146.4	10276.5	1.02565	0.868493	No	11492.5	10421.2	10956.9	1.10281	0.206426	No
ENSG00000087299	79944	L2HGDH	L-2-hydroxyglutarate dehydrogenase	117.623	141.048	129.335	-1.19915	0.401299	No	141.452	173.692	157.572	-1.22792	0.293774	No
ENSG00000087301	57544	TXNDC16	thioredoxin domain containing 16	487.78	877.82	682.8	-1.79962	0.00805072	No	613.897	937.277	775.587	-1.52677	0.00419637	No
ENSG00000087302	51637	RTRAF	RNA transcription, translation and transport factor	965.415	2009.05	1487.23	-2.08103	0.00144383	Yes	1580.1	2138.48	1859.29	-1.35338	0.0019061	No
ENSG00000087303	22795	NID2	nidogen 2	129.582	286.022	207.802	-2.20726	0.0237965	Yes	66.066	389.897	227.982	-5.90163	1.58369e-05	Yes
ENSG00000087338	64395	GMCL1	germ cell-less 1, spermatogenesis associated	286.744	336.023	311.384	-1.17186	0.465536	No	436.681	617.676	527.178	-1.41448	0.0118464	No
ENSG00000087365	10992	SF3B2	splicing factor 3b subunit 2	3697.81	6711.67	5204.74	-1.81504	0.000110821	No	6131.33	7904.52	7017.92	-1.2892	0.00162114	No
ENSG00000087448	57542	KLHL42	kelch like family member 42	1621.09	1055.97	1338.53	1.53517	0.024971	No	2391.37	1955.72	2173.55	1.22276	0.0905402	No
ENSG00000087460	2778	GNAS	GNAS complex locus	51337.5	38042.4	44690	1.34948	0.0716126	No	69870.4	39272.6	54571.5	1.77911	3.65463e-08	No
ENSG00000087470	10059	DNM1L	dynamin 1 like	4023.06	3615.01	3819.04	1.11288	0.54881	No	5904.07	4157.67	5030.87	1.42004	0.00143601	No
ENSG00000087494	5744	PTHLH	parathyroid hormone like hormone	109.201	2.2476	55.7243	48.5855	1.04908e-09	Yes	193.082	4.5754	98.8286	42.2	3.98129e-15	Yes
ENSG00000087495	116154	PHACTR3	phosphatase and actin regulator 3	2054.17	3094.75	2574.46	-1.50657	0.0454591	No	2759.43	2274.06	2516.74	1.21344	0.190085	No
ENSG00000087502	51290	ERGIC2	ERGIC and golgi 2	632.617	594.749	613.683	1.06367	0.813424	No	1212.06	907.711	1059.89	1.3353	0.00106538	No
ENSG00000087510	7022	TFAP2C	transcription factor AP-2 gamma	8.34339	94.1269	51.2352	-11.2816	0.00656011	Yes	19.7684	351.361	185.565	-17.7738	0.00439397	Yes
ENSG00000087586	6790	AURKA	aurora kinase A	36.3667	89.3876	62.8771	-2.45795	0.135553	No	54.5904	399.577	227.084	-7.31953	0.000145772	Yes
ENSG00000087589	57091	CASS4	Cas scaffold protein family member 4	15.4017	4.54546	9.97358	3.38837	0.0160933	Yes	20.1793	6.84567	13.5125	2.94775	0.000385514	Yes
ENSG00000087842	8544	PIR	pirin	185.238	40.1802	112.709	4.61017	2.75059e-05	Yes	316.07	54.4223	185.246	5.80774	7.13013e-11	Yes
ENSG00000087884	28971	AAMDC	adipogenesis associated Mth938 domain containing	38.979	26.3734	32.6762	1.47797	0.240774	No	142.377	125.065	133.721	1.13843	0.656849	No
ENSG00000087903	5990	RFX2	regulatory factor X2	103.392	148.186	125.789	-1.43325	0.350022	No	184.064	358.038	271.051	-1.94518	0.0151441	No
ENSG00000087995	339175	METTL2A	methyltransferase like 2A	219.614	365.795	292.705	-1.66563	0.00133614	No	202.892	334.433	268.662	-1.64834	3.86245e-05	No
ENSG00000088002	6820	SULT2B1	sulfotransferase family 2B member 1	19.1935	2.01047	10.602	9.54675	0.000364413	Yes	19.4738	2.67986	11.0768	7.26672	2.97878e-06	Yes
ENSG00000088035	29929	ALG6	ALG6 alpha-1,3-glucosyltransferase	90.3083	196.462	143.385	-2.17546	0.000897002	Yes	211.412	432.098	321.755	-2.04386	8.13077e-05	Yes
ENSG00000088038	4849	CNOT3	CCR4-NOT transcription complex subunit 3	677.993	1063.04	870.517	-1.56792	0.0373369	No	1076.98	1747.11	1412.05	-1.62222	1.9358e-05	No
ENSG00000088053	51206	GP6	glycoprotein VI platelet	10.0799	4.54051	7.31022	2.22	0.0352939	Yes	35.6361	11.3734	23.5048	3.13328	1.95209e-06	Yes
ENSG00000088179	5775	PTPN4	protein tyrosine phosphatase non-receptor type 4	1704.61	1469.5	1587.06	1.15999	0.577953	No	1850.92	1381.35	1616.14	1.33994	0.100644	No
ENSG00000088205	8886	DDX18	DEAD-box helicase 18	888.994	1541.92	1215.46	-1.73446	0.00250678	No	1078.83	1782.35	1430.59	-1.65212	4.70257e-07	No
ENSG00000088247	8570	KHSRP	KH-type splicing regulatory protein	2057.32	4732.92	3395.12	-2.30053	3.81662e-05	Yes	2244.25	5144.6	3694.43	-2.29235	1.89865e-09	Yes
ENSG00000088256	2767	GNA11	G protein subunit alpha 11	1632.33	2025.43	1828.88	-1.24082	0.21682	No	2291.74	2513.99	2402.86	-1.09698	0.553159	No
ENSG00000088280	55616	ASAP3	ArfGAP with SH3 domain, ankyrin repeat and PH domain 3	320.114	304.552	312.333	1.0511	0.908354	No	456.811	818.57	637.691	-1.79192	0.022347	No
ENSG00000088298	55741	EDEM2	ER degradation enhancing alpha-mannosidase like protein 2	219.619	270.2	244.909	-1.23031	0.179379	No	271.594	311.807	291.701	-1.14806	0.169456	No
ENSG00000088305	1789	DNMT3B	DNA methyltransferase 3 beta	16.9515	263.915	140.433	-15.5688	6.25978e-07	Yes	54.7872	812.297	433.542	-14.8264	1.20291e-10	Yes
ENSG00000088320	28954	REM1	RRAD and GEM like GTPase 1	17.5186	0.679775	9.09921	25.7713	1.49225e-07	Yes	19.8711	1.60102	10.7361	12.4115	5.47074e-08	Yes
ENSG00000088325	22974	TPX2	TPX2 microtubule nucleation factor	110.111	597.018	353.565	-5.42196	0.00436868	Yes	138.685	2047.51	1093.1	-14.7638	2.77593e-05	Yes
ENSG00000088340	80307	FER1L4	fer-1 like family member 4 (pseudogene)	15.879	4.89722	10.3881	3.24244	0.166801	No	121.339	50.0489	85.6939	2.4244	0.00093086	Yes
ENSG00000088356	81572	PDRG1	p53 and DNA damage regulated 1	428.53	838.577	633.554	-1.95687	0.00141729	No	632.919	707.408	670.164	-1.11769	0.38953	No
ENSG00000088367	2036	EPB41L1	erythrocyte membrane protein band 4.1 like 1	10759.7	3696.94	7228.3	2.91043	0.000966972	Yes	10644.3	3696.44	7170.37	2.87961	2.5576e-06	Yes
ENSG00000088386	6564	SLC15A1	solute carrier family 15 member 1	0.683929	0.778909	0.731419	-1.13887	0.772729	No	0.719518	1.14818	0.93385	-1.59577	0.137297	No
ENSG00000088387	23348	DOCK9	dedicator of cytokinesis 9	3393.06	2352.42	2872.74	1.44237	0.333687	No	3543.59	2265.09	2904.34	1.56443	0.159407	No
ENSG00000088448	55608	ANKRD10	ankyrin repeat domain 10	805.275	1243.4	1024.34	-1.54406	0.0386929	No	1982.81	4434.25	3208.53	-2.23635	2.28746e-07	Yes
ENSG00000088451	23483	TGDS	TDP-glucose 4,6-dehydratase	72.0887	55.465	63.7769	1.29971	0.517343	No	122.541	150.117	136.329	-1.22504	0.256909	No
ENSG00000088538	1795	DOCK3	dedicator of cytokinesis 3	7182.13	2539.48	4860.8	2.82819	0.00307766	Yes	5596.34	2414.65	4005.5	2.31766	1.09189e-05	Yes
ENSG00000088543	51161	C3orf18	chromosome 3 open reading frame 18	988.652	481.115	734.883	2.05492	8.78005e-05	Yes	1174.17	604.186	889.176	1.94339	6.3673e-08	No
ENSG00000088682	57017	COQ9	coenzyme Q9	793.438	483.751	638.594	1.64018	0.0125256	No	1203.85	819.247	1011.55	1.46946	3.05429e-05	No
ENSG00000088726	55287	TMEM40	transmembrane protein 40	1.92561	1.65655	1.79108	1.16242	0.791944	No	2.67233	1.85749	2.26491	1.43868	0.398958	No
ENSG00000088727	64147	KIF9	kinesin family member 9	160.757	62.8524	111.805	2.55769	0.000179294	Yes	283.08	83.2171	183.149	3.40171	7.98344e-08	Yes
ENSG00000088756	79822	ARHGAP28	Rho GTPase activating protein 28	47.1827	155.795	101.489	-3.30195	0.00162392	Yes	80.657	264.564	172.611	-3.28012	1.05457e-06	Yes
ENSG00000088766	54675	CRLS1	cardiolipin synthase 1	556.257	874.113	715.185	-1.57142	0.0228153	No	703.877	875.992	789.934	-1.24453	0.0203487	No
ENSG00000088808	23368	PPP1R13B	protein phosphatase 1 regulatory subunit 13B	1397.31	655.979	1026.65	2.13012	0.0141059	Yes	1811.77	863.558	1337.66	2.09803	5.28186e-06	Yes
ENSG00000088812	8455	ATRN	attractin	4002.67	3013.58	3508.12	1.32821	0.259382	No	3933.4	2779.94	3356.67	1.41492	0.0202687	No
ENSG00000088826	54498	SMOX	spermine oxidase	728.618	439.368	583.993	1.65833	0.00364105	No	926.077	574.044	750.061	1.61325	0.00134913	No
ENSG00000088827	6614	SIGLEC1	sialic acid binding Ig like lectin 1	39.7815	5.7033	22.7424	6.97516	0.00826677	Yes	44.5008	27.3652	35.933	1.62618	0.147892	No
ENSG00000088832	2280	FKBP1A	FKBP prolyl isomerase 1A	4938.24	3291.78	4115.01	1.50017	0.0134182	No	6051.41	3234.09	4642.75	1.87113	1.9085e-08	No
ENSG00000088833	55968	NSFL1C	NSFL1 cofactor	2353.2	2576.25	2464.72	-1.09479	0.530755	No	3493.38	2631.94	3062.66	1.3273	0.000189832	No
ENSG00000088836	83959	SLC4A11	solute carrier family 4 member 11	43.6955	3.70315	23.6993	11.7996	2.70813e-07	Yes	82.2471	10.5377	46.3924	7.80506	2.36905e-08	Yes
ENSG00000088854	25943	C20orf194	chromosome 20 open reading frame 194	2424.11	2444.49	2434.3	-1.00841	0.973542	No	2529.97	2856.1	2693.04	-1.12891	0.300818	No
ENSG00000088876	79175	ZNF343	zinc finger protein 343	126.326	174.828	150.577	-1.38395	0.181814	No	224.114	383.785	303.95	-1.71245	9.77692e-07	No
ENSG00000088881	57593	EBF4	EBF family member 4	346.494	884.55	615.522	-2.55286	0.00168129	Yes	393.514	1236.06	814.788	-3.14109	1.16659e-06	Yes
ENSG00000088882	56265	CPXM1	carboxypeptidase X, M14 family member 1	25.0774	303.215	164.146	-12.0912	1.60737e-05	Yes	33.587	1345.32	689.452	-40.0546	1.53581e-07	Yes
ENSG00000088888	57506	MAVS	mitochondrial antiviral signaling protein	241.428	235.666	238.547	1.02445	0.956193	No	197.175	280.49	238.833	-1.42254	0.119478	No
ENSG00000088899	9762	LZTS3	leucine zipper tumor suppressor family member 3	7331.33	992.22	4161.78	7.38882	6.36707e-09	Yes	9121.98	1689.92	5405.95	5.39787	1.13792e-14	Yes
ENSG00000088926	2160	F11	coagulation factor XI	1.43734	0.608943	1.02314	2.36039	0.0622215	No	3.59014	1.93268	2.76141	1.8576	0.0917957	No
ENSG00000088930	22803	XRN2	5'-3' exoribonuclease 2	622.836	3676.41	2149.62	-5.90269	1.05333e-09	Yes	899.233	3615.13	2257.18	-4.02023	9.99273e-17	Yes
ENSG00000088970	55857	KIZ	kizuna centrosomal protein	403.165	253.398	328.282	1.59103	0.0751065	No	777.495	504.207	640.851	1.54201	0.0021912	No
ENSG00000088986	8655	DYNLL1	dynein light chain LC8-type 1	7747.9	7232.68	7490.29	1.07123	0.753372	No	15460.6	6968.32	11214.5	2.21871	1.00563e-08	Yes
ENSG00000088992	54997	TESC	tescalcin	630.14	37.012	333.576	17.0253	1.44038e-10	Yes	815.616	42.5866	429.101	19.152	2.84359e-14	Yes
ENSG00000089006	27131	SNX5	sorting nexin 5	1020.01	585.467	802.737	1.74221	0.0459693	No	1683.84	1755.18	1719.51	-1.04237	0.761201	No
ENSG00000089009	6128	RPL6	ribosomal protein L6	3231.09	15321.1	9276.1	-4.74177	1.65411e-06	Yes	7121.16	20985.8	14053.5	-2.94696	2.46344e-12	Yes
ENSG00000089012	55423	SIRPG	signal regulatory protein gamma	2.33978	0.527904	1.43384	4.43221	0.00126275	Yes	3.47447	0.672803	2.07364	5.16417	7.2003e-07	Yes
ENSG00000089022	8550	MAPKAPK5	MAPK activated protein kinase 5	587.053	685.959	636.506	-1.16848	0.245926	No	667.689	1000.16	833.923	-1.49794	9.72867e-07	No
ENSG00000089041	5027	P2RX7	purinergic receptor P2X 7	261.877	9.39542	135.636	27.8728	5.26357e-08	Yes	250.373	8.73761	129.555	28.6546	3.92365e-09	Yes
ENSG00000089048	51575	ESF1	ESF1 nucleolar pre-rRNA processing protein homolog	277.938	388.652	333.295	-1.39834	0.110039	No	529.505	648.213	588.859	-1.22419	0.0640458	No
ENSG00000089050	10741	RBBP9	RB binding protein 9, serine hydrolase	214.169	466.905	340.537	-2.18008	0.000105952	Yes	352.996	733.317	543.156	-2.07741	5.65384e-08	Yes
ENSG00000089053	51433	ANAPC5	anaphase promoting complex subunit 5	3268.25	3730.23	3499.24	-1.14135	0.357562	No	4324.42	3728.97	4026.69	1.15968	0.0262151	No
ENSG00000089057	9962	SLC23A2	solute carrier family 23 member 2	4356.32	2792.1	3574.21	1.56023	0.117686	No	4006.89	2792.84	3399.86	1.4347	0.0574265	No
ENSG00000089060	80024	SLC8B1	solute carrier family 8 member B1	184.824	86.5751	135.7	2.13484	0.00484245	Yes	388.343	272.238	330.291	1.42648	0.0304734	No
ENSG00000089063	29058	TMEM230	transmembrane protein 230	1776.57	902.994	1339.78	1.96742	0.00164686	No	2419.54	1260.98	1840.26	1.91877	1.69135e-08	No
ENSG00000089091	55184	DZANK1	double zinc ribbon and ankyrin repeat domains 1	149.013	172.722	160.867	-1.15911	0.40106	No	317.03	375.716	346.373	-1.18511	0.173033	No
ENSG00000089094	84678	KDM2B	lysine demethylase 2B	803.083	2863.21	1833.15	-3.56527	3.88115e-08	Yes	926.222	3241.09	2083.65	-3.49925	7.76003e-15	Yes
ENSG00000089101	26074	CFAP61	cilia and flagella associated protein 61	43.7619	9.33659	26.5492	4.68714	0.000361086	Yes	58.463	34.1902	46.3266	1.70993	0.0741455	No
ENSG00000089116	64211	LHX5	LIM homeobox 5	0.568654	22.3834	11.476	-39.362	4.18523e-08	Yes	0.697526	103.807	52.2522	-148.821	2.50564e-05	Yes
ENSG00000089123	55617	TASP1	taspase 1	293.064	135.567	214.316	2.16177	5.34228e-05	Yes	416.062	283.258	349.66	1.46885	0.000473813	No
ENSG00000089127	4938	OAS1	2'-5'-oligoadenylate synthetase 1	77.2766	8.4059	42.8412	9.19314	0.000163817	Yes	142.992	11.9352	77.4635	11.9806	4.78086e-10	Yes
ENSG00000089154	10985	GCN1	GCN1 activator of EIF2AK4	1312.4	2626.93	1969.67	-2.00163	0.0019267	Yes	1505.53	3598.58	2552.06	-2.39024	7.36104e-13	Yes
ENSG00000089157	6175	RPLP0	ribosomal protein lateral stalk subunit P0	4310.76	36956	20633.4	-8.57297	4.25467e-08	Yes	4605.72	26497.3	15551.5	-5.75312	7.5672e-15	Yes
ENSG00000089159	5829	PXN	paxillin	230.552	434.351	332.451	-1.88396	0.00956974	No	640.38	1097.77	869.073	-1.71424	0.000418887	No
ENSG00000089163	23409	SIRT4	sirtuin 4	45.3142	97.1408	71.2275	-2.14372	0.00500194	Yes	69.7661	102.284	86.0252	-1.4661	0.0120372	No
ENSG00000089169	22895	RPH3A	rabphilin 3A	14012.5	67.78	7040.14	206.735	5.96435e-08	Yes	13609.8	89.609	6849.72	151.88	1.41008e-12	Yes
ENSG00000089177	55614	KIF16B	kinesin family member 16B	318.446	193.96	256.203	1.64181	0.0158278	No	317.08	279.326	298.203	1.13516	0.480107	No
ENSG00000089195	51605	TRMT6	tRNA methyltransferase 6	324.048	351.236	337.642	-1.0839	0.70391	No	522.284	448.33	485.307	1.16495	0.034101	No
ENSG00000089199	1114	CHGB	chromogranin B	5455.68	1797.24	3626.46	3.03559	7.7618e-05	Yes	10146.2	2352.46	6249.31	4.31301	7.97512e-12	Yes
ENSG00000089220	5037	PEBP1	phosphatidylethanolamine binding protein 1	22545.6	10211.5	16378.5	2.20786	3.11994e-05	Yes	32619.7	9441.17	21030.5	3.45505	4.39558e-15	Yes
ENSG00000089225	6910	TBX5	T-box 5	2.48185	0.578773	1.53031	4.28812	0.000960252	Yes	2.04523	1.81003	1.92763	1.12994	0.803324	No
ENSG00000089234	8315	BRAP	BRCA1 associated protein	568.555	923.339	745.947	-1.62401	0.00203129	No	751.804	951.98	851.892	-1.26626	0.00243243	No
ENSG00000089248	10961	ERP29	endoplasmic reticulum protein 29	1323.86	2251.37	1787.62	-1.70061	0.00642045	No	2415.95	2340.56	2378.25	1.03221	0.749141	No
ENSG00000089250	4842	NOS1	nitric oxide synthase 1	371.547	41.5243	206.536	8.94769	0.00458899	Yes	296.324	24.3719	160.348	12.1584	0.000250242	Yes
ENSG00000089280	2521	FUS	FUS RNA binding protein	3862.1	10558.7	7210.4	-2.73392	5.38387e-06	Yes	7836.66	14954.1	11395.4	-1.90822	2.31258e-07	No
ENSG00000089289	3476	IGBP1	immunoglobulin binding protein 1	951.879	2407.69	1679.78	-2.52941	0.000190897	Yes	1563.72	2354.9	1959.31	-1.50596	7.37555e-05	No
ENSG00000089327	53827	FXYD5	FXYD domain containing ion transport regulator 5	122.549	37.6252	80.0871	3.2571	0.000302837	Yes	166.634	49.6047	108.119	3.35923	1.12552e-05	Yes
ENSG00000089335	55900	ZNF302	zinc finger protein 302	714.267	1318.84	1016.55	-1.84643	0.00477774	No	1533.4	2226.72	1880.06	-1.45215	0.00172663	No
ENSG00000089351	57655	GRAMD1A	GRAM domain containing 1A	1031.01	3766.73	2398.87	-3.65344	5.82118e-07	Yes	958.973	3026.85	1992.91	-3.15634	3.76165e-10	Yes
ENSG00000089356	5349	FXYD3	FXYD domain containing ion transport regulator 3	17.1691	0.801834	8.98547	21.4123	5.80992e-08	Yes	20.2143	1.55616	10.8853	12.9899	7.92098e-09	Yes
ENSG00000089472	9843	HEPH	hephaestin	370.402	75.3689	222.885	4.91451	0.0012974	Yes	612.629	275.989	444.309	2.21976	0.03202	Yes
ENSG00000089486	29965	CDIP1	cell death inducing p53 target 1	6101.97	1569.66	3835.82	3.88745	1.81591e-08	Yes	6575.16	1575.41	4075.28	4.17363	5.52908e-14	Yes
ENSG00000089505	113540	CMTM1	CKLF like MARVEL transmembrane domain containing 1	15.941	81.5684	48.7547	-5.11688	1.49647e-06	Yes	14.6293	43.1431	28.8862	-2.94909	0.000812837	Yes
ENSG00000089558	23415	KCNH4	potassium voltage-gated channel subfamily H member 4	143.137	5.02714	74.0819	28.4728	3.81053e-06	Yes	181.774	23.5986	102.686	7.70277	0.000109966	Yes
ENSG00000089597	23193	GANAB	glucosidase II alpha subunit	4178.58	4656.84	4417.71	-1.11446	0.524655	No	4406.54	5812.45	5109.49	-1.31905	0.000163391	No
ENSG00000089639	51291	GMIP	GEM interacting protein	159.15	1123.14	641.143	-7.05711	9.5283e-10	Yes	177.507	1473.13	825.317	-8.29899	4.73809e-14	Yes
ENSG00000089682	55285	RBM41	RNA binding motif protein 41	60.8941	93.0175	76.9558	-1.52753	0.0993366	No	69.5331	187.445	128.489	-2.69577	4.67472e-05	Yes
ENSG00000089685	332	BIRC5	baculoviral IAP repeat containing 5	1.80208	69.3363	35.5692	-38.4758	5.4926e-05	Yes	7.94949	815.893	411.921	-102.635	9.57965e-07	Yes
ENSG00000089692	3902	LAG3	lymphocyte activating 3	6.57431	4.74114	5.65773	1.38665	0.649659	No	12.4436	63.594	38.0188	-5.11059	9.97316e-05	Yes
ENSG00000089693	8079	MLF2	myeloid leukemia factor 2	8150.74	4482.63	6316.68	1.8183	0.000132965	No	10553.2	4623.62	7588.41	2.28246	1.04462e-09	Yes
ENSG00000089723	78990	OTUB2	OTU deubiquitinase, ubiquitin aldehyde binding 2	153.331	193.936	173.633	-1.26482	0.275729	No	146.766	234.676	190.721	-1.59898	0.00215089	No
ENSG00000089737	57062	DDX24	DEAD-box helicase 24	8544.59	4846.25	6695.42	1.76313	0.000795457	No	11539.5	5006.45	8272.96	2.30492	4.50303e-14	Yes
ENSG00000089775	7597	ZBTB25	zinc finger and BTB domain containing 25	214.632	370.998	292.815	-1.72853	0.00683377	No	467.838	793.734	630.786	-1.6966	0.000163083	No
ENSG00000089818	25977	NECAP1	NECAP endocytosis associated 1	4796.51	3875.93	4336.22	1.23751	0.364233	No	5385.08	3042.95	4214.01	1.76969	8.42344e-05	No
ENSG00000089820	393	ARHGAP4	Rho GTPase activating protein 4	151.132	117.655	134.394	1.28454	0.336071	No	191.364	266.41	228.887	-1.39216	0.0472118	No
ENSG00000089847	170961	ANKRD24	ankyrin repeat domain 24	1566.71	208.041	887.377	7.53079	0.000537239	Yes	2449.05	295.974	1372.51	8.27453	7.72653e-09	Yes
ENSG00000089876	55760	DHX32	DEAH-box helicase 32 (putative)	296.294	255.496	275.895	1.15968	0.670804	No	507.655	465.402	486.529	1.09079	0.590727	No
ENSG00000089902	23186	RCOR1	REST corepressor 1	323.611	973.558	648.584	-3.00842	6.53077e-06	Yes	456.096	1540.19	998.142	-3.3769	3.13734e-11	Yes
ENSG00000089916	55668	GPATCH2L	G-patch domain containing 2 like	664.785	1842.15	1253.47	-2.77105	8.36709e-05	Yes	1032.64	2263.02	1647.83	-2.19149	1.27747e-05	Yes
ENSG00000090006	8425	LTBP4	latent transforming growth factor beta binding protein 4	867.135	689.063	778.099	1.25843	0.537809	No	829.57	2618.08	1723.83	-3.15595	0.000335082	Yes
ENSG00000090013	645	BLVRB	biliverdin reductase B	419.196	259.202	339.199	1.61725	0.0442601	No	654.812	186.084	420.448	3.51891	6.54369e-07	Yes
ENSG00000090020	6548	SLC9A1	solute carrier family 9 member A1	1270.91	293.75	782.328	4.32649	9.48373e-06	Yes	1465.59	458.87	962.231	3.19392	1.00689e-12	Yes
ENSG00000090054	10558	SPTLC1	serine palmitoyltransferase long chain base subunit 1	972.956	673.958	823.457	1.44364	0.0636262	No	941.608	780.157	860.882	1.20695	0.162498	No
ENSG00000090060	10914	PAPOLA	poly(A) polymerase alpha	1962.19	4219.22	3090.7	-2.15027	0.000464543	Yes	3188.52	5905.24	4546.88	-1.85203	1.58137e-07	No
ENSG00000090061	8812	CCNK	cyclin K	446.443	861.758	654.1	-1.93027	0.000454595	No	666.752	1321.46	994.108	-1.98194	8.38643e-09	No
ENSG00000090097	57060	PCBP4	poly(rC) binding protein 4	1299.33	1967.26	1633.3	-1.51405	0.0291151	No	2425.65	4429.97	3427.81	-1.8263	0.000835076	No
ENSG00000090104	5996	RGS1	regulator of G protein signaling 1	21.6367	10.3228	15.9797	2.09601	0.372617	No	64.9226	52.7518	58.8372	1.23072	0.711757	No
ENSG00000090238	83719	YPEL3	yippee like 3	3903.12	1583.97	2743.55	2.46413	0.000910579	Yes	4914.72	1507.68	3211.2	3.25979	3.0208e-08	Yes
ENSG00000090263	51650	MRPS33	mitochondrial ribosomal protein S33	538.223	413.107	475.665	1.30287	0.306062	No	940.554	424.201	682.378	2.21724	3.86624e-08	Yes
ENSG00000090266	4708	NDUFB2	NADH:ubiquinone oxidoreductase subunit B2	1714.09	860.424	1287.26	1.99214	0.00619274	No	2625	1161.03	1893.01	2.26093	1.00131e-05	Yes
ENSG00000090273	10726	NUDC	nuclear distribution C, dynein complex regulator	2877.15	2692.08	2784.62	1.06874	0.745004	No	4906.45	2582.59	3744.52	1.89982	3.17923e-06	No
ENSG00000090316	10296	MAEA	macrophage erythroblast attacher	1621.19	1453.25	1537.22	1.11556	0.478645	No	1836.48	1664.39	1750.44	1.1034	0.395439	No
ENSG00000090339	3383	ICAM1	intercellular adhesion molecule 1	49.2068	18.0097	33.6083	2.73224	0.00624246	Yes	84.8872	31.0202	57.9537	2.73651	0.000194605	Yes
ENSG00000090372	29888	STRN4	striatin 4	2654.92	4578.15	3616.53	-1.7244	0.00200626	No	2712.51	5084.46	3898.48	-1.87445	7.87377e-06	No
ENSG00000090376	11213	IRAK3	interleukin 1 receptor associated kinase 3	27.3194	21.9852	24.6523	1.24262	0.582374	No	84.7368	62.8047	73.7707	1.34921	0.306965	No
ENSG00000090382	4069	LYZ	lysozyme	14.2668	3.16696	8.71689	4.50489	0.0276401	Yes	26.6057	8.9048	17.7553	2.98779	1.53209e-05	Yes
ENSG00000090432	79594	MUL1	mitochondrial E3 ubiquitin protein ligase 1	711.005	753.486	732.246	-1.05975	0.725614	No	764.14	624.214	694.177	1.22416	0.0897152	No
ENSG00000090447	7023	TFAP4	transcription factor AP-4	102.516	374.375	238.445	-3.65187	3.59208e-06	Yes	171.383	551.517	361.45	-3.21804	1.78556e-08	Yes
ENSG00000090470	10081	PDCD7	programmed cell death 7	627.406	549.678	588.542	1.14141	0.331424	No	671.556	653.225	662.391	1.02806	0.773498	No
ENSG00000090487	51324	SPG21	SPG21 abhydrolase domain containing, maspardin	992.338	1766.69	1379.52	-1.78034	0.00439662	No	1118.29	1680.27	1399.28	-1.50254	1.02565e-06	No
ENSG00000090512	26998	FETUB	fetuin B	4.45295	0.833332	2.64314	5.34355	0.000947169	Yes	8.27646	1.3684	4.82243	6.04829	5.90293e-06	Yes
ENSG00000090520	51726	DNAJB11	DnaJ heat shock protein family (Hsp40) member B11	682.085	1020.1	851.094	-1.49557	0.0450448	No	1213.34	1278.15	1245.75	-1.05341	0.522542	No
ENSG00000090530	55214	P3H2	prolyl 3-hydroxylase 2	62.221	40.0392	51.1301	1.554	0.263468	No	106.789	89.349	98.0689	1.19519	0.43258	No
ENSG00000090534	7066	THPO	thrombopoietin	70.4719	2.06942	36.2707	34.0539	3.88217e-08	Yes	180.119	17.2875	98.7033	10.419	2.28196e-10	Yes
ENSG00000090539	8646	CHRD	chordin	1094.34	43.6664	569.002	25.0613	1.65423e-08	Yes	1890.95	324.691	1107.82	5.82386	4.58993e-09	Yes
ENSG00000090565	9727	RAB11FIP3	RAB11 family interacting protein 3	3416.98	2026.24	2721.61	1.68636	0.0196139	No	3450.93	3061.51	3256.22	1.1272	0.277613	No
ENSG00000090581	84572	GNPTG	N-acetylglucosamine-1-phosphate transferase subunit gamma	1561.37	481.148	1021.26	3.24509	2.24366e-07	Yes	2665.85	913.906	1789.88	2.91699	8.26357e-10	Yes
ENSG00000090612	10795	ZNF268	zinc finger protein 268	175.088	681.28	428.184	-3.89107	5.63486e-07	Yes	239.601	728.487	484.044	-3.04042	6.71926e-11	Yes
ENSG00000090615	2802	GOLGA3	golgin A3	2029.73	1514.07	1771.9	1.34057	0.400654	No	2328.89	2515.03	2421.96	-1.07993	0.368613	No
ENSG00000090621	8761	PABPC4	poly(A) binding protein cytoplasmic 4	1052.83	2398.99	1725.91	-2.27861	6.05184e-07	Yes	1479.65	3257.22	2368.44	-2.20134	3.56978e-13	Yes
ENSG00000090659	30835	CD209	CD209 molecule	12.7364	2.71208	7.72423	4.69617	0.0388421	Yes	6.92451	3.01824	4.97138	2.29422	0.0701583	No
ENSG00000090661	79603	CERS4	ceramide synthase 4	1096.33	1009.47	1052.9	1.08604	0.58218	No	1186.74	1141.84	1164.29	1.03932	0.745913	No
ENSG00000090674	57192	MCOLN1	mucolipin 1	799.061	745.117	772.089	1.0724	0.757972	No	723.173	594.804	658.988	1.21582	0.126428	No
ENSG00000090686	84196	USP48	ubiquitin specific peptidase 48	1309.53	1571.72	1440.62	-1.20021	0.182281	No	2052.16	2456.22	2254.19	-1.1969	0.0213168	No
ENSG00000090776	1947	EFNB1	ephrin B1	181.9	2509	1345.45	-13.7933	2.41895e-07	Yes	215.851	2958.56	1587.21	-13.7065	9.18902e-09	Yes
ENSG00000090857	55066	PDPR	pyruvate dehydrogenase phosphatase regulatory subunit	368.257	427.076	397.667	-1.15972	0.683846	No	626.811	1207.15	916.979	-1.92585	0.0146917	No
ENSG00000090861	16	AARS	alanyl-tRNA synthetase	9101.97	3401.04	6251.5	2.67623	3.06839e-07	Yes	10669.7	3360.7	7015.22	3.17486	1.89005e-16	Yes
ENSG00000090863	2734	GLG1	golgi glycoprotein 1	3467.63	3289.81	3378.72	1.05405	0.845662	No	3111.97	3329.65	3220.81	-1.06995	0.54677	No
ENSG00000090889	24137	KIF4A	kinesin family member 4A	14.0625	173.456	93.7595	-12.3346	0.000244523	Yes	25.2868	748.084	386.685	-29.584	7.40697e-06	Yes
ENSG00000090905	27327	TNRC6A	trinucleotide repeat containing adaptor 6A	1177.21	1586.34	1381.77	-1.34755	0.260615	No	2485.8	3745.86	3115.83	-1.5069	0.000374391	No
ENSG00000090920	---	---	---	47.9236	99.6687	73.7961	-2.07974	0.101318	No	90.6135	171.948	131.281	-1.8976	0.0500634	No
ENSG00000090924	64857	PLEKHG2	pleckstrin homology and RhoGEF domain containing G2	87.5297	1198.02	642.776	-13.687	8.20553e-08	Yes	124.075	2534.29	1329.18	-20.4254	3.22698e-17	Yes
ENSG00000090932	10683	DLL3	delta like canonical Notch ligand 3	201.598	1245.15	723.375	-6.1764	3.4347e-08	Yes	158.316	902.498	530.407	-5.7006	1.71721e-07	Yes
ENSG00000090971	57106	NAT14	N-acetyltransferase 14 (putative)	1042.69	990.591	1016.64	1.0526	0.803744	No	1282.43	1081.32	1181.88	1.18598	0.315373	No
ENSG00000090975	57605	PITPNM2	phosphatidylinositol transfer protein membrane associated 2	2531.95	458.704	1495.33	5.51979	8.58499e-05	Yes	2146.41	827.406	1486.91	2.59415	2.32359e-05	Yes
ENSG00000090989	55763	EXOC1	exocyst complex component 1	1165.87	1477.85	1321.86	-1.2676	0.182994	No	1832.88	1916.32	1874.6	-1.04553	0.640231	No
ENSG00000091009	54439	RBM27	RNA binding motif protein 27	596.078	1388.87	992.474	-2.33001	0.000683453	Yes	559.774	1324.18	941.979	-2.36557	1.19981e-08	Yes
ENSG00000091039	114882	OSBPL8	oxysterol binding protein like 8	1728.11	4144.57	2936.34	-2.39832	0.00808741	Yes	1828.03	2824.32	2326.18	-1.545	0.0168699	No
ENSG00000091073	113878	DTX2	deltex E3 ubiquitin ligase 2	65.6617	99.9356	82.7986	-1.52198	0.0620845	No	81.6359	162.484	122.06	-1.99035	8.52348e-05	No
ENSG00000091106	58484	NLRC4	NLR family CARD domain containing 4	34.8981	12.979	23.9385	2.68881	0.00336626	Yes	9.39504	3.47579	6.43541	2.70299	0.00208055	Yes
ENSG00000091127	54517	PUS7	pseudouridine synthase 7	177.332	255.479	216.406	-1.44068	0.11769	No	338.388	571.217	454.803	-1.68805	0.00063118	No
ENSG00000091128	22798	LAMB4	laminin subunit beta 4	1.07415	1.80434	1.43925	-1.67979	0.36199	No	1.18434	5.50543	3.34489	-4.64853	0.000312865	Yes
ENSG00000091129	4897	NRCAM	neuronal cell adhesion molecule	12909.6	9582.93	11246.3	1.34715	0.382547	No	14751.2	7010.72	10881	2.1041	0.000839948	Yes
ENSG00000091136	3912	LAMB1	laminin subunit beta 1	865.014	720.567	792.791	1.20046	0.500664	No	1776.08	1611.09	1693.59	1.10241	0.644875	No
ENSG00000091137	5172	SLC26A4	solute carrier family 26 member 4	207.956	100.118	154.037	2.07712	0.0799155	No	260.902	108.865	184.883	2.39656	0.160747	No
ENSG00000091140	1738	DLD	dihydrolipoamide dehydrogenase	1828.43	1477.05	1652.74	1.23789	0.280844	No	2485.38	1568.04	2026.71	1.58502	1.98264e-07	No
ENSG00000091157	23335	WDR7	WD repeat domain 7	3428.69	1749.9	2589.3	1.95936	0.0138196	No	3291.59	1258.09	2274.84	2.61635	3.28834e-07	Yes
ENSG00000091164	9352	TXNL1	thioredoxin like 1	2160.81	2876.19	2518.5	-1.33107	0.232039	No	3035.78	2798.8	2917.29	1.08467	0.240663	No
ENSG00000091181	3568	IL5RA	interleukin 5 receptor subunit alpha	1.36141	0.872415	1.11691	1.56051	0.394879	No	0.914702	2.54601	1.73036	-2.78343	0.0318204	Yes
ENSG00000091262	368	ABCC6	ATP binding cassette subfamily C member 6	14.2178	2.00901	8.1134	7.07701	0.00153453	Yes	13.5357	6.35318	9.94446	2.13055	0.0288056	Yes
ENSG00000091317	54918	CMTM6	CKLF like MARVEL transmembrane domain containing 6	234.937	364.389	299.663	-1.55101	0.0936733	No	327.72	653.739	490.729	-1.99481	1.32851e-05	No
ENSG00000091409	3655	ITGA6	integrin subunit alpha 6	557.627	333.78	445.703	1.67064	0.264512	No	703.603	989.884	846.744	-1.40688	0.159163	No
ENSG00000091428	11069	RAPGEF4	Rap guanine nucleotide exchange factor 4	10209.5	87.1649	5148.31	117.128	2.0989e-15	Yes	10621.8	269.534	5445.69	39.4082	6.33379e-14	Yes
ENSG00000091436	51776	MAP3K20	mitogen-activated protein kinase kinase kinase 20	265.817	173.371	219.594	1.53323	0.211923	No	301.491	412.884	357.187	-1.36947	0.129684	No
ENSG00000091482	23676	SMPX	small muscle protein X-linked	38.3687	0.832832	19.6008	46.0702	6.04083e-08	Yes	69.58	1.45248	35.5162	47.9042	5.61289e-13	Yes
ENSG00000091483	2271	FH	fumarate hydratase	1345.45	1634.85	1490.15	-1.21509	0.298246	No	1997.9	1631.32	1814.61	1.22471	0.0197036	No
ENSG00000091490	23231	SEL1L3	SEL1L family member 3	643.048	3076.83	1859.94	-4.78476	1.9118e-06	Yes	717.1	2347.39	1532.24	-3.27345	0.00137315	Yes
ENSG00000091513	7018	TF	transferrin	10671.6	77.9727	5374.79	136.863	5.39628e-11	Yes	8222.71	180.206	4201.46	45.6296	1.46411e-12	Yes
ENSG00000091527	55573	CDV3	CDV3 homolog	2069.08	3931.99	3000.54	-1.90036	0.00125389	No	2839.18	4180.26	3509.72	-1.47235	0.000171777	No
ENSG00000091536	51168	MYO15A	myosin XVA	173.708	50.2197	111.964	3.45896	0.00665177	Yes	321.92	221.436	271.678	1.45379	0.169758	No
ENSG00000091542	54890	ALKBH5	alkB homolog 5, RNA demethylase	2630.37	1947.12	2288.74	1.3509	0.0569244	No	2638.8	2180.3	2409.55	1.21029	0.0130635	No
ENSG00000091592	22861	NLRP1	NLR family pyrin domain containing 1	6451.98	4979.05	5715.51	1.29583	0.165441	No	7386.69	3534.47	5460.58	2.0899	4.81507e-06	Yes
ENSG00000091622	83394	PITPNM3	PITPNM family member 3	4296.72	158.858	2227.79	27.0475	1.39581e-07	Yes	4225.46	358.994	2292.23	11.7703	5.56042e-10	Yes
ENSG00000091640	9552	SPAG7	sperm associated antigen 7	899.902	918.004	908.953	-1.02012	0.923612	No	1867.75	1167.1	1517.42	1.60033	0.00132378	No
ENSG00000091651	23594	ORC6	origin recognition complex subunit 6	62.7538	132.517	97.6354	-2.11169	0.0449562	Yes	118.347	416.902	267.624	-3.5227	6.63569e-05	Yes
ENSG00000091656	79776	ZFHX4	zinc finger homeobox 4	229.091	184.014	206.553	1.24497	0.780875	No	260.465	1352.85	806.657	-5.19398	0.00150541	Yes
ENSG00000091664	57084	SLC17A6	solute carrier family 17 member 6	326.42	170.998	248.709	1.90891	0.0963373	No	342.183	508.999	425.591	-1.48751	0.426595	No
ENSG00000091732	51530	ZC3HC1	zinc finger C3HC-type containing 1	262.315	465.711	364.013	-1.77539	0.000593832	No	363.507	587.55	475.529	-1.61634	0.000181086	No
ENSG00000091831	2099	ESR1	estrogen receptor 1	20.4704	3.61791	12.0442	5.65808	0.00267591	Yes	15.9567	0.982076	8.4694	16.248	1.09243e-09	Yes
ENSG00000091844	26575	RGS17	regulator of G protein signaling 17	208.038	891.504	549.771	-4.2853	0.000232169	Yes	296.138	859.571	577.855	-2.9026	0.000171521	Yes
ENSG00000091879	285	ANGPT2	angiopoietin 2	66.4139	82.0121	74.213	-1.23486	0.578156	No	65.0085	125.059	95.0335	-1.92373	0.00904768	No
ENSG00000091947	84336	TMEM101	transmembrane protein 101	416.894	450.637	433.766	-1.08094	0.718868	No	410.47	437.627	424.048	-1.06616	0.639142	No
ENSG00000091972	4345	CD200	CD200 molecule	2767.28	3339.76	3053.52	-1.20687	0.417442	No	3198.49	3098.97	3148.73	1.03211	0.80345	No
ENSG00000091986	151887	CCDC80	coiled-coil domain containing 80	124.638	47.1446	85.8915	2.64374	0.100928	No	159.172	130.862	145.017	1.21633	0.65648	No
ENSG00000092010	5720	PSME1	proteasome activator subunit 1	781.89	815.278	798.584	-1.0427	0.867231	No	1015.57	930.14	972.857	1.09185	0.539697	No
ENSG00000092020	55012	PPP2R3C	protein phosphatase 2 regulatory subunit B''gamma	503.451	631.867	567.659	-1.25507	0.353679	No	804.504	984.686	894.595	-1.22397	0.0457809	No
ENSG00000092036	54930	HAUS4	HAUS augmin like complex subunit 4	64.9041	167.46	116.182	-2.58011	0.00113278	Yes	70.6186	208.061	139.34	-2.94627	1.09502e-06	Yes
ENSG00000092051	84502	JPH4	junctophilin 4	9622.16	4472.63	7047.39	2.15134	0.00831711	Yes	10838.5	5923.47	8381.01	1.82976	8.59242e-05	No
ENSG00000092054	4625	MYH7	myosin heavy chain 7	94.2923	5.75792	50.0251	16.3761	7.45647e-05	Yes	190.184	54.2836	122.234	3.50353	0.0945096	No
ENSG00000092068	23428	SLC7A8	solute carrier family 7 member 8	1169.32	189.902	679.612	6.15752	3.53214e-07	Yes	1098.21	211.412	654.812	5.19466	2.12996e-10	Yes
ENSG00000092094	55644	OSGEP	O-sialoglycoprotein endopeptidase	463.877	468.296	466.086	-1.00953	0.972149	No	1301.52	1673.33	1487.43	-1.28567	0.110708	No
ENSG00000092096	51310	SLC22A17	solute carrier family 22 member 17	15927.7	4890.29	10409	3.257	1.20999e-06	Yes	14436.4	5628.51	10032.4	2.56486	2.46428e-08	Yes
ENSG00000092098	55072	RNF31	ring finger protein 31	313.513	332.267	322.89	-1.05982	0.764824	No	276.639	340.26	308.449	-1.22998	0.0634501	No
ENSG00000092108	23256	SCFD1	sec1 family domain containing 1	894.63	1098.62	996.626	-1.22802	0.303208	No	1477.91	1371.8	1424.86	1.07735	0.229813	No
ENSG00000092140	55632	G2E3	G2/M-phase specific E3 ubiquitin protein ligase	239.737	907.595	573.666	-3.78579	3.18858e-05	Yes	329.116	1338.12	833.619	-4.06582	3.29962e-09	Yes
ENSG00000092148	25831	HECTD1	HECT domain E3 ubiquitin protein ligase 1	3506.24	4690.87	4098.55	-1.33786	0.209477	No	3464.88	4131.9	3798.39	-1.19251	0.17296	No
ENSG00000092199	3183	HNRNPC	heterogeneous nuclear ribonucleoprotein C (C1/C2)	4473.67	11345.6	7909.62	-2.53608	0.00014181	Yes	6727.7	14319.5	10523.6	-2.12844	1.29507e-09	Yes
ENSG00000092200	57096	RPGRIP1	RPGR interacting protein 1	8.33442	10.1301	9.23225	-1.21545	0.634769	No	5.88171	8.46324	7.17248	-1.43891	0.395734	No
ENSG00000092201	11198	SUPT16H	SPT16 homolog, facilitates chromatin remodeling subunit	2339.24	5859.73	4099.48	-2.50497	1.26196e-05	Yes	3209.33	6079.89	4644.61	-1.89444	1.4203e-10	No
ENSG00000092203	9878	TOX4	TOX high mobility group box family member 4	1992.1	1938.27	1965.18	1.02777	0.86259	No	2544.28	2226.31	2385.3	1.14283	0.045933	No
ENSG00000092208	8487	GEMIN2	gem nuclear organelle associated protein 2	153.692	270.739	212.215	-1.76157	0.0130868	No	253.412	406.227	329.82	-1.60303	3.40111e-05	No
ENSG00000092295	7051	TGM1	transglutaminase 1	16.9628	10.6822	13.8225	1.58795	0.448035	No	59.4624	109.941	84.7015	-1.84891	0.0036955	No
ENSG00000092330	26277	TINF2	TERF1 interacting nuclear factor 2	863.567	1562.37	1212.97	-1.80921	0.000161412	No	1103.37	1490.66	1297.02	-1.35101	0.00234737	No
ENSG00000092345	1618	DAZL	deleted in azoospermia like	1.97122	0.85972	1.41547	2.29287	0.0676581	No	4.27342	1.09431	2.68386	3.90513	0.00434825	Yes
ENSG00000092377	90665	TBL1Y	transducin beta like 1 Y-linked	1.09312	3.41037	2.25175	-3.11984	0.210918	No	1.69317	6.58559	4.13938	-3.88951	0.0469182	Yes
ENSG00000092421	57556	SEMA6A	semaphorin 6A	1076.1	1562.06	1319.08	-1.4516	0.244356	No	1162.49	2656.16	1909.32	-2.2849	3.59028e-05	Yes
ENSG00000092439	54822	TRPM7	transient receptor potential cation channel subfamily M member 7	315.515	410.078	362.796	-1.29971	0.249174	No	575.18	954.278	764.729	-1.6591	0.000739253	No
ENSG00000092445	7301	TYRO3	TYRO3 protein tyrosine kinase	6985.86	1201.93	4093.9	5.81221	3.93025e-10	Yes	7240.39	1306.35	4273.37	5.54246	5.8763e-17	Yes
ENSG00000092470	79968	WDR76	WD repeat domain 76	48.0336	370.173	209.103	-7.70653	9.55327e-07	Yes	68.8004	684.836	376.818	-9.95395	1.62567e-10	Yes
ENSG00000092529	825	CAPN3	calpain 3	106.932	1.1148	54.0233	95.9203	4.99368e-08	Yes	110.082	14.9332	62.5077	7.37163	5.99904e-11	Yes
ENSG00000092531	8773	SNAP23	synaptosome associated protein 23	146.141	81.1963	113.669	1.79985	0.0533251	No	372.935	399.69	386.312	-1.07174	0.647835	No
ENSG00000092607	6913	TBX15	T-box 15	16.6276	25.7281	21.1778	-1.54731	0.438037	No	22.8089	41.3386	32.0737	-1.81239	0.146797	No
ENSG00000092621	26227	PHGDH	phosphoglycerate dehydrogenase	1658.77	575.224	1117	2.88369	0.0676706	No	1898.81	1866.33	1882.57	1.0174	0.974808	No
ENSG00000092758	1299	COL9A3	collagen type IX alpha 3 chain	704.495	332.956	518.726	2.11588	0.0816694	No	714.386	938.762	826.574	-1.31408	0.526278	No
ENSG00000092820	7430	EZR	ezrin	1557.38	5953.43	3755.4	-3.82272	9.30197e-06	Yes	2162.75	5874.58	4018.66	-2.71626	0.000762428	Yes
ENSG00000092841	4637	MYL6	myosin light chain 6	4700.96	5781.86	5241.41	-1.22993	0.408148	No	5952.97	6919.25	6436.11	-1.16232	0.383035	No
ENSG00000092847	26523	AGO1	argonaute RISC component 1	1520.2	2332.51	1926.35	-1.53435	0.0890688	No	1497.93	3687.17	2592.55	-2.46151	6.58605e-08	Yes
ENSG00000092850	27285	TEKT2	tektin 2	25.2493	186.181	105.715	-7.37369	5.23778e-07	Yes	56.891	536.359	296.625	-9.42784	8.85043e-13	Yes
ENSG00000092853	63967	CLSPN	claspin	41.1871	74.8443	58.0157	-1.81718	0.215532	No	52.5364	257.149	154.842	-4.89467	0.0017724	Yes
ENSG00000092871	117584	RFFL	ring finger and FYVE like domain containing E3 ubiquitin protein ligase	396.351	494.925	445.638	-1.24871	0.419594	No	585.108	927.754	756.431	-1.58561	0.0226678	No
ENSG00000092929	201294	UNC13D	unc-13 homolog D	55.9832	11.0412	33.5122	5.07038	0.0017872	Yes	95.1518	63.6782	79.415	1.49426	0.0114474	No
ENSG00000092931	79157	MFSD11	major facilitator superfamily domain containing 11	284.864	245.799	265.331	1.15893	0.347677	No	365.197	454.017	409.607	-1.24321	0.0456117	No
ENSG00000092964	1808	DPYSL2	dihydropyrimidinase like 2	26426.1	36556.3	31491.2	-1.38334	0.121869	No	20489.4	26867.5	23678.5	-1.31129	0.0855646	No
ENSG00000092969	7042	TGFB2	transforming growth factor beta 2	287.336	309.525	298.431	-1.07722	0.908312	No	478.009	249.228	363.619	1.91796	0.136855	No
ENSG00000092978	55105	GPATCH2	G-patch domain containing 2	282.256	457.561	369.909	-1.62108	0.0284377	No	379.48	527.447	453.464	-1.38992	0.0038049	No
ENSG00000093000	10762	NUP50	nucleoporin 50	1008.47	1495.28	1251.88	-1.48272	0.0174266	No	1497.3	2040.65	1768.97	-1.36289	0.000585856	No
ENSG00000093009	8318	CDC45	cell division cycle 45	3.51742	91.9373	47.7274	-26.1377	4.96799e-05	Yes	5.20972	345.46	175.335	-66.3107	1.36878e-06	Yes
ENSG00000093010	1312	COMT	catechol-O-methyltransferase	1225.34	1014.82	1120.08	1.20745	0.312101	No	1231.28	973.02	1102.15	1.26542	0.115687	No
ENSG00000093072	51816	ADA2	adenosine deaminase 2	92.1773	41.2962	66.7367	2.2321	0.0402891	Yes	81.4391	209.861	145.65	-2.5769	0.000671624	Yes
ENSG00000093100	---	---	---	2.09123	0.818055	1.45464	2.55634	0.0649014	No	4.01978	3.55589	3.78784	1.13046	0.771019	No
ENSG00000093144	55862	ECHDC1	ethylmalonyl-CoA decarboxylase 1	779.315	790.956	785.136	-1.01494	0.956193	No	1187.07	1130.37	1158.72	1.05016	0.660092	No
ENSG00000093167	9209	LRRFIP2	LRR binding FLII interacting protein 2	683.7	764.518	724.109	-1.11821	0.566384	No	1800.37	1806.41	1803.39	-1.00335	0.975507	No
ENSG00000093183	9117	SEC22C	SEC22 homolog C, vesicle trafficking protein	1304.68	1225.47	1265.07	1.06463	0.656097	No	1471.45	1495.35	1483.4	-1.01624	0.838885	No
ENSG00000093217	9942	XYLB	xylulokinase	58.456	51.3569	54.9064	1.13823	0.691392	No	50.5388	75.4077	62.9733	-1.49207	0.0273263	No
ENSG00000094631	10013	HDAC6	histone deacetylase 6	1165.55	2311.36	1738.46	-1.98306	0.000789689	No	2317.16	4384.84	3351	-1.89234	1.69714e-09	No
ENSG00000094755	2568	GABRP	gamma-aminobutyric acid type A receptor pi subunit	0.743159	1.46852	1.10584	-1.97605	0.370461	No	1.00876	4.62123	2.815	-4.58109	0.00313363	Yes
ENSG00000094796	3881	KRT31	keratin 31	51.8926	496.591	274.242	-9.5696	0.0161661	Yes	67.916	25.6437	46.7799	2.64845	0.149317	No
ENSG00000094804	990	CDC6	cell division cycle 6	91.5493	78.0493	84.7993	1.17297	0.798993	No	128.73	318.074	223.402	-2.47086	0.0164762	Yes
ENSG00000094841	139596	UPRT	uracil phosphoribosyltransferase homolog	314.985	375.005	344.995	-1.19055	0.412431	No	359.048	362.752	360.9	-1.01031	0.92023	No
ENSG00000094880	8697	CDC23	cell division cycle 23	499.18	639.334	569.257	-1.28077	0.161953	No	676.9	937.462	807.181	-1.38493	0.000117157	No
ENSG00000094914	8086	AAAS	aladin WD repeat nucleoporin	538.997	1220.43	879.713	-2.26426	0.000133496	Yes	947.415	1786.36	1366.89	-1.88551	3.72522e-06	No
ENSG00000094916	23468	CBX5	chromobox 5	3384.4	9518.58	6451.49	-2.81249	2.54897e-05	Yes	3088.65	10821	6954.82	-3.50347	3.68867e-12	Yes
ENSG00000094963	2327	FMO2	flavin containing monooxygenase 2	17.0723	0.804863	8.93856	21.2114	6.16116e-07	Yes	20.2429	1.01926	10.6311	19.8604	1.06002e-10	Yes
ENSG00000094975	51430	SUCO	SUN domain containing ossification factor	510.684	1642.01	1076.35	-3.21532	2.26982e-06	Yes	773.138	1999.93	1386.53	-2.58677	3.78806e-09	Yes
ENSG00000095002	4436	MSH2	mutS homolog 2	851.736	1606.18	1228.96	-1.88577	0.0049921	No	1078.7	1948.41	1513.55	-1.80625	1.8781e-06	No
ENSG00000095015	4214	MAP3K1	mitogen-activated protein kinase kinase kinase 1	142.327	238.68	190.503	-1.67699	0.0722416	No	173.291	479.931	326.611	-2.76951	1.40537e-07	Yes
ENSG00000095059	1725	DHPS	deoxyhypusine synthase	1251.28	2548.59	1899.93	-2.03678	0.000173877	Yes	2077.44	2874.02	2475.73	-1.38344	0.00348997	No
ENSG00000095066	29911	HOOK2	hook microtubule tethering protein 2	306.224	293.083	299.654	1.04484	0.874904	No	680.008	634.217	657.112	1.0722	0.684417	No
ENSG00000095139	372	ARCN1	archain 1	2829.81	3126.43	2978.12	-1.10482	0.537767	No	3181.29	3158.38	3169.83	1.00725	0.939679	No
ENSG00000095203	54566	EPB41L4B	erythrocyte membrane protein band 4.1 like 4B	1350.61	48.0037	699.307	28.1356	3.13637e-09	Yes	1936.78	165.094	1050.94	11.7314	4.37139e-07	Yes
ENSG00000095209	55151	TMEM38B	transmembrane protein 38B	164.87	145.254	155.062	1.13504	0.627464	No	150.257	220.974	185.615	-1.47064	0.0563385	No
ENSG00000095261	5711	PSMD5	proteasome 26S subunit, non-ATPase 5	338.001	412.48	375.24	-1.22035	0.26291	No	610.597	759.698	685.147	-1.24419	0.00977644	No
ENSG00000095303	5742	PTGS1	prostaglandin-endoperoxide synthase 1	74.0677	14.6235	44.3456	5.06496	0.000431585	Yes	68.2852	24.9889	46.637	2.73263	4.15389e-05	Yes
ENSG00000095319	23511	NUP188	nucleoporin 188	597.97	1823.66	1210.81	-3.04975	5.03345e-06	Yes	701.792	2084.16	1392.97	-2.96976	2.77207e-12	Yes
ENSG00000095321	1384	CRAT	carnitine O-acetyltransferase	1417.69	1139.8	1278.75	1.2438	0.247931	No	1599.26	1070.88	1335.07	1.49341	0.000547887	No
ENSG00000095370	10044	SH2D3C	SH2 domain containing 3C	679.306	688.289	683.797	-1.01322	0.959277	No	642.67	739.198	690.934	-1.1502	0.363202	No
ENSG00000095380	54187	NANS	N-acetylneuraminate synthase	389.818	370.496	380.157	1.05215	0.800197	No	676.165	377.268	526.716	1.79227	1.69903e-05	No
ENSG00000095383	55357	TBC1D2	TBC1 domain family member 2	133.664	40.6156	87.1398	3.29095	0.00230622	Yes	248.337	122.025	185.181	2.03512	2.22009e-05	Yes
ENSG00000095397	25861	WHRN	whirlin	563.115	57.8149	310.465	9.73995	7.98394e-05	Yes	560.232	379.594	469.913	1.47587	0.254422	No
ENSG00000095485	55280	CWF19L1	CWF19 like cell cycle control factor 1	291.948	356.244	324.096	-1.22023	0.245869	No	517.632	638.785	578.208	-1.23405	0.00590229	No
ENSG00000095539	57715	SEMA4G	semaphorin 4G	182.916	1060.09	621.502	-5.79551	6.32719e-05	Yes	380.082	1366.39	873.236	-3.59499	8.19311e-07	Yes
ENSG00000095564	9044	BTAF1	B-TFIID TATA-box binding protein associated factor 1	654.958	1145.82	900.391	-1.74946	0.00960372	No	924.775	1847.17	1385.97	-1.99742	9.18911e-05	No
ENSG00000095574	64376	IKZF5	IKAROS family zinc finger 5	597.699	533.869	565.784	1.11956	0.601916	No	630.235	739.668	684.951	-1.17364	0.273832	No
ENSG00000095585	29760	BLNK	B cell linker	27.3716	3.56327	15.4674	7.6816	0.00018071	Yes	46.8737	7.31813	27.0959	6.40515	3.57096e-06	Yes
ENSG00000095587	7093	TLL2	tolloid like 2	209.07	8.56069	108.816	24.4221	3.2394e-09	Yes	181.489	28.4714	104.98	6.37445	0.000104512	Yes
ENSG00000095596	1592	CYP26A1	cytochrome P450 family 26 subfamily A member 1	95.4481	1360.36	727.905	-14.2524	8.73329e-11	Yes	64.1001	143.858	103.979	-2.24427	0.10297	No
ENSG00000095627	56165	TDRD1	tudor domain containing 1	10.521	3.00042	6.76073	3.50652	0.0104077	Yes	10.7805	3.97067	7.37557	2.71502	5.39352e-05	Yes
ENSG00000095637	10580	SORBS1	sorbin and SH3 domain containing 1	3625.65	2353.61	2989.63	1.54046	0.0948116	No	5306.79	3320.66	4313.72	1.59812	0.0171108	No
ENSG00000095713	55118	CRTAC1	cartilage acidic protein 1	1051.18	43.689	547.435	24.0606	2.08795e-05	Yes	1209.53	127.124	668.325	9.51453	2.1567e-06	Yes
ENSG00000095739	25805	BAMBI	BMP and activin membrane bound inhibitor	278	55.3438	166.672	5.02314	1.27012e-06	Yes	248.794	76.6321	162.713	3.2466	2.64649e-05	Yes
ENSG00000095752	3589	IL11	interleukin 11	6.90754	5.81809	6.36281	1.18725	0.750473	No	15.9455	19.0614	17.5034	-1.19541	0.414463	No
ENSG00000095777	53904	MYO3A	myosin IIIA	5.87872	24.737	15.3078	-4.20789	0.117841	No	8.40181	170.847	89.6242	-20.3345	0.000560045	Yes
ENSG00000095787	51322	WAC	WW domain containing adaptor with coiled-coil	4847.91	3817.92	4332.91	1.26978	0.0844654	No	5256.96	4815.67	5036.32	1.09164	0.343137	No
ENSG00000095794	1390	CREM	cAMP responsive element modulator	507.372	251.331	379.352	2.01874	0.00738579	Yes	830.968	354.582	592.775	2.34351	5.63039e-07	Yes
ENSG00000095906	10101	NUBP2	nucleotide binding protein 2	741.283	1531.72	1136.5	-2.0663	0.000871315	Yes	565.09	1471.39	1018.24	-2.60383	3.21661e-05	Yes
ENSG00000095917	23430	TPSD1	tryptase delta 1	2.09007	0.594709	1.34239	3.51444	0.00624588	Yes	11.2253	1.34914	6.28722	8.32036	5.28925e-07	Yes
ENSG00000095932	284422	SMIM24	small integral membrane protein 24	113.806	1.09089	57.4483	104.324	1.38418e-08	Yes	150.464	1.92002	76.1921	78.3658	2.33542e-14	Yes
ENSG00000095951	3096	HIVEP1	human immunodeficiency virus type I enhancer binding protein 1	875.156	753.198	814.177	1.16192	0.683998	No	894.357	984.149	939.253	-1.1004	0.644372	No
ENSG00000095970	54209	TREM2	triggering receptor expressed on myeloid cells 2	68.7426	34.7609	51.7518	1.97758	0.0682085	No	87.8177	34.2334	61.0255	2.56526	0.00565266	Yes
ENSG00000096060	2289	FKBP5	FKBP prolyl isomerase 5	176.165	220.39	198.278	-1.25104	0.520077	No	440.704	309.919	375.311	1.422	0.216953	No
ENSG00000096063	6732	SRPK1	SRSF protein kinase 1	971.194	2879.82	1925.51	-2.96524	6.3825e-06	Yes	1377.48	2957.24	2167.36	-2.14685	2.59502e-11	Yes
ENSG00000096070	27154	BRPF3	bromodomain and PHD finger containing 3	1805.04	1529.56	1667.3	1.1801	0.488968	No	1735.79	2312.53	2024.16	-1.33226	0.00833208	No
ENSG00000096080	55168	MRPS18A	mitochondrial ribosomal protein S18A	272.135	184.09	228.113	1.47827	0.0708393	No	945.623	378.641	662.132	2.49741	8.57342e-08	Yes
ENSG00000096088	5225	PGC	progastricsin	1.24193	0.724569	0.983249	1.71402	0.296836	No	6.67566	1.32463	4.00014	5.03964	5.06272e-06	Yes
ENSG00000096092	28978	TMEM14A	transmembrane protein 14A	1228.03	1014.9	1121.47	1.21	0.504414	No	1732.5	1015.57	1374.03	1.70594	0.000169826	No
[truncated: 21,959 more rows]

## Sheet: CB_DE_A_vs_EP
ensembl	entrez	symbol	genename	mean.A.BS	mean.EP.BS	mean.both.BS	foldChange.BS	padj.BS	diffExpr.BS	mean.A.CD	mean.EP.CD	mean.both.CD	foldChange.CD	padj.CD	diffExpr.CD
ENSG00000000003	7105	TSPAN6	tetraspanin 6	120.147	1292.37	706.257	-10.7566	4.44417e-08	Yes	140.54	1233.03	686.787	-8.77354	1.56548e-15	Yes
ENSG00000000005	64102	TNMD	tenomodulin	0.705995	6.30593	3.50596	-8.93198	0.00151002	Yes	0.839291	12.7395	6.7894	-15.1789	6.22112e-10	Yes
ENSG00000000419	8813	DPM1	dolichyl-phosphate mannosyltransferase subunit 1, catalytic	304.928	354.956	329.942	-1.16407	0.570476	No	748.135	571.953	660.044	1.30804	0.00902999	No
ENSG00000000457	57147	SCYL3	SCY1 like pseudokinase 3	217.426	217.735	217.58	-1.00142	0.995595	No	430.259	414.229	422.244	1.0387	0.666312	No
ENSG00000000460	55732	C1orf112	chromosome 1 open reading frame 112	40.4553	107.07	73.7627	-2.64663	0.00112102	Yes	296.026	291.883	293.954	1.0142	0.929807	No
ENSG00000000938	2268	FGR	FGR proto-oncogene, Src family tyrosine kinase	87.773	24.7362	56.2546	3.54836	0.000528711	Yes	121.509	34.9056	78.2072	3.48107	1.25586e-06	Yes
ENSG00000000971	3075	CFH	complement factor H	207.956	63.1411	135.549	3.29352	0.039694	Yes	332.57	203.247	267.908	1.63629	0.256762	No
ENSG00000001036	2519	FUCA2	alpha-L-fucosidase 2	297.377	403.424	350.4	-1.35661	0.23157	No	416.632	458.225	437.429	-1.09983	0.340196	No
ENSG00000001084	2729	GCLC	glutamate-cysteine ligase catalytic subunit	522.246	525.185	523.715	-1.00563	0.984228	No	918.173	755.107	836.64	1.21595	0.0522377	No
ENSG00000001167	4800	NFYA	nuclear transcription factor Y subunit alpha	645.815	1040.78	843.298	-1.61158	0.0340946	No	798.89	1266.18	1032.53	-1.58492	0.00113652	No
ENSG00000001460	90529	STPG1	sperm tail PG-rich repeat containing 1	713.282	645.328	679.305	1.1053	0.599494	No	804.071	533.876	668.974	1.5061	0.0325433	No
ENSG00000001461	57185	NIPAL3	NIPA like domain containing 3	6510.3	676.413	3593.36	9.62473	2.19361e-08	Yes	6162.79	806.613	3484.7	7.64032	7.66713e-12	Yes
ENSG00000001497	81887	LAS1L	LAS1 like, ribosome biogenesis factor	648.785	634.416	641.601	1.02265	0.920284	No	2976.24	1659.68	2317.96	1.79326	7.51867e-06	No
ENSG00000001561	22875	ENPP4	ectonucleotide pyrophosphatase/phosphodiesterase 4	615.435	530.51	572.973	1.16008	0.701276	No	892.549	562.447	727.498	1.5869	0.0197107	No
ENSG00000001617	6405	SEMA3F	semaphorin 3F	221.646	1090.13	655.886	-4.91832	6.71697e-05	Yes	197.947	1271.81	734.879	-6.42501	2.40931e-09	Yes
ENSG00000001626	1080	CFTR	cystic fibrosis transmembrane conductance regulator	5.83098	40.8466	23.3388	-7.0051	0.00078372	Yes	9.76907	23.0217	16.3954	-2.35659	0.0643923	No
ENSG00000001629	54467	ANKIB1	ankyrin repeat and IBR domain containing 1	1085.61	2201.51	1643.56	-2.0279	0.00465477	Yes	1440.22	3234.32	2337.27	-2.24571	9.62495e-07	Yes
ENSG00000001630	1595	CYP51A1	cytochrome P450 family 51 subfamily A member 1	97.2407	203.452	150.346	-2.09225	0.0522748	No	19.1601	53.1069	36.1335	-2.77175	0.0028564	Yes
ENSG00000001631	889	KRIT1	KRIT1 ankyrin repeat containing	442.763	449.29	446.026	-1.01474	0.950582	No	1161.42	700.918	931.167	1.65699	3.96206e-05	No
ENSG00000002016	5893	RAD52	RAD52 homolog, DNA repair protein	155.774	97.9224	126.848	1.59079	0.125651	No	716.822	674.733	695.777	1.06238	0.646993	No
ENSG00000002330	572	BAD	BCL2 associated agonist of cell death	647.741	577.07	612.406	1.12246	0.755652	No	661.313	591.517	626.415	1.118	0.679668	No
ENSG00000002549	51056	LAP3	leucine aminopeptidase 3	695.808	612.789	654.299	1.13548	0.536846	No	748.211	540.875	644.543	1.38333	0.00373159	No
ENSG00000002587	9957	HS3ST1	heparan sulfate-glucosamine 3-sulfotransferase 1	1629.34	67.945	848.643	23.9803	1.82297e-10	Yes	1289.76	151.975	720.867	8.48663	2.19658e-10	Yes
ENSG00000002745	51384	WNT16	Wnt family member 16	34.2975	34.6427	34.4701	-1.01006	0.984871	No	17.9153	14.2098	16.0625	1.26077	0.637683	No
ENSG00000002746	23072	HECW1	HECT, C2 and WW domain containing E3 ubiquitin protein ligase 1	1031.02	1686.97	1358.99	-1.63621	0.0623701	No	882.608	1924.32	1403.46	-2.18027	4.42364e-07	Yes
ENSG00000002822	8379	MAD1L1	mitotic arrest deficient 1 like 1	470.024	714.618	592.321	-1.52039	0.0783053	No	366.164	555.799	460.981	-1.5179	0.0167251	No
ENSG00000002834	3927	LASP1	LIM and SH3 protein 1	2219.95	6066.92	4143.44	-2.73291	8.86427e-05	Yes	2187.77	5755.01	3971.39	-2.63054	4.40034e-14	Yes
ENSG00000002919	29916	SNX11	sorting nexin 11	832.242	468.265	650.254	1.77729	0.0181128	No	438.526	465.996	452.261	-1.06264	0.616636	No
ENSG00000002933	55365	TMEM176A	transmembrane protein 176A	92.3931	7.03889	49.716	13.1261	0.000184632	Yes	90.8853	27.403	59.1441	3.31661	0.000362397	Yes
ENSG00000003056	4074	M6PR	mannose-6-phosphate receptor, cation dependent	835.099	475.989	655.544	1.75445	0.00193176	No	1216.39	682.858	949.624	1.78132	1.85482e-08	No
ENSG00000003096	90293	KLHL13	kelch like family member 13	439.634	2030.07	1234.85	-4.61764	1.17122e-06	Yes	300.719	1926.89	1113.8	-6.40761	9.29729e-10	Yes
ENSG00000003137	56603	CYP26B1	cytochrome P450 family 26 subfamily B member 1	5194.46	4890.42	5042.44	1.06217	0.870834	No	3123.63	2143.92	2633.77	1.45697	0.470004	No
ENSG00000003147	3382	ICA1	islet cell autoantigen 1	849.233	211.871	530.552	4.00825	4.95384e-07	Yes	1667.37	565.628	1116.5	2.94783	4.74471e-09	Yes
ENSG00000003249	79007	DBNDD1	dysbindin domain containing 1	2203.28	1674.64	1938.96	1.31568	0.172184	No	1434.48	1484.79	1459.63	-1.03508	0.801031	No
ENSG00000003393	57679	ALS2	alsin Rho guanine nucleotide exchange factor ALS2	4935.64	1456.18	3195.91	3.38945	8.82489e-05	Yes	11439.6	1869.3	6654.43	6.11969	1.21741e-21	Yes
ENSG00000003400	843	CASP10	caspase 10	43.2136	26.6562	34.9349	1.62115	0.143654	No	66.2561	58.4707	62.3634	1.13315	0.483279	No
ENSG00000003402	8837	CFLAR	CASP8 and FADD like apoptosis regulator	710.172	369.903	540.038	1.91989	0.00314336	No	4209.84	958.729	2584.28	4.39106	1.84833e-14	Yes
ENSG00000003436	7035	TFPI	tissue factor pathway inhibitor	47.1265	424.933	236.03	-9.01685	2.36206e-06	Yes	60.0521	774.437	417.245	-12.8961	1.88176e-06	Yes
ENSG00000003509	55471	NDUFAF7	NADH:ubiquinone oxidoreductase complex assembly factor 7	186.544	186.441	186.492	1.00055	0.998268	No	544.457	530.347	537.402	1.0266	0.786017	No
ENSG00000003756	10181	RBM5	RNA binding motif protein 5	1872.43	1560.08	1716.26	1.20022	0.336571	No	7550.41	8532.56	8041.48	-1.13008	0.285936	No
ENSG00000003987	9108	MTMR7	myotubularin related protein 7	544.899	380.15	462.524	1.43338	0.199216	No	935.724	1013.83	974.777	-1.08347	0.559953	No
ENSG00000003989	6542	SLC7A2	solute carrier family 7 member 2	100.82	39.8366	70.3281	2.53082	0.0518769	No	185.261	77.2205	131.241	2.39912	0.00499619	Yes
ENSG00000004059	381	ARF5	ADP ribosylation factor 5	4513.28	3325.32	3919.3	1.35724	0.23732	No	2616.59	1808.1	2212.34	1.44715	0.00268717	No
ENSG00000004139	23098	SARM1	sterile alpha and TIR motif containing 1	283.063	548.666	415.865	-1.93831	0.00985559	No	1055.24	2258.83	1657.03	-2.14058	1.29263e-11	Yes
ENSG00000004142	26073	POLDIP2	DNA polymerase delta interacting protein 2	2465.76	2066.75	2266.26	1.19306	0.353515	No	2364.07	2010.66	2187.36	1.17577	0.048623	No
ENSG00000004399	23129	PLXND1	plexin D1	453.554	1719.08	1086.32	-3.79025	0.000588543	Yes	434.766	958.577	696.671	-2.20481	0.000298882	Yes
ENSG00000004455	204	AK2	adenylate kinase 2	717.283	607.62	662.452	1.18048	0.41149	No	2378.74	1096.69	1737.72	2.16901	2.08779e-10	Yes
ENSG00000004468	952	CD38	CD38 molecule	8.92673	19.7911	14.3589	-2.21706	0.333178	No	31.584	38.0626	34.8233	-1.20512	0.731192	No
ENSG00000004478	2288	FKBP4	FKBP prolyl isomerase 4	6748.12	2740.35	4744.24	2.4625	1.46415e-05	Yes	6793.07	3085.33	4939.2	2.20173	6.65489e-08	Yes
ENSG00000004487	23028	KDM1A	lysine demethylase 1A	1497.33	6380.5	3938.92	-4.26125	4.84883e-07	Yes	2515.59	7073.15	4794.37	-2.81173	2.06706e-09	Yes
ENSG00000004534	10180	RBM6	RNA binding motif protein 6	1263.76	1406.15	1334.95	-1.11268	0.601788	No	8139.14	5591.09	6865.11	1.45573	0.0310637	No
ENSG00000004660	84254	CAMKK1	calcium/calmodulin dependent protein kinase kinase 1	2260.09	744.695	1502.39	3.03492	1.97693e-05	Yes	3557.12	762.471	2159.8	4.66526	7.38397e-14	Yes
ENSG00000004700	5965	RECQL	RecQ like helicase	246.547	352.93	299.738	-1.43149	0.0783271	No	462.62	630.358	546.489	-1.36258	0.00522335	No
ENSG00000004766	55610	VPS50	VPS50 subunit of EARP/GARPII complex	779.86	822.806	801.333	-1.05507	0.855391	No	1275.62	1311.62	1293.62	-1.02822	0.834598	No
ENSG00000004776	126393	HSPB6	heat shock protein family B (small) member 6	73.6091	20.4813	47.0452	3.59396	0.0182844	Yes	182.767	44.9007	113.834	4.07047	4.1999e-08	Yes
ENSG00000004777	115703	ARHGAP33	Rho GTPase activating protein 33	888.655	5245.24	3066.95	-5.90245	1.22285e-07	Yes	1943.26	6162.46	4052.86	-3.17119	5.09214e-07	Yes
ENSG00000004779	4706	NDUFAB1	NADH:ubiquinone oxidoreductase subunit AB1	1514.75	1158.17	1336.46	1.30788	0.190237	No	1281.3	1030.93	1156.12	1.24286	0.059155	No
ENSG00000004799	5166	PDK4	pyruvate dehydrogenase kinase 4	120.024	204.812	162.418	-1.70642	0.332597	No	323.087	167.503	245.295	1.92885	0.0352498	No
ENSG00000004809	85413	SLC22A16	solute carrier family 22 member 16	0.959276	3.0575	2.00839	-3.1873	0.0495544	Yes	1.11325	5.16738	3.14032	-4.64169	0.000839053	Yes
ENSG00000004838	51364	ZMYND10	zinc finger MYND-type containing 10	34.759	227.191	130.975	-6.53619	0.0032291	Yes	129.324	237.864	183.594	-1.83928	0.00724444	No
ENSG00000004848	170302	ARX	aristaless related homeobox	2.07616	3.07274	2.57445	-1.48001	0.606954	No	1.5456	15.8542	8.6999	-10.2577	0.0159028	Yes
ENSG00000004864	10165	SLC25A13	solute carrier family 25 member 13	290.482	383.199	336.84	-1.31918	0.287711	No	360.882	553.388	457.135	-1.53343	0.000899222	No
ENSG00000004866	7982	ST7	suppression of tumorigenicity 7	1020.21	917.53	968.87	1.11191	0.635719	No	1378.26	1327.41	1352.84	1.0383	0.778134	No
ENSG00000004897	996	CDC27	cell division cycle 27	1051.07	1111.71	1081.39	-1.05769	0.838597	No	1624.54	1822.68	1723.61	-1.12196	0.1843	No
ENSG00000004939	6521	SLC4A1	solute carrier family 4 member 1 (Diego blood group)	8.33253	111.881	60.1068	-13.427	2.56733e-05	Yes	31.0212	129.826	80.4237	-4.18509	0.028875	Yes
ENSG00000004948	799	CALCR	calcitonin receptor	0.705519	4.67446	2.68999	-6.62557	0.00101254	Yes	1.02559	25.0531	13.0394	-24.4281	1.14935e-07	Yes
ENSG00000004961	3052	HCCS	holocytochrome c synthase	524.98	261.247	393.113	2.00951	0.000644684	Yes	503.895	298.094	400.995	1.69039	5.70173e-08	No
ENSG00000004975	1856	DVL2	dishevelled segment polarity protein 2	645.206	896.595	770.901	-1.38963	0.120443	No	1479.06	1226.82	1352.94	1.2056	0.164478	No
ENSG00000005001	64063	PRSS22	serine protease 22	269.179	1.24426	135.211	216.336	2.39059e-09	Yes	116.095	0.750318	58.4225	154.727	1.20916e-15	Yes
ENSG00000005007	5976	UPF1	UPF1 RNA helicase and ATPase	4528.98	3065.16	3797.07	1.47757	0.131836	No	4261.6	2325.65	3293.62	1.83243	1.71975e-06	No
ENSG00000005020	8935	SKAP2	src kinase associated phosphoprotein 2	261.973	73.4746	167.724	3.5655	5.81458e-05	Yes	334.327	344.419	339.373	-1.03019	0.944177	No
ENSG00000005022	292	SLC25A5	solute carrier family 25 member 5	5625.25	2839.5	4232.37	1.98107	0.00163075	No	3510.22	2298.25	2904.24	1.52735	0.00152264	No
ENSG00000005059	55013	MCUB	mitochondrial calcium uniporter dominant negative beta subunit	13.5	245.169	129.334	-18.1606	5.39938e-08	Yes	17.9173	128.421	73.1691	-7.1674	8.71235e-09	Yes
ENSG00000005075	5439	POLR2J	RNA polymerase II subunit J	464.391	494.198	479.295	-1.06418	0.848903	No	457.23	323.475	390.352	1.41349	0.0780147	No
ENSG00000005100	56919	DHX33	DEAH-box helicase 33	558.629	586.342	572.486	-1.04961	0.821159	No	848.357	726.388	787.373	1.16791	0.066866	No
ENSG00000005102	4222	MEOX1	mesenchyme homeobox 1	1.18108	4.53872	2.8599	-3.84286	0.0900521	No	0.525721	1.74442	1.13507	-3.31815	0.013694	Yes
ENSG00000005108	221981	THSD7A	thrombospondin type 1 domain containing 7A	264.659	2133.75	1199.2	-8.06225	3.71009e-07	Yes	263.051	3646.04	1954.55	-13.8606	5.84562e-14	Yes
ENSG00000005156	3980	LIG3	DNA ligase 3	675.645	943.905	809.775	-1.39704	0.0680929	No	881.407	1044.63	963.02	-1.18519	0.0990275	No
ENSG00000005175	79657	RPAP3	RNA polymerase II associated protein 3	424.796	421.388	423.092	1.00809	0.975843	No	486.835	603.922	545.378	-1.24051	0.104082	No
ENSG00000005187	6296	ACSM3	acyl-CoA synthetase medium chain family member 3	1.39765	3.45426	2.42596	-2.47149	0.14635	No	5.15573	5.99666	5.5762	-1.1631	0.710144	No
ENSG00000005189	81691	REXO5	RNA exonuclease 5	150.012	179.638	164.825	-1.1975	0.448607	No	204.837	233.618	219.227	-1.14051	0.237195	No
ENSG00000005194	57019	CIAPIN1	cytokine induced apoptosis inhibitor 1	1490.2	1598.61	1544.4	-1.07275	0.752087	No	1087.98	1436.92	1262.45	-1.32073	0.00535599	No
ENSG00000005206	56928	SPPL2B	signal peptide peptidase like 2B	1595.4	1073.2	1334.3	1.48658	0.104626	No	2498.69	1869.38	2184.03	1.33664	0.216204	No
ENSG00000005238	80256	FAM214B	family with sequence similarity 214 member B	486.388	687.145	586.767	-1.41275	0.0684266	No	906.241	1283.09	1094.67	-1.41584	0.00224328	No
ENSG00000005243	51226	COPZ2	coatomer protein complex subunit zeta 2	78.2177	20.3287	49.2732	3.84765	0.0164294	Yes	77.5231	22.053	49.788	3.51531	2.18789e-06	Yes
ENSG00000005249	5577	PRKAR2B	protein kinase cAMP-dependent type II regulatory subunit beta	691.031	4190.7	2440.87	-6.06442	1.68886e-06	Yes	792.245	5852.11	3322.18	-7.38674	4.53398e-16	Yes
ENSG00000005302	10943	MSL3	MSL complex subunit 3	639.328	719.85	679.589	-1.12595	0.536677	No	965.304	1005.43	985.368	-1.04157	0.561214	No
ENSG00000005339	1387	CREBBP	CREB binding protein	3456.59	4214.37	3835.48	-1.21923	0.519125	No	3876.65	4424.16	4150.4	-1.14123	0.117319	No
ENSG00000005379	9256	TSPOAP1	TSPO associated protein 1	1870.6	910.473	1390.54	2.05454	0.00661893	Yes	4485.89	3895.42	4190.66	1.15158	0.379955	No
ENSG00000005381	4353	MPO	myeloperoxidase	31.8011	42.7406	37.2709	-1.344	0.277136	No	35.5372	48.4345	41.9858	-1.36292	0.060928	No
ENSG00000005421	5444	PON1	paraoxonase 1	6.41596	0.905961	3.66096	7.08194	0.00793198	Yes	15.0081	2.37305	8.6906	6.32441	3.08501e-06	Yes
ENSG00000005436	6936	GCFC2	GC-rich sequence DNA-binding factor 2	123.355	218.13	170.742	-1.76832	0.0132173	No	457.613	537.441	497.527	-1.17445	0.174002	No
ENSG00000005448	84058	WDR54	WD repeat domain 54	475.245	631.17	553.207	-1.32809	0.305339	No	456.153	505.75	480.952	-1.10873	0.53107	No
ENSG00000005469	54677	CROT	carnitine O-octanoyltransferase	181.377	121.108	151.242	1.49765	0.0974045	No	328.512	248.652	288.582	1.32117	0.0102918	No
ENSG00000005471	5244	ABCB4	ATP binding cassette subfamily B member 4	11.8197	76.1372	43.9784	-6.44156	2.87131e-05	Yes	7.93043	57.0635	32.497	-7.19551	6.89216e-08	Yes
ENSG00000005483	55904	KMT2E	lysine methyltransferase 2E	2556.63	3221.23	2888.93	-1.25995	0.33047	No	4157.77	5039.21	4598.49	-1.212	0.136322	No
ENSG00000005486	57414	RHBDD2	rhomboid domain containing 2	3640.8	2008.6	2824.7	1.81261	0.0206714	No	1733.19	2049.85	1891.52	-1.1827	0.294239	No
ENSG00000005513	30812	SOX8	SRY-box 8	680.74	924.625	802.683	-1.35826	0.244333	No	595.927	1137.88	866.904	-1.90943	0.020192	No
ENSG00000005700	25998	IBTK	inhibitor of Bruton tyrosine kinase	1013.82	1220.07	1116.95	-1.20344	0.458533	No	2067.2	2178.55	2122.87	-1.05386	0.628435	No
ENSG00000005801	7748	ZNF195	zinc finger protein 195	305.505	671.911	488.708	-2.19934	0.00171989	Yes	1075.34	1598.31	1336.82	-1.48633	0.0106848	No
ENSG00000005810	23077	MYCBP2	MYC binding protein 2	3592.73	2725.89	3159.31	1.318	0.430553	No	6129.52	6406.7	6268.11	-1.04522	0.821268	No
ENSG00000005812	26224	FBXL3	F-box and leucine rich repeat protein 3	1401.87	1035.56	1218.72	1.35373	0.164677	No	1538.31	1142.49	1340.4	1.34646	0.0218561	No
ENSG00000005844	3683	ITGAL	integrin subunit alpha L	26.3635	14.6602	20.5119	1.7983	0.0632121	No	13.0116	11.7107	12.3612	1.11108	0.777103	No
ENSG00000005882	5164	PDK2	pyruvate dehydrogenase kinase 2	4258.09	618.419	2438.26	6.88545	3.06717e-07	Yes	5413.14	684.341	3048.74	7.91	1.63346e-17	Yes
ENSG00000005884	3675	ITGA3	integrin subunit alpha 3	1505.56	768.162	1136.86	1.95995	0.00673948	No	1831.65	1092.76	1462.21	1.67616	0.000504917	No
ENSG00000005889	7543	ZFX	zinc finger protein X-linked	704.966	679.306	692.136	1.03777	0.88889	No	712.592	884.848	798.72	-1.24173	0.0941825	No
ENSG00000005893	3920	LAMP2	lysosomal associated membrane protein 2	1970.23	970.807	1470.52	2.02948	0.0143089	Yes	1929.49	1217.38	1573.43	1.58496	0.00135596	No
ENSG00000005955	---	---	---	1369.93	1298.78	1334.36	1.05478	0.809339	No	2563.44	1771.51	2167.48	1.44703	5.1846e-07	No
ENSG00000005961	3674	ITGA2B	integrin subunit alpha 2b	142.963	34.9876	88.9752	4.0861	0.00100018	Yes	389.209	131.253	260.231	2.96533	2.78404e-06	Yes
ENSG00000005981	51666	ASB4	ankyrin repeat and SOCS box containing 4	5.02445	1.0118	3.01812	4.96587	0.02496	Yes	11.6514	4.68991	8.17066	2.48436	0.0162852	Yes
ENSG00000006007	51573	GDE1	glycerophosphodiester phosphodiesterase 1	1709.55	1160.07	1434.81	1.47365	0.0215373	No	1724.64	1365.95	1545.29	1.26259	0.0187519	No
ENSG00000006015	55049	REX1BD	required for excision 1-B domain containing	2102.78	936.997	1519.89	2.24417	0.0179814	Yes	1448.29	606.75	1027.52	2.38697	0.000258818	Yes
ENSG00000006016	9244	CRLF1	cytokine receptor like factor 1	66.7907	147.636	107.213	-2.21043	0.0122362	Yes	50.1865	195.853	123.02	-3.90251	0.000138433	Yes
ENSG00000006025	114881	OSBPL7	oxysterol binding protein like 7	394.002	153.21	273.606	2.57164	0.00325829	Yes	1092.73	523.408	808.068	2.08772	0.00015127	Yes
ENSG00000006042	26022	TMEM98	transmembrane protein 98	593.058	1516.82	1054.94	-2.55762	0.00451157	Yes	369.693	783.679	576.686	-2.11981	0.000293329	Yes
ENSG00000006047	51087	YBX2	Y-box binding protein 2	5.95639	81.3602	43.6583	-13.6593	3.20739e-07	Yes	23.2168	143.776	83.4962	-6.19274	2.00254e-07	Yes
ENSG00000006062	9020	MAP3K14	mitogen-activated protein kinase kinase kinase 14	451.044	229.978	340.511	1.96125	0.00769019	No	629.746	350.424	490.085	1.7971	4.07565e-06	No
ENSG00000006071	6833	ABCC8	ATP binding cassette subfamily C member 8	2144.63	349.821	1247.22	6.13064	7.61742e-07	Yes	6139.13	1057.34	3598.24	5.80617	3.9439e-15	Yes
ENSG00000006075	---	---	---	0.70643	10.2613	5.48385	-14.5255	7.04306e-05	Yes	16.3463	20.4316	18.3889	-1.24992	0.66374	No
ENSG00000006114	---	---	---	1066.79	1749.92	1408.35	-1.64036	0.0249967	No	1092.68	2196.5	1644.59	-2.01019	6.88398e-08	Yes
ENSG00000006116	10368	CACNG3	calcium voltage-gated channel auxiliary subunit gamma 3	132.64	323.325	227.983	-2.43761	0.000757883	Yes	119.265	442.216	280.741	-3.70784	6.52569e-08	Yes
ENSG00000006118	54972	TMEM132A	transmembrane protein 132A	5140.23	4069.11	4604.67	1.26323	0.336111	No	2839.1	4938.61	3888.86	-1.7395	0.0179711	No
ENSG00000006125	163	AP2B1	adaptor related protein complex 2 subunit beta 1	9931.02	18692.1	14311.5	-1.88219	0.00529753	No	9395.7	17377.9	13386.8	-1.84956	1.97674e-05	No
ENSG00000006128	6863	TAC1	tachykinin precursor 1	46.3585	685.092	365.725	-14.7781	7.66491e-06	Yes	40.0901	1456.6	748.344	-36.3331	2.3462e-16	Yes
ENSG00000006194	10127	ZNF263	zinc finger protein 263	793.466	831.149	812.307	-1.04749	0.768114	No	1278.19	1055.16	1166.67	1.21136	0.0107856	No
ENSG00000006210	6376	CX3CL1	C-X3-C motif chemokine ligand 1	1104.24	689.088	896.663	1.60246	0.0686975	No	634.116	826.159	730.138	-1.30285	0.19904	No
ENSG00000006282	64847	SPATA20	spermatogenesis associated 20	2382.91	604.441	1493.68	3.94234	3.03585e-06	Yes	3316.02	805.772	2060.9	4.11534	5.75671e-11	Yes
ENSG00000006283	8913	CACNA1G	calcium voltage-gated channel subunit alpha1 G	5841.44	1710.67	3776.05	3.41472	0.00179421	Yes	2939.73	2136.48	2538.11	1.37596	0.20819	No
ENSG00000006327	51330	TNFRSF12A	TNF receptor superfamily member 12A	49.6348	23.7153	36.6751	2.09295	0.202122	No	39.9531	19.3201	29.6366	2.06796	0.0565943	No
ENSG00000006377	1750	DLX6	distal-less homeobox 6	0.997642	1.26389	1.13077	-1.26688	0.744824	No	1.22043	2.45561	1.83802	-2.01208	0.351157	No
ENSG00000006432	4293	MAP3K9	mitogen-activated protein kinase kinase kinase 9	2344.78	1598.47	1971.62	1.46689	0.127119	No	2905.01	2543.23	2724.12	1.14225	0.303793	No
ENSG00000006451	5898	RALA	RAS like proto-oncogene A	1000.18	2640.47	1820.33	-2.64	8.02976e-05	Yes	1059.76	2963.78	2011.77	-2.79666	6.89147e-12	Yes
ENSG00000006453	55971	BAIAP2L1	BAI1 associated protein 2 like 1	19.9285	27.7999	23.8642	-1.39498	0.44721	No	18.2475	46.2123	32.2299	-2.53252	0.0013628	Yes
ENSG00000006459	80853	KDM7A	lysine demethylase 7A	798.376	678.968	738.672	1.17587	0.561135	No	1218.27	1031.62	1124.95	1.18092	0.32159	No
ENSG00000006468	2115	ETV1	ETS variant 1	12011.9	852.641	6432.29	14.0879	1.85252e-09	Yes	14255.3	1317.54	7786.42	10.8196	6.77037e-13	Yes
ENSG00000006530	55750	AGK	acylglycerol kinase	812.513	616.876	714.694	1.31714	0.139139	No	1221.29	1116.5	1168.89	1.09386	0.257969	No
ENSG00000006534	221	ALDH3B1	aldehyde dehydrogenase 3 family member B1	26.9864	27.6812	27.3338	-1.02575	0.973952	No	28.4362	18.6978	23.567	1.52083	0.220912	No
ENSG00000006555	55001	TTC22	tetratricopeptide repeat domain 22	0.600884	5.24671	2.9238	-8.73165	0.0122713	Yes	1.26032	14.4129	7.83661	-11.4359	2.31126e-06	Yes
ENSG00000006576	57157	PHTF2	putative homeodomain transcription factor 2	327.769	586.612	457.19	-1.78971	0.0250845	No	787.953	1192.5	990.227	-1.51342	0.00032319	No
ENSG00000006606	10344	CCL26	C-C motif chemokine ligand 26	1.41793	0.54845	0.983189	2.58534	0.0805709	No	1.69708	0.593448	1.14527	2.8597	0.000967803	Yes
ENSG00000006607	9855	FARP2	FERM, ARH/RhoGEF and pleckstrin domain protein 2	869.776	600.574	735.175	1.44824	0.0746827	No	2028.38	853.631	1441	2.37617	2.42043e-11	Yes
ENSG00000006611	10083	USH1C	USH1 protein network component harmonin	53.9317	7.55238	30.7421	7.14102	0.0106331	Yes	65.9414	11.1406	38.541	5.919	1.11032e-06	Yes
ENSG00000006625	79017	GGCT	gamma-glutamylcyclotransferase	326.623	344.198	335.411	-1.05381	0.829488	No	747.64	463.609	605.624	1.61265	6.77612e-05	No
ENSG00000006634	10926	DBF4	DBF4 zinc finger	38.1942	163.841	101.018	-4.28969	1.87595e-05	Yes	150.753	307.401	229.077	-2.0391	0.00138642	Yes
ENSG00000006638	6915	TBXA2R	thromboxane A2 receptor	12.7984	21.7475	17.273	-1.69924	0.317112	No	6.01462	14.8496	10.4321	-2.46892	0.00401187	Yes
ENSG00000006652	3475	IFRD1	interferon related developmental regulator 1	686.468	908.054	797.261	-1.32279	0.250341	No	1250.19	1345.25	1297.72	-1.07604	0.472056	No
ENSG00000006659	56891	LGALS14	galectin 14	0.516392	0.549181	0.532787	-1.0635	0.885373	No	0.526431	1.79674	1.16159	-3.41306	0.0026746	Yes
ENSG00000006695	1352	COX10	cytochrome c oxidase assembly factor heme A:farnesyltransferase COX10	269.555	374.242	321.899	-1.38837	0.116077	No	296.161	390.828	343.495	-1.31964	0.00164627	No
ENSG00000006704	9569	GTF2IRD1	GTF2I repeat domain containing 1	297.442	1056.95	677.197	-3.55347	3.13467e-06	Yes	368.646	1237.99	803.319	-3.35822	1.10406e-09	Yes
ENSG00000006712	54623	PAF1	PAF1 homolog, Paf1/RNA polymerase II complex component	1482.55	1623.36	1552.96	-1.09498	0.687666	No	2165.57	1597.26	1881.41	1.3558	0.00727228	No
ENSG00000006715	27072	VPS41	VPS41 subunit of HOPS complex	1363.77	1690.32	1527.04	-1.23945	0.21642	No	1340.05	2573.61	1956.83	-1.92054	9.08582e-08	No
ENSG00000006740	9912	ARHGAP44	Rho GTPase activating protein 44	2959.59	384.985	1672.29	7.68755	1.46173e-08	Yes	2861.77	641.297	1751.53	4.46247	5.02525e-12	Yes
ENSG00000006744	60528	ELAC2	elaC ribonuclease Z 2	1269.69	1048.4	1159.05	1.21108	0.354337	No	1389.18	1091.15	1240.16	1.27314	0.014078	No
ENSG00000006747	85477	SCIN	scinderin	20.8639	38.7363	29.8001	-1.85662	0.105207	No	29.7867	32.3138	31.0503	-1.08484	0.856986	No
ENSG00000006756	414	ARSD	arylsulfatase D	163.789	452.017	307.903	-2.75975	0.00148448	Yes	210.844	563.18	387.012	-2.67108	9.42527e-08	Yes
ENSG00000006757	8228	PNPLA4	patatin like phospholipase domain containing 4	337.219	291.344	314.282	1.15746	0.499556	No	329.645	281.455	305.55	1.17122	0.194295	No
ENSG00000006788	8735	MYH13	myosin heavy chain 13	0.889998	0.457274	0.673636	1.94631	0.101064	No	0.857049	0.593344	0.725197	1.44444	0.0918283	No
ENSG00000006831	79602	ADIPOR2	adiponectin receptor 2	1261.46	1359.06	1310.26	-1.07738	0.678013	No	1802.97	1639.27	1721.12	1.09986	0.171484	No
ENSG00000006837	51265	CDKL3	cyclin dependent kinase like 3	10.6238	14.1971	12.4105	-1.33634	0.479969	No	39.6981	46.0023	42.8502	-1.1588	0.311539	No
ENSG00000007001	151531	UPP2	uridine phosphorylase 2	37.9376	18.3569	28.1472	2.06667	0.0279835	Yes	49.4307	24.6564	37.0436	2.00478	0.00430293	Yes
ENSG00000007047	57787	MARK4	microtubule affinity regulating kinase 4	1362.09	2479.09	1920.59	-1.82006	0.00418554	No	1272.37	2158.83	1715.6	-1.69669	1.38281e-05	No
ENSG00000007062	8842	PROM1	prominin 1	109.36	461.419	285.389	-4.21928	0.000149062	Yes	82.9587	598.25	340.604	-7.21142	5.498e-13	Yes
ENSG00000007080	115098	CCDC124	coiled-coil domain containing 124	1236.67	1562.54	1399.61	-1.26351	0.2752	No	1010.49	913.128	961.809	1.10662	0.697336	No
ENSG00000007129	90273	CEACAM21	carcinoembryonic antigen related cell adhesion molecule 21	22.8483	21.2361	22.0422	1.07592	0.905985	No	18.7594	51.4721	35.1158	-2.74381	0.0241896	Yes
ENSG00000007168	5048	PAFAH1B1	platelet activating factor acetylhydrolase 1b regulatory subunit 1	8170.39	8844.26	8507.33	-1.08248	0.785077	No	11192.3	13317.7	12255	-1.1899	0.0816018	No
ENSG00000007171	4843	NOS2	nitric oxide synthase 2	31.7635	34.4307	33.0971	-1.08397	0.858787	No	54.4869	44.1688	49.3279	1.23361	0.216452	No
ENSG00000007174	1770	DNAH9	dynein axonemal heavy chain 9	71.0595	185.839	128.449	-2.61526	0.0698259	No	48.1715	312.919	180.545	-6.49593	1.78177e-07	Yes
ENSG00000007202	9703	KIAA0100	KIAA0100	2589.63	2843.88	2716.76	-1.09818	0.709547	No	4398.19	4879.2	4638.69	-1.10937	0.253439	No
ENSG00000007237	8522	GAS7	growth arrest specific 7	22551.5	1659.98	12105.8	13.5854	2.99869e-09	Yes	19986.1	1982.95	10984.5	10.079	3.08016e-11	Yes
ENSG00000007255	79090	TRAPPC6A	trafficking protein particle complex 6A	225.012	165.065	195.039	1.36317	0.422281	No	194.845	90.05	142.447	2.16374	0.00234708	Yes
ENSG00000007264	4145	MATK	megakaryocyte-associated tyrosine kinase	199.884	495.654	347.769	-2.47971	0.00241639	Yes	98.5396	326.385	212.462	-3.31223	0.000481889	Yes
ENSG00000007312	974	CD79B	CD79b molecule	9.31783	1.44759	5.38271	6.43681	0.00638137	Yes	8.42202	3.50592	5.96397	2.40223	0.03499	Yes
ENSG00000007314	6329	SCN4A	sodium voltage-gated channel alpha subunit 4	52.1528	5.82158	28.9872	8.95852	2.18903e-05	Yes	26.943	12.5937	19.7683	2.13941	0.0153837	Yes
ENSG00000007341	54879	ST7L	suppression of tumorigenicity 7 like	151.114	161.045	156.08	-1.06572	0.757619	No	484.007	408.837	446.422	1.18386	0.058787	No
ENSG00000007350	8277	TKTL1	transketolase like 1	1.84888	389.757	195.803	-210.807	3.38452e-08	Yes	3.49079	241.989	122.74	-69.322	1.3823e-08	Yes
ENSG00000007372	5080	PAX6	paired box 6	4166.15	4033.26	4099.7	1.03295	0.892589	No	6483.11	2448.45	4465.78	2.64785	0.00158257	Yes
ENSG00000007376	113000	RPUSD1	RNA pseudouridine synthase domain containing 1	688.976	418.482	553.729	1.64637	0.0546815	No	368.238	318.726	343.482	1.15534	0.578798	No
ENSG00000007384	64285	RHBDF1	rhomboid 5 homolog 1	144.293	107.247	125.77	1.34542	0.402073	No	315.758	202.983	259.371	1.55558	0.0198177	No
ENSG00000007392	55692	LUC7L	LUC7 like	1095.71	1399.99	1247.85	-1.27771	0.254563	No	3478.48	4106.63	3792.56	-1.18058	0.369607	No
ENSG00000007402	9254	CACNA2D2	calcium voltage-gated channel auxiliary subunit alpha2delta 2	2475.46	1310.45	1892.95	1.88901	0.0177426	No	2615.53	3024.92	2820.22	-1.15652	0.273303	No
ENSG00000007516	8938	BAIAP3	BAI1 associated protein 3	38.4668	715.429	376.948	-18.5986	1.82871e-05	Yes	36.3056	2047.16	1041.73	-56.3869	1.18922e-14	Yes
ENSG00000007520	115939	TSR3	TSR3 ribosome maturation factor	957.325	1045.96	1001.64	-1.09258	0.602967	No	746.937	674.369	710.653	1.10761	0.62724	No
ENSG00000007541	9091	PIGQ	phosphatidylinositol glycan anchor biosynthesis class Q	1499.44	1096.29	1297.87	1.36774	0.170605	No	1362.79	1472.5	1417.64	-1.0805	0.757907	No
ENSG00000007545	57585	CRAMP1	cramped chromatin regulator homolog 1	707.932	355.279	531.605	1.99261	0.00381821	No	1412.9	717.592	1065.25	1.96895	7.5511e-08	No
ENSG00000007866	7005	TEAD3	TEA domain transcription factor 3	27.9685	85.1515	56.56	-3.04455	0.0124067	Yes	44.0397	134.619	89.3294	-3.05677	0.000465554	Yes
ENSG00000007908	6401	SELE	selectin E	4.89352	3.2384	4.06596	1.51109	0.674979	No	9.84209	11.2317	10.5369	-1.14119	0.860608	No
ENSG00000007923	55735	DNAJC11	DnaJ heat shock protein family (Hsp40) member C11	798.154	752.303	775.229	1.06095	0.802839	No	1653.52	1484.98	1569.25	1.1135	0.220102	No
ENSG00000007933	2328	FMO3	flavin containing monooxygenase 3	18.2516	0.831892	9.54173	21.9398	8.34651e-06	Yes	19.2455	1.17934	10.2124	16.3189	5.07026e-08	Yes
ENSG00000007944	29116	MYLIP	myosin regulatory light chain interacting protein	292.659	173.777	233.218	1.6841	0.00979613	No	329.083	250.835	289.959	1.31195	0.0568067	No
ENSG00000007968	1870	E2F2	E2F transcription factor 2	0.96142	166.152	83.5566	-172.819	3.03405e-08	Yes	1.92443	164.821	83.3726	-85.6468	9.28065e-11	Yes
ENSG00000008018	5689	PSMB1	proteasome subunit beta 1	1726.61	1869.76	1798.19	-1.08291	0.758457	No	1725.31	1514.48	1619.89	1.13921	0.229488	No
ENSG00000008056	6853	SYN1	synapsin I	9841.96	2079.49	5960.72	4.73287	2.84763e-06	Yes	5963.34	2559.15	4261.24	2.3302	0.000145581	Yes
ENSG00000008083	3720	JARID2	jumonji and AT-rich interaction domain containing 2	1327.82	1558.96	1443.39	-1.17408	0.551057	No	2650.08	2009.14	2329.61	1.31901	0.00827538	No
ENSG00000008086	6792	CDKL5	cyclin dependent kinase like 5	117.142	127.671	122.407	-1.08989	0.860569	No	91.5786	168.283	129.931	-1.83758	0.167761	No
ENSG00000008118	57172	CAMK1G	calcium/calmodulin dependent protein kinase IG	135.805	98.0947	116.95	1.38443	0.453738	No	163.816	220.229	192.022	-1.34436	0.125222	No
ENSG00000008128	728642	CDK11A	cyclin dependent kinase 11A	37.1034	25.2792	31.1913	1.46774	0.350617	No	58.6876	57.9373	58.3125	1.01295	0.9756	No
ENSG00000008130	65220	NADK	NAD kinase	773.807	897.7	835.754	-1.16011	0.387867	No	831.532	835.052	833.292	-1.00423	0.969746	No
ENSG00000008196	7021	TFAP2B	transcription factor AP-2 beta	548.098	1355.65	951.874	-2.47337	0.000260683	Yes	573.215	1546.72	1059.97	-2.69832	0.0213017	Yes
ENSG00000008197	83741	TFAP2D	transcription factor AP-2 delta	0.603896	1.28784	0.94587	-2.13256	0.180515	No	0.494261	2.00036	1.24731	-4.04718	0.0757418	No
ENSG00000008226	9940	DLEC1	DLEC1 cilia and flagella associated protein	7.27681	35.5993	21.4381	-4.89216	0.0120808	Yes	16.3506	126.977	71.6639	-7.7659	2.31753e-07	Yes
ENSG00000008256	9265	CYTH3	cytohesin 3	1865.83	1061.04	1463.44	1.75849	0.00115567	No	1687.75	1206.6	1447.17	1.39877	6.70958e-05	No
ENSG00000008277	53616	ADAM22	ADAM metallopeptidase domain 22	7476.04	1958.14	4717.09	3.81792	0.000102154	Yes	11495.8	3055.32	7275.55	3.76255	3.33624e-09	Yes
ENSG00000008282	6856	SYPL1	synaptophysin like 1	533.316	410.032	471.674	1.30067	0.283565	No	673.587	489.34	581.464	1.37652	0.00572882	No
ENSG00000008283	1534	CYB561	cytochrome b561	470.532	781.934	626.233	-1.66181	0.0739263	No	346.326	804.054	575.19	-2.32167	1.62872e-05	Yes
ENSG00000008294	9043	SPAG9	sperm associated antigen 9	4531.99	5033.52	4782.76	-1.11066	0.616285	No	5871.24	8032.36	6951.8	-1.36809	0.00199356	No
ENSG00000008300	1951	CELSR3	cadherin EGF LAG seven-pass G-type receptor 3	2996.99	3494.2	3245.6	-1.16591	0.587343	No	4623.08	5265.32	4944.2	-1.13892	0.325301	No
ENSG00000008311	10157	AASS	aminoadipate-semialdehyde synthase	36.9606	148.345	92.6526	-4.01358	0.0012449	Yes	170.53	577.724	374.127	-3.38782	3.57285e-06	Yes
ENSG00000008323	55200	PLEKHG6	pleckstrin homology and RhoGEF domain containing G6	0.761164	1.89859	1.32988	-2.49433	0.0756641	No	0.710904	2.0211	1.366	-2.843	0.00807446	Yes
ENSG00000008324	51188	SS18L2	SS18 like 2	320.034	322.858	321.446	-1.00883	0.979933	No	480.347	390.259	435.303	1.23084	0.106715	No
ENSG00000008382	84954	MPND	MPN domain containing	298.664	487.889	393.277	-1.63357	0.0221158	No	371.849	581.915	476.882	-1.56492	0.00668738	No
ENSG00000008394	4257	MGST1	microsomal glutathione S-transferase 1	267.294	334.796	301.045	-1.25254	0.635335	No	551.737	350.803	451.27	1.57278	0.085901	No
ENSG00000008405	1407	CRY1	cryptochrome circadian regulator 1	1073.65	957.379	1015.51	1.12144	0.580099	No	1702.66	1053.55	1378.1	1.61612	3.66197e-05	No
ENSG00000008441	4784	NFIX	nuclear factor I X	12649.5	3686.8	8168.18	3.43104	0.00261919	Yes	10175.4	3185.42	6680.44	3.19438	0.00140177	Yes
ENSG00000008513	6482	ST3GAL1	ST3 beta-galactoside alpha-2,3-sialyltransferase 1	474.326	390.525	432.426	1.21458	0.512775	No	534.566	638.231	586.399	-1.19392	0.289488	No
ENSG00000008516	64386	MMP25	matrix metallopeptidase 25	18.787	51.6435	35.2152	-2.7489	0.0029054	Yes	15.6671	66.3831	41.0251	-4.2371	2.50802e-07	Yes
ENSG00000008517	9235	IL32	interleukin 32	70.04	28.3029	49.1715	2.47466	0.0602099	No	70.9571	24.0323	47.4947	2.95257	0.00128514	Yes
ENSG00000008710	5310	PKD1	polycystin 1, transient receptor potential channel interacting	16396	1412.45	8904.23	11.6082	1.28891e-06	Yes	33506.1	6012.28	19759.2	5.57295	1.93458e-09	Yes
ENSG00000008735	23542	MAPK8IP2	mitogen-activated protein kinase 8 interacting protein 2	11533.3	5396.26	8464.8	2.13728	0.000143668	Yes	7944.06	3950.93	5947.5	2.01068	1.75242e-06	Yes
ENSG00000008838	9862	MED24	mediator complex subunit 24	2108.28	3090.91	2599.59	-1.46608	0.105234	No	3097.63	3451.71	3274.67	-1.11431	0.311247	No
ENSG00000008853	23221	RHOBTB2	Rho related BTB domain containing 2	639.317	1593.12	1116.22	-2.4919	0.000121174	Yes	623.771	2500.09	1561.93	-4.00802	3.19548e-16	Yes
ENSG00000008869	54497	HEATR5B	HEAT repeat containing 5B	1134.15	1691.71	1412.93	-1.49161	0.145211	No	1588.17	2202.39	1895.28	-1.38675	0.00918407	No
ENSG00000008952	7095	SEC62	SEC62 homolog, preprotein translocation factor	4461.45	3190.93	3826.19	1.39817	0.242633	No	5694.99	4140.23	4917.61	1.37553	0.00230965	No
ENSG00000008988	6224	RPS20	ribosomal protein S20	2230.76	9341.88	5786.32	-4.18776	3.39797e-06	Yes	5765.67	7150.26	6457.97	-1.24014	0.19329	No
ENSG00000009307	7812	CSDE1	cold shock domain containing E1	9193.48	14095.6	11644.5	-1.53321	0.031832	No	11532.1	14163.5	12847.8	-1.22819	0.0211757	No
ENSG00000009335	9690	UBE3C	ubiquitin protein ligase E3C	2384.66	1664.1	2024.38	1.433	0.0993022	No	2303.73	2011.57	2157.65	1.14524	0.135658	No
ENSG00000009413	5980	REV3L	REV3 like, DNA directed polymerase zeta catalytic subunit	1192.47	1875.53	1534	-1.5728	0.0874324	No	4097.75	4828.98	4463.36	-1.17845	0.483715	No
ENSG00000009694	10178	TENM1	teneurin transmembrane protein 1	3018.15	351.453	1684.8	8.58762	1.56759e-06	Yes	5238.93	1644.35	3441.64	3.18602	5.48713e-06	Yes
ENSG00000009709	5081	PAX7	paired box 7	0.931409	159.28	80.1056	-171.009	1.29814e-08	Yes	0.956591	364.024	182.49	-380.543	1.11161e-14	Yes
ENSG00000009724	10747	MASP2	mannan binding lectin serine peptidase 2	276.674	73.663	175.169	3.75595	2.87148e-05	Yes	3.58453	3.50603	3.54528	1.02239	0.966549	No
ENSG00000009780	199870	FAM76A	family with sequence similarity 76 member A	288.633	184.174	236.404	1.56718	0.0348139	No	514.486	326.224	420.355	1.57709	1.06158e-05	No
ENSG00000009790	80342	TRAF3IP3	TRAF3 interacting protein 3	59.3735	21.9844	40.6789	2.70071	0.00108657	Yes	26.464	6.28063	16.3723	4.2136	5.68826e-06	Yes
ENSG00000009830	29954	POMT2	protein O-mannosyltransferase 2	622.347	616.544	619.445	1.00941	0.972982	No	1204.43	1119.88	1162.15	1.0755	0.497627	No
ENSG00000009844	51534	VTA1	vesicle trafficking 1	1163.15	1964	1563.57	-1.68852	0.0244075	No	1226.47	2319.16	1772.82	-1.89091	1.73009e-06	No
ENSG00000009950	51085	MLXIPL	MLX interacting protein like	776.16	7.69698	391.929	100.84	9.17246e-09	Yes	2711.33	28.2336	1369.78	96.032	1.18779e-21	Yes
ENSG00000009954	9031	BAZ1B	bromodomain adjacent to zinc finger domain 1B	2427.11	3043.09	2735.1	-1.25379	0.288235	No	3212.92	3562.42	3387.67	-1.10878	0.302553	No
ENSG00000010017	10048	RANBP9	RAN binding protein 9	1105.92	1384.36	1245.14	-1.25177	0.16224	No	1611.25	1900.69	1755.97	-1.17964	0.0151994	No
ENSG00000010030	51513	ETV7	ETS variant 7	6.15948	1.50646	3.83297	4.08872	0.0181076	Yes	6.24008	1.43673	3.83841	4.34324	7.29392e-06	Yes
ENSG00000010072	83932	SPRTN	SprT-like N-terminal domain	124.49	169.242	146.866	-1.35949	0.17993	No	154.131	239.528	196.83	-1.55405	0.000264399	No
ENSG00000010165	51603	EEF1AKNMT	eEF1A lysine and N-terminal methyltransferase	985.951	780.854	883.403	1.26266	0.202273	No	803.385	668.597	735.991	1.2016	0.0278611	No
ENSG00000010219	8798	DYRK4	dual specificity tyrosine phosphorylation regulated kinase 4	193.407	94.1101	143.758	2.05511	0.0131862	Yes	396.843	170.399	283.621	2.32891	6.8669e-09	Yes
ENSG00000010244	7756	ZNF207	zinc finger protein 207	2203.44	2654.99	2429.21	-1.20493	0.204763	No	5835.05	4994.86	5414.96	1.16821	0.131432	No
ENSG00000010256	7384	UQCRC1	ubiquinol-cytochrome c reductase core protein 1	6195.38	3852.89	5024.13	1.60799	0.0309375	No	3899.52	2641.76	3270.64	1.47611	0.00348402	No
ENSG00000010270	83930	STARD3NL	STARD3 N-terminal like	746.901	1718.31	1232.61	-2.30058	0.000993389	Yes	928.947	2014.02	1471.48	-2.16807	5.97931e-12	Yes
ENSG00000010278	928	CD9	CD9 molecule	1116.77	445.59	781.18	2.50627	0.0058417	Yes	975.191	340.901	658.046	2.86062	8.62924e-06	Yes
ENSG00000010282	57467	HHATL	hedgehog acyltransferase like	551.685	1.19746	276.441	460.711	4.33366e-09	Yes	696.285	6.01105	351.148	115.834	5.70323e-16	Yes
ENSG00000010292	9918	NCAPD2	non-SMC condensin I complex subunit D2	434.283	1501.11	967.695	-3.45652	0.000100618	Yes	550.592	1291.12	920.858	-2.34498	1.26931e-05	Yes
ENSG00000010295	25900	IFFO1	intermediate filament family orphan 1	1214.98	407.067	811.022	2.98471	9.70021e-06	Yes	1832.79	516.301	1174.54	3.54984	3.41224e-12	Yes
ENSG00000010310	2696	GIPR	gastric inhibitory polypeptide receptor	11.9976	0.756563	6.3771	15.8581	1.7979e-05	Yes	61.6711	38.4989	50.085	1.60189	0.28141	No
ENSG00000010318	51533	PHF7	PHD finger protein 7	99.5848	61.6441	80.6145	1.61548	0.0565123	No	219.876	113.323	166.6	1.94026	1.07819e-06	No
ENSG00000010319	56920	SEMA3G	semaphorin 3G	650.793	142.145	396.469	4.57837	3.26215e-06	Yes	1512.53	211.453	861.993	7.15304	4.116e-10	Yes
ENSG00000010322	11188	NISCH	nischarin	9786.79	4260.7	7023.75	2.29699	0.00155375	Yes	17510.1	5540.15	11525.1	3.16058	2.14589e-10	Yes
ENSG00000010327	23166	STAB1	stabilin 1	210.428	314.234	262.331	-1.49331	0.153249	No	343.267	420.756	382.011	-1.22574	0.273568	No
ENSG00000010361	80199	FUZ	fuzzy planar cell polarity protein	536.546	396.788	466.667	1.35222	0.35499	No	704.235	361.618	532.926	1.94745	8.9135e-05	No
ENSG00000010379	6540	SLC6A13	solute carrier family 6 member 13	142.839	20.9176	81.8782	6.82865	0.00677753	Yes	134.846	100.823	117.834	1.33744	0.571888	No
ENSG00000010404	3423	IDS	iduronate 2-sulfatase	8306.25	4546.55	6426.4	1.82693	0.00992873	No	12520.3	9475.5	10997.9	1.32133	0.108955	No
ENSG00000010438	5646	PRSS3	serine protease 3	1523.36	109.159	816.261	13.9554	5.30991e-09	Yes	892.729	56.0582	474.393	15.925	4.3846e-10	Yes
ENSG00000010539	7752	ZNF200	zinc finger protein 200	165.482	220.462	192.972	-1.33224	0.172288	No	240.908	276.915	258.912	-1.14946	0.231689	No
ENSG00000010610	920	CD4	CD4 molecule	164.795	97.6326	131.214	1.68791	0.0790215	No	141.672	94.7708	118.222	1.49489	0.114909	No
ENSG00000010626	10233	LRRC23	leucine rich repeat containing 23	395.755	213.254	304.505	1.85579	0.0159311	No	644.777	246.187	445.482	2.61905	5.58702e-08	Yes
ENSG00000010671	695	BTK	Bruton tyrosine kinase	13.6447	20.2337	16.9392	-1.4829	0.209106	No	24.6691	33.7569	29.213	-1.36839	0.178503	No
ENSG00000010704	3077	HFE	homeostatic iron regulator	27.9116	20.8371	24.3744	1.33951	0.585258	No	33.3003	24.824	29.0622	1.34146	0.241878	No
ENSG00000010803	22955	SCMH1	Scm polycomb group protein homolog 1	777.099	1589.69	1183.39	-2.04567	0.000397674	Yes	926.443	1764.57	1345.5	-1.90467	9.44656e-10	No
ENSG00000010810	2534	FYN	FYN proto-oncogene, Src family tyrosine kinase	3175.55	7799.8	5487.68	-2.4562	8.78784e-05	Yes	3756.23	7302.64	5529.43	-1.94414	1.01537e-09	No
ENSG00000010818	3097	HIVEP2	human immunodeficiency virus type I enhancer binding protein 2	3430.08	1781.21	2605.64	1.9257	0.0327498	No	4456.72	2349.5	3403.11	1.89688	0.00410015	No
ENSG00000010932	2326	FMO1	flavin containing monooxygenase 1	2.31924	21.816	12.0676	-9.40653	0.00193844	Yes	2.1281	11.6959	6.912	-5.49592	0.000153377	Yes
ENSG00000011007	6924	ELOA	elongin A	798.918	1228.18	1013.55	-1.5373	0.00853099	No	1279	1717.24	1498.12	-1.34264	0.000587204	No
ENSG00000011009	11313	LYPLA2	lysophospholipase 2	597.342	1338.81	968.077	-2.24128	0.00527186	Yes	746.351	1108.7	927.523	-1.48549	0.0154093	No
ENSG00000011021	1185	CLCN6	chloride voltage-gated channel 6	1890.65	1387.1	1638.88	1.36303	0.23309	No	2374.32	2045.72	2210.02	1.16063	0.0303399	No
ENSG00000011028	9902	MRC2	mannose receptor C type 2	186.513	313.34	249.927	-1.67999	0.229108	No	137.731	661.883	399.807	-4.80562	5.74248e-08	Yes
ENSG00000011083	6534	SLC6A7	solute carrier family 6 member 7	1832.95	157.688	995.318	11.6239	2.2504e-09	Yes	5050.19	662.148	2856.17	7.62699	1.70636e-08	Yes
ENSG00000011105	10867	TSPAN9	tetraspanin 9	8096.79	2380.35	5238.57	3.40151	0.000453936	Yes	8376.98	1136.39	4756.69	7.37155	1.00758e-15	Yes
ENSG00000011114	55727	BTBD7	BTB domain containing 7	422.653	833.673	628.163	-1.97248	0.00235696	No	700.742	996.064	848.403	-1.42144	0.00280168	No
ENSG00000011132	9546	APBA3	amyloid beta precursor protein binding family A member 3	365.751	205.002	285.377	1.78413	0.0393871	No	524.821	370.448	447.634	1.41672	0.0894146	No
ENSG00000011143	54903	MKS1	MKS transition zone complex subunit 1	228.717	309.225	268.971	-1.352	0.153605	No	397.882	513.732	455.807	-1.29117	0.0643176	No
ENSG00000011198	51099	ABHD5	abhydrolase domain containing 5	232.117	217.394	224.756	1.06772	0.764276	No	196.272	277.519	236.896	-1.41395	0.023259	No
ENSG00000011201	3730	ANOS1	anosmin 1	208.126	1414.63	811.38	-6.79702	6.8571e-07	Yes	124.693	1660.73	892.711	-13.3186	1.87854e-08	Yes
ENSG00000011243	26993	AKAP8L	A-kinase anchoring protein 8 like	1420.94	1558.7	1489.82	-1.09695	0.722105	No	7161.1	4002.81	5581.96	1.78902	0.000173135	No
ENSG00000011258	54799	MBTD1	mbt domain containing 1	393.312	1134.35	763.829	-2.88409	7.34809e-05	Yes	1297.7	1721.32	1509.51	-1.32644	0.0730175	No
ENSG00000011260	51096	UTP18	UTP18 small subunit processome component	791.975	621.906	706.94	1.27346	0.239997	No	937.31	685.458	811.384	1.36742	0.000442757	No
ENSG00000011275	54476	RNF216	ring finger protein 216	1131.83	1187.76	1159.8	-1.04941	0.816776	No	1206.4	1260.34	1233.37	-1.04471	0.552227	No
ENSG00000011295	54902	TTC19	tetratricopeptide repeat domain 19	1646.56	1661.36	1653.96	-1.00899	0.962513	No	2068.03	1869.3	1968.66	1.10631	0.128215	No
ENSG00000011304	5725	PTBP1	polypyrimidine tract binding protein 1	864.191	2706.47	1785.33	-3.1318	0.000109405	Yes	1758.84	2032.5	1895.67	-1.15559	0.388876	No
ENSG00000011332	8193	DPF1	double PHD fingers 1	420.318	2021.93	1221.12	-4.81046	2.54917e-06	Yes	529.589	2318.3	1423.94	-4.37754	1.98867e-12	Yes
ENSG00000011347	9066	SYT7	synaptotagmin 7	4666.56	2365.58	3516.07	1.97269	0.00596271	No	4911.78	2884.46	3898.12	1.70284	0.00524937	No
ENSG00000011376	23395	LARS2	leucyl-tRNA synthetase 2, mitochondrial	559.295	751.22	655.258	-1.34315	0.141478	No	602.405	762.835	682.62	-1.26632	0.00617752	No
ENSG00000011405	5286	PIK3C2A	phosphatidylinositol-4-phosphate 3-kinase catalytic subunit type 2 alpha	978.239	682.035	830.137	1.43429	0.228155	No	2748.18	1519.95	2134.06	1.80807	8.95527e-05	No
ENSG00000011422	5329	PLAUR	plasminogen activator, urokinase receptor	43.9286	59.6434	51.786	-1.35774	0.396679	No	42.7417	70.3859	56.5638	-1.64677	0.127815	No
ENSG00000011426	54443	ANLN	anillin actin binding protein	878.784	221.116	549.95	3.97431	3.05815e-05	Yes	897.568	349.663	623.616	2.56695	3.98696e-05	Yes
ENSG00000011451	58525	WIZ	WIZ zinc finger	1208.54	3918.89	2563.72	-3.24265	1.71474e-05	Yes	1110.62	3206.55	2158.58	-2.88717	1.03379e-07	Yes
ENSG00000011454	2844	GPR21	G protein-coupled receptor 21	1548.29	2513.19	2030.74	-1.6232	0.0256275	No	2247.44	3258.31	2752.88	-1.44978	1.56594e-05	No
ENSG00000011465	1634	DCN	decorin	1346.02	458.525	902.274	2.93555	0.0165467	Yes	1039.37	560.776	800.072	1.85344	0.124012	No
ENSG00000011478	54814	QPCTL	glutaminyl-peptide cyclotransferase like	361.821	104.438	233.13	3.46445	0.00240399	Yes	231.551	148.791	190.171	1.55622	0.000817995	No
ENSG00000011485	5536	PPP5C	protein phosphatase 5 catalytic subunit	2365.23	2004.92	2185.08	1.17971	0.390131	No	2561.51	2556.88	2559.2	1.00181	0.985685	No
ENSG00000011523	23177	CEP68	centrosomal protein 68	1753.99	1524.2	1639.1	1.15076	0.478332	No	2163.16	1796.71	1979.94	1.20396	0.0219143	No
ENSG00000011566	8491	MAP4K3	mitogen-activated protein kinase kinase kinase kinase 3	935.393	986.015	960.704	-1.05412	0.821132	No	1871.16	1744.79	1807.97	1.07242	0.604567	No
ENSG00000011590	27033	ZBTB32	zinc finger and BTB domain containing 32	19.6243	6.12607	12.8752	3.20341	0.00576142	Yes	3.23702	0.710646	1.97383	4.55504	2.62288e-06	Yes
ENSG00000011600	7305	TYROBP	TYRO protein tyrosine kinase binding protein	124.469	93.1637	108.817	1.33603	0.393295	No	132.879	38.166	85.5227	3.48162	3.14631e-06	Yes
ENSG00000011638	57146	TMEM159	transmembrane protein 159	1139.59	213.053	676.32	5.34884	1.69993e-07	Yes	771.565	303.162	537.363	2.54506	8.18465e-07	Yes
ENSG00000011677	2556	GABRA3	gamma-aminobutyric acid type A receptor alpha3 subunit	302.675	1731.24	1016.96	-5.7198	1.85456e-07	Yes	166.679	2540.8	1353.74	-15.2437	3.69249e-14	Yes
ENSG00000012048	672	BRCA1	BRCA1 DNA repair associated	45.2185	243.496	144.357	-5.38488	3.2323e-06	Yes	75.6183	304.108	189.863	-4.02162	1.73137e-07	Yes
ENSG00000012061	2067	ERCC1	ERCC excision repair 1, endonuclease non-catalytic subunit	876.237	827.584	851.911	1.05879	0.830476	No	2190.43	1460.91	1825.67	1.49936	0.00162127	No
ENSG00000012124	933	CD22	CD22 molecule	70.9503	1.88952	36.4199	37.5495	4.28291e-06	Yes	262.556	7.00071	134.778	37.5042	8.54069e-11	Yes
ENSG00000012171	7869	SEMA3B	semaphorin 3B	921.657	156.144	538.9	5.90261	0.000416161	Yes	961.47	291.354	626.412	3.30001	1.61945e-06	Yes
ENSG00000012174	51360	MBTPS2	membrane bound transcription factor peptidase, site 2	854.781	784.528	819.655	1.08955	0.757289	No	732.871	1067.85	900.36	-1.45708	0.0215404	No
ENSG00000012211	4007	PRICKLE3	prickle planar cell polarity protein 3	18.8744	13.0977	15.986	1.44105	0.385572	No	36.1866	17.0673	26.627	2.12023	2.71515e-05	Yes
ENSG00000012223	4057	LTF	lactotransferrin	18.9045	5.08824	11.9964	3.71534	0.0230579	Yes	16.7926	3.14324	9.96794	5.34246	0.000186917	Yes
ENSG00000012232	2137	EXTL3	exostosin like glycosyltransferase 3	2705.34	3021.15	2863.25	-1.11674	0.58731	No	1681.78	2908.52	2295.15	-1.72943	1.41577e-08	No
ENSG00000012504	9971	NR1H4	nuclear receptor subfamily 1 group H member 4	0.706334	1.17418	0.940259	-1.66237	0.479406	No	1.09792	4.31279	2.70535	-3.92816	0.00402078	Yes
ENSG00000012660	60481	ELOVL5	ELOVL fatty acid elongase 5	1674.28	1651.14	1662.71	1.01401	0.945508	No	1992.74	2165.34	2079.04	-1.08661	0.378101	No
ENSG00000012779	240	ALOX5	arachidonate 5-lipoxygenase	871.847	30.0004	450.924	29.0611	2.58735e-07	Yes	1159.35	36.2037	597.777	32.023	2.25302e-17	Yes
ENSG00000012817	8284	KDM5D	lysine demethylase 5D	17.7077	6.21641	11.962	2.84853	0.668006	No	1441.05	78.6812	759.863	18.315	0.0176641	Yes
ENSG00000012822	57658	CALCOCO1	calcium binding and coiled-coil domain 1	3987.54	1217.29	2602.42	3.27575	3.35099e-05	Yes	9257.65	2585.82	5921.73	3.58016	2.1418e-13	Yes
ENSG00000012963	55148	UBR7	ubiquitin protein ligase E3 component n-recognin 7 (putative)	1133.39	1413.88	1273.63	-1.24748	0.177774	No	1253.43	1391.67	1322.55	-1.11029	0.166911	No
ENSG00000012983	11183	MAP4K5	mitogen-activated protein kinase kinase kinase kinase 5	456.561	724.398	590.479	-1.58664	0.0599546	No	2034.35	1867.17	1950.76	1.08954	0.466764	No
ENSG00000013016	30845	EHD3	EH domain containing 3	3258.93	686.571	1972.75	4.74668	9.54361e-06	Yes	2409.84	714.982	1562.41	3.37049	4.24205e-08	Yes
ENSG00000013275	5704	PSMC4	proteasome 26S subunit, ATPase 4	2221.74	1577.59	1899.67	1.40831	0.0387638	No	1841.6	1455.63	1648.62	1.26515	0.0210379	No
ENSG00000013288	23324	MAN2B2	mannosidase alpha class 2B member 2	362.744	669.905	516.324	-1.84677	0.0401607	No	281.276	595.822	438.549	-2.11828	1.32308e-05	Yes
ENSG00000013293	57709	SLC7A14	solute carrier family 7 member 14	1481	305.794	893.395	4.84311	3.66911e-05	Yes	2173.49	926.498	1549.99	2.34592	0.00103562	Yes
ENSG00000013297	5010	CLDN11	claudin 11	1068.13	98.9247	583.527	10.7974	0.00249995	Yes	1175.8	221.096	698.447	5.31804	8.10348e-06	Yes
ENSG00000013306	51629	SLC25A39	solute carrier family 25 member 39	1212.85	1502.96	1357.9	-1.2392	0.400041	No	1805.43	1651.48	1728.46	1.09322	0.674301	No
ENSG00000013364	9961	MVP	major vault protein	706.81	120.524	413.667	5.86449	3.33737e-05	Yes	744.359	131.919	438.139	5.64254	6.8008e-13	Yes
ENSG00000013374	51667	NUB1	negative regulator of ubiquitin like proteins 1	962.995	778.079	870.537	1.23766	0.13061	No	1768.14	1128.75	1448.44	1.56646	2.18879e-06	No
ENSG00000013375	5238	PGM3	phosphoglucomutase 3	328.323	552.742	440.533	-1.68353	0.00995538	No	884.233	962.545	923.389	-1.08856	0.329792	No
ENSG00000013392	112611	RWDD2A	RWD domain containing 2A	452.663	351.114	401.889	1.28922	0.243417	No	627.369	482.521	554.945	1.30019	0.00921218	No
ENSG00000013441	1195	CLK1	CDC like kinase 1	915.653	1115.69	1015.67	-1.21846	0.617283	No	7305.14	5112.3	6208.72	1.42894	0.00654706	No
ENSG00000013503	55703	POLR3B	RNA polymerase III subunit B	287.891	613.382	450.636	-2.13061	0.00153719	Yes	308.128	660.772	484.45	-2.14447	2.95552e-07	Yes
ENSG00000013523	23357	ANGEL1	angel homolog 1	860.073	325.233	592.653	2.64448	8.5186e-05	Yes	954.997	870.931	912.964	1.09652	0.330124	No
ENSG00000013561	9604	RNF14	ring finger protein 14	1458.02	1051.53	1254.78	1.38656	0.139339	No	1712.64	1297.76	1505.2	1.31969	0.00529897	No
ENSG00000013563	1774	DNASE1L1	deoxyribonuclease 1 like 1	102.291	87.9724	95.1316	1.16276	0.725215	No	332.207	213.504	272.855	1.55597	0.000447073	No
ENSG00000013573	1663	DDX11	DEAD/H-box helicase 11	139.516	263.221	201.369	-1.88667	0.202672	No	589.896	817.918	703.907	-1.38655	0.268539	No
ENSG00000013583	50865	HEBP1	heme binding protein 1	516.341	223.406	369.874	2.31122	0.00160636	Yes	556.637	251.321	403.979	2.21484	3.03474e-07	Yes
ENSG00000013588	9052	GPRC5A	G protein-coupled receptor class C group 5 member A	3.62729	3.54385	3.58557	1.02354	0.980148	No	5.38459	10.2741	7.82936	-1.90806	0.243948	No
ENSG00000013619	10046	MAMLD1	mastermind like domain containing 1	486.639	516.079	501.359	-1.0605	0.86655	No	536.632	900.191	718.412	-1.67748	0.000302463	No
ENSG00000013725	923	CD6	CD6 molecule	15.9387	10.8844	13.4115	1.46436	0.483339	No	10.5963	42.7757	26.686	-4.03686	9.25917e-05	Yes
ENSG00000013810	10460	TACC3	transforming acidic coiled-coil containing protein 3	115.065	598.064	356.564	-5.19763	3.45151e-06	Yes	187.003	521.392	354.198	-2.78816	0.00109253	Yes
ENSG00000014123	23376	UFL1	UFM1 specific ligase 1	437.002	324.755	380.878	1.34564	0.152045	No	775.677	589.571	682.624	1.31566	0.0236547	No
ENSG00000014138	23649	POLA2	DNA polymerase alpha 2, accessory subunit	326.718	307.915	317.316	1.06107	0.830032	No	388.375	328.634	358.504	1.18179	0.284196	No
ENSG00000014164	23144	ZC3H3	zinc finger CCCH-type containing 3	568.091	768.793	668.442	-1.35329	0.237094	No	474.458	553.221	513.84	-1.16601	0.424146	No
ENSG00000014216	823	CAPN1	calpain 1	3680.95	3103.37	3392.16	1.18612	0.365827	No	2544.13	2498.78	2521.46	1.01815	0.900404	No
ENSG00000014257	55	ACPP	acid phosphatase, prostate	0.7608	1.75954	1.26017	-2.31275	0.133761	No	1.68093	1.58155	1.63124	1.06284	0.898724	No
ENSG00000014641	4190	MDH1	malate dehydrogenase 1	8571.93	3045.71	5808.82	2.81443	3.02174e-05	Yes	8413.24	3990.9	6202.07	2.10811	2.06618e-08	Yes
ENSG00000014824	10463	SLC30A9	solute carrier family 30 member 9	2274.74	2738.73	2506.74	-1.20398	0.399594	No	3179.95	3449.46	3314.7	-1.08475	0.362055	No
ENSG00000014914	10903	MTMR11	myotubularin related protein 11	116.263	133.854	125.059	-1.15131	0.664742	No	310.761	234.27	272.516	1.32651	0.159757	No
ENSG00000014919	1355	COX15	cytochrome c oxidase assembly homolog COX15	407.2	488.661	447.93	-1.20005	0.302817	No	380.114	648.493	514.304	-1.70605	3.57797e-06	No
ENSG00000015133	440193	CCDC88C	coiled-coil domain containing 88C	116.538	1423.28	769.909	-12.213	5.62407e-09	Yes	102.231	1247.1	674.668	-12.1989	1.28262e-16	Yes
ENSG00000015153	10138	YAF2	YY1 associated factor 2	552.82	528.875	540.847	1.04527	0.88073	No	663.447	772.769	718.108	-1.16478	0.143088	No
ENSG00000015171	10771	ZMYND11	zinc finger MYND-type containing 11	3905.34	3293.33	3599.33	1.18583	0.423966	No	5608.2	4857.05	5232.63	1.15465	0.210292	No
ENSG00000015285	7454	WAS	WASP actin nucleation promoting factor	40.5232	34.6794	37.6013	1.16851	0.627925	No	98.9864	46.6776	72.832	2.12064	1.07497e-06	Yes
ENSG00000015413	1800	DPEP1	dipeptidase 1	1.47765	59.2547	30.3662	-40.1007	1.49871e-07	Yes	2.41592	70.9087	36.6623	-29.3506	2.49981e-09	Yes
ENSG00000015475	637	BID	BH3 interacting domain death agonist	1071.89	1089.86	1080.87	-1.01677	0.94499	No	642.675	676.163	659.419	-1.05211	0.701104	No
ENSG00000015479	9782	MATR3	matrin 3	13269.8	21555.8	17412.8	-1.62443	0.0451048	No	16093.6	23637.8	19865.7	-1.46877	0.000288255	No
ENSG00000015520	29881	NPC1L1	NPC1 like intracellular cholesterol transporter 1	4.94629	1.12711	3.0367	4.38847	0.00933885	Yes	15.4293	3.1217	9.27552	4.9426	1.12362e-05	Yes
ENSG00000015532	64132	XYLT2	xylosyltransferase 2	961.614	523.071	742.343	1.8384	0.00722788	No	890.519	413.61	652.064	2.15304	2.0843e-06	Yes
ENSG00000015568	84220	RGPD5	RANBP2 like and GRIP domain containing 5	21.4298	32.0567	26.7432	-1.49589	0.440311	No	15.1734	20.9803	18.0769	-1.38271	0.196611	No
ENSG00000015592	81551	STMN4	stathmin 4	3624.01	7935.71	5779.86	-2.18976	0.00147725	Yes	4259.21	6934.07	5596.64	-1.62802	5.28694e-05	No
ENSG00000015676	23386	NUDCD3	NudC domain containing 3	7776.68	4832.57	6304.63	1.60922	0.0138982	No	4720.7	4219.34	4470.02	1.11882	0.23533	No
ENSG00000016082	3670	ISL1	ISL LIM homeobox 1	0.707031	1.89184	1.29944	-2.67575	0.0667634	No	0.597884	44.9655	22.7817	-75.2077	1.66738e-06	Yes
ENSG00000016391	55349	CHDH	choline dehydrogenase	723.068	293.663	508.366	2.46223	0.00288662	Yes	1062.39	253.938	658.163	4.18366	2.54453e-08	Yes
ENSG00000016402	53832	IL20RA	interleukin 20 receptor subunit alpha	419.803	13.1707	216.487	31.874	3.92146e-06	Yes	342.895	8.05406	175.475	42.5742	9.21282e-15	Yes
ENSG00000016602	22802	CLCA4	chloride channel accessory 4	17.0352	0.551955	8.79358	30.8634	1.10301e-07	Yes	51.3836	0.763859	26.0737	67.2684	2.19361e-17	Yes
ENSG00000016864	55830	GLT8D1	glycosyltransferase 8 domain containing 1	651.41	907.193	779.301	-1.39266	0.0523781	No	1181.04	1253.15	1217.1	-1.06106	0.408909	No
ENSG00000017260	27032	ATP2C1	ATPase secretory pathway Ca2+ transporting 1	2611.4	4046.45	3328.92	-1.54953	0.0353427	No	3235.02	5156.45	4195.74	-1.59394	9.42689e-05	No
ENSG00000017373	---	---	---	6978.59	3941.36	5459.97	1.7706	0.0214513	No	7009.84	3611.77	5310.81	1.94083	3.41469e-06	No
ENSG00000017427	3479	IGF1	insulin like growth factor 1	30.6739	170.602	100.638	-5.56181	0.000209494	Yes	46.4564	168.817	107.637	-3.63387	0.000541679	Yes
ENSG00000017483	92745	SLC38A5	solute carrier family 38 member 5	888.966	604.206	746.586	1.4713	0.127621	No	510.454	558.092	534.273	-1.09332	0.568468	No
ENSG00000017621	---	---	---	466.843	81.0634	273.953	5.75898	6.03618e-06	Yes	459.667	71.0389	265.353	6.47064	3.50902e-14	Yes
ENSG00000017797	10928	RALBP1	ralA binding protein 1	1656	1112	1384	1.48921	0.042739	No	1868.4	1039.67	1454.03	1.79711	3.14335e-08	No
ENSG00000018189	22902	RUFY3	RUN and FYVE domain containing 3	4010.98	9964.49	6987.74	-2.4843	0.00167753	Yes	4439.61	11348	7893.82	-2.55609	3.85356e-10	Yes
ENSG00000018236	1272	CNTN1	contactin 1	12812.1	8613.43	10712.8	1.48745	0.146882	No	10189	7677.19	8933.09	1.32718	0.453279	No
ENSG00000018280	6556	SLC11A1	solute carrier family 11 member 1	17.8397	14.2912	16.0654	1.2483	0.671864	No	54.686	18.55	36.618	2.94803	0.000530047	Yes
ENSG00000018408	25937	WWTR1	WW domain containing transcription regulator 1	228.253	322.114	275.184	-1.41121	0.277272	No	273.882	660.514	467.198	-2.41168	0.000808151	Yes
ENSG00000018510	8540	AGPS	alkylglycerone phosphate synthase	824.719	1265.2	1044.96	-1.5341	0.0818037	No	924.509	1764.03	1344.27	-1.90808	6.6434e-07	No
ENSG00000018607	---	---	---	2.33901	11.9438	7.14139	-5.10635	0.00815117	Yes	6.68845	28.3404	17.5144	-4.23722	9.03326e-06	Yes
ENSG00000018610	63932	CXorf56	chromosome X open reading frame 56	403.236	330.228	366.732	1.22108	0.28872	No	508.994	424.567	466.781	1.19885	0.0639414	No
ENSG00000018625	477	ATP1A2	ATPase Na+/K+ transporting subunit alpha 2	7582.15	5402.25	6492.2	1.40352	0.432359	No	10870.9	5977.68	8424.31	1.81859	0.0369736	No
ENSG00000018699	55622	TTC27	tetratricopeptide repeat domain 27	152.974	362.978	257.976	-2.37281	0.000107947	Yes	219.046	432.193	325.619	-1.97307	1.48196e-07	No
ENSG00000018869	147948	ZNF582	zinc finger protein 582	138.145	92.2413	115.193	1.49765	0.0829071	No	136.618	95.9396	116.279	1.424	0.00597238	No
ENSG00000019102	23584	VSIG2	V-set and immunoglobulin domain containing 2	4.09618	6.91787	5.50702	-1.68886	0.264914	No	19.2687	14.5288	16.8987	1.32625	0.221146	No
ENSG00000019144	23187	PHLDB1	pleckstrin homology like domain family B member 1	2953.22	2480.48	2716.85	1.19058	0.407172	No	6237.14	4701.96	5469.55	1.3265	0.0354058	No
ENSG00000019169	8685	MARCO	macrophage receptor with collagenous structure	33.413	2.47135	17.9422	13.5202	0.000707965	Yes	31.5085	6.42646	18.9675	4.90293	0.00905443	Yes
ENSG00000019186	1591	CYP24A1	cytochrome P450 family 24 subfamily A member 1	19.1547	5.28158	12.2181	3.62669	0.0525027	No	7.8788	8.73579	8.3073	-1.10877	0.81492	No
ENSG00000019485	56981	PRDM11	PR/SET domain 11	215.648	134.169	174.909	1.60729	0.0235007	No	201.226	147.714	174.47	1.36227	0.0392124	No
ENSG00000019505	57586	SYT13	synaptotagmin 13	2875.51	4480.94	3678.23	-1.55831	0.0917077	No	2803.81	7203.82	5003.82	-2.56929	5.24365e-07	Yes
ENSG00000019549	6591	SNAI2	snail family transcriptional repressor 2	85.3974	54.376	69.8867	1.5705	0.205402	No	159.961	71.0865	115.524	2.25024	0.00102401	Yes
ENSG00000019582	972	CD74	CD74 molecule	2147.77	147.945	1147.86	14.5173	3.78924e-05	Yes	2154.78	121.203	1137.99	17.7784	3.7057e-11	Yes
ENSG00000019991	3082	HGF	hepatocyte growth factor	16.7234	12.0508	14.3871	1.38775	0.56384	No	30.2121	16.6299	23.421	1.81673	0.0975522	No
ENSG00000019995	54764	ZRANB1	zinc finger RANBP2-type containing 1	2459.29	1941.92	2200.61	1.26642	0.247018	No	3212.46	2438.87	2825.67	1.31719	0.000677925	No
ENSG00000020129	23154	NCDN	neurochondrin	13510	2950.79	8230.41	4.57845	1.36329e-06	Yes	8374.83	3419.11	5896.97	2.44941	0.000141871	Yes
ENSG00000020181	25960	ADGRA2	adhesion G protein-coupled receptor A2	489.816	254.299	372.058	1.92614	0.135601	No	680.065	384.025	532.045	1.77089	0.0122883	No
ENSG00000020256	55734	ZFP64	ZFP64 zinc finger protein	301.218	775.553	538.385	-2.57472	8.25278e-05	Yes	278.73	695.994	487.362	-2.49702	2.61155e-12	Yes
ENSG00000020426	4331	MNAT1	MNAT1 component of CDK activating kinase	165.511	170.016	167.763	-1.02722	0.919939	No	416.179	266.144	341.162	1.56373	2.09702e-05	No
ENSG00000020577	23034	SAMD4A	sterile alpha motif domain containing 4A	1760.4	299.215	1029.81	5.88341	3.72561e-07	Yes	1816.76	521.009	1168.88	3.48701	7.37513e-09	Yes
ENSG00000020633	864	RUNX3	RUNX family transcription factor 3	9.94363	4.75552	7.34958	2.09096	0.234337	No	14.0597	4.29198	9.17583	3.2758	0.00401759	Yes
ENSG00000020922	4361	MRE11	MRE11 homolog, double strand break repair nuclease	100.304	157.712	129.008	-1.57234	0.0783127	No	227.447	263.698	245.573	-1.15938	0.403287	No
ENSG00000021300	58473	PLEKHB1	pleckstrin homology domain containing B1	6971.04	374.807	3672.92	18.599	3.17064e-08	Yes	8073.53	438.049	4255.79	18.4306	7.16351e-16	Yes
ENSG00000021355	1992	SERPINB1	serpin family B member 1	279	73.4378	176.219	3.79913	0.00130893	Yes	439.98	71.3416	255.661	6.16723	6.85606e-14	Yes
ENSG00000021461	64816	CYP3A43	cytochrome P450 family 3 subfamily A member 43	0.649446	0.660116	0.654781	-1.01643	0.975093	No	6.27081	5.12992	5.70036	1.2224	0.46511	No
ENSG00000021488	11136	SLC7A9	solute carrier family 7 member 9	11.2022	16.7248	13.9635	-1.493	0.416199	No	35.6354	54.7535	45.1944	-1.53649	0.151847	No
ENSG00000021574	6683	SPAST	spastin	753.958	2343.69	1548.82	-3.10851	0.000473547	Yes	908.364	3058.03	1983.2	-3.36652	1.32716e-10	Yes
ENSG00000021645	9369	NRXN3	neurexin 3	7400.45	2107.7	4754.08	3.51114	7.04306e-05	Yes	10849.5	3702.67	7276.08	2.93018	1.21843e-12	Yes
ENSG00000021762	114879	OSBPL5	oxysterol binding protein like 5	290.648	866.31	578.479	-2.98061	3.13422e-05	Yes	319.655	1328.98	824.32	-4.15756	8.10572e-10	Yes
ENSG00000021776	9716	AQR	aquarius intron-binding spliceosomal factor	634.72	858.252	746.486	-1.35217	0.205183	No	739.883	1154.84	947.362	-1.56084	0.000409242	No
ENSG00000021826	1373	CPS1	carbamoyl-phosphate synthase 1	45.0873	26.1704	35.6288	1.72283	0.233421	No	82.0386	44.1453	63.092	1.85837	0.00411764	No
ENSG00000022267	2273	FHL1	four and a half LIM domains 1	5250.1	6257.88	5753.99	-1.19195	0.308143	No	6131.02	7642.57	6886.79	-1.24654	0.0580954	No
ENSG00000022277	51507	RTF2	replication termination factor 2	1723.36	1474.73	1599.05	1.1686	0.327071	No	1670.93	1321.53	1496.23	1.26439	0.0140184	No
ENSG00000022355	2554	GABRA1	gamma-aminobutyric acid type A receptor alpha1 subunit	9488.34	728.656	5108.5	13.0217	1.48806e-07	Yes	6792.88	576.159	3684.52	11.7899	4.6514e-13	Yes
ENSG00000022556	55655	NLRP2	NLR family pyrin domain containing 2	44.7337	165.394	105.064	-3.69731	0.0272389	Yes	20.1638	248.112	134.138	-12.3048	1.27877e-06	Yes
ENSG00000022567	57210	SLC45A4	solute carrier family 45 member 4	813.296	363.61	588.453	2.23673	0.00544824	Yes	747.756	523.441	635.598	1.42854	0.00136911	No
ENSG00000022840	9921	RNF10	ring finger protein 10	4843.36	5269.22	5056.29	-1.08793	0.653966	No	4501.23	5066.01	4783.62	-1.12547	0.151898	No
ENSG00000022976	55778	ZNF839	zinc finger protein 839	508.398	374.742	441.57	1.35666	0.0779545	No	390.238	317.894	354.066	1.22757	0.17275	No
ENSG00000023041	64429	ZDHHC6	zinc finger DHHC-type containing 6	443.615	616.378	529.996	-1.38944	0.0373136	No	780.133	898.409	839.271	-1.15161	0.0609747	No
ENSG00000023171	57476	GRAMD1B	GRAM domain containing 1B	9728.61	1717.49	5723.05	5.66442	3.90054e-07	Yes	14849.5	2628.14	8738.84	5.65021	4.50857e-14	Yes
ENSG00000023191	6050	RNH1	ribonuclease/angiogenin inhibitor 1	3696.9	1855.5	2776.2	1.9924	0.00216845	No	1870.37	938.758	1404.56	1.99239	0.000547386	No
ENSG00000023228	4719	NDUFS1	NADH:ubiquinone oxidoreductase core subunit S1	2582.04	1660.32	2121.18	1.55514	0.0101306	No	2785.32	2710.25	2747.78	1.0277	0.809657	No
ENSG00000023287	9821	RB1CC1	RB1 inducible coiled-coil 1	1983.63	2495.31	2239.47	-1.25795	0.402832	No	3132.63	3595.02	3363.82	-1.1476	0.304762	No
ENSG00000023318	23071	ERP44	endoplasmic reticulum protein 44	447.861	652.854	550.357	-1.45772	0.0367139	No	801.646	953.863	877.754	-1.18988	0.0516567	No
ENSG00000023330	211	ALAS1	5'-aminolevulinate synthase 1	3006.49	1472.63	2239.56	2.04157	0.000289231	Yes	2424.84	1293.42	1859.13	1.87474	4.33106e-09	No
ENSG00000023445	330	BIRC3	baculoviral IAP repeat containing 3	9.30928	7.08209	8.19568	1.31448	0.601388	No	22.8084	24.7887	23.7985	-1.08682	0.854398	No
ENSG00000023516	11215	AKAP11	A-kinase anchoring protein 11	4307.44	3212.39	3759.91	1.34088	0.343379	No	4172.69	4077.51	4125.1	1.02334	0.899942	No
ENSG00000023572	51022	GLRX2	glutaredoxin 2	113.893	75.6678	94.7802	1.50517	0.181535	No	107.472	69.2679	88.3701	1.55154	0.00104579	No
ENSG00000023608	6617	SNAPC1	small nuclear RNA activating complex polypeptide 1	60.327	92.6053	76.4662	-1.53506	0.19658	No	121.607	143.459	132.533	-1.17969	0.250868	No
ENSG00000023697	51071	DERA	deoxyribose-phosphate aldolase	260.833	305.709	283.271	-1.17205	0.595512	No	301.475	263.343	282.409	1.1448	0.382875	No
ENSG00000023734	11171	STRAP	serine/threonine kinase receptor associated protein	2683.11	3212.36	2947.74	-1.19725	0.291395	No	2718.5	3796.73	3257.62	-1.39662	0.000141061	No
ENSG00000023839	1244	ABCC2	ATP binding cassette subfamily C member 2	6.37003	3.94756	5.1588	1.61366	0.35499	No	48.3827	19.7491	34.0659	2.44987	0.000791319	Yes
ENSG00000023892	50619	DEF6	DEF6 guanine nucleotide exchange factor	39.3049	39.3814	39.3431	-1.00195	0.995836	No	76.5093	51.7745	64.1419	1.47774	0.0195068	No
ENSG00000023902	51177	PLEKHO1	pleckstrin homology domain containing O1	2097.24	2264.76	2181	-1.07988	0.732879	No	2536.29	1913.03	2224.66	1.3258	0.0743956	No
ENSG00000023909	2730	GCLM	glutamate-cysteine ligase modifier subunit	267.519	165.34	216.43	1.61799	0.0802335	No	347.063	230.341	288.702	1.50674	0.000128455	No
ENSG00000024048	23304	UBR2	ubiquitin protein ligase E3 component n-recognin 2	955.484	791.652	873.568	1.20695	0.396199	No	2173.21	1527.79	1850.5	1.42245	0.000723689	No
ENSG00000024422	30846	EHD2	EH domain containing 2	433.483	92.9426	263.213	4.66399	0.00295183	Yes	280.703	119.944	200.323	2.34028	0.000331924	Yes
ENSG00000024526	55635	DEPDC1	DEP domain containing 1	0.514458	62.3162	31.4153	-121.13	8.70937e-10	Yes	1.33194	126.217	63.7746	-94.7622	1.22031e-15	Yes
ENSG00000024862	25901	CCDC28A	coiled-coil domain containing 28A	306.413	109.839	208.126	2.78965	0.00139532	Yes	726.847	147.314	437.081	4.93399	5.15129e-16	Yes
ENSG00000025039	58528	RRAGD	Ras related GTP binding D	2180.44	1185.58	1683.01	1.83913	0.00291853	No	2181.75	1545.8	1863.78	1.4114	0.0139192	No
ENSG00000025156	3298	HSF2	heat shock transcription factor 2	547.714	1082.95	815.332	-1.97722	0.00234447	No	955.554	1555.51	1255.53	-1.62786	5.20239e-06	No
ENSG00000025293	51230	PHF20	PHD finger protein 20	1419.49	2262.65	1841.07	-1.59399	0.0677709	No	1550.51	1859.54	1705.03	-1.1993	0.174349	No
ENSG00000025423	8630	HSD17B6	hydroxysteroid 17-beta dehydrogenase 6	134.565	26.4798	80.5224	5.0818	0.000150047	Yes	329.218	40.7104	184.964	8.08683	5.29839e-09	Yes
ENSG00000025434	10062	NR1H3	nuclear receptor subfamily 1 group H member 3	166.284	123.952	145.118	1.34152	0.349744	No	196.286	122.072	159.179	1.60795	0.000486099	No
ENSG00000025708	1890	TYMP	thymidine phosphorylase	130.17	41.5811	85.8758	3.13052	0.0240782	Yes	174.379	25.2617	99.8206	6.90291	4.27122e-05	Yes
ENSG00000025770	29781	NCAPH2	non-SMC condensin II complex subunit H2	1813.34	1277.05	1545.2	1.41995	0.120016	No	1702.75	1543.48	1623.11	1.10319	0.532621	No
ENSG00000025772	10953	TOMM34	translocase of outer mitochondrial membrane 34	317.931	386.675	352.303	-1.21622	0.443855	No	348.479	373.57	361.025	-1.072	0.504631	No
ENSG00000025796	11231	SEC63	SEC63 homolog, protein translocation regulator	927.583	1716.92	1322.25	-1.85096	0.0108886	No	1846.05	2897.87	2371.96	-1.56977	5.46213e-05	No
ENSG00000025800	23633	KPNA6	karyopherin subunit alpha 6	2021.66	1726.74	1874.2	1.1708	0.501294	No	1676.37	1829.91	1753.14	-1.09159	0.259563	No
ENSG00000026025	7431	VIM	vimentin	1096.63	10583.5	5840.07	-9.65096	2.38538e-07	Yes	1479.23	19090.2	10284.7	-12.9055	3.32069e-10	Yes
ENSG00000026036	100533107	RTEL1-TNFRSF6B	RTEL1-TNFRSF6B readthrough (NMD candidate)	115.345	9.61386	62.4793	11.9978	0.000776718	Yes	277.61	111.866	194.738	2.48162	0.000300663	Yes
ENSG00000026103	355	FAS	Fas cell surface death receptor	16.2341	19.5798	17.9069	-1.20609	0.679419	No	44.4221	37.5123	40.9672	1.1842	0.507574	No
ENSG00000026297	8635	RNASET2	ribonuclease T2	115.226	178.46	146.843	-1.54878	0.197744	No	276.333	267.899	272.116	1.03148	0.842633	No
ENSG00000026508	960	CD44	CD44 molecule (Indian blood group)	186.165	199.774	192.97	-1.0731	0.88454	No	206.134	206.861	206.497	-1.00352	0.991392	No
ENSG00000026559	3755	KCNG1	potassium voltage-gated channel modifier subfamily G member 1	138.248	108.383	123.315	1.27555	0.529289	No	127.537	146.544	137.04	-1.14903	0.70686	No
ENSG00000026652	56895	AGPAT4	1-acylglycerol-3-phosphate O-acyltransferase 4	813.62	1158.87	986.246	-1.42434	0.0981083	No	1377.03	2658.49	2017.76	-1.9306	8.84855e-09	No
ENSG00000026751	57823	SLAMF7	SLAM family member 7	1.14156	0.718164	0.92986	1.58955	0.454247	No	1.26679	0.624523	0.945658	2.02842	0.0125706	Yes
ENSG00000026950	11119	BTN3A1	butyrophilin subfamily 3 member A1	271.275	310.253	290.764	-1.14369	0.45597	No	1092.85	638.781	865.816	1.71084	0.000874615	No
ENSG00000027001	4285	MIPEP	mitochondrial intermediate peptidase	170.332	274.473	222.403	-1.6114	0.100471	No	149.538	238.399	193.969	-1.59424	0.000176025	No
ENSG00000027075	5583	PRKCH	protein kinase C eta	163.264	103.66	133.462	1.57499	0.0793812	No	127.653	124.144	125.899	1.02826	0.906742	No
ENSG00000027644	3645	INSRR	insulin receptor related receptor	26.3429	13.2831	19.813	1.98318	0.149422	No	96.5549	31.9125	64.2337	3.02562	0.000208255	Yes
ENSG00000027697	3459	IFNGR1	interferon gamma receptor 1	666.279	612.735	639.507	1.08739	0.749515	No	966.695	776.518	871.606	1.24491	0.0127244	No
ENSG00000027847	11285	B4GALT7	beta-1,4-galactosyltransferase 7	459.451	427.403	443.427	1.07498	0.767969	No	360.473	376.875	368.674	-1.0455	0.767769	No
ENSG00000027869	9047	SH2D2A	SH2 domain containing 2A	6.00198	17.9642	11.9831	-2.99304	0.0211531	Yes	6.54534	7.82979	7.18756	-1.19624	0.658114	No
ENSG00000028116	7444	VRK2	VRK serine/threonine kinase 2	29.6173	46.5262	38.0718	-1.57091	0.179272	No	55.1336	74.0567	64.5952	-1.34322	0.0939715	No
ENSG00000028137	7133	TNFRSF1B	TNF receptor superfamily member 1B	132.235	123.653	127.944	1.06941	0.866057	No	116.131	95.0093	105.57	1.22231	0.317983	No
ENSG00000028203	55591	VEZT	vezatin, adherens junctions transmembrane protein	944.076	2026.08	1485.08	-2.1461	0.00218777	Yes	1459.12	3037.22	2248.17	-2.08154	9.42872e-08	Yes
ENSG00000028277	5452	POU2F2	POU class 2 homeobox 2	322.038	241.875	281.956	1.33142	0.285048	No	1156.71	1173.67	1165.19	-1.01466	0.953627	No
ENSG00000028310	65980	BRD9	bromodomain containing 9	1273.49	1337.81	1305.65	-1.05051	0.79606	No	1661.27	1575.1	1618.18	1.05471	0.613996	No
ENSG00000028528	6642	SNX1	sorting nexin 1	1356.11	1085.51	1220.81	1.24929	0.187086	No	2348.59	1820.94	2084.77	1.28977	0.00237186	No
ENSG00000028839	9519	TBPL1	TATA-box binding protein like 1	660.223	693.4	676.812	-1.05025	0.835639	No	975.155	1019.55	997.353	-1.04553	0.591878	No
ENSG00000029153	56938	ARNTL2	aryl hydrocarbon receptor nuclear translocator like 2	128.527	241.202	184.864	-1.87666	0.0439893	No	118.165	434.099	276.132	-3.67366	2.21909e-07	Yes
ENSG00000029363	9774	BCLAF1	BCL2 associated transcription factor 1	2850.12	4667	3758.56	-1.63747	0.049225	No	5812.31	6400.82	6106.56	-1.10125	0.341528	No
ENSG00000029364	55334	SLC39A9	solute carrier family 39 member 9	1503.59	1634.41	1569	-1.087	0.697204	No	1125.3	1660.55	1392.92	-1.47564	4.48539e-07	No
ENSG00000029534	286	ANK1	ankyrin 1	6864.37	901.063	3882.72	7.61808	2.09809e-06	Yes	6739.16	1208.43	3973.8	5.57677	6.03749e-12	Yes
ENSG00000029559	3381	IBSP	integrin binding sialoprotein	3.76545	5.80233	4.78389	-1.54094	0.600214	No	3.03386	1.85203	2.44294	1.63812	0.372325	No
ENSG00000029639	51106	TFB1M	transcription factor B1, mitochondrial	141.711	84.9358	113.323	1.66845	0.0182588	No	209.138	158.387	183.763	1.32043	0.00372003	No
ENSG00000029725	9135	RABEP1	rabaptin, RAB GTPase binding effector protein 1	2309.9	4391.06	3350.48	-1.90097	0.00941749	No	3063.2	5088.7	4075.95	-1.66124	2.34394e-05	No
ENSG00000029993	3149	HMGB3	high mobility group box 3	138.109	3860.63	1999.37	-27.9536	7.73531e-11	Yes	178.273	4765.92	2472.1	-26.7338	8.09527e-21	Yes
ENSG00000030066	23279	NUP160	nucleoporin 160	558.328	1421.5	989.912	-2.54599	9.55669e-06	Yes	1141.64	2010.1	1575.87	-1.76071	3.36961e-05	No
ENSG00000030110	578	BAK1	BCL2 antagonist/killer 1	286.378	164.711	225.545	1.73867	0.0582877	No	255.534	173.664	214.599	1.47143	0.00331219	No
ENSG00000030304	4593	MUSK	muscle associated receptor tyrosine kinase	2.44651	2.48884	2.46768	-1.0173	0.987571	No	1.05746	2.78185	1.91966	-2.63068	0.0975159	No
ENSG00000030419	22807	IKZF2	IKAROS family zinc finger 2	103.959	138.042	121.001	-1.32785	0.386331	No	196.384	379.741	288.062	-1.93367	0.000642055	No
ENSG00000030582	2896	GRN	granulin precursor	1073.29	1358.88	1216.08	-1.26609	0.508353	No	830.225	738.576	784.4	1.12409	0.542842	No
ENSG00000031003	51306	FAM13B	family with sequence similarity 13 member B	1595.68	1907.38	1751.53	-1.19534	0.522635	No	2383.09	3366.68	2874.88	-1.41273	0.0496981	No
ENSG00000031081	57514	ARHGAP31	Rho GTPase activating protein 31	376.948	610.991	493.97	-1.62089	0.191741	No	502.482	508.734	505.608	-1.01244	0.96657	No
ENSG00000031691	55166	CENPQ	centromere protein Q	84.2694	121.322	102.796	-1.4397	0.294624	No	109.596	155.535	132.565	-1.41917	0.0654865	No
ENSG00000031698	6301	SARS	seryl-tRNA synthetase	4181.29	3286.27	3733.78	1.27235	0.144456	No	4792.84	3561.55	4177.19	1.34572	0.00149392	No
ENSG00000031823	8498	RANBP3	RAN binding protein 3	1669.75	1749.69	1709.72	-1.04788	0.807388	No	1879.66	1672.13	1775.89	1.12411	0.30204	No
ENSG00000032219	5926	ARID4A	AT-rich interaction domain 4A	774.368	1200.3	987.333	-1.55004	0.100546	No	1385.19	1753.55	1569.37	-1.26592	0.0733855	No
ENSG00000032389	7260	EIPR1	EARP complex and GARP complex interacting protein 1	1244.95	1262.62	1253.78	-1.0142	0.954151	No	870.023	975.383	922.703	-1.1211	0.329635	No
ENSG00000032444	10908	PNPLA6	patatin like phospholipase domain containing 6	2124.32	1567.75	1846.04	1.35501	0.146816	No	1358.94	1227.75	1293.35	1.10685	0.598704	No
ENSG00000032742	8100	IFT88	intraflagellar transport 88	249.296	298.408	273.852	-1.197	0.45051	No	465.318	528.628	496.973	-1.13606	0.107847	No
ENSG00000033011	56052	ALG1	ALG1 chitobiosyldiphosphodolichol beta-mannosyltransferase	224.007	183.768	203.887	1.21897	0.438841	No	391.618	295.186	343.402	1.32668	0.0056861	No
ENSG00000033030	55596	ZCCHC8	zinc finger CCHC-type containing 8	342.464	442.306	392.385	-1.29154	0.159413	No	1187.28	975.619	1081.45	1.21695	0.111782	No
ENSG00000033050	10061	ABCF2	ATP binding cassette subfamily F member 2	1373.29	1079.69	1226.49	1.27193	0.173146	No	1425.87	1148.31	1287.09	1.24171	0.00349643	No
ENSG00000033100	54480	CHPF2	chondroitin polymerizing factor 2	486.357	469.473	477.915	1.03596	0.896327	No	493.876	498.752	496.314	-1.00987	0.944455	No
ENSG00000033122	57554	LRRC7	leucine rich repeat containing 7	54.3365	632.313	343.325	-11.637	1.07277e-06	Yes	42.5953	2038.91	1040.75	-47.8671	6.97801e-15	Yes
ENSG00000033170	2530	FUT8	fucosyltransferase 8	1175.29	1558.22	1366.75	-1.32581	0.173902	No	1176.55	1567.29	1371.92	-1.33211	0.0047229	No
ENSG00000033178	55236	UBA6	ubiquitin like modifier activating enzyme 6	648.541	975.298	811.919	-1.50383	0.127223	No	1781.59	2606.1	2193.85	-1.4628	0.000819607	No
ENSG00000033327	9846	GAB2	GRB2 associated binding protein 2	700.882	1751.15	1226.01	-2.49849	7.61477e-05	Yes	729.037	2199.4	1464.22	-3.01686	5.17507e-09	Yes
ENSG00000033627	535	ATP6V0A1	ATPase H+ transporting V0 subunit a1	9618.26	4022.79	6820.53	2.39094	0.00107	Yes	8323.03	5250.45	6786.74	1.5852	5.51886e-06	No
ENSG00000033800	8554	PIAS1	protein inhibitor of activated STAT 1	601.255	750.937	676.096	-1.24895	0.444593	No	851.773	1016.47	934.123	-1.19336	0.27176	No
ENSG00000033867	9497	SLC4A7	solute carrier family 4 member 7	219.721	630.576	425.148	-2.8699	0.0014244	Yes	446.45	1501.33	973.888	-3.3628	3.61557e-06	Yes
ENSG00000034053	321	APBA2	amyloid beta precursor protein binding family A member 2	6583.27	6030.78	6307.03	1.09161	0.709364	No	6668.87	5646.95	6157.91	1.18097	0.22752	No
ENSG00000034063	---	---	---	5.33883	599.167	302.253	-112.228	6.3684e-08	Yes	13.5896	441.829	227.709	-32.5124	2.98383e-09	Yes
ENSG00000034152	5606	MAP2K3	mitogen-activated protein kinase kinase 3	576.816	327.829	452.322	1.7595	0.00567928	No	553.928	368.862	461.395	1.50172	0.0108315	No
ENSG00000034239	79645	EFCAB1	EF-hand calcium binding domain 1	9.93258	45.0824	27.5075	-4.53884	0.0736921	No	18.3507	118.646	68.4983	-6.46549	9.91817e-05	Yes
ENSG00000034510	9168	TMSB10	thymosin beta 10	2810.15	33646	18228.1	-11.973	6.04954e-06	Yes	3698.81	23594.9	13646.9	-6.37905	4.07883e-15	Yes
ENSG00000034533	28990	ASTE1	asteroid homolog 1	130.942	201.91	166.426	-1.54198	0.033399	No	199.768	241.143	220.456	-1.20711	0.113976	No
ENSG00000034677	25897	RNF19A	ring finger protein 19A, RBR E3 ubiquitin protein ligase	1081.93	1134.05	1107.99	-1.04817	0.829882	No	1737.63	1770.94	1754.28	-1.01917	0.888182	No
ENSG00000034693	8504	PEX3	peroxisomal biogenesis factor 3	231.796	219.614	225.705	1.05547	0.856069	No	337.037	321.349	329.193	1.04882	0.667618	No
ENSG00000034713	11345	GABARAPL2	GABA type A receptor associated protein like 2	6142.18	3035.88	4589.03	2.0232	0.00371232	Yes	5331.25	3591.97	4461.61	1.48422	3.1537e-05	No
ENSG00000034971	4653	MYOC	myocilin	1.34394	0.955624	1.14978	1.40635	0.592788	No	1.32812	1.59088	1.4595	-1.19784	0.717321	No
ENSG00000035115	26751	SH3YL1	SH3 and SYLF domain containing 1	476.309	578.816	527.563	-1.21521	0.284889	No	1335.5	1293.98	1314.74	1.03209	0.692849	No
ENSG00000035141	84908	FAM136A	family with sequence similarity 136 member A	517.627	663.95	590.788	-1.28268	0.137279	No	766.036	725.332	745.684	1.05612	0.57841	No
ENSG00000035403	7414	VCL	vinculin	681.2	903.327	792.263	-1.32608	0.39424	No	1350.07	1267.89	1308.98	1.06482	0.689579	No
ENSG00000035499	55789	DEPDC1B	DEP domain containing 1B	6.49701	188.948	97.7224	-29.0823	3.86656e-07	Yes	12.3068	216.849	114.578	-17.6203	4.29372e-09	Yes
ENSG00000035664	23604	DAPK2	death associated protein kinase 2	47.3535	28.1455	37.7495	1.68245	0.127467	No	115.16	54.7474	84.9539	2.10349	0.000131743	Yes
ENSG00000035681	8439	NSMAF	neutral sphingomyelinase activation associated factor	485.719	444.501	465.11	1.09273	0.635205	No	1355.61	782.861	1069.24	1.73161	1.08851e-07	No
ENSG00000035687	159	ADSS	adenylosuccinate synthase	688.381	1232.29	960.338	-1.79014	0.00691158	No	915.902	1541.97	1228.94	-1.68355	1.20297e-07	No
ENSG00000035862	7077	TIMP2	TIMP metallopeptidase inhibitor 2	2239.01	6917.76	4578.38	-3.08965	2.12347e-06	Yes	1693.47	6789.17	4241.32	-4.00903	5.38872e-08	Yes
ENSG00000035928	5981	RFC1	replication factor C subunit 1	788.969	1281.45	1035.21	-1.6242	0.0206409	No	1213.79	1540.6	1377.19	-1.26925	0.0144065	No
ENSG00000036054	55773	TBC1D23	TBC1 domain family member 23	715.742	951.651	833.696	-1.3296	0.230794	No	1100.09	1084.41	1092.25	1.01446	0.883147	No
ENSG00000036257	8452	CUL3	cullin 3	2044.18	2828.57	2436.37	-1.38371	0.0826035	No	2258.71	3221.54	2740.13	-1.42628	9.81588e-05	No
ENSG00000036448	9172	MYOM2	myomesin 2	247.37	208.918	228.144	1.18405	0.507705	No	384.572	231.242	307.907	1.66307	0.0195483	No
ENSG00000036473	5009	OTC	ornithine carbamoyltransferase	3.12029	1.41621	2.26825	2.20327	0.202287	No	2.43204	1.60789	2.01996	1.51257	0.239071	No
ENSG00000036530	10858	CYP46A1	cytochrome P450 family 46 subfamily A member 1	468.899	258.961	363.93	1.81069	0.00425761	No	264.785	348.14	306.463	-1.3148	0.125989	No
ENSG00000036549	26009	ZZZ3	zinc finger ZZ-type containing 3	498.523	1057.27	777.895	-2.1208	0.00192502	Yes	761.669	1471.26	1116.47	-1.93163	3.01393e-06	No
ENSG00000036565	6570	SLC18A1	solute carrier family 18 member A1	0.7604	6.245	3.5027	-8.21279	0.000135403	Yes	0.690192	13.9441	7.31713	-20.2032	3.64436e-08	Yes
ENSG00000036672	9099	USP2	ubiquitin specific peptidase 2	936.538	106.418	521.478	8.80053	4.35489e-05	Yes	1094.14	108.588	601.362	10.076	1.2262e-14	Yes
ENSG00000036828	846	CASR	calcium sensing receptor	2.3285	1.85305	2.09077	1.25657	0.72858	No	0.412712	7.52331	3.96801	-18.2289	1.60085e-05	Yes
ENSG00000037042	27175	TUBG2	tubulin gamma 2	1595.65	446.059	1020.85	3.5772	7.38281e-07	Yes	3070.95	849.208	1960.08	3.61625	6.39681e-13	Yes
ENSG00000037241	51121	RPL26L1	ribosomal protein L26 like 1	182.331	369.926	276.128	-2.02887	0.00959584	Yes	209.133	329.689	269.411	-1.57646	0.00061446	No
ENSG00000037280	2324	FLT4	fms related tyrosine kinase 4	83.5616	236.822	160.192	-2.8341	0.00423168	Yes	73.8598	235.466	154.663	-3.18802	5.69267e-08	Yes
ENSG00000037474	54888	NSUN2	NOP2/Sun RNA methyltransferase 2	645.956	553.066	599.511	1.16795	0.442201	No	1875.84	1402.91	1639.38	1.33711	0.0345295	No
ENSG00000037637	54455	FBXO42	F-box protein 42	1077.94	1148.93	1113.43	-1.06585	0.745746	No	1439.07	1614.73	1526.9	-1.12207	0.100031	No
ENSG00000037749	4238	MFAP3	microfibril associated protein 3	958.705	1483.04	1220.87	-1.54692	0.0801042	No	956.495	1935.43	1445.96	-2.02346	2.20797e-05	Yes
ENSG00000037757	84245	MRI1	methylthioribose-1-phosphate isomerase 1	228.347	90.2682	159.308	2.52965	0.0050846	Yes	749.196	470.939	610.068	1.59086	0.000546555	No
ENSG00000037897	4234	METTL1	methyltransferase like 1	74.0474	102.551	88.2991	-1.38493	0.233305	No	76.9838	80.4039	78.6938	-1.04443	0.747	No
ENSG00000038002	175	AGA	aspartylglucosaminidase	123.405	121.662	122.533	1.01432	0.974003	No	164.005	130.763	147.384	1.25421	0.154521	No
ENSG00000038210	55300	PI4K2B	phosphatidylinositol 4-kinase type 2 beta	66.4824	101.533	84.0079	-1.52722	0.13515	No	211.213	224.887	218.05	-1.06474	0.668406	No
ENSG00000038219	259282	BOD1L1	biorientation of chromosomes in cell division 1 like 1	2072.71	1698.17	1885.44	1.22056	0.542276	No	3599.61	2912.89	3256.25	1.23575	0.143319	No
ENSG00000038274	27430	MAT2B	methionine adenosyltransferase 2B	2130.81	852.003	1491.41	2.50094	4.61706e-06	Yes	2070.02	978.24	1524.13	2.11606	2.28034e-06	Yes
ENSG00000038295	7092	TLL1	tolloid like 1	682.524	732.513	707.519	-1.07324	0.771456	No	1191.12	266.717	728.918	4.46586	3.72751e-05	Yes
ENSG00000038358	23644	EDC4	enhancer of mRNA decapping 4	1964.19	1518.1	1741.15	1.29385	0.324236	No	2160.28	1606.38	1883.33	1.34482	0.00338229	No
ENSG00000038382	7204	TRIO	trio Rho guanine nucleotide exchange factor	4845.03	7533.26	6189.14	-1.55484	0.127621	No	5622.21	9339.36	7480.79	-1.66116	0.00011211	No
ENSG00000038427	1462	VCAN	versican	906.302	6192.68	3549.49	-6.83291	3.77159e-07	Yes	1128.81	10056.4	5592.63	-8.90887	7.25658e-11	Yes
ENSG00000038532	23274	CLEC16A	C-type lectin domain containing 16A	1384.13	1475.26	1429.69	-1.06584	0.796004	No	1610.17	1584.39	1597.28	1.01627	0.845535	No
ENSG00000038945	4481	MSR1	macrophage scavenger receptor 1	47.4473	5.94817	26.6977	7.97678	0.0032785	Yes	104.289	6.35835	55.3239	16.402	1.95193e-10	Yes
ENSG00000039068	999	CDH1	cadherin 1	9.43498	51.1985	30.3167	-5.42645	0.000558984	Yes	23.9363	166.262	95.0989	-6.94599	9.53769e-05	Yes
ENSG00000039123	23517	MTREX	Mtr4 exosome RNA helicase	1067.87	1457.61	1262.74	-1.36496	0.0870848	No	1475.61	1910.01	1692.81	-1.29438	0.00246816	No
ENSG00000039139	1767	DNAH5	dynein axonemal heavy chain 5	40.101	97.833	68.967	-2.43966	0.0228088	Yes	67.9438	141.018	104.481	-2.0755	0.000980136	Yes
ENSG00000039319	9765	ZFYVE16	zinc finger FYVE-type containing 16	787.748	684.004	735.876	1.15167	0.595508	No	2237.53	1812.39	2024.96	1.23458	0.109814	No
ENSG00000039523	79567	RIPOR1	RHO family interacting cell polarization regulator 1	2342.69	1560.46	1951.58	1.50129	0.0390814	No	3373.32	2798.83	3086.08	1.20526	0.0761616	No
ENSG00000039537	729	C6	complement C6	3.03073	3.99592	3.51332	-1.31847	0.76078	No	15.3451	6.91599	11.1305	2.21878	0.0128345	Yes
ENSG00000039560	26064	RAI14	retinoic acid induced 14	249.393	528.209	388.801	-2.11798	0.000411797	Yes	474.562	858.195	666.378	-1.80839	0.0160556	No
ENSG00000039600	11063	SOX30	SRY-box 30	3.04684	11.3406	7.19374	-3.7221	0.00538221	Yes	4.74594	8.29737	6.52166	-1.74831	0.12924	No
ENSG00000039650	11284	PNKP	polynucleotide kinase 3'-phosphatase	412.854	351.892	382.373	1.17324	0.526147	No	741.699	582.252	661.976	1.27385	0.14407	No
ENSG00000039987	54831	BEST2	bestrophin 2	1.4781	1.69904	1.58857	-1.14947	0.809538	No	1.33885	1.96978	1.65432	-1.47125	0.212965	No
ENSG00000040199	23035	PHLPP2	PH domain and leucine rich repeat protein phosphatase 2	1076.32	515.657	795.987	2.08727	0.00608306	Yes	1697.96	1173.25	1435.6	1.44722	0.000451841	No
ENSG00000040275	54908	SPDL1	spindle apparatus coiled-coil protein 1	161.329	393.046	277.187	-2.4363	0.000343504	Yes	445.729	653.969	549.849	-1.46719	0.000541283	No
ENSG00000040341	27067	STAU2	staufen double-stranded RNA binding protein 2	1335.7	2254.54	1795.12	-1.68791	0.0255755	No	1598.41	3384.8	2491.61	-2.1176	1.87657e-07	Yes
ENSG00000040487	54896	PQLC2	PQ loop repeat containing 2	427.632	205.376	316.504	2.08219	0.00172838	Yes	484.575	204.046	344.31	2.37483	4.98916e-06	Yes
ENSG00000040531	1497	CTNS	cystinosin, lysosomal cystine transporter	157.51	226.269	191.889	-1.43653	0.226728	No	208.239	238.747	223.493	-1.14651	0.261312	No
ENSG00000040608	65078	RTN4R	reticulon 4 receptor	3423.77	763.762	2093.76	4.48276	4.48236e-06	Yes	1050.15	399.177	724.662	2.63078	0.00397028	Yes
ENSG00000040633	79142	PHF23	PHD finger protein 23	725.671	1182.4	954.036	-1.62939	0.00329768	No	744.481	1014.85	879.663	-1.36316	0.020034	No
ENSG00000040731	1008	CDH10	cadherin 10	910.465	373.2	641.833	2.43962	0.00103216	Yes	1728.16	660.025	1194.09	2.61833	5.26981e-06	Yes
ENSG00000040933	3631	INPP4A	inositol polyphosphate-4-phosphatase type I A	3365.59	2572.66	2969.13	1.30821	0.204633	No	3659.14	3011.58	3335.36	1.21502	0.0905498	No
ENSG00000041353	5874	RAB27B	RAB27B, member RAS oncogene family	50.7358	190.963	120.849	-3.76386	0.00387721	Yes	47.2385	627.408	337.323	-13.2817	2.70024e-09	Yes
ENSG00000041357	5685	PSMA4	proteasome subunit alpha 4	1009.67	1544.98	1277.33	-1.53018	0.108077	No	1619.26	1974.32	1796.79	-1.21927	0.088416	No
ENSG00000041515	23026	MYO16	myosin XVI	243.717	1412.15	827.936	-5.79423	8.35757e-08	Yes	176.602	1350.54	763.569	-7.64734	1.00426e-09	Yes
ENSG00000041802	55341	LSG1	large 60S subunit nuclear export GTPase 1	416.359	543.523	479.941	-1.30542	0.175052	No	495.069	685.297	590.183	-1.38424	0.00183855	No
ENSG00000041880	10039	PARP3	poly(ADP-ribose) polymerase family member 3	161.775	115.305	138.54	1.40302	0.130385	No	303.096	183.82	243.458	1.64887	6.94955e-05	No
ENSG00000041982	3371	TNC	tenascin C	27.5456	6498.73	3263.14	-235.926	4.82138e-07	Yes	22.6577	4281.81	2152.23	-188.978	3.6611e-09	Yes
ENSG00000041988	90326	THAP3	THAP domain containing 3	523.171	405.808	464.49	1.28921	0.275799	No	671.379	488.716	580.047	1.37376	0.0175457	No
ENSG00000042062	140876	RIPOR3	RIPOR family member 3	46.858	23.7037	35.2809	1.97682	0.227664	No	58.7173	179.324	119.021	-3.05403	0.00136975	Yes
ENSG00000042088	55775	TDP1	tyrosyl-DNA phosphodiesterase 1	252.22	421.319	336.77	-1.67044	0.0139184	No	384.365	628.969	506.667	-1.63639	8.19816e-06	No
ENSG00000042286	84883	AIFM2	apoptosis inducing factor mitochondria associated 2	142.969	71.0329	107.001	2.01272	0.0121672	Yes	447.501	115.633	281.567	3.87002	3.24936e-10	Yes
ENSG00000042304	56918	C2orf83	chromosome 2 open reading frame 83	0.516329	0.760599	0.638464	-1.47309	0.377123	No	0.668217	0.64401	0.656113	1.03759	0.903786	No
ENSG00000042317	55812	SPATA7	spermatogenesis associated 7	367.755	366.851	367.303	1.00247	0.993539	No	843.216	581.058	712.137	1.45117	0.000559963	No
ENSG00000042429	9440	MED17	mediator complex subunit 17	504.823	862.184	683.503	-1.70789	0.00591178	No	852.367	1167.72	1010.04	-1.36997	0.00628829	No
ENSG00000042445	54884	RETSAT	retinol saturase	817.025	367.75	592.387	2.22169	0.00117982	Yes	1131.59	426.265	778.927	2.65466	2.47015e-13	Yes
ENSG00000042493	822	CAPG	capping actin protein, gelsolin like	145.163	130.481	137.822	1.11253	0.80314	No	168.24	67.4998	117.87	2.49245	3.8009e-05	Yes
ENSG00000042753	1175	AP2S1	adaptor related protein complex 2 subunit sigma 1	1726.4	1441.87	1584.14	1.19733	0.419583	No	1099.02	1004.42	1051.72	1.09418	0.522759	No
ENSG00000042781	7399	USH2A	usherin	10.2905	26.3639	18.3272	-2.56195	0.0178655	Yes	9.09314	20.2087	14.6509	-2.22241	0.0138994	Yes
ENSG00000042832	7038	TG	thyroglobulin	4.29906	44.4007	24.3499	-10.328	2.54216e-05	Yes	4.25132	21.6213	12.9363	-5.08578	8.42415e-08	Yes
ENSG00000042980	10863	ADAM28	ADAM metallopeptidase domain 28	18.6313	33.8146	26.223	-1.81493	0.106508	No	61.1638	61.9663	61.565	-1.01312	0.95963	No
ENSG00000043039	8538	BARX2	BARX homeobox 2	10.2088	2.64003	6.42443	3.86694	0.207271	No	11.1074	3.82772	7.46755	2.90182	0.0178997	Yes
ENSG00000043093	54165	DCUN1D1	defective in cullin neddylation 1 domain containing 1	549.056	750.051	649.554	-1.36607	0.319584	No	931.371	1133.95	1032.66	-1.21751	0.0597907	No
ENSG00000043143	23338	JADE2	jade family PHD finger 2	2426.15	143.249	1284.7	16.9365	1.94195e-08	Yes	1977.79	158.903	1068.35	12.4465	2.74328e-11	Yes
ENSG00000043355	7546	ZIC2	Zic family member 2	7345.39	6846.52	7095.96	1.07287	0.781302	No	8404.84	3993.31	6199.08	2.10473	0.00752338	Yes
ENSG00000043462	3937	LCP2	lymphocyte cytosolic protein 2	33.3925	33.4315	33.412	-1.00117	0.997629	No	64.8848	37.8624	51.3736	1.7137	0.0100777	No
ENSG00000043514	54802	TRIT1	tRNA isopentenyltransferase 1	288.364	321.238	304.801	-1.114	0.577539	No	764.478	787.161	775.819	-1.02967	0.860363	No
ENSG00000043591	153	ADRB1	adrenoceptor beta 1	30.5271	9.69943	20.1132	3.14731	0.032601	Yes	25.8891	10.4146	18.1518	2.48584	0.00704013	Yes
ENSG00000044090	9820	CUL7	cullin 7	1431.74	1384.82	1408.28	1.03388	0.883789	No	1928.24	1947.62	1937.93	-1.01005	0.91747	No
ENSG00000044115	1495	CTNNA1	catenin alpha 1	2131.72	4764.53	3448.12	-2.23506	0.00115705	Yes	2647.66	4466.82	3557.24	-1.68708	3.79602e-05	No
ENSG00000044446	5256	PHKA2	phosphorylase kinase regulatory subunit alpha 2	430.489	410.358	420.423	1.04906	0.855483	No	1559.21	782.089	1170.65	1.99365	3.99138e-10	No
ENSG00000044459	54875	CNTLN	centlein	113.387	279.509	196.448	-2.46509	0.00127711	Yes	306.062	396.923	351.493	-1.29687	0.110968	No
ENSG00000044524	2042	EPHA3	EPH receptor A3	119.688	824.693	472.19	-6.89035	2.38855e-06	Yes	87.2576	1007.34	547.301	-11.5445	2.62521e-07	Yes
ENSG00000044574	3309	HSPA5	heat shock protein family A (Hsp70) member 5	5215.47	6428.42	5821.94	-1.23257	0.244333	No	4674.66	6353.37	5514.02	-1.35911	0.000948397	No
ENSG00000046604	1829	DSG2	desmoglein 2	7.15619	180.858	94.007	-25.2729	0.000182542	Yes	13.8075	145.329	79.5683	-10.5254	7.45238e-08	Yes
ENSG00000046647	54960	GEMIN8	gem nuclear organelle associated protein 8	228.384	303.814	266.099	-1.33027	0.222856	No	417.083	439.346	428.215	-1.05338	0.615236	No
ENSG00000046651	8481	OFD1	OFD1 centriole and centriolar satellite protein	206.638	316.348	261.493	-1.53093	0.0507852	No	1104.71	902.258	1003.48	1.22438	0.100713	No
ENSG00000046653	2824	GPM6B	glycoprotein M6B	8255.66	8850.55	8553.11	-1.07206	0.838599	No	11049.4	9287.88	10168.6	1.18965	0.260822	No
ENSG00000046889	80243	PREX2	phosphatidylinositol-3,4,5-trisphosphate dependent Rac exchange factor 2	418.185	282.856	350.52	1.47844	0.373617	No	645.46	554.727	600.094	1.16356	0.444284	No
ENSG00000047056	22884	WDR37	WD repeat domain 37	1309.95	1406.21	1358.08	-1.07348	0.751799	No	1346.08	1681.4	1513.74	-1.2491	0.00767626	No
ENSG00000047188	64848	YTHDC2	YTH domain containing 2	700.17	870.788	785.479	-1.24368	0.316203	No	2515.93	2136.07	2326	1.17783	0.138386	No
ENSG00000047230	56474	CTPS2	CTP synthase 2	264.382	549.542	406.962	-2.07859	0.000405062	Yes	513.058	787.155	650.106	-1.53424	0.000244509	No
ENSG00000047249	51606	ATP6V1H	ATPase H+ transporting V1 subunit H	2816.48	1702.36	2259.42	1.65445	0.00390598	No	2016.27	1822.73	1919.5	1.10618	0.27397	No
ENSG00000047315	5431	POLR2B	RNA polymerase II subunit B	2708.44	3897.58	3303.01	-1.43905	0.0718221	No	3247.37	4589.34	3918.35	-1.41325	0.000278451	No
ENSG00000047346	56204	FAM214A	family with sequence similarity 214 member A	910.863	480.764	695.814	1.89462	0.00461638	No	2596.53	1093.89	1845.21	2.37367	7.71593e-11	Yes
ENSG00000047365	116984	ARAP2	ArfGAP with RhoGAP domain, ankyrin repeat and PH domain 2	508.574	114.788	311.681	4.43056	0.00113125	Yes	717.725	306.373	512.049	2.34265	0.00614943	Yes
ENSG00000047410	7175	TPR	translocated promoter region, nuclear basket protein	1595.73	2832.94	2214.33	-1.77532	0.0461556	No	3677.35	5005.39	4341.37	-1.36114	0.00355572	No
[truncated: 23,352 more rows]
