# Supplementary material for: Transposable elements and their KZFP controllers are drivers of transcriptional innovation in the developing human brain
Source: HighWire-hosted journal article supplement (doi:10.1101/gr.275133.120), 2021-08-16
Supplement: Supplemental_Table_S4.xlsx [file Supplemental_Table_S4.xlsx]

## Sheet: Legend
Supplemental Table S4 –TE subfamily expression values in counts per million (CPM) for DFC and CB from both Brainspan (BS) and Cardoso (CM) datasets.

## Sheet: DFC_TE_Subfam_CPM_Exp
TE.subfam	BS.mean.1	BS.mean.2A	BS.mean.2B	BS.mean.3A	BS.mean.3B	BS.mean.4	BS.mean.5	BS.mean.6	BS.mean.7	BS.mean.8	BS.mean.9	BS.mean.10	BS.mean.11	CM.mean.1	CM.mean.2A	CM.mean.2B	CM.mean.3A	CM.mean.3B	CM.mean.4	CM.mean.5	CM.mean.6	CM.mean.7	CM.mean.8	CM.mean.9	CM.mean.10	CM.mean.11
Alu		9.81031	10.08	7.80285	13.33	14.7071	9.67962	15.7993	9.85738	24.1395	35.145	17.6352	13.0344	74.7278	72.1816	64.3231	53.8852	93.9624	70.7019		48.673	42.6769	35.1072	48.3292	41.0291	42.9799
AluJb		1009.1	1141.16	854.806	1687.24	1437.24	1074.99	1459.87	919.211	1791.72	3124.04	1395.62	1126.88	3724.06	3340.52	3090.93	2631.3	4832.95	3741.31		2447.86	2011.65	1768.21	2520.97	1968.81	2111.85
AluJo		293.381	388.795	301.594	602.745	546.529	399.255	546.419	332.864	618.964	1081.06	498.966	420.025	1301.34	1228.12	1109	958.464	1820.49	1388.89		913.824	790.974	638.069	847.754	715.411	787.429
AluJr		831.371	1010.34	793.181	1541.98	1415.41	979.625	1358.2	844.397	1702.5	2857.13	1316.61	1076.23	3494.99	3107.5	2843.33	2430.53	4514.2	3486.95		2302.13	1974.29	1665.99	2218.35	1829.14	2025.34
AluJr4		78.4129	103.879	80.3273	145.946	132.379	82.9118	116.879	72.208	141.892	267.079	116.945	93.2842	356.555	285.712	267.59	241.155	441.694	341.354		225.465	176.299	140.379	197.063	158.532	178.039
AluSc		258.411	331.52	261.737	486.325	407.454	419.885	577.988	292.764	537.871	1014.59	440.103	351.024	1004.83	1085.07	1016.16	883.636	1449.13	1169.82		798.526	629.169	665.396	797.578	647.805	663.891
AluSc5		25.2681	32.2545	25.7231	52.7063	39.7639	42.5616	58.9919	34.1035	50.5172	105.797	45.9128	39.4866	87.9298	85.2636	77.7154	62.2221	123.304	92.3462		67.5281	51.267	49.7429	62.0932	53.0122	59.3994
AluSc8		163.143	205.301	153.6	279.79	227.475	253.581	298.444	152.294	283.377	537.837	234.232	186.082	515.19	548.754	505.912	397.788	702.756	559.062		403.959	355.95	330.587	400.35	338.677	353.085
AluSg		329.83	444.717	339.962	649.136	537.518	574.493	674.401	364.038	642.179	1268.06	561.08	474.548	1302.5	1302.08	1195.73	967.646	1740.56	1360.74		969.303	800.949	779.751	933.607	792.196	832.512
AluSg4		82.7892	97.1579	77.711	148.044	127.797	132.311	157.749	88.3688	154.682	279.014	129.206	106.105	262.538	282.507	255.193	203.76	407.544	317.893		224.064	164.911	154.306	220.326	178.702	168.311
AluSg7		42.4479	50.5949	35.7986	75.0331	61.7508	73.788	93.975	45.1773	113.897	164.529	80.3945	64.8577	184.904	171.914	158.077	120.597	206.479	161.758		106.521	87.9296	88.0099	106.843	85.4179	88.6643
AluSp		519.352	663.334	511.628	976.698	811.035	889.649	1046.57	593.746	1032.77	1868.38	854.697	703.585	1937.04	1936.67	1772.34	1460.22	2578	2020		1455.97	1195.83	1092.51	1343.85	1123.53	1197.74
AluSq		86.5393	119.591	93.8697	188.006	154.095	173.311	179.207	98.4407	184.037	333.823	149.315	122.243	374.55	386.202	348.647	310.74	563.65	437.249		310.242	219.444	221.264	254.273	223.685	254.374
AluSq10		14.306	17.4984	15.1331	22.1839	20.6236	17.29	17.0977	9.49463	17.2915	34.3373	13.5476	11.8662	30.7039	29.1965	26.5463	21.0472	39.9883	32.5028		20.6542	15.3749	15.2978	20.5622	15.9756	17.4558
AluSq2		358.503	477.171	375.403	704.348	616.236	618.35	748.541	411.376	722.739	1423.01	631.336	514.498	1441.33	1414.78	1305.05	1058.91	1882.68	1462.23		1061.63	895.993	896.861	1128.09	914.164	917.682
AluSq4		6.48853	10.7898	7.02795	16.6343	13.5575	15.0324	16.8811	9.11365	23.719	39.4216	15.3671	13.1962	50.5134	48.2894	44.0708	38.0514	78.8864	53.5949		40.5644	28.2176	28.9461	38.4767	30.1585	31.003
AluSx		1062.89	1216.8	942.954	1770.32	1449.98	1535.1	1866.69	1025.18	2547.31	3423.06	1591.25	1300.18	3527.27	3495.45	3195.95	2595.35	4782.37	3745.19		2563.14	2076.22	1902.23	3208.42	2018.7	2237.11
AluSx1		804.997	1131.95	939.645	1575.6	1407.71	1388.66	1605.09	822.78	1490.9	3004.57	1271.52	1054.87	3001.55	3113.13	2814.39	2411.69	4273.25	3430.28		2401.35	1901.19	1796.11	2186.15	1852.95	1943.6
AluSx3		213.215	286.283	212.774	448.067	364.221	359.187	440.043	246.539	486.775	886.76	383.978	312.353	942.841	946.057	856.947	702.748	1302.52	1013.6		711.884	578.441	553.054	656.174	562.852	595.628
AluSx4		87.4792	101.344	74.1281	149.54	120.666	125.145	160.203	85.1126	161.151	301.677	133.791	111.595	289.048	280.656	249.574	202.272	382.338	294.285		218.604	182.061	178.075	254.474	184.007	182.761
AluSz		788.577	1087.9	807.265	1622.35	1370.38	1349.51	1642.7	912.22	1672	3409.94	1457.97	1219.83	3343.83	3171.22	2941.81	2440.15	4668.01	3571.16		2403.19	1994.95	1777.53	2310.94	1922.67	2077.2
AluSz6		302.617	388.437	282.536	587.752	486.006	435.722	536.643	311.716	609.788	1147.83	498.537	409.405	1232.69	1110.89	1028.11	841.543	1607.17	1227.03		826.849	671.073	602.861	782.489	621.193	691.268
AluY		552.843	684.456	570.121	1079.32	871.429	939.014	1294.94	665.012	1296.34	2283.55	995.882	697.447	1863.77	1900.09	1731.16	1385.68	2509.94	1950.93		1467.92	1219.92	1208.07	1524.59	1221.3	1164.11
AluYa5		10.9832	17.1643	14.8717	21.9191	17.2024	17.9341	32.02	15.9447	42.8052	41.5783	22.9729	12.4898	22.1908	28.176	26.7072	19.7261	36.3151	26.1628		24.7441	25.1384	22.4327	31.8091	26.82	17.3257
AluYa8		0.526246	0.850635	0.751425	1.45275	1.07973	0.950797	1.63738	0.569068	3.04079	2.74203	0.937207	0.892217	8.16237	5.48323	6.27534	7.33063	10.424	7.5322		5.88068	5.34862	4.76291	3.74409	4.4757	5.3961
AluYb8		11.0255	9.62348	9.26017	15.5286	12.3452	12.8978	18.7175	11.0159	24.7363	26.6889	12.4254	8.27392	18.3832	18.2911	16.6857	11.9482	23.9791	19.1534		16.267	25.2985	15.3424	27.5578	15.7338	12.2707
AluYb9		1.29978	1.16217	1.08581	1.72886	1.42046	1.32796	1.8587	1.46335	3.34759	3.99916	1.72763	1.01162	2.55586	2.44032	2.00563	1.41988	2.62356	1.79595		2.08346	2.57913	2.08801	3.14047	2.66006	1.96964
AluYc		26.7397	30.5717	24.4536	46.9592	37.4921	39.8607	58.7204	33.96	65.1086	100.935	50.5639	34.058	78.5358	82.4256	83.5384	74.0796	140.101	100.582		90.5295	69.8854	77.652	85.9146	71.8845	66.5447
AluYc3		4.63562	3.93413	3.61345	7.37635	5.42964	6.40782	7.38682	4.97667	12.2702	12.9499	6.944	4.27194	17.5793	20.6584	15.4992	11.6002	20.4984	14.1732		12.8619	12.0275	13.6896	14.6878	13.0565	10.345
AluYd8		0.512638	0.605533	0	0.737833	0.570456	0.736901	1.3097	1.02044	2.35153	2.754	1.01833	0.59509	1.26233	1.10969	1.00205	1.17685	1.77863	1.08957		1.11013	3.83634	1.93036	2.79859	1.61103	1.18507
AluYe5		4.307	5.09449	3.95497	10.1289	6.65571	8.68759	12.7397	5.77323	14.0896	20.5851	10.6267	5.81058	11.5457	9.86063	9.71642	6.6505	15.6801	12.1907		11.1081	10.2036	7.95654	12.3763	8.20368	7.05965
AluYe6		0.519283	0.949932	0.876933	1.72637	1.41613	1.73195	2.20326	1.15138	3.592	3.94917	1.75761	0.968858	1.88356	2.31154	2.03781	1.45013	2.1713	1.97932		1.64746	2.01362	2.36725	1.95317	1.76835	1.41945
AluYf1		11.9773	16.4966	13.3943	20.6271	18.7872	19.4488	26.184	13.5056	25.078	49.2676	20.2082	12.7245	42.2576	45.3787	41.5466	34.25	59.4959	45.793		36.5797	28.9028	28.8626	40.2768	31.0033	29.2665
AluYg6		6.36452	7.39377	7.67854	7.62559	7.1711	4.7104	6.15821	5.23942	6.95006	10.2879	4.402	3.73176	7.87565	8.20716	7.98127	7.11495	10.6881	8.95428		8.12161	7.68169	8.04033	8.56129	6.84819	5.2813
AluYh3		2.28023	2.93467	2.10995	5.75416	3.57753	3.37607	5.55051	2.89999	5.6147	10.3058	4.90756	3.18685	12.0998	13.7449	10.4145	8.26405	14.2145	12.29		9.18868	8.07768	8.20217	12.7603	7.86867	7.42477
AluYh3a3		0.700869	1.0462	0.566719	1.43585	1.33155	1.2874	1.06459	0.712145	2.39841	3.83933	1.40984	0.952108	4.26434	6.51862	5.15103	4.30084	11.156	8.56287		7.88425	5.00636	2.90436	5.09687	4.02714	5.30901
AluYh7		1.79891	1.65115	1.31454	3.80676	2.26133	2.69851	2.5437	1.54622	4.04019	5.47124	2.50343	2.00496	6.08535	7.66676	6.55109	4.23986	9.53093	6.99264		4.16952	3.09494	1.99369	4.72954	3.19131	2.70536
AluYh9		0	0	0	0.544665	0.414261	0	0	0	0.901785	1.33795	0.516002	0	0.874238	0.690169	0.657726	0	1.14259	0.602468		0.612886	1.01165	0	0.783391	0.496974	0.554079
AluYi6		2.69357	2.20139	2.45198	3.26384	3.03289	1.90461	3.28078	2.37795	4.01572	4.4106	2.63715	1.62807	4.542	4.51873	4.97833	4.26498	7.25055	6.45933		4.97784	3.44085	4.10355	7.14079	4.48353	2.99907
AluYi6_4d		0	0	0	0	0	0	0	0	0.590288	0.615558	0	0	0.907932	0.816383	0.768623	0.821393	1.40086	1.01568		0.522311	0.447302	0	0	0	0
AluYj4		14.6832	19.4004	16.7554	27.2956	25.0834	24.4116	33.4419	16.9687	37.5729	58.4692	25.2182	17.2329	44.9604	49.7647	41.278	32.069	73.0866	55.4603		47.6166	45.8564	51.8067	62.7615	48.3633	44.0775
AluYk11		0.642894	0.89044	0.474493	0.885334	0.869684	0.595086	1.38588	0.628136	1.61119	2.93316	1.14298	0.663825	2.67305	1.93556	2.25501	1.63865	3.58706	2.47324		2.16813	1.45164	1.50666	2.23753	1.89678	1.70525
AluYk12		0	0	0	0	0	0	0	0	0.660149	0.866043	0	0	0.772214	0.776074	0.574705	0.48486	0.950482	0.647435		0.47899	0	0	0.722594	0.492479	0
AluYk2		41.1696	49.131	42.7892	78.029	61.7055	65.4649	88.3303	46.9148	98.0189	158.389	71.3741	56.5274	119.598	124.293	122.089	100.841	173.295	140.359		105.423	87.8079	83.3709	142.199	101.684	85.7929
AluYk3		32.8055	45.6994	38.8384	71.1899	60.6155	61.2406	76.9671	36.5009	76.6838	130.871	55.8643	39.4369	93.7351	96.4091	84.7623	65.1123	123.86	97.3982		68.5028	61.0536	59.9143	77.4287	58.7978	53.0888
AluYk4		5.21131	8.90881	7.35221	12.8169	9.34517	8.16492	12.3842	6.63776	14.3485	22.7496	10.43	7.67922	16.0191	13.0547	14.2356	10.4046	20.8413	14.4202		9.86636	8.22753	8.86504	16.0031	9.11277	8.41292
AluYm1		27.5224	33.2023	26.6827	55.1008	41.9289	45.0992	59.0333	32.6646	60.508	107.839	48.5403	36.8438	77.71	84.3852	75.9656	59.0097	104.549	82.6913		72.637	54.8537	59.1842	69.64	58.9322	60.278
AmnSINE1		6.19213	10.8873	6.5347	12.3826	12.9094	8.42374	10.367	9.92714	16.1424	33.8431	12.3468	11.2299	81.5614	103.402	101.085	109.022	150.863	131.326		109.819	113.886	85.4126	115.702	108.669	103.292
AmnSINE2		2.86131	3.68547	3.03933	4.39649	5.14927	2.46416	3.67224	2.74828	4.82222	9.02041	3.37412	3.27248	16.5147	19.203	15.1824	20.8752	25.3114	21.4744		19.9294	18.0711	16.6579	27.8122	28.2489	26.2229
Arthur1		2.62706	5.9882	5.35476	4.72421	8.10131	5.14624	8.58563	7.62571	13.2883	32.8595	11.9295	8.75151	13.1389	17.2723	13.1041	12.1429	22.9102	17.9186		14.1564	21.0677	16.7231	24.4097	23.7408	23.9168
Arthur1A		3.2442	3.14546	3.06402	3.71243	3.37338	2.22914	3.91616	2.4243	6.67004	13.7601	3.46388	3.30698	18.5028	15.783	13.2795	11.4247	18.1117	14.6583		10.7281	12.4569	6.06601	13.0218	7.79045	9.28772
Arthur1B		4.95855	6.74383	6.22512	7.41886	11.4342	5.86705	11.4506	9.02445	16.7756	40.0011	12.1028	10.2203	16.1977	25.2968	21.1936	17.9359	32.4314	25.7252		24.1603	23.0102	16.0025	21.8142	20.157	21.1495
Arthur1C		1.39093	0.901841	1.27734	2.12219	3.33571	2.16243	1.85394	1.79641	3.85276	8.51276	2.00699	2.31873	6.0946	6.40092	5.30643	4.47815	8.1149	6.19556		4.92526	4.53662	2.72197	5.47621	3.99766	4.02697
Arthur2		2.43065	3.64656	3.72237	3.66049	5.24655	2.49601	3.42676	3.04943	5.58483	15.1187	4.66112	3.70718	13.7849	16.2336	10.1799	11.1993	24.1445	17.8845		12.1563	18.1846	13.5687	15.3245	16.4465	19.0739
BLACKJACK		3.87836	3.56903	3.58582	5.75821	7.50738	2.9	6.89454	5.0808	11.2462	31.6802	8.48222	6.23438	25.8878	23.8794	15.6197	17.9176	25.6861	22.4118		12.2605	14.564	9.95908	16.6548	13.7977	13.7427
Chap1_Mam		1.06106	1.28536	1.08088	2.16659	2.523	1.77688	2.07575	2.48839	3.03754	8.42517	3.48054	3.06215	7.94275	5.75205	6.48374	6.93726	11.854	8.59869		5.6141	4.12296	3.26896	5.78465	4.95205	5.76256
Chap1a_Mam		4.31172	5.65629	4.61527	6.94853	8.02002	4.67319	7.76831	6.21156	14.4459	22.5214	10.4239	7.32388	20.1866	19.0762	17.1777	16.4985	29.8005	23.5073		14.5358	16.9504	12.3792	22.0271	18.3415	17.7974
Charlie1		22.0831	29.5297	26.0022	25.9655	31.6019	18.3008	27.1168	20.35	31.9072	48.1197	31.6428	26.9869	64.5805	72.2719	59.2252	54.4505	94.1643	75.8551		48.9401	58.1691	43.0937	80.3671	61.2548	58.6928
Charlie10		7.16286	13.1336	12.8878	11.5225	17.2329	8.063	12.3072	10.2316	17.0829	26.7651	15.1015	11.2445	29.3547	43.0548	28.489	22.0037	39.516	34.7126		20.0552	26.8573	27.3924	36.5265	31.4279	28.8648
Charlie10a		1.22239	1.26275	0.685318	1.94975	1.52701	1.25722	1.55454	1.04293	2.48211	5.2373	1.54544	1.27458	21.6484	12.4078	10.8976	7.91489	10.2492	9.96526		5.52719	4.60265	0.648117	4.36048	4.27433	4.88983
Charlie10b		0.84028	0.717069	0.561465	1.48566	1.66072	1.25722	1.04179	0.882037	1.97138	4.82197	1.35601	0.741231	5.8608	3.76676	3.83288	3.67038	7.47314	5.7824		3.34707	2.82483	0.713114	2.24029	1.84939	2.47577
Charlie11		0	0	0	0	0.55651	0	0.634578	0	0.599485	1.25102	0.696675	0	1.57337	1.74313	1.1266	1.03038	1.88818	1.6088		0.780733	1.08775	0.863236	1.08199	0.794337	0.931008
Charlie12		2.49574	5.12075	5.38882	3.54795	5.14152	2.22948	7.39292	5.92634	3.31796	4.11988	3.94059	2.83386	4.04469	6.04562	4.04839	5.45628	6.19061	6.13825		3.984	7.55216	6.44691	6.06386	6.12283	4.64451
Charlie13a		2.6454	4.10119	3.57728	4.80342	5.26656	2.36358	3.51738	2.67239	6.08553	12.9528	4.81106	4.18773	16.0596	13.0254	12.1421	12.3992	21.6151	16.1574		9.7933	10.6879	6.61272	10.3187	8.45962	10.78
Charlie13b		1.20122	1.43363	0.928911	2.07003	2.16731	1.55896	1.35014	1.13068	2.96303	7.04386	2.37656	1.94921	10.8297	8.79576	6.97851	5.88973	9.81058	8.91335		4.06116	4.5249	2.47398	4.12277	3.18166	4.63751
Charlie14a		0.590388	0.723353	0.576343	0.838563	0.96416	0.553179	1.7689	0.714422	3.54175	3.71113	1.43783	0.683972	8.94709	9.46158	7.05249	6.22471	8.56347	8.3322		3.65108	3.66633	3.03543	9.11151	4.27959	3.52259
Charlie15a		16.2754	30.0352	24.1702	31.447	36.0818	25.9565	31.8363	32.2784	35.3801	73.1402	38.9988	36.0937	111.737	88.9299	94.4185	94.2558	127.162	107.12		85.9207	72.2115	66.149	60.1513	64.7744	71.6759
Charlie15b		8.59083	11.5696	9.71631	13.9363	21.2126	22.8366	29.7237	20.6767	33.5028	40.3418	34.8614	31.3562	43.873	39.0993	32.0335	30.7025	48.9769	42.3171		29.1535	32.4637	27.019	36.4089	33.3713	30.3672
Charlie16		5.03133	8.33845	6.26167	6.681	8.67642	4.89479	7.4594	6.9979	9.84134	26.1419	8.71066	6.98127	34.9271	32.4608	28.6617	28.6653	42.8137	37.0854		26.7233	26.8806	27.6684	29.9935	30.9572	33.0241
Charlie16a		5.83857	6.44716	5.47281	7.23541	8.38187	6.85204	11.6375	10.823	13.5787	29.7209	14.5024	12.8584	35.3704	38.948	34.4424	37.1619	55.2312	51.1791		48.5978	36.9342	40.6883	30.8138	38.1279	39.8367
Charlie17		7.62622	10.3837	8.92349	8.19312	9.99071	3.26878	4.79036	4.0927	5.98665	10.4517	5.01355	4.16278	35.6124	36.9333	31.0516	30.0392	43.2906	43.8379		28.6585	25.5528	15.7725	15.7263	16.1493	15.786
Charlie17a		5.56253	4.40405	3.12219	6.92758	7.24222	4.60982	5.97341	7.35461	10.4426	25.1151	13.9084	10.4034	24.1598	19.1909	17.8406	16.3544	30.8706	24.9848		18.3475	22.2055	19.9762	21.4752	19.9464	21.6747
Charlie17b		3.54894	5.73971	4.98696	4.47075	6.11347	4.03988	4.27033	5.26203	4.74335	13.1654	5.7249	6.4378	6.08755	7.66559	7.34222	7.87529	11.5933	8.67632		7.56536	6.68674	5.45644	8.3709	8.18463	9.16583
Charlie18a		10.7146	20.0734	16.9407	15.5462	20.7666	11.9523	18.8417	17.7274	30.9815	36.9924	22.5695	18.7534	71.4417	67.0136	56.3309	53.9378	82.5408	71.0933		45.5535	71.3303	47.5232	84.5489	62.6461	58.9735
Charlie19a		7.21761	10.317	7.92269	9.76247	11.8888	7.22485	13.5159	10.3951	16.2935	30.4849	12.7513	11.9507	39.9764	43.8552	38.6624	34.3411	52.3809	47.6688		50.326	72.5403	44.7453	38.5541	37.9993	64.409
Charlie1a		33.2711	44.5748	34.8295	50.1218	55.6051	36.4914	53.8078	34.3329	82.8606	132.402	59.8403	47.5997	206.142	168.002	131.153	115.811	228.144	182.341		90.6076	101.684	72.7378	128.766	96.3743	103.797
Charlie1b		11.0051	13.3549	10.0685	15.4541	15.7488	9.10264	15.0777	9.34378	21.7754	35.5716	15.1617	12.9391	71.1423	74.8456	60.3702	53.036	87.1923	73.2891		49.0662	54.7867	35.2619	52.2367	41.8136	44.3041
Charlie20a		5.63961	4.83534	4.83751	5.69112	6.40221	2.63179	5.69303	4.03546	9.34063	16.1438	7.24983	5.66793	16.5865	13.1642	10.5191	9.42099	17.4376	14.2252		7.23899	6.56656	4.47195	10.6174	7.63121	7.9424
Charlie21a		2.13224	2.94415	2.06555	3.84255	3.8256	1.82683	3.53285	2.85355	5.84473	11.1042	4.69819	4.14282	11.1495	14.5621	9.34251	8.72634	17.9538	14.6458		8.83181	11.1034	6.98775	10.5192	8.62416	10.2364
Charlie22a		2.98005	4.62756	3.47327	5.24405	6.32689	4.35838	4.55496	4.30514	7.42799	16.3668	6.52979	5.45718	25.0216	21.0264	22.3472	20.7469	35.8642	28.7825		17.6487	14.8164	10.6559	16.7595	14.3871	17.5143
Charlie23a		2.67033	3.89668	3.22044	5.07215	6.50877	3.25806	5.64743	5.05716	10.8408	21.2313	7.25361	5.53141	21.009	21.6242	16.3658	15.2566	30.0572	24.1224		14.6623	17.7516	13.9109	19.9423	17.4979	16.338
Charlie24		4.59301	6.39026	4.89592	7.85021	8.44573	6.34848	5.81269	5.49309	9.59208	21.1019	6.84269	6.08952	28.1278	23.6699	21.9241	20.2555	36.116	25.9142		17.7051	15.4315	9.40259	14.873	12.641	14.0955
Charlie25		3.65378	3.32241	3.00495	4.12483	4.65815	1.92774	3.6512	3.06208	7.34178	20.3298	5.76214	3.27262	11.8993	10.388	7.94098	6.32649	15.5699	11.191		5.92608	6.15618	4.33697	7.3864	5.24532	5.79324
Charlie26a		1.03909	2.00301	1.53262	1.61811	1.7762	0.553179	1.40246	1.27098	3.13545	5.49636	2.48485	1.86589	7.24251	5.92283	5.52294	5.25514	9.68404	7.62989		4.5479	4.55089	2.49179	4.7309	3.54244	4.56856
Charlie29a		3.68155	4.95314	3.97818	4.91675	6.67969	4.2578	6.34942	4.63819	9.29761	18.1528	6.27499	4.54586	20.5077	20.2437	15.3106	13.7359	27.63	21.7326		12.4857	13.5629	6.97659	12.7772	9.39872	10.2095
Charlie29b		3.49303	4.29052	3.29516	4.59996	5.6888	4.29367	4.86191	3.45821	9.13094	16.0712	5.159	4.85986	27.3215	26.7644	24.8494	24.5151	31.4549	30.4896		23.1624	34.5403	27.9359	24.3605	32.6515	30.9243
Charlie2a		23.12	24.1946	20.5867	17.1614	23.0342	10.7853	16.7036	13.5094	19.9233	41.3561	16.4316	13.0085	54.686	55.7497	46.1259	42.5046	62.831	53.6498		28.5429	27.1061	21.5345	31.1168	25.6396	26.3711
Charlie2b		16.6994	20.7226	18.0833	15.2683	20.4397	11.7576	16.1569	14.8889	23.3503	48.4693	19.8378	15.9755	69.982	75.0797	59.479	51.0501	90.1458	74.9504		44.7311	49.2742	39.6232	59.6527	51.5597	48.6753
Charlie3		2.41362	2.37366	2.13068	4.09255	4.33069	3.63757	4.15607	2.43916	5.55652	22.6341	4.41565	3.84244	9.43065	5.43717	5.36204	4.57975	11.1917	7.59091		5.15696	5.15239	3.47797	5.23948	4.16913	5.06083
Charlie30a		1.39236	1.51261	0.897557	2.52363	2.67389	1.62601	4.76631	3.28546	15.1154	7.45539	6.57135	6.43357	10.2162	9.20336	6.4131	6.93396	15.9443	10.2719		8.8277	9.93869	12.7646	55.2066	19.4102	13.3047
Charlie30b		3.03302	3.1108	2.57197	3.36454	4.64403	2.00586	3.25722	3.02581	5.3331	8.20235	3.9226	3.60447	25.505	19.8822	16.8295	15.9637	24.6707	20.4151		12.7757	11.0709	7.64115	11.2981	9.44967	10.4304
Charlie31a		1.9124	2.30565	1.88356	3.40071	4.28917	2.29653	3.23838	3.27198	5.30242	15.4073	4.6393	4.13275	5.92144	5.19782	4.56372	4.79878	11.466	9.28639		8.21335	7.11471	4.67801	7.20864	8.11346	9.49788
Charlie32a		0.880706	1.58414	0.94279	1.0796	0.822119	0.586705	0.508509	0.700529	1.17786	3.06856	1.40122	1.05846	3.02217	2.75224	2.62477	1.93669	4.42698	4.09908		1.59541	1.84638	0.664927	1.64207	1.55625	1.78048
Charlie4		2.03112	4.17184	3.59116	5.50939	5.77831	3.69322	5.17967	3.52338	4.66573	12.0827	5.39109	4.44774	18.6087	21.3768	18.7055	17.8134	24.8223	20.8318		16.023	15.5685	17.0013	30.925	23.0337	19.7504
Charlie4a		11.0426	13.4895	9.51246	15.0717	16.8584	10.4209	16.5172	13.8437	32.4288	49.8255	20.4306	19.3251	70.3132	74.5015	56.7249	49.2431	81.3873	70.8624		48.8332	60.4502	55.6304	108.802	75.5874	59.9392
Charlie4z		34.9426	46.7797	38.4314	47.3015	52.6625	28.9041	37.0483	35.1105	51.0076	96.0701	48.0376	44.8737	229.536	170.201	162.996	160.253	240.9	188.522		136.498	109.169	82.7742	110.235	96.9585	117.135
Charlie5		18.1987	33.2426	30.0525	27.2852	36.6666	37.6524	57.8127	67.0541	94.7524	96.9437	123.009	96.9935	49.633	78.3847	59.9944	48.2268	88.457	66.312		42.2309	47.9733	37.1266	50.3811	42.681	43.8585
Charlie6		0.701705	1.25631	1.02853	3.12048	2.62909	1.55896	1.22942	0.814239	1.95944	5.84025	1.53342	0.841285	4.44838	4.7017	3.01581	3.61054	7.65204	7.55523		2.54339	2.36249	2.25525	2.10767	1.99389	2.43745
Charlie7		10.9872	12.6954	10.4689	16.1974	21.8391	12.1532	16.2246	12.6597	28.0825	54.3516	20.7142	14.9167	61.3456	63.6769	59.3168	64.9839	110.502	88.0926		63.5963	66.1769	50.3098	72.545	65.0186	69.9804
Charlie7a		2.62239	2.97394	2.54785	3.52502	3.69242	1.27399	3.69604	2.62796	8.03649	13.5798	5.51348	4.12781	20.9926	29.6892	22.8996	21.1306	33.394	29.3224		26.4061	28.4025	40.1459	34.2973	27.911	30.9883
Charlie7b_Mars		0	0	0	0	0	0	0	0	0.60031	0.656141	0	0	0	0.651593	0	0.627904	1.23913	0.611494		0	0.485457	0	0.474712	0	0.431868
Charlie8		24.8957	32.4511	27.24	36.9388	41.573	26.3518	34.2273	28.7643	50.3637	96.4823	39.2713	34.6762	126.817	128.294	112.04	101.354	160.726	140.647		97.0558	94.5674	75.1903	113.96	89.9283	94.5687
Charlie9		6.1192	3.7178	2.94809	5.12096	5.24773	5.73294	12.0236	5.07822	13.9968	12.7306	8.84136	6.6101	28.6047	26.4321	22.2129	18.5315	29.2758	22.9506		16.9194	15.7931	12.6604	16.0761	14.0102	16.3995
Cheshire		18.0153	47.8161	39.5373	26.5766	53.9487	32.0337	35.8537	34.122	27.5972	52.936	38.9037	30.0321	48.2129	46.9926	37.3039	46.4144	79.6188	74.7351		39.3182	46.4102	26.2776	38.1118	39.5544	44.6365
Chompy-6_Croc		0	0	0	0	0	0	0	0	0	0	0	0	0	0	0	0	0	0		0	0	0	0	0	0
Chompy-7_Croc		0	0	0	0	0	0	0	0	0	0	0	0	0	0	0	0	0	0		0	0	0	0	0	0
CR1-1_Amn		0	0	0	0	0	0	0	0	0	0.469311	0	0	0.94136	0	0.432427	0.560577	0.621463	0		0	0	0	0	0	0
CR1-11_Crp		0	0	0	0	0	0	0	0	0	0	0	0	0	0	0	0	0	0		0	0	0	0	0	0
CR1-12_AMi		1.54045	2.03104	2.13007	2.03973	2.36444	1.59248	1.81767	1.05156	2.73486	2.71431	1.74071	1.06157	2.00649	3.88556	3.56995	2.81629	5.80858	4.14124		2.67444	4.442	2.74561	3.09137	3.2723	2.88415
CR1-13_AMi		0	0	0	0	0	0	0	0	0	1.12848	0	0	0.641529	1.31335	0.606154	0	1.19228	2.25789		0	0.455657	0	0	0	0.452325
CR1-16_AMi		0.84957	0.848275	0.560375	0.76468	1.18656	0.519653	1.01435	0.94438	1.91587	5.70785	1.27376	1.09318	3.57324	2.90659	1.96509	2.49699	5.73352	3.71487		2.96829	1.75197	1.64166	3.1269	1.88427	2.1692
CR1-3_Croc		1.33331	2.92983	2.21322	4.18298	4.79761	2.98951	3.79278	4.97772	9.09576	16.7188	6.0776	5.18248	15.1721	10.8158	10.1473	9.53163	19.999	14.0284		10.1773	9.91848	5.75123	12.6744	9.6335	10.8606
CR1-8_Crp		0	0	0	0	0	0	0	0	0	0	0	0	0	0	0	0	0.524235	0		0	0	0	0	0	0
CR1-L3A_Croc		1.20297	1.9502	1.65855	1.83354	2.6642	1.15665	2.16697	1.26132	2.90541	6.02233	1.87079	1.92187	7.24087	4.86122	4.88855	6.05396	9.27808	7.10149		5.4182	4.28814	3.99146	5.01329	4.05826	5.14005
CR1-L3B_Croc		0	0	0	0	0	0	0	0	0	0	0	0	0.602346	0	0	0.824424	0.694926	0.600136		0.419065	0	0	0	0	0
CR1_Mam		9.07732	6.55819	5.13221	10.1879	9.93176	6.18554	6.82491	6.41587	16.8741	29.9346	10.7206	8.26175	45.5756	31.7274	28.9505	28.3887	51.1003	40.2697		25.1268	28.0906	19.7975	29.553	24.1255	26.8974
CRP1		0	0	0	0	0	0	0	0	0	0	0	0	0	0	0	0	0	0		0	0	0	0	0	0
DNA1_Mam		0	0	0	0	0	0	0	0	0	1.49126	0.69609	0.475834	3.30124	2.99525	2.3088	1.3319	3.84293	3.08365		1.08449	1.41148	0.852039	2.16895	1.72719	1.45126
ERV24_Prim-int		1.17611	1.29811	1.09906	1.77822	2.25276	2.39711	1.98979	1.37098	2.81141	14.516	3.02983	3.03283	6.87425	9.67201	9.92789	10.1557	19.8835	14.7938		8.00212	5.5534	4.02919	4.85513	4.44199	6.31537
ERV24B_Prim-int		1.29867	1.74856	1.36865	2.43942	2.2846	3.8052	2.14445	2.27022	3.68007	13.8445	3.44064	4.01899	4.93338	3.95341	4.60915	4.30096	9.09517	7.06192		5.27845	5.94857	4.24036	7.93865	4.71358	6.2272
ERV3-16A3_I-int		21.8421	26.627	23.2897	34.4058	44.5737	30.689	37.8598	37.5349	46.9503	300.468	46.0411	44.9859	62.0086	50.8356	51.3786	58.3911	100.942	77.9476		70.3458	57.8404	38.5946	54.063	48.0134	60.4911
ERV3-16A3_LTR		1.75249	2.32774	1.8111	4.0661	4.02255	4.14046	4.20591	4.38679	5.37578	22.544	4.48082	3.43271	7.55559	5.07314	5.00088	4.82282	10.656	8.60076		7.85616	6.48519	4.39371	5.69758	4.06055	5.39486
ERVL-B4-int		45.8537	63.9785	46.3503	64.6202	82.97	37.7439	49.4094	54.5873	49.5	211.757	58.5066	59.3658	113.804	93.3849	92.4444	108.674	167.201	121.956		97.5768	80.2413	51.0097	68.9138	63.9565	79.4369
ERVL-E-int		33.4591	57.1065	44.886	68.9552	84.2804	43.8916	50.7351	44.0114	65.2913	283.44	59.0782	56.574	133.576	113.947	112.81	133.073	247.704	181.036		124.156	95.8651	64.5435	83.2395	75.687	97.694
ERVL-int		4.99656	5.6763	4.77325	6.1847	9.28098	3.8052	4.86246	7.40294	8.37829	34.2406	8.82612	6.25927	23.8762	13.5548	17.2407	20.7926	35.2844	32.372		21.4021	18.2684	21.1917	22.1219	20.8346	25.6966
ERVL47-int		0.82447	1.07068	0.775835	1.78015	1.35565	0.519653	0	0.840714	1.18027	9.31033	1.16218	1.38713	8.55046	6.49861	5.96981	7.31985	10.5317	8.54291		3.90477	4.06201	1.56383	2.07187	2.27172	3.5523
Eulor1		0	0	0	0	0	0	0	0	0.497762	0.562497	0	0	0.737845	0.584579	0	0	0.674529	0.620195		0	0	0	0.593741	0	0.411986
Eulor10		0	0	0	0	0	0	0	0	0.466761	0.470482	0	0	0	0	0	0	0.404146	0		0	0	0	0	0	0
Eulor11		0	0	0	0	0	0	0	0	0	1.67391	0	0	0	0	0	0	0	0		0	0	0	0	0	0
Eulor12		0	0	0	0	0	0	0	0	0	1.07021	0	0	0.498738	0	0	0	0	0		0	0	0	0	0	0
Eulor2A		0	0	0	0	0	0	0	0	0.551081	0.982015	0	0	0	0	0	0	0	0		0	0	0	0	0	0
Eulor2B		0	0	0	0	0	0	0	0	0.559752	1.04688	0	0	1.74424	2.2082	1.35668	0.836726	1.52028	1.09332		0.910307	1.03631	0	1.60372	0.965028	0.755488
Eulor2C		0	0	0	0	0	0	0	0	0	0.533919	0	0	0	0	0	0	0.636268	0.629562		0	0	0	0	0	0
Eulor3		0	0	0	0	0	0	0	0	0	0	0	0	0	0	0	0	0	0		0	0	0	0	0	0
Eulor5A		0.453198	0	0	0	0.464975	0	0.575526	0.451163	0.709614	1.39905	0.67614	0.622209	2.01703	0.783956	0.827523	0.871772	1.01255	1.34947		0.551556	0.968291	0.687917	0.785649	0.472044	0.756507
Eulor5B		0	0	0	0	0	0	0	0	0	0	0	0	0	0	0	0	0	0		0	0	0	0	0	0
Eulor6A		0	0	0	0	0	0	0	0	0	0	0	0	0	0	0	0	0.43687	0		0	0	0	0	0	0
Eulor6B		0	0	0	0	0	0	0	0	0	0.705676	0	0	0.41171	0	0	0	0.474995	0		0	0	0	0.430891	0	0
Eulor6C		0	0	0	0	0	0	0	0	0	0	0	0	0	0	0	0	0	0		0	0	0	0	0	0
Eulor6D		0	0	0	0	0	0	0	0	0.814126	0.670103	0	0	0.468798	0	0	0.473408	0.991813	0.49225		0	0.440137	0.443116	0.516948	0	0.466823
Eulor6E		0	0	0	0	0	0	0	0	0	0	0	0	0.516451	0	0	0	0	0		0	0	0	0	0	0
Eulor7		0	0	0	0	0	0	0	0	0	0	0	0	0	0	0	0	0	0		0	0	0	0	0	0
Eulor8		0	0	0	0	0	0.419075	0	0	0.763602	3.13181	0.430718	0	0	0	0	0	0.65992	0		0	0.443727	0.543394	0.959861	0.52234	0.481978
Eulor9A		0	0	0	0	0	0	0	0	0	0.90551	0	0	0.783742	0.597223	0.465417	0.597217	1.72402	0.711604		0.427013	0	0	0.509123	0	0.410858
Eulor9B		0	0	0	0	0	0	0	0	0	0	0	0	0	0	0	0	0	0		0	0	0	0	0	0
Eulor9C		0	0	0	0	0	0	0	0	0	1.07065	0	0	0.975117	0.574066	0.400373	0.44099	1.46242	0.634333		0.402566	0	0	0.453252	0	0
EuthAT-2		2.77396	5.01977	4.41548	6.3731	8.53193	7.2919	8.85117	6.5565	10.9463	19.5462	10.4951	7.87567	15.641	19.7553	14.7172	14.1898	28.9242	21.7411		14.4354	19.0815	13.7652	18.1763	16.4025	16.2325
EuthAT-N1		0	0	0	0	0	0	0	0	0	0.950562	0	0	0.861052	0.697123	0.467024	0	0.868476	0.641338		0.656195	0	0	0	0	0
EuthAT-N1a		0	0	0	0	0	0.620231	0	0	0.497932	1.66057	0.57801	0.441461	0.891028	1.0749	1.19443	2.07859	1.97639	1.4931		1.48348	0.674321	0	0.725002	0.643238	1.36102
Eutr10		2.6941	4.86723	3.39489	4.16143	4.5934	2.53121	3.38832	3.66583	7.03946	20.4372	6.5937	4.74399	10.0676	6.95357	7.37364	9.37536	18.7781	11.7819		7.27748	5.1714	2.77557	5.89998	4.79229	6.80877
Eutr11		2.97512	4.77742	4.24578	4.85598	5.23882	2.06185	6.29299	4.59313	8.06935	11.5262	7.23721	6.76816	14.3274	19.007	15.9122	14.7045	21.796	20.3679		10.3101	11.0013	9.99597	13.7231	12.3121	13.185
Eutr15		0	0.643424	0.565444	0.546351	0.820867	0.553179	0.923826	0.859107	2.09574	5.18018	1.08669	0.90832	2.65383	2.70922	1.68758	2.19234	3.45751	2.73711		2.1751	2.88972	1.61237	3.82743	2.1982	2.6989
Eutr16		1.25539	1.85522	1.46156	1.70542	2.02837	1.82717	1.31681	2.02795	2.33727	10.5447	2.02357	1.92447	4.57446	3.2269	3.41276	2.97365	6.47776	4.12743		2.59835	2.87444	2.7064	3.24438	2.53411	3.08096
Eutr18		1.79179	3.85706	2.38496	5.40627	5.0147	3.63757	4.088	3.54948	6.74417	13.1699	5.11826	5.34351	14.6993	8.65161	8.2328	8.57083	13.9474	11.6064		10.1714	8.17633	4.53715	7.97894	6.51792	8.34918
Eutr2		0.545262	0	0	0.592507	0.78509	0.486127	0	0.497711	1.56018	2.37896	0.660202	0.514985	1.85078	2.41945	1.70523	1.98439	3.79003	3.34925		1.56282	1.75063	0.517022	1.60598	0.973508	1.35023
Eutr2B		0.479768	0.767674	0	1.46855	1.10798	0.78719	1.40559	1.22477	1.95136	4.25681	2.07455	1.30873	8.15102	6.15674	5.34922	4.81108	8.33154	7.71654		3.69803	4.99843	2.68176	4.15594	3.9362	4.29549
Eutr5		1.05729	1.59349	1.68071	2.87062	1.45112	0.787861	1.78642	1.80537	2.99967	6.17961	1.79924	1.89566	2.91773	4.03618	4.06704	4.90135	6.04088	3.96019		3.36627	4.27368	2.55334	4.13581	4.03276	3.12575
EUTREP15		0	0	0	0.484358	0	0	0	0	0.46385	3.051	0.623134	0.55805	0	0	0	0.470507	0.512611	0.601097		0.599797	0.817392	0.804292	2.12178	1.165	0.98013
EUTREP16		1.6687	1.55203	1.18468	1.35038	1.44484	0.754335	1.86434	1.93421	3.04393	5.59959	2.3176	2.05053	4.28069	2.42895	3.08245	4.19946	8.49192	5.29136		4.29102	2.74185	3.05366	3.35698	2.39897	3.44029
EUTREP4		0.461118	0.642145	0.683256	0.778227	1.19743	1.12312	2.215	2.56228	1.69305	3.49849	2.25921	1.68428	2.0538	2.47137	1.97416	2.36004	4.89277	3.40502		3.27916	3.01776	3.32398	4.21251	2.96281	3.01411
EUTREP7		0	0.811944	0.632444	1.10448	0.93412	0	0.650548	0.583481	1.94962	3.24082	0.881713	0.93324	2.11618	1.75166	1.92134	1.8374	3.71239	2.42804		1.08873	1.38625	1.20688	2.21014	1.55917	1.55987
EUTREP8		1.03613	1.15017	0.925343	2.19347	1.82068	1.69306	2.05546	1.5002	2.64483	3.24834	1.92663	1.83954	4.54688	4.93234	4.04803	5.91067	6.90629	5.58546		5.01902	6.00888	4.14646	4.80691	4.14737	5.10943
EutTc1-N1		0	0	0	0	0	0	0	0	0.600315	0.77196	0	0	4.45413	4.05262	2.45904	2.39441	3.31974	3.01353		3.2654	3.22157	1.27946	2.16546	2.69356	2.61806
EutTc1-N2		0	0	0	0.669026	0.650724	0.419075	0.700967	0.587004	0.772088	1.564	1.00337	0.72172	2.9322	3.05194	2.08946	1.76124	3.48528	3.20116		1.92186	3.4156	2.37968	1.98839	2.14414	2.02081
FAM		30.0275	37.2244	28.6908	50.2564	44.1705	24.8481	34.4294	27.2072	47.8888	74.249	37.6966	30.1552	121.588	108.005	109.299	94.235	160.09	121.185		166.458	93.479	101.481	97.2994	102.935	107.776
FLAM_A		67.1753	65.2167	58.2519	99.5867	103.537	58.6732	89.8916	59.1709	120.621	185.478	88.0319	70.3359	365.544	331.332	296.484	267.65	418.876	352.578		438.353	522.868	383.229	397.853	323.518	360.492
FLAM_C		108.389	129.727	101.27	178.523	174.086	112.194	174.525	106.87	220.802	303.776	160.361	123.966	615.314	564.32	504.24	441.602	725.956	567.932		419.18	339.897	286.58	358.861	296.182	320.208
FordPrefect		2.65977	2.69068	2.2164	3.59548	3.66218	1.45838	3.61095	2.53774	3.6274	23.8714	3.43319	2.97238	7.32124	6.81104	6.18119	6.95183	10.6766	8.84078		6.65886	6.21065	4.23521	6.12326	5.32879	6.59129
FordPrefect_a		0.683463	0.988944	0.851706	1.44715	0.946116	1.12312	0.900121	0.751519	1.48925	5.19179	0.917941	0.750113	1.95671	2.06647	2.33559	1.49028	3.95053	2.74938		1.76866	1.36743	0.633921	1.28975	0.990119	1.14966
FRAM		78.472	98.6966	79.8936	158.938	144.448	102.308	144.543	97.6742	176.258	312.073	139.701	119.558	443.834	404.342	388.874	327.501	576.977	469.042		351.288	270.174	259.766	471.254	319.134	318.268
HAL1		186.586	155.703	130.719	195.064	234.683	143.403	207.228	147.641	308.604	584.277	253.577	190.389	634.684	509.856	456.662	430.612	800.405	630.034		389.509	383.852	267.861	435.859	348.711	383.711
HAL1b		9.83992	14.5517	12.4496	15.942	23.1125	16.0422	29.0544	26.4789	36.0541	66.3787	27.0241	20.175	66.7731	71.2595	51.1867	59.1675	96.7925	79.9943		60.2267	83.6455	63.1709	73.9925	70.5584	70.2722
HAL1M8		21.4102	33.4174	27.1226	26.4029	32.1758	18.7575	25.7406	25.4369	26.6598	66.6255	31.9185	27.8048	61.4529	48.0458	45.7892	47.3369	87.0216	59.3067		40.669	38.1301	22.6332	38.5873	38.5376	45.8855
HAL1ME		28.1823	30.8448	26.4483	33.1355	44.1594	21.4835	41.7132	31.2628	72.8215	111.521	47.5428	35.4144	114.075	114.59	89.0189	80.8013	157.76	121.744		72.9344	83.3789	57.9778	88.9442	77.794	81.8867
Harlequin-int		20.2513	26.5957	27.0336	35.79	40.5742	42.3728	34.1023	25.1687	41.8538	80.168	33.4967	30.5608	59.3233	63.9096	42.9754	48.7734	72.9409	64.7967		58.3444	74.9395	39.5952	56.1415	54.2254	47.2077
hAT-1_Mam		4.69846	6.90589	5.2188	8.53977	8.64708	4.81098	9.00666	7.11247	14.9475	25.6134	11.4305	8.77227	43.4161	51.241	45.9231	66.1989	88.4653	77.1591		120.568	213.062	207.546	99.0334	176.066	239.203
hAT-16_Crp		0	0	0	0	0	0	0	0	0	0	0	0	0	0	0	0	0.422852	0		0	0	0	0	0	0
hAT-4b_Ther		0.631466	0.968929	0.570452	0.914856	0.931741	0	1.49213	0.858102	1.34729	3.4537	0.86177	0.595723	1.93342	2.336	2.40503	2.09216	5.59112	3.97938		1.92813	1.61044	1.13864	1.75907	1.17826	1.39927
hAT-5_Mam		2.0332	3.72638	2.63962	3.50508	4.08999	1.62601	3.26326	3.23221	6.27229	11.2435	4.86588	3.4311	53.1179	66.3467	53.8947	46.1283	66.8934	60.9411		35.5534	32.7266	35.461	52.1584	41.049	41.3435
hAT-N1_Mam		0	0	0	0	0.499099	0	0.411562	0.499128	0.51297	2.682	0.816653	0.623233	2.14812	1.22532	0.747022	1.11276	2.8121	1.77499		0.630243	0.686044	0	1.19892	0.537988	1.00918
hAT-N1a_Mam		0.678758	0.648787	0.52666	1.05023	1.32653	0.921965	0.996502	1.15311	1.48997	5.42647	2.08208	1.29598	5.81816	4.94589	3.79091	3.67101	8.26962	7.05445		4.04961	4.99815	2.403	5.16399	4.11452	4.89978
HERV-Fc1-int		7.29541	19.2672	17.0326	14.2371	14.2155	2.95599	8.36157	5.61571	7.08486	4.47652	7.58753	4.96437	11.1816	9.76102	16.4809	18.2215	20.2286	18.4849		8.37711	4.04577	3.49752	3.46936	4.77229	4.15278
HERV-Fc1_LTR1		0	0	0	0	0	0	0	0	0	0.635272	0	0	0	0	0	0	0	0		0	0	0	0	0	0
HERV-Fc1_LTR2		0	0	0	0	0	0	0	0	0	0	0	0	0	0	0	0	0	0		0	0	0	0	0	0
HERV-Fc1_LTR3		0	0	0	0	0	0	0	0	0	0	0	0	0	0	0	0	0	0		0	0	0	0	0	0
HERV-Fc2-int		0.526126	0.698429	0.663399	0.489729	0.77806	0	0	0	0.437185	1.11683	0.602147	0	0.405579	0.48344	0.865093	0.675203	1.02853	0.631729		0.450951	0	0	0	0	0
HERV-Fc2_LTR		0	0	0	0	0	0	0	0	0	0	0	0	0	0	0	0	0	0		0	0	0	0	0	0
HERV1_I-int		1.61359	3.59785	2.4298	7.06037	6.35118	4.17399	2.05083	2.13815	4.97946	8.55456	2.03188	2.5176	3.69091	8.01825	10.3578	9.40206	56.4962	23.7301		8.35358	3.48262	2.76564	4.15278	2.96459	3.6749
HERV1_LTRa		0.887143	0.662387	0.659306	0.420405	0.533705	0	0.566292	0.470932	0.704088	1.18622	0	0	2.07408	2.04627	1.79237	1.82054	1.68693	2.06007		0.933198	0.596704	0	1.43699	1.13707	0.826267
HERV1_LTRb		0	0	0	0	0	0	0	0	0	0	0	0	0.597104	0.627536	0	0.545966	0.625044	0.43051		0	0.441913	0.71099	0.523783	0.764151	0.791883
HERV1_LTRc		0	0	0.411502	0.714243	0.955087	0.419075	0.834033	0	1.11018	0.671912	0.772623	0.694648	0.517652	1.27001	0.82155	1.25773	1.54524	1.65374		1.27304	1.26539	1.74666	2.01854	1.77019	1.33984
HERV1_LTRd		0	0	0	0	0.44748	0	0	0	0.564831	0.690337	0.415491	0.453844	0.587889	0	0	0	0	0		0	0	0	0	0	0
HERV1_LTRe		0	0	0	0	0	0	0	0	0	0	0	0	0	0	0	0	0	0		0	0	0.436888	0	0	0
HERV15-int		2.69485	1.04575	0.834028	1.6272	2.16224	1.276	2.36288	1.65828	2.83692	11.1582	2.28055	1.83803	2.78047	2.94243	2.22758	3.13669	3.9197	4.64973		3.06507	4.05368	1.89532	3.03383	5.015	3.98183
HERV16-int		9.60509	12.6085	10.3168	13.7195	16.0894	8.85086	11.5331	9.13309	16.5064	70.6975	12.2356	12.083	31.0752	25.3716	29.44	27.9965	38.9016	36.9985		22.8807	17.5674	11.5188	16.9707	13.9539	21.2366
HERV17-int		9.29465	9.87742	6.61859	14.2741	12.1159	10.3424	14.2267	9.15814	21.8216	84.3023	15.9622	13.2608	37.2283	25.5883	22.0229	19.6214	35.9875	31.3639		18.3441	14.6655	10.7227	15.5099	11.4281	15.3727
HERV3-int		9.19152	9.15677	6.7271	11.8457	12.0244	7.94566	7.74483	6.10787	7.92177	31.0263	8.90511	8.25593	29.2431	27.6056	21.2186	18.2352	19.9831	25.5626		11.6815	9.15433	5.77629	9.02569	7.31318	8.15755
HERV30-int		0.437405	0.62409	0.605786	1.44104	0.968009	0.787861	1.13077	0.858859	2.87387	9.0609	1.29964	0.970002	1.1154	0.616767	0.657779	1.21443	2.98695	1.96906		1.50643	1.04815	0.660697	0.627771	0.669841	1.14865
HERV35I-int		2.48814	2.33433	2.53264	3.56498	5.09524	3.28555	3.29438	1.81305	4.58094	16.2771	2.87742	2.07759	8.74971	10.5203	8.29763	6.61817	13.066	12.8788		5.30203	3.98207	2.32783	7.24616	3.41317	3.39161
HERV4_I-int		9.19643	9.46906	7.63658	14.2801	13.7999	10.2791	9.19146	7.41106	15.1226	31.9012	12.1426	13.0595	20.8094	29.3892	22.4131	16.5241	35.7505	29.0042		15.0248	13.5715	9.07474	11.5205	10.7282	13.431
HERV9-int		4.54186	4.25101	4.55591	8.20133	8.11695	5.20659	7.65719	7.82984	14.6508	66.4018	11.1227	9.70938	14.6196	7.64962	8.10393	9.39541	20.7006	12.6952		9.02396	7.38508	4.38822	10.5136	5.73419	7.79943
HERV9N-int		3.95491	4.50818	3.17116	6.15671	5.9348	4.16493	5.07552	4.49768	5.47219	37.4003	5.33336	5.89477	12.9015	8.00874	6.56653	8.5105	10.4692	9.75699		10.0367	4.72184	4.10619	4.82442	4.47322	5.68418
HERV9NC-int		4.55209	3.35282	2.54911	7.2217	6.0571	6.42492	7.00538	4.03589	11.604	60.8426	7.71371	6.91502	15.4544	6.18077	7.19907	6.53261	15.8668	11.5076		8.14834	7.15859	2.97396	6.80258	4.61887	8.25065
HERVE-int		12.9807	12.6217	10.3939	18.2046	16.1202	18.1694	19.5242	33.2543	26.7738	72.4031	31.1538	34.653	53.2797	60.1033	46.6498	59.0329	68.6677	66.7012		53.8504	54.7575	44.8277	43.4013	56.544	65.2973
HERVE_a-int		16.2326	23.8514	19.7692	22.5046	20.7005	11.6885	11.5782	6.04969	9.78696	31.9547	10.0795	9.59343	18.7211	28.2348	27.3192	25.8754	32.6303	34.6613		20.1121	14.8325	14.3338	17.1081	14.3281	14.4319
HERVFH19-int		0	0.404562	0	1.31069	0.991725	0.687283	1.43334	1.40236	3.06419	10.0769	2.21934	1.84169	1.54349	0.914044	0.918773	1.06501	2.69957	2.11279		1.52072	0.827611	0.992946	1.33384	0.903652	1.14752
HERVFH21-int		2.54746	4.67635	3.48319	5.31222	8.36224	6.2526	6.60789	3.9823	8.1445	16.4963	5.38646	4.66769	12.2751	14.2481	11.4162	9.82654	14.5408	12.5647		12.8163	10.0147	7.20767	8.00447	7.95061	9.45613
HERVH-int		58.1626	117.722	121.966	145.151	295.268	167.574	257.634	195.416	462.75	629.957	298.914	226.506	142.256	154.755	152.015	155.649	249.742	207.494		217.327	176.916	117.213	219.656	180.34	227.915
HERVH48-int		7.57301	10.8334	9.23848	17.0319	18.347	11.7173	18.2991	11.0955	32.4148	34.9419	20.8421	17.2637	32.8994	24.7769	22.4029	21.8481	39.6036	33.5123		21.3398	15.038	10.4947	15.9071	15.5264	21.7202
HERVI-int		2.35842	3.58181	2.27204	4.93779	5.21494	3.28454	3.59423	3.16064	4.99027	13.1178	2.86048	2.33811	9.61308	5.23003	5.45724	4.76714	8.84442	9.00936		5.73854	4.08527	2.31459	4.84776	3.39777	3.7336
HERVIP10B3-int		11.0109	10.9612	8.26898	16.3682	15.5576	9.38661	9.26522	6.91083	13.118	27.8312	11.4467	11.5762	56.756	33.2784	33.3568	33.0397	52.4397	38.1583		26.0684	19.2614	7.99821	12.13	13.5253	15.8177
HERVIP10F-int		6.0731	13.7095	9.75139	15.2263	19.8029	7.53195	9.63555	7.19864	9.79522	35.8229	9.38739	8.86879	31.4172	24.1491	25.7497	25.8937	45.1926	36.8844		24.1635	17.7419	9.36987	12.3484	12.3153	15.5558
HERVIP10FH-int		4.49978	5.05462	3.05354	8.78891	8.17821	7.7321	8.59945	5.81872	15.6154	33.3912	10.3777	8.30938	12.5665	9.22399	9.67958	9.30954	20.6715	15.8441		11.1369	10.522	7.54801	21.3931	14.5816	12.8605
HERVK-int		25.9949	30.1597	28.5233	55.7272	59.8599	47.2777	53.2577	35.643	112.649	92.8452	62.8052	51.4179	70.2304	127.785	87.6579	88.9793	124.968	115.82		105.401	86.658	70.4378	109.09	105.108	114.725
HERVK11-int		6.67222	13.3302	10.0764	12.5311	16.1447	16.0814	16.3135	8.40942	21.7733	43.517	15.8366	15.3238	24.6701	34.4441	27.5685	27.5527	37.5577	31.1422		28.5821	23.8399	22.1445	45.1983	31.6579	30.3672
HERVK11D-int		0.411089	0.629089	0	0.691099	1.27082	0.574971	1.96306	0.864149	1.44271	5.70927	1.47708	1.07642	1.30584	2.05857	1.06039	1.44859	1.13803	1.63958		2.34534	1.67866	0.939518	1.16888	0.722262	1.18624
HERVK13-int		18.0779	14.903	13.1419	23.4758	25.5333	18.1815	7.33566	4.57766	14.67	17.5222	6.71835	10.0677	28.478	28.5294	26.7937	28.8007	26.6531	39.1802		24.0591	11.8633	15.3911	35.1968	16.3279	15.3307
HERVK14-int		8.36874	17.9222	15.1038	22.7307	26.2479	13.6816	14.4835	9.93115	15.9842	32.6675	12.3223	13.1917	33.6283	50.691	39.2147	40.3094	61.2928	51.8622		33.2075	28.4935	19.9093	31.4499	28.1298	25.9334
HERVK14C-int		1.81037	2.15869	2.30035	5.06418	4.61317	4.3557	3.82483	2.15575	3.09434	11.783	4.42314	3.61554	4.87646	6.92398	5.23844	6.49559	6.83958	8.15475		5.50286	3.66626	3.02192	4.4939	4.62239	5.96797
HERVK22-int		5.88806	5.92636	4.64596	8.47206	8.83277	4.34162	7.47475	5.6025	9.27993	36.8093	7.9377	7.45411	19.0293	17.5466	15.1087	20.9752	30.8653	24.2107		18.178	19.0286	12.4289	15.805	16.0231	17.1524
HERVK3-int		16.0933	25.2725	23.3597	35.9678	33.7329	17.8191	22.8933	15.9705	21.7565	42.5782	20.0334	24.0848	64.6533	61.7425	59.5441	74.5167	105.728	91.2258		54.285	47.5615	26.1535	30.0305	31.7219	39.3284
HERVK9-int		26.7647	25.5361	22.5107	35.1502	35.1204	37.5008	38.4138	28.5451	48.5169	106.393	40.0645	40.9136	106.113	95.9675	84.8107	79.3887	107.812	99.0924		70.5298	78.2778	54.6358	76.1679	75.9511	84.4786
HERVKC4-int		0	0	0	0.670311	0.728279	0.848207	0.733261	0	1.37246	3.92345	0.550861	0.804564	0.719795	0	0	0	0.605055	0.49896		0	0	0.446625	0.602565	0	0
HERVL-int		28.9062	29.3612	23.1205	39.3484	42.8194	26.6448	35.6737	45.2229	62.6949	332.943	54.1763	44.9733	86.9924	53.6127	53.6443	56.8827	109.788	83.8575		52.958	62.7077	51.6189	72.7368	49.1544	56.6376
HERVL18-int		2.83384	2.67549	2.38863	4.91029	4.034	3.33584	4.01784	5.41596	5.56546	50.3738	6.7365	6.86334	3.20972	1.55235	2.23483	3.09936	4.78712	3.86073		3.06768	2.59955	2.24178	4.74804	3.89214	7.03528
HERVL32-int		0	0	0	0.418899	0.466864	0	0.425113	0.56331	2.04678	9.08369	0.622057	0	0.748135	0.533765	0.511245	0.867462	2.44753	1.24088		0.954805	0.656284	0.651454	0.753664	0.552469	0.643356
HERVL40-int		13.7882	23.109	17.7651	17.4894	22.5116	9.43757	13.7533	13.4963	14.7683	53.2195	15.5162	15.3074	30.769	26.0702	26.3281	28.9352	51.7212	38.3621		23.6547	19.3009	11.8894	18.4576	17.0046	20.7438
HERVL66-int		3.071	3.82816	4.09365	3.06587	3.82651	2.263	3.80853	2.15431	6.46882	8.92284	3.86841	3.29951	7.2398	7.66092	5.68243	5.42972	8.66525	7.16923		7.03515	4.77664	3.1035	3.15592	2.91702	3.88455
HERVL74-int		7.0296	13.0788	11.1221	9.71095	11.0853	3.83873	5.93513	4.04449	6.7791	13.5852	6.7364	5.47756	23.2146	33.7073	53.0103	83.77	104.907	83.9796		69.4258	53.8443	39.5882	22.6856	41.3161	73.7371
HERVP71A-int		2.06463	3.92208	2.80519	3.43809	3.66963	2.01156	5.03209	8.09955	6.60503	28.297	9.24698	11.4165	11.2897	6.54702	6.66058	8.49397	13.302	9.69716		8.71507	11.9609	6.55033	10.8974	10.4636	14.4877
HERVS71-int		6.65816	13.9194	9.38764	16.8306	21.9883	16.3875	19.32	14.0724	25.1326	42.1697	23.3303	20.1959	17.7056	15.4396	11.8473	14.7944	21.3476	18.4457		16.842	19.6625	17.3252	19.1579	15.5234	16.1716
HSMAR1		9.7997	12.7838	11.9799	13.6457	14.8261	11.6168	15.4207	9.00833	20.2403	42.3116	11.7428	11.7335	32.8179	32.1257	27.8711	27.4513	42.2604	35.1515		27.4112	22.7191	16.7701	29.5588	21.1867	19.5288
HSMAR2		17.1703	20.2999	16.792	23.8447	27.9991	14.7682	17.8772	18.141	26.9798	74.3997	26.2344	23.7847	71.688	57.4878	44.874	51.0289	96.4845	77.8558		38.7822	41.5353	25.9974	36.1503	34.0401	38.7121
HUERS-P1-int		4.55133	7.09979	5.50858	9.88654	10.8524	3.43641	5.56493	6.11876	7.30799	35.4603	7.66547	6.47542	25.2437	19.7741	20.1284	19.9693	29.2743	27.741		15.196	10.2305	7.21448	7.40676	8.14623	10.43
HUERS-P2-int		1.28721	1.40139	1.10324	1.95629	2.40055	1.59248	3.23672	2.54501	4.55156	25.8684	3.28077	2.28587	2.34182	2.95707	2.99583	2.45158	6.08047	4.04312		2.71336	4.0714	4.04946	5.006	3.09134	4.1562
HUERS-P3-int		12.8092	10.3619	8.97271	14.6348	20.6782	13.2763	20.9537	14.8129	17.651	65.3158	21.817	19.718	39.1162	21.3632	22.4868	24.8595	40.7114	30.8275		24.2858	19.8414	11.5215	16.92	14.9359	22.1237
HUERS-P3b-int		9.01548	9.51479	6.88862	12.0111	12.2112	9.11907	15.6881	7.29734	21.4711	33.1523	12.5388	9.96171	36.9775	28.3007	24.2159	29.7914	64.0526	43.0319		25.0563	18.7979	10.9262	18.3621	14.9166	17.4955
Kanga1		2.3121	2.21835	1.78167	2.00126	2.29217	1.96127	1.97783	1.92466	4.93669	10.7093	3.20308	2.56375	13.1902	10.394	8.40174	9.52878	14.8395	13.6521		8.87948	9.70835	7.19137	9.53221	9.37234	11.0932
Kanga11a		3.37346	9.64279	7.21885	7.0946	13.1052	10.0725	14.9146	22.8463	14.3795	28.5257	18.9772	12.6419	9.614	10.9589	10.6303	16.7715	36.2194	24.933		27.6139	30.9458	22.036	14.9849	23.6191	24.2209
Kanga1a		2.41797	2.71105	1.89426	3.30133	4.34532	2.02832	3.94737	2.78375	7.1605	12.9536	5.39814	3.80326	13.151	12.7372	9.71368	8.04697	15.7186	12.9912		7.02491	8.5309	5.62823	7.65095	8.08158	8.86477
Kanga1b		0.764881	0.769323	0.489305	1.26724	0.998999	0.787861	1.03845	0.810757	1.75767	5.79492	1.75767	1.31365	7.00681	4.59618	4.05934	3.25452	7.41037	5.66603		2.46817	3.54442	0.464256	3.39131	2.11452	2.37844
Kanga1c		3.91229	6.30055	5.46926	5.91941	8.42817	4.30809	4.80002	4.05227	5.84266	11.5224	5.12228	4.31299	18.076	14.9791	14.2702	14.1554	26.3123	20.6161		13.722	12.0833	6.88173	9.96103	8.55455	10.9678
Kanga1d		1.36026	1.94736	1.22451	2.09757	2.18077	1.25722	2.0571	1.23244	2.28086	6.71671	2.03054	1.76593	6.12831	6.753	4.02382	3.9419	8.14692	6.81258		3.55985	4.0346	2.20704	4.91763	4.49973	4.05894
Kanga2_a		4.29479	6.1865	4.62534	7.27879	9.60311	5.73261	12.2925	8.03353	15.6322	24.4341	11.4752	8.11031	38.0121	29.4702	26.3555	23.4866	44.108	34.4283		21.8863	29.0225	20.6588	27.7638	24.3647	24.735
L1HS		29.3412	26.5629	17.3579	24.4947	21.4244	36.782	49.7409	47.6453	232.459	122.665	91.2782	37.2714	32.6496	24.7162	26.7146	24.173	62.2224	39.0981		27.4845	27.1808	26.4207	65.993	26.5209	28.236
L1M		0.949876	1.24914	1.08775	1.76934	2.09541	1.19017	2.31339	2.01422	3.22979	3.76678	2.27819	1.98048	6.51289	5.97903	4.87476	4.44953	7.2977	6.47736		5.00503	4.91078	4.21576	5.88727	5.14819	4.96957
L1M1		37.7138	47.4736	37.1406	56.2947	67.925	41.358	53.3555	52.9544	102.239	447.937	88.4996	60.3588	185.193	126.647	115.297	111.206	278.565	183.693		106.568	110.715	74.8793	136.246	106.01	114.009
L1M2		55.2506	96.8114	69.8868	69.2282	89.6351	43.852	57.7326	50.5095	80.4802	262.95	79.9442	60.0994	172.373	126.945	124.02	128.984	235.953	175.144		89.8822	109.545	79.1638	176.92	119.98	115.393
L1M2a		2.14248	3.89694	3.05438	4.69038	6.65191	3.77167	3.09701	3.5554	5.20105	31.2602	5.10544	3.53428	10.2163	5.10325	7.10179	6.44391	18.2283	12.0387		6.74349	4.29456	3.0242	5.50487	3.75887	4.13706
L1M2a1		0	0.419275	0	1.31261	1.0104	0.854913	1.0836	0.677182	1.17977	8.39673	1.2506	0.598999	2.49681	2.07334	2.28773	1.5287	4.15307	3.32084		2.26976	4.44676	8.56189	5.89206	7.46484	13.0177
L1M2b		0.654987	0.977501	0.865369	1.68897	1.50742	0.888439	1.45898	2.60046	3.57189	12.3575	6.11964	3.14558	1.82694	1.48282	1.35128	1.72862	3.53247	3.8035		2.18492	2.23632	4.93332	3.63544	5.25613	5.32349
L1M2c		2.22612	1.85474	1.30812	4.53558	4.15148	3.06226	3.49958	2.99664	7.65191	23.1626	5.02762	3.97956	15.1752	4.7524	5.04696	6.08315	16.4745	10.5723		5.33034	3.30892	2.78949	4.52936	2.97536	4.33425
L1M3		23.147	39.5307	29.4435	41.5438	52.225	31.6784	40.1961	33.6947	57.9882	113.344	49.3007	38.9474	128.769	142.621	110.69	95.8991	200.29	159.798		83.4819	85.6607	58.9508	115.906	83.874	89.2018
L1M3a		19.5363	16.6045	15.1398	13.1428	13.8508	8.74961	9.29545	9.52918	9.21109	31.1156	14.9743	13.9944	48.3701	28.9743	29.7848	26.3826	34.9921	29.2025		14.9299	9.39097	12.9012	13.3972	13.8762	18.6994
L1M3b		4.28169	6.95347	5.58662	7.21678	8.20487	3.63757	5.34854	4.50538	4.04792	26.3637	6.81805	7.56243	8.43725	10.0043	9.79562	8.82808	15.3191	11.1718		6.92933	7.52746	4.37339	6.01142	5.66995	7.2125
L1M3c		2.17331	3.81159	2.62065	4.52847	5.64216	3.4867	4.271	3.63087	7.52818	28.1405	6.0558	4.15727	12.8742	11.764	9.79347	10.1998	24.4068	15.7545		10.3939	8.36447	6.91251	10.8181	8.80095	9.88202
L1M3d		1.23933	2.68192	1.24644	2.01791	3.05062	1.89422	2.53398	3.96932	7.40023	13.1144	4.1525	2.27847	5.9987	3.75268	3.09877	4.12557	7.86438	6.60442		4.02071	3.38123	2.32284	3.29902	3.0535	3.35816
L1M3de		3.25542	7.88793	5.81766	8.63188	11.6797	5.0118	6.92281	7.12713	7.81258	24.254	10.815	8.91487	13.6373	16.4761	14.4227	15.5224	35.455	23.8622		14.3777	10.48	7.11352	11.0321	11.2603	12.4159
L1M3e		1.62237	2.35323	1.85896	4.05989	3.4689	2.34682	3.6284	2.1018	6.55046	30.1999	3.59666	2.90142	8.36925	6.06009	5.10492	5.05592	11.3087	7.8849		4.51099	4.1791	2.39102	7.67397	4.0648	4.61842
L1M3f		1.83701	2.89144	1.53348	4.27853	3.97701	2.7793	3.49746	3.48545	5.98882	28.1498	5.6252	3.92979	17.0028	9.88166	9.07732	9.16114	20.0117	15.427		10.0356	10.402	5.92312	10.8415	8.204	10.1664
L1M4		92.9611	176.781	139.022	158.501	204.232	119.254	155.636	119.741	217.641	445.793	195.664	147.025	468.758	470.949	383.175	382.469	714.642	565.134		296.346	298.718	193.411	305.611	270.952	297.416
L1M4a1		11.0673	12.6658	10.3013	12.6472	15.52	8.65976	14.6802	14.3602	28.9568	53.8953	22.9194	16.021	52.9656	40.6129	34.4592	34.3622	64.9916	45.9829		28.4889	33.6387	21.6163	43.7333	33.9386	33.8105
L1M4a2		5.97425	8.79531	6.97183	10.9185	14.4799	9.90358	13.1826	8.29087	18.2451	46.9659	17.0104	11.5765	28.9186	24.8081	20.5172	19.22	51.8629	35.1045		21.2439	20.6989	12.1471	24.4089	20.0344	20.2267
L1M4b		17.9353	28.89	24.3104	31.9996	40.4152	20.7526	33.6281	30.2796	52.3825	127.034	44.7869	34.9397	88.7134	84.2013	72.2655	87.1361	138.166	110.318		67.3406	71.9254	50.9174	85.9525	71.572	74.3534
L1M4c		19.2941	33.2264	22.2303	28.5	35.5392	25.7366	31.4978	22.7032	39.721	99.0551	38.6844	24.6185	120.374	97.9195	75.7685	65.1947	139.166	114.525		54.8857	51.9264	32.384	57.3228	47.1535	51.6761
L1M5		161.594	254.38	207.613	213.896	308.187	177.903	250.48	192.99	353.225	646.187	306.865	241.1	919.315	1010.48	763.041	688.237	1190.81	1007.95		595.303	682.966	478.89	685.979	609.635	614.379
L1M6		13.4096	14.0012	10.5243	15.7065	19.6709	10.5439	16.5885	20.0779	34.2991	86.0852	27.8685	22.516	67.796	90.2324	73.491	68.088	127.291	94.9818		63.5004	94.175	66.5415	88.9793	92.4863	91.8356
L1M6B		29.8562	34.3411	45.0087	26.5799	40.8645	16.6457	20.01	23.4862	10.658	27.2819	24.2468	21.1277	45.5192	46.0897	46.356	49.4054	59.1612	49.9954		38.8675	33.4041	30.4591	36.7927	37.4911	38.0699
L1M7		7.48418	8.98215	6.95809	11.8909	14.1248	9.05202	14.75	11.5737	25.9327	55.2272	18.8397	12.6216	45.3749	37.0879	32.3725	31.2074	66.3097	46.1424		29.0357	34.0552	26.0883	40.3806	33.849	34.9159
L1M8		5.53196	7.59997	5.04616	8.40931	8.46948	5.63203	8.41615	6.73308	12.5325	31.9258	11.6041	8.76699	28.0959	19.1087	18.6963	17.2275	40.6911	29.5965		16.3808	14.1923	9.36751	17.8266	15.0001	16.1911
L1MA1		27.5299	48.4327	44.1847	47.4155	77.5778	33.3721	53.278	40.2804	61.4386	191.553	60.3719	42.8519	95.1287	105.427	87.6442	96.0141	179.361	129.398		90.1443	84.7223	58.2325	87.8964	69.6675	77.322
L1MA10		13.7965	26.593	17.504	21.5787	26.1612	13.3598	17.8203	12.8806	34.9194	66.2817	23.5452	14.3105	52.0428	53.1333	48.9892	42.5968	82.2694	61.6452		36.604	43.1639	34.7407	51.3164	39.5126	40.0454
L1MA2		31.8801	55.5537	37.4715	67.6805	91.078	36.7495	66.5697	54.4232	100.88	320.118	80.662	52.6018	150.058	117.982	105.634	101.394	243.872	201.222		99.1712	106.687	71.9931	130.559	100.739	105.046
L1MA3		38.9834	61.5693	47.7059	76.1665	95.3371	50.7533	87.4803	61.0928	140.274	406.389	113.026	70.1603	234.312	189.947	153.817	146.628	364.228	247.715		146.36	170.042	107.564	222.792	157.954	153.277
L1MA4		38.4392	63.0794	47.6803	69.9864	92.2194	55.394	77.736	70.858	142.431	297.446	108.395	71.0213	199.057	175.869	152.802	145.288	323.883	245.121		141.311	168.282	125.552	215.501	168.69	171.564
L1MA4A		35.1001	47.1267	34.1342	54.9449	66.0904	39.5992	71.9288	51.2126	96.8891	267.451	85.9475	53.063	144.233	99.324	91.1336	84.5248	213.512	139.514		85.9802	105.854	65.3454	116.57	87.8817	94.9996
L1MA5		30.9254	60.3497	43.3305	64.2006	78.5279	44.7937	60.7939	47.2261	76.7424	172.149	89.0456	60.085	113.644	85.2539	76.6092	78.6345	186.958	130.03		73.6957	79.3859	55.497	94.3127	79.4105	87.905
L1MA5A		20.3913	32.4696	25.9211	25.3319	37.7672	13.8553	26.5685	22.2013	33.8592	91.1415	35.5895	25.7197	83.0103	53.5649	52.1347	54.6251	101.582	78.3309		39.3971	44.4049	27.5445	48.8599	41.8674	50.5204
L1MA6		20.3296	31.2981	25.5525	28.4843	43.6153	26.9187	43.3232	37.8353	54.3502	160.227	52.7193	39.595	86.8153	81.9883	66.5586	66.9049	130.22	94.4662		57.3955	65.3176	44.3833	79.1398	65.4591	73.1675
L1MA7		27.338	41.5644	33.4284	43.6693	60.9642	30.0641	49.9956	42.2851	76.0444	187.966	66.2994	47.302	137.421	134.401	100.058	98.0614	200.612	149.598		89.4315	109.554	70.7261	129.208	100.175	104.345
L1MA8		40.2097	69.1576	54.3139	56.1776	82.5051	43.4493	62.4006	50.1522	104.178	255.289	79.5059	60.2939	219.583	220.161	161.729	140.325	298.103	238.365		117.431	142.112	86.7513	151.448	120.438	127.017
L1MA9		65.2147	98.7632	78.5931	96.7777	141.273	62.4512	100.449	84.7834	162.887	382.587	129.283	95.1467	249.491	280.116	201.893	204.045	422.527	320.887		190.167	235.948	143.126	315.088	237.008	226.214
L1MB1		24.6687	40.3233	29.0064	37.2064	47.3302	24.3399	34.7195	31.4249	58.7774	149.783	51.1201	39.7747	99.7483	78.5053	70.0643	75.3997	152.026	118.305		59.8289	69.0162	40.8773	80.0512	65.4007	68.8116
L1MB2		56.4061	87.7017	67.1182	88.1402	126.979	71.863	90.7364	63.085	109.301	234.509	109.462	81.1267	342.773	315.501	251.107	226.473	416.617	349.24		188.207	191.89	132.437	214.848	183.246	186.182
L1MB3		105.811	143.809	121.959	189.975	231.609	127.088	168.255	132.793	262.29	484.217	213.398	177.537	559.414	499.324	438.542	427.705	824.423	648.517		389.802	393.691	259.657	414.616	368.722	413.437
L1MB4		67.4705	90.6297	71.4374	92.166	122.607	77.3012	111.112	102.763	135.791	294.576	176.725	142.48	271.589	246	211.644	216.339	384.161	303.495		180.933	192.581	129.753	217.021	179.05	193.651
L1MB5		82.7902	154.61	134.479	131.368	177.89	95.9846	142.561	101.246	179.167	314.98	155.714	134.004	341.15	347.535	306.325	304.793	486.758	378.09		268.822	280.405	196.369	278.27	258.63	267.387
L1MB7		149.178	218.533	174.207	238.73	307.162	173.817	264.99	213.111	374.968	701.82	334.555	257.263	835.012	765.439	609.381	582.647	1107.27	882.336		562.847	606.505	407.819	662.943	572.122	599.859
L1MB8		116.564	151.058	127.353	174.157	232.912	126.562	201.45	163.302	265.857	499.952	240.608	192.926	547.456	548.261	423.035	385.741	688.502	572.679		389.401	454.791	324.964	502.245	431.638	425.606
L1MC		21.4873	36.152	29.9397	38.0895	50.9682	30.7936	44.5634	34.6502	56.8669	129.316	54.3646	42.4322	116.273	107.261	84.2469	75.7396	155.663	121.11		65.2316	89.6034	51.9849	85.5576	74.1721	80.9321
L1MC1		100.733	131.109	111.579	154.414	206.058	104.93	161.904	145.253	216.789	501.342	218.64	174.791	315.914	290.286	273.02	275.38	532.386	413.44		251.629	285.479	213.605	303.85	270.443	297.801
L1MC2		44.4411	49.1265	44.6819	51.4837	67.867	38.4687	52.3063	50.1008	78.1763	174.961	66.5399	51.9319	132.858	130.718	105.925	102.398	217.911	158.421		96.5685	116.316	74.7153	124.687	103.059	104.827
L1MC3		69.5898	122.357	101.709	109.002	162.078	67.226	113.358	94.7928	156.083	390.961	134.2	100.609	278.319	243.128	226.893	234.609	457.633	360.123		214.838	202.006	146.012	237.443	191.449	206.715
L1MC4		148.156	203.335	164.681	228.678	276.777	149.779	217.199	171.739	304.887	581.897	277.566	221.647	861.5	790.596	642.794	580.257	1042.96	849.815		485.956	508.027	315.052	556.097	467.258	493.093
L1MC4a		62.5102	94.267	75.028	96.978	122.975	84.918	118.717	88.7432	188.134	301.908	151.736	126.601	303.869	262.235	222.225	220.746	382.479	320.839		193.671	234.323	171.558	296.144	237.371	241.057
L1MC5		73.5961	99.7136	79.2183	108.128	143.133	76.8392	116.123	89.9925	175.866	299.525	145.375	112.442	419.803	371.99	302.835	272.393	511.155	409.1		261.157	282.378	221.806	302.141	266.885	283.3
L1MC5a		129.942	159.463	119.955	156.727	207.284	106.879	153.773	117.345	204.131	382.074	183.973	145.225	642.011	530.913	429.938	415.722	695.859	604.571		337.093	356.844	233.145	377.056	315.411	332.807
L1MCa		29.8124	64.2442	44.34	55.9447	73.4477	41.6098	59.8765	51.6503	79.8061	209.418	87.088	58.5822	134.961	134.004	116.051	103.312	235.672	167.509		116.736	132.134	83.5162	153.359	122.816	124.251
L1MCb		4.68583	5.92801	5.32144	7.56581	9.69763	4.5763	8.43702	7.60161	14.1963	45.1705	9.36387	6.67094	16.5047	12.2129	12.4056	13.3403	26.7872	20.2517		13.9606	14.0476	9.12454	19.4718	12.8812	15.0265
L1MCc		11.6428	17.8426	12.2206	18.6074	20.6452	11.6328	14.4609	12.1447	20.6637	74.4927	20.6046	16.2181	48.2431	35.2147	34.5548	33.3567	68.5294	50.1978		28.7418	27.1263	15.5869	23.2188	20.6155	24.8995
L1MD		102.757	86.2095	116.728	69.1992	120.48	57.8716	66.4181	51.8777	91.3828	157.382	76.8526	56.3829	166.44	195.645	142.606	114.877	227.522	190.83		103.322	124.969	88.0501	148.132	125.594	119.456
L1MD1		44.5072	52.7698	42.7216	84.1016	97.1327	56.7102	83.7821	64.6662	138.04	236.318	104.06	80.7497	237.03	230.878	194.618	182.75	361.689	272.971		156.256	181.273	111.848	178.375	167.8	181.547
L1MD2		67.0239	105.885	87.6731	109.202	159.529	80.3081	127.688	102.638	171.801	342.201	152.546	118.724	314.798	331.587	259.982	258.573	492.442	395.252		233.53	270.616	174.988	287.516	245.75	251.245
L1MD3		24.6993	34.0106	30.3306	38.6262	54.6764	30.1519	42.7921	28.9726	51.8301	116.381	46.6175	37.425	132.372	130.076	98.6831	86.8149	164.077	133.236		85.8496	86.5958	59.6499	90.1368	75.3509	82.0822
L1MDa		52.6355	82.5738	60.8685	68.3067	89.0901	44.1866	55.9148	45.26	80.4438	198.587	75.6817	54.783	166.405	152.18	131.34	118.978	246.684	193.344		109.001	103.743	67.7319	137.268	108.324	107.698
L1MDb		3.59159	3.83297	2.79663	3.79298	4.0718	1.53247	3.7164	2.73164	5.09982	20.7886	3.84136	3.22338	13.3016	9.21628	8.38185	6.57612	12.5707	9.59618		5.82078	6.56689	4.86957	11.8134	7.82384	7.31982
L1ME1		189.159	270.625	232.135	288.288	410.996	253.384	356.04	275.765	493.941	909.773	417.24	322.292	818.647	889.673	715.675	696.465	1370.72	1038.41		697.896	820.809	667.994	930.164	822.107	816.501
L1ME2		74.129	129.465	107.032	109.565	159.367	83.1706	115.372	98.4581	173.238	311.837	149.719	115.023	362.309	403.156	305.21	308.075	532.107	460.151		275.096	318.416	220.379	348.334	290.694	286.869
L1ME2z		34.9115	50.0247	38.0292	46.9068	59.5124	37.294	50.3191	42.8451	75.6545	154.14	67.0638	51.9482	199.362	187.379	151.871	140.891	246.517	211.345		119.699	132.679	100.174	161.122	131.318	140.755
L1ME3		39.1989	52.1418	42.5404	67.7324	79.9937	47.4389	69.137	50.7836	101.116	198.578	77.1407	64.2802	223.367	228.966	191.748	186.652	320.34	264.677		174.932	187.944	136.093	198.464	185.588	188.774
L1ME3A		73.2944	107.467	94.3781	122.301	156.904	84.8553	129.984	101.394	185.578	371.845	154.392	121.756	370.624	404.613	324.379	286.635	519.406	466.165		271.571	305.402	218.866	311.365	276.503	282.308
L1ME3B		58.2905	94.73	79.7228	82.8501	118.97	57.2617	92.4373	81.0272	121.204	198.661	115.206	91.9615	252.745	274.786	217.071	213.216	377.131	293.266		193.367	227.701	177.804	251.871	217.746	221.669
L1ME3C		9.35575	10.3638	8.384	15.0477	17.9592	10.26	17.3673	13.2576	25.1968	51.5277	20.4049	14.2391	82.2	70.3151	60.3021	54.3524	101.036	76.3471		43.8385	44.0425	29.2597	45.6468	39.012	44.3929
L1ME3Cz		41.8854	59.5289	45.7782	58.3701	85.2886	48.9473	75.1472	58.8162	127.934	234.863	101.645	75.7927	292.95	292.537	219.342	188.098	362.025	302.134		164.271	204.041	138.902	254.956	199.535	196.149
L1ME3D		29.7093	33.5335	35.056	33.2486	46.8709	22.6917	33.4417	22.7285	49.1712	84.8609	35.5537	25.7356	122.477	130.011	100.658	88.184	146.417	119.926		77.021	82.3752	59.181	85.4821	75.9923	71.1367
L1ME3E		37.3354	50.2605	43.1745	58.238	55.4275	38.7128	46.1761	33.7677	67.4304	109.431	52.6025	42.4552	151.192	172.427	129.039	121.707	179.695	169.304		92.8641	118.311	90.7336	130.304	122.582	115.395
L1ME3F		19.9287	30.9856	24.7741	35.9609	43.7434	24.474	43.7897	37.0984	77.9611	124.507	65.2799	64.1997	105.528	98.2408	84.2945	80.2557	155.9	125.822		72.0283	95.8494	86.8879	191.674	134.458	120.79
L1ME3G		70.8967	100.955	84.2066	102.903	135.638	83.4938	119.771	97.6487	187.879	316.08	153.529	125.02	429.423	469.653	341.757	300.29	543.606	458.187		256.623	321.53	213.466	334.699	296.29	309.639
L1ME4a		80.9173	115.462	93.314	109.16	158.778	88.2904	160.24	154.27	270.381	413.503	217.113	170.159	791.501	1017.31	690.205	611.789	977.308	885.344		531.621	764.85	584.759	794.284	738.855	672.449
L1ME4b		120.29	173.912	142.645	173.579	223.757	131.917	200.532	145.301	287.535	472.668	234.043	187.552	691.574	704.976	541.417	500.125	853.972	716.927		460.572	534.361	395.876	573.186	493.766	501.924
L1ME4c		36.1189	44.4943	35.827	47.1239	64.7286	37.7419	54.1669	44.4897	91.4091	147.27	69.3267	54.7018	272.286	351.984	235.255	237.896	367.514	332.899		231.578	450.432	306.702	383.172	457.568	443.148
L1ME5		10.6579	18.6196	13.5075	17.4407	22.9208	14.8239	17.7342	16.2942	25.0086	72.0976	25.9932	21.9449	89.1857	85.9729	67.0346	62.8379	97.5543	85.9389		56.8963	45.8286	31.6448	54.5115	46.2139	55.5099
L1MEa		0.897711	1.06044	1.25233	1.67946	2.39909	1.69306	4.35275	4.61191	3.3586	9.91237	4.80732	2.71438	3.07405	3.35108	3.15768	2.82168	5.23994	5.21066		4.63684	6.1229	4.0876	3.53073	4.74702	5.49964
L1MEb		6.61152	6.92818	6.69545	10.2279	11.2611	6.01791	10.3477	8.07365	14.4076	34.2562	12.0354	7.71943	31.5093	22.1484	20.0587	19.5663	44.3969	31.3869		18.0676	20.4822	17.3602	21.0287	19.7726	21.39
L1MEc		68.2132	120.222	98.1063	126.946	161.837	102.442	121.595	91.1235	163.827	428.491	151.511	113.867	364.911	330.766	290.627	290.015	577.543	428.366		258.048	249.913	153.168	273.649	217.494	229.314
L1MEd		56.5074	83.8564	71.3421	90.8112	130.824	67.3564	107.899	92.9772	197.827	364.055	156.507	132.661	360.743	354.32	288.968	269.317	527.138	412.188		249.54	309.119	239.891	503.306	339.189	319.227
L1MEf		55.2118	77.7163	54.6957	74.2377	97.2375	51.5123	80.9487	61.3751	111.317	267.417	103.235	77.7627	281.565	262.028	216.079	207.204	390.763	305.284		180.059	188.482	112.72	191.571	169.206	182.472
L1MEg		48.4106	85.3577	64.9138	79.8178	110.253	65.2352	97.8844	75.8205	128.024	278.477	116.45	94.1495	230.576	206.474	186.649	174.865	353.59	270.301		177.769	172.656	121.822	185.381	158.946	177.724
L1MEg1		1.89036	3.61116	2.18794	3.83705	3.60221	4.44219	3.69624	2.11502	4.79007	17.1688	5.07952	3.20756	13.1752	9.94987	9.26741	9.64913	21.1825	13.4377		9.06821	8.1694	4.20624	7.87892	5.04434	7.71868
L1MEg2		5.5961	9.2025	8.06028	8.50602	12.7354	5.4815	9.47608	6.91403	7.00636	16.32	9.92935	9.26422	24.6652	30.8896	22.524	21.1744	32.4079	30.492		21.5595	35.218	13.1258	17.7835	19.9233	22.062
L1MEh		6.75787	9.79326	7.95854	10.4515	12.5432	7.98723	10.0861	8.85987	16.9402	46.4325	13.9032	11.1285	38.2575	30.3844	26.9143	25.3844	48.4193	36.2622		23.0464	25.624	15.2167	31.0043	22.9216	23.1828
L1MEi		13.8876	18.3798	15.3072	19.357	27.7596	16.0087	22.2067	18.5277	39.3532	89.6516	31.0248	23.3598	68.1813	55.2577	47.8092	44.4703	97.4741	72.958		43.874	49.1131	29.9439	55.941	43.3638	45.5551
L1MEj		9.98575	15.4953	9.89008	13.3746	17.6369	9.07984	13.0344	11.1677	20.8079	44.1346	19.0915	13.2807	52.4931	49.2301	40.4757	35.7972	70.9982	56.1715		32.4051	32.3087	25.9276	42.5984	33.6178	32.3018
L1P		0	0	0	0	0	0	0	0	0	0.466656	0	0	0	0	0	0	0.403772	0.431038		0	0	0	0	0	0
L1P1		14.3969	19.0984	14.1056	20.5418	27.0243	13.5267	18.8555	21.5534	32.2682	138.015	27.2368	19.5214	68.4651	45.9115	46.8438	49.8611	104.861	75.1623		47.67	46.551	29.5849	49.2595	38.4127	41.0188
L1P2		19.9275	26.6115	17.3768	29.9984	33.5592	19.604	27.5098	22.4459	28.3589	142.741	34.572	24.5873	78.8193	67.4574	59.6881	63.5427	134.646	98.9559		70.9547	57.3526	32.3453	47.0442	47.2901	57.9789
L1P3		16.9283	26.8214	18.2115	23.4128	29.9057	15.4169	20.7616	21.4527	34.951	147.635	28.602	22.6963	71.2292	40.9269	41.8834	47.2857	102.611	67.4248		36.9179	33.6628	21.2097	46.9389	32.3132	37.5367
L1P3b		0	0.522155	0	0	0.415783	0	0.454457	0.767258	0.53009	4.26609	0.413926	0	0.474626	0	0	0.40791	0.528984	0.612286		0.905707	0.687501	0.480992	0.684337	0.462806	0.522284
L1P4		8.13894	15.5185	11.6721	15.9028	20.3318	8.56589	15.6004	11.0839	27.1391	66.2065	19.3032	12.9754	40.0325	37.2675	31.0745	32.4786	72.5514	48.7909		25.9609	31.1702	19.7975	29.7009	27.1132	30.344
L1P4a		2.54042	2.40678	2.07171	3.40062	3.62438	1.80672	2.81453	3.64019	6.87984	35.5658	5.43552	3.68122	11.7324	8.17841	8.74249	7.2054	19.123	10.4528		6.29195	6.0353	3.85002	7.76415	5.40704	7.48541
L1P4b		1.18827	2.40447	2.78983	2.71907	2.82419	3.22721	2.60478	2.10489	1.7493	12.3971	1.37293	2.29094	1.4835	1.83611	2.71462	5.12151	4.36348	3.08804		2.45098	2.60336	2.08244	2.2676	2.09913	2.83279
L1P4c		0	0	0	0	0	0	0	0	0	1.82489	0	0	0	0	0	0	0.790182	0.443352		0	0	0	0	0	0
L1P4d		0	0.454997	0	0	0.637719	0.553179	0.495364	0.949868	1.61998	12.1319	1.466	0.57176	1.11627	0	0.539212	0.719514	1.31421	1.29778		0.703794	0.539162	0.476701	0.721359	0.489007	0.634476
L1P4e		2.78896	4.5674	4.43009	3.58205	3.80602	2.72533	1.86199	1.96765	1.42431	14.2458	2.96924	1.84192	2.62595	2.29188	3.36246	4.14681	6.39919	4.59894		1.96873	1.04941	0.888262	0.942655	0.719279	1.48276
L1P5		0.580647	1.00694	0.831239	1.30416	1.33095	0.83245	0.475107	0.597682	2.07034	3.66793	0.899737	0.685608	4.79055	3.20722	3.12352	2.88806	7.12187	5.42612		3.28641	1.63818	0.446421	2.09836	1.41226	2.09696
L1PA10		226.268	138.898	145.699	160.14	189.124	88.1549	145.544	134.732	3335.43	645.639	268.951	204.078	280.086	230.97	194.665	251.799	518.812	392.9		215.227	164.451	107.926	257.092	144.771	189.724
L1PA11		33.9636	45.6676	35.0439	63.2149	75.4843	31.1071	48.4845	34.432	67.073	233.065	54.3864	42.9361	108.454	62.2129	62.8852	72.2284	153.332	111.163		58.1846	58.0794	34.2467	61.0236	52.9313	65.1866
L1PA12		13.2878	18.9939	12.8295	30.3753	29.2634	20.9319	26.4505	18.4281	28.4817	96.5906	26.6362	22.1724	84.4149	38.2863	43.0389	59.3386	112.213	99.8887		42.7268	30.778	20.4966	31.1117	26.6836	41.8593
L1PA13		47.2778	66.6006	47.7139	70.8795	85.9388	42.1589	70.9362	57.5794	109.23	410.661	98.0966	67.6356	192.543	111.23	117.632	134.622	273.742	217.792		126.223	125.558	91.8952	133.5	112.419	136.702
L1PA14		20.024	31.1261	21.1517	28.0939	37.7562	19.6053	32.5607	27.5944	43.555	157.633	45.8796	33.9078	86.2475	50.7391	47.8153	48.6892	103.648	73.3795		47.6184	62.8805	39.35	57.0525	45.6096	53.8647
L1PA15		37.8983	47.4747	37.8024	60.5855	77.8372	40.5493	59.6698	48.0498	104.426	380.01	78.7457	52.6402	150.742	102.458	105.292	104.406	223.703	164.111		97.2287	106.931	65.0155	119.166	95.0638	102.958
L1PA15-16		3.84669	4.64041	3.28337	6.61963	8.03778	4.35301	6.23854	5.91776	11.1852	68.0448	9.82006	6.81626	16.789	11.7185	10.3319	12.14	26.3754	19.6643		12.2565	10.7816	7.09233	13.0151	10.6096	12.2953
L1PA16		84.9038	93.4285	72.6015	105.689	141.384	80.1509	106.177	88.4018	158.023	540.018	139.01	96.3384	274.974	231.421	199.577	194.175	420.574	298.151		201.988	192.189	138.762	231.06	175.969	206.281
L1PA17		25.0016	33.4846	25.5425	42.1545	49.7723	27.9107	42.6522	28.5346	62.6745	170.728	50.7773	34.5825	96.1127	75.3508	60.3288	54.2278	119.4	87.8473		54.984	52.6089	32.9609	69.6851	52.5411	55.5585
L1PA2		28.8837	41.2728	32.4564	48.8558	69.7172	31.6324	44.2853	42.7796	86.4447	327.512	64.7944	50.6191	122.123	82.1898	74.83	84.0038	180.859	123.548		91.5618	85.1149	56.7789	120.936	82.4679	83.2009
L1PA3		90.425	143.184	110.018	154.253	231.721	107.901	139.781	130.068	220.169	815.867	189.345	151.704	373.649	268.6	250.363	283.168	602.723	417.955		271.686	249.867	162.656	272.989	222.528	249.263
L1PA4		103.876	147.294	111.192	164.434	230.761	101.137	166.379	147.625	242.092	944.729	224.779	190.808	373.853	301.237	274.701	302.715	672.86	440.532		302.067	294	204.746	302.336	292.72	331.739
L1PA5		97.8741	139.892	105.827	169.196	212.987	104.06	168.272	132.481	223.533	885.017	208.157	173.299	403.992	298.285	265.259	317.26	659.64	447.117		298.227	290.749	200.612	295.218	254.21	321.683
L1PA6		73.3808	114.798	91.3661	145.048	174.23	84.4644	157.107	133.951	190.046	681.627	179.529	131.613	355.994	244.067	241.473	282.545	547.127	393.749		242.141	219.235	149.798	200.097	179.579	215.244
L1PA7		184.961	221.811	162.12	223	282.076	159.11	243.758	178.338	321.903	1183.22	307.144	209.733	506.98	305.469	325.531	380.111	838.019	579.604		335.981	313.423	197.745	378.546	272.633	313.306
L1PA8		41.5679	57.3676	40.826	64.0259	87.0896	42.1653	64.1519	54.361	116.803	397.004	91.8785	64.0148	157.827	109.975	103.359	120.008	255.967	168.556		109.52	116.127	109.918	162.026	123.916	135.08
L1PA8A		15.8545	31.2924	23.3131	27.2093	36.8162	19.7428	31.9628	24.1424	48.6217	177.206	39.0997	26.1671	62.2647	38.6956	39.7852	42.2861	99.2845	66.9785		37.4047	38.1974	27.3865	52.8672	33.8771	36.0146
L1PB		5.35183	6.84064	5.71573	9.89899	11.0863	5.43389	7.49028	6.44149	13.3123	41.8616	11.0258	7.95623	29.9817	22.0972	18.7266	21.9278	49.9749	37.0686		16.4719	17.5459	9.629	19.777	16.1567	17.3204
L1PB1		61.5358	83.0379	61.6145	143.08	172.105	81.0323	130.533	100.732	200.141	659.332	174.828	121.153	321.718	194.545	193.964	232.246	511.186	376.175		233.142	236.477	142.158	261.377	203.94	231.909
L1PB2		10.2049	12.153	9.51504	19.5609	23.1341	12.5692	16.6344	13.1929	29.8406	92.8955	22.2077	16.165	54.7567	41.8339	36.6735	41.4563	84.7673	57.4705		38.87	30.4555	18.9693	41.0464	27.616	31.3395
L1PB3		11.7214	16.3702	13.2036	22.2361	26.1247	15.1772	20.335	18.5135	38.8189	119.127	29.2691	21.4857	53.1095	38.5279	34.1309	33.7091	84.1466	55.9037		32.3886	36.8577	19.2084	47.4952	33.1409	35.304
L1PB4		29.5206	29.3619	24.6654	40.5687	48.0393	28.6325	50.9541	34.5783	77.7701	237.756	71.8169	43.4654	123.891	102.276	94.1502	94.2827	178.15	134.875		82.8887	97.6369	62.6784	112.14	78.7072	92.9292
L1PBa		13.3986	15.7655	11.2301	19.6999	24.744	11.8377	16.8867	15.8545	30.0993	139	26.6568	16.9866	47.4907	34.6952	32.6782	31.0609	76.7844	54.7959		36.4405	30.8349	23.3392	45.0726	31.9201	33.9029
L1PBa1		2.5983	4.16285	3.13695	6.5957	6.12183	3.24867	3.68554	3.41992	7.07689	41.0361	4.42297	3.97556	20.4166	14.6928	14.5707	15.7301	30.9379	24.2895		9.59246	8.415	4.40724	5.84538	5.81387	7.15423
L1PBb		1.72397	1.43027	0.953849	2.20005	2.25078	2.263	2.64894	2.05012	3.40237	23.0254	3.51097	2.6568	5.27031	4.56191	4.16868	3.54075	5.2252	6.22922		5.40926	3.7879	1.87192	4.33912	3.19101	4.52632
L1PREC2		33.9195	39.6216	30.7515	56.7821	71.1973	39.1704	56.0066	49.3357	103.335	333.223	89.868	66.2194	239.163	196.511	163.565	180.026	347.572	257.829		139.719	131.766	81.5148	126.017	113.253	137.53
L2		273.172	364.556	311.162	509.894	679.06	347.834	572.108	416.355	1072.8	1541.21	650.56	512.32	1511.21	1177.84	1134.26	1062.04	2031	1544.87		1136.14	1000.69	678.577	1066	937.535	1128.88
L2-1_AMi		3.22755	3.81681	3.87561	5.73872	8.49136	4.60982	8.0122	6.05432	14.6912	19.8915	8.99955	6.89056	13.6559	10.1474	9.95686	9.10567	22.0131	14.5791		11.9651	10.4004	6.8828	9.85711	8.62415	11.4904
L2-1_Crp		0	0	0	0	0	0	0	0	0	0.471996	0	0	0	0	0	0	0	0		0	0	0	0	0	0
L2-2_Mam		0.430069	0.779524	0.611611	1.09897	1.03355	0.586705	0.878714	1.21995	1.44689	6.1435	1.48266	1.48821	8.6045	6.65374	5.61287	4.25363	8.83126	6.29522		5.32006	4.99783	3.0067	4.41141	4.15006	4.24675
L2-3_AMi		0	0	0	0	0	0	0	0	0	0	0	0	0	0	0	0	0	0		0	0	0	0	0	0
L2-3_Crp		7.2074	8.06776	6.3602	14.4619	17.7083	10.8628	18.7848	11.5145	37.8448	44.6924	23.0269	15.6795	38.9971	28.165	30.5004	29.1125	55.6922	43.3125		30.0369	23.8504	14.4431	23.916	22.4597	27.9949
L2a		777.837	1044.07	864.515	1447.49	1848.29	1005.27	1560.16	1165.17	2880.32	4335.07	1792.79	1456.77	3969	3478.79	3298.19	3177.2	6186.46	4616.99		3550.06	3191.61	2325.32	3406.44	2965.97	3460.98
L2b		355.623	505.142	407.036	723.437	868.282	526.731	770.428	597.405	1307.24	2231.54	889.554	738.097	2243.37	2045.42	1974.37	1935.83	3428.41	2710.25		2138.2	2007.77	1530.12	2037.75	1863.28	2181.22
L2c		493.032	674.539	537.496	923.075	1162.18	651.299	1028.87	829.542	1810.03	3067.63	1251.68	1036.87	3019.86	2482.6	2435.91	2375.26	4377.3	3416.03		2481.61	2374.45	1766.28	2797.19	2328.8	2673.27
L2d		110.402	119.066	94.9021	161.351	189.912	108.409	163.82	128.525	295.741	512.015	191.818	159.421	661.272	563.235	544.737	530.601	927.017	712.84		554.617	508.52	410.807	489.579	489.968	565.416
L2d2		167.833	215.151	173.825	288.352	353.915	196.036	301.863	239.241	536.267	905.372	363.356	284.939	1144.02	975.103	943.649	945.106	1533.29	1261.26		903.476	845.486	597.754	837.651	737.602	868.507
L3		203.178	282.085	219.404	309.869	380.486	219.044	294.231	261.059	444.845	888.31	371.823	322.783	1234.56	1083.74	1065.59	1066.32	1701.07	1332.43		971.176	890.726	737.098	1029.35	887.587	968.313
L3b		35.3591	39.9772	36.4666	43.439	56.432	29.352	44.4723	41.6836	72.1604	137.561	58.3211	49.9849	243.882	225.898	230.747	237.827	356.411	282.717		194.39	187.427	132.718	179.3	156.945	200.938
L4_A_Mam		35.425	35.5987	30.1762	47.9367	59.2985	36.7388	59.4749	51.0601	78.6712	166.944	72.7267	60.1179	152.876	113.188	107.745	100.88	200.354	143.16		95.2436	89.5267	72.2828	96.2146	87.2471	104.597
L4_B_Mam		12.0257	14.8339	11.0952	18.5798	20.4026	12.8907	20.2269	14.9458	34.7094	59.5502	23.5738	19.3196	67.0226	44.063	42.5099	41.1527	76.9191	56.1054		42.7627	51.0038	27.8752	44.2832	36.14	46.2671
L4_C_Mam		14.8598	19.0124	15.2246	23.8715	27.2076	20.4438	25.6667	22.3319	45.192	89.577	34.8023	27.4578	126.985	128.696	153.072	178.962	237.022	186.868		132.757	107.449	82.6695	99.5559	95.8315	124.072
L5		2.27791	3.26939	1.99597	2.95435	3.13898	1.92774	3.22205	2.51617	5.75346	12.1853	3.28826	3.33973	14.3551	11.9276	11.1144	11.9413	19.0751	15.6742		7.91767	9.19805	4.71227	12.8959	10.6346	10.5354
LFSINE_Vert		7.01306	11.0025	10.2951	12.575	14.4554	14.0105	44.039	25.5271	54.5693	79.0745	52.4574	27.2786	184.958	155.077	183.797	197.458	216.773	186.957		164.912	122.163	93.3798	100.818	100.914	113.223
Looper		2.42832	3.61306	2.4003	4.28624	4.96387	2.42996	2.26574	3.89544	11.7752	8.85953	4.66367	3.61073	22.7329	16.6115	13.3956	10.4975	28.9056	19.1491		8.50326	8.43408	4.07635	11.1678	7.99696	6.64037
LOR1-int		28.4541	48.3099	38.0341	23.8565	32.0686	17.8694	27.854	28.4633	23.3763	58.1489	29.8512	34.7451	61.4177	43.8072	46.6678	48.8524	65.7569	53.9029		39.4875	34.3767	29.9703	33.4496	32.9864	38.836
LOR1a		3.044	4.79989	3.89301	5.87094	7.11112	7.06225	5.86215	4.29005	10.9138	20.2062	7.46114	5.52799	15.0231	20.994	17.3139	14.2973	24.873	20.0734		15.7076	14.9367	14.0147	20.0389	16.6979	16.3013
LOR1b		3.86432	7.25433	6.86734	5.68704	8.94858	4.50388	6.32168	5.00917	6.78196	23.062	6.00148	5.19437	8.72684	8.57943	9.66622	10.1616	18.5	14.7163		10.9329	7.15635	5.98217	8.92699	6.40544	8.26546
LTR06		0.415856	0	0	0	0	0	0.534797	0	0.857688	2.15	0	0	0.622564	0	0	0.503747	0	0		0	0.534758	0.516499	0	0.448822	0.502674
LTR1		0	0	0	0.962934	0.964941	0.854913	0.866434	1.05171	1.36581	13.564	1.2913	1.27652	2.71186	2.07667	1.62753	1.43307	3.59535	2.3443		2.02582	2.11577	1.93855	2.97313	1.79515	2.27902
LTR101_Mam		2.62809	4.062	3.61824	4.7647	6.47329	4.07341	5.20792	3.35827	10.2759	23.4973	7.50943	6.17011	12.8704	9.94864	10.2449	11.3177	23.4642	18.5525		10.2992	8.45948	6.73045	8.97305	8.7175	11.0396
LTR102_Mam		1.19873	0.973666	0.781135	2.15973	2.12358	1.29075	2.92302	2.78744	4.49487	14.2235	4.19433	3.75016	14.5767	11.4037	10.2655	9.84809	14.0036	11.1787		8.80418	9.22681	6.98826	8.26381	8.6094	11.4676
LTR103_Mam		2.2709	2.43506	2.27395	3.02581	4.04109	3.07266	3.92211	4.49525	4.83115	17.5047	5.94329	5.38329	4.00399	4.93941	3.96933	4.13373	8.43495	6.35579		7.50355	6.54626	3.40571	9.05111	6.81041	7.51315
LTR103b_Mam		0.620402	1.16575	0.664807	1.56501	1.74707	1.42485	1.3118	1.48813	3.35443	7.31213	1.53605	1.2796	3.27313	4.32579	3.57423	4.01083	12.7385	6.47307		5.39221	5.16248	2.36559	3.86819	2.8146	3.42094
LTR104_Mam		3.6324	4.83247	4.55761	6.14785	7.86836	5.76647	6.49568	5.8766	9.30477	35.6128	7.03144	7.36015	16.3228	17.7786	15.6263	17.0059	29.3416	20.6603		18.41	19.5201	10.9657	17.3969	14.541	17.5753
LTR105_Mam		1.70199	2.56801	1.78407	3.4175	2.62783	2.23484	2.32144	2.72646	4.64636	18.718	2.54702	3.00958	5.10361	3.08387	3.22149	3.81584	8.34566	5.44725		3.59358	2.9787	2.74291	6.1828	4.88608	4.6268
LTR106_Mam		1.11685	3.28555	2.55027	2.68543	3.6272	1.82717	2.88792	5.03132	3.2636	9.13099	4.65968	3.8516	6.05149	6.13023	5.21093	4.91521	12.1222	7.51438		6.15231	5.64889	3.54684	4.47997	5.13771	6.22599
LTR107_Mam		0.88003	1.19097	0.777907	1.73601	1.85317	1.2237	1.32949	0.850309	3.48451	5.07339	1.29453	1.0796	4.6226	4.76713	4.40666	4.38513	8.88996	5.76767		3.68146	3.05093	2.52936	4.95232	2.94178	3.80147
LTR108a_Mam		1.71849	4.01497	3.14481	5.53791	5.64826	1.77118	1.56981	1.6501	1.17532	2.37685	1.97422	1.69814	2.28603	6.05471	5.90032	6.55821	12.0259	7.26311		5.59	4.04389	2.27158	2.82076	3.16012	4.09582
LTR108b_Mam		0	0	0	0	0	0	0	0	0	0	0	0	0	0	0	0	0	0		0	0	0	0	0	0
LTR108c_Mam		0	0	0	0	0	0	0	0	0	0	0	0	0	0	0	0	0	0		0	0	0	0	0	0
LTR108d_Mam		0	0	0	0	0	0	0	0	0	1.27223	0	0	0	0	0	0	0.403339	0		0	0	0	0	0	0
LTR108e_Mam		0	0	0	0	0	0	0	0	0.896802	2.61894	0	0.434908	0.736238	0.687453	0.613051	0.716504	1.51625	0.972991		0.463997	0.567828	0	0.453864	0.4493	0.511003
LTR109A2		0	0	0	0	0	0	0	0	0	0	0	0	0	0	0	0	0	0		0	0	0	0	0	0
LTR10A		2.2628	2.03921	1.99535	2.7476	2.97809	1.72089	2.99775	2.02765	6.74171	15.0107	3.26335	2.91457	10.3684	11.1738	7.01126	4.49264	8.58985	7.19657		5.55499	6.57298	3.58771	8.02203	5.94407	6.06081
LTR10B		1.41831	0	0.433017	0.441205	0.554759	0.653757	0.89197	0	0.673945	1.37142	0	0	2.60698	0.997942	1.32214	1.00065	0.920182	1.07206		0.441967	0.82165	0	0.430896	0	0
LTR10B1		0	0	0	0.739823	0.807835	0.419075	0.614073	0.47518	1.33036	3.02255	0.459249	0.467879	1.36921	0.870158	1.05195	0.840097	1.50253	1.29673		1.29925	1.43205	0.449709	1.12181	0.833198	1.14142
LTR10B2		0	0.657882	0	0	0.46345	0	0	0	0.778625	2.02025	0.531051	0	1.00181	0.584603	0.688456	0.726382	1.07433	0.772387		0.687119	0	0	0	0	0.5422
LTR10C		4.23503	4.49875	3.85245	7.21101	6.79945	4.55886	6.21441	3.49725	7.81783	17.9069	6.29698	5.03309	27.2857	23.0824	16.9706	16.3605	31.9019	24.3483		14.9565	10.8233	6.96894	14.6861	10.987	12.4379
LTR10D		1.21253	1.15091	0.934686	1.20195	1.63476	1.12312	1.63931	0.859667	4.00365	6.09286	1.30895	1.44525	3.43166	2.91434	2.58813	1.95971	3.43875	2.63528		2.71515	1.82001	1.9087	2.33026	2.03516	2.46933
LTR10E		1.92096	2.40299	2.24501	3.90062	4.31062	3.60404	3.64807	2.94644	4.71802	8.33191	3.53274	2.82087	9.27961	9.34692	6.84154	8.18337	12.7561	11.3422		9.49964	7.82387	6.30298	5.30599	6.11322	7.5746
LTR10F		1.04568	0.575797	0.614124	1.33952	1.70956	1.74335	2.52934	1.66268	7.08582	10.6324	2.86215	2.20108	2.9011	2.51401	1.96747	1.90754	4.57161	3.40477		2.90981	4.26241	4.19345	11.1614	7.53888	7.52721
LTR10G		0.848875	1.72238	1.28266	2.22024	2.95741	1.7457	1.4256	1.32135	2.305	3.59165	1.71892	1.43926	2.01636	3.43577	2.98335	2.85551	5.51284	5.2721		3.58792	2.79411	2.02063	3.95921	2.73635	2.96888
LTR12		3.67149	5.15685	4.94533	8.32038	9.87291	6.46347	7.59631	8.45745	11.3279	43.9034	10.4667	10.8242	11.7124	10.0456	8.52449	11.1221	18.2362	14.4686		14.1398	16.4971	11.4773	14.9088	15.0065	15.2591
LTR12_		3.03798	4.43214	4.11505	6.17455	6.14993	6.43028	5.65539	3.37461	5.72958	25.668	6.35092	4.98258	14.1265	17.8293	15.739	13.1392	14.8396	18.7729		17.0656	13.3611	9.12333	14.1299	10.9095	14.663
LTR12B		0.586743	0.69142	0.446857	1.21331	1.13409	0.787861	2.04242	1.71145	5.84115	7.09964	2.45913	2.04907	3.74727	3.8434	4.20142	3.2306	5.01677	5.89949		3.77846	5.04774	5.73228	6.21213	5.95522	7.06643
LTR12C		41.2934	50.8074	41.3615	81.3444	78.1229	62.0375	71.5828	51.6327	68.5786	314.888	70.767	74.5908	133.052	117.533	102.884	105.567	191.348	143.491		123.09	98.1053	79.9693	93.2804	84.3588	96.5736
LTR12D		1.97033	4.46126	3.52085	6.36069	6.31366	5.63907	5.85006	4.55753	5.51461	29.8768	6.04899	6.18159	6.93858	10.0932	8.65654	9.02971	18.1322	11.2707		12.0734	11.3105	6.94631	9.69982	8.01434	10.0846
LTR12E		3.45405	3.43503	2.58166	6.00935	3.5737	2.46382	1.52327	1.27477	2.50465	10.9752	2.01915	2.04606	5.66993	3.86594	3.68818	3.90607	5.39225	5.28369		3.2571	1.86998	2.50431	4.54638	2.95674	4.1921
LTR12F		1.93266	2.79304	3.54111	5.92396	7.74484	5.54017	6.67471	4.7842	7.77408	22.5744	6.67902	6.84499	6.46311	6.7928	5.24276	6.40909	14.8836	10.9692		9.16489	6.97419	6.63126	7.53369	7.49118	9.32388
LTR13		25.7173	41.714	37.2247	56.0437	64.9592	44.2744	52.8514	36.7232	49.6946	89.6388	45.0232	45.3713	72.1406	101.905	86.9685	91.2408	136.648	113.338		94.4938	58.3666	60.8293	82.9396	70.5217	70.7516
LTR13_		0.440731	0.918457	1.0382	1.4955	1.83845	2.60832	1.41102	0.714417	1.57398	5.5002	1.23626	1.13673	1.52703	2.95354	1.9026	1.96227	3.92988	4.45332		4.22319	1.9264	0.910838	2.62107	1.59419	1.41714
LTR13A		6.53747	9.37589	9.16431	14.8094	15.0963	18.1376	13.9705	10.2016	17.6884	24.2381	15.1824	12.6793	18.1787	26.1041	20.7558	20.7637	32.6496	30.5407		39.4178	26.8847	33.3432	34.636	32.8579	29.7643
LTR14		2.20124	3.94656	4.31053	4.12246	5.95907	4.60513	4.05209	3.50664	5.48303	6.80448	4.26273	3.71695	4.58117	6.53847	5.76779	4.97746	9.99046	7.29765		6.2081	6.63039	6.69157	6.7324	6.04745	6.82691
LTR14A		0.533002	0	0	0.932822	1.25965	1.43625	1.39884	0.576887	0.933989	2.43028	0.85412	0.928844	2.90197	3.50309	2.34421	2.44637	3.2736	3.19447		1.94136	2.40816	1.99085	2.86209	1.97717	2.41066
LTR14B		1.32322	2.37394	1.9705	2.97014	3.85096	2.04207	3.20364	2.43185	4.30877	11.1502	3.71053	3.30725	14.3528	13.4113	14.1176	16.4037	20.9863	18		13.9972	11.4676	7.3879	12.1152	13.3924	14.329
LTR14C		0	0	0	0	0	0	0	0	0.713169	2.6996	0.577366	0	1.05579	1.72603	1.65571	1.70796	2.08891	2.34801		1.91304	1.49739	1.06344	1.83725	1.35105	1.3654
LTR15		1.81697	1.25865	1.59571	3.30578	3.16463	2.06285	4.57781	1.91107	4.98584	7.82416	4.49258	3.13553	20.0939	17.0662	16.4672	15.9246	21.0652	18.3764		12.865	13.1234	10.5904	14.6625	12.0764	13.3761
LTR16		7.34137	14.1707	11.4259	17.1547	18.8204	11.4994	13.2011	16.0057	15.7877	80.8094	17.4444	15.1671	22.2784	21.5996	23.353	25.375	48.368	36.384		27.832	23.9646	17.5165	20.6579	20.9203	24.2005
LTR16A		10.4421	14.0772	11.962	21.8558	24.4014	13.0416	21.9492	18.3692	33.1001	112.637	29.0357	26.8946	37.7158	33.1343	32.5289	33.961	68.215	52.8971		39.2335	34.0971	23.7948	42.4813	33.1775	39.1022
LTR16A1		6.63095	7.03357	5.61047	12.641	13.6694	10.8457	13.4798	9.19909	18.7932	73.0514	15.3904	13.2351	29.1665	31.0565	30.893	29.1747	54.332	42.3999		32.9203	35.4575	35.4969	51.8272	42.9139	49.266
LTR16A2		3.74657	5.54243	4.85239	7.6791	8.31213	6.45375	7.74259	5.70636	11.9576	50.9465	8.16603	7.4585	18.0348	15.5282	15.8778	16.7282	25.627	20.297		15.5484	14.1881	10.5189	14.6692	11.8918	14.1766
LTR16B		2.29397	4.94758	3.68709	4.8746	5.33453	2.34682	4.04568	4.02422	4.2547	18.7206	4.5831	5.22008	7.46116	5.38544	7.13475	7.17132	13.6375	9.79775		6.5281	5.47468	3.24018	5.61515	4.29853	7.00972
LTR16B1		4.07359	4.31349	3.95909	7.26935	9.38985	5.28034	8.76361	7.18215	11.4371	35.9668	9.9044	8.36046	13.8798	10.0914	9.79544	8.3413	16.3746	11.9847		9.45666	8.79839	7.89337	8.19355	7.3611	10.3494
LTR16B2		5.19615	5.64209	4.73302	8.08013	9.8233	7.45953	8.0228	5.39914	10.8596	40.5368	8.07925	6.58379	14.5218	19.7435	17.0967	17.4524	29.4184	22.1392		17.788	15.7118	10.4586	19.0408	14.3049	14.8021
LTR16C		31.1946	35.1924	30.0141	49.5671	62.2476	33.417	53.8144	43.8742	54.6491	203.66	58.0446	56.0637	79.1635	74.6919	80.7631	76.5378	122.092	94.4906		83.694	79.74	62.5625	79.0408	66.0529	85.3367
LTR16D		3.42702	5.19112	5.2076	8.20591	9.49995	6.05144	8.32302	8.03904	12.7568	29.9424	8.59376	8.41448	7.44472	6.43744	6.48383	8.45074	15.9546	13.8982		8.42263	9.85095	8.90816	10.3547	9.85382	10.7923
LTR16D1		20.9129	6.2799	5.94995	28.9878	14.4474	2.29653	1.39363	0.542073	1.23771	6.05886	1.79144	1.57878	6.55477	6.33268	6.18688	4.86903	8.64925	12.0339		15.6535	17.0889	26.018	21.1554	21.4625	17.8999
LTR16D2		1.41216	1.16038	0.743441	1.71956	1.30164	1.39133	1.7341	1.06288	2.3471	7.38764	2.00101	1.22787	4.17025	2.57712	2.92734	2.76367	5.42174	3.56646		2.20454	1.75409	1.44233	2.21942	2.08044	2.00779
LTR16E1		4.18911	5.40604	4.16344	8.26	9.29472	7.7274	9.34992	9.34249	15.3675	61.9108	10.9536	11.157	19.3421	19.6626	19.8021	21.8961	37.2041	29.5481		25.7969	29.0222	22.1163	23.1112	25.2105	29.7869
LTR16E2		5.61038	6.26706	4.79614	9.05103	10.7725	7.9289	9.70444	7.64746	15.3469	65.3102	11.5109	11.5259	26.4687	24.912	24.7846	25.9627	46.3954	31.3717		27.4754	23.863	18.0345	23.4871	21.9326	25.86
LTR17		11.7599	10.0099	10.3103	10.4714	12.2533	9.27429	12.9112	8.99571	11.5995	33.9408	12.551	11.8834	11.7264	11.8748	12.8107	11.0653	15.9889	14.4229		13.6031	12.8344	10.9799	11.8732	11.5582	15.6494
LTR18A		1.47092	1.27076	0.739805	1.18598	1.0997	0.419075	0.742115	0.790167	0.924736	3.93752	0.826152	0.869748	3.00411	1.56166	1.84552	2.16574	4.29056	2.66104		1.61748	0.680004	0.410061	0.682613	0	0.80405
LTR18B		0.933993	1.14218	1.24952	2.40605	1.91472	0.921965	0.975465	1.61215	3.13163	15.1127	2.14914	2.18122	3.2715	2.10835	2.14275	2.79773	4.41576	4.34058		2.84335	2.30232	1.47877	2.41208	2.23215	2.64204
LTR18C		0	0	0	0	0	0	0	0	0	1.01981	0	0	0	0	0	0	0.741987	0.495788		0	0	0	0.471187	0	0
LTR19-int		1.5125	3.04275	1.81813	2.93911	4.06159	2.22948	1.93936	2.55653	6.19699	9.18653	3.68163	2.75074	7.94885	4.16538	4.93858	4.33588	10.2052	8.38242		5.61283	4.06545	2.31533	3.75416	3.39202	4.77578
LTR19A		2.75993	1.81578	2.46043	3.06535	4.95001	3.63757	3.56459	2.67692	6.91436	10.1052	3.59415	3.16384	6.99245	10.3893	7.05395	6.71856	10.9832	9.97408		8.88848	8.83852	4.17292	9.23025	7.04903	6.54966
LTR19B		0.721781	1.0527	1.10919	1.66497	1.88275	1.15665	1.51726	1.03226	1.89533	6.57429	1.62707	1.46912	2.74295	3.46655	3.09746	2.36833	4.72674	3.31926		3.50228	4.90072	2.00686	3.97695	2.49296	3.05312
LTR19C		0	0	0	0.491904	0	0	0.599071	0	0.778625	3.40515	0.464662	0.520428	2.38262	1.35082	1.27707	1.04751	1.94979	1.82202		0.673622	0.656306	0	0.780673	0	0.909778
LTR1A1		4.38937	5.92793	5.48312	9.67047	10.9197	4.57596	6.39283	3.47633	10.4656	26.3256	4.31835	3.80534	4.35408	4.28674	4.39347	4.39565	8.16019	5.65771		4.16667	3.52152	2.67262	4.81336	4.00635	3.80958
LTR1A2		4.42422	4.7715	4.28838	8.30357	7.70551	6.62105	10.0137	11.6391	13.2072	54.1449	13.1115	11.9791	13.4772	12.5461	12.6797	12.8104	22.7017	15.7538		14.9772	15.061	11.923	18.2121	15.8088	16.6263
LTR1B		1.16382	1.52496	1.01992	1.34808	2.16819	1.32428	1.12894	1.85019	5.06953	20.5866	2.19971	1.62328	2.90074	2.08532	2.41265	2.41088	5.13967	3.56342		2.65053	2.89098	3.79193	5.43065	3.28477	3.49632
LTR1B0		0	0	0	0	0	0	0	0.684296	0	5.51018	0.62873	0.707629	3.5892	6.27978	6.18318	5.92422	8.51727	6.583		5.12118	7.78116	8.09649	6.15055	5.97912	6.75051
LTR1B1		0.753798	0.89442	0.57972	1.39877	1.47668	1.2237	1.4775	1.10828	2.53834	9.19264	1.10185	1.36974	0.729194	1.27757	1.92619	1.00611	3.36972	2.07752		2.35254	3.50656	3.01808	3.46533	4.33294	3.45086
LTR1C		0	0	0	0.457085	0.477761	0	0.780466	0.722882	0.971412	2.99799	0.853788	0.904053	0.550641	0.815464	0.445922	0.6476	1.5867	1.11945		1.56133	1.30875	1.29015	1.00068	1.38091	1.26138
LTR1C1		0	0	0	0.462232	0.548809	0	0.811624	0	0.778544	3.11711	0	0	0	0.517198	0.617635	0.559173	0.707151	1.19142		1.3015	1.0669	0.479074	1.40696	0.537359	0.546379
LTR1C3		0	0	0	0	0	0	0	0	0.513303	2.32143	0	0	0	0	0	0	0.671766	0		0.50409	0	0	0.508815	0	0
LTR1D		2.81948	2.14904	1.73629	4.18543	4.00126	3.87225	4.70805	3.50925	6.78471	22.8792	3.71159	3.78055	3.87372	3.67155	4.5974	4.3047	10.4841	6.28607		5.17542	8.17184	5.39591	9.28959	7.48295	8.11351
LTR1D1		1.7112	1.91225	1.46957	2.95376	2.72201	3.13468	3.40901	2.84009	5.86088	21.1095	4.07953	3.44218	6.10147	3.97191	3.74716	4.16377	8.84902	5.60542		5.19955	4.04349	2.82795	4.93575	4.15303	5.86409
LTR1E		0.912367	0.731696	0.617404	1.55053	1.88821	0.821387	1.09669	1.10198	3.97128	18.8632	1.85478	1.5587	2.86675	1.89402	2.23375	1.59166	7.05105	3.60569		2.06411	1.65943	1.0978	3.55124	1.69578	1.91602
LTR1F		0	0	0	0.76003	0.511322	0	0.530221	0	1.72347	8.14152	0.894476	0.557223	1.26258	1.57426	1.02995	0.716142	1.78371	1.66274		1.06955	0.636344	0	2.24894	0.515554	1.09491
LTR1F1		0.563563	0.461851	0	1.15841	1.05259	0.821387	1.02445	0.706607	3.27334	12.9682	1.24519	1.27709	1.25872	0.749362	0.686824	0.901348	1.6749	1.08158		1.09093	1.73089	1.79084	1.8857	1.49431	1.89118
LTR1F2		0	0	0	0.619647	0.442498	0.620231	0.64769	0.556501	1.93089	7.587	0.631452	0	1.62303	0.931265	0.761615	0.814658	1.93262	1.33867		1.03364	1.5869	0.588337	1.44559	0.828325	1.07988
LTR2		9.7581	11.583	11.2098	16.2782	15.2177	19.5715	18.3331	9.36142	29.4268	30.7441	17.3916	15.8999	16.7889	18.3237	16.9829	16.4994	27.1132	22.6617		26.7882	26.9152	25.7668	33.5522	27.2806	28.3909
LTR21A		1.42709	2.13757	1.62012	2.49057	3.08532	1.89422	1.42084	0.587525	2.12506	2.68489	1.16443	0.98738	2.57195	3.11012	3.11489	3.47102	5.37907	4.19237		2.81625	2.12864	0.979697	4.124	2.256	1.97482
LTR21B		0	0	0	0.520488	0	0	0	0	0.536346	0.819895	0	0	0	0	0	0	0.490737	0		0.54245	0.417127	0	0	0	0
LTR21C		0	0	0	0	0	0	0	0	0	0	0	0	0	0	0	0	0	0		0	0	0	0	0	0
LTR22		0.873504	2.23264	2.02208	0.959413	1.11151	0.620231	0.678025	0.675288	0.586838	2.24566	0.648564	0.450324	1.43779	2.30295	1.98481	1.46476	2.02039	2.03801		1.72768	0.758488	0.430408	1.16539	0.791528	0.773137
LTR22A		0.637535	0.721066	0.555735	1.17922	1.16289	0.787861	0.578941	0.654459	1.15377	4.9652	0.891996	0.583325	4.46545	3.47966	2.97676	3.38193	4.36168	3.99049		3.3775	1.64758	1.15853	1.39999	1.28134	1.53662
LTR22B		0.664701	0.655465	0	1.37841	1.06661	0.989017	1.49079	0.695104	2.42961	3.22256	1.35347	1.32771	2.02405	1.48161	1.45597	1.3302	2.66388	2.10131		1.04254	0.593379	0	0.788578	0.612723	0.935134
LTR22B1		0	0	0	1.01174	0.526609	0.854913	1.8927	0.87905	2.11509	3.55541	1.42897	0.730877	1.84119	1.60477	1.49617	0.965783	2.58056	1.82251		1.94454	1.63619	0.976454	2.00189	1.24337	1.41558
LTR22B2		0.939636	1.66513	1.06519	1.50789	1.07797	1.2237	0.783324	0.501038	1.16004	1.76155	0.994975	1.07463	1.85507	2.06131	2.36764	2.47777	3.9661	3.21549		2.45345	1.78322	1.38232	2.18469	1.5231	1.5418
LTR22C		0	0	0.435607	0	0	0	0	0	0.586743	0.72046	0.453905	0.474847	0.806489	0.962348	0.866018	0.867146	1.28378	1.1279		0.794191	0.785654	1.03907	0.928374	0.915912	1.2139
LTR22C0		0	0	0	0.492443	0.496466	0.519653	0	0.405813	0.75579	1.88441	0.578071	0.559216	1.71462	1.04825	1.04458	1.06864	2.16245	1.64193		1.19793	0.678931	0.720301	2.98995	1.83575	1.22651
LTR22C2		0	0	0	0	0	0	0	0	0	1.94609	0	0	1.56196	1.32682	1.25522	1.44407	2.02592	1.29439		0.982781	0.53916	0	0	0	0
LTR22E		0	0.424042	0	0	0.592	0	0.442308	0	0.415998	2.58741	0.466654	0	0.946281	0.440716	0.503448	0.67952	1.25201	0.9344		0.545762	0.569968	0	0	0	0.474178
LTR23		3.39443	2.60413	2.45058	3.91394	4.46828	3.06763	4.24388	2.52741	5.20149	12.1278	4.05609	3.11358	11.6611	10.4612	8.93898	7.08043	15.3431	11.71		7.96435	7.25599	5.13325	6.91996	7.16731	8.1236
LTR23-int		0	0.616676	0	0.877472	0.454373	0.737572	0.583499	0.415847	1.13815	2.34316	1.02341	0.962734	1.57642	3.06131	2.27532	2.0554	4.42611	3.68692		2.34966	1.79105	1.39469	1.71342	1.52619	2.42196
LTR24		2.19921	3.58913	2.88252	5.26637	6.1234	5.64913	7.8942	4.18047	6.53198	9.51346	6.10588	5.4667	9.43909	14.4272	9.2878	8.2293	11.1956	10.748		8.56694	9.03675	9.7924	10.7669	8.14091	8.7128
LTR24B		2.29614	2.62449	2.45804	3.77535	5.02258	5.21329	6.23481	3.74534	13.3555	10.5857	6.70733	7.1788	12.7867	16.7805	11.1454	9.66534	14.332	13.1196		12.7967	11.8569	13.5557	26.6128	17.3043	16.3097
LTR24C		0.748458	0.981423	0.829061	1.25378	1.50679	0.888439	1.36131	1.01543	3.05673	6.63709	2.37895	1.17271	5.5387	5.60383	3.94793	3.87444	8.50922	6.70679		4.50744	5.68921	2.8911	6.31674	3.39459	4.00544
LTR25		3.86376	1.91641	1.27522	2.9027	2.3768	3.23559	4.14024	1.50703	4.0256	6.67348	2.61139	3.04245	5.60963	7.10669	6.4093	4.88704	5.01934	6.27178		5.17404	5.48379	3.7635	6.63936	4.8974	4.78606
LTR25-int		5.24715	6.10537	4.49549	6.50938	7.95627	4.55417	6.66568	4.98428	11.1143	31.0059	9.01605	7.51039	19.4315	22.9456	19.02	17.0551	26.4682	23.992		17.2119	14.6409	11.5609	14.8801	12.2305	14.4039
LTR26		1.33683	2.07088	1.56827	3.72031	4.23994	3.20173	4.05584	3.19976	5.58851	16.0818	4.56645	4.3833	5.72567	8.63922	5.60692	5.74287	10.1183	8.02499		11.8575	8.58124	6.25958	8.80783	7.10649	8.11467
LTR26B		0.428708	0.470582	0.59635	0.879241	1.00623	1.15665	1.43882	0.657942	1.92909	4.34496	1.99827	1.78924	1.84775	1.33565	1.32664	1.14027	2.14511	1.67794		1.62698	2.1087	2.31648	2.76168	2.38208	3.19045
LTR26C		0.869874	0.623899	0.584444	1.09268	1.43333	1.9948	2.45181	2.0114	4.19953	9.9625	1.77695	1.26412	1.86681	1.55178	1.57159	1.54084	2.97073	2.34805		2.23395	2.69812	1.95593	2.69155	2.09776	2.48336
LTR26D		1.94173	1.55885	1.20645	1.25929	1.69412	1.59181	1.96129	1.42689	3.38838	7.90419	2.73983	1.96467	2.84326	2.63406	2.42884	1.86609	2.8683	2.65899		2.37751	1.82164	1.83319	3.01919	2.53216	2.80313
LTR26E		0	0	0	0.596173	0.819722	0.989017	1.41368	0.815226	1.75494	4.01696	0.850379	0.797098	1.5119	1.48929	1.02696	1.10186	2.01428	1.76167		1.97425	1.94309	1.45296	2.37139	1.3599	1.4889
LTR27		1.18559	0.904261	0.991358	1.59351	1.61837	1.15665	1.57779	1.55764	3.69287	12.6086	2.15337	1.62809	3.31128	2.07999	2.26718	1.73667	4.89716	3.52848		2.31338	3.00295	1.80081	2.07558	2.31656	2.71068
LTR2752		1.15491	0.679746	0.789879	1.93733	1.75395	1.62601	1.79897	1.50008	2.99784	23.0927	2.09478	2.24105	2.80934	1.9857	1.96765	2.50253	5.9795	3.31786		2.1204	1.67041	2.9474	8.62642	3.3328	2.70268
LTR27B		1.8572	3.64491	4.56076	4.60592	7.83674	3.9393	3.49299	2.46642	2.7647	6.83013	3.11498	3.45895	3.03927	5.24762	4.54098	6.66279	7.95041	6.12419		6.52981	4.48812	3.45482	4.08102	4.42336	5.73043
LTR27C		0	0	0.423261	0.680808	0.715202	0	0.527159	0.450044	1.33105	4.93761	1.00784	0.536333	1.83986	2.51607	1.74854	2.19515	4.60646	3.04454		2.04327	1.38278	2.03073	2.169	1.90427	1.74384
LTR27D		0	0	0	0.496869	0.644351	0.586705	1.13776	1.43378	2.16992	7.92653	1.56025	1.25561	1.19144	0.587054	0.90468	0.722955	1.18499	1.15141		0.975427	1.43227	1.08383	1.71351	1.53826	1.94785
LTR27E		1.4062	1.35923	1.16968	2.53179	2.49044	1.76011	1.75555	1.37121	3.6113	13.4464	2.53437	1.42046	3.26873	2.79939	2.7596	2.70702	5.88105	3.6685		2.92028	2.2786	1.87442	2.70093	2.18	2.5703
LTR28		0.506896	0	0	0.4474	0.60005	0	0.53026	0.794224	1.07462	8.77281	1.31098	0.984183	1.14721	0.938672	0.715987	0.859076	1.7348	1.4446		0.690667	0.815941	0.616261	1.11785	0.80202	1.33327
LTR28B		1.01436	0.61271	0.400549	1.45169	1.36317	1.32428	1.59484	1.53034	3.4816	17.477	2.47932	1.85816	3.12239	2.66764	1.92534	1.82455	3.90606	3.3367		2.37976	3.98442	2.82262	3.38775	3.30865	3.56909
LTR28C		1.98657	2.43418	2.39518	2.55368	3.24467	1.59248	2.39192	1.80371	3.58424	16.6137	2.61249	2.44864	8.58384	5.76987	5.77062	5.19087	9.1653	6.36908		4.15095	2.27963	1.74459	3.91027	3.28402	3.57369
LTR29		1.77124	3.01528	4.21983	3.64134	4.22335	3.07936	12.5898	29.1564	54.3423	16.681	15.3082	7.90261	9.37666	9.3205	9.7715	12.5869	17.6003	14.6003		15.0966	12.8525	11.0077	11.5975	15.9979	15.7631
LTR2B		5.6693	7.80416	7.55072	10.1731	11.1702	8.39222	6.71124	3.52403	7.28671	11.3566	5.44621	4.91998	4.01965	9.75636	5.87301	6.8996	12.1441	10.5811		11.5366	9.80325	6.42695	15.3627	11.1219	8.57568
LTR2C		3.67516	7.95973	7.12685	8.7817	9.3838	6.72297	8.93126	6.36093	7.10104	7.76615	7.51287	5.44563	7.08015	13.7774	9.59077	10.5212	15.3966	13.377		15.1092	14.7701	14.9002	12.1826	12.0879	11.4529
LTR3		0.868825	1.10833	1.14398	1.09897	1.35308	0	0.933115	0.676628	0.613876	2.02027	0.873074	0.897971	1.47597	1.0151	1.73933	1.56238	1.85928	1.54928		0.852661	0.954763	0.888352	0.731226	0.735392	1.08519
LTR30		1.11763	0.540238	0.447195	0.609173	0.552181	1.79364	0.777779	0.728693	1.94758	6.41275	1.37554	1.11069	0.725682	0.995571	0.700913	0.569417	0.679902	0.713532		2.48078	1.27349	1.36062	2.12426	1.74484	1.98092
LTR31		1.29184	3.31151	2.48331	4.88376	3.9873	2.49769	2.60759	2.23861	4.41315	11.3071	3.74886	3.04304	5.77198	7.60064	7.02071	5.42106	11.8759	8.99478		5.29271	4.7693	3.2379	5.04267	4.3859	5.08604
LTR32		3.68855	3.87565	3.3825	6.69341	7.9904	6.72196	6.11256	6.36145	14.3321	32.6758	10.1883	7.5372	12.413	10.6062	9.81778	10.1561	20.2389	17.1723		14.171	14.0487	10.9706	14.4265	12.278	14.3598
LTR33		28.4783	46.4099	41.4889	62.3504	73.7959	51.1969	62.0634	49.0475	81.3051	257.653	69.5515	64.5438	119.381	105.804	101.543	105.609	179.484	145.719		118.411	107.212	88.6208	111.942	98.3386	116.076
LTR33A		4.16656	5.82314	4.48525	7.21951	8.68063	5.31353	7.44106	6.58254	13.948	47.7745	10.1723	7.91985	17.7356	15.0608	15.3987	13.3245	26.2635	20.1088		16.5248	18.0447	11.2082	17.2652	13.1221	15.9766
LTR33A_		3.34358	5.81934	4.90124	7.24882	10.0333	7.00693	7.36348	6.02679	11.0405	46.925	9.59458	7.59577	28.8688	42.9784	38.8914	39.5412	58.3899	51.6199		57.5579	52.296	85.0478	54.578	53.0941	64.7872
LTR33B		3.80579	4.19211	3.18448	5.59333	7.79615	4.28127	5.52698	4.99358	7.46718	27.5416	6.12618	5.67995	16.6085	20.5029	20.9928	18.2072	38.2057	26.7048		19.0785	19.982	16.2659	18.2642	16.1997	18.641
LTR33C		4.27902	6.37235	5.90711	6.32204	6.92609	4.3919	5.2878	4.10408	5.8276	26.4942	5.4639	5.25587	8.05129	8.6156	7.82936	9.6036	14.0429	10.9882		9.19061	7.77394	5.76354	11.174	7.22722	8.11333
LTR34		0.96778	1.70506	1.19969	2.11061	2.35211	2.16243	2.29321	2.18428	6.31775	9.37408	3.00231	2.62878	4.62746	4.55604	3.53612	3.42876	6.99898	6.34804		5.78158	4.54953	6.32779	4.96054	4.5063	7.36833
LTR35		1.02123	1.41246	1.05978	2.43167	2.14271	1.50867	1.49236	1.2525	1.87267	4.45262	1.75705	1.33851	2.67357	3.81197	2.93326	2.20498	5.1167	3.15797		2.78608	2.15171	1.79667	3.49568	2.64437	2.55669
LTR35A		0	0	0	1.02049	0	0	0	0	0.713228	1.8246	0.412903	0.412511	3.19876	3.27506	2.40275	1.95572	4.48911	3.90155		2.98651	4.36984	3.79691	3.44167	4.06129	3.97363
LTR35B		0	0.773375	0.40594	1.19399	0.843546	1.05607	1.12059	0.744768	1.23584	5.65327	1.24356	1.21679	1.90924	1.98441	1.76963	1.81252	2.71169	2.76018		2.26299	2.99856	1.62201	2.69409	2.42816	2.85709
LTR36		1.02647	1.35828	1.23961	2.4568	2.26831	2.06151	2.93226	3.2383	5.46646	18.9239	5.17239	4.39455	5.98744	5.26715	5.79814	4.49215	10.1094	7.46427		5.82762	6.69494	3.61683	5.63052	5.89056	7.84773
LTR37-int		4.36585	6.0867	5.36039	7.89561	9.3025	8.09653	8.68908	6.46582	10.6961	27.7116	10.3815	8.27023	20.9019	24.5183	17.1264	13.4789	29.602	24.1392		11.9591	16.4567	10.878	14.4798	14.5032	16.5206
LTR37A		3.06683	5.14834	5.13911	4.79199	7.98078	5.71585	8.78931	8.48838	16.5385	25.2442	12.0447	8.99402	14.8306	16.5964	12.9815	14.8852	25.4341	19.9124		14.4766	21.2012	19.7569	36.0689	24.8922	23.73
LTR37B		2.65606	3.7466	3.23928	4.85456	6.70139	3.33584	5.17502	4.27125	8.58105	25.4304	6.20055	4.90923	25.0472	29.6222	23.6838	21.95	34.6881	28.7771		18.7874	23.7668	16.2365	29.2835	24.9446	24.4134
LTR38		0.621146	0.909995	0.530855	0.939392	1.13196	0.653757	0.931192	0.768279	2.47761	5.74298	1.60005	1.31824	2.12131	1.97608	1.96423	2.63099	4.70227	3.17882		2.8973	3.39156	1.45829	2.79907	3.23566	3.17288
LTR38-int		0.600413	0	0	0	0	0.486127	0	0	0.772494	3.90814	0	0	2.10031	0.769168	0.6888	0.68531	0.864011	0.933391		0.587546	0	0	0.569294	0	0.455042
LTR38A1		0.461612	0.60488	0.511982	1.50769	1.24944	0.821387	1.2314	0.703209	1.22284	4.24678	1.07686	1.04455	1.74431	2.97993	2.12175	2.01735	4.56022	3.2189		2.30325	1.76896	1.80149	3.85192	1.89123	2.22626
LTR38B		0.550271	0.729349	0.831444	1.0302	1.5481	2.02832	2.02233	1.9048	3.7317	8.37036	2.37814	2.27756	1.75783	1.54801	1.25044	1.6291	2.72233	2.00413		2.13086	3.16226	3.20315	3.14661	2.91948	3.2752
LTR38C		1.50602	1.37289	1.99776	3.22454	2.92896	3.20173	4.52142	2.16369	3.33324	7.63293	5.68079	3.14263	3.5761	3.23588	2.8166	2.73851	4.69516	4.08763		3.87121	7.32267	7.87915	2.80337	4.28691	5.15139
LTR39		4.3501	5.5267	4.52535	7.41964	9.4787	5.31387	9.06179	6.89966	13.3198	39.9246	10.3266	9.3952	38.2774	23.3384	24.1125	29.2595	40.8775	31.7642		72.2628	83.9129	33.3258	27.3426	32.8936	50.8528
LTR39-int		0.403051	0	0	0.488018	0.604438	0.452601	0	0	0	3.6933	0.624871	0	2.12853	1.78948	1.32135	1.33729	2.59045	1.8368		1.12977	0.836893	0	0.583773	0.843178	0.950453
LTR3A		1.86868	1.83674	1.4162	3.23154	2.71296	1.48352	2.63708	1.56891	3.02659	5.81751	2.27325	1.15321	9.71416	10.2337	9.21979	7.66598	9.70967	8.29892		6.8037	5.37218	4.79407	4.96152	5.55906	4.54568
LTR3B		0	0	0	0.493206	0.748224	1.02254	1.50622	1.81099	1.02927	2.95543	1.69207	1.24229	0.610042	1.05761	0.708174	0.696838	1.66426	1.26146		1.72194	2.38435	2.23743	2.39038	1.91126	2.13996
LTR3B_		0.853247	0.75345	0	1.07724	1.22267	1.29075	0.963144	0.968535	2.2166	6.59056	1.21735	1.00372	4.64756	3.49253	3.41766	2.28807	4.52926	3.22623		2.62381	1.92553	1.23189	2.27798	1.67054	2.04943
LTR4		0	0	0	0.580037	0	0	0	0	1.41186	3.29494	0.427275	0.706705	0.972837	1.01707	0.873359	0.791325	1.75921	1.49302		1.22714	1.11095	1.0184	0.933848	1.51953	1.30251
LTR40a		6.25554	7.42476	5.62794	11.1173	10.69	6.42023	7.88491	8.00844	13.6151	40.2458	10.1739	9.88552	24.8525	19.8501	18.9566	19.8475	38.8334	25.1485		16.3767	15.5631	12.4733	20.1707	14.0975	16.4961
LTR40A1		0.927203	1.00322	0.731026	0.718975	1.15747	0.519653	1.15787	0.778513	2.78897	8.60363	1.55818	0.951024	4.01396	2.84361	2.57777	2.82521	5.75326	3.91763		2.53159	2.43358	1.17128	2.92015	2.22331	2.22235
LTR40b		4.61162	6.70149	5.49752	7.27965	8.21269	6.18554	4.9521	4.45295	6.39449	25.5743	6.51719	6.68532	18.1046	17.1145	15.7354	16.879	25.2109	21.2274		14.1982	12.2082	7.77057	12.6483	10.1993	13.4235
LTR40c		2.27093	3.91182	3.19982	4.80435	5.50068	4.30809	4.83923	3.45456	6.71147	20.1068	5.23108	5.25759	18.0966	10.4295	11.0488	12.274	18.1648	16.05		9.13326	7.98936	6.65965	9.59841	7.70419	9.85421
LTR41		7.41129	7.25689	6.47338	12.1474	13.2082	10.5758	10.6006	9.37193	16.9433	42.1065	15.7462	14.4684	34.7738	26.4894	24.345	22.3224	39.2276	32.0764		22.6592	17.8664	17.4297	32.7658	19.1819	21.1907
LTR41B		8.31688	8.05596	7.22789	10.3454	10.319	6.64921	8.03593	7.46059	8.88079	36.2246	10.2755	8.38958	18.1708	17.6217	18.2922	15.6795	32.4234	21.5792		17.293	11.2549	8.00935	10.4263	10.3044	13.098
LTR41C		3.47653	3.95104	2.59352	4.40658	4.38067	3.12932	4.5611	4.82302	9.54997	26.7447	8.07008	7.36948	19.8699	21.3204	16.6369	17.4374	25.1958	22.7695		13.6124	13.8335	10.771	18.1798	13.5577	15.352
LTR42		4.38793	8.7229	6.19889	8.00398	8.11073	6.85606	6.697	5.53393	10.8742	17.3293	7.81327	8.89072	18.4728	17.9554	19.9224	23.3848	31.0467	25.3235		21.208	19.6197	16.9486	21.253	18.7671	23.4313
LTR43		3.39454	5.01198	4.63494	5.74943	7.77188	5.74971	6.97496	4.17438	7.84986	15.5574	5.90087	6.44367	17.0048	16.7673	13.4265	13.383	16.1251	15.1494		12.0364	12.1178	9.76606	17.8031	13.5286	13.3881
LTR43-int		0.723633	0.440298	0.442847	1.86896	1.85833	1.49191	1.06366	0.853747	1.4567	7.85777	1.50284	1.67866	6.63465	2.5011	2.58718	3.14449	3.20488	4.21999		3.38481	2.24019	1.64558	2.01976	2.39626	2.93606
LTR43B		0.59673	0.58213	0.600686	0.720978	1.28847	0.854913	1.20289	0.873456	1.72533	5.61844	1.4445	1.21301	1.84982	1.51783	1.11407	1.1926	2.74268	1.42898		0.931809	1.03448	0.766701	1.40024	0.92362	1.27328
LTR44		1.13561	2.29912	1.58593	1.70569	2.11365	1.52543	1.76737	0.938519	1.57713	5.2596	1.70233	1.69962	5.24314	7.49057	5.83566	6.5973	8.45351	7.89979		5.96291	3.98923	2.20236	3.08412	2.63387	3.70056
LTR45		0.418487	0.468445	0.653822	0.718669	1.17667	1.2237	1.31439	0.711555	1.55543	4.90046	1.12365	0.869667	1.47454	1.13516	1.14241	0.99486	2.09897	1.71479		1.83514	2.35041	1.78407	1.36132	1.32265	1.33852
LTR45B		2.07871	2.12734	1.72718	3.43707	4.66565	3.60404	2.99171	1.82763	4.10878	14.0425	3.69118	3.07486	5.08435	5.62114	4.83443	3.84162	6.01701	5.21266		4.88792	4.34653	1.9692	6.57955	4.51888	4.22843
LTR45C		2.59752	2.91061	2.91395	4.28388	5.77929	6.04004	5.47895	3.66235	9.33709	12.8789	4.31819	4.37777	9.73757	6.50957	6.14807	6.20916	12.205	9.96545		7.61148	7.06074	4.57904	7.31346	5.30277	6.11896
LTR46		3.56967	5.00674	3.501	3.61007	4.84519	2.80545	3.05414	2.73773	4.96824	8.82548	3.8496	3.51845	8.23735	10.4707	9.30708	7.63901	10.8148	9.51329		7.68742	7.53586	4.95485	4.9528	6.49105	7.69462
LTR46-int		0.794862	2.00646	0.913716	3.92341	3.60532	4.88474	2.62696	1.63307	1.62282	10.425	2.78788	2.48371	7.61347	6.36618	6.02137	6.62638	11.1594	9.15807		4.9148	3.46403	1.50773	2.54756	2.67902	4.5307
LTR47A		3.35674	3.56617	3.28745	4.86006	5.61213	3.00058	4.71544	2.7895	5.64193	14.2186	4.711	3.98975	12.9724	18.9343	12.3158	10.1411	18.819	14.7585		12.2592	11.1319	8.22364	16.6304	9.06254	9.91969
LTR47A2		1.82373	3.85377	2.60547	2.57418	2.98004	2.33006	1.25778	1.06156	2.2448	4.35066	1.79416	1.74482	5.93373	6.24388	5.6683	4.87699	9.50168	6.31394		4.73604	3.4362	2.48771	2.56036	2.56836	2.92449
LTR47B		0	0	0	0	0	0	0	0	0.641237	1.11314	0	0	0.781248	1.17987	1.36538	0.825237	1.89942	0.976769		0.632595	0.481433	0	0	0	0
LTR47B2		2.90355	4.86763	4.30473	4.66378	6.04981	5.90594	7.96752	6.38611	9.24444	10.1849	8.04484	7.05503	2.6045	4.10198	3.56307	3.78419	5.77377	5.42398		5.24153	7.09246	6.63635	5.45541	5.85716	6.80111
LTR47B3		0	0.677962	0.687145	1.30611	1.34236	1.32428	1.30751	0.44944	1.52541	2.52856	0.909196	0.972988	1.34264	3.20375	1.79389	1.67888	3.91744	2.5508		2.15961	2.07133	2.0403	3.21021	2.10205	1.9341
LTR47B4		0.923591	0.876812	0.850974	1.39245	1.78779	1.3578	1.68081	1.59419	2.1055	4.48384	1.98658	1.88838	5.03593	5.30774	4.68535	3.55474	5.63491	4.09165		5.0496	4.72387	2.15952	4.36602	3.2914	3.24095
LTR48		4.98906	6.27996	6.48735	5.97682	9.9848	3.83873	6.989	4.86295	10.5705	25.6261	6.92154	6.03671	9.46817	10.462	11.196	11.9202	23.5993	15.1444		11.9854	12.5586	7.78534	11.0723	9.60994	10.9866
LTR48B		3.44393	4.60108	3.84583	6.4982	10.515	12.4884	23.895	31.4028	35.3262	67.2888	47.4435	34.72	13.7377	15.8612	11.8196	16.3483	22.4837	16.8103		23.9752	62.8539	86.4883	45.3843	52.5133	50.6652
LTR49		3.51927	4.76681	3.6593	5.54764	9.32795	5.11003	6.83569	5.40457	12.581	29.2663	8.94724	7.01316	23.182	24.8645	18.4049	20.4763	35.0051	26.8524		19.5942	19.4609	13.6205	22.2709	17.761	21.834
LTR49-int		7.02044	11.9108	8.80898	13.2049	17.0748	11.4743	15.6535	12.5081	21.2078	57.3997	19.2138	14.2713	26.3553	28.3503	26.6524	24.0137	53.2771	39.9906		26.1445	26.6625	21.1236	29.8554	25.5537	25.6014
LTR5		0.48172	0	0	0	0	0.455953	0.448784	0.452021	11.0876	1.0261	1.33417	0.568496	0	0	0	0	0	0		0	0	0	0	0	0
LTR5_Hs		34.4134	39.7726	43.5416	53.2623	56.8973	43.733	47.8832	36.1963	69.1575	79.217	53.9587	48.5669	62.9264	85.8827	72.1309	70.0661	83.2725	80.5668		63.9516	66.4094	70.3459	74.8752	68.2082	70.34
LTR50		7.58007	11.9332	9.92406	16.0744	21.4879	18.1878	24.708	15.4074	29.0365	81.7396	26.0026	25.4156	38.5537	43.9043	40.8649	38.7062	65.005	51.6314		42.2236	34.59	33.4795	39.3117	36.2852	47.1879
LTR51		2.32412	3.2925	2.54197	3.35741	4.3617	3.30231	3.458	1.99524	6.66108	13.575	4.12694	3.55115	4.5706	8.51878	6.55213	5.32083	9.94488	10.5309		7.71169	7.36361	5.03749	8.79511	6.43573	6.67297
LTR52		5.01597	6.16834	4.24618	6.32583	6.49251	3.75491	5.97798	4.39298	6.44944	22.2839	5.34043	4.76212	14.8985	15.966	14.7617	14.1117	20.7576	19.5093		16.6821	13.6187	13.0561	15.0079	13.6518	13.8188
LTR52-int		2.80619	3.7157	2.92431	4.94103	5.37635	5.34739	5.82383	3.23786	4.5384	11.3653	4.41354	4.24527	5.29192	3.03393	3.42795	2.91117	6.05461	4.47904		2.81562	2.1769	1.47776	1.63479	1.67918	2.56865
LTR53		3.81599	7.71196	5.69621	7.69734	8.56191	5.58208	5.58214	3.25797	6.75558	22.1623	8.18922	6.00118	12.4118	12.8243	11.6367	11.6576	23.8147	15.6739		10.1551	7.77079	10.2864	12.091	9.43497	9.77833
LTR53-int		6.61926	17.6221	9.68721	11.8503	12.6462	6.08497	7.05256	9.54459	6.47963	27.4168	9.62321	12.7757	9.24298	9.62243	11.9196	16.888	21.1873	15.0231		10.3984	8.83657	10.5302	8.97098	8.39731	11.9668
LTR53B		0.627551	0.565571	0	1.18647	1.0587	1.39099	1.20159	0.790162	1.58118	6.20625	1.45461	1.35868	2.42255	2.09497	1.92247	1.44978	3.47082	2.63123		2.38204	2.55472	1.12073	3.85556	2.40235	2.26537
LTR54		4.14377	4.30149	4.04774	6.15249	7.75873	4.30809	8.18635	6.69431	9.13742	18.8869	7.67426	6.57567	13.4406	17.5627	13.5717	13.7616	23.4732	18.447		16.3107	17.2306	9.88627	16.2305	13.33	13.5078
LTR54B		1.79393	2.76839	2.13622	4.04485	4.03914	2.1289	4.04889	2.70985	5.31385	14.0654	3.60122	3.77939	8.59795	8.85206	7.8699	7.31281	13.3441	10.2435		7.06171	8.02172	5.7727	10.4871	7.77046	7.84577
LTR55		1.10678	1.45767	1.12485	3.0307	3.51252	1.76011	2.08385	1.37983	3.77872	14.3635	2.51305	2.39472	5.53888	6.29594	7.68383	6.9115	17.4084	10.6848		8.26984	8.53491	4.72802	8.10414	7.35608	7.65928
LTR56		5.0116	6.42972	5.03799	6.92892	7.75988	4.60982	6.22248	5.60001	9.60418	24.3132	7.21445	6.50673	15.6171	14.6938	13.1978	12.8111	24.7394	17.4371		12.3403	11.2479	6.34898	12.1008	10.1107	12.4031
LTR57		1.32035	1.46569	1.20415	2.63803	1.89083	1.05607	0.565315	0.837757	1.57794	5.3118	0.901984	1.0608	9.71013	8.62368	6.76607	6.67699	9.68102	9.91393		4.76886	4.15794	2.07086	3.20226	2.88163	3.31659
LTR57-int		7.40792	21.9263	16.5893	6.64546	9.15821	2.59826	4.72338	9.20784	3.02924	13.71	6.46138	9.71032	12.8501	7.96102	9.07733	13.8988	12.6194	9.86091		6.08983	3.85005	1.8274	2.60234	3.30087	5.75601
LTR58		0	0	0	0	0	0.787861	0.624014	0.925317	0.829868	2.87425	1.08948	0.603781	0.534935	0.610164	0.459646	0.46427	1.23003	0.650845		1.21759	0.937656	1.09932	0.83857	0.63379	1.14551
LTR59		0	0	0	0	0.400404	0	0.409128	0	0.56472	2.01805	0	0	0.739157	0.863603	0.590663	0.455613	1.02714	0.615931		0.513106	0.606066	0	0.492332	0	0.529234
LTR5A		24.1151	43.4543	50.4471	55.8806	66.1288	45.4985	55.3869	39.1374	50.833	57.5008	48.3023	46.8685	30.7599	71.6868	58.087	65.6473	79.9879	79.7696		61.2876	77.0581	64.5935	87.9782	77.4961	73.6043
LTR5B		13.269	20.1103	16.5904	37.2414	36.6273	26.6656	31.4071	16.9516	33.7879	50.2587	27.9998	32.8498	52.5746	81.689	60.1572	62.8029	79.4051	72.9037		58.4377	62.2643	51.6772	64.4999	56.0371	60.1654
LTR60		0	0	0	0.678798	0.458997	0	0	0	0	0.591929	0.522172	0	1.62599	1.28914	0.917164	1.52607	1.71474	1.60906		0.775309	0	0	0	0	0
LTR60B		1.40102	1.33253	1.35264	1.80317	2.23792	1.41748	1.23168	1.20168	2.65145	7.14013	2.23163	1.80276	4.81341	3.43825	3.62787	4.1085	6.99037	5.46179		3.96585	3.76498	2.05201	3.61624	3.21568	4.4386
LTR61		2.29438	3.77657	2.97533	4.55952	4.95216	3.63723	4.56363	2.92992	4.83993	6.82397	6.11376	6.21728	6.46485	11.5319	6.52878	8.34639	9.00523	10.1893		9.02161	10.6908	8.85348	13.0855	11.5622	12.7266
LTR62		1.71427	2.18231	2.3719	5.82945	5.10711	3.53699	4.30399	2.33537	4.98447	11.465	4.3439	3.43765	9.13813	10.7658	7.88279	8.88411	11.8769	10.5525		7.42454	10.1826	7.5702	9.77889	7.93796	7.62869
LTR64		2.40204	4.526	3.44362	3.77544	4.36338	1.96127	2.56052	2.51721	4.59876	10.7133	3.96243	3.54666	7.4794	8.17438	7.04853	7.36684	10.0199	9.21704		6.75391	8.47763	5.21314	8.27637	6.24453	7.52871
LTR65		2.42735	2.44896	1.93995	3.68096	3.53609	2.96671	3.67129	1.83559	5.69846	11.3497	4.50792	4.91233	10.2126	8.23571	7.87404	7.38749	12.286	10.3699		6.1771	8.69238	3.25221	8.42864	6.25403	7.92893
LTR66		1.11406	0.825573	0.795462	1.53764	2.11962	3.06763	3.61988	2.05742	3.37946	7.3006	2.97994	2.45636	3.622	6.19404	4.72376	5.2166	7.01623	6.06817		7.40388	6.34253	7.08587	5.5687	6.49926	6.39815
LTR67B		17.5844	21.5565	19.0796	26.2992	33.2603	21.0151	24.7435	18.7997	29.6418	78.9648	26.9028	24.1069	53.0911	52.6824	48.9406	48.3601	80.661	66.4989		51.3445	47.2052	36.0319	45.3537	43.62	49.7351
LTR68		1.40062	3.58846	2.38516	2.49194	3.55059	1.55896	1.73121	2.0335	2.05091	7.34667	2.09205	1.66216	3.617	2.89299	2.97314	4.00981	5.80829	5.02943		3.11877	2.6283	2.64241	2.79298	2.14791	3.45808
LTR69		0.702929	0	0	0.549828	0.87205	0	0.631344	0.628483	1.14043	4.96434	0.900603	0.726974	1.4381	0.600858	0.773601	1.08521	1.46793	1.32997		1.1893	1.09564	1.1665	1.02798	1.21086	1.25425
LTR6A		3.22439	7.21784	5.73113	8.83614	13.2064	21.8184	38.8291	17.3717	27.3107	36.1603	28.3075	26.1335	34.2076	34.3184	35.4298	36.1318	44.3788	37.7991		79.0481	67.2602	90.6356	56.9268	62.979	65.8977
LTR6B		1.28186	1.27227	1.12317	1.74762	2.29093	2.21238	1.98391	0.960292	4.81836	5.15865	2.20437	1.91438	3.30824	4.82413	3.10406	3.26732	5.36042	4.88825		3.33657	5.21735	3.8051	6.76622	4.52441	3.87702
LTR7		3.34211	3.19684	2.64011	5.36042	6.54993	5.13886	10.4469	4.96605	17.7238	24.9323	7.9318	6.28478	14.7967	16.2432	13.5526	12.1808	16.8826	16.831		14.9745	17.3351	15.472	21.0286	16.4192	15.6779
LTR70		12.1465	9.89859	7.87208	8.52001	7.26515	4.74393	4.74239	2.51676	5.09304	8.10799	3.38266	2.8678	32.8849	31.5604	20.8251	15.5768	21.2249	17.3923		8.27507	8.84398	4.63484	8.51212	6.33769	5.27141
LTR71A		1.44629	2.41296	2.15265	2.92761	2.89996	0.955491	1.63942	1.2676	2.48742	4.26387	1.82345	1.69154	1.8305	1.22901	1.06137	0.981449	2.24358	1.74074		1.03212	1.45927	1.0165	2.36241	1.38708	1.69325
LTR71B		0.969756	1.61469	1.43565	3.51514	5.36561	7.96276	4.10909	2.22291	4.23654	10.661	4.11254	4.05182	4.66467	7.02018	4.73601	4.83139	8.19413	7.49796		10.0119	11.1682	8.55723	7.49818	10.5063	9.85656
LTR72		2.17608	1.86061	1.80581	2.80872	4.20173	4.27456	6.1375	5.60831	7.93445	9.62557	7.56919	7.64343	4.58506	5.07495	3.57671	3.92487	6.40949	5.91426		6.21808	8.03595	7.72768	8.48907	9.9626	12.4314
LTR72B		0.729949	0.794031	0.998987	3.02977	5.01668	1.82717	1.1851	1.58619	1.85917	5.31857	1.79464	2.15462	1.9672	1.43425	1.40342	1.84624	4.42366	3.93201		2.95085	2.63949	1.26345	2.46116	1.78903	2.25518
LTR73		0.805816	1.03034	0.825696	2.14524	2.30183	1.2237	1.01575	1.26655	3.4148	7.18287	2.25546	2.39684	6.57029	6.65782	5.50684	5.11586	8.87557	7.8045		5.90104	5.21515	2.7093	6.96448	5.83168	6.09166
LTR75		2.87929	4.25457	3.34533	7.14534	7.22189	4.97894	4.39896	3.23271	3.8567	13.1601	5.0124	4.22716	7.78122	9.10983	7.97357	9.12649	14.4407	13.2902		9.66536	7.38954	5.096	7.58738	6.65159	7.8675
LTR75_1		0.850065	1.38026	1.55617	1.08673	2.40267	1.69306	1.31897	1.81079	3.638	5.25672	2.80446	2.74381	1.88534	1.62756	1.90054	2.0811	3.10196	2.99448		2.58278	2.67312	3.2197	3.38857	3.98385	3.21277
LTR75B		1.39874	2.7517	1.95832	2.03328	2.95443	1.59248	2.07756	1.708	0.811991	5.745	1.38455	1.16929	1.57977	2.55035	2.95985	3.89958	4.83733	4.51742		4.37458	2.0083	2.14439	1.72262	1.42168	2.29112
LTR76		13.3867	19.8348	16.0571	14.6762	15.2401	13.407	17.5014	9.45673	16.8408	17.2808	15.4828	13.7963	13.2299	17.0554	15.0187	18.7137	17.6209	17.8994		13.8016	14.9369	16.4471	21.018	16.5933	15.1669
LTR77		1.66546	3.26176	3.53539	3.07516	3.68019	2.09537	1.56279	2.34141	1.03929	5.79969	1.74827	1.5982	0.841363	0.957586	0.992427	1.05102	3.09159	1.60889		2.12656	1.59709	0.73651	1.57443	1.26373	1.74062
LTR78		12.1638	13.7022	12.0139	19.0903	23.1541	14.9026	18.7557	18.5132	33.9695	117.59	28.264	22.8074	78.3764	102.553	104.627	105.582	182.358	120.945		109.757	75.3558	66.6734	76.232	65.6439	79.8496
LTR78B		5.54714	6.07165	4.70526	9.53118	10.8052	5.97333	9.57071	9.45935	16.8368	62.7525	14.6553	11.9175	22.7067	15.6525	15.8148	16.2081	41.5128	26.8857		19.572	17.9272	14.1931	19.0884	15.9315	19.4802
LTR79		17.3337	23.503	18.2363	24.3309	30.6479	18.9439	24.6958	23.0564	33.3253	93.1926	32.0989	27.5822	54.5095	47.582	46.0664	44.4337	78.4135	60.5575		46.9698	45.3373	37.0331	44.5005	40.4925	49.2826
LTR7B		4.40286	8.29679	7.16354	15.2907	22.0938	18.3977	18.9136	9.14145	30.285	28.2684	12.445	11.2548	11.7047	18.861	16.1492	15.936	25.5646	21.8988		24.5131	24.1146	18.5092	23.3775	23.1858	19.6295
LTR7C		2.54351	2.61622	2.0961	4.68986	5.4731	5.43657	7.81227	4.30551	12.0981	16.3973	6.61747	7.48997	9.57073	14.7104	10.6896	12.2027	19.8747	15.5907		16.1483	17.845	17.166	19.1561	18.7752	18.894
LTR7Y		0	0	0.415807	0.599068	0.871086	1.15162	2.00425	1.19357	3.23569	2.97995	2.44298	1.36935	0.752853	0.764898	0.431366	0.662181	1.0903	0.913926		1.94298	4.35353	7.65864	5.03424	5.28647	4.06254
LTR8		21.3453	18.2988	15.1685	27.8612	36.5034	29.3909	30.8563	22.3042	52.1644	120.374	33.9668	31.3214	58.0852	61.83	55.3594	47.1045	89.6438	68.5576		60.4857	60.4142	41.8337	67.8648	53.2362	62.2193
LTR80A		0.893477	0.725048	0	1.35586	1.14775	0.553179	0.847413	0.866006	1.44841	4.96978	1.55019	0.745744	3.26407	2.10377	2.18735	2.0537	3.783	3.54416		1.95901	1.80956	0.916378	2.32888	1.44228	1.55064
LTR80B		0.535679	0.680123	0.693992	1.68326	1.96982	0.821387	1.49824	1.95823	1.99716	8.93354	3.05513	2.38987	3.77508	5.92289	3.76961	3.88343	7.57035	5.34613		3.46921	6.12248	2.98123	4.39397	3.87436	5.45614
LTR81		0	1.172	0.820325	0.791299	1.32244	0.921965	0.969304	0.992304	1.59619	6.3337	1.27104	1.34715	2.00072	2.16901	1.926	2.63842	4.93783	3.24717		3.10928	2.01551	1.16696	2.81441	2.69292	2.74526
LTR81A		3.13045	2.99847	2.31087	2.94911	3.45756	2.79942	3.04465	2.9689	3.86493	15.3474	3.70859	3.05694	4.2266	5.82683	5.85223	4.9539	10.9098	7.48663		6.35623	6.15129	4.05428	6.09533	4.23071	5.17589
LTR81AB		0	0	0	0.697371	0.558968	0	0.526469	0.451156	0.772052	4.42635	0.424074	0.421123	1.18046	1.13771	1.29264	1.18906	2.77293	1.72451		1.15437	0.791427	0	1.00071	0.508089	0.715343
LTR81B		9.85769	10.0101	12.7432	10.2947	14.0426	9.10231	12.64	7.36906	16.9439	28.0822	10.0894	9.35413	11.6638	18.19	17.7665	21.7328	25.2228	23.7221		22.8548	17.3273	21.4539	24.0912	17.0329	17.2842
LTR81C		0.815025	1.13979	1.01912	1.92129	2.0368	1.89422	1.82293	2.06975	3.40647	13.2052	2.68822	2.26933	2.67039	3.64774	2.49708	2.86405	4.90408	4.11303		3.97016	4.81927	2.47163	4.62014	3.40469	3.65774
LTR82A		2.67712	4.02176	2.97963	4.53031	4.96719	4.00636	5.59148	3.7921	6.36708	27.9117	6.36628	6.94095	10.2289	8.99511	7.21385	8.38256	14.4728	11.3		10.1731	7.23037	6.36086	18.7643	9.12688	10.8777
LTR82B		6.20149	2.73054	2.21164	4.77879	5.20924	3.73815	5.52469	3.89807	8.66798	25.3264	7.71043	5.80113	13.8764	8.55599	6.97831	9.07411	18.3711	11.4019		9.08188	10.9148	6.37865	13.5159	9.8412	11.4489
LTR83		2.91965	2.4054	2.3698	2.63948	3.92351	2.1289	3.63852	3.41508	3.35323	14.2237	5.47386	4.89864	7.01068	5.89404	5.39281	5.58259	8.71449	7.91078		6.05467	5.81533	4.5552	6.41205	5.69027	6.56105
LTR84a		3.63829	6.89768	5.73015	5.15096	6.64171	2.88323	3.86201	4.41266	5.23574	15.5003	5.20287	4.86083	11.3746	10.9086	10.9363	12.8542	19.0984	15.7121		10.1302	8.62577	8.06939	9.76407	9.18707	10.3074
LTR84b		3.25761	5.39421	4.42052	6.04817	7.70166	5.9341	5.75174	6.58647	10.4069	22.5263	6.97729	6.66248	13.5229	11.2946	10.419	11.4037	21.5153	17.0125		14.5139	11.7097	11.1326	13.4381	10.0962	12.0771
LTR85a		2.90275	5.30011	4.94095	4.60042	7.27191	4.67688	5.56569	6.2499	9.20532	26.2965	7.59156	7.11773	12.7812	10.5099	10.2968	12.1346	22.1608	16.1536		12.383	12.1934	8.18036	11.9481	11.8166	15.3181
LTR85b		2.0026	2.6049	2.91614	3.81332	5.66266	2.74913	3.91702	2.86896	6.79877	21.0024	5.40233	4.13732	8.41166	9.10733	7.74211	7.62163	16.6392	11.2705		9.3245	11.3881	4.80221	10.7238	7.57894	9.45588
LTR85c		4.12546	2.94959	2.27695	3.24407	3.44255	2.53121	3.25168	3.02012	8.15209	24.0911	5.45921	4.21706	7.59395	8.50146	8.25014	7.34822	14.2023	10.5215		7.43093	8.21858	6.24019	9.90686	8.10568	8.08642
LTR86A1		2.80278	2.67439	1.93078	4.5969	3.92376	1.72659	2.42456	2.18888	3.88068	13.9648	3.39651	3.01733	14.924	9.92577	11.3777	11.7618	20.1897	15.4238		9.79333	6.92198	5.63341	7.37855	6.55213	7.55008
LTR86A2		1.01814	0.906136	0.744555	2.23472	2.56462	1.34942	1.56151	1.86434	3.51237	6.80795	2.42679	1.66005	4.98204	6.18911	4.50752	3.66472	9.40257	5.55685		3.42153	5.64727	4.47192	6.97909	6.06196	4.73156
LTR86B1		0.631265	0.557493	0	1.51274	1.35804	1.89422	2.3257	1.25907	2.33401	6.76735	2.28706	1.7531	8.75025	5.80165	6.08714	7.30731	8.92988	8.07578		5.99413	4.58272	2.14741	3.12501	2.82359	4.29044
LTR86B2		0.875927	0.938909	0.607162	1.03502	0.951866	0.553179	1.11373	1.1266	1.0496	5.61879	1.05514	1.17619	2.36239	1.51127	1.47853	1.7935	3.38371	2.41726		1.83244	1.37535	1.72339	1.85248	1.95717	2.15442
LTR86C		0.56976	1.72997	1.65265	1.91612	1.97138	0.754335	1.36059	1.10954	1.43218	7.22197	1.23664	1.08543	2.79152	2.73654	2.58507	3.82329	4.31745	3.14016		2.22999	3.19404	1.82972	2.88182	2.10923	2.74888
LTR87		7.55651	9.49254	6.19664	10.8947	11.4327	6.08497	8.57002	6.56338	10.846	22.5624	8.81995	9.94153	29.6758	22.6148	23.0146	19.8982	36.2024	27.7436		17.7175	14.6417	8.09931	14.4914	12.4021	14.2688
LTR88a		3.79646	3.20019	2.98168	4.39868	3.81339	3.04517	3.29895	3.78626	4.42165	22.3238	5.36503	5.17072	6.47624	8.06729	6.70923	6.78485	10.9671	9.12878		5.35638	6.90835	5.38033	6.05699	6.79433	7.61429
LTR88b		2.77567	3.49033	2.50213	4.50431	4.43388	3.97283	4.02669	4.33254	5.66311	28.7285	5.55206	4.15694	11.6605	9.48812	9.28416	8.8112	15.3496	12.3401		8.281	7.57117	5.26481	8.41152	6.81184	8.44598
LTR88c		1.70898	1.76642	1.2853	1.73108	2.65814	2.43063	2.56717	1.90184	2.4849	13.0336	2.68784	2.76445	5.909	7.41865	6.41188	8.46481	11.4816	9.18821		8.49892	8.11153	6.21485	7.07741	6.81658	7.68249
LTR89		3.17428	4.85358	4.30326	5.23174	6.98878	2.51445	5.48421	3.2071	6.09091	19.2051	5.17216	3.95506	23.1913	22.573	17.239	17.9483	25.8819	26.1272		14.4258	13.0449	7.41708	11.8144	9.99052	11.7489
LTR89B		1.88463	2.90781	2.82887	2.85836	4.21507	1.48352	2.81956	3.29174	4.86467	11.2458	3.31967	2.78572	12.005	8.67834	8.0655	7.6408	12.0804	9.00927		6.06537	7.89636	3.94155	6.48365	4.44221	5.73079
LTR8A		12.5362	15.179	10.8024	14.6994	16.5967	14.0474	15.4973	14.2688	19.9351	53.0103	20.4964	20.5606	32.9176	31.1439	28.4006	28.5581	44.9546	38.0537		29.6573	26.9822	20.3644	26.7454	24.4661	32.1055
LTR8B		13.6093	15.4501	16.9305	26.1304	22.8047	9.90726	18.4514	20.4444	22.1854	72.7861	22.1771	21.6832	30.9017	24.2816	23.1652	24.4299	38.9365	31.8948		20.5265	21.9074	18.6767	28.8256	24.3232	30.8353
LTR9		1.81541	2.07042	1.78718	4.10821	5.62044	4.00636	3.67078	3.46322	5.59116	20.7438	4.11733	3.59362	9.52638	14.5229	13.4764	14.1825	28.6834	20.0823		18.626	19.9765	13.5468	26.8216	22.3245	23.0898
LTR90A		1.37303	1.98082	1.42468	2.39935	1.94258	1.05607	1.7353	1.30325	1.8622	4.83183	2.251	1.48323	6.089	5.86285	5.13607	4.90725	8.55572	7.71575		3.17878	2.71161	1.37926	3.83051	1.75011	2.39629
LTR90B		0.962254	0.880106	0.938311	1.2384	1.52079	0.720809	1.14273	0.983471	1.67302	6.01069	1.50685	1.10029	5.46783	8.25558	7.68507	8.47654	11.1055	10.22		7.63672	7.60868	9.02834	8.78644	7.50611	9.392
LTR91		1.83674	2.1824	1.66029	2.42823	2.8541	1.68468	2.65905	2.69423	5.80764	23.0464	3.27453	3.10674	10.2918	8.83165	9.36466	8.5051	18.2016	12.9999		15.4768	13.6437	12.4341	8.48933	12.0386	15.6638
LTR91A		3.6242	5.4113	6.04124	8.99141	9.9817	5.81676	9.21532	7.86321	12.7881	39.0013	9.73646	8.40599	15.1684	22.1201	16.1067	16.5307	32.8471	23.8342		13.575	16.5253	11.091	17.5	14.6127	15.5248
LTR9A1		2.0314	2.94193	2.0666	3.48326	4.75382	3.0341	4.00888	4.09137	6.82961	17.6452	5.97913	5.27623	6.93435	7.31216	6.62986	9.29839	13.3352	10.848		12.0938	10.3565	6.63751	11.0475	9.30267	12.4485
LTR9B		2.76069	1.8539	1.5411	4.01417	3.97382	3.16821	6.10419	1.90514	8.66773	16.7157	4.23109	2.89665	8.26503	7.07854	7.10756	6.16985	9.27084	8.69185		7.85165	8.17511	3.91106	7.90791	5.6203	5.58669
LTR9C		0	0	0	0	0	0	0	0	1.22604	3.44255	0	0	1.59531	0.964591	0.825361	0.652752	1.24526	1.26241		0.840402	0.471518	0.415174	1.01134	0.702003	0.624379
LTR9D		7.66444	7.53844	7.34643	7.40002	9.86661	3.83873	7.06201	5.63835	11.0403	27.1016	8.24138	7.26047	12.7513	14.5975	12.9307	12.7163	22.7736	17.5628		14.499	14.4379	11.0479	14.5853	13.9771	15.3553
MADE1		5.56155	10.4396	8.07857	6.88594	10.3555	5.41478	8.14946	7.90585	10.6835	31.758	11.1781	8.96944	41.9133	35.0241	31.0575	31.7429	62.0481	46.4591		22.5124	23.2963	14.4964	27.4792	20.9303	25.81
MADE2		3.29709	4.45893	3.33028	5.48703	6.14195	3.9393	5.46552	4.30882	8.08407	19.491	6.76645	6.7433	41.4534	45.5001	33.9011	38.3853	52.7357	45.9284		29.3492	37.2722	33.1732	37.008	41.245	41.9287
Mam_R4		1.22417	2.32322	2.26446	2.80135	2.64189	1.59248	1.58606	2.28533	3.30025	12.1492	3.25864	2.39281	41.6216	58.5051	37.2208	45.0223	53.9502	57.5526		36.0842	60.4689	46.994	61.3613	73.357	67.7858
MamGyp-int		4.04652	7.32154	6.92006	9.14627	11.5402	9.26994	8.14993	10.5584	7.6014	24.5008	13.1721	16.4782	10.9042	6.11557	5.98993	7.76155	12.1905	12.873		10.8836	6.09381	3.72452	7.29354	6.58433	5.93658
MamGypLTR1a		1.96564	2.00096	1.48692	2.70441	3.59959	2.09537	3.51022	3.62933	6.07114	21.698	5.10474	3.35874	5.59097	5.51844	5.4348	5.91968	13.4794	9.99237		7.45187	7.95651	5.5307	7.29103	5.91178	7.80632
MamGypLTR1b		3.24904	3.67295	3.83346	5.2886	6.09882	3.43608	3.9049	4.04555	7.05807	24.2382	5.57063	4.79877	42.6036	38.152	43.9405	57.7927	70.0057	55.1083		50.4817	20.9937	15.9808	16.7544	15.579	19.1442
MamGypLTR1c		1.44296	1.83249	1.19942	2.51967	3.68977	2.86647	3.15767	3.03319	4.73042	22.7287	4.47024	4.22905	7.15596	6.37366	4.89781	5.49118	11.5445	7.82285		6.45284	5.66365	4.12726	6.2635	5.34205	6.90858
MamGypLTR1d		2.05653	2.86139	2.4201	4.11857	4.49567	3.90578	5.52403	5.36487	5.40401	18.1386	6.73773	6.01966	7.2107	5.93629	5.96243	5.90203	9.67824	7.94499		6.87932	7.63621	7.31494	6.15334	6.35784	7.47308
MamGypLTR2b		2.04323	1.60896	1.56794	2.15339	3.3378	3.20173	5.42614	5.79734	5.02826	16.6968	4.71044	4.10386	3.59006	3.79479	4.20525	4.204	7.76237	6.22982		5.89621	7.21987	6.01441	6.18054	6.80208	7.18546
MamGypLTR2c		1.22953	2.60388	2.0397	2.50067	3.82669	2.46416	2.9573	2.8081	3.99397	19.976	3.86804	2.71264	3.92817	5.09356	4.10067	4.62076	8.95481	6.72234		7.10925	5.84898	5.04293	7.44221	4.91829	5.94597
MamGypLTR3		1.89905	1.92188	2.04283	3.06077	3.3859	4.07341	5.08002	4.3066	5.10726	22.8418	4.50593	4.01204	9.78002	9.66693	9.74848	11.1533	14.6529	13.0904		13.3268	10.988	10.4285	8.95522	8.98699	10.4137
MamGypLTR3a		2.83232	4.80164	3.75177	4.97003	6.81431	2.33006	5.18043	6.25276	6.16457	32.5531	7.46569	5.44963	8.77951	6.82761	7.16705	9.11215	17.5629	11.7544		10.0334	10.2088	7.89447	12.5371	8.57162	10.2551
MamGypLTR4		0.721364	1.55633	1.74213	1.67148	2.28128	1.19017	1.14943	1.51699	1.73732	14.0097	1.68876	1.92691	2.36908	3.52017	3.17654	4.1805	8.81851	5.66148		4.89469	4.02241	3.70871	6.14408	4.73454	4.55979
MamGypsy2-I		3.59079	4.85032	3.75723	5.412	6.54804	3.06763	5.0344	5.0916	12.4057	37.2691	9.01563	6.71223	13.7012	11.1143	11.0422	12.4122	26.4901	18.5833		8.48645	8.95762	7.23717	14.1918	11.9265	14.1951
MamGypsy2-LTR		0.598372	1.62917	0.86992	1.59985	1.96082	0.821387	1.18204	1.37994	3.34472	8.99359	1.89372	1.23747	14.1387	12.6093	10.8767	6.23446	8.56102	8.77026		6.83611	8.02284	6.33768	13.6021	9.00465	8.36482
MamRep1151		3.90579	4.30696	5.13144	4.96813	5.39509	2.66532	2.85074	2.36213	5.38016	11.2643	4.82604	3.37128	17.2371	38.841	29.906	24.6123	40.9117	41.1886		32.8088	31.7676	32.788	67.2132	42.2603	31.1055
MamRep137		13.3978	15.3522	11.7142	18.8351	19.8403	11.0126	13.5065	13.8241	22.1709	50.9288	22.327	18.9171	84.1835	71.9119	71.3683	72.9235	110.446	85.1043		55.4418	45.1325	36.894	49.407	49.0208	54.9522
MamRep1527		1.95541	2.7493	2.02318	3.20913	3.80027	2.96705	2.75121	3.28735	5.74052	26.3413	5.14403	5.01371	12.6587	13.4631	10.7693	15.2655	18.8204	14.4626		10.9175	10.8024	5.34175	11.5554	9.23536	9.86124
MamRep1879		3.03947	4.04923	3.82568	5.98074	6.32985	4.10693	6.41332	4.74363	10.0368	20.9246	7.0456	5.76099	13.0749	9.81175	9.4707	8.90129	21.0449	15.283		12.3528	9.89408	7.32836	13.0107	8.51326	9.92297
MamRep1894		1.59472	2.92891	1.82473	2.59853	2.73303	1.08959	1.2995	1.46394	1.79294	7.08149	1.98895	1.61002	10.1226	9.18479	7.44437	6.01807	9.45997	8.59899		6.62515	5.4257	3.30695	5.10943	4.20046	5.89556
MamRep38		7.42658	8.75487	6.76918	12.6767	13.3408	10.0682	11.4935	8.97887	20.1509	50.8457	15.7564	13.0893	32.5874	32.3658	29.3113	26.7597	48.4071	36.6046		32.9021	32.8067	23.969	38.5094	32.6079	36.7014
MamRep4096		1.64696	2.22468	1.76954	3.27283	3.59236	2.39711	2.14019	2.0811	5.45299	16.0578	3.83183	3.02459	9.71527	12.7025	10.5071	10.2908	18.4695	14.7111		13.5296	12.296	8.89091	14.1784	11.0058	12.0789
MamRep434		9.54895	27.8181	19.4162	11.8463	16.5109	10.8289	13.3996	14.9997	16.8038	37.3208	19.1758	16.0242	42.4595	43.1622	41.4782	31.7685	67.2574	46.4438		24.3265	29.3975	18.7928	22.1137	23.3377	27.2123
MamRep488		0.860303	2.46908	2.21138	3.20089	3.73655	2.1289	3.57767	2.27445	4.477	9.28835	2.92964	2.39537	5.66005	5.39068	4.99476	6.05282	10.1887	7.85759		6.13248	6.05133	4.48019	5.43605	5.30861	5.91174
MamRep605		39.125	36.4062	28.7088	24.6117	27.8222	14.8688	17.8489	14.5533	28.8298	71.1865	23.5681	21.3302	78.3749	73.3674	73.5518	61.3083	106.419	77.9268		50.8862	50.8343	36.9108	64.6093	53.324	54.3166
MamRep605b		8.78775	15.2975	12.0141	15.1318	20.2943	10.3092	14.5814	14.989	14.7267	48.5736	19.2505	15.4958	58.2348	51.243	45.7706	43.7963	70.0061	58.9225		38.6738	31.4891	23.8349	35.8181	32.8156	36.2736
MamRTE1		33.2368	43.2552	36.8282	47.4346	61.5058	33.3946	45.286	40.1408	66.2074	153.577	56.3182	49.0715	346.087	302.962	330.771	348.72	461.558	387.735		296.6	256.098	242.681	252.912	272.083	318.559
MamRTE2		0	0	0	0	0	0.419075	0.555625	1.14979	0.799606	1.51789	0.908043	0.66841	0.720638	0.411599	0.416362	0	1.01456	0.694548		0	0.895591	0.601883	1.05843	1.22385	1.43996
MamSINE1		21.7696	29.8421	24.0224	33.9994	38.8699	23.2335	31.8291	32.7385	43.623	101.6	40.8335	44.8583	152.343	135.534	148.069	167.548	256.132	197.709		135.223	152.564	133.288	232.311	186.713	194.578
MamTip1		1.1288	1.42237	1.27838	2.00163	2.81315	1.89422	2.1028	3.65856	5.47266	8.91865	4.21228	3.62981	11.5613	16.9398	15.2806	16.2007	23.0762	19.8834		21.9677	35.971	40.1025	55.0177	44.4365	38.62
MamTip1b		0.895991	0.982643	0.735047	1.13304	1.82921	1.02254	2.3742	1.36633	2.60732	5.01903	2.04565	1.90154	4.2897	4.52186	3.55648	3.66064	7.45412	5.00723		3.98906	3.11948	1.95833	4.71239	3.20794	3.52985
MamTip2		15.2845	19.9602	17.1547	20.6267	26.7876	14.2321	21.9716	21.3117	26.8803	70.7366	27.4471	23.824	58.5473	48.9	52.709	59.8994	96.5006	73.4395		58.5202	51.2925	45.979	41.0024	43.7194	55.815
MamTip2b		30.0291	49.0021	43.1121	36.6351	47.4231	32.5789	35.4488	34.4795	42.0172	118.676	42.0539	39.2079	101.277	105.066	111.833	129.358	181.303	162.325		142.313	149.354	106.687	141.484	139.085	158.764
MamTip3		2.16736	1.8428	1.2945	3.18106	3.63246	2.19595	2.87046	2.40177	6.8951	18.4488	4.42067	3.11011	5.94239	5.58668	5.20899	4.95835	12.3146	8.35694		5.96632	5.92437	4.18349	6.69107	5.25283	6.60955
MamTip3B		0.927359	0.979053	0.896661	1.87326	2.17301	1.29075	1.91455	1.98851	2.88578	11.7406	2.79737	2.2094	3.75832	4.35896	3.23627	3.10744	7.08101	4.86631		4.68346	6.0468	4.10394	5.09202	4.94983	4.52012
MARE10		0	0.667564	0.605755	0	0.510934	0	0.842735	0.498919	1.04504	1.25242	0.565974	0	23.4707	4.38935	5.61028	7.23758	6.03509	6.79894		2.04543	1.66093	0.741256	1.96942	1.36301	1.79975
MARE4		1.07241	1.46963	1.62382	0.801111	1.89687	0.620231	1.24597	0.960537	2.18005	2.9053	1.24703	0.899397	3.8769	4.81665	3.54047	2.98388	5.49335	4.4548		2.20086	2.84599	0.517762	3.57111	3.53089	2.67477
MARE6		0.508734	0.814312	0.53501	0.707084	1.00897	0.821387	1.01569	0.415825	1.34192	3.59521	0.980188	0.85472	1.69641	0.70177	1.18508	0.842588	2.60274	1.69702		1.11252	0.973302	0	0.562122	0.67274	0.890053
MARE8		0	0.602943	0	0.492815	0.739992	0	0.5039	0.455491	1.55793	2.32442	1.02404	0.986331	1.38533	1.11348	0.801674	1.14544	2.66022	1.76087		0.826644	0.942584	0.695312	2.10507	0.817763	1.26846
MARNA		20.9347	26.5988	23.3758	24.0921	30.8285	14.1537	23.0015	22.1692	28.2524	51.3852	28.7536	21.4248	158.037	131.371	130.457	119.281	164.199	145.541		91.3815	92.0742	64.4826	83.6186	77.5567	84.8546
MER101		3.59973	5.76275	4.52154	5.72545	6.55208	4.24104	2.67983	2.12188	2.35185	9.98745	3.14431	2.8823	3.98054	4.26799	4.2554	5.39254	10.7093	6.54275		4.89755	3.02079	2.86442	2.72774	2.12294	3.33403
MER101-int		17.0627	36.1735	27.8365	15.1981	30.1493	13.2123	28.3069	23.1777	20.0551	39.5745	23.3821	24.2389	47.8886	30.616	34.9463	36.6102	60.6806	45.6862		28.4002	21.2613	16.5261	21.6724	20.4932	28.895
MER101B		0.436268	0.414939	0	0.767641	0.805509	0.519653	0.62672	0	0.615349	4.59869	0.718762	0	3.19726	1.85717	2.47777	1.27718	1.83839	1.50302		1.11567	0.772045	0.497576	0.876915	0.535895	1.20028
MER102a		10.0368	11.5641	9.7629	19.2432	22.3576	14.4551	17.9056	14.8289	23.6213	56.6028	19.9292	17.5515	90.2596	94.54	86.6734	80.1624	130.676	110.004		81.9858	73.9861	74.6631	78.4476	69.8655	74.2054
MER102b		13.5309	14.8981	12.2655	23.4203	24.0325	16.9249	23.5066	17.6967	32.3831	66.776	30.9727	26.7377	83.8223	77.3365	75.5593	82.5168	126.875	101.065		79.8665	66.847	42.8354	48.3907	46.0605	68.601
MER102c		14.8693	13.5043	9.6395	18.2784	17.8743	14.795	17.5624	12.7249	26.3685	55.8609	19.1403	16.6634	69.24	48.7429	49.6145	50.9658	86.0171	63.8805		44.1209	42.7787	30.8762	39.9673	34.7911	40.909
MER103C		46.4989	45.9944	40.0833	48.3084	58.3605	37.4928	51.6747	44.5611	75.1262	148.286	62.0862	52.6017	242.887	192.707	182.211	192.648	293.642	239.114		169.084	209.24	151.63	208.44	191.537	209.454
MER104		10.3475	13.1718	10.0364	8.99909	12.6768	8.27522	10.679	9.92633	15.6081	31.4571	13.7482	11.3807	52.913	41.999	37.0071	33.964	61.3523	48.7077		31.0931	34.3364	24.5461	29.2975	27.9076	29.5094
MER105		4.25669	3.61326	2.52216	5.08566	5.05295	3.00058	3.67358	3.19886	6.29715	10.1907	5.55451	5.18504	25.1061	17.2328	15.3103	16.2349	25.404	20.3827		11.1486	9.67462	5.67457	8.84636	8.61858	10.198
MER106A		1.51985	2.45579	1.4005	3.4583	3.64238	1.89422	2.76357	1.7671	4.584	9.5415	3.17146	2.8334	12.5989	8.8743	8.24784	8.33478	20.4004	13.7777		8.90396	8.47281	6.32443	10.7667	7.79088	8.96826
MER106B		3.72736	5.40015	4.82028	5.49243	6.54749	4.6762	5.36491	4.57424	9.42636	11.0435	5.59057	5.19665	14.5475	11.7434	10.9361	11.0935	20.7158	15.6729		11.6114	11.8265	8.14631	10.8366	10.141	11.3926
MER107		1.63178	1.77128	1.20237	3.07516	3.21487	1.39133	1.62404	1.26688	2.47463	3.58318	2.07554	2.006	11.6833	9.73183	8.68257	8.23846	16.3329	12.2533		10.1596	7.82456	4.42578	8.66465	6.95839	7.5909
MER110		1.0623	1.65743	1.16765	1.94502	2.46917	1.71988	2.15824	2.05928	4.89822	15.4282	3.16966	2.53409	5.71131	6.97493	5.39139	5.60744	10.8505	7.85399		5.56687	5.12897	3.69248	6.86109	5.07938	7.6143
MER110-int		1.00613	1.65541	1.45663	1.83209	2.07022	1.49191	2.1706	2.09686	5.43474	9.32346	3.24652	2.63693	3.74551	3.47897	2.98202	3.29057	6.51315	4.42615		2.07864	2.36183	1.40737	4.18748	2.30272	2.94511
MER110A		0.974677	1.32875	1.11411	2.19341	2.99098	2.1289	2.79537	2.70352	5.07015	10.2176	4.10288	2.9724	4.17651	4.80223	3.64516	4.06046	10.8064	6.29515		4.79027	4.52598	5.60111	6.24569	4.96671	5.30795
MER112		20.6004	26.2603	21.8423	22.2439	30.8856	16.2769	27.0054	20.9018	39.5798	68.903	33.9106	26.541	105.79	103.595	83.6296	76.3798	132.469	104.703		70.051	97.4435	89.5665	107.614	109.998	116.031
MER113		9.84543	12.5753	8.4717	16.2806	19.785	14.6338	18.36	16.5264	34.9153	58.9951	27.2081	22.1167	86.5051	91.1843	75.1662	69.6484	119.017	92.7566		67.4365	86.4327	56.5643	68.0701	69.1048	76.5614
MER113A		4.8728	12.4155	7.65339	8.57327	11.5896	5.09595	8.28531	6.92584	13.9953	23.6222	11.6555	8.3637	37.2782	40.5061	33.8748	31.4188	54.6716	43.0034		27.7493	26.283	16.6019	30.8852	21.9192	23.6139
MER115		7.86681	11.5273	8.92099	14.5127	13.3787	10.3763	15.2643	15.1879	21.3722	75.3711	19.1353	14.8621	29.4014	27.1546	29.4849	28.281	57.3866	39.5698		28.0961	24.6614	21.2554	23.1036	20.4564	26.0861
MER117		12.2123	12.4013	9.40632	21.0852	23.3254	14.1869	16.4159	13.5312	25.5976	75.3192	21.3546	18.7015	188.06	247.247	188.052	187.716	219.223	210.649		171.177	140.964	157.125	166.967	159.371	167.189
MER119		5.54082	6.12118	4.43053	9.09278	8.44728	5.88381	7.01272	4.01997	10.2517	23.5001	7.78024	6.01112	32.6294	25.6567	22.5623	21.3072	41.3138	32.7174		17.0952	16.0487	12.2084	15.9944	14.1535	16.5108
MER11A		9.63112	19.6792	17.8892	26.2891	28.367	15.4977	22.3783	15.5793	31.1844	71.7109	23.908	21.3936	30.5454	36.5261	30.7441	34.27	62.5545	50.493		37.0966	37.0347	31.0491	57.3048	39.9732	45.1759
MER11B		9.16661	10.9718	9.14202	10.2342	14.6079	11.2892	12.4125	12.0279	26.2844	47.9687	19.0708	18.4292	22.8366	21.1273	18.1775	17.2648	30.9037	23.8269		17.8403	18.2546	20.2551	40.479	24.1553	25.33
MER11C		17.354	30.6625	25.3203	30.3017	40.0752	31.087	31.785	25.6297	46.9774	84.209	35.5376	36.2876	56.2237	70.789	59.6596	62.2763	92.0783	74.5964		62.1185	57.7541	48.9485	70.0576	60.4515	63.8162
MER11D		7.02975	10.3513	9.60956	8.68153	9.85041	5.07684	7.51488	8.24932	7.92922	22.9656	8.94652	10.6471	11.7308	10.4475	7.01806	10.0325	10.9963	10.6526		10.5321	12.0364	8.60164	7.6093	9.95815	14.4484
MER121		1.57195	3.52809	2.28766	2.35999	2.38269	1.02254	1.91868	1.84676	4.89218	11.882	2.99618	2.30318	6.31043	7.94372	6.6014	6.7693	12.9015	10.8815		4.90049	5.85449	3.20439	5.53169	4.90998	4.569
MER121B		0	0	0	0	0	0	0	0	0	0.963272	0	0	0	0	0	0	0	0		0	0	0	0	0	0
MER123		0	0	0	0	0	0	0	0	0	0	0	0	0.590112	0.67278	0	0	0	0		0	0	0	0	0	0
MER124		1.06668	1.4851	1.78892	2.07107	4.41612	0.921965	2.03457	2.08968	4.79205	8.49409	2.43319	2.47647	7.9009	7.21585	6.543	6.2892	13.0127	9.76129		6.69271	7.98065	5.80641	11.0326	7.67498	6.97378
MER125		0	0	0	0	0	0	0.502261	0	0.600315	1.292	0	0	0	0	0	0	0.787529	0		0	0.5837	0	0	0	0
MER126		0	0.446997	0	0.779709	0.602615	0.452601	0.719451	0.4955	1.58923	2.41625	0.914685	0.804998	4.87423	2.68802	2.49934	2.87467	4.73452	3.57986		1.61407	1.33952	1.16275	3.56673	2.0971	1.6607
MER127		0.61965	0	0	0.872374	0.541377	0.519653	0.413237	0.470875	2.10505	2.16587	0.899711	0	4.28477	6.07915	4.26061	3.38819	8.18309	8.27373		3.88475	13.7914	14.2726	23.6358	21.2465	16.8917
MER129		0	0.434958	0	0.447051	0.626444	0	0.762369	0	0.862146	2.7764	0.910423	0.457692	3.31179	1.95308	1.76663	2.57721	6.10831	3.98954		2.33632	1.26105	0.817252	1.25799	1.02832	1.15539
MER130		0	0	0	0	0	0	0	0	0.690172	2.70366	0.630958	0.773166	1.60226	1.20174	1.02055	0.942623	2.41785	1.70735		1.46917	1.06809	0.748705	0.769381	0.840297	1.29352
MER131		3.33254	10.5401	8.75148	8.31278	13.3399	11.3972	9.77884	11.3435	12.3998	16.0048	10.2266	8.69953	33.8955	63.1165	44.4546	45.3604	61.834	61.4686		42.4693	62.8249	56.2946	75.3789	72.4441	64.554
MER132		0	0	0	0	0	0	0	0	0	0	0	0	0	0	0	0	0	0		0	0	0	0	0	0
MER133A		0	0	0	0	0.656233	0	0	0.783686	0	0.673348	0.438817	0.515027	0.719745	0.805492	0.647325	0.622971	1.57747	1.26028		0.628996	0	0.610332	0.474594	0.415667	0.4713
MER133B		0	0	0	0	0	0	0	0	0	0.674669	0	0	0.657771	0.508352	0.412792	0.480517	0.60171	0.632013		0.644148	0	0	0	0	0
MER134		0.523987	0	0	0	0	0	0	0	0.438538	0.657412	0.402976	0	1.31624	1.7693	1.15226	0.965243	1.83821	2.00993		0.620436	1.41848	1.82993	2.19742	1.70728	1.57941
MER135		0.765342	1.12631	0.744315	1.66012	1.47958	0.989017	0.721981	1.77513	3.08952	6.99633	2.34553	1.59656	13.5562	17.5159	13.5646	19.2288	26.3614	22.5214		11.4326	18.0768	15.1332	12.7389	14.8812	15.7673
MER136		0	0	0	0	0	0	0	0	0	0	0	0	0	0.540627	0	0.503076	0.701103	0.806913		1.21564	0.762616	0.54987	1.3264	1.32175	0.983783
MER1A		29.699	30.9129	27.525	48.0086	49.3785	35.0035	47.4463	27.5661	61.7655	128.313	44.0081	40.4026	99.3637	78.884	74.2051	68.7241	125.896	97.6653		66.6811	57.683	50.8805	79.378	55.4456	64.8167
MER1B		37.1912	44.3502	35.9565	83.3101	74.583	59.9562	78.0971	44.657	68.9892	182.026	63.2873	54.3535	169.117	131.261	129.543	130.477	230	175.453		122.537	93.1823	72.1088	91.8141	79.5819	104.307
MER2		49.7124	68.0526	57.4253	64.5677	87.5121	36.8501	57.9381	46.1066	87.5894	134.955	66.8386	52.2678	265.964	264.234	259.605	230.785	394.863	315.334		223.092	210.453	169.868	187.238	189.882	210.597
MER20		85.8576	95.474	75.731	137.526	140.559	94.5111	115.141	103.563	144.522	379.564	132.364	116.489	447.547	380.44	377.733	361.621	589.041	460.807		376.69	314.735	264.41	329.907	294.268	332.897
MER20B		13.6043	16.4305	12.2818	22.1137	23.0968	12.5551	17.2109	15.8676	34.2991	79.9525	23.5033	19.1358	97.1974	67.7135	66.8551	60.1064	116.197	88.8829		59.956	59.4291	37.9128	57.8512	49.6083	55.7569
MER21-int		6.60352	5.50076	5.07928	7.92387	7.33551	5.78323	7.3533	5.75096	12.4912	42.6925	8.34106	8.33062	17.1675	11.7157	11.5491	11.8586	24.6303	17.4885		10.9155	10.8627	6.1226	10.9904	9.50862	9.47376
MER21A		14.054	15.6699	12.8596	26.87	27.0621	21.6075	22.7829	15.8432	35.729	76.1526	27.6013	27.7633	69.0311	65.2052	58.1813	49.9351	95.0452	68.8459		54.7759	48.4575	32.6368	53.5175	49.2766	54.1694
MER21B		27.5916	29.7834	24.3639	39.4261	41.7561	35.9901	39.607	26.4953	56.6504	122.493	45.9591	34.4011	100.498	93.5915	85.6732	81.5846	151.148	114.233		85.2992	74.2553	44.0729	63.7523	59.8716	72.2448
MER21C		92.6498	105.477	74.3042	99.5898	81.8306	125.158	179.58	143.274	670.204	486.464	422.32	237.702	160.249	110.116	114.266	110.867	236.39	160.784		104.022	94.6949	79.0584	198.722	89.9913	118.528
MER2B		6.96966	7.23826	5.54041	9.22887	11.1387	8.21387	10.7373	9.15826	13.2306	23.9619	10.0408	9.21151	43.2547	38.0286	29.4864	24.4564	41.1285	34.5056		24.6743	23.4063	15.5282	20.7761	18.9268	21.7853
MER3		33.5761	41.2465	32.1637	53.6238	54.7315	29.9206	47.4458	38.7514	67.6597	129.473	56.8488	47.8126	300.031	277.79	228.87	230.328	333.071	281.289		196.036	214.636	172.571	267.995	200.001	209.431
MER30		18.3307	18.2884	14.5389	23.8264	26.0715	15.2946	24.5121	15.188	37.44	54.6739	23.8728	17.9144	97.0411	73.7455	69.0287	60.8129	120.367	90.8269		68.915	57.3746	50.1035	68.6816	55.6416	61.1
MER30B		1.0537	1.27296	1.02366	1.20661	1.553	0	1.19867	0.817134	1.55992	2.15021	1.11836	0.942567	6.76979	4.31377	4.87775	4.19053	7.92913	5.69241		3.86012	2.69243	1.51186	2.15524	2.58679	2.81366
MER31-int		8.0112	15.2899	14.8519	15.1974	22.8907	13.8606	16.5206	18.6788	15.8343	39.4179	16.9802	18.0976	20.0538	22.6584	16.1773	15.7985	37.6438	28.8026		20.219	20.1574	15.649	22.2756	19.0034	21.3614
MER31A		9.29833	7.96786	8.47135	13.8843	17.9606	10.8795	17.3739	13.3249	25.1764	41.6331	15.3195	12.4893	30.2116	32.0034	26.2822	22.9762	44.6091	32.4361		28.3715	30.3097	24.2243	27.2995	24.5018	27.8297
MER31B		5.74392	5.41127	5.43433	9.18843	10.6333	6.31965	11.216	7.57328	25.279	42.5958	15.2198	12.6304	26.2209	19.3847	20.2916	16.6144	36.6155	26.1081		19.3611	18.9145	12.2281	24.198	18.718	20.8329
MER33		30.4193	33.7909	26.1138	45.3699	49.8896	32.6272	49.7202	38.8449	73.0096	120.923	56.6484	43.2098	213.671	215.919	182.699	170.54	274.854	237.715		169.192	161.795	137.956	158.672	141.733	152.94
MER34		8.33785	6.95687	7.48663	10.2864	10.9431	7.82798	9.59073	5.68711	13.3518	28.8629	8.46875	7.51115	18.6319	22.4205	17.3964	14.5966	26.8804	21.4275		17.8842	16.4958	11.7693	19.7966	15.6864	15.4777
MER34-int		2.2535	5.08604	4.32907	6.5594	8.20839	4.76907	8.73758	17.103	8.02555	24.1477	11.8375	12.8222	8.12018	8.67203	7.75651	8.62187	12.9711	12.7347		12.0069	16.3973	11.4962	12.994	17.194	18.4789
MER34A		5.05244	4.98919	4.21201	6.30714	6.47442	3.00058	8.56302	4.43267	15.4576	26.5267	8.5864	5.87739	18.4691	18.5509	14.8317	14.7316	26.2644	21.399		15.855	15.6017	9.15855	23.2254	16.1516	16.5983
MER34A1		3.42708	2.92164	1.90311	4.56878	4.30589	3.83839	6.44796	4.66211	8.43184	18.6544	7.0708	6.41317	15.3126	11.3309	9.93324	10.5756	16.2537	14.2572		11.8892	11.6571	9.39073	17.9832	10.4554	11.3573
MER34B		3.1642	4.63911	4.05111	5.14592	5.43949	3.16787	3.94003	3.18184	7.80015	13.4694	4.27581	4.13604	10.7676	11.3983	10.2032	10.7987	17.986	14.3275		10.9762	8.42323	6.30336	8.67974	7.46863	7.87773
MER34B-int		19.237	32.5354	32.9884	17.0477	31.929	25.3949	24.0837	36.8738	26.9189	43.9526	36.6301	25.3764	30.922	35.9746	31.0992	28.6259	50.7161	39.7084		28.1503	30.6133	33.364	25.7368	33.5046	26.9332
MER34C		0.420956	0.437425	0.427863	0.836667	1.03073	0.687283	0.810388	0.444382	1.54096	1.45215	0.966158	0.606148	1.91826	1.25303	1.08448	1.1239	2.1656	1.54799		1.35161	0.926305	0.441263	0.65603	0.760375	0.948396
MER34C_		5.93909	10.8333	11.5585	9.08416	12.7492	4.54244	9.87806	6.51368	8.80593	16.4371	13.167	9.40944	8.92927	15.3963	12.7341	13.8525	23.7792	16.1747		12.4947	16.0139	11.537	15.0238	15.0347	13.8601
MER34C2		3.08181	3.4204	2.27822	3.65409	7.6436	8.49884	7.07759	7.04258	9.77592	18.5992	7.24418	6.38565	10.0739	8.06418	8.19087	9.88267	14.9807	11.7405		12.7012	12.5639	12.3075	9.70614	10.2794	10.462
MER34D		0.908423	1.08926	1.24424	1.20764	1.66635	0.821387	1.06367	1.00004	2.64603	5.28473	1.78504	1.24791	2.13789	2.44824	2.06095	2.35482	5.35259	3.39316		3.13736	2.64382	2.19236	3.23067	2.76821	2.99466
MER39		9.90851	12.9588	11.1464	19.9786	20.4947	12.6889	20.6691	18.6367	32.8572	75.3832	21.2113	20.9523	38.8799	40.3576	33.7367	34.9963	64.7501	46.2027		39.5388	38.1173	31.8994	47.5412	37.0509	39.1646
MER39B		8.37542	10.6672	10.9748	14.8726	14.9554	11.8514	19.032	9.71346	33.5102	44.2009	16.2217	13.9689	17.6921	29.3934	19.9047	21.2175	33.2862	29.6399		26.0101	23.5757	22.4095	35.4567	24.7366	24.1201
MER4-int		14.103	14.4655	12.2751	20.0054	23.5672	13.4433	19.2784	14.0987	30.0976	82.2828	22.4526	19.9914	59.1771	68.8624	56.0215	54.6216	85.3288	71.9331		45.9936	43.453	27.2649	43.5621	42.6083	45.3944
MER41-int		21.385	39.9793	29.504	29.9587	38.3324	23.5621	31.5493	32.3474	29.616	91.1056	34.4854	33.1807	60.817	51.2415	49.7915	56.5225	104.308	70.9849		45.3444	42.1278	31.4034	47.0893	37.4816	46.1334
MER41A		13.2409	16.4798	17.4501	24.3816	29.9458	27.8712	33.0415	18.0739	41.2119	83.7993	29.3657	25.4015	31.2878	40.7765	34.7412	35.8772	66.3468	47.9666		41.588	40.4271	32.0426	44.6403	41.922	42.2279
MER41B		11.5051	14.7651	11.9167	19.993	25.7682	17.7349	28.7343	18.7006	30.1355	78.2075	27.5849	22.2998	42.0763	49.7106	44.7701	42.3886	76.1039	58.8551		50.37	51.5171	38.6618	55.8295	44.7161	46.0537
MER41C		1.9895	2.8823	2.64123	5.16683	5.13398	3.83873	5.37361	5.12088	9.45698	17.1448	5.98212	5.4252	6.87882	8.99468	7.96571	7.25747	15.6751	11.362		8.65766	10.6937	10.7565	14.3447	10.6524	10.9027
MER41D		1.75021	1.93652	1.63133	3.42293	3.07635	2.33006	3.78638	2.75438	5.79812	12.368	4.68468	3.66525	11.0781	10.2263	8.48912	7.57787	11.9009	12.1226		8.18669	7.06737	6.84043	8.12576	7.42259	7.36129
MER41E		4.68599	7.20517	7.54996	9.82977	9.24994	5.8419	4.63845	2.96333	6.75932	18.898	4.27656	4.93819	8.6127	11.8126	9.91664	9.91025	17.7096	14.434		11.8995	7.53719	5.94188	10.6159	7.75499	9.00715
MER41G		4.91497	3.89623	4.66945	5.20905	5.42833	4.17399	3.43725	2.99217	3.60546	4.97181	3.21736	2.09441	6.01743	8.98619	8.01462	6.81403	11.2884	7.64082		7.62576	6.53808	7.23306	5.14047	5.8009	6.1156
MER44A		13.5613	17.932	16.7691	15.9402	20.5039	16.8468	26.0891	22.9215	43.0224	53.3559	29.4324	23.6765	88.2367	92.9213	83.0118	82.0312	114.337	95.9716		86.0971	108.383	125.307	140.132	128.89	114.877
MER44B		8.15016	10.9529	7.95443	14.2895	15.7505	9.01313	12.3164	11.1222	16.599	45.4002	16.001	13.4425	48.1025	33.0446	29.8202	26.1891	55.0878	42.7942		28.9311	25.8951	15.1093	24.7442	22.0708	25.7244
MER44C		7.64721	10.1349	7.9224	20.2562	20.8361	8.48241	14.6215	11.5434	18.2487	36.679	16.7038	13.1581	44.6849	35.4812	31.5241	40.9935	87.2646	62.4774		33.383	30.0681	18.0366	27.6618	25.1093	34.4655
MER44D		2.40262	2.78696	2.31162	4.61019	5.5118	3.92254	5.70194	4.33718	13.5462	17.4293	6.57638	5.70652	12.8375	9.84917	8.40234	8.13579	17.8995	12.8276		8.42968	10.4332	10.2397	14.0816	11.4824	12.3572
MER45A		9.5812	10.4955	10.1454	12.8859	14.3068	9.4037	12.3168	11.8539	19.3633	50.572	15.1565	13.0117	28.0423	28.5152	27.1409	28.4904	51.2145	38.6432		32.7826	28.2272	28.1283	39.5447	30.9224	32.1833
MER45B		2.13233	2.70695	2.40921	4.68914	6.66379	3.10115	6.12554	6.03235	8.25261	29.313	6.53874	7.1668	12.5068	14.212	13.4422	13.348	26.3834	20.7948		17.4986	19.3243	18.2835	14.9718	17.4939	17.0581
MER45C		1.07766	1.28772	1.10228	2.2093	2.94676	2.56474	2.02786	3.00667	5.54914	30.9152	4.20752	3.07394	5.57331	3.844	4.26258	4.28928	10.0854	7.56689		5.45229	3.87719	3.72349	7.37282	4.08463	5.47076
MER45R		1.21392	1.58452	1.21778	1.6499	3.46249	2.56474	2.98068	2.34375	3.98997	11.0227	3.08531	2.38634	3.63552	2.80663	2.98126	2.84377	6.70685	5.09106		3.30642	3.58068	3.02891	3.3787	2.82382	3.18962
MER46C		15.3948	17.6119	13.9332	20.0018	22.2004	14.0306	15.3103	14.04	25.2662	47.0469	20.5537	16.9525	82.3252	76.4659	67.6934	65.0376	112.425	91.7085		63.6053	63.5637	47.7561	59.0787	54.7862	62.9168
MER47A		11.9907	20.128	16.143	21.7162	26.7716	16.076	18.7703	17.9855	29.4581	54.5564	24.0054	20.6443	108.299	108.093	90.9061	96.3816	151.23	129.502		75.9448	83.0842	58.3513	106.336	92.0025	89.5596
MER47B		3.76039	8.13555	6.69701	6.38311	7.30019	4.14046	6.28469	5.73805	7.39458	19.9324	8.8564	6.37262	13.8674	9.84617	10.1246	10.1687	19.6423	15.3696		9.55447	9.01115	5.91394	8.78632	8.72474	9.89998
MER47C		2.035	2.7526	2.11407	2.83721	2.96648	1.24046	2.11007	3.01851	2.2456	8.44701	2.93192	2.76437	9.75372	9.29537	8.20869	8.12903	13.7886	9.62357		6.00958	5.9272	3.25381	5.8258	5.32192	6.88872
MER48		0	0.626732	0	0.439964	0	0.519653	0.837462	0.806544	1.8691	3.83629	0.672226	0.638113	0.796949	0.876104	0.827133	0	0.977927	0.781877		1.15953	1.0369	0.587401	1.24722	0.874285	0.909072
MER49		13.5818	25.1434	22.8662	26.7206	32.2366	22.5586	22.2039	20.1004	21.7328	50.3697	24.6621	25.9167	38.5942	53.3133	43.0283	51.3179	69.9175	59.5468		49.8213	44.5023	32.254	42.9929	44.0893	48.6594
MER4A		5.57587	7.40843	6.76282	11.1871	14.5313	11.0468	13.8612	8.7507	19.9723	35.8994	14.2274	14.5166	29.8087	38.6558	31.3485	29.6349	46.3187	40.4486		29.0357	30.1262	30.8328	35.7157	36.22	38.668
MER4A1		12.6953	20.7749	18.7597	24.5636	31.2497	21.7409	23.3768	16.2744	26.9666	57.797	24.9398	20.4952	37.0919	44.0979	37.2069	39.6911	60.3123	47.1374		40.0226	37.0824	28.8366	35.4218	30.7659	35.0918
MER4A1_		2.43734	3.29646	2.46352	4.24331	4.53937	2.06151	3.17422	3.82659	5.23359	13.4053	4.42335	4.11923	8.94657	10.0158	8.6755	8.17487	13.268	11.802		7.46425	8.61448	7.81423	7.97289	7.04684	8.16907
MER4B		8.20192	11.0485	9.88785	12.7928	15.6596	11.7173	16.0481	15.3286	26.3952	53.1229	20.8413	16.3925	24.1581	25.9538	21.4108	21.2	40.6258	31.7291		25.2739	27.2957	25.4672	33.5764	31.5273	31.6389
MER4B-int		6.15091	5.852	4.85248	6.12757	8.14926	5.88381	6.99196	8.77792	15.7187	46.5696	11.5012	9.71863	17.9396	13.9416	12.5767	12.4197	22.0491	18.3243		12.3488	15.197	12.0653	17.2758	16.5064	19.2959
MER4C		2.05197	3.51065	3.13135	6.60988	8.08942	4.91156	5.60043	4.94437	8.00237	17.2344	6.22469	5.37828	12.6384	14.129	13.1727	14.2378	34.0777	23.9746		14.5741	13.7583	9.67514	15.8811	11.9606	14.0595
MER4CL34		4.76315	6.61143	5.48479	8.80437	11.4699	9.13583	10.5567	9.88379	16.9441	35.2315	14.0039	15.6649	12.9193	14.9677	12.4155	14.4166	24.8829	19.6708		18.0488	19.209	19.1641	19.6495	19.5757	26.0342
MER4D		6.33215	8.68122	7.03675	10.8543	15.4345	9.09359	12.4797	8.75436	16.876	38.5258	13.5243	10.8766	21.8948	30.9268	24.2188	19.1064	43.2166	32.17		20.1558	20.9683	18.9674	27.707	21.1866	21.5067
MER4D0		1.481	3.95943	3.49731	5.89857	6.38483	4.97861	4.72037	3.88787	5.53636	14.0226	5.00005	5.56715	18.5837	22.3807	18.9141	23.807	38.373	31.2625		27.5047	23.3411	20.3675	19.5945	18.7295	25.0376
MER4D1		10.1799	12.2269	10.7491	14.5915	17.9675	12.5199	15.6683	12.5619	25.6892	55.7541	19.5338	16.6331	30.4504	31.5416	26.5367	25.8258	50.0975	40.1583		29.9	28.5703	21.0411	36.2942	27.5054	29.8172
MER4E		2.98687	5.14723	3.18077	5.7081	6.46801	4.91156	5.59856	4.91898	8.71351	18.8497	7.75796	5.47353	12.772	13.8874	13.2522	11.9527	23.6178	19.3578		16.0872	13.239	11.6232	15.2042	11.691	15.6849
MER4E1		4.09031	6.77696	4.70837	8.22217	9.49527	6.05144	9.13898	5.39922	12.4954	27.0671	8.40962	7.55503	18.8054	23.8256	18.1179	16.9835	31.3292	22.9643		15.247	17.4232	10.546	20.4241	14.9341	15.4054
MER50		14.5592	17.46	16.4487	26.2635	33.909	29.117	31.8903	20.9189	34.242	93.8929	31.8169	26.4007	29.074	33.3806	30.1085	29.4644	61.4334	45.6276		40.9761	37.0234	31.2184	41.4335	33.4792	39.1814
MER50-int		3.41241	6.15519	4.5892	9.63103	11.3039	5.6156	6.44481	6.02719	9.07832	42.3956	7.86842	6.44866	24.9133	21.8333	23.6279	22.171	42.3647	27.2391		24.0145	16.8811	11.2121	13.9237	14.4001	17.208
MER50B		1.73605	2.22579	2.01969	5.08837	5.02357	4.34162	5.68233	4.45811	7.67619	27.3712	5.81758	4.74555	7.88843	7.61909	5.31231	6.62355	10.6264	9.45525		8.84315	10.2122	6.71946	11.2382	10.6732	11.8344
MER50C		1.18925	3.00757	2.64064	2.69847	4.4335	2.49769	2.35965	1.20257	2.35866	4.11851	1.09303	1.02346	2.52517	4.17863	3.35873	3.33886	4.70793	4.8219		5.37599	3.28341	2.55658	2.00926	2.36159	2.55496
MER51-int		4.69741	6.61744	4.87862	6.06445	7.1238	3.6711	6.29103	4.83137	7.7941	21.1661	6.20473	7.18684	19.9137	15.6563	14.5208	15.5616	19.3907	19.1966		11.9171	12.5473	12.3914	20.2281	14.5442	12.6183
MER51A		14.2466	15.4249	18.3285	21.2455	25.584	31.8329	30.0497	20.877	51.7311	39.7092	29.0258	24.8416	27.5292	39.3939	35.2272	32.2484	50.6647	41.105		42.5854	39.4652	47.7036	52.4027	45.2094	46.0568
MER51B		2.35984	2.12414	2.07557	2.5694	3.26545	2.22948	3.80319	2.50683	5.71	12.2789	3.81815	3.03444	5.95523	6.52307	5.50229	4.41747	8.0062	5.88024		6.67577	6.19337	5.5331	7.66952	7.07649	7.20985
MER51C		3.77023	5.7518	5.66935	8.06917	8.79366	8.88439	4.33414	2.87995	7.16465	8.03652	4.32243	4.64761	6.21527	7.59677	6.80914	8.01859	12.2747	10.047		8.93082	6.786	6.18705	5.8587	5.74129	6.34113
MER51D		2.51977	1.66006	1.72442	2.1477	1.7246	1.15598	1.79207	0.741027	1.53402	2.89091	1.01254	1.33195	2.92518	4.34495	2.66903	3.13638	4.35022	3.11959		3.58792	4.21295	1.95793	2.69087	2.07768	2.23744
MER51E		1.80475	3.00697	2.66038	4.82261	3.89919	3.43641	3.21031	1.96136	4.40532	6.25222	2.88279	2.90938	4.93927	8.82344	6.9357	7.29728	9.64861	8.49773		6.90657	8.22215	7.18713	7.57772	6.02766	6.11931
MER52-int		2.60341	1.55	1.17708	2.63032	2.46551	2.06151	2.0503	2.54687	4.08826	43.8183	3.14683	2.73094	3.94919	3.53006	2.87445	2.97072	6.29469	4.82464		3.72871	2.85751	1.82464	2.6729	2.6627	3.14319
MER52A		19.7285	14.7744	11.3502	30.2872	22.4958	19.5735	24.6159	18.552	33.3171	172.337	26.0686	24.6171	38.7421	27.5997	34.1747	35.094	69.1919	53.37		33.4641	32.2202	24.742	44.0078	29.8926	32.9998
MER52C		4.40241	7.87809	5.6297	8.75074	9.0465	9.43757	8.38698	8.02122	7.76495	29.3886	8.22788	6.4205	9.62816	13.9974	11.0904	10.1721	16.4405	14.426		14.1862	13.9127	8.42595	12.3655	11.9664	10.0317
MER52D		13.4917	6.86057	5.3438	7.95311	6.80203	5.77183	6.17103	5.25905	8.09922	50.449	6.71949	6.21087	12.2217	8.08499	6.83043	5.89162	13.8408	8.78854		7.38102	6.59076	4.70559	5.11023	4.63889	6.44276
MER53		6.87438	10.8548	9.27256	11.4746	16.7167	9.81943	11.6386	9.58351	18.0975	39.1499	16.3036	12.2561	64.6064	82.6123	62.0025	61.4027	93.9961	82.9873		73.0314	69.8526	43.469	63.8515	52.1833	57.789
MER54A		3.91841	4.43924	3.54839	6.6049	8.55552	6.11816	10.4686	9.84009	12.8809	33.1729	12.2962	11.2068	20.7112	18.6348	15.8287	12.3039	20.2835	17.9308		14.9042	16.4112	18.1327	20.9457	19.356	19.6951
MER54B		0.870379	1.49379	1.09425	2.03408	2.1041	1.92774	2.55515	2.04248	3.55146	13.3129	3.30489	2.42668	7.85043	7.21672	6.55066	6.01931	12.1806	8.91602		6.77351	5.54773	3.81576	4.93051	4.61587	5.79165
MER57-int		10.3041	8.44626	7.74077	8.15785	10.6238	9.85094	13.5049	12.4745	17.8213	59.7388	12.3712	12.3826	26.5258	22.0217	16.1477	18.7731	25.2317	19.8423		15.8166	18.2128	15.0838	38.5911	22.6562	21.9001
MER57A-int		16.0224	15.5945	12.4467	14.9577	18.0543	9.06543	18.2398	10.6053	17.9776	60.5118	20.1241	13.6342	71.4164	77.9038	59.2901	69.6779	107.305	85.795		50.4701	32.0382	18.2179	22.006	25.5013	31.3138
MER57A1		3.42036	3.56569	3.43281	4.98381	5.54711	3.66271	5.25198	3.83309	7.38311	21.3431	5.72837	3.74571	8.24383	10.4429	8.42088	8.6931	20.1614	11.774		7.96786	10.9748	7.28165	9.87474	7.36804	8.0338
MER57B1		2.67216	3.89404	3.17585	4.12874	5.81822	4.91156	6.2192	4.74696	9.05343	18.8929	6.10561	5.98421	9.92903	11.7194	9.01205	10.0703	16.8207	12.5792		13.5972	14.7429	9.5093	19.7559	14.2252	12.3622
MER57B2		3.27041	4.08256	3.98683	5.41691	5.8518	4.92497	5.27149	3.14826	7.30928	20.0472	4.37782	3.86934	28.8924	26.0032	23.1245	22.026	27.9527	23.4191		19.9461	19.7268	18.7657	24.7722	21.255	21.5409
MER57C1		3.58939	5.62842	5.67284	4.8546	5.10792	2.53121	3.5956	4.40433	2.60876	7.50963	4.46144	5.55929	8.29222	10.1201	9.92357	15.0447	20.5877	18.8666		11.5858	8.8629	9.00633	6.74665	7.29242	8.7536
MER57C2		0.841484	0.755787	0.599499	0.997059	1.45171	0.854913	1.83562	1.59641	2.60875	8.43038	2.26689	1.76844	3.74067	4.01828	3.98346	5.025	8.95363	5.59188		5.18673	4.05229	3.99083	3.65668	4.36626	5.55914
MER57D		2.53952	2.98905	1.89361	2.8478	2.84657	2.09537	2.68808	2.44203	4.91429	10.2599	3.51056	2.72333	7.67154	6.90689	5.87498	5.2529	8.95165	7.70035		5.04782	5.70781	4.2333	4.88265	5.15283	4.95874
MER57E1		4.88661	11.1892	9.02608	17.6329	12.9363	18.9589	9.43604	5.69129	21.4504	17.0899	7.66662	8.95885	4.58531	3.65416	2.84842	3.15089	6.66929	5.02134		3.10784	2.56435	2.28959	4.62092	3.87537	4.3955
MER57E2		0	0	0	0.413816	0	0.452601	0	0	0.49498	1.06199	0	0	1.21012	1.98404	1.2872	0.820028	1.4817	0.969939		0.546801	0.821391	0	0.866683	0.697612	0.575428
MER57E3		1.89885	1.72327	1.25476	2.35373	2.16371	1.89422	1.64823	0.816132	2.13264	4.81676	1.87614	1.43234	9.3742	6.42788	5.73703	5.08853	7.86409	7.42132		3.94012	3.62152	2.12819	3.60528	3.39007	3.36696
MER57F		1.08519	0.795065	0.702164	1.36258	1.77291	1.37457	1.1721	1.38374	3.98046	7.19341	2.32963	1.906	4.76105	6.63105	4.15546	3.39032	6.41085	4.88638		4.59555	4.83108	6.70044	8.76032	7.16409	5.01224
MER58A		63.8007	72.6243	54.445	85.6266	93.9471	58.9192	81.9207	66.1207	128.315	226.734	97.6105	81.1269	382.631	330.85	289.421	294.874	467.843	374.547		256.189	259.148	179.502	274.303	247.878	273.081
MER58B		31.6274	37.5909	30.0982	43.7517	48.7984	32.017	42.3555	33.2316	72.1309	109.588	49.8557	42.7976	228.018	226.527	211.658	203.927	313.415	251.266		166.24	147.763	150.186	211.543	163.614	169.922
MER58C		10.0683	12.0001	9.49287	15.3936	16.47	10.7283	13.978	9.78097	18.8807	27.3086	15.6452	13.1801	79.3064	73.3618	68.1697	66.4867	98.3456	85.1282		55.1015	51.7985	36.4654	47.9085	50.1964	49.8226
MER58D		3.65575	3.69511	2.72868	3.02437	4.25642	2.81048	5.90049	6.71388	6.90179	13.4516	9.55644	6.37707	16.3659	11.06	10.443	9.92045	17.4797	13.5465		9.48008	11.4164	9.00134	10.0703	9.91973	11.9394
MER5A		132.258	188.942	145.882	207.004	234.1	145.741	181.432	157.931	220.029	544.021	214.35	189.601	611.961	530.572	529.683	549.595	916.474	691.693		526.88	443.321	388.701	423.498	399.175	493.899
MER5A1		48.6634	68.1853	55.4925	80.0503	93.7185	58.4358	82.0519	66.7046	114.847	258.496	91.629	81.3815	230.37	196.349	198.863	198.417	324.609	257.168		212.088	209.392	147.669	196.813	167.215	215.306
MER5B		82.6698	116.77	91.6851	124.063	148.806	94.1497	117.183	104.093	154.981	348.691	145.681	128.94	472.794	436.515	413.174	433.91	654.39	528.812		409.593	344.716	300.231	367.406	334.617	376.821
MER5C		2.61171	2.2998	1.84298	3.71068	3.39722	3.20173	3.05169	2.36496	6.79993	10.3697	3.78971	3.1871	23.6495	25.0083	18.3458	15.9672	30.8671	24.9659		13.6763	12.503	8.20748	13.1203	11.6493	13.5689
MER5C1		2.04003	3.35239	2.70284	3.77335	4.52232	3.10115	3.45431	2.92479	6.69642	10.2938	4.20665	4.03001	11.817	9.98431	9.27097	8.59944	17.9699	12.4878		8.55445	9.75272	6.75503	12.081	9.61274	8.67693
MER6		7.29289	4.0397	5.01085	11.6286	12.1983	5.21329	8.12493	6.3737	11.31	23.9137	9.16992	6.04005	22.0654	15.4996	13.2075	11.4106	24.2702	19.0185		11.8613	12.2764	11.9947	15.3304	11.6861	12.599
MER61-int		11.495	19.9743	17.2747	21.9693	37.2222	21.8479	28.163	23.3174	34.5983	88.5855	36.0695	29.2879	26.417	39.5908	28.0564	29.8096	76.2261	51.6793		45.6032	50.531	42.0213	54.0616	52.9392	51.6659
MER61A		0.678364	0.927518	0.662835	1.93623	1.47187	1.59248	2.02758	2.23873	3.48008	15.0531	2.62658	2.796	4.36357	3.41444	2.49361	3.26102	5.54406	4.55546		3.72743	3.07545	1.92355	3.47725	3.35906	4.13552
MER61B		0.871062	0.841965	0.64097	2.07117	1.83707	2.79942	3.2039	1.01629	5.77658	9.92317	2.41316	2.21416	2.87142	2.57886	2.73423	2.28187	5.45483	4.21943		3.74413	3.4412	3.60696	3.63109	3.33322	2.87295
MER61C		0	0.59966	0.443208	0.716579	1.01326	0.754335	1.21359	1.19876	1.91466	7.67777	1.08696	1.00305	1.45489	1.18999	1.29699	1.2047	2.11166	1.82217		1.51211	2.02578	1.05872	3.18335	1.5388	1.57139
MER61D		0.777389	0.67808	0.668218	1.67999	1.41037	1.05607	0.737695	1.17894	1.36181	6.79146	2.05148	1.39052	3.26221	2.86468	2.41863	2.45438	5.12935	3.35964		2.1847	1.88422	0.754678	2.9285	1.5228	2.40402
MER61E		2.10369	1.75013	2.15645	3.94166	8.68228	3.46994	5.85691	4.44974	4.08504	11.4013	4.26846	5.39481	4.67997	4.85262	3.77619	5.4505	10.5271	9.17866		8.79286	7.90657	5.9584	7.13884	6.49831	8.42761
MER61F		0.446745	0	0	0.421241	0.42018	0	0.413029	0	3.38309	3.58614	0.974644	1.36411	2.28721	2.80965	1.61891	3.27546	3.95003	2.99589		2.40192	1.6936	0.745753	10.1903	2.18582	2.68914
MER63A		8.12961	8.88962	6.81746	12.56	15.2065	10.6948	14.9126	12.1055	23.2308	60.7916	17.5913	15.7218	39.1656	31.1303	31.1251	33.275	60.8436	46.4898		36.5944	38.2908	30.7806	52.5651	44.9854	43.5459
MER63B		5.58169	12.3366	9.55725	12.436	12.7598	9.58273	15.8819	7.89967	22.1849	36.338	13.7715	10.9337	33.3379	32.6816	27.7163	30.6319	48.1108	41.9315		22.376	23.7581	14.5116	21.9824	19.8364	23.2665
MER63C		3.57624	9.20137	8.10839	9.47767	10.0617	5.48452	9.99346	8.03776	13.1725	21.8529	9.98537	9.0798	15.1002	21.2266	17.3421	16.5096	33.7733	24.1889		16.7683	19.4872	16.3246	18.2275	17.528	17.1821
MER63D		2.7367	3.55413	2.81178	4.86334	5.78341	2.93352	2.95103	3.64731	8.04188	17.0906	5.06463	4.33612	23.1695	26.3733	23.237	22.6302	35.8202	30.8685		22.604	27.6008	19.964	29.6544	28.3431	27.2401
MER65-int		16.9648	29.1006	28.6833	13.6122	18.5386	13.9113	13.8952	9.20991	13.9097	41.2784	11.272	7.93717	21.8221	17.303	18.6407	24.1008	40.9458	31.4338		15.0094	12.5941	7.8304	15.8395	10.7005	10.3249
MER65A		7.74198	7.21553	5.62073	8.65804	11.414	8.86762	11.742	9.29135	15.9249	33.4921	13.7246	11.4358	22.2924	24.4412	16.9585	17.5124	24.2422	21.5396		16.0887	22.837	18.6672	26.0477	23.1587	23.4614
MER65B		1.43845	2.38816	2.28453	3.23146	2.78947	0.754335	1.4496	1.05172	1.66725	4.17717	1.09158	1.27301	3.30315	3.77782	3.9905	3.45833	5.31184	4.4002		2.73761	2.28307	1.36747	2.80294	2.0882	1.93247
MER65C		2.22047	2.8206	2.09988	3.63272	3.47994	2.36358	3.04795	2.5658	7.69232	13.1114	4.1139	2.98713	8.25428	7.02844	5.65234	5.44321	12.6527	8.96311		6.82558	6.76945	4.6913	8.42765	5.40393	5.91399
MER65D		2.15255	2.3764	2.32852	4.18653	4.24703	4.44856	4.44094	2.40548	6.79565	10.3097	4.62278	3.86773	16.5801	19.6956	17.8517	17.8393	18.6551	18.0672		16.7497	20.4488	18.5191	20.4739	19.3157	20.7418
MER66-int		3.74394	5.38643	4.93243	10.4144	13.6786	17.4835	13.3899	8.36536	14.7936	46.0106	11.1038	10.9013	18.336	21.8358	15.5569	16.9337	26.9136	26.1718		29.008	22.2611	17.3597	24.3356	18.7829	19.4717
MER66A		1.11259	1.42636	0.753889	1.98388	1.89477	1.52543	2.72672	1.82859	2.25084	11.133	2.14064	2.08426	3.36558	2.6519	2.74166	1.89737	4.60023	3.81047		3.0102	2.42407	2.40106	3.79776	2.67746	3.40959
MER66B		3.85255	5.20448	4.89863	8.20998	12.635	9.73963	10.0865	11.7136	15.4833	45.1778	16.1314	14.0254	21.3287	18.8916	16.2842	18.1082	27.2431	23.2634		18.3021	18.1104	17.9992	16.291	16.8994	22.1747
MER66C		3.11607	6.17913	4.52273	4.48797	5.62979	2.63179	4.52938	3.27986	3.65361	15.7117	4.05901	3.6054	6.83502	5.8042	7.28994	8.83853	11.8551	10.7699		7.77416	4.65128	3.51508	4.39826	4.61456	4.99235
MER66D		0.805235	0.583956	0.435509	1.19178	1.27329	0.687283	1.13869	0.97829	2.08712	6.37564	1.32929	1.29001	1.63716	2.42139	1.9057	1.92688	3.31039	2.99783		2.21223	2.83001	2.89901	2.82222	2.53651	2.24771
MER67A		6.48084	5.12477	4.9013	7.74738	7.85018	8.98496	6.9219	5.60822	8.34906	13.3033	5.27597	5.65742	14.9881	11.4258	10.6112	10.5372	14.7893	12.2225		10.1895	10.6828	9.27951	10.41	9.83343	11.0147
MER67B		10.2216	12.6054	14.2398	11.4393	16.0223	8.63294	10.9615	7.54115	14.0657	19.7501	10.7026	12.2236	15.9028	14.91	20.3429	21.7667	30.1666	24.4097		17.5087	16.8121	10.1831	9.74836	11.4347	16.7885
MER67C		7.90244	14.174	11.4196	13.7564	15.8977	9.42047	12.8145	12.1301	18.6828	38.8881	15.1365	13.1315	23.9179	27.2024	21.9658	22.6866	39.5884	30.2166		20.887	26.0336	45.6477	35.1707	42.607	52.9333
MER67D		2.21946	2.69999	1.61144	2.76766	4.80516	2.26569	2.71885	2.98712	7.04864	16.5158	4.01619	3.33757	7.33473	8.03898	6.49946	6.02139	13.4837	9.31871		8.31448	8.37546	6.56107	14.9432	8.82437	7.87601
MER68		19.2093	27.6054	21.3427	37.3401	40.5887	24.2561	30.8263	23.8372	33.6149	64.5651	33.8603	28.8545	87.2151	73.1166	74.0636	69.7498	125.191	93.6751		65.6509	47.5255	36.153	46.1615	42.5119	52.1638
MER68-int		44.981	86.4483	75.1506	65.7861	78.9966	44.0364	62.1126	54.0689	35.3158	67.8906	78.2225	74.2711	47.2829	64.5692	66.9577	87.2268	96.1017	80.1897		61.9008	74.0137	73.1325	54.8399	65.702	89.4472
MER68B		3.07269	3.21113	2.39063	7.85755	6.24833	4.77745	5.1503	4.0453	9.28513	15.1317	7.087	6.75219	21.3529	14.9871	14.0121	13.5822	28.2738	21.449		14.7709	12.2842	6.24575	21.5501	13.7679	13.5228
MER68C		0	0.479779	0.471736	1.0504	1.16521	0.754335	1.11234	0	1.10011	4.00261	0.806215	1.04301	2.32372	3.57071	2.30969	1.79056	3.15439	2.63265		2.11042	1.96506	1.27392	2.50445	2.50764	2.14405
MER6A		7.40878	6.96986	7.72155	14.6245	18.0038	9.8734	10.8135	8.49807	15.1206	33.0672	12.2555	9.87699	26.9821	24.6662	19.0026	24.2491	48.5078	33.6935		25.0537	19.9381	14.9393	18.791	17.7405	20.5427
MER6B		1.60471	2.17119	1.56824	3.67156	3.27542	1.59215	1.9331	1.77084	3.49078	8.91752	3.30721	2.93545	21.2474	17.3114	15.4493	14.6481	27.4582	22.5446		11.7781	9.30607	6.87918	10.3215	8.32702	9.2849
MER6C		0.55532	0.597675	0.561406	0.667791	0.686955	0	0.800209	0	0.912099	1.33024	0.462674	0.559536	4.2321	3.51595	2.61625	2.29024	3.72264	3.33996		1.60619	1.50904	1.17314	1.27509	1.32605	1.45698
MER70-int		7.86226	6.68395	5.17438	9.78924	8.0903	4.44219	4.72216	3.15544	3.916	19.4346	4.26906	4.14407	13.8827	15.0832	12.7948	11.8662	17.4379	14.8241		9.23625	8.51777	6.23828	5.76388	5.98434	7.74385
MER70A		6.15893	6.24878	7.03423	6.1523	7.22511	3.9393	3.22249	2.21703	5.38404	15.9923	3.58108	3.07506	9.60239	12.3258	10.3388	8.55756	14.4376	12.4279		9.123	5.53183	5.2995	6.07219	4.97426	6.09779
MER70B		0.620383	0.776632	0.614034	1.07955	1.17441	1.69306	2.00359	1.41206	2.34273	10.58	1.28488	1.30853	3.0916	4.72657	3.98535	4.29821	5.15948	3.79584		5.73654	4.59191	5.46647	5.86232	6.51723	5.98489
MER70C		1.18695	1.98649	1.31156	3.03409	3.25804	1.69306	1.83941	1.25065	2.57597	11.6473	2.98948	2.42315	3.47748	4.42809	4.7191	4.80916	7.9954	5.99329		3.69073	2.77254	2.89389	3.61937	2.7049	3.80935
MER72		10.3584	19.2326	17.7708	17.8691	23.0717	9.16969	16.477	13.4384	11.4116	35.5165	17.4744	16.6253	9.11154	8.88716	8.66804	9.31902	19.3149	12.7177		11.7418	10.81	7.91078	9.56191	8.3852	11.7647
MER72B		0	0.426309	0	0.793175	0.605809	0.452601	0.728947	0.575456	1.67405	4.39413	0.812342	0.784063	0.698764	0.680696	0.782035	0.759715	1.76262	1.39046		0.923923	1.30581	0.681611	1.20011	0.665016	0.989219
MER73		1.12106	1.12166	0.875536	1.93969	1.8168	0.955491	1.36726	1.29416	3.35401	9.44036	1.60268	1.07115	4.5757	3.29628	2.73229	2.7725	5.11647	4.43168		2.60263	2.04807	1.88929	3.32364	2.0572	2.51791
MER74A		7.93919	14.0894	11.9486	17.6175	22.6429	16.3774	21.347	14.3784	28.1438	56.322	18.8582	15.0216	34.6281	33.1993	35.4506	32.1007	68.7917	46.5921		37.0877	28.9027	22.9905	32.0589	25.0686	31.6613
MER74B		11.4977	11.6854	11.1658	14.0671	17.1657	10.4102	10.3499	7.59066	15.3512	33.1987	10.2591	9.41019	26.9164	36.0367	39.391	41.8152	61.4492	49.1111		46.5597	49.9949	39.6289	28.8601	43.9149	59.4781
MER74C		1.72602	2.58681	1.78331	3.16132	3.11185	1.32428	1.20468	1.11685	1.40111	6.47095	1.98254	1.4106	2.9694	4.12427	4.57988	4.18658	7.87124	5.7805		4.44678	2.48346	2.04945	2.12956	2.1845	2.45339
MER75		1.76107	2.72324	2.06412	2.92133	4.16829	1.89422	3.01976	1.92852	4.0653	8.10134	2.9516	2.95803	16.5957	15.4373	9.99428	7.696	13.2382	11.8021		5.5716	6.10271	4.2314	7.51331	6.26069	6.41486
MER75A		0	0	0	0	0	0	0	0	0	0	0	0	0	0	0	0	0.604061	0		0	0	0	0	0	0
MER75B		0	0	0	0	0.411021	0	0.478385	0.621033	0.740775	1.46288	0.750153	0	0.827378	0.661982	0.524163	0.430051	1.20449	0.8118		0.738282	0.844042	0.546516	1.01044	0.81332	1.15108
MER76		2.42169	2.93529	2.43481	3.23491	3.2127	2.1289	2.26501	2.5606	4.11781	21.4674	3.63431	3.35883	9.15256	5.44698	5.94524	6.66019	10.6152	8.64677		5.7879	4.40865	2.68717	4.5493	4.32318	5.22213
MER76-int		1.51745	2.06003	1.39248	1.93179	1.3834	0.921965	1.47176	0.900795	1.72542	7.31237	1.96857	1.55795	3.2476	3.19576	3.19401	2.74127	4.53048	3.22944		2.56503	1.52464	2.01094	2.55702	2.40708	3.59627
MER77		15.6331	23.2304	19.5489	27.1333	33.6196	25.9883	28.3816	25.6284	35.2379	58.5924	30.5254	24.885	43.4002	48.2563	46.2361	46.7312	82.0339	64.4608		54.3844	58.0757	46.4968	52.9306	47.7701	49.704
MER77B		5.8045	7.82345	6.31637	11.2911	11.8439	6.72196	9.22174	7.66191	17.9947	47.1164	11.4425	9.25174	29.7016	23.2428	22.2691	22.1359	41.2254	32.7536		22.8068	20.1023	16.6994	30.2272	19.1646	20.9966
MER8		9.31877	12.7191	8.18616	14.2701	14.7618	8.45995	12.7563	12.9913	17.7391	37.835	17.7873	14.2765	66.1824	52.9287	53.1517	48.2857	81.0646	65.4823		45.2016	43.5585	45.6293	47.3531	48.6016	47.191
MER81		6.06632	7.34241	6.34508	10.758	12.0215	9.50462	11.6931	8.89855	12.9749	44.0457	13.3995	11.5804	36.3296	32.7656	32.5508	30.3879	54.5905	41.1363		35.2558	26.9062	20.6441	25.2601	24.449	31.9681
MER83		3.55294	4.24695	3.9055	8.09614	9.90392	5.74971	7.45166	5.83477	8.5741	15.7005	7.73876	6.8231	10.463	14.705	10.9745	11.972	17.8773	15.1485		16.6478	15.2113	11.4267	10.6598	11.8741	13.2211
MER83A-int		0	0	0	0	0.603112	0	0.684329	0.472098	0.458987	4.07093	0.888186	0.773142	4.46801	1.52155	1.4484	2.31431	1.70941	2.61547		1.86789	3.05868	0.916893	1.33279	1.67703	2.18654
MER83B		1.21296	0.625196	0.454507	2.6038	2.88332	2.24054	6.14814	1.70927	5.5515	5.25697	3.2024	2.42562	4.36697	5.07316	4.38822	5.00902	6.21073	6.20081		5.79527	7.73599	9.09309	8.79471	7.25828	8.45612
MER83B-int		0.490703	0.95231	0.627479	0.923834	1.31203	1.37457	1.99721	0.980367	2.08568	10.5441	1.97819	1.44068	2.64038	3.34793	2.09965	1.66573	3.38362	2.8195		2.5978	2.67164	1.9029	4.08558	2.37209	2.86691
MER83C		0	0.820544	0.674374	0.869408	0.868918	0.515294	1.39935	0.794961	2.47198	3.19388	0.940631	1.12357	1.04408	1.5071	1.2568	1.1436	2.12914	1.69217		1.96967	1.63535	1.11417	2.47254	1.43108	1.56606
MER84		0	0	0	1.22182	0.850305	0.720809	1.07278	0.604712	3.12431	6.261	1.24871	0.873048	2.79908	2.50408	2.0056	2.39169	4.72303	5.11043		2.87952	2.7052	1.52358	3.30912	2.44197	2.31067
MER84-int		0	0	0	0.711409	0.947743	0.667167	0.466836	0.753176	1.09884	7.08518	1.29023	0.743027	0.660276	1.05159	0.641782	0.983322	1.6522	1.15012		1.21721	0.952211	0	0.89794	0.807567	0.741828
MER85		1.62494	2.30732	1.49652	3.14465	3.02781	1.89422	2.87865	2.41673	3.8715	10.1105	2.55848	2.23918	17.8674	16.705	13.1417	10.5399	21.9175	16.7398		8.6344	7.76141	4.63396	8.25633	5.97969	7.21232
MER87		0.578569	0.485912	0.574614	1.15798	1.27825	1.2237	1.98211	1.71141	2.39916	5.52427	1.54037	1.16255	3.07902	2.97772	2.24819	1.64325	2.86884	2.46614		2.41387	3.26564	4.142	2.62343	2.2284	2.01539
MER87B		2.01964	1.52097	1.70189	1.72021	2.64955	1.49191	1.89841	1.39928	2.87845	4.87654	1.89172	1.76429	5.37622	3.42711	3.53113	3.54041	4.71019	4.75742		3.75819	4.6658	2.04674	4.77851	4.87269	3.86701
MER88		0.723714	1.02302	0.824103	1.51738	1.72197	0.754335	0.469799	0.645316	1.11281	3.63363	1.10287	1.18573	1.88052	2.52218	1.82439	1.98281	3.71766	3.2078		2.3188	1.56589	1.18476	1.08837	1.12844	1.56868
MER89		8.11807	9.34761	7.74884	13.9975	16.7592	11.0971	14.2398	9.48913	22.2595	41.9091	13.1842	12.8204	18.7853	20.1492	19.2225	16.29	31.0054	25.3383		17.5313	20.4099	14.9709	27.1046	17.7847	19.5492
MER89-int		1.97666	3.78424	3.02198	3.86169	5.29587	2.46416	3.65506	2.85496	6.44278	18.5687	3.87003	3.95996	6.40241	9.55794	7.25217	7.66911	13.7982	11.7282		7.73131	7.5735	5.43372	11.7717	7.26191	7.4434
MER90		3.51143	4.61213	3.95816	6.46399	5.17429	3.66674	5.27536	4.70101	8.85844	19.055	5.5517	5.02726	14.663	13.3484	11.2667	12.7467	18.6961	16.0452		11.44	11.6287	7.80374	13.4206	13.4707	13.5862
MER90a		11.6091	16.9254	14.6348	19.5283	21.3865	12.9943	17.4231	12.9601	22.115	47.0382	18.3679	17.8965	37.6799	46.5579	39.4567	38.3853	60.7027	55.3785		35.9457	40.1277	30.6623	31.7125	29.0434	34.5292
MER91A		14.7102	25.726	19.2354	29.5067	32.4014	22.1104	27.5827	31.5497	25.6277	87.5421	33.1922	32.9584	47.5774	42.697	47.5009	49.2597	87.6542	61.8224		54.6886	53.2494	50.3292	46.45	52.3905	71.1595
MER91B		6.16207	6.19079	4.82506	6.37373	7.6774	5.58174	6.72784	5.95546	7.79847	24.5176	7.82681	6.62085	31.5782	27.6395	26.5001	27.8802	40.9968	32.1817		22.0221	17.9607	8.22304	14.7807	11.8395	16.393
MER91C		2.22812	3.09546	2.40364	6.00042	5.52604	3.40289	5.57547	6.64129	7.98509	28.8469	8.16419	8.38377	43.8386	46.5895	47.1107	38.2942	49.8894	47.4471		20.6248	13.2079	8.83125	13.028	11.1259	12.2594
MER92-int		3.37229	6.08884	5.21689	4.6758	7.30338	3.05623	4.78137	4.68134	6.11429	19.6269	5.65173	5.06159	9.21654	9.55719	7.92687	9.19362	20.4725	13.7974		7.10232	9.9134	4.61263	7.81216	6.70375	8.72004
MER92A		0	0	0	0	0	0.787861	0	0	0.862067	2.78501	0.698921	0.603204	0.660919	0	0	0	0.616361	0		0.564322	1.29652	0.998236	0.737314	1.03115	1.41774
MER92B		5.99564	7.02817	5.32277	9.66476	9.85399	6.99017	10.499	6.62483	15.9129	25.3072	9.1707	8.65764	25.8918	30.2114	24.8943	20.7356	31.0113	28.1477		26.1889	24.6626	18.72	18.6763	20.6683	21.7548
MER92C		0	0.499012	0.435008	0.63406	0.568243	0.653757	0.504731	0	1.05855	2.47251	0.468192	0	0.973757	1.39209	1.04363	0.9709	2.11731	1.52065		1.13865	1.14313	1.31186	1.17373	0.818724	1.0746
MER92D		0.801359	0.795344	0.80031	0	0.66197	0	0.627942	0.611343	0.778173	2.50604	0.569644	0.54996	1.54444	0.853087	0.93535	0.987494	1.88119	1.25517		0.876895	0.928346	0.741865	1.00704	1.07409	1.07407
MER94		9.51679	14.3034	10.1534	14.5939	17.6399	9.47109	13.1652	12.1509	26.1026	50.0566	16.6446	15.5023	54.0384	41.4992	40.7684	44.4266	76.8968	58.2427		41.4202	43.2834	26.1803	41.665	35.3271	41.7158
MER94B		1.33711	2.94317	1.69893	2.41317	4.23145	2.67839	2.38498	3.86577	4.28289	10.0729	3.54013	3.71087	8.65115	7.32211	7.48092	9.77303	12.9852	11.9509		9.55821	7.36923	2.7786	6.9466	5.29472	7.27457
MER95		1.43841	2.26319	1.99878	4.13902	3.01273	1.65954	0.638937	0.970865	3.38389	2.46544	1.47503	1.3523	5.05126	9.76271	6.1643	5.52473	7.30848	7.24074		2.85602	4.51046	2.21036	3.50061	3.75908	2.96526
MER96		2.02388	3.72196	3.46015	6.11144	6.52128	4.10693	3.8809	2.95058	6.45301	18.2425	3.89976	4.20277	12.337	11.4426	11.0935	12.1443	18.9649	15.4595		9.91039	8.5743	5.78387	9.12119	7.65759	9.3891
MER96B		4.18696	4.92677	4.84555	6.04291	6.89281	3.8052	4.91114	3.9864	9.14252	17.2141	5.93696	5.25008	18.7568	18.0517	15.3902	14.3702	23.2953	19.9286		16.0791	18.0662	15.7556	28.2504	18.5509	19.7009
MER97a		0.795572	1.11627	0.99373	1.68019	1.41441	0.486127	1.18495	1.01759	3.73004	5.31159	1.1217	0.946147	1.70546	2.3433	1.80305	1.82642	4.59066	2.9847		1.79725	2.04842	1.11838	2.91165	1.7801	1.61808
MER97b		0	0	0	0	0	0	0.559201	0	0.641165	2.39988	0.936049	0.5083	0.65622	0.995877	0.864379	0.715807	1.55591	1.24212		0.865436	1.22131	1.37561	1.60122	1.40342	1.10297
MER97c		1.09112	1.55776	1.30813	1.20248	1.4473	0.553179	1.62018	1.36076	1.56778	4.23818	1.06883	0.809088	2.64051	3.29765	2.67143	2.82638	4.71168	4.04229		2.12539	3.272	0.615888	2.84147	2.05174	2.02163
MER97d		1.06851	0.570444	0.509965	0.796444	0.77799	0.419075	0.972722	0.482246	1.28377	3.25291	1.30322	0.958469	3.18323	2.90948	2.23175	2.34324	2.17858	3.1062		1.63011	1.75631	1.23234	1.71833	1.97328	2.23107
MER99		1.50765	2.25922	1.78426	2.46406	3.74205	1.06713	1.92003	1.5045	1.95728	5.03001	1.65549	0.91611	5.97195	6.47977	4.64405	4.94434	8.17564	6.75061		3.91857	3.5881	1.26989	2.43647	2.24636	2.78083
MER9a1		1.05928	1.33353	0.96339	2.16976	1.92747	1.91534	2.67799	1.37164	3.15335	10.1331	2.03055	1.69441	4.64607	6.0478	4.18653	3.82808	6.50415	5.25074		5.20867	4.80968	4.83729	7.05405	5.69798	6.19522
MER9a2		2.42164	3.07129	2.76267	4.25843	4.87872	2.41421	4.02059	1.79352	3.68191	8.46446	3.25571	3.18858	7.04819	8.50927	6.63208	7.27867	10.3506	10.2919		6.48767	3.85025	3.50313	5.27552	3.91828	3.94353
MER9a3		2.83952	2.56838	2.37979	7.41631	5.92565	8.53471	7.13043	2.68569	7.83398	15.7251	5.27502	4.66062	18.6719	16.2537	16.9369	16.1256	25.2384	20.7372		19.7978	13.8289	9.85867	11.1108	10.9454	13.6249
MER9B		0	0	0	0	0.472987	0	0	0.442782	0	0.911657	0.476994	0.474421	0	0	0	0.492132	0.540516	0.624285		0.673728	0.683435	0.415787	0.437116	0.79937	1.08008
Merlin1_HS		0.626798	0	0	0.897972	0.558183	0	0	0	0	0.650924	0.50522	0	8.92173	6.31354	8.3082	8.781	12.4067	9.38297		4.28434	2.83978	1.53179	3.47606	3.13833	4.52154
MERX		1.11216	1.56282	1.13186	1.6986	2.3591	0.486127	2.37409	1.10862	2.90184	6.79412	2.61582	1.82767	9.26752	7.83802	5.58184	4.66081	9.22752	8.10084		2.9814	4.72369	1.8955	4.74233	3.36194	3.75936
MIR		559.857	786.174	615.816	984.976	1111.36	679.924	881.143	755.009	1337.07	2900.3	1100.47	972.49	3149.95	2827.17	2556.47	2468.42	4407.88	3487.57		2330.83	2317.85	1693.01	2352	2021.53	2378.01
MIR1_Amn		46.9931	69.019	57.0518	87.5448	90.903	62.3577	71.017	62.1574	84.3504	197.377	78.6822	77.4759	287.757	285.967	266.57	264.256	391.156	349.916		422.957	451.148	394.409	484.073	317.949	339.534
MIR3		481.965	535.283	420.858	582.559	597.477	400.035	492.365	415.549	647.766	1386.26	551.072	518.45	2252.84	2282.37	2328.97	2379.57	3351.5	2758.36		2222.58	2060.26	1891.52	1874.84	1839.87	2173.05
MIRb		762.659	972.935	772.923	1296.52	1448.64	949.011	1216.03	1055.64	1772.22	3884.68	1506.67	1369.51	4469.8	4095.16	3840.17	3857.52	6612.91	5287.29		3874.3	3699.52	2839.98	3514.21	3231.91	3835.78
MIRc		471.358	572.777	460.286	650.201	693.477	436.788	562.196	511.205	753.23	1684.2	690.388	633.009	2260.78	2269.19	2230.98	2331.76	3434.35	2768.74		2244.75	2040.23	1838.01	2407.46	2170.61	2368.58
MLT-int		2.26521	2.94969	2.51004	3.58034	3.07782	1.82717	1.7697	1.32991	2.69667	8.53542	1.94784	1.59354	10.9309	8.76162	8.91478	9.69645	13.8566	10.2309		6.10763	5.49964	3.26796	5.34293	4.14187	4.69644
MLT1-int		0.912984	1.21551	0.734049	1.21188	1.57393	0.653757	1.58433	1.35266	2.83938	6.54352	2.29152	1.28704	2.65999	3.22408	3.62307	2.60785	6.18989	5.61989		2.44853	2.72381	0.422218	1.9879	1.6911	2.75709
MLT1A		41.5221	58.2492	49.4322	67.5718	82.2478	56.7531	67.2205	51.2341	100.496	211.021	63.6736	58.33	130.273	131.217	118.938	121.926	229.086	165.847		128.738	116.698	82.7001	127.234	94.4481	108.506
MLT1A-int		5.94172	10.9767	7.73845	8.55008	9.52653	4.07341	5.52964	4.46595	7.97779	19.7132	7.25814	4.74833	12.2149	7.84487	10.4404	10.8553	21.0704	15.8685		9.66214	7.71421	4.95992	7.45313	6.2046	8.60796
MLT1A0		81.9701	101.381	85.7247	137.356	154.149	102.545	148.189	111.662	212.668	474.768	154.536	139.206	300.964	310.15	284.592	301.042	518.353	396.815		326.045	292.303	253.203	317.71	272.458	314.379
MLT1A0-int		3.44575	4.56331	4.50852	6.30369	7.57558	3.77838	5.32735	5.7642	11.3024	48.1242	7.89687	6.25688	15.8863	10.5174	9.49306	11.9181	25.6711	15.5733		12.6093	10.3423	6.42694	12.3822	8.13798	8.55814
MLT1A1		31.8228	42.863	41.2152	46.6593	54.2077	33.0342	45.3883	37.3759	57.5036	150.838	47.8588	38.6302	93.6639	100.714	91.7247	93.3564	154.949	119.394		92.4841	86.1768	68.7442	95.6538	77.9925	85.8954
MLT1A1-int		4.18611	5.73773	4.89203	5.58315	7.4918	3.77167	7.40256	7.03215	9.85691	38.0907	10.2443	10.2798	13.3669	18.1788	16.0452	18.2924	26.7147	22.1909		18.9845	26.8309	26.1462	34.519	32.9448	35.6565
MLT1B		73.175	92.0564	73.3449	114.519	135.161	83.4968	128.28	102.635	198.445	420.942	144.753	127.654	275.934	261.042	235.388	239.966	442.117	331.329		257.167	240.113	198.998	300.495	228.797	263.355
MLT1B-int		8.97169	18.0799	13.6009	15.0207	16.1865	8.43179	9.38503	9.93074	13.2252	39.7531	13.316	12.5153	47.3271	36.0027	35.0838	39.6911	55.5855	52.3692		33.6923	30.2082	25.753	46.4062	37.8191	35.6842
MLT1C		40.3109	33.517	32.7808	52.7571	58.7709	37.2373	53.0226	42.2704	92.0042	195.099	66.4436	57.6029	148.525	143.23	124.413	117.874	188.02	148.66		117.541	103.927	82.9139	123.349	99.8592	119.632
MLT1C-int		0	0.758258	0	0.714913	1.08333	0	0.435345	0	1.32763	7.08856	0.900596	0.858246	1.98554	2.13641	1.84024	1.81329	3.06288	2.25251		2.45838	2.75657	0.976818	2.40669	2.00396	2.08012
MLT1C2		68.8257	84.098	67.1481	124.797	139.702	95.4361	124.056	95.8746	177.038	456.644	148.793	130.898	297.184	267.19	240.497	230.377	451.769	326.198		257.271	234.369	167.009	255.159	210.519	245.298
MLT1C2-int		2.39548	2.33445	1.66141	4.91647	5.00255	5.04566	4.63239	3.78585	7.10344	20.4284	4.93848	6.15184	28.6047	26.6424	24.2702	24.2861	37.5944	33.206		29.5533	23.2906	11.6416	20.6882	19.8565	21.4625
MLT1D		80.1458	91.4683	79.7712	126.231	150.362	107.332	151.007	126.31	218.856	529.107	172.202	156.754	335.114	267.962	252.708	267.962	489.338	353.455		300.441	278.505	237.927	292.11	248.084	284.807
MLT1D-int		2.92119	3.18346	2.56813	4.87629	5.89972	3.26878	7.59149	6.97892	14.4608	32.6948	15.0076	13.0038	58.4739	50.0171	60.5289	89.3458	104.82	83.4893		65.1312	49.033	32.5982	42.6523	47.3119	51.8038
MLT1E		2.81977	2.53154	1.92744	3.52912	4.93252	5.5519	7.68905	4.33528	9.81724	23.2128	7.60466	5.71658	8.75611	7.68427	7.4669	8.24188	19.2566	13.0375		12.2839	11.3788	12.0734	12.3152	10.3087	10.6484
MLT1E-int		0	0	0	0	0	0	0.580113	1.24071	0.714929	1.41593	0	0	0	0	0	0	0	0		0	0	0	0	0	0
MLT1E1		8.11923	9.45997	7.22499	8.52839	10.0395	7.19099	8.41393	8.2457	8.7893	32.9235	9.3867	8.76871	19.7975	20.3555	17.163	17.2742	31.7217	22.64		17.4807	19.2366	10.4135	18.4124	14.8205	15.5277
MLT1E1-int		0	0	0	0	0	0	0	0	0.463999	0.976713	0	0	0	0	0	0	0.55205	0		0	0.589934	0	0	0	0
MLT1E1A		9.69732	12.2962	9.45152	17.2054	17.53	10.8198	16.3026	14.4891	28.026	83.8072	21.6539	19.0344	54.9068	65.1727	76.3078	69.4046	106.954	78.6648		57.0412	70.2259	90.5735	82.0222	88.8951	112.777
MLT1E1A-int		4.41942	3.30067	3.29328	2.49838	3.41781	1.9948	3.11904	2.82273	1.6656	6.86661	3.18207	2.47571	6.73757	3.53645	3.00069	4.32905	3.14206	3.43939		2.99539	2.83473	2.51335	1.41286	2.61036	2.80367
MLT1E2		24.5436	32.471	25.1066	36.8048	41.2109	27.7639	34.3795	27.4357	46.1951	130.074	37.6062	34.4504	89.3347	111.554	103.984	100.04	166.437	140.715		113.084	94.8055	76.9873	157.158	112.45	109.611
MLT1E2-int		5.08654	7.37888	6.55067	4.6402	6.73109	2.88994	5.32314	3.54804	4.54622	10.5949	4.26569	3.6808	10.4135	8.57412	10.1881	12.0456	17.279	14.4739		8.16078	5.72088	3.10434	12.2619	7.86569	6.75578
MLT1E3		6.29868	7.32661	6.17785	12.3697	12.5665	7.71634	10.0593	8.6161	19.1827	48.8079	12.5138	10.13	63.2777	89.7795	67.4559	55.9302	87.3037	74.1767		53.4223	45.5511	29.4468	54.4521	46.6512	44.0249
MLT1E3-int		4.83765	2.72647	2.35425	2.37159	2.55578	2.4132	1.73178	1.67277	3.1156	3.96067	1.53985	1.60678	4.18031	3.59423	3.36865	2.24174	4.89326	3.69231		2.69397	1.2521	1.19964	1.5038	1.18768	1.30975
MLT1F		36.2417	49.477	42.3963	69.7749	72.6722	64.7994	72.4513	46.3302	68.7339	170.989	69.7627	63.0538	99.6228	99.6632	94.4416	93.5158	148.871	118.32		88.0828	86.7403	69.3505	104.14	84.4634	87.2134
MLT1F-int		10.7715	11.4369	10.3519	12.3836	13.3473	7.12427	8.71916	6.62833	8.43547	27.7625	10.0503	8.67335	17.6164	20.2975	20.2395	17.3324	31	24.0529		15.1182	14.2959	10.4551	17.3262	15.2819	16.8327
MLT1F1		15.4181	19.0293	15.9129	24.5591	27.521	19.0813	24.8168	19.5999	32.8986	92.2178	28.0822	25.7014	89.3974	70.5506	69.2227	72.9564	108.335	84.685		62.7305	51.1795	39.5571	57.8501	44.7815	55.2378
MLT1F1-int		5.0661	2.52826	2.03486	4.09795	3.9051	1.82717	4.97259	5.15207	6.46038	13.5707	5.99656	4.59332	11.3694	13.641	11.434	12.0178	15.4181	15.3858		7.0862	7.40776	2.85267	5.76381	6.2903	6.46296
MLT1F2		35.6373	54.7885	46.833	65.317	74.0991	43.7306	55.2412	47.4342	76.5904	209.283	62.8649	57.8772	120.802	119.472	112.059	122.731	192.965	161.269		110.152	104.459	79.3876	103.354	92.9125	110.608
MLT1F2-int		15.9907	19.6455	16.0725	14.8613	16.2952	6.21907	6.45167	4.91441	7.09781	17.2569	7.06214	6.34814	27.6806	18.6306	22.1088	23.532	30.8554	27.3306		15.6259	9.7963	7.4909	10.7625	8.531	8.30285
MLT1G		10.643	15.9998	15.0491	24.0406	27.7561	16.88	24.5162	26.3867	30.6615	90.0639	27.921	33.2174	40.2499	34.5444	29.8161	34.311	61.19	47.6193		33.6813	36.5003	27.6987	40.3831	33.846	37.863
MLT1G-int		3.04455	3.70794	2.50466	5.23124	4.87895	1.92774	2.39032	2.28637	3.55162	9.04322	2.51424	2.98679	20.0952	11.3064	11.648	14.6237	21.705	19.76		9.477	7.28859	3.36324	7.21031	5.17933	6.13812
MLT1G1		14.3302	20.3922	17.432	29.4543	31.3242	20.9464	33.5289	28.6039	37.9364	128.808	40.5931	32.0993	42.7283	45.4226	43.398	46.2005	82.5119	59.8679		46.4872	58.4816	35.7298	49.8175	40.3558	50.9517
MLT1G1-int		5.0277	12.8589	10.9265	7.37544	9.53817	13.4607	9.1322	6.40909	8.5132	18.0895	6.0119	4.32303	5.94708	9.34805	12.3236	11.5075	16.399	11.3892		13.1481	8.66415	8.7479	9.05619	6.60445	7.39815
MLT1G3		11.1282	13.5116	10.6528	20.6072	20.7664	16.0254	23.9391	18.0239	31.0613	83.6534	24.0745	23.1885	47.5069	37.292	34.1531	35.9569	69.5922	53.9468		36.0424	33.3582	22.2003	35.4037	28.9436	37.1912
MLT1G3-int		3.36283	1.21594	0.94758	2.13617	1.76098	1.42485	2.46698	2.42096	4.32557	11.554	2.93454	2.3453	8.10065	6.01537	3.6279	2.96197	5.80837	4.47925		2.81748	2.93689	1.94245	3.63492	3.12035	3.71621
MLT1H		35.1506	52.3179	45.0604	70.5956	75.6629	46.0044	59.5193	47.1345	82.8128	282.124	73.725	68.1204	171.09	139.721	140.062	152.751	245.677	197.517		153.426	139.813	108.476	175.888	136.193	158.486
MLT1H-int		2.72733	6.18283	5.53497	6.45401	6.81628	4.84451	4.73432	4.78477	5.44341	26.2653	6.24039	5.28615	17.3189	15.4914	12.4688	15.7552	22.4295	20.8025		16.4016	19.3592	14.2393	15.1783	15.675	17.9949
MLT1H1		11.8458	16.0746	14.2601	23.5327	26.468	21.2763	26.9773	20.5077	37.9451	118.477	30.4597	27.5454	47.0589	49.2559	47.9746	46.158	86.6517	65.0326		53.0101	47.3815	36.3208	45.2777	41.3424	45.7979
MLT1H1-int		1.81713	3.16079	2.2254	1.9875	3.06654	2.15337	1.39722	1.82584	3.70649	16.9747	3.35648	2.50839	5.06139	5.27516	4.43501	4.48382	7.72693	7.41111		7.20499	3.84562	2.3167	5.95766	3.10387	3.98418
MLT1H2		11.5541	16.1675	12.3731	22.558	25.3154	15.9463	21.1292	19.2596	32.0925	107.458	27.3103	24.404	49.1751	40.7069	37.1278	38.6176	76.9999	52.9299		45.0075	40.1235	27.9092	41.6473	35.8531	43.1144
MLT1H2-int		1.12276	0.886465	0.766219	1.88754	1.7648	1.3578	1.51209	2.04525	3.21122	12.3145	2.24547	2.00219	8.74644	3.55404	3.70477	4.0932	7.73595	6.04578		2.69915	2.65519	1.89787	3.07833	2.41424	3.67445
MLT1I		29.3873	41.1403	32.5539	60.5366	67.8352	45.1028	56.9153	50.3004	71.9308	242.723	67.0572	59.5517	123.082	107.674	102.195	108.576	206.869	147.982		112.02	98.3494	76.615	110.595	92.9215	113.769
MLT1I-int		1.67318	1.44896	1.41025	2.2401	3.50718	2.63179	2.31489	2.32398	5.11045	21.658	4.29908	2.6366	11.0162	14.4114	8.73978	9.0714	17.3508	13.6978		8.85294	11.9869	6.00075	14.0169	10.194	10.0292
MLT1J		73.506	100.391	84.1175	118.536	144.831	87.9638	134.015	110.286	160.541	412.752	149.128	131.719	309.079	292.57	285.632	305.028	451.847	368.155		310.112	303.874	248.602	297.673	275.284	322.988
MLT1J-int		6.62489	9.23004	8.13966	8.13758	11.754	6.00618	6.27222	6.67896	8.36322	39.818	8.57171	7.22508	21.0059	17.0188	16.506	20.1753	32.0606	24.1038		17.8493	12.0385	9.47544	12.5703	11.2445	14.5423
MLT1J1		14.6142	25.1877	21.7946	29.0914	37.318	22.211	28.1163	23.7563	35.5401	103.442	31.7148	28.2718	45.8754	44.181	43.7445	45.6009	80.172	65.1283		53.5416	46.6271	38.3772	42.4254	38.3384	50.5752
MLT1J1-int		4.32593	9.81105	10.6252	12.8689	16.9587	10.2087	9.63268	9.00407	11.9695	27.0545	12.3843	10.4717	10.7483	16.2291	13.8943	17.8007	25.7103	19.7112		19.6411	20.0115	12.2176	16.547	16.6451	19.5532
MLT1J2		42.7647	50.5834	40.964	45.3349	48.8775	33.1629	38.9939	42.5528	51.9717	164.109	50.6371	47.931	75.3487	65.6429	68.8733	73.5466	128.94	86.8847		73.2534	67.0872	49.827	74.2783	59.8367	71.1757
MLT1J2-int		1.85091	3.99641	3.67953	8.89438	7.05157	4.74393	3.35555	4.43943	6.72195	22.3545	5.98391	6.70147	9.86819	11.2443	10.0057	11.445	31.9539	17.8082		10.8841	8.86492	5.37612	8.52209	7.723	8.56788
MLT1K		54.4328	75.7337	58.163	102.767	116.663	83.3925	96.218	84.1394	142.999	425.463	118.051	105.776	281.677	263.099	249.431	248.223	444.136	330.036		247.302	234.561	175.158	264.342	217.243	253.741
MLT1K-int		0.533898	0.402959	0	0.859818	0.928998	0.955491	1.29988	0.957924	2.25903	5.06025	0.960648	1.02674	1.31956	1.33531	1.33873	1.3155	3.04325	1.80256		2.13305	2.07105	2.11158	2.10072	1.73059	2.54089
MLT1L		41.3795	56.0366	45.8246	65.2694	80.5434	57.4065	71.8352	66.4602	100.12	275.338	86.5569	78.3289	252.012	201.336	193.939	221.905	334.91	270.157		202.331	189.911	160.611	227.641	195.409	216.918
MLT1L-int		0	0.620086	0	0.527005	0.455169	0.419075	0	0	0.667328	2.59558	0.477224	0	1.23672	1.15113	0.947506	0.766037	1.31669	0.96739		0.796359	0.578828	0.650456	0.873508	0.742405	0.810948
MLT1M		5.10236	7.51779	5.76423	12.9688	11.7019	8.66647	9.3874	7.67233	12.9346	42.2349	12.264	9.78127	43.5086	37.5578	39.1631	47.8816	70.7923	58.9457		42.6043	38.19	40.1587	33.7724	43.3589	65.2181
MLT1M-int		0	0	0	0	0	0	0	0	0	0	0	0	0	0	0	0	0	0		0	0	0	0	0	0
MLT1N2		17.2764	18.8921	14.3413	25.535	27.7149	17.2823	24.8219	17.9963	30.128	116.567	27.1883	23.228	60.8003	54.6062	54.2208	49.1916	90.7735	67.7267		52.7424	47.5418	30.6516	53.3706	38.5554	44.4409
MLT1N2-int		0	0	0	0.59967	0.537699	0	0.411883	0.430563	0	1.45763	0.458077	0	1.82128	1.8075	1.72399	2.13767	2.26676	2.87608		2.15477	1.18267	1.30315	1.37758	1.24082	1.37171
MLT1O		13.9516	24.9492	15.8471	22.6283	25.7104	16.9809	20.9594	18.3833	33.6131	98.1686	29.0212	26.3899	60.3145	49.7081	50.6011	51.4099	94.4913	70.2599		49.5568	43.1322	34.2728	47.2243	38.0119	47.609
MLT1O-int		0	0	0	0	0	0	0	0	0	0	0	0	0	0	0	0	0	0		0	0	0	0	0	0
MLT2A1		6.90673	9.23473	7.96836	13.6017	13.9174	8.55918	13.8363	8.72458	13.9548	59.7133	13.5571	12.0902	23.7513	20.2518	18.8335	21.5049	37.7553	28.249		24.3056	23.0618	19.1333	23.1605	18.3305	22.519
MLT2A2		13.9952	18.9356	16.128	27.7977	30.3993	23.719	26.7266	21.2632	32.1449	123.978	29.9623	29.3394	39.5523	38.8509	35.8986	43.677	78.1562	60.2908		47.4631	48.3857	35.4133	42.1018	40.0221	46.1617
MLT2B1		9.44447	13.0748	11.0452	16.0981	20.2408	11.139	18.1329	17.378	21.6012	93.1068	19.6209	18.3609	31.6736	30.1935	27.9833	32.3683	59.6732	38.3694		31.1711	28.9806	23.2414	31.6302	26.7326	32.5809
MLT2B2		6.56696	6.96052	6.09188	9.49161	14.1716	8.13542	10.0928	8.81168	19.8551	44.4546	10.5357	9.58361	36.558	39.3642	45.5082	47.5475	75.0594	51.3197		35.6424	30.2941	23.4234	43.4423	31.1243	28.105
MLT2B3		28.8838	46.6989	41.3432	44.63	54.2091	35.7347	46.782	42.358	50.885	135.919	49.0564	53.0633	74.0668	72.6206	66.6918	77.6	105.514	92.7331		83.7432	88.1978	53.4192	82.9257	71.3449	76.1977
MLT2B4		28.9148	49.5242	38.1226	53.9346	63.2637	35.2898	58.5729	35.0158	47.0929	130.703	53.4138	47.3451	75.7436	83.2787	85.3755	102.972	152.187	130.346		88.6056	67.6579	63.9676	69.0073	60.2446	72.5757
MLT2B5		0.446535	1.20373	0.844333	1.49716	2.39464	1.3578	1.43382	2.45336	2.78408	10.6291	2.93948	2.48396	2.35215	3.23944	3.1268	2.65993	6.02621	3.85411		3.39406	3.67679	2.83685	4.64733	2.91963	3.27242
MLT2C1		5.17286	6.82159	5.22803	8.97249	11.4199	7.60805	10.1981	11.5314	18.4461	48.9198	14.2999	13.7364	26.695	24.8884	25.3331	23.0204	43.8751	32.3722		31.4978	30.9383	29.0087	30.6149	29.1061	37.1003
MLT2C2		3.30296	3.33072	2.62657	5.25261	5.53125	4.42543	5.46156	3.39689	6.92196	21.6446	6.40542	5.61989	15.9094	14.2015	14.1758	12.8169	24.6734	16.2323		10.5305	10.1392	5.83083	9.09669	8.2621	9.7334
MLT2D		14.7696	17.4127	16.2927	23.2536	27.9985	15.2376	20.8927	18.4566	34.5216	88.7525	23.3127	25.1092	37.7388	45.7131	40.5191	42.2735	84.2985	55.1175		43.4712	33.3854	26.8572	48.9914	35.2645	37.98
MLT2E		1.46538	1.18473	1.12177	2.2627	4.02929	4.29133	5.86201	5.35776	6.34624	10.4912	5.41739	4.87107	6.48675	6.95773	5.57785	5.67634	9.66446	8.03079		9.13112	9.63147	8.91152	11.8063	9.83112	11.3434
MLT2F		7.70233	12.767	11.9173	13.2454	17.4446	10.3159	14.4429	17.6363	15.3182	66.0175	22.0721	22.444	36.0671	39.2158	38.8845	40.9944	55.8995	48.0098		43.6146	42.8119	40.7454	40.7672	40.8236	48.885
MST-int		0.805591	0.796243	0.632782	1.67689	1.345	1.29075	0.91873	1.04493	2.26173	6.26556	2.4195	0.916339	5.80392	3.42178	3.32806	2.55024	5.14679	4.74059		2.03293	2.2158	3.38466	3.84962	3.03912	3.75665
MSTA		61.4365	83.0454	79.2086	120.274	142.309	87.4854	124.319	94.1181	175.755	422.513	126.923	110.597	223.854	244.929	222.484	207.537	388.839	298.265		229.398	226.167	234.865	288.629	250.754	285.464
MSTA-int		87.1083	131.609	116.143	115.769	148.079	83.5142	146.313	202.93	173.878	511.715	260.323	254.298	134.481	134.633	130.205	155.434	225.678	191.702		143.736	175.113	205.316	202.916	211.099	270.264
MSTA1		3.29427	6.70486	6.25324	7.70304	13.4442	8.39859	11.9805	9.59147	7.11078	19.7403	9.45313	7.38652	11.2923	18.3136	19.4424	23.1542	39.0033	26.1577		26.4495	23.7581	25.7605	20.3296	19.9364	21.153
MSTA1-int		0	0	0	0	0	0	0	0	0	0.902303	0	0	0	0	0	0	0.438211	0		0	0.749805	0	0.661947	0.400261	0.48121
MSTB		31.9463	40.9227	35.8904	62.2997	68.5741	39.2254	55.4458	43.408	85.4739	214.811	60.5258	55.8208	146.507	144.321	125.963	125.964	229.49	177.14		149.375	126.068	95.4287	130.801	112.418	126.333
MSTB-int		8.73141	13.61	11.5374	18.2971	20.4493	13.7792	16.0694	18.8835	21.1422	96.5491	20.7103	19.7748	32.7985	24.3116	26.877	32.4969	62.9805	43.1477		32.7496	28.3673	24.6384	30.2075	25.7618	38.3834
MSTB1		18.3501	23.0193	17.1238	31.5766	34.6933	25.4291	31.66	20.1965	45.6719	117.777	30.1228	25.0409	70.8405	60.6789	61.3428	58.5803	111.954	83.9366		63.4561	52.2263	40.8823	61.6417	47.2155	54.5632
MSTB1-int		3.15354	3.36267	2.76577	3.10919	2.84294	1.86069	2.80421	4.32691	4.86904	19.0449	6.0753	6.50361	7.78966	5.41429	6.30447	6.70877	9.7311	7.447		4.27036	3.66712	2.647	4.92303	3.72355	5.24076
MSTB2		8.06561	10.5764	7.45127	11.5694	13.7784	9.43757	13.1139	7.37189	17.7983	43.1482	14.1267	9.79113	20.7717	17.6927	18.1347	19.6726	38.1583	28.1555		20.3646	18.5638	12.0494	20.0161	15.0057	18.4696
MSTB2-int		0.443811	0	0	0.504703	0.612035	0.486127	0	0.540668	1.29383	6.90473	0.864975	0.612686	1.65263	1.18077	1.08313	1.12619	2.26652	1.50177		1.39814	0.723406	0	2.45203	0.478672	1.00865
MSTC		18.0119	18.5813	15.7872	22.1373	28.3596	15.1705	22.2303	15.3927	32.2562	69.8994	25.5284	24.6786	41.9299	41.7953	39.931	37.5671	67.9778	48.9151		38.8209	37.4992	33.3901	48.8698	40.1189	43.2084
MSTC-int		1.89976	4.22981	3.63086	6.02147	6.49599	2.56474	6.38436	4.81828	5.43636	23.8351	5.61983	5.52811	6.55422	5.61066	5.96436	6.21052	14.4372	10.168		7.14529	5.24588	3.91908	3.30703	3.67432	5.86765
MSTD		39.5964	42.561	38.063	51.3898	62.43	45.5608	58.2431	51.4496	82.5458	185.775	64.7505	57.223	115.536	103.297	98.2135	95.7038	179.905	130.329		105.165	89.566	84.0439	97.5374	85.6052	98.0526
MSTD-int		16.5559	26.5503	21.7458	25.6513	30.1726	11.9185	16.4809	14.5384	17.2784	57.9132	17.2805	15.4057	27.8374	21.3067	22.0457	28.5111	43.9355	31.3009		18.9435	15.934	10.4252	18.4057	12.7289	15.1734
OldhAT1		9.50754	15.3019	12.3226	14.6992	19.8257	13.2662	18.5017	19.547	21.7515	50.3339	21.9042	22.2668	251.62	248.442	252.571	231.045	277.1	249.557		213.532	232.048	245.271	225.242	234.668	249.166
ORSL		4.32549	4.32734	4.31068	3.81263	4.50901	3.36936	6.92789	5.23142	11.79	14.1362	5.66967	4.51012	15.0234	16.5993	12.6281	10.6483	19.0503	15.2815		12.6339	13.7677	11.37	15.5477	13.0801	13.7348
ORSL-2a		1.26319	2.96426	2.8652	2.48134	2.98053	3.16787	2.94512	3.53625	7.81288	7.88779	3.79202	3.7007	3.4282	4.47827	3.51243	5.33087	7.26712	6.02718		4.35096	5.13802	5.97449	5.55238	6.21434	7.46746
ORSL-2b		1.52798	1.72351	1.60347	2.01104	2.55844	1.9948	2.9531	2.50823	4.19111	9.13713	3.85262	3.57609	7.11786	7.30434	6.30518	5.06958	10.6001	8.59284		6.83896	7.85559	6.08632	8.45919	6.74699	7.26654
PABL_A		2.91757	1.88944	1.23631	2.91704	3.4417	2.22948	3.08188	2.19248	4.41692	13.1154	3.87096	3.0651	10.0497	8.80702	7.25925	6.8735	12.0671	9.31158		6.94849	5.65047	3.94322	7.51746	5.41873	5.43022
PABL_A-int		4.62065	5.26318	4.85874	4.91402	6.98145	4.22427	4.11986	3.2044	5.1731	15.8536	5.01999	3.85798	25.3376	18.6028	16.1932	15.5365	22.1083	19.3263		10.1018	8.97598	3.38898	5.67865	7.19523	7.78683
PABL_B		7.54032	4.78255	4.75049	4.35495	6.69461	7.34554	8.46125	4.0971	7.06025	14.4992	7.20052	5.39264	9.1137	10.7985	9.9897	8.37893	11.2646	9.88893		7.81092	9.94389	6.85859	8.17253	8.19436	9.06735
PABL_B-int		3.31869	5.40145	2.99277	6.52824	6.11989	6.22745	5.20695	2.64482	3.20739	19.0559	6.33823	4.15833	20.4472	5.75691	6.1376	4.8939	8.44799	6.1262		4.18951	2.71953	2.20793	2.97112	2.81413	3.97524
Penelope1_Vert		2.40397	4.30287	4.00251	5.14055	6.09032	1.92204	2.96601	2.98946	5.49495	7.97558	3.93686	3.09424	56.3793	40.916	49.774	56.8045	64.6854	60.5026		57.594	55.2762	49.0873	34.1046	51.5333	83.865
Plat_L3		14.0586	20.4562	16.9413	23.3594	29.5852	12.6229	19.5012	17.4477	26.7216	56.2819	23.7147	21.4319	113.028	97.0821	110.476	126.307	184.608	141.3		91.6366	60.7803	41.6026	53.2611	51.0758	66.571
PRIMA4-int		3.77616	5.64228	5.44597	7.96833	9.36286	6.21907	7.86634	6.55934	9.26913	22.2998	8.6841	9.10391	26.1174	25.5159	24.9863	29.4608	52.293	36.5436		26.0818	22.1525	24.628	24.0074	23.9106	25.5094
PRIMA4_LTR		1.05359	1.02498	0.950641	1.56421	2.02989	1.29075	2.07705	1.46892	3.35904	5.64322	2.46162	1.76194	3.80019	3.58345	2.98438	3.40522	6.32611	4.33988		3.39795	2.82939	1.79357	3.57939	2.54928	3.06826
PRIMA41-int		4.00207	6.1762	4.54932	7.15771	9.82584	5.73261	6.99099	3.3032	9.84013	30.238	5.98021	4.94912	18.0831	16.3301	13.0521	11.94	17.6739	21.4564		14.1948	9.00263	6.09106	9.95541	7.44359	9.40182
PRIMAX-int		0	0	0	0	0	0	0	0	0.529701	1.16319	0	0	2.48556	5.02269	4.39457	5.56784	10.3621	7.43682		5.19305	2.66941	1.68825	2.35615	1.98281	2.3527
PrimLTR79		0.765328	0.883818	0.707679	0.825641	0.961404	0.720809	1.03889	0.431213	0.982177	1.83116	0.778013	0.659011	1.06594	1.16794	1.242	0.987511	2.04953	1.82429		1.40403	1.03382	0.927508	0.785701	0.945589	1.38053
Ricksha		2.39353	3.7916	3.29541	4.2779	5.90974	3.59298	2.2784	3.37361	5.09409	13.117	4.16651	3.69555	4.26859	6.54135	4.95677	6.24735	16.8816	8.86804		6.6584	6.80562	3.52608	8.3706	6.81249	6.27577
Ricksha_0		2.29146	4.68915	3.82383	3.67848	7.50056	3.56214	3.89643	2.57324	4.2863	9.51419	3.80423	2.76956	4.84153	8.74009	7.84234	6.16803	13.8785	10.8886		9.17693	6.20867	5.35876	8.35207	6.66752	6.69789
Ricksha_a		0	0	0	0	0	0	0	0	0.463853	0.657522	0	0	0.637094	0.701427	0	0	0.901728	0.791858		0	0	0	0.714356	0	0
Ricksha_b		3.3697	2.7258	2.43207	2.97014	3.66552	4.20718	3.21191	2.58868	4.14104	6.12773	3.2724	3.04063	9.00807	19.7429	17.2699	24.4258	30.2535	27.8297		17.7112	11.5772	14.7042	12.6947	15.1015	18.5313
Ricksha_c		1.33746	2.64597	2.17001	2.91709	2.62197	2.81082	3.34863	2.3675	6.25988	18.0797	4.09322	2.97456	5.09438	4.68067	3.74002	3.61999	8.69002	5.74462		4.17633	4.95077	4.43515	5.40471	4.47894	4.5956
SVA_A		11.9333	9.54718	8.16391	17.1259	15.4693	15.6529	22.3932	14.421	23.4617	35.2853	20.9579	16.6988	46.7787	51.9003	44.8359	34.8237	53.5107	41.0324		42.2489	37.2224	33.754	40.4837	34.4189	33.2526
SVA_B		21.0064	22.9081	20.4236	36.5457	37.183	32.4686	39.2868	28.4951	36.9106	56.5079	34.6055	27.982	46.4713	45.014	39.9913	31.676	48.0176	37.1363		37.4842	34.6035	32.644	36.3578	28.7521	29.101
SVA_C		13.1725	15.9102	13.6219	26.8643	25.8999	32.0767	52.0894	31.8937	55.5995	55.7937	42.4543	33.7855	30.932	35.3322	31.914	26.0743	44.5673	35.8775		35.84	53.2381	48.5235	48.3097	44.7073	36.6118
SVA_D		61.9108	74.2171	64.2308	121.952	121.281	138.891	171.457	143	168.25	203.224	170.833	134.653	122.004	193.966	153.058	132.907	222.989	146.485		175.961	216.839	297.105	261.596	209.237	178.934
SVA_E		7.70837	9.45161	6.80442	14.2305	15.1078	14.6203	22.0137	18.7036	21.1836	21.8993	24.3966	18.9048	30.0373	42.0582	32.9035	22.1613	38.8476	33.5094		34.8593	32.4054	38.9814	39.7188	38.303	35.6937
SVA_F		12.1467	11.281	11.1941	21.568	25.2113	26.9331	30.6658	25.3258	31.3452	42.0779	32.3687	22.984	30.231	37.0669	32.271	28.3134	44.9587	35.0342		43.6858	41.7998	49.0037	50.2029	39.1098	33.6888
THE1-int		0.544769	0	0	0	0.683338	0	0.586495	0.613794	1.13923	6.95598	0.857618	0.926187	1.90749	0.590172	0.913328	0.908614	2.21094	1.53141		1.3026	0.693772	0	1.34088	0.868763	1.37083
THE1A		7.44685	15.0606	17.7102	16.171	22.3858	9.33699	11.6702	9.13289	19.3878	48.4638	12.5276	10.255	27.0017	31.5823	27.5539	30.3723	50.6855	37.1393		31.3799	30.1887	26.5286	42.5946	26.1889	26.9202
THE1A-int		39.4103	39.0915	32.4769	57.2705	66.8548	56.0477	66.9044	48.4913	64.4213	239.586	72.6186	65.9385	185.266	129.79	141.504	158.45	233.814	171.213		159.667	146.069	141.005	105.813	138.904	190.923
THE1B		68.2595	65.1397	55.9439	99.9995	119.581	72.9864	114.933	83.6224	167.483	415.726	117.179	103.006	228.303	212.913	189.552	191.139	358.483	274.582		210.203	223.585	184.007	252.577	199.256	230.523
THE1B-int		74.2774	93.451	82.5925	143.141	167.037	107.888	110.024	90.6296	159.385	610.808	128.224	121.494	248.642	305.969	232.003	222.597	387.718	320.848		229.194	186.689	142.76	246.591	193.164	230.111
THE1C		23.7788	32.0222	26.9214	44.2225	50.1866	31.0655	44.0278	32.2181	67.1	181.551	51.6035	42.4527	86.4614	70.3711	69.2272	71.5357	143.268	100.309		76.0948	69.6725	60.213	102.062	66.6734	77.7521
THE1C-int		85.1888	52.0232	54.1795	52.3449	55.8933	76.5046	160.016	88.2722	1343.92	360.918	262.554	104.698	40.3142	42.4607	36.0625	42.348	113.713	66.9007		60.9044	42.2611	27.4864	52.2974	38.7186	43.476
THE1D		32.0715	46.5508	41.6221	59.8893	80.8576	45.7992	53.089	42.107	84.8544	257.263	64.8433	54.6812	140.099	143.207	134.383	129.318	245.593	178.431		139.691	118.275	93.9181	147.244	111.168	126.482
THE1D-int		24.1007	45.7664	36.8486	42.0307	72.8141	37.6074	51.6224	43.1875	55.066	265.183	58.5363	46.4079	75.2697	57.9793	60.4834	68.3502	149.976	101.076		76.4602	61.1111	48.7836	57.6111	54.6218	64.4457
Tigger1		207.35	260.26	235.578	285.909	321.334	164.259	224.778	184.229	320.363	654.736	253.007	198.323	657.766	477.164	475.98	467.693	883.751	654.434		378.124	341.718	230.914	380.289	295.628	330.529
Tigger10		8.62616	8.24131	5.68582	8.91244	10.5812	7.79479	15.0239	14.8465	22.8168	34.4923	20.7538	20.1434	36.8511	25.9524	22.9126	22.1749	40.3984	34.9921		19.5091	20.8925	17.9609	28.0038	22.3807	26.774
Tigger11a		2.61044	5.33069	3.64552	2.35464	3.49612	2.33006	3.17882	3.37502	4.89711	8.84353	4.25	2.73073	13.0491	16.2493	14.1524	13.2807	19.3254	17.1459		12.5622	13.7418	13.2576	18.7916	13.1051	12.9396
Tigger12		3.64524	3.37931	3.02557	5.2802	5.47491	2.09537	4.13334	3.7868	7.58946	15.0545	6.81149	5.53004	44.0852	37.1936	32.6877	38.2306	48.0306	41.954		26.0729	33.8377	21.9334	38.466	32.2852	33.2302
Tigger12A		1.89927	1.73326	1.39894	3.25007	4.1005	1.76011	3.83681	3.01111	5.4108	12.0985	4.22487	3.86187	14.1176	9.37288	8.12431	7.35523	15.7527	11.0162		6.88189	5.94374	2.2285	7.10565	4.86771	5.47192
Tigger12c		2.3384	4.1871	2.60144	5.27089	5.071	2.93352	4.72881	4.24165	7.64988	17.4249	6.20414	6.39902	38.8112	28.3671	25.1582	23.1565	37.5267	32.547		18.7341	18.5043	14.0227	21.2316	17.9854	17.1018
Tigger13a		17.3477	26.8151	23.553	26.3478	32.1124	21.1043	32.3211	26.9265	42.1345	86.748	40.7916	32.0001	74.346	63.8139	56.9898	49.3917	96.8734	78.6133		45.8553	50.711	39.0325	57.4016	45.733	51.0241
Tigger14a		4.22836	5.10389	3.73674	6.38144	7.34817	4.67688	5.15725	6.9937	9.4658	22.0416	8.21685	8.73431	46.9163	63.9191	43.8065	44.1136	56.6236	55.8161		27.5465	31.3774	27.8456	65.7669	42.5702	31.817
Tigger15a		30.1086	35.1048	27.3789	36.3705	45.2558	21.7379	32.1764	32.7861	48.0548	98.0279	49.4727	43.3917	162.934	135.483	118.228	114.024	195.351	158.949		97.6296	108.024	73.1975	101.876	94.7984	110.485
Tigger16a		7.83235	10.3765	7.95105	9.35854	12.8294	5.21296	11.1262	9.8264	16.3896	34.2084	12.2659	9.34598	46.329	29.5287	33.2622	34.2587	58.8144	44.6301		34.5932	33.3909	22.4204	30.1663	30.4733	31.7802
Tigger16b		3.47923	6.55966	4.23782	6.78173	8.23803	4.17432	6.14594	5.99247	8.8955	19.636	8.3278	6.27568	76.7715	53.1724	48.2738	56.1478	74.384	59.4		39.2581	32.0131	23.0919	32.2405	28.7326	30.7588
Tigger17		2.78252	3.64527	3.11854	3.41486	3.35664	3.23526	2.36156	1.74994	4.59494	5.7969	2.98279	3.07291	12.7355	13.5531	14.9013	17.6685	18.947	14.8123		11.9258	14.7085	16.0517	12.3793	14.4155	15.959
Tigger17a		12.4	13.4742	10.1194	21.8407	23.3082	13.0584	17.6873	18.2303	32.9076	68.6535	25.7633	19.6849	103.598	83.6153	77.0558	85.6519	141.373	113.563		79.6059	87.6673	62.7117	94.3324	85.2968	92.5169
Tigger17b		0	0	0	0	0	0	0.50248	0	0.5297	2.63889	0.413227	0	0.802493	0.409056	0	1.23992	0.944543	0.655349		0.621425	0.869344	0	0.68748	0.566779	0.708106
Tigger17c		0.592689	0.997296	0.553746	0.970728	1.36396	1.25722	1.22266	0.972415	2.37342	5.37401	1.50814	1.25338	5.03191	3.47452	3.57407	3.33241	6.33059	4.97173		3.53362	2.46696	1.42462	2.40546	2.31492	3.20003
Tigger17d		1.65167	2.34019	1.74173	2.29698	3.6048	2.76589	2.32267	3.1186	3.04648	8.26236	3.2921	2.85842	7.20346	4.83191	4.05111	4.39347	8.74546	7.3962		4.21439	4.40556	2.61971	3.59705	3.104	4.57629
Tigger18a		6.53577	6.86009	4.76382	6.353	7.55999	4.28596	7.52066	5.80283	13.196	23.2459	9.69354	8.92278	26.8993	22.0494	18.5512	15.8129	30.3709	24.8401		14.3342	16.2655	10.9727	24.0548	16.4352	17.1527
Tigger19a		14.3132	16.4959	13.1753	22.5279	26.3412	19.9255	24.6222	21.4437	33.5703	64.7796	31.3415	26.7148	150.723	134.708	112.033	117.579	171.157	152.946		124.811	120.524	113.924	137.806	129.485	135.985
Tigger19b		27.9306	39.1888	33.2784	36.8114	43.4064	27.898	36.1514	38.7434	41.5957	76.8123	52.4814	47.996	180.875	151.807	151.011	145.972	195.964	171.474		125.868	130.514	108.233	133.752	129.102	145.592
Tigger1a_Art		1.71006	3.34386	3.25044	2.35073	3.57571	1.62601	3.11003	1.85737	4.66175	4.40391	2.9416	2.45312	4.72752	5.49218	4.49968	6.34554	9.1558	8.5511		4.99716	6.25786	4.18097	4.69663	4.98346	5.30696
Tigger1a_Mars		0	0	0	0	0	0	0	0	0	0.795465	0	0	0.963299	0.565911	0	0.412937	0.528899	0.549315		0	0.454928	0	0	0	0.426789
Tigger2		40.0488	50.3686	42.0184	58.5049	69.3196	35.152	51.574	42.0291	70.0542	122.329	61.1907	48.8961	141.219	113.425	107.415	114.857	188.746	148.603		101.469	97.2652	66.9203	89.3776	77.9964	92.8629
Tigger20a		7.85764	6.97983	4.88924	7.0772	9.33254	5.33063	9.67926	9.21613	10.4488	30.9804	10.8501	9.42314	47.8698	33.5479	34.3011	36.2155	57.6795	44.4443		33.6314	34.4857	27.121	31.5854	33.833	39.1622
Tigger21a		0.713256	0.688043	0	0.820352	0.837614	0	0.61008	0.546425	1.30327	2.9731	1.27255	0.890644	5.82228	5.66313	4.08193	3.19756	7.3889	5.04565		2.73058	3.63287	1.13051	2.50042	2.0939	3.05446
Tigger22N1		5.1385	6.31292	5.12954	4.83869	7.10043	4.34162	6.26814	6.52565	8.32582	19.2685	7.93217	6.08635	57.2517	43.1942	37.99	34.9758	47.1944	34.504		20.5518	23.9304	18.6282	20.5127	23.2267	24.9457
Tigger23a		1.31838	1.73856	1.24289	1.61801	1.84306	1.06277	1.37948	1.06921	4.02426	7.36325	2.08296	1.82935	17.8795	13.4642	13.8133	18.2937	24.4038	20.9969		18.2463	24.6248	23.3219	20.5978	22.8662	27.32
Tigger2a		15.6873	16.2776	14.6273	21.5228	27.7888	12.1196	23.2843	20.7835	45.4528	65.2595	27.6626	19.6671	75.4778	67.6392	60.8292	51.5738	99.5535	75.2377		55.6069	55.6539	56.5634	62.0839	52.9761	56.7015
Tigger2b_Pri		11.2606	18.3978	15.3495	16.1272	22.7403	9.24177	13.8423	11.3858	20.0748	36.2213	17.5699	13.5007	39.1422	37.024	31.3664	29.4565	53.7492	42.5751		27.9689	25.8558	20.5374	31.5501	26.289	29.5273
Tigger3		7.39066	10.79	8.80004	17.2325	16.6183	7.22485	8.57814	7.6426	12.7701	27.2602	10.0524	8.24597	42.2539	35.5099	31.7815	32.9054	54.9222	46.0754		27.2316	23.6941	14.8451	23.0464	19.3356	18.5176
Tigger3a		25.7286	32.472	26.6035	46.0132	50.6354	31.4973	43.3392	37.0532	63.8247	122.907	52.1435	46.2954	168.473	128.571	119.747	115.107	199.298	159.141		93.9764	94.913	57.5312	85.0196	78.9037	93.8531
Tigger3b		37.0105	44.1147	36.6441	64.7462	67.5626	36.7901	55.5711	41.8062	96.7514	170.769	64.1374	51.2707	190.576	144.255	131.543	121.749	229.68	181.665		94.8753	105.554	71.727	114.832	92.6709	100.78
Tigger3c		8.65204	10.2189	8.46064	16.6295	17.561	8.95412	13.2193	9.70202	15.5882	40.0868	13.8793	11.8071	60.5056	52.6741	46.5459	49.021	74.7871	61.1558		49.0494	75.6536	83.5144	79.5935	98.7884	107.83
Tigger3d		0.797724	1.18834	0.797031	1.23881	1.39996	0.888439	1.32733	2.11258	2.46818	4.75639	2.30436	1.60207	6.00508	6.10565	4.45153	3.62694	8.26186	6.36402		5.72305	6.34532	4.76721	6.69659	6.03636	5.50363
Tigger4		10.7699	17.2086	16.8385	18.9487	23.8858	9.20255	12.2451	8.80718	17.7853	52.7662	14.8085	11.8499	55.0859	47.8712	36.8885	38.185	64.9564	51.3255		29.9342	31.6431	25.1305	39.4242	30.6544	31.7313
Tigger4a		17.652	24.9186	18.8213	28.4538	30.7896	14.8406	20.7612	17.4477	34.6861	49.4123	28.4256	22.027	154.256	106.387	97.6731	97.3871	162.104	132.794		62.2176	60.8651	35.9072	58.2549	52.4057	57.5695
Tigger4b		16.6641	25.4819	22.2061	26.5	28.0688	14.7115	20.3612	20.0552	32.4322	49.7728	25.6673	21.5569	99.9303	97.3918	82.7771	68.8739	107.958	95.1824		55.7165	46.7489	35.2308	56.7467	44.767	47.4465
Tigger5		1.37544	2.44223	1.24744	2.52852	2.71519	1.10636	1.98123	1.78637	3.63081	8.60867	2.98687	2.4684	14.7931	14.2457	14.0799	14.3907	20.7737	19.7231		12.4927	11.4829	7.51266	9.35519	9.57203	11.6137
Tigger5b		5.71915	7.73756	6.91761	7.02866	9.47483	4.5763	6.8035	6.40308	9.35218	19.5062	8.36239	8.9637	33.9563	27.3256	22.436	22.3494	41.9344	33.0229		18.8	19.2472	10.0678	21.8005	18.2139	21.8689
Tigger6		0.763743	1.13193	0.736008	1.8698	1.96626	1.25722	1.95929	1.03578	3.68175	3.97292	2.53007	2.33724	4.7438	5.51218	4.30059	4.21039	6.80712	5.60956		3.75862	6.00161	4.29321	6.84871	5.57807	7.17045
Tigger6a		5.75033	5.30042	3.90429	5.99977	7.51413	5.21329	8.98021	6.05619	12.0786	21.9103	9.29279	7.22604	20.2723	17.102	14.4981	14.3193	27.5512	20.9895		11.5078	12.9959	9.56481	18.9893	13.6024	14.78
Tigger6b		0.601827	0.491014	0.666588	1.04374	1.17938	0	0.647681	0	1.20535	1.66924	0.72917	0.543944	3.69856	3.30848	3.0832	1.80975	4.49298	3.26189		1.79531	1.41969	0.855068	2.49944	1.39584	1.37323
Tigger7		16.4761	15.8326	13.1413	18.0353	20.7015	10.5439	14.19	9.78858	19.2913	43.078	16.5146	13.6085	81.855	72.184	69.4302	64.285	90.1941	80.1497		60.283	77.3381	81.9557	69.6521	79.0362	79.4723
Tigger8		4.11542	4.75853	4.10227	6.40976	6.8745	3.26878	6.38977	4.9995	12.4376	15.8182	5.80049	5.21492	30.8623	41.8931	43.4235	39.6029	58.0779	52.9568		38.5056	46.8089	38.5302	42.115	58.1415	64.5766
Tigger9a		3.9829	3.33657	2.69307	4.41677	4.46647	3.06763	4.469	4.00003	9.42476	17.292	6.25855	5.24427	20.9701	17.0776	16.6362	12.1437	22.5424	16.5934		9.22446	11.352	9.07058	17.063	10.9272	11.5334
Tigger9b		4.93792	12.7709	8.43728	6.58793	8.43351	5.07919	6.01502	6.4349	12.0679	21.6623	8.75747	5.24526	18.1321	14.6665	14.1709	13.6979	28.9416	20.5437		13.4573	12.1165	8.67862	12.9625	9.92386	11.7403
UCON100		0	0	0	0	0	0	0	0	0	0	0	0	0	0	0	0	0	0		0	0	0	0	0	0
UCON105		1.90646	2.5268	1.9044	2.57238	2.90369	1.55896	2.58405	3.16472	3.94348	9.82288	3.40347	3.61313	8.98788	6.9507	7.8127	6.92206	12.2048	10.0834		5.78715	5.65278	4.1013	6.13745	4.99696	6.61412
UCON11		0	0	0	0	0	0	0	0	0	0.542674	0	0	0	0	0	0	0	0		0	0	0	0	0	0
UCON14		0	0.417785	0	0.545695	0.537794	0.486127	0.47707	0.583297	0.74084	1.21441	1.00226	0.687062	1.3471	0.955198	0.853854	0.909539	2.02423	1.07624		0.936459	0.979669	0	0.487229	0.557181	0.882198
UCON2		0.92881	2.65451	3.07994	1.05637	1.71707	0.787861	0.506966	0.80861	2.0686	1.49397	0.622627	0	10.3124	13.9702	14.6898	12.0739	18.5078	15.9646		8.58757	9.18704	6.94655	6.23847	8.36681	7.69761
UCON21		0	0	0	0	0	0	0	0	0	0	0	0	0	0	0	0	0	0		0	0	0	0	0	0
UCON23		0	0.428835	0	0	0	0	0	0	0	0.682009	0	0	24.1687	19.1438	17.4427	22.2115	17.7626	15.8264		7.29289	10.2142	3.853	6.51194	7.28014	7.37367
UCON29		0.685211	0.515203	0	0.70228	0.795079	0	0.728358	0.564801	1.45937	3.27196	0.740343	0.47292	2.9763	1.71606	1.74877	1.75849	3.6858	2.83638		1.88165	1.50166	0	1.87131	1.2252	1.34485
UCON33		0	0	0	0.938353	0.682447	0.419075	0.483798	0	0.937529	0.964662	0.592393	0	2.56987	6.22152	3.84306	1.80686	4.68671	6.60353		1.61142	1.39376	0.805709	1.53534	1.11769	1.03626
UCON34		0.943474	1.27951	0.798235	1.27346	2.11771	1.15665	1.3691	1.42862	4.07897	3.35412	1.71965	1.39815	13.4837	15.6073	13.3549	13.03	25.1792	19.2144		14.0263	15.2469	11.9969	24.4125	15.4033	13.972
UCON37		0.527974	0.622574	0.607831	0.793634	1.14679	0.452601	0.942806	1.06307	0.983065	3.03883	1.14426	1.00268	5.81108	8.98232	6.81151	5.07278	6.60353	6.5459		5.84944	5.9651	7.0138	6.46673	6.00238	5.56026
UCON38		1.63781	2.53043	1.93135	1.94585	2.57312	0.553179	1.19603	1.02515	1.83796	4.55897	2.04281	1.54064	4.5308	3.56261	4.01456	4.4015	7.58087	6.1701		3.32484	2.35012	1.453	2.54928	2.62027	3.61339
UCON39		0	0	0	0	0	0	0	0	0.466649	0.828443	0	0	0.97855	0.567327	0.697781	0.702788	0.861462	0.791847		0	0	0	0.619382	0	0
UCON40		0	0.564134	0	0.663584	0.778269	0.452601	1.00128	0.991155	1.56404	2.29276	1.34527	1.08896	2.75899	2.18952	1.56056	3.02489	5.00407	2.67875		2.49253	1.86911	1.74429	4.64965	2.6632	2.87212
UCON44		2.92597	3.09296	3.14766	2.38947	4.07555	2.19562	3.81603	2.34684	3.88351	7.55799	4.21065	2.9122	6.04723	4.53561	4.17204	3.85735	12.9023	7.822		3.24493	2.88942	1.27615	3.4818	2.8722	2.88463
UCON49		0	0.408163	0	0	0.545217	0.419075	0.589357	0	0.586263	2.5056	0.818036	0.911449	1.79572	3.50712	2.31599	1.80956	4.61482	3.09961		1.26393	1.88723	1.65441	2.06757	2.24967	1.60884
UCON51		0	0	0	0.570584	0.697932	0	0	0	0	1.11966	0	0	1.13785	1.47228	5.28203	5.66763	5.43907	4.69692		2.22166	1.09674	2.77965	0.888418	1.82068	2.25436
UCON55		1.81691	3.2414	3.24345	2.18358	2.86486	0.834797	1.61936	1.34165	2.14618	4.00028	1.32573	1.84444	8.4057	9.88994	6.47567	8.57926	11.4459	12.9481		7.27898	6.28927	5.00529	4.8008	6.64	8.00962
UCON58		0.862389	0.824122	0.97258	0.821192	0.862014	0	0.474741	0.506157	1.20716	1.62997	0.682778	0.498115	4.4418	3.14484	3.63238	3.15531	4.82102	4.99807		3.01342	1.85483	1.78008	1.35247	1.97567	2.46532
UCON62		0	0	0	0	0	0	0	0	0	0	0	0	0	0	0	0	0	0		0	0	0	0	0	0
UCON69		0	0	0	0	0	0	0	0	0	0.635065	0	0	0	0	0	0.420202	1.0891	0.662818		0	0	0	0	0	0
UCON7		0	0	0	0	0	0	0	0	0	0.583096	0	0	0.669899	1.95625	1.57921	0.926887	2.20476	1.36087		1.26015	0.62854	0.439221	0.830847	0.459139	0.415139
UCON73		0.682897	0.680744	0.494245	0.876741	1.14555	0.75467	0.727142	1.06215	1.23023	2.76277	0.895291	1.00784	4.08844	4.02044	2.83979	3.00699	6.21737	4.67476		2.82686	4.33568	3.46019	5.09666	4.69325	4.5821
UCON78		0.40243	0	0	0	0.569227	0	0	0.406523	0.77204	2.34433	0.453354	0.446363	2.26502	1.63043	1.50382	1.07023	3.04205	2.30349		1.33919	1.17356	0.557732	1.41692	1.00121	1.65807
UCON8		0.629649	0.535194	0	0.591964	0.815647	0.720809	0	0.480659	0.951322	3.17688	0.438576	0.424469	7.96135	15.098	23.7637	18.0906	54.9681	30.1978		15.6786	11.5519	8.81184	8.00747	9.52196	9.75793
UCON80		0	0	0	0	0	0.402312	0	0	0.45338	1.03667	0.87407	0.802838	0	0	0	0	0	0		0	0	0	0	0	0
UCON81		0	0	0	0	0	0	0	0	0	0.518339	0	0	0	0	0	0	0	0		0	0	0	0	0	0
UCON83		0	0	0	0	0	0	0	0	0	0.524448	0	0	0.516337	0	0	0	0.464611	0		0	0	0	0	0	0
UCON86		0.568979	1.74268	1.18579	0.899514	1.14624	0.519653	0.677977	0.537355	0.947145	0.751526	0.542651	0.772663	1.76122	1.50816	1.93862	2.19512	3.41484	2.52834		1.94264	1.54151	0.482136	0.7011	1.03168	1.18924
UCON89		0	0	0	0	0	0	0	0	0	0.453141	0	0	2.07399	0.692182	0.911199	1.14752	0.768504	1.66259		1.05799	0	0	0.427533	0	0.507025
UCON97		0	0	0	0	0	0	0	0	0	0	0	0	0	0	0	0	0	0		0	0	0	0	0	0
UCON99		0	0	0	0	0	0	0	0	0	0	0	0	0	0	0	0	0	0		0	0	0	0	0	0
X1_DNA		2.66636	2.08202	1.62141	2.72907	2.80312	2.95062	3.49536	2.41209	4.60244	12.0648	4.28709	2.69373	23.7749	12.1543	10.0253	9.21346	13.1678	13.1745		8.09724	8.42014	3.53059	6.99187	5.16074	6.37315
X1_LINE		0	0	0	0	0.416027	0	0.510649	0	0.778453	1.55676	0	0	0.675143	0.691908	0.741206	0.660656	2.30301	0.728461		0	0	0	0.516963	0	0.460663
X1_LR		0	0	0	0	0	0	0	0	0	0	0	0	0	0	0	0	0	0		0	0	0	0	0	0
X10b_DNA		1.81588	2.04625	2.05513	1.73007	2.06401	1.15665	1.04946	1.08045	1.56665	3.61364	1.98228	1.67848	41.252	60.6236	36.9435	38.437	32.9198	36.218		30.4896	49.2942	37.8461	65.0696	51.4792	38.6645
X11_DNA		0.791033	0.687907	0.523291	1.02948	1.1179	1.32428	0.849862	0.693216	1.41543	2.38153	1.27214	0.941985	5.81819	4.8852	3.46664	2.95121	5.83333	4.5639		2.58352	1.75668	1.4736	3.08493	1.93433	1.92081
X12_DNA		6.31119	6.81919	4.91735	7.17356	8.93228	5.58744	8.05611	12.7601	12.2253	29.9527	13.3948	14.7183	85.3038	89.9436	69.7172	84.4352	108.394	117.888		68.9315	51.0659	43.1343	47.3479	48.2966	50.9636
X12_LINE		0.800175	2.90124	2.15834	1.22217	1.66378	0.720809	1.21613	1.77301	0.962319	4.07781	1.45286	1.31075	6.76013	5.92874	6.87924	9.30027	10.552	8.82894		8.65402	15.104	15.5358	10.9165	23.7006	42.0502
X13_LINE		1.13053	0.919387	0.703063	0.675356	0.762078	0.486127	0.777166	0.953071	1.28203	2.49107	0.766399	0.963618	1.44475	1.25191	1.06421	1.32183	1.78953	1.70955		1.49928	1.97674	1.40988	3.04659	1.30186	1.31999
X15_LINE		0.805246	1.07941	0.648119	0.805229	1.06522	1.14525	0.825141	0.654402	1.343	2.71493	1.03738	0.844478	11.4424	4.66851	4.60196	4.88951	4.96354	4.43273		2.92158	2.63007	2.74997	3.47036	2.76192	3.13528
X17_LINE		1.48166	1.93254	1.09349	2.60559	2.49035	1.69306	1.9499	2.25833	4.22763	10.6004	3.0168	2.45501	15.8163	14.6015	12.465	13.1798	24.8285	20.7963		16.0071	14.2039	13.0243	15.0782	15.869	17.1763
X2_LINE		0	0	0	0.492261	0.449978	0.553179	0	0	1.5629	2.68592	0.727909	0.479171	1.69011	0.66541	0.97153	1.47866	3.12738	1.89139		1.46606	1.05417	0.926272	1.30021	0.685399	1.08078
X20_LINE		0	0	0	0	0	0.452601	0.675639	0	0.997282	1.02713	0.573792	0.413505	1.04317	0.64736	0.402071	0	1.67715	1.61729		0.558213	0.996448	0.588918	1.08268	1.20943	1.10413
X21_LINE		0	0	0	0	0	0	0	0	0	0.584151	0	0	0.569838	0.425413	0	0	0.942851	0.470741		0	0	0	0	0	0
X22_DNA		0	0	0	0	0	0	0	0	0	0	0	0	0	0	0	0	0	0.448739		0	0	0	0	0	0
X23_DNA		0	0	0	0	0	0	0	0	0	0	0	0	0	0	0	0	0.406867	0		0	0	0	0	0	0
X24_DNA		0.725088	0.703571	0.899335	0.558356	1.3266	0.955491	1.51971	1.64735	1.79656	4.39927	1.36736	1.58336	2.9912	3.50463	2.63074	3.97193	7.36339	6.76639		5.253	10.2002	5.87622	7.74957	5.94339	4.75603
X24_LINE		1.04001	1.00872	0.693389	1.36486	1.30765	0.888439	1.4209	1.23595	2.58895	6.63776	1.65734	1.55024	10.0591	6.58573	7.2705	7.5049	11.7125	8.75346		5.18488	4.07618	2.13282	3.34443	2.92555	4.40341
X26_DNA		3.13481	9.15536	5.87162	4.4944	8.2928	3.3355	5.90757	6.97609	7.12218	14.1209	6.50546	5.29778	28.2109	22.5416	20.6856	17.373	27.229	23.4059		17.8279	19.7299	15.6524	22.4697	19.9981	18.7622
X2a_DNA		0.949552	1.96583	1.8533	1.15051	2.12205	0.854913	1.26826	2.92284	1.90347	4.42804	2.02063	2.62313	9.54271	10.7205	14.5432	12.1985	30.3674	14.2092		6.83033	6.74891	4.07993	4.69912	4.80481	6.1419
X2b_DNA		0.469857	0	0	0	0	0	0	0	0	1.09817	0.483378	0	3.11148	1.36165	2.37551	1.88827	3.64122	2.08654		1.01693	1.53839	1.00498	0.722746	1.36279	2.20707
X30_DNA		1.15863	2.67094	1.91	3.08896	3.88776	2.56474	3.90656	4.18139	5.34608	11.9163	5.70024	4.84797	15.7725	12.2624	10.185	13.8583	24.112	17.5817		12.1011	12.18	10.5664	16.2768	16.1473	17.9877
X32_DNA		2.07694	3.91079	2.44422	2.04142	3.16597	1.62601	2.37676	2.89744	3.65073	4.99943	3.66227	3.13392	37.2468	33.9001	24.3414	23.2043	30.9358	31.9549		15.3239	22.3646	13.8369	21.2268	17.7663	15.1481
X33a_DNA		0	0	0	0	0	0	0	0	0.529705	0.958316	0.537118	0	0.724893	0.671748	0	0.446596	1.78876	0.768947		0.447759	0.696458	0	0.683511	0.546913	0
X34_DNA		0	0	0	0	0	0	0	0	0	0.746619	0	0	0.427293	0	0	0	0.560238	0.463399		0	0	0	0	0	0
X4a_DNA		0.574708	0.795668	0.471163	0.550176	0.675977	0	0	0.599853	0.985213	2.81798	0.997548	0.741726	5.01455	4.85264	5.44717	4.73408	9.21016	8.04824		3.56236	3.33817	2.57156	3.34981	3.12604	3.26802
X4b_DNA		1.83853	1.8689	1.39933	3.1391	2.84383	1.39133	2.2968	1.90793	4.92201	9.37021	3.93023	2.94018	16.6437	11.3773	12.1121	12.5396	21.4779	17.4841		8.90003	7.51979	6.41249	16.436	9.42331	8.32905
X5a_DNA		1.69206	3.13022	2.31179	2.76916	2.93299	1.05607	1.92508	2.12481	3.07028	5.56335	2.77005	2.46477	30.2483	35.5734	38.3003	36.8539	27.7743	40.7002		80.1217	112.647	94.3245	75.7499	96.8982	135.047
X5B_LINE		0	0	0	0	0	0	0	0	0	1.29721	0.472393	0.453961	0.51598	0.559197	0.533075	0.788212	1.4866	0.852007		0.469081	0.462558	0	0.568568	0.455411	0.895551
X6a_DNA		4.9139	6.02671	5.57733	5.11288	6.97324	3.60404	5.32159	4.80023	10.6155	15.135	7.78489	6.06929	30.6478	28.9613	22.6765	20.9453	32.4074	26.4519		13.6524	15.2884	11.1034	19.5466	15.6639	15.0301
X6A_LINE		3.22681	3.09354	2.64268	4.40632	4.76109	3.12898	3.79382	2.89075	7.45181	10.6504	3.7614	3.59541	53.2087	59.5187	47.2488	52.5164	64.5339	64.0432		51.515	60.2094	47.7693	68.9229	61.6906	64.3088
X6b_DNA		2.49517	4.00902	2.7311	2.92029	4.76991	2.69884	3.72566	3.50803	5.80518	12.1907	4.70486	3.86392	26.1566	30.4676	25.6776	31.028	33.2117	30.2632		27.8043	29.3077	27.8216	27.7969	28.3561	32.4261
X6B_LINE		2.30233	2.49919	1.97934	2.83216	4.43234	2.29653	3.7719	3.47127	2.86141	10.2475	4.43078	3.5686	37.5064	33.2529	33.027	36.6948	41.2281	37.728		29.2036	32.2021	23.2404	26.3441	27.3201	31.1609
X7A_LINE		3.96026	5.0299	4.27508	4.34681	5.67067	3.01667	4.40622	3.42127	6.47351	13.895	5.50086	4.55554	19.4342	14.0678	13.3248	12.2991	19.4915	15.9246		10.5133	7.85003	4.29677	7.67332	6.64116	8.01584
X7B_LINE		3.82805	2.78662	1.92437	2.2518	3.82586	2.2744	2.76694	2.32325	3.74729	9.72906	3.4945	2.65792	17.2907	13.6892	12.1734	10.5537	17.7353	14.3219		8.83808	8.60324	3.56913	7.78164	6.44534	7.92614
X7C_LINE		1.68589	1.45475	1.05868	2.43498	2.50916	1.69306	1.9135	2.13946	2.67587	6.57347	2.40892	2.47595	17.7629	12.6014	12.5434	12.4274	15.7911	14.6598		10.5015	7.63793	5.06266	5.64204	6.56312	7.70046
X7D_LINE		0	0	0	0	0	0	0	0	0	0	0	0	0	0	0	0	0.505436	0		0	0	0	0	0	0
X8_LINE		0	0	0	0	0	0	0	0	1.46556	1.61168	0.456819	0	7.42065	11.9271	9.59204	3.45072	4.56852	5.27095		4.61773	5.83673	2.45329	2.9367	2.25066	2.76423
X9_LINE		1.21572	1.63587	1.23559	1.31837	1.55868	1.15665	1.15726	1.40088	2.29486	5.57897	1.46789	1.32517	45.643	76.8388	108.465	230.199	305.506	239.591		260.288	104.815	97.1455	69.0534	97.27	110.961
X9a_DNA		1.91993	1.98808	1.46279	2.01777	2.46891	1.05607	1.66411	3.27763	4.33206	10.919	3.6424	3.38329	14.6283	13.1458	16.0424	25.7808	35.0165	25.563		29.2356	49.6016	43.0078	20.78	38.951	67.3817
X9b_DNA		1.8512	5.07934	3.84258	3.48094	5.60944	2.16243	3.38299	3.79498	4.3274	8.2095	3.76432	3.12759	41.8557	44.9192	31.6504	32.5358	44.4287	39.0854		22.6978	33.7209	29.0123	48.0256	41.5186	35.5778
Zaphod		7.17878	7.10132	6.68603	7.43407	9.97065	5.28034	6.31469	4.71496	9.76355	30.086	6.70484	6.21737	19.0139	21.6743	17.3862	20.0119	29.5299	23.4043		15.3888	13.6361	10.4993	19.508	13.2565	14.5283
Zaphod2		5.47207	4.39766	3.84174	3.75798	5.14592	3.30231	5.03044	3.65945	4.75084	11.7686	5.12855	3.41998	8.65087	11.8434	11.4937	11.8716	17.2104	12.581		10.5915	12.4172	13.6028	12.8987	11.0148	11.9558
Zaphod3		3.63925	5.00373	4.84802	5.00572	9.11932	3.77167	5.51803	3.70067	6.14007	16.1889	6.14436	4.68821	13.2282	16.7286	14.3477	13.2875	21.4558	16.9356		13.6364	17.9083	15.6277	15.7861	16.0159	19.5049
Zaphod4a		0.635409	0.51429	0.448289	0.89331	0.84013	0	0.527428	0.815715	2.00036	5.04717	1.32858	0.73528	4.51562	5.16283	3.53417	3.01611	6.56116	4.23374		4.03292	4.03885	3.86284	6.98864	3.91286	3.58674
Zaphod5a		0	0	0	0	0	0	0	0	0	1.45285	0	0	2.96987	2.76675	1.91568	2.3449	2.7348	2.65548		2.2833	2.53868	0.706702	1.35281	2.24376	2.55696
Zaphod5b		0	0	0	0	0	0	0	0	0	0	0	0	0	0	0	0	0	0		0	0	0	0	0	0

## Sheet: CB_TE_Subfam_CPM_Exp
TE.subfam	BS.mean.1	BS.mean.2A	BS.mean.2B	BS.mean.3A	BS.mean.3B	BS.mean.4	BS.mean.5	BS.mean.6	BS.mean.7	BS.mean.8	BS.mean.9	BS.mean.10	BS.mean.11	CM.mean.1	CM.mean.2A	CM.mean.2B	CM.mean.3A	CM.mean.3B	CM.mean.4	CM.mean.5	CM.mean.6	CM.mean.7	CM.mean.8	CM.mean.9	CM.mean.10	CM.mean.11
Alu			9.43292	9.02519	15.3575	15.3931	38.5851	10.6081	24.5362	32.0244	13.2445	26.2887	17.9752	78.5721	80.0786	77.274	70.8334	66.957			55.6016	69.4587	67.708	74.6509	66.5002	69.3105
AluJb			843.527	1167.7	1297.05	1466.14	3748.59	1108.4	1920.09	2606.16	1178.96	2344.71	1608.72	3684.32	3677.91	3638.12	3249.58	3380.15			2786.15	3800.48	3217.33	3798.36	3405.33	3595.26
AluJo			296.052	399.777	468.243	531.424	1297.39	374.056	699.477	949.55	399.166	837.044	568.312	1308.3	1393.94	1336.35	1188.22	1267.37			1030.22	1420.82	1208.95	1417.95	1313.35	1366.35
AluJr			744.9	1039.22	1248.3	1367.17	3304.63	1002.1	1847.54	2487.37	1093.53	2208.09	1482.06	3500.11	3496.74	3491.86	3075.58	3159.37			2620.48	3575.28	3046.28	3659.32	3320.55	3457.46
AluJr4			74.5555	104.492	121.308	134.032	301.295	93.7837	175.738	234.267	97.1565	205.57	132.45	360.703	350.228	361.6	310.389	319.992			260.248	360.261	307.98	367.582	329.706	335.834
AluSc			285.661	345.657	309.237	390.382	1344.19	353.969	545.514	702.914	356.032	607.867	482.635	1014.87	1148.18	1072.36	954.312	1055.16			869.308	1174.14	946.99	1040.51	890.737	970.412
AluSc5			25.5294	30.6764	33.3661	36.5528	130.317	32.3051	54.5379	71.8525	30.139	56.5032	44.1492	89.8409	100.103	92.9729	85.356	91.9245			70.1927	103.792	80.8707	89.3244	80.8179	88.8226
AluSc8			149.776	180.806	168.679	215.768	782.903	202.45	308.484	396.793	208.127	329.468	264.18	505.027	580.581	524.524	500.496	525.52			442.345	626.741	507.311	550.265	481.077	522.137
AluSg			368.657	447.905	394.661	498.87	1776.59	464.864	746.46	953.442	471.609	806.865	663.937	1288.25	1476.6	1287.06	1221.63	1276.19			1077.1	1508.75	1217.66	1397.92	1203.84	1301.34
AluSg4			80.6382	99.1034	92.4505	117.733	415.808	111.042	181.351	234.213	112.381	196.241	151.228	274.66	318.453	276.27	254.776	290.006			247.405	361.428	278.671	322.7	282.346	299.43
AluSg7			43.867	51.462	49.5341	66.6278	223.272	56.1288	83.6771	114.344	55.9149	95.9537	73.6549	179.431	179.734	155.979	145.888	156.89			132.11	185.369	147.601	163.599	140.501	152.868
AluSp			532.634	663.929	600.292	751.394	2888.89	719.259	1125.33	1478.68	738.622	1269.12	997.631	1932.1	2154.15	1938.28	1827.55	1923.04			1652.9	2328.98	1933.76	2153.9	1875.4	2024.7
AluSq			95.0775	121.767	119.799	146.653	509.441	130.943	192.985	260.416	124.916	224.444	173.355	396.769	463.919	420.096	401.854	410.62			313.075	449.098	376.82	415.038	371.116	403.467
AluSq10			13.7623	14.3684	10.5393	14.9271	48.0413	11.7897	18.1925	23.9465	11.2121	19.1912	15.1895	31.276	32.3642	30.8839	28.8795	30.3361			21.7607	23.8001	20.5984	24.9059	20.6278	23.0116
AluSq2			382.354	490.709	450.272	561.522	1921.98	501.428	779.384	1023.35	518.11	877.233	680.145	1461.91	1563.58	1432.34	1354.97	1403.98			1228.07	1710.37	1421.57	1582.27	1361.56	1460.12
AluSq4			7.34316	11.1698	11.5666	14.0221	55.8661	13.8089	22.9824	29.6357	12.6917	26.2087	19.3752	49.0897	56.6121	56.381	52.226	55.2524			37.6255	57.4812	53.9647	59.9541	51.0671	52.1738
AluSx			983.7	1320.04	1159.78	1367.46	4596.71	1254.78	1931.15	2593.47	1279	2370.41	1791.65	3534.73	3840.9	3506.31	3281.95	3424.71			2923.24	4005.32	3289.57	3690.71	3306.84	3562.73
AluSx1			896.008	1060.49	954.385	1171.78	4158.81	1035.08	1647.91	2219.51	1045.33	1901.1	1453.66	3029.8	3496.9	3153.17	2947.46	3117.65			2546.21	3605.79	2910.72	3288.02	2890.64	3127.89
AluSx3			223.982	288.013	296.384	346.55	1234.94	300.021	495.238	672.473	311.593	576.861	432.33	952.741	1050.31	962.977	895.196	939.492			783.007	1078.64	877.599	1011.66	892.29	969.925
AluSx4			81.9008	99.828	93.4006	114.46	433.959	104.949	172.892	225.161	109.053	199.089	146.398	278.725	306.405	275.897	253.129	280.331			227.255	331.682	260.582	301.249	261.789	287.536
AluSz			833.857	1095.92	1091.32	1316.07	4343.13	1151.67	1852.34	2496.44	1134.11	2178.82	1624.92	3363.39	3589.82	3435.54	3141.33	3256.31			2639.86	3732.07	3118.35	3553.26	3140.08	3351.92
AluSz6			298.994	389.84	414.073	484.2	1404.77	382.706	640.105	884.569	385.819	796.87	544.281	1233.71	1251.73	1225.31	1092.8	1162.83			909.997	1237.73	1065.92	1248.63	1081.37	1151.39
AluY			603.341	715.516	629.592	804.735	3368.33	790.337	1208.81	1559.85	820.493	1300.47	1006.66	1822.56	2092.28	1821.57	1754.18	1912.74			1610.15	2410.38	1724.01	2005.68	1690.94	1897.2
AluYa5			15.8072	14.499	12.0411	14.4292	72.197	20.7641	26.0876	28.5616	17.91	23.7993	18.8366	22.4393	30.4199	24.5012	23.0697	28.2248			26.1806	42.1914	28.2811	28.4635	23.7253	27.5635
AluYa8			0.416246	0.78716	1.47375	1.69546	4.56106	0.958587	1.32597	1.72808	0.843821	1.21863	0.950007	7.70071	6.00802	7.77753	8.61514	7.32426			5.75147	5.88314	6.62011	5.91114	4.91374	5.37647
AluYb8			7.61895	8.21696	8.9293	9.66621	45.9016	11.8769	13.763	17.0134	9.79539	13.9689	10.1069	17.9814	19.2398	17.1301	16.9181	19.1384			17.9089	26.6259	17.7832	17.7832	15.1792	17.4282
AluYb9			0.754256	0.684627	1.16699	1.12392	6.12051	1.55869	1.46525	2.5574	1.6776	1.46037	1.19487	2.07803	2.25393	1.70529	1.65481	2.02901			2.29954	3.37456	1.92809	2.3917	1.54482	2.18967
AluYc			26.524	28.3281	28.6627	35.4399	144.394	34.5386	50.514	66.6728	33.4661	58.3342	42.5658	78.8062	94.6417	91.6639	87.1845	104.779			83.1278	113.041	76.0477	104.744	80.0775	91.736
AluYc3			4.24346	3.84669	4.59112	4.39134	19.8427	6.40597	8.4487	12.4323	7.39259	9.0153	7.04295	17.2882	20.9538	14.5471	14.3999	17.7009			12.4901	18.3373	13.5046	15.5188	12.9166	15.0349
AluYd8			0.808249	0	0.603251	0.607094	2.48706	0.798389	1.38422	1.71048	0.942013	1.10625	0.847254	1.3965	1.28843	1.20608	2.13031	1.46478			1.75335	3.81043	1.95257	2.14338	1.85046	1.60233
AluYe5			4.39351	5.25822	6.00513	6.42245	35.2585	7.45535	13.5265	15.6541	7.44208	12.6211	9.14227	11.0852	10.8111	10.6516	9.47602	11.0092			11.0548	16.8272	10.6834	11.8489	9.98605	12.0637
AluYe6			0.679204	1.27167	0.800809	1.13912	6.75757	2.01462	1.46675	3.00922	1.29296	2.30424	1.67833	1.99385	2.63679	1.86885	1.57593	1.62598			1.99424	3.34284	2.19438	2.51986	2.40469	2.46029
AluYf1			14.3221	16.9755	15.3734	16.5261	65.6136	16.1251	25.149	29.8644	15.9604	25.5615	19.7809	41.073	49.6036	42.0419	38.3274	42.7543			38.2542	50.4579	38.9082	46.8455	36.9652	43.5761
AluYg6			6.09989	6.00707	7.23839	4.84441	17.2621	5.57647	5.80754	6.80977	5.13585	5.36335	5.01546	8.0766	8.54523	9.18653	8.44365	8.99422			6.76922	9.21178	8.16962	7.35877	7.38955	7.18308
AluYh3			2.04127	2.57406	2.3318	3.42139	15.0413	3.29616	5.46077	7.46228	2.60132	5.86626	4.5298	11.1496	14.8385	10.6843	11.4644	11.1001			14.3359	14.7791	11.4243	12.484	10.0842	12.8468
AluYh3a3			0.644211	0.929175	1.58544	1.32934	5.27158	1.40539	1.96638	3.17038	1.48368	2.70701	1.65179	4.38661	7.37978	5.56995	5.70367	7.16871			8.02702	13.1122	9.77769	12.3197	11.1689	12.7492
AluYh7			1.26821	1.57383	2.28109	2.40528	9.71928	2.62125	3.74988	4.65523	2.0804	4.48757	2.94079	6.0705	8.65161	6.27947	4.66521	6.17107			5.15665	7.67071	4.86959	5.60443	5.81848	6.02026
AluYh9			0	0	0.426227	0	1.19812	0.479698	1.00176	0.880997	0	0.674601	0.424519	0.95033	1.08331	0.744179	0.815813	0.861074			0.774714	2.40434	0.811009	1.14328	1.02265	1.04636
AluYi6			2.29954	1.96107	1.9706	2.57102	5.99387	2.45011	3.20994	3.30728	2.81747	2.86436	2.2264	4.62094	4.91814	5.23373	5.62242	5.57346			4.1749	6.22356	4.90197	6.18079	4.422	5.50297
AluYi6_4d			0	0	0	0	0.579883	0	0.457761	0	0	0	0	0.944107	0.843909	0.798313	0.900338	0.788862			0.490085	1.03157	0.86553	1.12337	0.695426	0.793165
AluYj4			15.7608	18.7759	17.4576	21.4372	79.5141	22.9561	37.9074	39.892	23.8615	33.1113	26.215	44.0397	57.1886	45.5719	48.0242	55.2451			42.5367	64.0033	45.5793	50.3308	44.511	49.029
AluYk11			0.549417	0.802588	0.666096	1.1934	3.92319	1.23673	1.56692	1.30688	1.10186	1.28627	1.07697	2.902	2.54632	2.73223	2.96282	2.61447			2.25742	3.31072	2.94151	3.42571	2.98585	2.95322
AluYk12			0	0	0	0	1.33411	0	0	0	0	0	0	0.786514	0.700581	0.616634	0.437633	0.663966			0.435518	0.69825	0.631951	0.648773	0.456951	0.655749
AluYk2			42.7962	52.2843	42.6588	56.8456	222.92	57.2077	87.9143	108.72	62.5231	90.5722	70.3642	119.416	134.397	124.91	122.682	133.271			120.211	163.928	119.622	148.01	122.41	131.846
AluYk3			38.7624	48.2548	44.7909	51.7169	204.136	53.2104	68.3962	89.376	47.9545	73.0769	53.5538	91.4078	108.158	89.8707	85.0981	93.9072			82.2738	108.706	80.6465	96.0677	80.1478	88.5926
AluYk4			6.81646	9.8934	8.17702	7.92389	34.1421	8.2028	11.8163	15.1369	8.15148	12.649	10.2079	15.9487	14.5899	14.6379	13.8061	13.98			11.4959	18.6673	12.7412	12.7377	11.5961	12.5136
AluYm1			31.2239	36.6374	31.3277	39.8013	160.998	41.2777	58.5901	76.6311	43.9656	62.627	51.1054	77.3847	91.0209	79.4826	78.0781	85.4961			78.3429	114.663	78.0532	92.0412	76.8084	91.3242
AmnSINE1			8.83839	10.7858	10.1025	13.3407	21.6985	9.29933	14.1457	18.3276	7.75529	17.8684	11.3719	86.2381	105.088	122.374	121.244	106.799			86.2398	99.4259	86.2686	90.8757	90.253	93.9483
AmnSINE2			4.9725	8.98864	5.98896	6.31808	10.4977	4.36691	8.71549	9.17694	3.39374	7.94673	5.80221	18.2459	33.0943	32.5155	26.7505	29.9484			26.5604	39.2802	41.1358	42.1912	39.8751	39.0092
Arthur1			4.54698	3.01021	7.10897	8.59606	20.7531	9.72104	13.1428	15.7395	8.71847	13.1698	9.16607	16.1926	19.842	21.918	19.5025	16.4019			21.9422	30.6929	32.839	28.1036	29.684	30.3739
Arthur1A			2.86267	2.69549	4.24671	4.41745	11.0998	2.51719	4.79327	5.88132	2.51724	6.1419	3.50476	25.93	17.2753	17.1338	14.2231	14.5723			14.32	15.2896	13.1478	15.8576	14.6245	14.6379
Arthur1B			8.03705	7.25818	12.0305	16.7642	23.0136	7.16581	12.6101	14.7776	8.03632	13.7613	8.72231	19.7189	26.1851	30.3953	28.7296	26.5755			26.8232	29.6548	23.7394	28.8196	28.3844	28.8532
Arthur1C			1.50353	2.15057	4.83752	4.98776	7.77078	3.43731	4.89388	5.17923	2.85063	5.01283	3.29374	6.34071	6.03992	6.84521	6.05988	6.12332			6.76879	8.42572	6.76552	7.443	6.41403	6.58161
Arthur2			3.46534	2.54203	5.13588	5.17212	8.12049	3.67184	6.53217	7.20526	3.28438	6.05709	3.65852	17.3578	19.6101	22.7006	19.2008	16.0963			13.0652	19.2098	18.8771	18.8147	18.9051	19.6078
BLACKJACK			3.83043	3.25359	7.7312	10.0122	16.802	5.05249	9.39348	10.7831	5.00458	9.57873	5.53016	27.4883	26.0278	26.5306	19.7266	18.9177			17.8716	19.7057	21.6327	25.1728	24.6132	23.1278
Chap1_Mam			1.45626	1.46651	2.34892	3.19703	4.83647	1.46091	3.27563	4.34113	2.12668	3.98473	2.66174	8.29078	8.4547	10.8535	8.63795	8.37691			7.01766	7.68087	7.93071	9.1417	8.63693	8.83607
Chap1a_Mam			5.82117	3.61079	8.27814	9.39843	14.6677	7.04959	12.4397	17.1771	6.91967	15.776	9.86616	21.2801	21.3095	25.1474	22.3847	18.7251			17.9367	23.4814	27.6272	26.0671	27.2093	27.9328
Charlie1			31.1701	16.5299	36.4035	36.4577	51.3005	25.088	40.6144	47.5842	20.1567	43.765	28.4014	71.3275	78.048	79.6551	71.0953	67.0198			57.7063	85.9215	87.5579	81.1842	82.0192	84.0861
Charlie10			10.2827	6.96047	17.858	15.8412	19.114	10.7485	11.4431	15.3307	8.57136	15.5886	9.80661	30.1648	43.4918	31.7001	29.1821	27.0209			28.7979	31.1038	32.2132	27.5374	27.3071	29.8002
Charlie10a			0.90164	1.28996	1.74224	2.18798	3.12502	1.12995	2.29804	2.79654	0.89916	2.64934	1.52211	19.684	11.8069	10.8946	9.93186	10.1398			6.92566	8.42083	7.73727	8.12791	9.26585	8.50554
Charlie10b			0.766841	1.0319	1.44668	1.59918	3.60841	0.973431	2.13889	2.76497	0.7824	2.39839	0.981372	6.33377	5.01342	5.67306	4.39635	4.85067			4.01768	4.07257	3.8953	4.95833	4.50896	4.58727
Charlie11			0	0	0.420005	0.848755	1.83449	0.505202	0.844886	0.945594	0	0.89049	0	1.9489	2.65172	1.99848	1.68357	1.55957			1.90133	2.64907	2.71186	1.8087	1.58732	2.2301
Charlie12			4.82129	2.03506	4.55783	5.06413	3.41732	4.5372	3.10136	3.85938	2.30392	3.50263	3.58226	4.61127	5.3556	4.8105	5.61812	3.79553			4.34989	6.45536	8.34532	6.47554	6.89453	7.15438
Charlie13a			3.0689	3.13055	5.22673	5.6597	10.3517	3.84424	7.65246	7.26077	4.01026	6.97634	4.06185	17.0662	14.6592	16.8701	15.0692	12.6382			12.5499	14.9753	15.5887	15.8782	13.6557	14.1334
Charlie13b			0.955459	0.838188	2.00669	2.87477	6.01287	2.39905	4.03773	5.35827	2.15735	4.36244	2.87136	9.89738	9.05506	7.75436	7.13617	5.94151			7.09075	10.7643	11.032	10.5192	10.3661	10.2573
Charlie14a			0.673143	0.403073	1.10415	1.63646	2.55715	0.62501	1.60178	2.53321	0.903215	2.49132	1.09347	9.74485	10.8341	9.78942	7.85095	6.26432			6.07378	9.29537	8.01571	6.98604	6.61187	6.89155
Charlie15a			22.5392	22.3646	27.9434	32.291	47.3314	21.9125	43.0992	45.6755	27.3772	44.0265	33.2615	110.201	96.2398	119.87	106.751	98.6885			90.3522	120.249	107.27	124.506	120.652	115.336
Charlie15b			10.3725	8.00184	15.4157	16.0071	24.2869	11.3148	21.3188	30.0499	15.5465	27.6346	19.5718	45.5242	43.4021	50.0567	45.5945	40.6734			37.8166	41.7689	47.9231	47.7408	47.8501	47.0996
Charlie16			6.00085	5.2635	8.88637	10.6475	17.066	6.86049	15.1765	15.6821	8.61394	15.7468	9.80386	37.3376	37.3523	44.7754	40.4075	38.7111			29.0378	46.3938	50.9864	50.0445	49.2603	47.5132
Charlie16a			4.77421	6.09222	9.69433	11.6651	22.0522	8.36008	16.7128	17.0144	7.61416	16.7149	12.5136	42.2814	48.7518	58.9549	60.4996	53.3988			33.153	35.2568	37.3369	40.3053	41.4036	38.6033
Charlie17			7.982	6.62137	10.189	10.2461	9.8494	6.07822	9.9761	9.94213	4.75616	8.81079	5.9463	44.6246	39.1622	41.885	36.3537	35.1289			37.2739	48.7827	55.1468	40.5941	44.3235	39.0748
Charlie17a			3.2395	4.25039	6.33118	7.66302	19.0505	5.52639	11.4378	13.7753	5.97396	13.0592	7.78378	23.9789	23.0921	25.8045	22.408	24.9872			23.6012	35.2813	30.5473	35.4176	35.2175	34.6385
Charlie17b			5.36051	4.66097	6.33118	6.55764	8.91498	4.22665	6.227	6.35001	4.99876	5.89811	6.03848	6.70745	7.73972	11.1094	9.62076	9.1437			9.14781	13.3798	10.3164	13.027	13.8734	12.6207
Charlie18a			14.9813	11.2528	21.8508	19.4151	25.1969	15.6929	29.2305	30.784	16.222	29.5856	18.9212	77.2619	69.6269	81.21	70.523	54.0336			56.3509	66.9023	80.284	77.8436	74.7546	75.1141
Charlie19a			6.56051	7.35403	11.5635	12.2028	20.9178	8.49131	20.0708	21.6051	8.60532	20.6939	13.0611	39.5398	44.4566	49.9112	40.3603	42.1429			52.2993	78.128	105.592	86.0229	79.8813	79.695
Charlie1a			41.2477	28.5341	70.0602	70.8696	116.63	48.0723	88.2532	111.448	41.5414	100.73	58.7393	215.864	195.686	210.866	170.733	147.962			117.307	164.335	191.899	199.992	195.969	197.31
Charlie1b			10.9883	9.86978	19.0539	19.4504	38.5184	17.5514	31.6417	38.0373	15.2569	34.9286	21.5715	72.6073	78.5767	77.1528	65.2011	63.0795			60.0292	84.5788	98.0774	85.6273	82.7511	86.9168
Charlie20a			4.78325	3.947	7.31119	8.49479	10.751	4.5185	9.93012	11.2772	5.58738	11.3005	6.65374	17.8036	14.2074	16.157	13.6782	11.2294			9.10239	13.1561	14.6207	15.4645	15.2244	15.9959
Charlie21a			3.82242	2.69971	6.6423	7.70856	12.44	5.01675	10.2346	11.4852	5.79918	8.87167	5.99548	12.5067	16.6597	15.8412	13.6174	13.6717			14.3209	28.716	25.7595	22.6578	24.4321	22.8881
Charlie22a			2.81337	3.26513	5.48059	5.77489	11.0297	3.19173	9.94539	11.3371	4.99306	10.8032	6.33674	26.0431	26.1558	33.8518	30.3512	24.4094			17.0421	20.7723	26.1934	30.8383	29.8133	27.8051
Charlie23a			3.99521	4.26652	7.38337	7.52536	14.9837	5.8698	14.4902	14.951	5.71613	14.2834	8.16853	24.0854	26.6547	28.3339	23.0335	22.4607			19.66	33.4832	37.4518	36.6102	39.5898	35.8532
Charlie24			5.21735	5.62234	6.97363	9.32535	18.0037	5.32251	10.8831	13.9787	6.9695	11.7928	7.54782	30.2814	26.2798	30.1574	25.1221	22.9591			21.4907	28.7989	27.4984	27.5943	26.735	28.6475
Charlie25			3.24836	2.4674	5.39784	6.32577	10.1562	3.98642	8.09241	9.40646	4.63282	8.39433	4.10231	13.3305	10.5915	13.0217	8.85686	8.71766			6.64403	10.4342	11.8028	10.9573	12.0292	11.0477
Charlie26a			1.45777	0.797452	1.66446	2.15527	3.87749	1.42475	3.52598	3.78924	2.20014	3.84362	1.9694	7.68634	6.94815	7.92609	6.15883	5.87672			5.23221	7.0039	8.81376	9.50625	8.21743	8.50962
Charlie29a			4.37836	4.57116	7.60675	8.65974	11.318	4.35362	9.96747	11.7022	5.61656	10.0675	5.37725	23.6112	24.125	25.7221	22.1112	20.3783			14.3859	17.5913	18.4763	22.0894	20.5551	19.7547
Charlie29b			3.19135	3.53534	6.88528	7.91633	12.771	3.91148	9.44713	11.0227	4.80778	10.1626	6.41314	32.3923	31.9577	29.1875	26.7663	22.8131			24.1511	35.9167	42.0478	41.0732	45.612	52.6405
Charlie2a			27.5139	15.928	30.1311	28.4084	38.6719	19.1252	26.1059	33.4812	18.5995	29.7502	20.4392	65.2371	61.4524	65.9392	63.3877	47.4736			42.5126	56.2572	65.2903	60.5322	55.304	56.5776
Charlie2b			17.8924	11.4862	21.8247	23.8457	39.1141	22.0876	33.9668	45.4393	23.8991	42.0281	29.8236	77.958	82.7758	82.6785	68.2473	59.5413			59.1313	101.022	113.404	107.046	99.5418	101.774
Charlie3			2.0964	2.82352	3.81115	4.7021	9.23543	3.53203	5.63522	7.76895	3.33078	6.441	3.38637	8.78783	5.92327	8.42735	7.25872	6.98616			6.6937	8.52167	6.79626	8.13472	7.60804	7.46047
Charlie30a			1.78891	1.65026	2.97114	3.36608	8.63428	3.06105	7.1301	8.68513	4.12049	8.15429	4.357	10.5121	10.4915	11.2042	9.23074	11.2926			12.9638	18.218	14.6154	19.4283	17.9159	19.8212
Charlie30b			3.13664	2.76504	5.28335	4.98817	8.90303	2.75853	5.74076	6.47905	2.07975	5.53816	4.01705	32.0081	26.6554	25.4121	22.0903	20.971			16.8675	16.4315	17.0845	18.5323	16.9655	17.8124
Charlie31a			2.23008	2.37975	3.74893	4.41727	6.49276	3.53452	6.95869	7.94377	3.32657	7.14528	4.55765	6.67571	5.19573	8.43575	6.73173	6.59066			7.79804	10.1868	10.7602	10.9452	10.0727	10.4734
Charlie32a			0.676337	0.441423	0.668896	0.969524	1.75952	0.521703	1.85499	1.97257	1.12045	1.76938	0.839648	3.81959	3.12333	3.70758	2.59817	2.83761			2.10342	2.89976	2.4735	3.32014	3.12569	3.22531
Charlie4			3.47891	3.78885	4.32978	6.3135	9.7927	3.58599	7.15448	10.2648	4.96794	9.33261	5.38424	19.5523	23.6577	21.1972	19.6258	19.8284			20.8982	29.4527	24.4217	27.328	32.6005	31.8057
Charlie4a			13.913	10.404	23.5567	24.4181	43.5491	13.7136	28.769	35.9048	17.4433	32.3666	20.5583	73.7599	83.3641	81.1452	67.9945	66.5426			63.3638	84.1006	91.5499	92.3611	92.1339	98.4208
Charlie4z			39.8005	35.1967	48.1033	59.2804	85.601	30.8181	71.6691	75.4744	39.0092	75.9009	49.4058	222.305	190.363	224.145	195.269	181.6			147.881	177.207	180.627	211.927	201.205	201.046
Charlie5			30.6637	13.7952	41.653	36.2076	44.2042	56.6092	71.9728	116.985	76.194	122.09	114.24	58.1238	81.8301	69.119	58.5773	53.8707			47.5241	65.4746	75.9125	61.4083	66.4145	65.9453
Charlie6			1.19602	0.947285	1.7578	1.7526	3.41287	0.725364	1.3181	1.9354	0.941171	2.20212	1.29443	4.45891	4.54107	5.1688	3.77722	3.48289			2.95222	2.76511	3.03748	3.80586	3.70631	4.02192
Charlie7			10.4638	8.83997	18.2469	22.4638	37.3751	16.9781	33.618	38.1533	17.6304	33.9697	22.249	72.6056	76.1792	93.4563	80.5351	70.8239			64.6995	91.7471	96.6906	93.2838	92.7022	96.5776
Charlie7a			2.74537	2.20516	4.37116	4.78449	8.08395	2.63225	7.18664	7.75367	3.75396	7.63031	4.71352	24.9306	35.1087	30.5762	28.4078	25.2948			26.1841	38.7259	38.2899	36.2163	36.8523	39.98
Charlie7b_Mars			0	0	0	0	0	0	0	0.435687	0	0	0	0	0.879794	0.989759	0.576395	0.497147			0.423937	0.845668	1.12859	1.12794	0.997756	1.14541
Charlie8			25.6069	26.6153	38.9901	44.7726	78.5805	27.3039	54.4225	70.2832	31.4212	58.8506	41.5488	119.754	130.803	137.41	120.544	123.284			117.919	146.818	137.499	144.491	141.514	141.033
Charlie9			5.254	4.05202	8.52423	8.53123	14.8206	7.09742	8.69312	12.9626	6.01275	10.3319	7.83785	25.9467	24.4263	27.731	24.5087	25.2455			20.9906	25.2775	29.0059	28.7122	28.368	29.2008
Cheshire			38.6087	14.3006	40.8649	41.0617	36.5942	23.2576	34.0012	37.9068	26.2624	46.5068	30.2575	51.0913	52.1369	64.6977	63.903	49.6449			43.0667	61.889	87.1193	81.1069	77.4874	81.6086
Chompy-6_Croc			0	0	0	0	0	0	0	0	0	0	0	0	0	0	0	0			0	0	0	0	0	0
Chompy-7_Croc			0	0	0	0	0	0	0	0	0	0	0	0	0	0	0	0			0	0	0	0	0	0
CR1-1_Amn			0	0	0	0	0	0	0	0	0	0	0	1.00995	0	0.613813	0	0.479394			0.429617	0.412623	0.440886	0.618792	0.528387	0.532467
CR1-11_Crp			0	0	0	0	0	0	0	0	0	0	0	0	0	0	0	0			0	0	0	0	0	0
CR1-12_AMi			1.99157	1.72477	3.34448	2.54815	1.92105	1.85957	2.69252	2.74364	1.73669	2.39807	1.54434	2.91756	3.71693	4.54786	3.51649	3.99332			3.93866	5.74186	5.30358	4.92358	4.87461	4.73802
CR1-13_AMi			0	0	0	0.442802	1.08637	0	0	0.404037	0	0	0	1.19141	1.40843	0.675339	0.923731	0.643145			0.686173	1.1051	0.886203	0.93699	0.972592	0.637542
CR1-16_AMi			0.521308	0	1.19779	1.59296	1.87422	0.742823	1.51249	2.24737	1.11546	2.0564	1.00559	4.21351	3.42867	5.06658	3.77126	3.20519			2.23352	3.38057	2.5968	2.97342	3.72319	3.41094
CR1-3_Croc			2.70284	2.80019	5.25784	6.17074	11.8678	3.6072	12.2575	13.7331	6.44346	12.1363	6.59696	16.2831	13.993	19.0861	14.7041	16.0625			11.9719	18.454	19.7467	27.2062	27.4054	25.9144
CR1-8_Crp			0	0	0	0	0	0	0	0	0	0.464636	0	0	0	0.409358	0	0			0	0	0	0	0	0
CR1-L3A_Croc			1.57738	1.90904	2.53558	2.68232	2.39674	1.77938	2.07081	2.50672	1.4962	3.10412	1.79551	7.0908	5.7933	8.12781	8.06196	8.16199			5.76645	5.28001	5.12052	7.93109	8.22588	7.89817
CR1-L3B_Croc			0	0	0	0	0	0	0	0	0	0	0	0.771734	0.488658	0.836764	1.1223	0.652311			0.517134	0	0.549348	0.851204	0.679059	0.661906
CR1_Mam			7.98831	6.0797	13.9221	16.7344	24.3844	7.73238	16.2725	21.3128	9.55803	20.1473	9.91672	51.6088	36.3833	47.9657	36.498	36.549			31.2058	47.5144	52.4292	55.4195	55.7717	55.7766
CRP1			0	0	0	0	0	0	0	0	0	0	0	0	0	0	0	0			0	0	0	0	0	0
DNA1_Mam			0	0	0.544451	0.547112	1.6805	0	0.569454	0.719064	0	0.834994	0	3.43504	3.03662	3.31826	2.6471	2.49207			2.11775	2.32718	2.23539	2.8656	2.67788	2.77748
ERV24_Prim-int			1.31955	1.61169	1.60224	2.96916	9.11375	1.78533	1.63241	3.91772	2.87251	4.83271	2.43779	8.38338	11.4348	14.594	13.8706	10.1351			6.48184	5.18914	5.63455	6.40232	6.25174	7.53713
ERV24B_Prim-int			1.99521	1.51286	2.69114	3.35492	7.7034	2.17067	2.54511	4.69248	2.36676	4.15404	2.99789	5.50286	5.61914	8.15558	6.10584	6.96097			6.11171	5.89313	6.30423	8.4199	6.54389	8.01009
ERV3-16A3_I-int			22.8698	34.7108	38.8327	60.4211	143.704	34.668	64.7333	70.1789	44.8116	68.6731	50.8043	63.6477	63.9739	93.3027	74.5783	82.4668			74.4483	94.6308	89.1797	97.9848	92.5088	97.3841
ERV3-16A3_LTR			2.26235	2.80402	3.90449	4.82872	11.1282	3.45654	5.46997	7.02831	4.62279	7.69274	4.55915	7.4252	6.2999	7.76296	6.58841	7.31201			6.17249	8.50775	9.15666	8.56588	7.95019	8.68036
ERVL-B4-int			58.3917	73.194	69.3689	106.548	111.954	43.9859	97.1857	80.1413	53.5175	84.0792	66.1331	123.847	115.891	156.897	120.58	120.908			108.188	125.13	129.812	143.895	136.724	133.565
ERVL-E-int			45.3318	54.2925	71.3551	91.0164	176.868	49.2898	104.229	118.73	59.6376	117.742	81.125	144.084	143	193.217	163.666	170.333			154.782	188.546	192.434	235.011	200.507	210.045
ERVL-int			4.15698	7.16337	10.0188	11.9949	14.7623	5.62934	14.8949	12.9341	13.7407	18.114	8.8331	25.0147	15.9096	29.6524	25.6476	23.8048			23.0151	30.7839	33.1522	34.5884	27.6217	32.492
ERVL47-int			0.948171	0.970604	1.64891	1.86781	4.81925	0.619014	1.12312	2.5146	0.940576	1.95216	1.31319	8.22408	9.08495	10.6864	8.53049	8.84163			5.52067	7.69718	7.70357	11.0432	8.93439	9.6842
Eulor1			0	0	0	0	0.424693	0	0	0	0	0	0	0.755715	0.795769	0.552547	0.471105	0.523319			0	0	0	0	0	0
Eulor10			0	0	0	0	0.634078	0	0	0	0.650218	0.504104	0	0	0	0	0.418862	0			0	0	0	0	0	0
Eulor11			0	0	0	0	0	0	0	0	0	0	0	0	0	0	0	0			0	0	0	0	0	0
Eulor12			0	0	0	0	0	0	0	0	0	0	0	0.529752	0.407035	0.709385	0.506576	0			0	0	0	0.579548	0	0
Eulor2A			0	0	0	0	0	0	0	0	0	0	0	0	0	0	0	0			0	0	0	0	0	0
Eulor2B			0	0	0	0	0.786914	0	0	0.409297	0	0	0	1.54102	1.41462	0.959764	0.753989	1.07705			1.54504	1.26775	1.0952	1.14297	1.03298	1.16507
Eulor2C			0	0	0	0	0	0	0	0	0	0	0	0.419925	0	0	0	0			0	0	0	0	0	0
Eulor3			0	0	0	0	0	0	0	0	0	0	0	0	0	0	0	0			0	0	0	0	0	0
Eulor5A			0	0	0.482228	0.768827	1.12666	0.660939	0.893765	1.08126	0	1.03959	0.679349	1.9445	0.942566	1.92417	1.40412	1.53196			1.24544	1.99678	2.71387	2.54481	2.00231	2.15837
Eulor5B			0	0	0	0	0	0	0	0	0	0	0	0	0	0	0	0			0	0	0	0	0	0
Eulor6A			0	0	0	0	0	0	0	0	0	0	0	0	0	0	0	0			0	0	0	0	0	0
Eulor6B			0	0	0	0	0	0	0	0	0	0	0	0	0	0	0	0			0	0	0	0	0.460283	0
Eulor6C			0	0	0	0	0	0	0	0	0	0	0	0	0	0	0	0			0	0	0	0	0	0
Eulor6D			0	0	0	0	0.481188	0	0.690475	0.462851	0	0.459245	0	0.556735	0	0.878656	0	0.553017			0.485556	1.32192	0.822985	1.02464	1.3212	0.906373
Eulor6E			0	0	0	0	0	0	0	0	0	0	0	0.551983	0.414384	0	0.498617	0			0	0	0	0	0	0
Eulor7			0	0	0	0	0	0	0	0	0	0	0	0	0	0	0	0			0	0	0	0	0	0
Eulor8			0	0	0	0.437823	0.909201	0	0	0	0	0	0	0	0.429378	0.54967	0.542723	0.466586			0.849641	0.640234	0.56167	0.750404	0.782998	0.701325
Eulor9A			0	0	0	0	0.511021	0	0.63296	0.740526	0	0.687579	0	0.947496	0.481034	1.04139	0.825906	0.659778			0	0.465866	0.471591	0.484907	0.646909	0.510539
Eulor9B			0	0	0	0	0	0	0	0	0	0	0	0	0	0	0	0			0	0	0	0	0	0
Eulor9C			0	0	0	0	1.55937	0	0	0	0.437979	0	0	1.16084	0.46689	0.826368	0.632285	0.843888			0.670808	0	0.713221	0.417104	0.545694	0.541006
EuthAT-2			4.54532	4.15135	6.05056	7.28154	8.78673	3.8547	6.69114	9.62157	3.12244	7.9817	5.13473	18.392	23.414	20.767	18.8669	16.3075			12.8355	17.9613	17.8872	15.4381	17.8946	17.8069
EuthAT-N1			0	0	0	0	0.501906	0	0	0	0	0	0	0.831057	0.543545	0.812578	0.484299	0.930459			0.52265	0.43028	0.558239	0.744775	0.565125	0.80687
EuthAT-N1a			0.822885	0.948283	1.01112	0.596755	0.401579	0.486536	1.00897	0.693083	0.851819	0.726325	0.834254	2.30609	1.9273	2.80901	2.99803	2.59298			1.90734	1.70149	1.81935	2.57011	2.20658	2.02463
Eutr10			3.14419	4.45285	5.21117	6.57361	11.601	3.6889	7.32044	7.54406	4.94994	8.11991	5.05037	11.2025	9.69968	14.8955	12.0608	11.2148			9.02105	10.3174	9.62693	11.0975	11.0346	10.8278
Eutr11			4.35715	4.34998	6.79785	7.00079	8.34822	5.22965	5.6605	8.24898	3.24622	5.90587	4.88965	16.1809	19.6315	18.6715	16.0281	14.2935			14.9419	18.2335	17.7026	16.9298	16.2826	16.9282
Eutr15			0.815006	0.87323	1.54002	1.58746	2.62417	0.843654	1.66693	1.90242	0.604694	1.74532	0.858322	2.60197	3.54438	4.05064	3.00492	3.31275			3.32865	4.25185	4.64578	3.66261	4.55724	4.66696
Eutr16			0.978304	0.957624	1.66446	2.78979	3.29529	0.98726	2.97843	3.47634	1.46715	2.99603	1.90591	3.91676	3.24293	5.25209	4.3901	3.24748			2.74906	3.93833	4.58465	5.65386	5.0666	4.95533
Eutr18			2.53315	3.30544	4.07031	5.04524	11.8985	2.99615	6.35218	7.55044	4.51833	7.6384	5.36496	15.3333	13.5887	14.2061	11.6952	14.747			13.5048	15	12.4432	18.5157	13.3182	15.2336
Eutr2			0.416327	0.576184	0.865832	0.81985	1.80919	0.455592	0.594762	1.0606	0	0.89721	0.535693	2.3602	2.74718	2.73657	3.47428	2.68843			1.54488	1.64361	1.44168	1.4673	1.56858	1.60982
Eutr2B			0.488843	0.699082	1.62277	1.63037	3.36758	1.04446	2.25921	2.76498	1.23749	2.37934	1.7763	8.03967	8.2345	7.80921	7.13498	6.99542			6.569	8.23152	7.30264	9.89328	8.59806	8.82471
Eutr5			0.96457	1.65058	1.07335	1.62199	5.2136	1.31366	2.46417	2.40144	1.89751	2.39796	1.49797	3.92854	5.33264	4.68564	4.28774	4.1711			4.00133	4.25373	2.90645	4.17838	4.27268	4.19642
EUTREP15			0	0	0.637785	1.14645	1.59866	0.548263	0.614113	0.479918	0.404592	0.627532	0.400089	0.48644	0.566799	0.67267	0.620678	0.569071			0.672028	0.739815	0.497197	0.870885	0.694208	0.877406
EUTREP16			0.993709	0.668754	1.38446	2.50485	3.25006	1.06692	2.83976	2.82358	1.04407	2.54145	1.32932	4.20195	2.55369	6.26322	5.77851	5.15067			3.91682	6.71938	14.7111	13.6765	10.8364	9.12615
EUTREP4			0.666408	0.748441	0.886677	1.49043	1.85681	1.07789	1.69069	1.65522	0.935234	1.59613	1.14937	2.61982	3.22212	3.76788	3.61478	3.22134			2.88948	3.84446	3.89577	3.76269	3.15039	3.02582
EUTREP7			0.818302	0.930202	1.07335	1.83664	1.70089	0.66763	1.73339	1.57431	0.589152	1.76811	1.13103	2.34638	2.42897	2.84274	2.4777	2.34968			1.55941	2.23055	3.57939	3.17262	3.3962	3.55237
EUTREP8			6.60168	9.45863	7.04675	13.7049	4.39205	2.78745	3.52219	4.55595	1.62393	3.80107	3.0049	6.05261	8.70273	12.4426	5.19568	13.0628			7.14481	7.29792	7.32627	7.73138	8.49466	9.1289
EutTc1-N1			0	0	0.420005	0	0	0	0	0.427435	0	0.489382	0	4.1233	4.27121	2.92794	2.44833	2.21654			1.40869	1.27078	1.29348	1.31018	1.25439	1.41718
EutTc1-N2			0	0	0.700008	0.671421	0.677	0.554006	0.646183	1.06432	0	0.811124	0.455206	2.93197	3.75513	3.4903	3.09255	2.97578			2.30832	2.79005	3.05673	3.95507	3.84455	3.43371
FAM			28.2298	36.7206	44.9137	46.0491	86.2765	35.5014	56.889	78.323	31.7438	63.1448	42.6012	147.839	128.483	124.234	112.163	118.242			124.961	238.329	105.245	139.114	119.927	129.536
FLAM_A			57.3673	74.0636	94.4737	99.892	200.289	67.9995	130.565	170.498	70.8098	149.025	97.2955	362.945	360.377	370.939	360.592	364.69			473.93	489.629	412	459.231	395.32	444.273
FLAM_C			101.573	117.899	153.837	166.814	361.1	120.977	219.216	299.909	131.977	263.877	174.234	607.304	612.746	585.802	534.436	525.861			457.186	627.404	543.279	606.622	562.731	589.641
FordPrefect			2.23168	2.60622	3.59866	4.57775	9.79562	2.60162	5.24028	5.66493	2.26298	4.03621	3.38631	7.09707	7.12544	7.93369	6.34806	7.25304			6.6655	10.0722	8.2227	9.66928	8.61881	9.16587
FordPrefect_a			0.68421	1.03862	1.25504	1.69701	5.776	0.746027	0.880959	1.79358	0.743756	1.24827	0.984804	1.69629	2.78994	2.51347	1.67781	2.44789			2.02063	1.97635	1.75899	2.02554	1.69963	1.75477
FRAM			79.8951	116.095	142.067	149.145	333.304	109.466	206.749	295.717	117.071	246.101	182.392	445.465	443.695	453.433	411.862	424.107			366.408	479.175	431.591	507.012	484.363	496.724
HAL1			134.649	144.55	247.3	260.526	519.121	168.854	345.131	435.558	228.735	397.522	231.536	665.752	582.895	706.462	583.389	537.989			462.586	638.499	677.857	756.086	733.557	744.109
HAL1b			15.0138	13.8713	27.5402	26.0283	54.5003	16.2792	31.4601	38.9246	19.2489	35.2349	19.5255	74.6526	91.3123	107.622	89.4436	75.1159			62.9601	86.7212	112.606	108.543	120.217	120.359
HAL1M8			21.822	14.0777	30.8318	32.7938	53.3136	21.9157	43.3673	45.9839	25.8069	43.7165	29.372	63.4605	51.2646	64.2531	58.8667	49.8546			41.3847	58.3647	63.4045	71.1385	69.5167	68.5171
HAL1ME			27.5589	22.7399	47.7679	47.6035	90.7179	28.7851	57.6335	70.988	34.5734	63.0706	35.3145	124.349	125.091	136.153	111.305	100.106			89.8131	144.059	146.492	149.562	154.149	162.607
Harlequin-int			26.4999	33.0847	42.6299	41.2347	128.887	37.8606	65.1687	62.7323	31.2062	48.235	40.7247	60.7339	80.2024	81.8373	72.5956	82.5488			89.1	135.098	80.1398	89.766	98.1296	101.929
hAT-1_Mam			6.58633	5.63109	10.6246	11.2602	19.0443	6.33434	14.4707	18.519	6.68029	16.3261	8.55702	52.1143	67.3177	102.099	123.679	93.3842			76.2354	199.705	283.877	216.29	225.779	193.761
hAT-16_Crp			0	0	0	0	0	0	0.400949	0.588927	0	0.601806	0	0	0	0	0	0			0	0.739064	0.860355	0.970888	0.8458	0.673368
hAT-4b_Ther			0.565519	0.639664	1.26001	1.2134	1.81519	0.590016	1.42337	1.50588	0.559808	1.30864	0.684951	2.46828	2.80877	3.10722	2.82126	2.7216			1.68273	2.76634	2.11584	2.01246	2.34821	2.28943
hAT-5_Mam			3.03611	1.44236	6.20674	5.14582	9.29648	2.96455	5.92402	8.48734	4.43071	7.96819	3.89603	66.452	70.886	58.6535	51.0857	40.5618			40.7286	42.1645	60.1979	44.1162	47.1051	46.9558
hAT-N1_Mam			0	0	0	0.879403	1.16725	0	0.494882	1.19945	0.614703	1.04833	0.692149	2.16591	1.32964	2.09473	1.29479	1.52372			1.27762	1.72024	1.80946	1.80853	1.64602	1.63014
hAT-N1a_Mam			0.523276	0.596266	1.54002	1.73043	3.38991	0.9322	2.36991	2.98279	1.04095	2.58811	1.19266	6.04017	5.69431	6.57724	5.30946	4.96399			5.34406	5.28438	5.9855	6.85706	5.87179	7.30746
HERV-Fc1-int			8.38103	15.4308	10.5829	10.711	8.69246	7.77243	21.0463	12.5381	10.5921	12.1262	7.3062	15.3642	13.7592	17.9687	16.3532	13.2593			14.13	15.0466	10.5922	15.5315	14.8716	12.1795
HERV-Fc1_LTR1			0	0	0	0	0	0	0.554737	0	0	0	0	0	0	0	0	0			0	0	0	0	0	0
HERV-Fc1_LTR2			0	0	0	0	0	0	0	0	0	0	0	0	0	0	0	0			0	0	0	0	0	0
HERV-Fc1_LTR3			0	0	0	0	0	0	0	0	0	0	0	0	0	0	0	0			0	0	0	0	0	0
HERV-Fc2-int			0.499413	0.497338	0.591118	0.493331	0.434813	0	0.920173	0.620444	0	0.600798	0	0.696419	0.809545	0.883924	0.643033	0.563023			0.576177	0.528304	0	0.783101	0.551559	0.527686
HERV-Fc2_LTR			0	0	0	0	0	0	0	0	0	0	0	0	0	0	0	0			0	0	0	0	0	0
HERV1_I-int			1.26935	1.74291	2.33336	2.1714	4.61449	1.89938	4.0037	3.68266	1.53148	2.91602	1.75664	4.86936	9.32003	9.0312	8.4249	3.69312			4.08394	7.55076	4.17013	3.99529	5.60241	5.01708
HERV1_LTRa			0.575195	1.27774	0.855565	0.795477	1.09386	0.495442	0.540567	0.866333	0.447194	0.724892	0	2.0576	1.91501	1.93671	1.72893	1.11644			0.982835	1.67933	1.43914	1.5559	1.94934	2.0356
HERV1_LTRb			0	0	0.466672	0	0.561488	0	0	0.46029	0	0	0	0.639388	0.668859	0.496413	0.414812	0.467048			0.543216	0.697387	0.875185	1.11112	0.939202	1.31862
HERV1_LTRc			0.46855	0.860789	0.980011	0.750325	1.54641	0.836179	1.0569	1.55778	0	1.57173	0.766208	0.748215	1.23498	1.00741	1.0399	1.08815			1.60149	3.20663	2.593	2.19167	3.16558	3.18849
HERV1_LTRd			0.431784	0.507974	0.637785	0	1.06051	0.469326	0.592886	0.498818	0.585554	0.575946	0.460488	0	0	0	0	0			0	0	0	0	0	0
HERV1_LTRe			0	0	0	0	0	0	0	0	0	0	0	0	0	0	0	0			0.412869	0.982878	0.464958	1.05162	0.659477	0.87399
HERV15-int			1.209	1.27826	2.79381	2.73083	8.4469	1.86548	5.48552	4.91178	2.82902	5.37612	2.68984	2.53298	3.6288	3.65569	3.97943	3.49692			5.34085	6.44746	6.32204	5.57317	5.4189	5.39486
HERV16-int			10.3282	16.734	14.2024	20.1884	35.5376	10.3138	21.3775	24.8597	12.5517	24.3125	15.1745	34.7898	35.9057	41.6236	36.1593	31.5233			29.6993	34.1724	31.4236	39.8584	35.8238	38.6678
HERV17-int			8.6837	9.39652	11.9602	17.8612	57.827	8.79781	16.5745	23.9507	12.3967	21.8599	12.3714	34.4034	30.314	34.0131	24.2879	27.589			27.2691	29.4109	22.8211	29.6938	26.4957	26.1594
HERV3-int			7.48689	9.72486	13.0354	14.1628	35.3608	6.91566	17.8787	17.1619	12.4574	20.4716	12.4757	29.2663	26.9224	24.6878	20.4885	18.058			18.8717	22.7932	18.8794	19.3777	20.3962	20.7407
HERV30-int			0	0.633398	1.07335	1.26588	5.77789	0.799209	1.03806	2.02241	1.21246	2.05684	0.973133	1.03303	0.982874	1.95859	1.61867	1.20559			0.737543	1.40413	1.03492	1.05818	1.2601	1.23931
HERV35I-int			2.37657	3.26263	3.56226	5.00038	9.45393	2.2676	3.43917	4.96852	2.09963	4.24796	2.96787	10.8481	12.4504	13.1722	10.8535	8.09114			6.7275	7.56357	6.08192	8.27016	8.93134	10.0083
HERV4_I-int			6.86113	10.095	11.9011	13.83	27.7669	9.67719	20.1523	21.805	10.1577	19.536	14.2007	25.7621	27.5669	25.6303	21.3852	22.927			17.4712	21.2012	20.7617	20.5468	22.0891	19.9283
HERV9-int			4.36429	6.94071	6.68585	11.7995	23.6311	4.38643	11.8497	14.3177	8.07231	12.4741	6.99264	13.8003	10.574	16.4667	12.7232	10.014			11.1246	13.3422	10.3328	15.2055	12.8347	14.5302
HERV9N-int			5.08941	7.39267	5.80726	9.42557	15.1195	4.53889	11.4803	10.1987	6.08037	9.56803	6.96947	11.9524	11.1738	14.9085	11.2406	11.6486			10.2503	14.9015	11.8743	11.9318	10.0844	11.612
HERV9NC-int			3.77968	4.52168	5.07303	10.9934	27.2199	5.10338	9.29796	10.6023	6.51122	11.488	8.51999	13.4494	7.47774	13.447	8.9097	10.1939			8.24939	8.99076	7.56703	11.7531	11.541	12.9487
HERVE-int			20.8644	24.4658	33.634	45.2013	57.529	29.2725	45.014	43.8134	28.1951	39.1692	31.2334	51.4605	71.6778	93.9729	102.766	101.875			74.495	90.7431	86.6252	86.98	88.7241	102.77
HERVE_a-int			12.0199	9.56434	15.0178	18.3175	30.6189	15.6151	21.3693	18.9233	10.4933	19.2737	14.8532	21.0518	26.3016	23.084	18.4323	18.0265			29.2564	37.6464	25.6862	28.8577	27.0986	26.2349
HERVFH19-int			0	0	1.69557	1.55708	4.69429	0.991216	3.22289	2.84363	0.7516	2.10321	0.967316	1.42971	0.994958	2.22491	1.49766	1.96073			1.56336	2.13287	1.63634	1.56937	2.20951	2.34872
HERVFH21-int			3.79913	5.42549	6.45563	6.71909	20.5287	3.6721	8.45722	9.70974	5.18464	6.83308	5.63731	13.3834	15.5432	12.7498	11.4601	11.4512			15.4132	16.7826	10.2116	13.6328	13.5509	16.9912
HERVH-int			108.237	224.886	269.545	213.643	444.788	112.531	274.29	399.017	212.212	272.837	164.528	169.945	193.513	306.381	228.412	220.542			225.504	285.624	195.791	271.429	274.184	309.467
HERVH48-int			6.06674	14.3638	20.9069	15.9711	34.9394	11.6056	25.9843	39.15	15.1339	25.0958	14.9572	38.2249	33.8167	35.3742	30.2579	30.4244			27.1262	43.9709	28.5491	40.5193	38.5589	42.5308
HERVI-int			1.54201	2.53936	3.07475	3.31257	8.03808	2.82288	6.19058	6.9082	7.82585	8.80773	4.78295	8.78871	5.05326	6.33991	4.91323	4.4027			4.86564	10.7737	8.78681	11.6324	10.5506	12.6174
HERVIP10B3-int			9.00337	10.7793	14.5175	17.3983	32.5411	6.50349	15.9062	18.3082	9.75959	18.0869	10.7316	49.9176	40.2441	42.083	37.2943	34.7665			30.4427	27.0251	22.8322	34.9768	31.533	31.0051
HERVIP10F-int			8.67129	8.67902	11.6282	13.9085	21.6922	7.08582	14.8752	16.5214	12.4209	18.8279	12.9824	28.2716	25.5554	37.2968	32.5676	21.6374			21.2418	31.4575	25.3843	36.4977	33.623	34.8238
HERVIP10FH-int			5.09363	5.47505	8.87672	11.5492	36.0213	8.12734	14.5919	23.4952	10.2999	22.5775	12.6018	13.113	12.0163	16.3604	13.0095	12.9219			13.9351	18.1988	16.5386	21.3449	20.1685	22.3837
HERVK-int			39.6593	37.9635	46.5191	53.3994	93.3758	40.5235	51.3987	77.3878	50.0165	71.8489	60.7578	84.4093	155.099	142.987	113.604	123.658			115.45	141.591	104.571	149.893	153.306	183.916
HERVK11-int			9.63912	9.23551	14.002	18.5753	44.9307	17.3011	25.543	37.2497	25.4836	32.8926	28.5297	24.4804	34.957	36.5315	29.8279	34.8193			49.2562	78.4176	58.4689	69.442	69.0393	85.6191
HERVK11D-int			1.68503	1.63679	3.17057	3.7318	2.91263	1.74951	1.94128	1.91381	1.54391	1.54908	1.49167	1.83776	3.62364	3.63229	2.21313	4.56409			3.40386	2.01932	1.28425	2.12433	2.56495	2.12019
HERVK13-int			9.65549	13.4622	11.2819	16.529	56.7967	11.4192	13.1823	25.1149	16.085	20.3799	18.9698	25.5802	20.1436	27.5271	23.8335	28.7011			33.6765	35.9552	21.5732	34.3415	24.6574	31.9516
HERVK14-int			17.2487	19.3581	22.7347	22.0863	33.465	15.8947	30.5662	28.3407	18.1177	27.2125	22.5147	36.3439	54.4915	48.9443	37.4748	41.2365			41.5418	53.756	44.3926	46.2701	54.5217	45.7538
HERVK14C-int			4.54937	3.85636	5.27433	5.17105	9.26381	3.29803	4.17041	4.89239	4.22002	6.85734	6.00301	5.29522	9.16807	10.5436	8.33516	8.51382			9.34571	8.3335	8.06716	10.1057	9.39312	10.502
HERVK22-int			4.66822	5.25247	7.99564	12.4641	22.3663	5.52495	17.4701	20.5861	9.6587	21.1126	11.1022	21.3109	21.5512	25.8412	23.5762	21.1324			20.4848	27.9782	30.1165	39.5037	42.24	35.174
HERVK3-int			22.0219	29.4996	34.1915	36.1971	45.7314	20.8323	44.5941	50.2722	29.6591	52.3006	38.4857	72.3356	81.0699	94.4454	79.2928	78.9612			68.7375	76.8327	88.054	97.1053	86.9474	85.3587
HERVK9-int			24.7756	26.9856	41.1045	51.3011	71.5494	28.6563	57.5442	65.0325	36.5173	61.1297	47.0877	107.536	112.319	123.285	96.572	101.696			84.6613	110.497	113.596	145.475	135.357	138.492
HERVKC4-int			0	0	0.595784	0.726504	2.67673	0	0.613477	1.33512	0.780071	2.58344	2.33944	0.46177	0	0.437938	0	0.512602			0	0.507219	0	1.06433	2.57633	1.91692
HERVL-int			29.4836	37.7144	44.1111	67.78	112.466	32.067	65.6376	67.8874	39.4033	71.7229	47.2668	85.1637	60.1337	91.6796	68.9843	73.2416			63.6541	80.7551	70.8029	85.4035	87.3819	81.9664
HERVL18-int			4.75714	5.05694	7.28008	7.89775	12.0661	7.59737	9.78528	9.92277	5.33243	10.6952	9.42786	3.83082	2.51599	6.32843	5.10097	5.79774			4.64942	5.72408	4.37533	7.15115	4.77124	4.53098
HERVL32-int			0	0	0.544451	1.04599	1.79707	0	0.792655	0.902012	0.566708	1.05918	0.493246	0.942463	0.802204	1.10882	0.777307	1.31803			0.922864	2.61437	1.35563	2.29539	2.17301	2.03916
HERVL40-int			14.6494	14.8271	16.8157	23.61	29.8359	12.8138	24.2106	25.0723	18.1014	28.3032	20.9798	34.615	31.5649	41.7432	36.4999	32.4966			26.8883	36.3685	37.5849	44.6514	39.9291	37.5462
HERVL66-int			3.74353	3.20173	3.60893	4.72533	6.40287	2.43265	2.75859	5.18252	2.07458	4.90193	3.24359	6.967	8.22155	7.30519	6.34344	6.70189			6.53225	7.42709	5.59403	6.85552	5.86805	6.09812
HERVL74-int			9.17942	8.25711	8.44676	9.53412	10.1873	4.83347	7.58086	9.4382	5.69434	9.77742	7.18779	31.3327	55.2388	115.184	123.777	79.1754			42.8404	62.2919	108.436	136.71	133.313	109.231
HERVP71A-int			2.92053	2.89384	3.56226	4.75475	13.8633	3.33577	8.06697	8.48036	4.9687	8.59011	5.20534	11.3759	9.12215	14.9938	12.9151	12.1069			10.3639	14.0552	10.674	14.7176	14.9231	14.2746
HERVS71-int			14.3729	16.2896	19.5644	22.4623	40.282	14.8187	32.4689	35.533	18.8366	30.0431	21.9238	16.3197	16.091	23.9078	20.861	19.5869			18.5709	23.5156	18.166	18.9951	18.8306	22.4468
HSMAR1			13.1799	11.1007	15.7984	16.957	31.0987	17.6634	23.8284	24.948	16.0127	21.9543	14.8037	36.955	35.7982	35.33	28.2893	26.7297			32.1651	41.5934	36.9585	41.5298	36.0946	37.5781
HSMAR2			18.3971	17.2079	30.754	38.7734	55.5829	21.5885	45.5066	48.5237	29	48.4707	32.2107	81.1447	73.3381	80.9694	68.0999	56.8956			52.9412	63.8161	75.8158	88.5988	80.6293	80.9293
HUERS-P1-int			7.00446	8.13148	10.6541	14.0523	20.2289	6.42935	25.1375	13.3089	7.39879	14.38	9.23071	28.0221	24.5238	32.3982	24.8643	21.8806			18.4187	18.0514	17.9175	21.6464	17.6873	16.3225
HUERS-P2-int			1.48586	1.75801	1.66446	3.25257	6.54561	1.175	2.0823	1.79831	2.01928	1.92061	1.64664	2.60882	3.22005	4.69089	3.51609	3.49413			2.00527	2.1148	1.35144	1.55626	2.14997	2.14004
HUERS-P3-int			12.6192	14.1021	17.0646	22.2229	34.2805	12.7827	22.4811	23.1911	16.3361	30.4124	21.9502	32.0036	22.6293	43.1903	33.725	29.3646			22.6561	35.4196	29.1336	42.4011	38.0168	37.2364
HUERS-P3b-int			9.33463	7.18078	14.1398	16.9756	31.4488	10.2756	21.3194	21.8595	12.9299	20.8771	11.5693	38.8479	36.0469	45.0455	39.6759	35.2625			32.2094	41.5081	35.9624	47.4478	44.4788	42.2494
Kanga1			1.79747	1.25721	2.83114	3.09567	6.62485	1.87376	4.6905	5.74099	1.66982	5.00781	2.76696	15.0004	13.0832	16.874	13.19	11.1767			8.70738	11.5306	13.9724	15.6188	15.8142	14.8091
Kanga11a			13.6402	4.88073	10.4426	15.83	18.2162	25.3897	55.3184	34.8337	18.9261	30.1901	21.4257	11.2088	13.8811	26.4284	29.7338	24.1323			34.5552	65.0203	56.9444	71.8451	73.5228	52.4783
Kanga1a			3.13156	2.71194	5.80229	6.34755	9.66709	3.45288	5.3886	6.68095	3.36089	6.52074	3.80713	14.8329	15.2532	15.7938	12.7461	11.8121			10.3511	16.6409	16.1863	17.004	16.8837	17.3988
Kanga1b			0.706749	0.55108	1.54002	2.01358	4.4583	1.11302	2.05321	2.95552	1.09117	2.6167	1.6596	7.21874	5.41973	6.48086	5.76801	5.44785			3.5261	5.66645	5.18285	5.9509	6.29135	7.14145
Kanga1c			4.37831	3.14376	5.28895	6.73149	8.60102	3.61547	6.15634	7.47035	4.02829	7.6684	5.36677	17.6849	18.549	21.0814	18.081	17.3884			13.5513	15.5869	17.2505	20.4477	21.5732	23.6358
Kanga1d			1.6987	1.28984	2.32558	2.7601	4.4214	2.02461	2.86203	4.11501	2.12896	3.45234	2.51118	6.70301	7.47781	8.59621	6.19635	6.31384			4.77407	7.7703	10.6408	9.54207	10.1657	9.95639
Kanga2_a			5.03805	3.87347	8.83565	9.54412	18.8247	6.83087	14.0131	15.7426	8.34334	16.3532	10.5226	40.5457	33.355	41.1395	37.7521	31.4632			25.9128	36.2642	40.1898	40.9304	40.7994	41.0714
L1HS			28.3454	32.021	26.1781	25.8794	57.6811	46.7723	35.7152	39.6694	48.1499	67.8831	42.5989	34.4772	27.6393	41.4078	30.8179	34.2111			34.4172	44.9284	26.6454	36.3668	35.6903	35.7633
L1M			1.26822	0.682051	2.10625	2.43407	3.62884	1.1301	2.7554	2.91627	1.99618	2.98068	1.9352	6.93931	6.84685	7.49452	6.76564	6.13728			5.85277	6.37166	8.05574	9.7106	9.47745	9.68939
L1M1			34.4545	36.3806	66.828	102.817	272.082	47.2424	103.129	121.644	69.2302	132.537	70.1456	195.536	148.734	211.738	166.474	153.594			133.438	207.838	198.321	226.312	213.934	221.536
L1M2			86.7686	75.536	96.7737	116.387	224.491	67.7695	130.893	126.73	78.7086	128.3	79.318	193.022	158.947	221.458	190.909	159.837			136.96	217.94	266.999	280.324	271.077	248.588
L1M2a			2.68136	3.09822	5.18006	7.41898	20.9619	2.23841	7.60722	8.31884	4.78239	8.23162	4.16788	12.0142	6.14471	11.198	8.48704	9.84083			5.76936	8.31511	8.1529	9.11216	9.10114	8.25502
L1M2a1			0.601056	0.528926	1.01112	1.30862	3.48795	0	0.977127	1.32317	0.985462	1.49012	0.707897	2.74584	2.64765	3.31071	2.26592	2.65708			2.85703	5.75103	11.6516	10.9567	12.7016	13.5375
L1M2b			0.497051	0.704709	1.40779	1.83859	4.8509	0.952784	3.03601	3.63016	1.50853	4.63451	1.64035	2.02144	1.78268	2.79649	2.28705	2.5973			1.92761	5.3552	5.26233	6.21915	5.2271	5.77396
L1M2c			1.53548	2.71503	3.72373	5.02574	16.6022	1.89049	6.61047	7.12877	3.81548	6.7935	3.25845	15.4711	6.24467	12.7248	9.98208	8.40637			5.32881	6.86496	6.00309	9.77771	8.52621	8.48751
L1M3			34.5834	25.0745	54.6068	61.7592	110.207	38.67	69.651	84.1607	42.7477	80.8902	49.5785	144.087	162.632	168.892	134.252	126.444			106.947	163.536	186.885	175.083	171.555	185.224
L1M3a			13.2694	14.7728	12.9268	14.7669	29.6813	10.653	14.8351	17.5477	10.9132	20.6019	15.8965	47.0915	30.3221	31.559	23.476	22.325			18.4084	19.6581	25.205	24.9002	20.2905	22.3014
L1M3b			5.11607	4.48302	5.72918	10.1432	14.4988	3.69272	6.77223	6.81527	4.12796	7.36914	5.27136	9.67967	12.2287	10.3052	10.0973	8.7822			7.14181	10.273	11.1955	9.26691	9.37073	9.04808
L1M3c			3.48038	2.30325	5.84895	6.3987	14.8126	3.03447	9.24509	9.73721	7.04183	9.45701	5.51206	13.9757	13.8138	18.2305	14.4414	14.6799			8.56959	14.1043	17.1603	17.5899	17.3829	17.9144
L1M3d			2.22011	1.8861	1.94447	3.37908	5.27057	2.03108	4.38722	4.73347	4.22901	6.26487	3.32278	5.92649	4.10192	7.19052	5.51217	5.13121			3.54778	7.19251	5.37022	5.96866	6.22198	6.03864
L1M3de			6.23746	7.34612	13.9382	11.6167	17.1887	7.01574	13.5491	13.3485	7.66502	13.4561	8.12362	17.2922	21.8041	25.1489	23.7564	20.5991			17.9589	26.4549	25.2849	29.2095	23.5258	22.6445
L1M3e			1.93095	2.01037	3.23559	5.26714	16.4639	2.02166	3.76826	4.76022	2.98404	6.03732	3.19189	8.59325	5.95781	9.35738	7.40113	7.03939			6.09025	5.8094	5.03736	7.8893	6.84303	7.05191
L1M3f			1.94342	3.04301	4.81917	5.9438	17.5857	2.42486	7.50074	8.67168	6.28292	10.4024	5.39299	16.5722	14.313	19.4596	15.5961	14.3302			11.8948	15.4309	16.5101	19.9529	17.7756	20.78
L1M4			139.022	112.831	198.614	215.966	416.488	132.764	289.633	318.563	173.092	308.812	195.571	518.066	563.631	616.629	525.098	454.45			363.462	536.429	627.926	649.728	657.055	668.023
L1M4a1			10.7546	9.46355	18.2655	21.6716	42.6129	12.0274	31.4556	34.5827	22.4505	33.3489	20.2762	59.5648	50.2972	54.3659	48.5724	42.3361			38.2594	58.6748	66.8195	76.4659	74.0145	73.9554
L1M4a2			9.57286	9.0407	12.9579	15.9858	37.6575	8.63541	18.8151	28.0604	13.7387	25.8363	13.2749	33.421	32.0548	41.9364	33.5072	30.3021			23.3332	33.3338	41.3592	46.9593	43.5234	42.9506
L1M4b			98.6103	46.984	70.1252	90.8388	115.303	55.4825	108.625	103.354	79.3563	96.5873	79.0456	99.0584	128.186	195.786	108.563	125.623			101.685	147.372	212.567	196.555	200.228	194.731
L1M4c			21.6949	17.2142	34.8358	39.7209	91.7477	22.2824	53.3286	64.6355	41.1068	65.0372	38.3031	137.139	122.525	128.44	102.065	88.2018			68.1148	108.853	131.464	149.125	129.809	140.287
L1M5			218.581	152.938	315.839	334.447	585.639	221.142	433.51	491.045	266.972	453.694	296.265	1016.57	1137.85	1145.6	1002.56	838.533			710.606	978.774	1131.14	1075.3	1092.67	1104.26
L1M6			11.4046	10.9439	24.4536	29.1453	59.9898	17.1324	32.7284	33.6464	17.4288	32.1479	18.4464	75.4796	77.0956	105.418	80.1266	73.8992			64.0493	107.669	107.495	94.9104	100.887	100.234
L1M6B			32.0132	30.5454	36.8049	29.8548	24.6373	21.5255	30.4285	21.812	20.1842	22.2504	16.2922	57.1282	58.577	66.6279	67.0725	48.0697			37.395	40.1125	43.3712	40.3868	39.7259	38.4109
L1M7			7.51032	8.27406	17.9333	19.1153	43.7219	12.5935	25.1552	30.5558	14.0218	26.8557	16.2478	47.9761	41.4482	52.7308	42.2338	38.968			40.2823	56.9417	59.7839	70.7159	68.7662	70.1307
L1M8			6.10842	5.42549	11.1189	12.1496	25.961	6.10494	15.617	19.2151	8.48698	19.1774	9.73318	29.3431	23.1188	32.379	25.6343	23.3752			19.0126	29.6391	31.8787	38.2339	34.3364	33.8019
L1MA1			49.3731	52.2956	80.8316	86.6601	144.061	36.8571	73.9714	73.2409	41.9753	70.6967	40.7223	103.536	114.489	147.556	118.957	111.283			105.311	144.772	125.734	135.913	134.705	142.59
L1MA10			12.8247	11.4226	27.2997	27.9566	47.7387	15.7521	29.2426	39.4425	21.7557	32.4817	20.1234	59.178	56.7297	66.5962	55.181	49.8587			45.3429	62.8109	65.7746	72.2598	71.3621	73.4373
L1MA2			37.6578	28.9806	61.8589	83.5352	211.547	35.6483	84.1936	97.2245	48.9427	90.9957	47.3405	165.483	134.521	175.758	135.754	125.468			107.313	169.093	149.027	165.898	166.927	164.59
L1MA3			55.3815	44.6318	98.4699	121.26	305.54	61.7777	131.732	170.969	93.7638	170.466	87.2915	254.385	214.174	278.046	213.678	191.518			178.45	289.893	278.414	293.277	272.746	288.188
L1MA4			53.1544	44.3756	98.4783	105.738	263.511	55.0428	113.052	137.006	68.8865	129.938	67.286	221.548	201.212	262.764	219.001	186.151			160.861	236.014	247.645	258.918	260.27	278.738
L1MA4A			39.7304	39.684	76.1372	88.1304	219.78	40.0352	90.0646	94.4081	58.5178	98.2945	49.9855	154.305	110.769	174.291	131.085	116.234			98.9166	129.041	128.265	145.872	141.204	147.668
L1MA5			59.7721	46.5688	82.408	85.8334	176.014	41.7665	87.4277	96.6398	60.2447	103.942	57.6478	124.565	101.903	142.775	115.716	105.116			80.6951	133.774	121.742	141.841	135.743	144.613
L1MA5A			23.9399	17.997	39.1438	42.7821	82.5092	22.5042	47.7257	48.5847	33.9525	49.6629	31.254	90.3973	64.2035	92.6776	70.653	54.8986			53.8308	69.0777	78.8621	98.0076	87.3172	94.4476
L1MA6			29.8301	22.2064	46.3368	49.5029	99.0127	22.6103	40.5693	53.2567	29.6577	50.4886	27.8068	97.5365	93.4595	115.18	94.3919	79.9891			65.9565	91.5346	88.9781	95.1745	96.1451	100.717
L1MA7			39.0409	31.5807	69.4062	74.6198	133.782	39.9909	75.5559	85.802	50.3614	79.5731	50.7626	151.237	150.83	175.377	139.155	129.955			116.199	148.277	151.589	157.079	158.681	160.251
L1MA8			59.0285	32.7534	84.8098	98.6367	180.864	75.5802	134.707	132.185	85.056	131.94	83.0031	241.273	241.892	255.069	195.582	165.34			158.524	263.261	303.031	299.847	291.083	309.886
L1MA9			85.483	62.4081	127.645	150.91	266.286	75.2748	142.481	164.999	89.032	154.562	95.7933	280.359	319.263	335.706	279.878	243.504			228.744	322.435	338.241	399.01	389.608	390.294
L1MB1			31.1241	24.5738	47.2732	57.5756	105.133	30.8818	75.4866	70.9433	43.4066	68.246	40.1784	115.285	98.2506	131.394	105.78	91.5136			88.456	122.781	124.235	129.064	122.53	119.583
L1MB2			66.8617	49.1599	105.748	120.009	222.97	64.8562	133.934	165.436	95.4348	164.938	98.5043	386.1	352.356	358.788	296.625	268.128			221.183	302.802	337.223	358.177	348.172	353.533
L1MB3			134.811	138.504	225.735	242.701	455.202	138.192	306.909	389.966	188.173	346.227	213.26	599.972	576.296	674.927	568.342	546.892			474.383	680.463	687.827	763.207	773.96	784.79
L1MB4			87.7256	69.7495	131.34	137.997	261.852	101.398	240.091	247.831	202.814	288.042	192.803	292.121	281.399	329.276	281.561	256.105			226.818	358.843	376.476	392.3	389.083	387.159
L1MB5			147.24	128.619	194.264	189.436	288.326	119.167	224.577	272.315	141.116	249.246	162.507	367.238	376.722	441.573	351.246	354.435			309.974	439.351	442.24	461.179	485.329	511.692
L1MB7			200.11	171.356	328.88	335.333	626.691	194.031	426.203	536.909	269.989	500.107	296.693	904.245	883.058	966.754	815.551	763.293			637.326	946.599	1015.57	1122.22	1120.74	1155.13
L1MB8			145.155	117.882	246.545	254.192	437.094	151.878	299.513	338.02	170.67	317.235	195.184	576.839	567.541	622.051	521.173	483.512			467.121	647.483	603.727	666.917	664.208	682.485
L1MC			35.4499	19.6801	56.6512	58.8199	101.516	36.1153	60.524	75.1722	42.9215	70.3816	47.042	124.213	122.443	133.543	110.168	98.2268			85.3636	126.571	153.786	150	155.092	151.687
L1MC1			113.446	103.933	175.072	196.167	393.815	116.256	230.631	273.342	158.994	270.914	173.761	343.132	330.059	420.185	353.857	320.278			289.45	397.059	394.606	436.362	431.487	442.507
L1MC2			47.927	38.6011	75.8441	75.4515	155.967	46.05	91.4904	116.236	56.6281	109.424	68.1393	147.233	149.134	177.776	144.622	140.01			119.69	193.753	234.364	217.873	218.366	218.421
L1MC3			88.0366	70.5542	127.31	154.225	256.893	84.1148	169.485	192.886	101.564	182.837	115.58	301.719	287.382	379.087	315.244	291.776			250.538	331.98	317.902	359.572	336.478	341.569
L1MC4			169.254	152.907	283.297	312.936	534.963	183.196	404.936	462.186	251.997	443.919	270.03	903.966	870.686	912.37	783.971	710.315			641.372	896.088	912.038	1030.74	1011.77	1045.91
L1MC4a			90.0232	78.9182	133.347	148.598	231.927	95.9061	168.836	208.762	115.121	192.888	126.266	326.637	302.921	356.602	315.21	285.21			242.656	318.94	329.464	384.519	374.156	378.957
L1MC5			87.2353	69.7582	148.026	155.881	282.318	103.688	207.861	244.024	128.616	230.785	140.872	443.436	419.08	458.51	391.673	353.502			308.691	457.895	499.897	556.574	534.537	548.25
L1MC5a			139.018	103.726	213.164	219.464	374.725	143.691	300.078	324.083	181.98	315.895	197.727	661.952	589.408	642.235	550.382	482.723			453.819	602.708	649.482	707.251	679.748	675.975
L1MCa			44.6427	33.9112	66.5119	77.3074	183.51	40.7337	76.9427	92.433	69.9007	103.889	63.1844	150.059	147.608	200.928	168.605	144.377			126.412	190.159	184.365	196.951	196.518	202.221
L1MCb			6.64051	5.7328	10.1019	13.7267	30.3815	6.92529	15.8945	16.7186	10.3344	17.3017	8.76789	18.7639	14.7129	24.8012	19.0331	17.4671			17.5002	33.5615	30.2142	35.9229	29.5354	30.6945
L1MCc			11.1911	12.1058	16.7053	25.7816	48.8752	13.1444	32.3874	39.9687	22.447	38.2029	24.2306	50.4789	45.1847	58.8719	49.7274	44.2405			33.5001	50.1114	58.8098	66.5172	60.3896	57.0315
L1MD			72.644	68.5162	86.6538	98.8318	151.916	54.2439	86.551	106.162	55.2031	93.0208	60.8215	174.638	203.067	187.225	162.867	150.832			143.361	248.045	275.8	239.124	253.866	258.269
L1MD1			47.1086	51.2398	99.8	103.754	224.983	67.1344	160.432	184.793	87.545	165.231	103.253	258.102	269.848	297.605	249.73	236.186			195.658	341.61	331.812	376.793	383.062	381.49
L1MD2			91.8747	75.8287	147.251	162.391	271.823	96.1362	195.066	209.609	115.122	201.472	125.586	347.646	377.185	408.671	352.235	320.139			289.402	417	442.08	455.341	460.044	480.739
L1MD3			33.2438	26.9074	43.659	53.035	92.8333	27.9053	62.3814	73.6466	34.6272	69.133	41.4275	138.713	134.512	142.63	116.619	115.558			95.6478	132.255	117.101	141.613	138.356	148.887
L1MDa			62.45	42.9799	89.3303	95.8143	186.38	52.5286	118.538	123.356	81.8285	123.036	79.5182	189.147	176.395	210.833	177.77	152.721			129.13	191.404	210.463	235.798	222.157	230.067
L1MDb			3.722	3.06604	3.53768	5.618	10.574	2.89306	6.01295	5.64895	3.81855	5.5137	3.70008	13.1868	10.8609	11.7766	10.2457	7.22208			6.84656	12.414	11.5039	15.1791	15.525	15.43
L1ME1			265.072	203.687	408.039	419.837	764.607	284.383	535.084	652.961	333.369	594.111	369.113	898.93	968.418	1081.9	945.174	853.336			789.117	1279.16	1397.56	1324.88	1411.3	1463.72
L1ME2			113.409	75.5851	156.903	166.304	263.694	105.649	182.506	210.134	121.694	202.814	130.288	399.363	453.784	491.471	441.796	381.708			332.775	439.601	489.219	493.347	484.595	509.305
L1ME2z			36.7668	27.1139	61.6651	68.2217	131.61	42.3653	89.9414	106.894	58.3951	103.349	65.3293	216.781	206.346	227.351	188.546	170.239			139.012	197.037	224.673	233.285	229.511	244.238
L1ME3			48.5077	44.9864	83.4976	89.178	165.766	63.9373	137.653	166.33	76.539	143.771	88.6108	254.67	254.736	282.551	244.359	232.19			194.924	297.508	315.33	322.215	332.411	334.598
L1ME3A			101.562	89.8968	154.356	172.563	294.179	99.4481	187.215	231.599	119.515	210.454	131.351	413.068	436.911	433.915	364.421	346.632			306.332	400.767	437.213	431.222	439.494	453.885
L1ME3B			80.3444	57.0925	114.897	116.316	180.763	76.8116	171.983	171.161	95.5017	154.006	108.297	287.619	319.04	337.719	296.507	263.412			232.109	326.854	394.496	370.496	377.147	389.195
L1ME3C			11.8105	8.61266	20.4091	23.073	44.3532	10.1301	22.1549	32.3509	12.2107	26.3522	15.7677	85.4373	77.9006	95.2973	80.6906	74.6041			56.4593	74.5654	78.6732	85.1145	86.5134	89.3507
L1ME3Cz			61.319	42.6188	88.4695	112.544	189.179	61.3131	124.729	159.071	76.4049	140.506	87.742	321.142	317.344	345.442	274.692	246.052			218.053	319.822	361.818	368.662	370.607	393.145
L1ME3D			28.7819	23.0493	40.8073	43.6858	72.7086	25.4407	44.998	53.6217	28.3391	48.0014	28.8198	128.566	137.368	131.221	112.055	98.4075			87.9479	107.227	114.669	118.427	114.078	116.385
L1ME3E			48.3781	31.3668	58.572	64.75	96.2199	40.4556	69.4886	81.5219	42.0273	69.1199	46.3209	163.12	171.388	176.927	147.937	132.927			122.027	165.531	189.148	174.74	179.972	183.665
L1ME3F			28.3105	20.3581	46.4083	45.4198	75.7515	30.4274	72.5582	75.9028	40.0984	74.4301	46.5751	119.81	114.665	145.655	123.325	99.5495			92.0677	135.961	168.283	182.565	183.984	182.969
L1ME3G			92.9426	63.594	151.12	157.77	267.844	102.129	189.672	237.018	120.198	218.561	137.995	484.149	521.957	506.307	433.393	384.17			330.698	461.975	526.312	540.227	547.182	555.839
L1ME4a			108.533	63.3181	180.903	186.251	306.892	143.361	251.801	294.652	145.197	261.875	173.226	890.473	1075.88	990.835	887.397	720.493			649.661	801.504	1014.54	865.686	937.825	942.358
L1ME4b			153.513	112.735	239.342	237.532	416.194	145.509	292.86	362.199	173.624	330.394	209.784	751.719	783.517	790.77	699.013	624.65			542.98	743.686	789.358	804.123	821.143	838.583
L1ME4c			41.0507	28.3554	69.2613	70.9285	114.725	45.5392	97.552	109.982	54.2167	98.8323	59.0027	305.325	398.054	402.213	389.681	318.407			257.424	350.153	465.136	442.25	482.165	477.85
L1ME5			15.9766	15.3146	22.5505	27.1666	56.3913	15.0168	34.3519	40.9548	22.8712	36.9408	22.6789	97.5508	92.7009	98.0358	81.6678	79.5924			72.5935	96.3406	97.9249	116.45	108.651	111.046
L1MEa			1.61458	1.31557	2.06891	2.26738	6.73232	1.77837	3.1719	2.82461	2.99126	3.51777	1.90501	3.41462	4.37834	5.84811	5.00105	5.55223			8.08691	4.69927	8.47593	4.61983	4.11284	4.84241
L1MEb			5.33032	5.30584	9.59789	11.1308	27.8154	6.36808	13.243	16.182	8.2231	16.6586	9.325	32.794	23.9564	29.8129	24.9198	24.176			20.241	26.4825	30.0629	33.5644	32.8355	31.7641
L1MEc			101.259	97.905	170.753	187.504	417.688	118.933	232.602	282.662	153.95	270.786	166.596	415.606	388.439	470.913	412.283	370.832			314.634	489.627	529.194	534.952	505.526	530.811
L1MEd			75.4958	60.1876	127.153	145.942	279.553	83.1514	189.341	215.289	129.882	210.513	129.812	397.081	400.805	445.849	376.816	348.554			320.58	457.826	542.74	537.1	538.003	547.893
L1MEf			68.5257	48.4249	95.3849	113.796	217.174	62.3193	133.749	144.401	100.673	150.382	86.5768	313.761	309.208	368.112	306.932	256.5			200.355	273.783	340.062	324.381	320.796	333.059
L1MEg			67.929	56.082	106.59	118.394	223.269	69.4002	158.448	175.01	106.124	168.406	101.621	266.418	252.756	316.379	261.254	239.317			183.802	283.038	346.356	339.198	333.407	346.595
L1MEg1			2.45551	2.30437	4.2156	4.65777	13.9628	2.22763	5.10288	6.5987	3.30152	6.77834	3.44986	14.3698	13.3433	17.6732	15.5343	13.8873			8.6811	8.82076	9.01466	11.6303	11.011	11.4135
L1MEg2			8.41353	6.72971	6.82865	11.7415	11.6673	6.60605	13.6308	11.3984	6.18625	9.57903	8.22768	24.5053	29.0234	28.5847	27.2737	27.6491			23.2683	31.6684	26.5632	34.2218	31.973	28.8801
L1MEh			7.55481	7.56317	11.2157	15.5716	34.2671	9.42395	18.6181	22.9435	12.455	22.4436	13.6235	38.9351	34.1085	43.9104	34.4659	31.4773			27.298	42.985	43.59	48.4715	47.6302	48.324
L1MEi			14.5489	14.3319	26.147	30.6798	59.8714	17.0014	39.1926	54.2056	28.5613	49.2599	29.0816	76.0968	66.9879	89.5527	72.2018	62.1635			49.2862	81.0987	88.7181	94.7214	92.6464	96.5287
L1MEj			10.5327	8.92489	16.0538	20.981	36.3047	8.91055	23.2415	25.1376	17.0993	25.5906	17.3901	55.507	55.1332	61.2929	49.6166	45.3012			42.2404	50.2434	62.039	65.4151	64.6054	73.9583
L1P			0	0	0	0	0	0	0	0	0	0	0	0	0	0	0	0			0	0	0	0	0	0
L1P1			16.4017	16.4849	25.0578	36.5653	61.9787	14.3965	38.6013	35.9906	24.8273	38.65	22.0069	73.2243	54.6062	85.7387	74.3171	61.3676			47.0751	77.7371	67.4703	76.8003	75.0622	73.1068
L1P2			21.2149	26.0082	32.6605	44.4039	96.051	20.4611	58.4567	50.6624	28.7763	51.3838	30.1295	83.2783	86.0347	111.596	88.2139	97.4537			86.1036	164.054	114.348	147.378	158.876	145.625
L1P3			21.6335	19.8947	28.5311	43.1427	82.2613	20.5249	50.8565	43.2789	37.1369	48.7458	30.8807	76.266	54.4001	89.5804	71.7347	61.3654			60.2999	92.7382	92.7311	111.217	112.389	110.828
L1P3b			0	0	0	0.405437	0.843146	0	0	0	0	0	0	0.450814	0.436353	0.456259	0.403459	0.441032			0.948038	0.496167	0.625867	0	0	0
L1P4			12.1333	7.36029	19.095	22.2676	45.5484	11.6989	25.7066	29.4334	15.6656	27.7272	16.5805	44.5951	44.6003	55.1654	47.3924	38.3019			32.6169	42.5866	49.6854	56.7713	53.8693	55.6801
L1P4a			2.34336	2.71633	5.47126	7.76964	14.3733	2.20168	6.41654	7.05755	4.23763	8.17173	3.9161	11.3105	9.15724	13.3692	9.55749	11.9701			8.4505	11.663	11.4563	14.5341	12.9758	14.881
L1P4b			1.60581	2.81366	2.17034	2.16707	5.84179	3.19524	1.42278	0.824489	1.40405	1.38479	1.44308	1.96364	2.35944	4.17476	3.53697	2.76119			2.68134	1.61063	1.08665	2.44507	2.36745	2.39731
L1P4c			0	0	0	0	1.10927	0	0	0	0	0	0	0	0	0	0	0			0	0.528336	0	0	0	0
L1P4d			0.439334	0.662404	0.668896	1.58426	3.89264	0.695645	1.04616	1.69063	1.12989	2.27406	0.886216	1.7953	0.572226	2.01644	1.2387	0.903128			1.49482	1.50862	1.17264	1.92526	1.90001	1.7844
L1P4e			3.72096	4.95681	3.95084	4.39267	7.79093	2.08396	4.1516	2.83492	2.38155	3.23858	2.05754	3.45215	3.31376	5.89775	4.39952	4.06479			2.86787	2.86276	2.79849	2.85009	2.82269	2.51392
L1P5			0.588085	0.473187	1.27557	1.44131	2.80224	0.681138	1.901	2.61532	1.10711	2.43809	1.30491	5.5468	4.64502	5.28975	3.84842	3.3252			4.1143	4.44267	5.02034	8.1514	7.15387	7.87337
L1PA10			107.585	237.409	260.201	209.348	335.818	389.386	251.716	315.284	256.246	324.283	195.381	305.573	342.777	466.085	344.869	339.026			255.513	343.109	235.575	320.343	295.109	329.669
L1PA11			37.6679	43.9983	61.9252	83.0738	167.088	34.5551	88.1086	88.4747	74.9376	98.4192	53.6947	119.389	77.3477	133.937	122.847	88.8481			72.8298	89.2386	95.9179	122.046	131.798	127.1
L1PA12			13.6513	26.5687	28.0775	38.0143	77.234	17.1873	38.2142	39.0218	21.1953	35.6931	20.7974	81.5451	57.9243	124.421	85.7533	72.3102			49.3347	67.6796	54.0673	72.6927	59.8817	68.3871
L1PA13			55.9345	55.6883	95.6173	129.178	280.873	51.603	110.562	118.841	88.9584	122.216	66.4679	208.543	140.009	228.565	176.32	157.696			138.036	179.991	169.558	206.416	188.814	198.477
L1PA14			25.7849	20.3265	38.3187	49.3093	114.869	24.8542	50.6928	53.6825	44.7456	58.2404	35.2863	89.561	62.9687	90.1743	65.7022	66.8688			58.5179	83.0543	84.1259	100.719	101.368	104.733
L1PA15			35.2662	36.7297	68.8241	99.404	265.045	41.8809	90.5551	104.585	58.101	104.499	54.0389	163.486	123.09	178.178	134.954	126.975			116.913	156.427	143.009	165.384	166.296	176.315
L1PA15-16			3.05233	3.47582	6.55954	13.3626	29.4515	4.89244	11.5165	12.3348	9.90227	13.093	8.0105	18.4699	15.4246	22.3835	18.6371	14.7354			14.489	21.9923	22.5661	26.1569	24.0345	24.0537
L1PA16			77.9385	74.7912	134.361	174.989	382.955	74.1151	151.927	186.092	111.073	188.639	100.203	301.161	253.386	336.479	251.228	237.639			223.358	329.825	298.793	318.882	328.371	348.525
L1PA17			34.7004	27.9036	50.9596	58.923	152.873	30.2881	63.2714	77.6613	45.7769	76.3158	40.6913	100.63	85.1802	108.871	84.3977	77.0638			70.4244	85.4337	81.1292	98.3514	96.9159	102.211
L1PA2			39.3096	41.4298	63.2583	86.8817	158.704	39.9038	84.9149	77.3926	55.6764	86.1942	46.3155	129.966	99.6674	156.551	117.007	120.406			110.732	145.01	106.69	137.308	131.553	129.8
L1PA3			127.456	135.902	186.232	259.251	402.086	119.181	260.107	246.474	166.254	255.89	152.829	397.59	324.171	478.175	385.679	355.141			335.911	452.53	366.948	456.188	430.83	436.484
L1PA4			130.653	143.71	202.001	286.261	438.13	133.826	311.047	293.878	207.762	312.082	181.14	410.544	367.183	546.708	446.666	411.247			354.961	513.86	460.932	539.442	548.109	552.718
L1PA5			126.966	147.607	205.285	276.553	443.371	122.57	281.316	295.87	176.428	298.458	163.468	433.754	376.701	590.025	470.237	436.923			341.863	469.734	401.399	498.381	471.443	472.913
L1PA6			100.728	124.468	165.638	209.556	413.397	90.9604	244.69	213.187	137.632	225.037	121.028	382	301.863	469.911	370.656	328.865			288.556	435.41	334.228	405.844	383.229	383.534
L1PA7			185.495	180.799	255.21	363.964	721.593	168.781	366.238	375.184	241.251	374.781	205.602	561.795	376.641	641.805	522.268	442.437			376.783	574.081	473.864	562.288	552.291	560.08
L1PA8			58.5702	57.2824	80.1605	114.254	219.998	49.3079	93.1657	114.274	70.3073	115.249	60.8319	168.054	130.874	205.564	159.547	155.387			136.135	176.605	150.649	179.103	177.605	184.442
L1PA8A			22.6705	21.5243	30.9155	44.7762	94.7052	19.5617	38.3424	41.9042	29.7577	44.6946	24.2483	67.0702	45.4683	75.7383	51.3545	48.3877			38.3511	50.4143	42.1738	49.4405	47.4722	50.9691
L1PB			6.50214	5.93197	12.649	15.4459	36.9732	7.36105	18.4552	19.9684	13.7112	19.4914	11.3608	35.9816	29.887	42.5201	33.8772	27.3887			21.7229	36.8643	41.6854	46.4256	40.535	43.2743
L1PB1			76.1042	81.8373	144.164	199.657	538.159	86.8289	238.431	248.451	171.473	265.437	132.525	352.043	254.073	445.705	375.359	299.511			255.936	417.637	367.756	509.066	448.803	466.61
L1PB2			10.9865	11.7534	23.0312	30.4303	83.2773	13.3012	33.522	34.6708	18.8422	33.8991	17.0303	65.6697	57.7105	72.0343	62.4978	55.5922			46.1753	63.9409	51.984	66.5494	64.9992	66.3175
L1PB3			13.5576	13.4372	25.6455	33.9024	85.6923	17.781	39.144	38.7698	23.8525	41.2905	21.5852	58.2449	43.8917	61.3955	48.7257	43.9024			39.4318	54.2028	50.4042	58.6513	58.785	58.1981
L1PB4			29.3136	27.6442	57.3817	65.3983	145.852	34.6661	70.6744	90.2897	51.0971	79.3408	43.9234	131.681	112.489	157.593	130.075	113.072			113.491	149.705	150.566	163.701	154.401	166.849
L1PBa			13.0713	12.9669	21.1017	31.8383	85.3017	12.7442	27.9871	34.0068	19.6657	37.02	18.9656	51.4761	40.1609	60.1439	47.5201	41.4632			37.9137	59.3588	52.8378	64.5424	58.2907	55.4156
L1PBa1			3.07902	4.16454	6.27176	8.62216	23.8862	3.41389	7.42117	9.40425	6.1041	9.51787	5.43543	23.1794	17.4184	20.7109	18.32	16.0357			18.3388	15.5236	11.509	16.3694	16.4053	14.9325
L1PBb			1.38747	1.80987	2.72225	4.6545	13.5654	1.88983	3.49799	5.55844	2.14584	5.32073	2.73083	5.34323	5.42076	6.6772	5.57089	8.08929			8.44902	9.99881	5.94374	8.31482	7.83985	7.53261
L1PREC2			37.2704	45.5889	71.673	101.578	233.063	46.6912	96.1904	112.909	70.6306	116.08	68.7797	253.964	244.861	292.717	237.498	215.115			173.067	226.37	199.974	243.408	234.299	246.371
L2			291.444	416.708	636.253	621.887	1295.9	423.923	928.606	1177.51	647.308	998.094	609.842	1592.7	1417.73	1755.36	1417.25	1477.76			1327.38	1975.47	1657.98	2204.81	2156.19	2178.96
L2-1_AMi			2.58263	3.76908	9.17259	6.50725	14.0083	5.34728	15.0979	18.375	10.1632	13.7216	6.84134	15.196	13.2405	17.9249	13.7712	14.8398			14.4339	20.4645	17.1617	24.3447	25.9428	24.7488
L2-1_Crp			0	0	0	0	0	0	0	0	0	0	0	0	0	0	0	0			0	0	0	0	0	0
L2-2_Mam			0.941926	0.735731	1.44668	1.60784	3.29545	0.665285	2.73509	2.70051	1.25565	2.59884	1.78024	8.87849	7.69131	8.00679	7.46255	6.12477			7.78818	8.33518	7.12422	10.9488	9.37344	9.30828
L2-3_AMi			0	0	0	0	0	0	0	0	0	0	0	0	0	0	0	0			0	0	0	0	0	0
L2-3_Crp			7.19648	9.56841	19.576	17.2775	35.9986	13.8525	26.2687	37.7387	19.2605	30.1117	15.5678	42.359	35.0549	47.1923	40.586	38.529			34.3933	49.4081	40.952	56.811	57.4304	56.1007
L2a			838.419	1093.03	1676.27	1751.85	3515.35	1129.36	2443.41	3198.13	1624.66	2706.32	1639.28	4333.8	4202.45	5040.14	4192.51	4258.71			3802.65	5369.68	4590.05	5746.93	5810.21	5876.9
L2b			388.301	562.085	746.431	832.477	1761.72	581.669	1241.66	1633.67	816.826	1382.51	890.103	2364.18	2437.24	2827.11	2371.7	2632.38			2275.55	3455.67	2982.9	3596.46	3616.23	3632.84
L2c			560.401	729.193	1066.52	1191.19	2264.77	724.099	1581.93	2037.34	1079.97	1792.66	1085.24	3230.39	2996.41	3789.87	3141.1	3207.8			2757.82	3777.76	3386.84	4276.35	4263.39	4354.56
L2d			84.6648	107.556	175.394	192.886	368.877	118.523	270.17	347.417	175.653	301.045	183.551	756.616	707.089	837.508	706.829	675.025			563.149	746.653	714.771	857.678	870.037	851.012
L2d2			181.351	209.073	330.945	371.737	681.255	235.04	499.043	626.597	336.663	554.127	335.902	1242.66	1170.56	1398.38	1180.82	1166.05			1021.97	1370.01	1229.81	1498.23	1472.03	1472.41
L3			228.692	250.068	350.011	410.567	683.006	263.08	576.889	633.136	317.184	576.351	378.37	1344.17	1272.62	1521.92	1306.41	1287.42			1139.79	1587.69	1493.85	1678.5	1627.04	1584.02
L3b			32.5923	36.5888	50.5194	60.7886	114.533	43.4828	95.7679	104.691	55.9046	97.7223	65.3391	285.032	272.674	305.416	285.76	286.366			238.859	295.36	307.149	343.714	313.085	301.307
L4_A_Mam			36.9476	34.6868	61.9295	68.1711	118.018	37.4569	78.0802	91.7446	44.4005	89.3394	54.0422	160.717	137.349	173.477	140.454	133.673			113.371	146.024	141.13	172.014	167.232	167.08
L4_B_Mam			12.7629	14.2304	22.1125	27.4732	46.3032	13.5933	30.4078	37.4505	14.5377	34.7748	19.6857	66.6186	55.5508	72.2468	58.6799	56.1203			50.0687	67.1888	70.5458	74.9433	68.2368	75.0157
L4_C_Mam			18.608	18.7108	31.8734	36.1007	61.9593	21.4887	43.1743	52.5224	29.6291	53.0557	34.0161	152.974	157.106	222.136	209.676	162.601			115.838	170.139	194.697	181.178	175.917	162.79
L5			1.85658	1.89496	4.27751	4.39421	8.07401	2.89384	7.40225	10.1367	3.68645	8.18869	5.11446	18.2467	17.1257	21.1824	15.9399	15.4052			10.5833	17.1499	19.3155	22.6408	22.8647	22.4831
LFSINE_Vert			7.89864	9.41051	14.2154	16.2729	31.1556	13.9317	16.8638	25.2525	17.3978	29.8242	21.7679	180.861	164.243	205.281	182.804	246.513			217.464	172.448	145.645	179.521	149.079	147.237
Looper			2.81885	1.59568	6.26834	6.05484	9.98623	3.20469	7.77821	9.26472	2.93013	8.81985	4.47283	25.7245	20.9455	23.2079	18.809	12.5073			9.98212	14.6598	17.1316	16.3378	17.7817	16.1857
LOR1-int			39.5723	32.3421	36.3071	44.9115	44.7712	24.1241	36.3973	33.1873	28.4062	37.9869	34.6703	68.5253	55.8404	87.3243	72.6082	59.5268			41.9554	43.4962	54.3034	55.5045	53.3431	54.3626
LOR1a			4.674	6.4672	8.06565	8.04917	15.1292	4.82056	8.8694	9.82663	6.36739	9.09372	6.36117	16.3487	20.6552	21.8518	17.5044	20.7909			23.2719	44.6151	38.06	44.5994	46.7662	43.4934
LOR1b			4.38017	3.88749	5.3745	6.88354	13.9398	4.64493	8.80382	10.2123	6.42685	9.24667	7.36286	10.2671	9.42436	12.5291	12.7929	11.0059			12.9652	18.9454	14.9863	19.7519	16.6266	17.9788
LTR06			0	0	0.668896	0.781336	0.497597	0	0	0.464943	0	0.486625	0	0.550066	0.461381	0.495202	0	0.458747			0	0.477279	0.506678	0	0.490063	0.446245
LTR1			0.480247	0.793977	0.980011	1.59285	3.48809	0.659307	1.35412	1.75764	1.63606	1.90943	1.06414	2.57282	1.87902	2.37596	1.71104	2.21317			2.23702	3.13822	1.94598	3.15946	2.71293	3.23907
LTR101_Mam			2.98817	3.74827	6.33118	7.47536	16.3601	4.20842	10.4434	13.9505	8.26084	13.1731	9.23486	14.4218	13.7868	18.8319	14.7394	15.2588			15.0346	24.3926	23.3381	28.151	27.0129	29.4191
LTR102_Mam			1.03986	1.42639	1.72669	2.86258	6.41556	2.19029	3.57204	4.62258	2.34349	3.5566	3.61763	12.4772	11.556	13.1131	11.7764	10.0093			10.5331	10.0692	9.57536	11.8061	12.1411	12.5302
LTR103_Mam			2.01218	2.22812	2.7907	4.24675	5.61545	3.74283	6.71007	5.83001	5.38441	6.31295	4.78794	4.36466	4.7931	6.58647	5.18669	6.23015			5.73513	11.0393	7.87274	10.3606	9.33901	10.0344
LTR103b_Mam			0.744731	1.1544	1.54002	2.09299	5.44426	1.19627	2.21424	3.07892	1.58111	2.90156	1.57105	5.61342	5.8636	7.28814	5.84636	5.34638			3.90657	4.9197	3.81977	5.52207	4.77379	5.15299
LTR104_Mam			5.2272	5.12116	6.26896	8.40153	18.029	5.56348	9.93109	12.4124	7.46691	11.9897	8.25246	17.0053	20.2277	24.7359	21.8516	25.3513			20.2675	29.1981	29.7499	30.2503	29.0999	29.728
LTR105_Mam			1.71403	2.48158	2.51474	3.204	6.69122	1.80565	3.51282	3.61561	1.69223	3.66679	2.2431	5.40784	4.05026	6.24952	4.66241	4.76468			4.06848	4.01714	3.24812	4.75292	3.97446	4.04418
LTR106_Mam			1.63228	1.35863	2.62892	2.95038	4.83732	1.78699	3.04841	3.3138	1.44128	3.01593	2.09011	6.50762	7.41871	8.21048	7.78233	6.43404			4.47988	5.0166	5.976	6.33779	6.08526	5.85196
LTR107_Mam			0.708416	1.12406	2.0378	1.81943	3.80467	1.06791	2.13039	3.38787	1.89194	2.99058	1.74652	4.51009	4.83251	5.78855	5.50199	4.69328			4.62626	7.40496	7.02075	6.50711	7.0871	7.30209
LTR108a_Mam			1.96532	3.01039	4.35032	3.83526	4.14626	2.23006	4.7997	4.52819	2.09174	4.55108	3.18037	3.21867	6.90822	6.5945	6.90582	6.25504			6.60919	12.2036	11.1399	13.1326	13.5404	10.8928
LTR108b_Mam			0	0	0	0	0	0	0	0	0	0	0	0	0	0	0	0			0	0	0	0	0	0
LTR108c_Mam			0	0	0	0	0	0	0	0	0	0	0	0	0	0	0	0			0	0	0	0	0	0
LTR108d_Mam			0	0	0	0	0	0	0	0	0	0	0	0	0.420365	0	0	0			0	0	0	0	0	0
LTR108e_Mam			0	0	0	0.682616	0.746905	0	0	0.608686	0	0.410896	0	0.873521	0.864389	0.962065	0.955859	0.841097			0.762377	0.968894	0.840133	0.783615	0.854868	0.982585
LTR109A2			0	0	0	0	0	0	0	0	0	0	0	0	0	0	0	0			0	0	0	0	0	0
LTR10A			1.95538	2.22918	3.90449	3.39287	12.838	2.92145	4.20336	7.25981	4.54376	5.2404	3.50965	10.1085	8.5119	8.61438	6.22998	8.32065			7.6178	9.0817	7.67502	10.4491	10.1965	10.9942
LTR10B			0	0	0	1.63144	1.56718	0.597712	0.44144	0.701909	0.590991	0.466418	0	1.82962	0.66261	1.20662	0.671933	0.668745			0.649958	0.819703	0.417403	0	0.700787	0.709842
LTR10B1			0	0.498589	0.544451	0.82179	2.1809	0	0.980545	1.7511	0	1.55541	0.745261	1.46396	0.991022	1.5768	1.11224	1.22947			1.08299	1.90165	1.33731	1.65798	1.66846	1.94322
LTR10B2			0	0	0	0.554199	2.2765	0	0.669698	0	0	0.542686	0	1.12866	0.751368	1.07617	0.691948	0.611632			0.694243	0.521307	0.606309	0.703388	0.721587	0.610184
LTR10C			3.45605	4.77115	7.3199	7.53022	15.8601	3.45121	8.29301	11.3776	4.05516	9.38048	5.78893	28.0437	29.4613	27.7221	20.0822	21.4061			20.9629	24.5554	23.2623	27.8347	26.849	28.4039
LTR10D			1.21048	1.22465	2.10002	1.98434	6.1942	2.05329	3.74042	4.933	5.60672	6.62576	4.26324	3.40618	2.84124	3.45235	2.67103	2.77909			3.94313	4.10939	3.57502	3.06867	3.61034	3.94338
LTR10E			2.82536	3.12867	3.99782	4.75111	6.67968	2.61929	4.54923	6.86785	2.88787	6.15859	4.45361	9.93455	11.5846	15.4887	9.89102	12.649			8.54851	11.7759	11.7632	14.1295	13.8187	15.4036
LTR10F			0.927967	1.30718	2.25558	2.12179	7.42486	2.08775	3.8197	4.99396	4.10546	3.7335	2.50927	3.49568	2.9418	4.15505	2.93049	3.64076			4.28725	5.66561	4.5498	8.46482	7.01981	7.36624
LTR10G			0.764256	0.943003	1.92144	2.21638	5.14291	1.40699	1.56655	2.54778	2.20895	2.59409	1.853	2.57927	3.31699	3.65601	2.86676	3.31825			4.68796	5.26594	3.98441	4.03172	4.03704	4.08362
LTR12			5.50914	7.15299	6.88092	10.598	23.5679	6.22557	11.9199	14.4033	7.58557	14.2889	10.5059	12.8284	13.2149	16.6315	13.3085	15.2064			13.5975	16.7976	15.7906	17.1779	16.5101	17.8059
LTR12_			4.20184	5.82974	4.94672	6.76409	17.5977	3.78001	6.96316	8.51355	4.37595	7.96196	5.75204	12.8682	16.6036	18.4125	15.2839	21.233			20.3231	20.1136	13.95	20.6336	18.8146	21.3571
LTR12B			0.844831	0.890352	1.44668	1.59294	4.1149	1.25727	2.33393	2.0348	1.27855	2.2012	1.30936	3.96117	4.79983	4.52925	3.71446	4.70855			4.94834	7.39268	6.88246	7.46263	7.96634	8.66149
LTR12C			49.1906	68.1817	60.3264	90.1113	254.326	76.4456	154.457	160.926	102.031	141.344	110.478	123.47	144.986	149.451	119.593	146.167			132.293	236.179	192.954	225.036	209.276	212.214
LTR12D			3.22029	5.21546	4.97503	7.40954	16.9896	4.36246	9.73285	9.21802	5.2294	7.02965	6.08157	7.3069	12.0134	10.9661	8.52626	13.5217			14.3324	17.8557	10.9183	14.964	14.2706	15.3565
LTR12E			3.11319	6.00048	3.23248	2.86074	10.3689	3.96766	4.08349	6.83189	4.32021	6.11374	4.84552	4.4604	4.67708	4.6219	3.6779	4.92554			4.18127	6.61712	7.20392	10.3034	10.2675	16.5186
LTR12F			3.42563	5.80254	4.94672	5.50919	13.378	3.45902	6.50185	7.79104	5.25143	7.96548	6.97915	7.95761	9.61364	12.0785	9.64471	10.9434			8.43856	10.2346	9.02928	12.7365	13.5312	15.0277
LTR13			40.7047	51.1958	45.0901	54.091	77.9863	53.4138	74.7535	84.3866	61.2918	74.3711	70.2141	71.8165	107.061	102.198	90.485	107.674			95.2784	139.342	134.958	134.974	131.956	137.083
LTR13_			1.31203	1.59762	1.31913	1.32256	2.91519	1.14015	1.31221	2.22144	0.86895	1.66094	1.31672	1.49516	2.90136	2.43716	2.16132	3.23062			2.66878	2.51275	1.52461	2.27188	1.75687	2.07775
LTR13A			10.9865	17.3836	18.6877	18.1223	28.6221	18.3997	22.2313	30.6633	20.4974	27.2089	26.3171	17.9033	27.5123	28.3651	24.3687	31.8093			27.9627	57.4914	56.013	50.3237	55.9411	58.7156
LTR14			2.4037	3.03723	4.08649	3.83651	6.26032	2.37225	5.06294	8.33179	4.50075	6.16685	4.94123	5.10312	7.15158	6.96413	7.004	7.6685			7.23132	10.7771	8.94714	11.3625	11.0868	12.0105
LTR14A			0.775681	1.04522	1.63584	1.5997	3.00533	0.755683	1.92734	2.39563	1.5205	2.42174	1.44614	3.12976	3.33848	3.29908	2.7044	2.88298			3.27212	5.24414	4.4428	5.96003	4.89808	4.825
LTR14B			2.62745	3.60779	4.1036	4.67765	8.95564	2.43759	4.52183	8.24055	2.07624	6.74724	4.22212	15.6463	18.0022	21.272	19.5924	18.9845			14.5148	17.4893	19.9965	23.5434	23.1647	21.7111
LTR14C			0	0	0.653341	0.583142	1.5939	0.538626	0.977953	1.33483	0.69109	1.2801	0.613858	1.36001	2.05032	1.91339	1.61446	1.81585			2.86482	3.99173	2.72088	3.70923	3.89338	4.35811
LTR15			1.13328	1.90116	4.18605	3.14135	6.37733	3.95267	6.21459	9.09078	5.02198	8.49484	7.10098	21.4433	18.2512	18.3551	17.3934	16.1564			14.8017	18.5725	19.7694	18.8431	19.8165	19.7521
LTR16			9.47237	14.0121	14.2957	18.9806	37.9031	12.9751	23.151	24.6162	13.7701	22.1881	15.8657	24.3927	25.8784	34.8558	31.0039	32.7078			27.0381	39.8642	31.3946	36.4428	34.3582	34.1998
LTR16A			10.8506	19.1011	20.0355	27.5822	58.9286	18.1839	31.0487	38.5771	21.9772	36.1402	24.8636	37.5383	39.3851	54.874	45.1041	49.3789			44.7691	67.4215	53.1091	62.6965	57.2813	58.0947
LTR16A1			6.94148	14.1587	13.3561	19.8113	47.3118	11.3259	22.8314	29.767	17.5863	25.5968	17.4019	32.4897	37.9384	47.209	38.9005	46.5396			42.3466	79.412	71.906	75.3166	73.4857	71.9057
LTR16A2			5.07017	6.39605	7.27013	10.7411	22.2735	6.78672	12.4949	15.87	9.34045	14.355	9.43825	19.8196	19.6759	28.9019	22.644	27.7585			32.574	79.5057	55.6356	49.8983	53.7785	49.6337
LTR16B			2.69953	3.98068	4.89974	5.64441	12.2971	4.11281	9.68883	9.4058	6.23879	9.68232	6.78273	9.00302	7.2443	11.6373	8.78742	9.46765			8.29944	11.7546	12.1527	17.4025	12.919	15.2422
LTR16B1			3.91247	6.40809	7.14008	8.77139	20.1911	5.48138	9.44543	12.1736	6.95825	11.6558	8.36079	15.4419	11.8485	14.7475	10.5207	13.4468			10.5207	13.552	12.7026	15.9505	13.9675	14.3958
LTR16B2			4.97883	6.38051	7.7312	9.72496	23.9641	6.60956	10.7665	14.8784	7.79454	13.2107	9.27316	16.9165	21.278	22.8262	19.8658	21.8564			20.3285	27.2418	22.1404	25.8599	23.9026	27.8213
LTR16C			39.9868	44.4603	45.8045	63.7767	100.289	34.3782	67.6137	78.22	47.2977	74.6077	50.9338	80.4177	79.6069	115.513	85.1527	106.44			87.9713	143.522	143.848	153.097	145.759	136.562
LTR16D			5.58263	6.16027	5.0245	8.09338	12.654	5.62987	8.28827	11.6423	7.78794	10.5451	8.67241	8.52784	8.26009	10.9978	9.39011	9.57586			10.7206	13.4723	12.1633	12.3649	11.7361	13.6515
LTR16D1			1.53432	11.5298	3.81146	4.47212	6.89929	2.84506	3.95703	4.9341	3.22109	4.91248	4.5144	8.10371	7.30482	6.52636	7.16418	13.9476			9.67997	14.4776	6.82189	12.1888	11.2502	12.9309
LTR16D2			0.978977	1.435	2.00669	2.13528	5.80516	1.04326	2.3404	3.83449	1.71985	3.75804	2.11584	4.64167	3.06289	4.49035	3.32552	3.58827			3.31016	3.14584	2.50372	5.01879	3.68973	3.87462
LTR16E1			4.62611	6.95791	8.47787	12.4461	28.5291	6.23809	12.3733	13.6092	7.7601	13.7807	9.71717	22.8693	23.4847	31.1964	30.0705	29.0856			23.3178	27.9297	31.7287	33.2363	35.591	33.8366
LTR16E2			4.4381	6.20608	7.88675	12.3328	28.5507	7.24677	14.4123	17.9937	11.1257	17.4112	12.2697	28.6189	31.0914	37.3212	30.9966	32.7017			24.0631	27.6048	25.6695	32.3764	32.28	35.2911
LTR17			7.86572	9.36908	8.9097	11.1277	21.2821	10.4304	12.057	16.1185	10.4363	12.7354	13.1016	10.8947	11.304	13.0905	12.4563	14.0384			14.4286	17.9836	13.4953	16.1073	17.008	17.5646
LTR18A			1.25862	1.45794	0.731119	1.12645	2.10695	0.503796	1.13667	1.27568	1.24237	1.50714	0.968187	3.17145	1.93074	2.20641	2.39519	2.41918			1.44253	1.46932	1.06555	2.44275	1.78115	1.61042
LTR18B			1.36807	2.36741	2.52003	3.59818	6.14584	1.46865	2.13367	3.46411	2.44672	3.4338	2.18417	3.16606	2.85236	4.30189	3.20026	4.79745			3.11628	3.54441	3.52886	3.88773	3.6748	4.1021
LTR18C			0	0	0	0	0.685179	0	0	0	0	0	0	0	0	0	0	0			0.425581	0.748397	0.566413	0.614667	0.679365	0.592319
LTR19-int			1.85268	2.23964	3.89671	4.06141	7.08303	2.04245	4.164	6.14529	2.5269	4.84242	2.68715	7.72389	5.95952	8.60833	6.05151	5.43756			5.59042	5.87295	5.15012	6.60415	6.08006	5.62638
LTR19A			2.70485	4.83966	5.99673	6.87419	13.2549	4.26572	9.25953	7.44837	5.87814	6.94902	4.08168	8.86022	9.78331	12.7368	10.5963	12.7215			11.4905	18.055	14.2745	15.9186	17.8301	16.2356
LTR19B			0.975551	1.18469	1.78891	2.35085	4.8393	1.61372	2.34405	2.93319	2.32019	2.76581	1.94952	2.63101	2.9545	3.81766	2.96788	3.62892			4.06054	4.96081	4.46765	4.33294	4.52044	6.54369
LTR19C			0	0	0.637785	0.947034	1.95486	0	0.836414	1.26735	0.875567	1.16274	0.784469	2.2131	1.3526	1.96803	1.29968	1.52979			0.993231	1.2584	1.57963	1.56747	1.43142	1.65169
LTR1A1			4.66722	5.7868	7.94898	9.61734	16.8634	5.56366	8.79411	9.16371	4.2483	7.62415	5.9755	4.34821	5.52617	6.14509	5.54673	7.4736			6.01329	8.72064	5.27413	6.85387	7.00143	7.41448
LTR1A2			4.41926	7.141	6.08229	8.16607	28.2981	5.72563	13.67	13.0217	8.71148	12.3833	7.08313	14.2071	14.0415	17.5221	14.5251	16.5631			15.3784	22.2296	12.4732	17.8522	18.1731	17.1519
LTR1B			1.43107	1.69848	1.69557	3.11069	6.35406	1.47177	3.01596	3.83271	2.74477	3.34698	2.52143	3.18848	2.43591	3.69445	2.72274	3.39044			4.06904	4.84808	4.16927	3.13178	3.59482	4.5667
LTR1B0			0	0	0.482228	0.599234	1.20397	0.408412	0.671878	0.54962	0.510906	0.641216	0.4763	4.67576	5.72251	5.98372	5.63156	4.97802			4.8706	12.8656	14.4807	10.7971	14.6893	12.8201
LTR1B1			0.496083	0.749778	1.10446	1.31717	3.03397	0.930423	1.53709	1.15357	0.812909	1.62733	0.967307	1.07053	1.12181	1.33803	1.08422	1.17954			1.49554	2.13659	1.37117	1.9576	2.35221	2.43969
LTR1C			0.431262	0	0.544451	0.651341	1.75221	0	0.679081	0.837647	0	0.559071	0.608816	0.751995	1.12559	1.04114	1.06868	0.970251			1.18479	1.28221	0.846478	1.18459	1.27212	1.48389
LTR1C1			0.500943	0.813478	0.917788	1.54632	2.06846	0	0.52024	0.701747	0	0.535246	0.497318	0	0.589389	1.07307	0.683257	1.92473			1.80859	1.33826	1.19696	1.50915	1.0873	1.57871
LTR1C3			0	0	0	0	1.23626	0	0.447916	0.890665	0.451295	0.465325	0	0	0	0	0	0			0	0.43511	0	0	0	0
LTR1D			1.79225	2.05384	2.78479	3.96114	8.59906	2.94566	3.48293	4.39608	2.84763	4.47247	3.4288	4.79844	4.01878	5.9265	4.62448	6.14689			5.77806	7.21298	4.88561	6.37495	6.61367	7.77172
LTR1D1			1.54077	2.09326	2.5667	4.08087	8.21507	2.38259	4.00268	5.31697	3.85678	4.24214	3.11292	6.58318	4.84044	6.65838	6.85237	7.38419			4.79306	5.78397	4.29962	5.83932	6.3098	6.59355
LTR1E			0.725797	0.793803	1.19779	2.25693	5.94734	1.0415	1.35803	2.87433	1.22219	2.19642	1.1899	3.06022	2.15038	3.35892	2.41741	2.57419			2.6325	2.55415	1.51648	2.2248	3.07648	3.32674
LTR1F			0	0.54652	0.606673	0.985562	2.60526	0.635704	0.981293	1.37262	0.660662	1.33671	0.936444	1.52003	1.38033	1.39916	1.1372	1.24184			2.47049	2.22284	1.93541	1.67042	1.83633	1.99237
LTR1F1			0.770641	1.01475	1.26001	2.93546	4.14273	0.81565	1.21993	2.43318	1.108	1.71268	1.07883	1.29227	0.900555	1.76614	1.18838	1.79608			1.48331	2.1065	1.57461	2.54246	1.97748	2.02879
LTR1F2			0	0	0.513339	0.854686	3.06612	0	0	1.47882	0.411583	0.869628	0.458582	1.71364	1.35309	1.69462	0.938563	1.18176			1.07112	0.909475	0.585783	0.968837	1.13382	1.05944
LTR2			7.02736	10.7715	11.73	11.9669	33.7804	11.4144	14.7532	21.0591	12.1896	19.2214	14.2378	17.2148	17.8481	20.9996	18.4577	21.2362			28.0866	36.9127	24.7363	27.7404	27.5223	35.3536
LTR21A			1.38851	1.59521	2.10002	2.39523	3.27878	1.65074	2.25408	2.99265	2.35526	2.3308	1.44332	3.47244	3.27496	3.46939	2.65157	2.88232			3.46253	5.45478	4.41481	4.51983	4.9974	4.43647
LTR21B			0	0	0	0	0.825154	0	0	0.5012	0	0	0	0	0.506087	0.446347	0	0			0	0.585328	0	0	0	0.501276
LTR21C			0	0	0	0	0	0	0	0	0	0	0	0	0	0	0	0			0	0	0	0	0	0
LTR22			2.05709	1.58669	2.16225	1.77459	1.92373	0.833973	0.515383	0.567274	0	0.602163	0.426048	1.72058	2.88358	3.17682	2.74579	2.80788			1.6405	1.0655	0.894773	0.936458	0.813826	0.835714
LTR22A			0.430621	1.10835	1.15112	1.45688	3.53662	0.797021	1.00874	1.58284	1.02135	1.55134	0.893232	4.29007	4.30224	3.88376	4.0903	3.4748			3.09116	2.91163	2.28721	3.34069	2.53669	3.13851
LTR22B			0.613279	0.743356	0.980011	1.53727	3.80739	1.07006	2.04151	3.47864	1.21957	2.87677	2.0365	2.12232	1.72732	2.40093	1.78296	2.29364			1.48814	2.11335	1.92561	2.28598	1.99038	2.04542
LTR22B1			0	0.484783	0.606673	1.2447	1.36458	0.901485	0.853454	1.53529	0.522557	1.06545	0.507128	1.96471	1.85233	1.9811	2.06172	2.08721			1.33635	1.92307	1.51848	1.99739	2.05757	2.04683
LTR22B2			0.699542	0.750741	0.762231	1.03574	2.53182	0.749395	1.61902	1.1061	1.03635	1.19131	1.19913	2.34562	2.79055	2.72601	2.15428	2.73506			2.28388	2.63277	1.96678	2.84193	2.68081	2.24136
LTR22C			0	0.419223	0	0.752048	0.58108	0.630544	0.867387	1.1753	0.512335	1.52842	1.4177	0.9574	1.37101	1.63836	1.67771	2.0741			0.848401	1.32552	2.75234	4.10671	3.24831	3.37459
LTR22C0			0	0.561654	0	0.671574	1.51328	0.401762	1.33231	1.14694	0.704423	1.47382	0.89019	1.62471	1.20522	1.95826	1.05089	1.25129			1.33558	1.62032	1.6615	2.49936	2.29774	2.20855
LTR22C2			0	0	0	0.524931	0.853143	0	0.815118	0.481693	0	0.411166	0	1.6225	2.07938	1.47596	1.82759	1.69665			1.21125	1.3533	0.996786	1.2835	1.31413	1.12137
LTR22E			0	0	0	0.494017	0.99113	0	0.467121	0	0.590962	0.471104	0	1.03435	0.614163	1.18108	1.04698	0.884118			0.805246	0	0.479108	0.576761	0.624967	0.514399
LTR23			2.61675	3.31759	4.52672	4.9281	10.599	3.2799	4.92477	7.59781	3.60714	6.94109	4.36097	12.4913	12.4323	13.1437	11.452	10.7679			10.7604	14.4005	15.2256	14.5235	15.3745	16.5314
LTR23-int			0.599887	0.455006	1.16668	1.33246	2.34036	0.641565	0.984778	1.56799	0.921499	1.96789	0.873528	2.12293	3.46864	5.24097	3.95923	4.57993			2.82465	3.06701	2.9571	4.61536	4.01966	4.78476
LTR24			4.19198	4.58382	6.61119	6.16269	12.7143	5.05706	6.55152	10.958	5.45094	8.98995	7.33881	10.1947	14.2758	11.4376	9.52856	10.3565			9.79173	12.6234	11.4377	10.685	11.3335	12.7068
LTR24B			2.73669	3.70889	5.8334	5.68897	11.0112	5.64339	8.01023	12.925	5.82335	11.1417	8.89128	13.5743	17.2368	16.3767	13.883	14.308			16.269	23.2781	25.1554	26.3013	24.5363	29.2736
LTR24C			0.831339	1.00587	1.97558	1.95883	4.40547	1.02137	2.65942	3.80852	1.65867	3.54232	2.06368	6.12891	6.26609	7.67114	5.62896	6.43489			4.27899	7.02976	8.67403	10.7938	7.81948	8.9224
LTR25			1.9891	2.29805	2.46683	3.06703	8.20423	1.84479	2.67097	4.40594	2.39624	4.73442	3.64271	5.65048	6.05535	6.69352	7.49772	6.9297			5.73717	6.20187	6.17727	7.19517	7.9647	8.31186
LTR25-int			6.28956	4.9538	8.69316	9.86736	19.4139	6.68496	11.5757	14.8937	8.64653	16.7865	9.86735	23.4812	26.3368	28.1288	23.0421	22.0465			22.2393	30.577	30.3605	31.6879	32.1816	33.1875
LTR26			2.17385	3.14715	4.02925	4.46014	11.3535	2.72361	5.9314	6.11024	3.66211	6.0795	4.78649	5.17067	8.46255	9.73961	9.20141	10.8116			10.4497	11.2252	7.86144	9.26587	8.95628	10.4134
LTR26B			0.500033	0.653265	1.04223	1.41519	3.00932	0.591763	0.886103	1.51904	0.619875	1.20681	0.731477	2.01486	1.31504	1.76621	1.42526	1.48987			1.39267	1.84353	1.96644	1.61931	1.7251	1.78262
LTR26C			0.4005	0.680119	1.26001	1.48656	5.78408	1.99777	2.27508	3.83452	1.26237	2.47571	1.73051	2.15371	1.94317	2.52791	2.00093	2.92619			3.01389	6.06341	3.36718	4.80659	4.3566	4.24258
LTR26D			1.19949	1.0256	1.94416	2.19591	3.52402	1.40736	1.84593	3.16622	2.45854	2.92966	2.26181	3.11638	2.3264	3.07619	2.69677	2.66182			2.1175	2.17139	2.80759	3.74641	3.3231	3.73388
LTR26E			0.861085	0.864525	1.50891	1.41703	4.30745	0.837945	0.545092	0.959122	0.77523	0.960247	0.884599	2.71295	2.18048	2.37014	2.16456	2.01086			1.55283	1.22771	0.84642	1.44306	1.04389	1.3127
LTR27			0.950203	0.991761	1.44668	2.06573	6.3015	1.97702	3.99271	3.55794	2.72947	3.55648	2.55062	3.20055	2.55048	3.44058	2.57825	2.94871			3.34446	5.07556	4.69865	5.01606	4.94069	4.98488
LTR2752			0.822802	1.49493	1.63335	2.59661	7.69397	2.18073	3.14048	5.24202	4.11599	5.04613	3.41531	3.19852	2.5403	3.79603	3.44379	3.0372			3.20916	4.35458	3.77818	6.8532	5.05115	5.34443
LTR27B			3.79067	5.99691	3.4067	4.121	7.91413	2.869	4.9137	5.58114	4.68881	6.01265	5.69096	3.95454	7.14157	9.17931	7.76091	6.73387			7.70271	10.452	9.89787	11.7843	13.0947	14.7976
LTR27C			0	0.462396	0.544451	0.98041	1.77074	0.637079	0.948901	1.56964	1.17246	1.45872	0.830268	2.12541	2.63567	2.30973	2.40747	2.28069			2.28511	2.3504	1.66751	1.7494	2.28822	2.03118
LTR27D			0	0	0.668896	1.25489	2.34549	0.602976	1.35795	1.26139	0.692127	0.863253	0.561562	1.28116	0.919673	1.43803	1.03489	1.70047			1.79979	2.48675	1.69618	2.59816	2.79614	2.7148
LTR27E			1.32668	1.6966	1.94447	2.32654	5.45461	1.4053	1.57707	2.74472	1.2412	2.5612	1.37252	3.13601	3.27866	3.46263	2.82557	3.16896			3.21077	4.50549	3.44907	3.41684	3.28756	3.36949
LTR28			0	0	0.668896	0.938429	2.0462	0.573419	0.891289	1.34019	0.630413	1.38968	0.528836	1.35629	1.475	1.64488	1.4114	1.82787			0.950286	1.81044	0.974341	1.64883	1.51837	1.40587
LTR28B			0.635733	1.07639	1.04223	2.14692	6.16843	1.02604	1.83189	2.78103	1.31263	2.59081	1.44792	3.19906	2.46114	3.43689	2.33753	2.8879			3.02697	5.37454	3.63532	5.20085	4.69579	4.98206
LTR28C			1.89177	4.36088	3.56226	3.70215	10.3966	2.2611	4.17363	6.49473	3.45461	5.35032	3.4889	8.41789	7.36197	7.77589	7.22093	7.42857			5.93864	7.35418	5.09362	6.90691	7.30185	8.53582
LTR29			2.49318	4.04514	9.615	5.30102	9.53447	5.36979	6.21847	16.3337	6.34739	20.4234	15.789	11.1444	12.8436	17.5817	16.1989	15.4502			13.2598	16.9871	22.4152	32.1871	26.2374	26.2038
LTR2B			5.45823	8.94185	8.43587	10.2945	18.7883	8.03068	14.1405	13.6547	6.96671	10.7928	8.78607	5.52187	10.5951	8.64471	8.80049	10.4881			16.7081	33.3128	18.8574	15.7971	20.7986	21.0975
LTR2C			7.60209	7.17024	8.02178	7.44621	11.8697	6.66734	9.93278	11.185	6.28945	9.9579	8.36685	8.27843	15.7159	14.3611	11.8573	14.3654			14.5657	21.5178	16.7493	17.7165	19.451	20.1084
LTR3			0.595573	1.31493	1.32224	1.21597	1.50919	1.04069	1.15873	1.00966	0	1.0192	0.873192	1.51108	1.09827	1.71859	1.61963	1.25562			1.18778	1.10038	1.12387	1.64332	1.4802	1.41121
LTR30			0.740365	0.59224	0.964455	1.0847	5.27037	0.876318	0.704943	1.26063	1.603	1.4558	0.936654	0.529542	0.51532	0.910632	0.931181	0.624719			3.64614	2.0155	1.44672	1.76257	1.47361	2.50479
LTR31			2.26018	3.9684	3.4067	4.03317	7.22044	1.94142	3.99391	6.80472	2.6686	5.64436	3.63176	6.49345	8.39703	8.62909	6.96129	7.28847			6.92307	10.978	8.44036	10.36	9.40215	9.61595
LTR32			4.11864	5.75793	6.61119	9.16371	18.3225	4.75806	8.64793	13.238	8.21794	13.2148	8.70177	13.0433	12.2316	17.3804	12.8638	13.2253			13.5195	17.3274	14.1301	18.074	17.5327	18.8504
LTR33			41.0425	54.7946	61.4283	75.6204	168.383	59.9427	101.633	132.464	86.3436	122.905	94.8077	133.323	130.336	165.032	137.79	158.112			152.34	224.163	205.005	240.346	229.158	241.303
LTR33A			4.3125	5.48477	7.93342	8.78857	20.2766	5.70994	15.0599	16.3029	10.4366	16.3761	11.106	17.425	14.8013	20.6202	15.9318	17.9458			17.6428	24.0304	21.2865	25.1972	24.1496	24.6443
LTR33A_			5.2768	7.53266	7.52897	9.28754	25.5006	5.52544	10.2941	12.8911	7.36114	11.4958	7.27793	31.6955	42.3468	45.9975	46.3451	52.1415			44.6776	50.8839	41.0392	41.3886	40.762	41.9909
LTR33B			3.20523	3.98279	5.68189	8.81417	18.2261	5.43905	10.5196	12.243	5.11246	10.5211	6.47621	17.0858	19.3094	21.1353	19.9739	21.7505			22.2263	36.548	31.6638	31.5104	33.9734	35.8134
LTR33C			5.07825	6.17213	6.22851	7.3112	14.0105	4.88294	8.18391	9.40041	5.3741	8.84739	6.78987	9.05018	9.75186	12.8617	11.5739	11.0431			10.104	13.6007	12.8422	18.4123	12.2822	13.9341
LTR34			1.29423	1.55623	1.82002	2.3853	5.44607	1.42017	2.56383	3.71103	1.79208	3.26413	2.2829	4.09075	4.74745	5.68064	3.94585	4.16256			4.77905	4.30192	8.65464	7.72519	6.18045	7.72677
LTR35			1.03865	2.06385	2.76892	1.90886	4.42404	1.81512	2.47559	4.00468	2.81244	3.64176	2.73292	2.90472	3.34051	3.40405	3.10857	2.97397			2.47013	5.83532	4.33336	5.41369	5.23436	4.87787
LTR35A			0	0	0.420005	0.477668	1.48626	0	0.45694	0.995233	0	0.727896	0.421128	2.76598	2.57668	2.44694	2.48149	2.28539			2.86177	2.67401	1.42282	2.30471	2.12749	2.30342
LTR35B			0.586314	0.784643	1.38415	1.18906	3.72386	0.989813	1.61629	2.27877	1.1291	1.89725	1.71095	1.85453	2.34943	2.40473	2.25293	2.31649			2.53878	3.46539	3.37449	3.66508	3.96164	4.85866
LTR36			1.13635	2.42153	2.75305	3.66522	10.4605	2.75218	4.06968	6.34303	2.73523	5.71267	4.22231	6.38982	6.89368	8.99507	7.17326	7.01679			7.0198	10.0519	8.8263	9.38897	10.4421	11.9694
LTR37-int			5.46806	4.56798	9.06557	10.1256	18.744	6.26717	9.97047	11.6275	6.26264	11.1683	6.95599	24.2902	28.6629	25.7192	22.4257	19.7584			16.3871	18.9473	19.9646	20.7276	20.3747	21.3454
LTR37A			5.37875	5.3881	8.63343	10.0518	18.0344	8.89207	13.2349	14.417	7.97213	12.2769	8.71326	16.3211	18.2057	23.9636	19.4864	18.4675			17.9411	24.9317	26.2131	26.1288	28.082	28.3875
LTR37B			4.22599	3.69333	6.59034	7.35502	14.6392	4.42937	9.20075	10.302	4.63137	9.20972	5.84911	30.7163	32.1858	33.8673	29.2661	25.0076			20.1117	27.6642	31.3463	31.6379	32.3627	35.287
LTR38			0.480845	0.595165	0.9489	1.1654	2.43507	0.547618	1.09269	1.45536	0.853433	1.1427	0.836858	2.22731	2.41359	3.99249	3.21492	3.83778			2.4967	2.39117	1.57725	1.78621	1.87074	1.59964
LTR38-int			0	0.489162	0	0.463792	1.07827	0	0	0.458986	0	0.5405	0	1.75589	1.00982	1.23791	0.82047	0.98681			0.790827	0.690182	0.974221	0.589135	0.716815	0.695843
LTR38A1			0.520305	0.791574	0.995567	1.28953	2.45216	1.17526	1.51591	2.02995	0.841245	1.85631	1.33514	2.24727	3.39218	3.27722	2.85417	2.24918			2.71731	4.38932	3.20748	3.84405	3.87672	4.51058
LTR38B			1.63574	0.992717	1.88224	2.52859	4.46081	2.93115	3.82889	5.56804	4.60836	4.74337	4.22952	1.79223	1.56782	2.90495	2.49703	2.90937			2.78925	5.12614	5.90265	6.24292	5.99238	7.44532
LTR38C			1.67449	2.83412	4.65116	3.25521	6.15606	3.07938	3.66871	4.42563	4.82145	5.40564	3.46362	3.23698	3.34728	4.07466	4.21838	4.4813			5.07421	9.17432	5.73164	6.63378	6.78032	7.3993
LTR39			3.8269	4.62669	7.07755	9.29938	22.6321	7.30544	14.3768	16.6802	11.6172	16.8781	11.1303	37.7584	28.0602	42.6045	41.7198	36.5429			35.516	40.5215	54.4428	58.5508	62.5083	61.0904
LTR39-int			0	0	0.668896	0.964474	1.95809	0.400025	0.478229	1.13065	0.502188	0.881758	0.716262	2.15791	2.70903	2.22763	2.46233	2.02537			1.36075	2.26389	1.03473	1.93479	1.88466	2.06266
LTR3A			1.1941	2.17409	2.95559	2.63975	6.64154	2.05365	4.0005	4.6025	1.31839	3.45601	2.74884	10.0262	11.3571	7.9506	7.4968	7.77826			10.3648	11.8654	6.74796	8.28422	8.60736	7.71327
LTR3B			0.520072	0.856343	0	0.838106	2.75313	0.625273	0.924199	1.36414	0.804071	1.30824	0.965423	0.608671	1.03221	0.941419	0.996029	1.2819			1.46193	2.72054	1.7689	1.91753	1.56771	2.44772
LTR3B_			0.535126	1.12185	1.13557	1.79658	3.6153	0.699397	1.47775	1.68781	0.730745	1.68007	1.16839	4.83896	4.6469	4.40457	3.68966	4.38665			2.93242	2.95444	2.43831	2.70124	2.98154	3.09871
LTR4			0	0	0.451116	0.459568	2.02748	0.442113	0.560649	1.31538	0.507312	1.1158	0.628837	1.07851	1.15421	1.22294	0.976266	0.669814			1.36417	1.86028	1.48007	1.93688	1.59411	1.75936
LTR40a			8.00541	7.70992	10.8423	13.8119	27.708	7.99443	16.4648	17.0497	8.87615	17.2844	10.7086	25.3541	22.1771	29.3477	22.8836	24.0182			21.186	28.0452	24.9975	26.7731	27.4046	26.742
LTR40A1			0.903812	0.70506	1.07335	1.77694	2.94601	1.42525	3.6543	3.37483	2.28379	3.26866	1.30641	4.04202	3.45609	4.45356	3.68345	3.82829			3.63319	5.15844	4.48903	5.46811	5.18002	4.67962
LTR40b			5.83287	7.37082	8.43121	9.63721	22.0841	6.76673	9.08455	11.9859	5.44863	11.4481	7.24327	20.2323	20.8643	23.717	22.087	20.5037			21.2222	23.1648	20.1286	22.5695	19.7366	21.3042
LTR40c			2.59172	3.66354	4.71339	6.5277	12.5207	4.22269	5.97027	8.3095	3.03821	8.28292	5.64558	17.0929	12.0345	16.2054	12.9276	12.5973			13.0223	14.6057	13.4218	13.7457	13.6344	15.2077
LTR41			6.8077	9.17529	12.1123	13.4141	29.7353	7.81517	18.2317	21.2097	9.42099	17.3846	11.3858	33.2178	34.4787	35.1067	30.2149	35.7662			26.2793	31.519	25.6602	33.6928	31.7762	33.9559
LTR41B			6.83673	7.80382	9.35926	11.9681	21.5131	8.05771	15.0152	21.8857	11.713	19.5323	13.7975	19.7931	18.7896	18.7806	15.9188	18.7004			20.2865	29.127	30.6794	40.6219	40.9857	39.0654
LTR41C			2.99428	3.76851	5.36673	6.28556	12.7051	4.19622	6.54386	8.39479	5.74112	9.38372	6.41605	20.01	23.1672	18.0086	15.8325	16.3707			19.62	25.5809	19.6455	22.254	20.9544	24.0829
LTR42			6.11673	7.23407	7.51342	8.81022	14.6352	6.08896	9.9123	11.6681	9.45809	11.3062	9.08659	21.841	22.717	36.943	30.1224	29.4552			19.8723	24.8757	23.2117	28.904	27.9321	27.6974
LTR43			4.14232	5.47028	8.66454	7.98027	17.1076	4.88516	8.45129	11.9378	5.45832	10.4771	8.00373	14.9093	15.9314	15.8712	15.1351	15.7797			15.449	18.484	16.9296	14.9315	20.015	20.007
LTR43-int			0.485802	0	0.730808	1.18525	3.18236	1.96445	0.805074	2.67303	1.32571	1.89417	1.85066	4.35112	2.61368	3.17083	2.90913	2.39189			3.36699	3.47462	3.63923	5.75445	4.0502	5.49765
LTR43B			0.453603	0.903104	1.04192	1.39578	2.90636	0.700366	1.73014	2.75116	1.21153	2.53131	1.59247	1.82411	1.61258	1.80858	1.88243	1.40048			1.46977	2.28919	1.71102	1.94485	2.23187	2.60491
LTR44			1.6276	1.41228	2.69114	2.78668	5.66149	1.52211	2.39963	2.56625	1.14963	2.60219	1.63339	6.63675	9.29828	8.41918	8.95588	6.99712			5.21016	6.03528	4.94801	6.0356	5.58369	5.86582
LTR45			0.586555	1.15305	1.07335	1.1484	2.63926	0.631232	1.05808	1.39591	1.06793	1.28876	1.07005	1.32593	1.36255	1.96409	1.58039	1.67603			1.37711	1.22093	1.20806	1.44942	1.60572	1.71281
LTR45B			1.90428	3.68981	3.37528	4.27515	10.2811	2.31356	4.15063	7.1617	2.19199	4.69666	3.27515	5.31738	6.18127	6.07403	4.48616	5.16993			5.27362	7.69043	6.55696	6.33101	7.39493	7.63006
LTR45C			2.68788	3.41933	4.17391	4.82735	9.9197	3.43876	6.27119	9.29216	5.55723	8.09979	5.9228	9.60199	7.53236	9.09478	8.20459	7.99879			7.02353	10.5394	10.5495	10.5836	10.2285	11.7139
LTR46			3.47378	5.48613	4.48316	5.66884	8.76427	2.74591	4.85752	5.22817	3.80126	5.5106	4.02482	8.89795	9.64237	11.5948	9.34627	9.24352			7.34492	7.37314	6.01311	8.46163	8.31214	9.7514
LTR46-int			1.81502	2.6401	3.1267	3.85947	11.6008	2.00253	3.51866	4.53779	4.1336	5.04374	4.06061	8.67763	10.2548	12.2407	7.9296	8.50137			8.12603	11.1962	6.70469	11.6542	10.5241	13.666
LTR47A			3.73871	4.08683	6.23785	7.45837	11.7271	4.54047	5.60117	8.54186	3.37192	7.14772	5.16708	13.5333	18.6794	14.7642	12.6944	15.3779			17.2504	26.8488	20.0386	24.078	23.8916	25.8636
LTR47A2			2.68689	2.58361	2.3178	2.43698	4.988	1.43778	3.53279	4.80306	1.70416	3.34174	2.18995	6.1468	7.71533	6.94517	5.65993	5.77856			5.12931	7.24463	5.75005	8.44407	7.86948	7.5362
LTR47B			0	0	0	0	0.610089	0	0	0.523419	0	0	0	0.697334	1.05726	0.826094	0.660468	1.0645			0.858279	0.608568	0.522431	0.92181	0.690004	0.723268
LTR47B2			5.13153	5.26556	4.44863	5.99746	7.51596	4.21223	5.62738	6.6374	4.54249	8.26963	6.31605	3.1917	4.69182	4.91794	4.37743	5.00388			5.49885	7.08967	7.18025	5.84349	5.50904	7.05719
LTR47B3			0	0.903126	1.44668	1.16327	3.7081	1.82795	2.02876	3.91686	1.24597	3.0666	2.25505	1.5009	3.18455	2.71051	2.18567	2.46979			2.3981	7.04728	5.49951	3.78134	5.22926	5.6734
LTR47B4			0.825314	1.19168	1.35335	1.47323	3.92915	1.15316	3.92242	6.76053	2.49305	5.74489	3.50581	4.13576	4.52589	4.04664	4.0447	4.36319			5.48839	16.0886	17.1962	19.005	17.6993	22.5962
LTR48			5.01069	4.95262	7.88675	7.89024	15.7593	5.18517	10.7676	19.8256	8.95716	16.2135	10.2292	11.0332	11.6562	16.0628	12.7841	11.0755			11.3011	22.7124	29.1137	33.9804	30.0194	33.1098
LTR48B			12.2216	13.5871	19.3047	22.1656	25.5216	15.1363	19.1901	22.7925	13.7001	22.056	16.3945	15.1435	17.6846	28.1149	24.1235	32.9623			27.7718	44.0894	35.8423	37.4497	35.6683	39.1757
LTR49			6.31618	6.06211	7.55231	8.57452	16.0349	4.53103	12.5223	15.1021	7.47452	13.8955	10.6065	24.7878	29.4708	31.5928	29.4166	30.0656			24.2196	46.8721	40.9801	62.5553	52.9995	51.827
LTR49-int			9.95963	9.59688	13.829	18.2701	32.0575	9.41446	20.3373	24.5832	13.1347	25.9736	17.6943	29.8806	33.832	42.1199	36.9476	33.8895			28.3218	39.9998	41.9884	48.55	40.8473	46.3454
LTR5			0	0	0.452672	0	0.613276	0.625102	0	0.812966	0.419665	0.660542	0.509206	0	0	0	0	0			0	0	0	0	0	0
LTR5_Hs			36.6371	50.524	50.6519	54.0574	82.1275	51.8749	63.0402	84.0624	41.6167	69.0406	62.119	63.3752	92.0971	86.3991	74.9606	82.6179			74.6562	123.174	105.589	96.1879	107.224	115.653
LTR50			11.8843	15.8518	20.2691	24.093	42.8907	16.6459	27.0464	29.9698	18.4932	26.9409	21.1178	42.7767	49.7825	56.8827	52.2263	53.1698			42.5034	54.1315	45.7125	53.6675	56.0272	58.1445
LTR51			2.22275	2.22777	3.87338	4.7545	8.09644	2.95057	3.2136	5.42913	2.45495	5.36949	3.53612	6.04995	8.81949	7.76262	7.10875	6.7469			7.73832	8.58434	6.36628	7.65027	7.69232	8.07881
LTR52			3.97683	4.21222	5.84895	7.27341	12.0137	3.55444	6.11059	7.80281	4.73228	7.54417	5.25906	15.0419	15.1537	15.7009	15.0573	14.8038			15.1944	18.7312	13.3019	16.9478	17.1442	18.6981
LTR52-int			3.73018	3.04128	3.53115	4.24405	7.40323	2.68867	4.04825	6.27966	5.924	6.69097	5.28324	5.249	3.55798	5.10701	5.04003	3.42429			3.52315	3.9037	3.62998	3.69614	3.62516	3.77942
LTR53			5.53481	5.92712	5.45975	8.23502	17.3031	4.59748	9.34056	12.595	5.52351	11.701	7.35792	12.8585	15.2997	15.3503	13.3594	13.7759			11.5889	18.2135	13.7894	16.0321	15.5585	16.9028
LTR53-int			10.7618	8.09963	8.63343	9.81876	10.3169	6.87273	12.6435	11.4868	15.226	13.7469	12.2092	10.8583	11.4403	18.0537	15.9699	13.9399			9.19424	11.0724	17.4588	17.1704	15.518	15.5528
LTR53B			0.539649	0.617038	0.824454	2.14508	3.74299	0.502257	1.74513	2.2737	1.5769	1.88768	1.31678	2.35586	2.42173	2.91226	2.16065	3.58351			2.42439	2.85862	3.03659	3.83802	3.41021	3.95368
LTR54			4.8173	5.16031	6.68896	8.33457	16.9153	5.22795	12.5558	16.1873	6.97237	14.7089	9.09225	15.1329	19.075	22.4354	17.9575	18.9809			18.1505	34.5517	35.9577	39.7451	35.4627	36.1935
LTR54B			2.54385	2.94914	3.92004	4.54901	8.84545	2.84301	6.31777	8.43436	4.37551	7.15497	4.58285	9.8283	10.223	12.254	10.1964	9.36793			10.149	16.9968	14.228	20.4014	14.4756	17.6545
LTR55			1.34851	1.87287	3.37559	3.64729	8.55933	2.07856	5.50256	9.29319	3.42366	7.43753	4.07412	6.3193	6.74487	9.09424	7.18474	8.42644			10.6188	16.9297	18.2933	24.1926	23.9979	23.6081
LTR56			5.30873	5.93987	7.99876	8.67086	20.2457	5.20267	11.3879	13.3058	6.80873	11.3382	7.91571	16.2326	17.4906	20.3102	18.0282	16.2666			14.4324	20.0796	18.834	21.4065	20.2943	22.1473
LTR57			0.737032	1.37012	1.69557	2.14565	4.45751	1.13955	2.07772	3.41584	1.4899	2.72458	1.62261	9.13223	10.046	8.73529	7.97156	7.64777			7.76047	10.1504	11.1079	11.9053	11.3968	11.4441
LTR57-int			20.1177	9.58796	11.113	13.9595	6.88651	3.84909	7.87894	4.67495	6.85717	7.43875	7.62716	17.8213	15.2925	24.8395	25.3564	14.3741			4.53083	4.07996	7.20021	8.94123	9.40285	8.88127
LTR58			0	0	0	0.401326	1.02503	0	0	0	0	0	0	0.530502	0.899838	1.06419	0.955778	0.718616			0.575406	0.813041	0.567116	0.862261	1.14912	1.05732
LTR59			0	0	0	0.495668	1.22361	0	0.805301	1.13254	0	0.82687	0.444602	0.774387	1.00599	0.893943	0.872075	0.752577			0.905738	2.01918	1.66282	1.95911	1.65564	1.59123
LTR5A			37.7528	48.0975	49.4196	58.6115	62.3864	39.7618	54.0852	50.884	35.6688	49.2161	45.6812	35.9281	72.6364	65.7303	69.8006	69.3766			59.3814	85.7669	64.7166	71.8676	79.5752	73.7557
LTR5B			19.0057	31.4475	38.2963	35.093	67.6387	31.4362	43.5445	56.5601	34.2828	50.1791	47.157	55.1968	82.9877	69.2422	62.6823	78.0072			78.7782	123.919	101.162	102.973	109.711	117.781
LTR60			0	0	0	0.653654	2.44427	0	0.52845	0.738913	0	0.902621	0	1.63897	1.54873	1.25199	1.24662	1.08823			1.08291	1.19353	0.766247	1.01494	0.890259	0.915115
LTR60B			1.05544	2.20769	2.03749	2.62113	4.45384	1.1555	2.54218	2.83848	1.97582	3.18798	2.37475	4.53954	4.3185	6.38071	5.68035	6.39164			4.52703	8.18073	9.58699	12.1607	11.7258	12.4736
LTR61			4.54634	4.27063	5.95753	3.99122	8.27943	4.5206	6.13086	6.4431	3.5713	7.19509	5.86358	7.29562	11.3213	11.1405	10.0549	9.24207			8.17042	13.2576	12.7411	13.2624	12.9586	15.9984
LTR62			3.22707	4.36983	6.26896	7.85851	12.9232	8.51199	15.8372	20.3404	11.3761	15.4884	13.7139	8.87663	10.3523	10.2204	8.14869	10.6873			11.9497	34.9353	32.0313	26.4306	31.6198	29.3643
LTR64			3.99192	4.17223	4.02893	5.17258	6.56005	2.78768	3.94416	4.71012	3.02156	5.06995	3.91784	7.34326	8.83453	9.99423	8.39234	7.94135			7.63115	8.86107	7.94422	10.3301	9.97915	9.90962
LTR65			2.53657	3.01297	4.34036	3.85551	11.8546	3.87633	7.64539	11.3932	4.65076	8.85893	6.86117	10.5758	9.64456	10.7098	9.46738	8.64152			10.4865	13.9333	12.3084	15.0185	14.4798	14.9208
LTR66			1.85266	1.73692	2.30225	2.9714	4.70611	2.24325	1.69335	2.37614	1.17949	1.77336	1.88452	3.66677	6.41966	6.78959	7.05613	7.57359			6.04656	4.98164	5.29745	4.54417	5.93149	5.8819
LTR67B			18.6028	23.391	28.7781	32.8596	48.5936	20.7769	38.9223	39.9482	22.1466	41.9318	30.5301	55.3845	58.4935	65.2933	55.8519	59.7574			60.5066	84.6458	78.063	78.1304	81.0054	80.4992
LTR68			3.53435	2.13896	3.25115	4.12739	3.82423	1.87183	2.95888	3.423	1.56703	3.88127	3.33713	3.70988	4.25587	5.54582	5.19576	5.20281			4.10052	4.62784	5.27422	6.86423	6.06116	6.99357
LTR69			0	0.610343	0.451116	0.65093	1.96997	0.641667	0.743962	1.12563	0	0.730103	0.480833	1.39525	0.841441	1.47382	0.927978	0.719901			0.812716	1.41978	0.982573	1.11033	1.00232	1.1651
LTR6A			8.50184	7.93217	12.0815	12.3537	24.7695	14.6201	14.6986	21.0801	15.603	17.0635	16.7543	30.479	32.7206	39.114	33.2616	45.5178			56.8757	55.4469	45.7406	41.4637	45.0948	49.7553
LTR6B			1.462	1.2812	1.53846	2.19746	8.70026	2.37482	2.61245	4.9977	3.02408	3.47746	2.5493	3.36441	4.34297	4.22615	3.56167	4.56907			6.2986	11.0312	6.61557	7.55634	7.17699	8.18471
LTR7			3.35275	4.50959	5.48091	6.86663	18.9697	6.02553	8.6474	13.4003	7.99666	8.97146	7.61132	14.0021	15.5537	17.1938	13.8738	16.9235			21.0159	29.909	29.4855	25.265	26.0228	29.8531
LTR70			7.40223	6.11424	8.75788	8.91892	21.5074	5.26845	7.17226	9.63655	3.66649	8.22126	4.15094	27.8138	27.0796	16.4432	11.8973	13.9491			15.3405	20.0397	14.414	12.5096	11.8735	14.5352
LTR71A			1.44031	2.89513	2.69114	2.77729	3.74344	2.03394	3.20873	3.36781	1.379	3.17225	2.23785	1.75446	1.45726	1.74248	1.14661	1.7194			1.34531	2.27965	2.11855	2.29278	2.12086	2.39718
LTR71B			2.05825	4.56043	4.33974	4.67118	8.90465	2.87052	3.91882	4.71041	3.15243	4.52949	3.11108	4.89803	7.25139	8.99193	6.68943	8.50987			8.5897	11.9713	8.6384	8.1427	8.73538	11.3138
LTR72			1.99876	3.17872	3.68671	4.23107	8.07526	4.54144	5.88857	8.6637	5.6192	9.87976	7.92271	4.60155	5.14542	5.57655	5.0043	5.72457			6.61138	10.1248	10.2684	11.3723	13.3256	13.5663
LTR72B			0	0	0.451116	1.0728	1.56472	2.3462	4.66161	5.2369	3.72866	5.58109	4.73245	2.55167	1.58798	2.71287	3.03718	2.04587			1.4676	3.78966	6.49119	7.14775	5.59244	5.64041
LTR73			0.812579	1.35968	2.84079	2.25998	5.7597	2.07662	3.16102	5.19405	1.46368	3.72421	2.08774	6.7402	8.20174	8.85974	8.10204	8.3077			9.38634	13.2324	11.1943	12.8252	12.7469	13.5564
LTR75			3.44981	5.4011	6.06673	6.33788	9.82484	3.03997	4.7799	6.46238	4.21293	6.64513	4.67274	7.50313	9.90183	10.1926	8.87782	9.99595			10.3835	11.3031	8.18422	10.5623	9.11121	10.6431
LTR75_1			0.9856	1.32401	1.29113	1.67709	3.04125	2.61357	7.49301	11.333	14.0751	13.1621	13.2201	2.07465	1.98838	2.81109	2.76094	3.05983			3.09264	7.65732	16.6881	16.4226	15.1959	21.8259
LTR75B			2.4616	2.32408	1.68002	3.21096	2.40942	1.11498	1.68976	2.54421	1.22566	2.99212	2.45014	1.69931	2.92028	4.56915	3.44188	3.95899			2.86737	3.89406	4.07633	4.31298	4.15461	4.95435
LTR76			21.0504	19.5752	20.8913	18.6847	23.3393	15.0553	15.1615	18.405	12.2691	21.5558	16.3244	15.5194	18.1838	21.1142	21.2552	18.761			20.5467	19.505	17.9843	15.5692	17.2461	17.3399
LTR77			5.25705	5.39751	2.28669	2.71789	3.11827	1.83546	2.50376	2.60246	1.73525	2.75777	2.42273	1.21784	1.36138	1.73871	1.3445	2.19715			1.94266	3.26361	2.63698	2.47014	1.78661	1.89071
LTR78			12.8749	16.1844	20.3936	29.9096	63.2049	18.1885	37.0662	42.472	23.871	40.8206	28.4762	89.9799	108.437	126.729	128.003	125.656			113.079	126.638	121.962	137.433	137.38	137.111
LTR78B			6.04136	7.09042	10.5773	13.6483	33.2376	8.20487	16.2048	20.485	11.771	20.3337	12.6424	25.3279	21.1402	31.1919	24.8128	26.2202			23.1238	37.5992	34.1905	44.9378	41.296	39.0161
LTR79			16.1273	18.9516	23.318	31.0647	55.68	29.2096	45.3803	50.2035	30.3167	49.4552	39.4114	57.9941	54.6703	69.0917	57.4739	58.3116			57.0421	73.8684	76.7887	75.4451	78.1672	77.8683
LTR7B			6.31918	9.8781	14.0985	11.7589	27.909	9.65235	15.1127	26.4605	18.7728	19.2563	11.9011	13.0088	17.0319	16.3101	15.0753	17.3737			26.3157	48.6222	30.538	32.5451	34.3531	40.9608
LTR7C			3.00789	5.05503	5.27339	6.76652	17.2118	5.36923	8.00166	12.5404	10.2863	8.8437	7.26615	11.1827	17.5087	15.8844	14.5329	18.5358			22.3216	34.3355	19.3937	26.2977	30.0674	35.0277
LTR7Y			0	0.638892	0.642452	0.718214	1.76991	0.616496	0.973537	1.74001	0.794833	1.0558	0.8118	0.869426	1.07427	0.964816	0.990139	1.47104			1.60997	2.23172	1.69007	1.85088	1.96729	2.18006
LTR8			17.31	24.7784	29.867	39.5031	109.515	25.9183	37.4949	56.0475	32.5861	49.3168	34.5478	59.7482	74.8304	84.6411	65.9028	68.93			70.7983	83.7952	72.6229	96.7373	86.5486	101.179
LTR80A			0.915916	0.873139	1.91335	2.19989	3.0057	0.535227	1.34768	1.91256	0.958884	1.49771	0.606353	3.1746	3.31637	4.00386	2.95469	3.47017			2.24712	2.69299	2.46216	4.09013	4.14552	3.11952
LTR80B			0.618491	0.765817	2.16194	2.57147	4.9273	1.14614	1.90572	2.19523	1.07947	1.62104	1.04296	4.69494	7.18613	6.74855	5.62273	4.69242			4.53565	4.19185	3.65418	4.24419	4.40315	4.10039
LTR81			0.853458	0.728114	0.886677	1.2665	2.41968	0.60187	0.794603	0.840506	0.506828	0.864423	0.474351	2.30941	2.6911	2.85649	3.73215	2.62583			3.75699	2.58126	1.01754	1.28871	1.18917	1.41819
LTR81A			2.33883	2.68352	4.15338	6.23252	10.9886	3.1916	3.49285	5.54963	2.48451	4.44416	2.97426	4.72149	5.11571	8.77528	6.28619	7.19552			6.8422	9.15041	6.22332	8.41936	7.52747	8.87963
LTR81AB			0	0.507943	0.668896	0.864156	1.59445	0	0.815324	0.760028	0.566696	0.627088	0	1.58401	1.63533	1.83942	1.69544	1.42521			1.16569	1.55247	1.34225	1.33683	1.63642	1.49228
LTR81B			12.8797	14.9779	27.8914	16.1139	30.6509	18.9679	19.5216	22.6573	16.5064	15.3159	11.4765	22.3556	27.7007	29.9523	31.2675	37.8819			38.3459	37.4142	32.7561	31.088	27.443	26.0351
LTR81C			1.50447	1.21255	1.94447	2.85933	5.25827	1.74805	3.14733	2.96894	1.84871	3.16164	2.08228	3.33969	4.29461	4.59829	3.84826	4.68626			4.37833	6.07349	4.79528	6.71447	6.35025	5.84032
LTR82A			5.05969	3.56429	5.42895	8.10116	12.8692	3.75173	6.931	6.47849	6.27289	8.55589	6.58312	12.1555	11.5255	14.1667	12.3564	11.1864			10.5832	11.5274	11.7578	14.9978	13.0475	15.7665
LTR82B			5.0951	4.39259	7.57564	10.775	17.584	4.89826	13.2858	12.5722	9.07621	12.546	9.41746	16.32	10.1338	14.2079	11.4889	12.5426			12.2647	14.3214	14.8133	21.3678	20.9887	21.1569
LTR83			2.88773	2.41494	4.83783	5.32104	7.31663	2.93721	4.97291	5.74388	3.55273	6.4303	4.44064	7.5579	7.34052	9.49317	8.13515	8.64879			5.93405	7.94033	9.51593	9.98193	9.11985	10.1214
LTR84a			5.79364	4.6833	5.61562	8.42068	12.3495	4.66239	8.72685	8.83675	7.18981	9.81329	7.50627	12.069	13.1273	16.9072	14.965	13.4977			13.591	15.1339	18.2803	17.1117	16.6551	16.9381
LTR84b			3.70466	3.61291	6.05118	8.28136	16.1778	5.41193	10.2011	12.4225	8.4912	12.7031	9.57189	14.5867	12.8727	19.1066	14.7858	15.265			15.3937	20.7923	20.3873	23.9846	20.7637	22.6718
LTR85a			3.94846	4.6642	6.20674	8.51727	15.5018	5.28125	11.9889	12.0327	8.29598	13.3831	9.01565	14.7759	12.6196	22.5336	16.673	15.9019			13.4042	18.6056	21.0984	26.6889	25.4392	23.8302
LTR85b			2.48142	3.64932	4.71836	6.37883	13.2004	3.85524	6.07224	7.43085	3.3626	6.96512	4.83532	9.27511	9.97308	13.5006	10.892	11.8578			10.3541	13.116	13.3886	14.1049	14.5139	15.2805
LTR85c			1.81802	1.98137	3.78004	4.05404	9.88788	2.50374	5.22085	5.8839	3.1904	5.23001	3.70465	8.2481	8.61897	11.9019	10.7681	9.42519			8.52119	12.783	9.5773	12.1563	13.3054	13.472
LTR86A1			1.82996	2.14162	3.74893	4.94382	7.76254	2.48759	6.50483	6.47973	3.56528	6.44194	3.54541	14.8783	12.0399	18.4422	15.7113	13.1643			10.6728	13.5125	11.1336	17.7432	15.916	14.7298
LTR86A2			0.884475	0.990016	2.12025	2.47865	4.29663	2.15328	3.79153	5.49578	2.0074	4.33427	2.45171	5.61277	6.27297	5.82554	5.30756	5.11837			5.7869	13.1945	12.7072	10.0604	12.8778	12.3705
LTR86B1			1.03044	1.37091	2.75336	2.72953	5.37161	0.991108	1.28839	2.54775	1.07521	2.63715	1.44665	7.57295	6.54385	9.15882	8.09864	12.9078			8.16034	5.8909	4.85711	5.61767	6.37763	5.88214
LTR86B2			0.617045	0.618202	1.29113	1.75712	2.05729	0.975003	1.65383	2.0196	1.1975	2.19706	0.983596	2.42096	1.87277	2.60571	1.85296	2.26135			2.35576	2.98943	2.67047	2.47825	2.71252	2.87886
LTR86C			0.535542	0.573076	2.06891	2.24415	4.09495	1.91274	1.35517	2.08828	0.922359	1.91541	1.14029	3.2265	2.82316	3.47033	2.94369	3.61341			4.13786	4.88736	2.46369	3.46915	3.71276	3.66661
LTR87			7.95544	7.5344	12.8795	14.2618	22.1925	9.22779	16.5371	19.9438	9.69125	16.5672	12.8673	28.739	26.5497	29.5594	28.4361	26.913			20.9808	22.731	23.5962	29.4723	28.4487	27.7623
LTR88a			2.52227	4.26413	4.46449	5.70172	9.63612	4.46248	6.99934	7.41485	5.04458	6.55308	5.31465	7.65604	9.45484	9.40182	7.84693	9.0768			9.13279	15.4889	10.3629	13.5937	14.513	11.624
LTR88b			2.59354	3.8091	4.60947	6.54673	12.8516	2.82905	5.53557	7.15649	3.78431	7.6148	4.66181	11.5683	12.6994	13.3815	11.339	11.0803			9.8077	10.014	9.44298	13.2808	13.5045	13.38
LTR88c			2.43553	2.58208	4.09116	4.16754	8.16652	2.86561	3.55014	4.28654	3.21354	4.13674	3.35778	6.83143	8.00994	10.6477	8.18398	9.85739			8.50382	9.64842	9.3726	9.30407	9.2627	9.10398
LTR89			4.74859	5.67138	7.11426	8.09557	13.3818	3.90794	9.07947	10.5249	4.92597	8.23658	6.42689	23.5841	24.825	25.3646	21.815	21.9573			21.1312	28.1878	22.9423	28.1872	27.1691	26.7648
LTR89B			2.31131	2.31502	4.29867	4.13677	5.26807	2.13068	5.18633	5.56772	3.37213	5.83582	3.2286	10.7986	8.87889	12.2852	11.0369	10.3814			8.20579	11.3627	13.6277	17.2939	14.0188	14.9624
LTR8A			13.1976	14.3278	15.3065	18.7208	45.7927	14.8203	26.4793	29.674	18.7989	25.2606	20.1584	34.0727	35.7964	38.0122	33.5209	38.5226			37.0927	54.0721	40.6743	58.8099	54.8024	54.5013
LTR8B			16.6035	18.1781	30.5359	25.8436	45.2789	14.5498	24.9773	25.5676	29.1517	26.8915	22.5683	32.1808	29.9718	36.0816	32.8487	29.1198			28.304	32.7624	27.3532	39.6749	35.2175	39.0064
LTR9			1.50235	2.47094	3.48448	3.86012	10.942	1.38615	2.53716	4.71985	2.43898	4.30104	2.38711	11.2467	15.0493	15.7206	14.8438	13.6054			15.7479	26.498	26.2909	22.5651	24.5556	25.1288
LTR90A			1.00286	0.950508	2.06891	2.13457	3.44455	1.20253	2.80421	3.17746	1.83044	3.14256	1.7601	7.14682	6.62322	6.18277	5.83645	4.93701			3.9124	5.49629	4.5555	5.53649	5.35682	5.20517
LTR90B			1.37049	0.746225	1.94447	1.83371	3.27775	0.909216	1.41574	1.86603	0.800279	1.94214	1.01878	7.19827	9.54814	10.9152	10.8631	10.7811			8.95246	11.4738	20.4859	12.6401	16.2891	14.3141
LTR91			2.49063	3.5999	3.59337	6.38922	8.70251	3.94091	6.10429	6.19429	3.16375	4.99501	3.4174	11.1042	8.33541	13.0214	9.15711	9.91258			9.20069	9.82623	10.0993	10.8712	10.1262	10.3917
LTR91A			5.85863	7.48585	14.2802	12.1105	20.2961	7.40749	9.15992	10.8165	5.05144	9.38278	6.85928	18.164	26.8394	24.4284	21.2831	21.93			17.4561	18.3078	16.6457	19.12	18.9515	19.2036
LTR9A1			2.74563	3.0055	3.6556	5.30959	15.1595	3.8593	7.70434	13.4685	7.16187	12.5394	9.53366	7.48844	8.70136	12.1177	11.9993	13.1648			16.586	22.5436	21.2373	32.606	30.0945	31.1383
LTR9B			1.7831	3.05075	5.64673	5.50452	14.715	4.13451	7.60106	8.27513	4.46766	6.65079	4.0318	8.8085	8.09722	9.56886	8.19768	9.57126			10.5732	12.5402	10.3802	12.3111	12.4381	12.0518
LTR9C			0	0	0	0.457887	1.47402	1.29828	4.31798	4.38302	2.67197	4.06306	2.41771	1.2864	0.942922	1.42941	0.921037	0.896164			1.39982	4.26307	7.49049	11.3298	8.22201	7.638
LTR9D			5.79338	6.07539	7.76231	8.67631	17.71	5.33156	10.1633	10.9733	8.57627	10.9705	7.90873	13.0052	14.7196	16.9961	13.9271	16.0791			15.9694	24.6247	21.7812	24.5951	22.911	23.0045
MADE1			7.66472	4.52608	10.0646	12.8094	19.3612	7.22011	13.5567	16.4808	8.88859	14.86	10.6638	46.2502	42.2046	50.9749	46.425	37.985			29.701	36.9422	42.8871	48.7028	43.6103	43.6189
MADE2			5.12555	3.75518	8.57121	8.54319	12.3286	5.2297	12.6138	12.4232	5.56412	10.8237	8.39245	60.5145	61.7725	64.7671	56.1251	44.4592			34.72	48.748	57.8549	56.3376	60.5332	63.2803
Mam_R4			2.22176	1.64335	4.16894	4.74269	5.56894	2.73102	4.30216	5.93149	2.7374	5.91308	3.65824	47.7474	64.4469	56.3885	58.6458	41.4457			38.6037	39.25	52.5352	41.7953	49.1281	50.4816
MamGyp-int			5.84229	6.57603	6.67341	5.72382	8.14774	3.6736	6.78908	4.78879	5.32382	6.95854	6.57581	8.90934	8.2514	11.9821	14.0506	12.7174			7.05779	6.8735	5.21406	8.52989	7.69915	7.81902
MamGypLTR1a			1.72371	1.78205	2.15602	3.73965	11.7163	3.21868	9.62177	8.03009	5.21109	8.59315	6.5307	5.89238	5.38963	9.03017	9.00681	8.1382			8.68002	15.7997	16.7236	19.3526	16.5042	15.7234
MamGypLTR1b			3.5716	5.25424	5.62153	7.82823	14.6985	5.28599	7.0066	9.06164	5.09693	7.56417	6.0565	48.6051	41.2052	44.3684	48.5076	49.0824			39.7725	31.6418	25.0466	31.3535	28.7637	32.1928
MamGypLTR1c			1.93989	2.45155	3.34448	4.32632	10.5752	2.85273	5.53615	7.55623	4.38757	6.91159	5.52442	7.86842	7.91516	9.99506	7.53471	9.24921			7.62128	12.2428	11.4498	15.0685	13.4824	12.9551
MamGypLTR1d			2.44119	3.31251	2.75336	5.36184	9.61467	4.25713	6.10277	6.28824	5.13121	7.16713	5.13381	7.45612	6.18726	7.52383	7.19902	6.40351			7.68235	9.15063	11.1744	10.761	9.88019	9.4665
MamGypLTR2b			2.10712	1.9386	4.93117	4.68922	6.63125	3.25317	3.51947	3.88418	2.99486	4.47634	3.46742	4.4875	4.82251	5.98023	5.47265	5.92279			5.38948	9.08429	7.77217	8.3297	7.80831	7.3306
MamGypLTR2c			2.01842	2.34101	2.8467	5.31595	9.23242	3.39401	6.13958	5.76673	3.59316	4.84005	3.395	5.07586	6.35007	12.5485	9.89151	10.8153			10.8393	11.0539	8.50779	10.184	8.68561	9.66087
MamGypLTR3			2.49144	2.74858	3.78004	4.05484	6.29097	2.21065	3.0856	4.64215	2.23269	3.9147	2.67391	10.451	11.0162	13.6824	11.147	13.4663			11.309	12.9165	9.96669	10.9427	10.9969	11.2555
MamGypLTR3a			3.95203	4.83673	5.24166	7.27083	15.4326	4.61434	9.89079	9.53181	7.50775	10.2723	7.64146	9.97977	9.58912	15.1525	12.5565	14.1697			14.2962	15.1985	15.1651	19.0816	15.1419	16.004
MamGypLTR4			1.2474	1.54799	2.3178	2.3137	5.83076	2.63169	4.54585	3.24007	2.70965	2.67118	1.76194	2.93465	4.05966	5.60333	5.16402	4.75078			5.49193	9.57547	8.52947	7.28367	6.76076	7.33777
MamGypsy2-I			3.37986	3.39663	6.30007	9.07921	15.7673	4.2218	7.35275	9.07389	3.7801	8.69409	4.28358	15.7608	14.243	20.526	15.9247	14.2437			11.9873	15.5396	12.7765	16.2211	15.6282	14.6032
MamGypsy2-LTR			0.654877	0.596381	1.91335	1.94775	3.22619	0.737045	2.3053	2.47819	1.40713	2.13875	1.19761	10.5864	8.43403	8.3812	6.81585	8.86745			9.85249	12.2236	11.1413	12.392	11.6519	12.8963
MamRep1151			3.25031	2.73492	4.83783	5.27018	8.66185	4.75403	8.53295	9.92084	4.52956	7.96415	5.28991	21.5481	38.6282	32.2171	29.2067	31.0245			39.2799	56.4876	51.2025	43.6478	44.6208	45.3745
MamRep137			13.1182	12.2077	20.2063	22.5988	37.4202	12.6213	25.481	32.8275	15.9759	30.1086	20.2612	94.3775	85.581	104.866	88.6433	82.7458			68.2781	91.7297	101.947	108.048	105.27	103.194
MamRep1527			4.09541	5.49182	7.04675	10.1822	12.1997	4.99257	7.35959	7.90022	3.95679	7.03604	3.71263	14.0889	17.8487	24.1089	19.7083	25.1358			15.7083	23.2107	13.1422	18.9431	22.4355	18.7257
MamRep1879			3.47033	5.30139	5.05561	6.2348	15.0875	4.72196	8.4722	11.0994	6.76553	10.1152	6.07651	14.7933	12.5709	16.5795	12.6473	14.012			11.8145	15.2856	14.9277	17.128	16.4278	16.8381
MamRep1894			1.71941	1.88926	2.13113	3.31637	4.44074	1.11274	2.90424	3.89589	2.37725	3.65719	2.19647	10.3858	9.70537	10.3507	9.086	8.11796			7.62428	6.09864	6.3145	7.36838	7.54417	7.43137
MamRep38			7.31004	9.85507	14.5791	15.4401	37.4016	11.2473	22.6266	28.2621	13.6429	24.4066	17.0992	35.5039	38.4515	41.8323	38.6031	38.5099			40.489	54.6752	50.8943	55.7576	57.7384	61.5165
MamRep4096			2.68586	2.5625	4.49561	4.7874	10.2867	2.86391	5.57622	7.49127	2.94504	6.31837	4.14226	11.3468	13.919	15.8643	13.9312	13.5494			16.8684	22.3198	18.6914	17.5765	18.2813	20.0234
MamRep434			11.8035	6.06636	16.2091	16.9033	21.9148	9.55081	20.2667	18.5787	9.21689	19.5007	12.0939	46.038	44.5233	54.1073	46.6372	38.518			31.2046	38.7002	46.857	50.6774	48.2582	46.7258
MamRep488			2.57077	3.94524	3.50004	3.58927	5.95786	2.37687	5.10671	5.75743	3.59988	4.7257	3.89629	6.36131	6.76165	9.71403	8.09242	8.0594			7.46588	11.551	8.38978	10.0022	10.7115	11.9113
MamRep605			18.2584	16.5025	25.2781	27.7312	54.3021	20.7813	42.1852	51.0753	25.0086	43.1039	29.2123	71.9837	75.4947	90.2891	79.0491	74.5047			68.0141	99.6786	109.499	113.204	117.259	117.092
MamRep605b			10.5552	12.1807	16.7224	18.6652	33.2393	10.6897	21.5745	30.2134	11.8151	27.5442	18.4842	59.5221	53.8007	63.274	51.7393	47.0237			49.481	76.1812	76.2141	84.5651	81.5786	81.1965
MamRTE1			39.7268	36.8061	53.2516	64.4169	95.2258	36.6759	66.0624	85.2874	40.6031	78.4832	50.7697	367.788	329.209	389.358	356.62	337.44			302.874	336.283	349.876	386.342	373.009	376.979
MamRTE2			0	0	0.420005	0.54303	0	0.638759	0.755975	0.801935	0	0.848354	0.517567	0.718507	0.673935	0.86252	0.535145	0			0.502676	1.3938	1.72882	1.17939	1.20122	1.32582
MamSINE1			22.034	23.2225	33.3359	41.6258	66.2059	28.2968	61.7534	63.7942	38.9609	68.1641	45.5678	167.063	148.636	200.825	185.223	168.526			155.57	197.571	210.984	223.377	218.579	210.542
MamTip1			1.74383	1.78844	3.34448	3.38847	8.49091	2.31624	5.57343	5.76433	2.67703	4.24415	3.03946	14.0895	18.9831	20.2508	19.5014	18.7176			24.7718	31.6688	28.2588	25.7136	24.6396	28.837
MamTip1b			1.37871	1.60659	2.19336	2.74889	3.66888	1.66956	2.7251	3.13633	2.09906	3.49986	2.04475	4.83577	5.18789	6.19471	5.72926	4.81093			4.33534	6.9268	6.34923	6.9351	6.90158	7.1368
MamTip2			22.4009	18.7347	20.7047	28.5802	44.6604	19.9754	48.1733	45.3488	25.9641	41.5415	29.6018	70.0268	67.9965	87.0008	71.7566	66.8951			62.3861	102.319	107.493	114.146	109.575	104.013
MamTip2b			45.2622	37.0879	48.7616	55.0076	80.8571	33.7149	59.6979	58.9675	38.3292	57.1552	42.022	113.242	117.453	154.046	147.739	130.685			154.787	179.788	167.044	181.745	178.963	174.823
MamTip3			1.88947	2.73783	3.59337	4.0164	9.1471	2.20954	5.01145	5.89304	3.25468	5.93679	3.39063	6.69413	7.15647	9.29905	6.90511	8.71665			7.62206	8.61696	8.31593	9.46723	9.00313	9.06996
MamTip3B			1.35269	1.90571	1.85113	2.56514	5.81973	1.40536	2.55301	3.40398	2.33506	2.95428	2.22244	4.68902	5.20739	6.03146	5.47221	4.43057			4.48319	5.06492	5.25539	5.08922	5.76002	5.94365
MARE10			0	0	0.451116	0.687181	1.24712	0.824023	0.60884	0.842943	0.541251	1.29828	0.760297	19.784	6.5226	12.844	9.5834	5.32351			3.24323	3.25336	4.34996	5.42704	3.57509	4.06993
MARE4			0.9594	0.687541	1.66446	1.23437	2.37778	1.1252	1.92867	2.12292	0.993108	2.04381	1.26472	4.10933	5.08792	4.50749	3.98342	3.37842			3.37954	5.06092	5.40063	6.5987	6.97584	7.20241
MARE6			0.508522	0.519333	1.01112	0.914437	2.33288	0.59002	1.05716	1.44461	0.876679	1.48241	0.623651	1.815	0.98939	1.72383	1.45146	1.27125			1.20059	1.45657	0.924386	1.63937	1.61453	1.24075
MARE8			0	0	0.575562	0.760387	1.99224	0	1.02567	1.01761	0.423546	1.17072	0.530044	1.54194	1.18598	1.90752	1.92095	1.48985			0.896238	1.17301	1.08033	1.55755	1.71623	1.21615
MARNA			20.2047	13.346	27.0928	30.7613	48.3452	17.7607	35.1502	39.1221	17.4847	38.3147	24.2226	157.43	139.118	156.856	139.118	115.043			107.307	113.219	131.194	138.283	137.045	134.079
MER101			5.66885	5.11942	5.44451	5.69806	8.09689	2.12258	4.83774	4.89862	2.28147	4.82844	3.33975	4.41431	5.62439	6.71573	5.29267	6.13758			3.9203	4.69538	3.81088	4.93661	4.832	4.74989
MER101-int			28.6393	19.5659	24.8941	32.0378	33.287	12.6383	31.7213	23.7736	17.025	27.4961	21.7499	57.3618	39.5827	63.8027	54.399	37.7184			22.1185	29.273	34.3912	37.4485	37.4094	37.9282
MER101B			0.441994	0	0.575562	0.879208	1.84866	0	0.446798	0.962984	0.70446	0.9079	0	2.13123	1.55563	2.10805	1.93381	1.6743			1.62993	0.794261	0.417378	0.594825	0.757283	0.84392
MER102a			10.1451	12.2214	18.464	21.4636	42.3865	11.7973	27.5576	39.1387	16.928	35.2821	21.7562	93.4197	94.6778	102.958	91.8052	95.3393			90.8656	113.373	101.304	107.032	102.354	99.6314
MER102b			12.6984	18.3411	24.2411	25.5362	54.4658	18.5678	43.472	53.6971	30.101	50.578	33.5247	97.4908	99.8244	122.631	106.466	110.06			108.587	121.551	105.953	131.759	118.441	116.247
MER102c			12.6532	14.5778	19.7695	23.8422	47.9641	13.0124	26.2473	34.9924	15.8347	31.3027	19.5052	69.1151	55.3651	71.8568	63.1331	60.9004			52.5614	62.3939	51.0995	66.4469	59.5265	57.7947
MER103C			39.1686	33.6354	57.759	65.9049	103.447	38.7658	84.0037	86.9329	46.408	82.4896	52.5136	243.745	205.815	257.544	222.576	207.471			192.624	244.71	286.394	290.329	292.715	293.492
MER104			11.1839	5.63286	15.3118	16.2798	23.8019	10.4287	23.5997	21.3676	8.70178	20.2131	14.1033	56.9111	48.0941	55.3465	47.1264	38.3121			29.3254	37.6688	47.6556	43.6495	47.1958	44.6434
MER105			2.64562	2.51785	4.90005	6.15458	10.1274	3.13264	8.82674	10.8933	3.60825	10.1232	5.21047	25.0956	20.5284	23.4013	22.9461	18.1913			14.8278	17.3285	18.6973	20.7677	21.346	21.2373
MER106A			1.71529	1.33403	3.1267	3.06191	6.93224	1.66789	3.98864	4.76067	2.74399	4.22308	2.47336	12.8174	10.2956	12.8616	11.2125	10.439			8.73012	9.88892	9.73196	13.2147	12.7788	13.5501
MER106B			4.64609	3.8427	6.35203	6.86675	7.91111	4.83662	10.4908	11.1141	9.25599	10.9461	8.4984	14.9769	13.7476	17.3688	15.0562	14.4492			14.5507	26.3239	21.9278	28.252	25.2235	26.2319
MER107			1.21293	1.72407	2.62892	2.67269	6.75944	1.54748	3.8438	5.06663	2.00235	3.93527	2.30331	12.7269	12.8558	12.0263	10.2574	10.5994			10.4967	12.4346	10.3983	12.6588	12.1449	12.0985
MER110			1.47612	1.33143	2.8467	3.22524	4.99186	1.27157	2.30102	3.03102	1.5441	2.42972	1.85722	6.66463	10.1134	9.68876	9.05919	7.38296			7.65255	9.87912	10.1777	11.9064	13.6258	12.3126
MER110-int			1.36919	0.98148	2.44225	3.32625	5.84167	1.80382	3.82167	4.17702	2.07116	4.83425	3.11213	4.3102	3.62763	5.63332	4.15811	4.30106			3.13162	4.99776	5.59798	6.10247	6.66147	6.65392
MER110A			1.45281	1.67251	2.38003	2.50829	4.55007	1.64521	4.9259	6.12393	2.63506	4.44717	2.92429	4.68459	5.66584	8.18358	6.72131	6.05671			4.1394	8.05486	7.4574	9.19554	10.3656	9.16077
MER112			20.9244	15.5785	32.0473	32.9033	52.488	21.0654	39.1766	51.1344	26.2859	45.1972	27.5634	113.069	111.375	116.686	105.359	95.6541			88.3134	123.854	141.268	126.919	135.499	138.101
MER113			12.795	12.7811	20.8904	23.7934	43.9349	13.2147	31.3078	44.7336	15.6879	38.3455	22.999	92.8542	106.542	114.005	97.2249	90.9401			75.896	102.595	95.5885	108.068	113.861	119.658
MER113A			7.27678	4.87997	9.83122	10.2441	19.5248	6.29316	13.759	15.8965	9.09134	15.4724	9.10349	41.0046	43.3573	47.0325	40.7792	34.7555			30.3694	43.0363	41.0248	42.7773	45.0027	43.6003
MER115			8.23496	11.2238	11.4335	16.1895	42.4626	11.0071	19.9436	24.5608	14.4053	23.8697	15.8244	34.5524	33.0589	43.342	35.6143	39.4847			28.8768	40.124	34.0563	44.3216	39.6633	42.735
MER117			11.5892	18.9776	19.1597	26.3194	48.3973	13.8825	31.6132	42.3602	22.197	39.1215	25.8823	202.25	242.771	213.457	205.678	198.177			185.024	191.759	168.041	178.613	172.525	170.563
MER119			4.87977	5.43327	8.58676	9.77242	19.2595	5.42097	11.5894	15.9147	7.41048	15.4344	7.95522	32.6174	27.2892	33.9954	28.9663	25.6606			21.0122	31.7077	39.9134	39.9755	38.3157	37.2064
MER11A			17.8043	18.5748	22.213	34.4463	49.8186	24.3268	31.3191	39.4269	25.8469	39.4653	29.045	34.7338	39.628	51.4909	41.9742	45.2562			47.9189	64.3673	58.8417	84.8305	63.4131	73.2445
MER11B			8.46541	9.45844	13.7482	17.1229	29.6562	12.8131	21.3079	25.7752	16.8429	22.3857	17.8557	22.2239	23.0413	23.9446	19.6125	22.523			22.1789	33.4216	28.4349	34.723	35.5696	36.0909
MER11C			26.2516	27.7247	34.7198	40.8407	75.3614	31.2065	44.7588	57.4759	40.31	52.9513	40.0474	59.6797	75.7024	74.9456	67.0289	67.4005			70.5207	98.0625	88.1503	97.4034	92.9369	102.734
MER11D			8.12782	8.00678	9.50206	12.1065	14.4715	8.59396	12.6653	14.683	10.7022	13.7875	13.125	11.8318	11.9829	12.4891	12.3729	12.8006			11.238	14.2635	14.8488	16.8379	17.93	18.1376
MER121			1.52125	0.947468	2.38003	3.38121	6.17456	1.93892	2.74591	3.5516	1.71039	2.7766	1.73894	8.86526	8.20209	10.7314	11.6878	10.1296			8.96574	9.27683	8.66045	6.46528	7.93744	7.6837
MER121B			0	0	0	0	0	0	0	0	0	0	0	0	0	0	0	0			0	0	0	0	0	0
MER123			0	0	0	0	0	0	0	0	0	0	0	1.49027	0.745636	1.35043	3.19181	1.05105			0.61413	0.501919	0	0.442025	0.494372	0.777455
MER124			1.49512	1.36026	2.30318	2.93691	4.23759	1.44412	3.38628	3.55006	1.96749	3.24601	1.96347	8.51976	8.64413	11.3898	9.50975	9.06094			10.075	11.8709	20.2969	15.4347	19.4371	17.49
MER125			0	0	0	0	0.778555	0	0	0	0	0	0	0.413791	0	0.716711	0	0.545366			0	0.449526	0	0	0	0
MER126			0.531996	0.453367	0.710275	0.790062	1.75301	0	0.954773	0.8931	0.403402	1.09074	0	4.82232	3.47133	4.89178	4.31893	2.92248			1.81046	1.7733	1.75571	1.5777	2.08174	1.78116
MER127			0	0	0.9489	0.843677	1.4643	0.597545	0.586031	0.860841	0	0.761858	0.466805	6.89098	6.29717	6.07726	5.07706	4.71451			5.59334	13.1988	19.6712	17.6853	21.4252	20.8204
MER129			0	0	0	0.452609	0.653069	0	0	0.657026	0	0.799205	0	3.95902	2.69686	3.6333	3.5454	2.70172			1.56091	1.38596	1.64225	1.72822	1.81411	1.5444
MER130			0	0	0.793342	0.654158	1.30046	0.703379	1.589	1.24777	0.905499	1.20644	0.609674	1.51829	1.47548	2.3123	2.02159	1.67196			1.3069	1.68538	1.56616	1.80545	1.96469	1.63734
MER131			8.6897	5.47115	9.21459	9.13278	11.0075	6.36458	7.74522	9.11821	5.38899	8.73312	5.87207	37.0473	65.0756	53.36	59.108	54.247			73.0755	128.649	146.678	91.9566	108.507	113.632
MER132			0	0	0	0	0	0	0	0	0	0	0	0	0	0	0	0			0	0	0	0	0	0
MER133A			0	0	0	0.419416	0	0	0	0	0	0	0	1.31576	1.03494	0.948199	1.21324	0.413863			0	0	0	0.583204	0	0.414507
MER133B			0	0	0	0	0.646484	0	0	0	0	0	0	0.737683	0.711012	0.680871	0.522666	0.621605			0.583314	0.989467	0.755044	0.738795	0.705787	0.604703
MER134			0	0	0	0	0.625881	0	0	0	0	0	0	1.59931	1.60198	1.36265	1.53921	1.1329			0.883568	0.928903	1.84409	1.36215	1.09198	1.13588
MER135			1.40368	0.829311	1.66446	2.2663	3.97856	1.20851	2.37323	2.37697	1.29499	2.34287	1.20355	17.5973	18.5904	23.2132	25.5326	16.5428			12.0025	13.005	11.0957	10.0886	10.5854	10.3248
MER136			0	0	0	0	0	0	0	0	0	0	0	0	0.417583	0.687582	1.22536	0.695398			0.922272	0.504267	0.550355	0	0.417333	0.529426
MER1A			28.5297	36.2158	45.0093	54.5606	100.885	42.8611	61.3527	82.544	35.7986	71.0546	49.5497	98.1062	90.8438	99.6966	82.3769	87.4378			80.8198	99.6092	85.6206	111.979	102.222	109.913
MER1B			34.3683	56.7229	62.8439	76.3296	184.253	45.9556	86.9676	129.65	53.1613	115.563	73.0993	166.624	154.75	174.994	147.105	171.712			145.088	173.805	153.266	202.287	184.718	195.283
MER2			58.6419	46.9134	81.9068	87.3121	113.865	46.3767	89.62	116.344	46.3505	103.538	63.0512	284.06	287.276	315.416	266.801	246.207			218.647	291.676	299.758	313.277	335.718	336.065
MER20			79.1683	107.057	124.35	156.78	331.933	95.6289	206.128	246.907	135.947	220.775	142.009	456.574	421.665	494.735	433.971	462.908			372.297	468.41	434.852	517.656	495.328	493.305
MER20B			12.0777	16.0853	23.5825	27.4232	54.4598	15.0096	42.3443	51.7887	24.5758	45.8335	27.56	94.4189	80.203	103.318	86.6244	83.7636			69.3767	99.0297	88.5933	106.861	105.811	104.165
MER21-int			5.88663	6.46541	8.85059	11.7395	31.1943	8.11165	13.3645	17.0441	8.09187	15.3755	8.79018	18.6202	13.193	20.4708	17.0524	16.7388			14.6747	18.0402	14.4025	16.6338	15.665	17.1601
MER21A			12.806	20.0413	21.9025	28.893	73.8101	20.4215	39.4	59.1574	25.9785	49.8504	33.3466	67.0642	73.381	75.16	63.0656	71.5057			69.391	95.7021	83.3912	97.0933	101.599	98.3665
MER21B			24.2726	32.2641	40.406	47.9306	111.417	34.0006	60.1652	81.8886	41.2244	83.3611	48.4317	105.743	114.286	123.109	101.304	104.856			100.86	132.552	122.127	146.676	149.529	154.807
MER21C			82.271	133.061	100.605	103.303	241.045	181.154	146.317	182.431	188.548	299.661	213.532	167.246	132.89	184.636	142.465	154.477			127.431	187.834	153.653	176.101	181.979	173.107
MER2B			5.89391	6.64442	11.3635	11.5958	21.5938	7.83566	12.8747	16.8539	6.97164	13.8375	9.0442	43.0602	41.0448	36.3715	31.8647	31.4043			30.2252	38.4262	32.7435	37.104	39.0102	39.0099
MER3			29.3731	34.4942	54.7291	63.292	111.016	38.1323	88.5298	110.43	39.6347	102.014	67.3002	299.755	309.011	316.888	279.957	267.172			242.479	284.17	306.206	328.132	317.045	327.765
MER30			14.6813	15.023	22.6115	27.2714	53.4288	16.0152	35.6346	45.1478	22.0917	41.4003	24.2121	100.729	88.3559	99.6123	85.8982	80.7666			67.3785	95.3518	83.4847	102.873	98.143	100.994
MER30B			1.35374	0.905096	1.6178	1.78404	3.00878	0.64373	1.60088	1.84767	0.874393	1.68221	1.14575	6.17652	5.80895	6.00853	4.90986	5.36529			4.38205	6.83614	8.95778	8.44846	8.08476	8.23364
MER31-int			14.6394	9.39195	18.8529	18.0699	28.1003	11.0566	17.4577	21.594	14.4138	21.3967	15.6648	23.5065	26.6437	32.6721	27.3731	23.716			21.0249	30.0799	37.6568	34.3099	35.4708	40.3495
MER31A			7.49791	11.4923	17.0964	17.7011	35.8219	15.7584	29.7912	30.7762	16.2435	23.759	15.7905	30.7786	32.797	34.4532	27.7888	33.8846			34.0816	53.4325	41.7371	48.3728	50.1068	51.9206
MER31B			5.80293	7.65225	11.4023	14.0292	27.4417	9.15145	13.565	20.5873	9.89825	19.2259	11.1314	28.3433	24.664	30.4162	24.1475	27.2165			26.0555	31.9286	24.6451	35.0863	32.3971	33.4914
MER33			36.1887	32.3651	48.8213	58.0791	99.2634	41.4707	76.7372	96.485	35.8656	83.6756	53.8962	227.769	249.022	265.734	231.132	217.193			178.807	254.121	270.719	266.85	266.051	263.736
MER34			6.75153	9.25725	10.3449	11.8242	28.3529	10.0974	14.294	16.7435	11.5996	14.8616	10.435	19.9531	25.0143	23.6911	20.4031	22.1176			22.1947	32.3956	26.8857	27.0421	26.5383	30.216
MER34-int			3.94229	3.69074	8.83192	8.04309	13.0093	2.38414	4.46651	5.32684	3.54543	6.42337	5.27283	9.07214	11.1044	13.2437	10.6648	12.7443			13.6019	8.63257	9.19501	13.5341	12.4446	12.0702
MER34A			4.81608	4.31864	7.64409	8.10683	18.1743	5.36967	7.9811	13.8448	6.66452	10.4077	6.88731	19.4196	19.4409	22.328	18.0468	20.0227			20.0605	24.659	21.9148	26.7134	27.6712	26.736
MER34A1			2.90023	2.78511	6.08198	5.78759	10.5615	4.55024	7.55229	9.82923	6.54713	10.2777	7.33904	14.1465	13.2305	16.4328	13.0014	15.1688			14.737	18.6378	15.7231	26.3589	23.892	22.633
MER34B			3.45463	4.49453	4.42716	5.52799	9.20291	2.3124	5.62035	6.35253	4.28526	5.57933	3.38866	11.3901	13.5162	14.7482	13.0664	12.0859			10.0794	11.7525	11.0072	13.3579	13.0987	12.4009
MER34B-int			33.3778	11.4102	24.7853	24.3564	23.1143	15.4662	18.2616	19.0133	16.3871	20.3541	17.6718	38.7858	42.9716	43.938	40.4069	33.2306			19.2733	20.8116	31.0529	21.6951	23.7131	23.5064
MER34C			0	0.640079	1.10446	1.21391	1.34874	0.857306	1.26325	1.4078	0.677421	1.29779	0.696924	1.95449	1.50561	2.08754	1.47001	1.71998			1.21065	1.21045	1.43123	1.62685	1.70319	1.53195
MER34C_			12.8521	5.91944	15.5091	13.1778	10.5111	6.78644	9.68334	9.82561	4.94609	10.1383	6.99004	10.3185	16.5796	16.0641	15.14	14.1388			12.6289	17.3214	19.3842	15.8014	18.7075	16.7037
MER34C2			5.55632	5.98958	8.35343	8.48156	10.8443	5.88659	7.71348	9.88676	6.48933	9.60374	8.12566	9.46856	9.34751	13.9612	12.0526	14.84			8.96985	14.7933	12.2996	15.7489	16.4255	18.2023
MER34D			0.770015	0.821116	1.72669	1.63101	3.88823	1.00869	1.60248	2.07981	1.13471	1.67652	1.16281	2.51912	3.41851	3.89846	3.35482	3.29527			3.36995	4.77675	3.80611	4.48435	4.75521	5.16076
MER39			11.6362	14.8126	19.4288	24.93	55.2895	18.3321	27.7693	38.0063	17.9604	32.7875	23.459	42.9078	47.6359	53.0364	43.1537	46.5492			49.7776	71.9482	60.3523	64.2389	67.2905	71.2947
MER39B			14.4053	11.6945	26.9581	19.21	50.7901	20.5163	24.197	31.7757	15.3908	25.1558	15.8673	25.5012	37.2244	33.2989	32.1765	36.8201			44.6995	57.4404	45.8544	41.6274	40.6272	43.5253
MER4-int			15.0017	13.253	22.1479	26.724	60.849	19.5393	32.0294	41.7546	18.0194	38.3053	26.7759	67.3659	81.6063	85.5913	69.504	63.9143			57.6231	84.0656	86.992	94.3142	93.1108	94.8065
MER41-int			38.4818	26.0104	41.8916	47.261	57.4483	20.8995	34.9522	38.4219	25.5171	40.5351	30.2487	66.8131	61.7979	88.689	77.1942	66.3059			51.8664	51.0508	57.9996	65.7312	61.5562	64.3724
MER41A			16.0288	21.5397	28.8711	30.1088	76.1207	21.8849	35.4208	51.6736	24.0998	43.8897	30.4723	36.8082	47.3173	53.9313	45.3213	46.2645			51.2744	67.6155	56.5302	59.0936	60.7605	67.5321
MER41B			14.8426	16.5734	19.5069	26.0073	60.479	19.413	40.6997	50.1653	23.3813	42.9136	28.4928	43.879	50.0623	61.5772	47.4007	50.6598			51.5069	76.5478	67.9352	74.1262	73.2583	75.1461
MER41C			3.06759	3.72451	5.36642	5.41701	12.3812	4.51381	6.43721	9.07542	4.69946	7.71717	5.07464	7.31408	8.59522	10.2453	8.75499	9.78655			9.05632	11.2999	10.735	12.2625	13.466	13.44
MER41D			1.77186	2.53896	3.62448	4.12006	7.53917	2.97067	5.54797	7.43264	3.6234	6.11094	5.10582	11.1237	12.7102	12.3835	10.9522	11.4886			9.33891	12.817	11.9922	12.5684	13.3412	14.4411
MER41E			8.35257	8.39534	10.0982	6.88901	15.7887	6.33652	8.04254	11.3007	8.36316	9.53923	7.13975	10.1607	15.8754	17.3398	12.9208	13.8195			13.3824	20.3851	18.1603	18.9699	17.3919	20.2732
MER41G			3.08313	4.30707	5.0245	4.25366	5.81258	3.20352	4.64203	5.68942	3.11133	5.11807	3.58062	5.98054	8.85756	6.85383	6.48794	8.03184			8.32466	12.6051	9.20626	9.41602	9.64427	11.1633
MER44A			15.4006	12.0454	23.8158	23.1366	30.7843	16.8688	26.8819	36.0917	19.0949	33.0046	20.3528	99.0784	94.5073	105.237	91.0356	86.4823			97.1405	119.913	120.071	116.966	127.148	127.264
MER44B			8.70413	8.78802	13.7102	17.3805	35.1943	9.7707	23.0106	26.4714	12.2394	24.8433	14.1319	48.8197	41.5046	47.9441	38.5121	39.8166			36.5246	41.6599	37.9105	48.0176	42.469	46.5705
MER44C			8.67402	9.0553	16.738	19.2488	31.9493	10.6064	20.129	27.1512	10.8777	26.3253	14.0117	47.3023	47.7228	55.6038	46.0053	42.3858			30.9621	40.6572	40.9553	53.7553	48.9906	53.5825
MER44D			3.10496	2.56826	5.63117	6.07997	10.247	5.90636	8.04435	13.0991	5.11172	11.1776	6.82869	11.9166	11.3965	13.9263	11.0194	11.0481			9.70361	14.0016	14.6159	15.7834	14.638	16.9845
MER45A			9.28211	9.85169	14.0776	15.1989	28.8189	10.4096	17.6882	25.3546	13.2568	20.936	14.6171	29.7344	32.5599	40.1839	35.8182	37.8896			32.994	47.3052	46.6302	49.087	47.3021	46.0661
MER45B			4.55344	3.60695	4.65116	6.59576	10.5649	3.30784	7.01298	9.23156	3.99935	8.49212	5.72052	13.8058	18.466	19.9956	17.8743	16.7936			14.6874	14.5132	14.2711	16.2802	16.725	16.8204
MER45C			1.27798	1.91319	3.33826	4.77317	11.888	1.97336	4.79215	5.92455	3.69272	6.57492	4.77467	5.73475	5.4771	7.67149	6.936	7.2171			6.30497	7.10361	6.55759	9.69653	8.58178	9.38978
MER45R			1.03518	1.44585	2.5667	2.47224	3.02865	1.40399	2.31247	3.50999	1.90039	3.46536	1.96715	3.70854	4.17125	4.77219	4.33962	4.02553			2.77605	4.57905	4.6847	5.85963	4.18425	5.09921
MER46C			15.4143	12.44	23.0278	24.7921	44.0807	15.4991	36.0686	42.5223	21.6094	43.0001	25.9642	88.5446	87.3395	99.2667	86.3921	81.1932			69.6996	89.6573	95.5943	106.07	103.08	106.575
MER47A			14.3266	11.454	25.737	28.5803	43.3257	16.5174	33.8032	41.6277	17.687	36.6151	22.1528	121.6	131.656	131.016	119.575	104.674			102.301	144.453	158.511	158.247	157.992	153.465
MER47B			4.47474	4.07914	5.87073	7.88785	11.4309	5.55567	11.2354	14.1703	8.30761	15.2697	12.5298	13.6939	12.6221	14.3225	12.5369	11.1616			11.1167	19.6582	21.8688	23.945	22.9971	25.8625
MER47C			2.53699	1.7776	3.22501	3.62777	4.04589	2.12256	5.61812	4.03794	2.66883	4.32594	2.96497	9.61878	10.0804	11.4577	9.15192	8.67444			7.94481	11.2705	13.1908	13.5596	13.419	13.5667
MER48			0	0.506725	0	0.729983	2.8191	0.621744	1.04594	0.932979	0.646133	1.16209	0.826065	0.820331	0.949929	0.964023	0.825201	0.702025			0.883391	1.10315	0.983344	1.14257	1.11749	1.04927
MER49			23.9165	25.2811	28.2657	32.4148	49.9754	19.9429	32.4155	37.577	25.3492	36.8149	29.7505	47.5425	65.9828	77.4232	71.6053	66.1333			53.8068	87.3429	73.5498	77.6169	84.6737	85.3837
MER4A			7.4427	8.45616	13.4868	13.067	28.0104	8.4877	14.472	21.6811	10.2332	17.9257	13.9003	30.8702	36.3926	38.1349	33.6903	34.0928			32.2906	42.9183	38.6492	39.672	44.1934	45.5011
MER4A1			17.4291	18.4012	22.4149	26.9107	51.7616	17.3204	25.9241	34.1836	20.0143	31.69	25.1131	41.6664	48.0436	53.7742	44.5498	45.4428			43.9645	58.2401	48.7152	57.4771	54.5043	63.8688
MER4A1_			2.14585	3.17698	4.15307	5.16217	10.0352	2.91634	5.65873	6.5065	2.85541	6.34232	4.46452	10.6555	10.8814	11.5807	10.1647	9.50988			9.27331	13.2767	10.2004	13.7513	13.4244	13.434
MER4B			11.2512	10.5403	14.5291	16.1634	34.3861	11.9788	17.6682	24.0791	16.955	23.8926	17.4011	25.589	29.1164	33.5373	26.3671	28.8632			27.9451	43.3917	41.1201	45.3141	43.3705	51.5897
MER4B-int			6.10353	5.63635	7.0623	10.4779	24.9175	10.057	14.6769	18.9247	13.3084	17.9061	16.2701	16.2981	16.6826	20.5009	18.7179	18.2283			18.3781	29.4747	32.8808	32.2775	36.2864	39.6423
MER4C			2.98091	3.76086	7.17119	6.85316	13.607	4.17617	10.0964	11.8915	4.81263	9.72293	6.44991	13.274	15.3764	19.4164	16.4605	13.9632			15.891	23.8184	27.2698	32.5356	28.8167	28.5607
MER4CL34			5.42557	6.81355	10.0023	10.5259	17.2022	7.24605	12.5257	13.4081	6.65997	13.167	10.9365	14.0157	17.2488	22.0578	19.1638	20.3134			16.8853	21.6099	20.9797	24.0529	24.4162	26.0144
MER4D			6.46622	8.72684	12.906	13.7256	28.3349	8.59494	16.6013	19.5031	11.2981	17.6892	11.3604	22.9908	30.745	30.1433	25.137	25.1026			22.3797	31.1914	26.5162	32.0896	31.9203	32.9097
MER4D0			3.60146	6.35679	5.91118	6.99206	12.1509	4.287	9.65185	10.9964	5.50134	10.6032	7.5869	22.9915	24.7373	32.0555	29.4403	26.5259			26.0191	37.838	34.6093	39.1456	36.271	35.1444
MER4D1			13.229	13.8032	19.4475	19.9866	40.8994	13.8967	25.792	30.7882	19.5338	29.5604	21.3419	33.2188	35.7241	48.6859	39.0901	38.2706			33.2047	43.6674	44.6507	57.5896	48.7397	55.5412
MER4E			2.83295	2.80541	5.78642	6.30753	14.065	4.1092	7.21837	8.59265	6.10913	8.72443	5.13686	13.712	15.4364	17.4219	15.7057	15.6899			13.8552	17.916	16.1501	20.3815	19.3875	20.5526
MER4E1			6.09607	6.62535	10.2674	10.7127	19.2571	7.61774	15.4234	16.9788	9.33752	16.1388	10.9654	19.8378	25.9847	24.8446	20.1631	20.4267			19.5074	33.1464	28.7858	33.1918	31.718	34.422
MER50			15.7432	21.304	25.9986	28.7447	74.84	21.9239	30.1888	42.7825	22.855	36.4676	25.9068	30.6663	35.1562	39.4787	35.0161	37.8847			47.1692	67.501	49.3256	55.3577	51.9029	57.9408
MER50-int			5.19183	8.12673	8.64899	11.9594	23.7928	6.31108	9.48717	11.1529	6.21683	10.7257	5.55878	23.1743	24.2412	27.7525	22.2269	23.6216			22.1484	24.8768	17.873	22.8247	22.4711	21.0379
MER50B			2.22064	3.25823	4.90005	5.00601	11.3977	3.19163	5.98202	6.25263	4.07494	5.37875	3.84166	7.38548	8.40595	9.19063	7.2177	7.31991			7.68988	12.9995	7.82632	11.2525	13.5861	12.9366
MER50C			1.75539	1.47615	2.66003	2.80055	2.85933	1.08717	2.20906	2.55184	1.29237	2.26166	1.9774	2.41744	4.0402	4.07757	4.48989	4.45784			4.69788	7.62988	4.65616	5.28121	5.87433	6.00044
MER51-int			4.65554	4.46078	7.62231	7.88117	14.7361	5.58233	10.7805	11.2459	5.44579	10.3004	8.34339	17.9727	17.8092	24.9148	19.746	14.5815			17.1709	24.7769	34.1352	25.7479	20.5082	22.4599
MER51A			17.4978	20.5107	26.4447	26.5316	48.8128	24.5733	30.3894	46.8676	17.2311	42.2328	30.3954	29.7867	38.2226	39.165	36.1827	40.7068			46.5805	79.7809	60.3064	53.7471	54.8075	62.6509
MER51B			2.60596	2.5973	4.26227	4.41149	8.55122	3.05072	5.64918	6.93956	3.33672	6.55387	5.18912	5.92901	6.56374	7.21499	6.28873	6.92471			6.41104	9.59226	7.97928	8.83812	9.08202	10.3428
MER51C			4.23854	5.24215	8.10454	7.57802	12.1669	7.06211	8.45202	8.75375	7.48041	7.99536	6.40506	6.82799	7.96526	9.11397	9.45497	9.75408			9.62689	13.1419	11.205	12.4526	11.314	9.9955
MER51D			2.6837	2.98371	2.16225	2.42833	6.28339	3.23422	4.038	4.34261	3.16578	3.66705	2.73843	3.94034	4.75954	4.35596	3.78971	4.59			5.05319	7.06487	5.28776	4.53006	5.52196	6.06903
MER51E			2.35529	2.8249	4.09116	3.94044	8.41171	3.83375	4.66339	6.08119	2.3849	4.87235	4.27536	5.53517	7.99058	7.54138	7.40582	7.42454			9.58288	13.8164	8.96774	10.5266	9.98003	11.3351
MER52-int			1.0953	1.51255	2.50416	4.03103	11.93	1.83302	2.7292	4.06553	2.70307	4.07829	2.11608	4.30418	4.05576	4.77478	3.99729	4.42118			5.54957	6.00778	3.2776	4.19495	4.9245	4.7138
MER52A			13.5731	19.9273	15.3846	31.4252	75.2208	25.052	43.4691	49.663	32.5267	49.4293	40.4715	37.2661	36.7974	44.4522	35.8893	47.22			34.2277	55.4543	40.902	59.7894	49.0363	57.0062
MER52C			6.93983	9.21105	6.11309	8.80415	26.0719	7.57467	14.418	15.1163	6.30908	12.4525	11.6107	9.92097	14.8313	13.5134	10.481	15.2357			16.2038	25.1432	19.033	17.3608	17.6144	20.9633
MER52D			7.60701	11.1795	6.61119	8.51646	25.3392	6.36495	11.6084	14.0972	12.6942	11.8838	10.5451	10.6271	9.62211	8.78262	7.79409	10.8113			7.02458	9.5147	6.73145	9.53864	9.29061	9.50134
MER53			11.8803	9.61241	14.8884	16.1668	31.7203	10.5406	21.3155	24.6412	12.7262	22.1191	16.0501	74.3472	89.8561	92.9848	88.2222	81.1553			80.7241	105.187	112.777	111.784	107.751	118.795
MER54A			3.838	5.70907	7.66089	8.14373	18.8947	5.28409	11.6356	14.3433	8.53096	12.2029	9.77892	19.7278	18.376	18.6122	15.4129	17.1048			15.2159	26.1827	16.7207	21.9317	25.0545	24.6769
MER54B			0.794059	1.65315	1.66446	3.0853	6.58333	1.91685	4.52512	6.36941	3.63446	4.54458	2.77005	7.4415	8.56411	8.43831	6.47975	9.08207			7.56839	13.6001	10.5514	11.5404	11.156	11.3778
MER57-int			12.9372	9.07681	12.4934	17.3964	25.8564	8.13882	15.1143	15.2257	7.37623	17.2108	13.759	27.3417	24.7806	37.4527	29.2711	28.1879			19.8287	18.4456	24.8639	33.0748	25.2303	31.3782
MER57A-int			16.6893	13.821	27.2194	31.5066	45.0318	16.6203	20.4365	21.5282	12.6574	23.3104	15.0413	78.5336	86.2795	101.289	91.5323	76.2475			50.9172	42.5899	43.2706	44.924	42.1001	41.7308
MER57A1			2.8019	4.20395	4.8145	6.69195	11.46	3.47694	7.5306	9.42522	3.8857	8.03371	4.57649	9.63573	11.9708	14.2831	10.1678	11.0252			10.3603	15.6013	13.9971	14.1468	14.2487	15.1822
MER57B1			4.97764	4.85394	6.75119	7.95923	8.54168	6.05579	10.6392	11.6045	6.06492	8.81703	6.77739	11.0683	14.1031	15.2753	11.6579	13.5032			14.615	23.1874	16.9525	16.9416	17.9369	20.9492
MER57B2			3.70372	4.41259	5.61562	6.57349	12.4356	3.62903	4.91939	7.90394	4.78865	9.01618	6.19832	27.9084	23.8632	26.3586	26.2767	23.4965			18.9101	19.1041	22.524	21.2368	22.4843	24.0021
MER57C1			3.76031	3.65578	4.49561	5.17572	3.29979	4.14058	4.52078	5.23209	4.3469	5.69382	6.44912	9.81851	11.1637	16.2036	14.7271	11.8806			7.11533	6.66852	7.55063	6.75744	7.47655	7.439
MER57C2			0.877633	0.860967	0.980011	1.60668	3.78402	1.04253	2.35896	2.68327	1.59359	2.58703	1.61767	4.87413	5.35598	8.54006	7.1137	5.81901			4.49524	5.16842	6.80263	6.61494	7.06682	6.09
MER57D			2.53092	2.39347	3.90449	4.02267	6.68684	3.07015	3.75872	4.58891	2.31186	4.83695	3.09994	7.1927	6.31584	7.39396	6.14027	6.32509			5.86032	8.42316	7.39176	5.96155	6.10839	6.79596
MER57E1			7.77753	7.77224	14.5847	10.3476	22.8132	13.8404	13.7944	21.518	9.04387	14.8353	13.4287	4.91596	4.45546	5.80548	4.4057	4.4334			4.28434	8.76704	9.18528	9.48499	8.30122	9.59429
MER57E2			0	0	0	0.448413	1.38975	0	0.427064	0.936214	0.527357	1.05244	0	1.12506	1.64232	1.18586	1.22573	1.04914			0.998492	1.66583	1.94417	2.24552	2.36087	2.15637
MER57E3			1.13837	1.69721	2.28669	1.89484	8.51	2.63341	3.7709	5.71513	2.87828	4.90554	2.96737	9.15416	7.52444	7.33134	4.75677	6.86307			5.4789	9.1271	9.48003	11.0552	10.3315	10.8986
MER57F			1.06991	0.851889	2.13113	2.34399	5.16591	2.24052	2.65199	3.22828	1.67519	3.21733	1.85539	5.256	6.30076	5.92722	5.07561	5.2378			6.68832	10.0472	11.4667	11.056	9.078	10.2763
MER58A			61.3511	62.3382	91.6124	109.918	184.23	61.1695	143.564	156.915	74.4494	147.878	91.2564	396.944	383.559	434.415	396.122	359.991			287.295	364.783	395.34	434.653	426.227	422.688
MER58B			29.958	30.2709	47.0141	53.3479	92.0457	34.6312	74.8993	90.7001	36.0045	82.8828	52.7206	248.932	259.951	283.59	258.516	239.535			193.454	243.428	249.926	254.774	253.631	247.508
MER58C			9.14284	9.54229	15.9446	18.9173	33.0288	11.5878	29.7126	27.1738	14.7357	26.5802	16.7416	83.9859	88.2017	85.6732	78.7225	73.2314			62.801	78.3203	75.1973	82.6803	81.2463	80.3028
MER58D			3.63921	2.80834	4.7137	5.18198	8.7623	4.00361	7.34056	7.21206	4.40984	7.08942	4.54152	17.0801	12.8138	16.5024	14.2166	13.6702			10.6847	11.5187	12.5794	14.2515	14.0286	13.528
MER5A			138.862	159.042	190.463	237.571	427.828	155.042	320.875	352.964	172.846	327.963	219.005	653.888	642.787	796.177	691.009	679.279			539.633	766.69	812.733	877.508	821.856	778.513
MER5A1			54.2554	59.9865	84.91	100.596	188.919	58.233	119.393	146.36	75.74	133.104	83.8979	238.66	225.947	279.986	248.022	246.049			233.319	312.284	324.576	350.505	320.71	319.232
MER5B			109.163	107.846	133.561	164.887	277.004	105.295	216.699	232.953	130.668	224.306	146.081	521.282	545.597	598.147	526.609	509.019			432.918	589.007	612.078	626.489	611.901	586.786
MER5C			1.86864	1.96042	4.51116	5.38437	9.39552	2.58781	5.90471	7.41372	2.50968	7.25674	3.36707	24.7697	29.3743	26.2879	22.4542	21.3545			17.1822	22.7091	23.5241	27.6321	25.9672	26.2396
MER5C1			2.54996	2.68932	3.62448	4.63712	6.92523	3.0848	6.12621	8.05727	2.42001	6.91883	4.41364	12.52	13.7958	14.675	13.7156	12.027			10.4087	15.295	16.2828	17.8449	19.3401	17.9265
MER6			6.97736	8.21338	11.9312	14.4754	19.7913	6.82034	9.77308	11.3675	6.26366	10.866	6.49944	21.2304	17.0361	20.2299	16.2818	17.0208			13.9203	18.2082	14.458	18.6325	17.4264	17.6229
MER61-int			15.7791	14.6995	22.898	28.2199	47.6159	13.5639	22.7283	27.1726	17.2696	26.2039	17.6513	27.3501	35.3788	40.1251	36.2952	33.1068			42.3357	55.5173	54.9984	46.6799	47.3186	48.4669
MER61A			0.859613	1.67728	2.3486	2.84227	6.18598	1.93055	3.12604	3.20384	1.45846	3.0649	1.91819	4.25352	4.18438	5.04519	5.00483	5.94109			5.53201	7.08593	4.48945	6.2468	5.66356	6.19425
MER61B			0.711293	0.998263	5.21117	2.78095	7.84153	1.53426	2.08775	4.42322	2.83151	3.25298	1.70974	2.91369	2.84261	3.72229	3.06595	5.18724			4.18937	6.42806	3.11466	4.69438	4.66605	4.13885
MER61C			0.531295	0.551903	0.980011	1.39182	3.23402	0.811411	0.763034	1.90465	1.02751	1.86744	1.03672	1.6902	1.4117	1.9078	1.61126	1.59433			1.99202	4.38187	2.23426	2.13233	2.22254	2.65354
MER61D			1.04598	1.5117	1.3689	1.54362	3.70281	0.802285	2.54225	2.92258	1.64589	2.9492	1.33878	3.42835	3.01823	3.68333	3.20657	3.06579			3.07049	3.52413	3.12554	5.21057	4.38122	4.88589
MER61E			3.2697	3.9384	3.31337	4.00246	5.65563	2.38823	5.0441	7.43536	5.38163	7.95022	6.07726	3.94353	5.74358	9.44536	8.39666	8.67506			5.16632	9.64048	10.9778	15.1078	14.5258	15.4521
MER61F			0.744123	0.968587	0.575562	1.02515	3.85173	0.991208	3.18781	2.22679	1.37763	2.28852	1.43703	3.36489	5.39286	6.26484	4.44377	4.57063			3.30597	3.42035	3.19878	3.25396	3.28893	3.89276
MER63A			8.82107	9.99591	15.011	18.7594	32.041	11.2487	23.3039	28.2152	15.4029	28.5191	17.9354	44.4863	40.2497	57.0671	51.3846	47.5486			50.326	60.5878	54.801	70.6779	63.6309	63.9887
MER63B			14.7111	12.285	13.0911	17.2441	28.4265	11.2778	19.604	22.1664	14.4622	18.6074	12.9336	35.3674	37.3477	48.3671	34.5385	37.5455			30.3311	37.4709	35.3289	41.5497	40.9274	38.3178
MER63C			6.76214	5.70046	9.79482	10.6502	11.8301	7.05838	12.5809	14.942	5.64792	12.9743	8.84807	17.0361	22.6607	24.7158	23.3469	21.045			18.6113	26.4608	30.5578	28.258	32.7192	31.308
MER63D			3.02738	3.86353	6.15074	5.8338	10.4617	3.61036	5.8167	8.20009	3.91878	7.15712	4.84603	23.4651	29.869	32.1853	26.5485	24.4761			23.5007	29.4683	30.2289	32.961	34.9516	33.1428
MER65-int			22.9074	9.38019	19.3252	21.8415	37.278	13.9026	21.5892	15.8647	22.0043	15.5467	11.4424	27.9091	23.0277	35.2175	26.9094	22.8696			16.2161	18.1136	17.5665	22.4808	18.1458	18.3878
MER65A			7.47529	7.46024	9.909	13.1845	26.0727	7.47048	9.55367	13.6291	8.63152	12.4051	8.28756	23.6165	24.0884	25.5194	20.8733	20.8491			21.6464	23.5738	21.5267	25.563	23.758	26.5219
MER65B			1.40644	3.00736	2.8467	1.93451	2.75276	1.04288	2.65964	1.98369	1.80697	2.00029	1.91763	3.55049	4.064	4.60163	3.75447	4.07427			2.69026	4.5228	4.29439	3.90883	3.65761	3.77166
MER65C			2.50845	3.09832	5.11784	5.2617	9.81486	3.10152	5.23414	8.89901	3.30613	7.19792	4.26818	8.53206	7.74775	9.37165	7.41474	8.22524			8.90084	11.2557	9.65445	12.1586	11.122	12.1007
MER65D			2.61215	3.67054	3.55604	3.88262	7.18679	3.55525	4.19348	6.90843	3.07417	6.19274	4.16594	16.4956	18.9144	20.5989	18.2711	18.9501			19.044	20.2077	22.2616	21.5164	21.4553	21.7571
MER66-int			7.62877	10.4751	8.69503	11.0534	23.7153	8.26531	13.6709	21.1771	8.67062	20.0168	12.907	19.9799	25.8574	31.6815	29.4418	29.6772			26.7637	37.1456	35.235	34.9054	36.8791	44.8305
MER66A			0.772441	1.10308	1.50891	2.04012	7.62394	1.34247	3.04679	4.74699	2.03009	3.52196	2.17164	3.20702	2.76489	3.44938	3.47733	3.55149			3.32125	4.01758	3.1247	4.77359	4.09656	4.63456
MER66B			7.40213	10.4457	10.81	12.7658	27.3796	8.26106	14.8227	20.0417	9.89692	18.1194	13.0472	20.6339	22.7514	28.782	24.9009	27.475			18.2869	24.0269	22.8627	31.5124	28.8424	31.0998
MER66C			4.85212	4.56078	5.52228	7.70076	9.4276	3.32761	7.49413	6.93914	5.70823	7.1274	4.84238	7.41459	8.87928	12.0108	11.73	9.6861			8.64105	9.97211	10.4222	13.517	13.1015	11.6296
MER66D			0.564957	0.991495	1.01112	1.23665	1.75254	0.701523	1.35177	2.32404	1.73656	2.70224	1.81166	2.22374	3.03393	3.37834	3.21789	2.53559			2.3877	2.58528	3.68625	4.42492	4.09159	4.26904
MER67A			6.27117	7.48959	6.22229	6.99543	12.0785	5.47188	7.95646	9.8684	7.48888	8.3296	8.49847	12.7761	12.2775	14.425	11.6795	13.2268			11.3495	12.2934	10.6832	14.0119	14.4379	14.917
MER67B			6.82388	9.03708	10.5001	9.87714	18.2975	8.38735	15.8945	15.8727	9.85651	12.6804	10.3874	14.9672	14.0921	21.1539	23.2987	21.2133			18.7709	23.0713	19.5463	22.3882	21.7127	20.7757
MER67C			9.58195	10.0815	13.3776	17.2306	27.734	12.2263	20.1612	22.4756	11.3098	20.2744	16.3887	27.0079	31.2037	33.9809	29.1461	26.8865			26.7213	30.6844	35.7212	35.29	34.306	34.2386
MER67D			1.86355	2.02875	4.75228	4.51804	7.4977	2.31906	2.72144	3.4176	2.19041	2.68613	1.57738	7.22071	7.92054	9.5679	7.68735	7.95163			6.26113	8.44936	5.91033	7.35363	7.22261	6.95463
MER68			21.9313	26.3251	32.6885	36.1182	64.4223	18.5419	39.2876	51.7126	20.539	46.6646	28.3506	88.4414	90.4469	92.2839	80.9803	85.2352			70.4612	80.7657	71.9353	90.8253	90.4243	90.7343
MER68-int			81.2106	74.5118	72.0383	87.2871	53.3377	38.8703	37.1643	46.9889	35.3873	50.2221	40.7978	62.8867	77.2143	97.698	96.4637	84.6569			60.9597	61.3352	63.5006	65.8653	62.8565	57.8999
MER68B			2.66294	4.33768	5.92642	7.64439	15.7323	5.7438	12.1498	18.2449	7.12676	16.5744	10.8226	22.5941	18.0366	22.1549	20.7084	20.2253			19.6345	30.2596	28.277	35.8773	33.4185	34.6733
MER68C			0.636261	0.793366	1.29113	1.28247	3.23069	1.14227	1.02938	1.87078	0.809196	1.63919	1.27484	2.38899	2.70778	2.59803	2.23003	2.32907			3.312	3.79204	3.16574	3.94282	4.01945	4.62754
MER6A			13.7908	12.3642	14.1398	16.4281	29.8196	11.677	15.2978	20.9933	9.58888	17.7803	12.2623	26.0516	27.8009	38.5971	28.5527	31.3177			33.3335	41.3769	31.9148	31.2119	30.0855	34.1504
MER6B			1.68867	1.60507	3.9356	4.39426	8.38312	2.11745	8.74382	8.49007	2.55466	7.68337	4.78089	22.0153	19.6454	21.7974	21.5518	17.9631			13.9014	17.9343	23.3054	25.8074	22.679	23.4867
MER6C			0.61996	0	1.2289	0.709366	0.927388	0.723425	0.892378	1.01403	0	1.04679	0.449741	4.20534	3.50511	3.13567	2.01105	2.53879			2.1073	2.58814	2.83412	2.07932	2.39574	2.48865
MER70-int			5.25014	6.38395	6.48674	7.69346	15.7117	6.03053	9.24933	10.4756	5.44751	9.2728	7.42659	12.5748	13.9421	11.4202	10.6171	11.3754			13.8656	21.5844	15.7964	15.8886	17.8247	17.872
MER70A			5.21486	6.05362	4.69783	6.17682	9.35385	3.46974	4.41631	6.04162	3.85241	5.97816	4.38918	10.1059	12.2352	11.0242	8.38523	9.9217			9.91272	10.1128	7.84767	9.18726	7.60288	8.24171
MER70B			0.74948	1.20339	1.40002	1.63399	4.19388	1.2716	1.33823	1.69058	0.843381	1.62798	0.99249	3.77967	5.57884	5.42698	5.33852	6.27451			7.10319	8.27897	8.19284	8.98897	10.4144	10.1948
MER70C			1.39607	2.07872	2.28669	2.72297	5.56309	2.16695	3.55342	4.6515	2.26327	4.69676	4.08402	3.92198	4.79486	5.28981	4.4886	4.97538			5.07917	6.34161	5.66141	5.71658	5.67149	6.48552
MER72			18.4148	16.3703	20.4555	21.3476	24.054	11.8765	19.2959	17.5551	11.1387	18.9365	13.4117	10.6265	11.0021	14.904	11.7222	13.9255			12.517	19.2458	14.9851	16.0264	17.1873	16.8275
MER72B			0	0	0.668896	0.882751	0.760131	0.496995	2.08431	1.91258	1.02132	1.79012	0.958452	0.824925	0.888193	1.28173	0.95093	0.926256			0.721539	1.89588	2.47328	2.08116	2.31668	1.79175
MER73			1.36222	1.24866	2.65972	3.15453	5.31956	1.24134	2.09086	2.94034	2.15919	3.16634	1.74477	5.13772	3.81028	5.39728	4.20267	4.30227			4.57742	4.42451	3.21799	5.09021	4.44608	5.03116
MER74A			12.4163	16.0977	16.6446	20.9908	37.9106	12.6472	24.3722	32.9415	18.5212	26.6505	17.0013	39.0724	37.8427	47.6681	38.2949	44.2596			36.6771	49.7381	40.326	51.1491	51.5012	51.5492
MER74B			9.3971	13.5605	14.3735	14.6742	34.4908	9.01662	17.5412	20.6776	13.342	19.0001	12.8785	29.2235	42.9696	50.2637	51.9336	48.3093			39.7876	64.4899	63.921	76.311	78.8478	76.3972
MER74C			1.96959	1.78826	2.19336	2.44791	5.83762	1.4892	3.12891	3.29469	1.80299	2.79623	2.03511	3.1756	4.84214	4.92257	5.23722	5.06269			4.65306	6.48761	5.2833	5.23144	5.8202	5.21827
MER75			1.79593	2.30594	3.59337	3.90337	7.34004	3.06614	4.5979	6.62984	3.03454	6.70183	4.21053	13.064	12.9428	10.6289	8.54221	10.0194			7.56632	12.192	15.3088	13.3522	12.9259	14.832
MER75A			0	0	0	0	0	0	0	0	0	0	0	0.456831	0	0.422357	0.483235	0			0	0.488139	0	0	0	0
MER75B			0	0	0	0.4272	0.764072	0	0.42087	0.901621	0	0.943595	0.512195	0.978201	0.947051	0.959626	0.739132	0.674398			0.752788	1.33178	1.33653	0.876792	1.04034	1.31706
MER76			2.72784	4.29185	3.81115	4.93706	9.67034	2.4172	3.55336	4.10591	2.35084	3.51226	2.24737	9.27982	7.17395	9.98631	8.59069	8.13977			7.51118	7.49616	6.45988	7.99885	7.18056	7.4412
MER76-int			0.955569	1.40593	1.55028	1.99588	2.60149	1.26723	2.80818	3.33239	1.47277	2.6389	1.88549	3.56456	3.0159	2.8066	2.65135	2.16692			2.48352	3.14916	3.96482	4.19901	3.89537	4.06676
MER77			20.1598	25.3694	24.8055	32.8059	60.0695	33.258	54.668	54.9888	27.5904	51.4555	37.436	46.7995	53.816	64.0482	58.7513	60.8349			59.7114	95.5435	87.3026	83.1598	87.3023	84.0794
MER77B			6.8581	9.03574	12.0392	14.7172	28.8698	7.73898	16.5005	21.3762	8.53689	20.3548	11.8229	32.7904	27.5019	35.0981	26.9023	28.6329			26.6471	35.2803	32.4679	40.5011	39.1778	37.3361
MER8			8.82588	10.4554	13.8645	18.0109	26.6227	9.70109	22.9976	23.5768	13.1278	25.1403	15.6466	65.1913	55.2708	66.8384	59.3591	54.8957			45.5648	60.5302	62.27	70.821	69.0663	66.18
MER81			7.46248	9.75488	10.749	13.8581	29.4291	8.99408	18.6583	24.3792	9.89386	20.8467	14.0241	37.055	38.3574	42.7521	40.4401	40.5843			35.352	49.9784	42.8035	50.1386	48.4007	48.1734
MER83			5.03277	8.26866	8.78899	11.0891	16.4344	5.40675	12.5749	13.3422	7.65442	12.3473	9.5098	10.9666	16	15.2132	13.4147	16.1754			15.2955	22.0696	19.0002	22.8299	21.1765	23.1869
MER83A-int			0	0	0	0.741889	2.34562	0	1.02252	1.7729	0.858693	1.36976	0.577201	4.48054	1.66747	2.94375	3.02555	2.627			2.34477	3.87637	4.54515	4.52505	3.83214	3.53333
MER83B			0	1.42266	4.17671	3.72247	13.3218	1.56554	4.97344	7.67124	2.20872	5.47035	3.32772	5.15148	5.55521	5.89179	4.32105	5.40719			5.03397	11.3152	11.5557	11.2624	12.129	11.5313
MER83B-int			0.826305	0.967661	1.35335	1.54017	3.49329	0.73483	0.963975	1.97856	0.932221	1.64637	0.681483	2.90916	3.44476	4.02745	2.68276	2.99488			2.7647	3.20789	4.52946	5.03395	3.32249	4.18098
MER83C			0.675408	1.51611	0.952011	0.946101	2.35746	1.05025	2.11657	2.18248	1.15158	1.66677	1.13285	1.43841	1.72399	2.27344	2.21773	1.83531			1.72665	1.93555	1.33025	1.77969	2.22408	1.93513
MER84			0.644489	0.661438	0.980011	1.74647	3.515	0.831976	1.4281	2.61385	1.20764	1.95062	0.996811	3.21228	3.4646	4.08754	3.52624	3.33378			2.7103	6.02223	6.09545	8.86465	7.46568	7.35591
MER84-int			0.51529	0.468195	0.753831	1.33384	2.15366	0.832602	1.09332	1.61825	1.04323	1.84733	0.875408	0.723043	1.00848	1.59758	1.42052	1.60843			1.47839	2.52894	1.7076	2.59524	1.99962	2.06585
MER85			1.83031	1.47197	3.01781	3.50228	7.00633	2.20234	4.63609	6.1779	2.17133	5.80505	3.54754	17.6142	18.8157	16.0336	12.7057	13.6155			11.9777	13.5674	12.5538	14.5911	14.3341	14.5539
MER87			0.612062	0.618204	0.730808	1.40565	3.77613	0.984316	1.28722	1.87264	1.02634	1.2976	1.09046	2.02234	2.49645	2.4684	2.09086	2.04908			1.9385	1.99037	1.32772	1.91839	2.04601	2.04876
MER87B			1.94241	5.52361	4.06005	4.62864	4.57437	1.39546	2.12351	3.47684	1.57689	2.73223	1.73525	5.28506	3.68657	6.19591	5.75195	6.75324			6.22985	5.24446	3.74375	6.04216	5.71654	6.08344
MER88			0.595509	0.816798	1.28086	1.24718	1.53937	0.886049	1.64248	2.62054	1.73565	2.06245	1.70043	2.24247	2.41469	2.86562	2.44452	1.86949			2.14727	4.70699	3.7809	4.96364	3.95851	4.78309
MER89			7.87855	12.113	14.8087	16.4706	29.0291	13.7443	18.6506	28.2434	17.2701	22.9396	17.2874	19.2718	19.7411	25.886	22.0309	23.8255			24.4434	34.8719	29.5466	35.2058	34.2542	36.0061
MER89-int			2.1202	2.46445	5.00894	5.2245	11.1367	2.62419	6.198	6.64195	3.18374	7.22479	4.91678	7.14094	10.0221	11.1682	10.7697	8.88017			9.48081	13.1775	12.5308	13.4616	13.8475	13.1075
MER90			3.10425	4.58929	7.20261	7.04301	11.6323	4.19901	9.06994	12.178	5.15098	10.2205	6.20062	15.1118	15.9943	18.5291	15.8366	16.1389			15.0558	19.2564	18.8527	19.6043	21.3011	21.3971
MER90a			14.461	14.7625	21.4486	21.509	33.8329	17.2987	25.4093	32.799	18.0578	29.3666	21.8344	40.7747	49.9527	52.1894	44.6731	44.9191			45.6304	57.5903	53.1503	59.4891	54.7223	59.2062
MER91A			17.3552	24.8053	23.9608	29.8023	50.1844	20.9801	48.1376	51.4195	32.6924	46.3961	37.2118	50.9571	54.3147	69.0888	59.953	63.2471			59.7309	97.1936	97.1984	102.69	101.694	98.7955
MER91B			5.10102	5.87149	7.88675	9.44205	15.0093	6.0499	13.7624	16.5618	8.53763	15.1893	11.9916	31.8022	32.6809	34.857	29.2058	33.3706			26.6608	36.4656	30.2793	36.7664	36.9529	37.5907
MER91C			3.10426	4.81807	6.30007	8.22685	15.6957	9.09289	17.8528	22.1673	9.60133	16.9556	15.1577	52.111	46.6303	37.8134	32.2258	28.1908			18.3779	23.8188	18.9131	23.8766	23.2251	22.6742
MER92-int			5.97117	3.75891	6.92323	8.11448	11.1064	3.63632	6.8261	5.5861	4.29253	5.76616	3.99733	10.521	13.2231	17.1277	12.8044	12.3896			8.03458	9.02194	10.1631	11.0653	11.2355	11.3457
MER92A			0	0	0.513339	0.56501	1.23974	0	0	0.401048	0	0.4559	0	0.80351	0	0.845646	0.441005	0.703651			0.541944	0.759144	0	0.4993	0.661962	0.632876
MER92B			4.92791	6.57822	8.32232	8.43406	25.2518	7.89879	18.155	23.073	9.56937	16.3684	11.4654	27.3671	27.4917	29.1218	25.0204	25.016			28.731	50.3088	45.1218	41.1846	45.083	47.1948
MER92C			0	0	0.762231	0.856394	1.554	0.673192	0.773362	1.38214	0.523111	0.791551	0.665169	1.18382	1.47279	1.80922	1.72403	1.62524			1.33766	1.31249	1.05076	1.10797	1.10426	1.15737
MER92D			0.512829	0	0.606673	0.75426	1.59756	0	1.12512	1.19551	0.534381	1.67114	1.09048	1.64577	0.942326	1.53519	1.20601	1.44913			1.22507	2.28858	2.24763	3.2001	3.22592	4.38386
MER94			11.627	13.4097	17.5935	19.8552	37.0612	11.8485	25.45	28.8928	16.3359	26.3091	16.1447	61.7713	53.8441	70.526	58.7862	55.6291			49.2566	75.6963	74.5715	96.2604	97.5287	90.8683
MER94B			2.43976	2.25513	4.1288	4.4772	7.66287	5.00122	11.9697	8.19244	6.82289	8.8386	6.99831	11.1326	10.1742	15.188	13.9258	11.3672			11.7662	15.5898	13.419	16.215	12.8992	13.1817
MER95			1.65505	1.7274	3.15781	2.7507	4.62541	2.66755	3.31657	4.23388	1.7983	3.03291	2.20805	5.78865	7.72842	6.27868	5.39339	5.05912			5.99758	10.5569	8.50098	6.23869	8.40309	7.49492
MER96			2.77138	4.95532	5.3353	7.51473	13.4658	4.89087	13.0953	16.917	7.79048	13.3073	11.4446	13.27	14.038	15.3293	14.6305	16.0649			13.6257	21.3614	19.8794	22.0923	22.3621	21.042
MER96B			4.01845	4.87213	6.82897	7.37813	16.5344	6.60726	11.511	15.7577	7.02271	13.2602	8.35007	18.6659	20.8304	21.9581	21.1231	21.4508			18.7058	25.1534	24.0223	28.5814	27.0289	29.6921
MER97a			0.970237	1.28694	1.7578	1.87792	3.42153	1.19617	1.21401	1.22455	0.702988	1.341	1.05264	2.35078	2.68746	3.01069	2.49286	2.38797			2.36256	2.9538	2.13666	2.58293	2.41743	2.55608
MER97b			0	0	0.637785	0.414297	0.897637	0	0.855073	0.918074	0	0.823123	0	0.995006	1.08265	1.45459	1.15082	1.4204			1.04277	1.26189	1.60426	1.04205	1.2161	1.2566
MER97c			1.62139	0.931242	2.22447	1.98974	2.01242	1.22591	1.72343	2.26517	0.705707	1.79497	1.34902	3.4024	3.43664	4.0764	3.62946	3.13034			2.95698	6.05377	4.95211	4.64308	3.87268	3.39789
MER97d			0.61158	0.453277	0.855565	0.985429	2.20279	1.69813	2.85974	2.21877	2.6011	2.41756	1.98913	3.1301	3.03805	1.91312	1.46747	1.77188			3.58611	5.2842	4.68761	5.11092	5.37676	5.5065
MER99			2.46291	2.90069	4.18449	3.71927	5.02842	1.19145	3.33748	2.44694	0.636927	2.66096	1.49124	7.02668	7.86837	10.2286	8.77308	7.19072			4.46107	5.8043	4.01737	4.66034	5.51448	5.05392
MER9a1			0.951119	1.36625	2.42265	2.37773	6.99479	2.26062	3.11228	5.15501	2.0638	4.22891	2.88949	4.28956	5.9325	6.13059	5.69171	6.60899			6.88141	10.6702	7.22043	9.6143	10.3076	10.4415
MER9a2			3.52912	4.01082	6.07576	5.32104	8.87784	3.27051	5.6697	5.03809	3.08304	5.15722	4.62182	7.03043	8.82714	8.83995	6.94605	8.10151			7.89078	9.00005	6.89195	7.00523	7.39435	8.3622
MER9a3			3.02253	4.42679	6.09256	6.86735	13.3966	4.174	6.27217	9.74934	4.36933	9.76972	6.8511	17.6209	17.2106	17.6198	15.7658	16.7382			20.0172	20.423	15.8521	19.2349	17.284	21.81
MER9B			0.440006	0.480607	0	0.471682	0.586416	0	0	0	0	0	0	0	0.636369	1.17539	0.918214	1.02014			0.817138	0	0	0.47109	0.595361	0.682648
Merlin1_HS			0	0	0.668896	0.614285	1.65895	0	0.588584	0.649196	0	0.723646	0.475994	9.48125	8.72691	9.88274	9.85502	6.88259			5.4337	5.0875	6.21773	6.60024	6.89703	6.33765
MERX			1.28058	0.932892	2.87781	2.13376	3.45482	1.77758	2.98471	4.15197	2.14453	3.35353	2.89611	9.85083	8.16234	8.0023	6.46221	5.79939			5.59203	6.11882	6.63157	6.5527	7.26041	6.69968
MIR			644.315	736.42	1016.87	1222.38	2215.29	753.679	1640.29	2055.13	878.01	1829.9	1211.76	3291	3288.11	3763.05	3133.37	3192.79			2690.46	3791.32	3700.35	4140.76	4124.93	4138.97
MIR1_Amn			52.0165	69.3874	73.3978	89.6948	167.756	62.0894	136.694	157.878	77.8831	138.461	105.03	300.437	331.542	338.873	313.769	343.024			441.821	515.865	390.724	415.853	389.493	439.333
MIR3			489.486	598.492	609.833	786.976	1251.27	480.586	940.435	1072.16	510.534	936.646	652.224	2486.39	2603.72	2975.56	2697.65	2646.49			2360.69	3138.53	3007.89	3106.05	3011.48	2982.39
MIRb			826.702	987.952	1308.18	1616.06	3009.54	1001.23	2182.4	2721.83	1222.77	2438.96	1619.6	4738.51	4817.3	5582.1	4752.93	4834.89			4113.46	5448	5240.06	5860.04	5768.49	5746.83
MIRc			503.794	581.425	640.995	817.987	1347.15	504.856	989.259	1184.6	553.146	1051.35	722.267	2488.2	2600.35	3039.74	2785.42	2709.07			2309.01	3016.58	2959.76	3155.78	3147.75	3100
MLT-int			2.18112	2.82654	3.31337	3.74364	8.08345	2.40249	3.89178	3.88731	1.81963	3.17345	2.12698	10.1567	9.09571	8.80872	8.16498	8.55966			8.15351	11.8584	8.12351	9.55984	8.91408	8.35105
MLT1-int			0.595806	0.867657	1.44668	1.49459	3.25201	1.01473	3.35538	4.45448	1.55641	3.2792	1.48561	3.51025	4.22999	5.06887	3.64602	3.8252			2.65253	5.77254	5.84119	6.91186	7.3668	8.01886
MLT1A			50.625	60.4766	67.9711	85.1808	164.454	51.2241	89.3717	127.736	56.4813	106.703	69.3954	141.643	161.588	183.453	153.888	158.568			135.914	195.974	165.828	196.7	180.551	191.238
MLT1A-int			5.69249	5.69301	7.15564	7.59188	10.5979	4.45463	9.14872	8.23636	5.44179	9.14362	5.47011	12.503	8.04204	14.7389	12.7507	9.88064			8.41313	9.32611	8.67849	10.6726	11.3846	11.58
MLT1A0			95.2343	107.972	134.818	176.767	347.179	116.647	204.627	244.818	132.89	225.671	159.221	323.312	350.253	426.519	369.262	379.521			358.274	489.055	450.623	510.376	499.848	500.714
MLT1A0-int			3.97234	5.52175	5.76838	9.92234	20.3607	4.45641	10.514	11.903	5.45425	11.3823	5.54815	17.3962	14.1907	20.3546	16.2262	16.5848			11.5171	17.0281	13.0131	14.9704	15.4822	16.0878
MLT1A1			37.0377	40.5464	47.8796	58.6634	104.397	36.4794	63.0412	72.2596	35.7547	69.4327	45.0031	102.82	107.746	124.392	111.226	103.166			99.7646	136.246	116.707	128.121	128.26	134.252
MLT1A1-int			5.02946	5.05052	6.45563	9.10987	14.0743	4.88081	7.15135	8.9033	7.75959	10.2373	7.607	14.9081	18.6639	21.864	20.3167	21.3406			20.2929	24.9552	24.96	29.455	33.5874	32.8305
MLT1B			83.1444	100.807	122.77	155.776	300.947	100.28	171.234	215.195	124.848	192.832	132.271	302.966	313.787	367.537	296.107	309.677			286.12	375.764	329.762	367.363	352.741	370.135
MLT1B-int			12.1531	9.88877	13.1757	15.2257	21.4023	7.53615	14.8968	15.4902	8.39712	16.6281	10.2331	44.6977	37.4073	41.1406	38.0081	35.8006			40.1576	58.6004	58.6774	57.642	56.6878	56.2583
MLT1C			35.001	44.8059	57.7065	64.9274	137.852	44.6477	73.0392	100.632	56.1067	89.2123	59.2253	144.308	148.786	156.993	129.599	143.599			136.178	177.155	148.015	162.337	161.855	168.235
MLT1C-int			0.674047	0.873493	1.07335	0.912808	2.94468	0.660689	1.10989	1.39696	1.23662	1.30362	0.92892	2.00476	2.47318	2.51775	2.15395	2.43599			2.64729	3.66352	2.46409	3.64828	3.4976	3.82728
MLT1C2			75.9282	103.253	113.896	147.554	330.235	97.524	198.463	247.06	127.761	221.471	150.395	297.534	302.075	351.579	288.629	327.593			265.659	403.431	350.203	406.418	407.652	416.161
MLT1C2-int			2.29009	3.67464	4.80672	7.5327	19.2677	2.88147	10.3467	13.7119	5.83848	11.0695	7.39905	28.9276	31.6549	30.3117	25.9086	34.0704			32.388	51.0127	35.8013	46.2096	53.0244	51.9192
MLT1D			86.7932	113.777	145.262	177.288	356.283	131.377	243.372	273.139	152.12	261.176	177.337	360.166	313.442	403.378	329.595	354.09			327.703	480.975	461.804	493.906	480.574	480.673
MLT1D-int			3.31607	3.9039	6.70452	8.52298	15.9941	5.27512	13.5829	15.393	8.21157	14.3188	8.48132	65.9293	61.4537	82.4598	86.9381	70.4177			50.4446	55.0161	66.7827	72.1456	71.405	66.7477
MLT1E			2.15642	2.76002	3.93529	5.62114	15.118	4.34436	7.07719	10.3023	4.39646	8.4901	4.96055	10.0728	10.0962	12.4124	12.0614	13.1833			10.7823	17.9463	17.2884	19.321	17.2019	17.7275
MLT1E-int			0	0	0	0	0	0	0	0	0	0	0	0	0	0	0	0			0	0	0	0	0	0
MLT1E1			5.6187	7.37892	9.13121	10.7416	18.4306	6.29553	11.18	12.8972	6.8332	11.0578	7.29134	21.1375	22.6189	23.9847	20.7326	22.9421			18.3122	25.1693	19.6237	24.3854	27.2866	23.9699
MLT1E1-int			0	0	0	0	0	0	0	0	0	0	0	0	0	0	0	0			0	0	0	0	0.401984	0
MLT1E1A			10.8715	13.3489	18.9683	24.5873	48.4199	14.2941	24.8006	33.3067	16.6635	32.5098	20.8355	59.3939	71.2036	87.476	77.9688	74.6222			52.1639	73.5911	93.0675	95.3172	95.4569	86.0647
MLT1E1A-int			5.33642	4.27058	4.41036	4.91249	2.33229	2.44897	4.29382	3.24202	2.35574	3.14703	2.38741	6.06447	4.9594	7.37884	6.68692	5.50999			3.4219	3.12312	3.69372	3.65865	3.80515	3.35768
MLT1E2			27.1457	35.0506	38.0988	46.7417	83.6313	46.9902	77.4737	81.8213	51.1644	81.6376	60.5667	98.9182	118.926	135.501	115.141	131.152			122.189	190.987	192.925	189.632	180.11	172.233
MLT1E2-int			6.04263	6.74314	6.90674	9.80191	11.6768	4.32898	7.67314	6.70413	4.90627	7.55923	5.52121	10.1193	10.5899	15.42	12.5482	11.3875			10.737	8.81001	11.4701	13.311	11.4086	11.1499
MLT1E3			8.11852	10.0015	13.4246	15.6342	30.4381	10.6858	22.2312	25.9317	13.8369	20.6832	15.2521	64.3872	87.4397	63.9637	55.3136	64.2349			72.1551	117.926	91.0038	102.736	109.16	107.211
MLT1E3-int			2.74701	3.2595	3.21537	3.55519	4.39462	2.38813	4.68465	5.40236	2.57193	4.42355	3.02729	3.03275	2.58398	4.25388	3.03799	3.4783			2.1262	3.69509	3.51314	4.10403	4.19132	3.6736
MLT1F			44.027	65.4917	61.4529	77.6668	137.762	54.5579	98.5394	110.428	57.6049	101.033	73.443	102.394	108.043	118.924	102.881	110.716			109.788	157.926	136.255	145.871	141.312	144.828
MLT1F-int			7.2727	6.79984	12.8957	12.3289	19.7132	8.03723	18.9474	21.2491	11.926	20.0232	14.4922	19.1557	21.9154	23.7093	20.146	20.394			18.9686	28.5794	25.5893	30.1679	33.9998	32.0051
MLT1F1			16.7072	19.9297	24.3858	29.4636	63.5639	22.5481	40.2582	53.4418	25.9751	49.0308	32.2083	86.0524	76.2606	94.3601	83.1308	78.7068			73.9253	98.0341	91.7376	98.995	94.1947	95.8267
MLT1F1-int			2.1517	2.81909	4.96228	7.39492	10.3318	4.35567	10.6793	9.55501	3.92375	8.07557	4.46066	12.4671	15.0456	19.2486	15.0233	13.5618			14.1945	31.7465	32.3573	37.974	31.9036	28.5233
MLT1F2			48.2756	50.4904	58.698	80.7975	133.318	50.2904	91.3615	97.429	51.2241	92.2037	64.4225	128.4	139.209	167.838	140.988	138.598			127.298	172.131	147.223	162.144	158.589	163.192
MLT1F2-int			10.3734	11.0833	14.7229	13.9906	18.0273	7.20381	10.4117	9.62868	6.91042	10.7873	7.23179	26.7796	20.7964	25.0925	24.9287	20.0504			16.1585	16.8383	14.7493	17.6758	16.1693	15.1105
MLT1G			14.3632	19.9361	23.6133	28.4978	51.133	22.7901	39.8149	44.6107	25.0369	40.7921	31.2843	43.7922	41.6791	52.6424	44.2896	47.6209			37.6525	52.7128	51.4479	58.7677	55.2376	54.4872
MLT1G-int			2.41746	2.75048	4.91032	6.68784	10.3219	3.65622	10.104	9.41372	3.67882	7.69498	3.91186	24.0058	14.9709	21.8479	20.1739	16.0263			15.5212	22.8075	24.7654	29.7464	22.1506	22.8209
MLT1G1			21.3056	25.5295	28.9072	37.1871	76.3384	24.2605	37.0819	48.4392	31.5052	46.457	31.6585	49.0113	52.5711	68.8163	57.6376	63.7567			60.0629	77.8286	60.8867	68.7893	64.6377	69.293
MLT1G1-int			6.9489	7.84499	5.14895	8.67496	8.51365	2.48561	3.17172	4.84085	2.55789	4.54553	3.2598	6.36134	8.00409	12.8348	12.5423	12.0857			7.10444	4.95133	5.33936	5.61557	5.96522	5.98907
MLT1G3			12.4709	19.1582	20.9996	26.7833	54.2423	17.4995	37.2997	45.3491	21.8298	42.2781	29.0745	46.4212	44.93	57.411	45.4684	52.2555			45.5999	69.6387	65.909	74.2841	70.4931	72.5065
MLT1G3-int			2.12461	1.37103	3.03337	2.90828	6.93831	1.57441	3.98864	4.97506	4.23175	5.72153	3.94829	7.37065	5.1428	5.55284	4.36085	4.35479			3.32677	5.37892	5.45972	5.69335	5.63141	5.69736
MLT1H			42.3562	57.2293	63.2151	83.7438	177.333	63.5518	113.383	124.154	73.1838	117.099	83.9698	179.389	172.881	213.008	185.911	194.709			176.52	215.36	203.029	225.208	218.995	223.624
MLT1H-int			4.21725	6.12146	5.5534	9.29324	14.6657	6.45924	10.1471	12.1086	7.96171	12.4879	8.19827	18.7326	20.7802	23.359	21.9023	22.2419			25.9115	32.4583	29.3352	42.828	38.1509	35.2898
MLT1H1			16.4449	20.0076	22.2739	32.3562	67.0463	24.2579	41.5007	48.6869	27.2915	47.3426	32.5157	49.5601	54.6645	69.2481	57.8399	57.6189			55.0288	84.043	71.8282	80.7243	78.3902	84.7067
MLT1H1-int			1.66291	2.24105	1.81473	4.02972	9.86867	2.28548	6.20789	5.90077	3.88644	7.11596	3.23795	5.22902	5.45797	7.47058	5.99462	6.59409			6.67432	8.82134	10.3	8.81041	7.28833	6.76714
MLT1H2			13.1693	18.5057	20.0268	29.0089	56.8655	17.1019	36.0942	44.7294	24.9865	44.2449	28.5906	53.0789	50.8292	71.5309	61.9621	57.5109			45.1749	63.955	63.2592	71.1628	67.5644	69.7984
MLT1H2-int			0.986986	0.918378	2.0378	3.40046	6.59912	1.59918	3.25702	4.12404	2.36799	4.11319	2.78401	8.07352	5.56797	7.88282	7.26813	6.15108			5.07173	4.81638	6.70224	7.9049	6.90527	6.61593
MLT1I			35.0211	47.6744	55.5638	77.2448	141.449	45.7268	79.3881	101.256	54.0412	95.8657	67.3217	130.747	125.504	167.394	135.351	138.911			125.917	165.727	160.23	172.632	161.994	167.614
MLT1I-int			2.17492	1.44673	4.5485	4.28525	9.94929	2.59841	4.68846	6.11257	2.87692	5.02913	3.17502	11.8682	12.506	14.5394	11.168	11.5148			13.0429	17.2785	15.1523	15.3324	16.3833	16.056
MLT1J			101.393	113.13	127.467	163.409	262.247	104.895	186.314	217.984	116.209	208.398	146.955	316.12	328.457	426.041	365.306	359.971			305.498	431.167	422.67	437.509	437.51	438.023
MLT1J-int			7.33823	8.27844	8.6801	12.9274	23.045	6.58867	9.81389	11.3152	6.02287	11.7493	7.78093	21.863	21.6618	28.9532	23.868	22.1268			20.3891	19.8209	23.2573	25.8316	23.6757	23.4435
MLT1J1			22.5373	25.0587	26.1881	35.8899	56.887	26.4898	51.2843	51.3901	46.2745	48.75	37.8968	48.417	51.8275	67.9453	56.2642	60.443			57.4663	80.7793	67.295	70.6804	77.9609	74.4875
MLT1J1-int			7.98107	11.4418	11.1223	15.4324	21.4191	24.0504	26.9314	30.383	39.1249	34.8864	31.8237	12.4581	17.362	24.1247	25.0681	25.0599			25.6279	40.1783	41.0297	38.449	47.0538	45.7374
MLT1J2			28.8442	31.9884	37.1947	49.3492	82.4387	33.9041	62.0751	74.2037	44.8974	67.7821	51.1548	82.0734	75.5251	99.2465	85.8797	86.0448			75.066	150.483	144.723	136.839	146.057	136.938
MLT1J2-int			2.41507	3.96405	4.8005	7.59624	14.7433	5.75292	46.422	38.2072	16.6292	26.8486	25.4081	10.6826	15.7801	20.9648	17.8594	15.3952			12.5996	52.2536	41.8959	71.9295	63.3609	50.8919
[truncated: 195 more rows]
