# Supplementary material for: Transposable elements and their KZFP controllers are drivers of transcriptional innovation in the developing human brain
Source: HighWire-hosted journal article supplement (doi:10.1101/gr.275133.120), 2021-08-16
Supplement: Supplemental_Table_S5.xlsx [file Supplemental_Table_S5.xlsx]

## Sheet: Legend
Supplemental Table S5 – TE subfamily expression values in counts per million (CPM) from Brainspan (BS) for all brain regions excluding DFC and CB (see Supplemental Table S4).

## Sheet: cpm_Amygdala.xls
TE.subfam	mean.2A	mean.2B	mean.3A	mean.3B	mean.4	mean.5	mean.6	mean.7	mean.8	mean.9	mean.10	mean.11
Alu	6.11439	9.53463	10.6284	21.4152	9.61799	25.7279	21.4177	10.1148	17.2843	11.0159	21.32	15.3336
AluJb	670.978	973.969	1042.84	1966.04	905.501	2312.89	1822.46	977.384	1353.99	888.874	1816.38	1357.09
AluJo	222.823	334.185	368.195	698.241	331.502	798.523	658.922	364.852	452.167	332.116	672.411	481.394
AluJr	592.112	847.771	969.365	1869.8	853.314	1972.44	1717.33	941.143	1222.69	844.706	1731.29	1264.35
AluJr4	62.6106	85.803	94.3502	184.291	79.324	179.791	147.737	86.8585	100.076	83.6467	158.176	104.575
AluSc	200.752	322.996	300.863	505.553	264.511	841.997	601.94	312.057	532.518	306.488	518.687	413.878
AluSc5	19.3199	31.2232	29.6178	53.7873	24.6805	85.2374	61.8233	34.5781	35.4248	25.4647	57.7086	45.7523
AluSc8	113.017	183.802	170.632	295.106	145.405	493.416	340.113	167.406	220.021	159.46	274.502	221.495
AluSg	256.645	421.159	407.633	689.906	348.327	1155.73	789.328	401.704	463.926	396.4	661.629	539.279
AluSg4	62.0562	99.2083	91.8391	168.741	83.5207	259.307	179.83	92.1873	118.419	81.4772	149.298	118.458
AluSg7	31.2916	52.7388	46.2915	78.8432	41.8683	143.937	107.849	54.1879	105.485	54.9279	88.2307	73.7965
AluSp	394.177	625.588	609.316	1003.65	526.9	1804.87	1193.84	602.161	778.002	570.779	1024.98	799.121
AluSq	65.7143	115.283	108.618	185.122	98.4488	324.929	210.127	104.136	143.431	101.898	181.437	156.918
AluSq10	10.903	14.3863	14.2568	21.4961	12.2912	32.8787	20.6208	11.7081	12.6139	8.31771	16.3983	12.4813
AluSq2	280.98	459.088	444.825	731.135	394.97	1219.25	861.263	447.12	535.215	452.361	768.397	585.488
AluSq4	5.40075	9.02249	10.1555	20.0719	8.27724	35.9118	23.3172	10.5352	18.1672	9.95277	18.8868	15.223
AluSx	743.129	1125.72	1119.06	1872.65	945.263	3208.29	2216.62	1149.21	1368.82	1159.27	1830.1	1497.41
AluSx1	642.671	1063.03	980.959	1636.48	883.448	2617.81	1873.04	906.326	1121.38	855.465	1530.67	1218.65
AluSx3	150.697	260.094	262.264	497.522	228.202	752.171	536.872	270.523	353.733	253.754	462.463	357.497
AluSx4	67.0263	101.71	97.8879	160.967	81.4595	281.787	188.989	100.348	123.199	102.254	177.946	132.266
AluSz	611.439	978.498	985.554	1783.25	843.503	2803.58	2015.06	1025.43	1209.55	939.449	1834.84	1401.04
AluSz6	228.579	355.744	353.69	662.218	312.477	935.173	665.375	357.967	435.421	306.137	637.753	459.203
AluY	428.68	714.868	635.054	1054.66	534.698	1998.55	1376.87	686.583	1130.77	695.627	1064.8	868.36
AluYa5	8.60507	15.5601	11.7376	18.2888	10.2037	38.0922	31.8771	14.6857	40.1469	16.274	21.769	17.1906
AluYa8	0.481112	0.707089	0.678584	2.05773	0.617452	2.29713	1.44822	0.747636	2.1713	0.819671	1.16716	1.02135
AluYb8	6.10073	8.95293	7.39771	11.7948	5.94145	26.5145	19.2505	10.9475	24.8317	9.86472	13.3509	11.0773
AluYb9	0.787167	1.14266	0.841357	2.46907	0.735048	3.55114	2.24091	0.955905	3.10472	1.36332	1.43763	1.32986
AluYc	17.7158	31.1729	25.4694	46.2592	22.4623	89.3811	60.9708	33.5749	50.1283	31.1042	52.0779	40.497
AluYc3	2.87139	4.38287	4.23422	7.81373	3.05637	14.0786	9.20946	3.96323	10.0842	4.82121	6.91607	5.33219
AluYd8	0.453555	0.845124	0.453417	0.76618	0	2.89045	2.42812	1.75389	4.33316	1.55927	1.16475	1.35886
AluYe5	3.07178	5.56534	5.05118	10.2539	3.68323	19.8369	13.8872	6.90533	9.69364	6.69891	10.5041	8.00367
AluYe6	0.712049	0.979923	0.901284	1.45209	0.877265	4.50389	2.78437	0.92539	1.79238	1.10251	1.6536	1.17284
AluYf1	8.89377	16.136	14.3001	24.5994	12.0628	36.0089	26.718	13.7531	21.0702	12.709	22.2461	16.5834
AluYg6	4.41745	5.8931	5.95723	8.56613	4.439	7.21358	6.79339	4.69065	5.82218	4.80195	4.39289	3.97373
AluYh3	1.34684	2.8471	2.65185	4.90542	2.60887	9.05547	6.11985	3.8343	3.52865	2.87314	4.96354	3.87008
AluYh3a3	0	0.594551	0.879582	1.99469	0.737812	1.68666	1.9506	1.05203	1.70015	0.777039	1.89798	1.54621
AluYh7	0.931401	1.16039	1.72563	3.63729	1.78384	5.92359	4.0637	1.68905	3.61588	1.65697	2.66078	2.5991
AluYh9	0	0	0	0.637335	0	0.849395	0.472466	0.46155	0.516713	0	0.506833	0
AluYi6	1.71695	2.5671	1.91964	2.62375	1.81438	4.6177	3.19141	1.99497	4.13259	2.37786	2.1918	2.09798
AluYi6_4d	0	0	0	0	0	0.445619	0	0	0	0	0	0
AluYj4	11.7209	17.8582	16.9993	27.7809	14.8264	49.0833	36.3081	15.3582	28.442	15.9358	25.9054	21.5092
AluYk11	0.628752	0.728626	0.705526	1.17235	0	1.272	1.34174	0.942173	1.69737	0.544943	0.879643	1.03072
AluYk12	0	0	0	0	0	0.493737	0	0	0.446151	0.504202	0	0
AluYk2	31.4155	51.31	47.3598	74.3236	38.7597	138.258	98.2908	55.1347	75.5062	59.3911	87.6265	73.7208
AluYk3	26.7533	47.337	45.347	66.8927	41.0356	119.246	81.9393	39.1353	60.6182	37.6071	62.3698	49.0532
AluYk4	5.56215	7.4667	7.5932	11.8996	6.55122	18.6394	13.9275	8.29685	14.4002	7.24421	10.5129	9.0684
AluYm1	21.566	35.0645	30.5449	48.7424	26.8549	99.1717	65.0366	32.5374	45.0557	34.8793	51.6995	39.9472
AmnSINE1	6.12952	8.17488	8.20656	14.4017	7.32121	14.7678	14.2413	10.9742	10.0987	9.15126	18.237	12.9069
AmnSINE2	1.87899	3.11424	2.66121	5.66712	3.47062	4.91645	4.31358	2.95621	2.91693	3.04731	4.69072	3.62742
Arthur1	1.92298	3.91234	4.40998	7.73415	4.2196	8.38935	9.85315	8.90678	10.417	11.255	14.88	10.8035
Arthur1A	2.08915	2.56324	2.97957	6.36302	2.80234	4.5064	5.63848	2.72696	4.04203	4.50886	5.29157	4.05202
Arthur1B	4.20728	6.41935	6.5967	10.9029	8.22211	10.4605	13.8519	8.58598	14.593	10.599	15.2239	12.4652
Arthur1C	0.530331	1.65356	2.22016	4.08239	3.35471	4.12145	3.09462	2.0026	3.63921	2.43236	3.9742	2.54663
Arthur2	2.35008	2.99969	3.70963	7.23496	3.02238	3.83609	5.58588	3.41357	3.26362	5.04712	6.76556	4.05897
BLACKJACK	2.30747	3.91078	3.90035	11.2826	3.44748	8.93329	8.0684	5.1686	9.69531	7.69736	9.07565	6.59804
CR1-11_Crp	0	0	0	0	0	0	0	0	0	0	0	0
CR1-12_AMi	1.41424	1.5985	1.38011	2.60102	1.35052	1.52724	2.24928	1.43043	2.528	1.82517	2.82989	1.48449
CR1-13_AMi	0	0	0	0.844039	0	0	0	0	0	0	0.50343	0
CR1-16_AMi	0	0.60801	0.507418	1.73975	0.472729	1.35987	1.34154	0.667532	1.52791	1.04504	1.99071	1.35134
CR1-1_Amn	0	0	0	0	0	0	0	0	0	0	0	0
CR1-3_Croc	1.45384	2.53088	2.98548	7.29766	3.19154	6.5621	6.65945	5.5119	4.58374	7.06188	9.37164	5.54846
CR1-8_Crp	0	0	0	0	0	0	0	0	0	0	0	0
CR1-L3A_Croc	0.845713	1.57283	1.79656	3.22113	1.34247	2.32224	2.97501	2.07888	1.9724	1.72037	2.92458	2.32743
CR1-L3B_Croc	0	0	0	0	0	0	0	0	0	0	0	0
CR1_Mam	5.54735	8.64281	6.40445	15.809	6.49292	16.6737	15.242	8.06798	8.52854	10.1896	17.4146	9.90239
CRP1	0	0	0	0	0	0	0	0	0	0	0	0
Chap1_Mam	0.799648	1.13328	1.33099	3.18668	1.23518	2.59421	3.08411	1.77373	2.41688	2.6512	4.96902	2.93531
Chap1a_Mam	3.08203	5.48209	5.20614	9.64822	4.88196	8.69856	9.60855	6.71308	15.3903	5.93225	12.0266	8.45212
Charlie1	13.7464	25.5664	22.6485	39.4059	22.5374	29.1363	28.1321	19.9268	31.8073	24.2829	38.4312	28.1858
Charlie10	4.63691	10.4146	11.1019	19.9179	11.833	8.97555	10.837	9.74596	19.5851	11.7196	16.0414	11.1273
Charlie10a	0.696819	1.16553	1.05843	2.58379	1.2973	2.65697	1.74243	1.20156	1.08343	0.522606	2.26442	1.83656
Charlie10b	0.719471	0.799373	0.980157	2.66992	1.04166	3.36829	1.98373	0.934544	0.805627	1.21705	2.06886	1.78456
Charlie11	0	0.455862	0	0.844039	0	0.774079	0.680613	0	0	0.52118	0.694932	0.481249
Charlie12	2.08657	4.89435	3.75096	5.08146	4.96231	2.11303	2.68115	2.80363	4.30594	3.52297	3.27679	2.60268
Charlie13a	1.33141	3.34415	3.96187	8.13205	2.94799	5.33487	5.47434	3.10879	4.86154	3.6304	8.20095	4.45292
Charlie13b	0.819333	1.12588	1.41657	5.56377	1.55682	2.23855	2.17904	1.46857	2.13908	1.73095	3.68878	2.27674
Charlie14a	0	0.708587	0.650218	2.46321	0.861602	1.69461	2.07629	0.972308	1.86128	0.938347	2.1495	1.2304
Charlie15a	15.695	20.3467	20.8497	33.0371	17.0415	25.3752	35.514	30.5024	21.8986	34.712	43.5376	37.2806
Charlie15b	9.11246	13.5264	11.0225	19.7574	10.7161	23.4107	27.3029	23.9358	41.4204	23.5992	43.6963	31.692
Charlie16	3.9524	5.96941	6.5634	12.5366	6.53275	7.86214	7.71957	6.36253	7.72013	8.44178	11.556	7.11058
Charlie16a	3.47848	5.40807	6.32059	12.0291	5.10785	15.318	15.0392	11.5098	8.32018	12.4226	17.1588	12.3916
Charlie17	6.55989	7.71342	8.83952	12.6261	7.94261	5.41856	5.36289	4.40571	3.25029	4.21528	6.11117	4.74244
Charlie17a	2.31065	3.92971	4.30981	10.5935	3.93937	11.2346	9.29748	8.7542	5.91719	7.71464	13.8488	9.44565
Charlie17b	3.45122	4.25553	3.81998	4.73695	3.98399	4.87461	5.02796	5.62596	4.25038	4.06689	5.68331	6.47188
Charlie18a	7.20867	13.9226	15.0977	23.857	13.9821	15.1519	22.734	16.831	22.6742	20.7965	27.156	17.0679
Charlie19a	4.91388	7.12226	7.37908	15.5572	7.1182	18.7591	16.5127	11.6356	10.0042	10.1654	18.0201	11.3522
Charlie1a	20.9189	39.703	40.8699	96.6493	37.2577	73.5505	64.6852	41.5407	62.08	45.2086	83.5348	54.3027
Charlie1b	7.43448	12.1056	11.4345	28.5833	10.7454	18.4231	18.9316	10.2922	14.5396	12.4708	21.697	14.363
Charlie20a	3.37107	4.55942	5.03286	8.90547	4.4279	6.71566	6.61798	5.43562	5.91719	6.01892	9.77489	6.68436
Charlie21a	1.33641	2.54398	2.78665	8.25091	2.54092	4.6654	4.86288	2.87992	5.41659	3.92514	6.43412	3.72782
Charlie22a	1.73237	2.56137	3.36775	8.12723	2.3952	5.90643	6.70868	3.08934	4.0837	4.37931	8.83361	5.55935
Charlie23a	2.4633	3.69323	4.17574	8.79282	3.75	7.68096	7.94492	4.84056	8.46186	5.29892	11.2896	6.52898
Charlie24	4.86359	6.4299	6.20735	10.9208	4.26819	8.81446	8.95486	6.11612	6.30612	5.99379	10.0686	6.69521
Charlie25	2.15503	3.56694	3.33885	7.48128	3.49945	4.20513	4.67878	3.14694	5.25047	4.40983	6.74238	4.02692
Charlie26a	0.660353	1.08206	1.44989	2.63547	1.14332	1.82013	2.24703	1.85002	1.86128	2.31831	2.64479	1.64458
Charlie29a	2.5243	5.09995	4.87883	11.6098	5.05808	8.93329	7.312	4.44385	6.41724	5.11958	8.8791	5.8194
Charlie29b	1.73077	3.0196	4.87038	8.68981	3.90844	7.30689	6.87007	3.11108	4.01313	4.0788	7.91635	5.66195
Charlie2a	16.542	21.1151	18.4813	25.0824	16.7872	16.1301	16.8728	11.2145	14.7685	12.7413	19.2768	12.9427
Charlie2b	11.1135	19.2637	16.5584	26.682	14.7544	19.9378	18.4942	11.2336	17.6771	15.1609	24.0117	15.4188
Charlie3	1.72594	2.27944	2.93409	5.90827	2.52957	6.92487	6.15869	3.33766	2.75024	3.39573	6.91913	4.45254
Charlie30a	0.967363	1.98674	1.85218	3.60008	1.80776	5.87882	7.15099	6.12222	12.8623	10.9561	12.5782	9.24312
Charlie30b	2.17112	3.10801	2.75285	6.36233	2.46878	3.99592	4.55869	2.51106	3.11139	2.58042	5.42063	3.84957
Charlie31a	1.73026	2.89455	2.42608	4.55781	2.53945	4.7177	4.08314	3.10879	2.75024	6.28427	7.31715	4.22501
Charlie32a	0.568494	0.786719	0.777234	1.32635	0.82574	0.899606	0.857407	0.705676	0.861188	1.03515	1.57143	1.11302
Charlie4	2.16506	3.52851	3.65424	6.64276	3.8006	6.07422	5.61868	3.42005	3.22251	3.05739	7.07098	4.16708
Charlie4a	7.99199	11.7917	13.1033	27.0609	12.6	21.573	20.8528	12.5622	25.2061	16.2464	29.4195	21.8979
Charlie4z	29.5237	38.0058	40.0485	64.3592	34.6656	51.1118	49.7835	37.4447	28.1881	36.9692	63.6584	43.8221
Charlie5	13.5559	33.1876	28.4245	47.3178	33.0914	45.4305	47.9011	57.8754	261.69	93.4317	114.022	103.396
Charlie6	0.626756	1.32316	1.04496	3.39338	1.64767	1.31803	1.56262	1.01083	1.30567	0.566989	1.84092	1.09823
Charlie7	5.90603	10.7678	10.7593	23.2197	11.5076	17.7201	20.2732	12.8738	21.3908	15.4855	25.7425	17.2722
Charlie7a	0.925926	2.37482	2.53946	5.39151	2.16653	3.41013	4.97865	2.72734	5.02823	4.75237	7.7369	3.79495
Charlie7b_Mars	0	0	0	0	0	0	0	0	0	0	0	0
Charlie8	19.1469	25.1969	29.6161	61.4288	27.5124	45.1075	41.6211	27.6164	30.9283	30.1901	49.9591	37.1317
Charlie9	2.95332	5.6511	4.82676	9.50835	6.42411	9.62327	16.4341	7.05676	8.52909	7.67994	13.4794	10.553
Cheshire	16.7758	37.1181	23.1873	37.4987	32.0354	24.7919	26.4043	24.3935	33.253	34.629	39.4702	27.8502
Chompy-6_Croc	0	0	0	0	0	0	0	0	0	0	0	0
Chompy-7_Croc	0	0	0	0	0	0	0	0	0	0	0	0
DNA1_Mam	0	0	0	1.18854	0	0.899606	0.782551	0.400519	0.638946	0	1.16059	0.582341
ERV24B_Prim-int	1.31711	1.91	1.50325	4.28909	1.73526	4.41476	3.97302	2.6892	4.23149	3.57536	4.6594	3.97424
ERV24_Prim-int	0.785068	1.05894	1.72265	3.50776	1.71545	4.16329	2.35903	1.92631	2.99082	2.76148	4.77624	2.90887
ERV3-16A3_I-int	16.7533	20.3519	28.6467	48.7065	27.2823	58.4534	51.4742	37.928	24.7794	38.0284	65.3061	51.0058
ERV3-16A3_LTR	0.97877	1.6887	2.33641	5.49486	2.35291	7.92908	5.79768	3.56653	2.69468	3.17226	6.74565	4.49789
ERVL-B4-int	46.6487	48.8346	56.2699	79.3796	55.8434	46.6427	58.2476	48.2858	30.4927	44.0478	69.4314	55.3752
ERVL-E-int	28.5262	38.9249	51.2318	95.1077	48.4172	69.1479	66.3996	46.8638	37.9812	43.233	80.6794	58.112
ERVL-int	3.62325	4.94459	8.3137	13.8502	4.92961	9.52745	8.7506	6.59903	2.80581	5.56153	11.6631	6.09016
ERVL47-int	0	0.509333	0.797	2.29096	0.683278	1.82013	1.77082	0.781966	1.194	1.84595	2.34448	1.37844
EUTREP15	0	0	0	0.568434	0	0.774079	0.696033	0	0	0.99972	1.03952	1.12001
EUTREP16	0.876676	1.25549	1.15968	2.04981	1.58001	1.56908	2.17986	2.11703	2.30576	1.02438	2.82198	2.16739
EUTREP4	0.409579	0.596248	0.626105	0.740687	1.13741	1.35987	2.08807	2.38404	1.41679	1.64756	2.69366	1.40434
EUTREP7	0.470967	0.590586	0.868025	1.4297	0.548967	1.15066	1.04349	0.743821	0.583385	1.21174	1.31571	0.817928
EUTREP8	0.595254	0.73321	0.901509	2.32541	1.06159	2.65697	2.57319	1.04898	1.33345	0.743097	2.40809	1.90572
Eulor1	0	0	0	0	0	0	0	0	0	0	0	0
Eulor10	0	0	0	0	0	0.439342	0	0	0	0	0	0
Eulor11	0	0	0	0	0	0	0	0	0.416704	0	0	0
Eulor12	0	0	0	0	0	0.523027	0	0	0	0	0	0
Eulor2A	0	0	0	0	0	0	0	0	0	0	0	0
Eulor2B	0	0	0	0.637335	0	0	0	0	0	0	0	0
Eulor2C	0	0	0	0	0	0	0	0.514953	0	0.909909	0	0
Eulor3	0	0	0	0	0	0	0	0	0	0	0	0
Eulor5A	0	0	0	0	0	0.439342	0.753872	0.743821	0.638946	0	1.09975	0.600088
Eulor5B	0	0	0	0	0	0	0	0	0	0	0	0
Eulor6A	0	0	0	0	0	0	0	0	0	0	0	0
Eulor6B	0	0	0	0	0	0	0	0	0	0	0	0
Eulor6C	0	0	0	0	0	0	0	0	0	0	0	0
Eulor6D	0	0	0	0	0	0	0	0	0	0	0	0
Eulor6E	0	0	0	0	0	0	0	0	0	0	0	0
Eulor7	0	0	0	0	0	0	0	0	0	0	0	0
Eulor8	0	0	0	0	0	0.606711	0.497575	0	0.416704	0	0.452033	0
Eulor9A	0	0	0	0.465083	0	0.732237	0.500276	0.438664	0	0.424185	0.679136	0
Eulor9B	0	0	0	0	0	0	0	0	0	0	0	0
Eulor9C	0	0	0	0.430632	0	0.564869	0	0	0	0	0.40692	0
EutTc1-N1	0	0	0	0.430632	0	0	0	0	0	0	0.426733	0
EutTc1-N2	0	0	0	0.602885	0	0	0.690579	0.553098	0.694506	0.86056	1.13842	0.728589
EuthAT-2	3.03942	5.3318	5.12419	7.9753	4.60712	6.90395	10.528	5.77892	13.6957	9.82728	12.6996	8.61051
EuthAT-N1	0	0	0	0	0	0	0	0	0	0	0	0
EuthAT-N1a	0.407613	0.544068	0	0	0	0	0.516949	0	0	0.577047	0.639448	0.587266
Eutr10	2.30455	3.3669	4.0799	5.83937	3.80768	5.62777	6.55717	5.35933	2.69468	6.95257	7.79584	5.9236
Eutr11	1.97749	3.24877	3.52095	8.11311	4.43683	3.24276	5.35312	3.2423	6.08387	4.63057	6.52378	4.81954
Eutr15	0	0.47091	0.476865	1.08519	0.480038	1.52724	1.14811	0.629387	1.52791	1.61362	1.6071	1.16329
Eutr16	0.789901	0.936882	1.61429	2.60102	1.01753	2.61513	2.65541	1.65929	1.27234	2.28886	2.95452	2.2238
Eutr18	1.19037	2.10054	2.70625	5.88519	2.21217	6.5621	6.21365	4.06241	2.75024	3.15243	6.47325	5.39021
Eutr2	0	0.517438	0.678224	1.02766	0.532395	1.26238	0.913692	0.629387	0.583385	0.972379	0.834061	0.490931
Eutr2B	0	0.53316	0.687546	2.2448	1.0491	2.08541	2.19772	1.12527	1.13843	1.68391	2.7778	1.93598
Eutr5	0.528323	1.06293	1.87305	2.60067	1.22194	2.02934	1.92649	2.0026	1.63903	1.73823	2.4817	1.65739
FAM	37.1921	31.4143	35.0591	60.3694	29.2665	46.5117	45.4138	29.5503	34.018	26.8138	49.7703	35.0433
FLAM_A	45.9966	60.399	68.9827	132.421	60.8468	112.316	106.882	64.6621	84.098	62.6983	118.982	79.9777
FLAM_C	77.4695	110.938	116.018	226.202	106.992	205.858	190.141	111.275	164.38	103.083	203.943	139.486
FRAM	61.2502	83.2154	102.449	203.763	85.2542	198.232	184.798	100.039	131.602	103.194	186.326	132.464
FordPrefect	2.0957	2.78538	3.1106	7.6308	3.32526	3.45198	3.85313	3.0325	1.36123	3.27147	4.75185	3.51999
FordPrefect_a	0.509357	0.734782	0.927394	1.8431	1.01827	1.9875	1.68098	0.591242	0.861188	1.07165	1.18173	1.05155
HAL1	109.754	154.102	165.863	310.063	145.126	287.146	265.908	161.001	219.457	205.952	357.058	203.148
HAL1M8	13.1346	24.2393	23.8088	35.7428	20.8673	28.5987	31.7907	26.7585	18.0294	32.4557	49.423	29.1293
HAL1ME	18.3695	30.555	28.4893	58.9098	26.7747	44.0882	48.906	32.0095	56.495	42.3291	64.9244	39.3695
HAL1b	7.48252	13.1195	14.9384	31.0847	14.445	23.6052	26.707	18.4243	25.9356	20.9788	35.4397	22.2896
HERV-Fc1-int	9.10134	9.28923	19.9104	15.5834	11.8451	5.89974	13.2122	9.34888	2.23131	4.82448	11.8328	6.57923
HERV-Fc1_LTR1	0	0	0.414762	0	0	0	0	0.648459	0	0	0	0
HERV-Fc1_LTR2	0	0	0	0	0	0	0	0	0	0	0	0
HERV-Fc1_LTR3	0	0	0	0	0	0	0	0	0	0	0	0
HERV-Fc2-int	0	0	0.71541	0.91294	0.460566	0.502106	0.716555	0	0	0.992883	0.679226	0
HERV-Fc2_LTR	0	0	0	0	0	0	0	0	0	0	0	0
HERV15-int	0.747891	1.1286	1.28573	2.46321	1.92037	3.59424	3.48866	1.96445	1.49458	1.15183	2.92229	2.92617
HERV16-int	11.0348	9.60896	12.3161	18.6836	9.17566	14.4979	15.4261	10.6042	10.0842	10.0496	16.495	12.1532
HERV17-int	7.21483	8.43219	8.77393	18.4548	9.19916	31.2293	23.9013	15.5863	11.4982	14.0398	23.2013	16.0872
HERV1_I-int	0.886395	1.25426	3.7803	7.45855	3.49301	3.45198	2.71817	2.0026	4.94488	0.876553	2.62063	2.38649
HERV1_LTRa	0.53705	0.590942	0.816643	0.844039	0.49913	0.732237	0.851326	0.438664	0.916748	0	0.554913	0
HERV1_LTRb	0	0	0	0	0	0	0	0	0	0	0	0
HERV1_LTRc	0	0.572006	0	1.5675	0.703824	0.774079	1.19739	0.514953	0.527825	0	0.995434	0.713702
HERV1_LTRd	0	0	0	0.499533	0.412758	0.98329	0.770056	0	0.583385	0	0.562044	0.608567
HERV1_LTRe	0	0	0	0	0	0	0	0	0	0	0	0
HERV3-int	4.78623	6.15531	9.26799	17.8161	7.33278	18.8984	13.4372	7.38099	5.19491	4.32617	13.8502	9.34454
HERV30-int	0	0.534509	0.558843	1.01629	0.456775	2.57329	1.6609	0.877327	0.916748	0	2.19329	1.19719
HERV35I-int	1.83242	2.45181	2.93992	6.32168	2.54341	6.05288	4.22883	1.90723	2.1113	3.79478	5.13983	2.66101
HERV4_I-int	5.76417	7.04772	9.88369	24.2525	9.91671	18.4942	15.8901	9.20355	10.3309	11.7291	17.3017	14.3314
HERV9-int	4.06976	4.08392	6.08919	9.72436	4.81779	15.4452	12.4525	7.7838	6.22611	9.60764	16.8729	10.0813
HERV9N-int	4.62567	4.10625	5.04876	10.4048	3.97817	10.5568	7.4262	4.85391	3.38363	4.80848	9.14682	5.88079
HERV9NC-int	2.19487	3.60548	3.80392	10.6638	4.24361	19.6922	12.0727	6.09399	4.69486	9.15893	10.8702	9.04765
HERVE-int	14.2582	15.9222	21.185	33.9662	15.5884	33.7273	38.6577	35.5913	12.2889	20.235	33.2837	31.1341
HERVE_a-int	10.5014	14.3316	13.6565	20.536	14.8284	11.2961	11.0985	8.6104	8.20351	9.63209	12.0056	9.53419
HERVFH19-int	0	0.435401	0.503717	2.18761	0	1.94566	3.40936	1.50671	1.47235	1.11415	3.68377	1.83824
HERVFH21-int	1.75252	4.01781	3.90597	8.45761	4.005	9.35172	12.8167	4.06241	5.41715	6.19906	8.21202	5.88601
HERVH-int	38.443	87.9814	133.729	251.92	104.64	302.716	496.632	239.476	216.937	264.61	456.394	291.713
HERVH48-int	7.06768	9.61569	16.0855	33.2217	10.633	32.1975	38.6679	17.0316	14.5846	11.7878	34.6137	22.2258
HERVI-int	2.12331	2.609	3.66244	5.37877	3.17442	4.79176	4.4176	3.39945	3.06249	3.09007	4.26233	2.91365
HERVIP10B3-int	8.19718	9.59821	13.5939	23.7681	10.7407	20.6595	16.8085	9.57317	7.10063	9.25806	17.4959	12.3024
HERVIP10F-int	5.24372	8.22297	11.5744	21.9502	11.3673	11.5405	12.9708	9.01587	4.56041	11.5082	14.017	9.095
HERVIP10FH-int	3.00063	5.6448	6.12437	11.7197	4.70005	16.346	13.0279	7.57744	11.196	9.8056	17.2634	9.71548
HERVK-int	17.9315	25.0452	30.0026	57.7898	33.8028	71.3555	64.843	38.3812	83.0818	51.3517	74.3836	61.2201
HERVK11-int	6.231	7.77783	10.0139	17.8885	10.6911	22.0165	22.2151	10.9807	12.7522	13.1479	20.8524	17.4338
HERVK11D-int	1.15638	0.918016	0.658611	1.26055	1.35304	2.6507	2.98139	1.1081	0.977865	0.676671	1.96205	1.46861
HERVK13-int	11.7072	11.2891	12.8076	20.4571	12.685	29.4736	13.2805	8.50893	11.726	8.85452	10.8277	15.5595
HERVK14-int	7.92699	13.2977	20.361	32.0686	19.9124	18.0582	17.6597	12.3207	11.3899	13.0178	16.5935	14.8198
HERVK14C-int	2.18207	2.89859	2.64751	5.03082	4.09746	4.06622	3.48961	2.18683	2.49022	2.68187	4.35227	3.19293
HERVK22-int	3.31544	4.31323	6.37652	12.7467	5.64853	13.1803	11.8398	6.31294	5.02823	6.86643	13.7933	8.27376
HERVK3-int	12.7814	16.0047	25.172	42.8289	22.0469	28.5782	27.3128	18.9957	15.1402	17.0455	29.2321	24.4199
HERVK9-int	17.9327	21.4798	25.3278	54.6107	23.9362	57.1421	45.8133	31.7017	41.5376	27.1547	44.4364	42.238
HERVKC4-int	0	0	0	0.522615	0	0.98329	1.07627	0	1.22678	1.08009	1.10484	1.16277
HERVL-int	23.6533	29.1472	34.3108	64.2365	27.3657	43.1271	47.0676	37.6789	26.3185	35.4952	57.6318	42.4734
HERVL18-int	3.11273	2.53002	3.33559	5.15036	1.95229	3.82855	5.31367	6.46552	3.86145	5.18532	7.43068	6.73623
HERVL32-int	0	0	0	0	0	0.941448	0.681754	0.438664	0	0	0.588372	0.482346
HERVL40-int	15.0549	14.768	16.6167	20.6703	15.6703	15.9209	15.3504	15.4677	7.47289	13.593	20.767	14.5351
HERVL66-int	1.80407	2.76118	3.19187	3.77234	2.56093	4.72816	4.44403	2.49848	4.25927	2.62616	5.3184	3.05262
HERVL74-int	7.89844	10.6646	9.76892	10.1457	7.36535	6.2554	7.50217	5.55005	3.86145	5.46252	7.81157	6.09039
HERVP71A-int	2.21279	2.57156	3.58628	5.30539	2.20732	6.08803	8.36415	11.1192	3.19417	8.90347	14.6709	8.23734
HERVS71-int	8.02745	13.2595	13.5051	24.597	12.8515	23.2998	32.2822	17.4962	15.8953	16.4527	29.7037	20.6843
HSMAR1	10.1626	12.1415	10.2375	17.1908	11.6743	23.9128	15.6786	9.44081	16.8348	14.322	15.754	13.2019
HSMAR2	11.6048	17.4789	19.9261	41.2883	18.4498	27.3853	25.1849	19.931	14.8513	21.2099	37.0812	22.1559
HUERS-P1-int	4.44321	5.24132	7.20109	17.4626	7.8462	6.4144	7.5269	5.45469	3.67811	4.55305	9.08928	5.27793
HUERS-P2-int	0.785068	1.33123	1.86615	2.53212	1.53378	3.0754	3.1176	2.53662	1.86128	2.61229	2.33942	2.49811
HUERS-P3-int	11.2289	11.6763	16.2049	18.5575	15.8257	18.285	22.9518	16.8027	10.7787	12.4449	27.4756	20.1489
HUERS-P3b-int	5.5884	7.62087	10.178	19.1538	8.38001	15.377	18.3537	9.70782	12.3622	9.912	18.0962	11.4227
Harlequin-int	17.7486	23.5196	26.9192	50.551	27.8979	50.6419	43.7029	27.3554	28.1253	29.1017	42.6672	35.4369
Kanga1	1.21245	1.8896	1.94133	4.04208	1.26276	3.87709	3.24929	2.26961	3.69477	2.91298	4.06212	3.08296
Kanga11a	6.15356	11.9375	9.51639	26.5793	18.7149	11.5932	14.192	26.5514	11.121	16.2354	22.0991	11.9635
Kanga1a	1.23457	2.73433	3.08875	7.6308	3.56796	4.53987	5.03967	2.38404	4.3615	2.3915	5.67098	4.53554
Kanga1b	0.642306	1.29692	0.878725	2.18761	0.634089	1.86197	1.69941	0.667532	0.972309	1.51324	2.14537	1.28578
Kanga1c	2.9781	4.65909	4.38305	8.39422	4.64023	5.36918	5.48103	4.482	3.80589	5.61088	7.02673	4.9689
Kanga1d	1.06962	1.82753	1.52529	2.85044	1.25822	2.32224	2.14925	1.56698	1.70849	1.1947	3.09031	1.94691
Kanga2_a	2.07707	5.57615	4.82556	11.0759	4.71994	10.2932	11.8111	7.19027	12.5567	10.0178	17.0575	8.99754
L1HS	24.5806	25.936	20.2468	22.4201	13.9024	66.3373	86.193	91.6777	96.952	49.4758	68.4628	46.9362
L1M	0.624714	1.17062	1.51933	2.27029	1.48522	2.10508	1.80314	1.70507	2.12797	2.21688	2.7007	2.11604
L1M1	24.116	38.2082	48.3046	102.021	36.5516	97.9863	83.8977	55.9857	63.2345	77.8753	123.181	69.473
L1M2	59.3881	78.7237	84.0095	98.2812	74.8294	86.3312	81.5973	64.5049	218.102	63.146	117.056	59.4621
L1M2a	1.61959	2.52407	4.42011	5.39151	2.69655	6.08803	5.9773	4.63458	3.52809	5.16148	8.01979	4.37952
L1M2a1	0	0.498581	0.760508	1.4297	0.516267	1.61092	1.5698	0.972689	0.805627	0	1.83193	1.13614
L1M2b	0.436128	0.726797	1.03484	2.53212	0.603122	2.65697	2.55224	2.11703	1.80572	3.22897	6.43779	3.245
L1M2c	1.66467	2.10057	2.11637	4.8403	1.51529	7.78933	6.56606	4.22261	2.76858	5.16367	6.913	4.27418
L1M3	21.2832	35.9279	34.7199	73.8506	37.3714	54.7768	50.3513	31.9702	48.2443	50.54	67.164	45.1118
L1M3a	14.6829	14.3372	17.2765	18.1554	11.0574	15.0004	12.3563	13.5032	8.25018	9.34426	16.4766	13.0017
L1M3b	3.66566	5.4851	5.65903	8.56682	6.80251	7.48932	6.83197	10.6767	3.36141	4.73903	12.024	7.20205
L1M3c	1.66741	2.94563	3.38743	6.15804	3.69238	6.07757	5.42643	4.15777	4.13926	6.95298	8.16938	4.5492
L1M3d	1.34096	1.79574	1.591	3.87569	1.4969	2.82434	2.60406	2.46033	4.9171	2.7902	4.00216	2.23643
L1M3de	3.95291	5.63304	7.95444	16.2348	7.09467	8.93329	9.02822	9.34544	4.69486	6.47142	14.3373	8.70533
L1M3e	0.658382	1.83709	1.97723	3.2039	1.69869	6.40185	5.66111	3.29951	2.6669	3.31364	6.55989	3.49889
L1M3f	1.16106	2.11445	2.78434	6.87702	2.45465	5.95204	5.90233	4.97406	3.52809	4.5863	8.74399	4.03762
L1M4	79.8163	135.917	145.126	246.502	144.826	210.295	196.124	132.598	157.561	162.947	266.993	156.325
L1M4a1	6.6163	11.1696	13.2303	21.6594	10.4728	18.8599	21.887	14.8253	20.5707	18.3761	30.0787	16.3883
L1M4a2	5.92628	9.00771	8.7072	15.8125	8.49437	19.1641	17.7555	9.97483	10.6676	11.7472	24.2895	11.3344
L1M4b	11.9692	22.7061	26.1325	51.5966	24.2919	42.2501	45.4383	33.6718	41.8415	40.4752	66.6411	38.7629
L1M4c	17.5933	27.006	23.4027	47.9848	21.4749	45.1468	40.8156	21.7112	29.9093	34.3392	50.6359	29.0087
L1M5	121.733	210.561	209.927	386.234	200.706	279.915	305.468	194.101	278.659	273.261	398.964	259.293
L1M6	7.48208	11.8115	13.0954	28.5564	10.9157	22.591	24.9421	20.2064	21.3625	24.6841	34.8226	21.4148
L1M6B	35.0636	31.0268	41.9306	43.5741	31.3004	11.7648	21.0717	23.3892	11.001	26.0191	32.0219	19.7925
L1M7	4.09916	8.1488	9.75025	21.862	8.39215	20.0336	21.7626	11.5792	20.7146	16.8535	24.2791	16.207
L1M8	3.82724	5.69087	6.43396	15.8917	5.31515	13.0769	12.4703	5.95629	7.75069	7.31054	18.4748	8.52734
L1MA1	25.9226	38.2758	55.4283	86.905	51.3069	43.9702	58.8318	39.4977	49.4411	45.6305	83.0881	47.8689
L1MA10	10.6339	20.179	20.1172	29.1937	14.0189	19.9901	22.7957	14.2665	24.1683	18.0054	32.6681	18.6157
L1MA2	21.5185	42.3305	46.4936	88.3237	48.5613	80.8524	74.9337	51.5396	61.1177	71.55	108.409	54.662
L1MA3	27.3321	50.8531	52.7169	122.226	49.9664	135.374	117.231	67.9971	87.7217	86.6218	161.887	83.0564
L1MA4	25.9348	54.1209	57.4022	118.06	51.9584	111.921	96.125	67.0061	95.803	92.3414	145.765	76.9519
L1MA4A	27.3408	41.4558	56.2808	92.0505	41.2014	98.0934	94.9571	58.7313	61.046	65.3886	123.377	62.9674
L1MA5	28.1799	53.8538	56.674	83.8172	46.5927	102.267	79.5645	55.6786	53.707	49.6432	117.702	57.9868
L1MA5A	14.3789	23.499	25.2591	42.3873	25.6056	31.5908	34.1071	24.7483	24.7022	28.6611	51.1375	27.6168
L1MA6	17.5063	30.8822	28.6318	51.9942	28.2774	49.4469	49.3029	34.8513	36.4338	42.504	61.749	37.1971
L1MA7	21.1757	37.5511	41.0285	78.1797	39.2766	58.3836	61.683	41.8821	53.5048	56.6283	84.5739	50.5755
L1MA8	28.9842	59.1677	53.1932	110.258	58.0592	73.4727	81.2212	53.982	74.4227	76.13	110.89	65.8292
L1MA9	46.5455	81.1121	80.089	168.711	81.7616	118.309	127.473	88.0078	112.199	116.75	175.177	105.784
L1MB1	18.1015	32.0108	30.4215	58.9184	29.0408	46.4439	47.4922	36.1886	30.3127	46.2734	74.723	41.7789
L1MB2	38.7648	74.6755	68.1762	142.484	75.7328	125.39	106.148	73.4682	81.8878	93.2297	151.333	83.7955
L1MB3	76.8512	128.097	150.351	298.842	134.822	252.618	250.118	152.544	181.199	179.773	315.953	202.314
L1MB4	48.9363	83.0235	87.5245	150.448	85.9678	157.852	142.13	131.953	94.8918	156.935	221.416	133.142
L1MB5	63.5414	103.278	120.018	188.942	113.566	156.079	169.916	113.641	142.122	127.812	226.216	144.782
L1MB7	112.848	197.993	209.282	421.544	187.151	349.789	334.094	222.477	275.688	293.878	477.851	286.683
L1MB8	77.4762	138.328	153.823	303.618	151.141	235.731	245.932	158.776	192.896	193.096	315.352	203.643
L1MC	16.4993	34.0945	31.79	64.3636	34.3619	50.1545	50.7743	36.8443	44.9923	54.875	69.7025	46.3651
L1MC1	72.5824	118.599	121.565	215.746	123.912	188.998	192.224	138.308	156.636	173.447	273.373	176.699
L1MC2	32.8868	48.9446	46.3834	83.6143	41.3904	75.6895	64.4838	43.0485	57.3379	55.9751	90.8528	53.7272
L1MC3	48.9461	80.5025	88.225	160.704	89.36	127.617	131.45	82.3734	101.108	114.017	172.114	113.889
L1MC4	100.964	170.574	186.942	378.197	172.11	297.201	286.531	185.66	222.125	223.3	393.025	235.728
L1MC4a	50.5035	84.445	84.9957	143.497	86.4822	160.316	151.246	106.962	143.77	141.766	208.463	142.113
L1MC5	52.0177	90.2934	92.8536	184.229	90.7619	147.331	144.868	89.3524	124.209	116.219	189.221	112.653
L1MC5a	100.851	149.003	143.655	270.754	139.046	217.299	190.539	123.126	153.786	159.577	253.295	151.865
L1MCa	25.6013	48.0587	46.3142	86.4571	49.633	79.3866	76.4104	56.0051	54.7782	81.0189	118.391	63.0499
L1MCb	4.04662	5.82797	6.05161	10.2404	5.30611	11.9878	11.974	6.84697	7.91737	9.98397	15.7993	8.55137
L1MCc	9.25655	14.2815	13.4356	22.2458	12.4033	21.7889	20.4967	14.1662	10.6298	15.9328	30.6675	17.1575
L1MD	79.2433	82.9108	85.342	106.739	70.4569	83.9817	72.9923	52.6377	84.8931	71.1941	94.908	62.3628
L1MD1	29.0163	50.7092	57.1195	127.512	52.5014	107.599	117.829	69.1357	109.635	84.4709	145.243	92.7961
L1MD2	47.8336	91.9522	92.7797	193.966	93.5446	144.803	154.426	96.4732	144.013	138.105	197.512	132.454
L1MD3	19.5957	34.922	31.4234	60.3188	33.6356	54.981	51.1588	36.1512	37.975	34.445	67.3152	43.6469
L1MDa	41.7096	67.5025	62.9092	109.144	59.2035	86.5027	80.212	51.6074	57.6462	69.1392	102.997	58.5148
L1MDb	2.41051	3.40602	2.96098	4.83341	2.66585	4.22145	5.38989	3.36512	3.60199	5.86548	6.1437	3.67369
L1ME1	139.63	265.913	263.021	482.681	243.671	396.279	419.319	267.971	429.653	383.361	554.961	356.86
L1ME2	58.3222	111.855	102.467	190.051	105.061	133.322	143.373	95.0916	139.617	133.334	193.36	119.931
L1ME2z	20.776	39.481	38.054	79.4209	39.0874	79.3959	68.0909	41.4064	55.4044	66.6644	92.062	57.2969
L1ME3	26.3971	46.8414	51.5137	111.175	49.5734	85.7132	92.8813	51.5518	73.181	70.0318	113.66	72.8457
L1ME3A	63.501	105.18	104.664	197.872	103.076	166.463	160.262	97.1098	132.381	139.502	208.215	136.595
L1ME3B	43.8855	73.783	75.5438	139.635	76.5756	94.2184	106.179	72.5462	93.6267	99.6867	139.331	97.1385
L1ME3C	5.09826	10.1738	11.8443	25.1999	9.70305	21.0466	21.729	12.7212	18.195	16.0047	28.2489	16.7796
L1ME3Cz	27.6846	55.5329	51.6098	112.105	48.9675	95.8201	96.6679	58.8954	94.6379	91.2953	133.818	84.5281
L1ME3D	25.2181	32.2311	30.819	53.1724	28.6831	33.9825	38.6661	24.5366	38.1601	35.9937	51.7748	28.8429
L1ME3E	26.837	51.4191	41.1071	80.3738	47.1843	55.5308	51.6802	35.0706	62.7245	50.3463	65.4682	49.0929
L1ME3F	13.7252	26.9007	28.0664	53.9795	28.7865	44.851	56.0364	51.1448	67.4693	73.899	104.431	73.0711
L1ME3G	46.1341	91.7345	90.7947	186.738	90.7227	140.938	150.996	94.622	160.039	136.206	200.632	132.173
L1ME4a	51.3366	105.041	102.162	227.656	106.108	148.54	188.321	133.583	236.269	205.668	267.311	174.853
L1ME4b	82.2637	147.692	151.388	298.454	148.203	220.067	240.186	144.104	236.203	206.819	309.331	201.734
L1ME4c	24.1429	44.4937	41.7653	88.181	41.949	65.2243	74.3354	43.8511	73.1948	63.4922	90.5305	62.9383
L1ME5	10.5496	14.4974	16.7026	27.4168	15.0292	28.4317	26.691	17.4889	15.2325	23.5337	33.7932	22.7258
L1MEa	0.623766	0.82318	1.49698	1.8028	1.3832	4.89553	5.04036	3.90983	2.35188	3.60524	4.85122	2.9523
L1MEb	4.84958	6.93556	6.12245	12.7295	6.08259	15.8372	12.2142	7.59079	7.3801	9.89789	17.2939	8.51127
L1MEc	50.2398	95.2309	101.788	198.399	94.2386	186.318	163.636	109.666	109.948	148.349	234.726	130.647
L1MEd	42.4708	72.7656	78.0306	155.063	78.649	140.7	150.342	110.682	133.961	176.346	232.035	145.576
L1MEf	40.0868	67.5223	64.3787	124.535	61.1881	97.6277	101.761	72.8327	71.9636	99.6301	143.184	80.0855
L1MEg	38.6707	66.1192	68.1873	137.497	66.1295	116.329	119.829	83.0531	88.0328	103.884	164.46	91.6858
L1MEg1	1.15033	2.03586	2.6122	5.9944	2.46551	10.0212	7.00691	3.29951	2.55578	4.50451	7.3414	4.44899
L1MEg2	4.41305	6.34878	6.03624	7.45855	7.64382	7.00856	10.2464	6.92326	5.75051	6.55149	11.5779	8.72279
L1MEh	4.64659	7.13077	8.42384	16.1439	6.86578	15.0113	15.5616	10.8914	11.5616	15.5253	19.7245	12.6259
L1MEi	9.36813	15.9347	16.8986	35.7011	15.4654	28.7736	35.7621	19.3714	27.438	30.3976	45.0371	26.2792
L1MEj	8.00032	11.3291	12.2693	26.1686	13.0968	15.8025	21.8214	10.7763	12.8345	18.8965	24.112	14.6115
L1P	0	0	0	0	0	0	0	0	0	0	0	0
L1P1	9.71643	14.3868	16.6063	28.7207	15.3757	29.5811	29.894	23.4243	14.259	22.3441	40.0677	20.6433
L1P2	16.578	19.208	25.5207	46.1283	20.163	49.8315	38.672	27.5874	15.0213	25.1731	43.3735	29.7586
L1P3	16.199	21.2124	21.0778	33.4474	18.1103	30.0548	30.5832	27.3257	16.8915	27.7294	41.2428	23.9543
L1P3b	0	0	0	0	0	0	0.526363	0.476808	0	0	0.638101	0.752454
L1P4	7.67827	13.1814	13.6675	25.3535	12.2289	20.0562	17.6285	13.1149	18.695	15.989	26.525	13.7867
L1P4a	1.58764	2.03041	2.49914	4.7466	2.00916	5.27211	5.36132	4.21117	3.40808	5.23735	7.50391	4.70621
L1P4b	1.16501	1.27153	2.52836	1.67705	2.24825	2.52475	2.63773	1.66883	0.786181	1.0046	1.75435	1.96262
L1P4c	0	0	0	0	0	0	0.501333	0	0	0	0	0
L1P4d	0	0	0.487289	1.01629	0.402769	1.35987	1.60232	0.972689	0.916748	0.924413	1.74468	0.611065
L1P4e	3.79928	2.68968	3.88	3.2983	3.46585	5.13779	3.02396	3.28578	0.638946	2.20577	3.36711	2.17539
L1P5	0	0.675756	0.735825	2.17142	0.80343	1.90382	0.95028	0.629387	0.916748	1.32154	1.93317	0.99839
L1PA10	151.267	104.512	205.199	216.814	97.4922	173.926	337.232	168.306	688.578	279.215	251.892	218.911
L1PA11	25.4775	37.0476	49.9815	79.4433	44.9019	68.4575	66.7723	44.3123	35.5393	46.5008	92.2627	44.9827
L1PA12	7.87616	14.1217	23.7755	44.3799	19.2427	38.4303	38.8145	22.9284	12.77	20.6238	39.8162	22.9794
L1PA13	34.2552	55.8227	64.4322	108.684	58.0532	108.418	105.355	74.511	53.9365	87.0843	143.271	79.1146
L1PA14	17.6322	25.4196	24.6247	40.7902	23.7991	40.512	40.0217	27.7846	21.053	41.0729	58.8769	31.3217
L1PA15	27.5806	43.2834	47.1818	93.5581	42.7392	88.5601	87.446	54.5362	56.52	63.1469	113.473	63.5828
L1PA15-16	1.90399	3.83117	4.17432	8.5148	4.24699	8.63998	9.79775	7.02777	4.6393	8.29935	13.4406	7.46461
L1PA16	53.2248	77.3315	83.833	160.402	73.6628	143.063	138.131	98.1333	79.0254	114.295	199.448	107.135
L1PA17	16.5783	32.1244	29.6236	59.8854	28.7755	68.0767	52.0492	31.9908	37.3133	42.5918	75.8954	39.6326
L1PA2	22.0998	31.7673	39.7554	66.1347	38.067	66.3825	69.3577	50.7816	52.7441	57.5814	91.7911	52.2185
L1PA3	79.9152	113.704	138.015	234.731	145.827	177.173	198.42	150.519	132.539	163.323	258.844	154.144
L1PA4	83.7898	117.439	142.051	226.676	134.965	202.411	244.827	181.851	127.448	182.46	311.888	187.367
L1PA5	73.3095	113.1	145.399	250.498	123.955	254.141	250.808	173.501	124.166	168.116	314.632	180.901
L1PA6	60.1083	87.1449	121.678	199.839	110.662	195.76	214.951	138.491	91.5809	139.662	256.35	140.44
L1PA7	172.135	210.016	239.586	340.19	215.855	324.665	357.99	268.622	167.093	299.998	471.599	255.547
L1PA8	29.4795	48.6214	50.7262	90.4393	45.4643	92.7042	96.4968	64.5114	65.762	74.4056	130.715	75.4478
L1PA8A	14.2659	20.0253	23.0905	37.0509	18.9328	37.2123	39.9949	29.8074	23.6966	38.0343	57.0939	31.0916
L1PB	4.49505	6.93093	7.08012	15.3147	7.08707	14.6535	11.1155	7.76702	6.96117	8.67495	17.4547	8.35484
L1PB1	41.8804	73.559	88.4099	167.119	75.2682	208.634	191.089	132.561	105.073	153.638	283.822	135.961
L1PB2	6.41133	11.0089	12.0575	34.5711	12.8477	30.9406	26.9757	14.8078	15.8547	21.5318	35.6965	18.6028
L1PB3	7.70558	13.6274	15.4582	34.9174	14.1175	33.5285	30.566	19.815	24.4455	26.347	45.6803	24.3395
L1PB4	21.4195	32.161	34.4647	66.1065	27.968	66.2871	66.7884	37.4615	50.245	66.7584	89.6564	54.9435
L1PBa	8.69282	13.6814	14.7591	29.0232	12.4444	28.7255	28.8278	20.0431	14.4124	22.9761	36.1657	19.4109
L1PBa1	1.65544	2.45483	3.93652	7.9753	3.16665	7.66673	7.07705	4.408	3.45309	4.6793	8.36559	4.32003
L1PBb	0.95759	1.51958	1.74606	3.77234	1.66863	6.17171	4.21818	2.49848	1.41679	3.17703	6.79813	3.70159
L1PREC2	20.7188	37.22	43.3622	96.3317	36.2228	88.8518	85.0441	60.4772	56.8884	75.7024	128.245	70.9204
L2	226.62	310.251	390.615	824.5	316	788.3	1056.34	515.621	562.595	606.527	954.743	617.961
L2-1_AMi	2.33417	3.5526	4.58444	9.92176	2.84012	10.2932	14.7245	6.75161	7.86181	11.29	13.0495	8.42978
L2-1_Crp	0	0	0	0	0	0	0	0	0	0	0	0
L2-2_Mam	0.482845	0.752722	0.734214	0.844039	0.646106	1.31803	1.3507	1.12527	0.805627	0.440584	1.81536	1.04236
L2-3_AMi	0	0	0	0	0	0	0	0	0	0	0	0
L2-3_Crp	5.07247	7.46915	8.58175	27.1643	6.5942	29.7707	36.7936	16.9744	21.0108	19.3717	33.8844	21.2103
L2a	598.157	880.494	1023.1	2131.03	900.391	2104.68	2655.1	1305.11	1602.21	1632.15	2599.34	1761.18
L2b	276.552	405.049	503.386	1024.04	428.054	1057.51	1335.59	682.043	700.118	753.888	1267.03	907.896
L2c	398.955	571.487	672.955	1406.52	581.143	1407.04	1716.94	940.11	993.197	1130.59	1800.54	1207.93
L2d	66.5374	95.8102	116.169	249.513	93.5447	229.83	267.302	136.114	154.99	167.449	281.878	182.751
L2d2	130.966	187.475	219.543	459.767	193.975	450.318	489.62	264.845	310.811	324.963	521.282	339.266
L3	169.318	223.222	254.276	470.423	223.636	401.751	427.864	288.394	247.216	304.784	521.44	352.492
L3b	24.2675	31.3667	39.0228	65.3575	30.5145	58.2756	64.0672	41.279	35.7532	46.9245	77.9832	53.2864
L4_A_Mam	23.1577	36.3956	42.6989	73.4541	43.2554	61.8422	73.8596	50.885	43.9472	57.2156	94.7307	63.8161
L4_B_Mam	9.34907	14.4323	15.3851	28.3466	13.6092	27.197	26.4438	17.6877	18.1122	15.1138	37.8457	22.7311
L4_C_Mam	12.4566	18.1939	19.7716	39.9454	17.731	35.6913	35.1625	23.9987	30.8089	29.693	50.6196	31.5196
L5	1.453	1.62371	2.24415	6.1322	1.73909	4.03777	4.00248	2.26961	2.91693	2.6844	5.44962	3.44396
LFSINE_Vert	6.52852	7.0774	8.85348	14.739	8.67678	53.8717	62.6306	21.5289	50.5323	50.3136	58.7439	39.9469
LOR1-int	43.856	34.6503	40.4184	34.1233	31.0772	27.4903	32.205	33.6749	18.335	27.519	37.3114	29.845
LOR1a	2.17579	4.07655	4.55941	9.21518	4.25166	7.5002	8.8965	5.94408	6.75505	7.19322	9.51898	7.10089
LOR1b	3.51458	3.87886	4.95995	6.28068	4.33422	6.7596	7.43232	5.80409	5.17879	7.01224	8.50738	6.04058
LTR06	0	0	0	0	0	0	0.466017	0.438664	0	0.553963	0	0
LTR1	0	0.46807	0.565552	0.636991	0.480045	1.31803	1.99453	1.2397	1.13899	1.64603	1.52662	1.27715
LTR101_Mam	1.78552	2.4931	3.6138	6.97624	3.28628	5.71145	6.84658	3.90983	6.86172	9.32786	9.29329	6.58636
LTR102_Mam	0.653659	0.938097	1.53205	2.53212	1.2016	2.71932	3.02289	2.42219	2.91693	2.17389	4.50307	3.19229
LTR103_Mam	2.43328	2.06626	2.64757	3.81988	3.7621	4.7449	5.56072	5.26206	3.02805	3.99813	7.15252	5.15499
LTR103b_Mam	0.525028	0.880912	1.25999	2.97997	1.03488	2.23855	2.31801	1.46857	2.36132	1.61355	2.87628	2.04185
LTR104_Mam	3.29935	4.09481	4.35889	7.94085	4.22599	8.91237	9.48539	6.35109	5.16713	6.66928	11.4789	7.74779
LTR105_Mam	1.88082	1.86824	1.84435	2.4515	2.14185	2.76828	2.69195	2.30775	1.58347	3.69799	4.48638	2.74203
LTR106_Mam	1.09078	1.64079	1.9697	3.15223	2.23167	2.86619	3.01278	3.26137	1.80572	2.80471	4.41018	2.95509
LTR107_Mam	0.486162	0.692242	0.965532	1.7053	1.0867	1.4854	1.36447	1.04898	1.9724	0.521827	1.80374	1.37601
LTR108a_Mam	1.95036	2.12003	3.00445	6.52769	3.04197	1.44397	2.30558	1.73558	0.972309	0	2.30393	1.42596
LTR108b_Mam	0	0	0	0	0	0	0	0	0	0	0	0
LTR108c_Mam	0	0	0	0	0	0	0	0	0	0	0	0
LTR108d_Mam	0	0	0	0	0	0	0	0	0	0	0	0
LTR108e_Mam	0	0	0	0.521926	0	0.522608	0	0	0	0.800893	0.471604	0
LTR109A2	0	0	0	0	0	0	0	0	0	0	0	0
LTR10A	1.76488	1.92224	2.58317	5.51485	1.87806	5.45328	5.37381	2.86733	3.80589	3.91133	5.01102	3.69617
LTR10B	1.4605	0	0.961886	0	0.772502	0.899606	0.987173	0.400519	0.472264	0.784365	0.535003	0
LTR10B1	0	0	0	0.981841	0	0.815921	0.965071	0.476808	1.08343	0	1.08299	0.72505
LTR10B2	0	0	0.413941	0.568434	0	0.648553	0.454632	0.438664	0	0	0.518447	0
LTR10C	2.79673	3.78538	4.71606	11.6577	4.01993	10.0568	7.19009	2.84178	5.68106	5.01587	9.26921	5.27442
LTR10D	0.925675	1.52153	1.31693	2.22206	1.09099	5.66961	2.54478	1.39228	2.47244	3.51312	2.65336	1.84832
LTR10E	1.2858	2.01753	2.11201	4.8403	2.88863	4.20513	4.40508	2.51755	2.91693	0.724303	4.405	3.01322
LTR10F	0.446302	0.930047	0.883248	2.35986	0.822587	7.67761	6.39879	2.74642	4.95377	6.23173	3.81748	3.19113
LTR10G	0.508902	1.17027	1.17655	2.24859	1.23527	2.72183	2.44249	1.3385	1.09732	2.534	2.39647	1.69568
LTR12	3.31011	5.06789	5.232	10.485	6.17688	15.7996	11.8698	10.132	7.34732	8.41345	13.6786	11.731
LTR12B	0.417172	0.555981	0.695512	3.36582	0.769113	2.46325	1.88536	1.77754	4.37261	1.99099	2.76783	2.3993
LTR12C	38.2276	43.3659	55.9854	92.9886	51.4989	111.761	93.3716	67.69	43.3427	64.2145	90.5128	76.7522
LTR12D	1.73537	2.82388	4.19261	7.63252	3.89651	6.75123	7.00522	6.88244	4.78654	5.57188	7.08505	6.37352
LTR12E	2.26487	2.30229	3.48926	5.47557	2.68044	4.75034	2.78829	2.05256	2.0174	2.02281	3.11004	2.8467
LTR12F	2.36358	3.06483	4.7197	6.31823	4.44948	6.41021	6.53801	3.92089	5.70773	4.70546	7.98994	5.25899
LTR12_	3.7348	4.83338	4.93979	7.63045	4.11306	8.13746	6.80793	5.16059	4.00591	4.93636	7.00789	7.05464
LTR13	22.3649	34.6556	39.7667	60.0708	39.983	49.6549	52.6358	36.6185	40.5614	35.8612	50.8831	45.9269
LTR13A	5.02598	6.70997	9.11789	16.1049	9.29325	17.9808	16.7425	12.6152	17.5766	11.3776	15.9765	14.7852
LTR13_	0.586441	0.941229	1.1499	1.61573	1.00904	2.23855	2.37676	1.00702	0.805627	1.43134	1.04266	1.21948
LTR14	1.7173	2.92073	2.75456	5.5238	2.5017	4.10053	3.66188	2.54654	6.24556	3.93685	4.5023	3.76582
LTR14A	0	0.536564	0.830153	2.41877	0.557095	1.27284	1.98712	0.629387	0.972309	0.770555	1.69131	1.28625
LTR14B	1.17805	1.85829	2.35071	4.4207	2.79663	5.20934	4.68974	2.86009	3.35641	2.97764	4.87806	4.03539
LTR14C	0	0	0	0.637335	0	0.564869	0.494932	0	0	0	0	0
LTR15	0.965885	1.65382	1.94737	4.79276	2.02213	4.39719	4.67484	2.01785	4.78265	3.34548	4.94579	3.32345
LTR16	6.96429	9.28844	11.4292	16.3123	9.65827	15.5439	19.6779	12.912	9.25082	12.0459	22.0729	15.7204
LTR16A	8.75774	11.8591	15.0222	25.8207	12.168	26.5773	29.4041	21.99	17.9738	21.7048	37.0373	28.1905
LTR16A1	3.85938	6.05702	7.88449	16.7309	6.69842	17.7118	23.1655	12.1804	9.19526	9.67671	21.8184	15.8744
LTR16A2	3.07072	4.49123	5.41937	9.67475	4.73425	11.243	11.411	7.41914	6.25	6.22028	11.3306	8.8564
LTR16B	2.74505	2.81842	4.44723	6.48497	3.02438	6.7437	7.63226	5.41616	3.02749	3.63618	7.79803	5.63372
LTR16B1	2.72356	4.01766	5.36416	10.9725	5.41581	11.1509	13.6763	9.78411	6.41724	6.49468	11.38	9.30088
LTR16B2	4.59401	5.31552	5.65837	8.83657	5.28063	10.5233	9.6176	5.39747	7.63957	9.20274	10.1412	8.16674
LTR16C	17.1769	25.6399	32.4183	43.1101	31.9388	47.8883	70.1735	48.1569	28.4748	53.9108	70.9813	55.5555
LTR16D	3.89949	6.91714	5.86348	8.02698	6.89443	6.84119	8.76323	7.19027	7.88959	7.873	10.9128	8.27583
LTR16D1	6.31482	3.68459	34.109	5.21926	1.9856	2.15445	2.02995	1.08712	44.1434	1.85871	5.44417	2.03561
LTR16D2	1.01302	1.62372	1.5113	2.72159	1.76912	3.28503	2.44254	1.16379	1.08287	1.21371	2.87897	1.62835
LTR16E1	3.55487	4.45959	5.5313	9.93899	5.71364	13.7451	13.3036	9.51709	7.69457	10.4764	16.1463	11.9814
LTR16E2	3.80083	4.8153	4.96751	11.2929	5.51759	13.2012	12.4332	10.2991	7.19508	10.0431	15.7443	11.5203
LTR17	9.24561	8.72508	9.25964	11.0287	8.77023	12.7008	14.1988	12.1102	8.59576	10.9325	11.9153	12.3673
LTR18A	1.03696	0.837542	1.29088	1.08519	0.724545	1.35987	0.80844	0.629387	0	0	1.3163	0.89982
LTR18B	0.970178	1.54357	1.70334	3.80679	1.71864	2.48961	2.15838	1.73558	1.02787	2.09668	2.45424	2.00116
LTR18C	0	0	0	0	0	0	0	0	0	0.66229	0	0
LTR19-int	1.6427	1.9992	2.71768	4.4958	2.2277	3.82855	5.49593	2.61253	3.69477	3.13639	5.69016	3.8067
LTR19A	2.15569	2.30301	3.89898	7.32074	2.72114	6.3667	7.59923	3.41395	3.50031	3.40959	6.55882	4.19242
LTR19B	0.56163	0.901444	1.40721	2.39397	1.22987	3.33356	2.38091	1.04898	1.80572	2.04719	2.26273	2.12786
LTR19C	0	0	0	1.18854	0	0.732237	0.79631	0.400519	0	0	0.627269	0.50215
LTR1A1	3.22112	4.59316	5.14331	10.7317	5.99055	6.38051	7.58418	3.98612	7.19508	3.23572	5.87225	5.49694
LTR1A2	3.12771	4.36226	5.12192	9.31888	4.08148	11.1501	12.0123	7.99093	5.13935	7.09889	13.2863	10.1483
LTR1B	0.888386	1.03356	1.19921	2.29096	1.19031	2.74066	2.25178	1.77373	3.63921	2.66902	2.64389	2.63472
LTR1B0	0	0	0	0.533984	0	0.564869	0.68115	0.8964	0.472264	0.845252	0.755547	0.777296
LTR1B1	0.409579	0.564695	0.856048	2.15316	0.742434	1.94566	1.64102	1.16341	0.972309	0.889881	2.12856	1.63212
LTR1C	0	0	0	0.844039	0	0.732237	0.648822	0.514953	0.416704	0	0.734729	0.728964
LTR1C1	0	0	0.438904	1.05074	0.579415	1.02513	1.89262	0.553098	0.472264	0	0.587838	0.627979
LTR1C3	0	0	0	0	0	0	0	0	0	0	0	0
LTR1D	1.81508	2.03792	2.41441	3.70344	2.54208	5.20934	4.06279	3.83354	3.63977	4.1949	5.58948	3.71597
LTR1D1	1.38183	2.0774	2.30635	4.19263	1.84349	3.90387	4.07715	2.76549	2.2502	3.18491	4.41322	3.84323
LTR1E	0	0.474634	0.764807	2.35986	0.605359	3.15908	2.44045	1.583	1.86128	1.68438	2.65766	1.67906
LTR1F	0	0	0	0.981841	0.60884	0.690395	0.956118	0.438664	0.638946	0.523875	1.02396	0.786238
LTR1F1	0.487593	0.566994	0.555893	1.2919	0.404619	2.02934	1.89916	0.858255	1.63903	1.56733	2.28271	1.43433
LTR1F2	0	0	0	1.01629	0	1.65276	1.18527	0.8964	0.750067	1.3494	1.06543	0.693601
LTR2	5.72165	6.48735	8.85382	15.0191	7.29173	34.7097	27.6999	12.6717	28.4336	17.3572	21.9533	21.2393
LTR21A	1.48971	1.99603	1.78247	2.56657	1.80246	1.69461	1.78418	1.01083	1.02787	1.85939	1.53348	1.08613
LTR21B	0	0	0	0	0	0	0.460283	0	0.472264	0	0	0
LTR21C	0	0	0	0	0	0	0	0	0	0	0	0
LTR22	1.22308	1.38505	1.20083	1.15409	1.10268	0.941448	0.660065	0.858255	0.583385	0	0.552628	0.709256
LTR22A	0.656294	0.832216	1.00047	2.39431	0.711481	1.6105	1.06929	0.8964	0	1.29792	0.930141	0.906826
LTR22B	0.420049	0.436915	0.766721	2.42876	0.688387	2.40592	1.85508	0.858255	1.02787	0.587711	2.14661	1.39386
LTR22B1	0	0	0.509068	1.4986	0.660667	1.77829	1.64028	0.934544	0.972309	0.725142	1.56979	1.19533
LTR22B2	0.711686	0.478055	0.921027	1.15409	1.29703	1.31803	0.877548	1.01083	0.583385	0.813736	0.951596	0.751288
LTR22C	0	0	0	0.424775	0	0.439342	0.850077	0.705676	0.462819	0	0	0.514324
LTR22C0	0	0	0	0.878489	0	0.481184	0.717885	0.553098	0	0.592846	1.26004	0.622273
LTR22C2	0	0	0	0	0	0.481184	0	0	0	0	0	0
LTR22E	0	0	0	0	0.414951	0.523027	0.7395	0	0	0	0.545686	0
LTR23	1.45998	2.14324	3.24238	5.97717	2.94667	7.80356	5.14689	2.78456	3.9448	2.82344	5.65526	3.57593
LTR23-int	0	0.624944	0.628903	2.57208	1.16015	2.25947	1.14979	0.8964	0.620055	1.21169	1.8149	0.810427
LTR24	1.92944	3.61314	4.06827	8.14756	3.88477	6.92487	5.9584	3.71911	7.41733	4.59687	5.94229	5.96099
LTR24B	1.77086	2.49859	2.89219	5.49486	3.21086	7.51066	7.63269	4.93973	12.1955	5.87996	9.31148	8.73346
LTR24C	0	0.779273	1.04562	2.70437	1.35281	2.11303	2.17242	0.743821	2.1952	0.642199	3.22179	1.90556
LTR25	2.01826	2.09225	2.32099	3.6962	2.54254	8.21319	5.1479	3.1004	3.73978	2.19004	4.60579	3.28803
LTR25-int	3.38789	4.97959	5.38308	10.8884	5.85232	9.15631	9.47766	6.76648	6.96895	7.0548	10.5403	8.19399
LTR26	0.863222	1.90829	2.34481	4.4269	2.41781	5.71145	5.20018	4.42478	5.13935	3.89508	5.91424	5.05771
LTR26B	0.488496	0	0.824626	1.46415	0.728939	1.31803	1.06019	0.667532	2.13908	1.1544	1.48055	1.14189
LTR26C	0.481565	0.63681	0.909494	1.7742	0.564153	3.78671	3.03013	1.96445	2.58356	2.89268	3.29612	2.34043
LTR26D	0.870199	1.20559	1.28374	2.49801	1.57132	2.69882	2.78429	1.27785	2.41688	2.15226	2.77297	2.13075
LTR26E	0.531567	0.918152	0.660862	1.13687	0.552458	1.71553	1.69097	0.877327	1.58347	0	1.34208	1.19332
LTR27	0.664055	0.828789	0.882284	2.15316	0.668882	3.32645	2.78997	1.54486	1.91684	1.39127	2.417	1.77118
LTR2752	0.617892	0.901946	0.955276	2.42876	0.873129	3.49382	2.59093	2.42219	1.63903	3.09961	3.58412	3.03213
LTR27B	2.7795	2.97913	4.29577	3.66898	3.29538	4.41434	3.92018	3.07065	2.02796	2.07311	3.26574	3.15947
LTR27C	0	0	0.529446	1.4986	0.422002	0.815921	1.3915	0	1.13899	0.831559	1.35346	1.18391
LTR27D	0	0.408885	0.498344	0.775138	0.605913	1.45401	1.82145	1.01083	1.08343	0	1.84912	1.24808
LTR27E	1.16646	1.37368	1.20227	2.32541	1.41477	2.90803	2.79452	1.96445	1.6946	1.75013	2.98619	2.01723
LTR28	0	0	0	0.775138	0	0.98329	1.12847	0.934544	0.638946	0.678168	1.17502	0.714384
LTR28B	0.451672	0.689563	0.797185	2.01536	0.529727	3.36829	3.2126	1.583	1.86128	1.43742	2.73376	2.28299
LTR28C	2.13274	2.07401	2.87244	3.73789	2.00221	4.52606	4.35421	2.3459	2.96304	4.61276	4.48509	2.97544
LTR29	2.2777	1.70493	3.98357	5.8187	3.37656	5.58802	19.374	13.3888	192.866	9.19125	14.7529	15.5499
LTR2B	6.80225	8.32547	6.03653	11.5885	6.43911	7.89728	6.8506	4.73261	7.62179	5.45767	6.93184	6.19256
LTR2C	4.69621	6.85135	6.06374	8.5558	5.86156	6.97132	8.23621	5.44706	7.79847	5.73793	7.80569	5.94448
LTR3	0.640063	0.448313	1.25503	1.30912	1.00715	0.523027	0.761462	1.08712	0.527825	0	1.09353	0.799849
LTR30	0.677255	0.737548	0.75261	0.930165	0.785735	4.20513	1.71864	0.667532	2.27798	2.53993	1.5708	1.33741
LTR31	1.4285	2.1959	3.19774	5.35706	3.0633	4.70724	4.72273	1.92631	2.80581	2.64704	4.64071	3.11763
LTR32	2.61193	3.90232	3.99773	8.35426	3.61938	10.0212	10.2293	6.84697	8.13961	6.97773	11.0637	8.22109
LTR33	24.8737	35.3244	43.638	71.7464	41.1578	81.162	92.2757	53.6573	48.1921	59.2211	92.7879	66.9933
LTR33A	2.73463	4.06618	5.1266	9.88145	4.28841	10.1814	13.5497	8.04853	5.11157	8.85243	13.7221	9.77778
LTR33A_	2.37321	4.40006	5.67303	10.3407	5.36534	11.8484	11.0625	5.98833	5.61161	6.44546	11.5917	7.80913
LTR33B	2.60238	3.16355	3.97776	8.24609	3.18149	8.81948	7.38367	3.81828	5.02545	5.6554	7.84117	5.62292
LTR33C	4.71999	5.28168	5.24106	7.3893	4.56806	6.82027	7.232	4.36756	3.16695	5.00022	7.12512	5.47171
LTR34	0.545813	1.33402	1.65805	3.60008	1.71481	3.15908	3.52695	2.49848	4.86154	1.81986	3.82624	3.00727
LTR35	0.494792	1.02728	1.7377	2.56657	1.92349	2.32224	2.54241	1.02991	1.91684	0.526479	1.79622	1.53969
LTR35A	0	0	0	0.878489	0	0.899606	0.705567	0	0.527825	0.763352	0.642995	0.60018
LTR35B	0.513834	0.490195	0.651711	1.4638	0.425516	1.98792	1.44612	1.12565	0.805627	0.954786	1.63997	1.7432
LTR36	0.694348	1.37016	1.74117	3.39304	1.51958	5.1675	5.82369	2.99436	4.86099	3.98386	6.54023	4.50274
LTR37-int	2.72181	4.5918	4.93976	12.5224	5.12748	8.43119	8.70052	7.15213	7.88959	8.50811	13.2423	8.40873
LTR37A	2.58298	4.35572	4.89595	7.18294	5.66369	8.78852	10.5378	6.61772	15.1964	10.7928	12.9823	10.8507
LTR37B	2.4264	3.9456	3.93735	8.71013	4.16944	6.7437	6.56852	5.05341	4.97266	5.663	8.88939	5.78055
LTR38	0	0.529393	0.707859	1.22299	0.419226	1.56908	1.21513	1.16341	0.916748	0.832783	2.24461	1.44643
LTR38-int	0	0	0	0.465083	0	0.690395	0.514299	0	0.694506	0	0.412367	0.430821
LTR38A1	0.584719	0.521741	0.951237	1.91201	0.977211	1.02513	1.54562	0.591242	1.30567	0.655385	1.26705	1.2279
LTR38B	0.72164	1.30371	1.25722	0.94739	1.3084	2.44776	3.01105	2.53662	2.91693	3.60463	2.96989	2.61627
LTR38C	1.50561	1.55514	2.67278	4.01349	2.12654	3.66119	3.91788	2.11703	2.02796	4.87043	6.69204	2.90224
LTR39	3.26959	4.88676	5.26086	11.3859	4.61753	8.43119	12.3896	8.90678	7.91682	11.6041	17.025	10.568
LTR39-int	0	0	0	0.878489	0	1.35987	0.60986	0.476808	0.472264	0.693228	0.886501	0.459583
LTR3A	1.27415	1.28087	2.14463	5.72189	1.68901	2.7302	2.09293	1.81187	1.6946	0.959231	3.37808	2.68168
LTR3B	0	0	0.451163	1.18854	0	0.606711	1.24448	1.81187	0.861188	1.09224	1.45506	1.49278
LTR3B_	0.611889	0.552951	0.904646	2.56657	0.693601	1.77829	1.39222	1.08712	1.25011	1.68196	1.4519	0.991677
LTR4	0	0	0	0.844039	0	0.732237	0	0.553098	1.08343	0.828795	0.804535	0.490883
LTR40A1	0.585367	0.785991	0.690995	1.73975	0.879701	1.52724	1.279	1.27785	1.63903	0.867006	2.13884	1.29746
LTR40a	5.20396	7.41844	7.39149	15.468	6.59812	11.1932	11.7447	7.68615	10.3065	7.58599	15.0171	10.3714
LTR40b	4.78176	6.5176	5.99038	10.2663	5.80545	8.45211	7.59325	4.59643	5.91719	5.44691	8.51036	7.11562
LTR40c	1.73586	2.968	3.17496	5.28816	3.37998	5.92066	5.18281	4.40571	3.52809	5.11159	6.84092	6.41193
LTR41	5.66927	7.40228	7.75062	16.1039	8.28779	17.4712	15.888	11.5067	9.54252	10.1244	18.1037	14.4624
LTR41B	7.06691	7.55865	8.19212	12.9362	7.54805	10.3488	10.8784	8.05501	7.54678	8.65067	11.4958	9.01127
LTR41C	2.42903	3.07579	3.89702	6.04607	3.09163	7.93578	7.43617	4.8253	6.66726	5.94379	10.1028	7.85569
LTR42	5.53044	5.7083	7.32407	9.52558	5.631	8.3475	9.24259	7.07584	5.75051	6.31294	10.8315	8.2321
LTR43	1.93056	2.94188	4.53249	8.14756	5.36104	8.51487	7.8999	5.13046	7.97293	7.90184	10.4044	9.42039
LTR43-int	0.448586	0.590199	0.683684	1.87721	1.44006	2.57371	1.19521	1.27785	0.917304	0.741217	1.35749	1.22326
LTR43B	0	0.471316	0.709301	1.60161	0.625019	1.24229	1.5023	0.667913	0.916748	1.26533	1.67153	1.33794
LTR44	1.07271	1.55612	1.80661	3.11778	1.40682	3.11724	2.09603	1.20156	0.972309	1.58213	2.2686	2.01799
LTR45	0	0.499191	0.656013	0.775138	0.442508	1.31803	1.57259	0.553098	0.861188	0.614486	1.28347	0.95812
LTR45B	1.24814	1.23929	1.90691	4.35765	1.84292	5.4604	3.80101	2.91807	3.34919	2.25541	4.8784	3.87973
LTR45C	1.64919	2.56255	3.13177	5.44319	3.89288	9.69357	5.03042	3.2484	7.36177	4.85351	6.09733	4.5403
LTR46	3.94356	3.71071	5.26025	6.59728	4.41551	5.75999	6.95904	4.00748	3.76089	2.96525	4.68789	4.90506
LTR46-int	0.717203	1.44513	1.66603	3.82057	1.95466	8.19687	3.86155	1.96445	0.8723	2.40445	3.89657	2.62729
LTR47A	2.69145	3.12697	4.01172	5.83903	3.66503	6.25498	6.85109	3.68058	4.25038	3.81782	6.30981	4.47003
LTR47A2	1.88129	2.67538	2.08605	3.70344	2.04302	2.82434	2.1421	1.2397	1.13899	1.61509	2.24792	1.77665
LTR47B	0	0	0	0.637335	0	0.481184	0	0	0	0.508058	0	0
LTR47B2	3.68278	4.08469	3.50602	3.35342	4.38079	6.19975	5.88582	5.23154	9.92644	6.82662	10.8377	9.24594
LTR47B3	0	0.504161	0.583712	1.53305	0.720143	2.69882	1.61721	0.400138	2.528	0.740731	1.30256	1.15845
LTR47B4	0.643624	0.451431	0.944693	1.94646	0.848619	2.23855	2.26922	1.39228	1.08343	1.15391	2.46581	1.74702
LTR48	3.17842	4.24824	5.49804	10.0075	4.91588	7.21777	10.333	4.93935	5.52827	6.30927	9.79485	6.54894
LTR48B	3.73985	5.68048	5.07555	9.18107	4.61908	14.4355	28.8134	24.8131	30.8861	37.8156	40.4448	34.2437
LTR49	3.17736	5.0413	5.10295	9.38192	5.04875	9.21238	8.96542	5.83537	5.08323	6.15961	11.4293	7.60984
LTR49-int	6.20358	9.32451	10.8646	19.0515	11.3952	20.3491	15.6553	10.8708	13.5984	13.4718	22.0179	14.3336
LTR5	0.975327	0	0	0	0	1.13811	0.818207	0.747636	2.6269	0.419321	0.821773	0.589948
LTR50	7.03907	12.8778	12.9388	23.2025	13.0976	23.7872	28.4905	18.0615	20.0851	22.5712	29.2648	25.5456
LTR51	1.93433	2.82342	2.72246	7.04514	3.75598	5.41856	4.74899	2.57477	4.75042	2.50822	4.75114	4.17492
LTR52	3.91908	4.37476	5.38913	7.82028	4.87876	6.17171	6.20235	4.32942	3.36141	3.7176	7.66017	5.02896
LTR52-int	2.70595	3.65469	3.21003	5.18481	2.62813	5.25119	5.2823	3.3758	6.25056	6.54512	5.69908	5.56825
LTR53	3.47367	5.83607	6.06081	9.56003	4.30899	9.4354	7.86386	4.25351	5.80607	5.76693	9.11942	7.45465
LTR53-int	9.59174	9.46003	9.16397	8.76767	10.3317	8.76593	8.76763	10.9284	4.75042	9.12974	11.6537	9.80738
LTR53B	0.643623	0.902493	0.808339	2.01536	0.788565	1.77829	2.38325	1.27785	0.750067	2.44402	2.83473	1.80756
LTR54	2.77199	4.04378	4.45286	9.59448	4.46158	10.5651	9.19135	5.70263	6.22278	6.47981	11.1972	7.18886
LTR54B	1.37959	2.79024	2.46322	5.49486	2.04148	4.87461	4.84289	2.38404	4.66708	2.97545	6.10441	4.19565
LTR55	0.649865	1.06172	1.79718	3.94459	2.04093	3.45198	4.577	2.11703	2.63912	2.75348	3.99321	2.88421
LTR56	3.36581	5.06318	6.42376	10.0148	4.87377	8.68224	8.36088	6.0074	6.36112	6.99914	10.8717	6.88017
LTR57	0.774599	0.97205	1.39801	3.25558	1.03218	1.9875	1.8365	0.629387	0.416704	1.09381	1.47794	1.1894
LTR57-int	14.8704	11.6844	15.0993	8.26469	9.88131	2.05026	5.00732	9.36452	0.916748	4.72606	6.77909	6.20065
LTR58	0	0	0	0.533984	0	0.774079	0.401593	0.667532	0.638946	0.448579	0.684174	0.478399
LTR59	0	0	0	0.499189	0	0.480766	0	0	0	0	0.550983	0.514838
LTR5A	26.3072	38.4781	47.9167	57.6658	47.7215	55.7387	61.3784	42.9898	47.577	44.236	52.0573	55.0894
LTR5B	12.5996	19.2052	23.829	50.7457	23.5374	35.1453	36.9361	19.3481	26.7829	21.6397	36.3858	37.7459
LTR5_Hs	29.7209	38.1143	40.6671	57.5803	36.0847	51.2093	46.377	38.2663	62.8845	36.662	52.8059	50.51
LTR60	0	0	0	0.775138	0	1.31803	0.629632	0	0	0	0.528742	0
LTR60B	0.876741	1.40213	1.7006	2.96792	1.69616	1.56908	2.23987	1.31637	1.91739	1.30099	2.95462	1.61871
LTR61	2.76924	3.75604	3.97792	6.94213	3.9475	4.51853	6.14274	2.80401	6.86228	3.89724	6.61683	6.19333
LTR62	2.06851	3.07157	3.71342	4.53025	4.34332	3.8704	4.69785	2.61291	5.19491	2.51892	5.48076	3.88468
LTR64	2.39636	3.69451	3.36664	4.80585	4.03776	2.86619	2.95068	2.65105	4.19482	1.16731	4.8898	3.88799
LTR65	1.47952	2.36602	2.74928	7.35485	2.43875	6.33908	5.38589	3.26099	3.75033	2.12624	6.64856	5.04532
LTR66	0.740948	1.08231	0.844101	1.8431	1.05195	4.28882	3.8229	1.2397	3.44475	1.66078	3.59903	2.88395
LTR67B	15.0179	18.2421	21.7164	30.1649	20.1827	31.005	28.5935	22.1277	21.5464	18.9282	33.3165	25.7559
LTR68	2.23707	2.16864	2.57744	3.18668	3.03654	1.69461	2.40439	1.69744	1.08343	1.99859	2.84251	2.03515
LTR69	0	0	0	0.706236	0	0.690395	0.825127	0.591242	0.527825	0.649935	1.32793	0.656043
LTR6A	3.87785	6.88773	5.66398	10.9842	6.6334	19.7779	35.3393	17.6465	26.5157	26.7488	35.2393	29.2573
LTR6B	0	1.14776	1.04002	3.33964	1.33425	3.84111	2.9008	1.46056	4.18093	2.93521	2.71406	2.79627
LTR7	2.44944	3.42605	3.88504	7.91915	3.74013	11.248	11.5657	5.71026	10.1526	7.27393	9.84249	7.79552
LTR70	6.60905	9.26319	8.27173	11.7649	5.00716	7.51024	5.21187	2.61291	4.97211	2.54208	5.52054	2.81374
LTR71A	0.887795	1.37911	2.45514	4.09962	1.93889	1.1925	2.29398	1.50671	1.63903	2.35966	2.24057	2.22043
LTR71B	1.13369	1.62506	2.40055	4.01349	3.24129	7.23869	5.22597	4.21537	5.19491	3.10151	5.42822	4.28957
LTR72	1.27749	1.87481	2.25045	3.87569	2.2206	4.33066	6.26409	4.40571	8.19517	5.28934	7.9912	6.73441
LTR72B	0	0.725942	0.998221	0.94739	1.48046	0.564869	2.50791	3.41395	1.47235	1.25188	2.98951	2.05976
LTR73	0.556826	0.734798	1.25444	2.95241	1.0575	3.03355	2.51632	1.88778	2.19464	0.815863	3.07883	2.76926
LTR75	2.32712	2.91705	3.81491	7.5271	4.68065	5.85748	7.05376	4.40571	3.58365	3.54275	6.80811	4.24624
LTR75B	1.0127	1.07365	1.24646	1.91201	1.84744	1.46447	1.53876	1.39228	0.694506	0.43679	1.47893	1.13703
LTR75_1	0.935917	0.81179	1.1332	1.87756	1.11842	2.23855	2.12167	2.49848	2.63912	2.80427	3.73599	3.30971
LTR76	16.7295	18.6357	17.1083	15.0446	16.4004	17.331	15.7167	14.7883	21.4186	12.4541	17.8918	16.4221
LTR77	3.29562	2.28792	2.53946	2.15282	1.8085	1.86156	2.16425	2.0026	1.25011	1.63962	2.01864	1.57831
LTR78	9.8051	13.4052	15.5764	25.1489	12.6612	25.0011	29.2057	22.5496	18.9456	22.1162	35.4329	23.6183
LTR78B	4.27922	5.38369	6.73403	13.7737	5.12521	13.4514	14.7357	11.2462	8.86134	13.1111	19.8091	12.6671
LTR79	13.0012	17.0792	17.7418	29.9716	16.8575	28.2083	32.7178	23.3636	25.2522	19.8189	37.5349	30.1885
LTR7B	3.68193	7.17157	8.89546	16.5139	9.68542	26.0693	25.7522	8.41433	22.0953	21.6947	21.1163	14.5952
LTR7C	2.07693	3.11176	3.45144	6.72682	3.33093	7.79728	9.14688	4.31073	8.79745	8.89563	8.29606	8.10855
LTR7Y	0	0	0.436296	0.928787	0	1.09543	1.41461	0.653418	1.22122	1.23333	1.7873	1.38334
LTR8	15.8046	20.1648	22.4036	41.8536	23.0891	46.7276	44.557	22.0091	35.5332	32.8248	47.2959	38.8182
LTR80A	0	0.462443	0.647461	1.87756	0.478805	1.44313	1.19694	1.27746	0.693951	1.23932	1.59149	0.776447
LTR80B	0	0.711993	1.20888	3.73754	0.690867	2.57329	2.64684	2.574	1.75016	2.39418	4.34902	2.19743
LTR81	0	0.565658	0.575053	1.15409	0.640096	0.815921	1.00841	0.858255	0	0.680245	0.977388	0.963513
LTR81A	1.92916	2.2323	2.44359	3.9787	2.37658	3.41013	4.16437	2.72734	1.9724	4.41574	4.76145	3.5269
LTR81AB	0	0	0	1.05074	0	0	0.758705	0	0	0.583307	0.704583	0
LTR81B	9.98334	11.2712	12.6633	19.4129	10.8157	13.787	17.0411	13.2934	27.1969	12.8913	13.7062	12.0259
LTR81C	0.929605	1.2577	1.49093	2.63547	1.443	2.69882	2.03609	1.81187	2.08352	1.20842	3.521	2.71906
LTR82A	2.77409	3.60565	3.57146	5.59822	4.29001	5.08382	6.47705	6.08407	3.60588	6.48174	9.34999	8.02757
LTR82B	5.4792	5.57113	4.36467	7.493	3.44776	8.55713	8.62814	5.43562	4.6393	7.11777	11.639	7.42388
LTR83	1.84222	2.85755	2.69764	3.35893	3.03481	4.48129	4.44658	3.60467	3.08361	3.08639	5.19442	3.55453
LTR84a	3.36326	4.60019	4.47073	6.42503	4.31392	4.45619	5.09434	4.21499	3.69477	4.64764	6.04858	4.15469
LTR84b	2.67067	3.7332	4.40159	7.01069	4.07657	7.34329	7.57714	6.46552	4.9171	5.74827	8.53205	6.67367
LTR85a	4.57955	4.92584	5.09294	7.19431	3.94788	6.855	8.05081	7.49543	4.97266	7.2757	9.9686	6.54379
LTR85b	1.42493	2.00266	2.73101	7.04514	2.02028	6.24828	5.20643	3.35025	4.47262	4.49632	7.18315	5.57385
LTR85c	1.43708	1.87121	2.48956	4.18574	2.1604	5.62777	5.28249	3.68096	4.86154	5.8186	7.12307	5.19838
LTR86A1	1.65933	1.81523	2.61012	6.08052	2.19048	4.12145	4.097	2.30775	2.13908	2.21891	5.0364	3.55062
LTR86A2	0.654202	0.904007	1.23136	4.03933	0.793305	2.9779	2.80697	1.75504	2.3841	1.58266	3.28715	2.50559
LTR86B1	0	1.1476	1.18914	2.87662	1.53578	3.82855	3.45132	1.39228	1.47235	2.05136	2.54352	2.06137
LTR86B2	0	0.775555	0.716384	1.18854	0.596875	1.31803	1.10501	1.14434	0.972309	1.43116	1.80337	1.39494
LTR86C	0.738777	0.443494	1.01707	1.53305	0.685513	2.02934	1.88015	1.39228	0.472264	1.90875	2.17966	1.56516
LTR87	5.13896	7.35544	8.09836	17.4086	8.58065	16.6887	12.6545	8.58903	5.88886	8.54202	15.5947	10.9825
LTR88a	2.62172	2.85603	3.21067	5.80492	3.22115	4.19802	4.89096	3.68096	1.6946	3.99121	6.34586	4.13409
LTR88b	2.43501	3.14059	3.47299	6.11497	2.81077	7.21777	5.58953	4.29128	2.80581	3.27441	7.47627	4.80205
LTR88c	3.18025	2.25465	2.10126	1.99813	1.32187	2.13395	3.12232	2.76549	1.86128	2.87859	3.4597	2.8568
LTR89	2.40844	4.34853	4.59215	7.4551	3.70642	6.23448	5.71957	3.50931	2.63912	4.38469	7.54079	5.22291
LTR89B	1.58546	2.22897	2.77622	4.51302	2.52732	2.76158	3.6105	1.95491	2.58356	2.21112	3.80949	2.74184
LTR8A	10.1594	13.4603	12.0729	21.4055	11.7132	20.4817	20.2043	13.3697	11.4455	15.3696	22.0101	17.4905
LTR8B	12.1081	12.2298	18.5479	35.1916	15.3992	19.1428	24.3118	17.0697	12.6956	20.9709	26.1214	20.3996
LTR9	0.913204	1.55794	2.27909	4.5647	1.82379	6.77842	5.0926	3.0325	3.52809	4.30338	6.05106	4.06605
LTR90A	0.842758	1.30644	1.48395	3.80679	1.24998	1.86197	2.06583	1.50671	1.75016	1.60392	2.81431	1.78575
LTR90B	0.536999	0.877573	0.974993	2.18761	0.864116	2.44776	1.67819	1.04898	1.19455	1.66514	2.34272	1.28653
LTR91	1.04601	2.16781	2.30971	4.53025	1.71373	3.45198	3.95558	2.99436	3.29196	5.21152	5.20878	3.50849
LTR91A	2.44461	5.73642	9.38739	15.7267	9.30351	8.93329	9.92346	7.03769	7.58401	9.68669	11.2548	8.3204
LTR9A1	1.62888	2.31146	3.11788	5.63267	2.54631	6.96671	5.24528	3.14694	3.19473	3.72759	5.97819	4.36604
LTR9B	1.18991	2.04785	2.31069	6.44191	2.26086	7.21777	7.91836	3.73818	6.8895	4.19206	6.49472	5.11
LTR9C	0	0	0	0.878489	0	0.857764	0.693439	0	0	0.902099	0.962795	0.4347
LTR9D	6.77812	7.67867	7.9937	12.7984	8.09804	7.21777	9.04276	5.62634	4.97266	8.08102	10.1412	8.51761
Looper	1.32907	2.6942	3.33599	10.2146	3.22206	4.91729	5.05376	3.26137	10.1387	2.79069	5.57222	3.75864
MADE1	3.94893	8.00128	7.28599	12.1438	7.66196	11.1082	10.5445	8.60162	9.36139	6.66171	14.4282	9.13152
MADE2	1.93155	3.63344	3.97049	9.49113	4.27129	7.04998	7.32639	4.32942	5.30603	5.27522	10.1683	6.33829
MARE10	0	0.516534	0	0.465083	0	0	0.605412	0.629387	0.750067	0.477978	0.755657	0.535464
MARE4	0.516531	0.887687	0.953038	2.63547	0.877261	0.857764	0.86774	0.858255	0.805627	0.958157	1.3209	1.05102
MARE6	0	0.654224	0.58295	1.18854	0.69126	1.90382	1.1255	0.82011	0.472264	1.05669	1.73661	0.843674
MARE8	0	0	0	0.775138	0	0.815921	1.0267	0.8964	0.638946	0.740218	1.3409	0.768657
MARNA	16.0129	23.5157	20.3209	36.7012	21.0934	27.4765	28.1995	18.6592	19.3351	23.3942	35.2491	22.317
MER101	4.31395	5.59091	4.94342	7.66525	5.35008	4.33066	3.30004	2.45995	1.88906	1.65611	4.20074	2.59259
MER101-int	25.7638	23.873	25.1164	24.7534	21.1027	24.2935	29.1461	22.0434	14.3002	18.9639	25.4585	20.7639
MER101B	0	0.462263	0.40452	1.22299	0	1.65276	0.98526	0.514953	0.472264	0	1.28563	0.484533
MER102a	7.18827	10.6834	12.985	27.4512	10.8911	25.0283	23.5019	16.2622	13.6584	12.87	28.0716	18.2356
MER102b	8.95953	12.8903	16.2462	32.5982	13.0598	36.029	32.4253	21.0238	19.1962	22.5171	36.1966	26.4056
MER102c	12.2375	13.3756	14.118	26.4577	11.5079	25.5149	26.8982	15.8033	14.134	16.3106	29.1596	19.3189
MER103C	33.3464	42.9376	43.9697	74.0167	41.9173	75.2911	63.1098	41.3294	49.5827	54.3231	80.1189	57.5076
MER104	6.75253	11.1771	11.7348	19.3151	10.5717	15.0489	13.883	11.316	12.6495	11.2976	20.1257	12.0441
MER105	2.3437	3.52388	3.73857	8.45761	3.90747	7.09224	5.49617	3.90983	3.86145	4.39339	8.37231	5.68819
MER106A	0.969399	2.07878	1.91368	4.15129	1.77997	5.08424	4.65956	2.38404	2.528	3.73875	5.78057	3.12867
MER106B	2.75626	4.37525	4.15754	6.83844	4.34699	5.79513	7.69426	3.70957	10.0842	4.40078	7.8669	5.15468
MER107	0.61615	1.41749	1.52285	5.87382	1.91145	3.78671	2.84904	1.20156	1.80572	1.67344	3.72803	2.23706
MER110	0.740827	1.40941	1.71832	3.60008	1.32372	3.03355	2.88905	2.04074	2.47244	2.44574	3.41016	2.62206
MER110-int	0.805986	1.20724	1.68275	3.01442	1.43543	2.86577	3.24557	2.46033	2.13908	2.87844	4.87273	2.70096
MER110A	1.08059	1.54152	1.46437	3.49673	1.28777	2.57287	4.64726	3.03212	2.19464	3.03336	5.36336	3.67
MER112	11.5154	21.4829	19.8425	42.3091	20.2616	30.0213	33.6907	21.7249	32.4523	30.573	43.8057	27.2228
MER113	6.76937	12.2382	12.3316	28.2663	11.5789	26.0886	27.9484	16.1543	18.7233	19.6007	33.4725	22.9469
MER113A	3.00794	5.97469	7.62112	14.8654	7.06038	8.745	11.6529	8.01038	8.13961	9.02384	14.6096	9.27135
MER115	6.42309	8.67401	9.75876	16.5876	9.2798	17.3427	18.2475	11.8439	9.38417	14.4298	21.9714	16.1309
MER117	7.61016	10.8775	13.5596	29.9145	13.1352	29.9661	28.0967	16.8916	12.6956	15.2933	30.5565	21.3425
MER119	4.17854	5.72308	6.12698	13.229	4.71381	12.6991	9.43828	4.86345	5.19491	4.88907	12.0549	6.59199
MER11A	9.03068	14.9628	16.2064	26.9035	14.0155	25.4496	25.9203	14.4061	20.7474	18.1834	30.002	24.1633
MER11B	6.46318	9.3429	8.83148	15.6881	9.41051	16.385	15.5696	12.2639	20.7707	15.8979	21.1573	16.993
MER11C	16.2925	25.8065	27.3392	41.753	32.9143	37.8479	36.6494	32.2856	37.0483	35.9667	46.8609	35.748
MER11D	8.319	7.2636	8.77325	8.84794	7.76459	6.17757	8.5938	7.33522	5.81941	7.00396	10.6994	9.27895
MER121	0.705199	1.64314	1.50021	3.01442	1.23441	1.90382	3.07858	2.04074	3.47253	2.39023	3.46572	2.81124
MER121B	0	0	0	0	0	0	0	0	0	0	0	0
MER123	0	0	0	0	0	0	0	0	0	0	0	0
MER124	0.899282	1.49453	1.42344	4.10065	1.885	3.20092	2.70723	1.43043	1.71293	2.86571	4.06372	2.67969
MER125	0	0	0	0	0	0	0	0.591242	0.694506	0.495603	0	0
MER126	0	0	0.410434	0.689011	0	0.857764	1.06753	0.57217	0.972309	0.873197	1.37852	0.912584
MER127	0	0	0	1.32635	0	0.815921	1.24156	0.400519	1.6946	0.706317	0.86699	0.572548
MER129	0	0	0	0.602885	0	0.564869	0.688733	0.400519	0.527825	0	1.07384	0.511177
MER130	0	0.400216	0	0.637335	0	1.02513	0.727922	0.553098	0.527825	0.845243	1.00166	0.569711
MER131	7.1156	7.71834	6.89623	11.7607	8.60744	6.83366	6.35467	7.54349	11.3955	6.35788	8.22267	7.65354
MER132	0	0	0	0	0	0	0	0	0	0	0	0
MER133A	0	0	0	0.465083	0	0.439342	0	0.781966	0	0.409273	0.437683	0
MER133B	0	0	0	0.637335	0	0	0	0	0	0	0	0
MER134	0.667586	0	0	0.740687	0	0.523027	0	0	0	0	0	0
MER135	0.958689	1.15014	1.22871	1.87756	1.11944	2.86619	2.03591	2.11703	1.47235	1.37903	3.40845	1.73423
MER136	0	0	0	0	0	0	0	0	0	0	0	0
MER1A	20.9165	29.7408	35.2245	60.5462	33.1718	52.947	54.0175	41.7429	41.3509	29.6225	60.9327	46.436
MER1B	28.8086	40.4792	47.9876	102.316	43.2158	148.905	91.1701	52.1155	42.3038	43.1549	93.8633	64.7158
MER2	35.3711	50.7415	55.03	103.985	52.5997	67.8709	67.9613	44.4141	67.3932	47.7052	84.9778	53.2094
MER20	63.5832	79.3454	97.0281	176.336	80.9942	181.909	168.59	114.336	82.7012	109.531	187.782	129.334
MER20B	6.84156	11.9615	16.8354	30.7127	13.301	25.7128	28.0731	14.9519	19.779	16.9241	33.1398	22.1713
MER21-int	4.36235	6.28484	6.39325	12.3505	5.62865	15.0008	12.8474	7.26618	8.41742	10.1312	12.9375	9.47037
MER21A	9.8242	14.3041	16.0106	36.4728	15.5769	38.9759	31.6225	22.1174	24.7239	19.5907	41.9209	31.613
MER21B	18.8061	28.0315	31.6599	57.7043	26.4992	72.3032	52.052	30.8384	32.8351	28.2242	61.5043	39.8686
MER21C	103.977	91.5186	86.2125	104.373	61.7111	262.815	277.468	288.317	264.929	134.991	321.198	218.789
MER2B	3.65361	6.40247	7.61792	17.6904	7.13739	12.528	12.2662	5.97918	8.88968	7.38592	13.8149	8.47538
MER3	23.4739	30.7508	37.6894	79.4302	33.9685	66.1432	63.2627	39.5583	40.3358	29.3002	77.242	51.1019
MER30	12.6925	17.6563	17.1513	34.9246	16.059	36.3725	32.355	16.2206	24.4133	19.2688	35.9083	21.1669
MER30B	0.68138	0.726945	0.869956	1.44141	0.640602	1.36656	1.01464	0.591242	0.990644	0.94167	1.30998	0.955486
MER31-int	8.77768	11.7288	13.0936	25.5392	13.411	14.9318	16.8774	13.5585	10.4309	15.9761	19.1079	14.8524
MER31A	6.99767	7.15625	10.8025	20.6187	9.18441	15.6276	24.4282	10.3563	15.2514	15.8802	21.1693	14.9903
MER31B	3.77831	6.0823	7.15509	15.9158	5.72107	15.5025	21.3871	11.0047	11.2504	11.9097	20.9687	14.5181
MER33	24.9547	40.556	37.7855	75.4412	43.6309	59.138	63.6557	40.2617	63.9607	42.1996	72.9093	49.286
MER34	8.08575	6.41527	8.06218	11.317	7.21312	11.4852	11.2413	5.58819	9.25027	8.00874	11.7249	7.93121
MER34-int	2.42165	3.51128	3.8135	8.38699	4.65635	5.42274	8.33535	16.2229	6.66448	11.9001	15.8332	10.3974
MER34A	3.12394	4.63597	5.80886	10.8254	5.03896	9.82244	10.4461	6.20614	11.1399	7.89853	12.6482	8.4507
MER34A1	2.26401	2.62371	3.45233	6.45948	2.70271	7.59476	9.35988	6.31294	5.47271	5.24902	9.15395	7.59535
MER34B	2.33726	3.59738	3.61571	7.32936	3.07305	5.5332	6.05907	2.71971	5.07212	5.11744	7.99658	5.14526
MER34B-int	17.9552	31.8221	22.8555	24.2615	30.4193	15.2636	21.6471	27.9963	58.0496	51.7082	38.2807	26.662
MER34C	0	0.53422	0.60219	0.775138	0.62839	1.1925	1.37924	0.8964	0.638946	0.555712	1.44453	0.957049
MER34C2	2.35972	2.87059	3.22534	6.21833	3.22269	6.96671	9.37901	4.40571	6.4728	5.98001	7.74189	6.27508
MER34C_	5.36982	10.5227	9.85091	16.4381	11.2423	6.91692	10.5226	7.91502	9.22804	7.2224	11.5801	9.36373
MER34D	0.506788	0.691605	1.05264	1.6364	0.872142	1.61092	1.93686	1.27785	1.13899	0.909436	2.18789	1.34252
MER39	6.82599	9.81342	11.9175	23.1336	10.0652	24.6664	25.6389	15.4295	20.2512	15.3091	29.9894	21.912
MER39B	8.03572	13.2093	10.5974	18.1038	10.7762	22.6157	22.4913	14.3233	36.2532	16.0678	21.0707	17.9762
MER4-int	7.3949	12.3723	13.2257	29.6678	13.7148	28.1736	23.3093	14.1578	21.353	15.19	27.1492	21.6542
MER41-int	20.1297	30.2251	33.2851	47.0905	35.0238	30.7665	34.3484	32.6377	22.327	22.9511	45.8325	31.8648
MER41A	12.0479	16.4769	18.9509	38.1688	17.9363	63.1917	39.8278	18.6085	30.446	23.5606	39.0741	31.5301
MER41B	9.6306	12.9754	15.968	27.4912	16.2305	27.5112	31.6623	21.6948	24.4605	19.3824	31.5501	24.0169
MER41C	1.58798	2.73563	3.82157	6.70063	3.40737	5.35579	6.40884	4.08148	6.97284	4.56945	6.73793	5.21687
MER41D	0.877677	1.2059	2.31942	5.08146	2.26013	5.12566	4.23606	1.69744	4.58374	3.52397	4.32642	3.80419
MER41E	9.70121	8.22845	7.81676	11.4717	6.32154	8.2429	5.54578	4.07499	5.83885	6.41259	6.77633	5.37315
MER41G	4.28058	3.52634	3.95547	4.87475	2.67631	2.65697	3.52072	2.11703	4.02814	2.70332	2.74356	2.3722
MER44A	10.3246	16.64	14.1463	22.7198	12.921	23.6195	22.7779	17.0697	44.0317	28.4514	32.1412	22.8591
MER44B	5.34661	8.01941	10.6375	24.2763	8.80557	17.9298	19.04	14.3985	10.6109	15.6675	26.2013	15.7962
MER44C	6.45369	9.79757	11.1334	24.9935	10.3889	21.3817	17.7795	13.007	11.9727	10.1072	22.7834	14.4864
MER44D	1.74916	2.9726	3.54271	7.20258	3.03179	5.04198	7.02113	4.74901	11.2649	3.47854	8.33006	5.86844
MER45A	6.31634	8.53023	10.2418	18.0004	8.75776	15.3766	19.3174	13.1019	12.5283	13.1723	20.7043	14.752
MER45B	1.98621	2.82447	3.61574	6.73508	3.20072	6.21356	6.98454	5.70263	6.13944	7.81334	9.6829	7.02767
MER45C	0.618138	1.11461	1.65407	5.21926	1.16438	5.36834	4.09745	2.37451	2.47244	3.48795	4.70692	4.11624
MER45R	0.948135	1.27126	1.49945	2.01536	1.9698	1.56908	2.55767	2.72734	2.80581	2.73474	3.75822	2.55009
MER46C	9.19878	14.2227	15.8654	28.2319	12.4349	25.4609	21.1548	13.3312	16.9176	17.7795	30.5235	18.2208
MER47A	8.49173	14.5089	15.2756	37.0857	14.315	28.8083	24.0788	16.2294	26.3073	16.6643	32.0652	21.2376
MER47B	3.32196	6.10254	5.56925	9.24998	4.54857	9.47724	7.06993	4.21499	6.69504	7.28833	10.1408	6.96387
MER47C	1.46782	2.28872	1.9802	3.69792	2.3678	2.70551	2.89677	4.04295	1.86072	2.72188	4.2205	2.69233
MER48	0	0	0	0	0	1.23434	0.803324	0.705676	0.861188	0.861138	1.06817	0.991892
MER49	18.5471	20.6496	22.9531	29.5531	20.415	20.4248	23.9034	18.7958	14.958	18.1568	27.267	23.2886
MER4A	5.12382	7.27889	9.0902	18.4293	7.93736	16.9042	15.0823	10.0416	14.279	10.1403	15.2619	13.6567
MER4A1	12.8529	16.6203	18.859	32.3146	16.9704	26.9292	26.1682	16.2294	18.4366	18.4566	28.1364	23.0049
MER4A1_	2.41508	2.25283	3.04625	5.7119	2.44656	3.91224	5.89471	3.09925	3.41753	3.06155	6.07638	4.12374
MER4B	6.80791	10.9321	9.85058	15.3649	8.90086	17.0088	19.7921	13.0264	18.5016	15.8337	21.2895	17.2306
MER4B-int	4.10915	5.19026	4.64519	8.78489	4.80367	11.0672	9.78845	7.91502	14.9736	10.7238	13.1983	11.9967
MER4C	1.96626	3.00158	3.69287	11.7993	4.17615	7.51066	7.81725	4.52014	8.25073	4.71367	9.5288	6.06654
MER4CL34	4.29798	5.05204	6.63464	9.70644	5.43465	7.5525	13.1842	10.8712	12.1955	13.1508	15.5953	13.5827
MER4D	4.14158	6.68145	9.7009	18.8786	8.24051	12.992	16.685	9.74558	11.0288	10.3472	16.7298	11.7787
MER4D0	1.74983	2.90595	3.54661	6.11497	3.23614	6.21356	6.32659	3.22322	4.40761	4.26838	6.36554	4.99731
MER4D1	9.01905	12.3809	13.1832	20.3307	11.4112	27.0823	24.931	14.297	16.3731	16.829	27.1359	17.5755
MER4E	2.4455	3.68263	3.73722	5.77012	3.2667	7.39309	8.57052	4.06203	5.4177	7.04703	9.00526	6.08238
MER4E1	3.30389	5.53172	6.34927	13.0392	6.00592	9.0492	11.5646	5.55005	8.88968	6.52332	11.7475	8.2569
MER50	15.1087	17.2261	18.5978	29.4208	15.618	38.85	35.9097	26.2336	21.6964	22.4048	37.5645	32.2162
MER50-int	2.69963	4.4485	5.80014	9.97344	4.63831	8.55671	11.341	7.19027	6.41724	7.38637	12.2953	9.48492
MER50B	1.4615	2.34859	2.76855	5.73602	2.95572	5.4604	5.52763	3.45209	5.69495	3.93277	7.13345	5.31376
MER50C	0.777645	1.69251	1.92003	3.35893	2.25674	1.56908	2.29266	1.16341	1.80572	0.545307	1.45928	1.10644
MER51-int	3.64859	3.90645	4.9425	9.04327	3.36018	5.96208	7.97832	5.74077	4.9171	6.39239	10.3261	7.60226
MER51A	13.9715	15.8909	18.4168	25.5565	17.1874	35.1892	33.3744	17.5973	43.4483	15.626	30.4402	26.1689
MER51B	2.25457	2.51022	2.64833	3.82401	2.39767	4.10053	4.62844	2.3459	3.80589	2.35877	4.50946	3.17587
MER51C	4.15404	4.3628	5.20303	8.59541	5.32414	8.11737	5.34522	3.98612	5.69495	5.34152	5.09043	5.2716
MER51D	4.97622	1.5257	2.25125	2.25651	0.986238	2.44735	2.7123	1.46857	1.47124	1.70551	1.67391	1.63359
MER51E	1.48198	2.99228	2.50012	5.46041	3.00251	4.33066	4.37751	2.57477	4.02814	2.28177	3.70836	3.11657
MER52-int	1.07521	1.52234	1.72843	2.80807	1.05634	3.92605	3.15596	2.07888	1.37012	3.85406	3.8332	2.60445
MER52A	14.5334	13.663	17.3013	28.0255	15.8161	35.3913	32.9496	21.3038	16.1403	24.5341	30.5385	27.5288
MER52C	3.60796	8.28993	5.65268	9.18107	5.34758	12.5736	11.1115	7.64801	5.36159	6.21009	8.07114	8.21304
MER52D	7.62601	7.85625	7.18333	11.3515	5.32133	13.7728	10.035	8.56348	5.63939	8.41286	8.99202	7.54137
MER53	5.50728	7.88491	9.24156	17.9064	8.05026	15.1515	15.5716	11.1573	11.5288	11.1928	17.6024	12.7565
MER54A	2.97078	4.58097	5.41216	9.7657	4.76176	12.4066	14.6808	11.1573	7.80569	9.20852	13.1499	12.0957
MER54B	0.92596	1.20967	1.48507	2.42876	1.25729	4.6654	4.7756	2.0026	1.75016	2.58518	3.52542	2.41304
MER57-int	8.34589	9.63881	8.10805	12.9631	8.20935	19.5612	16.8184	13.697	16.4587	14.1356	18.7741	16.1413
MER57A-int	9.83017	18.0067	17.6911	33.7168	15.8154	21.1985	20.6743	14.247	12.6472	12.9792	28.6249	17.6534
MER57A1	2.65258	3.44919	4.66127	7.08786	3.38181	6.06669	5.98187	5.32652	5.83385	4.08418	6.84185	5.05512
MER57B1	2.69147	3.32913	3.99072	6.45948	3.48638	7.76171	7.27534	4.78716	9.86199	4.35081	8.69307	7.35459
MER57B2	3.00478	4.43547	3.85325	6.52838	3.52834	8.59814	5.47164	4.48925	5.69495	4.60502	6.34313	5.33807
MER57C1	3.217	3.8012	4.40557	3.39338	4.29339	2.82434	2.70505	3.68096	1.63903	3.0244	5.74439	5.43232
MER57C2	0.543144	0.563243	0.955595	1.05074	1.05631	2.02934	1.85543	1.2397	1.52791	0	2.02576	1.72312
MER57D	1.74606	2.01381	2.35887	3.46228	2.12192	6.67382	3.10514	2.65105	3.19473	1.95104	4.50661	2.94973
MER57E1	5.50077	8.43601	7.45127	18.4087	11.1304	12.8468	9.80193	8.43913	24.8411	11.2682	10.7161	13.9548
MER57E2	0	0	0	1.01629	0	0.899606	0.586236	0	0	0	0.58714	0
MER57E3	1.04767	1.45051	1.64295	4.32355	1.26801	3.84948	1.93877	1.62115	1.36123	1.42889	2.41574	1.3815
MER57F	0.548599	1.02488	1.22397	2.29096	1.09642	2.30132	1.85536	1.35414	2.58356	2.25069	2.92724	2.47992
MER58A	50.7949	63.4303	69.633	127.978	59.0337	112.437	105.519	73.3648	84.1547	69.6344	130.568	92.435
MER58B	21.7037	30.9358	34.0912	72.5243	29.1579	54.9885	56.1165	34.4305	55.8561	36.4974	70.5522	49.6236
MER58C	6.39304	9.61506	10.3339	25.235	9.07724	19.3721	15.9033	10.8518	11.0843	13.3565	20.8356	13.7326
MER58D	1.9834	3.15366	3.40949	5.96649	2.70639	4.87419	6.00375	5.7278	3.75033	7.91028	9.7537	6.28216
MER5A	119.63	138.541	157.986	270.007	143.104	233.408	243.027	176.107	127.754	162.031	280.721	194.651
MER5A1	35.6589	50.5044	56.6498	110.257	53.2686	99.4014	107.134	67.4962	63.7635	77.2479	124.257	89.9148
MER5B	69.1861	91.3776	92.8576	162.516	90.1889	141.866	156.103	108.975	94.8323	112.038	190.041	129.939
MER5C	0.935191	2.03565	2.37167	6.56283	1.94374	5.83698	4.99693	2.59384	3.47253	3.11805	5.83336	4.25064
MER5C1	1.76236	2.84101	2.84179	5.06423	2.49041	4.2679	4.60994	3.29951	4.25038	4.07947	6.00343	4.22198
MER6	5.33887	7.68241	8.57863	17.1047	10.3892	10.0212	11.1198	6.04593	7.69513	6.42156	10.7987	7.50833
MER61-int	9.69455	17.9457	17.543	24.8871	17.4195	21.1512	26.7385	24.384	28.7153	25.607	38.7521	29.2792
MER61A	0.526602	1.19473	1.03712	4.39245	1.13309	3.15908	3.18051	1.73558	1.52791	2.12811	3.37754	2.49506
MER61B	0.569502	0.92528	1.0263	3.04887	1.19236	5.54408	3.41469	2.11703	4.0837	1.94773	2.46693	2.57631
MER61C	0	0	0.496	0.91294	0.490221	1.56908	1.70292	0.896018	1.30567	1.0515	1.37666	1.09804
MER61D	0.662688	0.645787	1.24471	1.86033	0.767517	2.15487	1.91446	1.43996	0.861188	0.728117	2.39627	1.638
MER61E	2.64927	2.38112	3.65791	3.39338	3.13709	3.24276	5.12787	4.02426	3.08361	3.18099	4.41222	3.80263
MER61F	0	0.639501	0.43793	0.844039	0	0.98329	1.45194	1.31599	2.08352	2.06176	2.65615	1.8976
MER63A	5.67072	7.31643	8.40695	17.8282	8.91071	19.624	22.0474	15.391	12.5011	13.6885	24.7851	18.2538
MER63B	4.27082	6.44456	9.0976	18.0349	9.45384	16.4226	20.7929	10.9918	12.8067	12.1317	20.7749	14.9005
MER63C	3.67401	6.36014	7.52092	10.3259	6.41349	6.02485	8.75396	7.1136	13.7329	6.35994	11.4347	9.58102
MER63D	1.95399	3.19121	3.69693	8.34393	3.46824	4.97921	4.88336	3.5856	6.02831	3.11344	6.27921	4.4865
MER65-int	15.6194	29.5243	18.605	27.918	18.2223	18.221	15.0772	9.97788	9.44528	36.2331	15.2006	11.1586
MER65A	6.12394	8.19022	7.40203	11.6267	7.07632	14.2887	14.9999	10.4711	15.418	18.0274	16.1329	13.004
MER65B	1.10872	1.36079	2.06812	3.49673	1.47902	1.31803	1.42305	0.8964	0.694506	1.54772	1.19628	1.29452
MER65C	1.60136	2.42336	2.37723	6.11497	2.54975	5.93112	5.55087	2.99436	3.63921	2.92819	5.85263	3.44339
MER65D	1.53319	2.32644	2.87429	5.87348	2.80509	6.21397	5.41206	3.9289	4.3615	4.88996	6.16973	4.82125
MER66-int	5.08718	6.90887	6.05466	8.21646	7.57677	23.3688	13.4099	6.27404	12.0839	9.10582	14.5913	11.1051
MER66A	0.821594	1.04401	1.04602	2.60067	0.823948	3.53566	2.81682	1.31637	1.97295	1.73397	3.00356	2.06199
MER66B	3.99942	5.09221	6.83428	10.9377	6.08244	13.2635	13.4376	10.0507	9.25027	9.30662	16.8328	11.1703
MER66C	3.69471	3.90098	3.91219	5.59822	3.5048	4.70724	4.56144	2.76549	2.13908	3.04852	5.59948	3.3571
MER66D	0	0.540856	0.573633	1.22299	0.608538	1.27618	1.38785	1.04898	1.19455	1.11271	1.98876	1.10605
MER67A	6.74669	6.41343	5.9748	6.95316	5.29485	11.1509	8.16065	6.13481	6.6117	5.43554	7.12198	7.10492
MER67B	6.76633	5.8962	10.6141	12.2472	8.74415	10.7325	13.6138	8.44828	7.58401	5.06685	11.2914	9.5507
MER67C	8.21803	10.1839	10.8954	17.9308	12.1562	12.9288	15.0817	10.9277	12.39	12.0668	16.8535	12.9672
MER67D	2.36094	2.41376	2.28126	7.49851	2.54449	3.12059	5.19427	3.23886	5.75051	5.30531	6.18809	4.38278
MER68	15.2535	22.6434	26.1642	50.8315	20.2829	40.7961	37.4745	24.1082	21.9036	28.0432	46.5157	32.3589
MER68-int	62.2394	63.4679	61.7897	52.072	55.1337	35.88	59.9354	66.0093	38.1428	59.3453	87.2016	66.2852
MER68B	1.64711	2.805	4.28592	12.2472	3.34497	11.9878	8.32038	4.25313	5.58383	4.54252	10.118	7.84596
MER68C	0	0.568285	0.745398	1.73975	0.506662	1.90382	1.29314	0.8964	0.638946	0	1.57128	0.718094
MER6A	6.10627	9.08705	8.65348	19.1369	9.98478	16.7268	13.0977	8.14351	10.3615	8.15376	15.5787	10.949
MER6B	0.837567	1.94157	2.40195	6.01162	2.27816	4.45577	3.97543	2.86733	1.86128	3.10613	5.27524	3.04437
MER6C	0	0.501292	0.751243	1.3949	0.566358	0	0.457617	0.438664	0.472264	0	0.749367	0.554794
MER70-int	7.00055	7.41289	6.87728	12.006	5.90571	5.20934	5.29652	3.3758	2.63912	3.28801	5.02903	4.29166
MER70A	5.40441	6.3122	5.84093	6.58006	4.29829	5.20934	3.58576	1.94538	3.25029	3.58791	3.19623	3.16505
MER70B	0.428572	0.693945	0.623962	1.25745	0.597141	2.07119	2.10547	1.08712	2.02796	2.06183	2.4439	1.93946
MER70C	1.67299	1.59285	1.67726	3.42783	2.17846	2.32224	2.9172	2.04074	1.52791	2.8532	3.31604	2.60731
MER72	12.717	14.8541	15.9889	23.1425	16.7627	10.5651	16.5683	15.2762	6.39668	12.5358	18.8038	14.8003
MER72B	0	0	0	1.11964	0.438823	0.564869	0.989658	0.629387	0.638946	0.608224	1.53751	0.798844
MER73	1.37874	1.2122	1.31053	3.16945	1.12264	3.03355	2.5226	1.65929	1.80572	3.36534	2.5537	1.79406
MER74A	8.87163	11.7009	14.1598	21.4282	10.4505	22.0993	29.8412	17.0316	13.9268	16.3137	24.195	17.867
MER74B	9.601	9.02184	13.0509	19.826	8.84203	15.8925	15.6985	7.66708	8.01905	10.674	14.962	10.4136
MER74C	1.50845	2.11173	2.07442	2.91107	2.15865	1.73645	2.24836	0.934544	1.08343	1.3729	1.88343	1.3269
MER75	1.24543	2.04088	2.77525	6.28723	2.28871	2.69882	4.12837	2.07888	4.47262	1.80615	4.94623	3.16185
MER75A	0	0	0	0	0	0	0	0	0	0	0	0
MER75B	0	0	0	0.568434	0	0.606711	0.435563	0.591242	0	0	0.590861	0.482508
MER76	4.34604	3.17397	3.79348	3.66898	2.68375	4.7905	4.59823	2.72734	1.97184	4.28155	4.66685	3.05806
MER76-int	1.05371	1.29507	1.64601	1.8431	1.39347	1.94566	1.86576	1.50671	0.638946	1.27564	1.96641	1.42678
MER77	15.6041	21.724	23.8235	40.5724	25.3293	32.1762	30.9026	29.828	31.65	20.8007	37.1602	27.2313
MER77B	4.18948	6.29048	6.92424	14.9509	6.79974	14.3732	13.0467	8.41052	8.66688	9.47101	17.6973	11.7201
MER8	7.7586	9.87852	11.7888	16.3292	8.72885	17.6385	17.3872	17.024	11.7049	13.0657	25.4666	13.9904
MER81	5.10356	6.57897	7.69012	14.0731	7.00431	15.8791	16.0734	9.70782	7.63957	8.9494	16.5412	11.8502
MER83	1.90667	4.1549	4.94091	10.4213	6.32182	9.01698	9.86649	5.9315	8.47298	6.61602	9.97605	7.89817
MER83A-int	0	0	0	0.568434	0	0.606711	1.08455	0.591242	0.694506	0.613179	1.37195	0.58845
MER83B	0.481074	0.747589	1.37707	7.18329	1.18324	15.795	8.79394	2.60376	3.02805	3.04968	5.04217	3.34362
MER83B-int	0.545691	0.965967	0.736018	1.98091	0.733034	3.20092	1.97171	1.20156	1.80572	2.08106	2.90392	1.33792
MER83C	0.583732	0.49528	1.1804	1.43659	0.613691	1.24271	1.77611	0.630531	2.46133	0.636305	1.19832	1.04903
MER84	0	0.534592	0.522346	1.46415	0	2.02934	1.70056	0.667532	1.47235	1.61627	2.26401	1.45203
MER84-int	0	0.489891	0.553807	1.00251	0.481311	1.29418	1.01914	0.514953	0.444484	1.34555	1.42093	1.15206
MER85	1.10183	1.81108	1.80541	4.18574	1.47984	4.38631	4.05396	2.30775	1.36123	2.92986	4.35516	2.60284
MER87	0.624732	0.657398	0.848129	1.36114	0.902722	1.94566	2.25299	1.84963	2.08352	2.07318	2.34255	1.99401
MER87B	2.12568	1.79229	2.29621	2.84217	1.5404	1.52724	2.90256	1.46857	1.91684	2.31036	3.1928	2.70766
MER88	0.473739	0.568868	0.832251	2.04981	0.673481	1.10882	2.07989	1.12527	0.638946	0.680673	1.1508	0.968768
MER89	6.94162	8.48443	11.8987	17.2339	13.4627	14.6238	20.0662	11.3766	14.4735	13.3671	18.7526	14.6885
MER89-int	1.8117	2.44757	3.34523	6.49359	3.36738	4.08003	4.97674	2.45995	4.58374	3.94622	5.96235	4.20584
MER90	2.31599	3.2852	4.44295	7.63907	2.92682	5.38383	7.52106	4.30844	5.52827	6.18162	9.18666	5.37868
MER90a	9.06458	12.2186	14.9852	25.0876	14.0896	21.2048	23.5459	13.0256	17.2043	14.2349	22.0512	17.8348
MER91A	13.1527	17.6117	19.6017	26.1883	17.3464	31.1301	37.6011	31.5361	17.7049	30.3727	42.7594	33.7378
MER91B	4.15682	5.35949	6.39099	11.799	8.03174	10.7325	9.74922	6.31294	4.94488	7.06276	11.047	8.39485
MER91C	1.80816	2.63815	3.66468	7.74965	3.92067	9.19523	8.90615	6.80882	5.19491	5.02993	10.6789	8.03892
MER92-int	3.12518	4.34568	4.35469	9.02846	4.74933	3.56286	6.0224	4.44996	3.70589	4.98593	6.61422	5.32319
MER92A	0	0	0	0.430632	0	0	0.642355	0.553098	1.13899	0	0.59121	0.575681
MER92B	4.87725	6.11376	7.64257	14.3831	5.41532	11.9459	12.5857	6.69439	11.3066	7.18673	13.3661	9.28002
MER92C	0	0	0.423526	0.706236	0	0.774079	0.602023	0	0.416704	0.508017	0.548252	0.520746
MER92D	0.582369	0	0.633908	0.671786	0.533064	0.732237	1.04303	0.743821	0.750067	1.05296	0.922145	0.694901
MER94	8.82293	11.3272	12.3844	22.2378	10.2045	17.218	20.7905	13.0264	15.807	13.5837	25.7187	15.5559
MER94B	1.55869	2.46618	1.9005	3.84158	2.63624	3.24276	3.60212	3.48604	2.36077	3.77123	4.89577	3.15473
MER95	0.981876	2.45633	2.00358	4.11684	2.18219	2.44776	1.65346	1.01083	1.9724	1.23592	1.95667	0.990765
MER96	2.20396	2.67113	3.93746	6.39092	2.95256	6.33908	7.31857	4.06241	3.86145	3.88601	7.2487	5.20203
MER96B	3.18097	4.5219	4.59899	9.24998	4.59758	7.51066	7.72909	4.06241	6.7506	6.33331	8.72522	6.58706
MER97a	0.717141	1.01452	0.919013	1.7053	1.17422	1.61092	1.03621	1.01083	2.91693	0.983085	1.52221	1.11673
MER97b	0	0	0	0	0	0.481184	0.500507	0	0.472264	0.5212	0.620902	0.53654
MER97c	1.06153	1.35854	1.33887	1.53305	1.12028	0.98329	1.62167	1.31599	1.63903	1.23123	1.67833	1.11037
MER97d	0.751995	0.775279	0.679924	1.4986	0.997608	1.02513	1.39045	0.781966	0.861188	1.64023	1.48706	1.27247
MER99	1.56237	2.1693	3.02314	4.08239	3.60411	2.57329	2.4052	1.77373	1.24956	0.648903	2.58119	1.42728
MER9B	0	0	0	0	0	0.481184	0.44308	0.553098	0.527825	0	0.530978	0.779176
MER9a1	0.58369	1.00802	1.55057	3.33344	1.5936	3.65282	2.84504	1.65548	2.99749	1.43207	3.14339	3.06539
MER9a2	2.19786	3.23125	3.19082	6.86358	2.91117	5.52274	3.81232	2.17577	3.59032	2.34807	3.92861	3.25825
MER9a3	1.98718	3.60974	3.69994	9.79774	3.71429	12.1296	8.0734	3.37847	6.99951	3.79951	7.85071	6.74263
MERX	0.511989	1.26092	1.34409	3.49673	1.20735	2.61513	1.81392	1.65929	2.69468	2.57691	2.96202	1.87652
MIR	422.319	618.175	718.242	1392.98	639.092	1229.36	1252.64	796.768	812.074	793.979	1544.3	1073.29
MIR1_Amn	42.2474	51.135	67.2625	102.185	58.0716	92.9724	98.9169	69.1918	52.7125	56.4692	101.987	80.9919
MIR3	339.301	421.569	454.784	735.325	380.673	644.549	664.895	427.128	378.769	400.192	726.995	541.757
MIRb	570.883	796.322	921.791	1805.28	834.879	1659.92	1722.57	1104.17	1027	1078.63	2057.41	1475.5
MIRc	338.926	457.407	477.928	813.163	418.885	707.06	757.829	526.472	454.119	521.988	895.227	666.555
MLT-int	1.96122	2.22857	2.81636	5.39151	3.16042	2.86619	2.24098	1.73558	1.30567	1.29463	2.57312	1.84611
MLT1-int	0.550225	0.902363	1.13437	1.94646	0.615216	1.96658	2.62292	1.06805	1.16677	1.61092	2.54214	1.67719
MLT1A	39.3632	50.0414	53.3193	83.3941	42.1971	78.3226	82.9001	51.1333	74.4172	51.0362	91.8618	66.8726
MLT1A-int	6.99397	7.24585	8.35008	9.51421	6.24524	7.42698	6.88539	4.63458	4.13926	4.66332	9.46299	5.27644
MLT1A0	75.7473	97.0562	105.46	188.107	102.922	183.484	188.034	125.355	128.927	119.417	205.679	150.616
MLT1A0-int	2.48476	4.46489	4.37891	9.76639	3.83238	9.31364	9.2569	7.25893	5.95609	6.5333	13.2534	7.71462
MLT1A1	30.5982	39.6211	39.0196	59.2463	33.5931	49.0231	52.8119	35.2312	40.1136	38.0671	62.3173	44.3241
MLT1A1-int	4.30748	6.10108	7.52276	10.0423	6.46224	8.22198	9.73199	8.4109	4.58374	8.66689	13.918	10.2717
MLT1B	57.4044	78.3165	85.9259	157.002	80.0419	146.84	160.777	99.1903	130.551	110.04	186.072	141.532
MLT1B-int	10.5338	12.3679	12.468	14.6818	13.2678	13.7242	10.9315	8.98307	5.80607	9.92785	14.806	10.8783
MLT1C	27.5827	34.8594	39.5657	69.8072	34.8903	70.8178	69.0403	42.3028	66.1442	50.8329	77.6414	60.2769
MLT1C-int	0	0.457782	0.622722	1.11964	0.669077	0.732237	0.658373	0.743821	0.472264	0.775129	1.04465	0.813184
MLT1C2	55.0019	70.6887	83.9559	162.532	78.3583	171.261	174.454	106.813	101.927	106.207	194.766	142.897
MLT1C2-int	1.24579	2.21679	3.44886	9.68061	3.56257	10.7329	7.15605	4.74901	4.47262	5.42899	7.95171	6.60669
MLT1D	64.2556	80.4531	96.9845	171.301	90.007	173.807	197.013	131.456	147.401	136.732	223.557	167.805
MLT1D-int	2.77659	4.1857	3.82728	8.56406	3.98289	8.47303	13.2714	9.47895	6.08387	11.3528	17.4157	10.43
MLT1E	1.30099	2.26004	2.646	5.13313	2.42122	7.99603	6.10521	3.98574	6.20611	5.46087	9.39296	6.44596
MLT1E-int	0	0	0	0	0	0	0	0	0	0	0	0
MLT1E1	5.80658	6.37544	7.12604	10.352	5.6858	8.43119	10.1228	8.75382	6.195	6.31971	12.5654	8.7023
MLT1E1-int	0	0	0	0	0	0	0	0	0	0	0	0
MLT1E1A	7.97978	9.6269	11.7605	22.3915	10.4301	23.019	22.1672	14.3363	14.9613	15.8396	28.4687	20.3025
MLT1E1A-int	5.7228	4.71412	4.25237	2.82357	2.81149	2.61513	3.56611	3.14694	1.02787	2.30679	3.32923	2.48771
MLT1E2	20.6739	24.7686	30.7774	47.9617	28.3217	47.8732	41.1529	32.5202	27.6075	27.7158	51.9788	35.5279
MLT1E2-int	4.8124	4.79646	5.88358	6.75334	5.3747	5.12357	5.5011	4.00786	2.68579	3.00196	5.54524	4.92588
MLT1E3	5.06853	6.43356	7.78259	14.4462	6.46182	13.8355	14.7592	9.97483	10.4543	8.52796	15.4164	11.4934
MLT1E3-int	3.74229	4.05287	3.9461	5.60407	3.6589	4.80682	2.4585	1.46971	1.66237	1.94164	2.55468	1.59567
MLT1F	35.9651	46.1152	50.8846	79.5546	49.5539	71.7375	80.6194	51.2283	45.8535	50.2542	82.8487	66.1918
MLT1F-int	7.9466	8.24178	9.96513	18.0004	8.94225	8.93329	10.7846	7.72391	7.0284	7.58961	13.0347	8.67139
MLT1F1	12.2788	15.303	18.1256	31.8719	16.1644	33.431	34.8663	20.9601	22.1131	21.153	36.8198	28.065
MLT1F1-int	1.89406	2.61366	2.61609	6.32168	3.04702	5.87882	6.04863	4.63458	3.91702	5.29499	6.97899	4.87078
MLT1F2	33.0543	43.9367	48.1857	81.4897	50.3945	73.597	71.9149	51.4774	48.8582	48.466	79.7814	62.4243
MLT1F2-int	12.8165	11.6678	15.1805	21.1881	13.0259	7.97092	8.24914	7.38137	4.52763	4.95961	10.3276	6.65018
MLT1G	9.03537	12.9417	16.8558	26.2169	16.4998	26.1513	28.2051	29.894	18.0849	26.7619	39.3056	28.6231
MLT1G-int	1.29339	2.14136	2.95223	8.31981	2.8077	3.70303	4.09393	2.65105	1.86128	2.68674	5.39808	3.33063
MLT1G1	12.383	17.3553	19.705	32.163	19.1027	38.9897	41.3604	28.1248	23.6582	36.5616	50.8434	37.5821
MLT1G1-int	6.60881	8.4686	6.80154	5.35706	5.31962	5.66961	7.977	6.23703	6.63948	6.18469	8.64504	6.39974
MLT1G3	9.20382	11.4991	14.9148	32.2798	13.9322	27.3442	30.3795	20.9525	17.0843	16.2696	34.032	25.3834
MLT1G3-int	1.86365	2.09706	1.7947	2.73882	1.71112	3.41013	3.24622	2.49848	1.25011	2.80761	4.11986	2.36807
MLT1H	27.8891	41.381	50.2579	80.8971	48.2324	85.0412	88.6258	57.9952	48.7404	56.6457	95.953	76.2165
MLT1H-int	2.80388	4.15133	4.79332	6.35613	3.91735	5.75329	6.20784	4.63458	3.62532	5.38035	8.47035	5.85447
MLT1H1	9.87562	12.8276	15.9552	29.6888	16.4907	33.7377	30.8128	22.4024	25.3567	28.6518	39.5755	29.4668
MLT1H1-int	1.28578	1.42537	2.18136	2.2541	1.68367	4.66582	3.15819	3.02792	2.12519	3.28303	6.16409	2.83703
MLT1H2	8.64009	13.1366	14.6873	26.8704	12.6539	29.5071	28.8376	19.8444	17.3471	20.1314	35.6539	25.1126
MLT1H2-int	0.573268	1.05197	0.979565	2.49767	1.00957	3.11724	2.59923	1.96445	1.36123	1.73098	3.73934	2.14653
MLT1I	25.1026	31.7804	40.3662	73.0555	36.5186	75.7083	72.61	55.9353	41.8759	51.407	87.4846	59.8781
MLT1I-int	1.29519	1.83078	2.22839	5.69674	1.665	5.02106	4.12514	3.20034	2.80581	3.23484	6.03463	3.14375
MLT1J	63.248	80.8135	97.435	147.961	91.7032	154.574	159.452	120.53	104.539	112.134	185.555	143.693
MLT1J-int	6.09882	6.96777	6.66833	9.0257	5.28199	10.6764	9.07132	5.85521	4.996	9.1952	11.5445	7.90211
MLT1J1	15.4635	19.0192	23.3655	33.951	21.9016	30.5004	38.2781	30.8114	24.4183	26.9633	39.8179	30.9453
MLT1J1-int	4.21287	6.22097	9.476	9.14662	12.7348	11.3183	14.2189	12.5305	11.8066	8.33676	13.2355	10.6371
MLT1J2	24.8647	27.4744	32.3037	42.6388	28.7242	43.7652	46.4491	41.9858	33.0846	44.2708	56.8736	47.2716
MLT1J2-int	1.81929	2.48202	3.54337	10.2018	3.44377	5.37671	7.53982	5.42036	3.52809	5.08239	8.76665	6.11651
MLT1K	44.8045	61.7949	74.6986	135.616	64.7779	140.123	145.593	90.6317	81.5517	90.3112	160.21	114.999
MLT1K-int	0.513831	0.483218	0.531496	1.11964	0.42766	1.94566	1.30483	0.553098	1.43068	0.888853	2.19216	0.956372
MLT1L	42.0474	52.5563	57.2314	90.7721	53.1372	93.1753	95.0122	65.9586	61.2788	71.6515	118.041	84.6902
MLT1L-int	0.585498	0.428353	0.584822	0.533984	0	0.815921	0.568854	0.553098	0	0	0.741204	0.416262
MLT1M	3.74954	7.04401	7.42893	17.742	7.87153	16.172	13.8929	9.05936	8.08405	9.88578	17.4201	10.0277
MLT1M-int	0	0	0	0	0	0	0	0	0	0	0	0
MLT1N2	11.6972	15.4387	18.8456	36.1211	16.7146	35.6909	34.8003	19.3584	19.1684	24.39	37.1812	27.4621
MLT1N2-int	0	0	0	0.637335	0	0	0.575755	0	0.472264	0	0.433266	0.47063
MLT1O	12.0351	15.6205	17.6294	31.0203	14.6746	35.0846	29.265	20.5092	18.1588	20.5283	40.2502	27.7601
MLT1O-int	0	0	0	0	0	0	0	0	0	0	0	0
MLT2A1	5.75501	7.22632	9.27643	18.0814	7.83842	15.1724	16.6225	11.5246	7.20897	10.7714	17.2074	12.4418
MLT2A2	15.2057	18.1378	20.0636	31.3014	17.5544	26.5685	29.1682	24.1612	18.0383	22.5439	34.6969	27.5353
MLT2B1	9.58437	11.526	13.6205	22.4208	11.4154	16.7297	22.2734	19.0338	10.9171	18.3072	27.3202	18.9168
MLT2B2	4.03788	6.08323	6.50712	13.2979	7.36717	10.4045	12.6371	7.63466	13.6679	9.88338	12.9198	10.1601
MLT2B3	30.2993	37.552	39.8188	56.6901	42.4984	48.8599	48.0109	46.6788	33.9008	44.0172	57.0842	51.011
MLT2B4	23.3548	37.3011	45.3993	69.8616	48.9412	50.0495	78.7729	39.7086	28.1081	35.2233	63.3866	50.3225
MLT2B5	0.775786	1.0411	1.37391	2.04981	0.966662	0.774079	2.44201	2.26961	1.80572	2.4159	2.45244	1.90143
MLT2C1	4.42368	5.53759	6.02332	11.6822	6.21828	11.1547	14.0034	8.54822	9.30638	8.86278	17.0747	11.9702
MLT2C2	2.77876	3.25182	3.88673	7.18294	3.23076	6.88303	7.4391	4.63458	3.91702	3.3366	8.8514	6.11815
MLT2D	13.689	16.5637	17.6784	29.6878	18.1452	26.4547	28.7512	22.2574	21.4741	23.0765	34.8444	26.3362
MLT2E	1.71625	1.99068	2.49281	4.46135	3.06126	5.02106	6.68105	3.71911	5.22269	3.22703	5.46844	4.95234
MLT2F	9.87359	10.9654	11.7308	17.1667	12.3669	16.7452	18.7096	21.8077	8.88412	20.5167	26.2283	20.3587
MST-int	0	0.951624	1.01787	2.87628	0.773339	2.90803	2.40811	1.12489	1.19455	0	2.6797	1.76728
MSTA	52.0721	66.8464	84.5289	156.12	70.4611	142.194	166.629	95.5772	111.505	122.005	161.784	129.23
MSTA-int	86.0334	96.4184	120.256	141.705	114.054	103.868	214.695	176.45	123.907	188.536	281.027	244.928
MSTA1	5.34184	8.52325	10.2785	11.8899	6.69354	5.75287	11.9905	8.70805	4.97322	8.2598	11.321	8.52852
MSTA1-int	0	0	0	0	0	0	0	0	0	0	0	0
MSTB	26.7874	35.6901	44.7378	83.1147	39.2274	69.9697	79.1075	46.5964	48.6988	49.1728	79.9256	60.66
MSTB-int	8.87192	12.3007	13.6569	24.9078	18.1696	23.5571	22.6143	20.1213	10.6398	17.394	29.4503	18.5672
MSTB1	19.2967	20.0388	22.1432	45.5967	19.0914	36.4437	39.0727	23.068	27.0657	25.0908	39.9977	29.3484
MSTB1-int	1.65732	1.98535	2.89151	5.39151	2.52826	5.08424	5.3394	5.77892	2.30576	4.69584	6.8443	4.34428
MSTB2	7.15673	10.5124	9.01524	16.209	7.37862	17.1063	14.5144	8.98269	9.80643	10.0941	16.8999	12.468
MSTB2-int	0	0	0	0.91294	0	1.44355	1.34779	0.514953	0.805627	1.58504	1.71473	0.861253
MSTC	12.076	15.782	17.3313	26.2851	13.5733	28.2644	28.733	23.8591	22.752	22.8813	39.4014	29.9764
MSTC-int	2.39196	2.66054	4.08905	8.07866	3.52879	6.21356	7.0528	4.71087	2.36132	3.51847	7.0964	4.55912
MSTD	28.0789	38.5512	39.4042	67.9875	33.9509	67.0411	65.4039	47.5847	48.6977	50.8466	81.5335	56.9682
MSTD-int	18.0686	21.4932	24.8938	31.9184	20.2002	16.0465	18.5138	16.6501	9.53974	11.8236	20.2085	13.7634
MamGyp-int	7.15748	6.74074	7.83547	10.1457	9.23232	7.97929	11.6923	17.6801	3.63921	10.8417	15.9903	12.568
MamGypLTR1a	1.23433	1.77088	2.11028	5.77012	2.39755	3.95408	4.67916	3.29951	2.97249	4.39347	5.24708	3.84174
MamGypLTR1b	2.51443	3.26309	3.42511	8.69877	4.19288	6.38051	6.72875	4.10055	3.97313	3.16146	7.5629	4.5855
MamGypLTR1c	1.15736	1.64746	1.67555	4.01349	1.52138	3.91224	4.94556	2.53662	3.52809	2.7193	5.39653	4.35054
MamGypLTR1d	1.88841	2.32976	2.70345	3.73789	3.73415	4.41434	6.16466	7.68615	4.02814	4.22439	8.41185	5.81256
MamGypLTR2b	0.929999	1.43611	1.75241	1.73975	2.2422	2.94987	4.1925	4.59643	3.97258	2.58833	4.60844	4.08631
MamGypLTR2c	0.993846	1.49683	1.84781	2.63547	1.20104	3.18	4.20916	2.87992	3.02805	3.2713	4.77847	3.3238
MamGypLTR3	1.83757	2.47864	2.34177	3.68621	2.43942	6.1713	5.98871	4.67272	4.52818	2.97871	4.9111	4.29848
MamGypLTR3a	3.14567	3.9098	4.9144	6.32133	3.48058	4.60933	7.18212	5.47376	3.19417	5.5634	9.13288	6.46679
MamGypLTR4	0.973242	1.18322	1.15713	1.39525	0.887317	1.40171	2.20321	1.31599	0.972309	2.06374	2.56445	2.15057
MamGypsy2-I	2.18644	3.64482	3.70141	8.49206	3.23569	6.21356	7.40664	5.13046	4.25038	5.81861	10.861	6.58935
MamGypsy2-LTR	0.798571	0.755674	1.11023	2.32541	0.742606	1.9875	1.2644	1.20156	1.52791	1.68441	2.6182	1.45729
MamRTE1	28.244	38.378	36.6189	61.8301	36.0297	58.5371	58.6463	40.8526	37.7445	42.1361	73.991	50.8045
MamRTE2	0	0	0	0	0	0	0.474386	0.553098	0.861188	0.59153	1.07475	0.630795
MamRep1151	2.23031	3.777	3.8811	6.90734	3.91991	3.975	4.86155	3.10879	4.6393	4.58541	6.05516	3.80572
MamRep137	8.37161	13.2333	13.7926	25.2347	13.1994	20.4248	21.1207	14.1414	11.6955	12.7682	27.8054	17.7283
MamRep1527	1.94218	2.2412	3.03792	5.36395	2.21148	4.33066	6.10535	3.52838	2.528	4.91124	8.42407	5.11951
MamRep1879	2.57238	3.44509	3.78627	7.28629	3.51468	6.88303	9.52126	6.16036	5.25047	5.9668	8.74039	6.60328
MamRep1894	1.56164	1.3837	2.24613	2.94552	2.07084	1.9875	2.78878	0.82011	0.916748	1.47366	2.57776	1.46159
MamRep38	5.03974	8.91406	9.84103	19.303	7.60642	19.7779	18.7495	12.4214	12.2983	13.3323	20.1637	15.7429
MamRep4096	1.0721	1.8783	2.2267	5.85074	2.39488	3.70303	4.39575	2.57477	4.30594	2.60935	6.03203	3.54141
MamRep434	5.73735	10.1395	11.8786	20.6531	12.3983	14.2682	16.6017	12.4733	14.7508	15.5122	19.7709	14.7426
MamRep488	1.59839	1.80026	2.8795	3.94459	1.88024	2.86619	4.2162	2.72734	2.63912	1.677	3.71793	2.90254
MamRep605	13.7025	17.1544	20.1206	32.0387	16.8362	25.5488	25.2185	18.9384	19.624	17.5448	33.6393	24.5476
MamRep605b	7.93017	9.57635	12.8126	22.4618	10.4988	16.9599	16.5065	15.5184	8.15795	11.4327	23.9325	14.5151
MamSINE1	17.5318	21.5976	25.7314	43.5093	21.1681	37.5533	39.2094	34.5522	26.069	32.6724	55.19	39.2279
MamTip1	0.835236	1.27693	1.67478	3.32448	1.47949	3.0754	3.6544	2.49848	3.19473	2.24304	4.81014	3.67727
MamTip1b	0.807263	1.15541	1.031	1.87756	0.901101	3.24276	2.95172	1.85002	1.13899	2.22332	3.13073	2.11421
MamTip2	12.2562	15.7967	16.483	25.0797	15.7423	21.0047	26.3156	22.6007	12.1955	19.8468	35.7684	23.4106
MamTip2b	25.1346	36.258	38.3359	57.9414	43.0435	34.4854	45.1721	31.9317	26.7363	36.3952	49.1647	41.7457
MamTip3	1.56016	2.13441	2.07169	4.5647	1.90029	4.16329	5.26783	3.56653	4.13926	4.55789	6.95646	4.48251
MamTip3B	0.846795	1.28552	1.34962	2.87662	0.924664	1.82013	2.00067	1.92631	2.02796	1.87288	3.19707	2.40739
Mam_R4	0.915757	1.82264	2.10177	3.85846	1.76894	3.66119	2.69174	2.57477	2.91693	1.84766	3.94329	2.84751
Merlin1_HS	0	0	0.406975	1.22299	0	0.648553	0.547115	0	0	0	0	0
ORSL	5.63888	3.86181	3.74048	5.17895	3.20017	5.71856	6.96176	4.38664	12.0011	8.66691	8.11813	6.06285
ORSL-2a	0.816926	1.64652	2.17188	2.44599	2.56086	1.90298	3.16542	3.26099	9.27805	4.92345	5.55334	4.34369
ORSL-2b	1.18587	1.60858	1.73508	3.42783	2.26079	3.70303	4.60963	3.18508	2.69468	3.46437	4.32203	3.53735
OldhAT1	8.60582	12.1448	11.8381	22.2837	10.0008	19.2829	21.3868	17.6423	11.586	17.0373	27.7449	18.7547
PABL_A	1.36328	2.16181	2.61557	5.04666	2.57533	3.93316	4.75828	1.77373	2.97249	2.53908	5.55586	3.3939
PABL_A-int	2.93167	3.49823	5.43977	10.0251	5.77214	5.98342	5.59484	4.19591	4.41706	3.23954	5.88108	3.77313
PABL_B	5.29153	4.89883	6.70911	6.76919	6.22217	14.2929	8.02949	6.48459	6.08387	4.7197	8.10837	6.28659
PABL_B-int	3.34531	4.3366	4.52979	7.71968	3.24782	10.335	4.47896	3.67142	2.44466	3.91648	7.30108	3.76077
PRIMA4-int	3.31734	5.37513	6.58398	13.3623	7.45065	10.9915	9.52136	6.31256	6.04665	7.03781	10.9643	8.66918
PRIMA41-int	3.47781	4.39252	5.9422	9.47942	6.10417	9.37264	7.04505	3.47116	3.80589	3.27758	7.72383	4.89967
PRIMA4_LTR	0.823518	0.996997	1.47926	3.25558	1.75254	2.53145	2.89379	1.54486	2.41688	1.56931	3.06397	2.11232
PRIMAX-int	0	0	0	0.430632	0	0	0.428773	0	0.416704	0	0.458668	0
Penelope1_Vert	2.34879	4.37962	3.88636	5.59822	2.96307	4.43527	4.22271	2.759	2.79636	3.9567	5.02217	3.53376
Plat_L3	10.9687	16.5213	17.1222	34.9928	16.4357	23.6391	27.421	18.5143	15.8292	20.0772	34.0443	22.4654
PrimLTR79	0.581952	0.688832	0.772807	1.05074	0.721344	1.69461	0.939137	0.934544	0.750067	1.28502	1.36587	0.949351
Ricksha	2.34127	2.98698	3.93464	8.21095	4.99939	5.36918	4.8115	2.73612	3.91757	3.53466	6.7363	4.80969
Ricksha_0	1.37297	2.23596	3.32193	5.83937	3.96063	6.93533	4.04519	3.12786	3.98091	3.5781	4.98495	3.71267
Ricksha_a	0	0	0	0	0	0	0	0	0.750067	0	0	0
Ricksha_b	2.48977	2.82144	3.22316	5.87416	3.52303	6.21356	4.20587	1.8874	4.13815	1.95497	4.48925	3.49343
Ricksha_c	1.13607	2.09158	1.86206	2.77293	2.25783	5.25746	4.41918	2.47902	4.3615	3.6	5.72468	4.19828
SVA_A	8.0995	11.2472	12.8841	23.2397	12.0223	29.4523	26.6741	16.6475	16.6187	13.4222	21.0657	19.1235
SVA_B	17.1968	20.2713	26.7643	38.4189	21.3138	69.2784	45.5199	30.5043	23.7616	24.5451	37.4738	29.2109
SVA_C	11.8878	16.7307	18.4431	28.3942	17.927	55.3195	56.1694	40.6588	43.0666	31.8516	42.8073	37.093
SVA_D	55.61	66.5909	85.1364	112.904	70.4158	181.155	192.724	136.424	119.535	123.016	138.063	137.913
SVA_E	5.39265	8.79805	9.23858	15.8907	7.21504	26.1702	27.5201	19.5621	16.2337	16.0846	19.4547	21.1843
SVA_F	8.88535	11.9092	14.4225	22.4814	14.1689	37.9387	36.3777	34.8467	21.9258	22.7815	27.837	25.2349
THE1-int	0	0	0.485324	0.919485	0	1.01802	1.44345	1.07072	0.472264	0.678732	1.3064	1.08589
THE1A	8.77462	10.5013	12.2995	20.0912	10.198	14.6732	16.2976	10.8476	13.0901	14.3783	17.221	12.2323
THE1A-int	34.375	42.0281	44.2792	69.4909	44.1777	82.77	82.4994	61.1463	38.9374	58.2217	95.6348	66.4181
THE1B	47.8029	64.7484	72.8192	138.166	62.9274	138.753	146.271	89.2757	106.17	101.801	161.993	116.116
THE1B-int	60.4157	82.6342	101.485	193.517	90.828	164.221	156.978	98.7878	77.4524	113.677	184.984	131.353
THE1C	23.7515	28.4973	31.8327	57.4711	28.6096	57.6505	57.5395	34.939	38.329	38.156	64.4252	44.8131
THE1C-int	89.3246	51.5501	62.4985	64.3519	29.9147	219.927	253.987	213.152	284.036	83.2376	131.866	109.763
THE1D	25.004	34.8919	41.055	74.2771	34.0014	73.5681	80.5404	44.9371	56.0272	57.9852	90.3935	63.1921
THE1D-int	21.6287	31.4031	36.0487	54.5718	32.1414	57.3375	66.6424	46.4041	30.2877	53.1921	73.5799	53.3395
Tigger1	148.98	201.86	228.602	407.352	198.484	313.591	267.453	183.205	199.942	195.909	333.461	208.255
Tigger10	4.93336	10.3504	9.57083	17.5009	8.47376	16.3394	19.08	14.8192	14.4735	13.0852	24.7259	15.7592
Tigger11a	1.97274	2.96175	3.19168	4.32355	2.7573	3.45198	3.74689	3.18508	3.97258	3.33663	6.21492	3.60229
Tigger12	2.76225	2.45225	3.91208	8.78145	2.58652	6.01271	6.40242	4.6979	5.19491	5.21674	10.0286	6.21449
Tigger12A	0.982322	1.95718	2.40817	5.59822	2.17395	4.58171	5.26541	3.07065	2.75024	3.34286	6.20663	3.81666
Tigger12c	1.55239	2.13068	3.29416	7.25184	2.83543	5.79513	6.71244	4.11314	4.13926	4.01731	9.00956	5.64622
Tigger13a	10.1639	17.0718	18.6422	34.2721	19.155	32.49	35.5607	28.2843	34.5297	28.1595	48.6089	34.8043
Tigger14a	2.09716	4.11994	4.54901	13.2462	4.70707	6.79935	6.92538	7.07584	6.86172	6.42523	11.738	7.75298
Tigger15a	26.395	33.2369	33.2853	71.3264	34.1095	44.3987	46.9102	36.7715	30.0343	39.607	66.5879	42.317
Tigger16a	7.29556	9.77896	8.25764	16.2266	8.93686	14.6029	15.0334	8.71491	10.1398	12.721	17.8972	10.5606
Tigger16b	2.18178	4.77363	4.76362	10.7313	4.3347	8.95338	8.50396	5.45507	7.08396	6.1686	12.0886	7.89053
Tigger17	4.2318	3.63672	3.58475	4.66805	3.56671	4.03777	2.88444	3.10879	4.69486	3.936	3.83425	3.54546
Tigger17a	8.27822	13.5189	14.6634	33.7953	12.3251	31.6029	28.7621	16.9934	17.751	17.8117	36.5133	21.165
Tigger17b	0	0	0	0.430632	0	0.439342	0.491013	0	0.583385	0	0.593752	0.490526
Tigger17c	0.41534	0.925436	0.939219	2.61824	0.837323	2.24692	1.60639	1.08712	1.25011	1.00126	2.45066	1.45996
Tigger17d	1.39668	2.34271	1.99683	4.01349	2.23329	3.11724	3.53723	3.52838	1.86128	2.48973	5.70252	3.40372
Tigger18a	3.74635	5.58773	5.70544	11.4548	5.23017	9.5467	9.28578	8.85567	8.17628	7.95284	15.3118	8.90136
Tigger19a	10.3117	17.4031	17.8159	33.9855	19.8603	30.8933	32.2754	22.3207	19.8168	23.1549	43.7277	29.8517
Tigger19b	29.8988	33.7274	34.372	51.6524	30.8243	42.6945	40.7317	37.1308	31.7306	32.4792	52.9849	40.4403
Tigger1a_Art	1.17284	2.04053	2.14733	3.87569	2.50535	1.96658	2.91764	1.85002	4.25038	1.65747	2.83093	2.64254
Tigger1a_Mars	0	0	0	0	0	0	0	0	0	0	0	0
Tigger2	31.5474	45.1364	52.7247	86.5226	50.9185	65.3988	63.0648	48.0436	45.1151	46.5674	79.1578	49.7068
Tigger20a	5.19353	8.38325	6.74751	13.0258	5.74923	11.7786	11.3997	9.53998	6.6117	10.0734	13.9156	8.57208
Tigger21a	0	0.517239	0.542688	2.29096	0.479861	1.52724	1.88155	0.705676	0.750067	0	2.08804	0.99521
Tigger22N1	2.8794	4.40192	4.81573	7.94085	4.89691	6.92487	8.04678	5.05417	5.41715	6.7599	10.0816	6.41584
Tigger23a	0.750727	1.27943	1.36089	2.78016	1.27231	2.15487	2.18328	1.96445	2.06129	2.0301	3.43938	2.22063
Tigger2a	10.236	15.6885	17.0452	37.5332	14.6474	25.9208	29.7938	18.0611	24.6961	15.3987	31.5666	21.2193
Tigger2b_Pri	9.98473	16.2794	15.3777	23.4784	13.7938	17.2185	15.3468	13.1405	15.6958	14.2356	21.8909	13.2441
Tigger3	5.49667	7.31364	11.0915	20.0675	9.2574	13.3476	10.9898	5.96964	8.52854	4.9616	12.7065	9.37116
Tigger3a	19.1257	28.9435	34.2051	67.4077	32.9621	59.8342	54.473	36.1234	53.7548	31.0238	74.1154	54.7853
Tigger3b	25.0789	39.9225	46.8351	97.678	43.625	67.8905	66.1406	40.0771	66.8704	38.6558	85.3334	55.8167
Tigger3c	6.49573	9.92127	11.4976	26.4598	9.28935	18.4294	19.1511	11.5929	9.75531	10.36	22.4792	14.9843
Tigger3d	0.604616	0.904665	1.01705	1.86584	0.788604	2.13395	1.97498	1.40487	1.80572	0.883013	2.94861	1.54335
Tigger4	9.91203	12.0635	13.7102	25.8889	11.8727	17.8457	15.5124	9.17379	11.0288	10.967	21.0066	13.0577
Tigger4a	10.5537	20.9174	20.0034	46.5775	19.391	35.4758	25.1716	18.2904	22.8809	17.0525	36.1771	21.1858
Tigger4b	13.6742	20.6211	21.2441	33.1432	19.7287	21.8349	21.7788	14.2661	25.8495	16.6164	37.1347	20.1332
Tigger5	1.72305	2.06333	1.54409	3.42783	2.28149	3.05448	2.56488	1.9839	1.49958	2.3099	3.80154	2.5104
Tigger5b	4.6726	7.51773	7.0827	10.8003	6.82148	7.71987	9.47438	6.52274	8.55632	6.45358	13.1298	8.80192
Tigger6	0.621182	1.10579	1.04819	2.29096	1.68495	2.19671	2.38759	1.73558	3.47253	1.42333	3.19789	2.53209
Tigger6a	3.72933	5.38958	5.36303	8.87067	4.27407	10.6484	10.088	6.56699	9.97367	6.7629	12.9083	8.68258
Tigger6b	0	0	0.680311	1.6364	0.414779	0.690395	1.17137	0.553098	0.638946	0.972109	1.02622	0.624194
Tigger7	12.6129	14.4681	16.5252	26.9552	15.145	22.6157	18.6949	12.0392	12.3205	11.7821	23.1359	14.9491
Tigger8	3.08497	4.82511	3.85093	8.18201	3.13108	7.25961	6.75169	3.64282	9.75087	6.02772	10.1034	5.97978
Tigger9a	2.37072	3.4167	3.57069	7.21739	3.25843	7.09224	6.30017	3.79539	5.13935	4.45664	9.64221	5.44859
Tigger9b	3.8349	7.11603	6.64354	10.9725	4.60863	10.1049	9.21403	5.43562	8.52854	6.486	12.4589	7.10165
UCON100	0	0	0	0	0	0	0	0	0	0	0	0
UCON105	1.46053	1.71992	1.84753	4.66805	1.93836	3.32645	4.2059	2.95621	1.30567	3.27305	4.9293	3.83995
UCON11	0	0	0	0	0	0	0	0	0	0	0	0
UCON14	0	0.481016	0.449528	0.706236	0	0.523027	0.490724	0.553098	0	0	0.573954	0.493997
UCON2	0	0.696032	0.783698	2.0567	1.04256	0.958185	0.663334	0	2.48355	0.944517	0.806618	0
UCON21	0	0	0	0	0	0	0	0	0	0	0	0
UCON23	0	0	0	0	0	0.523027	0	0	0	0.731641	0	0
UCON29	0	0	0.520558	1.18854	0.4812	1.06697	1.18315	0.667532	0.694506	0	1.21452	0.791983
UCON33	0	0.698377	0.432263	4.25464	0.4055	0.648553	0.574948	0.438664	0.638946	1.09394	0.961769	0.617081
UCON34	0.646255	1.11277	1.38771	2.15316	1.39644	1.94566	1.51985	0.629387	1.63903	1.23807	1.70625	1.35741
UCON37	0.50242	0.585717	0.722153	1.73975	0.775733	0.899606	1.11397	0.858255	1.02787	0.576541	1.58324	1.14734
UCON38	2.20044	1.89181	1.96237	3.42783	1.31249	2.2804	1.63426	1.12527	1.25011	2.22327	2.67571	1.55165
UCON39	0	0	0	0	0	0	0.561015	0	0	0.882758	0.57464	0
UCON40	0.63927	0.790366	0.567662	1.32635	0.466773	1.27618	1.23089	1.16341	0.916748	1.71892	1.83507	1.2449
UCON44	1.77299	3.14422	2.34099	3.97904	2.70635	3.03355	3.97981	2.72734	3.30585	3.58357	5.39343	3.2276
UCON49	0	0.457595	0	0.602885	0	1.10882	0.74302	0	0.527825	1.54571	1.00951	0.683453
UCON51	0	0.508724	0.4944	0.637335	0	0	0	0	0	0	0	0
UCON55	1.68619	2.18574	2.26803	2.72159	1.53206	1.90382	1.40333	1.04898	0.888968	1.63418	2.3052	1.72857
UCON58	0.717156	0.778264	0.901775	1.67085	0.657749	1.06697	0.713765	0.438664	0.583385	0.455808	0.881427	0.632716
UCON62	0	0	0	0	0	0	0	0	0	0	0	0
UCON69	0	0	0	0	0	0	0	0	0	0	0	0
UCON7	0	0	0	0	0	0	0	0	0	0	0	0
UCON73	0.576598	0.892043	0.748451	1.3949	0.509931	1.35987	0.94498	0.591242	0.527825	0.566932	1.22182	0.860119
UCON78	0	0	0	0.94739	0	0.648553	0.630839	0.438664	0.472264	0.610184	0.752566	0.406471
UCON8	0	0	0.501641	0.809588	0.488987	0.564869	0.613836	0.781966	0.527825	0.539585	0.723427	0.490017
UCON80	0	0	0	0	0	0.418421	0.43162	0	0.444484	0.592817	0.79912	0.746338
UCON81	0	0	0	0	0	0	0	0	0	0	0	0
UCON83	0	0	0	0	0	0	0	0	0	0	0	0
UCON86	0.672138	0.772284	1.24171	0.671786	0.742464	0.732237	0.752898	0.476808	0.416704	0.593523	0.687647	0.595882
UCON89	0	0	0	0	0	0	0	0	0	0	0	0
UCON97	0	0	0	0	0	0	0	0	0	0	0	0
UCON99	0	0	0	0	0	0	0	0	0	0	0	0
X10b_DNA	1.02124	1.43125	1.59754	2.2162	1.53661	1.4787	2.16982	1.37321	0.972309	1.54772	2.33554	1.53297
X11_DNA	0	0.769563	0.746705	1.58473	1.01129	1.34564	1.52672	1.0238	0.944528	1.32885	1.72045	1.18173
X12_DNA	3.95186	6.28383	6.31863	11.4031	6.33459	10.8158	11.7066	13.084	7.08341	11.0714	18.0503	11.6602
X12_LINE	1.2023	1.23321	1.58317	1.67085	0.798824	1.4854	1.90281	2.3459	0.694506	0.815963	2.02109	1.34004
X13_LINE	0.640491	0.731034	0.70187	1.08519	0.466633	0.98329	0.81776	0.82011	1.52791	0	1.54346	0.951527
X15_LINE	0.699489	0.858466	0.921291	1.64811	0.866515	2.23855	1.11832	0.514953	0.638946	2.47869	1.19793	1.12689
X17_LINE	1.02155	1.71159	1.57947	5.46041	1.17081	2.90803	3.10206	2.6892	1.52791	1.65283	3.8451	2.36022
X1_DNA	1.6173	2.51334	2.58958	5.68469	2.51257	7.09224	5.57426	3.24268	2.72135	3.35299	7.00746	4.03389
X1_LINE	0	0	0	0.568434	0	0	0.460584	0	0	0	0	0
X1_LR	0	0	0	0	0	0	0	0	0	0	0	0
X20_LINE	0	0	0	0.809588	0	0.439342	0.909974	0	0.527825	1.04196	0.859921	0.507443
X21_LINE	0	0	0	0	0	0	0.428575	0	0	0	0	0
X22_DNA	0	0	0	0	0	0	0	0	0	0	0	0
X23_DNA	0	0	0	0	0	0	0	0	0	0	0	0
X24_DNA	0.460183	0.865658	0.823889	1.11964	0.667593	1.65276	1.9497	1.12527	1.02787	1.12233	2.3872	1.55094
X24_LINE	0.987681	0.939603	1.03856	2.11871	0.923578	2.57329	1.75066	1.2397	0.916748	1.66607	1.94869	1.43693
X26_DNA	2.57238	3.79174	2.99587	7.78548	2.95979	5.61354	6.99116	4.60254	4.69431	7.1034	9.4226	6.56002
X2_LINE	0	0	0	0.91294	0	0.774079	0.849672	0.514953	0	0.497947	1.17209	0.633241
X2a_DNA	0.859794	1.37607	1.84061	1.4297	1.59029	1.02513	1.962	3.18508	0.805627	1.53504	2.96401	2.09392
X2b_DNA	0	0	0	0.809588	0	0	0.453524	0	0	0	0.456158	0
X30_DNA	1.25727	2.48618	2.85327	5.52897	2.77834	4.07961	4.53728	4.1387	2.86137	2.94475	5.94952	4.6596
X32_DNA	1.24545	2.90733	2.68427	3.73789	2.87295	2.36408	3.25998	3.26137	1.63903	2.68727	4.02459	2.6194
X33a_DNA	0	0	0	0	0	0.481184	0	0	0	0.444733	0.4941	0
X34_DNA	0	0	0	0	0	0	0	0	0	0	0	0
X4a_DNA	0	0.681212	0.439123	0.844039	0.44821	0.753158	1.06588	0.476808	0.416704	0.722807	1.10215	0.830328
X4b_DNA	1.18769	1.96281	2.04607	4.6336	2.09895	3.70303	3.59501	1.77373	3.30585	3.20102	6.33187	3.18384
X5B_LINE	0	0	0	0	0	0	0	0	0	0.872325	0.41746	0
X5a_DNA	1.58719	2.63315	2.43144	4.78863	2.48588	2.42684	2.59912	2.00221	1.38901	1.78412	3.94332	2.31645
X6A_LINE	2.65445	3.652	4.0483	9.86423	3.49665	3.73776	4.48334	3.29303	3.51865	2.77798	5.79025	3.83276
X6B_LINE	1.82595	3.26541	2.55657	4.40381	2.92755	5.10056	5.25268	2.87992	2.47244	4.25978	5.9101	3.75233
X6a_DNA	3.808	5.9318	4.91026	7.56775	4.36064	4.84323	6.47271	4.17989	7.88015	7.30005	8.8225	5.77208
X6b_DNA	1.83651	3.76728	3.43582	6.59694	3.57061	3.66119	6.52021	2.99436	3.47253	7.16788	7.87301	4.20045
X7A_LINE	3.32245	4.51709	4.33395	8.45727	3.93231	5.01059	5.74667	3.27396	3.62088	5.68959	6.86567	4.31579
X7B_LINE	2.62624	3.2827	2.64025	4.66771	2.13551	4.64448	4.7384	3.22322	2.80581	3.29227	6.08297	3.46473
X7C_LINE	0.990589	1.66541	2.04382	6.02024	2.57045	4.88507	3.72793	1.50671	1.58347	2.44876	4.52008	2.79049
X7D_LINE	0	0	0	0	0	0	0	0	0	0	0	0
X8_LINE	0	0	0	0	0	0	0.798134	0.476808	0.472264	0	0.668982	0.481181
X9_LINE	0.830837	0.959518	0.862733	2.06118	1.05457	1.68791	1.9923	1.50671	1.36123	1.6079	2.57085	1.41322
X9a_DNA	1.75519	2.12769	1.93974	3.73789	1.94667	3.32645	3.56472	3.0325	1.08343	4.05163	4.79508	2.8918
X9b_DNA	3.35679	3.31767	3.93358	6.51116	4.16716	4.22605	4.68821	3.43302	2.75024	4.2162	5.35847	2.98094
Zaphod	4.53666	5.96474	6.83424	10.0768	6.46764	7.80356	8.71226	4.40571	7.45066	4.98269	9.36481	7.2213
Zaphod2	3.93767	5.49017	5.15835	6.81088	5.0151	3.78671	5.75548	3.98574	3.91646	5.7293	7.55795	4.51385
Zaphod3	2.90517	3.90249	5.14421	10.0079	4.97159	5.04198	5.25594	3.60467	5.02823	4.21052	7.59833	4.9781
Zaphod4a	0	0.525026	0.632579	1.60195	0.51967	1.15066	1.14165	1.04898	1.41679	0.811517	1.77488	0.979032
Zaphod5a	0	0	0	0	0	0	0	0	0	0	0	0
Zaphod5b	0	0	0	0	0	0	0	0	0	0	0	0
hAT-16_Crp	0	0	0	0	0	0	0	0	0	0	0	0
hAT-1_Mam	3.4264	6.14782	6.15482	13.1773	5.20291	11.8622	11.9616	7.49543	7.30621	8.46791	17.4771	9.17669
hAT-4b_Ther	0.581975	0.697401	0.924725	1.60195	0.587938	1.31803	1.08635	0.629387	0.916748	0.732937	1.87039	0.835898
hAT-5_Mam	1.4605	2.77445	2.95657	6.08052	2.66669	6.21356	4.80775	3.29951	4.25038	4.06792	6.77182	3.82159
hAT-N1_Mam	0	0	0	0.706236	0	0.899606	0.940316	0	0	0.489955	1.17061	0.535701
hAT-N1a_Mam	0	0.632743	0.577793	1.73975	0.506343	2.40592	2.45198	0.781966	2.30576	1.13556	2.16436	1.59779

## Sheet: cpm_Hippocampus.xls
TE.subfam	mean.2A	mean.2B	mean.3A	mean.3B	mean.4	mean.5	mean.6	mean.7	mean.8	mean.9	mean.10	mean.11
Alu	5.86929	8.07427	7.71764	7.80806	13.8271	24.1546	19.808	11.7374	21.2953	11.7568	16.4257	14.9738
AluJb	648.896	863.803	816.673	994.961	1250.39	2460.78	1577.13	1016.91	1612.19	1012.86	1275.59	1396.47
AluJo	188.613	296.807	281.868	370.961	473.24	866.312	555.15	374.844	517.756	315.099	470.976	482.805
AluJr	505.974	759.764	737.366	889.674	1239.27	2064.91	1493.24	979.546	1436.95	943.457	1265.55	1270.01
AluJr4	47.1514	74.0514	72.5545	85.3452	118.179	189.981	134.632	84.125	108.962	76.0027	108.318	101.827
AluSc	176.437	282.661	245.278	330.009	347.971	1021.06	501.227	337.91	529.099	266.829	462.623	440.34
AluSc5	16.0611	27.7103	23.3656	36.5381	36.2383	106.86	52.0626	36.032	50.9554	26.1583	46.2555	44.8456
AluSc8	95.7575	163.14	136.767	172.845	187.795	612.135	275.317	171.361	265.852	135.688	237.627	227.202
AluSg	225.178	383.43	324.948	413.925	443.154	1373.54	634.163	443.632	630.766	334.079	560.671	556.276
AluSg4	53.8917	86.8415	75.5736	96.0581	106.432	308.332	154.477	100.64	138.038	81.3815	125.646	121.037
AluSg7	34.2236	50.1512	38.7134	49.8389	57.8603	178.345	88.7442	57.3341	79.2014	46.8438	76.5782	79.0376
AluSp	343.85	568.02	492.009	606.324	676.397	2170.62	981.978	667.193	936.712	504.757	854.57	836.95
AluSq	64.1115	107.309	92.6003	122.597	130.08	380.805	179.769	117.924	184.03	86.7665	153.193	145.107
AluSq10	9.83024	13.8616	11.6417	14.2794	14.5805	41.1878	17.982	11.4773	14.9785	8.57223	15.3701	13.6409
AluSq2	260.03	426.657	357.642	445.395	523.597	1457.23	714.472	496.935	699.05	387.731	604.949	607.196
AluSq4	3.98694	8.4748	7.05929	10.2517	11.6877	44.5834	17.7735	10.6008	22.6715	7.468	13.7539	15.7611
AluSx	687.219	1052.87	920.025	1149.98	1251.47	3658.52	1850.74	1155.8	1945.11	990.563	1507.51	1517.49
AluSx1	535.051	950.308	795.364	1055.97	1117.14	3222.46	1501.35	1007.51	1370.94	779.997	1331.93	1250.44
AluSx3	132.007	234.659	203.46	279.942	305.237	894.687	436.289	290.823	440.492	219.217	362.789	367.902
AluSx4	58.9523	91.4793	77.0762	100.446	106.424	341.759	156.66	112.728	151.015	89.4385	141.107	138.158
AluSz	518.402	876.325	767.282	1001.38	1170.18	3234.44	1632.57	1138.42	1563.16	852.731	1395.24	1444.21
AluSz6	194.423	310.683	274.923	353.396	433.981	1036.43	553.827	387.317	551.935	293.388	497.749	477.031
AluY	378.302	627.707	518.507	765.111	727.696	2542.92	1131.32	742.216	1534.61	597.764	1033.92	963.547
AluYa5	7.66777	14.8049	10.4704	19.8882	15.2071	50.6697	27.0977	15.1464	56.1118	18.9536	31.3968	20.5571
AluYa8	0	0.574694	0.667054	0.875035	1.32594	2.71477	1.73592	0.808089	1.76162	0.624258	1.41745	1.2532
AluYb8	5.74338	8.43211	7.36431	15.1879	11.3563	32.5684	16.6519	11.5274	29.7317	13.6596	24.2614	13.9454
AluYb9	0.641141	1.1377	0.819085	1.64808	1.33477	4.67498	1.8246	1.03449	2.09436	1.09928	2.26822	1.47905
AluYc	14.9639	26.3056	21.1483	32.7194	33.1443	106.554	52.6635	35.562	83.5291	29.2656	62.4631	59.7886
AluYc3	3.31139	3.781	3.01601	4.80386	4.19816	17.1573	6.6985	5.1105	10.0138	4.69747	6.95096	6.15203
AluYd8	0	0.718377	0.428553	2.09535	1.24823	2.29458	2.4115	2.75393	11.3837	3.52424	4.6268	2.47204
AluYe5	2.731	5.29323	3.96593	7.14597	5.56931	22.7804	10.3225	6.68308	17.7573	4.63638	10.9382	8.25754
AluYe6	0.503661	0.869084	0.785692	1.38628	1.18808	4.31287	2.16157	1.80778	5.47861	1.03135	2.17291	1.70411
AluYf1	8.01877	14.2079	11.4201	14.4811	15.1416	45.6917	22.5897	13.5115	29.4937	10.7836	19.6122	17.4965
AluYg6	4.39236	4.81852	5.54029	4.36036	6.2458	8.26363	5.61548	3.10347	8.50591	3.87336	4.14733	4.66668
AluYh3	1.57209	2.38123	1.96944	4.08622	3.16962	12.1066	5.1805	2.82085	8.06366	1.96504	5.08086	3.68065
AluYh3a3	0	0.522138	0.626339	1.25638	1.6301	2.66768	1.80425	1.27466	2.85671	1.72255	1.63981	1.53892
AluYh7	0.820278	1.49684	1.24132	1.84378	1.88731	6.67914	2.91933	1.62077	5.02057	1.14221	2.13432	2.16787
AluYh9	0	0	0	0	0	0.643634	0.420987	0.439802	0	0	0	0
AluYi6	1.42532	2.25751	2.27991	4.77524	2.53251	4.64829	3.43938	2.17492	7.88886	2.69471	3.73803	2.82166
AluYi6_4d	0	0	0	0	0	0.87126	0	0	0.642313	0	0	0
AluYj4	9.16863	15.7157	14.0824	22.0966	20.5135	61.1196	30.2678	20.1624	41.0838	14.1546	21.5228	23.7291
AluYk11	0.675354	0.583028	0.724696	0	0.750654	1.63263	1.24748	1.03755	1.53207	0.577471	0.989889	0.911336
AluYk12	0	0	0	0	0	0.58084	0.468776	0	1.38466	0	0.569168	0
AluYk2	29.7951	45.3336	38.7888	55.39	52.8055	175.984	82.8485	61.739	108.04	47.4641	81.9785	79.3384
AluYk3	22.8508	41.714	34.9479	52.6894	50.3768	150.409	68.5051	40.588	75.6687	31.1676	61.8559	51.698
AluYk4	4.75102	7.14023	6.28202	8.53773	7.75636	24.1478	12.1144	8.17611	16.0705	6.86116	10.2965	9.90329
AluYm1	20.1354	30.201	25.5866	37.5723	35.6709	120.459	53.2497	36.0401	68.718	29.0286	51.14	42.8698
AmnSINE1	5.01776	8.15362	5.95149	7.99429	11.3059	14.385	12.6551	12.973	11.2141	9.71496	15.0577	13.0242
AmnSINE2	1.74777	2.79201	2.41372	2.04415	4.33034	4.2124	4.42082	2.77267	3.84335	3.30757	3.83008	3.55986
Arthur1	2.21934	5.08984	4.04354	4.93764	10.0492	7.4044	12.6252	9.69477	6.26518	9.95973	12.0255	12.4291
Arthur1A	1.33131	2.36687	2.08909	2.13183	3.88053	6.04388	5.72782	3.4993	3.31686	3.96173	5.718	3.70747
Arthur1B	3.72289	6.17051	5.61455	6.31185	12.7168	12.0511	15.0475	10.7641	10.5613	10.3388	14.0787	12.5821
Arthur1C	1.05497	2.05126	2.08275	2.72372	3.92653	4.31706	2.96689	1.74009	2.05329	1.60036	2.96763	2.45604
Arthur2	1.95509	3.33908	2.46422	2.30614	5.12666	4.49026	5.34477	3.70619	3.22841	3.37666	6.09361	4.17253
BLACKJACK	2.44259	3.17152	3.0077	2.82621	6.24675	6.4625	7.71688	5.52621	5.7387	6.30071	10.7188	7.82131
CR1-11_Crp	0	0	0	0	0	0	0	0	0	0	0	0
CR1-12_AMi	0.817788	1.37664	1.39093	1.02076	2.51626	1.17738	2.60512	1.16643	2.36919	1.7187	2.40204	1.78311
CR1-13_AMi	0	0	0	0	0	0.444788	0.511421	0	0	0	0.438286	0
CR1-16_AMi	0	0.48998	0	0.507351	0.927083	1.02039	1.55974	0.898726	1.948	0.614685	1.36697	1.30522
CR1-1_Amn	0	0	0	0	0	0	0	0	0	0	0	0
CR1-3_Croc	1.16978	2.43684	2.12566	2.36537	4.32687	7.06427	6.17218	4.16856	7.73934	4.31422	6.81813	5.84247
CR1-8_Crp	0	0	0	0	0	0	0	0	0	0	0	0
CR1-L3A_Croc	0.858994	1.40435	1.21297	2.11952	3.02371	2.53791	3.59544	1.47238	1.8427	1.5179	2.40638	2.46635
CR1-L3B_Croc	0	0	0	0	0	0	0	0	0	0	0	0
CR1_Mam	6.9119	6.76755	5.03681	4.61221	11.0537	17.1903	16.4219	9.96209	12.1618	8.57753	14.0574	11.0077
CRP1	0	0	0	0	0	0	0	0	0	0	0	0
Chap1_Mam	0.679338	1.45635	1.0656	1.22945	3.05767	2.85187	3.24667	2.2755	2.47448	2.68864	3.96329	3.0479
Chap1a_Mam	3.75131	5.30331	4.21471	4.78888	9.43936	9.90882	10.4413	6.16488	10.3718	8.12154	14.1892	8.86359
Charlie1	18.5724	24.3256	20.9224	15.0382	30.669	23.2425	31.8362	22.8567	17.374	27.6933	37.1895	28.106
Charlie10	5.37975	9.07606	8.43855	6.6107	15.1133	7.87536	15.8144	9.58004	9.73999	11.9168	17.6361	11.8848
Charlie10a	0.481623	1.02197	0.750587	1.91432	1.89449	2.53791	1.35484	1.43414	2.63243	1.05926	2.22032	1.82508
Charlie10b	0.573878	0.918774	0.663669	0.841204	1.52202	3.00886	1.42223	0.898726	1.63211	1.15555	1.74977	1.70767
Charlie11	0	0	0	0	0.512014	0.863411	0.934863	0	0	0	0.789086	0.402672
Charlie12	2.55616	4.48463	3.42239	2.52316	4.28747	1.49135	3.59336	4.14944	0.895026	3.85272	3.05872	2.74563
Charlie13a	1.59239	3.12543	3.17986	2.91199	5.84953	5.75607	6.07036	4.45539	4.05394	4.29493	5.7695	4.88056
Charlie13b	0.452427	0.874234	1.04906	0.933911	2.1546	3.42748	2.48034	2.12252	0.789729	1.17449	1.76925	1.96964
Charlie14a	0.625651	0.53766	0.605616	0	1.2832	1.54367	2.30865	0.975213	1.52681	0.89446	1.11897	1.55682
Charlie15a	9.89337	18.59	15.3411	20.2947	28.8945	22.5528	31.1078	27.4337	25.4714	31.9688	39.215	33.4319
Charlie15b	9.16784	10.0752	8.57198	14.1549	23.6654	23.8354	26.5839	21.5121	22.4809	25.6063	40.0924	33.4935
Charlie16	4.25495	5.10478	4.89919	4.00379	7.56512	8.55562	9.47798	6.46318	6.15988	8.37135	11.3727	7.77877
Charlie16a	3.15343	4.68975	4.64193	4.69419	9.59026	14.6707	12.5596	10.7973	5.73238	10.9935	15.8403	12.1842
Charlie17	6.88886	7.47	8.00201	4.59041	8.88674	5.88689	6.8874	4.11119	3.00097	4.04975	5.44168	5.2588
Charlie17a	2.27851	3.37534	3.24416	4.45048	7.92226	9.23588	8.63682	9.77126	10.3718	9.30014	11.3439	11.1181
Charlie17b	3.46388	3.8345	3.18505	2.6391	5.2791	4.31706	3.88229	4.83782	3.21156	4.75114	5.36213	5.61663
Charlie18a	8.34349	12.6876	11.2855	9.78374	21.965	17.0327	25.2743	21.5082	15.3629	17.4488	23.6352	18.3313
Charlie19a	4.27394	6.35415	6.32404	6.81433	10.9411	21.1818	15.0568	12.0219	10.1822	9.29252	12.5632	11.5014
Charlie1a	24.3897	34.205	31.0336	25.7858	57.889	61.1531	71.0995	46.294	35.4946	48.768	66.3085	56.5315
Charlie1b	7.19482	9.97836	9.41678	8.59591	15.8436	20.6674	20.6832	13.2767	11.4648	11.2441	17.4836	13.9707
Charlie20a	4.44629	5.13707	4.52243	3.24358	6.89409	6.38401	7.7627	6.13811	7.00226	6.55732	7.31677	6.85863
Charlie21a	1.30028	2.22986	1.76245	2.56786	3.8636	4.73568	6.27988	4.45539	1.52681	3.38704	4.78052	4.24237
Charlie22a	1.21361	2.84713	2.13098	3.69634	4.98498	6.73722	6.17043	4.11731	4.73837	3.98227	6.22496	5.44692
Charlie23a	1.8634	2.85657	2.787	3.17158	5.47681	6.11347	8.65272	4.92693	6.52842	5.52402	8.35864	6.90629
Charlie24	3.52863	5.47602	4.32539	5.8425	8.01039	8.51742	10.5164	6.86474	5.00162	7.40051	7.31775	7.3473
Charlie25	2.73147	3.23636	2.57865	2.07592	4.90759	4.31706	5.10553	4.3789	3.21156	3.29478	6.46776	3.67747
Charlie26a	0.722917	1.09651	0.812101	0.881284	1.57016	1.38669	2.14181	1.74009	0.789729	1.81339	2.13929	2.04986
Charlie29a	2.11437	3.56922	3.2502	3.38083	7.40819	6.51483	7.6092	5.03516	6.58107	4.51663	7.71919	6.06647
Charlie29b	1.93801	2.90415	3.41663	2.54287	6.04022	6.67705	6.28094	4.21024	3.21156	3.88336	5.4001	5.46069
Charlie2a	21.6107	27.059	17.9119	12.9526	24.058	14.207	21.2657	13.5402	9.73999	12.7961	16.5399	13.3718
Charlie2b	10.9974	15.5205	12.5094	11.1145	20.5404	14.4163	20.5794	14.2787	11.53	13.9838	18.1841	15.8415
Charlie3	1.68184	2.17749	2.1035	2.30042	3.85722	5.57293	5.52479	3.23159	4.36983	3.79837	5.67187	4.94426
Charlie30a	0.701719	1.59706	1.12702	1.73464	3.7325	6.72414	8.94524	5.44972	15.426	6.02379	10.6942	7.47779
Charlie30b	2.10189	2.80467	2.3254	1.46189	4.38231	5.57293	4.12298	3.10424	3.87704	4.00587	5.49291	3.68087
Charlie31a	1.37879	2.11512	1.92671	2.38661	3.68265	3.74145	4.44957	3.4993	5.5281	3.63457	4.84563	4.37872
Charlie32a	0.688019	0.924534	0.837633	0.591724	1.20213	1.22971	1.274	1.01346	0.895026	0.666026	1.39571	1.20786
Charlie4	1.62053	2.50071	2.62503	3.32431	5.12184	5.49391	6.21748	3.69701	3.26421	2.73726	3.23811	4.42151
Charlie4a	7.70591	10.9515	9.32482	9.06341	20.005	19.152	23.1966	15.0554	13.1621	17.7717	21.3408	22.453
Charlie4z	26.0323	35.2429	32.6812	21.0155	48.7598	54.1804	49.8528	39.8308	29.957	38.9299	43.5618	42.9603
Charlie5	19.5721	30.3644	24.4371	17.797	37.5382	21.7946	62.0601	56.0713	56.5972	101.04	154.318	103.298
Charlie6	0	1.04784	0.743239	2.34512	1.42539	1.85764	1.40906	0.898726	1.10562	0.720024	1.73322	1.14684
Charlie7	6.68213	10.6612	9.34527	11.637	20.4484	16.7449	22.7261	13.1749	11.2668	14.0093	22.3762	17.2612
Charlie7a	0.922468	2.14865	1.50926	1.46347	3.85597	3.4976	5.67314	3.61403	3.42216	3.81688	4.63455	4.14366
Charlie7b_Mars	0	0	0	0	0	0	0	0	0	0	0	0
Charlie8	15.6934	22.7206	22.6608	25.7766	41.814	49.7121	40.2513	31.8742	33.2908	30.1073	41.39	36.7581
Charlie9	3.90455	4.33065	4.33234	3.94704	8.98125	10.3871	14.7245	6.84562	5.00162	6.13844	9.99145	8.62512
Cheshire	13.8927	28.7581	19.3452	13.6038	35.8737	17.2944	34.5524	29.3512	15.6366	40.5784	51.1925	29.1604
Chompy-6_Croc	0	0	0	0	0	0	0	0	0	0	0	0
Chompy-7_Croc	0	0	0	0	0	0	0	0	0	0	0	0
DNA1_Mam	0	0	0	0	0.53689	0.497115	0.476003	0.516289	0.473837	0.580216	0.493246	0.523534
ERV24B_Prim-int	1.00848	1.74607	1.3357	2.16074	2.89754	3.32282	3.46164	2.16038	2.26389	3.55814	4.65565	3.62663
ERV24_Prim-int	0.830642	1.31116	1.04236	1.00849	2.52594	3.00886	2.29454	1.54887	2.79038	1.67911	3.15979	3.10109
ERV3-16A3_I-int	13.076	22.6258	22.4891	21.0855	41.1384	57.5477	45.597	38.2238	35.9758	35.7139	43.2046	50.5518
ERV3-16A3_LTR	0.970328	1.68326	1.68664	2.30035	3.30202	6.80263	5.97094	2.84915	4.89632	3.08437	6.62502	4.22395
ERVL-B4-int	38.1127	45.3889	41.0403	31.9362	60.1392	44.372	59.2832	48.1671	48.2251	43.5709	47.2962	56.0736
ERVL-E-int	23.6468	39.4535	38.2899	40.7335	68.8715	72.2879	69.2514	51.694	39.6539	46.0676	61.3727	58.6795
ERVL-int	1.75433	3.69563	5.16468	3.43154	8.10389	8.0585	8.35372	6.71176	10.1085	5.30224	7.43864	6.67346
ERVL47-int	0	0.62028	0.614832	0.820604	1.23949	2.2501	1.4617	1.35765	1.7374	0.598145	1.08774	1.66786
EUTREP15	0	0	0	0	0.431288	0.654099	0.739022	0.478046	0.579134	1.00453	1.06267	0.962459
EUTREP16	0.828754	1.05866	1.08435	0.724235	1.51017	2.01463	2.49075	2.19901	1.8427	1.70058	2.90948	2.09859
EUTREP4	0.795389	0.773458	0	0.618434	1.28512	1.28203	2.26767	2.31374	0.789729	1.81649	1.52204	1.77121
EUTREP7	0.464971	0.601422	0.53086	0.929231	0.91628	0.549443	1.19725	0.898726	0.684432	0.53771	1.25657	0.777613
EUTREP8	0.725307	0.68972	0.704552	1.28256	1.5249	1.64833	1.94977	2.00779	1.63211	0.951925	1.99202	1.86573
Eulor1	0	0	0	0	0	0	0	0	0	0	0	0
Eulor10	0	0	0	0	0	0	0	0	0	0	0	0
Eulor11	0	0	0	0	0	0	0	0	0	0	0	0
Eulor12	0	0	0	0	0	0	0	0	0	0	0	0
Eulor2A	0	0	0	0	0	0	0	0	0	0	0	0
Eulor2B	0	0	0	0	0	0.497115	0	0	0	0	0	0
Eulor2C	0	0	0	0	0	0	0	0	0	0.521015	0	0
Eulor3	0	0	0	0	0	0	0	0	0	0	0	0
Eulor5A	0.414846	0	0	0.6474	0.611788	0.601771	0.671201	1.16643	0.579134	0.756036	1.07748	1.00312
Eulor5B	0	0	0	0	0	0	0	0	0	0	0	0
Eulor6A	0	0	0	0	0	0	0	0	0	0	0	0
Eulor6B	0	0	0	0	0	0	0	0	0	0	0	0
Eulor6C	0	0	0	0	0	0	0	0	0	0	0	0
Eulor6D	0	0	0	0	0	0	0	0.401558	0	0	0	0
Eulor6E	0	0	0	0	0	0	0	0	0	0	0	0
Eulor7	0	0	0	0	0	0	0	0	0	0	0	0
Eulor8	0	0	0	0	0	0.549443	0	0	0	0	0.536522	0
Eulor9A	0	0	0	0	0	0.601771	0.475338	0	0	0	0.502131	0
Eulor9B	0	0	0	0	0	0	0	0	0	0	0	0
Eulor9C	0	0	0	0	0	0.915739	0	0	0.473837	0	0	0
EutTc1-N1	0	0	0	0	0	0	0	0	0	0	0	0
EutTc1-N2	0	0	0	0	0.470113	0	0.793881	0.745751	0.895026	0.493258	1.07993	0.604904
EuthAT-2	1.84611	4.30232	3.14578	5.33065	7.66002	6.20034	9.48253	6.52054	6.37048	6.8813	9.49352	9.15322
EuthAT-N1	0	0	0	0	0	0	0	0	0	0	0	0
EuthAT-N1a	0	0	0	0	0.412607	0.497115	0.627474	0.898726	0.789729	0.685246	0.83293	0.479016
Eutr10	1.74222	4.96406	4.36097	4.71629	6.81494	7.98001	5.59153	5.64094	5.5281	3.9872	7.39981	6.00465
Eutr11	1.98925	2.77872	2.85302	2.97633	4.98011	4.2124	6.1743	3.88173	3.10627	3.69728	5.96549	4.41354
Eutr15	0	0.44145	0.441971	0.664473	1.04415	1.07272	1.75546	1.01346	0	0.608179	1.23657	0.962893
Eutr16	0.828856	1.41195	0.992371	1.29246	2.70195	2.95653	2.33591	2.04604	1.42151	1.7863	2.75511	2.53992
Eutr18	0.777247	2.55358	1.9334	2.67981	3.59935	7.82303	5.61165	4.49363	4.05394	3.37355	3.94589	4.85738
Eutr2	0	0	0.508034	0	0.568934	0.566712	1.12337	0.478046	0.789729	0	0.55224	0.449905
Eutr2B	0	0.555959	0.70589	0.678005	1.24471	2.15329	2.39861	1.47238	1.31621	1.54148	1.85072	1.95772
Eutr5	0.467854	0.794138	0.973154	1.17184	1.27664	1.33436	1.64449	1.6636	0.789729	1.3857	1.40805	1.90084
FAM	20.4491	25.6765	25.3672	24.4227	39.4601	51.2552	41.5265	28.9199	41.1291	26.1583	34.0235	34.9065
FLAM_A	40.5228	52.9049	50.9652	56.1145	88.1118	115.967	103.212	67.0037	90.4376	62.0714	86.5363	78.3399
FLAM_C	67.885	103.277	89.0278	105.41	156.996	219.536	177.329	122.53	165.398	110.798	150.198	143.913
FRAM	46.7716	71.2967	74.7634	93.4913	126.217	206.394	161.04	102.871	156.969	91.8516	122.436	132.318
FordPrefect	1.30848	2.59139	2.37746	2.36374	4.63512	4.52637	4.15175	2.67056	3.31686	2.19389	3.53677	3.16655
FordPrefect_a	0.469963	0.759061	0.564085	0.806975	1.15889	4.31706	0.995882	0.770992	0.684432	0.580109	0.859916	1.45144
HAL1	106.467	129.857	124.79	105.914	215.422	292.674	276.868	177.836	219.083	169.193	243.045	203.608
HAL1M8	16.1131	23.903	18.398	12.4311	30.5559	26.3728	34.7313	28.7019	18.8998	30.4043	36.1754	28.2576
HAL1ME	17.3684	23.7403	22.4304	20.1606	43.9646	43.2082	57.268	36.7881	39.4338	41.0255	55.2342	41.2201
HAL1b	7.38984	11.7383	10.2872	11.5505	22.96	24.2378	28.1392	17.6036	18.7955	18.5428	23.5059	21.535
HERV-Fc1-int	4.51439	10.7534	12.991	2.98051	10.1213	8.51166	14.1725	13.653	12.345	6.29379	7.90331	5.84546
HERV-Fc1_LTR1	0	0	0	0	0	0	0	0.554533	0.579134	0	0	0
HERV-Fc1_LTR2	0	0	0	0	0	0	0	0	0	0	0	0
HERV-Fc1_LTR3	0	0	0	0	0	0	0	0	0	0	0	0
HERV-Fc2-int	0	0	0.6237	0	0	0.654099	0.46638	0.535411	0	0	0	0
HERV-Fc2_LTR	0	0	0	0	0	0	0	0	0	0	0	0
HERV15-int	3.20702	2.29023	2.04338	1.19395	2.57748	4.11821	3.32855	1.41616	2.94832	1.24417	1.59494	2.26533
HERV16-int	7.69077	8.86799	9.24901	9.19507	12.5037	14.5733	13.8226	10.4979	8.95026	7.69478	10.2959	12.2556
HERV17-int	7.30574	7.61196	7.28577	7.77339	15.8664	46.1067	23.1969	15.0428	19.0451	11.2072	17.0083	15.7725
HERV1_I-int	0.737557	2.11877	2.03881	2.28868	3.49893	2.48558	2.83789	1.12819	1.948	1.35322	1.30258	2.47501
HERV1_LTRa	0.432883	0.462371	0.546094	0	1.05529	0.863411	0.976328	0	1.00032	0.536324	0.438254	0.424364
HERV1_LTRb	0	0	0	0	0	0	0	0.478046	0	0.400691	0	0
HERV1_LTRc	0	0	0	0.900822	0.539881	0.654099	1.2235	0.554533	1.52681	0.492076	0.50197	0.593353
HERV1_LTRd	0	0	0	0	0.45155	1.28203	0.639391	0	0.473837	0.443903	0	0.49245
HERV1_LTRe	0	0	0	0	0	0.444788	0	0	0	0	0	0
HERV3-int	6.61989	6.75158	7.50614	6.4501	9.45857	18.2101	11.9065	7.99293	8.16053	6.20063	9.66723	9.19861
HERV30-int	0	0.78071	0	0.462919	0.972867	2.59023	1.57874	1.12819	1.63211	0.988697	2.5466	1.19007
HERV35I-int	2.3569	2.26052	2.19581	1.56031	3.18741	5.1543	4.19855	2.39023	3.15892	1.70654	3.7761	2.49258
HERV4_I-int	5.38451	6.86137	7.80839	7.27083	12.6985	20.4278	12.8786	10.9297	16.7212	11.0203	14.5992	14.1653
HERV9-int	2.54087	4.01991	4.25212	3.86205	6.74259	18.3336	12.0338	6.37675	13.8181	6.32662	10.1296	9.19269
HERV9N-int	2.8863	3.78749	3.47142	2.98816	5.85389	13.8502	7.8748	6.38516	8.88287	3.73804	6.9822	5.74476
HERV9NC-int	3.28732	4.44492	3.36004	2.99495	5.61643	19.1614	10.1755	6.82726	10.4507	5.10224	10.3336	9.04946
HERVE-int	12.5119	13.103	14.4922	16.2209	26.5106	38.4736	30.5294	41.5387	17.8394	23.7646	17.4732	30.7769
HERVE_a-int	13.7103	15.5754	14.2282	11.776	15.5346	9.80783	12.1782	9.0844	7.3687	9.63587	10.2742	9.45927
HERVFH19-int	0	0	0	0.670307	0.794406	2.64256	3.05489	2.04604	8.47642	1.04683	1.93672	2.02518
HERVFH21-int	1.89679	3.7761	2.5055	3.7583	6.77406	19.2828	10.3103	4.76134	10.8983	3.6585	4.33895	5.84674
HERVH-int	25.3343	61.8084	66.7766	67.202	198.28	417.296	399.472	232.884	650.152	203.338	259.874	288.852
HERVH48-int	5.06958	7.60787	10.2684	6.49688	13.6296	41.7054	31.9403	15.1506	49.2264	12.0111	19.8813	19.7478
HERVI-int	1.75305	2.60344	2.4196	2.9624	3.82663	6.60483	3.94805	2.28506	4.96792	2.91204	3.03478	3.64635
HERVIP10B3-int	8.277	9.64562	9.82072	6.41509	15.0065	29.7526	16.9238	9.35631	15.6998	8.58349	10.8062	13.2924
HERVIP10F-int	5.07158	9.04639	7.96576	7.24927	13.4895	11.4666	12.3589	9.85539	10.0991	7.84042	7.6539	10.0069
HERVIP10FH-int	2.49579	4.21238	4.47918	5.18412	7.8965	16.1123	13.9584	7.31487	14.4678	6.16406	10.5817	10.0741
HERVK-int	19.7971	28.306	25.0239	59.978	62.4936	90.1799	62.5385	46.3957	40.9301	49.9201	67.4145	63.129
HERVK11-int	4.54005	7.37595	7.57404	8.48631	15.5419	25.367	24.6632	11.0815	16.1368	11.7583	17.8362	16.8635
HERVK11D-int	0	0.561159	0	0.460531	1.76917	2.21347	2.44279	2.06478	2.04171	1.12989	1.68659	1.43233
HERVK13-int	18.78	10.793	12.0331	18.3429	15.4597	38.9487	12.1496	7.47855	14.9311	7.099	11.2035	12.5133
HERVK14-int	7.41019	12.9293	12.3487	13.8984	21.8531	26.67	18.2418	11.3457	11.2131	9.49367	10.6465	14.4463
HERVK14C-int	1.70819	2.73682	2.70741	2.65962	3.67322	3.96907	4.2174	2.42197	1.66685	2.56806	4.57973	3.12119
HERVK22-int	2.38337	4.19299	4.60926	4.22419	6.8791	11.8	10.0504	6.63528	7.84464	4.37909	10.403	8.51382
HERVK3-int	10.4291	16.9319	17.5905	19.3821	27.0522	30.324	27.185	19.8863	13.8992	16.5229	17.3803	24.8139
HERVK9-int	17.0057	22.7238	19.6137	30.1262	41.0305	59.5136	40.8569	36.8799	32.501	32.9637	43.8183	46.7548
HERVKC4-int	0	0	0	0	0.645957	1.43902	0.494343	0.653202	1.34991	0.489385	0.868045	0.836252
HERVL-int	21.4616	26.8293	24.9061	24.0588	38.7007	53.5508	47.1643	37.8245	36.1696	33.6367	46.1316	44.4101
HERVL18-int	1.62913	2.21219	2.56967	2.56484	2.89016	3.82831	5.27092	4.49363	4.89632	3.38688	6.26811	5.17616
HERVL32-int	0	0	0	0	0	1.02039	0.612633	0.554533	1.948	0	0.69703	0.562886
HERVL40-int	11.7019	15.5194	13.9335	9.56403	18.2605	15.0966	16.2764	17.5347	11.9512	13.2919	15.266	14.2087
HERVL66-int	2.48914	2.92426	3.12966	3.127	4.01376	3.32282	3.67462	2.67706	3.05362	3.09025	5.01563	3.25989
HERVL74-int	7.24236	11.5928	8.77119	6.97305	9.61224	5.25896	7.96963	5.02904	7.21286	4.41962	8.73544	5.64431
HERVP71A-int	1.37707	2.59907	1.91472	2.60894	5.80392	8.66027	7.01893	16.789	3.21156	12.5142	6.26194	11.0483
HERVS71-int	5.23568	10.5546	8.01413	10.7126	18.6998	27.3926	28.9568	16.4123	24.3742	17.0545	16.2884	20.6329
HSMAR1	7.57191	10.2462	9.94875	10.6526	13.761	20.7213	16.7454	9.92423	13.8466	11.7452	17.7976	12.9183
HSMAR2	12.3752	17.1061	15.235	12.3988	25.5928	26.6506	25.4329	22.0092	13.8466	19.1679	24.9156	22.6108
HUERS-P1-int	4.70634	6.04413	5.1298	3.17048	8.16085	5.25373	7.69339	5.8509	5.31751	6.03484	5.73428	6.23798
HUERS-P2-int	0.779021	1.14151	1.29663	1.09611	2.50822	4.84033	2.86144	2.35199	1.948	2.17344	1.78128	2.36445
HUERS-P3-int	12.5674	14.1152	12.6262	9.88772	21.4514	23.9662	22.7937	18.7776	19.322	17.0976	14.8102	21.2837
HUERS-P3b-int	5.72157	8.9309	6.37165	6.65827	11.8888	15.96	18.7089	9.82824	14.2678	10.169	15.2472	11.7744
Harlequin-int	17.3523	23.0313	21.0192	30.1518	41.249	63.9081	46.2495	30.8588	41.5176	27.2235	32.9232	35.0271
Kanga1	1.50234	2.0692	1.50794	1.01981	2.58458	4.18571	3.00385	2.42847	2.57978	2.82602	4.74115	2.91336
Kanga11a	2.79178	11.1489	8.65715	7.22695	15.8459	9.10925	16.9102	29.2384	11.5532	20.0205	17.4018	11.4042
Kanga1a	2.22858	2.25819	2.27999	2.38126	4.85573	5.5206	4.99843	2.84915	2.36919	3.53349	4.22379	3.93061
Kanga1b	0	0.553466	0.668861	0.536726	1.38123	1.22971	1.38161	1.0517	1.21092	0.987365	2.15395	1.15541
Kanga1c	1.82872	5.12081	3.74298	3.99763	7.06675	6.01667	5.63653	3.80524	2.15859	3.13022	6.28564	4.46833
Kanga1d	1.07902	1.70786	1.31537	1.52298	2.21935	2.01463	3.33462	1.47238	1.31621	1.46739	3.31604	2.03837
Kanga2_a	2.33774	4.53449	2.95401	3.94634	9.10771	6.90781	13.5866	9.31233	6.84432	9.45838	16.6656	10.5816
L1HS	27.2495	23.9893	22.3591	24.0276	20.6666	86.8283	78.6342	93.3646	198.525	44.2393	63.5135	57.7982
L1M	0.474345	1.14641	0.873718	1.21854	2.12598	1.36576	2.56396	1.73244	1.23198	1.70053	1.43836	2.22098
L1M1	24.1667	37.4457	36.618	31.2005	65.1513	100.328	92.8462	58.0986	71.5178	54.6193	101.653	74.2399
L1M2	59.1481	73.9387	68.4053	33.4861	85.2412	77.3904	91.9344	67.8817	65.0642	47.7636	80.2577	62.2869
L1M2a	0.977501	2.3784	2.56042	2.27262	4.73336	6.20086	5.85196	3.88173	6.05459	2.93583	4.82805	4.39214
L1M2a1	0.508525	0.588031	0.473586	0.409822	0.825522	1.38669	1.29411	1.39589	1.52681	0.778331	1.75284	0.911408
L1M2b	0	0.748435	0.559306	0.618856	1.07772	2.51174	2.11215	1.72096	4.36983	1.13207	3.01431	2.88771
L1M2c	1.17615	1.61669	1.64764	1.70879	3.38681	7.36202	6.28588	3.36315	12.7831	3.36754	5.7141	4.70998
L1M3	18.9269	31.7181	26.785	22.3087	52.2508	49.8575	59.0193	37.8543	31.686	36.199	55.944	43.2345
L1M3a	15.3434	13.1473	14.0115	5.26875	12.0565	13.735	11.6286	11.4349	7.73934	9.71026	13.6045	12.771
L1M3b	4.00989	7.04099	6.06146	5.10813	11.3358	6.2354	7.15811	14.6622	3.42111	14.9844	9.82348	11.6405
L1M3c	1.21647	3.05827	2.48887	2.31894	4.84871	9.11814	6.61763	4.05765	5.5281	3.15492	6.31514	4.51823
L1M3d	1.02954	1.76311	1.08998	0.674978	2.9265	3.00886	3.06038	2.50496	2.79038	2.25114	3.44187	2.70603
L1M3de	2.02728	5.06743	4.45191	4.61733	10.4106	8.00618	8.74119	10.0195	6.47472	6.14196	8.08384	9.20182
L1M3e	0.82257	1.48461	1.4477	2.02182	3.32134	7.92768	5.45492	3.69051	6.79167	1.70926	3.65933	3.6517
L1M3f	1.17888	2.06162	1.81771	1.96075	4.30186	7.35208	6.13666	5.03669	3.93811	3.32156	3.62387	4.25951
L1M4	75.4002	121.514	111.31	81.3684	193.925	183.55	220.632	143.798	112.846	142.868	199.955	156.154
L1M4a1	7.28883	11.9012	9.77659	7.68826	18.7593	17.9302	22.4051	17.1282	14.7374	16.5895	26.3408	18.5353
L1M4a2	4.47226	7.71463	6.93746	7.44421	14.1278	18.2368	17.6668	11.9129	10.3181	10.0265	14.2097	12.0459
L1M4b	12.2243	20.2243	19.3026	16.1715	38.1213	41.8885	51.434	36.0737	34.529	34.9849	47.8121	40.1413
L1M4c	14.4656	23.9398	18.8721	15.2609	34.0729	38.2031	43.4849	25.1379	20.7499	31.7344	58.8136	29.1466
L1M5	122.663	179.632	154.853	120.307	287.767	257.761	335.239	223.455	168.354	234.381	319.519	259.235
L1M6	9.37123	11.1645	9.35724	7.33812	20.559	19.9626	26.859	22.9944	25.8505	23.7874	26.9244	22.2116
L1M6B	29.764	27.5329	34.7805	12.8212	37.0685	10.8057	26.2272	33.272	10.1612	39.0851	19.5812	20.5994
L1M7	5.12201	8.13503	7.15552	6.84598	15.408	18.4953	22.2149	12.8315	19.7422	11.9387	26.6393	16.2679
L1M8	3.23486	5.62293	5.38275	3.38246	8.79112	12.7063	13.5595	9.58998	8.27109	6.58413	11.6208	8.94579
L1MA1	22.8219	35.4086	34.394	27.8844	70.7962	39.5552	67.3545	46.2305	37.1973	38.6794	54.3103	46.364
L1MA10	6.67387	14.8055	11.4668	11.6159	23.1293	17.1112	28.023	14.9338	18.5123	14.9625	25.2815	18.212
L1MA2	16.6199	34.2007	30.2714	29.0694	65.4196	73.942	82.5716	56.993	47.6859	45.972	81.2203	57.3604
L1MA3	26.7262	44.2274	37.8017	41.7935	87.321	128.221	131.239	71.2762	100.46	62.8612	120.875	89.942
L1MA4	25.8799	46.5727	38.9078	39.7277	86.9924	95.8648	114.64	67.8882	79.6815	64.9524	123.05	80.5986
L1MA4A	21.3871	38.7453	34.9189	30.2819	65.2215	91.913	100.138	64.0321	87.5104	49.4687	85.5585	64.6925
L1MA5	25.7732	45.9174	40.8785	27.3759	70.0711	99.9092	87.3684	53.1778	64.7041	42.2111	73.0215	61.0836
L1MA5A	15.4223	21.4661	19.0135	14.8274	33.4991	26.4151	42.564	30.3379	22.1651	24.8744	33.7519	28.3036
L1MA6	12.9856	25.0185	20.3007	18.3888	40.3092	39.673	50.1108	38.1599	31.7903	34.3602	56.962	38.768
L1MA7	21.0771	31.5376	28.7027	25.0888	61.1258	54.3107	71.7099	47.372	48.9453	44.641	65.5042	52.6193
L1MA8	33.6903	55.2309	42.5194	30.0613	78.594	66.8139	96.922	59.4815	54.8019	59.8056	97.3389	67.2285
L1MA9	48.4163	76.9398	66.6291	53.9641	138.647	99.5743	138.749	108.142	93.5871	103.23	134.567	114.472
L1MB1	18.0642	28.729	23.5402	18.354	44.0328	43.7697	55.8995	33.9726	39.9076	34.9053	60.3333	42.1525
L1MB2	40.1401	63.3746	51.8373	45.4193	109.049	105.259	116.461	78.0503	63.3563	72.6137	123.031	81.2964
L1MB3	70.7945	117.498	109.275	108.726	208.927	247.67	259.866	160.722	192.401	163.484	223.135	206.298
L1MB4	55.5919	75.4037	65.9321	50.136	121.989	150.074	153.488	138.436	87.8789	118.218	163.978	132.465
L1MB5	62.1333	110.039	93.9464	89.1273	173.836	162.112	186.186	129.207	108.958	124.023	157.653	143.229
L1MB7	107.661	168.042	148.249	132.515	293.407	332.821	356.22	236.51	236.507	237.962	346.453	288.288
L1MB8	81.1022	122.356	114.883	104.828	225.726	215.14	265.86	174.481	145.212	168.524	227.205	198.263
L1MC	16.9421	29.6457	24.5189	21.5838	51.3275	44.3793	57.9325	38.8242	28.9178	41.6618	62.5203	46.6073
L1MC1	60.2661	102.425	91.0962	93.0137	191.022	170.965	205.04	150.775	151.681	156.203	202.288	180.821
L1MC2	30.93	43.0707	37.0813	34.696	68.2916	66.9102	72.1876	51.1723	44.9724	47.5157	67.7972	54.8564
L1MC3	43.5535	73.6922	65.4778	57.3424	119.221	118.315	142.226	91.2601	101.981	96.9383	141.519	111.593
L1MC4	102.716	152.851	140.066	126.181	259.504	274.679	303.487	204.819	192.097	199.881	294.927	242.339
L1MC4a	50.2337	75.4352	70.0998	54.4076	130.696	145.009	159.273	117.512	118.653	122.922	165.613	139.042
L1MC5	53.7543	81.5719	72.7679	56.976	133.092	136.829	159.123	95.9078	87.9979	104.891	137.053	114.057
L1MC5a	99.153	121.508	111.035	80.7671	181.824	185.9	213.462	133.186	109.737	140.256	185.418	154.415
L1MCa	21.8284	43.0085	36.0263	30.0272	73.4625	71.918	87.1442	65.716	47.3406	56.2621	97.3956	64.5058
L1MCb	2.88446	5.33685	4.10523	3.82067	9.32964	10.0731	12.7682	6.42302	12.0565	6.5922	11.2047	9.21544
L1MCc	6.42032	12.063	10.2496	9.04681	20.3869	23.2122	23.5805	14.1895	15.6261	12.6515	23.8068	17.1131
L1MD	84.7517	76.8469	92.3691	69.8534	98.5647	66.5423	89.9669	56.4767	66.8005	67.2245	106.619	64.654
L1MD1	23.777	42.7408	40.2089	45.3837	91.8846	107.811	120.884	76.5068	84.6726	67.3418	101.374	94.7309
L1MD2	52.7355	84.0248	71.8151	73.9927	162.486	134.517	167.866	103.963	126.717	114.445	174.897	137.719
L1MD3	24.6031	29.8326	27.6978	28.1019	53.9077	53.138	53.8505	37.0394	33.3529	37.5877	58.197	42.6242
L1MDa	46.0181	61.1498	52.9994	30.4365	85.9067	80.573	89.1398	54.9493	58.7548	49.9305	76.8489	59.2256
L1MDb	2.3326	2.93768	2.70851	2.24212	4.31428	4.98005	6.03129	3.57081	3.15892	3.18225	3.99817	4.1308
L1ME1	137.851	227.45	192.292	187.19	386.414	346.412	459.085	282.293	299.027	305.633	478.728	356.748
L1ME2	55.5253	92.5935	80.1425	64.1455	155.678	123.789	165.023	106.161	99.8817	118.016	165.491	126.067
L1ME2z	23.3624	30.9262	29.0672	23.6547	58.1183	67.8589	69.8171	49.9183	42.1905	51.5615	80.1936	57.5095
L1ME3	25.1043	41.1958	37.4429	36.1826	78.8496	84.54	94.1684	56.1566	52.597	62.077	84.3528	73.6601
L1ME3A	53.4473	85.1789	78.6353	69.6325	140.483	161.126	169.248	111.909	105.531	111.948	175.596	134.983
L1ME3B	41.7849	64.3539	58.8525	45.3697	106.509	91.9794	119.396	85.9404	74.2829	87.4767	118.319	93.1326
L1ME3C	5.80965	8.58214	7.55785	8.58014	18.5315	20.747	24.9374	13.0793	13.3717	13.6048	17.7105	17.1348
L1ME3Cz	27.4883	46.7154	38.409	31.119	83.6626	88.5546	105.955	64.0199	60.2037	73.9992	120.867	84.2352
L1ME3D	20.9339	28.2453	25.0824	24.0309	42.8371	31.2131	44.4422	26.6463	29.3253	26.6605	42.9347	29.9052
L1ME3E	34.9894	47.4489	36.4367	40.6741	59.8261	47.5138	61.8305	37.7962	37.51	44.1812	71.9872	46.9544
L1ME3F	12.323	22.77	19.6526	18.7632	46.7865	47.2856	61.4539	53.7128	45.7685	54.7521	61.836	70.0483
L1ME3G	52.9182	81.2474	69.9013	63.8449	139.209	128.253	166.037	105.428	94.4579	116.193	164.153	133.686
L1ME4a	62.3217	91.6835	77.8507	64.735	163.151	129.076	216.405	155.072	104.611	191.44	222.448	180.835
L1ME4b	83.3365	131.503	113.417	100.729	221.952	201.797	256.558	169.562	143.141	190.085	251.727	199.819
L1ME4c	27.635	38.7833	32.0169	30.6018	67.529	62.6318	78.2762	50.6296	44.6986	56.5256	74.4341	65.2916
L1ME5	7.12318	10.8922	11.513	9.44095	20.1503	26.2168	27.501	18.599	20.0949	17.9307	22.5589	20.2106
L1MEa	0.629943	0.899841	1.10593	1.14123	2.40291	4.00309	5.29299	4.45539	5.5281	3.5786	3.05264	3.80665
L1MEb	4.15833	5.25391	4.98672	4.20095	9.59416	14.8873	12.9176	8.16502	8.73967	7.78002	12.1839	8.73845
L1MEc	46.5941	82.3747	71.5918	66.97	147.234	171.935	183.785	120.587	100.487	108.709	160.886	133.553
L1MEd	41.4881	65.3026	61.6279	50.2275	128.704	127.559	163.293	131.29	134.928	133.162	166.744	152.497
L1MEf	37.3566	57.9768	47.528	38.0861	89.6672	89.1014	111.135	87.3325	64.1302	74.7904	104.664	83.4542
L1MEg	32.0256	57.182	50.2606	39.2732	96.6964	112.362	125.651	87.1894	67.4292	75.9916	121.875	95.6435
L1MEg1	0.834077	2.0394	1.55761	1.97867	3.69417	9.23588	5.91395	3.53754	3.73805	2.5743	4.49297	3.64762
L1MEg2	4.82985	8.00258	5.54614	4.84453	10.0259	7.35208	11.0492	7.93556	9.00291	7.75882	8.76284	8.80343
L1MEh	4.11506	6.73	6.56265	5.99537	11.135	15.8878	16.224	11.2287	15.2007	11.0836	16.3412	12.3108
L1MEi	7.34416	12.7834	12.0877	10.6726	26.2967	29.5035	35.3327	22.4869	24.6922	20.4032	30.5424	26.1845
L1MEj	7.95761	11.7466	10.2785	6.92988	17.7194	16.3002	21.6002	11.7469	17.2793	13.7311	20.1423	15.1217
L1P	0	0	0	0	0	0	0	0	0	0	0	0
L1P1	9.09131	13.7919	12.9505	9.6247	22.4855	30.3926	27.9835	23.0177	19.7601	17.486	27.8837	23.2213
L1P2	13.7817	19.1367	18.612	18.0052	29.1844	45.3845	37.9061	29.8056	26.5233	19.5024	28.4857	30.2429
L1P3	14.498	18.5313	17.1031	12.3615	26.6754	34.7301	34.2481	28.8147	20.2444	22.1774	31.7786	25.7822
L1P3b	0	0.412061	0	0	0	0	0.486945	0.860482	1.42151	0.958976	1.21456	0.940678
L1P4	6.35345	11.3788	9.11354	6.88276	18.6264	17.2871	20.3791	13.71	13.0031	12.4428	18.6474	15.7862
L1P4a	2.6358	2.3294	2.0979	2.23874	3.51566	4.19199	5.916	4.75636	3.90653	3.49587	6.50912	5.00874
L1P4b	0.446544	1.48609	1.54804	1.866	1.81118	3.13915	2.29074	2.10952	0.895026	1.84967	1.02433	2.0941
L1P4c	0	0	0	0	0	0	0	0	0	0	0	0
L1P4d	0	0	0.413925	0	0.640557	1.22971	1.62631	0.822239	1.52681	0.443447	2.18116	0.795392
L1P4e	1.85257	2.88998	2.93293	1.53757	2.575	4.66922	2.96188	3.15893	2.84302	2.24513	3.02676	2.28788
L1P5	0	0.645686	0.401351	0.572276	1.10473	1.70066	1.31722	0.688386	0.789729	0.821526	0.855642	0.886766
L1PA10	210.057	108.272	157.597	161.242	207.25	176.22	448.655	170.08	342.343	303.047	208.292	282.689
L1PA11	25.3005	34.4535	38.3297	26.6251	59.948	64.4654	69.9461	50.1914	43.6204	37.9209	54.0001	47.0508
L1PA12	5.09785	13.7856	14.0903	16.0066	26.4225	43.9916	31.7211	25.8412	14.7585	20.8152	23.2836	25.1248
L1PA13	37.5577	56.0636	49.5289	35.8338	87.8881	108.984	112.701	79.3567	83.7565	62.573	101.78	81.3393
L1PA14	15.1573	22.9544	19.4443	14.5517	36.2003	45.4259	42.9865	29.3417	26.3043	28.2575	45.5742	33.9127
L1PA15	21.9238	37.0767	32.7834	29.9239	67.1859	92.7099	91.375	57.7889	76.6679	48.0051	87.7728	67.8975
L1PA15-16	2.20041	3.59038	2.92363	3.85408	7.4149	10.8272	9.06265	6.6674	7.52875	5.24161	10.7887	7.56742
L1PA16	50.6965	72.4867	63.5275	63.1137	134.717	134.861	147.256	108.346	100.623	102.398	149.524	112.178
L1PA17	15.5963	27.9202	21.5227	23.2636	50.245	67.5146	60.0645	38.3006	32.3441	32.2715	54.9297	39.5843
L1PA2	16.4976	31.5507	29.1859	28.3847	60.2184	69.4031	68.2178	53.1048	52.3843	42.3651	57.4064	57.7135
L1PA3	60.8925	109.808	100.691	93.6318	199.574	183.822	200.961	162.933	122.312	128.823	181.667	168.335
L1PA4	63.9217	111.483	99.7582	102.633	210.063	213.603	231.821	193.057	149.284	152.817	197.918	204.336
L1PA5	56.4881	101.795	98.2027	91.7633	192.432	253.509	226.146	188.938	132.899	137.687	182.106	192.943
L1PA6	48.1437	86.8898	82.5935	83.6283	152.375	196.746	208.842	148.591	256.148	114.233	158.025	151.034
L1PA7	143.412	209.072	199.447	123.251	303.574	341.688	359.31	267.802	245.281	245.405	316.613	282.387
L1PA8	26.6611	47.1505	38.0735	39.3345	80.2914	99.0646	97.8525	64.5565	81.7611	63.3112	98.375	79.6899
L1PA8A	10.2142	17.3186	15.9607	14.8964	32.0297	35.0351	40.4238	31.4363	32.8875	28.0364	38.9763	32.597
L1PB	4.41843	5.40142	5.68779	4.06766	11.1278	12.7131	13.9336	8.91957	5.7387	8.05955	10.6845	8.80269
L1PB1	34.383	64.0223	59.1001	63.0478	138.151	197.289	206.141	141.882	136.981	114.484	166.957	143.377
L1PB2	5.306	9.66595	8.1129	8.94912	19.8069	33.4056	28.2826	16.1006	18.9882	11.9888	28.7822	18.4321
L1PB3	7.44362	12.8633	11.0439	12.5122	24.3262	27.3811	33.386	20.3231	21.5859	21.147	37.7156	25.4137
L1PB4	17.0509	26.9308	24.62	20.5598	52.2798	58.9302	73.2382	40.2897	41.506	46.1766	65.4177	51.1809
L1PBa	5.79851	12.7153	10.662	10.1356	22.2619	30.0221	29.7363	18.4166	17.4309	13.1042	27.4406	21.9745
L1PBa1	1.53727	2.97151	2.98973	2.05567	4.55661	8.52945	6.76539	5.49179	5.15956	2.97263	6.21254	4.17042
L1PBb	1.0208	1.714	1.3326	1.40154	2.24817	5.46827	4.11458	2.63881	4.26454	1.95112	3.93965	3.73113
L1PREC2	17.8367	32.0852	28.8347	27.6071	68.7514	77.4752	89.4965	61.2568	85.9657	62.4126	90.4527	71.6972
L2	168.248	267.556	279.214	260.238	541.343	895.619	981.863	503.417	1355.14	446.265	644.826	598.413
L2-1_AMi	1.34251	2.59134	3.22484	2.63318	6.32613	12.0878	14.1201	6.9221	21.8492	6.06978	8.92	7.92772
L2-1_Crp	0	0	0	0	0	0	0	0	0	0	0	0
L2-2_Mam	0.510346	0.755232	0.582504	0.497586	0.953231	1.54367	1.40767	1.43414	0.684432	1.16206	1.68108	1.35817
L2-3_AMi	0	0	0	0	0	0	0	0	0	0	0	0
L2-3_Crp	3.79917	6.46615	6.25865	7.18875	14.5082	29.1074	30.758	14.8198	54.7893	13.8462	21.7377	20.3765
L2a	481.112	765.609	760.807	847.147	1545.55	2311.69	2374.38	1293.75	3336.65	1278.05	1849.95	1714.64
L2b	236.864	371.083	366.096	424.411	720.673	1232.92	1147.7	642.05	1508.43	602.574	888.246	872.582
L2c	318.816	503.206	497.602	521.478	1009.12	1516.52	1556.54	929.235	2041.08	919.906	1285.72	1181.77
L2d	76.7573	93.3423	88.6924	87.0085	165.955	240.163	247.11	138.111	316.701	133.475	213.503	178.766
L2d2	120.366	169.688	167.228	153.413	321.693	500.837	472.79	267.865	601.86	270.765	403.377	341.471
L3	160.487	210.394	198.986	164.814	348.221	397.172	409.728	299.267	380.639	299.673	367.547	360.743
L3b	25.2168	28.0307	29.301	21.7848	49.0539	65.2137	63.8597	43.8139	48.9095	45.3455	57.6175	52.3573
L4_A_Mam	19.9742	34.0357	32.0242	25.1251	57.318	57.286	72.9625	49.5095	40.9259	45.5689	62.6062	54.7074
L4_B_Mam	9.02311	11.6465	10.981	8.98456	20.4648	28.9881	27.0114	17.2349	18.7429	18.2393	26.1482	22.1923
L4_C_Mam	12.6742	17.5758	16.142	14.6801	30.5936	29.8008	35.7481	28.0322	28.0617	28.2241	40.3708	32.7878
L5	0.68526	1.44762	1.8779	1.43787	3.00771	3.63679	4.30812	3.07861	3.21156	2.9997	3.80169	3.79337
LFSINE_Vert	5.09708	7.2904	7.59747	7.40573	12.6461	32.3387	54.3501	18.2422	303.888	38.965	79.7376	39.0879
LOR1-int	35.8815	34.8914	32.0158	14.9566	33.9867	24.5941	33.5033	37.2111	16.5317	29.8628	23.7384	31.1084
LOR1a	1.97869	3.71744	3.75882	4.5692	6.73068	8.64719	8.03326	5.02866	12.3377	5.44065	10.4962	7.47884
LOR1b	3.79714	4.16881	4.35868	3.74792	6.91959	8.06635	8.38971	5.78665	6.30098	3.90561	5.1046	6.35589
LTR06	0	0	0	0	0.473117	0.915739	0.445826	0	0.473837	0.427341	0.54296	0.515472
LTR1	0	0	0	0.521664	0.734902	2.01463	1.35501	0.93697	1.63211	0.881401	1.96064	1.15886
LTR101_Mam	1.24655	2.92276	3.06871	2.49197	5.27302	6.88112	7.40376	5.14339	8.47642	4.60758	8.80711	7.13605
LTR102_Mam	0.466762	0.91977	0.766185	1.8679	2.16005	2.01463	3.27035	2.2755	2.68508	2.78038	4.60894	3.11507
LTR103_Mam	1.67804	2.718	3.09079	1.98721	4.93061	4.82987	5.23972	4.83515	6.09671	4.28752	4.38639	5.2823
LTR103b_Mam	0	0.760008	0.693148	1.22553	2.04058	1.90997	2.27238	1.6636	2.05329	1.18484	2.17894	1.96499
LTR104_Mam	2.82319	4.00369	3.73056	3.47966	7.0744	9.10506	8.06128	6.46318	7.79199	6.76991	9.22021	7.63638
LTR105_Mam	1.1269	1.69714	1.57556	1.73958	2.53648	3.21817	3.06722	1.98867	3.31686	2.29261	3.05787	3.20914
LTR106_Mam	0.849211	2.0838	1.54185	1.46763	3.7247	2.27627	3.56305	4.26417	1.7374	3.19791	2.82808	3.03352
LTR107_Mam	0.427921	0.732477	0.61964	0.967329	1.32914	2.53791	1.62054	0.822239	1.8427	0.876692	1.68501	1.39968
LTR108a_Mam	1.40146	2.24344	1.88384	2.41533	3.60736	1.85764	2.57386	1.20468	1.42151	1.25609	1.08208	2.01427
LTR108b_Mam	0	0	0	0	0	0	0	0	0	0	0	0
LTR108c_Mam	0	0	0	0	0	0	0	0	0	0	0	0
LTR108d_Mam	0	0	0	0	0	0	0	0	0	0	0	0
LTR108e_Mam	0	0	0	0	0	0.654099	0	0	0	0	0	0
LTR109A2	0	0	0	0	0	0	0	0	0	0	0	0
LTR10A	1.72287	2.00188	1.77125	1.61993	2.63111	5.46827	5.30012	2.65793	7.3708	1.88047	3.54751	3.69382
LTR10B	1.72482	0	0.570095	0	0.798154	1.07272	0.785761	0	0.473837	0	0.571525	0.43274
LTR10B1	0	0	0	0.401927	0.653403	0.863411	0.98396	0.592777	1.63211	0	0.694045	0.799768
LTR10B2	0	0	0.426494	0	0	0.654099	0	0.516289	0.684432	0.594647	0	0
LTR10C	2.15071	3.01272	3.36997	3.63707	5.68482	10.4562	6.84904	3.79607	4.21083	3.93913	7.23665	5.64972
LTR10D	0.709459	1.19305	0.88056	1.186	1.58736	3.42748	2.23116	1.31941	3.00097	1.47123	2.61437	1.50027
LTR10E	0.908548	1.60597	1.63486	1.51033	3.71838	4.36938	4.60489	2.42847	2.57978	2.38521	3.96575	3.36133
LTR10F	0.652331	0.849238	0.752246	1.42059	1.74739	7.22126	5.6834	2.21048	7.57087	2.56532	4.42303	3.32084
LTR10G	0.627302	1.04874	0.929149	1.55866	2.52918	3.17421	2.69815	1.11213	2.87777	1.565	1.35175	1.79763
LTR12	2.82943	4.58707	4.00006	5.16276	9.47648	21.8689	10.917	8.06941	8.40377	6.78429	10.2709	10.5512
LTR12B	0	0.46397	0.538792	1.11705	1.66584	2.61378	1.90477	0.93697	3.00097	1.83984	3.29722	2.87293
LTR12C	31.4626	41.5617	42.4297	52.7667	61.9734	140.868	75.3949	63.6707	83.8429	49.2956	75.1841	78.0193
LTR12D	2.12282	2.79154	2.72153	3.75675	5.18436	7.86908	6.09448	7.0464	5.39648	5.60801	6.70003	9.19151
LTR12E	1.933	1.8836	3.2149	2.86879	2.30647	4.75975	2.25247	1.4915	3.03993	0.990347	1.95566	2.43949
LTR12F	1.33102	2.32199	2.89104	4.29057	6.28232	5.10145	5.95108	4.95255	3.42216	3.23295	4.80587	5.7523
LTR12_	2.50535	3.56392	2.95921	3.60774	5.56791	8.44835	6.98291	3.77656	4.7647	3.87016	6.21642	6.2563
LTR13	17.4939	33.5601	28.783	37.4998	45.6527	57.9354	47.2484	35.4488	31.7429	33.7121	42.9532	45.2299
LTR13A	6.15238	6.37245	6.78114	13.9402	13.8698	19.5665	14.3988	10.4302	9.124	8.85512	12.3145	13.254
LTR13_	0	0.618167	1.17544	1.27559	1.85394	2.70535	1.82663	0.531587	0.789729	0.854728	1.00771	1.39687
LTR14	1.53932	2.55948	2.70872	3.77052	3.96652	4.55253	3.2692	2.80747	4.98582	2.80851	4.59295	3.61035
LTR14A	0	0.458991	0.55779	1.15404	1.45818	2.34639	1.62599	1.28116	2.21019	0.72722	1.33298	1.46326
LTR14B	1.2564	2.00965	1.91052	1.73097	3.23141	4.18624	4.2111	2.84227	4.36983	2.58586	3.82195	3.7951
LTR14C	0	0	0	0	0	0	0.64694	0.439802	0.579134	0	0	0
LTR15	0.82391	1.61257	1.2163	2.13109	3.34823	3.71057	5.20434	2.4453	2.44816	3.24625	4.95093	3.64965
LTR16	5.03814	9.64901	8.56581	10.0566	14.5113	16.6659	18.4017	13.8251	17.7426	9.35237	18.0455	15.4569
LTR16A	7.53498	11.3298	10.9578	13.187	21.7611	33.6029	27.751	20.5227	38.3271	17.9101	27.5839	28.307
LTR16A1	2.70557	5.44063	5.40275	6.71438	10.0488	24.5282	18.3238	11.7217	20.2476	7.68761	14.5177	15.4628
LTR16A2	3.27022	4.34196	3.91133	4.33335	7.96969	13.0412	10.0713	7.38103	13.657	6.47017	9.53711	9.16181
LTR16B	1.90557	3.05462	3.1794	2.55848	4.57917	7.9146	6.25306	4.43894	7.71196	3.13753	4.64545	5.4752
LTR16B1	1.97911	3.40579	4.12505	5.26026	8.17165	12.8203	12.2759	10.3067	13.2148	6.39983	10.4998	9.72125
LTR16B2	3.59263	5.04086	4.19603	5.07568	8.76903	10.4918	9.75175	6.86474	11.2141	5.80257	9.10694	7.9681
LTR16C	20.4955	28.3842	27.4824	27.3606	48.0504	65.1666	66.4764	48.7098	57.9714	48.062	56.027	56.2991
LTR16D	3.1423	5.39899	4.42906	8.15196	7.27494	5.62525	8.60035	5.22026	8.37113	5.82611	10.0903	7.00175
LTR16D1	7.84423	2.46499	1.49367	1.35395	2.55379	2.80007	2.16692	1.31902	1.10562	10.6764	15.5442	3.87759
LTR16D2	0.736379	0.793212	1.49354	0.845906	1.73049	2.8524	2.54851	1.24254	2.57978	1.20947	1.85465	1.78532
LTR16E1	3.27822	4.6016	4.35624	5.75146	8.21772	14.7298	12.3071	8.08815	10.6877	7.91919	12.9729	11.4048
LTR16E2	3.29835	4.94161	4.48833	4.81081	8.58586	16.1955	12.2708	8.16502	14.2151	7.62021	11.835	11.7373
LTR17	9.00666	8.3897	8.65857	8.6666	10.9059	13.161	13.5053	12.4384	15.565	11.2513	15.0018	11.6735
LTR18A	0.793948	0.947684	1.04215	0.514016	0.771175	1.12505	0.95307	0.554533	0.684432	0.580999	0.71805	0.894966
LTR18B	0.712333	0.885103	1.02652	1.57952	2.06642	2.52901	2.17508	1.6636	2.05329	0.645512	2.30895	2.15924
LTR18C	0	0	0	0	0	0	0	0	0	0	0	0
LTR19-int	1.34136	1.68959	1.79094	1.60903	3.07915	4.13338	4.36707	2.42847	5.05426	2.43743	4.43115	3.4853
LTR19A	1.72667	1.50394	2.4516	1.57491	4.81112	6.56663	6.00993	4.7992	8.63437	3.42159	3.5058	3.37773
LTR19B	0.816512	1.01095	1.04589	1.15732	1.54495	3.14753	2.2338	1.20468	1.52681	1.25935	2.77043	2.0857
LTR19C	0	0	0	0	0	0.863411	0.674419	0.478046	0	0.656217	0.404613	0.671514
LTR1A1	3.12573	5.01872	4.56304	7.17204	8.34836	5.9387	6.5757	4.11081	5.79134	3.54629	4.77767	5.6019
LTR1A2	2.42537	3.79928	3.78897	4.44371	6.07676	14.9909	8.39862	6.13773	11.4247	5.7251	8.03211	8.57597
LTR1B	0.695545	1.15466	1.02388	0.838648	1.48374	3.00833	2.20689	1.31941	3.00097	1.85649	3.27948	2.74907
LTR1B0	0	0	0	0	0	0.915739	0.719793	0.707508	1.00032	0.553691	0.585267	0.721891
LTR1B1	0	0.461209	0.614118	0.976427	0.956649	1.28203	0.990498	0.860482	3.00097	0.703515	1.4484	1.57332
LTR1C	0	0	0	0.491986	0	1.12505	0.566434	0.516289	0.895026	0	0.95324	0.811331
LTR1C1	0	0	0	0.591269	0.687901	1.12505	0.947149	0	1.00032	0	0.572997	0.461259
LTR1C3	0	0	0	0	0	0	0	0	0	0	0	0
LTR1D	1.4623	2.15438	1.96985	3.54372	4.10744	5.62525	3.71296	3.72837	5.63235	2.04404	5.47726	4.11643
LTR1D1	1.19938	1.70797	1.87602	2.23259	3.15431	7.30446	4.09174	3.52607	2.57978	2.86641	3.78496	4.21193
LTR1E	0.497477	0.529762	0.699312	0.941619	1.61259	2.85187	2.20957	1.24292	4.36983	0.858107	3.20386	1.95866
LTR1F	0	0	0	0.485881	0.5271	0.863411	1.02185	0.401558	1.42151	0.715609	1.68325	0.997939
LTR1F1	0	0.673445	0.404655	0.999208	0.878525	1.59548	1.71058	1.0517	2.05329	1.10197	2.03172	1.62149
LTR1F2	0	0	0	0.472352	0.432711	1.43902	1.18476	0.478046	2.89567	0	1.54603	0.914844
LTR2	6.20929	6.19972	6.29638	9.3964	10.1483	35.1052	23.931	13.1998	25.2987	12.0685	19.3555	18.4723
LTR21A	1.80987	1.96541	1.85022	2.2109	2.09916	1.70066	1.64757	0.898726	1.63211	0.91561	0.724504	0.990452
LTR21B	0	0	0	0	0	0.601771	0.523516	0	0.579134	0	0	0
LTR21C	0	0	0	0	0	0	0	0	0	0	0	0
LTR22	0.821557	1.00326	0.880975	0.488607	0.929837	0.601771	0.926864	0.745751	0	0.485657	0.598838	0.486976
LTR22A	0	0.747922	0.618256	0.616106	0.853675	0.968067	1.25249	0.63102	1.10562	0.460287	0.869069	0.836583
LTR22B	0	0.586089	0.408341	0	0.992758	1.64833	1.97572	1.43414	1.10562	0.666562	1.64448	2.0274
LTR22B1	0	0	0	0.530449	0.774433	1.49135	1.40267	1.08994	1.00032	0.893194	1.3832	0.944136
LTR22B2	0.695869	0.900918	0.989922	0.664675	1.21063	0.863411	0.86931	1.01346	0	0.91659	0.768668	0.698215
LTR22C	0	0	0	0	0	0.671368	0.514053	0.688386	0.631783	0	0	0.572753
LTR22C0	0	0	0	0	0.438113	1.49135	0.866158	0.478046	1.10562	0	0.446	0.639852
LTR22C2	0	0	0	0	0	0	0	0	0	0	0	0
LTR22E	0	0	0	0	0	0	0.5866	0.401558	0	0	0.463867	0
LTR23	2.08269	2.41296	2.28897	2.6791	4.42362	4.44788	4.89062	2.81091	3.5801	2.61388	3.82089	3.44119
LTR23-int	0	0.527473	0.511322	0.615393	1.18086	1.54367	1.05276	1.6506	0.579134	0.575783	0.825078	0.956261
LTR24	1.98393	2.7217	2.40233	4.33967	5.95104	8.39864	5.6372	3.88173	4.47513	4.32235	5.0177	5.43046
LTR24B	1.38833	2.40359	2.33399	4.2765	4.85906	5.78224	7.04143	4.34066	4.79102	4.75439	6.4932	7.50234
LTR24C	0.415192	0.796863	0.637675	0.681122	1.91044	2.32859	2.39677	1.93207	1.31621	1.14725	2.53841	1.65503
LTR25	2.01453	2.69708	2.8146	2.78395	3.48082	11.2557	3.65164	2.17989	3.00097	2.15925	2.28531	3.09296
LTR25-int	4.52613	4.45854	4.14505	4.37865	9.59234	8.11083	9.49202	7.45522	6.81904	6.93798	7.38553	8.91905
LTR26	1.12935	1.52244	1.34667	2.58056	4.33433	7.90152	5.60501	3.27022	6.68742	3.6907	5.11957	4.8062
LTR26B	0.410426	0.420422	0	0.507336	0.924619	1.07272	1.27006	0.720128	1.63211	0	1.92442	1.37243
LTR26C	0.424575	0.785986	0.791764	1.0436	1.40254	2.79955	3.16651	1.58711	3.21156	1.68662	2.67285	1.98323
LTR26D	1.30178	1.25049	1.11965	1.14938	2.18919	2.11876	2.65518	1.74009	3.84335	2.1395	2.85512	2.14099
LTR26E	0	0.580191	0	0.563174	1.16359	2.51174	1.27752	1.19167	2.89567	0.599181	0.877285	1.08743
LTR27	0.725389	0.883072	0.672133	0.617977	1.42404	2.48558	3.10605	1.54887	4.58043	1.16334	3.34951	1.99156
LTR2752	0.548745	1.07424	0.764443	1.02027	1.11868	3.63679	2.01075	1.81657	2.47448	1.56714	1.96626	2.39506
LTR27B	1.45213	1.9915	2.3473	2.80948	3.43101	4.68335	3.61	3.23159	2.47448	2.03073	2.77887	3.28918
LTR27C	0	0	0	0.433239	0.857473	2.43325	1.55495	0.707508	1.8427	0	1.02836	0.889792
LTR27D	0	0	0	0.723572	0.837031	1.54367	1.20962	0.669264	2.05329	0.433646	1.78214	0.972695
LTR27E	0.844869	1.63489	0.893636	2.01534	1.35665	4.16007	2.11949	1.24292	3.73805	1.21307	2.90702	1.76807
LTR28	0	0	0	0	0.687934	1.22971	1.0877	0.592777	1.7374	0	1.42456	0.642307
LTR28B	0.591685	0.533425	0.455158	0.775528	1.21586	3.53214	2.06518	1.28116	2.36919	1.37015	2.17447	2.15401
LTR28C	1.29937	1.80229	1.84504	1.73322	1.97831	4.02925	3.70259	2.33286	3.40426	2.29987	2.68245	2.80216
LTR29	1.63685	2.05379	2.5367	9.51071	16.7463	6.86961	21.4677	8.90427	164.121	44.0349	12.3511	17.739
LTR2B	4.69039	6.72638	5.59198	11.3105	9.12034	6.73827	8.30541	3.98231	6.98541	4.81469	7.91765	5.06588
LTR2C	3.19084	5.22286	4.58614	5.19971	7.72334	9.92923	9.4526	5.73846	6.38101	4.45155	4.55443	5.92263
LTR3	0.551947	0.562751	0.732853	0.50662	0.993457	0.601771	1.04586	0.592777	0.684432	0.429375	0	0.629786
LTR30	0.784174	0.670757	0.675227	0.960465	0.976945	2.87804	1.97515	0.956092	1.94694	0.904258	2.03613	1.67927
LTR31	1.21495	1.96888	1.82646	1.65624	3.63541	4.2124	4.01772	1.6636	5.5281	1.8174	2.67381	3.10002
LTR32	2.37644	3.23721	2.92996	5.14589	6.29979	10.0731	8.4161	7.01771	8.47642	6.16782	10.1315	8.96137
LTR33	20.5029	33.3499	31.6783	41.3184	60.09	89.2584	78.9596	54.4835	87.2461	47.3404	72.4721	65.5768
LTR33A	2.55058	4.03266	3.53762	4.84171	6.43053	11.7874	11.0365	7.15768	15.4608	6.39465	10.2482	9.83381
LTR33A_	2.49362	3.71208	4.11471	5.08056	7.78787	12.8988	9.94799	7.2793	10.6519	6.18086	7.38194	8.85813
LTR33B	2.09185	3.79809	3.32299	4.52748	5.43242	6.90572	7.68242	4.58159	6.14935	4.9394	7.09708	5.62387
LTR33C	4.45628	5.76905	4.64174	3.4272	6.22807	7.51953	7.07257	5.18967	5.00162	4.4034	5.55417	5.62745
LTR34	0.659076	1.31682	1.09653	1.80841	3.13209	3.74145	3.22923	1.85482	1.63211	2.12859	2.87008	3.21772
LTR35	0.462139	0.981295	1.02313	1.73274	1.65359	1.75299	2.06238	0.822239	2.36919	1.08284	1.03158	1.70732
LTR35A	0	0	0	0.501135	0.414865	0.915739	0.652176	0.401558	0.895026	0	0.613129	0.490599
LTR35B	0	0.63988	0	0.725025	0.633653	1.75299	1.366	1.35765	1.8427	0.667783	1.05566	1.49445
LTR36	0.445379	1.30142	0.930238	1.22486	2.40607	5.25844	5.02866	2.81053	7.63405	3.37179	4.38676	3.71297
LTR37-int	2.49612	4.17309	3.29073	4.7067	8.00648	7.04857	8.79175	7.9738	4.26454	10.2136	10.9507	9.52302
LTR37A	2.39257	3.8759	3.54581	4.44296	8.83412	6.89421	12.2872	8.01205	10.0559	9.1159	11.9027	10.3991
LTR37B	1.75682	3.51972	3.35164	2.89503	6.60473	7.90989	7.56956	5.98513	4.15924	6.1911	7.07705	6.21044
LTR38	0.450538	0.483877	0.429656	0.741804	1.0672	1.70066	1.88619	0.975213	1.52681	0.598331	2.08922	1.2271
LTR38-int	0	0	0	0	0	0	0.599385	0.592394	0.895026	0.490791	0.785661	0.41298
LTR38A1	0	0.417919	0.7265	0.695741	1.32047	1.33436	0.890659	0.93697	1.21092	0.907361	0.950794	1.01512
LTR38B	0.767599	0.465179	0.667504	1.42805	2.12538	3.2705	3.27933	3.07861	1.7374	1.66715	2.80401	2.53172
LTR38C	1.42083	1.97923	2.0346	5.25388	3.10059	1.90997	4.31685	1.81657	1.948	4.30788	4.51243	3.09934
LTR39	2.84293	4.68813	3.82772	4.25445	8.53464	10.5964	12.9377	8.50922	9.84529	6.89521	10.299	10.2239
LTR39-int	0	0	0	0	0	1.12505	0.858299	0	0	0.537477	0.683222	0.563822
LTR3A	0.826976	1.43035	1.436	2.65968	2.09685	3.192	2.36894	1.77833	2.21124	1.06813	2.40484	2.574
LTR3B	0	0	0	0.530853	0.639345	1.07272	1.26749	1.39589	0.684432	1.31462	0.929228	1.19213
LTR3B_	0	0.544107	0.534066	1.16813	1.2673	2.38092	1.40624	0.898726	1.00032	0.837139	1.24999	0.99419
LTR4	0	0	0	0.637317	0	0.706427	0.601397	0	0	0.56027	0.637378	0.719519
LTR40A1	0.521235	0.819408	0.524264	0.522331	1.11375	1.33436	1.80241	0.975213	0.895026	1.26863	2.29522	1.2002
LTR40a	4.45222	6.4141	5.37652	7.16434	10.4292	12.3756	10.4053	8.08853	7.63405	7.08665	11.8827	10.3424
LTR40b	3.05847	4.98794	4.90324	4.86169	7.6799	9.13123	6.96396	4.57012	4.68572	4.58119	6.8339	6.87482
LTR40c	1.47999	2.78043	2.38821	3.58077	4.95585	6.09568	5.20016	4.37852	7.00226	3.05289	6.3712	5.70888
LTR41	4.43681	6.57569	6.23166	7.46845	12.227	18.9333	14.1872	10.3877	15.5556	9.45669	14.1911	13.6711
LTR41B	7.53081	7.40578	7.5372	5.61966	8.57004	10.1867	10.1277	6.69264	9.73999	7.15966	9.39771	8.03161
LTR41C	2.54224	3.09616	2.88282	2.58576	4.53996	7.82303	5.90938	5.55145	7.84464	5.00949	7.2056	8.13702
LTR42	4.0818	5.48439	5.11191	5.10282	7.27909	7.87536	8.48954	7.85907	4.89632	5.40852	6.54578	8.00169
LTR43	2.08293	3.19418	2.94935	4.14686	6.85368	8.92191	8.45874	4.95255	7.84464	4.43623	7.92165	8.36392
LTR43-int	1.1702	0.848104	0.986	1.0235	1.33631	2.27627	1.38641	1.93092	0.789729	1.56208	0.982315	1.4084
LTR43B	0	0	0	0.501103	1.12234	1.43902	1.17407	1.16605	0.895026	0.650338	1.25016	1.11205
LTR44	0.902695	1.7088	1.23249	1.03532	2.26458	2.59023	2.30021	1.47238	1.00032	1.51321	2.00591	1.86854
LTR45	0.430986	0.4234	0.410727	0.720609	0.972806	1.17738	1.14177	0.478046	1.10562	0.537745	1.33086	0.677848
LTR45B	1.77106	1.93694	1.71562	2.40444	3.28112	7.03811	3.982	2.42809	1.8427	1.58551	3.79228	3.67894
LTR45C	1.46865	2.04532	2.2825	2.64037	4.4629	7.56924	6.27527	3.58879	5.6692	3.05442	4.64171	4.61233
LTR46	2.26754	3.36681	3.83992	3.62748	4.82094	8.20868	5.19539	4.74298	7.60561	3.60186	3.21346	4.63821
LTR46-int	0	1.46543	1.11569	1.79481	2.03283	7.87536	4.12887	1.54887	1.31621	1.51559	1.55059	2.17351
LTR47A	2.46423	2.9995	3.06403	2.77558	4.93301	5.93922	6.97513	3.76662	4.68572	3.84673	4.71697	4.50012
LTR47A2	1.40615	2.65223	1.65555	2.73048	2.95766	3.06118	2.76217	1.01346	2.05329	1.37145	1.50893	1.65222
LTR47B	0	0	0	0	0	0	0	0	0	0	0	0
LTR47B2	2.48718	3.89833	3.05376	7.00041	6.089	3.74145	6.60924	4.97741	10.4939	7.05866	10.5319	9.60508
LTR47B3	0	0.450379	0	1.19508	1.00816	1.64833	1.54151	0.478046	0.99927	0.60419	0.877667	0.726252
LTR47B4	0.516609	0.756843	0.826149	0.7009	1.1108	2.11928	1.58909	1.20468	1.31621	0.971458	0.78216	1.55275
LTR48	3.54705	4.98166	4.76965	4.18047	7.96635	6.72414	9.4501	4.60836	9.42304	5.2192	6.08304	6.75586
LTR48B	2.65381	4.26468	3.54007	7.32758	12.2224	12.61	26.9913	25.9866	24.8333	37.4853	30.1745	33.7647
LTR49	1.91354	3.83687	3.06619	4.21393	7.28464	9.52369	7.96428	6.52131	8.85549	5.15839	9.67107	7.16292
LTR49-int	4.90697	8.76959	7.68938	7.63439	14.1728	16.7449	16.8644	11.0715	11.7933	10.7245	17.2013	13.8557
LTR5	0	0	0.401803	0	0	0.896378	1.23149	1.58329	2.52713	0.734932	1.12312	0.756936
LTR50	5.29313	9.72191	9.6384	13.2284	20.5285	25.6669	26.231	17.6112	23.4286	18.7532	25.829	24.1605
LTR51	1.93205	2.12437	2.39876	3.02853	4.20171	3.79378	4.76049	2.46672	6.05459	2.85738	4.44015	4.68979
LTR52	3.61463	4.10922	3.87711	3.46569	6.0666	7.4829	5.83601	6.02338	6.58107	4.86896	4.98756	4.95634
LTR52-int	2.46908	3.31072	2.50328	4.54881	4.8518	3.95076	5.56897	4.18768	4.05394	4.09053	5.48657	5.45199
LTR53	2.98542	3.98146	4.31966	4.62038	6.19605	8.13752	7.54552	4.3594	8.16053	4.01712	7.43078	7.21503
LTR53-int	6.85535	10.2732	7.07124	6.39031	8.53892	9.91615	7.17814	10.1919	5.7387	9.80363	6.3184	10.4862
LTR53B	0.539591	0.625592	0.662008	0	1.18591	2.48558	1.7944	0.745751	2.79038	1.08343	1.98558	1.57287
LTR54	2.51291	4.33632	3.47661	4.71877	7.49054	7.79686	8.91707	5.83216	5.47545	4.95598	8.64307	6.66448
LTR54B	0.920545	2.15859	1.58671	2.19165	3.82545	5.33745	4.85349	2.50496	4.21189	2.84652	4.97643	3.7087
LTR55	0.802257	1.39386	1.41968	1.35878	2.80095	4.52637	3.87838	2.39023	4.26348	1.70586	3.06334	2.98478
LTR56	4.16722	5.21898	4.50813	5.45583	7.78357	8.76493	9.55028	6.02338	6.37048	5.52048	7.12928	6.59669
LTR57	0	0.72157	0.692287	1.13917	1.14539	2.43325	1.40996	0.669264	1.00032	0.687125	1.23463	1.21241
LTR57-int	11.3189	14.3201	11.4152	2.39649	8.73732	3.50597	6.14113	11.7217	1.00032	7.58248	3.82357	6.43832
LTR58	0	0	0	0	0	0.732591	0.606687	1.01346	0.895026	0.627827	1.02016	0
LTR59	0	0	0	0	0	0	0.43819	0	1.21092	0	0	0
LTR5A	19.7313	37.4454	39.6023	56.4258	60.837	51.5943	58.472	39.8514	61.1261	43.1566	48.9557	52.2
LTR5B	8.31009	15.9399	15.9049	27.4999	30.4414	40.4872	33.7464	18.6568	19.0188	21.2812	23.9929	34.1953
LTR5_Hs	27.727	34.7029	34.9822	47.2333	48.1058	51.7623	48.0407	35.9012	39.7792	39.8031	51.2407	48.0487
LTR60	0	0	0	0	0	0.706427	0.420852	0.478046	0	0	0.576347	0
LTR60B	0.85291	1.18876	1.39626	1.34437	1.57712	1.90945	1.7194	1.81696	1.31516	1.35021	2.04985	1.86667
LTR61	1.49414	3.46782	2.58859	3.76978	4.99236	3.63732	6.30773	2.77267	5.95034	3.38333	4.76453	5.4875
LTR62	1.33771	2.70066	3.0926	6.1275	5.92252	3.95076	4.74165	2.50496	4.15924	3.22027	3.68312	4.29133
LTR64	1.73816	3.62574	2.71604	3.40207	3.69961	3.47981	2.47613	2.16077	3.21156	2.92613	3.93258	4.1409
LTR65	1.08961	1.86757	1.71482	3.11083	3.58239	9.28821	4.86453	2.69618	4.79102	3.25861	4.73564	4.54608
LTR66	1.08633	0.970602	0.859325	1.74732	2.1241	3.53214	3.64925	1.35765	2.52713	1.93183	2.48642	2.69887
LTR67B	13.0126	17.4003	17.8311	15.5309	29.5801	32.4695	26.7643	20.7587	22.1651	21.3795	30.2741	25.4028
LTR68	1.39958	2.20339	1.76978	1.07141	2.24693	1.70066	2.0799	2.19901	1.31621	1.92328	3.16404	2.042
LTR69	0	0	0	0	0.475819	0.758755	0.792541	0.439802	0.789729	0.709846	0.957969	0.800075
LTR6A	3.09767	5.47128	3.60367	8.35375	11.5044	14.9538	31.4777	15.9411	20.4519	26.6774	22.3648	29.2278
LTR6B	0.66706	1.11955	0.949426	1.36919	2.17118	4.56718	2.98549	1.23909	3.56431	1.5678	1.96012	1.94195
LTR7	2.47622	2.86547	3.46193	3.42961	6.2184	14.3954	10.9144	5.60767	17.8479	5.70856	7.43225	8.03646
LTR70	7.558	7.73958	5.91458	4.14267	5.53994	5.88689	5.07819	3.46105	2.15859	2.2947	4.28177	3.01801
LTR71A	0.963873	1.68849	1.94772	2.11715	2.48591	1.85764	2.03272	1.0517	1.7374	1.23086	2.02544	1.85242
LTR71B	0.807337	1.56866	1.40946	3.16046	5.50968	5.62578	4.15354	4.45539	2.68508	2.38022	4.2537	4.18058
LTR72	1.00376	1.77811	1.36131	2.45609	3.99331	3.42748	5.25621	4.53187	8.79231	4.68481	6.67734	6.29505
LTR72B	0	0.517391	0	1.44789	1.49798	0.915739	2.47447	3.00213	1.63211	2.70625	1.91945	1.70091
LTR73	0.568946	0.761242	0.811541	1.22555	2.40602	3.51068	3.01386	1.95081	3.52746	0.92071	2.66704	2.5559
LTR75	2.1995	3.10708	3.4153	4.53293	6.07378	6.1747	5.59526	4.68485	3.21156	3.617	5.16875	4.34108
LTR75B	0.625332	1.73765	1.02807	1.40164	2.24111	1.62217	1.63794	0.898726	1.21092	0.812924	1.51111	1.44347
LTR75_1	0.495835	0.745015	0.864299	1.19841	1.86032	2.85187	2.12965	2.12252	3.31686	2.61128	2.63453	2.78537
LTR76	14.1835	18.9764	16.8802	14.4438	18.3224	16.195	18.1771	16.169	22.7968	11.7717	23.9733	17.0229
LTR77	1.28421	3.03994	1.9586	1.5693	2.18063	1.33489	2.04754	1.16643	1.10457	1.45948	1.5739	1.73325
LTR78	7.99455	12.4404	10.514	11.64	20.5853	26.4246	26.8484	21.8945	24.6406	19.311	26.8283	22.2574
LTR78B	3.31385	4.64616	4.87374	5.90026	9.82446	15.0077	14.3824	9.15898	12.1618	8.94604	13.183	11.7133
LTR79	10.9421	16.6929	14.3014	15.7849	27.4526	26.4544	30.9494	25.0305	27.8511	26.6926	47.5892	30.0575
LTR7B	3.12991	6.87979	6.67121	10.0382	14.0184	26.5224	22.3727	8.8863	27.2204	10.0167	11.3377	14.2937
LTR7C	1.97696	2.40956	2.23886	3.60322	5.03498	9.50589	7.95542	3.90391	8.89656	5.46649	5.29935	7.92178
LTR7Y	0	0	0	0	0.753443	1.53321	1.58377	0.697947	1.99959	0.756976	1.07821	1.31596
LTR8	14.8244	16.3108	16.5623	24.8041	35.5894	57.4587	41.5747	25.4626	35.0071	25.9691	36.4995	36.4709
LTR80A	0	0.770655	0.775594	0.844835	1.4185	1.22971	1.23739	0.592777	0.683379	0.8374	1.63556	0.950594
LTR80B	0	1.02973	1.06116	1.50612	3.3966	2.27627	2.67747	3.92036	1.10562	5.05138	3.48133	3.6206
LTR81	0	0.523879	0	0	1.02801	0.863411	1.01926	1.43414	0.684432	1.02763	0.673423	1.14933
LTR81A	1.68224	2.80413	1.86261	1.74762	4.19164	3.11351	4.38252	2.92564	3.5264	2.62347	3.48416	3.53889
LTR81AB	0	0	0	0	0	0	0.614107	0.516289	0.473837	0	0.583853	0.484065
LTR81B	5.36185	10.2293	11.6981	8.23173	19.1249	16.5095	19.4072	15.2783	22.3756	10.495	13.6698	11.2721
LTR81C	0.677806	0.910831	0.955147	0.925173	1.79848	2.74722	2.57197	1.81657	2.68508	2.35652	3.20391	2.29303
LTR82A	1.76007	4.00825	2.51867	2.99997	5.36404	6.04388	6.15282	9.08287	5.5281	6.60728	7.09554	6.91612
LTR82B	5.95192	4.26888	3.30305	3.92253	7.55087	9.13123	7.87977	6.78825	11.1089	7.64519	8.33752	8.45806
LTR83	2.05045	2.50398	1.89448	1.88412	4.30408	5.04965	4.64053	5.18202	2.79038	3.77784	4.54473	4.37487
LTR84a	2.76079	4.36944	3.76357	2.13031	5.37115	4.31706	5.58515	5.02904	3.94864	4.16312	5.08349	4.15989
LTR84b	1.88836	3.7731	3.78084	3.38924	6.17682	9.44519	7.23175	5.98513	4.58043	4.58707	6.4166	6.63835
LTR85a	3.25055	3.76798	3.59829	2.71889	6.53812	8.65975	8.2515	7.43839	8.05523	5.46723	6.7376	6.58168
LTR85b	1.30017	2.33871	2.21596	2.99685	4.9542	6.28354	7.47613	3.97734	6.19463	4.24449	4.67884	5.06534
LTR85c	2.4697	2.46347	2.37395	2.29654	3.86402	5.78224	5.45147	4.18768	6.37048	3.92763	6.45128	5.01077
LTR86A1	1.32144	1.62063	1.90419	1.82031	3.23215	3.00886	4.01189	1.6636	2.57978	2.28821	3.95038	3.63107
LTR86A2	0.55761	0.790171	0.784234	1.36366	1.87614	2.63471	2.09975	1.27504	1.43836	1.40088	2.40508	2.13968
LTR86B1	0.625341	0.952701	0.874611	1.40407	2.31305	5.20663	2.76206	1.31941	2.68508	0.752099	1.78116	1.93675
LTR86B2	0.416769	0.448123	0.59257	0.780771	1.19612	2.27627	1.54584	1.16643	1.10562	0.872831	2.4295	1.35936
LTR86C	0	0.604022	0.714932	0.476689	1.12697	1.17738	1.7951	1.01346	2.05329	1.05159	1.60265	1.48878
LTR87	4.03686	7.40549	6.33707	4.99216	11.9733	14.9391	11.1999	8.97426	9.4241	7.91096	9.43384	10.4492
LTR88a	2.85122	3.00787	2.89631	2.9742	3.40637	4.22967	5.09751	3.80524	3.21156	3.69696	3.79535	4.09435
LTR88b	1.81978	2.66802	2.84603	2.44165	4.71167	5.67758	5.34231	4.87607	5.21221	3.80283	8.13777	4.87682
LTR88c	1.19113	1.23656	1.18299	1.55979	2.00045	3.63679	3.02292	2.19901	2.57978	1.55462	1.87519	2.44719
LTR89	2.03533	3.6925	3.22544	4.08081	6.24853	5.1543	6.8824	3.74788	2.94832	3.83239	4.51473	5.22061
LTR89B	1.1922	2.46443	2.1583	1.91116	3.83908	3.03502	3.21118	2.19901	2.34286	2.20484	3.99058	2.85646
LTR8A	9.48792	12.1285	10.2123	9.655	14.5623	22.5795	18.7484	13.7482	14.4247	10.8093	14.2267	17.4637
LTR8B	11.9845	11.5725	14.8333	16.841	18.7859	27.603	21.6856	19.4087	23.0064	15.6438	20.203	20.2786
LTR9	0.775029	1.78894	1.72504	2.60952	4.13637	6.25319	4.17506	3.95822	6.37048	4.24736	6.96643	4.19095
LTR90A	0.923689	1.31035	0.971088	0.927652	2.12175	2.59023	2.23201	1.6636	2.05329	1.06777	1.92844	1.46108
LTR90B	0	0.757076	0.589803	0.601845	0.956587	2.48558	1.69292	0.707508	1.8427	1.40311	1.37655	1.5722
LTR91	1.2801	2.28922	1.51329	2.22802	3.82921	3.89843	4.39999	3.42281	3.00097	3.02995	5.07065	3.94792
LTR91A	1.73334	5.09072	6.06377	7.08663	9.51881	6.98578	10.1334	6.13811	5.6334	6.6281	9.1061	8.31802
LTR9A1	0.907848	2.1095	1.86453	2.31811	4.73395	8.137	5.14126	3.34632	4.36983	3.67534	4.11353	5.2217
LTR9B	1.17185	1.99289	1.47942	2.36702	4.16286	8.58178	6.80238	3.11686	8.89761	3.90402	4.54445	4.64841
LTR9C	0	0	0	0	0	0.497115	0.699676	0.63102	0.684432	0.487549	0.926266	0.463621
LTR9D	6.15634	7.88639	6.66267	4.875	7.75465	6.88112	8.46364	6.97947	7.42345	7.49042	8.9107	7.32352
Looper	1.3818	2.44678	2.13867	1.94746	5.12885	2.74722	5.51598	2.58106	4.78997	3.07383	4.21295	3.9976
MADE1	4.59708	7.05579	5.84033	4.31999	11.2724	12.5849	12.0008	9.27371	8.26583	9.75575	11.9215	10.2561
MADE2	2.3471	3.35354	3.00405	3.09994	6.56715	7.45673	6.97253	7.0942	3.52746	5.99499	6.6902	6.75644
MARE10	0	0	0	0	0	0.444788	0.716283	0	0.789729	0.680404	0	0.400763
MARE4	0.867543	0.937836	0.866844	0.688873	1.44442	1.12505	1.43789	0.898726	0.789729	0.999226	1.4807	1.0515
MARE6	0	0.425783	0	0.475421	0.807397	1.54367	1.0179	0.63102	1.7374	0.452837	0.8222	0.73736
MARE8	0	0	0	0.456018	0.668906	0.706427	0.858895	0.975213	1.31621	0.609627	1.20237	0.819319
MARNA	14.9427	21.5177	17.2133	13.8166	29.4579	23.3555	29.9091	23.5516	17.9711	23.3034	28.3973	23.8888
MER101	2.49021	4.85238	3.86122	4.31988	5.65712	3.58446	3.12573	2.23725	1.68475	2.22998	2.94479	2.55814
MER101-int	19.3729	24.5825	18.2313	7.45661	25.5275	19.096	24.9626	25.25	8.6986	21.7352	19.3185	21.4744
MER101B	0	0.468438	0.460679	0	0.715945	1.80531	0.794152	0	0.789729	0	0.806091	0
MER102a	6.02353	9.25811	9.04421	10.4033	16.4415	24.4628	21.2502	16.2861	17.1287	14.136	17.0618	18.9504
MER102b	8.46852	12.2538	12.0891	12.1606	21.2594	36.3193	30.8238	23.5707	23.6382	20.0753	25.8664	26.0917
MER102c	10.242	12.8365	11.3847	10.5199	19.6462	24.8631	23.7701	15.4657	22.0903	14.2459	18.9014	19.4121
MER103C	39.5151	44.4668	39.9759	28.7807	60.819	76.7536	67.6779	48.4249	46.0412	56.4522	72.3358	54.8094
MER104	10.1176	9.92878	9.73352	4.81059	12.8913	13.4038	15.5661	12.5497	7.14336	11.1395	16.3039	11.6203
MER105	1.78342	2.79298	2.66687	2.55084	5.2556	7.24742	5.23075	5.02904	4.47513	3.7884	6.93874	5.32429
MER106A	0.88311	1.83471	1.60292	1.69226	2.9785	5.72991	4.2873	2.81091	3.10627	2.81814	2.86777	3.18462
MER106B	2.94799	4.16753	3.21654	3.38489	6.29776	5.36361	7.37756	4.18692	5.31751	5.64418	7.29863	4.90371
MER107	0.692789	1.05661	1.10416	1.16941	2.22373	3.68912	2.9716	1.58711	2.68508	1.63195	2.50612	2.38278
MER110	0.894137	1.27541	0.954054	1.23966	2.71167	2.95653	3.1177	3.07861	3.00097	3.47779	3.60612	3.0585
MER110-int	0.887668	1.42299	1.20833	0.845425	2.30116	3.00833	3.72834	2.58145	3.73805	2.1289	3.9282	3.35739
MER110A	0.616585	1.2814	1.09909	1.78699	2.72605	3.00833	4.02594	2.31336	7.84359	1.86559	3.60638	3.30209
MER112	12.7765	18.9054	15.0425	11.8657	28.859	28.8269	36.6663	22.0088	19.5326	25.9855	35.4605	27.086
MER113	6.43843	9.94046	8.89608	10.1669	21.1407	27.131	26.5586	16.8846	22.6915	17.4568	22.7015	22.1426
MER113A	3.61366	7.21205	5.58952	5.13345	10.1633	9.0789	12.5544	9.08287	9.4241	7.61928	10.3625	8.72102
MER115	4.54544	8.15609	7.43679	8.73027	13.4249	22.5131	16.0847	14.3605	19.5326	11.5734	18.0369	16.1383
MER117	6.64229	9.86482	9.8956	13.0817	20.5309	36.2633	26.3425	16.1943	24.0246	15.8388	22.0954	22.1368
MER119	3.15105	4.14452	4.21427	3.91906	8.34547	12.0878	9.10086	5.06729	5.00162	4.83221	9.06929	7.41112
MER11A	5.76944	12.3689	10.4082	15.428	22.8256	20.9777	26.5792	17.8667	19.1883	21.2175	29.3947	24.9366
MER11B	6.27417	8.40597	8.02642	7.98889	12.4234	13.2018	15.161	13.835	15.0849	13.9284	18.478	16.4467
MER11C	14.5463	23.3295	19.9253	23.6926	38.8235	43.2009	38.7983	32.6104	26.8624	30.3611	39.2097	35.4524
MER11D	7.78222	7.71645	6.67147	6.71795	9.41768	6.63518	9.00067	9.99192	7.43714	9.99105	9.61148	10.1898
MER121	1.05038	1.30983	0.953266	0.950506	2.15801	2.85187	3.22492	1.85482	1.948	2.18798	3.30604	2.15168
MER121B	0	0	0	0	0	0.549443	0	0	0	0	0	0
MER123	0	0	0	0	0	0	0	0	0	0	0	0
MER124	0.869537	1.24223	1.27922	0.861216	1.99203	2.74722	2.90219	1.62536	1.63211	2.60525	2.87073	2.61421
MER125	0	0	0	0	0	0	0	0	0	0	0.534963	0.410911
MER126	0	0	0	0	0.506765	1.22971	0.624059	0.554533	0.895026	0.722583	0.716627	0.855309
MER127	0	0	0	0	0.546718	0.444788	1.07554	0.592777	2.26389	0.493103	0.699311	0.519793
MER129	0	0	0	0	0.403653	0.915739	0.778634	0.745751	1.00032	0.738511	0.744937	0.854978
MER130	0	0	0	0	0.428641	0.497115	0.660073	0.478046	0.684432	0	0.795582	0.646519
MER131	3.26888	7.18171	5.68291	6.44128	12.4313	5.52635	7.32191	9.09779	2.8704	7.55595	7.3065	8.09374
MER132	0	0	0	0	0	0	0	0	0	0	0	0
MER133A	0	0	0	0	0	0	0	0.93697	0	0	0	0
MER133B	0	0	0	0	0	0	0	0	0	0	0	0
MER134	0	0	0.412216	0	0	0.497115	0	0.401558	0	0	0.50249	0
MER135	0.84844	0.933331	0.950126	1.19948	1.77392	2.59023	2.10132	1.39589	1.8427	1.46714	2.20541	1.94015
MER136	0	0	0	0	0	0	0	0	0	0	0	0
MER1A	18.2989	27.4612	28.9727	32.602	43.9221	59.8276	52.952	33.4594	45.1672	30.9045	44.4571	46.7171
MER1B	22.8453	34.8767	35.6052	51.6473	58.5363	148.778	77.9426	49.8579	57.5986	43.7634	62.7174	63.1434
MER2	30.2908	46.0354	42.9146	37.3044	78.8937	60.9029	71.941	49.843	46.4992	51.6897	74.6219	54.622
MER20	57.2495	70.4094	75.0093	75.1405	123.792	215.065	147.271	112.962	128.934	104.26	141.132	127.448
MER20B	6.84801	10.4408	11.7839	10.6453	21.4728	27.3932	26.1565	17.9355	18.7671	17.5843	24.6975	20.4514
MER21-int	5.16589	5.37904	5.66278	3.74296	8.44542	14.5723	10.7791	7.47587	11.4247	7.58028	9.70988	9.55368
MER21A	7.35564	12.7562	11.6687	15.8937	24.6383	40.1983	29.4835	21.0531	23.4286	22.5031	33.8055	30.012
MER21B	15.4152	22.6232	23.8061	22.1541	41.2854	77.6536	53.3478	28.3183	40.015	29.6456	53.9102	39.3115
MER21C	98.1486	96.4129	81.3297	113.281	88.0929	267.788	308.566	296.281	561.336	188.105	369.282	267.335
MER2B	3.71393	5.83362	5.98761	4.3643	9.87409	14.9527	11.3824	5.83216	4.31718	6.71264	9.23253	9.21443
MER3	19.1514	27.331	27.7814	26.5688	48.9634	64.8767	58.2092	43.2433	34.329	40.2732	52.4518	52.4849
MER30	16.0519	17.3427	14.8762	12.8359	25.3962	32.2235	30.6713	18.6943	27.83	18.4887	27.9296	22.6238
MER30B	0.533178	0.895846	0.485942	0.640806	1.29635	1.49972	0.930551	1.08994	1.8785	0.625509	0.731274	0.827893
MER31-int	7.89706	11.9307	10.6253	5.52523	16.6575	12.7073	16.8227	15.2309	10.2654	13.288	12.0093	14.4252
MER31A	5.83833	7.51962	8.64503	9.94316	15.5771	20.748	22.5492	11.1476	22.5862	11.659	12.8412	15.1152
MER31B	3.47003	4.95433	4.95055	5.20884	10.5213	19.6491	19.2013	11.358	32.8843	9.83338	16.2058	14.0735
MER33	19.7087	30.2017	26.5101	31.8077	55.6849	59.4362	62.2533	42.1334	40.2214	42.1072	62.6703	52.5979
MER34	5.64461	5.53527	5.66256	6.75301	9.33759	10.6377	11.7838	6.82611	9.52939	7.24009	10.529	8.35877
MER34-int	2.18464	3.111	2.70136	2.55888	5.46387	4.40078	7.21444	15.6608	2.52187	11.4715	6.99912	11.7388
MER34A	3.78427	5.04546	5.00166	3.91536	7.6282	9.03442	12.0158	7.52253	13.4517	7.87804	11.283	7.9494
MER34A1	2.34405	2.78385	2.59418	2.40262	6.22543	10.4912	8.15007	5.83254	7.00226	5.53582	7.57873	6.87128
MER34B	1.11479	2.82611	2.3704	4.38426	4.78508	6.22964	5.8655	4.52384	3.60643	3.85356	6.00352	5.06523
MER34B-int	25.6795	27.8209	21.5169	17.5667	32.9339	8.57132	28.8987	29.8423	15.1533	49.8745	41.6937	30.0864
MER34C	0.489937	0.485933	0.481651	0.513591	1.07871	0.915739	1.31745	0.975213	1.10562	0.415172	1.52821	0.908449
MER34C2	2.08855	2.73436	2.17136	4.96503	6.82097	6.35785	7.82604	5.02904	9.84529	5.12373	5.66666	5.41949
MER34C_	6.16384	9.82635	7.86466	6.68414	11.748	5.16372	11.8518	9.02168	4.71731	8.27721	13.4198	9.54866
MER34D	0	0.528879	0.666888	0.521756	1.38142	1.02039	1.30597	1.12819	1.52681	1.41896	1.4795	1.30398
MER39	6.27892	9.01774	8.46268	14.1176	19.1002	21.7004	25.6633	15.9667	27.0793	16.6735	26.1443	20.4737
MER39B	5.2854	12.4964	9.68241	10.5404	19.5892	21.376	23.7589	15.4313	32.3789	14.4488	20.2652	16.3814
MER4-int	7.74847	11.9291	9.44715	9.1628	19.9513	26.1127	23.7813	15.0519	15.206	13.6861	20.7122	21.8637
MER41-int	17.4193	31.9516	24.459	19.8523	38.7536	26.771	33.8706	36.0313	19.1641	27.3579	36.9879	32.2196
MER41A	8.05127	12.7468	13.4777	17.2572	26.2046	58.5094	33.7622	21.2451	30.2203	20.3431	28.661	29.0228
MER41B	7.12575	11.6437	10.3927	15.5898	25.0908	31.032	30.0788	22.4995	19.0051	19.5979	25.2617	24.028
MER41C	1.31475	2.35699	2.33806	2.88008	4.9097	5.36361	6.25757	3.91998	5.00162	4.05373	4.28257	5.49148
MER41D	0.904419	1.32441	1.45935	2.14723	3.23685	5.72991	3.74845	2.5432	2.15859	2.41871	3.60289	3.73693
MER41E	4.02681	5.78469	4.72064	8.04766	6.81667	7.03759	6.29603	3.75362	5.22169	3.66887	6.13928	5.17516
MER41G	3.8059	3.58626	3.22461	3.32386	3.69429	2.48558	3.64696	2.04604	3.63275	2.66195	2.94759	2.32547
MER44A	9.63304	14.837	12.2194	14.6569	22.6762	17.556	26.3858	17.573	28.4829	22.6819	32.3187	23.3916
MER44B	3.7851	8.68619	7.63001	5.71808	15.298	17.2667	18.1931	16.387	13.2137	12.7288	17.4094	16.8986
MER44C	4.05844	7.57009	7.17634	8.03918	16.6916	19.2567	18.3494	12.142	14.7416	13.2974	17.7862	16.4425
MER44D	1.41194	2.48887	2.306	4.55464	5.75594	2.74722	7.12207	3.69051	8.31848	3.93187	7.43025	5.75112
MER45A	5.58158	8.27754	8.18373	9.14782	13.426	20.0678	16.298	15.9281	14.4784	16.7996	16.4672	15.0988
MER45B	1.65831	2.50691	2.18524	2.92529	5.20809	4.52637	6.99733	4.57012	5.94929	5.13577	6.4771	6.71116
MER45C	0.485369	1.13409	1.01904	1.84926	2.61383	6.87066	3.53952	3.55245	3.73805	2.6146	4.38453	3.87333
MER45R	0.435718	0.892675	0.814123	0.970548	2.20502	1.85764	2.89316	1.20468	2.15859	1.94651	3.02249	2.19314
MER46C	8.5242	11.9732	11.9824	9.11248	19.8841	28.1263	21.6326	17.2288	13.4243	17.2495	23.9005	18.8853
MER47A	7.85325	12.6036	12.0463	11.6751	24.2521	23.2592	24.7381	17.5244	16.479	16.107	26.7802	22.3329
MER47B	2.65604	6.01091	4.68993	4.1108	7.88227	6.30552	6.85073	4.9908	6.15988	5.15399	12.2108	6.81095
MER47C	1.13707	2.22903	1.90025	1.76248	2.77075	3.47144	2.84518	3.98346	1.47416	2.81479	2.43904	2.3918
MER48	0	0	0	0.506081	0.447011	1.54367	0.796285	0.93697	0	0.603412	0.730237	0.893914
MER49	13.9645	18.1354	16.8402	13.6807	24.6909	24.3356	25.6485	18.3986	16.1736	17.6533	17.1484	23.079
MER4A	3.67261	6.01664	5.57411	7.45202	14.344	15.8815	14.7357	11.0333	8.89761	11.0637	11.3055	14.0098
MER4A1	9.78841	13.8616	13.1882	15.4613	23.1123	27.9431	24.3757	19.7907	20.1813	15.1545	22.452	21.9348
MER4A1_	1.60657	2.42613	2.48672	2.73855	4.42473	4.68335	5.23788	2.83003	4.26454	3.73741	5.20017	4.45449
MER4B	4.98515	9.0691	7.72754	11.4625	15.8587	19.0474	19.6919	14.0163	16.7107	16.2657	23.9106	16.8135
MER4B-int	3.51392	4.46527	3.79456	5.11553	8.5159	12.7419	11.1817	8.81516	9.10821	9.34881	14.3248	10.3383
MER4C	1.35794	2.60957	2.79948	3.36078	6.13068	6.04388	8.08459	4.49363	8.16053	5.14933	5.57068	6.25278
MER4CL34	3.79727	5.04627	4.76814	6.35899	10.788	8.65504	14.6262	9.21672	14.689	10.0187	14.5718	13.6142
MER4D	3.79353	6.37042	7.07916	7.03838	13.7289	15.0197	15.8537	8.03079	13.5307	8.08624	9.3487	10.7204
MER4D0	1.11042	2.5376	2.01264	3.52549	4.88798	4.36938	6.09728	3.07861	5.37016	3.66382	5.00801	4.89047
MER4D1	7.13422	10.0461	9.67169	10.8614	17.0578	27.6632	23.235	13.4503	17.7815	14.8474	19.9327	17.8489
MER4E	2.23001	3.6949	2.62422	4.22728	6.97818	7.50906	8.11168	5.21988	7.54875	5.74181	8.72856	6.45438
MER4E1	2.82018	5.07257	4.4523	5.82085	9.02724	9.1307	10.7523	6.4062	8.85549	5.5155	5.93725	7.9674
MER50	11.186	16.4916	14.1271	18.9594	25.5023	41.6269	33.993	22.8123	27.7448	22.7507	28.3732	29.7475
MER50-int	2.89957	5.15034	4.48449	6.00426	8.27737	10.5964	11.5368	5.98513	12.8989	7.86663	12.4489	8.36255
MER50B	1.24411	1.75628	1.93462	2.41984	3.44806	4.94499	5.92349	2.65793	3.94864	3.77183	4.99746	4.49576
MER50C	0.6765	1.18782	1.33402	2.47688	3.32516	1.9623	2.17001	1.39589	1.10562	1.0162	0.973278	1.22863
MER51-int	3.21278	3.74178	3.20494	2.66392	5.81641	6.67181	7.07593	7.0747	6.05459	4.3762	4.42019	6.39206
MER51A	12.7806	14.211	13.6937	18.6227	24.5626	28.9374	36.1739	19.6955	33.853	21.0041	26.2322	27.4167
MER51B	1.68779	1.92647	2.14855	1.82669	3.07433	3.58446	4.01458	2.31374	2.26389	2.39779	3.52922	3.57219
MER51C	3.66526	4.60266	4.39495	7.43778	7.44451	6.8288	5.89208	4.22592	4.47513	4.16092	4.39533	5.17275
MER51D	2.03604	0.867634	1.27943	1.26472	1.54351	2.59023	2.08582	1.20429	1.31621	0.97389	1.37358	1.21443
MER51E	1.94894	2.36817	2.18558	3.81016	4.12036	4.31706	4.07126	2.69618	3.73805	1.7723	2.93677	2.91802
MER52-int	0.927068	1.39254	0.982016	1.06452	1.92034	3.9382	3.30306	2.67706	3.36003	2.88932	3.70917	3.08869
MER52A	9.9172	13.1558	14.3359	13.5036	17.93	50.9413	24.557	22.2291	28.5882	13.4461	26.4562	27.2417
MER52C	3.09591	6.78226	5.02993	5.93672	6.48707	17.2421	8.81816	5.98513	8.26478	4.75525	7.21543	8.47066
MER52D	6.50818	5.59294	6.02489	5.695	5.82651	16.9977	7.60279	8.59526	7.63405	5.1893	6.24558	8.86782
MER53	4.11403	7.9678	6.01381	8.14618	13.1636	15.5372	17.1729	12.6013	10.5824	12.2508	12.7923	12.4559
MER54A	3.05398	4.00894	4.21433	4.47431	7.39406	10.9873	12.4203	11.0899	10.1085	8.1935	10.9746	12.8944
MER54B	0.618164	0.924742	0.771296	0.926547	2.02182	4.84033	3.18211	2.12252	3.84335	1.2928	3.48396	2.3532
MER57-int	6.5228	8.72758	6.13847	6.99364	12.7553	13.9669	15.5879	15.0856	15.4503	14.7134	20.3877	16.5907
MER57A-int	13.5165	15.2447	14.075	7.53901	20.2107	21.9636	24.5135	15.6046	10.8277	15.7787	22.1816	17.7341
MER57A1	2.48784	2.91292	3.43198	2.96331	4.9964	6.51483	6.0189	4.11158	5.52705	3.18269	6.53273	5.42344
MER57B1	2.06789	3.68516	3.10366	5.16997	6.79058	6.14853	7.0358	5.79392	12.7936	4.60196	10.8918	6.9694
MER57B2	3.24252	4.13573	3.13202	5.43168	4.8166	6.4625	5.99868	4.11081	7.63299	3.04295	4.97214	5.51608
MER57C1	3.13875	3.87086	3.66357	2.6258	5.06976	2.79955	3.47488	3.61403	3.31686	4.58123	3.38261	5.38254
MER57C2	0.660503	0.854915	0.594143	0.679628	1.42289	1.38669	1.5478	1.54887	1.21092	1.52345	1.90934	1.65851
MER57D	2.21448	2.16506	2.03462	2.21336	3.65992	3.47981	4.0933	3.30808	3.00097	2.48602	4.07737	3.17099
MER57E1	4.52646	8.93587	7.31791	16.6379	12.265	9.53258	11.9447	7.36152	19.7917	9.53753	9.88095	12.3181
MER57E2	0	0	0	0	0.518759	0.81056	0.530964	0	0.473837	0	0	0
MER57E3	1.13472	1.18682	1.27252	1.06875	1.43612	2.74722	2.0103	1.85482	1.31621	1.09893	0.952876	1.50718
MER57F	0.841755	0.784891	0.774494	1.9849	2.08429	2.51174	2.20129	1.91218	1.789	1.56543	2.27837	2.02511
MER58A	38.2295	57.8278	49.512	46.3443	86.2319	113.843	104.008	77.2163	87.3029	77.4972	112.44	90.4228
MER58B	18.0468	27.9109	26.3462	23.0096	48.0185	54.7675	53.1843	39.6392	42.4348	38.7621	52.3855	49.7518
MER58C	5.54003	8.42126	7.81356	6.2116	13.5287	18.5503	17.3002	10.3067	11.9502	10.486	14.0761	13.1672
MER58D	2.2821	2.78187	2.3701	1.52612	4.66851	5.29402	6.03037	7.00509	4.68678	7.9374	9.34328	6.23239
MER5A	88.6393	132.12	121.598	115.569	206.383	262.343	224.042	186.495	164.698	174.46	223.685	194.357
MER5A1	28.7823	42.5263	44.3245	46.407	80.1902	112.75	94.3881	74.039	91.1136	68.3656	97.2245	89.0307
MER5B	57.8127	80.0088	70.4999	74.103	127.848	161.411	143.079	122.798	101.186	108.905	137.076	126.582
MER5C	1.55022	1.99594	1.7611	1.98876	3.85775	5.5206	6.12676	3.19335	5.15956	2.72525	4.03	3.80168
MER5C1	1.42499	2.29187	2.01539	1.78257	4.14214	2.74722	4.76868	2.84915	5.31751	3.69455	4.9039	4.63881
MER6	5.73467	6.12956	7.26644	7.98001	11.0866	11.1197	11.2535	5.52621	8.37113	5.16296	7.86155	6.9252
MER61-int	8.20387	14.4889	10.7242	15.6613	29.3551	18.0401	26.0766	24.2817	16.7423	26.1313	31.845	30.1317
MER61A	0.486504	0.576054	0.838899	1.41968	1.71117	4.16007	2.77117	3.00213	1.94694	2.11371	3.01106	2.23658
MER61B	0	0.80435	0.537826	2.36728	2.33095	4.52637	3.67951	1.96955	4.36983	1.63119	3.33033	2.60384
MER61C	0	0.433216	0.48074	0.688282	0.982385	1.85764	1.32326	0.975213	4.47513	0.631884	1.25002	1.09695
MER61D	0.711517	0.646831	0.535779	0.629867	1.41973	2.27627	1.65758	1.11557	0.789729	1.14135	2.09009	2.03905
MER61E	2.10614	3.58395	1.97418	4.0489	5.9822	3.06118	3.82597	4.30241	2.05329	3.15467	2.86353	3.6964
MER61F	0	0	0	0	0.64605	1.90945	2.08863	1.43414	0.473837	1.07541	1.11061	1.52739
MER63A	4.22235	6.67153	6.25746	7.78414	15.7774	20.3294	19.9847	13.9016	17.374	13.9339	17.7698	18.5324
MER63B	3.74432	10.2105	8.44026	7.46672	13.761	18.0008	21.2393	11.7595	9.21245	12.2909	12.7368	14.1885
MER63C	2.99389	5.59083	4.60401	6.61332	9.36636	6.52163	10.4481	8.96661	6.01879	7.42558	9.10769	10.2326
MER63D	2.34875	2.89005	2.50294	2.74573	4.98912	5.78224	5.42447	3.57578	4.00129	3.44169	5.10759	4.68286
MER65-int	23.1734	26.6335	20.3083	7.62763	18.434	14.9804	20.4125	13.409	10.0506	13.9732	19.7679	11.2736
MER65A	5.92455	7.39295	5.85341	7.95783	11.6143	16.6665	15.2559	10.8417	13.8718	12.0373	12.6617	12.569
MER65B	0.700453	1.55065	1.79423	1.69634	1.9269	1.49135	1.13771	0.93697	1.948	1.5103	1.41919	1.23176
MER65C	1.06804	2.07552	2.07629	2.15251	3.97328	6.20086	5.13485	3.03999	5.7387	2.18045	4.1094	3.63426
MER65D	1.56444	2.55221	1.92043	3.09499	3.68188	6.92299	4.58267	2.31412	5.73764	3.45839	4.23545	4.4795
MER66-int	3.98175	5.85554	4.90235	7.82361	13.4781	23.6789	13.292	8.81516	14.1614	7.20104	9.3869	9.68629
MER66A	0.623553	0.793246	0.877625	0.92094	1.64152	4.2642	2.29616	1.05208	3.00097	1.14705	2.82794	2.39669
MER66B	3.02989	4.01574	4.57404	4.49996	8.41695	13.2657	11.3826	9.73301	8.89761	7.46225	11.3263	11.2795
MER66C	2.04065	3.41323	2.84233	2.06705	4.58075	4.36938	4.57337	2.46672	3.00097	2.39641	4.18119	3.18125
MER66D	0	0.425972	0.411804	0.442613	0.79132	1.07272	1.23165	1.16643	1.52681	0.773264	0.8309	1.05533
MER67A	5.87603	5.166	5.38654	6.67935	6.27797	11.3813	7.51316	4.49363	9.84529	4.49556	6.23701	6.56926
MER67B	7.92866	8.73416	9.11124	6.98747	11.7589	8.66027	13.7488	9.61828	8.89761	9.51783	7.56463	9.84812
MER67C	5.95058	9.97863	8.03153	9.47461	14.6086	11.9815	14.9036	11.6261	10.476	12.1247	14.2628	13.2839
MER67D	1.47684	1.97026	1.56388	2.81704	4.07868	2.60698	4.32029	2.7501	7.21391	4.03227	6.01753	4.24199
MER68	11.5846	20.4998	18.3328	20.6248	34.4381	41.2077	32.4198	25.1448	25.9905	23.4251	33.2092	32.2807
MER68-int	49.4598	65.7988	48.9226	56.629	68.2998	30.3235	57.2761	60.2915	44.9082	59.3366	57.1259	65.2542
MER68B	1.63067	2.51091	2.51423	3.01788	5.47262	11.329	7.65542	4.34027	6.58107	4.51026	6.76273	7.9604
MER68C	0	0	0.464249	0.741248	0.872118	1.02039	1.05327	0.478046	0.579134	0.465795	1.60359	0.899165
MER6A	5.42241	7.28076	6.70901	8.28775	14.6423	13.9977	13.271	8.47059	16.479	8.90151	13.602	11.1911
MER6B	1.04006	1.63151	1.71098	1.15221	2.91922	3.87227	3.48205	3.11648	1.948	2.41932	2.863	3.21104
MER6C	0	0.415192	0	0	0.579822	0.706427	0.619223	0.592777	0	0	0.512726	0.415628
MER70-int	6.09394	6.47737	5.95621	5.30265	6.09766	6.72414	4.91461	3.38456	2.79038	2.57141	3.72769	4.05192
MER70A	4.38716	4.54953	4.55238	4.03955	5.21713	5.23227	3.61758	2.46672	3.00097	1.99753	4.42929	2.90489
MER70B	0.496031	0.423132	0.402652	0.818845	1.02494	2.48558	1.64822	0.783995	1.00032	1.09828	2.37088	1.87427
MER70C	0.64652	1.6762	1.26772	2.21993	2.20514	3.79378	2.59664	1.93131	1.52681	1.60357	2.40931	2.66436
MER72	8.84725	16.1475	14.1059	9.37652	18.8263	11.9559	16.6151	15.8138	12.6883	13.1004	16.3047	15.6739
MER72B	0	0	0	0.588133	0.850597	1.33436	1.36356	0.554533	1.52681	0.87586	1.00492	0.858562
MER73	1.03842	1.1269	1.11194	1.05055	2.26226	4.05542	3.41134	1.93092	5.4228	1.39687	2.82191	1.92416
MER74A	8.59733	11.0886	10.5872	10.9747	19.429	23.6391	26.6595	16.6739	34.906	14.5385	20.8819	19.3953
MER74B	8.32235	8.5605	10.1032	6.47838	13.3421	17.3467	14.542	7.91606	16.0568	8.03376	10.7058	10.7182
MER74C	1.116	2.20998	1.41889	1.80631	2.48129	2.38092	1.74904	0.745751	3.00097	0.838789	2.24336	1.41735
MER75	1.13777	1.66566	1.74735	1.51805	3.24875	2.93036	4.515	2.19901	1.948	2.00554	2.83177	3.2819
MER75A	0	0	0	0	0	0	0	0	0	0	0	0
MER75B	0	0	0	0	0	0.654099	0	0	0	0	0	0.448725
MER76	1.78627	1.91784	2.84601	1.54003	3.32744	5.04965	3.58126	2.96388	5.31751	2.37761	4.99598	3.30032
MER76-int	0.626506	1.42178	1.27986	1.36032	1.23462	1.22971	1.76309	1.62536	2.36919	1.57929	2.10975	1.6079
MER77	9.57856	19.7087	17.0815	21.7889	30.9752	35.3585	32.0181	31.0263	28.2007	24.1111	32.7765	26.2226
MER77B	3.31194	5.67615	5.20918	6.29633	10.3205	13.4478	13.4878	7.91682	11.5827	8.37465	15.2644	11.5593
MER8	6.26682	9.58108	8.77389	6.61976	14.8308	17.0783	16.4854	20.6195	14.1983	18.2811	20.9416	15.9316
MER81	4.23069	6.75447	5.75298	6.94312	10.8217	14.207	12.9381	9.50355	11.7406	8.75722	12.3796	12.9279
MER83	2.35962	3.73167	4.03785	5.83408	8.12212	8.97424	9.30235	7.24717	8.16053	5.67999	5.83104	7.76838
MER83A-int	0	0	0	0	0	1.38669	0.47021	0.554533	1.21092	0	0.941244	0.707283
MER83B	0	0.827151	0.943763	0.569082	3.10313	14.2065	6.51919	2.15121	8.79231	1.59669	2.71996	3.27991
MER83B-int	0	0.729073	0.689058	0.551533	1.24264	2.69489	2.27787	1.28116	2.47448	1.79254	3.25538	1.59716
MER83C	0.44091	0.798997	1.08732	0.719438	1.18659	2.3804	1.85592	0.564094	3.31686	0.649763	0.841689	1.05443
MER84	0	0	0	0.665375	1.1383	1.9623	1.62891	0.93697	1.8427	0.873635	1.58176	1.27547
MER84-int	0	0.41924	0	0	1.10541	1.27157	1.15754	0.995483	1.52681	0.82515	1.44738	1.04364
MER85	0.860051	1.60602	1.43638	1.51982	2.85543	4.60486	3.32773	2.19901	2.36919	2.47315	4.02613	3.04234
MER87	0.870376	0.609399	0.736977	1.07824	1.36441	2.32859	2.00929	1.01346	0.895026	0.627126	1.11032	1.43962
MER87B	1.89222	1.38172	1.75166	0.878655	2.06991	1.70066	3.16524	1.93131	2.89567	1.54516	2.16315	2.5043
MER88	0	0.553968	0.588999	1.23911	0.793096	1.64833	1.49823	1.01346	1.948	0.671465	1.08427	0.96062
MER89	5.79748	8.91666	9.5828	10.8645	16.4475	19.6491	19.0165	12.2953	23.3233	11.0553	13.6714	14.4621
MER89-int	1.46133	2.8702	2.34609	2.50603	4.6805	3.68912	5.25652	3.26983	4.58043	2.51268	5.60364	4.20185
MER90	1.72579	2.71566	2.64303	3.84315	5.14804	6.34424	7.10342	5.1759	8.00259	4.10637	6.39334	5.79294
MER90a	9.7029	12.8526	12.112	12.7569	19.043	21.9824	23.074	14.035	19.9022	14.6972	17.1192	17.8154
MER91A	9.65312	17.4071	14.1708	18.8982	24.3204	32.7222	30.5939	26.4707	26.8676	23.8399	28.0644	31.654
MER91B	3.24375	5.36981	5.23173	4.15424	8.56727	11.7476	9.96784	6.44406	8.05418	7.10215	7.59828	8.86855
MER91C	1.2181	2.31291	2.85168	2.90642	5.15633	8.72778	8.2784	6.79399	8.26478	5.99306	5.96011	8.72258
MER92-int	2.48859	4.09138	3.21774	2.47231	6.59932	4.39869	5.46613	4.43818	3.81702	4.26765	4.94298	5.23697
MER92A	0	0	0	0	0	0.549443	0.778299	0.669264	1.00032	0.528337	0.954622	0.769481
MER92B	4.53119	5.97193	6.32443	4.99324	7.82509	11.0674	12.4821	6.67352	13.4254	5.73885	8.54895	8.72731
MER92C	0	0	0	0	0.56711	0.811083	0.722628	0	0.579134	0	0	0.495452
MER92D	0.701937	0.428526	0.524061	0	0.876774	0	0.949837	1.24292	0.789729	0.849957	1.04545	0.598988
MER94	7.7335	10.7472	9.51299	7.62285	16.5603	20.1724	18.9584	14.0928	18.1638	14.6025	20.1143	15.6442
MER94B	1.35088	1.79107	1.72238	1.12117	3.67568	4.28618	4.20332	3.43772	1.73635	2.97742	3.04903	2.90263
MER95	1.09486	2.20337	1.58389	2.4204	2.44163	1.9623	2.52445	1.31941	1.63211	1.4109	1.79718	1.51465
MER96	1.49921	2.34475	2.23301	3.34025	5.39459	8.55562	5.38279	4.64661	6.15988	3.08995	3.63987	5.60015
MER96B	2.40223	4.00612	3.17057	3.41889	7.15192	8.81726	8.46772	4.72309	7.21286	5.22626	7.56241	6.88493
MER97a	0.695771	0.597451	0.645894	0.882447	1.14209	1.07272	1.28316	0.745751	2.05329	0.854724	0.908968	1.0324
MER97b	0	0	0	0	0.639332	0.497115	0.709171	0.478046	0.473837	0	0.486166	0.627531
MER97c	1.38369	1.27231	1.0341	0.926353	1.90452	0.654099	1.94693	1.24292	1.42151	1.24672	1.70554	1.13766
MER97d	0.730882	0.626869	0.870321	0	0.628837	1.33436	1.36726	1.24292	0.895026	1.85739	1.07694	1.37989
MER99	1.13118	1.64255	1.68039	1.38721	2.88734	3.95076	2.38587	2.31336	0.895026	1.11049	1.47561	1.54874
MER9B	0	0	0	0	0	0	0.420879	0.516289	0	0	0	0.690231
MER9a1	0.556689	1.17603	1.01825	1.09163	2.00988	3.10985	2.40148	1.04788	2.17755	1.62867	2.31356	3.08261
MER9a2	1.90795	3.27176	2.52156	3.66387	3.77726	4.53108	4.05122	2.04221	2.79353	2.4366	3.31425	3.11839
MER9a3	1.59479	2.76113	2.64627	6.13587	6.07083	12.5048	7.22877	3.93527	5.94929	3.59647	5.29579	7.29402
MERX	0.545904	0.931778	0.671557	0.934269	1.99699	1.33436	2.44651	2.16077	2.05329	1.65404	3.41975	2.32062
MIR	360.823	563.333	538.711	535.021	995.045	1331.96	1178.65	811.692	914.569	836.461	1119.45	1074.68
MIR1_Amn	35.2498	50.9211	53.5584	49.2249	75.0313	111.42	84.877	66.3528	71.6695	62.126	72.9699	82.2006
MIR3	418.49	420.883	390.682	330.124	525.242	723.043	602.885	426.018	468.121	416.717	544.672	530.114
MIRb	509.77	733.817	701.786	746.031	1308.92	1868.15	1558.94	1121.35	1264.06	1122.73	1503.64	1458.77
MIRc	364.727	439.971	399.424	372.811	620.088	766.89	699.592	528.725	582.324	533.521	687.739	658.436
MLT-int	1.37223	2.4481	2.1055	1.84562	2.71318	3.63679	2.19574	1.47238	3.00097	1.29571	2.17739	1.46871
MLT1-int	0.516422	0.646421	0.85325	0.621535	1.54672	1.38669	2.37613	1.20468	2.57978	1.27554	2.23355	1.75233
MLT1A	28.635	45.7981	39.9836	44.0161	69.5701	83.517	76.2457	52.1437	61.2629	46.0397	73.0996	62.9334
MLT1A-int	5.33921	7.34062	6.49212	3.32562	7.14726	7.19509	7.80414	5.33499	6.79167	3.49589	7.75067	4.90156
MLT1A0	57.2027	83.776	83.2983	84.1533	143.635	189.33	176.307	130.266	134.073	120.609	165.836	147.342
MLT1A0-int	2.27265	3.46392	3.53022	3.56066	6.92969	10.4661	8.85089	5.69448	9.05556	6.09691	11.6583	7.76241
MLT1A1	26.51	36.0763	31.5628	30.2805	49.3928	53.8031	49.3293	36.1609	45.9443	36.713	54.9637	43.3619
MLT1A1-int	2.7537	5.105	4.92263	4.01322	7.88911	7.92768	9.54079	8.318	7.84464	7.1663	10.2267	9.55011
MLT1B	49.198	72.6402	64.361	75.8099	119.761	163.366	147.237	104.118	131.637	103.725	154.788	138.951
MLT1B-int	8.67263	12.7235	11.0342	7.54939	13.0762	13.8407	13.1585	9.96247	13.3201	8.33198	10.7688	10.2644
MLT1C	35.8768	37.5884	35.3576	40.0772	58.5808	75.8347	67.3047	43.4731	64.9694	46.8027	65.5041	58.7796
MLT1C-int	0	0.404343	0	0.878094	0.702891	0.811083	0.911318	0.401558	0.789729	0	0.425683	0.816101
MLT1C2	57.2009	70.3379	67.4531	79.8802	123.114	206.116	147.164	110.37	148.864	100.767	134.989	146.403
MLT1C2-int	1.41071	2.47616	2.05366	2.41083	4.19004	10.858	6.51265	3.84349	5.84294	4.00578	3.97921	7.21694
MLT1D	51.3443	73.6499	77.5571	82.8789	140.054	189.543	183.668	128.023	165.08	127.373	153.452	165.866
MLT1D-int	1.98035	3.4085	3.47285	3.11299	7.57466	9.13123	12.9676	9.1976	14.4773	13.8582	13.9906	11.785
MLT1E	1.05632	2.5493	1.86065	3.37109	4.49014	7.44627	7.18913	5.10553	6.87591	4.46256	7.63221	7.08937
MLT1E-int	0	0	0	0	0	0	0	0	0	0	0	0
MLT1E1	5.00188	6.86771	6.45928	5.92925	8.90255	10.3866	8.09561	7.47664	5.10586	6.44598	10.226	8.5056
MLT1E1-int	0	0	0	0	0	0	0	0	0	0	0	0
MLT1E1A	5.90503	9.01697	9.34982	9.24634	15.5399	25.5156	19.4744	15.2665	17.8689	13.259	23.0116	20.429
MLT1E1A-int	5.57569	3.43432	3.36289	1.79662	3.79806	2.38092	2.96055	3.43581	4.44881	2.46721	3.45163	2.5262
MLT1E2	18.3631	23.9079	23.957	24.8764	36.7489	48.4159	42.1671	28.2789	33.2876	25.5994	36.6873	35.0027
MLT1E2-int	4.07267	4.46671	4.88764	2.21902	5.45315	6.67181	6.2457	4.5617	4.07816	3.76654	3.67639	3.8606
MLT1E3	4.16291	6.38458	5.49181	9.32099	11.4586	16.0992	12.9728	10.0902	11.0204	9.13264	13.2793	12.2226
MLT1E3-int	4.60244	4.06282	3.94082	2.8532	3.62002	4.17682	2.8179	1.90186	1.67738	1.73922	2.29227	1.70242
MLT1F	29.637	40.0256	41.3156	43.2261	61.4293	73.5077	76.6058	51.8068	66.8321	50.5843	61.995	65.1374
MLT1F-int	7.93756	8.96367	8.94017	5.31585	10.9669	9.34054	10.3081	8.20327	7.10756	8.57699	9.69747	8.93838
MLT1F1	10.76	14.9828	13.968	14.8622	24.2913	33.9614	30.15	21.6073	25.6746	19.4185	29.0839	27.0759
MLT1F1-int	2.34347	2.66039	2.36065	2.26153	4.6433	6.51483	6.85533	3.30808	5.6334	4.69851	5.23195	4.21754
MLT1F2	23.0076	39.8003	37.3692	42.3055	62.5762	78.0095	64.5703	51.723	57.388	45.6327	70.4182	62.855
MLT1F2-int	10.1207	12.1915	12.2669	6.56453	11.4117	10.3871	8.61351	6.73739	6.9454	5.81896	7.34649	7.05769
MLT1G	7.49002	12.2774	12.3656	14.9133	25.7156	28.1786	28.2467	31.0535	24.3236	26.7811	33.1621	31.4715
MLT1G-int	1.51361	2.09154	2.21305	2.80271	4.29762	5.25896	3.59571	3.61403	2.15859	2.02124	2.75722	3.41722
MLT1G1	9.86099	16.3001	13.9742	18.1008	25.7551	34.8384	38.018	30.3685	34.0636	34.5421	51.8662	37.4227
MLT1G1-int	3.59911	7.5645	5.65364	12.2147	12.4474	14.3117	7.57653	8.39448	9.2135	8.02778	11.2406	6.97459
MLT1G3	7.00178	10.3435	11.2886	13.6309	21.8879	35.6615	25.7891	17.7068	26.0084	17.0303	23.0309	24.8923
MLT1G3-int	2.41089	3.01016	1.72467	1.52703	4.42662	7.14276	3.63451	3.57578	3.42216	2.24148	5.61539	2.78046
MLT1H	24.8051	37.9217	36.3385	45.1191	66.5338	98.8491	77.0804	57.6611	80.3818	50.199	72.5356	75.9534
MLT1H-int	2.63648	4.02689	3.79748	4.13231	6.75442	5.5206	6.5727	4.83782	3.21156	5.38484	5.87961	6.11745
MLT1H1	9.10611	12.6438	12.5691	16.86	24.8902	36.6479	29.3637	21.2864	39.3338	20.7207	36.9495	30.8569
MLT1H1-int	1.08589	1.49316	1.82771	1.38546	2.67743	5.04441	2.49061	3.60064	2.86829	2.04162	3.09308	2.9459
MLT1H2	6.16513	11.5717	10.7665	13.9655	20.6896	28.4528	26.7513	20.7808	22.5304	19.8743	31.3382	26.2705
MLT1H2-int	0.497365	0.907025	0.903977	0.789055	2.0951	4.2124	2.87708	2.23725	1.10562	1.62283	2.12791	2.31088
MLT1I	18.7397	32.4012	30.3933	36.4091	59.9575	79.4307	67.8639	51.6833	56.5899	45.5864	69.4177	63.4532
MLT1I-int	1.52799	1.61111	1.34186	1.80973	4.07993	4.36938	3.91839	3.19335	7.87096	2.502	5.07799	3.64458
MLT1J	61.4488	86.3035	79.2134	80.7106	146.816	162.816	152.939	125.189	113.317	124.936	144.652	145.61
MLT1J-int	4.91638	6.06591	4.39075	6.52789	8.64633	9.2699	8.64697	6.4823	6.05459	7.62331	9.82532	8.37201
MLT1J1	10.0683	17.357	15.8277	21.9075	30.968	29.862	36.1277	30.414	28.0606	23.9195	35.4744	31.4253
MLT1J1-int	3.07959	6.15941	6.30179	10.6594	15.3369	8.137	16.9609	11.3392	6.58107	8.38201	10.0296	11.0229
MLT1J2	21.5051	28.4331	25.1199	27.859	40.3139	44.7545	47.9617	40.1761	40.6784	38.8346	52.7865	47.4969
MLT1J2-int	1.70099	3.05129	2.92642	4.30556	6.03631	6.09621	7.91535	3.35894	7.39713	4.05128	5.83535	6.78214
MLT1K	36.9591	56.5579	53.2581	59.7771	102.196	166.32	122.513	91.3117	106.249	83.3734	120.918	116.089
MLT1K-int	0	0.499072	0.469631	1.15658	1.28112	1.17738	1.13925	0.975213	1.10562	0.709816	2.02958	0.929843
MLT1L	34.3977	47.6327	42.9148	43.9138	77.618	98.7072	96.2659	64.8417	74.3535	69.6068	95.5482	83.8664
MLT1L-int	0	0	0	0	0.497826	0.497115	0.437628	0.898726	0.789729	0.508771	0.681402	0.459605
MLT1M	3.43737	6.58041	5.37994	6.76163	11.247	20.8181	12.027	9.1976	12.6883	7.90088	12.7643	10.0259
MLT1M-int	0	0	0	0	0	0	0	0	0	0	0	0
MLT1N2	10.0498	15.6781	13.893	14.2404	25.595	36.6557	31.7896	21.9132	24.271	20.578	30.505	26.109
MLT1N2-int	0	0	0	0	0.411002	0.915739	0.596225	0	0	0	0.528094	0
MLT1O	10.1971	14.7734	12.8677	13.8943	24.4593	38.8101	28.2122	21.4604	20.9015	21.1934	32.2105	26.0686
MLT1O-int	0	0	0	0	0	0	0	0	0	0	0	0
MLT2A1	5.2361	7.0592	6.77593	7.51391	11.5191	16.4195	14.6075	11.3362	9.73999	10.9622	12.5729	11.9113
MLT2A2	12.0717	16.3281	14.395	20.2058	23.8624	30.1571	28.993	27.8261	23.6561	21.7457	29.4567	29.1331
MLT2B1	7.35814	11.9131	9.78876	9.50529	18.948	22.1086	21.2491	16.7695	14.4068	16.2918	21.4138	18.2177
MLT2B2	4.90989	6.01656	4.91865	7.8064	11.3135	12.2269	11.5796	8.84729	14.0572	7.8907	14.7564	10.9261
MLT2B3	23.4282	37.0123	34.0317	33.7167	47.2378	58.5272	49.9828	47.7629	55.162	44.6434	52.2677	49.7234
MLT2B4	20.4828	33.866	31.5034	31.8579	46.9723	60.331	68.3122	33.4483	43.2361	30.4075	42.814	46.9807
MLT2B5	0	1.04111	0.82784	1.67705	1.80908	1.72682	1.814	2.31374	2.05329	1.46723	2.31966	2.22757
MLT2C1	3.76295	5.49473	4.78313	5.59448	9.92453	11.6639	12.6717	10.0516	10.0559	11.4762	12.1036	13.7227
MLT2C2	1.9392	2.70432	2.90319	2.39669	4.92539	6.67181	7.54805	4.60836	6.58107	5.35244	5.90042	5.77573
MLT2D	10.5962	14.3	14.2945	15.1013	23.3357	25.1174	28.3977	23.3749	24.7427	23.0525	30.8654	26.9581
MLT2E	1.85613	1.78115	1.57008	3.19251	5.81294	9.33007	5.07819	3.49165	5.6334	4.36235	4.96309	4.92899
MLT2F	7.5673	9.84704	9.69699	9.13339	16.3802	15.9025	19.6551	19.6377	15.784	16.9636	21.4621	19.541
MST-int	0	0.412697	0.42814	0.820848	1.05137	3.83564	1.89423	1.28078	0.789729	0.711012	2.27096	2.12264
MSTA	39.6089	63.3951	64.1369	82.6425	116.034	156.596	151.745	90.5293	167.695	90.2035	141.42	123.695
MSTA-int	71.1156	107.296	99.5391	70.1039	149.57	124.163	191.548	173.043	173.274	182.073	245.936	225.475
MSTA1	2.47727	8.46046	6.51365	7.6717	9.31922	5.9905	9.9932	7.20893	5.73975	6.58286	7.39201	7.56785
MSTA1-int	0	0	0	0	0	0	0	0	0.684432	0	0.803714	0
MSTB	21.1949	31.3857	32.7296	39.7849	58.4669	82.8351	71.5004	45.4044	76.6763	43.2684	64.9113	58.4075
MSTB-int	7.38624	11.6928	11.857	12.2745	18.9812	21.2713	22.5559	30.6141	21.1121	21.2535	20.0232	20.1931
MSTB1	11.2333	17.4734	16.1713	18.9347	29.0416	41.5463	37.2767	26.1204	38.3798	20.8352	32.5539	29.3758
MSTB1-int	1.7935	2.23792	2.02891	1.80633	3.7045	4.26473	5.85401	8.24189	3.31686	4.65772	3.44998	5.84809
MSTB2	4.18618	9.13443	6.28292	8.8596	11.6007	20.3294	14.6613	9.90511	12.5304	9.52057	16.9815	11.9969
MSTB2-int	0	0	0	0	0.531913	1.43902	1.5264	0.707508	0.895026	0.571223	1.51621	0.795293
MSTC	11.0075	17.3185	14.3049	18.0886	25.8077	32.8358	27.1011	23.7684	29.4306	20.612	30.438	27.4825
MSTC-int	1.6174	2.42918	2.59641	3.33949	4.84771	6.20086	7.1409	5.44972	4.15924	3.51534	2.52294	5.34412
MSTD	22.4965	37.186	31.0418	40.6992	58.292	64.1546	68.9526	47.8333	53.333	51.1742	63.5876	58.863
MSTD-int	13.8327	20.6804	18.5991	16.3195	24.5281	17.1374	17.9027	17.0758	10.2665	11.8314	13.7106	13.7591
MamGyp-int	6.1322	7.58573	6.52926	9.46364	12.5429	12.5325	9.64336	16.0428	6.68637	11.0761	7.7802	13.7851
MamGypLTR1a	1.22943	1.87533	1.65148	1.93785	3.12152	3.95024	4.73734	3.98117	4.58043	2.9937	3.90238	4.48305
MamGypLTR1b	2.14344	3.21874	2.86541	4.01471	5.52903	7.17782	5.75875	4.85312	4.36983	3.58462	5.10218	4.56162
MamGypLTR1c	0.661549	1.46805	1.17143	1.76397	3.07162	4.78801	3.90761	3.767	4.68572	3.16162	5.08929	4.16565
MamGypLTR1d	2.63496	2.75867	2.39025	2.45253	4.58237	5.83457	5.38059	6.82649	4.15924	4.27178	5.91785	5.83628
MamGypLTR2b	1.20117	2.30498	1.73487	2.2652	4.05453	2.17161	3.54837	3.84349	3.21156	3.26681	4.36403	3.86664
MamGypLTR2c	0.760124	1.96573	1.39758	1.61995	3.61714	3.5583	4.37912	3.00213	3.84335	2.30281	4.24166	3.64405
MamGypLTR3	1.6095	2.03673	2.05562	2.3144	3.48442	5.41594	5.26608	3.30808	4.68572	2.65753	5.551	3.89386
MamGypLTR3a	2.17424	4.59741	3.43996	4.17746	5.64516	7.12497	6.37004	5.4872	4.58043	4.92691	6.4248	6.43196
MamGypLTR4	0.696139	1.53926	0.877304	0.94132	2.18816	1.70066	2.32845	1.47238	2.68508	2.57508	1.87438	2.07542
MamGypsy2-I	2.13109	3.51316	3.05715	3.40032	6.06387	7.09044	7.06003	5.79392	6.15988	6.40414	10.2381	7.34591
MamGypsy2-LTR	0.40249	0.647883	0.79198	0.940741	1.78519	0.863411	1.75824	1.47238	1.52681	1.48499	1.71763	1.50305
MamRTE1	22.1913	31.5899	30.7984	30.9674	55.5096	59.2771	57.5389	44.5596	56.2971	44.6034	65.2491	52.0745
MamRTE2	0.401487	0	0	0	0	0	0	0.669264	0.579134	0.945071	0.783728	0.636602
MamRep1151	2.57694	3.21534	2.96975	1.95111	4.00413	3.89843	5.86409	3.53754	3.73805	3.12917	5.32367	3.46058
MamRep137	7.9797	13.7403	11.4673	12.3729	22.0596	24.5931	21.6656	15.1441	12.9494	14.6174	19.2135	18.5612
MamRep1527	1.41681	2.18954	1.97907	2.36065	3.89892	5.25896	5.81658	5.52621	3.63275	3.68036	6.06051	4.426
MamRep1879	2.37493	3.82677	3.25504	4.20096	5.9595	10.1255	8.14856	5.98513	7.52875	5.08361	7.30145	6.59715
MamRep1894	1.00964	1.95786	1.7245	0.984578	2.48315	2.01463	1.82784	1.39589	1.52681	0.958047	2.26621	1.99556
MamRep38	5.45034	7.53229	7.7884	10.0369	14.0411	23.1567	17.9643	13.1413	23.8646	13.5484	20.082	16.4417
MamRep4096	1.20796	2.07279	1.66099	2.34965	3.48885	3.53214	4.92962	2.46672	3.21156	2.32341	4.53825	3.21759
MamRep434	7.4583	13.6656	9.70546	6.18553	15.3911	16.6403	17.3309	15.3931	10.6877	13.8834	21.4606	14.249
MamRep488	0.797357	1.66889	1.67151	1.89716	3.13909	3.06118	4.35494	3.38456	3.00097	2.10601	2.16757	3.03729
MamRep605	15.342	18.9392	16.7785	13.0333	25.5483	28.6757	26.494	20.5177	24.3763	20.2127	27.3666	22.5302
MamRep605b	6.26428	9.56255	9.26576	7.48988	17.2655	16.4571	17.3379	17.2796	9.00291	13.8867	14.1753	15.354
MamSINE1	13.3362	20.3899	19.2811	19.3019	33.2113	35.6275	39.3491	38.3833	31.168	32.7133	42.6329	37.8805
MamTip1	0.834664	1.21557	0.950959	1.00988	2.66198	3.21817	3.75714	2.39023	4.89632	2.63267	4.20511	3.7245
MamTip1b	1.58507	0.896963	0.549984	0.480043	2.0206	3.06118	3.2082	2.5432	3.00097	1.84036	2.43331	2.1189
MamTip2	12.2319	16.8327	14.5227	12.9355	25.1081	24.0452	26.0588	24.3803	15.9525	23.9078	24.3025	23.6658
MamTip2b	29.5639	41.1103	36.6477	24.4029	45.0663	37.9174	44.7287	37.6616	37.3805	36.6941	49.6085	39.5286
MamTip3	1.11575	1.65576	1.30821	2.10544	3.06499	5.04965	4.50043	3.04037	6.26518	2.63145	3.92343	4.64335
MamTip3B	0.485505	0.966862	0.900757	1.37409	2.54893	1.9623	2.73087	2.00779	1.7374	2.08519	2.56635	2.26174
Mam_R4	0.802129	1.47357	1.4681	1.75661	3.12384	3.21817	3.4001	2.61969	2.47448	2.3809	4.38542	2.86603
Merlin1_HS	0	0	0	0	0.50361	0.863411	0	0.439802	0	0	0	0
ORSL	3.20305	3.46585	2.98062	2.42363	5.01805	5.10197	7.97929	4.95255	5.4228	5.36616	8.57399	6.13624
ORSL-2a	0	0.950544	0.833723	1.6145	3.63275	1.85764	2.76209	2.96312	3.10627	5.42221	5.21745	4.60696
ORSL-2b	1.18587	1.62033	1.2425	1.38436	2.88099	4.89266	4.31816	2.84915	2.79038	2.93915	3.95548	3.78085
OldhAT1	7.25867	11.422	9.10558	10.7376	18.1125	18.9239	18.8214	18.1577	15.0364	15.6756	19.3342	18.1064
PABL_A	1.45172	1.92677	1.47686	1.82685	3.47366	4.2124	4.55096	3.42281	2.03224	2.48695	2.70084	3.53438
PABL_A-int	2.74401	3.44669	3.76255	3.50757	6.11456	6.20086	4.79919	5.40192	3.12733	3.16275	5.55385	3.76017
PABL_B	5.18774	6.22828	5.98405	4.17442	8.83514	16.5304	8.86805	7.24717	3.73805	7.07237	5.76714	6.44119
PABL_B-int	3.01557	3.83225	2.52202	2.80872	3.86559	8.32014	5.91074	3.3272	2.44816	3.35358	4.21696	3.54157
PRIMA4-int	2.39104	5.08196	5.08106	4.4201	8.31732	13.4917	8.91258	7.44757	5.94929	5.49908	7.88503	8.55694
PRIMA41-int	2.31267	3.05806	3.2354	3.40346	7.07667	9.01087	7.72918	4.81908	4.94897	3.04812	4.50972	4.95094
PRIMA4_LTR	0.531428	0.959091	0.950135	1.04771	1.81925	3.32282	2.68446	1.81657	2.05329	1.09861	2.11231	2.07467
PRIMAX-int	0	0	0	0	0	0.601771	0.484374	0	0	0	0	0
Penelope1_Vert	1.97744	2.74759	2.42964	1.55518	3.41438	5.12814	3.91267	2.76005	3.10627	2.53153	4.39625	3.38639
Plat_L3	8.07109	14.4707	13.4889	12.0315	27.1386	26.0091	29.4438	20.9174	25.305	20.6981	24.7592	21.9925
PrimLTR79	0.460448	0.697255	0.591489	0.597618	0.783006	1.07272	1.00284	0.822239	0.579134	0.999763	1.08307	0.702641
Ricksha	1.88519	4.51763	3.14242	3.39052	5.97494	5.36361	4.56696	3.03961	3.5622	2.47687	4.75775	3.95926
Ricksha_0	3.3767	6.44974	4.14782	3.89478	7.44558	6.42326	4.94618	4.80914	2.57978	6.51083	5.51543	4.73508
Ricksha_a	0	0	0	0	0	0.444788	0	0	0	0	0	0
Ricksha_b	3.19846	2.32677	2.34091	1.82996	4.221	5.04912	4.72433	1.51024	2.89462	2.25593	3.87118	3.36732
Ricksha_c	0.62397	1.74573	1.38956	1.5836	3.525	4.47404	4.77594	3.33332	4.43933	2.92107	5.71033	3.69826
SVA_A	9.09839	10.0956	10.5516	12.6754	13.5448	43.1753	21.4552	13.7949	23.536	12.2552	15.3938	18.2852
SVA_B	18.9276	17.784	21.0388	22.5975	25.2369	89.9329	36.2115	24.4564	35.7052	17.6537	26.3431	29.6632
SVA_C	11.7259	15.4845	16.1464	19.3953	22.1437	83.2077	44.5872	30.9881	57.3575	25.1316	31.7339	37.7068
SVA_D	50.9455	63.1478	64.5539	86.3154	85.1899	243.409	148.221	113.709	139.091	101.984	101.7	139.472
SVA_E	5.32836	9.7057	8.10037	13.9766	11.1203	37.562	20.3003	14.702	20.7509	13.4136	14.9542	19.063
SVA_F	8.8349	10.2308	11.0846	21.0647	16.5784	61.4152	28.9152	36.1429	31.5186	31.9846	24.8748	37.1628
THE1-int	0	0	0	0.441371	0.762646	1.48245	1.17331	1.35765	1.31516	0.839626	0.935488	1.3676
THE1A	5.00793	7.23178	8.76296	8.51452	14.1414	15.1045	18.7389	11.1782	15.286	11.4736	18.9428	12.8407
THE1A-int	34.1432	45.5775	39.7019	45.6014	71.6359	127.905	75.0124	56.1952	58.2335	50.7338	71.9345	64.5402
THE1B	43.3107	57.1057	57.3109	66.5534	103.916	139.433	139.121	88.2178	128.157	91.7958	134.997	117.182
THE1B-int	49.6174	71.9861	72.3864	84.1134	116.946	169.917	145.51	100.743	133.21	92.9145	160.878	124.575
THE1C	16.4962	25.2222	25.1129	30.0487	45.2349	58.9846	54.3492	35.1092	60.6807	34.4807	60.3081	46.2173
THE1C-int	68.1465	47.4097	57.4479	49.3532	50.4717	199.817	221.839	227.515	368.964	96.0219	156.752	130.232
THE1D	19.6189	30.3408	32.0388	39.6524	66.6689	85.0141	75.7237	44.8265	79.3709	48.3845	80.833	62.3053
THE1D-int	15.1459	35.733	27.5935	36.481	75.2727	70.2942	60.7817	52.7017	57.7681	60.2971	73.7602	63.9031
Tigger1	140.674	187.668	185.244	150.74	282.779	292.605	280.871	192.995	230.349	200.119	284.017	217.389
Tigger10	5.4225	7.8856	6.70668	5.70819	13.5682	15.8292	20.5613	17.5347	13.2148	14.2713	21.26	16.0795
Tigger11a	2.00136	3.20537	2.52507	1.37708	4.45721	4.16007	3.64387	4.45539	3.21156	4.10234	5.62445	4.40361
Tigger12	3.02875	2.87661	3.00317	3.00767	5.52515	6.29505	7.07894	5.14377	8.37113	6.47467	7.51884	6.25124
Tigger12A	1.44083	1.94654	1.786	2.07785	4.21929	4.16007	4.85507	3.88173	3.84335	3.95822	6.48713	3.92679
Tigger12c	1.37641	2.58375	2.29537	2.02186	4.92994	7.66604	6.63485	5.33499	5.6334	5.20272	4.58919	6.46554
Tigger13a	13.5397	19.8621	16.6852	19.7807	33.4656	29.2759	37.7437	28.5485	28.5166	33.2584	43.4339	38.8321
Tigger14a	2.33889	4.03095	3.6921	2.83005	6.59662	5.36361	7.84798	6.25284	5.00162	7.65867	8.7005	8.5718
Tigger15a	20.5609	30.2481	28.0639	19.3504	47.9672	44.8885	50.5241	42.2753	32.3125	42.7709	44.5918	43.9937
Tigger16a	5.7517	7.48453	6.39592	5.48425	12.2701	15.567	16.1546	10.4979	14.5837	10.0204	15.7479	11.2931
Tigger16b	2.11801	4.34659	3.71585	3.29056	7.47791	7.40388	8.6018	7.05596	5.52705	7.19203	9.7675	7.59175
Tigger17	2.59485	2.65436	2.5218	2.43807	3.49032	2.43325	3.67349	1.93131	3.00097	2.50919	2.98625	3.06308
Tigger17a	8.5841	10.4947	10.381	9.85587	22.071	27.4978	28.0102	19.3131	25.324	17.0081	25.9295	23.8835
Tigger17b	0	0	0	0	0	0	0	0	0.579134	0	0.465691	0.446434
Tigger17c	0.514471	0.799842	0.726673	0.828119	1.2132	2.48558	1.15972	1.41502	1.10562	0.935956	1.60788	1.538
Tigger17d	1.09496	1.83648	1.45807	1.41981	2.97935	2.95653	3.69218	3.42281	2.89567	2.30747	3.77735	3.5119
Tigger18a	4.12709	5.74492	5.33231	2.60545	9.40271	8.26782	9.35328	12.3336	9.00291	12.5493	10.4476	9.97332
Tigger19a	10.9519	18.3994	15.8174	16.3965	31.341	29.9661	30.9988	25.2794	22.1651	28.5509	33.8179	29.9244
Tigger19b	28.0183	31.7846	27.9109	22.8368	41.639	39.3349	41.1591	37.8375	28.326	42.163	51.5947	39.7894
Tigger1a_Art	1.5665	2.35783	1.83863	1.48797	2.69582	1.75299	2.97877	2.12252	2.47448	2.08634	3.46786	2.64358
Tigger1a_Mars	0	0	0	0	0	0	0	0	0.579134	0	0	0
Tigger2	31.5391	40.7035	41.1436	34.0913	66.6625	57.6392	66.2424	47.6516	47.7523	40.9881	56.6953	48.8381
Tigger20a	4.9602	6.30852	5.74805	4.10776	9.85767	10.7534	11.9679	11.454	13.3201	9.87577	12.502	8.40697
Tigger21a	0	0.484292	0.424174	0.443896	1.05815	0.758755	1.45723	0.592777	0.789729	0.502428	0.693678	0.737508
Tigger22N1	3.68892	4.79242	3.77939	3.05328	7.64621	5.93922	7.82774	7.47664	3.84335	6.00073	7.50996	6.99909
Tigger23a	1.01026	0.912106	1.05065	0.720545	2.00672	2.24487	2.5421	1.80893	3.21156	2.06427	3.3445	1.87375
Tigger2a	9.21992	13.0968	13.0281	13.8707	26.633	25.8756	29.1531	20.1257	26.7971	19.2288	25.3675	22.6165
Tigger2b_Pri	6.3268	12.3854	10.4547	8.846	19.7239	14.8878	17.6362	14.3219	8.58172	15.2725	18.61	15.5214
Tigger3	4.48178	7.35911	8.22023	9.1046	14.2195	13.2128	11.7929	6.55879	12.4777	6.4594	8.20244	9.85071
Tigger3a	16.1843	24.3209	25.0436	25.629	48.7941	62.243	53.0249	34.7822	49.5423	39.277	65.6101	53.8574
Tigger3b	22.0595	33.4528	34.2134	35.5441	66.4859	56.7052	68.6666	39.9337	53.6837	43.0659	68.3616	57.3452
Tigger3c	5.08917	7.85271	8.36156	9.42116	16.416	18.4074	16.7114	10.974	9.05556	10.5849	17.0399	14.5561
Tigger3d	0.481286	0.94503	0.729922	0.889594	1.8051	1.85764	1.95939	1.58711	1.63211	1.16416	2.60875	1.6506
Tigger4	7.98594	11.5753	10.7645	7.75558	18.3759	18.4043	16.8724	11.8364	10.1085	12.5961	18.354	13.2165
Tigger4a	12.4633	17.4768	15.5197	11.324	29.3002	31.7756	26.1363	20.46	14.232	21.5277	28.1715	22.6038
Tigger4b	13.969	18.7721	16.9407	13.1063	26.5015	21.7805	22.4957	16.9186	12.1429	18.0031	29.0236	19.2819
Tigger5	1.27726	1.95855	1.23271	1.8792	2.83036	1.77863	3.15797	2.42809	2.21124	2.0372	3.43414	2.44013
Tigger5b	3.66352	6.07203	5.90056	3.78504	8.74642	9.44519	8.03092	6.50142	6.26518	7.88369	11.0007	8.38129
Tigger6	0.638467	0.95485	0.691851	1.59204	1.62479	1.49135	2.25155	1.70184	2.05329	1.77653	2.3203	2.63139
Tigger6a	2.53114	4.73791	4.26657	4.17716	9.27238	9.6702	11.979	7.05557	8.26478	7.46294	12.6646	9.1132
Tigger6b	0.485534	0	0.533631	0	0.673801	0.706427	1.00444	0.439802	0.684432	0.88543	0.661813	0.621224
Tigger7	11.7684	14.2052	13.825	10.0561	18.7555	22.8924	19.5426	13.5	15.9525	12.8878	16.6687	15.4196
Tigger8	2.82957	3.64522	2.85973	3.0377	6.09197	5.93922	7.91682	4.36934	5.84399	5.59206	7.96572	5.8821
Tigger9a	2.48416	3.33052	2.71159	2.27133	5.39938	7.14276	7.29892	3.53754	5.7387	4.37244	7.37839	5.48244
Tigger9b	1.99321	5.23314	4.94593	3.88927	7.58038	9.0789	10.1815	6.78825	12.1618	6.77112	9.95298	7.34341
UCON100	0	0	0	0	0	0	0	0	0	0	0	0
UCON105	1.2808	1.7196	1.71083	1.53345	3.52781	2.74722	3.23801	3.07861	2.79038	3.25642	4.20748	3.52712
UCON11	0	0	0	0	0	0	0	0	0	0	0	0
UCON14	0	0	0	0	0.52703	0	0.542457	0.879604	0	0.790484	0.542929	0.4641
UCON2	0	1.14131	0.617137	0.432904	0.764148	0.468335	0.999202	0	1.12668	0	1.27175	0.499593
UCON21	0	0	0	0	0	0	0	0	0	0	0	0
UCON23	0	0	0	0	0	0.549443	0	0	0	0	0.531493	0
UCON29	0	0	0.446662	0.638379	0.852114	1.12505	1.42178	0	1.31621	0.797205	1.48916	0.859563
UCON33	0	0	0	0	0.692082	0.549443	0.601757	0.401558	0.473837	0.676374	0.611864	0.610645
UCON34	0.55103	0.994484	0.760856	0.766561	1.71817	1.54367	1.85869	1.01346	3.31686	1.17435	1.2902	1.57988
UCON37	0.501566	0.408733	0.432869	0	0.948139	0.863411	1.05753	1.28116	1.21092	0.83868	1.39019	1.33622
UCON38	2.20817	2.03365	1.85088	0.70464	1.83946	2.01463	1.84466	1.16643	1.10562	1.60589	2.45545	1.47297
UCON39	0	0	0	0	0	0	0	0	0	0	0	0
UCON40	0.551201	0.760246	0.466773	0.758353	1.0833	1.49135	2.10981	2.81091	0	2.09985	1.31543	2.59783
UCON44	2.0852	3.65342	2.55319	1.48301	3.37471	3.21817	3.96682	3.53754	3.52746	3.39946	6.81499	2.73943
UCON49	0	0	0	0	0.666705	0.444788	0.689426	0.439802	0.579134	0.509601	0.978415	0.596644
UCON51	0	0.486553	0.544405	0.512666	0.447459	0	0	0.401558	0	0	0	0
UCON55	0.935965	2.17277	1.88952	1.57	2.47298	2.59023	1.98272	1.47238	1.26357	1.45434	2.09654	1.57273
UCON58	0.73009	0.875002	0.854128	0.650795	0.941676	0.863411	1.00131	0.63102	0.684432	0.649335	0.80998	0.684405
UCON62	0	0	0	0	0	0	0	0	0	0	0	0
UCON69	0	0	0	0	0	0	0	0	0	0	0	0
UCON7	0	0	0	0	0	0	0	0	0.473837	0	0	0
UCON73	0.709577	0.783393	0.544211	0.460059	0.876646	0.758232	1.00483	0.707125	0	0.762151	1.36069	0.61678
UCON78	0	0	0	0	0	0.549443	0.493528	0.592777	0	0	0.404612	0.54743
UCON8	0.400168	0	0	0	0.751534	0.915739	0.963177	0	0.895026	0.542073	0.611719	0.513963
UCON80	0	0	0	0	0	0	0.428634	0.458924	0	0.66909	0.566944	0.566062
UCON81	0	0	0	0	0	0	0	0	0	0	0	0
UCON83	0	0	0	0	0	0	0	0	0	0	0	0
UCON86	0.742068	1.09223	1.04359	0	1.00642	0.497115	1.11399	0.439802	0.895026	0	0	0.584644
UCON89	0	0	0	0	0	0	0	0	0.579134	0	0	0
UCON97	0	0	0	0	0	0	0	0	0	0	0	0
UCON99	0	0	0	0	0	0	0	0	0	0	0	0
X10b_DNA	1.34984	1.1964	1.52069	0.752438	1.86184	2.01463	1.64059	1.64448	0.789729	1.93284	1.62799	1.34453
X11_DNA	0.833673	0.736004	0.865353	0.456391	1.52137	1.25587	1.62052	1.72096	1.31621	1.57129	1.58535	1.30298
X12_DNA	4.37996	6.71833	5.96085	3.9909	9.59834	11.8957	12.1937	13.4319	8.14895	13.0278	12.8391	11.476
X12_LINE	1.08427	1.43762	1.42731	1.03876	1.75816	1.64833	1.89139	1.6636	1.31621	1.27326	1.84802	1.43038
X13_LINE	0	0.479148	0.666526	0	0.668012	0.811083	0.945309	1.20468	0.473837	1.23396	1.69347	1.00134
X15_LINE	0.611473	0.713417	0.71285	0.821186	0.918995	1.75299	0.919895	1.19167	0.684432	0.925836	0.703256	0.72879
X17_LINE	0.830481	1.22164	0.858288	1.43495	2.40178	2.9042	3.06677	2.73442	3.21156	2.05438	2.97992	2.81981
X1_DNA	2.01767	1.64982	1.82032	1.31089	3.8652	6.8288	5.48995	3.69051	2.26284	3.73508	3.51007	3.4812
X1_LINE	0	0	0	0	0	0.968067	0.583653	0	0	0	0	0
X1_LR	0	0	0	0	0	0	0	0	0	0	0	0
X20_LINE	0	0	0	0	0	0.601771	1.05803	0.822239	1.42151	0.57888	0.68155	0.536029
X21_LINE	0	0	0	0	0	0.444788	0	0	0.684432	0	0	0
X22_DNA	0	0	0	0	0	0	0	0	0	0	0	0
X23_DNA	0	0	0	0	0	0	0	0	0	0	0	0
X24_DNA	0.76493	0.71162	0.440249	0.598949	1.08095	1.28203	1.16955	1.47238	0.473837	1.42284	2.39903	1.27078
X24_LINE	0.816335	0.637155	0.780776	0.997462	1.67503	2.69489	2.42869	0.975213	1.948	0.804684	1.87315	1.64954
X26_DNA	1.51409	2.53016	2.14102	2.15948	5.10385	4.66608	6.03582	7.64873	3.78017	7.33799	10.3963	7.39863
X2_LINE	0	0	0	0	0.574019	1.12505	0.783583	0.478046	0.789729	0.486025	0.620219	0.449996
X2a_DNA	0.568992	1.15283	1.17593	0.913217	2.25447	0.706427	1.74313	3.30808	0.895026	2.3529	1.85404	2.22055
X2b_DNA	0	0	0	0	0	0.444788	0	0.707508	0.579134	0	0	0
X30_DNA	1.07693	1.9572	1.98965	2.39091	4.81398	6.40965	4.40019	4.49363	3.00097	4.75629	4.47094	4.81338
X32_DNA	2.01288	2.72673	2.10536	1.2666	3.41848	3.79378	4.08832	3.1551	1.7374	2.50701	2.85062	2.81332
X33a_DNA	0	0	0	0	0	0.706427	0	0	0	0	0	0
X34_DNA	0	0	0	0	0	0	0	0	0	0	0.463865	0
X4a_DNA	0.584855	0.523575	0.452546	0	0.933552	1.09889	1.0364	0.554533	0.684432	0.978758	1.26013	0.822582
X4b_DNA	2.0703	1.75533	1.91909	1.09164	3.37792	3.74145	3.91945	2.42847	3.10627	2.43008	3.26335	3.48868
X5B_LINE	0	0	0	0	0	0	0	0	0	0	0	0
X5a_DNA	1.50377	2.27651	1.62111	1.01735	2.73275	2.22394	2.85767	2.2755	1.42151	1.98211	2.19414	2.07282
X6A_LINE	2.11642	2.98237	2.86206	2.83394	4.94308	4.39555	5.00006	3.5058	2.94832	4.03775	5.15964	3.57211
X6B_LINE	1.12936	2.3416	2.11605	1.358	4.34651	3.11351	5.62623	3.61403	1.52681	3.426	5.97426	3.15781
X6a_DNA	3.81068	4.86237	3.81016	3.44022	6.31102	5.65142	7.24589	5.26806	5.15956	6.99513	8.50766	6.7982
X6b_DNA	1.68886	2.9623	2.28703	1.95115	4.64743	4.21188	6.77429	5.10553	2.15859	4.87447	5.08454	4.24736
X7A_LINE	2.85543	3.96727	3.55378	2.53469	6.2234	6.0444	6.08626	3.65189	5.10586	4.28078	5.87533	4.80637
X7B_LINE	2.19271	1.93171	1.74678	1.81935	3.72729	5.18047	4.62389	2.94476	2.36919	2.90255	3.7902	3.22943
X7C_LINE	0.834853	1.36613	1.33584	1.39187	2.52641	6.51483	3.25251	1.54887	2.26389	2.07769	2.33727	2.68617
X7D_LINE	0	0	0	0	0	0	0	0	0	0	0	0
X8_LINE	0	0	0	0	0	0	0.550454	0	0.684432	0	0.790092	0.508202
X9_LINE	4.15765	1.89474	1.04378	0.867863	1.65723	2.41546	2.23733	2.44377	1.26357	1.38353	0.854995	1.40401
X9a_DNA	1.60048	1.72785	1.20646	1.36715	3.26348	3.06118	3.14015	3.11686	3.21156	2.36265	2.60643	2.64755
X9b_DNA	1.91218	2.87381	2.55221	2.07001	4.91871	4.52637	5.10417	4.14944	3.05362	3.43951	2.70271	3.53627
Zaphod	5.32472	6.04512	5.51977	3.98655	8.23727	6.92299	8.24039	5.71743	3.52746	5.6531	7.88096	7.79862
Zaphod2	2.96704	5.63899	4.64531	2.00229	6.86565	4.31706	6.15071	3.23886	3.10627	4.65567	6.42833	5.08969
Zaphod3	1.99456	3.79835	3.58072	2.71641	6.91177	5.78224	6.02836	3.95822	3.31686	4.77002	4.85601	4.72091
Zaphod4a	0	0.57993	0	0	0.880818	0.706427	1.2888	0.860482	0.895026	0.433232	0.537114	1.10632
Zaphod5a	0	0	0	0	0	0	0	0	0	0	0	0
Zaphod5b	0	0	0	0	0	0	0	0	0	0	0	0
hAT-16_Crp	0	0	0	0	0	0	0	0	0	0	0	0
hAT-1_Mam	2.56713	5.10423	4.14851	4.45777	9.44084	12.0197	11.9131	9.31233	9.63469	7.77481	13.8615	10.2519
hAT-4b_Ther	0	0.496971	0.516465	0.884103	1.19428	0.968067	1.47333	0.669264	0.789729	0.715569	1.2838	0.868576
hAT-5_Mam	1.20009	2.59838	1.72931	1.58716	4.34704	4.94499	6.7014	3.88173	2.57978	3.83138	5.54991	3.79801
hAT-N1_Mam	0	0	0	0	0	0	0.639684	0.478046	1.00032	0.48098	0.672379	0.588879
hAT-N1a_Mam	0	0.46076	0.511862	0.526447	1.20606	2.48558	1.95892	0.975213	1.948	1.16201	2.09914	1.81199

## Sheet: cpm_Inferior_temporal_cortex.
TE.subfam	mean.2A	mean.2B	mean.3A	mean.3B	mean.4	mean.5	mean.6	mean.7	mean.8	mean.9	mean.10	mean.11
Alu	7.06788	9.57818	6.6068		14.6532	11.7845	18.5478	11.5643	20.8937	10.6745	15.7679	11.826
AluJb	636.396	1049.17	798.55		1402.56	1397.23	1399.17	993.11	1663.91	761.578	1329.57	1087.2
AluJo	208.55	370.082	284.491		509.259	503.631	526.837	363.059	562.1	279.845	462.917	392.802
AluJr	555.864	911.576	709.196		1333.92	1225.15	1359.22	939.638	1520.68	741.769	1247.48	1024.33
AluJr4	55.5756	100.317	77.8587		125.937	106.956	116.883	83.1266	135.995	70.5642	107.867	85.6608
AluSc	180.122	349.803	244.68		392.874	555.292	469.122	306.98	535.492	266.954	409.906	339.716
AluSc5	17.1232	35.1569	24.0641		39.1697	56.6218	50.1993	33.1031	51.1944	21.6482	41.0905	37.2272
AluSc8	101.348	207.962	138.913		216.025	335.59	258.941	163.728	294.194	137.223	207.083	176.479
AluSg	230.687	475.441	320.468		509.636	783.198	607.001	400.741	654.264	315.252	498.284	429.873
AluSg4	52.6887	103.801	72.7255		116.528	169.526	151.588	97.0506	150.153	73.0983	116.465	98.7919
AluSg7	26.6156	53.2525	34.5603		59.9912	97.0591	95.5901	53.7996	88.0554	46.5418	67.1164	60.2317
AluSp	352.056	700.267	468.367		761.225	1147.78	936.201	603.488	992.725	483.966	771.219	639.237
AluSq	62.8661	121.109	86.968		147.71	217.142	163.789	103.365	179.35	88.3003	132.13	113.135
AluSq10	12.9475	18.3923	13.7752		17.538	24.2598	16.5579	9.89517	16.5618	7.38294	11.4099	9.67604
AluSq2	259.192	507.813	349.333		582.675	815.535	673.656	450.121	713.231	360.4	556.6	471.164
AluSq4	4.37113	10.0089	6.78261		12.5788	20.811	15.663	8.97388	18.9023	7.90177	13.4234	11.1237
AluSx	754.629	1218.74	928.264		1385.1	2043.03	1723.68	1097.19	2014.82	880.409	1435.43	1221.14
AluSx1	612.475	1233.28	867.583		1287.88	1816.93	1432.74	889.494	1560.25	733.471	1140.67	958.629
AluSx3	139.008	288.073	198.32		351.323	469.616	408.697	267.521	467.75	218.129	347.81	290.104
AluSx4	57.5866	105.295	78.2094		121.364	166.097	138.176	93.1389	159.288	77.5939	122.785	103.674
AluSz	542.208	1093.06	750.879		1309.94	1804.71	1504.83	983.286	1712.46	791.366	1300.54	1109.16
AluSz6	200.464	371.289	264.237		466.727	565.35	518.594	328.927	572.587	280.689	456.458	371.447
AluY	381.739	747.613	526.688		844.648	1311.62	1101.8	736.405	1363.65	574.354	868.04	699.851
AluYa5	7.75676	17.7008	13.4467		17.4742	24.6703	25.293	18.514	37.4823	12.125	19.0033	14.5219
AluYa8	0.453109	0.604428	0.649467		1.90895	1.37173	1.17556	0.699502	1.04696	0.548845	1.25228	0.777534
AluYb8	5.67204	8.317	6.69167		11.4242	15.1387	17.0956	11.6046	17.8571	7.67643	11.7039	8.84047
AluYb9	0.572038	0.967527	0.736784		1.13133	2.30846	1.89067	1.21359	2.57763	0.751776	1.46121	1.30766
AluYc	15.9983	32.2783	20.2148		37.0684	54.4009	50.9363	39.0896	67.5422	27.7048	48.9591	34.3857
AluYc3	1.94041	4.41072	3.31263		4.88426	8.61931	6.90707	5.64335	9.54225	4.15281	6.19216	4.19073
AluYd8	0	0.679028	0		0.559861	1.43268	1.65123	1.10499	3.04945	0	0.848386	0.777808
AluYe5	2.34761	6.11867	3.70217		6.46333	12.2191	10.0936	6.88427	13.376	4.8728	7.99334	6.28434
AluYe6	0	0.930643	0.582724		1.35627	1.7582	1.71884	1.54214	2.61186	0.665017	1.38651	0.975465
AluYf1	8.5517	16.046	12.9648		18.4929	26.3535	21.7833	12.8973	28.6707	11.9935	16.7143	14.23
AluYg6	4.98351	6.74196	5.7642		7.16157	6.88558	6.17815	5.41173	6.2747	3.80722	2.93366	3.4563
AluYh3	1.25118	2.78648	2.04326		3.72764	5.56113	4.6933	3.18929	5.4899	2.85452	3.89622	3.0431
AluYh3a3	0	0.729869	0.587156		1.3307	1.24193	1.3797	1.04367	2.0762	0.932354	1.21866	0.982063
AluYh7	0.967769	1.72681	1.06792		2.30782	3.9887	2.93629	1.60767	3.66663	0.960718	2.00011	1.71104
AluYh9	0	0	0		0	0	0	0	0.458753	0	0	0
AluYi6	1.98735	2.93788	2.26839		2.73022	2.94539	2.54945	2.27314	3.70364	1.92773	2.18373	1.90413
AluYi6_4d	0	0	0		0	0	0	0	0	0	0	0
AluYj4	10.7853	21.8827	15.5824		23.8018	35.7349	26.5854	18.2302	34.6306	14.624	22.251	16.8761
AluYk11	0	0.630002	0.548756		0.726129	1.28713	0.921176	0.84803	0.830595	0.89737	0.99339	0.864998
AluYk12	0	0	0		0	0	0	0	0.456223	0	0	0
AluYk2	26.8757	52.0727	38.7437		59.3143	84.1173	76.2731	53.0864	97.8158	43.607	63.981	54.8776
AluYk3	25.3241	46.0495	34.2078		58.6731	89.1845	63.9391	42.6529	78.7197	34.0022	49.7428	38.8779
AluYk4	5.0148	8.56933	7.70404		8.92562	12.6839	11.0398	6.4952	14.3942	5.08943	8.31266	6.96237
AluYm1	18.2423	34.5761	24.6756		39.4954	63.1458	52.2599	35.583	61.3086	32.5824	42.7094	33.2925
AmnSINE1	5.69047	10.7646	7.06785		11.1416	10.1967	12.9697	10.5075	12.1803	7.98139	11.8899	11.1761
AmnSINE2	1.8952	3.87827	2.70166		4.06891	3.08928	4.01229	2.77402	4.04527	2.90588	3.62336	3.20511
Arthur1	2.83411	4.65446	3.38357		6.62029	6.4481	10.4056	9.86318	11.1735	13.0315	10.6304	9.48249
Arthur1A	1.7561	2.74757	2.57644		3.90208	2.59168	5.0668	3.68278	6.23263	2.74175	3.56293	2.85236
Arthur1B	4.91013	6.16389	5.38677		10.0264	6.81592	13.5222	11.9937	14.618	11.4374	11.5663	10.4573
Arthur1C	1.51268	1.11334	1.72628		4.0636	3.21369	3.1528	2.5396	2.77687	0.864864	2.83799	2.08492
Arthur2	2.64459	3.53869	2.59277		4.94711	2.76418	4.83847	4.21725	5.64665	3.68848	4.49496	3.5962
BLACKJACK	3.04275	4.40546	2.77041		6.61461	5.24556	7.74608	6.71852	7.06601	9.19454	8.81165	6.3802
CR1-11_Crp	0	0	0		0	0	0	0	0	0	0	0
CR1-12_AMi	1.44313	2.13013	1.52676		1.65032	1.67941	2.33081	1.69351	3.44763	3.32212	1.98165	1.4753
CR1-13_AMi	0	0	0		0	0	0	0	0	0	0	0
CR1-16_AMi	0	0.708196	0.404641		0.922795	0.559803	1.53478	1.32734	3.05778	0.721974	1.47726	0.8378
CR1-1_Amn	0	0	0		0	0	0	0	0	0	0	0
CR1-3_Croc	1.47791	2.7498	1.99837		3.75876	3.77349	4.79265	6.00613	7.75075	5.74214	6.03016	5.42701
CR1-8_Crp	0	0	0		0	0	0	0	0	0	0	0
CR1-L3A_Croc	0.92152	1.60657	1.38355		2.69779	1.38914	2.16081	1.82694	3.57835	1.04219	2.18787	1.82006
CR1-L3B_Croc	0	0	0		0	0	0	0	0	0	0	0
CR1_Mam	7.80684	5.45682	3.82877		8.37025	8.52145	10.5276	8.12539	15.5144	9.37581	10.9502	8.55712
CRP1	0	0	0		0	0	0	0	0	0	0	0
Chap1_Mam	0.851971	1.56744	1.14103		2.18193	2.71608	2.49833	3.04076	2.99019	2.29368	3.22825	3.31422
Chap1a_Mam	3.40754	5.88918	4.21578		7.65848	5.7639	8.35487	5.87343	12.9372	8.65995	9.93564	7.18138
Charlie1	22.9858	28.4152	20.1604		25.8591	16.8488	26.9539	22.7212	27.4015	30.663	33.2195	27.655
Charlie10	8.29368	11.1611	9.86641		15.8007	6.68322	12.8552	12.1432	10.5957	20.5699	13.6487	11.3382
Charlie10a	0.973681	1.01012	0.763201		1.69778	1.14034	1.41902	0.945858	2.30608	0.822786	1.85697	1.23144
Charlie10b	0.539002	0.925852	0.682625		1.18889	1.38914	1.33817	1.11826	1.57153	0.431692	1.79334	1.0582
Charlie11	0	0	0		0.459663	0.435403	0.596942	0.567872	0	0.788364	0.75325	0.460265
Charlie12	4.81624	4.93368	4.40127		4.62742	3.66982	7.29197	6.17919	2.84149	5.48	3.82034	2.92082
Charlie13a	1.92997	3.42684	2.57366		5.41159	3.62835	4.53757	3.02838	4.73572	4.1179	4.93093	3.87626
Charlie13b	0.92152	1.32744	0.743123		2.216	1.55501	1.71843	1.30849	2.17017	2.09502	2.60639	1.69511
Charlie14a	0.539002	0.87648	0		0.997418	0.518336	1.52144	1.48046	2.26938	1.10317	1.29793	0.972337
Charlie15a	17.4355	29.4709	21.9177		30.9311	30.5914	35.7143	37.452	40.9202	44.6128	36.9741	38.0468
Charlie15b	9.99762	11.1895	8.17858		18.4538	23.4081	32.6287	21.6233	25.4817	23.8325	29.6151	30.6086
Charlie16	4.95534	8.27225	5.49833		8.07808	5.84683	9.11764	7.89723	9.09977	9.884	8.2449	6.96889
Charlie16a	4.06477	6.31532	4.97772		7.39517	7.56854	13.3194	11.2182	11.7908	13.4757	13.7511	11.9734
Charlie17	6.76361	9.90359	8.22689		8.73934	3.96009	5.29229	5.10465	6.45854	5.41402	4.1213	4.35122
Charlie17a	2.45159	4.19895	2.83703		6.80248	6.57251	8.18302	8.25748	12.9919	6.84654	11.5105	9.5895
Charlie17b	3.56437	5.45155	3.74665		5.3316	4.12596	4.47199	4.45842	4.33588	4.30013	5.78942	6.17868
Charlie18a	12.0072	17.3334	12.7129		18.1565	12.9995	22.0582	20.4241	24.7856	18.7294	20.5285	17.4187
Charlie19a	5.2544	10.084	6.64133		9.85889	10.2714	14.571	11.6486	14.4476	7.86765	11.3431	10.6906
Charlie1a	26.0456	40.2643	26.6505		50.0887	34.59	61.1417	44.0393	55.2519	60.9915	58.1841	47.7747
Charlie1b	8.36357	12.9847	8.91363		14.4356	11.2856	15.6794	11.5485	18.7115	11.3291	14.2898	11.9157
Charlie20a	5.09444	5.53757	4.33832		5.96329	3.87716	5.2723	6.59167	9.03411	6.01218	7.33862	6.15228
Charlie21a	1.44313	2.51293	1.87303		4.42016	2.25995	4.29684	4.06026	4.56655	4.03406	5.0762	3.81584
Charlie22a	1.81383	4.7062	2.90331		5.78917	4.00819	6.40599	5.2108	6.9175	5.62613	5.50106	4.91885
Charlie23a	1.83017	3.7365	2.74798		5.26661	4.96525	6.95354	5.90553	9.30515	6.22216	6.73437	5.84084
Charlie24	4.55891	7.47746	5.43523		7.10694	6.76325	7.84986	5.80866	8.46419	6.2644	7.31546	6.07982
Charlie25	2.86888	3.29394	2.35112		4.42239	2.46728	5.01708	3.63021	4.77974	5.43015	4.01678	3.50997
Charlie26a	0.991068	2.26438	1.41835		1.94991	1.18181	1.60784	1.86064	2.55903	2.82858	1.9471	1.67158
Charlie29a	3.35572	4.66743	3.47071		6.85554	3.79422	6.69615	5.00375	7.84741	4.70707	5.83578	4.4985
Charlie29b	2.27042	2.97992	2.88998		5.26763	4.65756	5.53203	4.77564	6.793	4.6221	5.94865	4.22617
Charlie2a	22.3773	26.0954	18.6699		19.7145	14.1195	18.0684	12.6735	18.5504	17.5338	14.4704	12.3496
Charlie2b	12.6752	23.8224	17.0699		16.6877	10.8851	18.3873	16.4881	15.4484	18.6807	17.3721	14.6531
Charlie3	1.54746	2.47597	1.71921		4.27764	4.04302	5.29131	3.30526	4.95493	3.98757	4.27994	4.08412
Charlie30a	1.06062	1.75125	0.845186		3.15974	2.38435	5.40078	3.81478	9.04475	5.63333	7.5045	5.74646
Charlie30b	2.27181	3.75631	2.56247		4.09991	2.8749	4.77863	3.39353	4.74407	2.46519	4.10572	3.41223
Charlie31a	1.51268	2.55865	2.12415		4.05905	3.42102	3.85794	2.59367	5.35205	4.50442	4.32296	4.29832
Charlie32a	0	1.44575	0.847344		0.789614	0.767138	1.35097	1.06807	1.3683	1.35695	1.17147	0.933754
Charlie4	2.20817	3.50238	2.24277		5.50014	3.84937	6.24219	4.4516	5.73509	5.69826	4.5353	4.29423
Charlie4a	9.42662	12.3464	8.26852		16.5418	11.5208	18.4505	15.2821	19.8245	19.6239	21.4368	17.7121
Charlie4z	32.5049	48.8892	33.2941		45.1827	33.5907	46.1798	38.0248	50.9176	38.7676	46.5709	41.8321
Charlie5	27.5586	35.8551	28.4833		34.4802	27.0435	62.9065	80.0507	59.6247	131.327	116.233	101.903
Charlie6	0.591163	1.51781	1.07756		2.44692	1.76234	1.45201	0.854856	1.34142	0.949612	1.24712	0.839443
Charlie7	7.89377	12.2436	8.66852		16.9835	12.241	20.3167	16.465	22.5046	17.6235	18.5488	14.9857
Charlie7a	1.79088	2.56138	1.4949		3.65008	2.34288	4.32224	3.50405	4.95974	3.77277	3.90368	3.88061
Charlie7b_Mars	0	0	0		0	0	0	0	0	0	0	0
Charlie8	16.3961	27.031	20.5706		41.1195	30.0291	39.4265	32.9371	40.527	32.5948	37.7493	34.1699
Charlie9	4.83363	4.30868	2.57228		6.55142	4.93456	12.3404	6.59174	19.7115	7.52114	8.58351	7.11084
Cheshire	34.5831	43.1582	27.8082		38.4161	32.1157	36.4905	34.8279	25.187	53.6928	38.1925	29.5986
Chompy-6_Croc	0	0	0		0	0	0	0	0	0	0	0
Chompy-7_Croc	0	0	0		0	0	0	0	0	0	0	0
DNA1_Mam	0	0	0		0	0	0.538732	0.626929	0.669733	0	0	0.49971
ERV24B_Prim-int	0.991068	1.59461	1.40187		2.30401	3.22198	3.01706	2.43754	3.64731	3.75245	3.49455	3.45393
ERV24_Prim-int	0.539002	1.38453	1.01582		1.90277	2.20189	2.90808	1.68097	3.91969	1.89653	2.92337	2.45278
ERV3-16A3_I-int	17.4734	27.7118	21.9414		43.4099	40.4232	48.067	40.1349	60.808	41.9656	45.8534	44.8848
ERV3-16A3_LTR	1.06062	2.12776	1.62238		4.30429	5.5773	4.32243	4.55446	6.29761	3.42094	4.45024	4.27083
ERVL-B4-int	53.6637	58.142	44.9082		81.0837	45.9798	58.5191	56.7108	59.9498	45.9798	57.5709	55.3145
ERVL-E-int	29.5022	48.9029	40.2943		79.0017	50.9537	60.8282	49.2674	67.8162	47.4935	55.4461	53.3477
ERVL-int	3.77301	4.32541	4.79746		9.93019	4.78943	7.00719	7.0904	11.3348	5.76881	8.98313	6.07228
ERVL47-int	0	0.621911	0.474426		1.06363	0.808605	1.16696	1.35539	1.47714	1.77739	1.31633	1.17269
EUTREP15	0	0	0		0	0	0.664552	0.553925	0.733605	0.848548	0.746715	0.5644
EUTREP16	1.61701	1.68119	1.14446		1.55259	1.43061	2.03142	1.52251	2.6045	1.78133	2.56265	1.99767
EUTREP4	0	0.823317	0.428967		1.45787	1.55501	2.54766	2.54059	1.45003	1.63894	2.3538	2.11969
EUTREP7	0.608551	0.568201	0.688773		0.99462	0	0.496462	0.917197	0.458677	0	0.740449	0.892229
EUTREP8	0.747648	0.960932	0.632189		1.76289	1.76234	2.52974	1.79932	2.19793	1.00607	1.70648	1.64726
Eulor1	0	0	0		0	0	0	0	0	0	0	0
Eulor10	0	0	0		0	0	0	0	0	0	0	0
Eulor11	0	0	0		0	0	0	0	0	0	0	0
Eulor12	0	0	0		0	0	0	0	0	0	0	0
Eulor2A	0	0	0		0	0	0	0	0	0	0	0
Eulor2B	0	0	0		0	0	0	0	0	0	0	0
Eulor2C	0	0	0		0	0	0	0	0	0	0	0
Eulor3	0	0	0		0	0	0	0	0	0	0	0
Eulor5A	0	0	0		0	0	0.657785	0.493431	0.826194	0	0.704476	0.578687
Eulor5B	0	0	0		0	0	0	0	0	0	0	0
Eulor6A	0	0	0		0	0	0	0	0	0	0	0
Eulor6B	0	0	0		0	0	0	0	0	0	0	0
Eulor6C	0	0	0		0	0	0	0	0	0	0	0
Eulor6D	0	0	0		0	0	0	0	0.762777	0	0	0
Eulor6E	0	0	0		0	0	0	0	0	0	0	0
Eulor7	0	0	0		0	0	0	0	0	0	0	0
Eulor8	0	0	0		0	0	0	0	0.441371	0	0	0
Eulor9A	0	0	0		0	0	0.597581	0	0.563969	0	0.529541	0
Eulor9B	0	0	0		0	0	0	0	0	0	0	0
Eulor9C	0	0	0		0	0	0	0	0	0	0	0
EutTc1-N1	0	0	0		0	0	0	0	0.437114	0	0	0
EutTc1-N2	0	0	0		0.605272	0	0.485567	0.90728	0.839392	0.54772	0.801346	0.684035
EuthAT-2	4.3294	5.16389	4.29722		7.20925	6.94571	11.0183	6.82936	11.4529	13.1332	9.51839	8.90281
EuthAT-N1	0	0	0		0	0	0	0	0	0	0	0
EuthAT-N1a	0.504228	0	0		0.422647	1.22327	0	0	0.556311	0.814773	0	0.559012
Eutr10	2.20817	4.26255	3.13184		4.74167	4.62356	5.90109	4.95753	5.70787	3.31887	5.88216	4.82867
Eutr11	2.83411	3.39608	2.69089		4.22721	2.30141	6.4886	4.7461	4.74483	5.66013	4.58344	5.72014
Eutr15	0	0.645953	0		0.827583	0.850072	1.64438	0.626148	1.56831	1.11239	1.23437	0.935319
Eutr16	0.570299	1.19691	1.16718		2.36024	1.18181	1.90595	2.10786	2.45397	2.32417	2.21061	1.98571
Eutr18	1.16494	3.60901	2.53775		4.85955	4.87236	4.61374	3.12589	6.09699	3.57933	5.11201	4.20989
Eutr2	0	0.428697	0		0.561551	0.933005	0.832528	0.655922	1.27828	0.493876	0.617398	0.481699
Eutr2B	0	0.621714	0		0.852229	1.38873	1.90986	1.73217	2.40124	1.7418	2.04964	1.61751
Eutr5	0.469453	0.853877	1.05099		2.0294	0.850072	1.7952	1.48404	2.30632	1.93422	2.16149	1.81873
FAM	30.584	33.6124	28.1522		44.8229	32.8957	36.1533	27.6883	43.9757	24.2856	36.6623	31.0674
FLAM_A	45.6594	63.2734	51.978		91.5262	71.4504	99.2225	67.751	106.074	51.3574	82.7937	67.6467
FLAM_C	81.8334	117.658	91.0749		162.984	133.609	171.83	123.488	184.338	99.3368	150.166	120.202
FRAM	56.6481	93.1455	73.1709		141.866	122.809	150.137	104.756	166.33	86.4072	133.484	114.232
FordPrefect	2.45159	3.04864	2.20519		4.0962	2.84048	3.63638	2.92144	5.58248	2.37409	4.06902	3.17466
FordPrefect_a	0.817197	0.794843	0.662104		1.39096	1.30621	1.37533	0.830083	1.64751	0	0.892434	0.826299
HAL1	109.43	142.356	106.358		207.049	172.372	255.236	183.719	286.354	230.484	229.172	187.859
HAL1M8	16.8829	29.5868	20.9807		26.2484	23.802	30.4158	29.4134	25.6211	42.0296	30.9411	30.4137
HAL1ME	21.1713	29.2319	21.7587		36.8591	26.5745	53.8087	41.2793	53.5304	48.0224	45.7229	35.5687
HAL1b	8.05026	13.4304	10.3021		20.9729	14.6751	28.7235	25.1862	28.9903	22.522	23.4824	20.3244
HERV-Fc1-int	8.75131	16.3212	17.7204		12.7855	4.93456	9.22875	7.76588	15.6079	2.40142	5.14981	6.37095
HERV-Fc1_LTR1	0	0	0.413523		0.44066	0	0	0	0.486793	0	0	0
HERV-Fc1_LTR2	0	0	0		0	0	0	0	0	0	0	0
HERV-Fc1_LTR3	0	0	0		0	0	0	0	0	0	0	0
HERV-Fc2-int	0	0.523412	0.807883		0.564544	0	0.550151	0	1.06494	0	0	0
HERV-Fc2_LTR	0	0	0		0	0	0	0	0	0	0	0
HERV15-int	0.740693	0.922619	0.592889		2.0933	1.42232	2.14643	2.57454	4.38729	2.26854	2.58859	2.43881
HERV16-int	10.5888	11.9341	9.94972		15.9341	9.97279	11.8109	9.51748	17.054	10.4457	13.1089	11.1235
HERV17-int	4.98281	10.0113	5.90998		13.5238	14.3463	15.6889	9.78317	27.5159	11.5187	16.4707	11.8506
HERV1_I-int	0.782422	3.0438	2.29805		7.54197	5.4529	2.83179	2.06337	2.62666	3.165	2.4741	2.10542
HERV1_LTRa	0.782422	0.575346	0.658128		0.884968	0.518336	0.626967	0	0.835973	0	0.404165	0
HERV1_LTRb	0	0	0		0	0	0	0	0	0	0.48697	0
HERV1_LTRc	0	0.447517	0		0.593083	0.684204	1.16706	0	1.3113	0	0.544827	0.615102
HERV1_LTRd	0	0	0		0.421935	0.684204	0.660115	0	0.614576	0.410861	0.707898	0.401715
HERV1_LTRe	0	0	0		0	0	0	0	0	0	0	0
HERV3-int	4.78147	6.45512	5.02398		9.14187	10.2838	9.01964	6.96738	11.2466	7.44318	8.83152	7.72206
HERV30-int	0	0.756085	0.462051		0.695836	1.76234	1.15983	0.713962	2.24233	0.616016	1.18641	0.732471
HERV35I-int	2.24294	1.70073	1.83096		3.34743	2.73682	4.37548	1.99611	4.62289	2.38572	2.5148	2.26143
HERV4_I-int	4.85276	8.46922	6.44992		11.6436	12.0407	14.0472	8.35277	17.7223	10.8897	12.1348	12.266
HERV9-int	2.7576	3.74434	3.42763		7.47933	8.72132	9.9279	9.44563	16.1745	8.96588	10.2274	8.47667
HERV9N-int	4.17987	4.41334	3.33299		5.73977	3.57486	5.4695	4.01465	8.46193	3.906	5.30002	5.16024
HERV9NC-int	2.35248	3.70676	2.37511		5.3191	7.80076	8.31985	4.74817	15.1599	7.25311	7.52443	6.18743
HERVE-int	10.8496	15.4739	12.7672		23.8725	20.4208	29.6672	36.3568	26.6735	20.9779	26.1875	28.8147
HERVE_a-int	14.1128	16.5827	12.8628		17.4163	12.6076	12.6629	8.507	9.46955	8.87014	10.4821	8.84474
HERVFH19-int	0	0	0		0.742081	1.01594	2.38522	2.11083	6.01467	1.3186	1.38149	1.1096
HERVFH21-int	2.20817	3.22774	2.54783		6.43733	6.90424	7.13339	6.05824	15.0534	4.0264	4.22789	4.37123
HERVH-int	32.7884	73.0393	79.2589		224.357	254.849	339.555	266.439	675.098	160.775	213.003	227.201
HERVH48-int	5.65083	8.61045	9.70162		15.9328	14.5342	22.416	15.674	53.0457	7.4699	15.896	15.7969
HERVI-int	0.762601	2.87822	2.32023		5.28063	3.55869	3.99224	3.34803	5.55614	2.39424	2.71185	2.50227
HERVIP10B3-int	5.90885	10.6226	7.69631		16.8857	10.5915	12.6287	8.96358	19.495	6.69455	10.636	9.7141
HERVIP10F-int	5.34203	10.7795	7.89759		18.3354	10.9697	12.7454	9.59539	12.5642	8.71705	8.7548	8.52133
HERVIP10FH-int	2.44116	5.24832	4.08588		8.32713	9.81563	11.5546	6.94406	15.9098	8.07468	9.95661	7.59777
HERVK-int	15.5076	30.365	24.5353		59.336	47.1628	53.5865	39.851	61.3767	56.5237	61.7107	52.3862
HERVK11-int	5.7701	10.5801	8.91411		14.5753	13.716	18.3069	10.0313	21.3585	14.1549	14.7227	13.7815
HERVK11D-int	1.23101	0.559555	0		1.34965	0.740184	1.47965	1.02979	5.24828	1.21695	1.25987	1.31862
HERVK13-int	9.82201	12.8306	10.9158		19.3047	19.8527	7.14168	5.44195	14.1973	5.83242	9.02573	9.70643
HERVK14-int	10.5307	14.5456	13.5624		25.3305	13.7048	15.8233	12.0805	15.7313	12.1396	12.3208	12.9238
HERVK14C-int	2.31249	2.21803	2.11513		3.51797	4.01607	4.2632	2.57354	3.55678	4.3041	4.78107	2.76937
HERVK22-int	3.1123	5.3454	4.06373		8.42178	6.4481	10.3273	7.01874	12.5774	4.18104	7.3842	7.19435
HERVK3-int	11.7189	20.1469	16.025		33.403	17.7271	22.3863	18.6766	21.7849	15.3594	20.7886	21.1645
HERVK9-int	14.8918	22.4949	15.1955		35.5308	34.3255	43.2379	31.3377	49.0935	34.7294	41.3038	38.8115
HERVKC4-int	0	0	0		0.643956	0.435403	0.858124	0	0.897651	1.12995	0.782329	0.723522
HERVL-int	21.9249	30.3278	22.8437		41.3109	34.1646	43.601	50.9175	49.3799	41.4556	55.7321	42.7647
HERVL18-int	2.72978	2.87946	2.63709		4.3134	3.13075	5.26178	5.26481	5.52921	5.45036	6.47456	7.71312
HERVL32-int	0	0	0		0	0.559803	0.533589	0.626561	1.69819	1.50796	0.619357	0.421911
HERVL40-int	16.5004	23.7612	19.1197		21.9482	12.3571	15.205	13.7396	14.4419	12.0266	14.1438	14.4273
HERVL66-int	2.57886	3.19464	2.75158		3.3564	3.23442	3.91991	2.93162	3.64062	3.61588	3.68427	2.9089
HERVL74-int	9.40645	13.1887	10.5599		10.4734	5.90903	6.17902	4.58943	8.22409	3.25117	6.62299	5.17818
HERVP71A-int	1.79088	2.65693	1.86473		4.66217	3.42102	7.6454	8.54789	5.39885	8.18983	8.1811	9.60424
HERVS71-int	7.58845	12.2999	8.75711		18.4504	20.026	23.9356	19.1839	30.237	17.6341	16.9949	18.8024
HSMAR1	10.2758	10.0892	9.08852		14.3164	9.86912	13.4776	9.55327	17.2361	15.0877	13.2295	11.3617
HSMAR2	12.1397	19.1782	14.1946		26.4479	17.8598	24.979	23.9262	20.5939	22.7335	25.9581	22.994
HUERS-P1-int	5.23354	7.12249	5.13167		11.3741	4.45562	7.05377	7.29763	8.22921	5.13981	6.37092	6.10483
HUERS-P2-int	0.712874	1.50472	1.41496		2.41443	2.05261	3.08516	1.65629	4.42142	4.29501	2.26561	2.01797
HUERS-P3-int	10.8844	11.8829	9.77316		19.5804	14.161	21.6341	14.9531	22.232	17.6966	18.5512	20.4912
HUERS-P3b-int	4.71192	9.11906	6.23315		12.0786	9.14345	16.9032	11.3395	17.7913	12.3653	12.2653	9.29075
Harlequin-int	18.2857	26.3593	21.9649		37.3081	43.2993	41.5564	30.807	49.5298	26.4952	33.9307	29.3313
Kanga1	1.58223	2.80927	1.6811		2.4042	1.90043	2.96158	2.12226	3.60642	2.60696	2.94117	2.32083
Kanga11a	10.2584	12.8806	9.25004		18.5779	10.1747	20.3977	25.6275	18.3965	23.1977	20.71	13.9603
Kanga1a	1.65178	2.21939	1.45971		4.04507	2.63315	4.24082	4.15524	4.21665	4.82277	4.13494	3.91147
Kanga1b	0.469453	0.95715	0.597067		0.862832	1.01594	1.0486	1.10654	1.01434	1.3832	1.40148	1.13704
Kanga1c	3.77301	7.75413	5.41248		7.58674	6.10227	5.2572	4.35868	4.35112	4.80056	5.71548	4.41352
Kanga1d	1.33881	1.66226	1.30454		1.73425	1.47208	2.25933	2.08315	1.80251	2.18231	2.2227	1.55921
Kanga2_a	2.85149	5.90605	3.70266		8.20522	5.41143	12.9043	10.6555	10.1018	11.7158	10.5907	7.94251
L1HS	34.8814	28.2655	24.1027		20.8541	31.6268	65.7035	49.2447	126.798	51.1792	55.5123	49.4132
L1M	0.434679	1.19558	0.727538		1.82033	1.22327	2.78738	2.42322	1.45347	1.73746	1.69948	2.01229
L1M1	27.9599	43.4732	31.0573		59.4412	52.1538	84.9202	64.6669	110.247	85.8854	88.9178	61.3772
L1M2	54.6917	81.9356	63.3724		79.6629	58.5894	78.0838	62.3149	86.4123	79.7124	66.8128	59.2411
L1M2a	1.51268	4.2422	3.12535		5.87469	4.04302	5.55017	3.24458	7.62439	3.87263	4.88262	3.78786
L1M2a1	0.434679	0.455327	0.405213		0.810456	1.14034	1.2638	0.519638	1.69827	1.30502	1.02298	0.821441
L1M2b	0.434679	1.42935	0.815857		0.979401	0.933005	1.77486	2.72621	4.71754	4.18798	5.27134	3.45994
L1M2c	0.782422	2.03437	1.31386		3.36452	3.53132	6.20508	3.73604	9.96994	3.44947	4.54427	4.28989
L1M3	25.6871	36.6556	24.8484		46.0921	36.5659	51.0805	39.0096	49.0212	57.1087	50.2974	40.2893
L1M3a	14.1531	17.2142	15.3509		12.6209	9.59959	11.2252	9.64895	9.96562	11.1481	14.6978	13.2612
L1M3b	4.55544	6.62918	4.75619		6.72684	5.66023	6.10327	5.89938	4.89173	5.7913	6.27882	7.16638
L1M3c	1.79088	3.04936	2.1196		4.2563	4.01814	5.20284	5.05969	6.95535	6.24656	5.40711	4.565
L1M3d	1.26926	2.5721	1.42077		2.52339	1.67941	3.25594	3.52795	5.43464	3.09473	4.74641	2.78744
L1M3de	2.90366	6.08933	4.38404		10.2846	7.73316	9.39171	7.18921	8.15547	8.53517	8.90771	10.1045
L1M3e	0.799809	2.18622	1.24478		2.77321	3.83569	4.26745	3.23292	5.70645	3.75375	3.73321	2.74967
L1M3f	1.04323	2.4411	1.80649		4.17308	3.04574	6.34974	3.77417	7.93529	4.91988	4.81391	3.58436
L1M4	99.5464	153.753	107.549		174.183	130.697	195.055	152.954	187.056	196.079	185.708	151.39
L1M4a1	7.49108	11.1339	8.99105		15.7157	11.636	21.4744	19.6545	23.8965	21.5418	21.9213	17.7713
L1M4a2	6.29067	9.74449	6.22836		11.5005	13.3316	15.7845	12.0539	17.7856	12.8099	13.2915	10.773
L1M4b	15.1967	23.2227	17.7089		33.7906	21.6457	39.4759	36.5538	44.8029	46.7154	44.4194	37.4948
L1M4c	18.9158	29.3203	17.1731		29.8466	27.6315	41.9057	28.8542	33.9629	42.9014	36.5378	26.3305
L1M5	170.048	239.415	167.43		269.214	179.752	299.525	257.013	277.145	346.646	281.809	241.051
L1M6	8.06764	13.7268	9.46127		16.244	13.8375	26.3274	22.029	29.6181	27.618	27.0979	21.0045
L1M6B	45.1833	29.6192	32.8591		39.3559	19.6553	25.2835	30.5855	16.2976	25.2803	19.0006	24.0436
L1M7	6.03891	8.11665	5.6634		12.6973	9.21187	18.2655	12.519	23.1104	20.6685	18.866	14.4325
L1M8	3.49482	6.21963	4.0541		7.44013	8.45469	10.5384	7.45388	12.7186	8.3582	10.9775	8.21966
L1MA1	30.9074	40.0342	33.9757		83.632	47.8918	70.5902	53.4751	61.8333	54.247	54.8942	46.581
L1MA10	10.9011	23.3584	15.054		26.3737	15.6529	25.4951	18.779	25.8634	20.6359	21.0761	16.6713
L1MA2	23.7404	43.5859	29.8308		69.3441	48.0548	90.2925	68.6691	88.8222	72.7165	73.6593	53.7871
L1MA3	29.1141	53.5289	34.3175		83.5065	71.8489	126.688	80.0838	139.607	98.0789	104.868	75.4424
L1MA4	29.1311	58.0427	37.8346		81.563	69.3003	105.24	78.4914	108.272	104.359	101.87	73.096
L1MA4A	30.7781	38.8051	30.8123		68.8283	54.2702	95.4061	61.1387	115.615	68.2955	71.5125	58.6458
L1MA5	28.7246	51.1775	39.4139		74.9556	60.0967	80.2215	60.4035	90.945	60.8711	69.6241	58.2777
L1MA5A	19.136	28.3423	20.2046		34.575	20.1525	37.1728	28.9505	38.026	35.7944	30.6609	26.9903
L1MA6	23.2581	37.3687	27.6181		45.3839	29.1757	52.4773	42.3599	49.0313	59.2917	48.6983	40.4647
L1MA7	26.9936	39.4491	29.6483		58.5532	33.0918	66.8601	51.6503	73.1093	76.2048	61.3091	49.1873
L1MA8	40.7729	63.4476	41.3678		74.7593	46.97	85.0048	62.487	87.8693	108.303	75.6668	60.004
L1MA9	63.1217	91.4069	67.1518		132.046	71.4056	126.804	101.823	139.349	139.924	121.28	97.2856
L1MB1	21.9687	39.5866	24.4371		45.8786	28.62	47.5432	39.9589	55.3532	52.5345	51.0971	40.8111
L1MB2	47.9124	77.7132	54.6001		101.131	78.4392	107.104	82.678	109.503	125.49	100.702	81.6062
L1MB3	80.4184	136.299	103.485		215.17	157.388	222.036	172.048	262.507	184.055	197.794	184.522
L1MB4	58.1117	91.2953	62.1173		117.795	91.3101	136.712	130.68	130.206	166.806	160.052	144.213
L1MB5	93.6469	133.969	103.896		172.106	115.541	171.6	128.45	153.544	158.292	146.27	138.664
L1MB7	130.231	203.119	145.591		280.167	211.216	332.087	263.104	346.763	306.211	317.385	267.954
L1MB8	100.931	145.824	107.215		215.732	143.975	242.516	202.303	244.096	231.293	225.659	198.165
L1MC	22.8008	36.2536	23.9208		42.5939	30.0079	51.5119	43.4633	46.8093	63.4	51.693	44.3202
L1MC1	88.1877	124.692	99.6322		191.704	124.67	202.286	166.31	205.971	216.146	204.568	185.364
L1MC2	40.566	54.7774	42.7619		61.1328	42.2212	67.0799	55.6625	70.9981	64.8113	59.8511	52.5472
L1MC3	58.6622	109.364	77.9857		136.615	83.555	133.685	110.909	145.786	134.664	129.169	106.36
L1MC4	127.414	186.167	132.357		260.223	168.935	264.727	207.366	272.84	261.427	254.307	219.613
L1MC4a	57.2883	87.5798	65.5093		115.155	91.4777	143.586	112.373	166.352	162.847	142.03	126.247
L1MC5	64.0574	93.3432	66.9209		130.483	83.0835	137.247	105.111	136.71	157.31	132.53	108.813
L1MC5a	116.339	142.47	99.7242		184.289	118.037	183.168	143.284	181.849	191.439	173.616	143.807
L1MCa	27.8149	58.2208	37.5004		65.5758	52.0949	81.5801	66.7074	72.571	97.9951	78.1305	63.1768
L1MCb	4.10337	6.25016	4.11412		7.73043	7.44331	10.9246	9.0617	15.1158	9.45817	9.70876	7.08938
L1MCc	7.73937	14.2384	9.67492		17.7197	17.1719	21.9052	15.4351	25.2705	14.3159	18.6845	15.0732
L1MD	74.2456	91.754	105.467		88.224	59.5602	90.9064	63.0914	79.4415	93.5786	73.8477	57.8321
L1MD1	28.7292	48.5817	37.1682		84.9342	65.8395	105.751	78.8395	126.798	88.8568	92.2959	82.3312
L1MD2	64.9463	102.851	74.7428		152.942	93.488	152.974	115.85	169.603	151.512	144.088	124.762
L1MD3	26.6775	35.6234	26.2554		48.3182	32.7253	47.6042	39.4974	47.7005	44.0239	45.674	37.1209
L1MDa	53.3254	71.5353	49.5974		75.5713	48.8999	77.6916	57.6999	80.397	78.2986	67.7257	54.9654
L1MDb	2.71935	3.96836	2.61917		4.30489	2.6912	4.34772	2.78648	5.26694	4.65899	4.22752	3.2577
L1ME1	188.952	279.85	206.193		375.999	271.648	419.384	336.571	422.652	453.449	406.391	334.697
L1ME2	81.4592	109.632	80.2187		143.581	92.0491	141.402	120.148	145.735	177.035	138.623	116.184
L1ME2z	28.8349	41.853	27.5336		53.6176	43.0174	62.3675	51.8218	66.6218	73.3891	65.2541	53.0205
L1ME3	30.439	52.0954	36.5725		76.4158	51.6325	79.8486	60.9846	86.5586	78.306	71.9198	66.7894
L1ME3A	82.2308	99.0148	76.641		142.804	97.2291	151.149	119.395	164.893	162.093	151.35	125.702
L1ME3B	59.9318	86.0102	62.8282		104.797	66.1828	113.06	96.3698	98.7494	122.45	106.322	94.4454
L1ME3C	5.96414	9.6625	7.37391		16.927	11.2579	21.9198	16.5614	21.4021	17.8605	17.4017	14.5213
L1ME3Cz	37.541	60.9015	38.3135		75.0433	52.1318	94.8822	76.8434	104.716	115.723	94.9874	73.9598
L1ME3D	28.1498	36.1395	29.1092		41.0014	23.9264	39.4163	27.7718	39.3172	49.4642	32.3543	26.3876
L1ME3E	39.6253	48.4796	36.8427		53.6363	36.9516	54.9742	41.4903	55.1148	67.5801	52.9137	43.2788
L1ME3F	17.2936	26.7225	19.343		41.9817	25.233	55.7911	49.2238	58.356	70.9291	65.6886	69.7852
L1ME3G	69.7163	97.8912	71.188		126.174	85.0573	145.106	121.222	143.051	174.901	146.58	122.579
L1ME4a	79.9886	109.885	73.8096		142.65	84.3358	192.447	192.131	183.204	278.093	203.461	166.61
L1ME4b	110.34	157.459	113.684		206.186	136.295	235.708	182.467	225.748	255.44	215.723	181.843
L1ME4c	32.6395	45.6139	30.2015		55.7331	38.9432	64.0169	57.7412	66.5109	81.1505	63.6293	54.3223
L1ME5	9.7775	13.9436	10.6016		19.982	16.6618	23.3789	18.7907	26.3544	28.1592	25.1005	23.0592
L1MEa	1.02584	0.978213	0.731414		1.83489	1.34767	4.3804	4.53196	5.54432	6.87868	4.04585	2.92514
L1MEb	4.64237	6.47297	4.07965		7.88971	8.81172	12.5015	9.54409	9.88479	9.15827	10.4192	8.13988
L1MEc	59.1702	102.531	74.5851		142.501	126.781	157.492	123.42	159.691	149.538	136.606	119.052
L1MEd	49.945	77.1871	54.7283		107.971	78.7088	147.451	121.771	156.33	160.176	147.907	132.36
L1MEf	49.3729	71.0996	45.9446		79.9669	59.2595	99.1145	80.9768	100.928	115.506	93.6312	76.7109
L1MEg	43.0099	72.1591	48.9913		90.1968	74.1735	119.945	102.743	105.684	120.28	109.196	90.3482
L1MEg1	0.782422	2.61423	1.5443		3.4648	3.37955	4.90238	2.82384	5.25165	5.17968	4.01413	2.74056
L1MEg2	6.48541	8.3395	6.33408		9.96497	5.36996	9.97374	8.70123	9.5503	7.41364	9.80597	8.96679
L1MEh	4.29254	8.14426	6.17929		10.9044	8.47625	15.1918	11.7306	20.6254	14.0958	13.7541	10.4975
L1MEi	9.75454	16.215	12.3336		24.0376	15.7296	30.2168	27.5124	36.5984	26.2768	29.1903	25.695
L1MEj	9.16303	14.0064	9.88178		16.5137	9.48141	17.954	13.783	20.8648	16.869	15.7753	13.7918
L1P	0	0	0		0	0	0	0	0	0	0	0
L1P1	8.62021	14.9334	10.8784		22.9735	17.6516	29.613	23.5245	29.418	23.5102	26.638	19.4729
L1P2	13.1023	22.5834	17.5751		30.7619	25.9931	37.8219	27.7266	45.2068	27.0767	30.0305	26.9298
L1P3	16.5794	24.7692	16.4464		24.9547	18.5486	29.9408	26.8692	33.6118	28.6792	28.3053	22.7419
L1P3b	0	0.584711	0		0	0	0	0.445736	0.932689	0.540234	0.748048	0.552274
L1P4	10.7971	13.2976	9.59029		16.206	11.189	19.7351	15.8155	21.4009	17.9933	17.7939	13.6491
L1P4a	1.33638	2.06406	1.41123		2.95105	2.88195	5.55479	3.6389	5.98144	5.21222	5.27339	3.92164
L1P4b	1.5791	2.17075	2.30949		2.8832	3.46249	2.45871	1.68455	1.46934	1.72492	1.64858	1.88482
L1P4c	0	0	0		0	0	0	0	0	0	0	0
L1P4d	0	0	0		0.73941	0	1.59719	0.952724	2.11881	1.17244	1.27697	0.799299
L1P4e	3.28617	4.75775	3.84882		4.504	4.02478	2.02437	2.7397	3.21941	2.40456	2.52948	2.09025
L1P5	0.573776	0.977405	0.709748		1.41135	1.18181	1.19767	0.74404	1.67193	1.23441	1.09006	0.909779
L1PA10	236.058	111.419	147.548		180.602	112.049	409.574	287.695	410.352	227.665	256.34	231.92
L1PA11	24.1355	38.608	31.1513		63.7253	45.2404	63.6778	46.4421	68.3744	45.0268	50.0821	41.7423
L1PA12	6.29937	17.0948	12.47		28.199	24.9788	31.7329	20.7044	28.097	23.5453	25.6203	22.8656
L1PA13	35.1043	60.9667	43.1506		81.6687	65.208	102.06	69.2635	121.058	81.1672	88.9595	70.7759
L1PA14	18.1105	32.0198	18.612		34.4316	29.2134	41.1602	32.8417	43.3831	39.7612	41.29	35.691
L1PA15	26.9922	46.6328	32.151		68.9575	57.7319	88.005	55.039	104.572	69.8575	72.8637	54.3761
L1PA15-16	2.26589	3.96274	2.81769		5.94207	8.43105	9.77919	7.38246	10.628	9.78411	8.4577	6.91396
L1PA16	56.3156	80.24	57.5493		128.639	103.962	145.479	106.419	146.148	124.783	131.291	103.064
L1PA17	15.8637	32.1306	20.0323		43.8463	39.3293	54.5719	33.2909	51.3274	47.4459	47.0149	35.4093
L1PA2	17.722	35.5412	26.5344		64.0122	39.9115	73.2856	54.161	78.0797	60.6254	64.7085	53.1007
L1PA3	71.2606	123.747	95.9876		232.018	129.211	209.732	156.263	203.422	179.4	180.513	158.684
L1PA4	80.2588	124.489	95.8711		224.678	139.748	246.72	182.126	229.725	199.707	213.951	193.242
L1PA5	71.0419	125.699	95.6133		220.842	145.205	242.704	166.624	219.162	182.967	200.281	178.79
L1PA6	50.9639	95.7073	75.5049		177.793	121.492	206.766	136.375	297.322	156.814	163.643	138.688
L1PA7	145.366	212.634	166.701		324.655	224.017	338.18	219.996	385.193	280.828	286.995	236.791
L1PA8	29.3151	53.4925	37.5258		87.9086	61.2425	97.4959	61.3691	108.836	83.5096	88.614	68.0256
L1PA8A	15.2545	23.0172	16.2111		30.3984	25.9612	44.6931	29.233	45.1527	35.4238	36.9849	27.689
L1PB	3.98166	7.49474	4.90124		10.7657	7.67718	11.3606	7.66881	11.1695	13.7149	9.60989	8.13801
L1PB1	36.2974	72.6941	52.5032		133.087	113.83	193.793	132.924	194.394	147.048	156.204	123.123
L1PB2	4.43025	10.07	7.01047		19.2756	15.944	27.7076	16.1449	27.3367	18.9554	23.0727	14.4592
L1PB3	8.30063	14.343	9.7186		21.8837	21.229	31.8301	24.2627	34.7083	30.5284	28.2069	21.6059
L1PB4	23.0797	26.5278	19.4957		47.3749	36.3093	62.647	46.1848	89.5947	86.1104	61.2005	50.0147
L1PBa	8.95474	15.4874	10.4375		21.1113	15.626	29.7456	15.8638	31.158	23.7702	23.8879	17.4989
L1PBa1	1.3562	2.76598	2.60643		4.06737	3.18383	5.07354	4.65756	7.88318	4.76645	5.30677	3.33421
L1PBb	0.747648	1.26662	0.904682		1.86731	3.71129	3.25671	1.75568	4.04277	2.45926	3.80188	2.5628
L1PREC2	19.8332	38.6299	25.8625		61.7978	49.9651	81.6498	64.8616	95.0552	79.0224	86.5971	68.9981
L2	200.878	344.694	277.12		576.518	464.465	798.398	497.355	1391.47	456.379	595.827	528.854
L2-1_AMi	2.55591	3.78318	3.20192		7.34338	5.7017	12.0536	7.9329	18.9753	6.56827	8.26257	7.04376
L2-1_Crp	0	0	0		0	0	0	0	0	0	0	0
L2-2_Mam	0.678099	0.700058	0.537093		0.799308	0.933005	1.16031	1.23952	1.87533	0.769349	1.07957	1.05144
L2-3_AMi	0	0	0		0	0	0	0	0	0	0	0
L2-3_Crp	3.77267	7.37852	5.65171		15.5776	14.4508	27.5757	14.2615	51.5823	13.1356	19.8739	17.4627
L2a	549.798	1038.61	779.762		1608.31	1302.25	2074.31	1344.62	3530.77	1316.89	1665.67	1504.36
L2b	245.167	504.401	377.187		780.255	679.564	995.184	681.119	1688.1	603.536	829.488	755.393
L2c	368.223	657.274	488.244		1025.89	839.816	1378.2	952.655	2166.97	903.342	1167.63	1067.57
L2d	63.8512	118.486	87.8475		170.165	136.501	220.239	145.774	332.913	141.384	181.059	158.246
L2d2	121.843	209.113	157.099		313.841	244.488	401.96	277.118	630.265	296.674	347.774	296.259
L3	173.553	273.694	191.308		345.845	263.684	358.407	292.746	461.371	286.874	355.528	323.585
L3b	27.0805	36.7411	28.4501		47.3327	35.8266	55.7955	48.2879	63.3367	39.3004	52.456	48.0288
L4_A_Mam	25.5995	34.8934	29.4598		66.1714	50.4097	74.2776	56.9113	74.1499	60.1021	67.7902	62.6179
L4_B_Mam	8.98916	14.0129	10.3367		19.0626	15.1976	23.6158	18.8906	25.92	19.3278	22.8583	19.0589
L4_C_Mam	14.7269	20.2776	14.8616		26.0056	21.4172	32.2192	25.6648	34.11	33.7753	32.3504	28.5453
L5	1.37359	2.98261	2.03095		2.85883	2.0522	3.15205	2.83828	3.25769	3.37687	2.75057	3.13589
LFSINE_Vert	6.67667	9.90535	8.10938		13.4797	12.4276	49.7481	25.0024	120.779	58.1322	61.1648	36.2666
LOR1-int	47.693	45.7978	37.6016		33.4672	21.4794	30.154	35.2786	29.4324	30.8005	28.0745	34.7105
LOR1a	1.90668	4.91381	3.65923		7.2042	6.65544	6.99788	5.63512	11.0345	5.66345	6.93571	5.99537
LOR1b	2.99616	6.46705	5.18512		7.9919	4.04261	6.76417	6.11326	8.21396	6.24786	4.954	5.81514
LTR06	0	0	0		0	0	0.771229	0.414127	1.01762	0	0	0
LTR1	0	0.432903	0		0.826563	1.63794	1.46172	0.898408	2.48255	0.845218	1.01634	0.678157
LTR101_Mam	1.37359	3.98254	3.43365		6.71701	3.50354	6.53378	4.28256	8.11762	5.80292	7.15226	5.75018
LTR102_Mam	0.643325	1.0674	0.936132		2.18216	1.59648	2.62261	3.0041	3.4517	3.78962	3.90682	3.89241
LTR103_Mam	1.60762	2.99952	2.75791		4.77275	4.64803	4.88558	4.9894	8.35919	4.16243	4.10931	5.2885
LTR103b_Mam	0.539002	1.35308	0.837551		1.90075	2.01115	2.10902	2.01363	4.46729	1.03645	1.87565	1.50756
LTR104_Mam	3.6513	4.51847	3.8789		7.31329	5.0175	9.27239	6.98325	9.72487	6.33054	6.95275	6.45141
LTR105_Mam	1.54746	2.84668	1.85689		2.86938	2.72313	3.19441	2.13898	3.32207	2.20235	2.48941	2.59461
LTR106_Mam	0.92152	2.43711	1.88447		3.91597	2.21848	4.10743	6.30543	3.66814	4.55945	4.44253	4.34157
LTR107_Mam	0.504228	0.953993	0.630243		1.48878	1.14034	1.39313	1.03079	2.15325	2.02635	1.40203	1.12232
LTR108a_Mam	1.6636	2.38743	2.12712		4.50205	2.58422	2.12184	1.89518	1.73325	0	1.72165	1.73307
LTR108b_Mam	0	0	0		0	0	0	0	0	0	0	0
LTR108c_Mam	0	0	0		0	0	0	0	0	0	0	0
LTR108d_Mam	0	0	0		0	0	0	0	0	0	0	0
LTR108e_Mam	0	0	0		0	0	0	0	0.415632	0	0	0
LTR109A2	0	0	0		0	0	0	0	0	0	0	0
LTR10A	0.991068	1.57046	1.51946		3.37927	1.63794	5.3663	2.59688	8.48107	3.35656	3.12809	2.82972
LTR10B	1.92997	0	0		0.855044	0.642737	0.890629	0	0.77496	0.691161	0	0
LTR10B1	0	0	0		0.728342	0.808605	1.27108	0	1.54936	0.589993	0.493524	0.4888
LTR10B2	0.643325	0.602759	0.464805		0	0.476869	0.482899	0	0	0	0.436605	0
LTR10C	2.59243	3.95038	3.37215		6.24188	4.76455	6.73591	4.38438	6.69694	4.29845	4.87904	3.98952
LTR10D	0.539002	1.05123	0.931845		1.36021	1.88674	1.91695	1.15663	2.79581	2.79444	1.82255	1.43011
LTR10E	1.16494	2.16038	1.75341		4.32569	2.92342	4.84235	3.86611	5.0691	2.18982	4.29373	3.35396
LTR10F	0.573776	0.778754	0.541418		2.02188	3.64909	4.38694	2.23899	10.8901	4.17418	2.80762	2.19138
LTR10G	0.557432	1.33314	1.01321		2.35711	1.50318	1.89076	1.16246	2.96093	1.67837	1.15939	1.5
LTR12	3.19924	5.76856	4.0951		7.88536	8.03629	9.95146	8.74443	12.5516	8.41813	10.6898	9.92204
LTR12B	0.434679	0	0.484085		1.09934	1.26474	1.84572	1.66897	3.40975	2.36732	2.43787	2.50294
LTR12C	34.0914	55.6418	43.3444		71.5242	81.9312	62.9259	58.31	85.8777	51.4752	65.4001	66.2262
LTR12D	1.8952	3.51877	3.37124		6.12392	7.72653	5.48009	5.3418	5.87868	5.70993	5.11435	5.75047
LTR12E	2.00578	1.95827	2.56986		2.91196	3.55288	1.72603	1.55091	2.61868	1.69982	2.31017	2.36414
LTR12F	2.18209	3.14395	3.04868		6.68609	5.53583	5.87328	4.67755	3.60648	3.47301	5.80791	5.04547
LTR12_	4.15553	4.62146	3.25486		5.17269	5.58559	6.09206	4.11971	6.81584	3.78978	5.60721	5.42834
LTR13	23.1256	42.8815	35.4338		61.6155	48.5851	50.2415	44.7747	46.7166	34.9226	42.9098	42.1391
LTR13A	4.5916	6.98098	8.20282		15.5805	19.0814	14.0563	11.7361	12.9322	10.3668	16.1425	15.5548
LTR13_	0.817197	0.674302	0.75666		1.57773	2.44655	1.83823	0.726429	2.10421	0.614168	0.873805	0.837635
LTR14	2.94747	3.91789	4.3006		4.61909	3.50395	4.36405	3.13089	4.36003	3.07522	4.51411	3.35582
LTR14A	0	0.464782	0		1.03107	0.850072	1.6096	0.64289	2.08876	0	0.933776	1.03461
LTR14B	1.06618	2.158	1.94916		3.5161	3.1096	3.76623	1.86186	5.53425	2.00989	3.42368	3.05782
LTR14C	0	0	0		0	0.709084	0.476136	0.526454	0.723443	0	0	0
LTR15	0.746257	1.47206	1.25886		2.80519	2.61573	4.04892	2.2387	4.49243	3.3653	3.36251	2.87607
LTR16	7.25045	12.6718	9.61563		18.0178	15.3635	16.0175	14.6842	24.5551	12.952	17.3881	15.3756
LTR16A	8.50232	14.8393	11.9651		22.3379	18.9918	25.3789	20.923	39.8721	20.8224	27.1227	25.6584
LTR16A1	3.14708	7.16082	5.47805		14.105	15.4634	16.3214	11.0454	24.4563	10.4051	13.2007	12.2196
LTR16A2	2.79933	5.91641	4.3444		7.81826	6.01685	7.59923	5.67637	13.784	8.161	8.26331	6.93203
LTR16B	2.26311	4.17344	3.26658		4.88289	3.91821	5.67256	4.82264	8.6073	3.80685	5.36461	5.09644
LTR16B1	2.66024	4.81725	4.26885		9.03574	7.94091	10.3943	7.60137	13.2574	7.10071	7.67473	8.42571
LTR16B2	3.1123	5.29827	4.2965		8.64483	7.60918	10.9783	6.34311	12.2792	6.21858	7.70673	6.18282
LTR16C	20.3451	29.0416	25.1713		49.7991	39.3629	62.8845	49.591	76.2974	47.4369	59.5973	61.4458
LTR16D	4.85102	7.23899	6.18845		8.32877	7.40184	9.37874	7.33383	11.3971	6.34621	9.66304	8.46964
LTR16D1	98.2201	4.44778	3.04128		4.3209	2.17701	1.7666	0.98743	1.99623	1.01555	1.62693	1.82756
LTR16D2	0.747648	1.04688	0.790058		1.47395	2.17701	2.03826	1.15533	2.38981	1.14572	1.82145	1.18439
LTR16E1	3.2514	5.02668	4.10582		8.21645	8.64585	11.7236	8.30774	14.0499	8.54205	11.2069	10.196
LTR16E2	3.28617	5.78709	4.29823		9.49682	8.95685	10.6569	9.00374	16.3741	8.95982	12.5432	10.411
LTR17	8.59134	10.9091	11.3295		10.5981	9.54568	13.6872	9.01155	20.3197	10.1567	11.3222	11.4327
LTR18A	0.539002	1.16108	1.12964		1.39358	0.974472	0.603398	0.401524	0.75879	0.417608	0.773073	0.738658
LTR18B	0.991068	1.03772	1.04734		2.17429	1.14034	1.60569	1.71003	2.9636	1.7486	2.78655	1.80517
LTR18C	0	0	0		0	0	0	0	0	0	0	0
LTR19-int	1.58223	2.90143	2.45618		3.11634	2.71608	3.50868	3.28893	6.66124	2.35658	3.76801	2.81614
LTR19A	1.86043	2.04697	1.95303		4.74814	3.75276	5.41178	3.36965	9.18682	2.75644	3.46921	3.11264
LTR19B	0.782422	0.947034	0.901895		1.54907	1.07773	1.72585	1.27582	2.09861	0.932067	1.27037	1.14635
LTR19C	0	0	0		0.446112	0.60127	0.72867	0	0.811617	0	0.545885	0.417731
LTR1A1	3.28617	5.79752	5.01542		10.2561	5.41143	5.71886	4.23482	6.3052	2.7449	3.55083	4.28046
LTR1A2	2.76456	6.74141	4.66311		7.35752	9.76504	10.9262	9.76274	11.566	5.30179	12.2565	11.3012
LTR1B	0.573776	1.43773	1.12366		1.94677	1.47208	1.47219	1.8766	3.92806	2.05625	2.62294	1.98594
LTR1B0	0	0	0		0.589133	0.435403	0.732681	0.475828	0.855632	0.794268	0.655429	0.481733
LTR1B1	0	0.812106	0.572886		1.10223	1.63794	1.75511	1.37971	3.30033	1.04922	1.55398	1.60513
LTR1C	0	0	0		0.401165	0.60127	0.80178	0.731606	0.548745	0	0.718944	0.637207
LTR1C1	0	0	0		0.731103	0	1.141	0	0.967567	0	0	0
LTR1C3	0	0	0		0	0	0	0	0.496083	0	0	0
LTR1D	1.37324	2.09325	2.30353		3.0616	4.00114	4.79658	3.41418	6.46556	3.80627	4.02517	3.0764
LTR1D1	0.851971	2.43725	1.59633		2.68803	3.00635	3.98002	2.94401	4.71849	2.82256	3.53422	3.30924
LTR1E	0.504228	0.461619	0.431997		1.53057	1.47208	1.88245	1.25732	3.64531	1.78767	1.55145	1.30767
LTR1F	0	0	0		0.727254	0.476869	0.733293	0	1.10629	0.469915	0.94083	0.70555
LTR1F1	0	0	0.447344		0.610851	0.974472	1.58388	0.85966	2.39177	1.54235	1.52921	0.994844
LTR1F2	0	0	0		0	0.642737	1.1713	0.861193	2.21301	0.742109	0.712012	0.530263
LTR2	5.51173	8.08051	7.22307		12.4919	19.6707	19.6142	12.2527	29.3277	13.0628	15.384	15.1432
LTR21A	1.30404	1.9827	1.39121		2.50953	1.84528	1.42397	0.844529	2.17796	0.651788	0.870158	0.821546
LTR21B	0	0	0		0.478521	0.60127	0	0	0.894985	0	0	0
LTR21C	0	0	0		0	0	0	0	0	0	0	0
LTR22	1.65178	1.32775	1.35016		1.1915	1.26474	1.32504	0.626152	0.565206	1.2129	0.477276	0.490224
LTR22A	0.539002	0.616567	0.526548		0.810474	1.38914	0.75103	0.714217	1.52693	0.61621	0.598101	0.707339
LTR22B	0	0.428722	0		1.17579	1.01594	1.50692	0.586651	1.72166	0.778408	0.868876	1.47979
LTR22B1	0	0	0		0.859474	0.850072	1.6068	0.846577	2.6195	0	1.017	0.668057
LTR22B2	0.643325	1.08125	0.920823		1.06902	1.01594	0.988991	0.733207	1.22028	0.688672	0.717515	0.658496
LTR22C	0	0	0		0	0.449087	0	0	0.415585	0	0	0.513953
LTR22C0	0	0	0		0.553632	0.60127	0.592907	0	0.667982	0.693271	0.541872	0.524622
LTR22C2	0	0	0		0	0	0	0	0	0	0	0
LTR22E	0	0	0		0.464402	0	0	0	0	0.410849	0	0
LTR23	1.33881	1.94604	1.74358		4.26382	2.63315	4.48362	2.94903	5.72275	2.7504	3.95692	3.17049
LTR23-int	0	0.607428	0		1.05663	0.87744	1.31769	0.727712	1.30385	0.870681	1.01537	0.754338
LTR24	2.45159	3.10949	2.20745		7.11493	5.41143	6.56736	4.6213	7.17509	5.82105	5.63259	6.10334
LTR24B	1.82565	2.52259	2.03315		4.69855	6.0749	6.67991	3.25561	6.88605	5.04407	7.39327	6.45291
LTR24C	0.469453	0.497467	0.636585		1.97177	0.642737	2.19899	1.2568	2.85515	1.59454	1.69125	1.26915
LTR25	1.40836	1.45966	1.12419		2.28495	2.62486	3.38668	1.96824	4.5869	2.32159	2.75764	2.3236
LTR25-int	3.28617	4.77857	3.54726		8.00899	5.86467	9.25828	6.18587	10.7245	8.05637	8.99972	7.25965
LTR26	0.956294	1.51056	1.45098		4.51582	4.16701	4.47275	4.25071	7.94325	4.62741	4.5125	3.92358
LTR26B	0.712874	0	0.671982		1.24989	0.933005	1.41629	0.567836	1.40106	0.643941	1.39697	1.55592
LTR26C	0	0.626807	0.417716		1.20257	1.84528	2.92013	1.95953	5.24705	2.45747	2.17513	1.63242
LTR26D	1.09539	0.919394	1.12947		1.34141	1.51354	2.92066	1.45879	2.46518	2.43376	2.47475	1.99251
LTR26E	0	0.625624	0		1.06574	0.684204	0.996748	0.64008	1.93736	0.78592	0.830345	0.955083
LTR27	0.643325	0.897208	0.62891		1.01033	1.59648	2.56085	1.49094	4.53363	1.94926	2.26709	1.55244
LTR2752	0	1.08693	0.636584		1.56107	1.92821	1.38188	1.55789	3.25678	2.05451	2.56499	1.96607
LTR27B	4.36418	4.02966	4.15775		5.2499	4.91383	3.90152	3.60052	3.53882	2.78895	2.67423	3.082
LTR27C	0	0.474396	0		0.672196	1.01594	0.880004	0.85795	1.35214	0.761145	0.882174	0.739404
LTR27D	0	0.518274	0		0.747409	0.780822	1.46738	1.07566	2.60154	0.627154	1.8315	1.00026
LTR27E	1.13017	1.94987	1.17474		1.93969	2.50875	2.12954	1.37428	4.15673	1.21306	2.10262	1.51378
LTR28	0	0	0		0.411684	0.60127	1.05919	0.971725	1.91679	1.47957	1.44782	0.884098
LTR28B	0	0.788038	0.421714		1.50552	2.05261	2.19234	1.40803	3.72894	1.539	2.09592	1.72333
LTR28C	1.44313	1.85366	1.98259		2.38646	2.27363	2.70455	2.19032	4.51996	2.38766	2.50529	2.67763
LTR29	4.51997	2.40026	2.23009		5.76601	3.0105	13.7125	18.9502	29.1182	8.59522	25.8322	12.4226
LTR2B	6.29172	7.45943	6.92019		10.0324	9.56476	6.63909	3.92919	7.2543	5.03896	5.45019	4.83385
LTR2C	5.60562	7.76919	6.45633		8.20213	7.12941	8.22547	6.37339	8.75119	5.60957	5.8902	5.75633
LTR3	0.678099	0.737375	0.970098		1.17346	0.808605	0.546269	0.519603	0.522247	0.587089	0.774256	0.809827
LTR30	0	0.598833	0.429374		0.659294	1.20254	0.960421	0.860532	2.77488	2.50852	1.56824	1.1091
LTR31	1.58223	2.39683	2.61926		5.35777	3.00635	4.05289	2.49065	5.2532	1.59432	3.3831	2.79468
LTR32	2.13862	4.2988	3.08204		6.79352	7.77505	9.49048	6.23482	10.6251	5.58791	9.18148	7.70096
LTR33	25.2284	49.7102	39.5997		67.1481	63.7728	76.2321	53.7328	94.9254	48.8524	68.1663	59.1686
LTR33A	2.83411	6.05177	3.92401		7.34066	6.78025	10.121	7.71474	19.4578	6.32542	9.2716	8.21215
LTR33A_	2.5733	5.75457	4.12693		8.8864	7.8924	9.78135	5.95282	13.3208	7.62248	9.6228	7.49634
LTR33B	1.83678	3.89746	2.79092		5.75592	5.33886	6.38852	4.81057	7.1518	4.31235	6.3818	5.45263
LTR33C	5.8247	7.08921	5.19689		7.03382	3.73202	6.09386	3.88612	7.64213	3.82773	5.85109	5.37794
LTR34	0.643325	1.86916	1.29773		3.26247	2.50875	2.48955	2.34247	3.39319	2.52119	2.91157	3.25642
LTR35	0.539002	0.932317	0.937884		2.3248	1.32694	1.17053	0.941713	2.56146	0.92233	0.969658	1.32623
LTR35A	0	0	0		0.433255	0	0.807464	0	1.01072	0	0	0
LTR35B	0.573776	0.578195	0.56238		0.974387	1.09887	1.3602	1.08871	2.26039	0.696257	1.60373	1.23696
LTR36	0	1.43684	1.06081		2.3218	2.38393	4.63078	3.07929	7.65917	3.42297	4.79014	4.44605
LTR37-int	3.94689	4.87009	3.23735		7.75413	6.24036	9.28908	8.90905	6.58022	10.5804	9.78994	8.67128
LTR37A	3.70347	4.63538	3.31089		7.86316	5.45248	10.7201	9.70182	11.4409	10.5736	10.1524	9.21765
LTR37B	2.24294	3.89717	3.20633		5.48122	4.52653	5.95735	5.86453	8.05696	6.60771	6.74644	5.02688
LTR38	0	0.416356	0.568489		0.767099	0.60127	1.03552	1.38208	3.28022	0.811019	2.17804	1.7743
LTR38-int	0	0	0		0	0	0.595737	0	0.723598	0.403418	0	0
LTR38A1	0.747648	0.714401	0.736536		1.44049	1.38914	1.1656	0.718875	1.38051	0	0.807657	1.05562
LTR38B	0.92152	1.40237	0.978245		1.91966	1.96968	3.13762	2.51847	3.4821	2.90671	2.34008	2.20942
LTR38C	1.61701	2.00331	1.79451		3.15806	3.83569	5.19921	3.73431	2.42082	5.39854	4.03587	3.10467
LTR39	3.14708	5.60984	4.06736		7.74395	7.31891	11.5338	8.46898	14.7811	6.73257	10.1206	9.31777
LTR39-int	0	0	0		0	0	0.527689	0	0.854455	0	0.485678	0.467477
LTR3A	0.686793	1.08502	1.25367		2.58754	1.78308	2.06304	1.2753	2.51404	0.597143	1.6493	1.91628
LTR3B	0.469453	0.507122	0.561969		0.874957	1.05741	1.38922	1.82664	1.07993	1.44352	1.28267	1.94116
LTR3B_	0.469453	0.700688	0.475643		0.95896	0.974472	1.14582	0.609651	1.43075	0.934871	1.16405	1.14848
LTR4	0	0	0		0.432684	0.559803	0.686018	0.452304	0.786439	0.405459	0.423433	0.586197
LTR40A1	0.747648	0.858498	0.519004		1.11714	1.05741	1.36623	0.962372	2.38256	1.41654	1.21088	1.02497
LTR40a	5.30274	7.83675	5.79658		10.3749	6.77984	10.2538	8.53433	12.9799	7.77826	10.3808	9.68177
LTR40b	4.69453	7.01222	4.79153		7.73546	5.8261	7.59641	5.34629	6.56003	5.1299	6.9196	5.97932
LTR40c	1.7561	3.26291	2.90751		6.12526	4.58209	4.89172	3.63985	5.98384	3.4342	5.50335	5.26228
LTR41	4.66011	8.67884	6.0551		13.1874	11.5639	13.2986	10.9527	15.7134	8.71895	14.3716	12.6772
LTR41B	6.97225	7.92789	6.43392		11.2851	8.08605	10.1209	7.56134	12.1872	8.98441	8.13506	8.26306
LTR41C	1.96475	3.73592	2.93603		4.19247	4.00819	6.5593	5.1445	10.3881	4.63091	8.31435	7.23936
LTR42	5.75515	7.85284	6.45242		7.01664	6.86277	7.41452	5.97106	7.15637	7.17589	7.05443	6.84615
LTR43	1.37359	2.73114	2.93227		7.65131	6.30961	7.00375	5.21605	8.49599	7.41872	6.32755	6.79065
LTR43-int	0.469453	0	0		1.01834	1.22327	1.0334	0.750895	1.20725	0.582263	1.59523	1.16588
LTR43B	0	0.464863	0		1.25867	0.518336	1.4918	1.03813	2.01683	1.08152	1.17359	1.14462
LTR44	1.02584	2.29861	1.3337		2.32161	2.38435	1.81739	1.30275	2.24745	1.90029	1.09847	1.32513
LTR45	0.539002	0.497868	0.43446		0.705474	1.47208	1.00371	0	1.54786	0.879643	0.968129	0.817643
LTR45B	1.33881	2.88357	1.90204		3.17144	3.62835	3.50725	2.61301	4.8433	1.81067	3.03127	3.06907
LTR45C	1.88338	2.98067	2.59149		5.00077	5.36996	6.05225	3.67815	6.18866	6.24859	5.00813	3.77471
LTR46	3.99105	5.08063	4.61597		6.27113	3.47783	4.20531	2.9246	6.64426	2.41127	3.17837	4.06575
LTR46-int	0.476408	1.40742	1.10123		3.0702	5.87586	3.01413	1.39974	3.50678	2.86212	2.07053	1.75577
LTR47A	2.79933	3.72842	2.6296		5.47797	3.58647	5.48915	3.13258	8.38807	2.71386	4.3172	3.19137
LTR47A2	1.23449	4.23878	2.08489		3.22907	2.21848	2.22414	1.22565	1.74604	1.52693	1.71876	1.53923
LTR47B	0	0	0		0	0	0	0	0	0	0	0
LTR47B2	3.06014	4.30381	3.56197		5.43185	6.32992	7.42517	6.37961	7.93057	9.24311	9.17286	7.56341
LTR47B3	0	0.41981	0.417634		1.74359	1.55501	1.35305	0.44234	2.09316	0.897611	1.11685	0.836781
LTR47B4	0	0.482452	0.560908		1.49792	1.51354	2.07892	1.57004	1.47853	1.24945	1.42051	1.83661
LTR48	4.25985	5.22392	4.37947		7.15767	5.45248	7.6242	5.02428	14.5597	5.17282	5.92518	6.04893
LTR48B	4.24247	4.96391	3.05864		9.25729	14.5756	29.9805	40.3483	40.5553	62.0216	43.2914	42.8817
LTR49	3.28583	4.24123	3.21194		7.03965	5.68055	8.5676	5.97189	10.1913	5.67105	7.26986	6.9175
LTR49-int	5.9012	9.96208	8.13147		14.8922	12.834	15.438	13.6232	21.1631	14.865	16.0416	13.2775
LTR5	0	0	0		0	0.409278	1.1538	1.04333	2.48118	0	0.846345	0.681725
LTR50	6.9027	10.0435	9.00683		21.1262	23.2837	27.2256	19.7533	30.3669	19.8069	24.4668	24.4221
LTR51	2.34727	2.48357	2.04307		4.87048	3.29662	4.57979	2.99966	5.22073	3.79702	3.78806	3.03555
LTR52	3.42527	4.55593	3.68949		5.62087	3.75276	5.77009	5.18384	8.38454	4.60265	4.81316	5.17213
LTR52-int	3.18185	3.49252	2.57293		4.62308	5.49437	4.85313	3.58079	6.10223	2.48753	5.20234	4.37517
LTR53	3.32095	7.85152	5.39677		8.21742	7.27703	6.23941	4.02982	8.41419	6.14668	7.51021	6.50364
LTR53-int	7.66774	13.0614	8.30317		10.1329	7.40184	8.78818	8.55566	6.70269	10.3833	9.25397	11.8104
LTR53B	0.434679	0.563069	0.408008		1.24491	2.25995	1.60626	1.00388	1.09177	0.959158	1.32545	1.26351
LTR54	2.5733	4.33676	3.07487		6.78674	6.0749	8.4035	7.26717	10.4708	7.14905	7.01456	6.1499
LTR54B	1.42575	2.35934	1.91929		3.61967	3.00635	4.21822	2.89793	5.08768	3.62652	4.34939	3.12126
LTR55	0.747648	1.3631	0.991538		2.80783	2.01115	2.50891	1.57684	7.20429	1.59792	2.56609	2.29754
LTR56	3.80779	6.94996	5.40641		7.59237	5.61877	8.38358	6.52942	8.80053	6.23951	6.63653	6.3544
LTR57	0.539002	1.11898	0.959353		1.54895	0.642737	1.46093	0.519128	1.28556	1.35177	1.07288	0.937746
LTR57-int	24.6028	19.1527	14.9569		9.94794	4.25036	4.48019	10.057	3.55877	7.86903	6.38399	9.43708
LTR58	0	0	0		0	0.518336	0.617371	0.472468	1.0315	0.648065	0.62591	0.507633
LTR59	0	0	0		0	0	0	0	0.811715	0	0	0
LTR5A	31.8272	41.4373	42.0987		65.6077	48.6204	58.3671	40.1524	54.0379	44.8939	47.7908	49.5096
LTR5B	14.215	17.7881	13.7531		34.3703	24.8565	29.4252	19.4499	31.7305	23.2818	25.0057	30.8588
LTR5_Hs	32.1221	38.878	36.2618		48.9582	44.0238	47.9628	39.2096	48.0056	45.8287	50.7457	47.3709
LTR60	0	0	0		0	0.518336	0	0	0	0	0	0
LTR60B	0.944818	1.36737	1.1806		2.62118	1.38914	1.93784	1.60006	1.67486	0.96898	1.85729	1.81795
LTR61	2.76421	3.41227	2.40483		5.02267	3.08928	6.01785	3.44806	4.44301	5.2998	5.23812	6.20493
LTR62	2.9732	2.68844	2.62166		5.84523	4.70649	3.73203	2.3395	4.89013	3.00866	3.89267	3.40298
LTR64	2.66024	4.25928	3.51574		4.02774	3.08928	3.60976	2.62171	3.27533	3.24515	4.0729	3.77624
LTR65	1.40836	2.32611	1.72214		4.21975	2.63315	4.23619	2.57598	5.53553	3.78851	4.28677	3.74851
LTR66	0.793898	0.748045	0.856844		1.52447	2.67462	3.55364	2.32802	2.81953	2.7706	3.02713	2.60456
LTR67B	14.8657	19.9294	16.4313		28.409	20.9201	25.0961	20.8308	29.1799	14.7729	25.5135	23.9941
LTR68	1.8952	3.28062	2.31914		2.6518	1.84528	2.11564	1.48269	2.04663	1.40221	2.31403	1.91146
LTR69	0	0.503672	0		0.442242	0.600856	0.832815	0.501517	1.22949	0	0.709526	0.708436
LTR6A	3.48161	6.41527	4.70879		9.60075	18.6332	32.1871	22.1552	34.0835	32.5368	26.7076	29.5631
LTR6B	0.710092	0.98685	0.658255		1.69431	2.52036	2.33216	1.20058	4.16364	1.99391	2.13281	1.8142
LTR7	1.89694	2.90669	2.0523		6.27719	6.73132	9.46114	5.63175	20.3038	6.55375	5.64163	6.34261
LTR70	6.79838	6.91222	5.49112		5.36267	4.41623	4.59811	3.03674	3.33052	2.74076	3.0619	2.56312
LTR71A	1.33881	1.91791	1.84548		3.36302	2.05261	2.48276	1.847	2.17442	2.0973	1.80697	2.25974
LTR71B	1.13017	1.53473	1.63323		6.56926	8.52104	4.04997	1.85163	5.4086	3.15441	3.96092	3.74358
LTR72	1.7561	2.09227	1.47018		4.58906	4.9553	6.20954	4.50228	7.11191	4.96984	7.11911	6.12208
LTR72B	0.678099	0.963315	1.07364		2.53106	1.63794	1.49312	1.32035	1.63982	2.021	2.00485	1.87628
LTR73	0	0.757239	0.696755		2.14498	1.38914	2.70662	1.68324	3.12102	1.52104	2.4029	1.95426
LTR75	2.9732	3.59456	3.32467		6.44444	4.87236	4.79831	2.66911	4.74367	2.67703	4.48988	4.06382
LTR75B	0.747648	2.22007	1.82712		3.31468	2.05261	2.1964	1.45236	1.50517	0.874418	1.81898	1.35775
LTR75_1	0.782422	1.24967	1.0514		1.64887	1.38914	1.77611	2.19572	4.10207	3.03363	3.1879	2.60638
LTR76	13.8923	18.4174	16.9487		15.1684	14.3683	17.8514	10.5869	15.8291	11.0587	16.7677	12.5164
LTR77	3.66904	4.0408	3.67628		3.77089	2.30183	2.21656	2.48205	1.6003	1.62249	2.6219	1.90688
LTR78	9.04132	14.9285	12.4061		21.1453	17.9543	25.2635	22.0201	35.7241	22.5861	26.9923	22.3614
LTR78B	3.46004	6.27537	4.77308		9.69153	9.22639	12.8667	11.794	20.0566	10.5322	14.4088	12.4243
LTR79	13.6399	23.1742	16.6603		26.6309	22.4543	29.7418	23.1536	33.5218	27.3766	33.8294	26.9666
LTR7B	4.08251	6.89075	6.5086		18.0706	18.3645	20.561	10.5359	33.1158	14.8722	10.8588	11.1032
LTR7C	2.03951	2.56945	1.68843		4.97196	5.40811	7.03033	4.50908	11.561	8.94166	6.8505	6.66958
LTR7Y	0	0	0		1.03248	0.872049	2.27651	1.09465	2.95788	2.5598	1.69803	1.36094
LTR8	17.0019	18.2926	15.6626		35.8554	29.5725	37.8404	24.7567	47.1233	29.3346	35.0463	29.3392
LTR80A	0	0.85481	0.768307		1.14215	1.01552	1.32205	0.970961	1.4785	0.820332	0.999693	0.97605
LTR80B	0.469453	0.952869	0.924627		1.83101	1.26433	2.34613	2.01138	2.38987	1.36248	2.54452	2.37604
LTR81	0	0.581783	0.579672		0.918732	1.26474	0.78828	1.18197	1.20658	1.43984	1.36429	1.20397
LTR81A	2.83411	2.61767	2.11068		3.18095	2.71608	3.80687	2.86353	5.30748	2.97785	3.04336	2.86292
LTR81AB	0	0	0		0	0	0.660465	0.68983	0.975129	0	0.434396	0.45892
LTR81B	11.8407	13.1045	13.9231		15.2663	10.5948	14.8386	10.2463	12.263	9.54268	12.0212	10.5979
LTR81C	0.886745	1.40507	0.906668		1.91014	1.67941	2.30884	2.31916	3.15486	2.07846	2.84482	2.0498
LTR82A	3.56437	4.36167	2.7281		5.10853	4.8309	6.50985	4.65018	6.60523	9.53398	6.42962	6.93171
LTR82B	8.1198	2.7632	2.13757		6.20578	4.16742	6.54203	5.66123	10.8645	7.38934	6.79038	6.05498
LTR83	2.34727	2.6958	2.06404		3.77107	3.62835	3.82902	3.92487	4.25618	5.15371	4.87374	4.58845
LTR84a	3.73824	6.81381	4.44766		6.2555	4.62356	4.62571	4.76976	5.17152	4.10678	4.80734	5.05221
LTR84b	2.52114	5.89796	3.81007		7.2051	7.19451	8.0754	5.912	7.75924	4.84137	7.53935	6.39792
LTR85a	5.26831	6.15375	3.94632		6.54778	4.12596	7.13958	6.06028	10.0444	6.61653	7.16918	5.9742
LTR85b	1.28074	3.24667	2.50457		4.68647	4.49916	5.56679	3.55662	6.85562	4.25094	4.51607	4.13545
LTR85c	1.8952	2.72002	1.98512		3.34916	2.42581	5.06564	3.79799	8.24611	4.49051	5.15363	4.11885
LTR86A1	1.65178	2.38706	1.78431		3.51849	1.84528	3.19143	2.43274	4.34104	1.99883	3.07592	2.82083
LTR86A2	0.67497	0.900646	0.789263		1.93317	1.49903	2.04875	1.36749	3.48197	1.83078	1.84607	1.96663
LTR86B1	0.643325	0.815685	0.55966		1.63126	1.88674	2.70512	1.35151	3.55397	1.33268	1.80258	1.63939
LTR86B2	0	0.784624	0.497403		0.880173	0.642737	1.22731	1.38213	1.24753	0.65754	1.25979	1.24353
LTR86C	1.16494	1.04963	1.18858		1.02559	0.850072	1.30151	1.24273	1.58012	0.692074	1.3099	1.08511
LTR87	5.15773	8.64972	5.62147		11.0962	8.2515	9.51161	6.79934	12.4339	9.54144	9.15936	8.80825
LTR88a	2.9732	3.19317	2.89676		4.05727	2.88195	3.85715	4.29241	5.77442	4.41197	5.05778	5.15367
LTR88b	2.28328	3.93946	2.7968		4.56788	3.50395	5.86267	4.55692	6.88716	4.26094	4.5703	4.01784
LTR88c	1.99952	1.79371	1.4266		2.59931	2.59168	3.17346	2.44877	4.02347	2.09012	2.63407	2.11653
LTR89	3.3905	5.28767	3.94099		6.24966	4.18816	4.76334	3.8703	6.31611	4.20317	5.08229	3.94631
LTR89B	1.51268	3.20885	2.4502		3.16701	2.53985	3.54591	2.8405	4.03578	2.82429	2.90622	2.41679
LTR8A	9.29587	14.2968	9.81635		14.9155	15.3635	16.4977	15.4829	22.3849	13.6055	16.7786	17.4232
LTR8B	14.3441	12.6808	13.6281		21.6713	12.9169	21.4455	22.3667	26.5077	21.0602	18.9898	21.0392
LTR9	0.765035	1.50151	1.67842		4.11052	4.20889	6.09748	3.40132	6.74841	3.32816	3.73521	3.00665
LTR90A	1.23449	1.23796	0.975776		1.82941	1.30621	2.11935	1.37158	2.23802	1.60677	1.34903	1.42024
LTR90B	0.539002	0.996123	0.700914		1.04802	0.974472	1.51985	1.04602	2.36712	1.67283	1.44884	0.939415
LTR91	1.33881	2.32668	1.71204		3.45539	2.67462	4.06831	2.56378	5.29637	4.59715	3.44095	3.08952
LTR91A	2.24294	5.44548	5.05622		11.1931	7.60918	10.933	9.11658	9.11459	9.71208	8.58782	7.61129
LTR9A1	1.79088	2.32976	2.23248		4.71298	3.66982	5.04948	2.99678	6.61403	3.90566	4.92663	4.10015
LTR9B	1.46052	1.49585	1.45798		3.51739	3.83569	5.93152	3.95247	8.9306	3.70575	4.09912	3.42766
LTR9C	0	0	0		0	0	0.596931	0	0.705579	0.487442	0	0
LTR9D	6.86793	8.77719	7.71324		9.30435	6.69649	7.96143	6.15817	10.9386	5.93405	7.80823	7.0109
Looper	2.13827	3.16155	2.26176		4.83464	2.55104	4.25511	5.22681	6.9155	4.10114	4.40993	3.44677
MADE1	5.9638	10.2426	6.15044		9.45343	7.60876	8.326	9.13587	11.9498	11.0326	10.5683	9.45383
MADE2	2.79933	4.39682	2.94106		6.34071	5.5773	6.25989	5.60274	7.66669	5.80484	7.09464	6.40214
MARE10	0	0.456688	0		0.436759	0	0.600882	0.479011	0.686965	0	0.550537	0
MARE4	1.44313	1.26576	1.22355		1.249	0.850072	1.18907	1.48295	1.14583	0.859933	1.25604	1.11776
MARE6	0	0.984411	0.434359		0.710681	1.09887	1.03339	0.714834	1.4352	0.885424	0.957489	0.903441
MARE8	0	0.597195	0		0.449627	0.704937	1.06484	0.780867	1.08185	0	0.959212	0.865593
MARNA	21.34	24.9817	17.1587		26.4068	17.8515	27.5894	24.3712	25.667	25.0894	27.194	23.0372
MER101	4.31202	6.63665	5.47821		6.43046	5.24515	3.30665	2.69121	2.58604	2.33982	2.67993	2.61591
MER101-int	35.0108	33.7376	23.6681		29.0913	13.2408	26.0893	27.0996	17.7796	25.7171	22.5467	24.1146
MER101B	0	0	0		0.615659	0.559803	0.687963	0.528569	0.969806	0.424455	0.717397	0.439801
MER102a	5.85878	12.6273	9.61403		20.5697	16.3027	19.863	16.8171	25.4478	12.5025	20.8394	16.691
MER102b	7.89655	15.4048	11.6746		21.865	19.7175	28.3461	22.8192	33.6552	20.6395	25.2692	24.7316
MER102c	10.6096	15.2159	9.34151		20.5158	19.3344	21.0876	15.9081	24.293	13.0072	18.3049	14.8451
MER103C	36.9126	46.7825	34.6914		52.0282	40.4543	61.2564	54.4146	77.1985	59.1197	61.0983	50.0815
MER104	13.2316	13.2431	8.50194		11.1467	7.31891	12.5039	12.4348	13.5367	15.7769	14.2347	11.559
MER105	1.99952	3.81078	2.58238		4.94869	3.37955	4.80925	3.94293	5.77798	3.2824	5.00482	4.28696
MER106A	1.09539	2.39613	1.45114		2.47536	2.13555	3.56627	2.93283	3.88829	4.0898	2.93137	2.72114
MER106B	3.63392	5.43843	3.60417		6.99355	4.08408	7.92599	4.93092	7.88683	5.98179	6.32443	4.76924
MER107	0.747648	1.36647	1.01374		2.31289	2.01115	2.04476	1.49997	2.49896	0.895583	1.97611	1.64705
MER110	1.23449	1.61207	1.09534		2.63848	2.25995	2.43531	2.56589	4.61335	3.21446	3.05903	2.65787
MER110-int	0.99072	1.8458	1.31582		1.97754	0.974472	3.45162	3.57313	3.22232	2.81002	3.41854	2.72407
MER110A	0.712874	1.48009	1.38693		2.51299	2.42581	2.52153	2.74024	5.83034	2.73398	4.04571	2.74246
MER112	19.9702	25.012	16.8272		29.9472	16.8551	32.0774	27.1074	31.9749	39.2035	33.2169	27.3528
MER113	6.62451	12.8385	8.26356		20.7897	15.405	23.6363	20.9736	29.9193	17.6476	24.242	20.5934
MER113A	4.57282	10.4981	6.99918		9.80001	7.13231	11.0996	9.27732	10.8666	9.8284	10.2455	8.6441
MER115	5.12921	11.0161	7.73426		13.5532	13.0824	15.0499	13.0025	23.7739	12.4891	17.0483	13.7433
MER117	6.26494	12.7272	9.09373		22.6227	17.2643	20.5728	14.2175	27.7623	13.4866	20.7439	17.5496
MER119	3.94689	5.52131	3.93499		8.07012	6.4481	8.46224	5.64672	9.97467	6.22332	8.22665	5.50215
MER11A	8.40739	17.8474	12.8104		23.6234	16.5826	25.761	16.6853	27.5005	26.9089	24.1108	20.3097
MER11B	7.20002	10.5469	7.99456		12.9509	10.2083	16.121	14.446	18.4886	20.3206	17.4135	16.0796
MER11C	18.6067	27.6347	21.9588		39.4422	30.6503	38.9907	30.9387	37.4495	35.4166	36.045	32.8668
MER11D	9.49826	9.44726	8.56657		10.5979	7.10536	9.60923	7.41113	7.4403	12.107	8.98849	9.4558
MER121	1.54746	3.30132	1.49531		2.01127	1.47208	2.78655	1.98003	3.57375	2.2488	2.68338	2.08046
MER121B	0	0	0		0	0	0	0	0	0.426123	0	0
MER123	0	0	0		0	0	0	0	0	0	0	0
MER124	0.851971	1.76033	1.10089		2.78544	1.09887	2.81225	2.11329	2.66194	3.4814	2.92283	2.02956
MER125	0	0	0		0	0	0	0	0.493886	0	0	0
MER126	0	0.486141	0		0.592122	0.559803	1.06155	0.724298	0.705647	0.791544	0.797778	0.641136
MER127	0	0	0		0.71085	0	0.966989	0	1.60635	0.717657	0.739273	0
MER129	0	0.445738	0		0	0.559803	0.584157	0	0.877877	0.504703	0.531034	0.48776
MER130	0	0	0		0	0.684204	0.457549	0	0.477156	0.808375	0.763557	0.581749
MER131	8.35418	9.86499	7.02825		12.8168	9.86705	11.4001	11.5375	6.14372	10.3353	10.5918	8.32598
MER132	0	0	0		0	0	0	0	0	0	0	0
MER133A	0	0	0		0.574183	0	0	0.785992	0	0.527373	0.585735	0.427964
MER133B	0	0	0		0	0	0	0	0	0	0	0
MER134	0	0	0		0	0	0	0	0.459536	0	0	0
MER135	0.886745	1.08169	0.724771		1.38572	1.63794	1.60036	1.87294	2.3477	1.55938	2.4298	1.84427
MER136	0	0	0		0	0	0	0	0	0	0	0
MER1A	22.0567	31.0863	27.51		51.6841	40.6695	49.8165	30.0011	53.2727	28.5	42.0434	38.6745
MER1B	22.1057	42.8882	34.6701		74.7609	76.4554	66.2497	44.3805	76.535	35.1332	58.2735	52.8995
MER2	43.2412	64.4484	51.4096		79.4436	40.9664	70.8278	54.2151	65.1838	61.2383	64.5866	51.007
MER20	53.8818	91.1681	70.7447		138.625	120.764	137.463	113.9	161.968	96.2237	122.035	111.875
MER20B	7.45874	13.7527	10.3537		22.4712	15.0313	21.804	18.77	26.5377	15.6958	22.7937	18.0946
MER21-int	4.01609	5.22341	3.69975		7.37564	5.90862	10.2796	6.51615	13.7851	6.85976	9.338	7.97353
MER21A	10.1715	15.3716	11.064		25.0594	23.3334	25.4125	17.9206	34.3392	14.5845	27.8274	24.0802
MER21B	15.7882	24.4137	19.8769		39.8431	41.1352	47.8706	29.8571	60.2235	29.2909	41.392	31.8602
MER21C	105.909	102.927	82.8654		79.0941	139.724	230.069	162.737	336.6	159.169	286.966	216.906
MER2B	2.91235	6.27234	4.9779		10.5349	8.24155	11.5862	10.8043	10.1206	11.6355	10.0795	8.73013
MER3	22.4764	36.676	27.3412		52.4105	35.2995	53.2792	43.6955	57.1373	37.5911	51.8691	45.8945
MER30	13.3519	18.0418	11.8288		23.8344	17.5198	24.7877	17.2401	32.1774	19.2451	23.2788	18.2
MER30B	0.932995	1.08893	0.850771		1.21036	0.615369	1.0935	1.11445	1.86262	0.918397	1.24046	0.771591
MER31-int	9.4847	14.6492	10.15		16.1021	11.2379	18.8275	17.0123	16.6976	17.827	16.2367	16.5123
MER31A	6.20687	9.12781	7.87079		15.9458	9.76546	21.2028	14.7539	27.1479	12.2457	14.0777	13.1478
MER31B	3.07753	6.55021	4.57758		9.91129	10.0138	16.2831	9.77446	32.528	11.945	12.677	12.1231
MER33	24.4463	30.8478	25.2687		48.2637	37.8779	55.4842	44.1195	56.4731	43.1402	52.4504	42.3849
MER34	7.0418	6.40775	5.22428		9.72736	8.27306	12.057	8.21594	11.849	7.93289	8.40444	7.40365
MER34-int	2.71935	3.72277	3.39663		7.22209	4.77491	7.69872	18.6264	6.4095	11.9609	12.0811	14.3619
MER34A	3.7671	4.26038	3.55521		5.71564	5.87586	9.34729	6.14807	14.57	10.228	8.61238	7.15523
MER34A1	2.69501	2.83463	2.3591		4.08123	3.83527	7.01	4.48746	7.95415	6.43961	5.94438	6.06562
MER34B	2.64841	4.06386	3.97532		5.6198	4.61527	4.65308	3.95781	5.44058	4.91733	4.75962	3.70738
MER34B-int	30.9613	34.8695	29.0816		28.8594	19.9974	30.945	42.6897	16.2514	68.3053	35.6412	30.3378
MER34C	0	0.482774	0		0	0	1.07598	0.514787	1.21696	1.00267	0.609972	0.615514
MER34C2	2.38204	3.22837	2.52984		6.94952	8.89465	9.22832	7.58924	10.9763	5.63683	6.51494	5.9709
MER34C_	7.54951	11.2472	9.23875		12.1207	5.8261	11.759	7.68084	8.83852	8.42253	10.4629	10.2943
MER34D	0.712874	0.941087	0.846517		1.31542	0.850072	1.35731	1.56376	2.2704	1.21159	1.45923	1.29889
MER39	6.83315	11.1568	9.61642		19.9868	13.3727	24.1742	18.5698	29.0303	18.812	21.0404	19.4364
MER39B	11.319	12.8922	10.0313		13.9187	11.9632	19.8872	12.9049	22.5648	13.2572	17.1344	13.7977
MER4-int	7.2501	11.9937	9.09922		18.0527	13.8993	20.7823	18.6724	26.8951	22.4807	20.7879	18.3935
MER41-int	29.0366	41.1858	29.8907		41.3489	26.6653	35.9816	34.3108	28.239	28.6964	34.7114	33.1651
MER41A	13.3005	17.3656	14.8088		26.2325	30.7415	32.7064	20.911	37.146	22.1475	27.0757	24.5966
MER41B	10.2904	13.5524	11.3953		24.6846	19.3447	29.4531	20.7202	29.7022	20.6183	24.5106	22.2407
MER41C	1.33881	2.68428	2.33632		5.12698	4.12596	6.29457	5.49681	7.10828	4.71767	5.42947	4.84145
MER41D	1.02584	1.27614	1.14498		3.08822	2.21848	3.60328	3.29639	4.20861	6.61848	4.36224	3.54676
MER41E	9.80914	8.14968	7.23081		8.32152	4.95447	5.79175	3.43403	5.94534	5.29526	5.44535	4.3914
MER41G	3.00798	4.30253	3.77281		3.66658	3.33809	4.21754	3.37121	2.80305	1.56938	2.65497	2.80975
MER44A	14.1354	19.7965	14.9563		19.3254	14.8659	28.9895	21.8503	28.0972	43.1477	26.1503	22.768
MER44B	4.45702	10.1777	7.66874		17.5471	10.8021	17.3576	12.9618	17.9931	16.0557	16.3558	14.6815
MER44C	5.51138	10.1376	7.13389		20.5788	13.0413	18.4755	13.8346	17.1583	12.7849	16.3498	14.437
MER44D	2.41647	2.46221	2.18363		6.54897	4.29183	8.783	5.17048	7.84606	5.33928	6.55246	5.59167
MER45A	6.48541	10.4249	9.14563		14.7985	12.2954	16.3113	13.0857	18.4561	10.2004	14.5199	12.156
MER45B	2.66024	2.93819	2.48126		6.86807	5.3285	8.0175	6.59048	6.3485	6.41121	8.31211	6.37454
MER45C	0.730261	1.19432	0.757606		3.18048	2.75755	3.68776	2.83818	6.28815	2.9997	3.89764	3.25117
MER45R	1.09539	1.34638	1.20345		2.90038	2.38435	3.69959	2.66518	2.4202	2.36118	2.72012	2.3437
MER46C	11.7711	16.5379	11.7252		18.4745	14.5337	19.8464	16.4343	19.6583	15.1058	20.5754	16.7114
MER47A	10.1019	17.0734	12.9999		24.8882	17.3124	23.1204	18.0124	25.2908	25.0389	24.4989	20.8532
MER47B	4.15553	8.75904	5.99512		6.79442	5.49437	7.69613	5.32786	7.99589	7.25116	7.49888	6.12665
MER47C	2.42864	2.718	1.92845		2.87406	1.65868	2.59303	2.87058	2.52962	3.64888	3.6097	2.78296
MER48	0	0	0.414991		0.538741	0.559803	0.629122	0.869093	1.0539	0.733886	0.913118	0.724892
MER49	20.1896	23.7911	22.43		31.1979	25.3313	24.1393	23.7842	21.824	17.6184	22.9012	23.4771
MER4A	3.56437	6.84426	6.84767		15.3915	11.393	14.8966	12.2555	13.5854	11.4406	12.9355	14.4192
MER4A1	13.6138	18.1132	15.7217		25.608	22.7852	25.1033	17.6378	24.8456	16.1882	20.9665	18.7423
MER4A1_	2.1734	2.46331	2.12009		3.86143	3.47078	4.51871	3.11817	6.11785	2.78215	3.90047	3.94847
MER4B	6.58973	12.4195	9.35076		13.1687	12.0876	17.8564	14.6806	21.3943	17.8938	19.8094	16.533
MER4B-int	3.28617	4.47199	3.32416		6.48415	6.91792	10.6927	8.97188	14.6896	16.5351	11.5406	9.98766
MER4C	1.82565	3.20946	2.64356		6.29046	4.58209	6.45828	5.73281	7.35033	7.36471	6.024	5.94723
MER4CL34	4.81624	7.14635	5.92961		10.8981	9.63069	15.1168	11.0415	15.987	12.7812	12.7931	13.7754
MER4D	4.74669	9.10144	7.38388		15.0025	10.8428	13.5898	9.63847	20.7841	8.64663	10.678	10.0657
MER4D0	1.54746	3.67277	2.88772		5.05823	4.81016	5.4988	4.44209	6.17278	3.24949	3.8156	4.61791
MER4D1	9.16929	13.3096	9.91819		15.5355	14.5868	20.8603	13.0853	24.9403	18.1931	18.4814	15.8811
MER4E	2.46028	3.65146	2.31094		5.11551	5.2041	8.08665	6.07667	9.39151	5.77904	6.47093	5.39122
MER4E1	4.0599	6.12602	4.4637		7.79612	7.27744	9.22055	6.86404	10.6849	7.64677	7.58687	6.8149
MER50	11.7019	20.8017	14.8612		30.3105	32.4611	33.4288	22.5087	36.9302	20.2627	27.4667	28.3685
MER50-int	3.21662	7.6015	5.16224		11.3885	6.65544	8.65496	7.60293	10.8088	8.32594	8.04558	6.15383
MER50B	1.23449	1.85752	1.91814		5.17604	5.3144	5.58472	5.52407	6.27242	4.83641	5.71964	4.84173
MER50C	0.886745	2.37889	2.16899		3.99348	2.42581	2.34415	1.63939	1.7005	0.606252	1.38047	0.776198
MER51-int	4.32906	5.27491	4.07171		5.74226	2.71608	6.36014	4.91162	5.29979	5.25831	6.20558	5.70694
MER51A	16.3092	16.0141	16.8564		24.8851	29.794	32.8111	25.1904	38.5074	16.6754	26.9087	24.1655
MER51B	1.40836	1.91921	1.85871		3.63564	2.30141	2.62591	2.69685	4.17335	2.3068	3.37252	2.69069
MER51C	4.13814	4.51015	4.19138		6.31945	8.52145	5.34644	3.24201	6.14585	3.58609	3.92529	4.11354
MER51D	3.39015	1.47086	1.40803		1.65278	1.30704	1.74033	1.64542	1.4213	1.44154	1.40687	1.38537
MER51E	2.45159	2.36293	2.02234		4.65743	2.09408	3.32457	2.18344	4.41764	2.06717	3.09217	2.33735
MER52-int	0.817197	1.14002	0.791728		2.00538	1.78639	2.30712	2.33343	4.4434	4.80863	3.10864	2.44966
MER52A	9.44123	14.0265	10.95		20.2293	27.4718	21.8764	18.4315	34.9485	17.7128	23.4846	20.5412
MER52C	5.12921	10.2184	6.32564		8.06311	11.7973	7.58428	8.84412	11.1848	4.75137	6.83872	6.33935
MER52D	7.0418	5.81045	6.57278		6.80943	10.7192	5.29421	5.82987	10.3554	4.91058	6.48801	6.26479
MER53	6.34597	9.85775	6.59395		12.6919	9.62406	13.5392	12.3615	16.5106	11.7053	12.7853	12.0944
MER54A	2.41682	5.59346	4.86703		9.0582	8.78269	11.7365	11.6284	16.8536	7.59469	9.20267	12.9816
MER54B	0.712874	1.81083	1.18102		2.28194	1.80381	3.68855	3.14422	5.19162	1.60672	2.60754	2.17481
MER57-int	9.09349	10.2337	7.01494		10.7587	8.67405	16.4113	14.2383	17.5521	15.4597	14.4641	12.5143
MER57A-int	12.5501	13.4709	11.601		16.5623	8.90295	19.2325	13.0262	24.1847	19.776	18.1655	15.2848
MER57A1	2.61677	3.73872	2.67141		6.01665	5.2211	5.93508	3.39864	6.94079	4.31241	4.89764	4.22278
MER57B1	2.66024	3.67429	3.15816		5.61204	5.47363	5.89249	5.40433	7.47632	5.3354	7.01739	5.3394
MER57B2	2.9732	4.45833	3.73105		4.92512	5.36996	5.1398	3.50228	8.10244	3.92724	4.64997	3.68074
MER57C1	3.73824	5.75936	5.46581		5.58251	2.30141	3.2538	4.26092	2.92597	3.56319	4.32902	7.15028
MER57C2	0.469453	0.713107	0.485793		1.19302	1.43061	1.51451	1.17454	2.16828	1.90122	1.66687	1.51424
MER57D	1.7561	2.34673	2.28674		2.75954	2.01115	3.22985	2.04857	3.86406	2.14832	3.51408	2.80467
MER57E1	5.59727	9.16212	7.31439		11.3747	15.9021	10.3425	6.66137	10.8531	7.7884	10.2607	11.0226
MER57E2	0	0	0		0	0	0	0	0.702257	0	0	0
MER57E3	0.678099	1.48896	1.26445		1.5396	1.59648	1.61515	1.06717	1.99741	1.63231	1.81122	1.22601
MER57F	0.521615	0.968256	0.595027		1.37289	1.03667	1.84276	1.72317	2.92611	4.13246	2.88747	2.33269
MER58A	47.661	69.9026	50.7469		86.5495	67.4381	94.6619	78.3533	106.378	72.8211	94.3694	77.3894
MER58B	23.6406	36.081	26.3285		45.1243	34.9578	49.9937	39.2901	54.5586	40.4145	50.5161	43.6196
MER58C	5.4773	10.2546	7.27281		14.622	13.5808	14.2641	14.19	16.9972	11.7435	15.0395	12.2607
MER58D	1.92963	3.46381	2.44114		4.54074	3.00635	7.03731	8.2811	7.22419	9.99339	8.2794	6.99477
MER5A	112.568	191.535	128.785		197.291	174.837	212.326	190.005	225.667	144.106	205.889	185.475
MER5A1	36.6344	57.214	43.5228		81.9664	69.9476	89.7671	76.9269	105.889	64.5837	87.1427	80.1933
MER5B	68.6028	110.886	74.546		123.916	109.259	136.221	121.773	154.714	103.102	134.937	125.324
MER5C	1.42575	1.9308	1.18809		3.67843	2.30141	5.06465	3.17452	6.11183	2.30389	3.76081	2.81811
MER5C1	1.94736	3.39669	2.40041		4.13018	2.90268	4.39242	2.73291	5.68862	2.72845	4.13129	3.71728
MER6	5.05966	5.7564	6.19289		13.7305	6.77984	9.78052	6.49943	11.1556	6.90032	8.93804	6.65134
MER61-int	12.9187	17.6429	16.4764		29.7976	26.098	31.9098	26.6304	29.3616	28.3731	31.5378	30.4712
MER61A	0.573776	0.848753	0.684397		1.42944	1.34767	2.53974	1.9618	3.55546	2.39378	2.81277	2.34909
MER61B	0	0.894352	0.552117		1.80802	2.17701	3.48773	1.81025	6.17762	3.55394	2.48665	2.11771
MER61C	0	0.534843	0		0.933492	0.559803	1.0699	1.16003	4.88641	0.739831	1.42714	1.16081
MER61D	0.747648	0.795456	0.669279		1.25714	1.14034	1.5789	1.37429	1.66128	0.852742	1.47533	1.13238
MER61E	2.62546	4.12847	3.13991		6.00845	4.37476	6.41066	4.34745	3.00395	4.49388	4.2194	4.12842
MER61F	0	0.62672	0		0.641141	0.559803	0.644119	0.544972	0.779814	0	1.11034	1.21891
MER63A	5.12921	8.51476	5.47155		14.0618	12.1498	18.2642	13.593	28.7131	13.2819	16.8944	15.7663
MER63B	4.85102	14.0689	8.18276		13.5988	9.88986	18.5404	11.0767	22.2605	9.88954	12.9173	11.7287
MER63C	4.60447	9.06142	7.01671		12.003	5.92604	10.9936	8.77602	9.53524	9.71756	9.40957	8.81116
MER63D	2.38204	3.23125	2.48513		5.60269	3.52469	4.78376	3.55395	6.98863	4.93436	4.62691	3.88202
MER65-int	15.9086	33.8846	21.9169		17.134	10.2174	15.7108	13.4921	13.8645	30.8048	11.9232	8.52446
MER65A	5.4773	6.55401	5.02307		8.85233	9.51666	13.5564	9.84949	15.4204	11.7968	12.079	11.5948
MER65B	1.02584	1.78424	2.33061		2.07327	1.09887	1.38132	1.13574	1.6114	1.17326	1.09764	1.33012
MER65C	1.61701	2.51168	1.9643		3.2008	2.38435	4.41144	3.09044	6.29826	3.52441	3.63605	2.81852
MER65D	1.65213	1.95513	1.68507		3.72614	4.45728	4.81139	3.46874	5.37301	3.57511	3.94628	4.26168
MER66-int	4.6076	5.06532	4.06171		12.8158	14.6167	12.6782	8.93816	18.5097	13.903	10.7248	10.1002
MER66A	0.504228	0.828497	0.643546		1.8189	1.92821	2.45619	1.76509	3.20863	1.77065	2.1328	1.83987
MER66B	2.86888	3.52408	3.5847		10.7877	10.8846	10.9782	12.2183	11.6399	9.2927	11.9076	12.3465
MER66C	3.77301	5.96354	4.24442		5.84861	3.42102	3.9812	3.84735	2.78887	2.29007	3.41572	3.11151
MER66D	0	0.764292	0		1.40478	0.725671	1.34948	1.24655	2.12389	0.901165	1.56448	1.02503
MER67A	5.25092	5.44596	4.90754		6.80738	7.58844	7.81618	6.28843	11.0439	4.94935	5.74177	5.70676
MER67B	5.85947	8.80013	10.6116		11.2219	9.55812	11.8116	8.10496	13.5738	8.46046	8.45098	9.62465
MER67C	8.67515	13.0339	8.74545		14.2222	7.98238	15.9309	12.4452	14.5871	15.6365	14.4047	12.8098
MER67D	1.77836	2.25309	1.49445		3.93813	2.67503	4.99881	3.40417	8.06366	3.03791	3.59329	3.95602
MER68	15.2833	24.8377	20.1636		38.9783	27.6236	33.4353	27.3038	31.3959	19.1101	31.4223	30.4736
MER68-int	69.7051	84.3659	69.9267		72.834	55.2547	66.9254	56.2317	50.9558	56.4899	69.9519	83.5385
MER68B	0.991068	3.1542	1.84732		6.20977	6.11637	6.28309	4.15873	8.30883	2.4234	6.75109	6.10806
MER68C	0	0	0		1.04663	0.974472	0.733655	0.57523	0.97157	0.507014	1.25778	0.776191
MER6A	5.9638	10.1991	8.7061		18.3392	12.3364	12.4183	8.98187	16.5243	8.69964	12.4164	9.9247
MER6B	0.608551	2.27905	1.65718		3.17688	2.59168	2.55332	2.58366	4.3631	1.83756	3.05137	2.67103
MER6C	0	0.426557	0.548987		0.554396	0	0.481796	0.443419	0.756725	0.460449	0.605697	0.450572
MER70-int	5.7548	5.22081	4.80469		7.45916	5.24515	5.14511	3.03964	4.69942	2.25038	3.71615	3.60299
MER70A	4.08598	6.46904	6.06772		7.02504	4.39549	4.35863	1.9803	5.42135	2.6469	3.90266	2.22842
MER70B	0	0.780466	0		1.01732	1.86601	1.81206	1.0811	2.92451	0.802147	1.55945	1.38982
MER70C	0.92152	1.80842	1.41589		2.30472	2.63315	2.72053	1.87606	2.81954	2.28513	2.05669	2.37555
MER72	11.9106	19.215	15.3778		19.9262	12.6648	18.2976	13.7622	17.5176	10.7547	15.2529	16.4365
MER72B	0	0	0		0.72495	0.518336	0.813761	0.897025	2.16564	0.459899	0.782833	0.687028
MER73	0.886745	1.05564	0.956125		1.78698	1.18181	1.96779	1.43266	4.44411	1.33773	1.78992	1.51855
MER74A	8.50232	13.7449	11.5954		21.2327	24.0923	25.1365	17.0133	37.1535	12.8732	17.2812	15.3416
MER74B	8.4672	10.7672	10.6175		15.5498	13.456	12.7131	8.62608	17.2045	8.98428	10.1275	9.00701
MER74C	1.54746	2.71656	1.8633		2.82328	1.51354	2.21513	1.32724	1.83373	1.47566	1.56629	1.15182
MER75	1.42575	1.98462	1.64131		4.11794	1.72088	2.73568	2.4422	2.39326	2.23678	2.91879	2.58065
MER75A	0	0	0		0	0	0	0	0	0	0	0
MER75B	0	0	0		0	0	0.499578	0	0.486721	0.656941	0.503893	0.525324
MER76	2.0343	2.06894	2.24593		3.47646	2.88195	3.23423	2.6494	5.68409	1.37939	3.2942	2.86374
MER76-int	0.817197	1.42516	1.38335		1.87894	1.55501	1.46015	1.15694	2.27685	0.790475	1.52435	1.73378
MER77	16.6127	23.7759	19.1743		34.619	27.2715	33.7504	29.6453	29.2289	19.8692	30.8572	25.2538
MER77B	3.94654	7.52426	5.32944		10.2223	8.27265	10.4405	8.33098	14.2995	9.55693	11.3822	9.55341
MER8	7.12317	13.7367	9.22405		13.3665	10.6918	14.2671	12.4546	15.4413	12.2421	16.1575	13.6379
MER81	4.22508	7.43758	4.93782		11.1733	10.9265	13.1014	9.93648	14.9185	7.94972	12.0627	10.342
MER83	2.31249	3.57317	3.6028		8.47282	8.23118	8.45516	5.85698	9.49803	7.35711	6.51973	7.6245
MER83A-int	0	0	0		0.416025	0	1.01405	0.607033	2.20616	0	0	0.466574
MER83B	0	0.540888	0.643582		2.65474	3.11043	4.91549	2.47829	9.43877	1.79629	2.97544	2.3159
MER83B-int	0.608551	0.943615	0.580832		1.31878	1.14034	1.88383	1.11818	2.7953	2.68988	1.44549	1.37282
MER83C	0	0.641026	0.775363		1.27696	1.07524	1.43216	1.02871	3.13218	0.548787	1.12069	0.959165
MER84	0.434679	0	0.43056		1.05372	1.01594	1.19925	0.753127	3.60023	0.840912	1.43311	0.935412
MER84-int	0.587686	0.504206	0.628574		1.42183	1.44429	1.29299	0.710804	1.53894	0	0.865777	0.894856
MER85	1.26926	2.49684	1.36206		2.58743	2.25995	3.23609	2.88495	3.82751	1.98212	2.95785	2.36616
MER87	0.434679	0.455039	0.516081		1.42745	1.18139	1.56154	2.00262	1.41905	1.23685	1.66704	1.42408
MER87B	1.99952	1.78243	1.11072		2.22642	1.30621	2.48759	1.77253	4.32757	2.09265	2.04033	1.60237
MER88	0	0.875384	0.726901		1.4685	1.18181	1.31855	0.660813	2.17859	0.69646	1.10671	0.740967
MER89	7.31999	9.61002	7.39002		16.9278	11.5485	16.685	10.5725	24.466	14.5647	14.9733	12.9382
MER89-int	1.28665	2.64343	2.3171		4.46207	3.50354	4.53458	2.98972	5.54986	3.8639	4.3519	3.93825
MER90	2.3497	3.42916	3.13428		4.74113	3.98704	7.156	4.82009	8.05763	6.08732	5.00532	4.81668
MER90a	8.38061	13.9814	11.5591		19.7437	13.9748	20.172	17.2552	25.1782	17.0086	17.9655	15.533
MER91A	12.7566	26.1579	18.6635		29.2098	27.444	30.002	33.4167	38.0181	24.2363	30.7706	34.3419
MER91B	4.29463	5.93907	4.72043		9.75485	6.57251	6.55071	5.92152	8.78413	3.85044	7.00258	6.8953
MER91C	1.47791	3.08103	2.35533		5.10139	6.2474	5.90342	6.18121	9.69978	5.69158	7.87294	8.29338
MER92-int	3.69825	5.58454	3.94346		6.32089	2.81975	5.94957	5.9521	6.24316	6.5498	5.26128	5.0949
MER92A	0	0	0		0	0.559803	0.597339	0.400976	0.854464	0.857611	0.48698	0.566468
MER92B	4.36418	6.74693	5.05659		8.95869	7.29818	10.3122	7.14043	16.2412	7.07258	8.28638	7.6629
MER92C	0	0.444501	0		0.735466	0	0.500826	0.53355	0.799119	0.770675	0.592216	0.474547
MER92D	0.573776	0.478701	0.442483		0.51975	0	0.911349	0.829596	0.927248	0.964596	0.607502	0.574415
MER94	7.42432	14.0516	9.62993		17.2516	12.212	16.7823	16.9441	20.5951	14.7348	17.5143	14.6806
MER94B	1.92997	2.48743	1.68398		3.91883	4.91341	2.97423	4.11877	3.42841	3.77144	3.78896	3.68802
MER95	1.7561	1.96021	1.35504		2.47042	2.01115	1.94254	1.45038	2.32972	1.07839	1.01127	1.01755
MER96	2.52114	4.48015	3.01475		6.15235	4.98308	4.15684	3.4106	6.51618	2.18162	4.4236	4.44232
MER96B	2.79933	4.02109	3.00561		6.6175	4.70649	5.87262	4.99013	7.30366	4.39862	5.98399	4.91646
MER97a	0.712874	1.17825	0.953623		1.48056	1.18181	0.93032	1.23218	0.93128	1.99507	1.59921	1.00897
MER97b	0	0	0		0	0	0.555816	0.478832	0.561037	1.11197	0.493672	0.446292
MER97c	1.92997	1.30608	1.11695		1.46197	0.767138	1.37321	1.11818	2.14029	1.05416	1.48167	1.19455
MER97d	0.92152	0.551324	0		0.68504	0.435403	0.908247	0.462924	1.29361	1.52302	1.28693	1.00373
MER99	1.8952	1.74223	1.36673		3.79609	1.63794	2.19591	1.34955	2.46525	0.686017	1.43404	1.14306
MER9B	0	0	0		0.519426	0	0.684841	0	0.403755	0.608276	0.59518	0.673988
MER9a1	0.791464	1.14475	0.91062		2.02986	1.89089	2.55636	1.60309	2.68432	2.86485	2.06013	2.2013
MER9a2	2.38517	2.9595	3.08757		4.92099	3.91572	3.17549	2.48402	3.16787	3.52163	3.28856	2.55977
MER9a3	1.92545	3.15439	1.92022		7.57696	10.8415	7.06346	3.90303	8.04582	3.31498	6.25107	4.52327
MERX	0.469453	1.64862	1.07154		1.92351	1.14034	2.60797	1.52056	1.66216	3.56827	2.28228	2.11707
MIR	431.559	773.649	554.892		1046.61	783.072	1059.41	848.194	1258.41	841.297	1047.81	947.715
MIR1_Amn	39.3819	63.9916	52.7781		86.4844	66.5934	79.3284	65.6034	94.5288	48.6796	73.418	72.6844
MIR3	355.114	524.873	391.051		549.211	468.064	556.671	472.923	661.877	355.264	522.106	485.49
MIRb	555.329	967.73	692.814		1354.75	1110.17	1432.49	1163.59	1713.53	1059.63	1430.62	1314.88
MIRc	361.517	559.937	409.397		633.114	505.854	645.674	563.263	760.349	505.305	658.662	620.773
MLT-int	1.65178	2.60205	2.02765		2.68304	2.55022	1.75194	1.24961	2.59241	1.86623	1.68124	1.828
MLT1-int	0	1.18575	0.696091		1.05118	1.28547	1.88548	1.23177	4.16203	1.07787	2.01674	1.47721
MLT1A	37.7816	59.366	46.2204		72.2235	65.1959	76.9514	55.1639	79.6432	46.7036	62.2169	57.5528
MLT1A-int	5.51173	10.8013	7.40094		8.43771	5.66023	7.101	4.67526	9.299	4.30148	6.33932	5.01426
MLT1A0	70.748	103.61	79.1741		142.459	117.787	163.406	125.85	201.164	117.611	148.388	129.747
MLT1A0-int	2.12123	4.68304	2.92017		6.20968	5.85471	9.05663	5.40733	11.7512	7.588	7.52481	5.92925
MLT1A1	32.3273	41.0517	33.6846		48.2684	34.1202	50.2762	41.8228	58.7641	37.8512	46.738	40.2305
MLT1A1-int	3.3905	5.7405	5.0153		8.01305	6.1993	8.0041	6.94406	9.86131	7.07523	9.13614	9.7267
MLT1B	53.8306	87.6633	65.4794		121.114	101.779	136.855	110.133	165.487	110.302	141.355	125.695
MLT1B-int	11.6668	16.1414	12.3602		15.6827	8.68732	10.5856	9.38576	12.4904	9.81435	11.0895	11.0323
MLT1C	26.7168	35.382	29.7427		53.0482	43.0526	61.0446	42.9726	82.1321	53.6766	61.3302	55.1341
MLT1C-int	0	0.779059	0.510142		0.944943	0.518336	0.742583	0.625799	0.491522	0.695458	0.665342	0.760136
MLT1C2	45.8159	84.164	62.838		122.016	123.4	137.123	110.161	197.344	103.392	136.718	129.235
MLT1C2-int	1.09539	1.93116	1.68946		5.90038	5.4529	6.23108	4.27615	7.57914	3.70141	5.4253	5.48759
MLT1D	55.7036	91.9753	75.5671		134.059	121.908	173.279	143.124	214.898	134.805	164.263	160.117
MLT1D-int	2.69501	3.45187	2.01793		5.69605	4.84334	10.2648	7.79124	15.2584	9.02782	11.7462	10.4316
MLT1E	1.51268	2.53832	1.51597		4.50964	5.66023	6.36063	4.8202	8.49113	3.83817	6.12835	4.99638
MLT1E-int	0	0	0		0	0	0.434721	0.513285	0	0.61505	0	0
MLT1E1	5.02489	8.60551	7.33584		9.24558	7.15304	8.27895	6.86816	9.99277	6.90158	9.03187	8.19005
MLT1E1-int	0	0	0		0	0	0	0	0	0	0	0
MLT1E1A	5.84243	10.7161	8.29293		15.3884	15.3681	18.6031	14.7594	25.9553	15.605	20.4535	18.0882
MLT1E1A-int	4.4685	4.09392	3.55847		3.37001	1.76234	2.7939	2.47609	3.95458	2.69159	3.09264	2.77683
MLT1E2	20.2769	28.1935	23.6152		37.6303	31.3958	39.9324	31.1093	46.7109	31.7887	37.1025	31.9121
MLT1E2-int	3.62974	5.95682	4.98749		6.59885	4.06707	5.09867	4.67962	7.55058	5.36119	3.64333	3.81052
MLT1E3	4.15553	7.7998	5.90959		11.6086	9.21229	12.3261	11.2471	14.8087	9.06936	12.6568	10.4464
MLT1E3-int	2.5187	2.62304	1.77555		3.34763	2.07044	2.05627	1.22624	2.28187	2.36958	1.80389	1.41747
MLT1F	34.2757	48.7268	41.4526		68.9145	77.0364	71.1719	52.1991	84.2967	44.9502	59.8514	61.3496
MLT1F-int	8.01548	10.3071	8.19119		10.922	6.57251	9.40967	8.60713	9.48828	7.86431	9.70942	7.97232
MLT1F1	11.5795	19.9274	13.7184		24.3135	22.7728	29.0407	20.2392	32.9181	22.3104	27.7204	23.5822
MLT1F1-int	1.86043	2.21087	1.6228		4.00242	2.42581	5.12615	4.21218	9.24512	5.06751	5.36132	4.82195
MLT1F2	33.2363	52.0625	42.5961		66.8215	50.719	62.5906	49.8128	67.6874	47.239	62.8442	57.0142
MLT1F2-int	14.205	15.2974	12.8848		14.0909	7.48436	8.1769	5.95473	8.31758	3.45479	7.08416	5.8332
MLT1G	10.3627	14.0822	10.9548		22.772	18.4113	26.2919	23.8608	29.436	20.5657	27.9934	28.5802
MLT1G-int	1.19971	3.59728	2.10926		6.31672	2.50875	3.74452	3.14074	2.54557	2.35667	2.88009	2.44455
MLT1G1	11.3483	21.3194	15.8059		27.0639	24.0744	35.6491	29.9539	57.3821	43.4173	43.0892	35.7638
MLT1G1-int	6.58973	9.89858	9.54312		11.3054	13.7877	8.29866	6.1192	8.73604	5.02885	5.75502	5.25766
MLT1G3	7.80684	14.2511	10.6176		21.2362	18.3698	23.7823	18.7504	31.952	15.582	23.765	21.4082
MLT1G3-int	1.68655	1.02357	0.882173		1.85349	1.80381	3.19909	1.90073	3.73631	3.99939	2.82252	2.02735
MLT1H	26.9498	52.5307	43.9845		70.3391	59.8882	64.5153	49.0632	90.3742	52.7652	72.303	64.2438
MLT1H-int	3.32095	5.3068	4.495		6.21044	4.11766	6.30723	5.22932	5.44229	7.46636	5.8324	5.4849
MLT1H1	10.7846	15.5406	12.9045		25.7908	24.1541	27.0167	24.0821	49.3299	26.9567	31.9173	26.5909
MLT1H1-int	1.39097	2.3002	2.04325		3.4998	2.9964	2.78814	2.98465	3.18939	2.32156	2.93126	2.42348
MLT1H2	7.74633	14.9524	10.788		23.6389	20.3366	25.4789	20.659	28.6391	19.6764	25.8719	23.9618
MLT1H2-int	0.712874	0.880084	0.633813		1.80766	1.92821	2.2057	2.15068	2.25729	2.02079	2.53306	1.80833
MLT1I	24.1981	40.7174	33.5319		64.3109	53.4654	63.0646	52.0555	77.1232	49.3809	65.364	57.1328
MLT1I-int	0.991068	1.54538	1.35556		2.91106	3.27589	2.90939	2.74207	5.90749	4.32464	3.86216	2.93899
MLT1J	59.7931	94.307	74.5095		134.86	108.195	144.987	120.923	165.507	115.775	144.474	133.888
MLT1J-int	7.52864	9.21767	6.54199		11.0931	7.61457	7.34028	6.35253	7.78654	6.03268	8.79553	7.13319
MLT1J1	14.2053	25.5155	21.2959		38.9294	30.049	32.9959	25.7925	35.3725	25.196	29.7225	28.0676
MLT1J1-int	5.61605	7.4075	7.70124		17.9473	10.7192	11.1717	9.85951	9.70426	10.9666	8.53268	9.75342
MLT1J2	25.732	38.0495	32.223		43.606	36.6373	43.3892	43.1995	52.905	43.369	48.3605	46.7795
MLT1J2-int	1.33881	4.11559	3.17822		6.52352	6.15784	4.966	4.80958	7.53865	4.64277	6.33552	5.49445
MLT1K	40.7162	74.83	54.6411		107.027	99.2216	118.483	92.2584	143.198	88.4488	113.118	101.666
MLT1K-int	0.504228	0.513233	0		0.484429	1.38914	1.19921	1.18907	1.82074	1.07563	1.00946	0.884582
MLT1L	39.7331	57.7858	44.5328		74.8242	65.2171	82.8517	68.8702	103.138	73.2074	86.8416	78.9447
MLT1L-int	0	0.481598	0		0	0.476869	0.560345	0.603247	0.711859	0	0.591676	0.58362
MLT1M	2.81672	7.14688	4.88891		10.8294	12.1705	10.9553	7.95295	14.3361	7.48468	10.5756	8.83856
MLT1M-int	0	0	0		0	0	0	0	0	0	0	0
MLT1N2	10.9017	17.8286	13.4387		25.6067	20.7646	29.0166	20.13	35.3898	21.7033	25.8139	22.3378
MLT1N2-int	0	0	0		0	0.476869	0.443304	0	0.806057	0	0.443322	0
MLT1O	10.3627	20.9828	14.0845		24.267	23	25.8805	18.9219	33.4074	19.2522	26.8304	23.7291
MLT1O-int	0	0	0		0	0	0	0	0	0	0	0
MLT2A1	5.32047	9.30306	7.96323		13.5914	10.2266	13.5409	11.143	15.4676	10.6577	11.9031	10.7477
MLT2A2	14.3674	20.3588	16.2011		28.2129	25.9823	28.1915	23.5387	32.496	22.4452	27.5916	25.7821
MLT2B1	8.95439	15.9059	12.8017		20.3881	15.6621	20.1126	20.0234	23.2992	15.9616	21.5566	17.5092
MLT2B2	4.64237	8.10239	6.70295		11.1846	7.44331	13.2797	8.58364	14.0557	9.79685	10.538	8.96587
MLT2B3	30.2098	46.2993	38.0879		51.1426	39.6233	52.9452	41.943	59.6858	49.7035	50.3621	49.6735
MLT2B4	17.7398	36.9203	34.6976		59.6763	47.6057	55.1818	35.213	59.8716	41.7823	44.1701	46.3813
MLT2B5	0.678099	1.36835	0.890261		2.06882	2.03188	1.82303	3.11466	2.6405	2.10642	2.96041	2.49675
MLT2C1	4.13467	6.66531	5.08751		11.0966	9.97155	13.3426	14.1278	14.8423	12.9198	14.3434	12.3718
MLT2C2	1.8952	3.08229	2.29323		4.75372	3.46249	5.41642	4.66345	7.97363	4.48432	6.18523	5.44939
MLT2D	14.5183	18.4086	16		23.886	19.1366	25.5982	20.3448	31.4709	25.0908	26.1505	23.2956
MLT2E	1.51268	1.63118	1.88043		4.95642	4.14669	7.41755	4.67927	9.17402	2.23796	4.38769	5.27198
MLT2F	9.92807	12.3505	11.9726		16.9009	11.9047	19.1622	18.6487	22.4973	18.8402	22.127	21.4392
MST-int	0.469453	0.645195	0.591852		1.15781	1.73746	1.46595	1.00697	1.84251	1.11115	1.66603	1.49637
MSTA	47.451	83.5341	70.2381		139.132	102.346	144.162	103.368	199.168	93.07	120.772	110.906
MSTA-int	83.8541	131.479	114.609		155.078	110.34	178.796	212.488	238.968	160.04	238.066	264.106
MSTA1	5.01793	10.4857	8.80082		12.9128	8.47957	13.3282	10.7872	8.84469	11.6219	9.44979	8.88473
MSTA1-int	0	0	0		0	0	0	0	0.847744	0.406728	0	0
MSTB	24.7065	38.6527	33.2685		64.2835	50.2575	65.3766	49.2821	83.784	39.6733	55.6656	51.057
MSTB-int	7.56341	12.8895	9.2685		19.7512	18.7638	18.295	20.8433	27.3208	16.852	19.4186	17.6485
MSTB1	13.8071	24.1642	17.2345		30.6424	28.9854	34.8255	25.1123	43.221	28.5894	28.8664	23.6153
MSTB1-int	1.58223	2.59586	2.19832		3.53017	2.25995	4.41936	4.88186	5.45026	3.05363	4.92652	4.10589
MSTB2	6.79838	12.5701	8.27785		12.5218	10.6985	15.0485	9.24934	15.658	8.71927	12.9297	9.29722
MSTB2-int	0	0	0		0.587045	0.642737	1.14718	0.811646	1.65301	0.905053	0.898659	0.667853
MSTC	12.9886	19.9893	15.5858		25.1902	19.676	23.101	18.1559	30.8551	18.1682	28.0845	25.4078
MSTC-int	2.24294	4.72155	3.25261		6.02014	4.00156	7.69368	4.94312	5.89054	5.04723	4.50825	4.84448
MSTD	32.0094	50.0185	39.5301		53.5303	45.1164	65.0216	56.6522	67.1702	52.9187	61.9241	56.901
MSTD-int	17.1264	24.4079	20.114		29.1561	18.8467	20.4723	15.696	18.7875	12.6644	15.6533	13.2238
MamGyp-int	5.37263	7.47249	6.70393		12.3706	11.1339	11.0459	9.77349	6.99017	4.81507	11.7589	15.787
MamGypLTR1a	1.51268	2.18606	1.48858		2.84765	3.1971	3.37647	4.26745	5.89917	3.67349	3.83774	3.2267
MamGypLTR1b	2.38204	3.53553	3.06304		5.90284	5.1788	5.10424	5.07898	6.97554	3.90369	4.99857	4.69209
MamGypLTR1c	0.817197	1.77131	1.05434		2.63534	3.37955	3.27919	3.58816	4.73365	3.91756	3.6167	3.65576
MamGypLTR1d	1.61701	2.58151	2.53086		3.74298	4.66503	6.56855	5.547	6.97863	4.5322	6.71655	5.8707
MamGypLTR2b	1.23449	1.83604	2.15227		3.18066	3.25515	4.50792	5.16399	5.35459	4.28893	4.51199	4.33662
MamGypLTR2c	1.16494	2.72975	1.75846		2.41499	2.34288	3.79833	2.99628	5.43073	3.11601	3.34511	3.0737
MamGypLTR3	1.92997	2.34756	1.89987		3.53625	4.49916	6.00323	4.3598	5.88812	2.60464	5.20012	4.11292
MamGypLTR3a	2.45124	5.43847	4.00637		7.27702	5.58393	6.56537	5.45179	8.45691	6.2495	6.14648	5.8159
MamGypLTR4	0.747648	1.98292	1.39628		1.69185	1.59648	1.69811	1.88494	2.27141	1.7674	1.89522	2.10694
MamGypsy2-I	2.52114	4.54607	3.16845		5.4443	4.00156	7.53154	6.41841	10.0144	7.86177	7.83255	6.87835
MamGypsy2-LTR	0.643325	0.942778	1.05486		1.62536	1.63794	1.54164	1.70742	1.83563	1.52689	1.69613	1.13251
MamRTE1	32.7282	40.9195	31.7113		51.1373	37.6171	55.6398	45.8934	65.9012	45.5949	56.2459	49.1432
MamRTE2	0	0	0		0	0	0.479948	1.0435	0.52603	0.84442	1.09227	0.873536
MamRep1151	2.48636	3.83997	3.29544		4.1917	2.71608	4.57812	3.72013	3.9937	3.93991	3.91795	3.44494
MamRep137	9.23258	19.7547	12.153		19.7973	13.8707	18.1344	15.7968	21.3844	17.2634	21.4431	18.5354
MamRep1527	1.23449	2.56208	1.76393		3.18201	3.66982	3.85374	3.81001	6.17232	4.72844	4.51749	3.99956
MamRep1879	2.20817	4.48346	3.66529		6.27779	5.2041	6.40943	4.91482	10.3965	3.87816	7.09528	5.37362
MamRep1894	1.19971	2.40656	1.47371		2.81129	1.26474	2.18382	1.53509	3.03918	0.739029	2.10426	1.69676
MamRep38	4.50675	8.24409	6.76569		13.5699	11.6812	15.1423	11.7299	23.5865	13.7624	15.6808	13.7006
MamRep4096	1.23449	2.27545	1.57121		3.46494	3.00635	3.25572	2.69696	4.77654	1.99919	3.36691	2.81144
MamRep434	9.6151	27.2605	16.2331		14.4836	8.95685	15.3998	18.1475	17.7283	18.606	18.5026	15.3988
MamRep488	2.48636	2.89912	2.11146		3.50347	3.04782	3.60062	3.13142	4.09649	2.42684	2.21315	2.59263
MamRep605	19.717	24.5046	18.3846		24.6844	17.3124	24.9551	18.4639	29.1297	17.7182	23.3687	21.019
MamRep605b	9.50487	15.7683	10.7161		17.7973	11.5415	15.9122	16.6465	15.5428	15.367	16.6881	15.5283
MamSINE1	18.5521	30.6326	22.0508		38.2924	26.4642	37.2414	33.737	41.6039	34.4296	44.5003	39.7846
MamTip1	1.06062	1.57918	1.0411		2.59073	1.63794	3.34039	3.20726	3.77312	2.14875	3.48369	3.46049
MamTip1b	0.504228	0.792042	0.601093		1.41537	1.22327	2.68257	1.90862	3.46546	2.12601	2.1929	1.77639
MamTip2	13.3012	20.146	13.3954		23.2539	14.6378	25.0424	21.4959	27.0429	22.4264	26.1178	23.5893
MamTip2b	36.4696	49.3702	36.4959		46.1903	33.2453	38.1115	37.6872	48.9607	42.8897	43.3373	39.1549
MamTip3	1.16494	1.94706	1.1477		3.49729	2.59168	5.05717	2.66757	6.58927	2.39035	3.53437	3.52011
MamTip3B	0.851971	1.04746	0.91784		1.83842	1.43061	1.92015	2.26043	2.74053	2.72498	2.36843	1.80884
Mam_R4	0.747648	1.91568	1.54229		2.48065	1.80381	2.94532	2.50636	3.14098	2.74009	2.9485	2.21871
Merlin1_HS	0	0	0		0.445197	0.476869	0	0	0.607745	0	0	0
ORSL	3.59914	3.96429	2.89119		4.4304	3.42102	6.46608	5.92734	7.47736	8.22613	5.71756	5.19253
ORSL-2a	1.58223	2.85363	2.01415		4.01927	2.92342	3.47533	3.8535	3.21198	4.73317	4.32617	3.62878
ORSL-2b	0.817197	1.43694	1.10461		2.4632	1.26474	3.20613	3.13954	3.48364	4.26702	3.18815	3.35795
OldhAT1	8.99786	14.6182	10.7114		17.568	15.0417	21.1617	19.8818	20.7646	17.4467	20.4689	20.5039
PABL_A	1.16459	1.57429	1.26743		3.05321	2.34288	3.46033	3.00153	3.57964	1.61986	2.85287	2.80276
PABL_A-int	3.75563	5.24988	3.75309		6.40332	4.25036	4.11154	3.09622	4.50889	3.70659	5.04442	3.27798
PABL_B	6.86758	4.30478	4.20251		6.53181	6.68032	8.26053	5.15786	7.90423	5.74921	5.97858	6.13876
PABL_B-int	2.25164	4.24606	2.94232		5.22875	9.83471	6.23893	2.68955	3.57472	4.54488	4.41885	3.4267
PRIMA4-int	4.05121	5.88946	4.43892		8.6498	6.24077	8.99756	8.05775	8.0016	6.73623	7.24994	7.80823
PRIMA41-int	3.41345	3.19353	3.0249		8.7165	6.3237	6.14324	3.96736	12.2477	6.00773	7.06396	4.53741
PRIMA4_LTR	0.886745	1.32528	1.00186		2.63474	1.63794	2.48572	1.55477	3.20257	1.53246	2.10483	1.53323
PRIMAX-int	0	0	0		0	0	0	0	0	0	0	0
Penelope1_Vert	2.7124	4.7215	3.14994		4.28444	2.66757	4.06858	3.29932	3.68451	3.94509	3.64695	3.10786
Plat_L3	12.3498	20.1146	13.2346		26.3572	16.3073	24.1127	19.4032	29.7965	18.5811	22.523	20.6932
PrimLTR79	0.504228	0.895422	0.796566		1.00103	0.933005	0.886679	0	1.17912	0.701178	0.913818	0.730235
Ricksha	2.12367	6.50772	5.38395		8.53931	4.57504	3.47187	4.05123	4.92333	3.21121	3.62936	3.43396
Ricksha_0	2.64285	9.24775	6.89564		5.56782	3.30699	3.98849	2.52123	2.43603	3.34883	3.75222	3.09307
Ricksha_a	0	0	0		0	0	0	0	0	0	0	0
Ricksha_b	3.87734	2.63991	2.06845		3.87635	3.37955	4.2676	3.06466	5.06404	3.56884	3.08027	2.82603
Ricksha_c	1.10096	2.6543	1.8288		3.0461	3.50395	4.06728	2.86717	5.34261	4.99243	3.42714	3.204
SVA_A	7.18125	9.34845	9.37638		15.6914	22.1044	20.072	17.0917	26.8667	11.1029	16.7924	16.3981
SVA_B	14.0453	18.2158	21.0019		30.7254	40.9142	35.9058	29.8028	46.5925	20.2253	28.239	26.4417
SVA_C	10.1461	15.2972	14.8786		24.1579	38.5016	42.9658	37.0703	51.3933	26.3896	37.0398	33.9777
SVA_D	44.6979	66.6424	72.1578		103.488	184.492	153.068	165.762	183.734	101.38	123.124	140.878
SVA_E	5.0075	10.301	7.29543		12.9795	18.9093	18.5308	22.6405	26.0538	11.7982	16.1415	19.4907
SVA_F	8.00296	10.7814	11.9243		20.7203	36.092	30.3058	32.2747	37.0924	16.6678	24.9354	24.6511
THE1-int	0	0.407088	0		0.850457	0.692497	0.874951	0.438965	1.74857	0	0.884246	0.981396
THE1A	11.1653	13.6459	13.1248		15.4376	11.641	14.9145	10.3736	17.4802	11.0329	11.8131	9.6466
THE1A-int	31.1383	41.498	33.5125		63.7171	58.4194	70.8913	59.8921	80.2345	55.835	66.4716	68.8157
THE1B	48.127	63.8181	53.9424		108.742	90.9224	128.98	95.3513	159.959	86.1775	117.898	100.309
THE1B-int	53.727	92.4052	76.2495		140.451	126.085	143.23	102.277	160.945	94.8677	129.447	118.374
THE1C	18.018	31.5046	26.2099		45.9638	35.9348	52.3934	35.634	63.5037	37.3421	51.4236	41.5294
THE1C-int	90.375	50.1552	59.1121		45.8752	114.332	185.832	146.25	414.99	85.6582	116.811	92.395
THE1D	25.1244	41.6225	34.6665		67.1447	57.7228	72.3226	46.8768	89.1762	49.0488	63.2809	54.3843
THE1D-int	19.3686	41.6823	32.5451		68.044	52.4523	61.0063	48.9024	67.925	46.4727	55.2354	48.8916
Tigger1	155.99	239.865	186.287		286.347	192.581	261.67	205.58	283.256	230.459	257.81	199.926
Tigger10	7.66774	10.2376	6.07516		10.4937	7.48478	16.9199	12.9248	22.116	17.9888	19.8716	18.2996
Tigger11a	2.90366	4.408	2.54831		3.43565	2.71608	4.12958	3.88258	4.86533	3.35875	3.91157	3.28616
Tigger12	2.76456	2.60599	2.20589		5.41624	2.71608	5.63672	4.74678	8.7683	4.08712	6.70494	5.77327
Tigger12A	1.47791	2.0628	1.36962		3.87042	2.96488	4.46266	3.45106	5.04895	4.25869	4.67938	3.58501
Tigger12c	1.68655	4.65733	2.48132		5.23862	3.33809	7.01355	4.93727	6.34445	4.75964	6.68387	6.15297
Tigger13a	12.4315	24.3966	20.2983		27.3522	21.9978	36.0307	32.2439	38.86	37.4875	35.7203	34.7699
Tigger14a	2.62546	4.5516	3.10278		6.65069	4.29183	6.57784	7.05179	7.86596	8.55597	8.42469	7.88568
Tigger15a	25.7709	35.6759	24.1901		44.7487	27.5983	40.8485	39.5551	46.5322	42.3689	44.887	42.5829
Tigger16a	9.8234	10.7148	6.65521		11.5042	7.02864	14.6165	10.6056	18.7654	12.4543	12.3689	9.44986
Tigger16b	3.35572	5.68425	3.53452		6.42062	5.20368	7.83402	7.7838	7.35264	6.41204	8.83631	6.73433
Tigger17	4.25985	4.05678	3.4771		4.48175	3.42102	2.82866	2.88194	1.83326	3.45978	2.72368	3.10918
Tigger17a	7.59819	12.3061	8.22303		22.4498	16.2343	24.1855	20.8576	34.476	18.7396	24.1644	19.4813
Tigger17b	0	0	0		0	0.642737	0	0	0.881859	0	0	0
Tigger17c	0	0.809399	0.447799		1.41426	0.808605	1.44826	1.2455	2.22348	1.23978	1.90706	1.2635
Tigger17d	1.82565	2.75757	1.99749		3.42144	2.55022	3.08815	2.96475	3.72879	3.78585	3.61629	3.61116
Tigger18a	5.01307	6.96135	4.17845		7.25973	4.96939	8.50696	8.46631	9.20989	7.16115	9.55223	8.20796
Tigger19a	13.1155	18.8444	13.2941		30.3179	23.2418	28.1716	23.2541	34.5331	24.3918	30.4164	27.1271
Tigger19b	32.9814	38.5772	30.3412		40.4781	28.5064	40.3789	42.9116	41.2546	43.5894	45.287	44.5267
Tigger1a_Art	1.13017	3.56139	2.86605		3.44006	1.84528	3.30337	2.57581	3.09106	2.64016	2.87019	2.37521
Tigger1a_Mars	0	0	0		0	0	0	0	0	0	0	0
Tigger2	33.9224	41.9846	36.3881		64.6482	42.7109	62.7952	49.4554	66.9677	48.0747	57.3478	48.6761
Tigger20a	7.26783	7.43337	5.04635		8.03635	5.16263	11.0558	11.5586	11.9137	9.49415	11.2612	9.29727
Tigger21a	0	0	0		0.946329	0.767138	1.0106	0.765744	0	0.565141	1.10853	0.814945
Tigger22N1	3.52959	6.38237	4.36346		6.58216	5.4529	7.27739	7.65802	8.20187	9.70536	8.00396	6.47027
Tigger23a	0.851971	1.57273	0.952047		1.4888	0.725671	1.75205	1.19714	3.76308	1.37176	1.64941	1.57218
Tigger2a	10.5192	16.3889	12.5143		26.5163	14.2016	28.4695	22.7538	34.129	25.0584	25.6581	20.0121
Tigger2b_Pri	13.1617	16.1946	12.1659		22.4573	12.377	17.8035	11.0672	14.5925	14.4658	15.2825	12.9714
Tigger3	4.99012	8.59746	8.12405		17.5509	8.10678	10.365	6.3434	12.8751	7.44557	9.52198	7.08894
Tigger3a	19.2128	33.1829	27.0543		53.5424	34.5631	49.2109	38.1998	55.5002	36.5819	52.5104	47.9645
Tigger3b	25.7678	41.3976	32.5549		71.9096	39.9078	64.0182	42.5669	70.4514	42.2636	61.9927	48.4212
Tigger3c	7.82248	10.6343	7.83051		16.6723	10.9576	13.9191	10.0861	14.3942	11.0762	14.4117	12.5891
Tigger3d	0.539002	1.03866	0.806632		1.46601	1.01594	1.72115	1.78386	2.07411	1.60645	2.13143	1.6642
Tigger4	9.54555	13.7877	12.2293		19.6788	12.0461	15.7049	12.6833	14.6936	12.3799	14.282	11.5752
Tigger4a	14.4487	22.2626	14.5215		21.3903	18.4246	24.6624	21.9414	24.8074	24.9435	28.2181	20.407
Tigger4b	18.1783	25.5541	18.6145		22.2532	14.7353	24.5291	22.9421	19.5332	22.834	24.451	20.0065
Tigger5	1.54711	2.1443	1.38987		3.06525	1.28547	2.7686	1.89807	3.24594	2.14019	2.63624	2.81452
Tigger5b	6.29415	8.23298	5.53996		9.211	4.97603	8.07053	6.70249	9.35034	8.295	8.92223	7.76959
Tigger6	0.782422	1.08618	0.743422		1.73562	1.55501	2.35315	1.73565	3.58034	1.92388	2.09212	2.01488
Tigger6a	2.50897	5.67407	3.30256		7.66003	4.33288	10.1047	7.36161	12.7747	9.65094	9.86846	9.00695
Tigger6b	0.434679	0.442537	0		0.846685	0	0.881134	0	0.990972	0.788703	0.832105	0.616672
Tigger7	11.0742	16.3124	12.701		21.4072	11.4863	17.483	13.7398	18.6877	11.3614	15.9524	12.6502
Tigger8	3.63392	4.8319	2.94638		6.0256	3.23857	8.26311	5.55654	7.13758	6.03725	5.34068	4.86464
Tigger9a	1.99952	3.32557	2.64371		3.83674	3.42102	5.51538	4.56122	7.94557	5.59773	6.48589	4.84803
Tigger9b	4.12076	9.07212	6.35377		9.02791	5.74317	7.51072	6.47621	13.5867	6.88638	8.39522	6.49332
UCON100	0	0	0		0	0	0	0	0	0	0	0
UCON105	1.58223	2.02227	1.68705		3.18369	1.76234	3.31995	4.37245	4.24884	2.4276	3.66993	3.14666
UCON11	0	0	0		0	0	0	0	0	0	0	0
UCON14	0.504228	0.489918	0		0.476986	0	0.481233	0.769244	0.592114	0.808256	0.59831	0.546062
UCON2	1.09539	2.79867	2.2693		1.73584	0.422962	1.21626	0	1.36775	0.576565	0.803844	0
UCON21	0	0	0		0	0	0	0	0	0	0	0
UCON23	0	0.551933	0		0	0	0.419985	0	0	0	0	0
UCON29	0.434679	0.480568	0		0.57972	0.767138	0.678543	0.633518	0.970974	0.608226	0.912257	0.748582
UCON33	0	0	0		0.465803	0	0.766599	0.704266	0.667996	0.559936	0	0.560302
UCON34	0.817197	1.15622	0.881659		2.46441	1.09887	1.81762	1.53075	3.275	1.19523	1.61721	1.341
UCON37	0.469453	0.560895	0.532833		0.720129	0.684204	0.937196	1.10331	1.44973	0.5909	0.917423	1.01997
UCON38	2.34727	2.44895	1.66096		1.9355	1.01594	2.08111	1.27205	1.72284	1.42651	1.94451	1.44582
UCON39	0	0	0		0	0	0	0	0	0	0	0
UCON40	0.782422	0.529536	0		0.643248	0.642737	0.634003	1.37927	1.64735	1.81687	1.17422	1.29382
UCON44	1.99952	4.14701	2.56411		3.42641	1.51354	3.95665	3.12282	3.83842	4.29889	4.14099	2.88737
UCON49	0	0.482412	0		0.545252	0.559803	0.774325	1.02245	1.13119	2.59739	0.657564	0.692364
UCON51	0	0.425066	0.509168		0.728794	0.476869	0.418093	0	0	0	0.532479	0
UCON55	2.59069	3.40904	2.33466		2.22859	1.28547	1.79049	1.31588	1.76411	1.67232	1.64419	1.33782
UCON58	0.886745	0.884772	0.504568		0.674749	0	0.959902	0.745459	0.982497	0.795232	0.663199	0.548041
UCON62	0	0	0		0	0	0	0	0	0	0	0
UCON69	0	0	0		0	0	0	0	0	0	0	0
UCON7	0	0	0		0	0	0	0	0	0	0	0
UCON73	0	0.959202	0.585191		1.04759	0.808605	1.10711	1.40226	0.650129	1.22604	0.866147	0.683211
UCON78	0	0	0		0.46176	0.684204	0.729882	0	0.77827	0.403446	0.596587	0.483873
UCON8	0	0.510758	0.484025		0.598948	0.60127	1.0424	0.503952	1.2732	0.720004	0.660733	0.502493
UCON80	0	0	0		0	0	0.504211	0.673023	0.545595	0.967748	0.855969	0.884132
UCON81	0	0	0		0	0	0	0	0	0	0	0
UCON83	0	0	0		0	0	0	0	0	0	0	0
UCON86	1.19971	1.34804	1.0501		0.926864	0.60127	0.738592	0.735246	1.41518	0	0	0.624902
UCON89	0	0	0		0	0	0	0	0.753882	0	0	0
UCON97	0	0	0		0	0	0	0	0	0	0	0
UCON99	0	0	0		0	0	0	0	0	0	0	0
X10b_DNA	1.53007	2.04066	1.22635		1.5728	0.642737	1.33966	1.59578	1.58318	1.24703	1.49873	1.36189
X11_DNA	0.504228	0.697327	0.440331		1.13145	0.995206	1.39236	1.21596	1.32194	1.19366	0.944942	0.785019
X12_DNA	4.83363	7.5415	4.73754		9.02125	6.73837	10.7547	12.8601	12.2436	9.85855	13.3879	12.806
X12_LINE	1.16494	1.93148	1.64532		1.57341	1.92821	1.31766	0.888006	2.14101	0.825112	1.10659	1.15424
X13_LINE	0.539002	0.796872	0.583622		0.776059	0.767138	0.792982	0.764887	1.42705	1.24383	1.00191	0.841571
X15_LINE	0.92152	1.05976	0.901764		1.09163	0.60127	0.740793	0.991029	0.707595	1.66438	1.11861	0.84953
X17_LINE	0.817197	1.89502	0.837241		2.53841	1.76234	2.9899	2.46822	4.11056	3.07379	2.50305	2.17218
X1_DNA	1.42575	1.95757	1.22384		3.13718	2.1144	4.62195	2.84718	5.25808	4.79872	4.05989	3.12398
X1_LINE	0	0	0		0	0.476869	0.625991	0	0.58226	0	0	0
X1_LR	0	0	0		0	0	0	0	0	0	0	0
X20_LINE	0	0	0		0	0	0.78303	0.659264	1.2303	0.540199	0	0.447196
X21_LINE	0	0	0		0	0	0	0	0.507013	0	0	0
X22_DNA	0	0	0		0	0	0	0	0	0	0	0
X23_DNA	0	0	0		0	0	0	0	0	0	0	0
X24_DNA	0.956294	0.840343	0.748273		1.19672	1.47208	1.65175	1.63227	1.11047	1.82774	1.77181	1.41387
X24_LINE	0.712874	0.980717	0.688702		1.32613	1.38914	1.79702	0.850767	2.90349	1.11488	1.70286	1.16126
X26_DNA	2.36465	3.53954	2.34268		5.06758	2.46687	8.44342	7.25838	7.43482	5.52498	6.46496	5.20292
X2_LINE	0	0	0		0.437888	0	0.511568	0.420814	1.22441	0.578178	0.840175	0.438717
X2a_DNA	1.16494	1.91147	1.08924		2.42472	1.22327	1.6414	3.46674	1.6054	2.08147	1.96018	2.85639
X2b_DNA	0	0	0		0	0	0	0.580938	0	0	0.469183	0
X30_DNA	1.37359	2.65987	1.88425		4.18836	3.58689	5.07797	4.53692	5.01041	3.58332	4.47969	4.23478
X32_DNA	3.3905	3.68183	2.22972		3.14169	1.47208	3.27031	3.62211	3.13704	3.91755	2.87521	2.92269
X33a_DNA	0	0	0		0	0	0	0	0	0	0	0
X34_DNA	0	0	0		0	0	0	0	0	0	0	0
X4a_DNA	0.643325	0.78194	0		0.723862	0.580537	0.630918	0.445023	1.00257	0.902657	0.562972	0.660222
X4b_DNA	1.19971	1.61616	1.20025		2.49886	2.25995	3.44767	2.46059	4.06346	3.30318	3.31248	2.63415
X5B_LINE	0	0	0		0	0	0	0	0	0.570668	0.504343	0.457941
X5a_DNA	2.32988	2.89069	1.95868		2.32673	0.808605	2.57296	2.51568	1.66177	3.57619	2.58472	2.65898
X6A_LINE	2.69501	3.61365	2.31215		4.54139	2.9993	3.71647	3.67301	4.33793	3.70814	3.69545	3.40938
X6B_LINE	1.94145	2.96379	1.91054		3.54267	2.13555	3.37138	4.00694	3.82557	4.49135	4.4951	3.6466
X6a_DNA	4.97551	5.98651	4.58949		6.11046	3.28625	6.64953	6.10794	6.89324	7.40714	7.67646	5.92276
X6b_DNA	3.1123	3.6184	2.5878		3.99053	2.30141	5.05257	4.94466	4.77667	6.24359	4.28048	4.06802
X7A_LINE	3.91176	5.41337	3.76451		4.47742	2.71525	5.86131	3.59937	6.78673	5.20116	4.90517	4.28402
X7B_LINE	2.52114	2.20914	1.55917		3.07271	2.36361	3.55089	2.41045	4.78829	3.08343	3.51819	2.7292
X7C_LINE	0.851971	2.00801	1.02743		2.70203	1.47208	3.12341	2.02441	3.1313	2.37841	2.72903	2.15789
X7D_LINE	0	0	0		0	0	0	0	0	0	0	0
X8_LINE	0	0	0		0.428474	0	0	0	0.607743	0	0.524591	0
X9_LINE	1.09539	1.30566	1.11243		1.65196	1.18181	1.84302	1.6308	2.64247	1.24549	1.4077	1.21121
X9a_DNA	1.68655	1.70394	1.35164		2.16062	1.59648	2.9292	3.74381	3.13044	1.9104	3.31717	3.02023
X9b_DNA	3.91211	5.01955	3.72719		5.13291	3.21369	4.89645	4.3293	4.31393	4.2217	3.54126	3.04752
Zaphod	5.82435	6.60323	5.52998		7.70517	6.15784	8.03416	4.95506	7.15579	7.20506	6.86858	6.3654
Zaphod2	4.71157	4.13168	3.73081		6.44205	3.29662	4.72316	2.97138	6.67631	4.69243	4.2793	3.95077
Zaphod3	4.08598	5.01959	4.70987		7.78939	4.99676	5.7893	4.8108	6.10461	5.30041	5.48284	5.14907
Zaphod4a	0	0.552593	0.44277		0.815542	0.476869	0.994996	0.896007	1.68359	0.826563	0.911635	0.9805
Zaphod5a	0	0	0		0	0	0	0.453054	0.405647	0.446844	0	0
Zaphod5b	0	0	0		0	0	0	0	0	0	0	0
hAT-16_Crp	0	0	0		0	0	0	0	0	0	0	0
hAT-1_Mam	3.28617	7.53241	4.62941		8.39477	6.36517	10.0916	8.65297	11.8013	8.88031	11.4427	8.13322
hAT-4b_Ther	0.851971	1.05435	0.911254		0.936216	0.725671	1.57197	1.00455	1.24668	0	1.11518	0.769434
hAT-5_Mam	1.91259	3.3439	1.89807		3.91696	2.30141	4.10949	3.67907	5.84126	3.44598	4.06377	3.39902
hAT-N1_Mam	0	0	0		0	0.559803	0.620661	0	1.87588	0.69097	0.868726	0
hAT-N1a_Mam	0	0.51317	0.52829		1.31793	0.684204	1.34946	1.48377	1.2052	0.905695	1.90842	1.28888

## Sheet: cpm_Medial_prefrontal_cortex.
TE.subfam	mean.2A	mean.2B	mean.3A	mean.3B	mean.4	mean.5	mean.6	mean.7	mean.8	mean.9	mean.10	mean.11
Alu	9.84673	13.7755	7.5181	15.1902	14.8662	14.8162	13.189	16.246	23.1933	38.962	17.1771	14.4817
AluJb	991.698	1568.82	714.344	1566.01	1360.38	1421.28	1001.17	1401.89	1891.07	3098.82	1419.57	1290.42
AluJo	294.113	561.242	240.316	567.858	518.964	508.392	381.85	518.383	626.131	1058.39	529.556	477.334
AluJr	845.411	1430.29	632.048	1432.07	1339.27	1251.55	1012.86	1337.62	1762.27	2843.2	1364.21	1227.6
AluJr4	79.842	139.419	64.747	136.124	125.979	107.479	86.3489	118.787	146.46	264.73	125.788	108.638
AluSc	266.117	416.358	210.789	432.184	385.76	605.455	332.611	414.824	593.554	1019.5	405.736	381.242
AluSc5	22.4618	42.1037	19.5397	46.3706	40.2167	60.432	37.1532	46.9193	53.9458	109.657	47.2623	42.9516
AluSc8	163.999	251.853	124.374	247.929	222.267	358.794	180.461	223.945	299.961	571.524	218.904	199.346
AluSg	350.882	563.276	269.719	568.907	515.145	813.009	415.553	539.738	658.743	1261.24	524.795	504.281
AluSg4	86.8057	124.52	63.5103	129.18	121.004	186.447	105.21	122.054	165.21	269.995	118.269	109.41
AluSg7	51.4079	63.449	30.8557	66.6797	60.9721	101.27	73.5377	70.3693	113.865	167.855	69.472	64.5987
AluSp	542	850.619	406.618	858.245	792.941	1246.18	642.127	822.809	1078.49	1846.49	806.068	750.071
AluSq	94.8293	155.968	77.8842	163.402	156.119	231.44	112.03	143.538	192.022	344.001	139.554	130.22
AluSq10	13.7768	18.2215	10.5872	18.3179	16.2474	24.6135	11.2616	13.2002	18.5111	34.0362	12.4418	11.7115
AluSq2	386.33	613.296	295.684	625.117	586.986	848.537	472.123	604.763	754.147	1400.5	588.344	548.728
AluSq4	7.49101	14.542	5.20956	15.4287	13.1199	23.2782	9.84533	14.8294	21.651	37.8515	14.4788	14.3631
AluSx	1122.76	1559.3	768.326	1571.73	1412.88	2102.57	1164.82	1479.21	2096.63	3472.91	1423.64	1394.18
AluSx1	821.64	1401.07	739.908	1386.97	1354.8	1903.35	982.576	1250.06	1560.12	2980.29	1175.17	1133.04
AluSx3	224.231	381.499	167.403	406.4	357.867	504.348	282.427	366.097	500.975	900.659	360.544	335.683
AluSx4	92.1207	128.543	60.2909	136.406	117.083	185.838	92.2621	132.175	163.56	304.227	129.81	121.262
AluSz	815.341	1441.63	637.243	1440.61	1325.09	1879.76	1052.2	1398.26	1764.25	3330.57	1394.54	1320.52
AluSz6	315.509	529.325	233.85	530.512	465.704	586.502	364.858	486.964	627.072	1133.9	492.572	450.97
AluY	599.996	823.465	462.8	956.478	814.887	1435.02	736.299	931.855	1540.32	2374.88	828.783	738.404
AluYa5	13.47	15.181	12.113	19.9855	15.772	28.0425	19.5557	18.8567	49.7301	47.2909	16.7538	13.1064
AluYa8	0.833715	1.10967	0.498628	1.32582	1.46445	1.47653	0.840241	1.15437	3.19371	2.64948	0.833829	0.980235
AluYb8	9.80638	9.94645	7.1606	13.5671	11.0184	20.7898	10.291	11.4822	27.76	32.392	10.7012	7.63708
AluYb9	1.23814	1.1386	0.713708	1.84089	1.32906	2.7622	1.11229	1.53055	2.98484	4.5174	1.57338	0.997724
AluYc	27.4756	35.4577	19.6289	41.799	36.4842	61.1642	34.8809	44.6626	76.7283	106.817	43.4423	33.5717
AluYc3	4.81262	4.37665	3.10896	6.11589	4.5609	9.49432	4.33936	6.19365	10.8596	15.4793	5.41547	4.38039
AluYd8	0.477286	0.555123	0	0.789489	0.453479	1.66865	0.906408	0.972063	4.21344	3.22077	0.795755	0.695771
AluYe5	4.92058	6.37401	3.46982	8.60432	6.51984	14.3548	6.69175	8.5691	16.0442	23.2909	7.46523	5.79569
AluYe6	0.98614	0.994431	0.535874	1.53364	1.31413	2.7772	1.29046	1.73104	3.66329	3.48896	1.43986	1.01997
AluYf1	13.1228	18.6879	10.8004	19.5126	18.3933	27.4215	15.6989	17.7178	28.3963	48.9322	16.5957	14.9148
AluYg6	5.63042	8.89659	6.32273	7.52194	8.00516	7.08136	5.37596	5.58209	8.5455	12.8286	3.55508	3.26876
AluYh3	2.33191	3.53435	2.02889	4.60392	3.38993	6.83131	3.24031	3.57597	6.77921	12.4599	3.73202	3.41916
AluYh3a3	0.918222	1.40197	0.469856	1.79592	1.00409	1.67115	0.951724	1.09854	3.13619	4.20345	1.39052	1.09664
AluYh7	1.13065	1.91345	0.841746	2.83707	2.32073	4.67798	1.83066	2.74541	3.81112	7.27365	1.94133	1.83712
AluYh9	0	0	0	0	0	0.498846	0	0.49015	0.501015	0.813252	0	0.443672
AluYi6	2.56575	2.494	2.41229	2.93557	2.6191	2.82763	2.16203	2.61532	5.38924	5.68426	1.8966	1.74403
AluYi6_4d	0	0	0	0	0	0	0	0	0	0.610038	0	0
AluYj4	15.35	22.1439	12.5998	24.7026	22.4725	34.5941	18.6513	24.1647	40.3563	64.1755	20.8076	17.682
AluYk11	1.04989	0.959035	0.437722	0.744958	0.650595	1.01269	0.910526	1.32875	1.63018	2.23286	0.893335	0.897344
AluYk12	0	0	0	0	0	0	0	0	0.733692	1.31864	0	0
AluYk2	46.3726	56.6529	34.1668	70.1698	59.5613	96.7194	48.8055	69.1343	105.17	165.048	64.9256	56.8309
AluYk3	35.1643	58.8646	28.296	63.7597	61.9117	91.3817	46.4469	56.7207	82.5589	132.551	48.0076	42.5543
AluYk4	7.00913	10.3513	5.52191	11.1005	9.2454	13.2375	7.85474	9.68443	16.3016	23.6776	8.92069	7.49643
AluYm1	28.7421	39.1749	22.8662	46.2095	39.5191	71.1987	33.4971	41.5449	67.4756	119.745	41.6822	37.503
AmnSINE1	5.95025	12.9315	5.86517	12.0852	12.885	9.60851	9.93912	14.5332	13.3701	39.9975	15.5434	15.0061
AmnSINE2	2.97956	3.86937	2.71292	4.07394	5.51535	2.64634	3.35671	4.45148	4.05409	9.50545	4.38804	3.8993
Arthur1	3.27093	7.76134	4.5239	5.12993	8.15302	6.68878	9.09147	11.6223	9.45071	40.343	11.4969	11.3286
Arthur1A	2.40376	3.56551	2.34463	3.48623	3.65416	3.31314	3.96912	5.03432	5.33969	12.0405	4.17859	4.52234
Arthur1B	4.67046	9.20779	6.18052	8.36968	11.6346	7.92652	10.5451	14.0876	15.228	42.9613	14.3318	12.8531
Arthur1C	1.31527	1.60021	1.46994	3.54916	4.44107	3.22979	2.59871	3.045	3.76306	8.07575	3.51961	2.50899
Arthur2	3.53781	4.43687	2.16442	3.86554	5.2096	2.90847	4.29056	6.21656	4.91951	18.6964	5.34749	4.6137
BLACKJACK	4.46083	5.16814	3.15023	6.54383	6.58709	4.77175	5.0032	9.89143	9.91451	38.9019	8.19632	7.20282
CR1-11_Crp	0	0	0	0	0	0	0	0	0	0.580642	0	0
CR1-12_AMi	1.25318	2.36594	2.01778	1.85076	3.10318	1.85452	2.72036	1.92952	2.31945	2.95228	1.91393	1.44617
CR1-13_AMi	0	0	0	0	0	0	0	0	0	1.20604	0	0
CR1-16_AMi	0.865675	1.04527	0.419884	0.891909	1.01062	0.645957	1.07278	1.86003	2.35395	6.06522	1.84048	1.17604
CR1-1_Amn	0	0	0	0	0	0	0	0	0	0	0	0
CR1-3_Croc	2.25717	5.05206	1.94082	3.85914	3.75721	3.66737	3.61759	8.5999	8.12842	17.8111	7.65091	6.89703
CR1-8_Crp	0	0	0	0	0	0	0	0	0	0	0	0
CR1-L3A_Croc	1.22419	2.27945	1.21043	2.0688	3.37897	1.47945	2.52463	2.69543	3.23082	3.95922	2.6104	1.89865
CR1-L3B_Croc	0	0	0	0	0	0	0	0	0	0	0	0
CR1_Mam	9.12174	10.2326	4.38083	10.8125	9.78591	10.2724	7.05309	12.594	15.4315	28.7715	13.0646	10.2285
CRP1	0	0	0	0	0	0	0	0	0	0	0	0
Chap1_Mam	1.43236	2.07884	0.926044	2.30358	2.66582	1.52113	2.70174	3.02504	2.72573	8.72916	4.00942	3.46717
Chap1a_Mam	4.69806	7.5889	4.46454	7.10745	8.06911	6.34288	7.51806	10.1574	15.2809	25.8223	10.6332	8.20287
Charlie1	23.3449	32.375	22.115	25.7286	32.0507	19.848	22.6941	28.0011	29.2784	60.0105	32.8668	27.5627
Charlie10	7.50547	16.0912	11.4877	12.3444	18.6349	7.93861	12.6738	14.2064	12.642	29.9284	16.0987	11.7114
Charlie10a	1.27763	1.37486	0.752459	1.91446	1.35845	1.43778	0.951802	2.14754	1.54239	5.60553	1.73078	1.37856
Charlie10b	0.914477	1.20163	0.533039	1.72949	1.51821	1.7295	1.3668	2.22342	1.42379	5.57633	1.98661	1.9389
Charlie11	0	0	0	0.475501	0.597632	0.562608	0.441099	0.806753	0.483863	1.00407	0.440375	0
Charlie12	2.9835	4.3368	5.00129	3.40062	5.72744	1.93787	8.49783	4.38488	3.61712	1.74075	4.14744	3.12767
Charlie13a	3.19058	6.23189	2.73204	5.79378	6.12186	3.459	2.56317	5.0942	4.81434	13.1446	5.97774	4.72023
Charlie13b	0.862127	1.80019	0.786673	2.64339	2.91136	1.77117	0.968166	2.55511	1.66157	7.38517	2.94573	2.4679
Charlie14a	0.545107	1.02722	0.60611	1.08772	1.4161	1.14605	1.22886	1.51242	2.91426	5.21919	1.54337	1.38517
Charlie15a	15.0905	35.1179	20.1825	28.9009	35.9448	25.4978	34.593	46.6342	30.4163	75.7051	42.4322	42.5908
Charlie15b	11.5291	13.9979	9.61589	14.4695	23.5286	21.6917	34.7425	31.7807	32.7133	44.2537	43.0512	34.536
Charlie16	5.771	9.21217	5.47664	7.86863	8.51062	5.56357	7.08948	10.854	9.81042	28.974	11.0759	8.07998
Charlie16a	5.56538	8.06676	5.41531	7.44041	8.6895	9.12717	9.13681	15.8621	12.4976	31.0257	15.6531	13.9401
Charlie17	6.90391	11.1686	7.39233	9.36853	10.4963	4.43835	5.40916	5.7951	5.01527	12.1551	5.81982	5.28194
Charlie17a	4.97421	5.99858	2.59196	6.46031	7.22006	5.31352	7.44992	10.5499	9.48627	26.8285	12.6295	10.5985
Charlie17b	3.82809	6.80847	4.77169	4.13382	5.51567	4.06328	3.59491	6.12092	3.22385	19.2643	6.92527	7.33394
Charlie18a	11.0784	23.899	13.4318	16.3658	22.925	13.4463	20.2417	24.3863	25.8611	40.0758	23.8637	19.931
Charlie19a	6.25766	12.9451	6.21078	11.1813	10.7821	9.86398	11.5635	15.7991	15.0542	29.2742	14.615	12.9329
Charlie1a	37.0924	54.5008	30.1818	53.1371	55.9469	42.3786	39.1007	63.9245	64.8997	147.275	67.8354	52.4544
Charlie1b	10.9578	17.5095	9.96315	16.01	15.5205	11.9856	11.0696	16.9695	18.6981	38.5983	17.9901	14.1455
Charlie20a	5.42798	7.12311	4.73623	6.25403	6.5198	3.56318	4.39459	7.62387	7.99931	17.994	8.51987	7.28182
Charlie21a	2.18154	3.26425	1.73986	4.13064	3.81446	2.68802	3.05105	5.94938	4.0607	13.238	6.00198	4.89372
Charlie22a	2.62978	5.56746	2.33264	6.26938	7.13006	3.87574	4.65087	7.91839	5.84764	12.2208	7.98442	6.67884
Charlie23a	3.16353	5.69701	2.69519	5.28309	5.76192	4.54254	5.12994	8.87472	9.2105	24.34	8.62625	7.65485
Charlie24	4.30075	8.75011	4.30747	7.05274	8.79357	6.15993	6.01646	9.99933	8.44202	20.9987	8.72523	7.49569
Charlie25	4.2994	3.99929	2.78934	3.76903	4.91791	3.56318	3.30555	5.83128	5.58496	17.7186	5.09996	4.1285
Charlie26a	1.18131	2.35536	1.35768	1.30977	1.73618	1.52113	1.40419	2.03054	1.92098	5.87474	3.00504	2.4404
Charlie29a	3.41273	6.08247	3.65056	5.56057	7.0792	5.60524	5.05084	8.00504	7.42332	25.2128	6.58656	5.88007
Charlie29b	3.66277	5.44974	2.51092	5.96151	5.60235	4.85927	3.78074	7.42594	5.81251	15.6745	7.04322	6.11382
Charlie2a	22.7152	26.2178	21.0063	18.3671	22.5702	12.0231	13.8203	16.6235	15.8341	39.9177	18.8873	13.8884
Charlie2b	13.6333	18.7378	16.7511	17.4491	20.6064	12.2315	15.6273	20.1848	16.7684	50.7463	21.4119	17.7376
Charlie3	2.34471	4.24696	1.7214	3.50326	3.96305	4.10495	2.96749	4.3087	4.53473	22.4558	5.62279	4.59709
Charlie30a	1.14747	1.97399	1.05509	2.0667	2.47485	2.52132	4.12193	5.75166	15.393	10.6733	9.05461	6.8045
Charlie30b	3.32912	3.40875	2.51434	3.53109	4.53197	3.459	3.61324	4.947	4.87166	11.3199	5.30035	3.93453
Charlie31a	2.41297	3.2895	1.81089	3.56131	4.30464	1.68782	2.89324	5.54653	3.55166	17.0241	5.50595	4.95866
Charlie32a	0.870611	2.4156	1.05578	1.0311	0.686647	0.500096	0.688865	1.76665	0.988327	2.01063	1.72345	1.14525
Charlie4	2.40608	4.62684	3.26494	4.92791	5.65184	4.04911	5.59141	5.79985	4.52913	12.113	5.4242	5.39232
Charlie4a	12.3878	16.624	9.46874	16.3913	18.5014	14.1206	15.5078	23.2316	23.6106	52.1941	24.7849	19.6463
Charlie4z	36.0235	56.3789	34.3608	44.387	51.5576	33.1801	35.3651	51.5888	47.2628	82.2079	57.3571	49.6167
Charlie5	23.2806	33.548	27.9773	31.8714	39.1626	35.1943	63.6005	75.1965	79.1622	122.676	119.416	92.2647
Charlie6	0.577594	1.75372	0.828671	2.91628	3.0182	1.18773	0.829532	1.51685	1.53538	5.73787	1.61181	1.63832
Charlie7	14.3645	15.5858	8.59721	16.4138	19.2406	14.2944	14.8518	20.9888	19.1594	62.5821	22.2182	17.7978
Charlie7a	1.9783	4.20437	1.63621	3.35096	3.8693	1.5628	2.76529	5.79376	5.06686	12.1999	5.69875	4.09753
Charlie7b_Mars	0	0	0	0	0	0	0	0	0	1.33926	0	0
Charlie8	25.5596	41.8766	24.3011	37.5617	43.9143	29.1777	31.4428	44.9268	43.9168	98.5448	45.0347	42.025
Charlie9	6.78931	5.14712	3.48689	5.29044	5.81156	6.48041	7.88459	8.34779	13.8105	14.8094	9.93184	8.22079
Cheshire	19.3173	45.8799	38.8222	30.2242	56.0453	33.173	36.7684	34.0487	26.4996	62.5709	40.5773	32.0036
Chompy-6_Croc	0	0	0	0	0	0	0	0	0	0	0	0
Chompy-7_Croc	0	0	0	0	0	0	0	0	0	0	0	0
DNA1_Mam	0	0	0	0.539164	0.434285	0.93768	0.529414	0.669099	0.556294	1.55188	0.809546	0.501789
ERV24B_Prim-int	1.23753	2.42117	1.50179	2.0324	2.26349	2.97974	2.10822	4.16316	3.91087	15.6161	3.54354	3.6848
ERV24_Prim-int	0.956345	2.57822	0.993274	1.73378	2.22531	1.97955	1.5963	3.28988	2.79692	14.227	3.83027	2.77399
ERV3-16A3_I-int	22.4612	41.4098	18.7519	33.6798	37.9633	38.4445	35.4407	70.7885	43.0461	311.99	57.1484	55.0257
ERV3-16A3_LTR	1.8014	3.1948	1.61212	4.19435	4.2358	4.93845	4.43134	7.39688	5.11478	31.5734	5.9977	4.61082
ERVL-B4-int	45.5928	78.0153	38.6291	59.0489	79.6459	43.9997	49.8044	85.8212	47.8091	211.349	72.6501	70.1147
ERVL-E-int	33.9326	80.8437	36.776	66.5413	76.7337	48.8056	45.6703	83.3281	57.5719	292.608	69.114	67.8205
ERVL-int	4.43171	10.6739	3.99768	6.33191	8.08595	5.64692	6.12856	12.0807	9.76223	44.0201	9.18175	6.48638
ERVL47-int	0.831464	1.29758	0	1.70124	1.55403	1.02103	0.662345	2.1861	1.48336	11.6929	1.64708	1.72652
EUTREP15	0	0	0	0.691478	0	0.520933	0	0.686974	0.481071	3.39399	1.14035	0.629842
EUTREP16	1.01966	2.08277	1.31362	1.22754	1.28841	0.979355	1.55213	3.1687	2.08051	6.00838	2.67539	2.43682
EUTREP4	0.460013	1.32916	0.553498	0.812353	1.67043	1.14605	2.76247	2.58207	1.25596	4.12399	2.64274	1.9665
EUTREP7	0.425176	0.953658	0.582239	0.989034	0.675864	0.645957	0.725626	1.19748	0.917253	4.29601	1.06386	0.900072
EUTREP8	1.19481	1.402	0.582766	1.46128	2.06092	1.35443	2.24025	2.1178	1.93569	4.93477	2.54994	2.24817
Eulor1	0	0	0	0	0	0	0	0	0	0.405378	0	0
Eulor10	0	0	0	0	0	0	0	0	0	0.76302	0	0
Eulor11	0	0	0	0	0	0	0	0	0	1.04337	0	0
Eulor12	0	0	0	0	0	0	0	0	0	0.635387	0	0
Eulor2A	0	0	0	0	0	0	0	0	0	0.743674	0	0
Eulor2B	0	0	0	0	0	0.479259	0	0	0	1.32788	0	0
Eulor2C	0	0	0	0	0	0	0	0	0	0	0	0
Eulor3	0	0	0	0	0	0	0	0	0	0	0	0
Eulor5A	0.444136	0	0	0.44741	0	0	0	0.916207	0.651957	1.70448	0.723722	0.749213
Eulor5B	0	0	0	0	0	0	0	0	0	0	0	0
Eulor6A	0	0	0	0	0	0	0	0	0	0	0	0
Eulor6B	0	0	0	0	0	0	0	0	0	0.611561	0	0
Eulor6C	0	0	0	0	0	0	0	0	0	0.594414	0	0
Eulor6D	0	0	0	0	0	0	0	0.46087	0	1.57291	0	0
Eulor6E	0	0	0	0	0	0	0	0	0	0	0	0
Eulor7	0	0	0	0	0	0	0	0	0	0	0	0
Eulor8	0	0	0	0	0	0	0	0.588746	0.519743	2.8517	0	0.402552
Eulor9A	0	0	0	0	0	0	0	0	0	0.934714	0	0
Eulor9B	0	0	0	0	0	0	0	0	0	0	0	0
Eulor9C	0	0	0	0	0	0.687632	0	0	0	0.414382	0	0
EutTc1-N1	0	0	0	0	0	0	0	0	0	0	0	0
EutTc1-N2	0	0.480541	0	0.58853	0.456056	0	0.731644	0.840098	0.728191	1.69319	0.901048	0.572483
EuthAT-2	2.52768	5.84443	3.48946	5.98568	9.14247	7.9807	9.5485	9.67321	11.6264	21.5536	11.1008	8.5399
EuthAT-N1	0	0	0	0	0	0	0	0	0	1.81301	0	0
EuthAT-N1a	0	0	0	0	0	0.479259	0.478646	0	0	1.42894	0	0
Eutr10	2.51196	6.47829	2.87207	4.11779	4.9099	3.64653	4.03867	6.75034	4.14057	21.8244	7.14755	6.00916
Eutr11	2.88286	5.20032	3.53534	5.80789	5.64499	2.72969	5.25387	5.98606	4.54164	13.1706	7.30346	7.09527
Eutr15	0.432929	0.729694	0	0.641841	1.07888	0.645957	0	1.83731	1.88578	6.25466	1.4786	1.22024
Eutr16	1.41852	3.14276	1.37584	1.40058	1.93511	1.77117	1.95889	4.06656	2.11294	9.85178	2.83402	2.55486
Eutr18	2.12618	5.12886	1.96736	4.76665	4.97377	5.64692	3.96391	5.76408	4.67624	13.5527	5.37982	6.20281
Eutr2	0.78249	0.545093	0	0.563298	0.707385	0.93768	0.551217	0.918097	0.785866	2.71733	0.813334	0.545751
Eutr2B	0	1.17752	0.434653	1.43134	1.01992	1.27108	0.960714	2.44741	1.56218	4.71935	1.88877	1.84916
Eutr5	0.946825	1.58293	0.893709	2.21023	1.58538	2.06248	1.57062	2.12822	2.05864	7.28589	2.16746	2.08309
FAM	27.7565	50.6611	24.5887	47.0342	40.7386	29.0097	28.5537	40.2326	48.2535	72.9407	40.1772	36.4235
FLAM_A	67.9328	95.3989	45.0775	97.1242	94.2774	71.65	72.9277	94.3151	118.633	164.326	96.2749	82.2614
FLAM_C	105.179	173.041	82.5243	170.139	166.158	134.062	133.017	160.579	226.965	284.326	163.297	144.229
FRAM	79.1689	144.335	62.7349	157.623	140.101	128.981	114.457	147.784	183.088	320.962	153.667	139.478
FordPrefect	2.49732	3.55317	2.15781	3.55264	3.39264	2.93098	2.70828	5.65083	2.75563	23.3154	4.3145	4.56947
FordPrefect_a	0.744749	1.58279	0.555058	1.51927	1.14349	1.48612	0.9268	1.77482	0.877453	6.18646	1.00302	1.18514
HAL1	192.745	218.878	116.333	211.038	228.9	181.581	185.081	256.752	295.142	605.167	294.558	227.225
HAL1M8	21.0727	39.658	23.6886	26.9409	33.243	23.3587	24.5303	36.984	23.9105	68.3452	40.7963	33.6491
HAL1ME	27.8062	39.1679	24.8477	38.8623	45.0806	29.3556	38.875	50.8495	64.94	124.291	52.7702	41.635
HAL1b	11.9916	19.0056	10.7192	19.842	23.5057	18.3535	32.2853	37.2351	32.8473	74.0312	32.1679	25.0346
HERV-Fc1-int	7.89527	22.4117	11.2863	11.8441	12.0078	6.71671	8.78471	10.9936	7.12671	3.80916	8.45908	6.68633
HERV-Fc1_LTR1	0	0.701689	0	0	0	0	0	0.441243	0	0	0	0
HERV-Fc1_LTR2	0	0	0	0	0	0	0	0	0	0	0	0
HERV-Fc1_LTR3	0	0	0	0	0	0	0	0	0	0	0	0
HERV-Fc2-int	0	0.69876	0.409539	0.544088	0.79936	0	0.618049	0.582349	0.606482	1.00762	0.42719	0
HERV-Fc2_LTR	0	0	0	0	0	0	0	0	0	0	0	0
HERV15-int	4.05004	1.45425	1.06978	1.89631	1.62029	2.45172	1.32698	4.05014	2.67787	12.3144	2.97989	2.15982
HERV16-int	9.34485	19.4911	9.17627	13.9582	13.1823	9.91857	8.67755	18.4466	13.3946	72.9812	16.8628	15.6298
HERV17-int	9.99757	14.7111	6.23667	14.1875	11.1117	15.5842	8.59188	20.1355	20.1177	84.2277	17.9225	14.9864
HERV1_I-int	1.39493	9.21573	1.76211	5.99192	6.36235	3.31314	2.66718	3.61041	4.84462	10.2466	3.05452	2.62892
HERV1_LTRa	0.652362	0.894446	0.5073	0.494732	0.745396	0	0.454267	0.570548	0.786741	0.709717	0.457818	0.482473
HERV1_LTRb	0	0	0	0	0	0	0	0	0	0.631894	0	0
HERV1_LTRc	0	0.64415	0	0.628833	0.859234	0.479259	0.58195	0.930196	1.42203	1.10063	0.451854	0.649072
HERV1_LTRd	0.427709	0	0	0	0	0	0.413971	0.526987	0.436899	0.954563	0	0.545657
HERV1_LTRe	0	0	0	0	0	0	0	0	0	0	0	0
HERV3-int	10.4269	15.4614	6.92093	12.5736	11.5038	9.2101	5.69238	11.0487	9.39803	26.7558	10.3239	9.81261
HERV30-int	0.686746	1.28747	0	1.22534	0.977637	1.0627	1.29676	1.44324	2.04356	9.13523	1.38637	1.62897
HERV35I-int	3.13823	3.57638	1.70981	3.7893	5.9313	4.14663	2.68179	4.28201	3.92363	18.0871	3.70621	2.71257
HERV4_I-int	9.44885	14.5361	6.21188	13.7316	13.1857	11.8598	8.33957	14.3647	13.4422	31.1164	14.9991	13.9758
HERV9-int	5.20626	6.16131	2.87971	7.12066	6.62074	8.6975	6.29278	14.7105	12.3723	68.8504	12.8695	12.0578
HERV9N-int	4.31476	5.71888	2.97074	5.25044	5.4132	5.69818	3.55766	9.64552	5.46812	37.7431	7.22228	5.84378
HERV9NC-int	5.33872	6.15257	2.26343	6.39955	4.59217	8.36952	4.63281	11.3301	7.50305	64.566	9.11638	8.41805
HERVE-int	15.408	20.8501	10.8577	18.2689	16.1692	21.8375	22.1759	55.9882	24.3582	71.1685	38.1729	41.5302
HERVE_a-int	15.5616	24.8882	14.6071	21.0983	23.3293	11.736	9.72715	11.7535	10.5176	36.6393	12.8826	11.7576
HERVFH19-int	0.404336	0.505001	0	0.599763	0.877809	1.02103	1.78782	3.52748	2.83017	11.1871	2.61602	1.90438
HERVFH21-int	2.23436	7.36904	2.08756	5.62817	8.36413	6.89716	5.50122	10.0483	8.834	16.3024	6.54315	5.73017
HERVH-int	58.9288	171.809	70.0336	147.577	254.294	223.265	280.506	352.524	459.375	565.335	324.347	283.57
HERVH48-int	8.67848	18.9795	6.9115	16.3086	17.5592	17.8993	19.3164	23.9694	33.6209	31.3577	22.7314	21.7114
HERVI-int	2.66435	4.54649	1.94166	4.21578	4.59676	3.78739	2.6635	5.14015	5.22774	15.3723	4.01217	3.32049
HERVIP10B3-int	12.2112	17.3827	6.70087	15.6525	15.9644	12.0898	6.81487	14.3034	12.9707	29.0076	15.0419	14.2162
HERVIP10F-int	7.70331	19.7295	7.2073	14.743	20.4137	10.4107	8.08769	15.5927	11.3961	42.0687	12.2963	12.2245
HERVIP10FH-int	4.87173	7.8869	2.66013	8.86896	8.33554	10.4658	7.63726	10.6862	16.8545	29.463	14.1731	10.3264
HERVK-int	25.459	42.4877	26.9591	54.1152	61.4791	52.5122	45.4447	51.2446	92.3502	100.008	72.7188	56.4361
HERVK11-int	6.83802	17.5154	8.07679	12.727	15.9918	16.3877	13.0922	17.7185	20.3227	43.274	18.0603	15.8129
HERVK11D-int	0.547666	0.597594	0.453563	0.559748	1.17075	1.0602	1.71433	1.81226	1.34012	8.28501	1.2567	1.25556
HERVK13-int	18.5643	17.5458	10.2213	17.4409	20.518	19.3891	6.32866	7.56941	15.0203	18.3879	9.27574	11.2085
HERVK14-int	8.9402	25.7707	11.1474	23.373	29.3386	13.28	12.8974	17.1061	15.8968	38.8783	13.665	13.9254
HERVK14C-int	2.04511	2.82866	2.18369	4.7763	4.73569	4.28166	2.67288	3.50864	2.60228	11.1983	3.53014	3.76246
HERVK22-int	5.66363	9.46027	4.32666	8.53395	7.83555	6.73046	5.43062	14.3322	9.83073	36.2479	10.5899	8.82228
HERVK3-int	17.3465	36.9353	17.5957	31.7825	31.3146	21.7333	18.0305	27.3063	21.826	42.8883	25.9902	25.0135
HERVK9-int	26.0459	39.5837	19.6291	38.0043	35.1358	42.2144	27.0789	48.3915	45.8581	116.352	41.0276	43.0433
HERVKC4-int	0	0.726675	0	0.598921	0.576545	1.46903	0	0.77314	1.22954	4.81491	0.939474	0.699795
HERVL-int	28.7912	43.4377	20.1938	37.036	34.8838	31.7653	31.8336	71.5369	49.1158	346.005	61.896	53.3501
HERVL18-int	2.48936	3.79642	2.45569	3.9646	2.816	2.10457	4.45865	7.78746	4.31135	54.8418	7.20645	7.75528
HERVL32-int	0	0	0	0	0	0.479259	0	0.844921	2.37008	6.74864	0.612201	0.54433
HERVL40-int	14.1403	26.2671	15.8581	17.1357	19.1289	11.7939	13.276	18.0517	12.6095	50.3243	17.5462	17.3828
HERVL66-int	2.86212	4.27518	3.85834	3.25353	3.57884	2.81304	2.65798	3.08724	3.5494	12.2765	4.41061	3.57219
HERVL74-int	7.21603	16.2237	8.86381	10.1921	10.8868	5.27185	6.15959	6.93596	6.66454	15.1194	7.31015	6.22084
HERVP71A-int	2.53217	5.75741	2.10698	3.62946	3.63596	3.22937	4.14063	12.2421	6.83976	25.205	12.1205	14.5011
HERVS71-int	7.44451	18.4843	7.24209	15.32	21.01	15.7722	21.1632	24.8186	22.418	39.749	24.5976	24.1479
HSMAR1	9.24489	15.7271	10.6657	14.6812	14.2699	16.5448	11.102	13.874	19.9987	48.2718	14.487	10.6375
HSMAR2	18.6126	27.0897	15.0862	24.6311	27.7546	18.4619	18.1624	34.4691	23.4637	72.4323	31.2064	28.58
HUERS-P1-int	5.42081	8.61421	3.78463	9.62853	10.1057	4.51045	5.37029	9.79043	8.24049	35.7922	8.497	7.74473
HUERS-P2-int	1.76795	2.02756	1.15078	1.76239	2.16505	2.72969	2.33263	4.17002	3.45942	24.9581	2.99955	2.65594
HUERS-P3-int	15.9859	14.2017	9.1536	14.3263	19.963	13.3151	18.3066	25.9462	19.368	68.5809	22.5046	22.5487
HUERS-P3b-int	8.61461	15.0608	5.83897	11.8501	11.8668	10.3353	11.8203	14.1164	18.7335	42.362	14.5658	12.1795
Harlequin-int	24.6622	34.9358	20.5657	35.4635	41.7351	40.7712	31.1908	41.5242	44.4874	82.4864	37.5479	33.4006
Kanga1	2.2542	2.39268	2.06423	2.31008	2.61703	1.67365	1.65336	3.31938	3.06811	8.97003	3.52517	3.31857
Kanga11a	3.17986	13.0281	8.23697	8.04516	14.672	8.69792	21.8068	26.2027	16.9234	32.4334	20.5475	14.8569
Kanga1a	2.39752	3.50907	1.9599	4.17872	4.85407	3.60486	4.20901	5.00185	4.71711	12.9813	5.81469	4.4485
Kanga1b	0.906646	1.26217	0.509172	1.49823	1.2709	1.47945	0.676749	1.90162	1.40124	5.49092	2.10126	1.70095
Kanga1c	3.18912	7.73096	4.90487	6.22556	8.08854	5.45188	4.32187	6.51854	4.29272	15.2865	6.69513	5.41122
Kanga1d	1.28504	2.42853	1.19759	2.21361	2.37094	1.68782	1.53674	1.94091	1.56325	6.37859	2.52309	2.09458
Kanga2_a	4.85155	7.98909	3.86273	8.70312	10.1625	7.75149	10.5491	13.8387	13.3254	26.5909	12.9261	9.45257
L1HS	28.5728	30.9775	21.7774	28.8729	20.1706	46.6277	34.9039	65.6782	100.6	142.897	58.5341	43.4706
L1M	0.982594	1.61662	0.873662	1.35239	2.12839	1.38777	1.6925	2.33503	2.50273	4.60487	2.53839	2.07756
L1M1	43.9064	69.3374	33.2052	64.485	62.5404	60.7554	45.9652	111.333	92.9875	525.621	101.527	76.0791
L1M2	67.6533	117.081	59.0932	78.1511	83.5771	63.6264	55.3556	92.0367	68.3077	282.358	94.5563	69.3098
L1M2a	2.79025	6.11182	2.21707	4.50185	5.51802	4.77175	3.61687	6.84011	5.16078	35.7691	6.62762	5.2637
L1M2a1	0.536469	0.92606	0	0.95973	0.526464	0.854331	0.464435	1.44638	1.30047	8.15413	1.83714	1.26776
L1M2b	0.746324	1.94288	0.515526	1.66668	1.17997	2.02122	1.20535	3.21341	3.62823	13.8511	7.10103	4.63741
L1M2c	2.41534	3.24543	1.07511	4.80905	3.31698	6.25078	3.63947	5.74302	5.78144	27.7567	5.91175	5.23173
L1M3	25.8752	48.575	27.1191	45.5189	53.4333	33.9132	38.8881	54.6581	52.7514	130.04	57.8886	44.6965
L1M3a	17.3327	18.9036	13.3787	13.7038	13.0205	10.9292	8.48988	11.5481	7.48288	37.5649	16.0654	15.1408
L1M3b	4.47342	8.48041	3.80683	6.60652	8.1946	5.88821	5.57305	7.54289	5.0692	27.7955	7.64086	8.8928
L1M3c	2.23866	4.94276	2.21051	4.44022	5.28574	4.50503	3.83646	7.77024	4.94809	35.8224	7.07863	4.2656
L1M3d	1.41276	3.79075	1.32325	1.66709	3.10314	1.3961	3.37531	4.62913	12.5242	12.6938	4.01273	2.99209
L1M3de	2.97544	11.4593	4.06716	10.855	11.984	7.52269	8.016	10.7844	7.37808	29.5326	12.492	10.0737
L1M3e	1.5144	3.82127	1.36539	4.32131	3.08101	4.355	2.16616	5.26855	4.38528	40.4888	4.67676	3.61654
L1M3f	2.17523	4.01756	1.88202	4.51378	4.49411	4.19664	2.9036	6.8163	5.40543	24.842	6.93447	5.7304
L1M4	100.461	216.973	120.379	175.655	206.257	146.489	149.013	208.26	187.153	492.058	219.604	174.991
L1M4a1	11.0874	17.1834	8.38591	14.6917	16.0802	12.0948	15.9033	27.6022	24.1306	58.679	24.2445	21.0774
L1M4a2	6.35123	12.5642	6.1582	12.052	12.8487	14.9612	12.334	17.3185	15.1803	42.6628	19.0657	13.9133
L1M4b	21.0514	41.6405	19.8142	34.5906	40.5183	26.4001	31.7788	51.5467	45.0985	133.782	51.9001	41.4738
L1M4c	19.4254	38.8298	22.686	30.535	34.3273	29.6036	24.7218	39.0712	35.055	111.198	41.3789	32.6004
L1M5	173.894	299.801	184.344	241.53	315.534	197.219	226.66	329.035	277.975	786.71	342.116	274.266
L1M6	15.5946	17.868	9.65414	16.1549	18.6382	15.2321	17.2191	32.1753	28.595	90.6173	31.0421	24.4692
L1M6B	30.0488	34.0267	37.3498	30.7226	42.5484	17.5242	29.5338	27.4511	13.3538	22.2009	26.2362	26.5412
L1M7	7.85851	13.3446	6.00897	13.2897	13.9294	11.2617	13.5669	21.5494	22.0323	67.3619	21.4422	16.3644
L1M8	6.59319	11.588	3.79317	9.18599	8.78971	8.39661	8.24258	13.8719	10.4747	32.7146	13.7821	11.3954
L1MA1	32.284	65.9426	33.8654	57.4238	86.0179	45.4621	58.9447	79.4948	63.7132	216.327	69.8006	52.9139
L1MA10	12.5743	34.7145	16.0908	24.0074	27.7764	17.3983	16.3027	25.9034	28.4076	71.2283	24.9845	18.4204
L1MA2	35.849	80.6757	31.308	80.3559	86.0496	55.7678	60.7565	108.442	88.1262	353.457	94.1826	66.1686
L1MA3	47.4507	86.7609	39.6717	91.3035	97.7365	82.9463	74.3482	130.673	132.005	442.269	126.507	88.6925
L1MA4	46.0282	84.9174	41.2967	81.0562	91.9334	78.1763	75.0399	115.343	123.177	310.371	123.042	85.1324
L1MA4A	42.1428	71.4921	28.6787	66.5746	65.1662	65.2063	62.4429	94.9091	98.6172	277.918	96.7753	68.2912
L1MA5	36.6183	82.3137	38.2362	65.2268	77.9202	67.9997	55.2292	84.2867	78.5456	178.839	97.1127	68.6582
L1MA5A	24.505	42.9053	21.004	30.8586	36.0832	22.7544	25.8288	37.4061	33.5866	113.933	41.1131	31.5438
L1MA6	20.4339	38.3026	22.4106	32.9655	41.1836	29.1373	41.9794	55.545	48.9789	163.491	58.3805	47.8452
L1MA7	29.4012	51.5254	28.5192	50.021	60.902	37.9865	50.2631	70.6272	74.1404	190.873	74.6209	54.4228
L1MA8	45.8679	77.4252	51.7985	68.305	80.4764	52.8518	60.0227	92.7488	83.5558	301.703	91.3445	69.6586
L1MA9	65.7929	120.772	72.325	111.929	140.152	81.3344	94.9496	147.175	146.487	410.688	145.824	113.215
L1MB1	22.9855	49.1688	24.2237	40.7009	46.4145	33.2564	36.2633	57.3784	48.9392	156.816	58.379	46.9945
L1MB2	57.2772	105.796	56.6312	95.3406	121.107	84.4208	76.9647	111.832	94.446	263.565	127.119	94.4356
L1MB3	110.189	208.513	95.0211	201.558	224.652	163.568	165.3	234.319	254.218	511.843	253.802	215.456
L1MB4	75.4389	112.673	62.0077	99.8493	122.947	101.637	103.534	168.472	133.643	292.089	200.188	159.813
L1MB5	83.33	201.387	118.665	140.482	182.932	110.192	144.203	170.427	172.183	333.425	184.975	155.321
L1MB7	161.941	290.144	146.122	262.197	307.314	226.773	258.365	351.918	354.589	751.833	391.466	305.913
L1MB8	122.68	206.313	110.007	193.523	237.287	154.66	190.024	257.59	243.872	541.628	274.65	222.854
L1MC	23.782	43.5107	26.0117	43.3339	54.4004	39.1713	44.3236	58.9029	45.1884	146.15	61.3041	49.2315
L1MC1	93.9457	184.201	100.383	164.33	202.559	130.04	163.462	221.392	213.275	535.612	238.457	204.561
L1MC2	44.849	62.7018	42.0562	58.5574	67.0387	49.4941	54.0439	77.9365	70.0915	202.692	78.3658	62.0789
L1MC3	70.6081	153.345	82.5031	119.117	157.768	83.7719	99.3654	154.24	140.025	407.739	148.901	120.536
L1MC4	154.003	269.43	137.277	244.85	276.098	184.695	186.794	287.632	281.135	595.494	313.063	255.479
L1MC4a	67.0723	119.963	67.0622	98.4386	120.686	100.033	104.798	146.952	178.461	340.05	168.544	141.017
L1MC5	82.5349	128.284	68.343	120.91	139.684	99.2849	101.792	140.829	154.266	312.642	158.99	127.03
L1MC5a	142.793	194.274	106.274	170.801	209.673	131.876	125.936	188.545	179.559	411.259	208.435	168.213
L1MCa	31.5293	69.0361	40.1084	65.1859	72.7765	54.6988	58.3089	88.6217	71.7189	219.229	98.9758	73.5066
L1MCb	5.74617	9.06213	4.60459	7.64413	9.40249	6.89716	6.84842	14.6312	13.4035	51.1173	11.4907	8.50946
L1MCc	10.5314	21.4675	9.01036	18.8783	18.9877	15.8168	13.2576	24.1332	18.2598	71.0643	23.9352	20.1965
L1MD	109.41	88.9625	90.7575	89.443	102.029	65.1904	70.2168	75.3651	74.3587	185.069	79.8876	62.3906
L1MD1	48.5031	75.9866	38.0824	91.967	93.184	73.9913	72.863	113.792	129.392	253.875	116.999	95.0511
L1MD2	68.2082	137.414	76.8548	123.761	159.627	98.4614	119.354	157.569	169.925	376.244	167.837	137.538
L1MD3	26.0132	41.0103	26.6989	42.2671	51.6313	35.5797	36.3136	56.0297	47.4453	126.001	54.784	46.1691
L1MDa	58.6361	97.4011	53.5501	76.9548	86.3437	54.8018	53.0733	84.9607	74.5159	230.921	85.7803	64.9144
L1MDb	3.09232	4.17083	2.76581	4.17805	3.9051	3.37398	2.69258	5.28913	4.85682	24.0755	4.3391	4.15341
L1ME1	203.142	340.671	198.724	325.103	422.285	297.67	340.586	443.556	445.969	976.588	466.788	367.204
L1ME2	80.9272	145.353	94.3011	122.604	155.629	95.755	109.243	161.159	146.463	356.666	163.725	130.927
L1ME2z	34.9782	60.0338	34.0342	51.583	58.0507	49.7654	43.5714	68.8588	64.939	170.711	79.0543	59.6571
L1ME3	38.1878	71.6691	37.4458	71.0846	78.8104	57.684	63.5864	92.3204	91.3886	213.481	93.3466	77.7458
L1ME3A	77.5987	139.675	80.4398	137.766	156.215	109.404	116.226	165.25	161.678	401.296	176.223	142.089
L1ME3B	61.9015	103.815	69.4282	89.9569	118.874	67.2908	93.6656	117.353	115.917	230.822	127.581	104.529
L1ME3C	8.8019	14.2815	7.86781	15.7394	18.9281	13.6485	15.9794	24.3724	22.2854	56.0795	24.9175	17.4128
L1ME3Cz	43.2553	75.6847	41.7618	67.5586	81.9517	59.5543	69.4567	99.3319	109.677	276.739	106.405	85.6223
L1ME3D	29.8462	38.4027	27.9038	37.7096	45.8915	25.1507	30.2851	39.0045	42.8671	90.7475	41.0273	32.0396
L1ME3E	41.3111	53.5163	41.9258	67.2939	58.7963	42.4698	41.9946	48.7407	58.2872	133.581	55.1449	45.5329
L1ME3F	20.786	40.6388	20.7628	39.5687	45.1479	31.6352	40.533	64.4679	70.362	127.517	80.896	63.5504
L1ME3G	73.8682	125.958	75.3554	116.807	141.538	94.7632	114.328	153.331	156.54	371.402	172.415	138.634
L1ME4a	89.0732	136.482	83.5141	131.499	162.004	103.153	159.857	210.271	190.571	496.227	236.514	183.945
L1ME4b	125.067	225.169	120.507	189.866	229.622	144.144	178.226	234.478	237.727	513.837	260.427	209.997
L1ME4c	36.0357	54.236	34.122	53.3871	64.7839	48.0071	49.0212	78.0003	70.206	162.822	78.4283	68.8591
L1ME5	11.1772	24.0585	11.6423	19.7354	21.0694	17.2321	16.4587	26.4546	25.0083	77.1525	30.4096	26.5704
L1MEa	0.777961	1.64944	0.890898	1.71787	2.46347	2.39629	2.95688	5.51118	6.19565	10.1641	4.87462	3.00016
L1MEb	7.11532	9.23838	5.04269	9.74965	11.4482	9.14759	8.67028	12.9673	11.5918	35.0441	12.8258	9.52592
L1MEc	75.53	156.884	76.1635	135.856	163.471	144.542	115.246	176.77	144.711	445.476	179.79	142.582
L1MEd	61.9175	113.345	65.4875	101.742	125.32	86.6083	104.596	171.773	174.781	372.211	183.743	154.002
L1MEf	58.0829	94.5575	49.3728	82.5924	94.8262	67.0416	70.4054	109.771	95.4253	287.077	116.452	89.6308
L1MEg	50.2264	111.205	53.8687	87.5454	107.2	79.5144	91.1623	131.406	112.46	302.473	135.609	106.353
L1MEg1	2.17525	5.71594	1.95749	3.70587	4.20562	4.48003	2.92562	4.96786	4.66496	19.8985	6.00745	3.62873
L1MEg2	5.30993	10.7661	7.17663	8.12918	12.183	5.73027	8.6412	11.7445	7.99491	21.5594	10.1993	9.62411
L1MEh	6.83439	11.8982	6.98127	10.5184	11.9013	10.7329	10.2794	16.4256	19.4261	58.7464	16.0408	13.798
L1MEi	14.4395	24.242	12.8306	20.4877	28.8565	19.0262	21.0704	35.4623	37.8809	99.9389	35.6172	29.1641
L1MEj	11.2334	16.4196	8.71564	13.8455	17.7326	11.1451	13.1995	17.3101	18.8863	50.1487	18.5389	15.8359
L1P	0	0	0	0	0	0	0	0	0	0.487619	0	0
L1P1	15.2862	27.8866	12.7423	20.4711	23.4048	18.789	18.7356	43.3592	23.9251	154.285	33.2509	26.2487
L1P2	21.8341	37.0258	14.9212	30.1196	33.7504	28.6709	21.9109	52.6457	30.6466	144.726	34.6173	34.9125
L1P3	18.3724	30.5891	16.387	24.5749	26.561	21.5775	17.7016	40.9397	29.4357	165.681	34.2673	28.2272
L1P3b	0	0	0	0	0	0	0.445418	1.07185	0.47507	4.8203	0.704311	0.474557
L1P4	9.68611	21.0395	9.68546	17.61	21.369	11.173	13.1372	25.9208	25.9457	76.6819	22.7134	16.121
L1P4a	3.38347	3.58906	1.34507	2.88702	3.24951	3.58777	2.9225	7.03254	4.25098	40.5835	6.1782	5.40291
L1P4b	0.632605	1.80865	2.22567	2.97687	3.17249	3.36815	2.27806	2.47917	1.04182	13.1602	1.98115	2.20116
L1P4c	0	0	0	0	0	0	0	0	0	1.8933	0	0
L1P4d	0	0.742913	0	0.757998	0.465574	0.729307	0.880216	2.10595	1.32118	11.0921	1.30909	0.725029
L1P4e	2.93075	4.90134	3.07281	3.54603	3.63614	3.66737	1.505	3.53358	1.18923	13.706	2.84637	2.42853
L1P5	0.726228	1.10888	0.513388	1.29761	1.42272	1.08479	0.629689	1.52133	1.13216	2.89786	1.23584	1.02445
L1PA10	275.001	174.562	172.796	234.172	177.347	123.958	214.639	238.866	564.983	686.685	250.272	271.521
L1PA11	38.4952	68.167	28.2725	63.6632	67.9563	51.3749	38.208	73.5541	59.1006	241.615	71.4027	51.9883
L1PA12	15.3611	28.4247	10.2824	33.2845	26.1859	29.0814	18.0932	38.8821	23.1593	100.95	33.1467	28.867
L1PA13	52.0967	99.704	40.562	76.4061	79.6493	67.748	68.5772	116.953	110.82	433.566	112.831	83.2011
L1PA14	18.2586	33.2187	17.9747	31.5182	35.3542	31.8249	29.0754	53.7388	38.1679	159.642	49.5339	38.5463
L1PA15	41.2203	67.9208	32.417	67.3231	72.4202	59.1339	55.4439	106.181	92.8181	392.556	94.0771	66.5983
L1PA15-16	3.41293	6.31406	2.97945	6.90451	7.08919	7.75107	5.37199	14.4333	7.26853	86.0327	10.5346	9.44774
L1PA16	83.9054	129.017	64.8659	117.566	132.916	110.487	103.336	175.513	137.758	592.249	167.778	126.297
L1PA17	26.3056	46.2459	22.2628	47.1024	52.1	43.6696	32.7193	57.1189	53.9248	191.991	60.8062	44.3387
L1PA2	30.4871	57.7705	24.4116	48.759	59.8534	46.854	51.2115	91.7441	83.4667	340.112	79.7145	61.9519
L1PA3	96.2824	199.17	84.4229	157.936	219.592	130.511	151.412	260.902	211.546	826.784	229.194	185.329
L1PA4	105.624	210.638	89.9708	168.702	219.261	138.73	175.934	328.256	232.958	956.545	275.871	228.653
L1PA5	105.321	208.49	84.8064	170.865	205.673	149.435	151.18	296.551	221.552	899.941	265.275	215.652
L1PA6	78.8227	188.226	67.3723	154.168	168.043	127.359	149.391	236.804	186.422	685.441	213.083	162.784
L1PA7	233.604	295.601	144.714	235.198	264.476	236.71	206.722	378.64	325.936	1224.67	347.586	268.364
L1PA8	41.293	86.0722	33.1683	67.5717	79.655	70.2693	60.8164	108.555	116.548	415.074	105.638	80.0323
L1PA8A	17.238	47.5396	22.0088	29.0685	33.8131	29.6324	29.3166	49.6487	45.1177	186.012	45.0112	32.9779
L1PB	6.7185	10.2716	4.8834	10.4745	13.2827	7.91277	6.64152	15.8229	9.72058	44.8447	13.4338	8.9434
L1PB1	72.0762	135.082	51.4602	146.968	151.819	137.5	114.854	234.549	175.699	648.424	221.287	154.578
L1PB2	10.7513	18.706	7.55942	20.2696	21.5953	20.0868	15.0967	29.7296	27.2047	97.9702	28.3283	19.2334
L1PB3	12.7785	23.4729	10.1601	22.6195	26.3168	21.8392	19.7491	38.7112	34.9419	138.453	34.8486	26.0727
L1PB4	30.0873	43.3486	24.4197	45.4128	47.654	39.2342	38.4614	72.9057	71.4268	268.415	68.4613	49.8227
L1PBa	14.1565	23.3602	9.35996	21.6319	21.1564	19.9818	15.2896	32.9907	24.7876	160.555	31.3965	22.3473
L1PBa1	3.41916	6.46572	1.81658	6.19619	5.2978	5.03847	2.92687	8.50774	5.99316	42.5616	6.03424	4.87328
L1PBb	1.98528	2.27858	0.873912	2.22736	1.94164	3.77156	0.946723	3.31889	2.85047	22.1759	5.37677	3.96621
L1PREC2	36.3731	64.7102	25.4797	61.4518	67.13	53.1494	49.7792	107.544	90.3204	363.963	103.526	82.8103
L2	287.929	531.224	244.688	539.037	590.901	481.432	580.21	710.363	1142.18	1464.82	762.024	637.365
L2-1_AMi	3.10965	5.98671	2.97913	6.64189	7.72505	5.89697	9.07155	11.5811	15.002	16.6724	10.8991	9.18073
L2-1_Crp	0	0	0	0	0	0	0	0	0	0	0	0
L2-2_Mam	0.76876	1.26638	0.481595	0.935761	1.26085	1.14605	0.818299	1.49124	0.878492	5.85875	1.60802	1.48358
L2-3_AMi	0	0	0	0	0	0	0	0	0	0	0	0
L2-3_Crp	6.28973	13.2062	4.85477	15.0214	16.4327	13.6068	17.1115	23.3482	37.4741	39.546	26.1674	19.8879
L2a	792.621	1473.54	700.805	1462.71	1635.61	1326.59	1516.88	1901.4	3076.89	4195.76	2077.09	1806.59
L2b	372.794	716.405	321.662	719.765	756.34	710.385	739.454	977.272	1386.66	2162.28	1036.2	942.903
L2c	515.054	958.006	444.338	952.049	1041.47	870.665	1029.32	1326.9	1899.87	2897.58	1471.23	1293.65
L2d	114.131	161.899	78.7838	169.685	165.093	139.241	159.313	208.674	303.194	491.458	228.958	196.957
L2d2	179.198	305.322	144.191	296.295	314.737	264.692	294.838	388.825	590.441	906.734	423.352	362.737
L3	215.444	372.075	182.226	310.406	355.969	270.336	281.712	418.89	421.239	857.017	426.752	394.397
L3b	37.4058	54.2291	28.9278	46.9507	53.8525	40.6949	41.3841	65.524	61.2429	134.027	66.7004	61.9429
L4_A_Mam	35.114	52.2843	26.8683	53.1594	64.5241	42.734	64.8121	81.193	67.5916	155.103	81.9232	69.5207
L4_B_Mam	12.1937	19.9256	8.77664	17.6962	19.5399	17.1491	17.5107	26.6311	25.3879	63.2294	28.3138	23.326
L4_C_Mam	17.0426	26.9361	13.7717	24.9359	27.2969	24.3584	23.2264	38.5111	42.6315	101.898	40.0226	34.5549
L5	2.02643	3.78267	1.62817	3.63807	4.07821	2.0629	1.98824	4.78547	3.86017	12.0313	4.66365	3.97124
LFSINE_Vert	7.11603	14.3048	8.4397	11.8258	14.0607	15.3571	25.1348	30.1733	105.31	113.253	52.8183	30.9713
LOR1-int	32.8489	50.0121	40.8807	22.8079	31.8263	19.0245	26.8232	37.1355	22.2091	57.6737	34.9698	38.0472
LOR1a	2.84193	5.62679	3.22996	6.24112	6.61593	6.38998	5.2714	8.51407	11.3221	26.5911	7.92276	7.16993
LOR1b	3.87767	9.69435	4.65067	5.18736	8.54302	4.19497	4.94143	8.26643	8.96047	29.9622	6.83013	6.2161
LTR06	0	0.408635	0	0	0	0	0.589864	0.452876	0.580368	2.15483	0.479865	0.527148
LTR1	0.463971	0.614177	0	0.763412	0.504159	0.812656	0.686518	2.02431	1.80159	16.2325	1.33062	1.5654
LTR101_Mam	2.1115	6.30962	3.09765	5.66308	6.25662	4.355	4.90688	8.45869	7.91072	26.8095	7.65025	7.9771
LTR102_Mam	1.1258	1.41891	0.706199	2.31553	2.17899	1.85452	2.52232	4.10398	2.97255	16.1534	4.5886	3.78952
LTR103_Mam	2.35374	2.6676	2.03347	3.48294	4.18581	3.24896	4.68247	5.62557	5.31653	13.986	5.98848	6.51853
LTR103b_Mam	0.558212	1.43218	0.602386	1.68033	1.36299	1.77117	1.43624	2.85574	2.96785	9.38806	2.33326	1.69277
LTR104_Mam	3.74548	6.86374	3.10243	5.51977	6.82519	6.64711	6.67047	10.8876	7.57484	37.9815	9.30479	8.49838
LTR105_Mam	1.63566	3.51102	1.55702	2.64642	2.88494	1.96538	2.86912	4.14537	2.99564	17.492	3.38989	3.72627
LTR106_Mam	0.831208	3.88898	1.95826	2.56595	4.49539	2.02122	4.53419	7.82275	3.17961	8.15354	5.19848	4.9567
LTR107_Mam	0.608411	1.76726	0.708823	1.60883	1.70411	1.2294	1.32487	1.90021	3.03336	6.06898	1.86334	1.56199
LTR108a_Mam	2.03002	5.64124	1.77894	4.69871	5.91697	2.31211	2.15912	2.56014	1.58416	2.16808	1.98772	1.80285
LTR108b_Mam	0	0	0	0	0	0	0	0	0	0.744126	0	0
LTR108c_Mam	0	0	0	0	0	0	0	0	0	0.581525	0	0
LTR108d_Mam	0	0	0	0	0	0	0	0	0	1.26633	0	0
LTR108e_Mam	0	0	0	0	0	0	0	0.477004	0	2.55117	0.435324	0
LTR109A2	0	0	0	0	0	0	0	0	0	0	0	0
LTR10A	2.47064	2.66258	1.51673	3.25769	3.51739	2.54924	3.02061	3.47447	9.43723	11.6796	3.65618	3.46375
LTR10B	1.77718	0	0.458369	0.598291	0.476447	0.479259	0.443644	0	0.660149	1.69844	0	0
LTR10B1	0	0.480495	0	0.545499	0.498945	0.520933	0.741198	0.959901	1.81808	3.9057	0.791002	0.864847
LTR10B2	0.489435	0.543609	0.536859	0.419157	0	0.562608	0	0.528868	0.567599	2.24232	0.687474	0.623626
LTR10C	3.9902	7.57946	2.99095	6.99495	7.03774	5.53481	3.39261	7.01158	6.80364	15.65	6.55349	6.2464
LTR10D	1.05986	1.27127	0.655399	1.49661	1.11608	1.7295	0.927669	1.67116	2.54433	9.44054	2.31817	1.11644
LTR10E	1.83019	3.71123	1.57582	3.13582	4.47022	2.10457	3.90108	4.08403	4.59785	9.01687	4.09821	4.03819
LTR10F	1.00556	1.07321	0.511281	1.71159	1.3228	3.1381	2.38994	3.04966	6.79403	12.9136	2.89156	2.66206
LTR10G	0.809641	2.2441	0.732794	2.46405	3.34642	2.35795	1.8303	2.05295	2.12645	2.61246	2.12431	2.08267
LTR12	3.76455	7.9703	3.53572	7.86049	9.39125	9.79771	8.15221	13.1758	9.37739	46.9482	11.2078	11.8474
LTR12B	0.855663	1.04179	0.468127	1.36334	1.24836	1.68782	1.99547	1.80766	4.37247	6.03022	2.13851	2.41915
LTR12C	43.6101	72.4041	34.9652	70.4651	66.0445	82.6479	57.0649	95.3452	65.8746	341.198	81.7965	82.0037
LTR12D	2.55082	6.44894	2.71544	5.63099	6.26188	5.76986	4.72408	7.6703	5.25321	29.1102	7.12123	7.45223
LTR12E	3.10231	3.91963	2.24729	4.76042	2.61692	3.97535	1.3085	3.03349	2.56075	11.5767	2.80497	2.38444
LTR12F	2.28572	5.0652	2.77076	5.67598	7.96979	5.18141	5.8301	8.43158	6.72219	20.1327	7.82406	6.28615
LTR12_	3.30117	6.18705	3.39895	5.03574	6.24733	6.31288	4.49038	7.26607	5.17345	23.8829	6.85204	7.06015
LTR13	24.8345	52.325	29.5777	53.006	63.9605	45.3362	43.9856	51.1782	52.1427	99.0495	47.5587	45.9976
LTR13A	6.21679	12.8425	10.3019	15.2603	14.8803	20.0851	10.3549	12.6466	17.7637	21.5187	13.9515	12.7645
LTR13_	0	1.08924	0.777995	1.40138	1.69355	2.27127	1.30545	1.24485	1.40684	4.50218	0.980798	1.07828
LTR14	2.28131	4.72265	3.80432	4.58189	6.07122	4.94887	3.56678	3.66463	6.58663	4.23456	3.94034	3.81531
LTR14A	0	0.688925	0	1.14286	1.02369	1.08354	1.46	1.24274	2.30587	2.05741	1.11791	1.43658
LTR14B	1.67557	3.41352	1.56978	3.48765	3.48573	2.79179	2.71188	3.54409	6.00516	9.41156	4.11009	4.15561
LTR14C	0	0	0	0	0	0	0	0.746612	0.596397	2.14053	0	0.430927
LTR15	1.46804	2.32493	1.30649	2.56015	3.36932	2.67926	2.66903	3.34519	5.23503	6.82193	4.22839	3.05603
LTR16	8.1489	18.2672	8.9385	15.2897	16.1953	12.8566	13.2946	22.5329	19.7226	90.7472	19.3854	17.7014
LTR16A	11.909	20.8835	9.83599	19.8143	20.4254	20.1914	19.6234	31.4347	33.4747	113.598	33.1092	31.7343
LTR16A1	6.04224	11.5748	4.19575	11.5176	12.059	17.2533	12.5794	20.5588	18.2812	80.0088	17.9148	15.9884
LTR16A2	3.78467	8.35738	4.04442	6.73514	7.31296	6.29246	6.49691	9.49983	13.5723	47.3434	9.69075	9.84232
LTR16B	3.16781	7.11374	2.68577	4.96335	5.1118	4.63631	3.93157	5.72679	5.92749	19.3947	6.06969	6.0201
LTR16B1	4.19795	6.4979	2.75809	6.3618	8.4065	7.02218	6.67757	11.2684	10.017	36.3708	9.66678	11.0654
LTR16B2	5.06456	7.88597	3.55861	7.7447	8.26018	6.14701	6.36042	11.1377	11.1923	43.1657	9.43699	8.41447
LTR16C	35.2443	55.2829	27.9015	47.1765	50.9419	38.7437	52.1401	70.6616	58.9337	202.951	66.4225	68.0183
LTR16D	3.22794	5.73147	4.1889	6.80556	8.56222	6.35539	7.83415	8.67534	9.83709	30.5795	9.6936	9.23276
LTR16D1	1.28267	3.27029	66.5811	20.3577	7.4917	2.0208	1.32243	1.96206	8.14109	7.3863	4.41286	2.13483
LTR16D2	1.46928	1.53148	0.88496	2.14451	1.53714	1.2294	1.74917	2.03081	3.09054	8.16939	2.45761	1.48153
LTR16E1	4.06295	7.75905	3.3001	7.22654	7.70307	8.52164	8.56121	15.3304	12.8391	58.6855	14.3254	11.985
LTR16E2	4.18749	7.62394	3.72423	8.55357	9.39769	8.50163	8.07889	14.6865	13.7284	67.2311	14.4788	12.6753
LTR17	10.9006	10.3951	9.82039	10.7862	11.2868	10.3849	10.9137	10.8889	12.9226	44.1644	10.7978	10.9557
LTR18A	1.26797	1.37686	0.667349	1.01188	0.766786	0.687632	0.523366	1.21489	0.753793	3.65776	1.08588	0.901623
LTR18B	1.1834	1.9329	0.909881	1.9971	1.90741	1.43778	2.04101	2.27848	3.01347	15.2633	2.70928	2.55981
LTR18C	0	0	0	0	0	0	0	0	0.441595	1.33098	0	0
LTR19-int	2.11832	3.98121	1.45364	2.58259	3.78329	2.72969	3.15403	4.94864	4.67257	11.1206	4.85894	3.89808
LTR19A	2.72127	3.30455	1.60038	3.31976	5.1803	4.6884	3.72765	6.57505	8.04426	10.3303	4.54018	4.17248
LTR19B	0.849326	1.14592	0.895324	1.46427	1.52083	1.43778	1.32215	1.74607	2.2597	8.34073	2.06002	1.49313
LTR19C	0	0.509584	0	0.588412	0	0.604283	0	0.968006	0	3.81126	0.511334	0.74426
LTR1A1	3.91317	7.05405	4.53419	9.33134	9.50203	5.3131	5.51585	5.83717	8.62869	26.3802	4.96054	5.48501
LTR1A2	4.72808	7.04004	3.29602	7.30617	6.29717	9.89815	7.07163	17.5044	9.23566	55.25	15.8093	12.8151
LTR1B	1.15656	1.5184	0.813289	1.57552	1.5456	1.81326	1.48012	2.55483	3.9407	22.3632	2.42528	2.20349
LTR1B0	0	0.418945	0	0.464241	0	0.479259	0	0.971343	0.781566	5.90121	0.716152	0.647555
LTR1B1	0.788386	1.16708	0.518811	1.16303	1.16319	1.7295	0.934004	2.36349	2.5596	11.889	1.90543	1.92704
LTR1C	0	0.472394	0	0.494762	0.429041	0.604283	0.642264	0.908421	0.73945	4.98383	0.871616	1.2573
LTR1C1	0	0	0	0	0	0.604283	0	0.856631	0.869789	3.00536	0	0.47532
LTR1C3	0	0	0	0	0	0	0	0	0.427824	2.33506	0	0
LTR1D	2.68037	2.7347	1.77786	4.49056	3.9431	4.06286	3.31973	4.8966	6.22243	29.5562	4.4906	4.18209
LTR1D1	1.86689	2.6185	1.31657	2.96783	2.84303	3.02141	2.50611	5.21775	4.35035	23.7936	4.48762	4.65534
LTR1E	0.983843	1.15476	0.441298	1.42512	1.58592	1.3961	1.24852	2.93513	2.70995	20.3777	1.95375	1.66634
LTR1F	0	0.46076	0	1.03171	0.49641	0	0.622868	1.05005	1.1026	10.3555	0.795778	0.699893
LTR1F1	0.808375	0.680848	0	0.99676	0.792063	0.854331	0.705385	1.93267	2.15443	13.9823	1.37727	1.35076
LTR1F2	0	0.42194	0	0.722307	0.450861	0.604283	0.553783	0.78414	1.26944	7.69325	1.12441	0.741265
LTR2	9.6214	16.3239	9.52743	15.0867	16.0516	21.2987	13.9454	16.3566	30.6929	32.1655	17.4732	16.7619
LTR21A	1.66774	2.9725	1.47777	2.3082	2.52231	1.85452	1.58112	1.03363	1.72672	2.31798	1.40579	1.07919
LTR21B	0	0	0	0	0	0.437584	0	0	0.672468	0	0	0
LTR21C	0	0	0	0	0	0	0	0	0	0.904752	0	0
LTR22	0.726095	2.03427	2.31284	1.26576	1.11512	1.18773	0.773453	0.830969	0.49606	2.91105	0.710885	0.597385
LTR22A	0.770876	0.998291	0.412257	1.3327	0.884025	1.35443	1.04581	1.14166	1.13828	4.75867	1.2325	0.944196
LTR22B	0.812083	1.18797	0	1.24042	1.09064	1.10438	0.620297	1.79758	2.46019	2.30824	1.91776	1.43959
LTR22B1	0.40789	0.507011	0	0.757572	0.65385	1.81285	1.55416	1.58142	2.09561	4.49724	1.43928	0.766009
LTR22B2	0.705511	2.08188	0.773985	1.23964	0.981942	0.854331	0.532512	0.666625	0.738812	1.99004	1.08327	1.08862
LTR22C	0	0.464979	0	0	0	0	0.4369	0.707852	1.14841	0.780045	0.636819	0.674915
LTR22C0	0.42801	0	0	0.468197	0.497083	0.645957	0.464873	0.631786	0.659623	2.47594	0.87074	0.637676
LTR22C2	0	0	0	0	0	0	0	0.764904	0	1.64914	0	0
LTR22E	0	0	0	0	0.548889	0	0	0.758943	0	1.43379	0.473662	0
LTR23	3.72698	3.94154	2.29943	4.23904	4.74929	3.22979	3.26245	4.09654	5.67446	13.8124	4.70327	3.79204
LTR23-int	0	1.22484	0	1.12952	1.08071	0.909758	0.788255	1.02745	0.918236	3.84261	1.2674	1.08496
LTR24	2.67105	5.07561	2.30707	5.24392	7.11629	5.73027	6.43951	5.74402	8.6808	9.79912	6.24047	6.07392
LTR24B	2.51526	3.42606	2.40174	4.03264	4.38568	5.23017	4.69392	6.16163	10.2611	14.0924	8.47127	7.42116
LTR24C	1.04227	1.50902	0.554914	1.68445	1.41529	1.5628	1.35198	2.51926	3.05949	6.81985	2.10207	1.99233
LTR25	3.87382	2.57499	1.45026	2.66087	2.85397	4.60505	2.11599	2.60646	4.33104	6.7581	2.93794	3.17704
LTR25-int	6.07865	7.76449	3.89773	6.88647	7.45425	5.54231	5.60468	9.48161	12.3575	35.432	9.00075	8.65824
LTR26	1.38735	3.24275	1.45516	2.71437	3.64636	4.14705	3.28782	6.28869	7.72246	20.658	5.00955	4.39298
LTR26B	0.605792	1.05347	0	0.777124	1.25491	0.854331	1.45763	1.01624	2.75462	3.87645	2.1437	1.7318
LTR26C	1.03953	1.28712	0	1.04699	1.27962	2.18792	2.79348	2.80036	4.0901	9.04978	2.86035	1.87052
LTR26D	1.54654	1.6804	1.37375	1.24915	1.57627	1.43778	2.1587	2.02586	4.0905	6.41217	2.94371	2.36491
LTR26E	0.559084	0.526582	0.457249	0.714159	0.648133	1.47945	0.889171	1.02314	1.81282	3.214	1.11893	0.885402
LTR27	0.95457	1.47214	0.731928	1.45454	1.36552	1.47945	1.38071	2.63992	3.34414	13.327	2.77821	1.84178
LTR2752	1.58969	1.85453	0.584	1.82776	1.73153	2.27127	1.42909	3.06146	2.94507	26.5473	2.36952	2.74632
LTR27B	2.56467	3.40922	3.06375	4.06642	6.585	5.1885	3.63408	3.17036	2.63304	7.1622	2.87413	3.2832
LTR27C	0.476154	0.651409	0	0.922732	0.544363	0.93768	0	1.28711	1.58108	4.80697	0.871741	0.661865
LTR27D	0	0.405388	0	0.658957	0.743028	1.0627	1.04324	1.75038	2.09022	10.1006	1.35509	1.60861
LTR27E	1.09097	2.15348	1.07918	2.21196	2.18134	2.22959	1.74417	2.33741	2.39527	12.029	2.18618	2.16358
LTR28	0	0.467725	0	0.464268	0	0.437584	0.4883	1.45703	1.64194	8.41991	1.29841	1.03619
LTR28B	0.969925	1.0812	0.451345	1.33974	0.919573	1.93787	1.60138	2.52488	3.46577	18.8232	2.43372	2.49633
LTR28C	2.57027	3.21697	1.84659	3.24167	2.52179	2.22959	2.089	2.80866	3.55902	20.5197	3.83553	3.16565
LTR29	1.91491	4.77364	4.08996	5.34515	7.79351	3.8124	8.02126	18.7378	92.3641	23.8176	11.759	8.56895
LTR2B	4.84325	8.19255	6.99426	9.23883	11.5769	8.28576	5.95282	6.79623	7.01664	13.5991	4.83286	5.43338
LTR2C	3.55295	7.3649	5.83917	7.50207	10.6476	4.94303	7.21546	7.83301	7.63359	7.11366	6.34611	6.074
LTR3	0.727509	1.85714	0.726199	0.691025	0.874935	0.423415	0.742118	1.07918	0.610766	1.98017	0.927498	0.807943
LTR30	0.926187	0	0	0.44613	0.728117	1.45861	0.712515	0.993445	2.14409	4.70404	1.15501	0.966911
LTR31	1.39385	4.8967	1.71976	3.82824	4.22173	2.89639	2.71041	3.87422	3.98232	11.6112	4.0685	3.61401
LTR32	3.99002	6.14366	2.73232	6.60183	7.37786	8.85587	7.11028	10.6584	10.9665	35.3345	11.1126	9.5858
LTR33	28.7611	64.1126	33.1362	57.7937	64.0083	61.4505	61.0271	77.6136	84.903	268.041	79.9004	75.6643
LTR33A	3.61893	7.10706	3.10931	7.17787	8.04677	7.59479	7.7475	10.4402	13.8911	50.5203	11.2654	9.95844
LTR33A_	4.04087	7.94517	4.15599	7.5879	9.18219	9.10591	6.7938	10.2981	10.3213	52.2285	10.3292	9.79955
LTR33B	3.64	6.93067	2.63362	5.98199	7.21463	5.74152	5.3926	7.37322	8.10906	24.9483	6.9795	6.82467
LTR33C	4.55646	8.36129	4.57641	5.49828	6.62068	4.78217	4.54694	6.93909	5.54603	25.9886	6.19945	6.02595
LTR34	0.857895	2.41603	1.02803	1.89488	3.66277	1.93787	2.52223	3.7443	4.55794	8.3303	3.79345	3.12358
LTR35	1.13496	2.04522	0.635391	2.06875	2.26935	1.60447	1.47329	1.36832	2.73642	2.67628	1.63775	1.71617
LTR35A	0	0	0	0.836641	0	0	0	0.546143	0.844016	2.82038	0.672721	0
LTR35B	0	0.796414	0	0.933707	0.760098	1.27108	1.27907	2.00841	1.46316	4.13018	1.51008	1.46376
LTR36	1.20516	1.9425	0.916219	2.33109	2.23766	2.14625	3.65885	4.61635	6.96992	17.5054	6.11911	5.2394
LTR37-int	5.22457	8.04904	4.93075	7.16009	10.0049	7.60563	7.28176	11.2727	7.65623	30.7289	10.2994	10.0756
LTR37A	3.51816	6.17198	4.03597	5.97039	8.23408	6.48083	9.54366	14.0945	15.2766	32.3217	12.8222	9.86218
LTR37B	2.54651	5.26264	2.88725	4.41585	7.06542	4.56338	5.27653	7.59495	7.42959	27.5154	7.58933	6.68622
LTR38	0	1.13931	0.446984	0.785397	0.951496	1.31275	0.658194	1.25124	2.71431	8.57924	1.66536	1.97447
LTR38-int	0.562828	0	0	0	0	0	0	0.513819	0.877477	4.53841	0	0
LTR38A1	0.668544	1.08217	0	1.00939	1.18867	1.77076	1.302	1.12761	1.51953	4.71658	1.14888	1.10499
LTR38B	0.712281	1.01358	0.961971	0.807796	2.34244	1.52113	2.93655	2.64329	4.15712	8.7241	2.65184	1.99326
LTR38C	2.11409	2.88459	1.74899	3.04874	3.72517	3.97993	4.60571	3.84432	3.71598	9.21274	6.08332	3.61348
LTR39	4.30721	8.2252	3.69366	7.13858	8.75428	6.89674	8.0047	11.9796	13.8642	31.6062	13.1324	11.2919
LTR39-int	0.516622	0	0	0	0	0.770981	0	0.56297	0.667415	3.60466	0	0.499677
LTR3A	1.51109	2.84474	0.994795	3.62067	2.86912	2.01414	1.05226	2.58306	2.04899	5.73667	2.48723	2.04705
LTR3B	0	0.586883	0	0.751214	1.12064	1.02103	2.19838	2.08044	0.574018	1.87421	1.70025	1.02124
LTR3B_	0.715631	0.883791	0.421648	0.958937	1.34875	0.979355	0.879457	1.36569	1.46353	7.35052	1.53362	1.01838
LTR4	0	0	0	0.656144	0.542271	0.687632	0	0.718839	1.32474	5.26291	0.893971	0.62154
LTR40A1	1.12427	1.13542	0.645896	0.908436	1.2375	1.0627	0.732591	1.83686	2.5278	10.3136	2.20389	1.40276
LTR40a	6.14325	10.5414	5.15698	10.0027	10.6442	7.27181	7.5574	14.1286	11.3316	47.6875	12.415	11.7391
LTR40b	4.14737	7.79814	4.42536	6.75944	8.16274	6.02199	4.97817	7.91785	6.94273	23.4242	8.37019	7.43145
LTR40c	2.21511	4.86682	2.60171	4.17757	5.28111	4.25082	4.02712	5.75671	6.91364	17.7861	5.3821	5.62304
LTR41	6.95013	11.6984	5.19634	11.4916	12.4506	11.6381	10.1936	15.6903	13.7869	45.1341	17.2185	16.1609
LTR41B	8.68141	10.6314	6.98455	10.2861	10.0904	8.04321	7.57212	10.0462	10.2271	41.7386	9.78957	10.057
LTR41C	3.7204	4.19944	2.22508	4.39278	4.93739	3.52151	4.34502	6.45462	9.3342	28.3589	9.01002	7.90667
LTR42	4.50935	11.5259	4.92508	8.17792	8.07992	5.77194	7.15372	8.31404	8.70385	15.024	9.12168	8.63259
LTR43	3.90253	8.30386	3.65507	7.83941	8.1154	5.93864	5.45105	8.82604	10.8972	16.4179	7.86783	6.84012
LTR43-int	0.888642	0.738827	0.510442	1.81521	1.79996	1.91662	0.93098	1.33152	1.10939	9.77379	1.3639	1.26715
LTR43B	0.521601	0.690892	0	1.21638	1.01306	1.06229	0.831305	1.98593	2.04722	6.09658	1.86043	1.44118
LTR44	1.26536	3.20966	1.25922	2.12002	2.62029	1.68782	1.24617	1.8877	2.01204	5.86099	2.12022	1.87069
LTR45	0.609749	0.86553	0.485802	0.549489	0.778656	0.770981	1.05814	1.16093	1.79236	4.38402	1.3346	0.932333
LTR45B	1.54234	2.63362	1.11379	3.00163	4.02016	4.52087	3.36992	4.05608	4.41078	14.3366	4.23059	3.55819
LTR45C	2.48212	3.932	2.4207	4.4045	5.32086	6.51542	4.52507	5.88162	9.17202	13.0547	5.26655	4.68323
LTR46	3.66875	5.82845	3.49283	4.0408	3.80355	3.86366	3.34878	4.16584	5.97874	6.41884	3.87068	4.85003
LTR46-int	1.05589	3.3886	0.811082	2.9058	3.07938	5.98865	2.00071	2.51736	1.80511	10.2929	2.72195	2.90272
LTR47A	2.94174	4.76065	2.71331	4.72362	5.53119	3.27146	3.94169	5.51478	6.95161	16.5496	5.19554	4.44186
LTR47A2	1.77163	3.94078	1.84791	3.11119	2.25796	1.85452	1.26284	2.1364	1.77115	4.05417	2.06056	2.02065
LTR47B	0	0	0	0	0	0	0	0	0	0.681475	0	0
LTR47B2	2.62984	5.3643	4.42496	4.61204	6.89444	5.5494	6.18485	7.16667	9.47537	10.1672	9.34713	7.47889
LTR47B3	0.578896	0.97869	0	0.980214	1.95093	0.812656	1.05782	0.8833	2.18679	2.92918	1.24249	0.67223
LTR47B4	1.09786	1.1708	0.558992	1.45458	1.59751	1.18773	1.60995	2.20969	2.0917	3.30122	2.10441	1.5274
LTR48	4.87008	8.96994	4.85787	7.17963	9.76662	4.89677	6.66957	9.37577	11.6628	25.0363	8.52453	7.75973
LTR48B	3.24573	6.83777	3.71526	6.95798	10.1298	10.8983	36.6677	36.7813	33.7635	61.1705	40.5739	32.7618
LTR49	3.57979	6.44756	3.34691	6.92653	8.42988	6.35955	6.95404	10.6865	10.5375	29.9336	9.90402	8.42392
LTR49-int	7.55046	16.0353	8.12637	13.1217	18.7243	12.4191	13.5283	21.1635	17.7865	57.1333	19.067	15.925
LTR5	0.489601	0	0.402814	0.704201	0	0.426332	0.500671	0.511352	1.89265	0.685821	0.824061	0.56582
LTR50	7.10175	15.9367	8.07783	16.6197	19.0669	20.5039	22.408	26.0126	27.0285	84.5042	23.799	24.8955
LTR51	2.20172	3.63085	2.16957	3.54497	5.1211	3.60486	2.88971	4.99148	5.85938	17.4898	4.27095	4.03647
LTR52	4.93442	7.28213	3.54637	5.77735	6.23984	4.62589	4.24491	7.61881	6.37163	20.439	5.98373	5.42886
LTR52-int	2.73152	4.16956	2.71939	3.9296	4.79664	4.355	4.3183	4.60348	5.25919	12.0035	4.16684	4.4677
LTR53	3.39667	9.28434	4.29112	7.2956	8.06392	6.77255	4.15789	6.86907	8.43245	21.1467	9.18665	8.14694
LTR53-int	6.70477	20.8703	7.1202	11.198	10.8492	5.98031	8.94042	13.2059	7.93924	30.3001	10.4622	12.0763
LTR53B	0.705642	0.694372	0	0.834495	0.982657	2.27127	0.991173	1.42999	1.69224	5.94069	1.69492	1.30506
LTR54	3.91661	6.66531	3.02914	6.59737	8.46548	5.37603	7.33418	9.47052	9.7321	20.3545	8.99877	7.59341
LTR54B	1.74723	3.76422	1.40114	3.6695	3.85063	3.33397	2.59842	4.30456	5.33732	14.2107	5.25347	4.04653
LTR55	1.53647	2.95992	0.864783	2.6047	3.83861	2.85471	2.8222	3.7861	4.15045	16.5502	3.31776	3.2586
LTR56	4.5372	8.83409	4.64605	6.90554	7.52798	5.67442	5.87708	8.68294	8.28219	22.9823	8.28339	8.21963
LTR57	1.26897	1.4946	0.64564	2.30445	2.12636	1.2294	1.01157	1.95166	0.864169	4.60512	1.71032	1.25384
LTR57-int	9.61402	21.2941	17.1292	6.32703	9.47565	3.02141	5.27472	9.91175	3.00192	13.0827	6.57974	10.2196
LTR58	0	0	0	0	0	0.770981	0.630808	0.504009	0.607179	3.21616	0.836035	0.54593
LTR59	0	0	0	0	0	0	0	0	0.592287	2.51358	0.416884	0
LTR5A	22.9189	53.3799	37.262	50.4455	66.9533	42.7828	55.1212	50.4132	53.7511	56.2496	48.2323	51.1978
LTR5B	13.4104	30.7397	13.8994	34.7533	37.066	27.4511	27.5212	28.1624	34.1303	49.4602	33.7437	32.1979
LTR5_Hs	31.7026	48.9294	37.1236	48.7988	54.4734	40.3152	46.4395	44.103	66.14	78.9273	54.5118	50.8694
LTR60	0	0.777075	0	0.654628	0.495091	0	0	0	0	0	0	0
LTR60B	1.34548	1.62571	1.09296	1.81191	2.34301	1.02103	1.79096	2.88409	2.18983	9.7882	2.29068	2.38056
LTR61	2.45954	4.78644	2.26924	4.49835	6.20726	3.58402	4.52067	3.77255	6.4532	7.95277	4.65829	4.91019
LTR62	1.878	3.47842	1.83455	4.88648	5.54389	4.48003	3.4513	4.80143	6.96961	11.3556	4.39255	4.04353
LTR64	1.94394	5.57539	2.48912	3.75758	4.1949	1.7295	2.69053	3.82904	5.34115	10.2399	4.90479	4.17441
LTR65	1.73987	3.59314	1.34724	4.74941	4.0233	3.72988	2.14963	5.0135	6.03859	11.0962	5.48524	5.04754
LTR66	1.2207	1.0106	1.07049	1.44812	2.27054	2.68802	2.63862	2.75308	3.4621	6.77125	2.68847	2.54395
LTR67B	17.6785	27.9724	17.1002	24.7901	29.6327	21.1224	23.376	27.6222	29.8786	79.2117	28.9046	28.2399
LTR68	1.24405	4.038	2.24467	2.62303	3.43028	1.10438	1.50108	2.97397	2.25851	9.68855	2.47985	2.3675
LTR69	0.505001	0.628666	0	0.609638	0.536972	1.14605	0.703798	0.844156	1.14912	2.72061	0.855142	0.779703
LTR6A	4.26241	9.2194	4.20525	9.52304	15.2826	19.5875	34.7218	24.8261	27.7771	33.8692	29.796	28.4295
LTR6B	0.907013	1.64816	0.878795	1.63705	2.18698	2.39796	1.77543	2.14821	4.48478	4.33202	2.00941	1.69417
LTR7	4.24664	4.05049	2.48379	6.08756	6.09752	6.35455	7.08429	6.4011	19.0625	28.146	8.4236	7.08587
LTR70	11.2537	12.6376	7.13393	8.97384	7.51667	4.31333	3.43337	3.42326	3.22893	12.6139	4.04735	2.98192
LTR71A	1.20993	3.50835	1.5035	3.09379	3.43565	0.896005	1.80402	2.10929	2.37338	5.40768	1.84323	2.12963
LTR71B	1.29347	2.06544	1.2062	3.03656	5.81905	7.6473	3.66969	4.00807	5.59936	7.85021	5.21474	4.1115
LTR72	1.37648	3.0061	1.79652	3.52413	4.42787	5.77194	5.39845	5.87714	8.33299	7.72871	8.18652	7.23883
LTR72B	0.455603	0.824911	0.633484	2.34952	4.3272	1.35443	1.62624	2.07253	1.58961	5.58143	2.53098	2.29833
LTR73	0.799411	1.94603	0.606167	2.19103	2.20786	1.70824	2.17139	2.64586	3.76284	5.94808	3.1302	3.14373
LTR75	2.53723	5.81012	2.73029	6.51385	7.83548	5.60524	4.87066	4.52609	3.56811	10.9871	5.03775	4.97087
LTR75B	1.03434	3.59673	1.53056	1.81962	3.25532	2.22959	2.09548	1.93252	1.21897	7.40481	1.47688	1.948
LTR75_1	0.439007	1.71776	1.47849	1.41551	1.94819	1.60447	1.68994	2.26975	2.72187	5.37535	2.5051	2.14813
LTR76	13.1705	23.4197	15.8618	14.6385	15.0956	13.3567	11.8251	12.6019	18.3019	20.9333	14.9316	12.7936
LTR77	1.88409	2.57832	2.922	1.98875	3.16288	1.7295	2.5282	2.0104	1.54738	5.23724	2.27731	1.97022
LTR78	11.7376	19.1123	9.56079	17.056	22.4249	18.6907	18.3528	33.1753	29.8035	118.24	30.0249	27.9959
LTR78B	5.52344	8.99266	3.89334	9.3206	9.21275	8.4387	9.21826	17.0246	16.243	70.1716	15.9663	13.9904
LTR79	15.358	27.9036	15.8065	22.2089	28.5835	21.1357	27.0169	30.6712	32.062	94.8718	35.1306	30.4161
LTR7B	5.64695	11.4415	5.50913	14.3449	18.6836	19.8692	14.836	12.8794	29.1153	22.766	15.3075	12.5525
LTR7C	2.66163	3.67827	1.63134	5.12031	4.67562	5.45938	5.71063	6.75862	12.395	12.9079	8.63415	8.08308
LTR7Y	0	0.609968	0	0.477349	0.740283	0.760563	2.18871	1.16538	3.0019	3.29727	1.71468	1.31597
LTR8	20.189	25.0144	14.7457	28.5953	33.0532	34.0369	27.4769	38.6174	53.3562	122.382	41.4162	36.0392
LTR80A	0.887306	0.708899	0.444729	1.05337	1.17849	0.93768	0.674968	1.89904	1.14941	6.08495	1.44843	1.10906
LTR80B	1.01328	1.21032	0.525779	1.83169	2.10578	1.68699	1.93371	3.54737	1.85702	8.33834	3.81476	2.97496
LTR81	0	2.01595	1.01124	0.790727	1.13689	0.729307	1.07507	1.29937	0.962215	6.4685	1.08817	1.46408
LTR81A	2.43028	3.80563	2.57626	2.86355	3.19043	2.60467	2.86968	4.25484	2.84491	17.0381	4.2432	3.17973
LTR81AB	0.424958	0	0	0.764364	0.611368	0	0	0.892962	0.446706	3.53625	0.431136	0.593733
LTR81B	9.43533	10.3967	9.99745	11.8296	15.7131	10.3978	13.7548	12.9992	20.487	33.0861	10.3891	10.3764
LTR81C	1.09414	1.83751	1.11387	1.77302	1.8283	1.43778	1.94824	3.33255	3.02215	17.9998	2.43509	2.45764
LTR82A	3.29869	4.97118	2.71205	3.94207	5.23076	3.43816	4.65257	6.72747	5.33279	28.2096	9.1502	7.24104
LTR82B	6.81749	4.30992	3.22485	4.48435	5.65407	4.48003	4.1584	9.28194	9.33782	25.326	8.49567	7.50764
LTR83	2.9514	2.81886	2.29373	2.82689	3.59021	2.74011	3.03814	4.86601	4.01668	14.457	4.98208	5.07288
LTR84a	4.30837	8.17128	4.43841	4.58075	6.48014	2.97974	4.21892	5.93598	5.19289	13.5788	6.07346	5.71204
LTR84b	3.45562	7.31553	3.58169	5.70702	6.63192	5.93864	6.7178	9.2182	8.01752	24.8034	8.83518	8.28277
LTR85a	4.20954	7.3562	4.55831	4.73645	5.64998	4.56338	5.19024	10.3141	8.94236	27.5156	9.39031	8.45811
LTR85b	1.62502	4.13622	1.88873	4.38002	4.27104	4.06328	4.24786	6.35167	6.14342	18.3583	5.806	5.42739
LTR85c	2.94148	4.18258	2.12644	3.43726	3.2106	2.60467	4.47564	5.34313	7.47204	21.4409	5.70906	4.73267
LTR86A1	2.37366	3.59678	1.53951	4.08947	3.72369	2.81304	2.49079	4.44766	3.44305	12.6878	4.55788	4.12345
LTR86A2	1.01631	1.43433	0.527041	2.21237	2.36572	1.88203	1.1985	2.82744	3.12695	7.3064	2.95118	2.23186
LTR86B1	1.11537	1.04111	0.437462	1.69191	1.21621	2.81304	1.31828	2.20005	2.36111	7.91614	2.51781	2.23169
LTR86B2	0.485959	0.950672	0.546905	0.911491	1.11197	0.854331	0.620862	1.72927	1.94661	4.31215	1.50217	1.53598
LTR86C	0.533746	1.99318	0.957557	1.71378	1.87432	1.31275	1.47733	2.24368	1.13001	7.25089	1.90681	1.56392
LTR87	6.52238	13.0993	5.64179	12.4347	10.4627	8.78877	6.67612	11.4221	9.66605	24.0134	12.8582	11.7471
LTR88a	3.08059	4.59902	2.523	4.22858	4.12495	2.64634	4.23787	5.82433	3.45976	24.8176	5.70793	5.64856
LTR88b	2.98348	5.38128	2.44478	3.82004	4.70764	4.31333	3.46092	8.1607	5.52556	33.2584	6.26093	5.4923
LTR88c	1.35311	2.66191	1.31577	1.53437	2.4641	2.10457	2.51977	3.63646	2.64708	12.1947	3.23555	2.98679
LTR89	3.38005	6.11697	3.53232	5.72822	6.86414	4.14663	4.56799	6.89044	5.01124	23.309	6.13704	5.51608
LTR89B	1.6551	3.39736	2.31429	3.01916	3.92172	2.71927	2.95316	4.62806	3.45326	10.9379	3.80166	3.39172
LTR8A	12.2264	19.8457	8.97246	15.0572	14.9827	14.1065	14.5781	21.3192	20.863	47.6717	20.5488	21.9032
LTR8B	14.7339	17.6526	15.0194	26.7069	20.1489	14.8983	15.627	27.4387	19.7129	65.3124	25.0006	26.6947
LTR9	1.62469	3.29134	1.8605	3.85976	4.94121	4.93845	3.34481	5.435	6.31729	26.0149	4.94248	4.22323
LTR90A	1.27267	2.53731	1.32198	2.40896	2.13587	1.3961	1.22308	2.31641	1.32527	7.82682	2.37749	1.59728
LTR90B	1.09335	1.31114	0.887064	0.899034	1.3072	1.3961	0.671743	1.92371	1.7633	4.93432	1.54814	1.33998
LTR91	2.58307	2.9239	1.85326	2.36227	3.33825	2.27127	2.46594	5.8628	4.48173	26.5083	4.5706	4.37286
LTR91A	4.00512	8.46144	4.23966	9.67035	11.3562	6.81381	8.51085	13.7673	9.91675	37.0647	10.0129	9.86186
LTR9A1	1.52368	3.34706	1.55539	3.34648	4.18316	3.81323	4.35162	5.63096	5.11215	18.5374	5.34684	5.23787
LTR9B	2.29057	3.0754	1.64611	4.69763	4.15534	5.16766	4.48848	5.31198	9.73785	20.0043	5.48754	3.97276
LTR9C	0	0	0	0.481977	0	0.562608	0	0.461117	0.51045	0.941245	0.402968	0.4311
LTR9D	6.78888	9.46855	5.62414	8.42668	8.59219	4.98012	5.91903	8.96183	9.28892	26.6033	9.13837	8.41218
Looper	2.48488	4.1557	2.16575	4.52171	4.7254	2.56341	2.96589	6.2368	11.6369	8.94063	5.13633	3.59669
MADE1	6.13361	11.8505	7.95054	8.8777	10.2933	7.52144	6.30737	12.9428	10.6631	32.237	11.863	10.3868
MADE2	3.33855	5.52057	3.13661	5.85771	6.44341	4.06328	5.02869	8.62635	5.30723	20.9721	8.04795	6.81967
MARE10	0	0.569892	0	0	0.448127	0.479259	0	0.571173	1.50049	1.26452	0.710409	0.468837
MARE4	1.00671	1.43279	1.06094	1.30241	1.689	0.604283	0.615009	1.70126	1.01785	2.46789	1.40398	1.01359
MARE6	0.580396	1.01976	0.459679	0.962562	1.00737	0.770981	0.987756	1.31124	1.23914	5.2682	1.69987	0.969593
MARE8	0	0.732349	0	0.532005	0.753571	0.423415	0.728144	0.898809	1.22608	3.56609	0.979667	0.988889
MARNA	19.7424	29.953	20.3541	26.1857	32.0934	18.5523	22.1858	29.3375	26.3128	60.7479	30.6618	26.3189
MER101	3.17901	5.82169	3.65501	5.25651	6.10007	3.18811	3.16911	3.70787	2.30743	9.79958	3.17529	3.23338
MER101-int	20.6048	39.9295	27.1856	18.7938	29.1944	14.3794	18.6316	32.0967	18.5789	44.6359	24.9475	28.9017
MER101B	0.693436	0.792033	0	0.757836	0.952356	0.604283	0.571401	0.929314	0.416364	5.5733	0.985102	0.772328
MER102a	9.63747	17.4096	7.55423	18.7303	20.3617	15.017	15.4464	24.8562	21.6902	50.5307	22.8652	21.5558
MER102b	14.5766	21.4572	10.2935	23.5431	21.6125	20.8161	21.5091	29.7089	30.3859	69.1199	32.5027	29.4317
MER102c	15.0154	17.3021	8.99948	17.7878	17.5425	17.0629	14.3722	23.3575	25.1663	59.8621	23.4017	19.9749
MER103C	48.787	55.2945	35.6467	48.3835	58.9245	43.5571	48.242	68.8347	68.7147	150.753	68.7653	58.0174
MER104	15.2487	14.8906	10.651	10.7013	12.0781	10.7796	8.78707	16.1223	11.9791	29.2624	17.8933	13.7927
MER105	3.74331	5.1375	2.4598	4.90074	5.29232	3.81323	3.10395	5.73585	5.38816	11.3579	6.77696	6.41022
MER106A	1.56695	3.20427	1.38645	3.41696	3.22338	2.93806	2.6777	4.25635	4.76577	7.25581	4.49718	3.5028
MER106B	4.43615	6.92167	3.73516	4.83486	6.73693	3.27104	5.56796	5.5389	8.78245	9.11598	7.05945	5.3404
MER107	1.06288	2.2464	0.935932	3.09703	3.45321	2.22959	1.98134	2.84806	2.72256	4.68929	2.46992	2.41286
MER110	1.48923	1.94997	0.931189	1.91204	2.69973	1.18773	2.70536	3.36314	4.52135	13.3794	3.36123	2.79072
MER110-int	1.57095	2.31028	1.14979	2.35008	1.87037	1.85411	2.2418	4.58511	3.22767	10.1726	3.67058	3.59019
MER110A	1.31064	2.31862	1.34812	2.28227	2.50268	2.22959	3.69374	5.17362	5.14394	14.6258	4.5023	4.00061
MER112	21.0519	29.938	17.8651	26.1557	30.8659	20.0243	25.577	32.9071	32.6457	69.0559	37.347	30.5035
MER113	9.83071	18.5816	7.08461	16.2578	19.375	16.9195	15.3102	28.2437	27.8228	62.2953	31.1953	27.2244
MER113A	5.49796	14.6015	6.84584	9.64631	10.5627	5.58441	7.71984	11.7488	11.3265	25.2048	11.4806	11.0332
MER115	9.23791	16.7758	6.92378	13.8326	12.4969	12.9817	13.3105	22.4219	15.9533	74.0667	18.3898	19.2152
MER117	11.2517	20.5826	8.29961	20.9212	20.7364	19.1637	14.4046	25.531	25.6432	66.1722	25.7808	25.7611
MER119	5.71543	8.49015	4.17799	8.41162	8.47061	8.43912	5.23821	9.78642	8.75769	25.7203	9.70705	7.4663
MER11A	9.20266	27.4842	14.4635	22.4955	29.0245	18.3985	18.6227	27.3155	30.4632	71.4068	28.8774	24.9381
MER11B	9.10444	12.9444	7.97007	10.6126	14.2451	10.4224	11.9693	18.921	24.2083	46.1864	19.036	17.5314
MER11C	18.4769	36.4226	20.2145	28.7422	39.7596	31.0997	34.1372	35.8052	43.4941	82.5042	41.5184	38.6394
MER11D	7.14967	10.9031	7.98529	8.17043	9.62861	5.66192	8.1884	9.64589	8.47805	20.4204	10.527	9.95415
MER121	1.36552	3.59048	2.23739	1.91205	1.90573	2.14625	2.04132	3.24033	3.46059	13.6079	2.76096	2.21835
MER121B	0	0	0	0	0	0	0	0	0	0	0	0
MER123	0	0	0	0	0	0	0	0	0	0	0	0
MER124	0.87641	2.05436	1.54437	2.27537	3.8239	2.35462	1.78555	3.65916	3.22843	11.5896	3.13189	3.00196
MER125	0	0	0	0	0	0	0	0	0	1.78088	0	0
MER126	0.462365	0.556932	0	0.739603	0.670622	0.833493	0	0.978678	1.46398	3.31604	0.906393	0.727723
MER127	0.473786	0.449278	0	0.877676	1.32698	0	0.442095	0.650611	2.83678	5.18902	0.75354	0.566517
MER129	0	0.434202	0	0.468351	0.522073	0.645957	0.428138	1.01125	0.579087	1.96639	0.715044	0.765705
MER130	0	0	0	0.468335	0	0.520933	0	0.589222	0.607091	5.96339	0.874582	0.888471
MER131	4.33259	12.3186	8.36699	7.72947	16.0701	8.73876	11.2584	12.7439	9.38229	14.8736	10.3653	8.56742
MER132	0	0	0	0	0	0	0	0	0	0	0	0
MER133A	0	0	0	0.494059	0.741891	0	0	0.643814	0	0.791434	0.405549	0.432767
MER133B	0	0	0	0	0	0	0	0	0.461426	0.537612	0	0
MER134	0.469748	0	0	0	0	0	0	0	0	1.06066	0.457097	0
MER135	0.912255	1.47675	0.859266	1.80893	1.81472	1.5628	1.17916	2.28078	2.47292	6.99357	2.9489	2.47447
MER136	0	0	0	0	0	0	0	0	0	0	0	0
MER1A	28.2024	48.3079	23.0418	46.3438	46.5878	40.6007	38.0249	46.5588	56.954	125.1	50.7402	46.4745
MER1B	37.9679	72.7639	29.0536	76.6318	67.5058	84.412	44.5592	75.3986	68.8933	181.873	72.1404	71.4177
MER2	46.5119	85.3073	49.2841	71.4873	88.9377	42.3931	56.0019	72.0416	77.1198	148.77	74.9189	61.024
MER20	87.1599	140.823	64.5066	134.382	123.333	129.707	102.629	160.576	137.438	397.924	156.23	144.29
MER20B	12.08	22.8038	11.0468	22.6049	20.4915	16.9895	17.9314	28.2216	28.4531	76.1222	27.2816	24.8214
MER21-int	6.21111	8.08623	4.44709	8.55714	7.38477	7.10511	5.29971	11.4733	12.383	42.2502	11.2213	8.67152
MER21A	15.2074	24.7918	9.90042	25.5321	25.7667	25.5757	18.3918	30.1935	34.1171	73.4629	33.6881	31.8285
MER21B	23.838	42.963	21.6669	38.6736	41.1924	46.0755	30.9143	47.6075	47.5659	124.695	49.4327	41.5661
[truncated: 475 more rows]

## Sheet: cpm_Mediodorsal_nucleus_of_th
TE.subfam	mean.2A	mean.2B	mean.3A	mean.3B	mean.4	mean.5	mean.6	mean.7	mean.8	mean.9	mean.10	mean.11
[truncated: 1,172 more rows]

[truncated: 9 more sheets: cpm_Orbital_prefrontal_cortex, cpm_Posterior_inferior_pariet, cpm_Primary_auditory_(A1)_cor, cpm_Primary_motor_(M1)_cortex, cpm_Primary_somatosensory_(S1, cpm_Primary_visual_(V1)_corte, cpm_Striatum.xls, cpm_Superior_temporal_cortex., cpm_Ventrolateral_prefrontal_]
