# Supplementary material for: Transposable elements and their KZFP controllers are drivers of transcriptional innovation in the developing human brain
Source: HighWire-hosted journal article supplement (doi:10.1101/gr.275133.120), 2021-08-16
Supplement: Supplemental_Table_S6.xlsx [file Supplemental_Table_S6.xlsx]

## Sheet: Legend
Supplemental Table S6 – Unique TE integrant differential expression analysis between adult (stage 11) and early prenatal (stages 2A to 3B) from both Brainspan (BS) and Cardoso (CM) datasets for DFC and CB. As CM data was stranded, differential expression was calculated for reads mapped in each orientation. TE distance to nearest gene is also shown.

## Sheet: DFC_DE_A_vs_EP_TE
TE_ID	chr	start	end	repName	strand	class.fam	unMerged.repName	mean.A.BS	mean.EP.BS	mean.both.BS	foldChange.BS	padj.BS	diffExpr.BS	dist2gene.BS	gene.ens.BS	gene.name.BS	TE.Position	mean.A.CD	mean.EP.CD	mean.both.CD	foldChange.CD	padj.CD	diffExpr.CD	mean.A.oppS	mean.EP.oppS	mean.both.CD.oppS	foldChange.oppS	padj.oppS	diffExpr.oppS
chr1:1000925-1001874:LTR13A	chr1	1000925	1001874	LTR13A	-	LTR/ERVK	LTR13A	6.95814	2.57603	4.76709	2.7011	0.14929	No	4473	ENSG00000237330	RNF223	afterGene	19.6436	22.7416	21.1926	-1.15771	0.581941	No	125.364	12.9476	69.156	9.68241	5.12602e-09	Yes
chr1:100157200-100157454:MamTip2	chr1	100157200	100157454	MamTip2	+	DNA/hAT-Tip100	MamTip2	1.38981	9.95628	5.67305	-7.16378	0.00152014	Yes	0	ENSG00000099260	PALMD	Intronic	3.57571	10.9631	7.26943	-3.066	0.0271755	Yes	0.536704	0.667876	0.60229	-1.2444	0.102343	No
chr1:100618319-100618582:AluSz6	chr1	100618319	100618582	AluSz6	-	SINE/Alu	AluSz6	2.82426	3.7378	3.28103	-1.32346	0.670709	No	0	ENSG00000122477	LRRC39	Intronic	0.662854	0.729517	0.696186	-1.10057	0.59303	No	6.1807	19.1009	12.6408	-3.0904	0.00188723	Yes
chr1:100618859-100619234:L1P4	chr1	100618859	100619234	L1P4	+	LINE/L1	L1P4	2.68484	3.41218	3.04851	-1.27091	0.717496	No	0	ENSG00000122477	LRRC39	Intronic	17.4663	42.901	30.1836	-2.45622	0.0019456	Yes	0.915492	0.792389	0.853941	1.15536	0.654536	No
chr1:100723889-100726679:L1PA4	chr1	100723889	100726679	L1PA4	-	LINE/L1	L1PA4	22.413	10.6174	16.5152	2.11097	0.124765	No	-5085	ENSG00000137996	RTCA	Intergenic	92.5889	70.3099	81.4494	1.31687	0.133213	No	0.83541	0.712631	0.77402	1.17229	0.525473	No
chr1:100729324-100730419:MER11A	chr1	100729324	100730419	MER11A	+	LTR/ERVK	MER11A	18.7458	6.26174	12.5037	2.9937	0.00977084	Yes	-1345	ENSG00000137996	RTCA	Intergenic	0.56036	0.694906	0.627633	-1.24011	0.121117	No	34.305	15.7478	25.0264	2.1784	0.0115825	Yes
chr1:101002592-101003125:L1MC1	chr1	101002592	101003125	L1MC1	-	LINE/L1	L1MC1	39.1076	4.78639	21.947	8.17058	0.00156221	Yes	-569	ENSG00000181656	GPR88	Intergenic	146.757	13.5785	80.1677	10.808	3.57032e-11	Yes	0.704419	0.726637	0.715528	-1.03154	0.878174	No
chr1:10225090-10226000:L2a	chr1	10225090	10226000	L2a	+	LINE/L2	L2a	5.79266	1.45128	3.62197	3.99141	0.0526166	No	0	ENSG00000130939	UBE4B	Intronic	11.3123	10.4745	10.8934	1.07999	0.860517	No	0.536704	0.667712	0.602208	-1.2441	0.102343	No
chr1:102264527-102264679:Charlie4z	chr1	102264527	102264679	Charlie4z	-	DNA/hAT-Charlie	Charlie4z	12.694	2.24871	7.47134	5.64499	0.00785845	Yes	3452	ENSG00000118733	OLFM3	afterGene	32.3915	2.25538	17.3234	14.3619	8.70688e-08	Yes	0.536704	0.640414	0.588559	-1.19324	0.102343	No
chr1:102264834-102265088:L2a	chr1	102264834	102265088	L2a	+	LINE/L2	L2a	37.1213	8.39269	22.757	4.42305	0.0113138	Yes	3043	ENSG00000118733	OLFM3	afterGene	0.595653	0.689199	0.642426	-1.15705	0.327454	No	72.8496	4.47523	38.6624	16.2784	1.5331e-07	Yes
chr1:102266463-102266589:MLT1A0	chr1	102266463	102266589	MLT1A0	-	LTR/ERVL-MaLR	MLT1A0	23.746	5.14293	14.4445	4.6172	0.00358875	Yes	1542	ENSG00000118733	OLFM3	afterGene	24.472	2.8649	13.6684	8.54201	6.59206e-06	Yes	0.536704	0.640414	0.588559	-1.19324	0.102343	No
chr1:1030080-1031580:L1MD3	chr1	1030080	1031580	L1MD3	-	LINE/L1	L1MD3	19.4068	7.715	13.5609	2.51546	0.102436	No	0	ENSG00000131591	C1orf159	Intronic	33.4303	37.5915	35.5109	-1.12447	0.663142	No	1.63491	0.921016	1.27796	1.77511	0.102343	No
chr1:10334994-10335307:L1MC5a	chr1	10334994	10335307	L1MC5a	+	LINE/L1	L1MC5a	4.95102	19.1984	12.0747	-3.87766	0.00188185	Yes	0	ENSG00000054523	KIF1B	Intronic	13.5504	30.1212	21.8358	-2.22289	0.0128243	Yes	0.536704	0.95282	0.744762	-1.77532	0.00692622	No
chr1:103511177-103517306:L1PA4	chr1	103511177	103517306	L1PA4	-	LINE/L1	L1PA4	0.855104	0.922668	0.888886	-1.07901	0.909595	No	0	ENSG00000060718	COL11A1	Intronic	0.832836	2.7555	1.79417	-3.30857	0.00163691	Yes	1.04089	0.691358	0.866125	1.50558	0.159378	No
chr1:10372254-10372991:L2b	chr1	10372254	10372991	L2b	+	LINE/L2	L2b	1.91458	1.35997	1.63727	1.40782	0.689847	No	0	ENSG00000054523	KIF1B	Intronic	3.13049	3.84086	3.48567	-1.22692	0.664099	No	0.544896	0.640414	0.592655	-1.1753	0.135017	No
chr1:10422256-10422566:AluJb	chr1	10422256	10422566	AluJb	+	SINE/Alu	AluJb	1.42122	0.650014	1.03562	2.18645	0.0630637	No	0	ENSG00000054523	KIF1B	Intronic	3.45811	4.11089	3.7845	-1.18877	0.694747	No	0.536704	0.73615	0.636427	-1.37161	0.0804047	No
chr1:10422577-10422648:L1ME3E	chr1	10422577	10422648	L1ME3E	-	LINE/L1	L1ME3E	0.572464	0.465108	0.518786	1.23082	0.288057	No	0	ENSG00000054523	KIF1B	Intronic	0.536393	0.640152	0.588272	-1.19344	0.0952777	No	0.740276	1.62002	1.18015	-2.18839	0.102343	No
chr1:10442947-10443802:L2a	chr1	10442947	10443802	L2a	-	LINE/L2	L2a	46.7078	14.9852	30.8465	3.11693	0.116662	No	1287	ENSG00000054523	KIF1B	afterGene	0.569526	0.756131	0.662828	-1.32765	0.0991376	No	41.3144	26.128	33.7212	1.58123	0.216762	No
chr1:10443803-10444081:AluJo	chr1	10443803	10444081	AluJo	+	SINE/Alu	AluJo	9.39576	4.40935	6.90255	2.13087	0.244028	No	2143	ENSG00000054523	KIF1B	afterGene	9.08446	6.63765	7.86106	1.36863	0.404845	No	0.544896	0.693028	0.618962	-1.27185	0.102343	No
chr1:10444349-10444748:L2a	chr1	10444349	10444748	L2a	-	LINE/L2	L2a	26.1417	9.89852	18.0201	2.64097	0.183413	No	2689	ENSG00000054523	KIF1B	afterGene	0.62599	0.68073	0.65336	-1.08745	0.574308	No	25.0749	13.1124	19.0937	1.9123	0.0975534	No
chr1:10444782-10444903:LTR79	chr1	10444782	10444903	LTR79	-	LTR/ERVL	LTR79	5.83004	2.13804	3.98404	2.72682	0.0954259	No	3122	ENSG00000054523	KIF1B	afterGene	0.536393	0.640152	0.588272	-1.19344	0.0952777	No	2.75129	2.47124	2.61127	1.11333	0.817784	No
chr1:10445260-10445422:MER5A1	chr1	10445260	10445422	MER5A1	-	DNA/hAT-Charlie	MER5A1	13.3055	4.21981	8.76264	3.15309	0.096056	No	3600	ENSG00000054523	KIF1B	afterGene	0.640754	0.641892	0.641323	-1.00178	0.994064	No	7.55507	5.34247	6.44877	1.41415	0.357019	No
chr1:10445599-10445935:L2a	chr1	10445599	10445935	L2a	-	LINE/L2	L2a	22.1872	9.28165	15.7344	2.39044	0.131821	No	3939	ENSG00000054523	KIF1B	afterGene	0.598853	0.757232	0.678042	-1.26447	0.170208	No	22.5669	16.8216	19.6942	1.34154	0.303574	No
chr1:10446601-10446905:AluY	chr1	10446601	10446905	AluY	-	SINE/Alu	AluY	9.21182	3.22399	6.21791	2.85727	0.101494	No	4941	ENSG00000054523	KIF1B	afterGene	0.640754	0.696161	0.668458	-1.08647	0.638694	No	8.72215	7.54223	8.13219	1.15644	0.669737	No
chr1:10447097-10447218:FLAM_C	chr1	10447097	10447218	FLAM_C	+	SINE/Alu	FLAM_C	4.06753	2.42763	3.24758	1.67551	0.465455	No	5437	ENSG00000054523	KIF1B	Intergenic	5.37417	4.937	5.15558	1.08855	0.816911	No	0.536704	0.679822	0.608263	-1.26666	0.102343	No
chr1:10447219-10447515:AluJr	chr1	10447219	10447515	AluJr	+	SINE/Alu	AluJr	3.68261	2.90945	3.29603	1.26574	0.756827	No	5559	ENSG00000054523	KIF1B	Intergenic	4.21246	5.4034	4.80793	-1.28272	0.500421	No	0.59139	0.670152	0.630771	-1.13318	0.350335	No
chr1:10447516-10447639:AluJb	chr1	10447516	10447639	AluJb	+	SINE/Alu	AluJb	6.00719	2.39088	4.19904	2.51254	0.132716	No	5856	ENSG00000054523	KIF1B	Intergenic	5.09712	6.76445	5.93079	-1.32711	0.432373	No	0.544896	0.642394	0.593645	-1.17893	0.131915	No
chr1:10448712-10448819:MIRc	chr1	10448712	10448819	MIRc	-	SINE/MIR	MIRc	5.8939	3.22793	4.56092	1.82591	0.381851	No	7052	ENSG00000054523	KIF1B	Intergenic	0.536393	0.642131	0.589262	-1.19713	0.0952777	No	12.724	13.654	13.189	-1.07309	0.823321	No
chr1:10448905-10449083:AluSz6	chr1	10448905	10449083	AluSz6	-	SINE/Alu	AluSz6	6.87355	4.29055	5.58205	1.60202	0.570373	No	7245	ENSG00000054523	KIF1B	Intergenic	0.536393	0.640152	0.588272	-1.19344	0.0952777	No	9.77226	12.1927	10.9825	-1.24769	0.47246	No
chr1:10449091-10449362:AluSq	chr1	10449091	10449362	AluSq	-	SINE/Alu	AluSq	7.22368	2.78105	5.00236	2.59746	0.183413	No	7431	ENSG00000054523	KIF1B	Intergenic	0.536393	0.640152	0.588272	-1.19344	0.0952777	No	4.40906	4.02237	4.21571	1.09613	0.813843	No
chr1:10449615-10449771:L1M4a1	chr1	10449615	10449771	L1M4a1	+	LINE/L1	L1M4a1	6.0507	4.06163	5.05617	1.48972	0.590152	No	7955	ENSG00000054523	KIF1B	Intergenic	14.7705	11.0275	12.899	1.33942	0.332106	No	0.594113	0.640414	0.617264	-1.07793	0.54143	No
chr1:10450561-10450862:AluY	chr1	10450561	10450862	AluY	-	SINE/Alu	AluY	4.71642	2.83683	3.77663	1.66257	0.548532	No	-7788	ENSG00000142657	PGD	Intergenic	0.536393	0.640152	0.588272	-1.19344	0.0952777	No	4.94837	8.48652	6.71744	-1.71501	0.125556	No
chr1:10450946-10451130:L1M4a1	chr1	10450946	10451130	L1M4a1	+	LINE/L1	L1M4a1	11.6051	6.85634	9.23074	1.69262	0.430605	No	-7520	ENSG00000142657	PGD	Intergenic	22.1998	19.9933	21.0966	1.11036	0.704121	No	0.560789	0.640414	0.600602	-1.14199	0.236742	No
chr1:10451759-10451941:L1M4a1	chr1	10451759	10451941	L1M4a1	+	LINE/L1	L1M4a1	3.70824	5.7812	4.74472	-1.55902	0.540309	No	-6709	ENSG00000142657	PGD	Intergenic	18.92	16.7813	17.8506	1.12745	0.703053	No	0.536704	0.666222	0.601463	-1.24132	0.102343	No
chr1:10451944-10452253:AluJr	chr1	10451944	10452253	AluJr	+	SINE/Alu	AluJr	11.0086	4.71468	7.86162	2.33495	0.226232	No	-6397	ENSG00000142657	PGD	Intergenic	13.7399	18.3396	16.0398	-1.33477	0.301994	No	0.557284	0.656303	0.606793	-1.17768	0.161437	No
chr1:10452261-10452566:AluSz	chr1	10452261	10452566	AluSz	+	SINE/Alu	AluSz	9.22777	5.58859	7.40818	1.65118	0.409641	No	-6084	ENSG00000142657	PGD	Intergenic	11.5858	17.3429	14.4644	-1.49692	0.170731	No	0.536704	0.6436	0.590152	-1.19917	0.102343	No
chr1:10452695-10452959:AluJr4	chr1	10452695	10452959	AluJr4	+	SINE/Alu	AluJr4	10.0848	5.07245	7.57863	1.98815	0.34433	No	-5691	ENSG00000142657	PGD	Intergenic	9.74786	14.4408	12.0943	-1.48144	0.146049	No	0.544896	0.640414	0.592655	-1.1753	0.135017	No
chr1:10453731-10454079:L1M4a1	chr1	10453731	10454079	L1M4a1	+	LINE/L1	L1M4a1	10.2214	5.30521	7.76332	1.92668	0.312936	No	-4571	ENSG00000142657	PGD	Intergenic	18.1721	20.6241	19.3981	-1.13493	0.670137	No	0.560789	0.666373	0.613581	-1.18828	0.170528	No
chr1:10454080-10454383:AluSx	chr1	10454080	10454383	AluSx	+	SINE/Alu	AluSx	14.069	5.15261	9.61081	2.73046	0.130908	No	-4267	ENSG00000142657	PGD	Intergenic	9.22089	13.9161	11.5685	-1.50919	0.15389	No	0.659731	0.644613	0.652172	1.02345	0.888082	No
chr1:10454384-10454855:L1M4a1	chr1	10454384	10454855	L1M4a1	+	LINE/L1	L1M4a1	22.736	9.37161	16.0538	2.42605	0.146674	No	-3795	ENSG00000142657	PGD	Intergenic	34.5242	40.6143	37.5693	-1.1764	0.508132	No	0.619599	0.66995	0.644775	-1.08126	0.598884	No
chr1:10454867-10455125:AluSz	chr1	10454867	10455125	AluSz	+	SINE/Alu	AluSz	4.92876	4.73416	4.83146	1.04111	0.960888	No	-3525	ENSG00000142657	PGD	Intergenic	13.1541	30.253	21.7035	-2.29988	0.00372864	Yes	0.601365	0.663635	0.6325	-1.10355	0.457926	No
chr1:10455675-10455995:AluJb	chr1	10455675	10455995	AluJb	-	SINE/Alu	AluJb	18.9826	7.84732	13.4149	2.41899	0.199307	No	-2655	ENSG00000142657	PGD	Intergenic	0.536393	0.641892	0.589142	-1.19668	0.0952777	No	34.8853	48.5917	41.7385	-1.3929	0.154079	No
chr1:10456048-10456320:AluSx	chr1	10456048	10456320	AluSx	+	SINE/Alu	AluSx	12.5563	9.59769	11.077	1.30826	0.71118	No	-2330	ENSG00000142657	PGD	Intergenic	30.1482	46.4848	38.3165	-1.54187	0.0952777	No	0.553941	0.644613	0.599277	-1.16368	0.172912	No
chr1:10456715-10457009:AluSx3	chr1	10456715	10457009	AluSx3	+	SINE/Alu	AluSx3	9.57034	8.84271	9.20653	1.08229	0.920771	No	-1641	ENSG00000142657	PGD	Intergenic	16.4398	30.7008	23.5703	-1.86747	0.0299339	No	0.59837	0.694781	0.646575	-1.16112	0.309	No
chr1:10457010-10457485:L1ME1	chr1	10457010	10457485	L1ME1	+	LINE/L1	L1ME1	39.0403	17.8945	28.4674	2.1817	0.208432	No	-1165	ENSG00000142657	PGD	Intergenic	143.059	125.154	134.106	1.14306	0.547841	No	2.42459	1.26171	1.84315	1.92167	0.135017	No
chr1:1047424-1047780:MER50	chr1	1047424	1047780	MER50	+	LTR/ERV1	MER50	5.34418	2.33235	3.83826	2.29133	0.298923	No	0	ENSG00000131591	C1orf159	Intronic	0.592002	0.640152	0.616077	-1.08133	0.519903	No	14.4603	10.3426	12.4015	1.39813	0.25103	No
chr1:10480333-10480427:L1ME3D	chr1	10480333	10480427	L1ME3D	+	LINE/L1	L1ME3D	38.9617	249.368	144.165	-6.40033	1.38503e-06	Yes	133	ENSG00000142657	PGD	afterGene	95.1227	266.452	180.787	-2.80114	2.78055e-09	Yes	0.583239	0.716308	0.649773	-1.22816	0.181662	No
chr1:107966563-107967657:L2a	chr1	107966563	107967657	L2a	-	LINE/L2	L2a	0.897277	0.508342	0.70281	1.7651	0.0766826	No	0	ENSG00000162631	NTNG1	Intronic	0.536393	0.640152	0.588272	-1.19344	0.0952777	No	1.48947	0.932407	1.21094	1.59744	0.227133	No
chr1:108019525-108020154:LTR50	chr1	108019525	108020154	LTR50	-	LTR/ERVL	LTR50	1.62993	0.719436	1.17468	2.26557	0.112518	No	0	ENSG00000162631	NTNG1	Intronic	0.536393	0.701118	0.618755	-1.3071	0.0952777	No	6.34087	5.6241	5.98248	1.12745	0.819977	No
chr1:108026620-108027146:MER115	chr1	108026620	108027146	MER115	+	DNA/hAT-Tip100	MER115	6.0984	0.577798	3.3381	10.5545	1.49421e-05	Yes	541	ENSG00000162631	NTNG1	afterGene	15.1581	3.04643	9.10226	4.9757	0.00146461	Yes	0.71706	0.661707	0.689384	1.08365	0.63851	No
chr1:108738339-108738639:AluSz6	chr1	108738339	108738639	AluSz6	+	SINE/Alu	AluSz6	6.48154	18.111	12.2963	-2.79424	0.0100547	Yes	0	ENSG00000085491	SLC25A24	Intronic	0.536393	0.643335	0.589864	-1.19937	0.0952777	No	9.74327	31.2404	20.4918	-3.20636	2.2047e-05	Yes
chr1:108739005-108739137:MIRc	chr1	108739005	108739137	MIRc	-	SINE/MIR	MIRc	1.96425	10.6547	6.30945	-5.42429	0.000435402	Yes	0	ENSG00000085491	SLC25A24	Intronic	3.31779	11.3178	7.31781	-3.41126	0.000214569	Yes	0.536704	0.640414	0.588559	-1.19324	0.102343	No
chr1:108739176-108739427:MLT1A0	chr1	108739176	108739427	MLT1A0	-	LTR/ERVL-MaLR	MLT1A0	4.08207	14.7873	9.43467	-3.62249	0.00522307	Yes	0	ENSG00000085491	SLC25A24	Intronic	7.23499	20.7309	13.9829	-2.86536	0.000449858	Yes	0.583146	0.640414	0.61178	-1.0982	0.433051	No
chr1:108740417-108740865:MSTB2	chr1	108740417	108740865	MSTB2	+	LTR/ERVL-MaLR	MSTB2	4.28627	16.4308	10.3585	-3.83335	0.00798733	Yes	0	ENSG00000085491	SLC25A24	Intronic	0.536393	0.691398	0.613895	-1.28898	0.0952777	No	3.63879	14.2433	8.94106	-3.91431	0.002004	Yes
chr1:109159332-109161100:L2a	chr1	109159332	109161100	L2a	-	LINE/L2	L2a	4.06861	1.972	3.02031	2.06319	0.293816	No	0	ENSG00000162636	FAM102B	Intronic	0.544596	0.714185	0.629391	-1.3114	0.0952777	No	4.08784	3.34792	3.71788	1.22101	0.698655	No
chr1:109208488-109208940:MLT2D	chr1	109208488	109208940	MLT2D	-	LTR/ERVL	MLT2D	0.743224	0.82106	0.782142	-1.10473	0.847469	No	-4341	ENSG00000162639	HENMT1	Intergenic	0.536393	0.670026	0.603209	-1.24913	0.0952777	No	1.43156	1.60247	1.51701	-1.11939	0.818939	No
chr1:109468994-109470317:L1M3	chr1	109468994	109470317	L1M3	+	LINE/L1	L1M3	51.589	35.5548	43.5719	1.45097	0.232695	No	0	ENSG00000162641	AKNAD1	Intronic	2.00492	4.20882	3.10687	-2.09925	0.0952777	No	86.0509	109.207	97.629	-1.2691	0.240291	No
chr1:109470318-109470604:AluJr	chr1	109470318	109470604	AluJr	+	SINE/Alu	AluJr	14.5935	15.2319	14.9127	-1.04374	0.931483	No	0	ENSG00000162641	AKNAD1	Intronic	0.619396	0.827764	0.72358	-1.3364	0.167831	No	19.724	31.6063	25.6652	-1.60243	0.0940143	No
chr1:109470605-109470890:L1M3	chr1	109470605	109470890	L1M3	+	LINE/L1	L1M3	15.4614	13.1709	14.3161	1.17391	0.701482	No	0	ENSG00000162641	AKNAD1	Intronic	1.20934	1.62725	1.4183	-1.34557	0.464306	No	65.0556	74.5281	69.7918	-1.14561	0.521335	No
chr1:109470893-109471116:L2a	chr1	109470893	109471116	L2a	-	LINE/L2	L2a	23.9691	21.5125	22.7408	1.11419	0.793768	No	0	ENSG00000162641	AKNAD1	Intronic	72.1479	77.9157	75.0318	-1.07994	0.695444	No	1.40594	2.59673	2.00134	-1.84697	0.113603	No
chr1:109478107-109478397:AluJr	chr1	109478107	109478397	AluJr	+	SINE/Alu	AluJr	5.12596	5.50771	5.31684	-1.07447	0.918477	No	0	ENSG00000162641	AKNAD1	Intronic	3.31295	7.32982	5.32138	-2.21248	0.0952777	No	0.829837	0.941121	0.885479	-1.1341	0.712867	No
chr1:109478398-109478664:L2a	chr1	109478398	109478664	L2a	-	LINE/L2	L2a	7.99798	7.92099	7.95948	1.00972	0.987482	No	0	ENSG00000162641	AKNAD1	Intronic	1.15399	1.04691	1.10045	1.10228	0.805386	No	5.98474	12.0026	8.99367	-2.00554	0.0652379	No
chr1:109480524-109480720:Charlie1	chr1	109480524	109480720	Charlie1	+	DNA/hAT-Charlie	Charlie1	10.2064	8.2223	9.21436	1.24131	0.634957	No	0	ENSG00000162641	AKNAD1	Intronic	16.5888	18.0372	17.313	-1.08731	0.787593	No	0.536704	0.722046	0.629375	-1.34533	0.080584	No
chr1:109514383-109515116:L2a	chr1	109514383	109515116	L2a	+	LINE/L2	L2a	4.19292	10.4778	7.33536	-2.49893	0.0575203	No	0	ENSG00000085433	WDR47	Intronic	0.605348	1.0142	0.809774	-1.6754	0.0451947	No	16.8599	45.9405	31.4002	-2.72484	0.000259236	Yes
chr1:109606075-109606363:AluSz6	chr1	109606075	109606363	AluSz6	-	SINE/Alu	AluSz6	193.829	77.5904	135.71	2.49811	0.000594178	Yes	0	ENSG00000197780	TAF13	Intronic	162.778	82.3852	122.582	1.97582	0.000266647	No	0.658168	0.642736	0.650452	1.02401	0.875672	No
chr1:109758317-109758625:AluSz	chr1	109758317	109758625	AluSz	-	SINE/Alu	AluSz	37.6237	30.9339	34.2788	1.21626	0.563042	No	0	ENSG00000031698	SARS	Intronic	0.536393	0.640152	0.588272	-1.19344	0.0952777	No	35.3847	40.0142	37.6995	-1.13083	0.609715	No
chr1:109759250-109759542:AluJb	chr1	109759250	109759542	AluJb	-	SINE/Alu	AluJb	65.5931	49.1085	57.3508	1.33568	0.296584	No	0	ENSG00000031698	SARS	Intronic	0.553583	0.640152	0.596867	-1.15638	0.179605	No	89.0827	68.7379	78.9103	1.29598	0.15448	No
chr1:109759558-109759706:L2	chr1	109759558	109759706	L2	+	LINE/L2	L2	35.024	23.6689	29.3465	1.47975	0.269204	No	0	ENSG00000031698	SARS	Intronic	94.8977	61.4906	78.1941	1.54329	0.0390716	No	0.544896	0.640414	0.592655	-1.1753	0.135017	No
chr1:109759783-109760009:Tigger5b	chr1	109759783	109760009	Tigger5b	-	DNA/TcMar-Tigger	Tigger5b	44.9728	32.3647	38.6688	1.38956	0.286072	No	0	ENSG00000031698	SARS	Intronic	0.689909	0.640152	0.665031	1.07773	0.617983	No	84.6101	56.4338	70.522	1.49928	0.102343	No
chr1:110137269-110137557:AluY	chr1	110137269	110137557	AluY	-	SINE/Alu	AluY	6.34696	42.9151	24.631	-6.76151	3.17443e-06	Yes	295	ENSG00000065135	GNAI3	afterGene	0.592002	0.656127	0.624065	-1.10832	0.419405	No	21.5099	41.2378	31.3739	-1.91715	0.00620678	No
chr1:110563598-110563887:AluSx1	chr1	110563598	110563887	AluSx1	+	SINE/Alu	AluSx1	3.92592	2.72832	3.32712	1.43895	0.716288	No	0	ENSG00000168710	AHCYL1	Intronic	24.1132	51.3679	37.7406	-2.13028	0.0168493	Yes	0.559337	0.642736	0.601036	-1.1491	0.212358	No
chr1:110563952-110564085:MER5B	chr1	110563952	110564085	MER5B	-	DNA/hAT-Charlie	MER5B	1.97652	1.58645	1.78149	1.24588	0.778854	No	0	ENSG00000168710	AHCYL1	Intronic	0.548921	0.656277	0.602599	-1.19558	0.115295	No	15.6109	29.9691	22.79	-1.91975	0.0475828	No
chr1:11081643-11081973:AluJr	chr1	11081643	11081973	AluJr	-	SINE/Alu	AluJr	15.968	17.9459	16.9569	-1.12387	0.821977	No	0	ENSG00000120948	TARDBP	Intronic	0.536393	0.640152	0.588272	-1.19344	0.0952777	No	28.959	45.4134	37.1862	-1.56819	0.102343	No
chr1:11087999-11088284:AluSq	chr1	11087999	11088284	AluSq	+	SINE/Alu	AluSq	15.2364	18.7827	17.0095	-1.23275	0.694597	No	0	ENSG00000009724	MASP2	Intronic	18.4396	24.5356	21.4876	-1.3306	0.352837	No	0.544896	0.640414	0.592655	-1.1753	0.135017	No
chr1:11089041-11089356:AluY	chr1	11089041	11089356	AluY	-	SINE/Alu	AluY	9.38613	6.89878	8.14246	1.36055	0.623853	No	0	ENSG00000009724	MASP2	Intronic	0.544596	0.640152	0.592374	-1.17546	0.127035	No	27.4971	33.079	30.2881	-1.203	0.521877	No
chr1:11089385-11089474:AluSc	chr1	11089385	11089474	AluSc	+	SINE/Alu	AluSc	5.962	3.76114	4.86157	1.58516	0.443379	No	0	ENSG00000009724	MASP2	Intronic	17.4858	18.17	17.8279	-1.03913	0.915992	No	0.553941	0.640414	0.597177	-1.15611	0.188605	No
chr1:111139057-111139344:Tigger10	chr1	111139057	111139344	Tigger10	+	DNA/TcMar-Tigger	Tigger10	246.175	8.34297	127.259	29.5069	8.18562e-10	Yes	0	ENSG00000177301	KCNA2	Intronic	0.640754	0.642131	0.641442	-1.00215	0.992314	No	187.89	19.0029	103.446	9.88742	1.20488e-10	Yes
chr1:111140694-111140988:MamSINE1	chr1	111140694	111140988	MamSINE1	+	SINE/tRNA-RTE	MamSINE1	234.23	8.60247	121.416	27.2283	8.8827e-09	Yes	0	ENSG00000177301	KCNA2	Intronic	0.600961	0.643335	0.622148	-1.07051	0.58406	No	89.5318	9.58316	49.5575	9.34262	8.48047e-07	Yes
chr1:111141852-111142120:Tigger19b	chr1	111141852	111142120	Tigger19b	-	DNA/TcMar-Tigger	Tigger19b	176.24	4.35127	90.2954	40.5031	1.59435e-08	Yes	0	ENSG00000177301	KCNA2	Intronic	60.9842	6.69928	33.8417	9.1031	7.39916e-05	Yes	0.536704	0.64212	0.589412	-1.19642	0.102343	No
chr1:111143687-111143868:X12_DNA	chr1	111143687	111143868	X12_DNA	+	DNA/TcMar-Tigger	X12_DNA	101.825	3.72156	52.7731	27.3607	3.06536e-07	Yes	0	ENSG00000177301	KCNA2	Intronic	0.536393	0.640152	0.588272	-1.19344	0.0952777	No	36.8125	3.89256	20.3525	9.45714	3.15074e-05	Yes
chr1:111199663-111199968:AluSg	chr1	111199663	111199968	AluSg	-	SINE/Alu	AluSg	15.5668	17.041	16.3039	-1.0947	0.860182	No	14343	ENSG00000177272	KCNA3	Intergenic	8.6703	9.89802	9.28416	-1.1416	0.754538	No	0.536704	0.640414	0.588559	-1.19324	0.102343	No
chr1:111200006-111200131:MIR3	chr1	111200006	111200131	MIR3	-	SINE/MIR	MIR3	13.0769	11.8765	12.4767	1.10107	0.836668	No	14180	ENSG00000177272	KCNA3	Intergenic	4.25594	8.52565	6.39079	-2.00324	0.0952777	No	0.536704	0.640414	0.588559	-1.19324	0.102343	No
chr1:111488547-111489144:L1MB7	chr1	111488547	111489144	L1MB7	+	LINE/L1	L1MB7	4.34339	7.98114	6.16226	-1.83754	0.226844	No	664	ENSG00000121931	LRIF1	afterGene	0.631143	0.640152	0.635647	-1.01427	0.921918	No	10.3127	10.0678	10.1902	1.02433	0.949978	No
chr1:111489274-111489578:AluSx1	chr1	111489274	111489578	AluSx1	-	SINE/Alu	AluSx1	5.56348	8.41835	6.99091	-1.51315	0.369472	No	230	ENSG00000121931	LRIF1	afterGene	5.94321	7.59507	6.76914	-1.27794	0.455751	No	0.536704	0.695408	0.616056	-1.2957	0.108605	No
chr1:111647936-111649791:L1MA4	chr1	111647936	111649791	L1MA4	-	LINE/L1	L1MA4	3.09312	7.82039	5.45676	-2.52832	0.0921615	No	10165	ENSG00000156171	DRAM2	Intergenic	11.7686	19.8782	15.8234	-1.6891	0.0952777	No	0.892448	0.69137	0.791909	1.29084	0.203532	No
chr1:111650045-111653642:L1MA4	chr1	111650045	111653642	L1MA4	-	LINE/L1	L1MA4	3.87883	12.6281	8.25349	-3.25566	0.0401496	Yes	6314	ENSG00000156171	DRAM2	Intergenic	9.33324	17.2972	13.3152	-1.85329	0.0952777	No	0.6075	0.642394	0.624947	-1.05744	0.671829	No
chr1:111976418-111978305:ERVL-E-int	chr1	111976418	111978305	ERVL-E-int|ERVL-E-int|ERVL-E-int	+	LTR/ERVL	ERVL-E-int	15.1406	14.6488	14.8947	1.03358	0.95261	No	4208	ENSG00000116455	WDR77	afterGene	0.536393	0.642131	0.589262	-1.19713	0.0952777	No	20.4294	22.1126	21.271	-1.08239	0.841205	No
chr1:112005591-112005838:MLT2F	chr1	112005591	112005838	MLT2F	-	LTR/ERVL	MLT2F	41.3584	20.6444	31.0014	2.00337	0.0384674	Yes	197	ENSG00000116459	ATP5F1	afterGene	0.536393	0.665388	0.60089	-1.24049	0.0952777	No	36.4794	12.8665	24.6729	2.83522	0.0227849	Yes
chr1:112005962-112006096:MLT2F	chr1	112005962	112006096	MLT2F	-	LTR/ERVL	MLT2F	33.3118	12.5078	22.9098	2.66327	0.00764006	Yes	568	ENSG00000116459	ATP5F1	afterGene	0.544596	0.640152	0.592374	-1.17546	0.127035	No	20.9924	7.48587	14.2391	2.80427	0.0350356	Yes
chr1:112007181-112007505:L2c	chr1	112007181	112007505	L2c	-	LINE/L2	L2c	35.2786	16.3617	25.8202	2.15617	0.0695754	No	1787	ENSG00000116459	ATP5F1	afterGene	0.869344	0.685546	0.777445	1.2681	0.231741	No	47.8543	15.1331	31.4937	3.16224	0.000242338	Yes
chr1:112007563-112007703:MER58C	chr1	112007563	112007703	MER58C	-	DNA/hAT-Charlie	MER58C	13.3191	5.75435	9.53671	2.31461	0.0751375	No	2169	ENSG00000116459	ATP5F1	afterGene	0.536393	0.640152	0.588272	-1.19344	0.0952777	No	13.0218	3.75507	8.38843	3.46779	0.00186885	Yes
chr1:112007707-112008165:L2c	chr1	112007707	112008165	L2c	-	LINE/L2	L2c	97.8938	39.2176	68.5557	2.49617	0.00547908	Yes	2313	ENSG00000116459	ATP5F1	afterGene	1.06277	1.02068	1.04173	1.04124	0.914177	No	183.002	45.2484	114.125	4.0444	8.47793e-09	Yes
chr1:112008227-112008409:L1MEd	chr1	112008227	112008409	L1MEd	-	LINE/L1	L1MEd	19.0246	6.22615	12.6254	3.0556	0.00860161	Yes	2833	ENSG00000116459	ATP5F1	afterGene	0.536393	0.660135	0.598264	-1.23069	0.0952777	No	63.7089	15.2038	39.4563	4.19034	4.36274e-07	Yes
chr1:112008410-112008717:MER58B	chr1	112008410	112008717	MER58B	+	DNA/hAT-Charlie	MER58B	16.938	7.62078	12.2794	2.22261	0.0439503	Yes	3016	ENSG00000116459	ATP5F1	afterGene	95.6298	26.3682	60.999	3.6267	2.89258e-07	Yes	0.536704	0.660366	0.598535	-1.23041	0.102343	No
chr1:112008718-112009496:L1MEd	chr1	112008718	112009496	L1MEd	-	LINE/L1	L1MEd	20.5235	4.708	12.6157	4.35927	0.0165129	Yes	3324	ENSG00000116459	ATP5F1	afterGene	0.536393	0.640152	0.588272	-1.19344	0.0952777	No	71.2675	31.4576	51.3626	2.26551	0.00505261	Yes
chr1:112013573-112014022:L2b	chr1	112013573	112014022	L2b	+	LINE/L2	L2b	4.42689	0.723825	2.57536	6.11597	0.000977196	Yes	-2393	ENSG00000143110	C1orf162	Intergenic	5.73794	2.6146	4.17627	2.19458	0.0952777	No	0.536704	0.640414	0.588559	-1.19324	0.102343	No
chr1:112222731-112223216:LTR12B	chr1	112222731	112223216	LTR12B	-	LTR/ERV1	LTR12B	15.6779	0.898424	8.28814	17.4504	6.09572e-06	Yes	0	ENSG00000116473	RAP1A	Intronic	43.8286	1.77484	22.8017	24.6945	3.44451e-11	Yes	0.860159	0.80854	0.83435	1.06384	0.817344	No
chr1:112259443-112260484:L2a	chr1	112259443	112260484	L2a	-	LINE/L2	L2a	64.4548	1.71062	33.0827	37.6793	1.18734e-07	Yes	0	ENSG00000197852	FAM212B	Intronic	82.4122	4.73611	43.5742	17.4008	5.27292e-11	Yes	0.644839	0.76503	0.704935	-1.18639	0.52054	No
chr1:112387197-112388238:L2c	chr1	112387197	112388238	L2c	+	LINE/L2	L2c	1.5298	0.506127	1.01796	3.02256	0.00574447	Yes	0	ENSG00000171385	KCND3	Intronic	0.544596	0.640152	0.592374	-1.17546	0.127035	No	1.76873	1.73438	1.75156	1.0198	0.971867	No
chr1:112408873-112409186:AluJb	chr1	112408873	112409186	AluJb	-	SINE/Alu	AluJb	0.891859	0.463691	0.677775	1.92339	0.0196642	No	0	ENSG00000171385	KCND3	Intronic	2.8876	0.91489	1.90124	3.15623	0.024639	Yes	0.544896	0.640414	0.592655	-1.1753	0.135017	No
chr1:112481850-112483254:L1PA7	chr1	112481850	112483254	L1PA7	-	LINE/L1	L1PA7	1.06932	0.463831	0.766573	2.3054	0.015734	Yes	0	ENSG00000171385	KCND3	Intronic	8.84779	1.0236	4.9357	8.6438	9.19153e-05	Yes	0.659731	0.68956	0.674646	-1.04521	0.809574	No
chr1:112514155-112514647:L2d2	chr1	112514155	112514647	L2d2	+	LINE/L2	L2d2	3.09992	0.913722	2.00682	3.39263	0.0232322	Yes	0	ENSG00000171385	KCND3	Intronic	0.536393	0.643335	0.589864	-1.19937	0.0952777	No	4.38248	3.13106	3.75677	1.39968	0.414979	No
chr1:112536874-112537223:MSTB	chr1	112536874	112537223	MSTB	+	LTR/ERVL-MaLR	MSTB	4.62918	0.803107	2.71614	5.76409	0.00586877	Yes	-5098	ENSG00000171385	KCND3	Intergenic	9.42977	3.70712	6.56845	2.54369	0.0391022	Yes	0.549355	0.713883	0.631619	-1.29949	0.102343	No
chr1:112538250-112538721:L2c	chr1	112538250	112538721	L2c	+	LINE/L2	L2c	8.50351	0.965585	4.73455	8.80658	0.00085134	Yes	-6474	ENSG00000171385	KCND3	Intergenic	26.2269	5.97313	16.1	4.39082	0.00014069	Yes	0.560789	0.642394	0.601592	-1.14552	0.225301	No
chr1:11310423-11311672:L2a	chr1	11310423	11311672	L2a	+	LINE/L2	L2a	4.33455	0.793453	2.564	5.4629	0.00249511	Yes	0	ENSG00000198793	MTOR	Intronic	0.582982	0.640152	0.611567	-1.09806	0.428896	No	2.53095	2.25764	2.39429	1.12106	0.806815	No
chr1:11358007-11358310:AluSp	chr1	11358007	11358310	AluSp	-	SINE/Alu	AluSp	3.76445	5.10594	4.4352	-1.35636	0.579216	No	1902	ENSG00000120942	UBIAD1	afterGene	0.536393	0.640152	0.588272	-1.19344	0.0952777	No	6.14326	21.0854	13.6143	-3.43228	2.10898e-05	Yes
chr1:113582080-113583784:Tigger2	chr1	113582080	113583784	Tigger2	+	DNA/TcMar-Tigger	Tigger2	5.12617	1.99948	3.56282	2.56376	0.182888	No	-32048	ENSG00000198799	LRIG2	Intergenic	13.0222	28.4984	20.7603	-2.18844	0.0130231	Yes	0.792833	0.830129	0.811481	-1.04704	0.857756	No
chr1:114232162-114232651:MER1A	chr1	114232162	114232651	MER1A	-	DNA/hAT-Charlie	MER1A	24.6019	10.7688	17.6853	2.28456	0.0943578	No	3618	ENSG00000081026	MAGI3	afterGene	2.8081	4.68579	3.74694	-1.66867	0.14209	No	27.2127	15.0205	21.1166	1.81171	0.059949	No
chr1:114232970-114233715:Tigger2	chr1	114232970	114233715	Tigger2	+	DNA/TcMar-Tigger	Tigger2	29.4937	14.9571	22.2254	1.97188	0.0640007	No	4426	ENSG00000081026	MAGI3	afterGene	39.2374	22.8744	31.0559	1.71534	0.0477759	No	15.4042	19.7918	17.598	-1.28483	0.412644	No
chr1:114233759-114235508:Tigger2	chr1	114233759	114235508	Tigger2	+	DNA/TcMar-Tigger	Tigger2	113.708	50.6954	82.2018	2.24297	0.0059937	Yes	3946	ENSG00000116793	PHTF1	afterGene	312.083	113.676	212.879	2.74539	7.23465e-08	Yes	25.3153	53.4822	39.3987	-2.11264	0.00448019	Yes
chr1:114236305-114237826:L1MEc	chr1	114236305	114237826	L1MEc	+	LINE/L1	L1MEc	3.53766	4.63154	4.0846	-1.30921	0.692702	No	1628	ENSG00000116793	PHTF1	afterGene	1.61304	1.80561	1.70932	-1.11938	0.804666	No	7.81818	15.8615	11.8398	-2.02879	0.0581156	No
chr1:114244347-114245081:L1MEg	chr1	114244347	114245081	L1MEg	+	LINE/L1	L1MEg	1.27769	1.9029	1.5903	-1.48933	0.597791	No	0	ENSG00000116793	PHTF1	Intronic	0.61252	0.90369	0.758105	-1.47536	0.100758	No	9.56255	25.4773	17.5199	-2.66427	0.00694384	Yes
chr1:114260188-114261610:THE1A-int	chr1	114260188	114261610	THE1A|THE1A-int	-	LTR/ERVL-MaLR	THE1A-int	18.0652	10.073	14.0691	1.79342	0.227581	No	0	ENSG00000116793	PHTF1	Intronic	43.2961	47.9692	45.6326	-1.10793	0.74766	No	0.560789	0.758845	0.659817	-1.35317	0.102343	No
chr1:114261925-114262769:THE1A-int	chr1	114261925	114262769	THE1A-int|THE1A	-	LTR/ERVL-MaLR	THE1A-int	9.95744	3.30658	6.63201	3.0114	0.0732609	No	0	ENSG00000116793	PHTF1	Intronic	18.9325	31.9028	25.4176	-1.68508	0.0952777	No	0.673471	0.694009	0.68374	-1.0305	0.87712	No
chr1:114289786-114290597:HAL1	chr1	114289786	114290597	HAL1	-	LINE/L1	HAL1	23.4022	19.7799	21.5911	1.18313	0.65075	No	0	ENSG00000116793	PHTF1	Intronic	31.1155	30.2589	30.6872	1.02831	0.918068	No	0.560789	0.705147	0.632968	-1.25742	0.144421	No
chr1:114290598-114290896:AluJr	chr1	114290598	114290896	AluJr	-	SINE/Alu	AluJr	10.0211	6.09442	8.05775	1.64431	0.328444	No	0	ENSG00000116793	PHTF1	Intronic	5.4405	5.10284	5.27167	1.06617	0.860154	No	0.544896	0.640414	0.592655	-1.1753	0.135017	No
chr1:114609178-114614602:HERVL-int	chr1	114609178	114614602	HERVL-int|MLT2A1|MLT2A1	-	LTR/ERVL	HERVL-int	1.65541	1.41426	1.53483	1.17051	0.835968	No	17312	ENSG00000134207	SYT6	Intergenic	0.908968	2.43668	1.67282	-2.68071	0.00826655	Yes	0.536704	0.640414	0.588559	-1.19324	0.102343	No
chr1:114671177-114672133:L2a	chr1	114671177	114672133	L2a	+	LINE/L2	L2a	1.27031	3.35904	2.31468	-2.64426	0.125841	No	0	ENSG00000134207	SYT6	Intronic	0.536393	0.822493	0.679443	-1.53338	0.0508651	No	2.55666	12.3856	7.47111	-4.84442	5.89045e-06	Yes
chr1:114905590-114912214:Harlequin-int	chr1	114905590	114912214	LTR2|Harlequin-int|Harlequin-int|Harlequin-int|Harlequin-int|Harlequin-int|LTR2	-	LTR/ERV1	Harlequin-int	1.23191	0.884704	1.05831	1.39245	0.569792	No	23186	ENSG00000197323	TRIM33	Intergenic	4.3323	2.53203	3.43217	1.711	0.146069	No	0.549355	0.765265	0.65731	-1.39302	0.0725817	No
chr1:115107453-115108249:HAL1	chr1	115107453	115108249	HAL1	-	LINE/L1	HAL1	7.22823	28.6902	17.9592	-3.96919	0.00139342	Yes	1930	ENSG00000116752	BCAS2	afterGene	7.45534	23.7645	15.6099	-3.18759	7.03127e-05	Yes	0.61963	0.745728	0.682679	-1.20351	0.297758	No
chr1:115261654-115261889:AluJb	chr1	115261654	115261889	AluJb	+	SINE/Alu	AluJb	2.87458	1.80999	2.34228	1.58818	0.567688	No	0	ENSG00000009307	CSDE1	Intronic	0.536393	0.640152	0.588272	-1.19344	0.0952777	No	14.4753	41.3516	27.9134	-2.8567	0.000106279	Yes
chr1:115583282-115585772:L1MA4	chr1	115583282	115585772	L1MA4	+	LINE/L1	L1MA4	1.78803	10.4345	6.11126	-5.83576	0.00151803	Yes	4861	ENSG00000134198	TSPAN2	afterGene	0.536393	0.640152	0.588272	-1.19344	0.0952777	No	1.7904	18.3456	10.068	-10.2467	2.68083e-11	Yes
chr1:115589566-115590302:L1MA4	chr1	115589566	115590302	L1MA4	+	LINE/L1	L1MA4	2.57668	18.2536	10.4151	-7.08415	0.000633708	Yes	331	ENSG00000134198	TSPAN2	afterGene	0.536393	0.640152	0.588272	-1.19344	0.0952777	No	7.71471	25.7566	16.7357	-3.33863	0.000126277	Yes
chr1:1157059-1157345:AluJb	chr1	1157059	1157345	AluJb	+	SINE/Alu	AluJb	7.55591	2.99317	5.27454	2.52438	0.155886	No	0	ENSG00000078808	SDF4	Intronic	0.536393	0.640152	0.588272	-1.19344	0.0952777	No	14.4008	22.5045	18.4527	-1.56273	0.126047	No
chr1:11591837-11591967:MIRb	chr1	11591837	11591967	MIRb	-	SINE/MIR	MIRb	0.987916	1.92222	1.45507	-1.94573	0.381331	No	0	ENSG00000204624	PTCHD2	Intronic	0.536393	0.675364	0.605878	-1.25908	0.0952777	No	1.21712	19.9277	10.5724	-16.3728	5.68152e-13	Yes
chr1:11593941-11594256:L2b	chr1	11593941	11594256	L2b	-	LINE/L2	L2b	1.22815	2.55989	1.89402	-2.08435	0.379445	No	0	ENSG00000204624	PTCHD2	Intronic	0.536393	0.640152	0.588272	-1.19344	0.0952777	No	3.10291	30.4269	16.7649	-9.80592	1.44379e-10	Yes
chr1:11595888-11595990:MIR3	chr1	11595888	11595990	MIR3	+	SINE/MIR	MIR3	2.16621	4.17673	3.17147	-1.92813	0.381331	No	0	ENSG00000204624	PTCHD2	Intronic	3.14966	40.2932	21.7214	-12.7929	7.70405e-12	Yes	0.536704	0.690137	0.61342	-1.28588	0.102343	No
chr1:11603522-11603691:MIRc	chr1	11603522	11603691	MIRc	-	SINE/MIR	MIRc	0.899111	1.73951	1.31931	-1.9347	0.288057	No	5882	ENSG00000204624	PTCHD2	Intergenic	0.536393	0.640152	0.588272	-1.19344	0.0952777	No	0.69473	6.62301	3.65887	-9.53322	8.22081e-10	Yes
chr1:11603888-11604217:MLT1H	chr1	11603888	11604217	MLT1H	-	LTR/ERVL-MaLR	MLT1H	0.683505	3.91298	2.29824	-5.72487	0.00440429	Yes	6248	ENSG00000204624	PTCHD2	Intergenic	0.544596	0.640152	0.592374	-1.17546	0.127035	No	0.675547	12.4871	6.58132	-18.4844	2.40129e-13	Yes
chr1:11604259-11604595:AluSx1	chr1	11604259	11604595	AluSx1	+	SINE/Alu	AluSx1	0.571079	1.22563	0.898355	-2.14616	0.104319	No	6619	ENSG00000204624	PTCHD2	Intergenic	0.781359	4.99151	2.88643	-6.38823	3.74607e-07	Yes	0.536704	0.683077	0.60989	-1.27273	0.102343	No
chr1:11604719-11605128:MLT1B	chr1	11604719	11605128	MLT1B	+	LTR/ERVL-MaLR	MLT1B	0.684332	3.77457	2.22945	-5.5157	0.00497524	Yes	7079	ENSG00000204624	PTCHD2	Intergenic	1.13634	11.8928	6.51455	-10.4658	1.73446e-09	Yes	0.536704	0.642736	0.58972	-1.19756	0.102343	No
chr1:11605129-11605444:MLT1C	chr1	11605129	11605444	MLT1C	+	LTR/ERVL-MaLR	MLT1C	0.978161	3.5389	2.25853	-3.61792	0.0444493	Yes	7489	ENSG00000204624	PTCHD2	Intergenic	0.755219	11.2158	5.98549	-14.851	5.86331e-13	Yes	0.536704	0.6436	0.590152	-1.19917	0.102343	No
chr1:11607597-11607802:HERVIP10FH-int	chr1	11607597	11607802	HERVIP10FH-int	+	LTR/ERV1	HERVIP10FH-int	0.57238	2.53835	1.55536	-4.43473	0.004857	Yes	9957	ENSG00000204624	PTCHD2	Intergenic	0.79984	5.65067	3.22525	-7.06475	1.35236e-08	Yes	0.544896	1.04241	0.793652	-1.91304	0.0155841	No
chr1:11609205-11609689:L1ME3	chr1	11609205	11609689	L1ME3	+	LINE/L1	L1ME3	0.818425	2.98589	1.90216	-3.64833	0.050102	No	11565	ENSG00000204624	PTCHD2	Intergenic	0.823571	13.3742	7.09888	-16.2393	7.0072e-13	Yes	0.536704	0.640414	0.588559	-1.19324	0.102343	No
chr1:11611406-11611801:L2a	chr1	11611406	11611801	L2a	-	LINE/L2	L2a	0.683437	3.56311	2.12328	-5.21352	0.00555925	Yes	13766	ENSG00000204624	PTCHD2	Intergenic	0.536393	0.766458	0.651425	-1.42891	0.0792475	No	1.14038	20.7537	10.947	-18.1988	3.13625e-11	Yes
chr1:11611802-11612098:AluJr	chr1	11611802	11612098	AluJr	+	SINE/Alu	AluJr	0.68059	2.25379	1.46719	-3.31153	0.0380074	Yes	14162	ENSG00000204624	PTCHD2	Intergenic	0.940121	10.2664	5.60326	-10.9203	7.36087e-10	Yes	0.536704	0.642394	0.589549	-1.19693	0.102343	No
chr1:11612282-11612806:MLT2B4	chr1	11612282	11612806	MLT2B4	+	LTR/ERVL	MLT2B4	0.75018	6.24648	3.49833	-8.32664	0.000679305	Yes	14642	ENSG00000204624	PTCHD2	Intergenic	1.37291	19.616	10.4944	-14.2878	1.82676e-12	Yes	0.536704	0.640414	0.588559	-1.19324	0.102343	No
chr1:116241517-116241950:MSTB1	chr1	116241517	116241950	MSTB1	+	LTR/ERVL-MaLR	MSTB1	1.42118	0.464057	0.942618	3.06251	0.000635145	Yes	673	ENSG00000173218	VANGL1	afterGene	0.536393	0.640152	0.588272	-1.19344	0.0952777	No	2.60355	0.686733	1.64514	3.79121	0.00114062	Yes
chr1:116615099-116615223:L1ME3Cz	chr1	116615099	116615223	L1ME3Cz	+	LINE/L1	L1ME3Cz	7.80553	1.37117	4.58835	5.69262	0.00297496	Yes	2425	ENSG00000163393	SLC22A15	afterGene	13.0064	4.06861	8.53751	3.19677	0.0249484	Yes	0.536704	0.640414	0.588559	-1.19324	0.102343	No
chr1:116615293-116615701:L4_C_Mam	chr1	116615293	116615701	L4_C_Mam	-	LINE/RTE-X	L4_C_Mam	2.13698	1.20868	1.67283	1.76803	0.346833	No	2619	ENSG00000163393	SLC22A15	afterGene	0.536393	0.640152	0.588272	-1.19344	0.0952777	No	4.85981	1.60799	3.2339	3.02228	0.0389255	Yes
chr1:116628821-116636160:L1PB3	chr1	116628821	116636160	L1PB3	-	LINE/L1	L1PB3	1.60757	0.509437	1.0585	3.15558	0.00706723	Yes	16147	ENSG00000163393	SLC22A15	Intergenic	0.536393	0.640152	0.588272	-1.19344	0.0952777	No	1.50686	0.916365	1.21161	1.64439	0.219729	No
chr1:1166798-1166974:MIRb	chr1	1166798	1166974	MIRb	-	SINE/MIR	MIRb	2.6383	2.84741	2.74285	-1.07926	0.941029	No	0	ENSG00000078808	SDF4	Intronic	3.99682	2.28594	3.14138	1.74844	0.186983	No	0.553941	0.640414	0.597177	-1.15611	0.188605	No
chr1:11700852-11701058:MIRb	chr1	11700852	11701058	MIRb	+	SINE/MIR	MIRb	12.0695	0.631428	6.35047	19.1146	8.37502e-07	Yes	7367	ENSG00000116661	FBXO2	Intergenic	0.536393	0.640152	0.588272	-1.19344	0.0952777	No	22.3023	0.745103	11.5237	29.9319	1.70946e-11	Yes
chr1:11703622-11703800:MIRb	chr1	11703622	11703800	MIRb	+	SINE/MIR	MIRb	10.8005	0.52775	5.66413	20.4652	3.68466e-07	Yes	4625	ENSG00000116661	FBXO2	afterGene	0.536393	0.640152	0.588272	-1.19344	0.0952777	No	12.3606	0.983248	6.67194	12.5712	1.36515e-07	Yes
chr1:11720603-11720787:MIRc	chr1	11720603	11720787	MIRc	-	SINE/MIR	MIRc	9.47239	1.56641	5.5194	6.04719	0.0014642	Yes	0	ENSG00000132879	FBXO44	Intronic	0.59711	1.77243	1.18477	-2.96834	0.00505718	Yes	10.7202	3.42857	7.07438	3.12672	0.00778999	Yes
chr1:11720838-11721139:AluJo	chr1	11720838	11721139	AluJo	-	SINE/Alu	AluJo	18.4312	2.35855	10.3949	7.81464	0.000103831	Yes	0	ENSG00000132879	FBXO44	Intronic	0.675415	2.06421	1.36981	-3.05621	0.0117134	Yes	30.1082	7.4906	18.7994	4.01946	2.41359e-05	Yes
chr1:117952843-117954580:L1M5	chr1	117952843	117954580	L1M5	+	LINE/L1	L1M5	0.685608	0.507883	0.596745	1.34993	0.28984	No	0	ENSG00000198162	MAN1A2	Intronic	2.36839	2.1005	2.23445	1.12754	0.81117	No	0.536704	0.640414	0.588559	-1.19324	0.102343	No
chr1:117964679-117966287:L1MD3	chr1	117964679	117966287	L1MD3	-	LINE/L1	L1MD3	11.3377	10.7484	11.0431	1.05482	0.921352	No	0	ENSG00000198162	MAN1A2	Intronic	0.536393	0.642131	0.589262	-1.19713	0.0952777	No	30.4559	30.1968	30.3263	1.00858	0.983452	No
chr1:118061178-118064014:L1PB1	chr1	118061178	118064014	L1PB1	+	LINE/L1	L1PB1	18.0648	2.73953	10.4022	6.59414	0.00737569	Yes	0	ENSG00000198162	MAN1A2	Intronic	42.3775	19.7062	31.0419	2.15047	0.0952777	No	0.568809	0.67549	0.62215	-1.18755	0.188843	No
chr1:118383554-118384038:L2	chr1	118383554	118384038	L2	+	LINE/L2	L2	7.0892	7.59337	7.34128	-1.07112	0.925761	No	22070	ENSG00000196505	GDAP2	Intergenic	0.536393	0.64246	0.589426	-1.19774	0.0952777	No	18.8623	9.11446	13.9884	2.06949	0.0437876	Yes
chr1:118384577-118388033:L1PA13	chr1	118384577	118388033	L1PA13	+	LINE/L1	L1PA13	36.2006	32.3688	34.2847	1.11838	0.840232	No	18075	ENSG00000196505	GDAP2	Intergenic	0.536393	0.640152	0.588272	-1.19344	0.0952777	No	34.0518	20.4068	27.2293	1.66865	0.195854	No
chr1:118402064-118403207:Tigger1	chr1	118402064	118403207	Tigger1	+	DNA/TcMar-Tigger	Tigger1	6.88311	14.56	10.7216	-2.11533	0.0765463	No	2901	ENSG00000196505	GDAP2	afterGene	0.536393	0.640152	0.588272	-1.19344	0.0952777	No	8.34376	17.7446	13.0442	-2.12669	0.01241	Yes
chr1:119693574-119694800:L1PA4	chr1	119693574	119694800	L1PA4	-	LINE/L1	L1PA4	4.92253	4.71774	4.82014	1.04341	0.949476	No	-10281	ENSG00000116874	WARS2	Intergenic	0.536393	0.656127	0.59626	-1.22322	0.0952777	No	24.981	28.529	26.755	-1.14203	0.731586	No
chr1:119695134-119700040:L1PA4	chr1	119695134	119700040	L1PA4	-	LINE/L1	L1PA4	8.95934	6.03089	7.49512	1.48557	0.501992	No	-11841	ENSG00000116874	WARS2	Intergenic	0.641602	0.824072	0.732837	-1.2844	0.216297	No	27.5831	59.7051	43.6441	-2.16456	0.0401151	Yes
chr1:119713987-119723014:HERV9NC-int	chr1	119713987	119723014	LTR12C|HERV9NC-int|LTR12C	+	LTR/ERV1	HERV9NC-int	9.68754	7.66324	8.67539	1.26416	0.702001	No	-30694	ENSG00000116874	WARS2	Intergenic	11.384	41.7229	26.5534	-3.66505	0.000178812	Yes	1.03656	0.708636	0.872598	1.46275	0.135017	No
chr1:119965887-119974529:PRIMA4-int	chr1	119965887	119974529	PRIMA4_LTR|PRIMA4-int|PRIMA4-int|PRIMA4_LTR	-	LTR/ERV1	PRIMA4-int	1.71096	0.554388	1.13268	3.08622	0.0157797	Yes	230	ENSG00000203859	HSD3B2	afterGene	12.9181	0.762112	6.84011	16.9504	3.27575e-11	Yes	0.536704	0.68269	0.609697	-1.272	0.0898804	No
chr1:120102960-120103866:L1MB8	chr1	120102960	120103866	L1MB8	+	LINE/L1	L1MB8	9.8864	1.7002	5.7933	5.81484	0.00209292	Yes	45280	ENSG00000203857	HSD3B1	Intergenic	0.536393	0.640152	0.588272	-1.19344	0.0952777	No	31.7364	4.16057	17.9485	7.62791	9.70451e-06	Yes
chr1:120116502-120119704:L1PA6	chr1	120116502	120119704	L1PA6	+	LINE/L1	L1PA6	9.48632	1.17065	5.32848	8.10347	0.00361846	Yes	42342	ENSG00000143067	ZNF697	Intergenic	0.544596	0.640152	0.592374	-1.17546	0.127035	No	5.2322	0.989069	3.11064	5.29002	0.000877391	Yes
chr1:120120010-120123000:L1PA6	chr1	120120010	120123000	L1PA6	+	LINE/L1	L1PA6	6.77307	1.06829	3.92068	6.34012	0.00579402	Yes	39046	ENSG00000143067	ZNF697	Intergenic	0.536393	0.640152	0.588272	-1.19344	0.0952777	No	6.30406	0.92896	3.61651	6.78615	3.13206e-05	Yes
chr1:120142375-120142587:L1ME2	chr1	120142375	120142587	L1ME2	+	LINE/L1	L1ME2	8.26074	4.62113	6.44094	1.7876	0.251741	No	19459	ENSG00000143067	ZNF697	Intergenic	0.536393	0.640152	0.588272	-1.19344	0.0952777	No	14.0006	12.9804	13.4905	1.0786	0.828555	No
chr1:120146326-120146525:MIRb	chr1	120146326	120146525	MIRb	+	SINE/MIR	MIRb	9.07294	6.01928	7.54611	1.50731	0.457142	No	15521	ENSG00000143067	ZNF697	Intergenic	0.536393	0.640152	0.588272	-1.19344	0.0952777	No	2.29029	3.8269	3.0586	-1.67093	0.265279	No
chr1:120148441-120149300:LTR1A2	chr1	120148441	120149300	LTR1A2	-	LTR/ERV1	LTR1A2	23.5239	10.4504	16.9872	2.251	0.129436	No	12746	ENSG00000143067	ZNF697	Intergenic	6.56231	7.94505	7.25368	-1.21071	0.697991	No	0.536704	0.64212	0.589412	-1.19642	0.102343	No
chr1:12087367-12087926:L2a	chr1	12087367	12087926	L2a	+	LINE/L2	L2a	2.22996	2.41223	2.32109	-1.08174	0.942535	No	0	ENSG00000116691	MIIP	Intronic	5.03704	31.8821	18.4596	-6.32954	2.95624e-09	Yes	0.536704	0.640414	0.588559	-1.19324	0.102343	No
chr1:120911477-120912061:L2a	chr1	120911477	120912061	L2a	+	LINE/L2	L2a	19.2785	3.90643	11.5925	4.93506	0.00920034	Yes	14919	ENSG00000198019	FCGR1B	Intergenic	44.1491	38.6378	41.3935	1.14264	0.584844	No	1.57168	1.35623	1.46396	1.15886	0.758058	No
chr1:120915578-120916198:MLT2B3	chr1	120915578	120916198	MLT2B3	+	LTR/ERVL	MLT2B3	2.53186	2.74528	2.63857	-1.08429	0.921218	No	10782	ENSG00000198019	FCGR1B	Intergenic	10.1578	23.3167	16.7373	-2.29544	0.031659	Yes	0.721993	0.862348	0.792171	-1.1944	0.593042	No
chr1:121130767-121130981:L1ME4a	chr1	121130767	121130981	L1ME4a	-	LINE/L1	L1ME4a	12.2843	10.9784	11.6314	1.11895	0.850548	No	-194831	ENSG00000198019	FCGR1B	Intergenic	0.571344	0.795406	0.683375	-1.39217	0.0952777	No	21.7571	53.4215	37.5893	-2.45536	0.0177889	Yes
chr1:121131573-121131717:L3b	chr1	121131573	121131717	L3b	+	LINE/CR1	L3b	9.68628	12.7905	11.2384	-1.32048	0.516225	No	-195637	ENSG00000198019	FCGR1B	Intergenic	4.37756	14.1471	9.26233	-3.23173	0.00144	Yes	0.636769	0.77314	0.704955	-1.21416	0.448353	No
chr1:121132620-121132931:AluSx1	chr1	121132620	121132931	AluSx1	+	SINE/Alu	AluSx1	28.0145	42.0809	35.0477	-1.50211	0.260606	No	-196684	ENSG00000198019	FCGR1B	Intergenic	23.9412	48.7959	36.3685	-2.03816	0.00587719	Yes	0.982541	0.721093	0.851817	1.36257	0.229132	No
chr1:121133103-121134090:L1MB4	chr1	121133103	121134090	L1MB4	+	LINE/L1	L1MB4	29.8861	29.1735	29.5298	1.02443	0.947434	No	-197167	ENSG00000198019	FCGR1B	Intergenic	36.5566	43.4004	39.9785	-1.18721	0.489084	No	0.910891	0.706801	0.808846	1.28875	0.369836	No
chr1:121143308-121149329:L1PA3	chr1	121143308	121149329	L1PA3	+	LINE/L1	L1PA3	6.61151	4.77515	5.69333	1.38457	0.572677	No	-207372	ENSG00000198019	FCGR1B	Intergenic	9.38369	7.06455	8.22412	1.32828	0.543274	No	0.567069	0.769223	0.668146	-1.35649	0.133363	No
chr1:121156805-121157271:LTR16C	chr1	121156805	121157271	LTR16C	+	LTR/ERVL	LTR16C	2.14773	3.07883	2.61328	-1.43353	0.646606	No	-220869	ENSG00000198019	FCGR1B	Intergenic	3.10752	5.11463	4.11107	-1.64589	0.258826	No	0.536704	0.640414	0.588559	-1.19324	0.102343	No
chr1:121157533-121157952:L2b	chr1	121157533	121157952	L2b	-	LINE/L2	L2b	2.14097	3.68877	2.91487	-1.72294	0.442909	No	-221597	ENSG00000198019	FCGR1B	Intergenic	0.548921	0.640152	0.594536	-1.1662	0.151277	No	7.65703	7.39052	7.52377	1.03606	0.950628	No
chr1:121316088-121322219:L1PA3	chr1	121316088	121322219	L1PA3	+	LINE/L1	L1PA3	13.3914	4.9582	9.17478	2.70085	0.0588911	No	-380152	ENSG00000198019	FCGR1B	Intergenic	24.8489	11.7308	18.2899	2.11826	0.0952777	No	0.594184	0.646807	0.620496	-1.08856	0.492048	No
chr1:121340005-121346117:L1PA4	chr1	121340005	121346117	L1PA4	-	LINE/L1	L1PA4	10.7171	4.60756	7.66234	2.32599	0.105174	No	-404069	ENSG00000198019	FCGR1B	Intergenic	0.544596	0.642131	0.593363	-1.1791	0.124364	No	8.24514	12.4076	10.3264	-1.50484	0.228366	No
chr1:1215081-1215372:MER4B-int	chr1	1215081	1215372	MER4B-int	-	LTR/ERV1	MER4B-int	11.2864	4.88399	8.08521	2.3109	0.293749	No	-445	ENSG00000162572	SCNN1D	Intergenic	0.770978	0.696818	0.733898	1.10643	0.619066	No	56.7955	36.3329	46.5642	1.5632	0.102343	No
chr1:1236145-1236446:AluSp	chr1	1236145	1236446	AluSp	-	SINE/Alu	AluSp	18.567	8.5842	13.5756	2.16293	0.195817	No	0	ENSG00000131584	ACAP3	Intronic	44.826	76.9383	60.8821	-1.71638	0.0315103	No	0.609828	0.642394	0.626111	-1.0534	0.708259	No
chr1:1253757-1254042:AluJb	chr1	1253757	1254042	AluJb	+	SINE/Alu	AluJb	8.88058	5.19173	7.03616	1.71052	0.361941	No	0	ENSG00000127054	CPSF3L	Intronic	3.66461	7.6728	5.6687	-2.09376	0.0621414	No	14.8467	42.8532	28.8499	-2.88638	0.000523914	Yes
chr1:1287640-1287736:LTR16B1	chr1	1287640	1287736	LTR16B1	+	LTR/ERVL	LTR16B1	17.1988	2.97011	10.0845	5.79064	0.0157848	Yes	334	ENSG00000162576	MXRA8	afterGene	47.5239	8.24301	27.8834	5.76536	1.63462e-06	Yes	0.536704	0.642736	0.58972	-1.19756	0.102343	No
chr1:1292613-1292906:MER54A	chr1	1292613	1292906	MER54A	+	LTR/ERVL	MER54A	27.5147	4.84483	16.1798	5.6792	0.00707483	Yes	0	ENSG00000162576	MXRA8	Intronic	109.875	24.6033	67.239	4.46585	2.35836e-07	Yes	0.904701	0.902278	0.903489	1.00268	0.993293	No
chr1:1292907-1293196:AluSq2	chr1	1292907	1293196	AluSq2	+	SINE/Alu	AluSq2	25.0084	3.40492	14.2066	7.34478	0.002771	Yes	0	ENSG00000162576	MXRA8	Intronic	74.1579	16.3671	45.2625	4.53092	9.21351e-07	Yes	1.03447	0.80398	0.919224	1.28668	0.320084	No
chr1:1329225-1329520:AluSx	chr1	1329225	1329520	AluSx	+	SINE/Alu	AluSx	3.80902	3.53341	3.67121	1.078	0.938947	No	0	ENSG00000221978	CCNL2	Intronic	0.536393	0.640152	0.588272	-1.19344	0.0952777	No	7.78304	27.7522	17.7676	-3.56573	0.000550322	Yes
chr1:1344143-1344396:AluSz	chr1	1344143	1344396	AluSz	-	SINE/Alu	AluSz	5.81925	5.58961	5.70443	1.04108	0.949936	No	-1451	ENSG00000242485	MRPL20	Intergenic	0.544596	0.64246	0.593528	-1.1797	0.123412	No	16.8532	20.1775	18.5153	-1.19725	0.527386	No
chr1:1347632-1352150:Harlequin-int	chr1	1347632	1352150	LTR2B|Harlequin-int|Harlequin-int	-	LTR/ERV1	Harlequin-int	22.3132	3.11842	12.7158	7.15528	0.000107502	Yes	1651	ENSG00000235098	ANKRD65	afterGene	30.3187	12.6956	21.5072	2.38813	0.0147094	Yes	1.07171	2.02481	1.54826	-1.88932	0.131915	No
chr1:1358153-1358754:MER41B	chr1	1358153	1358754	MER41B	+	LTR/ERV1	MER41B	16.2215	1.79656	9.00904	9.02919	0.000454835	Yes	-1005	ENSG00000235098	ANKRD65	Intergenic	35.662	5.52984	20.5959	6.44901	5.6233e-07	Yes	1.40733	7.55909	4.48321	-5.37124	1.43495e-05	Yes
chr1:1358859-1359151:AluSx1	chr1	1358859	1359151	AluSx1	-	SINE/Alu	AluSx1	0.570523	1.19588	0.883201	-2.09611	0.153567	No	-1711	ENSG00000235098	ANKRD65	Intergenic	2.96715	6.7836	4.87537	-2.28624	0.050731	No	0.591463	0.640414	0.615939	-1.08276	0.515104	No
chr1:1359156-1359467:AluSx	chr1	1359156	1359467	AluSx	-	SINE/Alu	AluSx	1.37481	0.938159	1.15649	1.46544	0.514858	No	-2008	ENSG00000235098	ANKRD65	Intergenic	1.63434	7.30694	4.47064	-4.47089	9.76457e-05	Yes	0.557284	0.683077	0.62018	-1.22572	0.139522	No
chr1:1359820-1360131:AluSq2	chr1	1359820	1360131	AluSq2	+	SINE/Alu	AluSq2	1.48234	1.36715	1.42475	1.08426	0.917973	No	-1378	ENSG00000205116	TMEM88B	Intergenic	0.553583	0.640152	0.596867	-1.15638	0.179605	No	1.8461	7.03196	4.43903	-3.80909	0.000338334	Yes
chr1:1360193-1360481:AluJb	chr1	1360193	1360481	AluJb	+	SINE/Alu	AluJb	1.36761	2.05162	1.70961	-1.50015	0.595525	No	-1028	ENSG00000205116	TMEM88B	Intergenic	0.536393	0.640152	0.588272	-1.19344	0.0952777	No	4.39981	16.1522	10.276	-3.67112	8.4027e-05	Yes
chr1:1364099-1364399:AluYk2	chr1	1364099	1364399	AluYk2	+	SINE/Alu	AluYk2	188.629	0.63748	94.6332	295.898	3.77244e-12	Yes	933	ENSG00000205116	TMEM88B	afterGene	120.352	1.53147	60.9416	78.586	3.61004e-14	Yes	0.810805	0.679822	0.745313	1.19267	0.369746	No
chr1:1364400-1364578:AluSq2	chr1	1364400	1364578	AluSq2	+	SINE/Alu	AluSq2	94.833	0.49943	47.6662	189.883	8.57984e-11	Yes	1234	ENSG00000205116	TMEM88B	afterGene	23.0857	0.785233	11.9355	29.3998	5.4617e-11	Yes	0.837053	0.640414	0.738734	1.30705	0.118359	No
chr1:1364582-1364740:AluSx4	chr1	1364582	1364740	AluSx4	+	SINE/Alu	AluSx4	112.901	0.572376	56.7367	197.25	1.00296e-10	Yes	1416	ENSG00000205116	TMEM88B	afterGene	103.569	1.58664	52.5777	65.2754	1.02288e-13	Yes	0.71706	0.67101	0.694035	1.06863	0.704335	No
chr1:1364747-1365048:L1MEd	chr1	1364747	1365048	L1MEd	-	LINE/L1	L1MEd	314	0.600471	157.3	522.924	4.01579e-13	Yes	1581	ENSG00000205116	TMEM88B	afterGene	1.47017	1.23445	1.35231	1.19095	0.653336	No	234.856	3.14984	119.003	74.5613	2.39355e-13	Yes
chr1:1365248-1365537:AluJb	chr1	1365248	1365537	AluJb	-	SINE/Alu	AluJb	263.928	0.660841	132.294	399.382	1.33488e-12	Yes	2082	ENSG00000205116	TMEM88B	afterGene	1.03545	1.07205	1.05375	-1.03534	0.931755	No	214.034	3.2085	108.621	66.7084	3.92104e-14	Yes
chr1:1413058-1413383:AluSp	chr1	1413058	1413383	AluSp	-	SINE/Alu	AluSp	14.4643	7.50667	10.9855	1.92685	0.389524	No	0	ENSG00000160072	ATAD3B	Intronic	0.544596	0.640152	0.592374	-1.17546	0.127035	No	32.4256	50.681	41.5533	-1.56299	0.0688738	No
chr1:143162529-143166637:L1PA13	chr1	143162529	143166637	L1PA13	-	LINE/L1	L1PA13	18.113	12.2385	15.1757	1.47999	0.580793	No	600508	ENSG00000236334	PPIAL4G	Intergenic	0.619179	0.644514	0.631846	-1.04092	0.767592	No	12.8424	32.3969	22.6196	-2.52266	0.0181062	Yes
chr1:144016770-144018639:LTR12C	chr1	144016770	144018639	LTR12C	-	LTR/ERV1	LTR12C	2.90533	1.07	1.98767	2.71525	0.127829	No	-103628	ENSG00000215784	FAM72D	Intergenic	0.544596	0.642131	0.593363	-1.1791	0.124364	No	2.22271	1.84913	2.03592	1.20203	0.731872	No
chr1:144059510-144060149:L1ME2	chr1	144059510	144060149	L1ME2	+	LINE/L1	L1ME2	0.827767	0.53106	0.679414	1.55871	0.2199	No	-86660	ENSG00000162825	NBPF8	Intergenic	1.81467	2.79064	2.30265	-1.53782	0.306952	No	0.536704	0.642736	0.58972	-1.19756	0.102343	No
chr1:144478312-144478753:LTR49	chr1	144478312	144478753	LTR49	-	LTR/ERV1	LTR49	3.5312	1.48379	2.5075	2.37985	0.197557	No	0	ENSG00000231360	AL592284.1	Intronic	13.5824	4.82219	9.20231	2.81665	0.0344482	Yes	0.536704	0.640414	0.588559	-1.19324	0.102343	No
chr1:144673274-144673784:L1PA3	chr1	144673274	144673784	L1PA3	+	LINE/L1	L1PA3	54.9117	12.0081	33.4599	4.57288	0.000358564	Yes	-137961	ENSG00000168614	NBPF9	Intergenic	3.25497	1.23542	2.2452	2.63469	0.0643266	No	109.911	29.8181	69.8648	3.68607	1.30948e-05	Yes
chr1:144673915-144674186:AluSc	chr1	144673915	144674186	AluSc	-	SINE/Alu	AluSc	27.4942	12.3302	19.9122	2.22983	0.0819712	No	-137559	ENSG00000168614	NBPF9	Intergenic	58.484	20.3803	39.4321	2.86964	0.00112953	Yes	0.699907	0.651018	0.675462	1.0751	0.676496	No
chr1:144674228-144674547:AluSx	chr1	144674228	144674547	AluSx	+	SINE/Alu	AluSx	32.7213	8.12799	20.4246	4.02576	0.00303354	Yes	-137198	ENSG00000168614	NBPF9	Intergenic	0.63228	0.705414	0.668847	-1.11567	0.60733	No	30.8747	16.8643	23.8695	1.83077	0.102227	No
chr1:144675297-144675486:L2	chr1	144675297	144675486	L2	-	LINE/L2	L2	82.2844	21.8666	52.0755	3.76302	0.000763428	Yes	-136259	ENSG00000168614	NBPF9	Intergenic	78.6351	26.4674	52.5512	2.97102	0.00396002	Yes	0.686607	0.845982	0.766295	-1.23212	0.480885	No
chr1:144675616-144675730:L2	chr1	144675616	144675730	L2	-	LINE/L2	L2	45.3889	9.65168	27.5203	4.70269	0.00592957	Yes	-136015	ENSG00000168614	NBPF9	Intergenic	30.149	15.9148	23.0319	1.8944	0.0952777	No	0.658346	0.793512	0.725929	-1.20531	0.382801	No
chr1:144675790-144676031:L2c	chr1	144675790	144676031	L2c	+	LINE/L2	L2c	42.1883	11.0685	26.6284	3.81157	0.00760186	Yes	-135714	ENSG00000168614	NBPF9	Intergenic	1.24776	1.26406	1.25591	-1.01306	0.982564	No	69.5956	33.0256	51.3106	2.10732	0.0909621	No
chr1:144676032-144676436:MLT1A0	chr1	144676032	144676436	MLT1A0	-	LTR/ERVL-MaLR	MLT1A0	105.377	26.3758	65.8764	3.99521	0.000911429	Yes	-135309	ENSG00000168614	NBPF9	Intergenic	86.4815	34.3289	60.4052	2.51921	0.0412764	Yes	1.04798	1.09256	1.07027	-1.04254	0.928912	No
chr1:144676437-144676644:L2c	chr1	144676437	144676644	L2c	+	LINE/L2	L2c	56.3437	12.4683	34.406	4.51895	0.000429373	Yes	-135101	ENSG00000168614	NBPF9	Intergenic	0.648355	0.837152	0.742754	-1.29119	0.286751	No	75.3471	22.045	48.696	3.41788	0.000509027	Yes
chr1:144833060-144833819:L1MEc	chr1	144833060	144833819	L1MEc	+	LINE/L1	L1MEc	1.01899	1.04946	1.03423	-1.02991	0.963282	No	2339	ENSG00000178104	PDE4DIP	afterGene	0.553583	0.857439	0.705511	-1.54889	0.0480655	No	32.0904	48.5192	40.3048	-1.51195	0.150958	No
chr1:144840755-144842859:L1P2	chr1	144840755	144842859	L1P2	+	LINE/L1	L1P2	2.47736	3.01678	2.74707	-1.21774	0.842849	No	0	ENSG00000178104	PDE4DIP	Intronic	0.536393	0.640152	0.588272	-1.19344	0.0952777	No	8.4535	12.7109	10.5822	-1.50363	0.37658	No
chr1:144843306-144849427:L1PA6	chr1	144843306	144849427	L1PA6	+	LINE/L1	L1PA6	8.71783	3.98719	6.35251	2.18646	0.265035	No	0	ENSG00000178104	PDE4DIP	Intronic	0.544596	0.644514	0.594555	-1.18347	0.116441	No	13.0552	16.7553	14.9053	-1.28342	0.590083	No
chr1:144852968-144853120:MIR3	chr1	144852968	144853120	MIR3	-	SINE/MIR	MIR3	9.98653	2.58693	6.28673	3.86039	0.0799218	No	0	ENSG00000178104	PDE4DIP	Intronic	54.3687	41.1261	47.7474	1.322	0.300323	No	0.536704	0.640414	0.588559	-1.19324	0.102343	No
chr1:144893785-144893923:MIRc	chr1	144893785	144893923	MIRc	-	SINE/MIR	MIRc	0.986178	1.04064	1.01341	-1.05523	0.933822	No	0	ENSG00000178104	PDE4DIP	Intronic	2.49385	9.82309	6.15847	-3.93892	0.000234193	Yes	0.536704	0.640414	0.588559	-1.19324	0.102343	No
chr1:144920825-144921114:L2c	chr1	144920825	144921114	L2c	+	LINE/L2	L2c	1.07068	1.54543	1.30806	-1.4434	0.592927	No	0	ENSG00000178104	PDE4DIP	Intronic	0.536393	0.666874	0.601633	-1.24326	0.0952777	No	2.99014	5.60603	4.29809	-1.87484	0.168595	No
chr1:144925934-144926333:L2a	chr1	144925934	144926333	L2a	-	LINE/L2	L2a	8.73499	14.5278	11.6314	-1.66318	0.241379	No	0	ENSG00000178104	PDE4DIP	Intronic	20.5747	31.4633	26.019	-1.52923	0.0952777	No	0.536704	0.640414	0.588559	-1.19324	0.102343	No
chr1:144933643-144934027:MSTA	chr1	144933643	144934027	MSTA	+	LTR/ERVL-MaLR	MSTA	3.27443	11.1747	7.22456	-3.41272	0.0313306	Yes	0	ENSG00000178104	PDE4DIP	Intronic	6.32013	16.3215	11.3208	-2.58246	0.00893908	Yes	0.814001	0.751307	0.782654	1.08345	0.795239	No
chr1:144934452-144934686:Mam_R4	chr1	144934452	144934686	Mam_R4	+	LINE/Dong-R4	Mam_R4	3.37974	9.35986	6.3698	-2.7694	0.0888621	No	0	ENSG00000178104	PDE4DIP	Intronic	8.9982	20.0852	14.5417	-2.23214	0.0165662	Yes	0.659444	0.872755	0.766099	-1.32347	0.286598	No
chr1:144935576-144935815:L1ME1	chr1	144935576	144935815	L1ME1	+	LINE/L1	L1ME1	11.1298	3.46523	7.29751	3.21184	0.0224393	Yes	0	ENSG00000178104	PDE4DIP	Intronic	0.6113	0.784032	0.697666	-1.28256	0.262479	No	29.0198	7.46807	18.2439	3.88585	0.000861045	Yes
chr1:144936436-144936623:MER5A	chr1	144936436	144936623	MER5A	-	DNA/hAT-Charlie	MER5A	9.69786	1.93373	5.8158	5.0151	0.00576294	Yes	0	ENSG00000178104	PDE4DIP	Intronic	16.9769	6.45856	11.7177	2.62859	0.0245345	Yes	0.60551	0.725683	0.665596	-1.19846	0.300125	No
chr1:144937390-144937576:L2d	chr1	144937390	144937576	L2d	-	LINE/L2	L2d	9.37779	2.34507	5.86143	3.99893	0.013295	Yes	0	ENSG00000178104	PDE4DIP	Intronic	11.233	7.00217	9.11758	1.60421	0.216558	No	0.628118	0.914253	0.771186	-1.45554	0.112574	No
chr1:144938228-144938805:MamGypLTR1a	chr1	144938228	144938805	MamGypLTR1a	+	LTR/Gypsy	MamGypLTR1a	18.181	6.43134	12.3062	2.82694	0.00846392	Yes	0	ENSG00000178104	PDE4DIP	Intronic	0.621999	0.906896	0.764448	-1.45803	0.176239	No	14.4218	6.03052	10.2262	2.39147	0.093513	No
chr1:144938872-144939096:L2a	chr1	144938872	144939096	L2a	+	LINE/L2	L2a	3.11257	1.97444	2.5435	1.57643	0.489011	No	0	ENSG00000178104	PDE4DIP	Intronic	0.563151	0.840504	0.701828	-1.4925	0.0952777	No	2.43494	2.4924	2.46367	-1.0236	0.96729	No
chr1:144939596-144939898:AluSg	chr1	144939596	144939898	AluSg	-	SINE/Alu	AluSg	10.999	2.38965	6.69434	4.60279	0.0081846	Yes	0	ENSG00000178104	PDE4DIP	Intronic	4.70154	3.65029	4.17592	1.28799	0.572632	No	0.608291	0.767493	0.687892	-1.26172	0.193245	No
chr1:144940104-144940427:L2c	chr1	144940104	144940427	L2c	+	LINE/L2	L2c	9.04298	3.47315	6.25806	2.60368	0.0591058	No	0	ENSG00000178104	PDE4DIP	Intronic	0.767756	0.92618	0.846968	-1.20635	0.573437	No	9.11997	3.34655	6.23326	2.72518	0.065253	No
chr1:144940818-144941069:L2d2	chr1	144940818	144941069	L2d2	+	LINE/L2	L2d2	5.00777	1.19785	3.10281	4.18064	0.00857136	Yes	0	ENSG00000178104	PDE4DIP	Intronic	0.567052	0.809273	0.688162	-1.42716	0.0952777	No	4.67612	2.5351	3.60561	1.84455	0.205075	No
chr1:144945008-144945118:Charlie17a	chr1	144945008	144945118	Charlie17a	+	DNA/hAT-Charlie	Charlie17a	4.43745	1.42971	2.93358	3.10374	0.0688404	No	0	ENSG00000178104	PDE4DIP	Intronic	0.553583	0.749991	0.651787	-1.3548	0.0952777	No	12.9036	8.42673	10.6651	1.53126	0.237366	No
chr1:144951051-144951358:L2c	chr1	144951051	144951358	L2c	+	LINE/L2	L2c	22.3999	11.1078	16.7539	2.01659	0.0908197	No	0	ENSG00000178104	PDE4DIP	Intronic	0.826779	0.718851	0.772815	1.15014	0.585145	No	11.5839	6.46773	9.02581	1.79103	0.16572	No
chr1:144998289-144999465:L2a	chr1	144998289	144999465	L2a	+	LINE/L2	L2a	5.70901	1.40588	3.55745	4.06081	0.0183992	Yes	0	ENSG00000178104	PDE4DIP	Intronic	1.55845	2.42686	1.99265	-1.55723	0.342059	No	6.02848	2.09735	4.06291	2.87434	0.0472038	Yes
chr1:145004877-145004999:AluJr	chr1	145004877	145004999	AluJr	+	SINE/Alu	AluJr	19.3727	10.3623	14.8675	1.86954	0.167238	No	0	ENSG00000178104	PDE4DIP	Intronic	39.8644	16.7027	28.2835	2.38671	0.00490514	Yes	0.752364	0.752066	0.752215	1.0004	0.998978	No
chr1:145005000-145005267:AluSp	chr1	145005000	145005267	AluSp	+	SINE/Alu	AluSp	19.366	8.47149	13.9187	2.28602	0.0613441	No	0	ENSG00000178104	PDE4DIP	Intronic	29.5251	12.7961	21.1606	2.30735	0.010907	Yes	0.598866	0.694645	0.646755	-1.15993	0.447925	No
chr1:145005579-145005930:L2c	chr1	145005579	145005930	L2c	+	LINE/L2	L2c	2.70816	1.12837	1.91826	2.40007	0.144568	No	0	ENSG00000178104	PDE4DIP	Intronic	0.93108	1.96191	1.4465	-2.10713	0.0996509	No	1.62634	0.955601	1.29097	1.7019	0.235527	No
chr1:145015161-145015649:MER44B	chr1	145015161	145015649	MER44B	+	DNA/TcMar-Tigger	MER44B	4.48501	2.01516	3.25009	2.22564	0.251824	No	0	ENSG00000178104	PDE4DIP	Intronic	4.88059	6.23833	5.55946	-1.27819	0.563454	No	3.70823	1.61085	2.65954	2.30203	0.102343	No
chr1:145016216-145016644:MLT1H	chr1	145016216	145016644	MLT1H	+	LTR/ERVL-MaLR	MLT1H	38.6364	13.2154	25.9259	2.92359	0.00870086	Yes	0	ENSG00000178104	PDE4DIP	Intronic	48.7212	34.4909	41.6061	1.41258	0.178866	No	3.00419	2.004	2.5041	1.4991	0.342807	No
chr1:145016645-145016853:MER58A	chr1	145016645	145016853	MER58A	-	DNA/hAT-Charlie	MER58A	9.28037	3.28352	6.28195	2.82635	0.0343037	Yes	0	ENSG00000178104	PDE4DIP	Intronic	1.61255	1.13766	1.37511	1.41743	0.466068	No	12.1872	16.2159	14.2015	-1.33056	0.381542	No
chr1:145016984-145017227:MIRc	chr1	145016984	145017227	MIRc	-	SINE/MIR	MIRc	19.1056	7.75734	13.4315	2.46291	0.0588607	No	0	ENSG00000178104	PDE4DIP	Intronic	1.24707	1.27932	1.26319	-1.02587	0.963026	No	15.0225	14.0251	14.5238	1.07111	0.870176	No
chr1:145031934-145032248:AluSx1	chr1	145031934	145032248	AluSx1	-	SINE/Alu	AluSx1	1.19747	0.609737	0.903606	1.96392	0.0725887	No	0	ENSG00000178104	PDE4DIP	Intronic	2.15735	1.09734	1.62735	1.96598	0.128585	No	0.979335	1.34211	1.16072	-1.37043	0.471513	No
chr1:145036327-145036500:L1M5	chr1	145036327	145036500	L1M5	-	LINE/L1	L1M5	0.683147	0.557291	0.620219	1.22584	0.516509	No	0	ENSG00000178104	PDE4DIP	Intronic	3.0355	1.27411	2.1548	2.38246	0.0847368	No	0.761183	0.843434	0.802308	-1.10806	0.712193	No
chr1:145038221-145038704:L3	chr1	145038221	145038704	L3	-	LINE/CR1	L3	2.09936	0.904255	1.50181	2.32164	0.178858	No	0	ENSG00000178104	PDE4DIP	Intronic	8.41653	2.92652	5.67153	2.87595	0.0490078	Yes	0.719771	0.74614	0.732955	-1.03664	0.884525	No
chr1:145045474-145047294:MLT1H1-int	chr1	145045474	145047294	MLT1H1-int|MLT1H1	+	LTR/ERVL-MaLR	MLT1H1-int	1.12908	1.89837	1.51372	-1.68135	0.427886	No	0	ENSG00000178104	PDE4DIP	Intronic	2.32818	4.02525	3.17671	-1.72893	0.152845	No	2.55228	0.936511	1.74439	2.7253	0.0858614	No
chr1:145047815-145053955:L1PA5	chr1	145047815	145053955	L1PA5	+	LINE/L1	L1PA5	3.19526	1.44651	2.32089	2.20894	0.262173	No	0	ENSG00000178104	PDE4DIP	Intronic	2.71376	4.59382	3.65379	-1.69279	0.222193	No	2.82448	1.0135	1.91899	2.78686	0.0771968	No
chr1:145070449-145071761:L1ME1	chr1	145070449	145071761	L1ME1	+	LINE/L1	L1ME1	49.5986	15.8416	32.7201	3.1309	0.00162231	Yes	0	ENSG00000178104	PDE4DIP	Intronic	0.76111	0.773908	0.767509	-1.01681	0.963361	No	102.284	27.1253	64.7046	3.77079	0.000211798	Yes
chr1:145072097-145072192:L2c	chr1	145072097	145072192	L2c	+	LINE/L2	L2c	4.67628	3.77011	4.2232	1.24036	0.792298	No	0	ENSG00000178104	PDE4DIP	Intronic	0.660275	0.66881	0.664542	-1.01293	0.94925	No	27.7293	10.2012	18.9652	2.71825	0.0101097	Yes
chr1:145072208-145072517:AluSz	chr1	145072208	145072517	AluSz	-	SINE/Alu	AluSz	20.0183	11.0403	15.5293	1.8132	0.137387	No	0	ENSG00000178104	PDE4DIP	Intronic	42.0043	16.5948	29.2995	2.53118	0.0110791	Yes	0.715016	0.915066	0.815041	-1.27978	0.302433	No
chr1:145072637-145072824:MamRep605	chr1	145072637	145072824	MamRep605	+	LTR?	MamRep605	14.7788	6.02621	10.4025	2.45241	0.0617197	No	0	ENSG00000178104	PDE4DIP	Intronic	0.553583	0.644829	0.599206	-1.16483	0.161292	No	14.8443	8.20468	11.5245	1.80925	0.152787	No
chr1:145072896-145073098:MamRep605	chr1	145072896	145073098	MamRep605	+	LTR?	MamRep605	14.2748	5.4109	9.84284	2.63815	0.131267	No	0	ENSG00000178104	PDE4DIP	Intronic	0.606628	0.696818	0.651723	-1.14867	0.396348	No	14.5797	7.71514	11.1474	1.88975	0.127846	No
chr1:145073123-145073439:AluJr	chr1	145073123	145073439	AluJr	+	SINE/Alu	AluJr	12.6002	9.38959	10.9949	1.34194	0.528879	No	0	ENSG00000178104	PDE4DIP	Intronic	0.536393	0.787665	0.662029	-1.46845	0.0432769	No	12.6826	8.15591	10.4193	1.55502	0.344574	No
chr1:145074696-145074815:MIR3	chr1	145074696	145074815	MIR3	-	SINE/MIR	MIR3	2.10122	1.82176	1.96149	1.1534	0.862091	No	0	ENSG00000178104	PDE4DIP	Intronic	4.66116	3.31458	3.98787	1.40626	0.409623	No	0.536704	0.640414	0.588559	-1.19324	0.102343	No
chr1:145115291-145115534:MIR	chr1	145115291	145115534	MIR	-	SINE/MIR	MIR	5.11924	2.66825	3.89374	1.91857	0.23071	No	-39106	ENSG00000178104	PDE4DIP	Intergenic	0.536393	0.64246	0.589426	-1.19774	0.0952777	No	12.4062	9.36602	10.8861	1.32459	0.350808	No
chr1:145118100-145118260:L2a	chr1	145118100	145118260	L2a	-	LINE/L2	L2a	35.6559	30.9677	33.3118	1.15139	0.685783	No	-41915	ENSG00000178104	PDE4DIP	Intergenic	0.565609	0.670884	0.618247	-1.18613	0.180205	No	80.5874	50.8192	65.7033	1.58577	0.0641908	No
chr1:145137496-145137781:AluSp	chr1	145137496	145137781	AluSp	+	SINE/Alu	AluSp	22.7854	17.6868	20.2361	1.28827	0.500887	No	-61311	ENSG00000178104	PDE4DIP	Intergenic	0.583067	0.640152	0.61161	-1.0979	0.428896	No	13.7702	7.59436	10.6823	1.81321	0.131915	No
chr1:14522240-14523833:L2a	chr1	14522240	14523833	L2a	-	LINE/L2	L2a	5.32123	0.505101	2.91317	10.535	9.49304e-07	Yes	370667	ENSG00000116731	PRDM2	Intergenic	0.536393	0.692932	0.614662	-1.29184	0.0952777	No	6.05351	0.741505	3.39751	8.16381	8.1066e-07	Yes
chr1:145286830-145287141:AluSq2	chr1	145286830	145287141	AluSq2	-	SINE/Alu	AluSq2	2.83448	2.04245	2.43846	1.38779	0.694124	No	0	ENSG00000213240	NOTCH2NL	Intronic	0.536393	0.640152	0.588272	-1.19344	0.0952777	No	2.69627	2.31845	2.50736	1.16296	0.769455	No
chr1:145287999-145289032:L1MB7	chr1	145287999	145289032	L1MB7	-	LINE/L1	L1MB7	17.2904	2.87707	10.0837	6.00973	0.00586373	Yes	0	ENSG00000213240	NOTCH2NL	Intronic	0.793013	0.911865	0.852439	-1.14987	0.61163	No	77.3505	35.5574	56.454	2.17537	0.0395719	Yes
chr1:145289021-145289266:L1MB7	chr1	145289021	145289266	L1MB7	+	LINE/L1	L1MB7	17.7127	7.23365	12.4732	2.44866	0.10912	No	0	ENSG00000213240	NOTCH2NL	Intronic	110.661	35.448	73.0543	3.12178	0.00106607	Yes	0.805844	0.921359	0.863601	-1.14335	0.645861	No
chr1:145372946-145373705:L1MEc	chr1	145372946	145373705	L1MEc	+	LINE/L1	L1MEc	1.55016	1.0575	1.30383	1.46586	0.532627	No	2644	ENSG00000163386	NBPF10	afterGene	0.536393	0.664042	0.600218	-1.23798	0.0952777	No	9.03373	14.9024	11.9681	-1.64964	0.102343	No
chr1:145373839-145374250:L1M3	chr1	145373839	145374250	L1M3	+	LINE/L1	L1M3	10.7035	7.96679	9.33514	1.34351	0.509897	No	3537	ENSG00000163386	NBPF10	afterGene	0.544596	0.684184	0.61439	-1.25631	0.0952777	No	35.8738	42.6534	39.2636	-1.18898	0.486935	No
chr1:145513710-145513929:L2c	chr1	145513710	145513929	L2c	+	LINE/L2	L2c	23.5403	20.9644	22.2523	1.12287	0.756259	No	175	ENSG00000131795	RBM8A	afterGene	20.393	34.0632	27.2281	-1.67034	0.0564879	No	0.600433	0.6436	0.622017	-1.07189	0.57787	No
chr1:145590432-145591353:L1MA4	chr1	145590432	145591353	L1MA4	-	LINE/L1	L1MA4	33.5205	65.4278	49.4742	-1.95187	0.0339986	No	-994	ENSG00000186364	NUDT17	Intergenic	98.8961	126.452	112.674	-1.27863	0.129462	No	1.82991	2.33448	2.0822	-1.27573	0.588051	No
chr1:145591649-145591807:L3	chr1	145591649	145591807	L3	+	LINE/CR1	L3	5.46773	5.62461	5.54617	-1.02869	0.963165	No	799	ENSG00000186141	POLR3C	afterGene	0.536393	0.661172	0.598783	-1.23263	0.0952777	No	17.1725	24.404	20.7883	-1.42111	0.135017	No
chr1:146692538-146693035:L1MC3	chr1	146692538	146693035	L1MC3	+	LINE/L1	L1MC3	12.5752	8.45096	10.5131	1.48802	0.470228	No	0	ENSG00000131781	FMO5	Intronic	46.4646	17.592	32.0283	2.64123	0.000844269	Yes	0.658101	0.644792	0.651447	1.02064	0.891067	No
chr1:14704821-14707493:L1MA3	chr1	14704821	14707493	L1MA3	+	LINE/L1	L1MA3	0.744381	0.667942	0.706161	1.11444	0.793449	No	-217708	ENSG00000189337	KAZN	Intergenic	1.66986	0.70366	1.18676	2.37311	0.0219374	Yes	0.536704	0.685346	0.611025	-1.27695	0.102343	No
chr1:147079473-147080358:L2b	chr1	147079473	147080358	L2b	-	LINE/L2	L2b	1.25351	3.74012	2.49682	-2.98372	0.138318	No	0	ENSG00000116128	BCL9	Intronic	2.53226	2.23494	2.3836	1.13303	0.780285	No	1.02126	12.8989	6.96008	-12.6303	2.41028e-08	Yes
chr1:147829664-147830333:LTR8	chr1	147829664	147830333	LTR8	+	LTR/ERV1	LTR8	6.01383	1.04781	3.53082	5.7394	0.00267875	Yes	124303	ENSG00000255963	PPIAL4A	Intergenic	0.655094	0.642131	0.648613	1.02019	0.924107	No	6.73241	2.31408	4.52324	2.90933	0.0334745	Yes
chr1:147831584-147831768:HAL1b	chr1	147831584	147831768	HAL1b	-	LINE/L1	HAL1b	2.46061	0.660425	1.56052	3.7258	0.0102386	Yes	122868	ENSG00000255963	PPIAL4A	Intergenic	6.83905	1.52203	4.18054	4.49338	0.00401674	Yes	0.544896	0.640414	0.592655	-1.1753	0.135017	No
chr1:147831810-147832075:AluSc	chr1	147831810	147832075	AluSc	-	SINE/Alu	AluSc	3.99745	1.2405	2.61897	3.22245	0.0673906	No	122561	ENSG00000255963	PPIAL4A	Intergenic	4.0814	1.2629	2.67215	3.23177	0.0169221	Yes	0.536704	0.640414	0.588559	-1.19324	0.102343	No
chr1:147919771-147919843:MER41B	chr1	147919771	147919843	MER41B	-	LTR/ERV1	MER41B	7.99045	1.80907	4.89976	4.41688	0.0222698	Yes	34793	ENSG00000255963	PPIAL4A	Intergenic	0.569121	0.708621	0.638871	-1.24511	0.108368	No	28.8586	5.31187	17.0852	5.43284	0.000223395	Yes
chr1:147994674-147994964:AluSz	chr1	147994674	147994964	AluSz	-	SINE/Alu	AluSz	1.08038	1.44243	1.26141	-1.33511	0.639837	No	8679	ENSG00000122497	NBPF14	Intergenic	1.63285	1.11086	1.37186	1.4699	0.375243	No	0.614233	0.753542	0.683887	-1.2268	0.33235	No
chr1:148549542-148552541:L1MDa	chr1	148549542	148552541	L1MDa	-	LINE/L1	L1MDa	2.10623	2.80658	2.45641	-1.33251	0.728343	No	-3439	ENSG00000243452	NBPF15	Intergenic	2.29185	2.64392	2.46788	-1.15362	0.737025	No	1.45599	5.6598	3.55789	-3.88727	0.00879435	Yes
chr1:148936741-148938004:L1MEc	chr1	148936741	148938004	L1MEc	+	LINE/L1	L1MEc	1.8832	0.636028	1.25961	2.96087	0.0175294	Yes	178431	ENSG00000203827	NBPF16	Intergenic	7.15466	2.20027	4.67746	3.25172	0.0269014	Yes	0.62567	0.672974	0.649322	-1.07561	0.639996	No
chr1:149225303-149225854:MER41E	chr1	149225303	149225854	MER41E	+	LTR/ERV1	MER41E	8.01562	25.6822	16.8489	-3.20402	0.00521249	Yes	174278	ENSG00000203818	HIST2H3PS2	Intergenic	9.54435	26.5956	18.07	-2.78653	0.00145892	Yes	0.621843	0.644792	0.633317	-1.0369	0.804979	No
chr1:149233802-149235735:LTR49-int	chr1	149233802	149235735	LTR49|LTR49-int|LTR49-int	+	LTR/ERV1	LTR49-int	9.76621	5.52053	7.64337	1.76907	0.236016	No	164397	ENSG00000203818	HIST2H3PS2	Intergenic	13.8858	9.19799	11.5419	1.50966	0.166397	No	0.536704	0.672738	0.604721	-1.25346	0.102343	No
chr1:149393154-149393747:L2a	chr1	149393154	149393747	L2a	-	LINE/L2	L2a	14.3229	3.44629	8.8846	4.15604	0.00723178	Yes	6385	ENSG00000203818	HIST2H3PS2	Intergenic	22.5833	18.8844	20.7339	1.19587	0.568767	No	0.640394	0.86498	0.752687	-1.3507	0.366369	No
chr1:149394078-149394379:AluSx1	chr1	149394078	149394379	AluSx1	+	SINE/Alu	AluSx1	3.73412	2.64942	3.19177	1.40941	0.575201	No	5753	ENSG00000203818	HIST2H3PS2	Intergenic	0.584232	0.742432	0.663332	-1.27078	0.292378	No	4.55296	5.27213	4.91255	-1.15795	0.729735	No
chr1:149771366-149772169:MER21B	chr1	149771366	149772169	MER21B	-	LTR/ERVL	MER21B	12.6874	2.47458	7.58098	5.12708	0.00511929	Yes	0	ENSG00000203814	HIST2H2BF	Intronic	0.569198	0.845015	0.707106	-1.48457	0.0952777	No	19.8576	4.10179	11.9797	4.84119	0.00022003	Yes
chr1:149777403-149777754:MLT1J	chr1	149777403	149777754	MLT1J	-	LTR/ERVL-MaLR	MLT1J	1.03332	0.771743	0.902534	1.33895	0.568912	No	0	ENSG00000203814	HIST2H2BF	Intronic	2.66089	7.36737	5.01413	-2.76876	0.00934342	Yes	0.69456	0.728299	0.711429	-1.04858	0.874754	No
chr1:149778164-149778748:L2a	chr1	149778164	149778748	L2a	-	LINE/L2	L2a	1.40171	1.73339	1.56755	-1.23662	0.766369	No	0	ENSG00000203814	HIST2H2BF	Intronic	5.24942	17.3721	11.3107	-3.30933	0.00273894	Yes	2.31747	1.16242	1.73994	1.99365	0.135387	No
chr1:149782693-149782882:MER20	chr1	149782693	149782882	MER20	-	DNA/hAT-Charlie	MER20	1.21145	0.850358	1.0309	1.42464	0.543419	No	0	ENSG00000203814	HIST2H2BF	Intronic	3.69208	4.86162	4.27685	-1.31677	0.529487	No	0.609923	0.762468	0.686196	-1.2501	0.222203	No
chr1:149815821-149815927:MER5A	chr1	149815821	149815927	MER5A	+	DNA/hAT-Charlie	MER5A	3.36445	14.5802	8.97235	-4.33361	0.00552191	Yes	-1344	ENSG00000183558	HIST2H2AA3	Intergenic	7.35989	24.9918	16.1758	-3.39567	4.42672e-05	Yes	0.858818	1.09346	0.976138	-1.27321	0.524991	No
chr1:149820500-149820779:L2	chr1	149820500	149820779	L2	+	LINE/L2	L2	4.47276	22.3939	13.4333	-5.00672	0.000329127	Yes	-1865	ENSG00000203812	HIST2H2AA4	Intergenic	1.19574	1.44193	1.31883	-1.2059	0.668548	No	6.20387	57.6094	31.9066	-9.28603	1.26575e-10	Yes
chr1:149878619-149878874:Charlie22a	chr1	149878619	149878874	Charlie22a	-	DNA/hAT-Charlie	Charlie22a	4.7687	2.63055	3.69963	1.81281	0.456368	No	0	ENSG00000159164	SV2A	Intronic	28.0324	34.1272	31.0798	-1.21742	0.486429	No	0.544896	0.642736	0.593816	-1.17956	0.130788	No
chr1:149878995-149879167:Charlie19a	chr1	149878995	149879167	Charlie19a	-	DNA/hAT-Charlie	Charlie19a	6.98318	3.03288	5.00803	2.30249	0.19972	No	0	ENSG00000159164	SV2A	Intronic	22.6267	27.8739	25.2503	-1.2319	0.477581	No	0.594113	0.640414	0.617264	-1.07793	0.54143	No
chr1:149923965-149930070:L1PA5	chr1	149923965	149930070	L1PA5	-	LINE/L1	L1PA5	8.64035	1.77734	5.20884	4.8614	0.0156373	Yes	0	ENSG00000163113	OTUD7B	Intronic	20.6671	18.5226	19.5949	1.11577	0.748892	No	0.56344	0.695256	0.629348	-1.23395	0.136281	No
chr1:149932284-149932604:AluSq2	chr1	149932284	149932604	AluSq2	-	SINE/Alu	AluSq2	1.7847	0.608435	1.19657	2.93326	0.0139279	Yes	0	ENSG00000163113	OTUD7B	Intronic	4.40952	1.8008	3.10516	2.44865	0.0952777	No	0.536704	0.670152	0.603428	-1.24864	0.102343	No
chr1:150018198-150018420:L2a	chr1	150018198	150018420	L2a	+	LINE/L2	L2a	16.094	12.2281	14.1611	1.31614	0.532571	No	-20950	ENSG00000136631	VPS45	Intergenic	0.556911	0.935682	0.746296	-1.68013	0.0370242	No	34.2578	32.2256	33.2417	1.06306	0.807738	No
chr1:150019060-150019547:L2a	chr1	150019060	150019547	L2a	+	LINE/L2	L2a	17.6633	15.5747	16.619	1.1341	0.74692	No	-19823	ENSG00000136631	VPS45	Intergenic	0.556911	0.82733	0.69212	-1.48557	0.0952777	No	35.3414	33.0899	34.2157	1.06804	0.795779	No
chr1:150124520-150124792:AluJb	chr1	150124520	150124792	AluJb	-	SINE/Alu	AluJb	3.61634	2.41666	3.0165	1.49642	0.6079	No	0	ENSG00000023902	PLEKHO1	Intronic	0.536393	0.640152	0.588272	-1.19344	0.0952777	No	5.56016	13.5475	9.55382	-2.43653	0.0050924	Yes
chr1:150130599-150130892:AluSz	chr1	150130599	150130892	AluSz	+	SINE/Alu	AluSz	0.965601	2.02864	1.49712	-2.10091	0.272619	No	0	ENSG00000023902	PLEKHO1	Intronic	8.11574	19.3858	13.7508	-2.38867	0.0112772	Yes	0.544896	0.640414	0.592655	-1.1753	0.135017	No
chr1:15023505-15023855:AluJo	chr1	15023505	15023855	AluJo	+	SINE/Alu	AluJo	1.20405	0.979202	1.09163	1.22962	0.735627	No	0	ENSG00000189337	KAZN	Intronic	4.17066	5.34463	4.75764	-1.28148	0.600633	No	0.591463	0.670152	0.630807	-1.13304	0.350927	No
chr1:150250673-150251300:L2d2	chr1	150250673	150251300	L2d2	-	LINE/L2	L2d2	2.36073	0.529282	1.44501	4.46026	0.00161877	Yes	0	ENSG00000118292	C1orf54	Intronic	0.608475	0.666273	0.637374	-1.09499	0.50829	No	12.0795	6.19656	9.13805	1.9494	0.102343	No
chr1:150281431-150281731:AluSq10	chr1	150281431	150281731	AluSq10	-	SINE/Alu	AluSq10	12.7365	23.1421	17.9393	-1.817	0.119763	No	18	ENSG00000187145	MRPS21	afterGene	0.536393	0.644352	0.590372	-1.20127	0.0952777	No	33.6231	49.4139	41.5185	-1.46964	0.102343	No
chr1:150281738-150282033:AluYj4	chr1	150281738	150282033	AluYj4	-	SINE/Alu	AluYj4	40.1596	69.4075	54.7835	-1.72829	0.0539587	No	325	ENSG00000187145	MRPS21	afterGene	0.536393	0.689199	0.612796	-1.28488	0.0952777	No	68.9777	78.8478	73.9128	-1.14309	0.540832	No
chr1:150319282-150319581:AluJb	chr1	150319282	150319581	AluJb	+	SINE/Alu	AluJb	3.17407	1.61737	2.39572	1.96249	0.375247	No	0	ENSG00000117360	PRPF3	Intronic	6.41943	20.4873	13.4534	-3.19145	0.00020413	Yes	0.544896	0.640414	0.592655	-1.1753	0.135017	No
chr1:150508433-150508717:L2d	chr1	150508433	150508717	L2d	-	LINE/L2	L2d	24.4662	4.32228	14.3942	5.66049	0.00170931	Yes	-13168	ENSG00000143382	ADAMTSL4	Intergenic	0.652804	0.698732	0.675768	-1.07035	0.690252	No	37.1155	9.23714	23.1763	4.01807	7.13447e-06	Yes
chr1:150567597-150567902:AluJb	chr1	150567597	150567902	AluJb	+	SINE/Alu	AluJb	2.0174	1.22319	1.6203	1.6493	0.434189	No	5426	ENSG00000143420	ENSA	Intergenic	0.971361	1.07595	1.02366	-1.10767	0.772541	No	5.02907	9.73642	7.38275	-1.93603	0.102343	No
chr1:150572673-150572957:AluJr	chr1	150572673	150572957	AluJr	-	SINE/Alu	AluJr	1.29463	2.21481	1.75472	-1.71076	0.462808	No	371	ENSG00000143420	ENSA	afterGene	7.60552	10.8556	9.23053	-1.42733	0.292061	No	0.536704	0.658565	0.597634	-1.22706	0.102343	No
chr1:150574890-150575067:AluSz	chr1	150574890	150575067	AluSz	-	SINE/Alu	AluSz	1.71816	1.30001	1.50909	1.32165	0.691097	No	0	ENSG00000143420	ENSA	Intronic	7.13173	11.4037	9.26771	-1.59901	0.253419	No	0.536704	0.719898	0.628301	-1.34133	0.0803307	No
chr1:150575330-150575637:AluSx3	chr1	150575330	150575637	AluSx3	-	SINE/Alu	AluSx3	2.90428	1.71051	2.3074	1.69791	0.403808	No	0	ENSG00000143420	ENSA	Intronic	10.3416	16.096	13.2188	-1.55643	0.182438	No	0.544896	0.778389	0.661642	-1.42851	0.0765585	No
chr1:150575891-150576213:L3	chr1	150575891	150576213	L3	+	LINE/CR1	L3	2.89794	1.33176	2.11485	2.17602	0.25335	No	0	ENSG00000143420	ENSA	Intronic	0.556911	0.742073	0.649492	-1.33248	0.0952777	No	13.593	27.2567	20.4249	-2.0052	0.0265042	Yes
chr1:150577043-150577558:LTR78	chr1	150577043	150577558	LTR78	-	LTR/ERV1	LTR78	2.5362	2.5314	2.5338	1.0019	0.998236	No	0	ENSG00000143420	ENSA	Intronic	12.915	22.2341	17.5745	-1.72157	0.0952777	No	0.544896	0.749365	0.64713	-1.37524	0.0778661	No
chr1:150582584-150582730:FLAM_A	chr1	150582584	150582730	FLAM_A	-	SINE/Alu	FLAM_A	21.2177	7.49499	14.3563	2.83091	0.0289638	Yes	0	ENSG00000143420	ENSA	Intronic	27.9916	27.4369	27.7142	1.02022	0.944375	No	0.60044	0.744872	0.672656	-1.24054	0.197521	No
chr1:150582787-150583078:AluSx1	chr1	150582787	150583078	AluSx1	-	SINE/Alu	AluSx1	47.2303	12.6256	29.9279	3.74084	0.0103838	Yes	0	ENSG00000143420	ENSA	Intronic	30.3799	23.9818	27.1809	1.26679	0.306402	No	0.536704	0.670496	0.6036	-1.24929	0.102343	No
chr1:150583136-150583415:AluJo	chr1	150583136	150583415	AluJo	-	SINE/Alu	AluJo	33.1718	15.4437	24.3078	2.14792	0.186181	No	0	ENSG00000143420	ENSA	Intronic	30.1144	38.3683	34.2413	-1.27408	0.326238	No	0.536704	0.64212	0.589412	-1.19642	0.102343	No
chr1:150583452-150583755:AluSz	chr1	150583452	150583755	AluSz	-	SINE/Alu	AluSz	23.4981	9.5703	16.5342	2.45532	0.0642184	No	0	ENSG00000143420	ENSA	Intronic	24.3051	29.1695	26.7373	-1.20014	0.452041	No	0.553941	0.699588	0.626764	-1.26293	0.105477	No
chr1:150584304-150584599:AluJo	chr1	150584304	150584599	AluJo	-	SINE/Alu	AluJo	40.2221	15.2117	27.7169	2.64416	0.0703245	No	0	ENSG00000143420	ENSA	Intronic	42.3797	41.4467	41.9132	1.02251	0.93197	No	0.536704	0.691717	0.61421	-1.28883	0.102343	No
chr1:150585192-150585386:MER20	chr1	150585192	150585386	MER20	+	DNA/hAT-Charlie	MER20	35.2621	11.0265	23.1443	3.19795	0.00999845	Yes	0	ENSG00000143420	ENSA	Intronic	0.536393	0.686779	0.611586	-1.28037	0.0952777	No	35.5307	32.699	34.1149	1.0866	0.764303	No
chr1:150585473-150585755:AluSq2	chr1	150585473	150585755	AluSq2	+	SINE/Alu	AluSq2	20.9783	7.30616	14.1423	2.87132	0.058136	No	0	ENSG00000143420	ENSA	Intronic	0.544596	0.640152	0.592374	-1.17546	0.127035	No	11.5291	17.7571	14.6431	-1.54019	0.111647	No
chr1:150585961-150586076:MIR3	chr1	150585961	150586076	MIR3	+	SINE/MIR	MIR3	17.7195	8.28985	13.0047	2.1375	0.228253	No	0	ENSG00000143420	ENSA	Intronic	0.536393	0.640152	0.588272	-1.19344	0.0952777	No	31.4012	27.4625	29.4319	1.14342	0.609526	No
chr1:150586462-150586750:AluJr	chr1	150586462	150586750	AluJr	-	SINE/Alu	AluJr	43.8434	17.4951	30.6692	2.50603	0.0275518	Yes	0	ENSG00000143420	ENSA	Intronic	55.5974	40.6456	48.1215	1.36786	0.152905	No	0.721859	0.695839	0.708849	1.03739	0.849913	No
chr1:150586840-150587120:AluJo	chr1	150586840	150587120	AluJo	-	SINE/Alu	AluJo	32.4038	10.3209	21.3624	3.13962	0.0376881	Yes	0	ENSG00000143420	ENSA	Intronic	29.3389	23.3097	26.3243	1.25866	0.34739	No	0.536704	0.640414	0.588559	-1.19324	0.102343	No
chr1:150587280-150587598:AluSx3	chr1	150587280	150587598	AluSx3	-	SINE/Alu	AluSx3	25.6906	7.7609	16.7258	3.31026	0.0154209	Yes	0	ENSG00000143420	ENSA	Intronic	24.8877	16.4305	20.6591	1.51473	0.103742	No	0.536704	0.642394	0.589549	-1.19693	0.102343	No
chr1:150587893-150588184:AluJr	chr1	150587893	150588184	AluJr	-	SINE/Alu	AluJr	64.2999	18.6149	41.4574	3.45423	0.011332	Yes	0	ENSG00000143420	ENSA	Intronic	55.7457	38.2907	47.0182	1.45585	0.102417	No	0.700379	0.776974	0.738677	-1.10936	0.650387	No
chr1:150588427-150588484:L2b	chr1	150588427	150588484	L2b	+	LINE/L2	L2b	27.4319	7.42865	17.4303	3.69271	0.00528551	Yes	0	ENSG00000143420	ENSA	Intronic	0.544596	0.650171	0.597384	-1.19386	0.101416	No	19.8436	15.0508	17.4472	1.31845	0.347401	No
chr1:150588687-150588762:L2c	chr1	150588687	150588762	L2c	+	LINE/L2	L2c	11.8696	3.43081	7.65021	3.45972	0.0221351	Yes	0	ENSG00000143420	ENSA	Intronic	0.536393	0.640152	0.588272	-1.19344	0.0952777	No	20.6456	14.784	17.7148	1.39648	0.29766	No
chr1:150588788-150589080:AluSq2	chr1	150588788	150589080	AluSq2	-	SINE/Alu	AluSq2	33.0699	11.8042	22.4371	2.80155	0.0336312	Yes	0	ENSG00000143420	ENSA	Intronic	25.5682	20.2363	22.9023	1.26348	0.406815	No	0.594184	0.696334	0.645259	-1.17192	0.278215	No
chr1:150589278-150589436:AluSg4	chr1	150589278	150589436	AluSg4	-	SINE/Alu	AluSg4	18.4895	5.27621	11.8828	3.5043	0.0308395	Yes	0	ENSG00000143420	ENSA	Intronic	17.2219	9.85421	13.538	1.74767	0.119049	No	0.763544	0.642394	0.702969	1.18859	0.259818	No
chr1:150589513-150589795:L2c	chr1	150589513	150589795	L2c	+	LINE/L2	L2c	27.2455	9.94461	18.5951	2.73973	0.0668067	No	0	ENSG00000143420	ENSA	Intronic	0.637072	0.719475	0.678274	-1.12935	0.510918	No	37.1882	24.2552	30.7217	1.5332	0.152208	No
chr1:150589796-150590092:AluSp	chr1	150589796	150590092	AluSp	-	SINE/Alu	AluSp	23.0486	6.76643	14.9075	3.40632	0.0210008	Yes	0	ENSG00000143420	ENSA	Intronic	22.6143	15.2427	18.9285	1.48361	0.18468	No	0.59139	0.723305	0.657348	-1.22306	0.210606	No
chr1:150590278-150590498:AluSq	chr1	150590278	150590498	AluSq	-	SINE/Alu	AluSq	8.45085	4.833	6.64193	1.74857	0.39496	No	0	ENSG00000143420	ENSA	Intronic	12.3553	10.2293	11.2923	1.20784	0.572747	No	0.536704	0.640414	0.588559	-1.19324	0.102343	No
chr1:150590840-150591122:AluSz6	chr1	150590840	150591122	AluSz6	+	SINE/Alu	AluSz6	22.6896	5.0301	13.8598	4.51076	0.0289168	Yes	0	ENSG00000143420	ENSA	Intronic	0.536393	0.640152	0.588272	-1.19344	0.0952777	No	19.8702	11.2866	15.5784	1.76051	0.102343	No
chr1:150591470-150591761:AluSz	chr1	150591470	150591761	AluSz	+	SINE/Alu	AluSz	17.627	4.77482	11.2009	3.69166	0.0375451	Yes	0	ENSG00000143420	ENSA	Intronic	0.536393	0.640152	0.588272	-1.19344	0.0952777	No	16.2173	13.6157	14.9165	1.19107	0.552033	No
chr1:150591828-150591957:L2c	chr1	150591828	150591957	L2c	+	LINE/L2	L2c	14.2665	3.6745	8.97049	3.88256	0.0205347	Yes	0	ENSG00000143420	ENSA	Intronic	0.536393	0.640152	0.588272	-1.19344	0.0952777	No	14.7864	8.7018	11.7441	1.69924	0.110798	No
chr1:150591965-150592164:L2d	chr1	150591965	150592164	L2d	+	LINE/L2	L2d	27.0044	6.65272	16.8286	4.05915	0.00959707	Yes	0	ENSG00000143420	ENSA	Intronic	0.594013	0.640152	0.617082	-1.07767	0.539508	No	23.9102	12.8547	18.3824	1.86004	0.102343	No
chr1:150593279-150593579:AluJb	chr1	150593279	150593579	AluJb	+	SINE/Alu	AluJb	18.7887	5.51656	12.1526	3.40587	0.0386721	Yes	0	ENSG00000143420	ENSA	Intronic	0.544596	0.64246	0.593528	-1.1797	0.123412	No	7.59923	7.21976	7.40949	1.05256	0.911434	No
chr1:150605362-150607138:HERVK-int	chr1	150605362	150607138	HERVK-int	-	LTR/ERVK	HERVK-int	12.1632	3.77314	7.96819	3.22364	0.0607912	No	-3275	ENSG00000143420	ENSA	Intergenic	0.800577	0.706061	0.753319	1.13386	0.601046	No	69.91	76.0121	72.961	-1.08728	0.752512	No
chr1:150607126-150608361:HERVK-int	chr1	150607126	150608361	HERVK-int|LTR5_Hs	+	LTR/ERVK	HERVK-int	22.8623	12.32	17.5912	1.8557	0.11353	No	-5039	ENSG00000143420	ENSA	Intergenic	90.3192	67.5348	78.927	1.33737	0.189792	No	2.28147	1.32888	1.80517	1.71684	0.226187	No
chr1:15096231-15097013:L2b	chr1	15096231	15097013	L2b	-	LINE/L2	L2b	1.58349	0.938319	1.26091	1.68758	0.343532	No	0	ENSG00000189337	KAZN	Intronic	0.536393	0.640152	0.588272	-1.19344	0.0952777	No	1.71973	2.02706	1.87339	-1.17871	0.757569	No
chr1:150965779-150966085:AluSx1	chr1	150965779	150966085	AluSx1	-	SINE/Alu	AluSx1	31.5343	18.412	24.9732	1.7127	0.380842	No	0	ENSG00000143412	ANXA9	Intronic	44.8005	59.9789	52.3897	-1.3388	0.226306	No	0.684302	0.640414	0.662358	1.06853	0.660563	No
chr1:150966098-150966409:AluSq	chr1	150966098	150966409	AluSq	-	SINE/Alu	AluSq	21.0987	10.1125	15.6056	2.08641	0.137514	No	0	ENSG00000143412	ANXA9	Intronic	15.6479	20.3498	17.9989	-1.30048	0.406254	No	0.560789	0.767237	0.664013	-1.36814	0.102343	No
chr1:150967289-150967578:AluSg	chr1	150967289	150967578	AluSg	+	SINE/Alu	AluSg	24.226	11.0268	17.6264	2.19701	0.133382	No	0	ENSG00000143412	ANXA9	Intronic	0.536393	0.640152	0.588272	-1.19344	0.0952777	No	11.0762	13.0638	12.07	-1.17945	0.608088	No
chr1:150968598-150968904:AluSz	chr1	150968598	150968904	AluSz	+	SINE/Alu	AluSz	16.3498	9.46995	12.9099	1.7265	0.287729	No	122	ENSG00000143409	FAM63A	afterGene	0.536393	0.659078	0.597735	-1.22872	0.0952777	No	11.8553	20.5066	16.181	-1.72974	0.0785177	No
chr1:151022430-151022573:MIR	chr1	151022430	151022573	MIR	-	SINE/MIR	MIR	11.3446	17.3345	14.3395	-1.528	0.217084	No	0	ENSG00000143443	C1orf56	Intronic	1.57847	1.00458	1.29153	1.57128	0.245519	No	21.2705	33.0343	27.1524	-1.55305	0.102343	No
chr1:151027283-151027392:MIR3	chr1	151027283	151027392	MIR3	-	SINE/MIR	MIR3	8.60956	2.75221	5.68089	3.12823	0.125658	No	0	ENSG00000197622	CDC42SE1	Intronic	37.0773	48.1754	42.6264	-1.29932	0.245709	No	0.605828	1.00048	0.803152	-1.65142	0.0654577	No
chr1:15108761-15109073:AluSx	chr1	15108761	15109073	AluSx	+	SINE/Alu	AluSx	1.06632	0.697354	0.881837	1.52909	0.320773	No	0	ENSG00000189337	KAZN	Intronic	3.13419	5.54808	4.34113	-1.77018	0.155227	No	0.536704	0.640414	0.588559	-1.19324	0.102343	No
chr1:151149581-151149892:AluSg	chr1	151149581	151149892	AluSg	+	SINE/Alu	AluSg	2.99685	1.91573	2.45629	1.56434	0.58685	No	0	ENSG00000163159	VPS72	Intronic	0.536393	0.641892	0.589142	-1.19668	0.0952777	No	7.17055	41.088	24.1293	-5.73011	8.4147e-08	Yes
chr1:151150061-151150341:AluJb	chr1	151150061	151150341	AluJb	+	SINE/Alu	AluJb	4.00507	2.2639	3.13449	1.7691	0.406142	No	0	ENSG00000163159	VPS72	Intronic	0.553583	0.640152	0.596867	-1.15638	0.179605	No	6.60574	33.3328	19.9692	-5.04603	7.94128e-08	Yes
chr1:151153212-151153711:L2a	chr1	151153212	151153711	L2a	+	LINE/L2	L2a	1.79788	1.24697	1.52242	1.4418	0.588286	No	0	ENSG00000163159	VPS72	Intronic	0.544596	0.677633	0.611114	-1.24429	0.0952777	No	3.79092	13.257	8.52396	-3.49704	0.000558964	Yes
chr1:151154805-151155621:L2a	chr1	151154805	151155621	L2a	+	LINE/L2	L2a	2.46209	1.41669	1.93939	1.73792	0.416408	No	0	ENSG00000163159	VPS72	Intronic	0.553583	0.783451	0.668517	-1.41524	0.0952777	No	4.5548	14.5099	9.53236	-3.18563	0.00360807	Yes
chr1:15115876-15116131:L2d2	chr1	15115876	15116131	L2d2	+	LINE/L2	L2d2	0.829793	0.806795	0.818294	1.02851	0.961188	No	0	ENSG00000189337	KAZN	Intronic	2.9791	5.4981	4.2386	-1.84556	0.163907	No	0.536704	0.640414	0.588559	-1.19324	0.102343	No
chr1:15116293-15116346:L2a	chr1	15116293	15116346	L2a	+	LINE/L2	L2a	0.572398	0.508686	0.540542	1.12525	0.654702	No	0	ENSG00000189337	KAZN	Intronic	0.837624	1.20034	1.01898	-1.43303	0.353172	No	0.536704	0.640414	0.588559	-1.19324	0.102343	No
chr1:151397937-151398664:L1MB3	chr1	151397937	151398664	L1MB3	-	LINE/L1	L1MB3	3.353	5.23981	4.2964	-1.56273	0.56365	No	0	ENSG00000143442	POGZ	Intronic	6.42343	43.2448	24.8341	-6.73235	2.22433e-07	Yes	0.536704	0.693195	0.614949	-1.29158	0.0939662	No
chr1:151421061-151421343:AluJb	chr1	151421061	151421343	AluJb	+	SINE/Alu	AluJb	2.13345	3.13047	2.63196	-1.46733	0.65165	No	0	ENSG00000143442	POGZ	Intronic	0.536393	0.640152	0.588272	-1.19344	0.0952777	No	3.07208	4.53969	3.80589	-1.47773	0.465096	No
chr1:151422854-151423129:AluJb	chr1	151422854	151423129	AluJb	-	SINE/Alu	AluJb	2.95637	2.96346	2.95991	-1.0024	0.997687	No	0	ENSG00000143442	POGZ	Intronic	3.19375	2.64413	2.91894	1.20786	0.702908	No	0.536704	0.640414	0.588559	-1.19324	0.102343	No
chr1:151427977-151428368:Charlie1a	chr1	151427977	151428368	Charlie1a	-	DNA/hAT-Charlie	Charlie1a	3.73921	1.80901	2.77411	2.06699	0.2847	No	0	ENSG00000143442	POGZ	Intronic	8.10782	4.75421	6.43101	1.7054	0.241179	No	0.536704	0.640414	0.588559	-1.19324	0.102343	No
chr1:151672835-151672924:L2a	chr1	151672835	151672924	L2a	-	LINE/L2	L2a	1.47174	12.502	6.98685	-8.49471	0.000298584	Yes	1269	ENSG00000143376	SNX27	afterGene	4.55401	47.7981	26.176	-10.4958	3.92467e-11	Yes	0.598376	1.03706	0.817716	-1.73312	0.102343	No
chr1:151709143-151711223:MSTA-int	chr1	151709143	151711223	MSTA|MSTA-int|MSTA	+	LTR/ERVL-MaLR	MSTA-int	23.1	2.58076	12.8404	8.95086	4.12557e-05	Yes	6863	ENSG00000178796	RIIAD1	Intergenic	37.3445	5.78293	21.5637	6.45772	9.01053e-06	Yes	2.17761	1.06269	1.62015	2.04915	0.102343	No
chr1:151767403-151767697:AluSz	chr1	151767403	151767697	AluSz	-	SINE/Alu	AluSz	2.71458	6.56586	4.64022	-2.41874	0.0803119	No	-3512	ENSG00000182134	TDRKH	Intergenic	0.527424	0.662277	0.594851	-1.25568	0.179605	No	5.92197	6.83796	6.37997	-1.15468	0.735003	No
chr1:151769997-151770221:MIRb	chr1	151769997	151770221	MIRb	+	SINE/MIR	MIRb	6.5785	6.67292	6.62571	-1.01435	0.98362	No	2520	ENSG00000213171	LINGO4	afterGene	12.96	16.6336	14.7968	-1.28346	0.37472	No	0.745686	0.655798	0.700742	1.13707	0.553262	No
chr1:151823037-151823265:MIRc	chr1	151823037	151823265	MIRc	-	SINE/MIR	MIRc	51.841	1.71513	26.7781	30.2257	1.64171e-07	Yes	0	ENSG00000196407	THEM5	Intronic	0.591056	0.640152	0.615604	-1.08306	0.510465	No	46.4364	2.85713	24.6468	16.2528	3.06086e-09	Yes
chr1:151823905-151824160:MamTip1	chr1	151823905	151824160	MamTip1	-	DNA/hAT-Tip100	MamTip1	34.3178	1.42508	17.8715	24.0814	1.59159e-06	Yes	0	ENSG00000196407	THEM5	Intronic	0.631143	0.640152	0.635647	-1.01427	0.921918	No	51.2296	2.16209	26.6959	23.6945	7.06422e-11	Yes
chr1:151827855-151828153:AluSq	chr1	151827855	151828153	AluSq	-	SINE/Alu	AluSq	38.2888	0.690937	19.4899	55.4157	1.59435e-08	Yes	-1683	ENSG00000196407	THEM5	Intergenic	0.536393	0.640152	0.588272	-1.19344	0.0952777	No	54.007	2.4769	28.2419	21.8042	1.39235e-10	Yes
chr1:151828279-151828865:LTR61	chr1	151828279	151828865	LTR61	+	LTR/ERV1	LTR61	88.3942	0.826281	44.6102	106.978	4.71608e-09	Yes	-2107	ENSG00000196407	THEM5	Intergenic	190.225	5.61768	97.9213	33.8618	8.00501e-16	Yes	1.01202	0.640414	0.826219	1.58026	0.0473484	No
chr1:151844985-151845971:LTR5B	chr1	151844985	151845971	LTR5B	+	LTR/ERVK	LTR5B	23.7499	4.26358	14.0067	5.57041	0.00139228	Yes	90	ENSG00000159445	THEM4	afterGene	0.990998	0.705161	0.848079	1.40535	0.156372	No	19.5687	9.84437	14.7065	1.98781	0.0820796	No
chr1:15199684-15200694:L2a	chr1	15199684	15200694	L2a	-	LINE/L2	L2a	2.69919	2.01103	2.35511	1.34219	0.691503	No	0	ENSG00000189337	KAZN	Intronic	0.544596	0.74435	0.644473	-1.36679	0.0952777	No	5.00749	8.29211	6.6498	-1.65594	0.147369	No
chr1:153562071-153562370:AluSp	chr1	153562071	153562370	AluSp	+	SINE/Alu	AluSp	3.60476	0.606417	2.10559	5.94435	0.00038034	Yes	16993	ENSG00000188643	S100A16	Intergenic	0.536393	0.640152	0.588272	-1.19344	0.0952777	No	5.97365	0.963843	3.46875	6.19774	0.00010843	Yes
chr1:153576559-153578015:HUERS-P3b-int	chr1	153576559	153578015	HUERS-P3b-int|LTR9B	+	LTR/ERV1	HUERS-P3b-int	25.9322	2.87872	14.4054	9.00821	0.000215177	Yes	1348	ENSG00000188643	S100A16	afterGene	0.669069	0.688566	0.678818	-1.02914	0.878764	No	44.684	8.75041	26.7172	5.10651	1.16861e-05	Yes
chr1:153578254-153578488:LTR9B	chr1	153578254	153578488	LTR9B	+	LTR/ERV1	LTR9B	5.77621	1.01581	3.39601	5.68628	0.00279229	Yes	875	ENSG00000188643	S100A16	afterGene	0.536393	0.640152	0.588272	-1.19344	0.0952777	No	8.00123	2.43928	5.22026	3.28015	0.00951708	Yes
chr1:153578489-153578799:AluSp	chr1	153578489	153578799	AluSp	+	SINE/Alu	AluSp	5.06849	1.16068	3.11459	4.36683	0.00740768	Yes	564	ENSG00000188643	S100A16	afterGene	0.536393	0.640152	0.588272	-1.19344	0.0952777	No	1.89796	0.841352	1.36966	2.25585	0.0592977	No
chr1:153578800-153579055:LTR9B	chr1	153578800	153579055	LTR9B	+	LTR/ERV1	LTR9B	4.75019	1.13092	2.94056	4.2003	0.0156734	Yes	308	ENSG00000188643	S100A16	afterGene	0.604872	0.646545	0.625709	-1.0689	0.599049	No	11.7546	2.7768	7.26568	4.23313	0.00105132	Yes
chr1:153922413-153922688:AluJb	chr1	153922413	153922688	AluJb	-	SINE/Alu	AluJb	2.42926	1.25321	1.84123	1.93843	0.379177	No	0	ENSG00000160741	CRTC2	Intronic	6.07147	14.675	10.3732	-2.41703	0.0155973	Yes	0.536704	0.640414	0.588559	-1.19324	0.102343	No
chr1:15425329-15425630:L2c	chr1	15425329	15425630	L2c	-	LINE/L2	L2c	1.17618	2.49322	1.8347	-2.11976	0.325473	No	0	ENSG00000189337	KAZN	Intronic	0.903374	0.709671	0.806522	1.27295	0.462665	No	4.46404	15.7415	10.1028	-3.52629	0.000917521	Yes
chr1:15425732-15425939:L2a	chr1	15425732	15425939	L2a	-	LINE/L2	L2a	1.56697	2.18327	1.87512	-1.39331	0.710964	No	0	ENSG00000189337	KAZN	Intronic	0.570263	0.750242	0.660252	-1.31561	0.36554	No	5.3764	16.0507	10.7136	-2.9854	0.00447171	Yes
chr1:1542717-1543018:AluSx1	chr1	1542717	1543018	AluSx1	-	SINE/Alu	AluSx1	6.09389	2.12349	4.10869	2.86976	0.0887127	No	-7242	ENSG00000228594	C1orf233	Intergenic	0.536393	0.640152	0.588272	-1.19344	0.0952777	No	6.86698	2.63816	4.75257	2.60294	0.0867915	No
chr1:154312376-154312675:AluJr	chr1	154312376	154312675	AluJr	+	SINE/Alu	AluJr	7.37465	1.49303	4.43384	4.9394	0.0140113	Yes	0	ENSG00000143515	ATP8B2	Intronic	9.73757	13.1948	11.4662	-1.35504	0.333118	No	0.544896	0.640414	0.592655	-1.1753	0.135017	No
chr1:1543821-1544136:AluJr	chr1	1543821	1544136	AluJr	+	SINE/Alu	AluJr	9.12143	2.7559	5.93867	3.30978	0.0881056	No	-6660	ENSG00000197530	MIB2	Intergenic	14.8549	2.67111	8.76299	5.5613	0.000133929	Yes	0.591463	0.715282	0.653373	-1.20934	0.204143	No
chr1:15438393-15438518:MamTip2b	chr1	15438393	15438518	MamTip2b	-	DNA/hAT-Tip100	MamTip2b	1.40033	0.52723	0.963782	2.65602	0.00486584	Yes	0	ENSG00000189337	KAZN	Intronic	4.39549	1.17303	2.78426	3.74714	0.0106886	Yes	0.560789	0.770854	0.665822	-1.37459	0.102343	No
chr1:15438573-15438794:MIR	chr1	15438573	15438794	MIR	+	SINE/MIR	MIR	2.47963	0.679152	1.57939	3.65108	0.0161991	Yes	0	ENSG00000189337	KAZN	Intronic	0.633369	1.08618	0.859775	-1.71492	0.0952777	No	5.01767	1.67638	3.34703	2.99316	0.0438674	Yes
chr1:15439259-15439445:MER5A	chr1	15439259	15439445	MER5A	+	DNA/hAT-Charlie	MER5A	1.61202	0.854396	1.23321	1.88674	0.257804	No	0	ENSG00000189337	KAZN	Intronic	0.800378	1.31143	1.0559	-1.63851	0.136395	No	3.52988	1.41068	2.47028	2.50226	0.102343	No
chr1:15439708-15439968:MER106B	chr1	15439708	15439968	MER106B	+	DNA/hAT-Charlie	MER106B	1.78492	0.694472	1.2397	2.57018	0.0248021	Yes	0	ENSG00000189337	KAZN	Intronic	0.609511	1.51547	1.06249	-2.48637	0.0046039	Yes	4.61789	1.58871	3.1033	2.90669	0.043258	Yes
chr1:15440372-15440556:MIRb	chr1	15440372	15440556	MIRb	-	SINE/MIR	MIRb	1.18128	0.668447	0.924864	1.7672	0.166793	No	0	ENSG00000189337	KAZN	Intronic	1.929	1.03216	1.48058	1.86889	0.154398	No	0.612643	1.17443	0.893537	-1.91699	0.0576755	No
chr1:15440786-15440883:MIR	chr1	15440786	15440883	MIR	-	SINE/MIR	MIR	0.897406	0.463959	0.680682	1.93424	0.0231658	No	0	ENSG00000189337	KAZN	Intronic	1.47705	0.785766	1.13141	1.87976	0.118714	No	0.866672	1.19392	1.0303	-1.37759	0.330334	No
chr1:154553099-154553381:AluSq2	chr1	154553099	154553381	AluSq2	+	SINE/Alu	AluSq2	27.8479	25.2094	26.5287	1.10467	0.812691	No	598	ENSG00000160716	CHRNB2	afterGene	38.9345	24.7136	31.824	1.57543	0.0952777	No	0.771234	1.06918	0.920208	-1.38633	0.275103	No
chr1:154558936-154559370:L2b	chr1	154558936	154559370	L2b	-	LINE/L2	L2b	12.4442	37.2935	24.8688	-2.99685	0.00610522	Yes	0	ENSG00000160710	ADAR	Intronic	11.7778	40.5324	26.1551	-3.44143	0.000189732	Yes	15.8421	45.3145	30.5783	-2.86038	5.1575e-05	Yes
chr1:154559440-154560030:L1MB7	chr1	154559440	154560030	L1MB7	-	LINE/L1	L1MB7	7.20666	19.4515	13.3291	-2.6991	0.0232736	Yes	0	ENSG00000160710	ADAR	Intronic	14.6216	38.1751	26.3984	-2.61086	0.00381596	Yes	11.6002	29.7474	20.6738	-2.56439	0.00132297	Yes
chr1:154643044-154651788:HERV9NC-int	chr1	154643044	154651788	LTR12C|HERV9NC-int|HERV9NC-int|LTR12C	+	LTR/ERV1	HERV9NC-int	9.83269	3.46922	6.65096	2.83427	0.0840137	No	18144	ENSG00000143603	KCNN3	Intergenic	35.6827	11.4923	23.5875	3.10492	0.00110991	Yes	26.5524	4.69018	15.6213	5.66126	6.6019e-06	Yes
chr1:155104229-155104708:L2b	chr1	155104229	155104708	L2b	-	LINE/L2	L2b	5.86168	0.88296	3.37232	6.63867	0.00638787	Yes	0	ENSG00000169242	EFNA1	Intronic	0.569616	1.033	0.801306	-1.81349	0.0342023	No	14.3204	8.13134	11.2259	1.76114	0.122047	No
chr1:155155390-155155685:AluY	chr1	155155390	155155685	AluY	-	SINE/Alu	AluY	2.11357	2.19596	2.15477	-1.03898	0.957953	No	0	ENSG00000273088	RP11-201K10.3	Intronic	0.536393	0.640152	0.588272	-1.19344	0.0952777	No	8.38259	20.712	14.5473	-2.47084	0.0055337	Yes
chr1:155201062-155201338:L2c	chr1	155201062	155201338	L2c	-	LINE/L2	L2c	107.795	21.7558	64.7754	4.95478	5.23733e-06	Yes	2906	ENSG00000177628	GBA	afterGene	192.683	41.4592	117.071	4.64753	2.30883e-10	Yes	0.638901	0.697057	0.667979	-1.09103	0.580421	No
chr1:155201407-155201593:MIR3	chr1	155201407	155201593	MIR3	+	SINE/MIR	MIR3	53.7941	11.3432	32.5687	4.7424	7.26487e-05	Yes	2651	ENSG00000177628	GBA	afterGene	0.600283	0.728387	0.664335	-1.21341	0.229165	No	103.787	31.617	67.7021	3.28263	4.2967e-07	Yes
chr1:155540093-155540669:MER44D	chr1	155540093	155540669	MER44D	+	DNA/TcMar-Tigger	MER44D	6.7382	2.6474	4.6928	2.54521	0.111453	No	-7496	ENSG00000116539	ASH1L	Intergenic	20.9611	31.1182	26.0396	-1.48457	0.168841	No	0.536704	0.690137	0.61342	-1.28588	0.102343	No
chr1:155702829-155703347:L1MC4a	chr1	155702829	155703347	L1MC4a	-	LINE/L1	L1MC4a	4.12879	1.82596	2.97738	2.26116	0.226476	No	0	ENSG00000125459	MSTO1	Intronic	0.55343	1.39065	0.972039	-2.51278	0.00857044	Yes	15.4562	28.4368	21.9465	-1.83983	0.0353014	No
chr1:155720557-155720854:AluSx1	chr1	155720557	155720854	AluSx1	-	SINE/Alu	AluSx1	6.22076	6.47238	6.34657	-1.04045	0.957163	No	0	ENSG00000116580	GON4L	Intronic	0.850039	0.899614	0.874826	-1.05832	0.85573	No	13.7612	38.3288	26.045	-2.78528	0.000230876	Yes
chr1:155720916-155721057:MIRb	chr1	155720916	155721057	MIRb	-	SINE/MIR	MIRb	10.9687	3.95672	7.46273	2.77218	0.105867	No	0	ENSG00000116580	GON4L	Intronic	0.714409	1.14381	0.929111	-1.60106	0.123412	No	34.1178	58.2559	46.1869	-1.7075	0.0725937	No
chr1:155721059-155721359:AluSx1	chr1	155721059	155721359	AluSx1	+	SINE/Alu	AluSx1	8.29401	4.61506	6.45454	1.79716	0.380792	No	0	ENSG00000116580	GON4L	Intronic	26.1379	63.3711	44.7545	-2.42449	0.00238444	Yes	0.99675	1.34726	1.17201	-1.35166	0.415222	No
chr1:156001042-156001259:MIR	chr1	156001042	156001259	MIR	-	SINE/MIR	MIR	3.55635	10.7181	7.13721	-3.01378	0.0315775	Yes	3834	ENSG00000160803	UBQLN4	afterGene	14.0454	18.3223	16.1838	-1.30451	0.300505	No	0.544896	0.640414	0.592655	-1.1753	0.135017	No
chr1:156070539-156070778:L2b	chr1	156070539	156070778	L2b	-	LINE/L2	L2b	1.24676	1.49388	1.37032	-1.19821	0.819746	No	0	ENSG00000160789	LMNA	Intronic	0.544596	0.689448	0.617022	-1.26598	0.0952777	No	0.648338	5.02075	2.83454	-7.74402	3.38919e-06	Yes
chr1:156071469-156071760:L2b	chr1	156071469	156071760	L2b	-	LINE/L2	L2b	0.687244	1.62814	1.15769	-2.36909	0.12118	No	0	ENSG00000160789	LMNA	Intronic	0.592002	0.667769	0.629886	-1.12799	0.375194	No	0.800447	4.09031	2.44538	-5.11004	6.05829e-05	Yes
chr1:156081926-156082181:AluJr	chr1	156081926	156082181	AluJr	+	SINE/Alu	AluJr	0.895028	3.5041	2.19956	-3.91507	0.0827667	No	0	ENSG00000160789	LMNA	Intronic	1.84945	43.957	22.9032	-23.7676	1.89027e-17	Yes	0.544896	0.642394	0.593645	-1.17893	0.131915	No
chr1:156143016-156143618:L2	chr1	156143016	156143618	L2	-	LINE/L2	L2	2.13614	1.59631	1.86623	1.33818	0.713038	No	0	ENSG00000196189	SEMA4A	Intronic	0.536393	0.692636	0.614514	-1.29128	0.0952777	No	9.08727	9.4967	9.29198	-1.04505	0.920219	No
chr1:156144027-156144451:L2a	chr1	156144027	156144451	L2a	-	LINE/L2	L2a	2.645	1.46571	2.05535	1.80459	0.46175	No	0	ENSG00000196189	SEMA4A	Intronic	0.536393	0.679639	0.608016	-1.26706	0.0952777	No	18.7929	20.0402	19.4166	-1.06637	0.853565	No
chr1:156379719-156380030:AluSx	chr1	156379719	156380030	AluSx	-	SINE/Alu	AluSx	6.29264	6.84621	6.56942	-1.08797	0.918561	No	0	ENSG00000125462	C1orf61	Intronic	11.2738	62.2546	36.7642	-5.52204	1.13349e-07	Yes	0.775468	0.798176	0.786822	-1.02928	0.921677	No
chr1:156380529-156380938:L2c	chr1	156380529	156380938	L2c	+	LINE/L2	L2c	37.0893	54.0265	45.5579	-1.45666	0.578899	No	0	ENSG00000125462	C1orf61	Intronic	0.834559	1.07958	0.957067	-1.29359	0.516701	No	186.906	517.383	352.145	-2.76814	1.03314e-05	Yes
chr1:156381207-156381292:MLT1N2	chr1	156381207	156381292	MLT1N2	+	LTR/ERVL-MaLR	MLT1N2	10.6863	18.3122	14.4992	-1.71362	0.495591	No	0	ENSG00000125462	C1orf61	Intronic	0.556911	0.641892	0.599401	-1.15259	0.191578	No	51.522	143.621	97.5714	-2.78756	0.00026763	Yes
chr1:156388183-156388490:AluSc	chr1	156388183	156388490	AluSc	+	SINE/Alu	AluSc	4.77282	3.54334	4.15808	1.34698	0.773668	No	0	ENSG00000125462	C1orf61	Intronic	0.536393	0.689199	0.612796	-1.28488	0.0952777	No	11.5842	30.1353	20.8597	-2.6014	0.00317779	Yes
chr1:156388491-156388625:MIRb	chr1	156388491	156388625	MIRb	+	SINE/MIR	MIRb	1.77489	2.93726	2.35608	-1.6549	0.591589	No	0	ENSG00000125462	C1orf61	Intronic	0.582982	0.696818	0.6399	-1.19526	0.223792	No	7.56385	21.9109	14.7374	-2.89679	0.0015596	Yes
chr1:156407083-156407165:MIR3	chr1	156407083	156407165	MIR3	+	SINE/MIR	MIR3	4.24934	6.45484	5.35209	-1.51902	0.451273	No	-6591	ENSG00000125462	C1orf61	Intergenic	11.1289	15.9548	13.5419	-1.43364	0.190551	No	0.553941	0.836721	0.695331	-1.51049	0.067261	No
chr1:156407553-156407669:MIRb	chr1	156407553	156407669	MIRb	+	SINE/MIR	MIRb	4.58256	11.7216	8.15208	-2.55787	0.0395265	Yes	-7061	ENSG00000125462	C1orf61	Intergenic	17.7194	21.1397	19.4295	-1.19303	0.579914	No	0.536704	0.729034	0.632869	-1.35835	0.0986768	No
chr1:156569362-156569573:MIRb	chr1	156569362	156569573	MIRb	-	SINE/MIR	MIRb	12.7231	6.80543	9.76427	1.86955	0.148962	No	0	ENSG00000160818	GPATCH4	Intronic	0.659033	0.988269	0.823651	-1.49958	0.0952777	No	18.1165	9.06044	13.5885	1.99952	0.0430963	No
chr1:156576575-156576946:MER31A	chr1	156576575	156576946	MER31A	+	LTR/ERV1	MER31A	13.0098	3.87116	8.44048	3.3607	0.0323528	Yes	-5288	ENSG00000160818	GPATCH4	Intergenic	33.7382	22.2736	28.0059	1.51471	0.097088	No	0.599167	0.642394	0.620781	-1.07215	0.575622	No
chr1:156625661-156625757:MIRc	chr1	156625661	156625757	MIRc	-	SINE/MIR	MIRc	5.53846	0.723655	3.13106	7.65346	0.00022098	Yes	0	ENSG00000132692	BCAN	Intronic	0.631143	0.640152	0.635647	-1.01427	0.921918	No	21.4475	9.16255	15.3051	2.34078	0.0306892	Yes
chr1:156626267-156626445:MIRb	chr1	156626267	156626445	MIRb	+	SINE/MIR	MIRb	1.95122	0.635293	1.29326	3.07138	0.0158577	Yes	0	ENSG00000132692	BCAN	Intronic	13.9859	4.3057	9.14581	3.24823	0.00543218	Yes	0.536704	0.678804	0.607754	-1.26477	0.102343	No
chr1:156628571-156628707:MIR3	chr1	156628571	156628707	MIR3	+	SINE/MIR	MIR3	6.56048	0.667585	3.61403	9.82719	4.43811e-05	Yes	0	ENSG00000132692	BCAN	Intronic	17.0919	4.83763	10.9648	3.53312	0.000838928	Yes	0.536704	0.64212	0.589412	-1.19642	0.102343	No
chr1:156684884-156685687:L2d2	chr1	156684884	156685687	L2d2	+	LINE/L2	L2d2	14.3464	2.71442	8.53043	5.28527	0.0105077	Yes	5997	ENSG00000143319	ISG20L2	Intergenic	0.981455	0.940201	0.960828	1.04388	0.905486	No	90.2497	34.5136	62.3817	2.6149	0.000767485	Yes
chr1:156686023-156686320:L2d2	chr1	156686023	156686320	L2d2	+	LINE/L2	L2d2	4.13127	1.39137	2.76132	2.96921	0.11609	No	5364	ENSG00000143319	ISG20L2	Intergenic	0.563151	0.65832	0.610735	-1.16899	0.173801	No	24.2991	11.3644	17.8317	2.13818	0.0421923	Yes
chr1:156715352-156715559:L2d	chr1	156715352	156715559	L2d	+	LINE/L2	L2d	0.820355	0.967171	0.893763	-1.17897	0.758123	No	0	ENSG00000143321	HDGF	Intronic	0.536393	0.647036	0.591714	-1.20627	0.0952777	No	2.94823	8.48585	5.71704	-2.87829	0.00481429	Yes
chr1:156715760-156716125:L2d	chr1	156715760	156716125	L2d	+	LINE/L2	L2d	1.0673	1.18554	1.12642	-1.11078	0.872957	No	0	ENSG00000143321	HDGF	Intronic	0.536393	0.64246	0.589426	-1.19774	0.0952777	No	2.69185	7.53451	5.11318	-2.79901	0.00307901	Yes
chr1:157002422-157003827:L2c	chr1	157002422	157003827	L2c	+	LINE/L2	L2c	5.66271	1.55499	3.60885	3.64164	0.0365598	Yes	0	ENSG00000132694	ARHGEF11	Intronic	0.536393	0.642131	0.589262	-1.19713	0.0952777	No	1.77464	2.09855	1.9366	-1.18252	0.743008	No
chr1:15816755-15817008:L1ME3G	chr1	15816755	15817008	L1ME3G	-	LINE/L1	L1ME3G	7.77081	4.38527	6.07804	1.77202	0.298958	No	0	ENSG00000215704	CELA2B	Intronic	15.0532	11.8344	13.4438	1.27199	0.399053	No	0.635983	0.640414	0.638198	-1.00697	0.964892	No
chr1:159025838-159027860:MER61-int	chr1	159025838	159027860	MER61A|MER61-int|MER61-int	-	LTR/ERV1	MER61-int	0.740408	8.68215	4.71128	-11.7262	4.34436e-05	Yes	894	ENSG00000163565	IFI16	afterGene	1.01669	22.7195	11.8681	-22.3465	2.85972e-14	Yes	0.611083	0.706448	0.658765	-1.15606	0.38185	No
chr1:159030242-159030843:L1ME1	chr1	159030242	159030843	L1ME1	-	LINE/L1	L1ME1	0.569312	8.07226	4.32079	-14.179	2.93532e-06	Yes	1432	ENSG00000163568	AIM2	afterGene	0.597643	8.58154	4.58959	-14.359	8.4183e-12	Yes	0.536704	0.640414	0.588559	-1.19324	0.102343	No
chr1:159163976-159164173:MER58A	chr1	159163976	159164173	MER58A	-	DNA/hAT-Charlie	MER58A	2.47128	3.48932	2.9803	-1.41195	0.698805	No	0	ENSG00000162706	CADM3	Intronic	0.556911	0.661196	0.609053	-1.18726	0.134006	No	6.04322	24.3373	15.1903	-4.02721	0.000479375	Yes
chr1:159164253-159164413:MIR3	chr1	159164253	159164413	MIR3	+	SINE/MIR	MIR3	1.50452	2.45105	1.97778	-1.62912	0.562628	No	0	ENSG00000162706	CADM3	Intronic	5.21146	24.3922	14.8018	-4.68049	5.69136e-05	Yes	0.602534	0.642736	0.622635	-1.06672	0.610052	No
chr1:159164964-159165133:MIRc	chr1	159164964	159165133	MIRc	+	SINE/MIR	MIRc	2.79809	3.54979	3.17394	-1.26865	0.768781	No	0	ENSG00000162706	CADM3	Intronic	8.8984	36.4618	22.6801	-4.09757	6.28838e-06	Yes	0.544896	0.642736	0.593816	-1.17956	0.130788	No
chr1:159173845-159173912:MER94B	chr1	159173845	159173912	MER94B	+	DNA/hAT-Blackjack	MER94B	17.963	16.0262	16.9946	1.12085	0.818033	No	0	ENSG00000213088	DARC	Intronic	20.6387	24.1658	22.4022	-1.1709	0.585178	No	0.560354	0.680216	0.620285	-1.21391	0.125203	No
chr1:159807154-159807613:L2a	chr1	159807154	159807613	L2a	-	LINE/L2	L2a	2.2762	1.9484	2.1123	1.16824	0.874105	No	0	ENSG00000188004	C1orf204	Intronic	13.2098	15.8414	14.5256	-1.19922	0.635603	No	0.549355	0.640414	0.594885	-1.16576	0.160281	No
chr1:159968914-159969410:LTR85c	chr1	159968914	159969410	LTR85c	-	LTR/Gypsy?	LTR85c	13.2241	0.898664	7.06139	14.7153	0.00032799	Yes	28053	ENSG00000143315	PIGM	Intergenic	19.7285	1.94685	10.8377	10.1335	4.89843e-07	Yes	0.549355	0.640414	0.594885	-1.16576	0.160281	No
chr1:160054941-160055182:MIR	chr1	160054941	160055182	MIR	-	SINE/MIR	MIR	25.3517	2.7013	14.0265	9.38502	0.000161061	Yes	0	ENSG00000162728	KCNJ9	Intronic	0.707749	0.892588	0.800169	-1.26116	0.351423	No	35.4443	3.51018	19.4772	10.0976	4.08783e-07	Yes
chr1:160056224-160056584:CR1-3_Croc	chr1	160056224	160056584	CR1-3_Croc	+	LINE/CR1	CR1-3_Croc	17.791	1.66811	9.72957	10.6654	0.000185875	Yes	0	ENSG00000162728	KCNJ9	Intronic	34.2204	4.13721	19.1788	8.27136	3.60098e-06	Yes	0.632031	0.640414	0.636222	-1.01326	0.935917	No
chr1:160056637-160057020:L3	chr1	160056637	160057020	L3	+	LINE/CR1	L3	28.8199	2.82386	15.8219	10.2059	1.6927e-05	Yes	0	ENSG00000162728	KCNJ9	Intronic	61.849	9.66618	35.7576	6.39849	9.02682e-08	Yes	0.865353	0.711253	0.788303	1.21666	0.474989	No
chr1:160064013-160064158:L2d	chr1	160064013	160064158	L2d	+	LINE/L2	L2d	39.5272	10.9622	25.2447	3.60579	0.00673449	Yes	0	ENSG00000162729	IGSF8	Intronic	20.8158	7.69823	14.257	2.70397	0.00591708	Yes	158.962	65.8967	112.429	2.4123	0.000364196	Yes
chr1:160064431-160064613:MIR3	chr1	160064431	160064613	MIR3	+	SINE/MIR	MIR3	46.3607	6.21057	26.2857	7.46481	0.0019388	Yes	0	ENSG00000162729	IGSF8	Intronic	0.539922	0.675438	0.60768	-1.25099	0.161976	No	143.518	66.5427	105.031	2.15679	0.0016166	Yes
chr1:160088506-160088691:EUTREP16	chr1	160088506	160088691	EUTREP16	-	LTR	EUTREP16	1.48383	0.50795	0.995892	2.92122	0.00231858	Yes	0	ENSG00000018625	ATP1A2	Intronic	0.731698	0.640152	0.685925	1.14301	0.381144	No	4.11501	1.1008	2.6079	3.73821	0.00968192	Yes
chr1:160088696-160089005:L1MC1	chr1	160088696	160089005	L1MC1	+	LINE/L1	L1MC1	0.950293	0.465056	0.707675	2.0434	0.0213359	Yes	0	ENSG00000018625	ATP1A2	Intronic	8.55841	1.45343	5.00592	5.88842	9.14247e-05	Yes	0.583239	0.670152	0.626695	-1.14902	0.287358	No
chr1:160095919-160096220:MER2	chr1	160095919	160096220	MER2	-	DNA/TcMar-Tigger	MER2	8.65747	1.0542	4.85583	8.21238	0.000746827	Yes	0	ENSG00000018625	ATP1A2	Intronic	0.536393	0.642131	0.589262	-1.19713	0.0952777	No	19.9076	4.0397	11.9737	4.92799	0.000879512	Yes
chr1:160101778-160102733:L2d2	chr1	160101778	160102733	L2d2	-	LINE/L2	L2d2	18.9765	2.13673	10.5566	8.8811	0.000176704	Yes	0	ENSG00000018625	ATP1A2	Intronic	0.835383	0.677337	0.75636	1.23333	0.258552	No	37.2089	7.12098	22.1649	5.22524	0.000139269	Yes
chr1:160107248-160107466:MIRb	chr1	160107248	160107466	MIRb	-	SINE/MIR	MIRb	12.7128	1.33908	7.02593	9.49369	0.00098726	Yes	0	ENSG00000018625	ATP1A2	Intronic	0.536393	0.64577	0.591081	-1.20391	0.0952777	No	19.7819	6.58865	13.1853	3.00241	0.0203779	Yes
chr1:160107644-160107948:Plat_L3	chr1	160107644	160107948	Plat_L3	+	LINE/CR1	Plat_L3	3.82292	0.939478	2.3812	4.0692	0.0216861	Yes	0	ENSG00000018625	ATP1A2	Intronic	16.0047	7.23986	11.6223	2.21064	0.0752918	No	0.661092	0.642736	0.651914	1.02856	0.852198	No
chr1:160107989-160108301:Charlie19a	chr1	160107989	160108301	Charlie19a	+	DNA/hAT-Charlie	Charlie19a	3.30049	0.859904	2.0802	3.83821	0.028909	Yes	0	ENSG00000018625	ATP1A2	Intronic	16.4085	10.2406	13.3246	1.6023	0.216263	No	0.544896	0.643288	0.594092	-1.18057	0.129492	No
chr1:160108351-160108630:AluJb	chr1	160108351	160108630	AluJb	+	SINE/Alu	AluJb	2.97204	0.761942	1.86699	3.90061	0.0220339	Yes	0	ENSG00000018625	ATP1A2	Intronic	7.51771	7.20569	7.3617	1.0433	0.936961	No	0.536704	0.640414	0.588559	-1.19324	0.102343	No
chr1:160108698-160108901:MIR	chr1	160108698	160108901	MIR	-	SINE/MIR	MIR	5.29051	0.839211	3.06486	6.30415	0.00491106	Yes	0	ENSG00000018625	ATP1A2	Intronic	0.536393	0.640152	0.588272	-1.19344	0.0952777	No	20.5139	9.77576	15.1449	2.09845	0.0970164	No
chr1:160108972-160109084:L2d2	chr1	160108972	160109084	L2d2	-	LINE/L2	L2d2	2.17326	0.854741	1.514	2.54259	0.131171	No	0	ENSG00000018625	ATP1A2	Intronic	0.536393	0.640152	0.588272	-1.19344	0.0952777	No	17.2343	6.06432	11.6493	2.84191	0.050212	No
chr1:160110019-160110195:MIR3	chr1	160110019	160110195	MIR3	-	SINE/MIR	MIR3	13.7665	1.30847	7.53749	10.5211	0.0031225	Yes	0	ENSG00000018625	ATP1A2	Intronic	0.553583	0.640152	0.596867	-1.15638	0.179605	No	70.1424	25.6867	47.9146	2.73069	0.0136915	Yes
chr1:160110637-160110935:AluSc8	chr1	160110637	160110935	AluSc8	-	SINE/Alu	AluSc8	13.5059	2.21018	7.85804	6.11076	0.017178	Yes	0	ENSG00000018625	ATP1A2	Intronic	0.583067	0.641892	0.61248	-1.10089	0.415115	No	20.2224	7.95807	14.0902	2.54111	0.0369167	Yes
chr1:160114235-160114642:L2a	chr1	160114235	160114642	L2a	+	LINE/L2	L2a	5.83235	1.1151	3.47373	5.23032	0.00771862	Yes	855	ENSG00000018625	ATP1A2	afterGene	35.8045	9.12903	22.4668	3.92205	0.00275912	Yes	0.536704	0.688885	0.612794	-1.28355	0.102343	No
chr1:160191805-160192071:L1MC4	chr1	160191805	160192071	L1MC4	-	LINE/L1	L1MC4	13.7074	8.63876	11.1731	1.58673	0.42055	No	0	ENSG00000132716	DCAF8	Intronic	19.9528	61.5099	40.7313	-3.08278	0.000607847	Yes	2.18519	1.40014	1.79267	1.56069	0.314031	No
chr1:160245937-160246479:ERVL-E-int	chr1	160245937	160246479	ERVL-E-int	-	LTR/ERVL	ERVL-E-int	20.9856	8.39895	14.6923	2.4986	0.0124272	Yes	0	ENSG00000132716	DCAF8	Intronic	44.3403	12.7743	28.5573	3.47107	9.77778e-06	Yes	0.593892	0.685184	0.639538	-1.15372	0.32031	No
chr1:160258579-160258638:MIR	chr1	160258579	160258638	MIR	+	SINE/MIR	MIR	12.1553	3.75303	7.95415	3.23879	0.0414114	Yes	426	ENSG00000122218	COPA	afterGene	0.661854	0.640152	0.651003	1.0339	0.817024	No	39.0504	14.4449	26.7476	2.7034	0.00234908	Yes
chr1:160258755-160258939:AluSg7	chr1	160258755	160258939	AluSg7	-	SINE/Alu	AluSg7	31.6928	15.3772	23.535	2.06103	0.0291298	Yes	125	ENSG00000122218	COPA	afterGene	58.9499	27.3469	43.1484	2.15564	0.00531919	Yes	0.667969	0.691717	0.679843	-1.03555	0.844749	No
chr1:160391096-160391569:MLT1E	chr1	160391096	160391569	MLT1E	-	LTR/ERVL-MaLR	MLT1E	0.823062	5.12355	2.9733	-6.22498	0.0145856	Yes	0	ENSG00000162738	VANGL2	Intronic	0.592002	0.665208	0.628605	-1.12366	0.367357	No	1.53101	25.8958	13.7134	-16.9142	1.23954e-10	Yes
chr1:160392996-160393556:L1ME5	chr1	160392996	160393556	L1ME5	-	LINE/L1	L1ME5	1.0818	6.86964	3.97572	-6.35021	0.0034235	Yes	0	ENSG00000162738	VANGL2	Intronic	0.536393	0.640152	0.588272	-1.19344	0.0952777	No	2.20251	45.9163	24.0594	-20.8472	1.11928e-11	Yes
chr1:160998735-161000000:SVA_B	chr1	160998735	161000000	SVA_B	+	Retroposon/SVA	SVA_B	1.05839	1.268	1.16319	-1.19805	0.79026	No	0	ENSG00000270149	RP11-544M22.13	Intronic	0.665684	0.728042	0.696863	-1.09367	0.649491	No	3.36672	11.8082	7.58748	-3.50734	0.000343791	Yes
chr1:161150121-161150744:L2	chr1	161150121	161150744	L2	-	LINE/L2	L2	2.95486	5.36527	4.16007	-1.81574	0.397507	No	2319	ENSG00000143224	PPOX	afterGene	0.685499	0.739885	0.712692	-1.07934	0.686366	No	2.83501	12.0104	7.4227	-4.23646	0.000551808	Yes
chr1:161249371-161249500:MIRb	chr1	161249371	161249500	MIRb	+	SINE/MIR	MIRb	2.38419	0.791075	1.58763	3.01386	0.0230942	Yes	0	ENSG00000248485	PCP4L1	Intronic	0.536393	0.673273	0.604833	-1.25519	0.0952777	No	21.0159	6.95236	13.9841	3.02285	0.0046622	Yes
chr1:161256129-161256364:L1MB3	chr1	161256129	161256364	L1MB3	-	LINE/L1	L1MB3	7.83673	0.555173	4.19595	14.1158	9.6917e-07	Yes	890	ENSG00000248485	PCP4L1	afterGene	0.999216	0.859218	0.929217	1.16294	0.693747	No	15.5854	1.30011	8.44275	11.9878	2.13185e-07	Yes
chr1:161257057-161257213:FRAM	chr1	161257057	161257213	FRAM	+	SINE/Alu	FRAM	12.074	0.582066	6.32803	20.7433	6.03791e-07	Yes	1818	ENSG00000248485	PCP4L1	afterGene	13.2113	1.21914	7.2152	10.8366	3.6914e-07	Yes	0.643245	0.813009	0.728127	-1.26392	0.292131	No
chr1:161336450-161336558:MER33	chr1	161336450	161336558	MER33	+	DNA/hAT-Charlie	MER33	28.9057	10.5087	19.7072	2.75066	0.00340823	Yes	0	ENSG00000188931	C1orf192	Intronic	30.9385	18.2329	24.5857	1.69685	0.0952777	No	0.544896	0.644141	0.594518	-1.18214	0.125203	No
chr1:161336559-161336863:AluJr	chr1	161336559	161336863	AluJr	-	SINE/Alu	AluJr	65.9729	19.6054	42.7891	3.36505	5.91472e-05	Yes	0	ENSG00000188931	C1orf192	Intronic	0.56036	0.642131	0.601245	-1.14593	0.215724	No	62.8109	31.2847	47.0478	2.00772	0.0123941	Yes
chr1:161337074-161337433:MER58D	chr1	161337074	161337433	MER58D	+	DNA/hAT-Charlie	MER58D	67.2167	23.6381	45.4274	2.84357	0.00252502	Yes	0	ENSG00000188931	C1orf192	Intronic	96.6876	40.3771	68.5323	2.39462	5.84209e-05	Yes	0.641285	0.645729	0.643507	-1.00693	0.968398	No
chr1:161338739-161339043:AluSx3	chr1	161338739	161339043	AluSx3	+	SINE/Alu	AluSx3	13.6914	5.08157	9.38647	2.69432	0.0138947	Yes	-1076	ENSG00000188931	C1orf192	Intergenic	32.3365	10.6753	21.5059	3.02909	0.00186058	Yes	0.544896	0.640414	0.592655	-1.1753	0.135017	No
chr1:161339487-161339605:L1ME4b	chr1	161339487	161339605	L1ME4b	-	LINE/L1	L1ME4b	53.9187	15.4434	34.6811	3.49138	0.000564016	Yes	-1824	ENSG00000188931	C1orf192	Intergenic	0.536393	0.640152	0.588272	-1.19344	0.0952777	No	97.7576	28.9998	63.3787	3.37097	3.29588e-06	Yes
chr1:161339674-161339902:L1ME4b	chr1	161339674	161339902	L1ME4b	-	LINE/L1	L1ME4b	26.3192	4.89021	15.6047	5.382	0.00144586	Yes	-2011	ENSG00000188931	C1orf192	Intergenic	0.536393	0.640152	0.588272	-1.19344	0.0952777	No	46.4656	17.0978	31.7817	2.71764	0.0012088	Yes
chr1:161340406-161340592:MIR	chr1	161340406	161340592	MIR	-	SINE/MIR	MIR	13.4808	4.46042	8.97061	3.02232	0.0142692	Yes	-2743	ENSG00000188931	C1orf192	Intergenic	0.544596	0.640152	0.592374	-1.17546	0.127035	No	16.1211	14.7377	15.4294	1.09387	0.760442	No
chr1:161401314-161403689:HERVL-int	chr1	161401314	161403689	MLT2A1|HERVL-int	-	LTR/ERVL	HERVL-int	13.9368	10.0608	11.9988	1.38525	0.51743	No	-63651	ENSG00000188931	C1orf192	Intergenic	2.51177	2.27485	2.39331	1.10415	0.83634	No	16.3915	16.4328	16.4122	-1.00252	0.993293	No
chr1:161700764-161701621:MER4D0	chr1	161700764	161701621	MER4D0	+	LTR/ERV1	MER4D0	26.934	4.01993	15.477	6.70013	6.98262e-05	Yes	2832	ENSG00000162746	FCRLB	afterGene	56.0359	3.59876	29.8173	15.5709	4.75239e-09	Yes	0.544896	0.640414	0.592655	-1.1753	0.135017	No
chr1:161724239-161724596:THE1D	chr1	161724239	161724596	THE1D	-	LTR/ERVL-MaLR	THE1D	2.16156	4.05097	3.10626	-1.8741	0.403421	No	0	ENSG00000081721	DUSP12	Intronic	0.544596	0.82845	0.686523	-1.52122	0.0512929	No	10.8226	39.2332	25.0279	-3.62513	0.00030609	Yes
chr1:161726312-161726527:L2d	chr1	161726312	161726527	L2d	+	LINE/L2	L2d	1.99663	1.88646	1.94154	1.0584	0.94514	No	0	ENSG00000081721	DUSP12	Intronic	8.05461	18.8134	13.434	-2.33573	0.078592	No	0.553941	0.659803	0.606872	-1.19111	0.141146	No
chr1:162418037-162420506:L1PA4	chr1	162418037	162420506	L1PA4	+	LINE/L1	L1PA4	20.8202	0.5064	10.6633	41.1141	8.8827e-09	Yes	-36110	ENSG00000198574	SH2D1B	Intergenic	0.544596	0.644696	0.594646	-1.18381	0.117457	No	10.8006	0.682566	5.74157	15.8235	5.66868e-10	Yes
chr1:162420620-162421468:SVA_A	chr1	162420620	162421468	SVA_A	-	Retroposon/SVA	SVA_A	33.5786	0.460523	17.0196	72.9141	6.74665e-10	Yes	-38693	ENSG00000198574	SH2D1B	Intergenic	29.8655	0.660107	15.2628	45.2434	4.47582e-17	Yes	0.536704	0.640414	0.588559	-1.19324	0.102343	No
chr1:16264609-16264910:AluSz	chr1	16264609	16264910	AluSz	-	SINE/Alu	AluSz	2.83449	2.98905	2.91177	-1.05453	0.960127	No	0	ENSG00000065526	SPEN	Intronic	0.548921	0.640152	0.594536	-1.1662	0.151277	No	8.41312	45.8695	27.1413	-5.45214	1.03627e-08	Yes
chr1:162776760-162781169:L1PA5	chr1	162776760	162781169	L1PA5	-	LINE/L1	L1PA5	2.89453	1.25487	2.0747	2.30664	0.207176	No	0	ENSG00000132196	HSD17B7	Intronic	0.596811	0.687446	0.642128	-1.15187	0.305521	No	22.8132	48.2905	35.5518	-2.11678	0.00848211	Yes
chr1:16336587-16337173:LTR71B	chr1	16336587	16337173	LTR71B	-	LTR/ERV1	LTR71B	7.2537	2.79825	5.02598	2.59223	0.0631728	No	1286	ENSG00000183888	C1orf64	afterGene	0.536393	0.654642	0.595518	-1.22045	0.0952777	No	12.775	4.47834	8.62668	2.85263	0.00971332	Yes
chr1:16390328-16391915:L2	chr1	16390328	16391915	L2	+	LINE/L2	L2	2.31293	1.12303	1.71798	2.05954	0.244383	No	0	ENSG00000185519	FAM131C	Intronic	0.782293	0.641892	0.712093	1.21873	0.370673	No	4.1096	1.54648	2.82804	2.65739	0.086591	No
chr1:164576431-164577072:L2c	chr1	164576431	164577072	L2c	-	LINE/L2	L2c	2.88476	1.57829	2.23153	1.82777	0.420649	No	0	ENSG00000185630	PBX1	Intronic	0.635609	0.668134	0.651872	-1.05117	0.747538	No	2.69507	2.31079	2.50293	1.1663	0.77331	No
chr1:164854664-164854778:MIR3	chr1	164854664	164854778	MIR3	+	SINE/MIR	MIR3	5.74835	31.1801	18.4642	-5.42418	2.84498e-05	Yes	0	ENSG00000185630	PBX1	Intronic	6.24891	22.9379	14.5934	-3.67071	7.46974e-07	Yes	0.536704	0.653728	0.595216	-1.21804	0.102343	No
chr1:164854917-164855285:L2a	chr1	164854917	164855285	L2a	+	LINE/L2	L2a	6.21665	29.7128	17.9647	-4.77955	0.000217606	Yes	0	ENSG00000185630	PBX1	Intronic	17.5658	55.3579	36.4619	-3.15146	4.27397e-06	Yes	0.536704	0.640414	0.588559	-1.19324	0.102343	No
chr1:16555169-16555336:MIR	chr1	16555169	16555336	MIR	-	SINE/MIR	MIR	29.1539	12.3518	20.7528	2.36029	0.0160112	Yes	33	ENSG00000204377	C1orf134	afterGene	34.9734	10.6421	22.8078	3.28632	3.92654e-05	Yes	0.785725	0.743703	0.764714	1.0565	0.803626	No
chr1:16557543-16557846:AluSx1	chr1	16557543	16557846	AluSx1	+	SINE/Alu	AluSx1	43.4744	16.5548	30.0146	2.62609	0.0047872	Yes	350	ENSG00000132881	RSG1	afterGene	0.536393	0.640152	0.588272	-1.19344	0.0952777	No	26.4763	15.2562	20.8662	1.73545	0.102343	No
chr1:165625106-165625357:AluJo	chr1	165625106	165625357	AluJo	+	SINE/Alu	AluJo	35.9364	23.6105	29.7734	1.52206	0.287604	No	0	ENSG00000143198	MGST3	Intronic	58.2081	26.0451	42.1266	2.2349	0.000849797	Yes	0.619599	0.640414	0.630007	-1.03359	0.811802	No
chr1:165690001-165690642:Tigger13a	chr1	165690001	165690642	Tigger13a	-	DNA/TcMar-Tigger	Tigger13a	14.3416	8.27037	11.306	1.73409	0.250205	No	5391	ENSG00000143183	TMCO1	Intergenic	35.5173	17.1673	26.3423	2.06889	0.019675	Yes	0.536704	0.640414	0.588559	-1.19324	0.102343	No
chr1:165692570-165693606:L1MC5	chr1	165692570	165693606	L1MC5	+	LINE/L1	L1MC5	35.1453	19.248	27.1967	1.82592	0.243872	No	2427	ENSG00000143183	TMCO1	afterGene	0.672631	0.651072	0.661852	1.03311	0.844725	No	24.5182	23.5716	24.0449	1.04016	0.908879	No
chr1:165693901-165694215:L1MC5	chr1	165693901	165694215	L1MC5	+	LINE/L1	L1MC5	18.1303	21.5748	19.8525	-1.18999	0.712903	No	1818	ENSG00000143183	TMCO1	afterGene	0.536393	0.656127	0.59626	-1.22322	0.0952777	No	17.4981	14.6231	16.0606	1.19661	0.516635	No
chr1:165695690-165695901:MIR	chr1	165695690	165695901	MIR	+	SINE/MIR	MIR	11.9121	18.9916	15.4518	-1.59431	0.223636	No	132	ENSG00000143183	TMCO1	afterGene	0.544596	0.642131	0.593363	-1.1791	0.124364	No	7.08497	10.0137	8.54936	-1.41338	0.371855	No
chr1:1660829-1661117:AluSg	chr1	1660829	1661117	AluSg	-	SINE/Alu	AluSg	63.6567	164.092	113.874	-2.57776	0.104245	No	0	ENSG00000215790	SLC35E2	Intronic	23.8137	207.65	115.732	-8.71977	9.13985e-08	Yes	0.673471	1.00702	0.840244	-1.49526	0.14167	No
chr1:1661261-1661542:AluJo	chr1	1661261	1661542	AluJo	+	SINE/Alu	AluJo	109.133	198.607	153.87	-1.81987	0.136382	No	0	ENSG00000215790	SLC35E2	Intronic	1.01376	1.48889	1.25132	-1.46869	0.331351	No	78.1364	312.003	195.07	-3.99306	9.96804e-10	Yes
chr1:166260673-166260904:L2d2	chr1	166260673	166260904	L2d2	-	LINE/L2	L2d2	3.11327	1.8315	2.47238	1.69984	0.456706	No	-124468	ENSG00000188859	FAM78B	Intergenic	0.625718	0.647221	0.63647	-1.03436	0.806289	No	4.70782	3.17466	3.94124	1.48294	0.375454	No
chr1:166262973-166263405:L1PA10	chr1	166262973	166263405	L1PA10	+	LINE/L1	L1PA10	3.01581	3.10955	3.06268	-1.03108	0.962346	No	-126768	ENSG00000188859	FAM78B	Intergenic	9.02844	4.44605	6.73724	2.03067	0.0952777	No	0.536704	0.640414	0.588559	-1.19324	0.102343	No
chr1:166309614-166310462:L1ME4b	chr1	166309614	166310462	L1ME4b	-	LINE/L1	L1ME4b	4.89137	2.98177	3.93657	1.64042	0.472521	No	-173409	ENSG00000188859	FAM78B	Intergenic	0.583067	0.640152	0.61161	-1.0979	0.428896	No	14.0428	6.62915	10.336	2.11834	0.102343	No
chr1:1665337-1665506:MER3	chr1	1665337	1665506	MER3	-	DNA/hAT-Charlie	MER3	4.42776	6.26845	5.34811	-1.41572	0.699108	No	0	ENSG00000215790	SLC35E2	Intronic	6.22511	31.3182	18.7717	-5.03095	9.16962e-06	Yes	0.659731	0.821105	0.740418	-1.24461	0.344312	No
chr1:166858742-166859396:L1ME4b	chr1	166858742	166859396	L1ME4b	+	LINE/L1	L1ME4b	2.14543	0.55566	1.35055	3.86106	0.000810352	Yes	-13179	ENSG00000152382	TADA1	Intergenic	0.583067	0.686346	0.634706	-1.17713	0.235175	No	10.8437	1.58699	6.21534	6.83287	5.45331e-05	Yes
chr1:166863379-166864135:L1MC1	chr1	166863379	166864135	L1MC1	-	LINE/L1	L1MC1	18.2282	1.0189	9.62355	17.8901	1.70867e-05	Yes	-17816	ENSG00000152382	TADA1	Intergenic	31.4186	2.1188	16.7687	14.8285	3.95089e-08	Yes	0.604152	0.640414	0.622283	-1.06002	0.648958	No
chr1:166866270-166866539:L2b	chr1	166866270	166866539	L2b	-	LINE/L2	L2b	12.0711	0.726851	6.39899	16.6074	1.18921e-05	Yes	15905	ENSG00000143195	ILDR2	Intergenic	32.5045	5.75619	19.1303	5.64688	1.84018e-05	Yes	0.635983	0.642994	0.639488	-1.01102	0.943414	No
chr1:166866544-166867298:MER21C	chr1	166866544	166867298	MER21C	+	LTR/ERVL	MER21C	33.2607	1.78549	17.5231	18.6283	1.53808e-05	Yes	15146	ENSG00000143195	ILDR2	Intergenic	0.635609	0.642733	0.639171	-1.01121	0.94116	No	54.9082	11.2456	33.0769	4.88264	0.000225353	Yes
chr1:166867388-166867533:L2b	chr1	166867388	166867533	L2b	-	LINE/L2	L2b	14.6221	0.716178	7.66916	20.4169	1.66008e-06	Yes	14911	ENSG00000143195	ILDR2	Intergenic	13.6025	3.23211	8.41732	4.20855	0.0015052	Yes	0.536704	0.640414	0.588559	-1.19324	0.102343	No
chr1:166869783-166869942:MIR	chr1	166869783	166869942	MIR	-	SINE/MIR	MIR	6.21796	0.765068	3.49151	8.12733	0.000184521	Yes	12502	ENSG00000143195	ILDR2	Intergenic	10.3372	1.95798	6.14758	5.27951	0.000235324	Yes	0.536704	0.642394	0.589549	-1.19693	0.102343	No
chr1:166872876-166873391:L2a	chr1	166872876	166873391	L2a	+	LINE/L2	L2a	14.6516	1.10617	7.87889	13.2454	3.3171e-05	Yes	9053	ENSG00000143195	ILDR2	Intergenic	0.544596	0.640152	0.592374	-1.17546	0.127035	No	11.9764	2.43315	7.20476	4.92216	0.00043743	Yes
chr1:166877377-166877743:MLT1A	chr1	166877377	166877743	MLT1A	-	LTR/ERVL-MaLR	MLT1A	44.8517	5.30641	25.0791	8.45237	0.000293167	Yes	4701	ENSG00000143195	ILDR2	afterGene	87.3774	19.3791	53.3783	4.50885	2.15229e-06	Yes	0.544896	0.690137	0.617516	-1.26655	0.113075	No
chr1:166878212-166878758:MLT1K	chr1	166878212	166878758	MLT1K	+	LTR/ERVL-MaLR	MLT1K	66.8496	10.0124	38.431	6.67669	3.33193e-05	Yes	3686	ENSG00000143195	ILDR2	afterGene	0.892274	0.80758	0.849927	1.10487	0.690554	No	107.554	27.8712	67.7127	3.85898	2.00114e-05	Yes
chr1:166880299-166880693:LTR78	chr1	166880299	166880693	LTR78	-	LTR/ERV1	LTR78	19.9424	2.48525	11.2138	8.0243	0.000248305	Yes	1751	ENSG00000143195	ILDR2	afterGene	15.5903	6.79358	11.1919	2.29486	0.0854163	No	0.536704	0.642736	0.58972	-1.19756	0.102343	No
chr1:166880711-166881770:L1MEd	chr1	166880711	166881770	L1MEd	+	LINE/L1	L1MEd	6.89204	1.32866	4.11035	5.1872	0.0105423	Yes	674	ENSG00000143195	ILDR2	afterGene	0.536393	0.642131	0.589262	-1.19713	0.0952777	No	7.78185	6.53889	7.16037	1.19009	0.69529	No
chr1:167677250-167677545:MLT1K	chr1	167677250	167677545	MLT1K	-	LTR/ERVL-MaLR	MLT1K	27.4746	5.87341	16.674	4.67779	0.00171595	Yes	1765	ENSG00000198771	RCSD1	afterGene	0.536393	0.640152	0.588272	-1.19344	0.0952777	No	23.4348	9.03997	16.2374	2.59236	0.00622243	Yes
chr1:167740240-167741395:SVA_A	chr1	167740240	167741395	SVA_A	-	Retroposon/SVA	SVA_A	0.68871	1.2555	0.972106	-1.82298	0.251231	No	0	ENSG00000197965	MPZL1	Intronic	0.544596	0.642131	0.593363	-1.1791	0.124364	No	1.02455	4.1539	2.58922	-4.05438	0.00105475	Yes
chr1:16784815-16785110:AluJb	chr1	16784815	16785110	AluJb	+	SINE/Alu	AluJb	2.43162	3.86614	3.14888	-1.58995	0.560106	No	0	ENSG00000157191	NECAP2	Intronic	0.848267	1.81344	1.33085	-2.13781	0.0779046	No	9.08379	36.7581	22.921	-4.04656	4.01086e-06	Yes
chr1:16790569-16790696:MIR	chr1	16790569	16790696	MIR	-	SINE/MIR	MIR	2.41524	1.37393	1.89459	1.75791	0.400807	No	3997	ENSG00000157191	NECAP2	afterGene	5.18967	8.91341	7.05154	-1.71753	0.0952777	No	0.60315	0.884153	0.743652	-1.46589	0.102343	No
chr1:16791082-16791393:AluSq2	chr1	16791082	16791393	AluSq2	-	SINE/Alu	AluSq2	2.82011	1.03117	1.92564	2.73485	0.108536	No	4510	ENSG00000157191	NECAP2	afterGene	2.94679	5.93032	4.43855	-2.01247	0.0952777	No	0.621476	0.849532	0.735504	-1.36696	0.107991	No
chr1:16791394-16791832:MLT1F2	chr1	16791394	16791832	MLT1F2	-	LTR/ERVL-MaLR	MLT1F2	19.4743	5.4212	12.4477	3.59225	0.0672629	No	4822	ENSG00000157191	NECAP2	afterGene	60.9406	58.9275	59.9341	1.03416	0.890958	No	0.670223	1.46167	1.06594	-2.18087	0.0419274	Yes
chr1:16791833-16792111:AluSc	chr1	16791833	16792111	AluSc	+	SINE/Alu	AluSc	2.90557	1.70805	2.30681	1.7011	0.467715	No	5261	ENSG00000157191	NECAP2	Intergenic	0.556911	0.827284	0.692097	-1.48549	0.0952777	No	12.5007	18.5776	15.5392	-1.48613	0.144536	No
chr1:16792121-16792531:MLT1C2	chr1	16792121	16792531	MLT1C2	-	LTR/ERVL-MaLR	MLT1C2	10.6318	4.16278	7.39731	2.55402	0.234378	No	5549	ENSG00000157191	NECAP2	Intergenic	49.6112	59.8626	54.7369	-1.20663	0.380434	No	0.862984	1.39948	1.13123	-1.62167	0.213843	No
chr1:16793464-16793677:AluJo	chr1	16793464	16793677	AluJo	+	SINE/Alu	AluJo	1.81876	2.28935	2.05405	-1.25874	0.781641	No	6892	ENSG00000157191	NECAP2	Intergenic	0.639273	0.822581	0.730927	-1.28675	0.274768	No	13.4549	14.8395	14.1472	-1.10291	0.770109	No
chr1:16796530-16796863:MLT2B4	chr1	16796530	16796863	MLT2B4	+	LTR/ERVL	MLT2B4	6.57071	3.73943	5.15507	1.75714	0.495453	No	9958	ENSG00000157191	NECAP2	Intergenic	0.847309	2.32324	1.58528	-2.74191	0.0251238	Yes	43.4146	66.7102	55.0624	-1.53658	0.102343	No
chr1:16797194-16797335:L1MD1	chr1	16797194	16797335	L1MD1	-	LINE/L1	L1MD1	4.92258	2.60611	3.76435	1.88886	0.338228	No	10622	ENSG00000157191	NECAP2	Intergenic	21.0525	48.6771	34.8648	-2.31217	0.00163696	Yes	0.650961	1.19433	0.922646	-1.83472	0.102343	No
chr1:16797336-16797648:AluY	chr1	16797336	16797648	AluY	+	SINE/Alu	AluY	5.12002	3.8507	4.48536	1.32963	0.728574	No	10764	ENSG00000157191	NECAP2	Intergenic	0.896148	1.32808	1.11211	-1.48198	0.33979	No	33.3244	81.5778	57.4511	-2.44799	0.000202352	Yes
chr1:167976183-167977200:L2c	chr1	167976183	167977200	L2c	+	LINE/L2	L2c	3.82174	1.59189	2.70682	2.40075	0.202031	No	0	ENSG00000143164	DCAF6	Intronic	7.3713	2.90217	5.13674	2.53992	0.0784338	No	0.536704	0.642394	0.589549	-1.19693	0.102343	No
chr1:16797649-16798391:L1MD1	chr1	16797649	16798391	L1MD1	-	LINE/L1	L1MD1	37.1899	19.2634	28.2266	1.9306	0.199151	No	11077	ENSG00000157191	NECAP2	Intergenic	121.133	227.743	174.438	-1.88011	0.0014198	No	1.51463	2.77825	2.14644	-1.83428	0.135017	No
chr1:16798444-16800584:L1MD1	chr1	16798444	16800584	L1MD1	-	LINE/L1	L1MD1	129.796	61.1909	95.4935	2.12117	0.201803	No	11872	ENSG00000157191	NECAP2	Intergenic	277.313	495.917	386.615	-1.78829	0.0182607	No	4.40738	3.385	3.89619	1.30204	0.551878	No
chr1:167995581-167996459:L2	chr1	167995581	167996459	L2	-	LINE/L2	L2	16.2569	4.39238	10.3246	3.70115	0.00239424	Yes	0	ENSG00000143164	DCAF6	Intronic	0.556911	0.915263	0.736087	-1.64346	0.0536618	No	21.5019	6.89071	14.1963	3.12042	0.00199783	Yes
chr1:168009130-168009785:L2a	chr1	168009130	168009785	L2a	-	LINE/L2	L2a	1.76891	1.3033	1.5361	1.35726	0.687284	No	0	ENSG00000143164	DCAF6	Intronic	0.583067	0.705519	0.644293	-1.21001	0.228088	No	11.3035	5.17483	8.23916	2.18432	0.0928762	No
chr1:16801076-16801148:MIRc	chr1	16801076	16801148	MIRc	+	SINE/MIR	MIRc	3.7582	2.4982	3.1282	1.50437	0.594723	No	14504	ENSG00000157191	NECAP2	Intergenic	0.536393	0.640152	0.588272	-1.19344	0.0952777	No	7.82661	9.27481	8.55071	-1.18504	0.646433	No
chr1:16801186-16801481:AluSz	chr1	16801186	16801481	AluSz	+	SINE/Alu	AluSz	7.01661	3.42671	5.22166	2.04762	0.313916	No	14614	ENSG00000157191	NECAP2	Intergenic	0.544596	0.668134	0.606365	-1.22684	0.107196	No	5.61128	9.88991	7.7506	-1.7625	0.12501	No
chr1:16802116-16802241:MIR	chr1	16802116	16802241	MIR	-	SINE/MIR	MIR	3.55777	2.96458	3.26118	1.20009	0.806043	No	15544	ENSG00000157191	NECAP2	Intergenic	4.08329	6.21602	5.14966	-1.52231	0.239541	No	0.536704	0.640414	0.588559	-1.19324	0.102343	No
chr1:168050099-168050400:AluSp	chr1	168050099	168050400	AluSp	-	SINE/Alu	AluSp	5.64939	158.783	82.2161	-28.1062	1.70239e-08	Yes	3598	ENSG00000143147	GPR161	afterGene	10.9752	233.782	122.379	-21.3009	8.19812e-27	Yes	0.544896	0.837272	0.691084	-1.53657	0.0272772	No
chr1:168050715-168050964:MIR	chr1	168050715	168050964	MIR	-	SINE/MIR	MIR	13.5194	168.205	90.8621	-12.4417	4.12051e-09	Yes	3034	ENSG00000143147	GPR161	afterGene	14.2372	269.561	141.899	-18.9336	2.67356e-22	Yes	0.544896	0.860695	0.702795	-1.57956	0.0386059	No
chr1:168050972-168051036:MIRb	chr1	168050972	168051036	MIRb	+	SINE/MIR	MIRb	2.66554	62.4658	32.5657	-23.4345	7.76865e-08	Yes	2962	ENSG00000143147	GPR161	afterGene	0.544596	0.724571	0.634583	-1.33047	0.0952777	No	7.9178	127.87	67.8939	-16.1497	2.94914e-17	Yes
chr1:168052197-168052312:L2c	chr1	168052197	168052312	L2c	+	LINE/L2	L2c	4.04813	109.381	56.7146	-27.0202	7.68207e-09	Yes	1686	ENSG00000143147	GPR161	afterGene	0.56583	0.896503	0.731167	-1.5844	0.086744	No	4.98173	88.2725	46.6271	-17.7193	2.30952e-16	Yes
chr1:168052397-168052447:L2d2	chr1	168052397	168052447	L2d2	+	LINE/L2	L2d2	6.12407	69.9655	38.0448	-11.4247	1.71353e-07	Yes	1551	ENSG00000143147	GPR161	afterGene	0.723001	0.643335	0.683168	1.12383	0.428896	No	1.55875	52.0857	26.8222	-33.4151	6.54905e-17	Yes
chr1:168053586-168053770:MIR3	chr1	168053586	168053770	MIR3	-	SINE/MIR	MIR3	8.19411	120.262	64.228	-14.6766	2.78658e-08	Yes	228	ENSG00000143147	GPR161	afterGene	4.04723	72.8853	38.4663	-18.0087	1.08863e-13	Yes	0.646159	0.753712	0.699936	-1.16645	0.427848	No
chr1:168091276-168092229:L2a	chr1	168091276	168092229	L2a	+	LINE/L2	L2a	1.79457	1.58271	1.68864	1.13387	0.871129	No	0	ENSG00000143147	GPR161	Intronic	0.544596	0.689199	0.616897	-1.26552	0.0952777	No	0.708364	2.92135	1.81486	-4.12408	0.000933654	Yes
chr1:168193716-168194179:MER4A1	chr1	168193716	168194179	MER4A1	+	LTR/ERV1	MER4A1	4.1189	22.5494	13.3341	-5.47461	0.000220292	Yes	-998	ENSG00000213064	SFT2D2	Intergenic	0.631143	0.754704	0.692923	-1.19577	0.28953	No	8.84097	45.9009	27.371	-5.19184	3.41674e-10	Yes
chr1:16820214-16820369:LTR2	chr1	16820214	16820369	LTR2	+	LTR/ERV1	LTR2	1.99797	1.33955	1.66876	1.49152	0.59839	No	33642	ENSG00000157191	NECAP2	Intergenic	0.536393	0.640152	0.588272	-1.19344	0.0952777	No	4.41454	8.02111	6.21783	-1.81698	0.102343	No
chr1:16823447-16823656:L2b	chr1	16823447	16823656	L2b	+	LINE/L2	L2b	1.79113	1.51031	1.65072	1.18594	0.824173	No	36875	ENSG00000157191	NECAP2	Intergenic	0.591056	0.642131	0.616594	-1.08641	0.493768	No	2.32828	2.3995	2.36389	-1.03059	0.955851	No
chr1:16823974-16824209:L2b	chr1	16823974	16824209	L2b	+	LINE/L2	L2b	4.05676	1.45374	2.75525	2.79057	0.131747	No	37402	ENSG00000157191	NECAP2	Intergenic	0.536393	0.640152	0.588272	-1.19344	0.0952777	No	7.76303	13.6608	10.7119	-1.75973	0.102343	No
chr1:16862339-16862499:L2	chr1	16862339	16862499	L2	+	LINE/L2	L2	4.58869	27.1994	15.894	-5.92748	0.000273311	Yes	-3063	ENSG00000268674	FAM231B	Intergenic	5.96612	18.5244	12.2453	-3.10494	0.000473106	Yes	0.560354	2.08726	1.32381	-3.7249	0.000139456	Yes
chr1:16862584-16862758:MER20	chr1	16862584	16862758	MER20	-	DNA/hAT-Charlie	MER20	4.92721	21.3155	13.1213	-4.32607	0.000811282	Yes	-2804	ENSG00000268674	FAM231B	Intergenic	0.56583	1.85558	1.2107	-3.27939	0.000796352	Yes	2.61954	9.91812	6.26883	-3.7862	0.00205146	Yes
chr1:16864066-16864417:THE1A	chr1	16864066	16864417	THE1A	-	LTR/ERVL-MaLR	THE1A	1.78032	7.08789	4.4341	-3.98125	0.0196512	Yes	-1145	ENSG00000268674	FAM231B	Intergenic	0.553583	1.00717	0.780379	-1.81938	0.0366489	No	4.42069	4.61824	4.51946	-1.04469	0.922323	No
chr1:16885434-16886203:L1MEc	chr1	16885434	16886203	L1MEc	-	LINE/L1	L1MEc	2.55957	1.49848	2.02902	1.70811	0.459287	No	2612	ENSG00000219481	NBPF1	afterGene	0.659033	0.825754	0.742393	-1.25298	0.277604	No	6.5421	7.43678	6.98944	-1.13676	0.783561	No
chr1:16922614-16923697:L1MB7	chr1	16922614	16923697	L1MB7	-	LINE/L1	L1MB7	8.54603	21.0977	14.8219	-2.46871	0.0274522	Yes	0	ENSG00000219481	NBPF1	Intronic	32.7934	59.0855	45.9394	-1.80175	0.0248806	No	0.702385	0.698265	0.700325	1.0059	0.98029	No
chr1:169359877-169361357:PABL_A-int	chr1	169359877	169361357	PABL_A-int|PABL_A	-	LTR/ERV1	PABL_A-int	18.8891	14.558	16.7236	1.29751	0.687386	No	0	ENSG00000117475	BLZF1	Intronic	3.67843	2.08004	2.87923	1.76844	0.155227	No	12.9449	32.3494	22.6471	-2.49901	0.00837677	Yes
chr1:169361763-169362497:MER21C	chr1	169361763	169362497	MER21C	+	LTR/ERVL	MER21C	13.0122	12.3458	12.679	1.05398	0.9223	No	0	ENSG00000117475	BLZF1	Intronic	18.0733	30.7028	24.388	-1.69879	0.0952777	No	0.946641	1.16798	1.05731	-1.23381	0.61352	No
chr1:169456930-169457216:AluSz	chr1	169456930	169457216	AluSz	+	SINE/Alu	AluSz	11.9625	7.832	9.89726	1.52739	0.321235	No	-1690	ENSG00000117479	SLC19A2	Intergenic	7.94729	6.37795	7.16262	1.24606	0.570931	No	0.536704	0.640414	0.588559	-1.19324	0.102343	No
chr1:169457390-169457978:MLT1E2	chr1	169457390	169457978	MLT1E2	+	LTR/ERVL-MaLR	MLT1E2	22.1848	13.3349	17.7599	1.66366	0.268205	No	-2150	ENSG00000117479	SLC19A2	Intergenic	20.4025	17.9644	19.1834	1.13572	0.687728	No	0.536704	0.640414	0.588559	-1.19324	0.102343	No
chr1:169457996-169458913:L1MB5	chr1	169457996	169458913	L1MB5	-	LINE/L1	L1MB5	27.4934	18.0794	22.7864	1.52071	0.276278	No	-2756	ENSG00000117479	SLC19A2	Intergenic	0.536393	0.640152	0.588272	-1.19344	0.0952777	No	47.9378	29.3097	38.6238	1.63556	0.0681173	No
chr1:16946621-16946819:L2c	chr1	16946621	16946819	L2c	-	LINE/L2	L2c	15.3784	8.46827	11.9233	1.816	0.366594	No	-6565	ENSG00000219481	NBPF1	Intergenic	33.0508	64.2911	48.671	-1.94522	0.00869046	No	0.544896	0.670496	0.607696	-1.2305	0.102343	No
chr1:16947319-16947619:AluSc8	chr1	16947319	16947619	AluSc8	-	SINE/Alu	AluSc8	3.45653	3.26975	3.36314	1.05712	0.957155	No	-7263	ENSG00000219481	NBPF1	Intergenic	10.0439	24.3996	17.2218	-2.4293	0.0034031	Yes	0.544896	0.759433	0.652164	-1.39372	0.0907978	No
chr1:16947686-16947807:MER91B	chr1	16947686	16947807	MER91B	-	DNA/hAT-Tip100	MER91B	4.15966	2.88229	3.52098	1.44318	0.696708	No	-7630	ENSG00000219481	NBPF1	Intergenic	11.6606	29.3591	20.5098	-2.5178	0.00143323	Yes	0.536704	0.640414	0.588559	-1.19324	0.102343	No
chr1:16947873-16948088:MIR	chr1	16947873	16948088	MIR	-	SINE/MIR	MIR	15.6492	5.28705	10.4681	2.95991	0.146089	No	-7817	ENSG00000219481	NBPF1	Intergenic	26.048	56.1907	41.1193	-2.1572	0.00963962	Yes	0.544896	0.702614	0.623755	-1.28945	0.102343	No
chr1:16948744-16948856:MIRc	chr1	16948744	16948856	MIRc	+	SINE/MIR	MIRc	6.06846	2.21257	4.14052	2.74273	0.185476	No	-8688	ENSG00000219481	NBPF1	Intergenic	0.544596	0.642131	0.593363	-1.1791	0.124364	No	12.9055	22.9413	17.9234	-1.77763	0.102343	No
chr1:16948909-16949197:AluSq2	chr1	16948909	16949197	AluSq2	+	SINE/Alu	AluSq2	15.6105	4.5993	10.1049	3.3941	0.0900508	No	-8853	ENSG00000219481	NBPF1	Intergenic	0.536393	0.656127	0.59626	-1.22322	0.0952777	No	14.0215	24.9225	19.472	-1.77744	0.102293	No
chr1:16949205-16949487:AluSp	chr1	16949205	16949487	AluSp	+	SINE/Alu	AluSp	6.29017	2.62797	4.45907	2.39355	0.291935	No	-9149	ENSG00000219481	NBPF1	Intergenic	0.536393	0.641892	0.589142	-1.19668	0.0952777	No	12.7584	34.36	23.5592	-2.69312	0.00143538	Yes
chr1:16949525-16949696:MIRb	chr1	16949525	16949696	MIRb	-	SINE/MIR	MIRb	8.91875	3.03024	5.97449	2.94325	0.132042	No	-9469	ENSG00000219481	NBPF1	Intergenic	14.1958	33.5121	23.8539	-2.36071	0.00665236	Yes	0.536704	0.734047	0.635375	-1.3677	0.0736104	No
chr1:16949738-16949993:Tigger19a	chr1	16949738	16949993	Tigger19a	-	DNA/TcMar-Tigger	Tigger19a	13.0725	4.57078	8.82163	2.86001	0.175431	No	-9682	ENSG00000219481	NBPF1	Intergenic	21.0935	42.9037	31.9986	-2.03398	0.034706	Yes	0.536704	0.665607	0.601155	-1.24018	0.102343	No
chr1:16950080-16950279:MIRb	chr1	16950080	16950279	MIRb	-	SINE/MIR	MIRb	7.0964	2.34283	4.71961	3.02899	0.178072	No	-10024	ENSG00000219481	NBPF1	Intergenic	10.6276	19.9839	15.3057	-1.88038	0.0672262	No	0.544896	0.688885	0.61689	-1.26425	0.102343	No
chr1:16951057-16951133:MIRc	chr1	16951057	16951133	MIRc	+	SINE/MIR	MIRc	2.96313	1.4122	2.18766	2.09824	0.296478	No	-11001	ENSG00000219481	NBPF1	Intergenic	0.544596	0.640152	0.592374	-1.17546	0.127035	No	3.11022	6.9139	5.01206	-2.22296	0.0789483	No
chr1:16951165-16951464:AluSz	chr1	16951165	16951464	AluSz	+	SINE/Alu	AluSz	2.46492	2.22603	2.34547	1.10732	0.910327	No	-11109	ENSG00000219481	NBPF1	Intergenic	0.536393	0.640152	0.588272	-1.19344	0.0952777	No	1.4889	4.45977	2.97434	-2.99534	0.0127571	Yes
chr1:16951777-16952066:AluSc8	chr1	16951777	16952066	AluSc8	-	SINE/Alu	AluSc8	2.38517	1.47531	1.93024	1.61672	0.484106	No	-11721	ENSG00000219481	NBPF1	Intergenic	1.91729	4.09784	3.00757	-2.13731	0.0915628	No	0.536704	0.640414	0.588559	-1.19324	0.102343	No
chr1:16952067-16952191:MIR	chr1	16952067	16952191	MIR	-	SINE/MIR	MIR	5.79123	2.10038	3.9458	2.75724	0.163622	No	-12011	ENSG00000219481	NBPF1	Intergenic	3.73256	4.84531	4.28894	-1.29812	0.482261	No	0.536704	0.640414	0.588559	-1.19324	0.102343	No
chr1:16959129-16959431:AluSx	chr1	16959129	16959431	AluSx	-	SINE/Alu	AluSx	3.96633	1.78792	2.87713	2.2184	0.291431	No	-19073	ENSG00000219481	NBPF1	Intergenic	3.41357	10.9712	7.19236	-3.21398	0.00885862	Yes	0.594113	0.661752	0.627933	-1.11385	0.416184	No
chr1:16961526-16961832:AluSx	chr1	16961526	16961832	AluSx	-	SINE/Alu	AluSx	18.9915	17.5018	18.2467	1.08511	0.858276	No	-21470	ENSG00000219481	NBPF1	Intergenic	14.7968	17.6024	16.1996	-1.18962	0.525366	No	0.56344	0.642394	0.602917	-1.14013	0.24478	No
chr1:16967695-16968425:L1MA2	chr1	16967695	16968425	L1MA2	+	LINE/L1	L1MA2	2.3268	1.58258	1.95469	1.47025	0.630425	No	-27639	ENSG00000219481	NBPF1	Intergenic	0.536393	0.640152	0.588272	-1.19344	0.0952777	No	2.3648	4.06084	3.21282	-1.7172	0.236722	No
chr1:169840321-169842568:THE1B-int	chr1	169840321	169842568	THE1B|THE1B-int|THE1B	+	LTR/ERVL-MaLR	THE1B-int	19.0678	5.51678	12.2923	3.45633	0.136724	No	0	ENSG00000000457	SCYL3	Intronic	67.4483	155.826	111.637	-2.3103	0.0123457	Yes	2.70419	5.47797	4.09108	-2.02573	0.102343	No
chr1:169892802-169893386:MamRep605	chr1	169892802	169893386	MamRep605	+	LTR?	MamRep605	5.04503	2.96852	4.00678	1.69951	0.558446	No	0	ENSG00000075945	KIFAP3	Intronic	0.548921	0.657351	0.603136	-1.19753	0.112849	No	38.6708	50.2223	44.4466	-1.29871	0.42155	No
chr1:169893793-169894277:LTR86A1	chr1	169893793	169894277	LTR86A1	+	LTR/ERVL	LTR86A1	2.41223	2.66395	2.53809	-1.10435	0.920733	No	0	ENSG00000075945	KIFAP3	Intronic	0.659033	0.640152	0.649592	1.02949	0.848138	No	19.6184	26.4925	23.0554	-1.35039	0.419159	No
chr1:169894962-169895022:AmnSINE1	chr1	169894962	169895022	AmnSINE1	+	SINE/5S-Deu-L2	AmnSINE1	30.1375	4.93883	17.5382	6.10215	0.000274554	Yes	0	ENSG00000075945	KIFAP3	Intronic	0.699203	0.64246	0.670832	1.08832	0.551315	No	416.541	25.3878	220.964	16.4071	2.94486e-11	Yes
chr1:17195916-17196422:L1ME2	chr1	17195916	17196422	L1ME2	-	LINE/L1	L1ME2	1.83214	16.4685	9.15034	-8.98869	0.000203811	Yes	0	ENSG00000058453	CROCC	Intronic	3.68262	15.0255	9.35405	-4.08011	0.000239013	Yes	0.635983	0.640414	0.638198	-1.00697	0.964892	No
chr1:17196506-17196857:THE1A	chr1	17196506	17196857	THE1A	+	LTR/ERVL-MaLR	THE1A	1.91568	41.463	21.6893	-21.644	4.37892e-07	Yes	0	ENSG00000058453	CROCC	Intronic	0.563151	0.97365	0.768401	-1.72893	0.0491078	No	8.18922	33.5879	20.8886	-4.10148	1.28234e-05	Yes
chr1:17197035-17197280:MLT1A0	chr1	17197035	17197280	MLT1A0	+	LTR/ERVL-MaLR	MLT1A0	1.53615	15.9888	8.76248	-10.4084	1.46394e-05	Yes	0	ENSG00000058453	CROCC	Intronic	0.536393	1.32278	0.929584	-2.46606	0.0049656	Yes	3.35007	14.6768	9.01341	-4.38102	1.56785e-05	Yes
chr1:172009673-172010736:L2c	chr1	172009673	172010736	L2c	-	LINE/L2	L2c	2.55492	1.22618	1.89055	2.08363	0.272308	No	0	ENSG00000197959	DNM3	Intronic	0.536393	0.640152	0.588272	-1.19344	0.0952777	No	1.74445	2.27874	2.01159	-1.30628	0.60558	No
chr1:172060316-172061451:L2a	chr1	172060316	172061451	L2a	-	LINE/L2	L2a	3.58414	0.694021	2.13908	5.16431	0.00375333	Yes	0	ENSG00000197959	DNM3	Intronic	0.536393	0.642131	0.589262	-1.19713	0.0952777	No	1.11063	1.64882	1.37973	-1.48458	0.470089	No
chr1:17220908-17221457:MER41E	chr1	17220908	17221457	MER41E	-	LTR/ERV1	MER41E	3.90399	14.9315	9.41774	-3.82467	0.00324307	Yes	0	ENSG00000058453	CROCC	Intronic	17.3724	31.3887	24.3805	-1.80681	0.059125	No	0.717129	0.749851	0.73349	-1.04563	0.838668	No
chr1:172271049-172277171:L1PA6	chr1	172271049	172277171	L1PA6	+	LINE/L1	L1PA6	2.95224	1.18319	2.06771	2.49514	0.162296	No	0	ENSG00000197959	DNM3	Intronic	12.7157	7.08518	9.90046	1.79469	0.205487	No	0.695578	0.793179	0.744379	-1.14032	0.594486	No
chr1:172315291-172315642:L2c	chr1	172315291	172315642	L2c	-	LINE/L2	L2c	0.756232	0.55608	0.656156	1.35993	0.393766	No	0	ENSG00000197959	DNM3	Intronic	0.536393	0.757824	0.647109	-1.41282	0.0655927	No	2.68943	0.999467	1.84445	2.69087	0.04993	Yes
chr1:172375142-172375370:L2c	chr1	172375142	172375370	L2c	-	LINE/L2	L2c	3.97082	0.948815	2.45982	4.18503	0.017933	Yes	0	ENSG00000197959	DNM3	Intronic	0.536393	0.656277	0.596335	-1.2235	0.0952777	No	4.77971	1.96434	3.37202	2.43324	0.102343	No
chr1:17320463-17320613:L2c	chr1	17320463	17320613	L2c	+	LINE/L2	L2c	2.56915	1.7917	2.18043	1.43392	0.657184	No	0	ENSG00000159363	ATP13A2	Intronic	0.905186	0.644352	0.774769	1.4048	0.102019	No	17.8474	17.1975	17.5224	1.03779	0.916684	No
chr1:17320737-17321027:AluSx	chr1	17320737	17321027	AluSx	-	SINE/Alu	AluSx	8.6133	2.8815	5.7474	2.98918	0.0505287	No	0	ENSG00000159363	ATP13A2	Intronic	20.2644	17.8669	19.0657	1.13419	0.654286	No	0.60048	0.642394	0.621437	-1.0698	0.589231	No
chr1:173468435-173468737:AluSx4	chr1	173468435	173468737	AluSx4	-	SINE/Alu	AluSx4	2.90746	12.3233	7.61538	-4.23851	0.0135822	Yes	867	ENSG00000162753	SLC9C2	afterGene	0.586324	0.692938	0.639631	-1.18183	0.259132	No	13.9267	15.8667	14.8967	-1.1393	0.76468	No
chr1:173468738-173469520:PABL_A-int	chr1	173468738	173469520	PABL_A-int|MER41A	+	LTR/ERV1	PABL_A-int	5.57977	25.4105	15.4951	-4.55404	0.0130701	Yes	84	ENSG00000162753	SLC9C2	afterGene	22.8677	25.1962	24.032	-1.10183	0.829791	No	0.557284	0.803428	0.680356	-1.44169	0.102343	No
chr1:173574553-173575648:MLT1G1-int	chr1	173574553	173575648	MLT1G1-int|MLT1G1	-	LTR/ERVL-MaLR	MLT1G1-int	44.9672	162.749	103.858	-3.61928	0.000403575	Yes	-2321	ENSG00000162753	SLC9C2	Intergenic	69.6986	176.72	123.209	-2.53548	2.18133e-06	Yes	0.544896	0.691717	0.618307	-1.26945	0.102343	No
chr1:173575736-173575967:Charlie18a	chr1	173575736	173575967	Charlie18a	+	DNA/hAT-Charlie	Charlie18a	12.0782	56.4596	34.2689	-4.6745	0.00144985	Yes	2734	ENSG00000183831	ANKRD45	afterGene	0.536393	0.714771	0.625582	-1.33255	0.0952777	No	21.3817	72.8366	47.1092	-3.40649	1.03287e-06	Yes
chr1:173576616-173576837:L2c	chr1	173576616	173576837	L2c	-	LINE/L2	L2c	8.45961	30.5531	19.5063	-3.61164	0.00514945	Yes	1864	ENSG00000183831	ANKRD45	afterGene	11.8482	53.6558	32.752	-4.52862	2.94027e-08	Yes	0.536704	0.913977	0.72534	-1.70295	0.00963473	No
chr1:173577324-173577446:AluJr4	chr1	173577324	173577446	AluJr4	+	SINE/Alu	AluJr4	3.1987	37.9833	20.591	-11.8746	9.51475e-06	Yes	1255	ENSG00000183831	ANKRD45	afterGene	0.536393	0.640152	0.588272	-1.19344	0.0952777	No	5.51168	17.4698	11.4907	-3.16959	0.00292947	Yes
chr1:173577447-173577755:AluSx	chr1	173577447	173577755	AluSx	-	SINE/Alu	AluSx	7.359	38.7509	23.055	-5.26578	0.000172994	Yes	946	ENSG00000183831	ANKRD45	afterGene	4.93455	22.6401	13.7873	-4.58807	0.000143928	Yes	0.544896	0.640414	0.592655	-1.1753	0.135017	No
chr1:173577756-173577889:AluJr4	chr1	173577756	173577889	AluJr4	+	SINE/Alu	AluJr4	3.36116	21.1648	12.263	-6.29689	0.000225756	Yes	812	ENSG00000183831	ANKRD45	afterGene	0.536393	0.640152	0.588272	-1.19344	0.0952777	No	3.28863	13.618	8.45331	-4.14093	0.00125154	Yes
chr1:173578159-173578346:Tigger11a	chr1	173578159	173578346	Tigger11a	-	DNA/TcMar-Tigger	Tigger11a	6.75594	27.1371	16.9465	-4.01678	0.00975811	Yes	355	ENSG00000183831	ANKRD45	afterGene	3.88018	17.0821	10.4812	-4.40241	0.00032898	Yes	0.536704	0.640414	0.588559	-1.19324	0.102343	No
chr1:173727500-173733995:L1PB1	chr1	173727500	173733995	L1PB1	+	LINE/L1	L1PB1	1.37012	1.02547	1.19779	1.3361	0.64438	No	0	ENSG00000076321	KLHL20	Intronic	3.88317	3.16983	3.5265	1.22504	0.668699	No	0.553941	1.07708	0.815509	-1.94439	0.00525876	No
chr1:173763700-173764874:L1M5	chr1	173763700	173764874	L1M5	+	LINE/L1	L1M5	4.8329	17.842	11.3374	-3.69178	0.00331254	Yes	3815	ENSG00000120334	CENPL	afterGene	0.582982	0.683265	0.633124	-1.17202	0.247512	No	10.5565	61.6971	36.1268	-5.84448	1.53458e-08	Yes
chr1:173764984-173765248:AluSx3	chr1	173764984	173765248	AluSx3	-	SINE/Alu	AluSx3	2.1191	8.27559	5.19734	-3.90524	0.0207073	Yes	3441	ENSG00000120334	CENPL	afterGene	1.90731	8.31136	5.10934	-4.35762	1.78293e-05	Yes	0.536704	0.642736	0.58972	-1.19756	0.102343	No
chr1:173765741-173766050:AluJb	chr1	173765741	173766050	AluJb	+	SINE/Alu	AluJb	2.80228	9.05484	5.92856	-3.23124	0.048612	Yes	2639	ENSG00000120334	CENPL	afterGene	0.536393	0.640152	0.588272	-1.19344	0.0952777	No	1.40274	10.8707	6.13671	-7.74961	1.5331e-07	Yes
chr1:173766091-173766383:AluJb	chr1	173766091	173766383	AluJb	+	SINE/Alu	AluJb	1.51268	8.76985	5.14126	-5.79757	0.00239259	Yes	2306	ENSG00000120334	CENPL	afterGene	0.536393	0.642131	0.589262	-1.19713	0.0952777	No	2.4717	17.7024	10.087	-7.162	2.24455e-08	Yes
chr1:173766384-173767032:L1MC5a	chr1	173766384	173767032	L1MC5a	-	LINE/L1	L1MC5a	2.60936	21.0267	11.818	-8.05817	0.000632541	Yes	1657	ENSG00000120334	CENPL	afterGene	4.08834	30.0233	17.0558	-7.34364	8.11408e-09	Yes	0.536704	0.804833	0.670768	-1.49959	0.0495712	No
chr1:173767234-173767725:MLT1J	chr1	173767234	173767725	MLT1J	-	LTR/ERVL-MaLR	MLT1J	4.17341	18.5981	11.3858	-4.45634	0.000757811	Yes	964	ENSG00000120334	CENPL	afterGene	1.85654	21.2427	11.5496	-11.4421	4.99226e-10	Yes	0.544896	0.640414	0.592655	-1.1753	0.135017	No
chr1:173767773-173768183:L2a	chr1	173767773	173768183	L2a	+	LINE/L2	L2a	2.13658	18.9599	10.5482	-8.87393	0.000115821	Yes	506	ENSG00000120334	CENPL	afterGene	0.544596	0.667769	0.606183	-1.22617	0.0985597	No	2.43188	16.0851	9.25847	-6.61426	3.42309e-06	Yes
chr1:173829085-173830016:Charlie1a	chr1	173829085	173830016	Charlie1a	-	DNA/hAT-Charlie	Charlie1a	5.30995	14.7695	10.0397	-2.78148	0.0276991	Yes	1402	ENSG00000117593	DARS2	afterGene	1.94499	7.77889	4.86194	-3.99945	0.000482264	Yes	5.92473	21.7276	13.8262	-3.66728	3.34038e-05	Yes
chr1:174214215-174214507:AluSp	chr1	174214215	174214507	AluSp	-	SINE/Alu	AluSp	1.53197	2.03756	1.78476	-1.33003	0.668186	No	0	ENSG00000152061	RABGAP1L	Intronic	0.536393	0.640152	0.588272	-1.19344	0.0952777	No	3.73552	7.4624	5.59896	-1.99769	0.0582476	No
chr1:174451026-174451433:MLT1D	chr1	174451026	174451433	MLT1D	+	LTR/ERVL-MaLR	MLT1D	0.571218	0.711307	0.641262	-1.24525	0.628736	No	0	ENSG00000152061	RABGAP1L	Intronic	3.85503	2.40773	3.13138	1.6011	0.300349	No	0.583146	0.642394	0.61277	-1.1016	0.41845	No
chr1:174781755-174782553:L2a	chr1	174781755	174782553	L2a	-	LINE/L2	L2a	1.63138	0.681652	1.15652	2.39328	0.0697182	No	0	ENSG00000152061	RABGAP1L	Intronic	0.536393	0.674125	0.605259	-1.25678	0.0952777	No	1.47228	1.20885	1.34056	1.21792	0.671013	No
chr1:174786439-174787725:L2c	chr1	174786439	174787725	L2c	-	LINE/L2	L2c	5.30337	1.03549	3.16943	5.12162	0.00776698	Yes	0	ENSG00000152061	RABGAP1L	Intronic	0.678224	0.744911	0.711568	-1.09833	0.652606	No	11.4813	2.59617	7.03872	4.42239	0.00444996	Yes
chr1:174801149-174801488:AluSx1	chr1	174801149	174801488	AluSx1	+	SINE/Alu	AluSx1	0.686031	0.587959	0.636995	1.1668	0.708808	No	0	ENSG00000152061	RABGAP1L	Intronic	1.72954	1.57878	1.65416	1.09549	0.854185	No	0.536704	0.640414	0.588559	-1.19324	0.102343	No
chr1:174807786-174808085:AluYc3	chr1	174807786	174808085	AluYc3	+	SINE/Alu	AluYc3	0.824223	0.842248	0.833236	-1.02187	0.969011	No	0	ENSG00000152061	RABGAP1L	Intronic	3.22824	2.09844	2.66334	1.5384	0.338835	No	0.536704	0.640414	0.588559	-1.19324	0.102343	No
chr1:174980958-174981277:AluSz	chr1	174980958	174981277	AluSz	+	SINE/Alu	AluSz	33.281	35.4059	34.3434	-1.06385	0.850775	No	0	ENSG00000120333	MRPS14	Intronic	2.91634	2.6482	2.78227	1.10125	0.820708	No	34.2096	42.881	38.5453	-1.25348	0.263316	No
chr1:174981278-174981763:L1MC5a	chr1	174981278	174981763	L1MC5a	+	LINE/L1	L1MC5a	46.8241	44.651	45.7376	1.04867	0.907799	No	0	ENSG00000120333	MRPS14	Intronic	5.89006	6.19391	6.04199	-1.05159	0.890124	No	59.1696	68.8802	64.0249	-1.16411	0.514803	No
chr1:174988013-174988166:L1ME4b	chr1	174988013	174988166	L1ME4b	-	LINE/L1	L1ME4b	1.28705	1.61871	1.45288	-1.2577	0.705814	No	0	ENSG00000120333	MRPS14	Intronic	0.544596	0.64246	0.593528	-1.1797	0.123412	No	1.98251	2.08797	2.03524	-1.05319	0.905698	No
chr1:174988416-174988728:AluSx1	chr1	174988416	174988728	AluSx1	-	SINE/Alu	AluSx1	1.70718	2.2389	1.97304	-1.31146	0.653718	No	0	ENSG00000120333	MRPS14	Intronic	0.553583	0.895483	0.724533	-1.61761	0.0360301	No	1.2458	1.55343	1.39961	-1.24693	0.606727	No
chr1:174989644-174989871:AluSp	chr1	174989644	174989871	AluSp	-	SINE/Alu	AluSp	4.28141	3.55494	3.91818	1.20435	0.776148	No	0	ENSG00000120333	MRPS14	Intronic	0.595759	0.957244	0.776502	-1.60676	0.124364	No	2.90884	3.23666	3.07275	-1.1127	0.782891	No
chr1:174990016-174991092:L2	chr1	174990016	174991092	L2	+	LINE/L2	L2	14.9114	7.02291	10.9672	2.12325	0.069173	No	0	ENSG00000120333	MRPS14	Intronic	31.4105	23.5235	27.467	1.33528	0.254793	No	1.60934	1.4579	1.53362	1.10388	0.844228	No
chr1:175327376-175328214:L3	chr1	175327376	175328214	L3	-	LINE/CR1	L3	4.67103	1.25042	2.96072	3.73558	0.0277222	Yes	0	ENSG00000116147	TNR	Intronic	6.76069	2.76848	4.76458	2.44202	0.0875492	No	0.641285	0.640414	0.640849	1.00136	0.993293	No
chr1:175895427-175895977:MLT2A2	chr1	175895427	175895977	MLT2A2	-	LTR/ERVL	MLT2A2	13.3983	9.90071	11.6495	1.35327	0.558787	No	17991	ENSG00000143207	RFWD2	Intergenic	23.1511	28.4505	25.8008	-1.22891	0.448575	No	0.544896	0.642394	0.593645	-1.17893	0.131915	No
chr1:175945407-175945713:AluSz	chr1	175945407	175945713	AluSz	-	SINE/Alu	AluSz	0.570769	0.597884	0.584326	-1.04751	0.906628	No	0	ENSG00000143207	RFWD2	Intronic	1.87764	2.57468	2.22616	-1.37123	0.492094	No	0.536704	0.640414	0.588559	-1.19324	0.102343	No
chr1:176022300-176023294:L2	chr1	176022300	176023294	L2	+	LINE/L2	L2	2.03902	0.83532	1.43717	2.441	0.119303	No	0	ENSG00000143207	RFWD2	Intronic	0.582982	0.688566	0.635774	-1.18111	0.24746	No	4.44479	2.62332	3.53405	1.69433	0.230768	No
chr1:176045160-176048783:L1PA16	chr1	176045160	176048783	L1PA16	+	LINE/L1	L1PA16	1.83246	1.98864	1.91055	-1.08523	0.933495	No	0	ENSG00000143207	RFWD2	Intronic	0.536393	0.640152	0.588272	-1.19344	0.0952777	No	1.3712	1.69495	1.53307	-1.2361	0.694606	No
chr1:176828945-176829450:MLT1H1	chr1	176828945	176829450	MLT1H1	-	LTR/ERVL-MaLR	MLT1H1	34.8503	27.3883	31.1193	1.27245	0.625803	No	0	ENSG00000152092	ASTN1	Intronic	75.3289	49.3849	62.3569	1.52534	0.0862102	No	0.597142	0.659803	0.628473	-1.10493	0.448397	No
chr1:176856176-176856609:L2c	chr1	176856176	176856609	L2c	+	LINE/L2	L2c	2.42192	1.8798	2.15086	1.28839	0.759314	No	0	ENSG00000152092	ASTN1	Intronic	0.582982	0.783224	0.683103	-1.34348	0.1164	No	9.01735	10.1882	9.60277	-1.12984	0.787633	No
chr1:176942043-176942961:L2	chr1	176942043	176942961	L2	+	LINE/L2	L2	3.30965	1.2714	2.29052	2.60315	0.137881	No	0	ENSG00000152092	ASTN1	Intronic	0.544596	0.642131	0.593363	-1.1791	0.124364	No	3.38113	1.85663	2.61888	1.82112	0.208764	No
chr1:177169459-177169946:L2a	chr1	177169459	177169946	L2a	+	LINE/L2	L2a	1.88027	0.697191	1.28873	2.69693	0.0211771	Yes	0	ENSG00000198797	BRINP2	Intronic	7.29371	1.01988	4.15679	7.15157	1.64206e-05	Yes	0.536704	0.640414	0.588559	-1.19324	0.102343	No
chr1:177231664-177232873:L2a	chr1	177231664	177232873	L2a	-	LINE/L2	L2a	4.05302	1.02607	2.53954	3.95003	0.0329575	Yes	0	ENSG00000198797	BRINP2	Intronic	0.731698	0.676621	0.704159	1.0814	0.667145	No	5.30469	1.1235	3.21409	4.72157	0.00149479	Yes
chr1:178084534-178085131:L2b	chr1	178084534	178085131	L2b	-	LINE/L2	L2b	0.57056	0.530954	0.550757	1.07459	0.828534	No	0	ENSG00000075391	RASAL2	Intronic	0.536393	0.642733	0.589563	-1.19825	0.0952777	No	1.59082	1.32627	1.45854	1.19947	0.676937	No
chr1:178110354-178112194:HERV17-int	chr1	178110354	178112194	LTR17|HERV17-int|HERV17-int|HERV17-int	-	LTR/ERV1	HERV17-int	1.51591	0.873141	1.19453	1.73616	0.312854	No	0	ENSG00000075391	RASAL2	Intronic	0.536393	0.640152	0.588272	-1.19344	0.0952777	No	1.47459	0.95278	1.21369	1.54767	0.301261	No
chr1:178213694-178219834:L1PA8	chr1	178213694	178219834	L1PA8	-	LINE/L1	L1PA8	1.0738	0.777544	0.925673	1.38102	0.509474	No	0	ENSG00000075391	RASAL2	Intronic	0.536393	0.640152	0.588272	-1.19344	0.0952777	No	1.90709	1.24327	1.57518	1.53393	0.339092	No
chr1:178280424-178281981:HAL1	chr1	178280424	178281981	HAL1	+	LINE/L1	HAL1	0.895678	0.510146	0.702912	1.75573	0.0770525	No	0	ENSG00000075391	RASAL2	Intronic	10.035	1.05317	5.5441	9.52843	2.44049e-06	Yes	0.652584	0.659803	0.656194	-1.01106	0.949077	No
chr1:178416837-178417523:L2a	chr1	178416837	178417523	L2a	-	LINE/L2	L2a	1.4727	0.949366	1.21103	1.55125	0.457214	No	0	ENSG00000075391	RASAL2	Intronic	0.536393	0.642131	0.589262	-1.19713	0.0952777	No	10.4425	4.85937	7.65095	2.14895	0.0927387	No
chr1:178453125-178453541:L1ME3Cz	chr1	178453125	178453541	L1ME3Cz	-	LINE/L1	L1ME3Cz	5.89581	2.16369	4.02975	2.72488	0.106653	No	4482	ENSG00000075391	RASAL2	afterGene	0.544596	0.647214	0.595905	-1.18843	0.110831	No	19.6895	6.45019	13.0699	3.05255	0.0054964	Yes
chr1:178519773-178520434:L2a	chr1	178519773	178520434	L2a	-	LINE/L2	L2a	9.9486	4.45022	7.19941	2.23553	0.226356	No	1750	ENSG00000213057	C1orf220	afterGene	0.794822	0.963862	0.879342	-1.21268	0.563243	No	24.2746	49.5092	36.8919	-2.03955	0.020583	Yes
chr1:178523211-178529616:HERVK9-int	chr1	178523211	178529616	MER9a2|HERVK9-int|HERVK9-int|MER9a2	-	LTR/ERVK	HERVK9-int	0.738559	1.08154	0.910049	-1.46439	0.481074	No	5188	ENSG00000213057	C1orf220	Intergenic	0.842223	3.81055	2.32639	-4.52439	0.000505525	Yes	1.14972	1.35613	1.25293	-1.17954	0.732416	No
chr1:17896614-17898017:L2a	chr1	17896614	17898017	L2a	-	LINE/L2	L2a	1.50311	1.41661	1.45986	1.06106	0.937764	No	0	ENSG00000074964	ARHGEF10L	Intronic	0.536393	0.640152	0.588272	-1.19344	0.0952777	No	0.718799	2.86732	1.79306	-3.98905	0.00219216	Yes
chr1:17965676-17965829:MIRb	chr1	17965676	17965829	MIRb	-	SINE/MIR	MIRb	1.25962	1.0809	1.17026	1.16535	0.833564	No	0	ENSG00000074964	ARHGEF10L	Intronic	0.601152	0.640152	0.620652	-1.06488	0.613943	No	8.0273	16.9308	12.4791	-2.10916	0.0278037	Yes
chr1:18015491-18015660:MIRb	chr1	18015491	18015660	MIRb	-	SINE/MIR	MIRb	1.12629	1.00544	1.06586	1.1202	0.841338	No	0	ENSG00000074964	ARHGEF10L	Intronic	0.536393	0.642131	0.589262	-1.19713	0.0952777	No	1.90002	4.33629	3.11816	-2.28223	0.0634799	No
chr1:18015679-18015815:MIRb	chr1	18015679	18015815	MIRb	+	SINE/MIR	MIRb	0.78434	0.817431	0.800886	-1.04219	0.939842	No	0	ENSG00000074964	ARHGEF10L	Intronic	2.377	3.32021	2.8486	-1.39681	0.423656	No	0.536704	0.640414	0.588559	-1.19324	0.102343	No
chr1:180161308-180162253:L2a	chr1	180161308	180162253	L2a	-	LINE/L2	L2a	5.16435	2.94995	4.05715	1.75066	0.427252	No	0	ENSG00000116260	QSOX1	Intronic	0.544596	0.659554	0.602075	-1.21109	0.0952777	No	12.6488	24.2381	18.4434	-1.91624	0.0560941	No
chr1:18016389-18016640:MIRc	chr1	18016389	18016640	MIRc	-	SINE/MIR	MIRc	0.684078	1.13967	0.911873	-1.66599	0.259616	No	0	ENSG00000074964	ARHGEF10L	Intronic	0.553583	0.640152	0.596867	-1.15638	0.179605	No	3.9635	7.79103	5.87727	-1.96569	0.102343	No
chr1:18016841-18016936:MIRb	chr1	18016841	18016936	MIRb	+	SINE/MIR	MIRb	1.16567	0.819889	0.99278	1.42174	0.480291	No	0	ENSG00000074964	ARHGEF10L	Intronic	1.65908	5.03061	3.34485	-3.03217	0.00755546	Yes	0.536704	0.640414	0.588559	-1.19324	0.102343	No
chr1:18018353-18018529:L2a	chr1	18018353	18018529	L2a	-	LINE/L2	L2a	1.16654	0.740475	0.953506	1.57539	0.369625	No	0	ENSG00000074964	ARHGEF10L	Intronic	0.544596	0.640152	0.592374	-1.17546	0.127035	No	2.21822	7.05724	4.63773	-3.18148	0.0048377	Yes
chr1:18018821-18019490:L2b	chr1	18018821	18019490	L2b	+	LINE/L2	L2b	2.10576	1.78967	1.94772	1.17661	0.850775	No	0	ENSG00000074964	ARHGEF10L	Intronic	4.90236	17.5386	11.2205	-3.57759	0.000834296	Yes	0.536704	0.640414	0.588559	-1.19324	0.102343	No
chr1:18019778-18019896:L2b	chr1	18019778	18019896	L2b	+	LINE/L2	L2b	0.984701	1.02772	1.00621	-1.04369	0.940819	No	0	ENSG00000074964	ARHGEF10L	Intronic	1.86924	5.14665	3.50794	-2.75334	0.034241	Yes	0.544896	0.642736	0.593816	-1.17956	0.130788	No
chr1:18020123-18020251:MIRc	chr1	18020123	18020251	MIRc	+	SINE/MIR	MIRc	0.820656	0.873182	0.846919	-1.06401	0.913173	No	0	ENSG00000074964	ARHGEF10L	Intronic	1.99644	5.38723	3.69183	-2.69842	0.0226371	Yes	0.544896	0.640414	0.592655	-1.1753	0.135017	No
chr1:18022778-18023092:L2c	chr1	18022778	18023092	L2c	-	LINE/L2	L2c	0.901709	0.636593	0.769151	1.41646	0.412734	No	0	ENSG00000074964	ARHGEF10L	Intronic	0.553583	0.64246	0.598022	-1.16055	0.16879	No	2.67747	8.37498	5.52623	-3.12795	0.00623161	Yes
chr1:1803156-1803435:L2	chr1	1803156	1803435	L2	+	LINE/L2	L2	1.79698	1.04299	1.41999	1.7229	0.36168	No	0	ENSG00000078369	GNB1	Intronic	0.536393	0.640152	0.588272	-1.19344	0.0952777	No	1.55768	2.17008	1.86388	-1.39315	0.46137	No
chr1:180671608-180672767:L1M2	chr1	180671608	180672767	L1M2	-	LINE/L1	L1M2	0.570689	1.14206	0.856374	-2.0012	0.154425	No	0	ENSG00000143324	XPR1	Intronic	0.536393	0.670026	0.603209	-1.24913	0.0952777	No	0.652294	1.05803	0.855162	-1.62201	0.102343	No
chr1:180807124-180807562:Tigger2a	chr1	180807124	180807562	Tigger2a	-	DNA/TcMar-Tigger	Tigger2a	3.55153	21.7323	12.6419	-6.11913	0.000215768	Yes	0	ENSG00000143324	XPR1	Intronic	0.536393	0.680725	0.608559	-1.26908	0.0952777	No	12.7589	27.4249	20.0919	-2.14947	0.0274437	Yes
chr1:180862917-180866063:ERV3-16A3_I-int	chr1	180862917	180866063	ERV3-16A3_I-int|ERV3-16A3_I-int|ERV3-16A3_I-int	+	LTR/ERVL	ERV3-16A3_I-int	1.13881	2.02619	1.5825	-1.77921	0.393028	No	3531	ENSG00000143324	XPR1	afterGene	1.5848	8.63052	5.10766	-5.4458	5.48025e-07	Yes	0.710367	1.1279	0.919136	-1.58778	0.120026	No
chr1:180908421-180909356:L2b	chr1	180908421	180909356	L2b	+	LINE/L2	L2b	1.29047	2.99549	2.14298	-2.32124	0.230619	No	0	ENSG00000135835	KIAA1614	Intronic	2.47973	1.26967	1.8747	1.95304	0.105287	No	2.14518	5.32267	3.73393	-2.48122	0.0636995	No
chr1:180927668-180929938:THE1A-int	chr1	180927668	180929938	THE1A|THE1A-int|THE1A	-	LTR/ERVL-MaLR	THE1A-int	5.72402	9.86636	7.79519	-1.72368	0.214432	No	6919	ENSG00000135835	KIAA1614	Intergenic	7.1153	27.253	17.1842	-3.8302	3.41837e-05	Yes	2.54315	6.53074	4.53694	-2.56798	0.0260294	Yes
chr1:181409817-181410149:AluJb	chr1	181409817	181410149	AluJb	+	SINE/Alu	AluJb	0.686255	0.749455	0.717855	-1.09209	0.87144	No	0	ENSG00000198216	CACNA1E	Intronic	1.1055	4.89202	2.99876	-4.42517	0.000679514	Yes	0.641285	0.642394	0.641839	-1.00173	0.993293	No
chr1:181410296-181410585:AluSc8	chr1	181410296	181410585	AluSc8	-	SINE/Alu	AluSc8	1.38125	0.729739	1.05549	1.89279	0.137867	No	0	ENSG00000198216	CACNA1E	Intronic	0.830884	0.649608	0.740246	1.27905	0.131588	No	0.673471	5.17191	2.92269	-7.67949	2.21842e-07	Yes
chr1:181554517-181556715:L2a	chr1	181554517	181556715	L2a	-	LINE/L2	L2a	2.73186	1.28134	2.0066	2.13203	0.272654	No	0	ENSG00000198216	CACNA1E	Intronic	0.536393	0.660697	0.598545	-1.23174	0.0952777	No	2.22898	3.1228	2.67589	-1.401	0.476203	No
chr1:181640975-181641529:L1PREC2	chr1	181640975	181641529	L1PREC2	+	LINE/L1	L1PREC2	0.571103	0.911383	0.741243	-1.59583	0.237605	No	0	ENSG00000198216	CACNA1E	Intronic	0.999682	4.46333	2.73151	-4.46475	0.000465972	Yes	0.536704	0.640414	0.588559	-1.19324	0.102343	No
chr1:181695350-181696686:L2a	chr1	181695350	181696686	L2a	-	LINE/L2	L2a	3.75179	1.51103	2.63141	2.48293	0.172968	No	0	ENSG00000198216	CACNA1E	Intronic	0.994155	0.649202	0.821679	1.53135	0.0952777	No	2.17906	3.71978	2.94942	-1.70706	0.24243	No
chr1:181745986-181746172:MER58A	chr1	181745986	181746172	MER58A	+	DNA/hAT-Charlie	MER58A	2.00863	6.93193	4.47028	-3.45108	0.0400331	Yes	0	ENSG00000198216	CACNA1E	Intronic	4.79348	20.9451	12.8693	-4.36949	6.82625e-06	Yes	0.59139	0.642736	0.617063	-1.08682	0.494694	No
chr1:181756935-181757441:L2b	chr1	181756935	181757441	L2b	-	LINE/L2	L2b	2.53775	2.82148	2.67962	-1.1118	0.899458	No	0	ENSG00000198216	CACNA1E	Intronic	0.591128	0.665911	0.62852	-1.12651	0.355467	No	3.97039	13.1789	8.57463	-3.31928	0.00606928	Yes
chr1:182347918-182348216:AluSz	chr1	182347918	182348216	AluSz	-	SINE/Alu	AluSz	10.6253	3.05158	6.83843	3.48189	0.00434622	Yes	2624	ENSG00000135821	GLUL	afterGene	14.3095	2.91809	8.61378	4.90372	0.000141216	Yes	0.536704	0.688885	0.612794	-1.28355	0.102343	No
chr1:182348353-182348657:AluSx1	chr1	182348353	182348657	AluSx1	-	SINE/Alu	AluSx1	10.5699	4.83808	7.70398	2.18473	0.0528226	No	2183	ENSG00000135821	GLUL	afterGene	13.2898	2.83306	8.06142	4.69095	0.000199512	Yes	0.536704	0.640414	0.588559	-1.19324	0.102343	No
chr1:182348685-182348970:AluJb	chr1	182348685	182348970	AluJb	-	SINE/Alu	AluJb	11.0655	3.90802	7.48673	2.83147	0.0339524	Yes	1870	ENSG00000135821	GLUL	afterGene	11.4101	2.5081	6.9591	4.5493	0.000209893	Yes	0.536704	0.64212	0.589412	-1.19642	0.102343	No
chr1:182348982-182349281:AluSp	chr1	182348982	182349281	AluSp	-	SINE/Alu	AluSp	7.6984	3.2083	5.45335	2.39953	0.040316	Yes	1559	ENSG00000135821	GLUL	afterGene	8.9077	2.60818	5.75794	3.4153	0.00392732	Yes	0.536704	0.679822	0.608263	-1.26666	0.102343	No
chr1:182349440-182349730:AluJr	chr1	182349440	182349730	AluJr	-	SINE/Alu	AluJr	7.35358	3.10484	5.22921	2.36842	0.122356	No	1110	ENSG00000135821	GLUL	afterGene	14.6947	2.6859	8.6903	5.47107	0.000142731	Yes	0.592274	0.642394	0.617334	-1.08462	0.509397	No
chr1:182569833-182570570:L2a	chr1	182569833	182570570	L2a	+	LINE/L2	L2a	1.23323	0.638207	0.935718	1.93233	0.155019	No	0	ENSG00000143333	RGS16	Intronic	0.536393	0.64246	0.589426	-1.19774	0.0952777	No	3.46574	3.81016	3.63795	-1.09938	0.843617	No
chr1:182612501-182612671:MER5B	chr1	182612501	182612671	MER5B	-	DNA/hAT-Charlie	MER5B	12.3601	8.45021	10.4052	1.4627	0.489355	No	2569	ENSG00000135824	RGS8	afterGene	23.1563	15.188	19.1721	1.52464	0.404421	No	0.536704	0.64578	0.591242	-1.20323	0.102343	No
chr1:182612690-182612854:MER5A	chr1	182612690	182612854	MER5A	+	DNA/hAT-Charlie	MER5A	14.6012	10.1364	12.3688	1.44046	0.490585	No	2386	ENSG00000135824	RGS8	afterGene	0.582982	0.64951	0.616246	-1.11412	0.35692	No	16.3059	16.2043	16.2551	1.00627	0.992657	No
chr1:183223866-183224797:L1MA9	chr1	183223866	183224797	L1MA9	-	LINE/L1	L1MA9	0.684229	0.995892	0.84006	-1.4555	0.448228	No	0	ENSG00000157064	NMNAT2	Intronic	1.25827	5.42228	3.34028	-4.30929	0.00227994	Yes	0.527349	0.760898	0.644123	-1.44287	0.103216	No
chr1:183323847-183324417:L2c	chr1	183323847	183324417	L2c	+	LINE/L2	L2c	1.12762	0.687034	0.907328	1.64129	0.328896	No	0	ENSG00000157064	NMNAT2	Intronic	0.536393	0.640152	0.588272	-1.19344	0.0952777	No	2.82286	1.8592	2.34103	1.51832	0.351241	No
chr1:183338267-183338392:MIRb	chr1	183338267	183338392	MIRb	-	SINE/MIR	MIRb	0.685568	0.82952	0.757544	-1.20997	0.67872	No	0	ENSG00000157064	NMNAT2	Intronic	1.48397	0.949525	1.21675	1.56286	0.28786	No	0.536704	0.640414	0.588559	-1.19324	0.102343	No
chr1:183361128-183362154:L2a	chr1	183361128	183362154	L2a	+	LINE/L2	L2a	1.33967	0.90232	1.12099	1.48469	0.543677	No	0	ENSG00000157064	NMNAT2	Intronic	0.536393	0.640152	0.588272	-1.19344	0.0952777	No	2.38747	1.52035	1.95391	1.57035	0.377652	No
chr1:183648377-183653565:L1PA7	chr1	183648377	183653565	L1PA7	-	LINE/L1	L1PA7	0.787554	0.506947	0.647251	1.55352	0.141867	No	0	ENSG00000143344	RGL1	Intronic	0.586324	0.642131	0.614228	-1.09518	0.446085	No	0.906036	1.16234	1.03419	-1.28289	0.61781	No
chr1:183671908-183677470:HERVH48-int	chr1	183671908	183677470	MER48|HERVH48-int|HERVH48-int	-	LTR/ERV1	HERVH48-int	7.80325	1.42669	4.61497	5.46949	0.0127733	Yes	0	ENSG00000143344	RGL1	Intronic	0.536393	0.688566	0.612479	-1.2837	0.0952777	No	4.54155	1.98412	3.26284	2.28895	0.102343	No
chr1:184064559-184065022:MLT1B	chr1	184064559	184065022	MLT1B|MLT1B	+	LTR/ERVL-MaLR	MLT1B	17.9355	6.86597	12.4007	2.61223	0.0499241	Yes	21214	ENSG00000198860	TSEN15	Intergenic	14.0846	7.76627	10.9254	1.81356	0.120767	No	0.536704	0.640414	0.588559	-1.19324	0.102343	No
chr1:184632736-184632816:MIRb	chr1	184632736	184632816	MIRb	-	SINE/MIR	MIRb	13.6229	0.661058	7.14199	20.6077	1.01455e-06	Yes	26550	ENSG00000116406	EDEM3	Intergenic	22.8941	1.49488	12.1945	15.315	6.96667e-10	Yes	0.536704	0.642394	0.589549	-1.19693	0.102343	No
chr1:184632892-184633110:MIR	chr1	184632892	184633110	MIR	+	SINE/MIR	MIR	24.7897	1.26471	13.0272	19.6011	2.34689e-06	Yes	26256	ENSG00000116406	EDEM3	Intergenic	0.859828	0.640152	0.74999	1.34316	0.0952777	No	37.0969	2.14564	19.6213	17.2894	1.60307e-10	Yes
chr1:185272427-185272589:L2	chr1	185272427	185272589	L2	+	LINE/L2	L2	2.09552	4.50224	3.29888	-2.1485	0.254911	No	0	ENSG00000116679	IVNS1ABP	Intronic	0.552801	0.844717	0.698759	-1.52807	0.0952777	No	7.73547	40.1665	23.951	-5.19252	5.25749e-05	Yes
chr1:185273327-185273434:L2d2	chr1	185273327	185273434	L2d2	+	LINE/L2	L2d2	1.95367	5.12493	3.5393	-2.62323	0.125231	No	0	ENSG00000116679	IVNS1ABP	Intronic	0.940378	0.695895	0.818137	1.35132	0.240156	No	5.68238	21.6038	13.6431	-3.8019	0.00240585	Yes
chr1:186284551-186285096:L2a	chr1	186284551	186285096	L2a	+	LINE/L2	L2a	1.00496	1.23212	1.11854	-1.22603	0.744102	No	0	ENSG00000047410	TPR	Intronic	0.544596	1.0032	0.773899	-1.8421	0.0120257	No	4.10399	20.882	12.493	-5.08821	4.30204e-06	Yes
chr1:186411069-186411367:AluSz	chr1	186411069	186411367	AluSz	+	SINE/Alu	AluSz	1.06572	0.663421	0.864573	1.60641	0.292988	No	1332	ENSG00000116703	PDC	afterGene	3.7401	2.28768	3.01389	1.63489	0.244436	No	0.536704	0.679822	0.608263	-1.26666	0.102343	No
chr1:186411368-186412087:L2	chr1	186411368	186412087	L2	-	LINE/L2	L2	2.54576	0.759179	1.65247	3.35331	0.0288897	Yes	612	ENSG00000116703	PDC	afterGene	0.596749	0.699704	0.648226	-1.17253	0.294937	No	12.2726	6.95976	9.61618	1.76337	0.102343	No
chr1:186475544-186482006:L1PA7	chr1	186475544	186482006	L1PA7	-	LINE/L1	L1PA7	0.886665	0.931159	0.908912	-1.05018	0.936833	No	-45291	ENSG00000116703	PDC	Intergenic	0.56036	0.715293	0.637826	-1.27649	0.0984305	No	0.889624	1.56602	1.22782	-1.76032	0.173906	No
chr1:18685162-18685373:MIR	chr1	18685162	18685373	MIR	-	SINE/MIR	MIR	0.888378	0.724313	0.806346	1.22651	0.67815	No	0	ENSG00000117154	IGSF21	Intronic	0.536393	0.640152	0.588272	-1.19344	0.0952777	No	4.89066	4.97393	4.9323	-1.01703	0.97316	No
chr1:18685477-18685801:AluJr	chr1	18685477	18685801	AluJr	+	SINE/Alu	AluJr	2.62051	1.14799	1.88425	2.2827	0.143394	No	0	ENSG00000117154	IGSF21	Intronic	7.07437	4.52494	5.79966	1.56342	0.285264	No	0.569472	0.690137	0.629805	-1.21189	0.188458	No
chr1:18686403-18686601:MIR	chr1	18686403	18686601	MIR	+	SINE/MIR	MIR	2.36177	0.955243	1.65851	2.47243	0.123658	No	0	ENSG00000117154	IGSF21	Intronic	3.31666	2.89409	3.10537	1.14601	0.774393	No	0.536704	0.640414	0.588559	-1.19324	0.102343	No
chr1:18687263-18687475:MIRb	chr1	18687263	18687475	MIRb	-	SINE/MIR	MIRb	0.983948	0.651699	0.817824	1.50982	0.376079	No	0	ENSG00000117154	IGSF21	Intronic	0.536393	0.640152	0.588272	-1.19344	0.0952777	No	1.86949	1.01435	1.44192	1.84305	0.187893	No
chr1:18701472-18701820:L2a	chr1	18701472	18701820	L2a	+	LINE/L2	L2a	2.53008	1.50534	2.01771	1.68074	0.512834	No	0	ENSG00000117154	IGSF21	Intronic	19.0339	16.2955	17.6647	1.16805	0.643707	No	0.549355	0.640414	0.594885	-1.16576	0.160281	No
chr1:1882803-1883193:L1ME1	chr1	1882803	1883193	L1ME1	-	LINE/L1	L1ME1	15.632	0.639559	8.1358	24.4419	2.42331e-07	Yes	0	ENSG00000142609	C1orf222	Intronic	48.4594	1.23412	24.8468	39.2664	1.64441e-12	Yes	0.678753	0.640414	0.659583	1.05987	0.721391	No
chr1:190145920-190146280:MLT1I-int	chr1	190145920	190146280	MLT1I-int|MLT1I-int	-	LTR/ERVL-MaLR	MLT1I-int	1.30138	0.731978	1.01668	1.7779	0.247902	No	0	ENSG00000162670	BRINP3	Intronic	1.81756	1.41885	1.61821	1.281	0.55798	No	0.536704	0.640414	0.588559	-1.19324	0.102343	No
chr1:190190381-190194641:L1MA4	chr1	190190381	190194641	L1MA4	+	LINE/L1	L1MA4	3.14677	0.542349	1.84456	5.80211	0.000621316	Yes	0	ENSG00000162670	BRINP3	Intronic	0.536393	0.640152	0.588272	-1.19344	0.0952777	No	3.36852	1.74855	2.55854	1.92646	0.192551	No
chr1:190421707-190422005:AluSx1	chr1	190421707	190422005	AluSx1	+	SINE/Alu	AluSx1	3.34889	2.01117	2.68003	1.66515	0.476779	No	0	ENSG00000162670	BRINP3	Intronic	0.536393	0.640152	0.588272	-1.19344	0.0952777	No	3.85704	7.94448	5.90076	-2.05973	0.102343	No
chr1:190422334-190422646:AluY	chr1	190422334	190422646	AluY	-	SINE/Alu	AluY	1.82576	1.2286	1.52718	1.48605	0.57101	No	0	ENSG00000162670	BRINP3	Intronic	5.42745	5.34722	5.38734	1.01501	0.978525	No	0.536704	0.670152	0.603428	-1.24864	0.102343	No
chr1:193061707-193062044:AluJo	chr1	193061707	193062044	AluJo	+	SINE/Alu	AluJo	24.323	12.3887	18.3558	1.96331	0.047598	No	801	ENSG00000116747	TROVE2	afterGene	0.544596	0.644185	0.59439	-1.18287	0.119049	No	40.1465	11.9682	26.0574	3.35444	0.000215789	Yes
chr1:193062294-193062448:MIRb	chr1	193062294	193062448	MIRb	-	SINE/MIR	MIRb	18.424	7.05047	12.7372	2.61316	0.0141322	Yes	1388	ENSG00000116747	TROVE2	afterGene	11.7172	4.91958	8.31839	2.38175	0.0422555	Yes	0.536704	0.719447	0.628075	-1.34049	0.102343	No
chr1:193062534-193062816:L1MEd	chr1	193062534	193062816	L1MEd	-	LINE/L1	L1MEd	40.2674	20.703	30.4852	1.94501	0.0955549	No	1628	ENSG00000116747	TROVE2	afterGene	25.7931	8.49835	17.1457	3.03507	0.0104494	Yes	0.599167	0.800376	0.699772	-1.33581	0.122147	No
chr1:193063230-193063522:AluSx3	chr1	193063230	193063522	AluSx3	+	SINE/Alu	AluSx3	21.7151	10.2064	15.9607	2.12759	0.0329267	Yes	2077	ENSG00000023572	GLRX2	afterGene	0.553583	0.663074	0.608328	-1.19779	0.119662	No	12.7559	5.21221	8.98406	2.44731	0.0920942	No
chr1:193063523-193063919:LTR83	chr1	193063523	193063919	LTR83	-	LTR/ERVL	LTR83	31.1371	11.7182	21.4276	2.65717	0.00666415	Yes	1680	ENSG00000023572	GLRX2	afterGene	17.0435	6.86512	11.9543	2.48263	0.055603	No	0.549355	0.665277	0.607316	-1.21101	0.102343	No
chr1:193064358-193064659:AluSg4	chr1	193064358	193064659	AluSg4	+	SINE/Alu	AluSg4	11.9199	7.55501	9.73744	1.57774	0.284455	No	940	ENSG00000023572	GLRX2	afterGene	0.757686	0.662291	0.709989	1.14404	0.462656	No	6.17868	2.62945	4.40407	2.34979	0.0807135	No
chr1:193216194-193218596:Tigger1	chr1	193216194	193218596	Tigger1	+	DNA/TcMar-Tigger	Tigger1	4.31982	9.67383	6.99683	-2.2394	0.272308	No	0	ENSG00000134371	CDC73	Intronic	20.6285	98.5052	59.5669	-4.7752	6.12225e-07	Yes	0.549355	0.651721	0.600538	-1.18634	0.125981	No
chr1:193226177-193226720:L2	chr1	193226177	193226720	L2	-	LINE/L2	L2	8.33109	17.0899	12.7105	-2.05134	0.0524466	No	3147	ENSG00000134371	CDC73	afterGene	0.544596	0.796919	0.670757	-1.46332	0.0693684	No	7.0753	13.0827	10.079	-1.84907	0.102343	No
chr1:193228231-193228859:L1MEj	chr1	193228231	193228859	L1MEj	+	LINE/L1	L1MEj	11.0147	20.0502	15.5325	-1.82031	0.129265	No	5201	ENSG00000134371	CDC73	Intergenic	12.8525	18.9128	15.8826	-1.47153	0.288312	No	0.627666	0.743548	0.685607	-1.18462	0.354492	No
chr1:193228942-193229880:L2a	chr1	193228942	193229880	L2a	-	LINE/L2	L2a	14.9157	33.3172	24.1164	-2.2337	0.0133935	Yes	5912	ENSG00000134371	CDC73	Intergenic	0.544596	0.782365	0.66348	-1.4366	0.0636114	No	26.6926	37.3261	32.0093	-1.39837	0.207751	No
chr1:193233288-193234338:L1MD2	chr1	193233288	193234338	L1MD2	-	LINE/L1	L1MD2	14.4223	21.2397	17.831	-1.4727	0.296249	No	10258	ENSG00000134371	CDC73	Intergenic	0.583067	0.640152	0.61161	-1.0979	0.428896	No	22.6183	38.7232	30.6708	-1.71203	0.0495394	No
chr1:193239968-193245478:L1PBa	chr1	193239968	193245478	L1PBa	-	LINE/L1	L1PBa	4.7407	5.71349	5.2271	-1.2052	0.805386	No	16938	ENSG00000134371	CDC73	Intergenic	0.536393	0.659578	0.597985	-1.22965	0.0952777	No	2.80052	5.35209	4.0763	-1.91111	0.142925	No
chr1:1948527-1948826:AluJr	chr1	1948527	1948826	AluJr	+	SINE/Alu	AluJr	1.5644	0.584097	1.07425	2.67833	0.0155527	Yes	-1955	ENSG00000187730	GABRD	Intergenic	0.525895	0.640152	0.583023	-1.21726	0.196391	No	3.72136	0.888593	2.30498	4.18793	0.00406384	Yes
chr1:1949496-1949773:AluSx3	chr1	1949496	1949773	AluSx3	+	SINE/Alu	AluSx3	2.5428	0.554884	1.54884	4.58258	0.000218811	Yes	-1008	ENSG00000187730	GABRD	Intergenic	0.599823	0.640152	0.619988	-1.06724	0.724247	No	3.21856	0.81002	2.01429	3.97343	0.00469245	Yes
chr1:1952171-1952475:MER46C	chr1	1952171	1952475	MER46C	+	DNA/TcMar-Tigger	MER46C	2.88498	0.464848	1.67491	6.20628	6.89164e-06	Yes	0	ENSG00000187730	GABRD	Intronic	7.78909	0.770682	4.27988	10.1067	1.95906e-06	Yes	1.97156	0.670152	1.32086	2.94197	0.00734962	Yes
chr1:19541513-19541809:AluSx	chr1	19541513	19541809	AluSx	+	SINE/Alu	AluSx	37.6052	27.781	32.6931	1.35363	0.401303	No	350	ENSG00000127463	EMC1	afterGene	0.712081	0.688134	0.700107	1.0348	0.858478	No	37.9704	39.2562	38.6133	-1.03386	0.892991	No
chr1:1955238-1955638:MLT1C2	chr1	1955238	1955638	MLT1C2	-	LTR/ERVL-MaLR	MLT1C2	3.81108	0.544011	2.17755	7.00553	0.000249261	Yes	0	ENSG00000187730	GABRD	Intronic	0.544596	0.640152	0.592374	-1.17546	0.127035	No	17.7374	1.50705	9.62221	11.7696	8.73805e-07	Yes
chr1:195716261-195717209:L1MB8	chr1	195716261	195717209	L1MB8	-	LINE/L1	L1MB8	47.7506	0.622421	24.1865	76.7174	2.52421e-09	Yes	477701	ENSG00000162687	KCNT2	Intergenic	113.545	0.6477	57.0964	175.305	1.85317e-23	Yes	0.536704	0.640414	0.588559	-1.19324	0.102343	No
chr1:195717210-195717661:L1MB8	chr1	195717210	195717661	L1MB8	-	LINE/L1	L1MB8	20.1797	0.576078	10.3779	35.0295	4.91906e-08	Yes	477249	ENSG00000162687	KCNT2	Intergenic	26.6981	0.640152	13.6691	41.7059	4.09542e-17	Yes	0.536704	0.640414	0.588559	-1.19324	0.102343	No
chr1:195717932-195718684:L1MB8	chr1	195717932	195718684	L1MB8	-	LINE/L1	L1MB8	25.4769	0.609648	13.0433	41.7895	2.33193e-08	Yes	476226	ENSG00000162687	KCNT2	Intergenic	33.6194	0.643335	17.1314	52.2581	1.59317e-17	Yes	0.536704	0.640414	0.588559	-1.19324	0.102343	No
chr1:195718690-195719586:HAL1M8	chr1	195718690	195719586	HAL1M8	-	LINE/L1	HAL1M8	31.622	0.549638	16.0858	57.5323	5.25716e-09	Yes	475324	ENSG00000162687	KCNT2	Intergenic	34.0243	0.718618	17.3715	47.3469	2.42216e-14	Yes	0.712665	0.640414	0.67654	1.11282	0.478423	No
chr1:195727275-195728375:L1MC3	chr1	195727275	195728375	L1MC3	+	LINE/L1	L1MC3	15.4619	0.504041	7.98297	30.6759	2.33041e-08	Yes	466535	ENSG00000162687	KCNT2	Intergenic	0.536393	0.640152	0.588272	-1.19344	0.0952777	No	16.5632	0.640414	8.60179	25.8632	6.64155e-14	Yes
chr1:1957424-1957934:L1MB5	chr1	1957424	1957934	L1MB5	-	LINE/L1	L1MB5	4.19575	0.464224	2.32999	9.03819	2.53483e-06	Yes	0	ENSG00000187730	GABRD	Intronic	0.604872	0.640152	0.622512	-1.05833	0.655726	No	11.0634	0.757459	5.91042	14.6059	1.00513e-07	Yes
chr1:1958312-1958616:AluJb	chr1	1958312	1958616	AluJb	+	SINE/Alu	AluJb	2.3917	0.464397	1.42805	5.15011	4.60989e-05	Yes	0	ENSG00000187730	GABRD	Intronic	3.84855	0.767782	2.30817	5.01256	0.00174982	Yes	0.553941	0.640414	0.597177	-1.15611	0.188605	No
chr1:19589014-19589310:AluJr	chr1	19589014	19589310	AluJr	+	SINE/Alu	AluJr	4.60975	15.8798	10.2448	-3.44482	0.0055348	Yes	2393	ENSG00000053372	MRTO4	afterGene	8.04387	15.934	11.9889	-1.98088	0.026751	No	0.775147	1.26448	1.01981	-1.63128	0.156172	No
chr1:19619522-19620066:L1MEc	chr1	19619522	19620066	L1MEc	+	LINE/L1	L1MEc	12.117	7.25936	9.68818	1.66916	0.210683	No	-3779	ENSG00000162482	AKR7A3	Intergenic	0.536393	0.649422	0.592908	-1.21072	0.0952777	No	25.3996	31.0698	28.2347	-1.22324	0.45863	No
chr1:19620766-19622711:HUERS-P3-int	chr1	19620766	19622711	HUERS-P3-int|HUERS-P3-int|HUERS-P3-int|LTR9D|LTR9D	-	LTR/ERV1	HUERS-P3-int	160.068	106.363	133.216	1.50492	0.176754	No	-5023	ENSG00000162482	AKR7A3	Intergenic	176.321	213.819	195.07	-1.21267	0.202708	No	0.60508	0.842918	0.723999	-1.39307	0.102343	No
chr1:19622712-19623025:AluSq	chr1	19622712	19623025	AluSq	-	SINE/Alu	AluSq	13.4864	7.75195	10.6192	1.73974	0.191963	No	-6969	ENSG00000162482	AKR7A3	Intergenic	6.63401	10.3306	8.48228	-1.55721	0.163556	No	0.536704	0.642394	0.589549	-1.19693	0.102343	No
chr1:19623026-19623329:LTR9D	chr1	19623026	19623329	LTR9D	-	LTR/ERV1	LTR9D	28.4259	15.5932	22.0095	1.82296	0.104784	No	7131	ENSG00000053371	AKR7A2	Intergenic	19.3917	26.4867	22.9392	-1.36588	0.181124	No	0.536704	0.697706	0.617205	-1.29998	0.102343	No
chr1:19624435-19624939:MLT2A2	chr1	19624435	19624939	MLT2A2	+	LTR/ERVL	MLT2A2	22.1728	22.2925	22.2327	-1.0054	0.991918	No	5521	ENSG00000053371	AKR7A2	Intergenic	0.72376	0.646524	0.685142	1.11946	0.447636	No	18.1176	22.9684	20.543	-1.26774	0.484172	No
chr1:19626746-19627037:MLT1G3	chr1	19626746	19627037	MLT1G3	+	LTR/ERVL-MaLR	MLT1G3	19.9774	11.0901	15.5337	1.80138	0.229868	No	3423	ENSG00000053371	AKR7A2	afterGene	0.536393	0.661519	0.598956	-1.23327	0.0952777	No	10.9218	14.1393	12.5306	-1.29459	0.412261	No
chr1:19627059-19627530:L1MB8	chr1	19627059	19627530	L1MB8	-	LINE/L1	L1MB8	7.79626	12.3449	10.0706	-1.58344	0.266672	No	2930	ENSG00000053371	AKR7A2	afterGene	12.6196	13.2419	12.9308	-1.04931	0.891282	No	0.544896	0.729804	0.63735	-1.33935	0.0827872	No
chr1:19627833-19628171:L1MB8	chr1	19627833	19628171	L1MB8	-	LINE/L1	L1MB8	11.7142	8.93396	10.3241	1.3112	0.614905	No	2289	ENSG00000053371	AKR7A2	afterGene	14.0815	9.13681	11.6092	1.54118	0.164111	No	0.536704	0.690137	0.61342	-1.28588	0.102343	No
chr1:19628172-19628483:AluJb	chr1	19628172	19628483	AluJb	-	SINE/Alu	AluJb	4.9969	4.59231	4.7946	1.0881	0.895827	No	1977	ENSG00000053371	AKR7A2	afterGene	3.41575	3.99332	3.70453	-1.16909	0.676117	No	0.536704	0.64212	0.589412	-1.19642	0.102343	No
chr1:19628484-19629181:L1MB8	chr1	19628484	19629181	L1MB8	-	LINE/L1	L1MB8	20.632	18.8513	19.7416	1.09446	0.840419	No	1279	ENSG00000053371	AKR7A2	afterGene	26.1857	21.6497	23.9177	1.20951	0.484804	No	0.599167	0.644613	0.62189	-1.07585	0.559076	No
chr1:197329745-197332701:L1MD1	chr1	197329745	197332701	L1MD1	-	LINE/L1	L1MD1	4.25021	5.46076	4.85549	-1.28482	0.711374	No	0	ENSG00000134376	CRB1	Intronic	0.536393	0.642131	0.589262	-1.19713	0.0952777	No	7.74056	11.6549	9.69772	-1.50569	0.287775	No
chr1:197393273-197394042:L3	chr1	197393273	197394042	L3	-	LINE/CR1	L3	3.03689	5.97638	4.50664	-1.96792	0.37214	No	0	ENSG00000134376	CRB1	Intronic	0.536393	0.640152	0.588272	-1.19344	0.0952777	No	5.97129	13.9085	9.93989	-2.32922	0.102343	No
chr1:197548375-197549198:L1MEd	chr1	197548375	197549198	L1MEd	-	LINE/L1	L1MEd	0.571122	0.978591	0.774856	-1.71345	0.207978	No	0	ENSG00000213047	DENND1B	Intronic	4.81571	6.40051	5.60811	-1.32909	0.541603	No	0.77684	1.01926	0.898053	-1.31206	0.320904	No
chr1:198840465-198841388:L1PA5	chr1	198840465	198841388	L1PA5	-	LINE/L1	L1PA5	0.819612	0.732245	0.775929	1.11932	0.822137	No	113921	ENSG00000081237	PTPRC	Intergenic	7.0073	5.73041	6.36885	1.22283	0.602961	No	0.544896	0.670152	0.607524	-1.22987	0.102343	No
chr1:20006254-20006417:MER5A1	chr1	20006254	20006417	MER5A1	+	DNA/hAT-Charlie	MER5A1	27.1001	2.27922	14.6897	11.8901	6.30103e-05	Yes	200	ENSG00000158748	HTR6	afterGene	31.3358	2.37253	16.8542	13.2078	2.06684e-08	Yes	0.605632	0.640414	0.623023	-1.05743	0.678472	No
chr1:20006496-20006719:MIRb	chr1	20006496	20006719	MIRb	+	SINE/MIR	MIRb	32.245	4.92243	18.5837	6.55064	0.000272143	Yes	442	ENSG00000158748	HTR6	afterGene	31.3654	2.40329	16.8844	13.051	9.71522e-09	Yes	0.536704	0.640414	0.588559	-1.19324	0.102343	No
chr1:200936047-200936169:MLT1N2	chr1	200936047	200936169	MLT1N2	-	LTR/ERVL-MaLR	MLT1N2	0.896974	1.3444	1.12069	-1.49882	0.5106	No	2352	ENSG00000116852	KIF21B	afterGene	2.35608	5.20105	3.77857	-2.2075	0.0793533	No	0.536704	0.640414	0.588559	-1.19324	0.102343	No
chr1:200936460-200936575:MIR3	chr1	200936460	200936575	MIR3	+	SINE/MIR	MIR3	1.07719	2.5977	1.83744	-2.41155	0.170147	No	1946	ENSG00000116852	KIF21B	afterGene	0.536393	0.64246	0.589426	-1.19774	0.0952777	No	6.70644	15.1303	10.9184	-2.25608	0.0138258	Yes
chr1:200965945-200966590:L2a	chr1	200965945	200966590	L2a	+	LINE/L2	L2a	3.44762	1.99672	2.72217	1.72664	0.456689	No	0	ENSG00000116852	KIF21B	Intronic	0.536393	0.796827	0.66661	-1.48553	0.0540164	No	7.77238	16.8046	12.2885	-2.16209	0.0351801	Yes
chr1:201088517-201088724:MamGypLTR3	chr1	201088517	201088724	MamGypLTR3	+	LTR/Gypsy	MamGypLTR3	4.46264	1.7425	3.10257	2.56106	0.193247	No	0	ENSG00000232237	ASCL5	Intronic	18.0304	6.85796	12.4442	2.62912	0.0286646	Yes	0.553941	0.648157	0.601049	-1.17008	0.157575	No
chr1:201484408-201485133:LTR8	chr1	201484408	201485133	LTR8	-	LTR/ERV1	LTR8	9.77872	1.26006	5.51939	7.76054	0.000569216	Yes	-5825	ENSG00000159176	CSRP1	Intergenic	0.662854	0.64246	0.652657	1.03174	0.836043	No	5.61951	1.42591	3.52271	3.94101	0.00647041	Yes
chr1:201611920-201612201:AluY	chr1	201611920	201612201	AluY	-	SINE/Alu	AluY	1.77854	1.43676	1.60765	1.23788	0.751445	No	0	ENSG00000134369	NAV1	Intronic	3.46002	6.12497	4.79249	-1.77021	0.0952777	No	1.10454	1.28805	1.19629	-1.16614	0.674339	No
chr1:201702658-201703226:L2a	chr1	201702658	201703226	L2a	-	LINE/L2	L2a	3.56917	1.04384	2.30651	3.41927	0.0307264	Yes	0	ENSG00000134369	NAV1	Intronic	0.56583	0.751353	0.658592	-1.32788	0.0952777	No	3.65103	3.91509	3.78306	-1.07233	0.869434	No
chr1:201703254-201703559:AluJr	chr1	201703254	201703559	AluJr	+	SINE/Alu	AluJr	1.16909	0.581914	0.875503	2.00905	0.0886172	No	0	ENSG00000134369	NAV1	Intronic	2.55606	2.09984	2.32795	1.21726	0.644476	No	0.560789	0.660366	0.610578	-1.17757	0.175327	No
chr1:201771627-201771935:AluSg7	chr1	201771627	201771935	AluSg7	+	SINE/Alu	AluSg7	0.976017	0.978013	0.977015	-1.00205	0.997433	No	0	ENSG00000134369	NAV1	Intronic	1.56203	4.75978	3.1609	-3.04718	0.0177031	Yes	0.553941	0.687336	0.620639	-1.24081	0.135017	No
chr1:201861751-201861852:MIRb	chr1	201861751	201861852	MIRb	+	SINE/MIR	MIRb	27.1826	3.45963	15.3211	7.85709	0.000468798	Yes	318	ENSG00000198892	SHISA4	afterGene	67.0695	4.12218	35.5958	16.2704	3.59923e-10	Yes	0.544896	0.640414	0.592655	-1.1753	0.135017	No
chr1:201861853-201862177:AluSx1	chr1	201861853	201862177	AluSx1	+	SINE/Alu	AluSx1	36.9368	4.58808	20.7624	8.05061	0.000257021	Yes	420	ENSG00000198892	SHISA4	afterGene	60.3876	7.46219	33.9249	8.09248	3.68565e-08	Yes	0.549355	0.640414	0.594885	-1.16576	0.160281	No
chr1:201869952-201870215:L3b	chr1	201869952	201870215	L3b	+	LINE/CR1	L3b	7.99174	0.714058	4.3529	11.192	0.000119048	Yes	0	ENSG00000163431	LMOD1	Intronic	17.6909	2.06724	9.87906	8.55772	2.15741e-06	Yes	0.643288	0.640414	0.641851	1.00449	0.978341	No
chr1:202845471-202845750:L1MEg	chr1	202845471	202845750	L1MEg	-	LINE/L1	L1MEg	10.8888	8.876	9.88238	1.22676	0.711374	No	2336	ENSG00000183155	RABIF	afterGene	21.0152	11.2926	16.1539	1.86097	0.0531339	No	1.13836	0.888491	1.01343	1.28123	0.40542	No
chr1:202846899-202847666:L1MEg	chr1	202846899	202847666	L1MEg	-	LINE/L1	L1MEg	44.1933	34.3208	39.2571	1.28765	0.474711	No	420	ENSG00000183155	RABIF	afterGene	36.4394	34.6869	35.5631	1.05052	0.851098	No	6.84453	3.47975	5.16214	1.96696	0.108406	No
chr1:203015958-203016183:X7B_LINE	chr1	203015958	203016183	X7B_LINE	+	LINE/CR1	X7B_LINE	5.5673	4.1493	4.8583	1.34174	0.723566	No	0	ENSG00000143847	PPFIA4	Intronic	20.617	11.3321	15.9745	1.81934	0.0952777	No	0.549355	0.648157	0.598756	-1.17985	0.135017	No
chr1:203016338-203016482:MIR3	chr1	203016338	203016482	MIR3	+	SINE/MIR	MIR3	6.9311	5.15987	6.04548	1.34327	0.735937	No	0	ENSG00000143847	PPFIA4	Intronic	14.3238	9.41921	11.8715	1.5207	0.275763	No	0.553941	0.640414	0.597177	-1.15611	0.188605	No
chr1:203016520-203016751:Plat_L3	chr1	203016520	203016751	Plat_L3	+	LINE/CR1	Plat_L3	7.98532	6.68445	7.33488	1.19461	0.820345	No	0	ENSG00000143847	PPFIA4	Intronic	28.5975	13.064	20.8308	2.18903	0.0712701	No	0.553941	0.642394	0.598168	-1.15968	0.179539	No
chr1:203016777-203016996:MIR	chr1	203016777	203016996	MIR	-	SINE/MIR	MIR	9.33361	6.31443	7.82402	1.47814	0.578315	No	0	ENSG00000143847	PPFIA4	Intronic	0.558915	0.642733	0.600824	-1.14997	0.20195	No	31.3035	15.0432	23.1733	2.0809	0.083657	No
chr1:203018206-203018315:MIRb	chr1	203018206	203018315	MIRb	-	SINE/MIR	MIRb	0.887169	0.702386	0.794777	1.26308	0.658888	No	0	ENSG00000143847	PPFIA4	Intronic	0.544596	0.640152	0.592374	-1.17546	0.127035	No	2.7674	2.31656	2.54198	1.19461	0.733366	No
chr1:203018998-203019093:MIR1_Amn	chr1	203018998	203019093	MIR1_Amn	-	SINE/MIR	MIR1_Amn	1.35934	0.764005	1.06167	1.77924	0.299356	No	0	ENSG00000143847	PPFIA4	Intronic	0.536393	0.640152	0.588272	-1.19344	0.0952777	No	2.19167	1.46313	1.8274	1.49793	0.408614	No
chr1:203022093-203022325:MIR	chr1	203022093	203022325	MIR	-	SINE/MIR	MIR	4.28995	0.8908	2.59037	4.81584	0.00749075	Yes	0	ENSG00000143847	PPFIA4	Intronic	0.548921	0.640152	0.594536	-1.1662	0.151277	No	13.6269	3.52578	8.57632	3.86492	0.0085289	Yes
chr1:203022380-203022688:AluSz	chr1	203022380	203022688	AluSz	+	SINE/Alu	AluSz	1.45587	0.636828	1.04635	2.28612	0.105566	No	0	ENSG00000143847	PPFIA4	Intronic	12.6063	4.89865	8.75248	2.57343	0.0602628	No	0.56638	0.640414	0.603397	-1.13071	0.363031	No
chr1:203026174-203026399:L3	chr1	203026174	203026399	L3	+	LINE/CR1	L3	1.70279	0.764606	1.2337	2.22701	0.0884219	No	0	ENSG00000143847	PPFIA4	Intronic	3.09401	2.27869	2.68635	1.3578	0.507055	No	0.536704	0.642394	0.589549	-1.19693	0.102343	No
chr1:203026731-203027147:L2c	chr1	203026731	203027147	L2c	-	LINE/L2	L2c	2.3585	0.576896	1.4677	4.08825	0.00402213	Yes	0	ENSG00000143847	PPFIA4	Intronic	0.672631	0.661569	0.6671	1.01672	0.923102	No	8.05503	3.49696	5.77599	2.30343	0.0994949	No
chr1:203031156-203031310:L2a	chr1	203031156	203031310	L2a	-	LINE/L2	L2a	1.42482	0.753328	1.08908	1.89137	0.193907	No	0	ENSG00000143847	PPFIA4	Intronic	0.607756	0.640152	0.623954	-1.0533	0.697579	No	12.7666	5.58924	9.17793	2.28414	0.102343	No
chr1:203035913-203036444:L2a	chr1	203035913	203036444	L2a	-	LINE/L2	L2a	1.89868	0.636872	1.26778	2.98126	0.0105203	Yes	0	ENSG00000143847	PPFIA4	Intronic	0.570656	0.718841	0.644748	-1.25967	0.168268	No	3.08103	1.87174	2.47638	1.64608	0.276458	No
chr1:203042220-203042439:MIRb	chr1	203042220	203042439	MIRb	-	SINE/MIR	MIRb	1.47529	1.04411	1.2597	1.41296	0.619532	No	0	ENSG00000143847	PPFIA4	Intronic	0.640754	0.64246	0.641607	-1.00266	0.990276	No	5.27363	7.36	6.31682	-1.39562	0.401993	No
chr1:203043066-203043268:L2a	chr1	203043066	203043268	L2a	-	LINE/L2	L2a	1.93663	0.714396	1.32551	2.71086	0.0486847	Yes	0	ENSG00000143847	PPFIA4	Intronic	0.709295	0.642733	0.676014	1.10356	0.541803	No	5.22445	6.7484	5.98642	-1.2917	0.565563	No
chr1:203043269-203043597:Tigger3a	chr1	203043269	203043597	Tigger3a	-	DNA/TcMar-Tigger	Tigger3a	1.06867	0.835247	0.951957	1.27946	0.622148	No	0	ENSG00000143847	PPFIA4	Intronic	0.544596	0.656277	0.600437	-1.20507	0.0961323	No	5.60863	9.99082	7.79972	-1.78133	0.160281	No
chr1:203044073-203044244:MIRc	chr1	203044073	203044244	MIRc	-	SINE/MIR	MIRc	2.40631	1.22688	1.81659	1.96132	0.289025	No	0	ENSG00000143847	PPFIA4	Intronic	0.536393	0.694642	0.615517	-1.29503	0.0952777	No	7.56172	7.44225	7.50199	1.01605	0.972613	No
chr1:203077145-203079813:L1PA17	chr1	203077145	203079813	L1PA17	+	LINE/L1	L1PA17	0.681977	0.555559	0.618768	1.22755	0.479061	No	0	ENSG00000163485	ADORA1	Intronic	0.919358	1.31888	1.11912	-1.43456	0.428896	No	1.10022	0.783518	0.941868	1.4042	0.332042	No
chr1:204193135-204193375:MamRep434	chr1	204193135	204193375	MamRep434	-	DNA/TcMar-Tigger	MamRep434	3.15769	1.45959	2.30864	2.16341	0.289678	No	0	ENSG00000143850	PLEKHA6	Intronic	11.5423	26.9223	19.2323	-2.3325	0.0169163	Yes	0.536704	0.664389	0.600546	-1.23791	0.102343	No
chr1:204193951-204194511:Tigger15a	chr1	204193951	204194511	Tigger15a	+	DNA/TcMar-Tigger	Tigger15a	6.30622	1.48238	3.8943	4.25412	0.0237599	Yes	0	ENSG00000143850	PLEKHA6	Intronic	0.659033	0.640152	0.649592	1.02949	0.853104	No	15.0402	31.722	23.3811	-2.10914	0.059668	No
chr1:204196818-204196965:L2c	chr1	204196818	204196965	L2c	+	LINE/L2	L2c	1.71378	1.33357	1.52368	1.2851	0.744987	No	0	ENSG00000143850	PLEKHA6	Intronic	0.553583	0.640152	0.596867	-1.15638	0.179605	No	3.52187	5.96318	4.74253	-1.69318	0.213772	No
chr1:204203701-204210301:HERVL-int	chr1	204203701	204210301	MLT2A1|MLT2A1|HERVL-int|MLT2A1	+	LTR/ERVL	HERVL-int	5.35904	1.14279	3.25092	4.68944	0.0341651	Yes	0	ENSG00000143850	PLEKHA6	Intronic	0.544596	0.690787	0.617691	-1.26844	0.0952777	No	15.091	9.52865	12.3098	1.58375	0.330695	No
chr1:204282249-204282346:AluJr	chr1	204282249	204282346	AluJr	-	SINE/Alu	AluJr	1.28756	0.464121	0.875842	2.7742	0.00108622	Yes	0	ENSG00000143850	PLEKHA6	Intronic	3.35321	1.63618	2.4947	2.04941	0.129097	No	0.536704	0.640414	0.588559	-1.19324	0.102343	No
chr1:204362517-204365353:L1MD3	chr1	204362517	204365353	L1MD3	+	LINE/L1	L1MD3	1.81808	3.71171	2.76489	-2.04156	0.21588	No	7163	ENSG00000158615	PPP1R15B	Intergenic	0.672631	0.643335	0.657983	1.04554	0.767933	No	8.87334	15.748	12.3107	-1.77475	0.0820543	No
chr1:204443418-204444340:L2	chr1	204443418	204444340	L2	+	LINE/L2	L2	3.33416	1.17542	2.25479	2.83656	0.101272	No	0	ENSG00000133056	PIK3C2B	Intronic	0.718837	0.716931	0.717884	1.00266	0.992554	No	7.47224	6.71887	7.09555	1.11213	0.779325	No
chr1:204639204-204640523:L2c	chr1	204639204	204640523	L2c	-	LINE/L2	L2c	4.16809	2.06239	3.11524	2.021	0.428027	No	0	ENSG00000170382	LRRN2	Intronic	5.56775	2.72832	4.14804	2.04072	0.13147	No	0.641285	0.640414	0.640849	1.00136	0.993293	No
chr1:204640889-204641189:L2c	chr1	204640889	204641189	L2c	-	LINE/L2	L2c	1.32694	0.889392	1.10817	1.49196	0.46698	No	0	ENSG00000170382	LRRN2	Intronic	5.46294	1.71969	3.59131	3.17671	0.0278636	Yes	0.678753	0.640414	0.659583	1.05987	0.699154	No
chr1:204975359-204975585:L2d	chr1	204975359	204975585	L2d	-	LINE/L2	L2d	7.75344	2.69788	5.22566	2.8739	0.151389	No	0	ENSG00000163531	NFASC	Intronic	0.676785	0.772246	0.724515	-1.14105	0.5919	No	16.9004	22.9156	19.908	-1.35593	0.401732	No
chr1:204976631-204977099:L2a	chr1	204976631	204977099	L2a	-	LINE/L2	L2a	11.8967	5.80095	8.8488	2.05081	0.284424	No	0	ENSG00000163531	NFASC	Intronic	0.591445	0.877705	0.734575	-1.484	0.170356	No	21.7446	23.3943	22.5695	-1.07587	0.82945	No
chr1:205032472-205032785:AluSx	chr1	205032472	205032785	AluSx	+	SINE/Alu	AluSx	4.60537	0.508058	2.55672	9.06466	1.69811e-05	Yes	0	ENSG00000184144	CNTN2	Intronic	4.28398	3.92367	4.10382	1.09183	0.848772	No	0.553941	0.689639	0.62179	-1.24497	0.156272	No
chr1:205032786-205033372:L2a	chr1	205032786	205033372	L2a	-	LINE/L2	L2a	6.96956	1.26371	4.11663	5.51516	0.00690193	Yes	0	ENSG00000184144	CNTN2	Intronic	0.609832	0.769514	0.689673	-1.26184	0.197006	No	15.5374	6.52513	11.0313	2.38116	0.0621482	No
chr1:205053723-205054020:AluJb	chr1	205053723	205054020	AluJb	-	SINE/Alu	AluJb	16.7234	26.0262	21.3748	-1.55628	0.173635	No	-79	ENSG00000174529	TMEM81	Intergenic	18.2235	18.3675	18.2955	-1.0079	0.981439	No	0.610037	0.675119	0.642578	-1.10669	0.514803	No
chr1:205212541-205214190:L2	chr1	205212541	205214190	L2	-	LINE/L2	L2	5.67333	0.839952	3.25664	6.75435	0.00327258	Yes	0	ENSG00000133069	TMCC2	Intronic	0.625718	0.688566	0.657142	-1.10044	0.54046	No	2.80326	2.63735	2.72031	1.06291	0.906382	No
chr1:205301050-205301483:MLT1C2	chr1	205301050	205301483	MLT1C2	+	LTR/ERVL-MaLR	MLT1C2	1.60716	6.19096	3.89906	-3.85212	0.0173278	Yes	3738	ENSG00000162873	KLHDC8A	afterGene	0.544596	0.654642	0.599619	-1.20207	0.0992795	No	2.29215	13.829	8.06056	-6.03318	2.78076e-06	Yes
chr1:205314284-205314385:MIRb	chr1	205314284	205314385	MIRb	+	SINE/MIR	MIRb	0.570326	1.28177	0.92605	-2.24744	0.254588	No	0	ENSG00000162873	KLHDC8A	Intronic	0.536393	0.64246	0.589426	-1.19774	0.0952777	No	1.5461	18.0336	9.78986	-11.6639	2.21152e-09	Yes
chr1:205314921-205315175:AluSx	chr1	205314921	205315175	AluSx	+	SINE/Alu	AluSx	1.34901	2.4157	1.88235	-1.79072	0.488784	No	0	ENSG00000162873	KLHDC8A	Intronic	0.583067	0.709644	0.646356	-1.21709	0.220346	No	1.4223	23.9853	12.7038	-16.8638	3.12391e-10	Yes
chr1:205315647-205315873:MIRc	chr1	205315647	205315873	MIRc	-	SINE/MIR	MIRc	0.828226	2.05086	1.43955	-2.47621	0.234867	No	0	ENSG00000162873	KLHDC8A	Intronic	1.6192	24.6459	13.1326	-15.221	2.66166e-11	Yes	0.536704	0.640414	0.588559	-1.19324	0.102343	No
chr1:205316420-205316505:Plat_L3	chr1	205316420	205316505	Plat_L3	-	LINE/CR1	Plat_L3	0.570251	1.31645	0.943352	-2.30855	0.220338	No	0	ENSG00000162873	KLHDC8A	Intronic	1.279	16.7743	9.02665	-13.1152	3.30916e-10	Yes	0.56344	0.640414	0.601927	-1.13662	0.257088	No
chr1:205316567-205316854:AluJr	chr1	205316567	205316854	AluJr	+	SINE/Alu	AluJr	0.572108	2.18713	1.37962	-3.82293	0.0738826	No	0	ENSG00000162873	KLHDC8A	Intronic	0.544596	0.640152	0.592374	-1.17546	0.127035	No	2.17145	27.6199	14.8957	-12.7195	6.78759e-11	Yes
chr1:205322268-205322608:MER58B	chr1	205322268	205322608	MER58B	+	DNA/hAT-Charlie	MER58B	1.14355	1.36492	1.25424	-1.19358	0.837287	No	0	ENSG00000162873	KLHDC8A	Intronic	0.544596	0.642131	0.593363	-1.1791	0.124364	No	0.799276	8.44843	4.62385	-10.5701	1.75612e-08	Yes
chr1:205322893-205323133:MIRb	chr1	205322893	205323133	MIRb	-	SINE/MIR	MIRb	0.984376	1.56511	1.27474	-1.58995	0.534633	No	0	ENSG00000162873	KLHDC8A	Intronic	0.906075	5.61044	3.25826	-6.19202	3.64649e-05	Yes	0.536704	0.644613	0.590658	-1.20106	0.102343	No
chr1:205324088-205324244:MIRc	chr1	205324088	205324244	MIRc	-	SINE/MIR	MIRc	0.681493	1.41532	1.04841	-2.0768	0.296478	No	0	ENSG00000162873	KLHDC8A	Intronic	0.772542	5.4565	3.11452	-7.06305	6.6035e-06	Yes	0.536704	0.640414	0.588559	-1.19324	0.102343	No
chr1:205324366-205324582:L2d2	chr1	205324366	205324582	L2d2	+	LINE/L2	L2d2	0.684537	1.47336	1.07895	-2.15234	0.273525	No	0	ENSG00000162873	KLHDC8A	Intronic	0.544596	0.707341	0.625969	-1.29884	0.0952777	No	1.28254	5.5916	3.43707	-4.35979	0.00156848	Yes
chr1:205325067-205325332:L1PA17	chr1	205325067	205325332	L1PA17	-	LINE/L1	L1PA17	0.684137	1.67923	1.18168	-2.45453	0.155197	No	0	ENSG00000162873	KLHDC8A	Intronic	0.596944	5.99637	3.29666	-10.0451	3.9329e-08	Yes	0.536704	0.640414	0.588559	-1.19324	0.102343	No
chr1:205411991-205412135:MIR3	chr1	205411991	205412135	MIR3	+	SINE/MIR	MIR3	2.59241	3.19743	2.89492	-1.23338	0.820472	No	0	ENSG00000186007	LEMD1	Intronic	0.553583	0.642131	0.597857	-1.15995	0.170731	No	5.73125	54.3152	30.0232	-9.47702	2.37048e-12	Yes
chr1:205427219-205427635:L2b	chr1	205427219	205427635	L2b	-	LINE/L2	L2b	2.38329	23.2432	12.8132	-9.75257	7.14618e-06	Yes	-2138	ENSG00000186007	LEMD1	Intergenic	0.551613	0.695844	0.623729	-1.26147	0.0998797	No	3.01528	29.8552	16.4352	-9.90128	2.59703e-11	Yes
chr1:205476478-205476791:AluY	chr1	205476478	205476791	AluY	+	SINE/Alu	AluY	2.13447	0.463742	1.29911	4.60271	0.000148492	Yes	0	ENSG00000117266	CDK18	Intronic	4.23668	1.15667	2.69668	3.66283	0.040911	Yes	0.536704	0.640414	0.588559	-1.19324	0.102343	No
chr1:205481217-205481532:L2	chr1	205481217	205481532	L2	-	LINE/L2	L2	2.21213	0.52796	1.37004	4.18996	0.0019975	Yes	0	ENSG00000117266	CDK18	Intronic	0.623357	0.689199	0.656278	-1.10563	0.533635	No	6.90808	1.10895	4.00851	6.22941	0.000145379	Yes
chr1:205482124-205482432:L3b	chr1	205482124	205482432	L3b	+	LINE/CR1	L3b	2.45915	0.6168	1.53797	3.98695	0.0101674	Yes	0	ENSG00000117266	CDK18	Intronic	3.58826	1.21915	2.40371	2.94324	0.0263818	Yes	0.583239	0.640414	0.611826	-1.09803	0.433051	No
chr1:205483840-205484225:L2b	chr1	205483840	205484225	L2b	-	LINE/L2	L2b	2.97486	0.507109	1.74098	5.8663	0.000464193	Yes	0	ENSG00000117266	CDK18	Intronic	0.583067	0.640152	0.61161	-1.0979	0.428896	No	5.50446	1.17723	3.34085	4.67578	0.00147619	Yes
chr1:205486570-205487518:L2a	chr1	205486570	205487518	L2a	+	LINE/L2	L2a	7.89751	0.646751	4.27213	12.211	0.00036809	Yes	0	ENSG00000117266	CDK18	Intronic	12.8064	2.1779	7.49216	5.88018	0.000169424	Yes	0.536704	0.640414	0.588559	-1.19324	0.102343	No
chr1:205523525-205524099:L1MB7	chr1	205523525	205524099	L1MB7	+	LINE/L1	L1MB7	12.2107	0.732099	6.4714	16.679	7.18055e-06	Yes	-13915	ENSG00000174514	MFSD4	Intergenic	1.12123	0.666186	0.893707	1.68306	0.0952777	No	50.2591	1.51017	25.8846	33.2805	6.49936e-10	Yes
chr1:205524118-205524497:MSTA	chr1	205524118	205524497	MSTA	-	LTR/ERVL-MaLR	MSTA	28.7069	1.36698	15.0369	21.0002	3.04923e-06	Yes	-13517	ENSG00000174514	MFSD4	Intergenic	64.7068	1.37731	33.0421	46.9806	1.01396e-12	Yes	0.85495	0.640414	0.747682	1.335	0.119725	No
chr1:205524498-205524924:L4_A_Mam	chr1	205524498	205524924	L4_A_Mam	-	LINE/RTE-X	L4_A_Mam	41.6452	0.979741	21.3125	42.5064	6.18501e-07	Yes	-13090	ENSG00000174514	MFSD4	Intergenic	82.7933	1.65141	42.2223	50.1351	1.08345e-11	Yes	0.61922	0.662688	0.640954	-1.0702	0.718668	No
chr1:205525196-205525466:L2b	chr1	205525196	205525466	L2b	-	LINE/L2	L2b	21.3633	0.97653	11.1699	21.8767	4.95417e-06	Yes	-12548	ENSG00000174514	MFSD4	Intergenic	31.6068	1.21207	16.4095	26.0768	5.22003e-09	Yes	0.609723	0.640414	0.625069	-1.05034	0.714452	No
chr1:205826692-205831867:HERVK14-int	chr1	205826692	205831867	LTR14B|HERVK14-int|HERVK14-int|HERVK14-int	+	LTR/ERVK	HERVK14-int	2.31353	1.50757	1.91055	1.53461	0.644338	No	-7433	ENSG00000162877	PM20D1	Intergenic	5.25703	8.05262	6.65482	-1.53178	0.486567	No	0.536704	0.756366	0.646535	-1.40928	0.0961546	No
chr1:205837058-205840622:HERV17-int	chr1	205837058	205840622	HERV17-int|HERV17-int	-	LTR/ERV1	HERV17-int	1.80889	0.819186	1.31404	2.20815	0.280088	No	-17799	ENSG00000162877	PM20D1	Intergenic	0.544596	0.642131	0.593363	-1.1791	0.124364	No	2.92511	3.39963	3.16237	-1.16222	0.816239	No
chr1:205840874-205844220:HERVH-int	chr1	205840874	205844220	HERVH-int|HERVH-int|HERVH-int|HERVH-int|HERVH-int|LTR7B	+	LTR/ERV1	HERVH-int	3.76359	0.814394	2.28899	4.62134	0.0171755	Yes	-21615	ENSG00000162877	PM20D1	Intergenic	3.70718	4.40801	4.05759	-1.18905	0.760202	No	0.557284	0.643668	0.600476	-1.15501	0.194155	No
chr1:205847014-205849263:L1MA4A	chr1	205847014	205849263	L1MA4A	-	LINE/L1	L1MA4A	1.30227	0.737762	1.02002	1.76517	0.364923	No	-27755	ENSG00000162877	PM20D1	Intergenic	0.536393	0.656127	0.59626	-1.22322	0.0952777	No	2.05004	2.21384	2.13194	-1.0799	0.905337	No
chr1:205850860-205853539:L1MA5A	chr1	205850860	205853539	L1MA5A	-	LINE/L1	L1MA5A	1.4568	0.643324	1.05006	2.26449	0.0922296	No	28638	ENSG00000174502	SLC26A9	Intergenic	0.544596	0.640152	0.592374	-1.17546	0.127035	No	2.88882	3.85302	3.37092	-1.33377	0.620603	No
chr1:205853701-205859552:HERVH-int	chr1	205853701	205859552	LTR7B|HERVH-int|HERVH-int|HERVH-int|HERVH-int|LTR7B	-	LTR/ERV1	HERVH-int	8.76058	1.08743	4.924	8.05626	0.0150414	Yes	22625	ENSG00000174502	SLC26A9	Intergenic	0.609462	0.720166	0.664814	-1.18164	0.372656	No	21.6298	15.0639	18.3468	1.43587	0.570331	No
chr1:205859819-205865288:HERVK9-int	chr1	205859819	205865288	MER9a2|HERVK9-int|HERVK9-int|HERVK9-int|MER9a2	+	LTR/ERVK	HERVK9-int	31.9691	14.9888	23.4789	2.13286	0.526437	No	16889	ENSG00000174502	SLC26A9	Intergenic	104.964	65.532	85.2479	1.60172	0.479685	No	0.850693	0.896692	0.873693	-1.05407	0.870144	No
chr1:205870475-205874746:L1PA6	chr1	205870475	205874746	L1PA6	+	LINE/L1	L1PA6	2.01655	1.95254	1.98454	1.03278	0.971978	No	7431	ENSG00000174502	SLC26A9	Intergenic	11.4487	12.7713	12.11	-1.11553	0.877726	No	0.536704	0.694819	0.615761	-1.2946	0.102343	No
chr1:206582860-206583170:AluSx1	chr1	206582860	206583170	AluSx1	+	SINE/Alu	AluSx1	35.1052	37.0099	36.0575	-1.05426	0.888156	No	0	ENSG00000163486	SRGAP2	Intronic	55.4004	78.7466	67.0735	-1.42141	0.0997382	No	0.770901	1.15151	0.961203	-1.49371	0.244191	No
chr1:206583178-206583464:AluSp	chr1	206583178	206583464	AluSp	+	SINE/Alu	AluSp	6.34343	7.78277	7.0631	-1.2269	0.670915	No	0	ENSG00000163486	SRGAP2	Intronic	7.47949	11.0364	9.25794	-1.47555	0.2027	No	0.565874	0.76244	0.664157	-1.34737	0.102343	No
chr1:206614218-206614721:L2a	chr1	206614218	206614721	L2a	-	LINE/L2	L2a	1.34548	0.659674	1.00257	2.03961	0.116437	No	0	ENSG00000163486	SRGAP2	Intronic	0.544596	0.741649	0.643122	-1.36183	0.0952777	No	2.36959	3.80782	3.0887	-1.60695	0.315754	No
chr1:206625032-206625212:MIRb	chr1	206625032	206625212	MIRb	-	SINE/MIR	MIRb	0.890063	0.918922	0.904493	-1.03242	0.957425	No	0	ENSG00000163486	SRGAP2	Intronic	0.553583	0.689199	0.621391	-1.24498	0.124369	No	1.50992	3.36926	2.43959	-2.23142	0.102343	No
chr1:206630126-206630509:L2b	chr1	206630126	206630509	L2b	+	LINE/L2	L2b	2.34582	2.81199	2.57891	-1.19872	0.840053	No	0	ENSG00000163486	SRGAP2	Intronic	8.41971	22.2539	15.3368	-2.64307	0.0448458	Yes	0.544896	0.640414	0.592655	-1.1753	0.135017	No
chr1:206630589-206630766:L2c	chr1	206630589	206630766	L2c	-	LINE/L2	L2c	2.56167	1.69374	2.1277	1.51243	0.608428	No	0	ENSG00000163486	SRGAP2	Intronic	0.56583	0.642131	0.603981	-1.13485	0.256575	No	7.50801	14.7894	11.1487	-1.96982	0.105769	No
chr1:206767393-206767706:L1MC5	chr1	206767393	206767706	L1MC5	-	LINE/L1	L1MC5	10.3086	6.91667	8.61262	1.4904	0.370121	No	0	ENSG00000143486	EIF2D	Intronic	50.3481	38.6518	44.5	1.3026	0.381335	No	0.591463	0.836136	0.7138	-1.41367	0.102343	No
chr1:206823641-206823904:AluJb	chr1	206823641	206823904	AluJb	+	SINE/Alu	AluJb	3.81734	8.9826	6.39997	-2.35311	0.0812634	No	0	ENSG00000143479	DYRK3	Intronic	1.88014	6.22943	4.05478	-3.31327	0.00320405	Yes	0.536704	0.640414	0.588559	-1.19324	0.102343	No
chr1:206826356-206826662:AluJb	chr1	206826356	206826662	AluJb	-	SINE/Alu	AluJb	4.92646	15.5439	10.2352	-3.15519	0.0105785	Yes	0	ENSG00000143479	DYRK3	Intronic	0.536393	0.640152	0.588272	-1.19344	0.0952777	No	6.55682	28.5889	17.5729	-4.36018	1.37248e-07	Yes
chr1:20683304-20683601:MamRep434	chr1	20683304	20683601	MamRep434	-	DNA/TcMar-Tigger	MamRep434	0.681259	0.507926	0.594593	1.34126	0.216266	No	1918	ENSG00000158816	VWA5B1	afterGene	0.536393	0.640152	0.588272	-1.19344	0.0952777	No	1.1221	3.4358	2.27895	-3.06194	0.0117354	Yes
chr1:20685848-20686060:X30_DNA	chr1	20685848	20686060	X30_DNA	-	DNA	X30_DNA	0.572449	0.555407	0.563928	1.03068	0.92245	No	4462	ENSG00000158816	VWA5B1	afterGene	0.536393	0.640152	0.588272	-1.19344	0.0952777	No	1.47723	4.10964	2.79343	-2.782	0.0138765	Yes
chr1:20699462-20699563:L1MA4	chr1	20699462	20699563	L1MA4	-	LINE/L1	L1MA4	6.32884	0.723855	3.52635	8.74325	0.000143398	Yes	18076	ENSG00000158816	VWA5B1	Intergenic	19.2571	1.9591	10.6081	9.82961	3.37466e-07	Yes	0.536704	0.640414	0.588559	-1.19324	0.102343	No
chr1:20707191-20707398:LTR103b_Mam	chr1	20707191	20707398	LTR103b_Mam	-	LTR/ERV1?	LTR103b_Mam	1.48414	1.68038	1.58226	-1.13223	0.869246	No	25805	ENSG00000158816	VWA5B1	Intergenic	2.70045	0.679272	1.68986	3.97551	0.000185862	Yes	0.746352	1.7908	1.26858	-2.39941	0.0197469	Yes
chr1:207301774-207303058:L1M4b	chr1	207301774	207303058	L1M4b	+	LINE/L1	L1M4b	15.7471	1.52708	8.63708	10.3119	4.50303e-05	Yes	0	ENSG00000123838	C4BPA	Intronic	0.536393	0.640152	0.588272	-1.19344	0.0952777	No	17.3967	2.24688	9.8218	7.74262	1.20929e-05	Yes
chr1:207539723-207540286:MLT2B2	chr1	207539723	207540286	MLT2B2	-	LTR/ERVL	MLT2B2	10.2191	0.876728	5.5479	11.6559	0.000150467	Yes	5413	ENSG00000196352	CD55	Intergenic	0.544596	0.641892	0.593244	-1.17866	0.124364	No	20.8674	2.7238	11.7956	7.66116	8.68376e-06	Yes
chr1:207943749-207949834:L1PA6	chr1	207943749	207949834	L1PA6	-	LINE/L1	L1PA6	4.5935	3.46525	4.02938	1.32559	0.778687	No	0	ENSG00000117335	CD46	Intronic	0.93691	0.888003	0.912456	1.05508	0.892748	No	4.65545	12.0654	8.36041	-2.59167	0.0961255	No
chr1:207950675-207952653:L1PA14	chr1	207950675	207952653	L1PA14	-	LINE/L1	L1PA14	2.18471	3.30798	2.74635	-1.51415	0.637019	No	0	ENSG00000117335	CD46	Intronic	0.882104	0.693078	0.787591	1.27273	0.383484	No	2.45419	9.58288	6.01854	-3.9047	0.0117544	Yes
chr1:207954474-207955948:L1MB4	chr1	207954474	207955948	L1MB4	-	LINE/L1	L1MB4	2.53093	2.75766	2.6443	-1.08959	0.928917	No	0	ENSG00000117335	CD46	Intronic	1.53234	1.19143	1.36189	1.28613	0.585859	No	4.73358	18.7205	11.727	-3.95482	0.00585689	Yes
chr1:207957963-207958335:THE1C	chr1	207957963	207958335	THE1C	-	LTR/ERVL-MaLR	THE1C	1.96673	1.7355	1.85111	1.13323	0.874694	No	0	ENSG00000117335	CD46	Intronic	0.828227	0.651177	0.739702	1.27189	0.179605	No	6.13743	22.2018	14.1696	-3.61744	0.000180963	Yes
chr1:207963096-207963231:FLAM_C	chr1	207963096	207963231	FLAM_C	+	SINE/Alu	FLAM_C	1.49308	0.925613	1.20935	1.61307	0.376493	No	0	ENSG00000117335	CD46	Intronic	2.36865	5.80162	4.08513	-2.44933	0.040852	Yes	0.557284	0.666222	0.611753	-1.19548	0.147066	No
chr1:207964521-207965047:MER44B	chr1	207964521	207965047	MER44B	-	DNA/TcMar-Tigger	MER44B	2.57225	4.34164	3.45695	-1.68788	0.487255	No	0	ENSG00000117335	CD46	Intronic	0.733813	0.784007	0.75891	-1.0684	0.816	No	17.4683	35.1375	26.3029	-2.0115	0.102343	No
chr1:207965346-207965653:AluSz6	chr1	207965346	207965653	AluSz6	+	SINE/Alu	AluSz6	2.36171	1.72026	2.04098	1.37288	0.701466	No	0	ENSG00000117335	CD46	Intronic	10.2875	28.3614	19.3244	-2.75689	0.00143661	Yes	0.560789	0.706101	0.633445	-1.25912	0.117548	No
chr1:207966078-207966338:MER33	chr1	207966078	207966338	MER33	+	DNA/hAT-Charlie	MER33	1.40992	2.08687	1.74839	-1.48014	0.628803	No	0	ENSG00000117335	CD46	Intronic	7.33832	33.1771	20.2577	-4.52107	2.07841e-06	Yes	0.56344	0.656498	0.609969	-1.16516	0.196957	No
chr1:208033782-208034373:L2a	chr1	208033782	208034373	L2a	-	LINE/L2	L2a	2.59939	0.906583	1.75298	2.86723	0.0398431	Yes	23222	ENSG00000174059	CD34	Intergenic	2.61436	0.82073	1.71755	3.18541	0.0155805	Yes	0.536704	0.640414	0.588559	-1.19324	0.102343	No
chr1:208394432-208394604:MIR3	chr1	208394432	208394604	MIR3	+	SINE/MIR	MIR3	0.953891	0.732924	0.843408	1.30149	0.556784	No	0	ENSG00000076356	PLXNA2	Intronic	0.536393	0.640152	0.588272	-1.19344	0.0952777	No	2.14443	3.85463	2.99953	-1.79751	0.15185	No
chr1:208434605-208435906:HSMAR2	chr1	208434605	208435906	HSMAR2	-	DNA/TcMar-Mariner	HSMAR2	22.9142	1.45623	12.1852	15.7353	2.57365e-05	Yes	-16941	ENSG00000076356	PLXNA2	Intergenic	32.3895	9.1199	20.7547	3.55152	0.00139888	Yes	0.536704	0.674997	0.60585	-1.25767	0.102343	No
chr1:208438889-208438942:MIRb	chr1	208438889	208438942	MIRb	+	SINE/MIR	MIRb	6.4118	0.719741	3.56577	8.90849	0.000186188	Yes	-21225	ENSG00000076356	PLXNA2	Intergenic	0.536393	0.640152	0.588272	-1.19344	0.0952777	No	10.6347	1.91974	6.2772	5.53962	0.000376768	Yes
chr1:20972485-20972818:AluJr	chr1	20972485	20972818	AluJr	+	SINE/Alu	AluJr	2.32789	7.47055	4.89922	-3.20915	0.0184264	Yes	0	ENSG00000158828	PINK1	Intronic	1.377	1.05539	1.2162	1.30473	0.491312	No	2.90181	17.5595	10.2306	-6.05121	1.67514e-07	Yes
chr1:2101916-2102487:L1MB3	chr1	2101916	2102487	L1MB3	-	LINE/L1	L1MB3	6.86798	3.74923	5.3086	1.83184	0.318838	No	0	ENSG00000067606	PRKCZ	Intronic	0.61262	4.46415	2.53839	-7.28699	1.05113e-08	Yes	20.474	12.8941	16.684	1.58785	0.138687	No
chr1:210284435-210289552:HERVH-int	chr1	210284435	210289552	LTR7|HERVH-int|HERVH-int|HERVH-int|HERVH-int|LTR7	-	LTR/ERV1	HERVH-int	16.4008	7.66362	12.0322	2.14008	0.13044	No	0	ENSG00000143469	SYT14	Intronic	0.591128	0.661146	0.626137	-1.11845	0.375305	No	15.3762	5.96354	10.6699	2.57837	0.0210661	Yes
chr1:210337974-210338071:UCON38	chr1	210337974	210338071	UCON38	-	DNA/hAT-Charlie	UCON38	3.10725	14.5711	8.83918	-4.6894	0.00525727	Yes	339	ENSG00000143469	SYT14	afterGene	0.548921	0.914357	0.731639	-1.66574	0.0258248	No	1.7771	9.90052	5.83881	-5.57115	0.000475515	Yes
chr1:210338342-210338569:MIRb	chr1	210338342	210338569	MIRb	-	SINE/MIR	MIRb	4.36167	23.5207	13.9412	-5.39258	0.00162052	Yes	707	ENSG00000143469	SYT14	afterGene	0.536393	0.640152	0.588272	-1.19344	0.0952777	No	2.69566	12.4791	7.58736	-4.62932	0.00151045	Yes
chr1:210338957-210339148:L2c	chr1	210338957	210339148	L2c	+	LINE/L2	L2c	5.46396	17.6138	11.5389	-3.22364	0.0130046	Yes	1322	ENSG00000143469	SYT14	afterGene	4.22896	17.6367	10.9328	-4.17045	0.00159126	Yes	0.536704	0.640414	0.588559	-1.19324	0.102343	No
chr1:210339222-210339524:L2c	chr1	210339222	210339524	L2c	-	LINE/L2	L2c	5.71594	39.2939	22.5049	-6.87444	4.03373e-05	Yes	1587	ENSG00000143469	SYT14	afterGene	0.536393	0.646348	0.59137	-1.20499	0.0952777	No	6.5385	22.0764	14.3074	-3.37637	0.00382646	Yes
chr1:210339629-210339906:AluJb	chr1	210339629	210339906	AluJb	+	SINE/Alu	AluJb	10.3801	44.7732	27.5767	-4.31336	0.000202425	Yes	1994	ENSG00000143469	SYT14	afterGene	6.04377	19.456	12.7499	-3.21917	0.00789614	Yes	0.667015	0.640414	0.653714	1.04154	0.788538	No
chr1:210360949-210369023:HERVH-int	chr1	210360949	210369023	LTR7B|HERVH-int|HERVH-int|HERVH-int|LTR7B	+	LTR/ERV1	HERVH-int	1.04017	1.21715	1.12866	-1.17015	0.838681	No	23314	ENSG00000143469	SYT14	Intergenic	0.852177	3.22709	2.03964	-3.78688	0.01504	Yes	0.641285	0.644613	0.642949	-1.00519	0.976689	No
chr1:21067032-21067331:AluJr	chr1	21067032	21067331	AluJr	+	SINE/Alu	AluJr	4.14844	19.2346	11.6915	-4.6366	0.000769263	Yes	1824	ENSG00000127483	HP1BP3	afterGene	0.634077	0.640152	0.637115	-1.00958	0.95006	No	6.5873	21.8335	14.2104	-3.31449	0.000500063	Yes
chr1:21080216-21081778:L1MB7	chr1	21080216	21081778	L1MB7	+	LINE/L1	L1MB7	36.303	84.0422	60.1726	-2.31502	0.0125622	Yes	0	ENSG00000127483	HP1BP3	Intronic	0.593805	0.79046	0.692132	-1.33118	0.102847	No	103.399	194.183	148.791	-1.87799	0.00937555	No
chr1:210910802-210911732:L2a	chr1	210910802	210911732	L2a	+	LINE/L2	L2a	1.8282	0.464574	1.14639	3.93521	0.000540503	Yes	0	ENSG00000143473	KCNH1	Intronic	0.592002	0.674666	0.633334	-1.13964	0.320282	No	6.74802	0.997091	3.87255	6.7677	5.74253e-05	Yes
chr1:2109533-2109955:L1MB7	chr1	2109533	2109955	L1MB7	-	LINE/L1	L1MB7	3.54407	2.89399	3.21903	1.22463	0.814628	No	0	ENSG00000067606	PRKCZ	Intronic	0.553583	1.46228	1.00793	-2.64148	0.00137594	Yes	10.3055	10.8848	10.5951	-1.05621	0.886068	No
chr1:211058469-211064144:L1PA7	chr1	211058469	211064144	L1PA7	+	LINE/L1	L1PA7	2.49766	0.581369	1.53952	4.29617	0.00478793	Yes	0	ENSG00000143473	KCNH1	Intronic	0.592002	0.640152	0.616077	-1.08133	0.519903	No	2.09404	0.740084	1.41706	2.82946	0.0236283	Yes
chr1:211127242-211133387:L1PA6	chr1	211127242	211133387	L1PA6	-	LINE/L1	L1PA6	3.08216	0.55763	1.81989	5.52724	0.000346711	Yes	0	ENSG00000143473	KCNH1	Intronic	6.42517	0.856632	3.6409	7.5005	2.9106e-05	Yes	0.560789	0.728861	0.644825	-1.29971	0.105946	No
chr1:211539708-211540132:L2c	chr1	211539708	211540132	L2c	-	LINE/L2	L2c	1.93702	1.06522	1.50112	1.81842	0.431635	No	0	ENSG00000082512	TRAF5	Intronic	0.582982	0.74041	0.661696	-1.27004	0.127035	No	9.49211	8.56149	9.0268	1.1087	0.789236	No
chr1:211860397-211867923:Harlequin-int	chr1	211860397	211867923	LTR2|Harlequin-int|Harlequin-int|Harlequin-int|LTR2	+	LTR/ERV1	Harlequin-int	1.04569	0.962626	1.00416	1.08629	0.898837	No	-11438	ENSG00000117650	NEK2	Intergenic	1.12979	2.29441	1.7121	-2.03084	0.0952777	No	0.592274	0.688172	0.640223	-1.16191	0.282884	No
chr1:2119053-2119491:L1MC1	chr1	2119053	2119491	L1MC1	-	LINE/L1	L1MC1	5.26332	33.9515	19.6074	-6.45058	9.75754e-05	Yes	0	ENSG00000162585	C1orf86	Intronic	9.38758	61.115	35.2513	-6.51019	9.32096e-12	Yes	0.712829	0.799445	0.756137	-1.12151	0.648623	No
chr1:211988008-211989110:L2b	chr1	211988008	211989110	L2b	+	LINE/L2	L2b	10.3971	0.988235	5.69265	10.5209	0.000490653	Yes	0	ENSG00000123684	LPGAT1	Intronic	0.536393	0.662643	0.599518	-1.23537	0.0952777	No	6.99212	5.75359	6.37285	1.21526	0.642791	No
chr1:211989422-211989753:L2b	chr1	211989422	211989753	L2b	+	LINE/L2	L2b	2.28156	0.799033	1.5403	2.8554	0.0454472	Yes	0	ENSG00000123684	LPGAT1	Intronic	0.640754	0.642131	0.641442	-1.00215	0.992138	No	2.43911	2.54599	2.49255	-1.04382	0.935148	No
chr1:2119907-2120020:MLT1A1	chr1	2119907	2120020	MLT1A1	-	LTR/ERVL-MaLR	MLT1A1	1.67656	9.64509	5.66083	-5.75291	0.00696171	Yes	0	ENSG00000162585	C1orf86	Intronic	3.29878	24.4904	13.8946	-7.42409	1.09627e-09	Yes	0.816846	0.719558	0.768202	1.1352	0.579164	No
chr1:2120487-2120794:AluJo	chr1	2120487	2120794	AluJo	+	SINE/Alu	AluJo	1.66312	7.69652	4.67982	-4.62776	0.0273835	Yes	0	ENSG00000162585	C1orf86	Intronic	0.628955	0.722924	0.675939	-1.14941	0.526121	No	3.44914	26.1171	14.7831	-7.57206	5.12718e-10	Yes
chr1:212932626-212934523:L1M2b	chr1	212932626	212934523	L1M2b	+	LINE/L1	L1M2b	1.52743	1.44674	1.48708	1.05577	0.950426	No	0	ENSG00000117697	NSL1	Intronic	0.536393	0.640152	0.588272	-1.19344	0.0952777	No	1.47466	1.1042	1.28943	1.3355	0.556664	No
chr1:212990092-212990184:L3	chr1	212990092	212990184	L3	+	LINE/CR1	L3	1.28623	2.20798	1.74711	-1.71663	0.460981	No	125	ENSG00000203705	TATDN3	afterGene	8.57423	3.31715	5.94569	2.58482	0.0543328	No	0.536704	0.64578	0.591242	-1.20323	0.102343	No
chr1:213064967-213066395:Tigger1	chr1	213064967	213066395	Tigger1	+	DNA/TcMar-Tigger	Tigger1	2.43965	1.32318	1.88141	1.84379	0.402961	No	0	ENSG00000162769	FLVCR1	Intronic	4.89574	17.7787	11.3372	-3.63147	0.000971729	Yes	0.536704	0.707352	0.622028	-1.31796	0.0793957	No
chr1:213126657-213126789:L3	chr1	213126657	213126789	L3	-	LINE/CR1	L3	1.29261	21.4714	11.382	-16.6109	1.94325e-06	Yes	0	ENSG00000143494	VASH2	Intronic	0.536393	0.640152	0.588272	-1.19344	0.0952777	No	1.62852	12.8733	7.2509	-7.90488	1.11e-08	Yes
chr1:213126892-213127097:MIR3	chr1	213126892	213127097	MIR3	+	SINE/MIR	MIR3	1.55623	16.5727	9.06445	-10.6493	5.2071e-05	Yes	0	ENSG00000143494	VASH2	Intronic	0.945128	10.5627	5.7539	-11.1759	8.3773e-10	Yes	0.536704	0.70996	0.623332	-1.32282	0.102343	No
chr1:213127244-213127554:AluJb	chr1	213127244	213127554	AluJb	-	SINE/Alu	AluJb	1.40724	14.04	7.72361	-9.97693	7.12255e-05	Yes	0	ENSG00000143494	VASH2	Intronic	0.536393	0.640152	0.588272	-1.19344	0.0952777	No	0.641532	9.73701	5.18927	-15.1777	4.55948e-13	Yes
chr1:213128059-213128232:L3	chr1	213128059	213128232	L3	-	LINE/CR1	L3	1.1626	16.0249	8.59373	-13.7836	5.12547e-05	Yes	0	ENSG00000143494	VASH2	Intronic	0.536393	0.640152	0.588272	-1.19344	0.0952777	No	1.41347	12.2311	6.82227	-8.6532	2.86919e-08	Yes
chr1:213129951-213130190:L1ME4c	chr1	213129951	213130190	L1ME4c	-	LINE/L1	L1ME4c	1.46452	19.8385	10.6515	-13.5461	2.49599e-05	Yes	0	ENSG00000143494	VASH2	Intronic	0.536393	0.64246	0.589426	-1.19774	0.0952777	No	2.15307	21.2417	11.6974	-9.86577	2.5224e-10	Yes
chr1:214511660-214512326:L1ME3G	chr1	214511660	214512326	L1ME3G	-	LINE/L1	L1ME3G	10.0221	4.71995	7.37101	2.12334	0.210202	No	1187	ENSG00000143499	SMYD2	afterGene	0.544596	0.694906	0.619751	-1.276	0.0952777	No	26.3623	12.9991	19.6807	2.02802	0.0580145	No
chr1:214840665-214841499:L1PA16	chr1	214840665	214841499	L1PA16	+	LINE/L1	L1PA16	2.92631	10	6.46317	-3.41729	0.0330519	Yes	2735	ENSG00000117724	CENPF	afterGene	5.29967	41.936	23.6178	-7.91293	2.15442e-10	Yes	0.536704	0.787189	0.661946	-1.46671	0.0521332	No
chr1:215789030-215789527:MER39	chr1	215789030	215789527	MER39	-	LTR/ERV1	MER39	2.87671	2.55607	2.71639	1.12544	0.88976	No	0	ENSG00000136636	KCTD3	Intronic	0.536393	0.64246	0.589426	-1.19774	0.0952777	No	8.68035	21.9323	15.3063	-2.52666	0.00948694	Yes
chr1:217090227-217090727:MLT1H	chr1	217090227	217090727	MLT1H	-	LTR/ERVL-MaLR	MLT1H	0.685074	0.4638	0.574437	1.47709	0.101281	No	0	ENSG00000196482	ESRRG	Intronic	3.89415	1.36686	2.63051	2.84897	0.0457563	Yes	0.536704	0.640414	0.588559	-1.19324	0.102343	No
chr1:21749756-21750197:L1MC4	chr1	21749756	21750197	L1MC4	+	LINE/L1	L1MC4	3.82729	7.03109	5.42919	-1.83709	0.20794	No	-16425	ENSG00000142794	NBPF3	Intergenic	0.659033	0.649662	0.654347	1.01442	0.929869	No	18.6033	19.2501	18.9267	-1.03477	0.938907	No
chr1:21773582-21774237:L1MC2	chr1	21773582	21774237	L1MC2	-	LINE/L1	L1MC2	4.0048	9.8565	6.93065	-2.46117	0.0402752	Yes	0	ENSG00000142794	NBPF3	Intronic	0.536393	0.640152	0.588272	-1.19344	0.0952777	No	2.94472	6.50175	4.72324	-2.20793	0.0792224	No
chr1:21783053-21783640:L1ME1	chr1	21783053	21783640	L1ME1	+	LINE/L1	L1ME1	4.09702	2.49527	3.29615	1.64192	0.443999	No	0	ENSG00000142794	NBPF3	Intronic	13.7399	4.45055	9.09524	3.08724	0.0152617	Yes	0.549355	0.642394	0.595875	-1.16936	0.15203	No
chr1:2190978-2191845:L1MC4	chr1	2190978	2191845	L1MC4	-	LINE/L1	L1MC4	2.68142	1.31408	1.99775	2.04052	0.298005	No	0	ENSG00000157933	SKI	Intronic	0.536393	0.640152	0.588272	-1.19344	0.0952777	No	2.45046	2.4915	2.47098	-1.01675	0.978838	No
chr1:2192278-2193253:L1MD	chr1	2192278	2193253	L1MD	-	LINE/L1	L1MD	2.47588	1.08133	1.7786	2.28967	0.212697	No	0	ENSG00000157933	SKI	Intronic	0.536393	0.640152	0.588272	-1.19344	0.0952777	No	2.57431	2.9754	2.77485	-1.15581	0.763949	No
chr1:21932920-21932982:MIR1_Amn	chr1	21932920	21932982	MIR1_Amn	+	SINE/MIR	MIR1_Amn	5.31865	1.07106	3.19486	4.96578	0.0127015	Yes	0	ENSG00000076864	RAP1GAP	Intronic	0.583067	0.640152	0.61161	-1.0979	0.428896	No	23.4437	6.34202	14.8929	3.69657	0.00142589	Yes
chr1:219480968-219483158:THE1A-int	chr1	219480968	219483158	THE1A|THE1A-int|THE1A	+	LTR/ERVL-MaLR	THE1A-int	4.18243	4.90389	4.54316	-1.1725	0.792394	No	94762	ENSG00000143353	LYPLAL1	Intergenic	6.7368	14.8565	10.7967	-2.20528	0.0136551	Yes	0.536704	0.640414	0.588559	-1.19324	0.102343	No
chr1:22008055-22008762:HAL1	chr1	22008055	22008762	HAL1	-	LINE/L1	HAL1	2.95992	1.52574	2.24283	1.94	0.393637	No	0	ENSG00000090686	USP48	Intronic	14.8825	22.9037	18.8931	-1.53896	0.184214	No	0.560354	0.642736	0.601545	-1.14702	0.219646	No
chr1:220085145-220085355:MER20	chr1	220085145	220085355	MER20	+	DNA/hAT-Charlie	MER20	17.9246	15.0076	16.4661	1.19437	0.781834	No	0	ENSG00000196660	SLC30A10	Intronic	0.536393	0.640152	0.588272	-1.19344	0.0952777	No	34.137	25.8156	29.9763	1.32234	0.278006	No
chr1:220085895-220086205:AluYk3	chr1	220085895	220086205	AluYk3	+	SINE/Alu	AluYk3	6.74885	9.70712	8.22799	-1.43834	0.425735	No	0	ENSG00000196660	SLC30A10	Intronic	0.536393	0.640152	0.588272	-1.19344	0.0952777	No	10.7898	12.7752	11.7825	-1.18401	0.638715	No
chr1:22010137-22011813:L1MA4A	chr1	22010137	22011813	L1MA4A	-	LINE/L1	L1MA4A	3.75302	1.47267	2.61285	2.54845	0.185044	No	0	ENSG00000090686	USP48	Intronic	12.9611	20.2701	16.6156	-1.56392	0.296263	No	0.557284	0.699664	0.628474	-1.25549	0.102343	No
chr1:220428541-220430438:L1PA11	chr1	220428541	220430438	L1PA11	+	LINE/L1	L1PA11	2.48023	2.61595	2.54809	-1.05472	0.955323	No	0	ENSG00000118873	RAB3GAP2	Intronic	1.89504	2.64066	2.26785	-1.39346	0.467486	No	0.77531	1.07685	0.926079	-1.38892	0.434367	No
chr1:220755686-220755861:MER91A	chr1	220755686	220755861	MER91A	-	DNA/hAT-Tip100	MER91A	5.68369	38.0844	21.8841	-6.70065	1.33769e-06	Yes	0	ENSG00000116141	MARK1	Intronic	0.536393	0.640152	0.588272	-1.19344	0.0952777	No	14.5696	47.0477	30.8087	-3.22916	5.04481e-07	Yes
chr1:22076395-22077083:L2a	chr1	22076395	22077083	L2a	+	LINE/L2	L2a	4.30486	1.14709	2.72598	3.75285	0.0460122	Yes	0	ENSG00000090686	USP48	Intronic	0.536393	0.642131	0.589262	-1.19713	0.0952777	No	3.13083	4.59263	3.86173	-1.46691	0.428783	No
chr1:220778863-220785034:L1PA6	chr1	220778863	220785034	L1PA6	-	LINE/L1	L1PA6	1.20527	1.61168	1.40847	-1.3372	0.739591	No	0	ENSG00000116141	MARK1	Intronic	0.544596	0.687287	0.615942	-1.26201	0.0952777	No	2.29731	11.1775	6.73741	-4.86548	0.00204876	Yes
chr1:220814955-220821404:L1PA10	chr1	220814955	220821404	L1PA10	+	LINE/L1	L1PA10	9.55797	11.2451	10.4015	-1.17651	0.858611	No	0	ENSG00000116141	MARK1	Intronic	41.9349	97.8313	69.8831	-2.33293	0.0947609	No	0.754041	0.870491	0.812266	-1.15443	0.577767	No
chr1:220828452-220829370:L2a	chr1	220828452	220829370	L2a	+	LINE/L2	L2a	3.60884	3.12831	3.36858	1.15361	0.878302	No	0	ENSG00000116141	MARK1	Intronic	8.13325	25.4997	16.8165	-3.13524	0.0122399	Yes	0.536704	0.642394	0.589549	-1.19693	0.102343	No
chr1:220834106-220834656:L2a	chr1	220834106	220834656	L2a	-	LINE/L2	L2a	1.44069	1.99975	1.72022	-1.38805	0.72349	No	0	ENSG00000116141	MARK1	Intronic	0.544596	0.845471	0.695033	-1.55247	0.0338699	No	7.13313	48.2721	27.7026	-6.76731	2.00196e-07	Yes
chr1:220875273-220875862:LTR64	chr1	220875273	220875862	LTR64	-	LTR/ERV1	LTR64	17.7939	1.36752	9.58069	13.0118	0.000170083	Yes	2775	ENSG00000162817	C1orf115	afterGene	0.536393	0.640152	0.588272	-1.19344	0.0952777	No	37.0366	1.65217	19.3444	22.4169	5.79433e-09	Yes
chr1:220920719-220921365:MER67B	chr1	220920719	220921365	MER67B	-	LTR/ERV1	MER67B	26.665	6.18351	16.4243	4.31228	0.00241253	Yes	-203	ENSG00000117791	MARC2	Intergenic	38.0051	4.1912	21.0982	9.06785	1.6792e-07	Yes	0.747667	0.68956	0.718614	1.08427	0.6431	No
chr1:2226816-2227549:L1MB7	chr1	2226816	2227549	L1MB7	-	LINE/L1	L1MB7	2.83083	0.881818	1.85632	3.21022	0.0567593	No	0	ENSG00000157933	SKI	Intronic	0.742872	0.950156	0.846514	-1.27903	0.562163	No	2.8915	7.78126	5.33638	-2.69108	0.0339193	Yes
chr1:222728225-222729181:L1MA9	chr1	222728225	222729181	L1MA9	+	LINE/L1	L1MA9	14.4824	56.8402	35.6613	-3.92477	0.000102109	Yes	2064	ENSG00000143498	TAF1A	afterGene	0.659033	0.642131	0.650582	1.02632	0.866076	No	44.6508	95.6069	70.1288	-2.14121	0.000452448	Yes
chr1:222729292-222729686:LTR64	chr1	222729292	222729686	LTR64	-	LTR/ERV1	LTR64	10.4112	39.0341	24.7227	-3.74923	0.000298885	Yes	1559	ENSG00000143498	TAF1A	afterGene	21.3927	45.8758	33.6343	-2.14446	0.00536452	Yes	0.544896	0.640414	0.592655	-1.1753	0.135017	No
chr1:2227848-2228224:L1MB7	chr1	2227848	2228224	L1MB7	-	LINE/L1	L1MB7	1.26811	0.843146	1.05563	1.50402	0.469022	No	0	ENSG00000157933	SKI	Intronic	1.16905	0.78607	0.97756	1.48721	0.299821	No	2.15688	6.46031	4.30859	-2.99521	0.0224175	Yes
chr1:223265800-223266114:LTR55	chr1	223265800	223266114	LTR55	+	LTR/ERVL?	LTR55	1.67957	0.651594	1.16558	2.57763	0.0322014	Yes	16635	ENSG00000187554	TLR5	Intergenic	0.536393	0.640152	0.588272	-1.19344	0.0952777	No	4.33619	1.31895	2.82757	3.2876	0.0125969	Yes
chr1:223377406-223377804:Arthur1	chr1	223377406	223377804	Arthur1	-	DNA/hAT-Tip100	Arthur1	15.4989	4.20887	9.8539	3.68245	0.0443959	Yes	16358	ENSG00000143502	SUSD4	Intergenic	82.0914	20.9598	51.5256	3.91662	1.64404e-06	Yes	0.797443	0.683345	0.740394	1.16697	0.410637	No
chr1:223378364-223378714:MLT1A0	chr1	223378364	223378714	MLT1A0	-	LTR/ERVL-MaLR	MLT1A0	23.1266	5.21851	14.1726	4.43165	0.00999494	Yes	15448	ENSG00000143502	SUSD4	Intergenic	36.6289	12.8534	24.7412	2.84974	0.00125761	Yes	0.544896	0.744872	0.644884	-1.367	0.102343	No
chr1:223379683-223380023:AluSz6	chr1	223379683	223380023	AluSz6	+	SINE/Alu	AluSz6	19.619	3.97769	11.7983	4.93226	0.00381855	Yes	14139	ENSG00000143502	SUSD4	Intergenic	0.536393	0.713213	0.624803	-1.32965	0.0952777	No	21.5474	8.49449	15.021	2.53664	0.0209239	Yes
chr1:223380391-223383426:HERVP71A-int	chr1	223380391	223383426	HERVP71A-int|HERVP71A-int|HERVP71A-int|LTR71B	+	LTR/ERV1	HERVP71A-int	117.313	22.9849	70.1492	5.10393	0.00624703	Yes	10736	ENSG00000143502	SUSD4	Intergenic	0.586324	0.828623	0.707474	-1.41325	0.0952777	No	64.2993	35.3391	49.8192	1.81949	0.102343	No
chr1:223391304-223391910:MSTB1-int	chr1	223391304	223391910	MSTB1|MSTB1-int	+	LTR/ERVL-MaLR	MSTB1-int	13.7961	2.4016	8.09886	5.74456	0.00995523	Yes	2252	ENSG00000143502	SUSD4	afterGene	0.536393	0.667769	0.602081	-1.24493	0.0952777	No	9.50207	2.26792	5.885	4.18977	0.00378782	Yes
chr1:223392212-223393833:MSTB1-int	chr1	223392212	223393833	MSTB1-int|MSTB1	+	LTR/ERVL-MaLR	MSTB1-int	42.3974	10.2369	26.3172	4.14163	0.0168352	Yes	329	ENSG00000143502	SUSD4	afterGene	0.544596	0.640152	0.592374	-1.17546	0.127035	No	18.6463	3.96035	11.3033	4.70825	0.00105627	Yes
chr1:223408538-223415006:L1MC1	chr1	223408538	223415006	L1MC1	-	LINE/L1	L1MC1	10.5044	5.11668	7.81051	2.05296	0.251656	No	0	ENSG00000143502	SUSD4	Intronic	36.9674	30.784	33.8757	1.20087	0.574936	No	0.607759	0.706836	0.657297	-1.16302	0.33101	No
chr1:224194988-224195997:L1MC4	chr1	224194988	224195997	L1MC4	+	LINE/L1	L1MC4	9.94286	3.31228	6.62757	3.00182	0.0885599	No	19764	ENSG00000269358	AC138393.1	Intergenic	32.4871	15.6512	24.0692	2.07569	0.0845965	No	0.56344	0.667956	0.615698	-1.1855	0.146167	No
chr1:224646910-224647048:MLT1J	chr1	224646910	224647048	MLT1J	+	LTR/ERVL-MaLR	MLT1J	6.25367	1.83664	4.04515	3.40496	0.0343102	Yes	0	ENSG00000143786	CNIH3	Intronic	18.796	13.5478	16.1719	1.38738	0.327608	No	0.544896	0.640414	0.592655	-1.1753	0.135017	No
chr1:224647919-224648466:L1ME1	chr1	224647919	224648466	L1ME1	-	LINE/L1	L1ME1	1.11808	1.1489	1.13349	-1.02756	0.968259	No	0	ENSG00000143786	CNIH3	Intronic	0.536393	0.642131	0.589262	-1.19713	0.0952777	No	4.29456	11.4548	7.87466	-2.66728	0.0179777	Yes
chr1:224795995-224796453:LTR2	chr1	224795995	224796453	LTR2	-	LTR/ERV1	LTR2	11.0529	14.2289	12.6409	-1.28734	0.705814	No	0	ENSG00000143786	CNIH3	Intronic	20.8914	3.28652	12.0889	6.35668	8.65186e-05	Yes	0.536704	0.688885	0.612794	-1.28355	0.102343	No
chr1:224796454-224796868:MER50	chr1	224796454	224796868	MER50	-	LTR/ERV1	MER50	14.3941	17.5368	15.9654	-1.21834	0.710344	No	0	ENSG00000143786	CNIH3	Intronic	20.46	3.66594	12.063	5.58112	0.000152651	Yes	0.591463	0.647195	0.619329	-1.09423	0.461907	No
chr1:224797983-224798353:THE1D	chr1	224797983	224798353	THE1D	+	LTR/ERVL-MaLR	THE1D	11.3187	13.3788	12.3487	-1.18201	0.787103	No	0	ENSG00000143786	CNIH3	Intronic	0.536393	0.647841	0.592117	-1.20777	0.0952777	No	9.67926	1.44483	5.56205	6.69925	0.000265323	Yes
chr1:224799047-224799315:MLT1J	chr1	224799047	224799315	MLT1J	-	LTR/ERVL-MaLR	MLT1J	10.4102	14.6796	12.5449	-1.41012	0.51107	No	0	ENSG00000143786	CNIH3	Intronic	11.234	4.21843	7.72624	2.66308	0.0552675	No	0.544896	0.642394	0.593645	-1.17893	0.131915	No
chr1:225173314-225174790:L1M1	chr1	225173314	225174790	L1M1	+	LINE/L1	L1M1	0.686124	0.506746	0.596435	1.35398	0.242515	No	0	ENSG00000185842	DNAH14	Intronic	2.3852	1.40841	1.8968	1.69354	0.213749	No	0.536704	0.693146	0.614925	-1.29149	0.102343	No
chr1:225593048-225593452:MSTD	chr1	225593048	225593452	MSTD	+	LTR/ERVL-MaLR	MSTD	1.05195	4.01079	2.53137	-3.8127	0.0904479	No	0	ENSG00000143815	LBR	Intronic	0.536393	0.829868	0.68313	-1.54713	0.0410864	No	4.19639	37.6216	20.909	-8.96522	7.34237e-09	Yes
chr1:225593724-225594078:L2d2	chr1	225593724	225594078	L2d2	+	LINE/L2	L2d2	1.28854	2.73408	2.01131	-2.12184	0.289991	No	0	ENSG00000143815	LBR	Intronic	0.536393	0.684607	0.6105	-1.27632	0.0952777	No	3.59901	27.2682	15.4336	-7.57658	3.43226e-06	Yes
chr1:225594695-225595069:L2a	chr1	225594695	225595069	L2a	+	LINE/L2	L2a	2.46952	3.86168	3.1656	-1.56373	0.625697	No	0	ENSG00000143815	LBR	Intronic	0.536393	0.714557	0.625475	-1.33215	0.0952777	No	4.05911	37.0708	20.5649	-9.13274	8.64413e-07	Yes
chr1:225595611-225596006:L1MA5A	chr1	225595611	225596006	L1MA5A	-	LINE/L1	L1MA5A	3.71814	6.21062	4.96438	-1.67036	0.36139	No	0	ENSG00000143815	LBR	Intronic	4.49345	31.9783	18.2359	-7.11665	3.90637e-08	Yes	0.673471	0.747416	0.710444	-1.1098	0.607811	No
chr1:225598141-225598739:L1MC4a	chr1	225598141	225598739	L1MC4a	+	LINE/L1	L1MC4a	2.81712	12.3203	7.56873	-4.37338	0.0125151	Yes	0	ENSG00000143815	LBR	Intronic	0.599018	0.844745	0.721882	-1.41022	0.103697	No	6.28453	60.7166	33.5005	-9.66127	9.57914e-08	Yes
chr1:225974955-225975248:AluSg	chr1	225974955	225975248	AluSg	+	SINE/Alu	AluSg	12.3743	31.1516	21.763	-2.51743	0.0427761	Yes	0	ENSG00000143742	SRP9	Intronic	6.38229	18.312	12.3472	-2.86919	0.00140062	Yes	0.583239	0.640414	0.611826	-1.09803	0.433051	No
chr1:225975901-225976093:AluSx	chr1	225975901	225976093	AluSx	+	SINE/Alu	AluSx	5.52434	33.3406	19.4325	-6.03522	6.35371e-05	Yes	0	ENSG00000143742	SRP9	Intronic	7.50774	35.3062	21.407	-4.70264	1.27901e-06	Yes	0.536704	0.665961	0.601332	-1.24084	0.102343	No
chr1:225976117-225976415:AluSg	chr1	225976117	225976415	AluSg	-	SINE/Alu	AluSg	8.55517	29.7926	19.1739	-3.48241	0.000936527	Yes	0	ENSG00000143742	SRP9	Intronic	0.544596	0.640152	0.592374	-1.17546	0.127035	No	6.2455	29.2918	17.7687	-4.69007	2.12008e-07	Yes
chr1:226028206-226028433:LTR37A	chr1	226028206	226028433	LTR37A	-	LTR/ERV1	LTR37A	7.62031	0.555155	4.08773	13.7265	3.37492e-06	Yes	0	ENSG00000143819	EPHX1	Intronic	23.3378	3.19451	13.2662	7.30559	1.04769e-05	Yes	1.57525	0.78284	1.17905	2.01223	0.102343	No
chr1:226028981-226029284:AluSx1	chr1	226028981	226029284	AluSx1	-	SINE/Alu	AluSx1	5.61528	0.609569	3.11243	9.21189	0.000100642	Yes	0	ENSG00000143819	EPHX1	Intronic	23.565	3.32873	13.4468	7.07927	3.86318e-06	Yes	0.848417	0.785403	0.81691	1.08023	0.800179	No
chr1:226029303-226029604:AluSx	chr1	226029303	226029604	AluSx	-	SINE/Alu	AluSx	16.8009	0.633093	8.717	26.5378	9.43325e-07	Yes	0	ENSG00000143819	EPHX1	Intronic	13.8923	2.56358	8.22793	5.41911	0.000227715	Yes	0.906271	0.649309	0.77779	1.39575	0.102343	No
chr1:226030759-226030878:L2a	chr1	226030759	226030878	L2a	+	LINE/L2	L2a	11.3237	0.761539	6.04262	14.8695	4.28916e-05	Yes	0	ENSG00000143819	EPHX1	Intronic	1.06877	0.699923	0.884346	1.52698	0.126698	No	31.6459	4.71796	18.1819	6.70752	2.37443e-05	Yes
chr1:226030855-226031106:L2c	chr1	226030855	226031106	L2c	-	LINE/L2	L2c	23.597	0.9052	12.2511	26.0683	1.69511e-05	Yes	0	ENSG00000143819	EPHX1	Intronic	46.8775	4.77953	25.8285	9.80796	1.25342e-06	Yes	1.29798	0.915959	1.10697	1.41708	0.373959	No
chr1:226031761-226031882:MIRb	chr1	226031761	226031882	MIRb	+	SINE/MIR	MIRb	9.91722	0.635507	5.27636	15.6052	1.745e-05	Yes	0	ENSG00000143819	EPHX1	Intronic	0.801342	0.71797	0.759656	1.11612	0.677566	No	19.9823	2.6349	11.3086	7.58372	1.30904e-06	Yes
chr1:226103299-226103785:MER70C	chr1	226103299	226103785	MER70C	-	LTR/ERVL	MER70C	22.8934	5.27331	14.0834	4.34137	0.00181863	Yes	0	ENSG00000255835	RP4-559A3.7	Intronic	27.0102	12.0303	19.5202	2.24519	0.0101358	Yes	0.536704	0.640414	0.588559	-1.19324	0.102343	No
chr1:226257901-226258184:AluY	chr1	226257901	226258184	AluY	+	SINE/Alu	AluY	3.72479	2.32824	3.02652	1.59983	0.581766	No	0	ENSG00000163041	H3F3A	Intronic	7.12133	39.7356	23.4285	-5.5798	3.20187e-09	Yes	0.553941	0.774525	0.664233	-1.39821	0.102343	No
chr1:226258194-226258490:AluSx3	chr1	226258194	226258490	AluSx3	+	SINE/Alu	AluSx3	1.51197	1.79388	1.65293	-1.18645	0.840975	No	0	ENSG00000163041	H3F3A	Intronic	5.35756	29.4155	17.3865	-5.49047	1.47594e-07	Yes	0.641285	0.68363	0.662457	-1.06603	0.713254	No
chr1:227114536-227117953:L1PA5	chr1	227114536	227117953	L1PA5	+	LINE/L1	L1PA5	2.26831	1.46162	1.86496	1.55191	0.527462	No	0	ENSG00000163050	ADCK3	Intronic	12.0251	10.8163	11.4207	1.11176	0.809728	No	0.565874	0.746469	0.656171	-1.31914	0.102343	No
chr1:227258328-227258419:L2a	chr1	227258328	227258419	L2a	-	LINE/L2	L2a	13.3651	3.51686	8.44098	3.80029	0.00671125	Yes	0	ENSG00000143776	CDC42BPA	Intronic	40.7546	5.49868	23.1266	7.4117	4.76096e-06	Yes	0.536704	0.640414	0.588559	-1.19324	0.102343	No
chr1:227418059-227418510:L1M5	chr1	227418059	227418510	L1M5	-	LINE/L1	L1M5	0.571024	0.581771	0.576398	-1.01882	0.962689	No	0	ENSG00000143776	CDC42BPA	Intronic	2.77878	1.35882	2.0688	2.04499	0.0952777	No	0.536704	0.642736	0.58972	-1.19756	0.102343	No
chr1:227777155-227784355:Harlequin-int	chr1	227777155	227784355	LTR2|Harlequin-int|Harlequin-int|Harlequin-int|Harlequin-int|LTR2	-	LTR/ERV1	Harlequin-int	1.00123	1.61263	1.30693	-1.61065	0.49728	No	0	ENSG00000181450	ZNF678	Intronic	0.592002	0.640152	0.616077	-1.08133	0.519903	No	1.05928	1.80453	1.43191	-1.70355	0.272453	No
chr1:227823266-227829050:HERVH48-int	chr1	227823266	227829050	MER48|HERVH48-int|HERVH48-int|MER48	-	LTR/ERV1	HERVH48-int	2.19427	1.64102	1.91765	1.33714	0.702636	No	0	ENSG00000181450	ZNF678	Intronic	0.536393	0.657595	0.596994	-1.22596	0.0952777	No	2.06789	3.01515	2.54152	-1.45808	0.404401	No
chr1:227863377-227864169:L1MEd	chr1	227863377	227864169	L1MEd	+	LINE/L1	L1MEd	2.05961	11.3482	6.7039	-5.50988	0.00268926	Yes	0	ENSG00000181450	ZNF678	Intronic	2.22068	11.7191	6.9699	-5.27726	7.50792e-05	Yes	0.536704	0.654889	0.595796	-1.22021	0.102343	No
chr1:2279513-2279743:L1MC4	chr1	2279513	2279743	L1MC4	-	LINE/L1	L1MC4	2.51809	1.82769	2.17289	1.37774	0.642677	No	0	ENSG00000116151	MORN1	Intronic	5.74017	8.40267	7.07142	-1.46384	0.372221	No	0.553941	0.640414	0.597177	-1.15611	0.188605	No
chr1:227969240-227969451:MLT1C2	chr1	227969240	227969451	MLT1C2|MLT1C2	-	LTR/ERVL-MaLR	MLT1C2	23.9731	23.2934	23.6333	1.02918	0.951451	No	314	ENSG00000143740	SNAP47	afterGene	0.536393	0.640152	0.588272	-1.19344	0.0952777	No	16.5639	16.9148	16.7393	-1.02119	0.949383	No
chr1:227970335-227971273:L1MC	chr1	227970335	227971273	L1MC	+	LINE/L1	L1MC	89.5607	65.3943	77.4775	1.36955	0.297111	No	1409	ENSG00000143740	SNAP47	afterGene	103.867	82.3777	93.1223	1.26086	0.203061	No	0.943565	1.06283	1.0032	-1.1264	0.782521	No
chr1:227971693-227972419:L1MA2	chr1	227971693	227972419	L1MA2	-	LINE/L1	L1MA2	25.9925	22.2723	24.1324	1.16703	0.675997	No	2767	ENSG00000143740	SNAP47	afterGene	1.59384	1.45931	1.52658	1.09219	0.856192	No	64.6712	51.7576	58.2144	1.2495	0.290183	No
chr1:227978283-227978587:AluSx1	chr1	227978283	227978587	AluSx1	-	SINE/Alu	AluSx1	6.54217	0.725394	3.63378	9.01878	0.000118863	Yes	9357	ENSG00000143740	SNAP47	Intergenic	0.536393	0.640152	0.588272	-1.19344	0.0952777	No	9.03641	1.61866	5.32753	5.58264	0.000204393	Yes
chr1:228299842-228302016:MER57-int	chr1	228299842	228302016	MER57A1|MER57-int	-	LTR/ERV1	MER57-int	12.5735	2.63284	7.60317	4.77565	0.0126469	Yes	-2830	ENSG00000162910	MRPL55	Intergenic	0.702387	0.723893	0.71314	-1.03062	0.893871	No	33.9802	25.1709	29.5755	1.34998	0.211388	No
chr1:228306632-228309307:MER57-int	chr1	228306632	228309307	MER57-int|MER57-int|MER57A1	-	LTR/ERV1	MER57-int	15.625	2.74333	9.18417	5.69564	0.00394212	Yes	-9620	ENSG00000162910	MRPL55	Intergenic	0.796419	0.777596	0.787008	1.02421	0.93102	No	42.9148	29.3996	36.1572	1.45971	0.19721	No
chr1:228341692-228342812:L1MC3	chr1	228341692	228342812	L1MC3	-	LINE/L1	L1MC3	4.68874	1.88509	3.28692	2.48727	0.200898	No	0	ENSG00000198835	GJC2	Intronic	0.570314	0.664856	0.617585	-1.16577	0.245425	No	5.83791	5.72643	5.78217	1.01947	0.964135	No
chr1:228370955-228371233:L1MD1	chr1	228370955	228371233	L1MD1	-	LINE/L1	L1MD1	14.2855	6.61235	10.4489	2.16043	0.242858	No	998	ENSG00000181873	IBA57	afterGene	0.536393	0.640152	0.588272	-1.19344	0.0952777	No	19.6633	29.0782	24.3707	-1.47881	0.102343	No
chr1:228371690-228372048:MLT1B	chr1	228371690	228372048	MLT1B	+	LTR/ERVL-MaLR	MLT1B	9.45415	10.8307	10.1424	-1.1456	0.775026	No	1733	ENSG00000181873	IBA57	afterGene	40.8966	44.7595	42.8281	-1.09446	0.704366	No	0.56344	0.661752	0.612596	-1.17449	0.190013	No
chr1:228386920-228388043:L1M4b	chr1	228386920	228388043	L1M4b	-	LINE/L1	L1M4b	4.08339	8.49921	6.2913	-2.08141	0.185601	No	3165	ENSG00000162913	C1orf145	afterGene	2.66016	3.149	2.90458	-1.18376	0.703019	No	9.30842	29.1834	19.2459	-3.13516	0.000203802	Yes
chr1:228390948-228391170:L1MA4	chr1	228390948	228391170	L1MA4	+	LINE/L1	L1MA4	2.44726	3.41059	2.92893	-1.39363	0.554372	No	38	ENSG00000162913	C1orf145	afterGene	8.51894	11.5561	10.0375	-1.35651	0.369903	No	0.896345	0.752433	0.824389	1.19126	0.549369	No
chr1:228449182-228450981:L1M5	chr1	228449182	228450981	L1M5	+	LINE/L1	L1M5	1.22659	1.31714	1.27186	-1.07382	0.913045	No	0	ENSG00000154358	OBSCN	Intronic	1.03911	1.50113	1.27012	-1.44464	0.344533	No	1.78884	3.06807	2.42846	-1.71512	0.199137	No
chr1:228453793-228454614:L1M5	chr1	228453793	228454614	L1M5	+	LINE/L1	L1M5	0.823755	3.42456	2.12416	-4.15725	0.0138947	Yes	0	ENSG00000154358	OBSCN	Intronic	1.26774	6.48083	3.87429	-5.11211	7.10917e-05	Yes	2.73798	6.27614	4.50706	-2.29225	0.0515538	No
chr1:228454914-228455799:L1M5	chr1	228454914	228455799	L1M5	+	LINE/L1	L1M5	1.85389	4.28459	3.06924	-2.31114	0.194064	No	0	ENSG00000154358	OBSCN	Intronic	0.856676	5.63556	3.24612	-6.57841	7.14776e-06	Yes	2.41237	8.20868	5.31052	-3.40274	0.00196839	Yes
chr1:228568703-228569217:L1MD1	chr1	228568703	228569217	L1MD1	-	LINE/L1	L1MD1	1.29803	4.66029	2.97916	-3.59028	0.0273353	Yes	2127	ENSG00000154358	OBSCN	afterGene	1.25767	5.39343	3.32555	-4.28845	0.000442844	Yes	1.91073	7.80969	4.86021	-4.08729	0.0017266	Yes
chr1:2285742-2285996:AluJb	chr1	2285742	2285996	AluJb	+	SINE/Alu	AluJb	4.01179	1.81652	2.91416	2.2085	0.175311	No	0	ENSG00000116151	MORN1	Intronic	0.536393	0.640152	0.588272	-1.19344	0.0952777	No	5.5749	4.19666	4.88578	1.32841	0.487624	No
chr1:228646554-228646861:AluSc8	chr1	228646554	228646861	AluSc8	-	SINE/Alu	AluSc8	7.22499	3.72485	5.47492	1.93967	0.228238	No	296	ENSG00000196890	HIST3H2BB	afterGene	0.619763	0.767799	0.693781	-1.23886	0.308562	No	4.77338	6.63491	5.70414	-1.38998	0.405986	No
chr1:228648144-228648927:Charlie2b	chr1	228648144	228648927	Charlie2b	-	DNA/hAT-Charlie	Charlie2b	5.4987	6.76479	6.13174	-1.23025	0.690043	No	1886	ENSG00000196890	HIST3H2BB	afterGene	0.568695	2.94936	1.75903	-5.18618	2.54894e-05	Yes	9.54803	14.473	12.0105	-1.51581	0.269234	No
chr1:228649933-228650754:L1MA4	chr1	228649933	228650754	L1MA4	+	LINE/L1	L1MA4	8.21985	8.03493	8.12739	1.02301	0.967543	No	3675	ENSG00000196890	HIST3H2BB	afterGene	33.7538	14.7468	24.2503	2.28889	0.028527	Yes	0.665214	9.84692	5.25607	-14.8026	2.06224e-08	Yes
chr1:228784578-228784907:AluSx	chr1	228784578	228784907	AluSx	-	SINE/Alu	AluSx	1.17792	5.01002	3.09397	-4.25329	0.033438	Yes	-85918	ENSG00000116574	RHOU	Intergenic	0.536393	0.640152	0.588272	-1.19344	0.0952777	No	1.36958	4.78109	3.07534	-3.49092	0.0280938	Yes
chr1:228784917-228785883:MER101-int	chr1	228784917	228785883	MER101-int	+	LTR/ERV1	MER101-int	2.02994	7.79201	4.91098	-3.83853	0.0517428	No	-84942	ENSG00000116574	RHOU	Intergenic	7.79852	15.3725	11.5855	-1.97121	0.0952777	No	0.536704	0.642394	0.589549	-1.19693	0.102343	No
chr1:228790143-228790853:MER65-int	chr1	228790143	228790853	MER65-int	+	LTR/ERV1	MER65-int	0.572341	1.5543	1.06332	-2.71569	0.0567521	No	-79972	ENSG00000116574	RHOU	Intergenic	1.50439	3.25029	2.37734	-2.16053	0.0952777	No	0.536704	0.640414	0.588559	-1.19324	0.102343	No
chr1:228791149-228791909:MER65-int	chr1	228791149	228791909	MER65-int|MER65A	+	LTR/ERV1	MER65-int	0.685316	0.993435	0.839376	-1.4496	0.4873	No	-78916	ENSG00000116574	RHOU	Intergenic	1.12132	2.64997	1.88565	-2.36327	0.0754266	No	0.583239	0.640414	0.611826	-1.09803	0.433051	No
chr1:228792119-228792740:L1M4c	chr1	228792119	228792740	L1M4c	+	LINE/L1	L1M4c	1.28864	0.865139	1.07689	1.48951	0.420394	No	-78085	ENSG00000116574	RHOU	Intergenic	1.8705	1.44406	1.65728	1.29531	0.58447	No	0.536704	0.640414	0.588559	-1.19324	0.102343	No
chr1:228793057-228793667:L1M4c	chr1	228793057	228793667	L1M4c	+	LINE/L1	L1M4c	0.572552	1.23188	0.902218	-2.15157	0.100693	No	-77158	ENSG00000116574	RHOU	Intergenic	1.5205	1.83452	1.67751	-1.20652	0.697658	No	0.536704	0.640414	0.588559	-1.19324	0.102343	No
chr1:228796701-228798553:L1PA6	chr1	228796701	228798553	L1PA6	+	LINE/L1	L1PA6	0.795307	2.7145	1.75491	-3.41315	0.0678534	No	-72272	ENSG00000116574	RHOU	Intergenic	7.58232	10.3935	8.98789	-1.37075	0.483362	No	0.544896	0.640414	0.592655	-1.1753	0.135017	No
chr1:229399669-229399986:L2a	chr1	229399669	229399986	L2a	-	LINE/L2	L2a	22.1205	5.12959	13.625	4.31232	0.00314966	Yes	-6837	ENSG00000168118	RAB4A	Intergenic	95.7094	30.2139	62.9617	3.16773	9.53324e-06	Yes	0.536704	0.640414	0.588559	-1.19324	0.102343	No
chr1:229399987-229400523:MLT2A2	chr1	229399987	229400523	MLT2A2	+	LTR/ERVL	MLT2A2	61.3595	16.8829	39.1212	3.63442	0.000192675	Yes	-6300	ENSG00000168118	RAB4A	Intergenic	0.726149	0.646545	0.686347	1.12312	0.43619	No	146.289	55.0983	100.694	2.65506	6.44912e-06	Yes
chr1:229401157-229402581:L1MEc	chr1	229401157	229402581	L1MEc	+	LINE/L1	L1MEc	70.4405	18.8804	44.6605	3.73087	3.42912e-05	Yes	-4242	ENSG00000168118	RAB4A	Intergenic	0.536393	0.640152	0.588272	-1.19344	0.0952777	No	82.8136	48.0132	65.4134	1.72481	0.0423466	No
chr1:229403782-229404173:MLT1I	chr1	229403782	229404173	MLT1I	+	LTR/ERVL-MaLR	MLT1I	25.6719	7.11592	16.3939	3.60767	0.00353569	Yes	-2650	ENSG00000168118	RAB4A	Intergenic	0.536393	0.640152	0.588272	-1.19344	0.0952777	No	28.3234	8.01489	18.1692	3.53385	0.00326655	Yes
chr1:229435995-229437157:L2c	chr1	229435995	229437157	L2c	-	LINE/L2	L2c	3.83961	0.807152	2.32338	4.75698	0.00550012	Yes	0	ENSG00000168118	RAB4A	Intronic	0.544596	0.682965	0.61378	-1.25408	0.0952777	No	2.57979	2.41391	2.49685	1.06872	0.901116	No
chr1:229451496-229452261:L1MEf	chr1	229451496	229452261	L1MEf	-	LINE/L1	L1MEf	12.6434	5.32353	8.98346	2.375	0.0740557	No	4498	ENSG00000154429	CCSAP	afterGene	0.697959	1.74806	1.22301	-2.50454	0.00765644	Yes	24.2998	12.7155	18.5076	1.91104	0.0919037	No
chr1:229471980-229473425:HAL1	chr1	229471980	229473425	HAL1	+	LINE/L1	HAL1	3.9029	1.71496	2.80893	2.27579	0.293488	No	0	ENSG00000154429	CCSAP	Intronic	0.813924	0.909671	0.861797	-1.11764	0.789036	No	1.73352	1.94608	1.8398	-1.12262	0.82635	No
chr1:229474323-229475489:HAL1	chr1	229474323	229475489	HAL1	+	LINE/L1	HAL1	3.41079	1.54003	2.47541	2.21475	0.294049	No	0	ENSG00000154429	CCSAP	Intronic	0.903561	0.925657	0.914609	-1.02445	0.959636	No	1.68104	2.10009	1.89057	-1.24928	0.677925	No
chr1:229548165-229554412:HERVH-int	chr1	229548165	229554412	LTR7|HERVH-int|HERVH-int|HERVH-int|HERVH-int|HERVH-int|LTR7	+	LTR/ERV1	HERVH-int	6.49854	0.634562	3.56655	10.241	1.38754e-05	Yes	12581	ENSG00000143632	ACTA1	Intergenic	28.4014	1.01493	14.7081	27.9835	6.68427e-11	Yes	0.619599	0.644613	0.632106	-1.04037	0.77434	No
chr1:2295766-2297146:L1PA3	chr1	2295766	2297146	L1PA3	-	LINE/L1	L1PA3	7.63461	2.61372	5.12416	2.92098	0.1001	No	0	ENSG00000116151	MORN1	Intronic	38.4925	29.3373	33.9149	1.31206	0.346315	No	0.604408	0.68956	0.646984	-1.14089	0.410804	No
chr1:2299630-2300073:MER66B	chr1	2299630	2300073	MER66B	-	LTR/ERV1	MER66B	13.5993	9.34662	11.473	1.455	0.543764	No	0	ENSG00000116151	MORN1	Intronic	17.6392	19.3341	18.4867	-1.09609	0.763336	No	0.553941	0.659803	0.606872	-1.19111	0.141146	No
chr1:2300910-2302089:L1M4	chr1	2300910	2302089	L1M4	+	LINE/L1	L1M4	18.7461	11.2854	15.0158	1.66109	0.346833	No	0	ENSG00000116151	MORN1	Intronic	0.536393	0.656127	0.59626	-1.22322	0.0952777	No	17.5614	23.7544	20.6579	-1.35265	0.303387	No
chr1:230451008-230451364:L3	chr1	230451008	230451364	L3	-	LINE/CR1	L3	101.998	22.5571	62.2775	4.52177	0.000293475	Yes	6029	ENSG00000177614	PGBD5	Intergenic	163.173	26.2322	94.7027	6.22035	1.70855e-11	Yes	0.660942	0.640414	0.650678	1.03205	0.834797	No
chr1:230455595-230455906:AluSx4	chr1	230455595	230455906	AluSx4	-	SINE/Alu	AluSx4	35.5233	9.42009	22.4717	3.77101	0.00272113	Yes	1487	ENSG00000177614	PGBD5	afterGene	18.1149	6.39332	12.2541	2.83342	0.0165785	Yes	0.536704	0.670152	0.603428	-1.24864	0.102343	No
chr1:230457078-230457349:AluJr	chr1	230457078	230457349	AluJr	-	SINE/Alu	AluJr	39.9308	11.2951	25.613	3.53524	0.00474297	Yes	44	ENSG00000177614	PGBD5	afterGene	28.5085	4.66969	16.5891	6.10501	3.94768e-06	Yes	0.544896	0.640414	0.592655	-1.1753	0.135017	No
chr1:230475166-230475876:L1MA8	chr1	230475166	230475876	L1MA8	+	LINE/L1	L1MA8	1.76961	0.713105	1.24136	2.48155	0.0924839	No	0	ENSG00000177614	PGBD5	Intronic	0.645038	1.53613	1.09058	-2.38145	0.0121673	Yes	3.75978	2.17354	2.96666	1.7298	0.223848	No
chr1:230840628-230840814:L1MB3	chr1	230840628	230840814	L1MB3	+	LINE/L1	L1MB3	1.56698	0.464021	1.0155	3.37697	0.00196012	Yes	0	ENSG00000135744	AGT	Intronic	0.536393	0.640152	0.588272	-1.19344	0.0952777	No	3.18592	0.642587	1.91426	4.95797	0.000132997	Yes
chr1:230840817-230841024:L1MB3	chr1	230840817	230841024	L1MB3	+	LINE/L1	L1MB3	1.06188	0.507901	0.784892	2.09073	0.0452623	Yes	0	ENSG00000135744	AGT	Intronic	0.544596	0.642131	0.593363	-1.1791	0.124364	No	4.76568	0.666032	2.71586	7.15534	1.88515e-05	Yes
chr1:230932790-230932938:MER5B	chr1	230932790	230932938	MER5B	+	DNA/hAT-Charlie	MER5B	5.87325	0.556132	3.21469	10.5609	6.5614e-06	Yes	0	ENSG00000135773	CAPN9	Intronic	0.556911	0.693728	0.62532	-1.24567	0.127035	No	7.76025	1.04185	4.40105	7.44853	4.49845e-05	Yes
chr1:230932947-230933266:L1MC5a	chr1	230932947	230933266	L1MC5a	-	LINE/L1	L1MC5a	6.54104	0.716186	3.62861	9.13316	0.000406154	Yes	0	ENSG00000135773	CAPN9	Intronic	13.4141	1.04814	7.23114	12.7981	3.41677e-07	Yes	0.560789	0.660302	0.610546	-1.17745	0.158539	No
chr1:230933350-230933491:MIR3	chr1	230933350	230933491	MIR3	-	SINE/MIR	MIR3	4.67121	0.533466	2.60234	8.75633	5.41172e-05	Yes	0	ENSG00000135773	CAPN9	Intronic	5.36544	0.746944	3.05619	7.1832	9.51971e-06	Yes	0.602534	0.640414	0.621474	-1.06287	0.632144	No
chr1:230934097-230934249:MIR	chr1	230934097	230934249	MIR	-	SINE/MIR	MIR	5.11157	0.464751	2.78816	10.9985	5.36121e-07	Yes	0	ENSG00000135773	CAPN9	Intronic	4.34781	0.769052	2.55843	5.65347	0.000138718	Yes	0.544896	0.675145	0.610021	-1.23904	0.102343	No
chr1:230934522-230934676:MER5A1	chr1	230934522	230934676	MER5A1	+	DNA/hAT-Charlie	MER5A1	5.18382	0.545343	2.86458	9.50561	2.24905e-05	Yes	0	ENSG00000135773	CAPN9	Intronic	0.536393	0.642131	0.589262	-1.19713	0.0952777	No	4.10656	0.807954	2.45726	5.08267	0.000217572	Yes
chr1:230936415-230936564:MER5B	chr1	230936415	230936564	MER5B	+	DNA/hAT-Charlie	MER5B	3.21137	0.50964	1.86051	6.30127	6.30532e-05	Yes	0	ENSG00000135773	CAPN9	Intronic	0.624544	0.640152	0.632348	-1.02499	0.892049	No	2.87112	0.69637	1.78375	4.12298	0.000450548	Yes
chr1:231062550-231064462:L1ME3F	chr1	231062550	231064462	L1ME3F	-	LINE/L1	L1ME3F	2.40209	1.06234	1.73221	2.26112	0.280573	No	0	ENSG00000143643	TTC13	Intronic	16.8542	20.4137	18.634	-1.21119	0.615591	No	0.559337	0.749561	0.654449	-1.34009	0.102343	No
chr1:231074600-231075038:L2d2	chr1	231074600	231075038	L2d2	+	LINE/L2	L2d2	3.17945	1.08122	2.13034	2.94061	0.0843608	No	0	ENSG00000143643	TTC13	Intronic	0.536393	0.643335	0.589864	-1.19937	0.0952777	No	2.52247	4.68028	3.60138	-1.85543	0.192765	No
chr1:231347703-231348345:LTR6A	chr1	231347703	231348345	LTR6A	-	LTR/ERV1	LTR6A	0.982831	4.44744	2.71513	-4.52513	0.0126932	Yes	0	ENSG00000119283	TRIM67	Intronic	0.734086	1.04213	0.888106	-1.41962	0.30558	No	0.729096	5.39832	3.06371	-7.40414	8.10747e-05	Yes
chr1:231349191-231349491:AluJb	chr1	231349191	231349491	AluJb	+	SINE/Alu	AluJb	0.68524	4.52523	2.60523	-6.60386	0.00228153	Yes	0	ENSG00000119283	TRIM67	Intronic	0.652466	3.58911	2.12079	-5.50084	0.000201201	Yes	0.544896	0.659803	0.602349	-1.21088	0.104237	No
chr1:231464019-231464862:L1ME3G	chr1	231464019	231464862	L1ME3G	+	LINE/L1	L1ME3G	6.78402	13.5951	10.1896	-2.00399	0.124717	No	3619	ENSG00000116903	EXOC8	afterGene	0.705024	0.691961	0.698493	1.01888	0.932513	No	20.6676	34.3456	27.5066	-1.6618	0.101669	No
chr1:231464990-231465309:MER2	chr1	231464990	231465309	MER2	+	DNA/TcMar-Tigger	MER2	7.34127	14.5236	10.9325	-1.97835	0.0573879	No	3172	ENSG00000116903	EXOC8	afterGene	0.544596	0.643335	0.593965	-1.18131	0.121117	No	18.1291	32.2859	25.2075	-1.78089	0.0234303	No
chr1:231466039-231466182:L1ME3G	chr1	231466039	231466182	L1ME3G	+	LINE/L1	L1ME3G	1.52562	1.71133	1.61847	-1.12173	0.864582	No	2299	ENSG00000116903	EXOC8	afterGene	0.536393	0.640152	0.588272	-1.19344	0.0952777	No	2.75489	5.33006	4.04248	-1.93476	0.102343	No
chr1:231697282-231697490:MIRb	chr1	231697282	231697490	MIRb	-	SINE/MIR	MIRb	3.77114	2.35644	3.06379	1.60036	0.473267	No	0	ENSG00000116918	TSNAX	Intronic	0.536393	0.640152	0.588272	-1.19344	0.0952777	No	5.23828	8.62442	6.93135	-1.64642	0.196207	No
chr1:231698650-231698769:MIR3	chr1	231698650	231698769	MIR3	+	SINE/MIR	MIR3	5.01692	2.64115	3.82903	1.89952	0.279357	No	0	ENSG00000116918	TSNAX	Intronic	4.81389	6.79699	5.80544	-1.41195	0.329129	No	0.536704	0.640414	0.588559	-1.19324	0.102343	No
chr1:23224640-23225356:L2a	chr1	23224640	23225356	L2a	-	LINE/L2	L2a	1.13593	1.05717	1.09655	1.0745	0.917807	No	0	ENSG00000133216	EPHB2	Intronic	0.536393	0.705754	0.621074	-1.31574	0.0952777	No	6.83507	17.3686	12.1018	-2.5411	0.00238337	Yes
chr1:232568465-232569274:L1ME3B	chr1	232568465	232569274	L1ME3B	+	LINE/L1	L1ME3B	2.31341	1.38654	1.84998	1.66847	0.472815	No	0	ENSG00000116991	SIPA1L2	Intronic	0.536393	0.666263	0.601328	-1.24212	0.0952777	No	8.01891	22.0805	15.0497	-2.75355	0.00325524	Yes
chr1:233194374-233194401:L2c	chr1	233194374	233194401	L2c	+	LINE/L2	L2c	0.68904	0.463704	0.576372	1.48595	0.106588	No	0	ENSG00000135749	PCNXL2	Intronic	0.544596	0.640152	0.592374	-1.17546	0.127035	No	2.91927	1.87696	2.39812	1.55532	0.337868	No
chr1:233194709-233195014:L2b	chr1	233194709	233195014	L2b	+	LINE/L2	L2b	5.30251	1.47928	3.3909	3.58451	0.0581621	No	0	ENSG00000135749	PCNXL2	Intronic	0.787269	0.709908	0.748588	1.10897	0.703536	No	34.542	21.9951	28.2685	1.57044	0.102343	No
chr1:233199218-233200569:L1MEd	chr1	233199218	233200569	L1MEd	-	LINE/L1	L1MEd	6.36708	2.73161	4.54934	2.33089	0.229404	No	0	ENSG00000135749	PCNXL2	Intronic	7.93163	13.6456	10.7886	-1.72041	0.167686	No	0.62491	0.647502	0.636206	-1.03615	0.809133	No
chr1:233761332-233762154:L2a	chr1	233761332	233762154	L2a	-	LINE/L2	L2a	1.39917	0.463936	0.931552	3.01587	0.000354914	Yes	0	ENSG00000135750	KCNK1	Intronic	0.544596	0.640152	0.592374	-1.17546	0.127035	No	2.11775	0.652339	1.38505	3.2464	0.00315505	Yes
chr1:233780094-233780658:L2a	chr1	233780094	233780658	L2a	-	LINE/L2	L2a	1.87131	0.463873	1.16759	4.0341	9.13562e-05	Yes	0	ENSG00000135750	KCNK1	Intronic	0.536393	0.642131	0.589262	-1.19713	0.0952777	No	1.69262	0.63814	1.16538	2.65242	0.0046587	Yes
chr1:233801010-233801719:LTR62	chr1	233801010	233801719	LTR62	-	LTR/ERVL	LTR62	0.88909	0.506601	0.697845	1.75501	0.0481411	No	0	ENSG00000135750	KCNK1	Intronic	0.578227	0.647556	0.612892	-1.1199	0.520155	No	2.28865	0.704777	1.49671	3.24734	0.00720205	Yes
chr1:233806150-233806508:THE1B	chr1	233806150	233806508	THE1B	-	LTR/ERVL-MaLR	THE1B	1.12955	0.464279	0.796915	2.43292	0.00358875	Yes	0	ENSG00000135750	KCNK1	Intronic	0.652706	0.693643	0.673175	-1.06272	0.746443	No	4.94406	0.846794	2.89543	5.83856	0.000567382	Yes
chr1:233808742-233808984:LTR48B	chr1	233808742	233808984	LTR48B	-	LTR/ERV1	LTR48B	15.464	0.728694	8.09636	21.2216	2.1741e-06	Yes	485	ENSG00000135750	KCNK1	afterGene	0.544596	0.645116	0.594856	-1.18458	0.116335	No	7.30209	0.731779	4.01694	9.97854	5.53553e-06	Yes
chr1:233810958-233811188:Tigger15a	chr1	233810958	233811188	Tigger15a	+	DNA/TcMar-Tigger	Tigger15a	6.92777	0.670233	3.799	10.3364	2.0372e-05	Yes	2701	ENSG00000135750	KCNK1	afterGene	21.2594	1.03914	11.1493	20.4587	3.89583e-09	Yes	0.536704	0.65052	0.593612	-1.21207	0.102343	No
chr1:233811203-233811577:MER57E1	chr1	233811203	233811577	MER57E1	-	LTR/ERV1	MER57E1	19.943	0.601674	10.2723	33.1459	1.14571e-07	Yes	2946	ENSG00000135750	KCNK1	afterGene	0.544596	0.650433	0.597514	-1.19434	0.102143	No	32.7165	1.37059	17.0435	23.8704	1.24707e-09	Yes
chr1:233811614-233811865:Charlie31a	chr1	233811614	233811865	Charlie31a	-	DNA/hAT-Charlie	Charlie31a	18.8504	0.631481	9.74093	29.8511	2.61834e-07	Yes	3357	ENSG00000135750	KCNK1	afterGene	0.536393	0.66393	0.600161	-1.23777	0.0952777	No	30.2226	1.03348	15.6281	29.2435	2.20359e-10	Yes
chr1:233812466-233813305:MER4D1	chr1	233812466	233813305	MER4D1	-	LTR/ERV1	MER4D1	24.3482	0.714606	12.5314	34.0722	1.9822e-07	Yes	4209	ENSG00000135750	KCNK1	afterGene	0.624824	0.652546	0.638685	-1.04437	0.762672	No	33.2575	0.927849	17.0927	35.8437	1.68547e-10	Yes
chr1:233819195-233824390:HERVH-int	chr1	233819195	233824390	LTR7|HERVH-int|HERVH-int|HERVH-int|HERVH-int|HERVH-int	-	LTR/ERV1	HERVH-int	4.01139	0.506351	2.25887	7.92215	0.000160575	Yes	10938	ENSG00000135750	KCNK1	Intergenic	1.23126	0.73335	0.982305	1.67895	0.145738	No	4.6192	0.76036	2.68978	6.07502	0.000255245	Yes
chr1:23405225-23405372:MIR	chr1	23405225	23405372	MIR	+	SINE/MIR	MIR	12.1901	2.86112	7.5256	4.26061	0.0150802	Yes	0	ENSG00000004487	KDM1A	Intronic	6.1075	29.9182	18.0128	-4.8986	1.11978e-07	Yes	29.2261	15.3554	22.2907	1.90332	0.0541796	No
chr1:234057427-234062753:L1PA5	chr1	234057427	234062753	L1PA5	-	LINE/L1	L1PA5	0.795097	0.612719	0.703908	1.29765	0.560257	No	0	ENSG00000183780	SLC35F3	Intronic	0.544596	0.689199	0.616897	-1.26552	0.0952777	No	1.12965	1.32541	1.22753	-1.17329	0.744527	No
chr1:23406830-23407269:L2b	chr1	23406830	23407269	L2b	+	LINE/L2	L2b	16.0897	8.88807	12.4889	1.81026	0.175802	No	0	ENSG00000004487	KDM1A	Intronic	15.7652	71.7528	43.759	-4.55134	4.84161e-08	Yes	21.5843	11.9171	16.7507	1.8112	0.0509639	No
chr1:234461401-234461709:AluJr	chr1	234461401	234461709	AluJr	+	SINE/Alu	AluJr	2.14717	0.507991	1.32758	4.22678	0.000187147	Yes	1140	ENSG00000183780	SLC35F3	afterGene	3.66967	0.812244	2.24096	4.51794	0.000922159	Yes	0.995304	0.668215	0.831759	1.4895	0.1336	No
chr1:234461887-234462225:L1MB3	chr1	234461887	234462225	L1MB3	+	LINE/L1	L1MB3	3.57823	0.507842	2.04304	7.04596	3.71426e-05	Yes	1626	ENSG00000183780	SLC35F3	afterGene	12.0601	0.836786	6.44842	14.4124	2.72326e-08	Yes	0.536704	0.640414	0.588559	-1.19324	0.102343	No
chr1:234469817-234470585:L1MC4	chr1	234469817	234470585	L1MC4	+	LINE/L1	L1MC4	1.28795	0.508143	0.898049	2.53463	0.00308142	Yes	9556	ENSG00000183780	SLC35F3	Intergenic	14.6264	1.03104	7.82874	14.1861	2.55286e-07	Yes	0.659731	0.640414	0.650073	1.03016	0.853598	No
chr1:234471369-234473936:L1MB4	chr1	234471369	234473936	L1MB4	+	LINE/L1	L1MB4	4.25924	0.634529	2.44688	6.71244	0.000367586	Yes	11108	ENSG00000183780	SLC35F3	Intergenic	10.7921	1.35396	6.07304	7.9708	8.38675e-05	Yes	0.553941	0.721782	0.637862	-1.303	0.102343	No
chr1:234475093-234476978:L1MB4	chr1	234475093	234476978	L1MB4	+	LINE/L1	L1MB4	2.24155	0.465101	1.35332	4.81949	0.000236898	Yes	14832	ENSG00000183780	SLC35F3	Intergenic	8.19326	1.31395	4.7536	6.2356	0.00037379	Yes	0.544896	0.659803	0.602349	-1.21088	0.104237	No
chr1:234505208-234506070:L1ME3B	chr1	234505208	234506070	L1ME3B	-	LINE/L1	L1ME3B	2.80024	1.1303	1.96527	2.47743	0.173689	No	-3133	ENSG00000168275	COA6	Intergenic	0.544596	0.741697	0.643147	-1.36192	0.0952777	No	24.3749	9.68419	17.0295	2.51697	0.0192032	Yes
chr1:234543992-234544677:LTR8	chr1	234543992	234544677	LTR8	+	LTR/ERV1	LTR8	25.4388	10.1871	17.813	2.49715	0.298414	No	0	ENSG00000059588	TARBP1	Intronic	1.03579	1.47088	1.25334	-1.42006	0.387694	No	232.09	223.202	227.646	1.03982	0.90001	No
chr1:234608755-234609703:HAL1	chr1	234608755	234609703	HAL1	+	LINE/L1	HAL1	3.23115	2.38389	2.80752	1.35541	0.749445	No	0	ENSG00000059588	TARBP1	Intronic	0.536393	0.640152	0.588272	-1.19344	0.0952777	No	9.75137	22.9264	16.3389	-2.35109	0.0703357	No
chr1:234610541-234612015:L1MCc	chr1	234610541	234612015	L1MCc	+	LINE/L1	L1MCc	8.07199	3.01659	5.54429	2.67587	0.19826	No	0	ENSG00000059588	TARBP1	Intronic	0.536393	0.640152	0.588272	-1.19344	0.0952777	No	10.5405	25.3889	17.9647	-2.40869	0.0647338	No
chr1:235268830-235269122:AluSz	chr1	235268830	235269122	AluSz	+	SINE/Alu	AluSz	17.109	9.2366	13.1728	1.85231	0.168408	No	3530	ENSG00000173726	TOMM20	afterGene	0.536393	0.640152	0.588272	-1.19344	0.0952777	No	9.37831	6.63219	8.00525	1.41406	0.2675	No
chr1:235495391-235495852:L1PB4	chr1	235495391	235495852	L1PB4	-	LINE/L1	L1PB4	2.63439	16.9563	9.79537	-6.43652	0.000262743	Yes	0	ENSG00000152904	GGPS1	Intronic	0.536393	0.640152	0.588272	-1.19344	0.0952777	No	5.13163	31.7799	18.4558	-6.19294	5.92005e-09	Yes
chr1:235610844-235610932:MIR3	chr1	235610844	235610932	MIR3	-	SINE/MIR	MIR3	15.0288	23.8825	19.4557	-1.58912	0.180283	No	0	ENSG00000116957	TBCE	Intronic	47.1402	57.1264	52.1333	-1.21184	0.431764	No	1.56413	2.11976	1.84194	-1.35524	0.478804	No
chr1:235611246-235611555:AluSg	chr1	235611246	235611555	AluSg	+	SINE/Alu	AluSg	14.0975	24.0948	19.0961	-1.70916	0.11924	No	0	ENSG00000116957	TBCE	Intronic	1.33372	3.57801	2.45587	-2.68273	0.032553	Yes	34.5201	71.4552	52.9876	-2.06996	0.00202769	Yes
chr1:235927057-235927660:L2c	chr1	235927057	235927660	L2c	+	LINE/L2	L2c	1.11626	0.653301	0.88478	1.70864	0.196544	No	0	ENSG00000143669	LYST	Intronic	0.536393	0.689199	0.612796	-1.28488	0.0952777	No	6.41741	3.00395	4.71068	2.13632	0.102343	No
chr1:236035314-236035619:AluSx	chr1	236035314	236035619	AluSx	+	SINE/Alu	AluSx	4.24069	0.600439	2.42057	7.06266	0.000346447	Yes	0	ENSG00000143669	LYST	Intronic	0.536393	0.640152	0.588272	-1.19344	0.0952777	No	17.3804	1.25062	9.31551	13.8974	5.51951e-06	Yes
chr1:236035620-236035949:MER39	chr1	236035620	236035949	MER39	-	LTR/ERV1	MER39	8.47956	0.561204	4.52038	15.1096	3.57798e-06	Yes	0	ENSG00000143669	LYST	Intronic	16.9628	1.24926	9.10602	13.5783	4.93815e-06	Yes	0.553941	0.640414	0.597177	-1.15611	0.188605	No
chr1:236349652-236356092:L1PA7	chr1	236349652	236356092	L1PA7	-	LINE/L1	L1PA7	4.75007	5.68356	5.21682	-1.19652	0.840164	No	0	ENSG00000077585	GPR137B	Intronic	0.605542	0.699704	0.652623	-1.1555	0.33516	No	3.67274	17.1045	10.3886	-4.65715	0.000933078	Yes
chr1:236361805-236365708:L1PB1	chr1	236361805	236365708	L1PB1	-	LINE/L1	L1PB1	2.35621	3.06673	2.71147	-1.30155	0.772722	No	0	ENSG00000077585	GPR137B	Intronic	0.696047	0.65308	0.674563	1.06579	0.698299	No	2.41305	19.6089	11.011	-8.12621	4.0296e-05	Yes
chr1:236376892-236377169:L1ME4b	chr1	236376892	236377169	L1ME4b	+	LINE/L1	L1ME4b	7.17547	11.7772	9.47634	-1.64132	0.297924	No	0	ENSG00000077585	GPR137B	Intronic	9.11337	10.7154	9.91439	-1.17579	0.71096	No	0.56344	0.700818	0.632129	-1.24382	0.131286	No
chr1:236377189-236377531:L1ME4b	chr1	236377189	236377531	L1ME4b	+	LINE/L1	L1ME4b	9.85314	12.757	11.3051	-1.29471	0.622148	No	0	ENSG00000077585	GPR137B	Intronic	12.1312	17.6614	14.8963	-1.45587	0.285128	No	0.553941	0.640414	0.597177	-1.15611	0.188605	No
chr1:236377547-236377692:AluJr	chr1	236377547	236377692	AluJr	+	SINE/Alu	AluJr	3.95199	9.99599	6.97399	-2.52936	0.0997058	No	0	ENSG00000077585	GPR137B	Intronic	6.64116	7.34036	6.99076	-1.10528	0.804926	No	0.544896	0.640414	0.592655	-1.1753	0.135017	No
chr1:236377720-236378394:L1ME4b	chr1	236377720	236378394	L1ME4b	+	LINE/L1	L1ME4b	26.3686	33.9076	30.1381	-1.28591	0.573781	No	0	ENSG00000077585	GPR137B	Intronic	66.8784	61.5693	64.2238	1.08623	0.783533	No	3.04319	0.951002	1.99709	3.19998	0.00980235	Yes
chr1:236378500-236378711:MIR	chr1	236378500	236378711	MIR	+	SINE/MIR	MIR	16.2842	15.9849	16.1345	1.01872	0.971978	No	0	ENSG00000077585	GPR137B	Intronic	38.8742	27.3571	33.1156	1.42099	0.396993	No	3.14725	1.1996	2.17343	2.62358	0.0450142	Yes
chr1:236420825-236421904:L1M3de	chr1	236420825	236421904	L1M3de	+	LINE/L1	L1M3de	1.02536	0.937715	0.981539	1.09347	0.880288	No	0	ENSG00000086619	ERO1LB	Intronic	4.20068	2.25344	3.22706	1.86412	0.162938	No	1.01893	1.25482	1.13687	-1.23151	0.655892	No
chr1:23645612-23646686:L2a	chr1	23645612	23646686	L2a	+	LINE/L2	L2a	6.18055	5.04076	5.61066	1.22611	0.812126	No	0	ENSG00000125944	HNRNPR	Intronic	0.536393	1.00683	0.771611	-1.87704	0.0204753	No	6.79068	96.3871	51.5889	-14.194	1.99084e-09	Yes
chr1:23646791-23647151:L2	chr1	23646791	23647151	L2	-	LINE/L2	L2	1.37328	2.29249	1.83289	-1.66935	0.501992	No	0	ENSG00000125944	HNRNPR	Intronic	3.54674	28.6329	16.0898	-8.07302	3.07075e-07	Yes	0.536704	0.640414	0.588559	-1.19324	0.102343	No
chr1:236895480-236895709:MLT1C2	chr1	236895480	236895709	MLT1C2	-	LTR/ERVL-MaLR	MLT1C2	2.87373	0.969373	1.92155	2.96453	0.118482	No	0	ENSG00000077522	ACTN2	Intronic	0.536393	0.640152	0.588272	-1.19344	0.0952777	No	3.94535	2.09079	3.01807	1.88701	0.184652	No
chr1:237269169-237269916:L2a	chr1	237269169	237269916	L2a	-	LINE/L2	L2a	0.951562	0.558678	0.75512	1.70324	0.169352	No	0	ENSG00000198626	RYR2	Intronic	0.544596	0.670026	0.607311	-1.23032	0.0952777	No	2.39902	1.03041	1.71472	2.32821	0.102343	No
chr1:237291772-237292396:L2	chr1	237291772	237292396	L2	-	LINE/L2	L2	1.17001	0.557264	0.863635	2.09955	0.0442482	Yes	0	ENSG00000198626	RYR2	Intronic	0.536393	0.640152	0.588272	-1.19344	0.0952777	No	1.87144	0.848822	1.36013	2.20475	0.102343	No
chr1:237320626-237321339:L1MA4	chr1	237320626	237321339	L1MA4	+	LINE/L1	L1MA4	1.52725	0.554269	1.04076	2.75543	0.011148	Yes	0	ENSG00000198626	RYR2	Intronic	5.73527	1.1501	3.44269	4.98676	0.00279296	Yes	0.635983	0.640414	0.638198	-1.00697	0.964892	No
chr1:237513935-237515297:L1MEg	chr1	237513935	237515297	L1MEg	+	LINE/L1	L1MEg	1.11726	0.546357	0.831808	2.04492	0.151406	No	0	ENSG00000198626	RYR2	Intronic	15.4874	1.809	8.64819	8.56127	0.000102821	Yes	0.544896	0.640414	0.592655	-1.1753	0.135017	No
chr1:239567317-239567618:AluY	chr1	239567317	239567618	AluY	+	SINE/Alu	AluY	0.993782	0.505934	0.749858	1.96425	0.0225773	No	0	ENSG00000133019	CHRM3	Intronic	2.4071	0.887	1.64705	2.71375	0.0173687	Yes	0.536704	0.640414	0.588559	-1.19324	0.102343	No
chr1:239847712-239847969:AluSz	chr1	239847712	239847969	AluSz	+	SINE/Alu	AluSz	0.888363	0.556839	0.722601	1.59537	0.159502	No	0	ENSG00000133019	CHRM3	Intronic	8.73915	0.930829	4.83499	9.38857	3.24119e-07	Yes	0.641285	0.665961	0.653623	-1.03848	0.820939	No
chr1:239878883-239879849:L2b	chr1	239878883	239879849	L2b	-	LINE/L2	L2b	1.62162	0.464882	1.04325	3.48824	0.000954125	Yes	0	ENSG00000133019	CHRM3	Intronic	0.536393	0.640152	0.588272	-1.19344	0.0952777	No	3.1177	0.781654	1.94968	3.98859	0.0011254	Yes
chr1:24023659-24023957:AluY	chr1	24023659	24023957	AluY	-	SINE/Alu	AluY	4.29494	15.1111	9.70302	-3.51835	0.00361998	Yes	745	ENSG00000142676	RPL11	afterGene	0.536393	0.640152	0.588272	-1.19344	0.0952777	No	3.03294	6.93459	4.98376	-2.28642	0.0362831	Yes
chr1:24024008-24024285:AluSg	chr1	24024008	24024285	AluSg	-	SINE/Alu	AluSg	7.47417	27.0074	17.2408	-3.61342	0.00500068	Yes	1094	ENSG00000142676	RPL11	afterGene	0.536393	0.659578	0.597985	-1.22965	0.0952777	No	4.35849	12.7886	8.57356	-2.93418	0.00446892	Yes
chr1:240350680-240350798:MIR3	chr1	240350680	240350798	MIR3	+	SINE/MIR	MIR3	0.855068	0.698872	0.77697	1.2235	0.698189	No	0	ENSG00000155816	FMN2	Intronic	4.10352	1.62353	2.86352	2.52752	0.0952777	No	0.544896	0.640414	0.592655	-1.1753	0.135017	No
chr1:240388588-240389946:L1M4b	chr1	240388588	240389946	L1M4b	+	LINE/L1	L1M4b	1.28268	0.57877	0.930725	2.21622	0.0260614	Yes	0	ENSG00000155816	FMN2	Intronic	2.12486	3.88085	3.00286	-1.82641	0.197677	No	0.583239	0.644141	0.61369	-1.10442	0.404259	No
chr1:240390155-240391321:L1M4b	chr1	240390155	240391321	L1M4b	+	LINE/L1	L1M4b	1.9089	0.578978	1.24394	3.29702	0.0100811	Yes	0	ENSG00000155816	FMN2	Intronic	7.31948	6.63311	6.97629	1.10348	0.82665	No	0.536704	0.688885	0.612794	-1.28355	0.102343	No
chr1:240391633-240391909:L1M4b	chr1	240391633	240391909	L1M4b	+	LINE/L1	L1M4b	0.903989	0.693255	0.798622	1.30398	0.600708	No	0	ENSG00000155816	FMN2	Intronic	3.65202	1.67869	2.66536	2.17552	0.0952777	No	0.536704	0.640414	0.588559	-1.19324	0.102343	No
chr1:24047102-24047441:L2b	chr1	24047102	24047441	L2b	-	LINE/L2	L2b	1.24489	0.529338	0.887114	2.35179	0.0267151	Yes	-22205	ENSG00000011007	TCEB3	Intergenic	0.659033	0.723743	0.691388	-1.09819	0.590484	No	4.34023	6.78092	5.56058	-1.56234	0.19811	No
chr1:240524700-240525411:L2	chr1	240524700	240525411	L2	-	LINE/L2	L2	4.85033	1.54396	3.19714	3.14149	0.0663997	No	0	ENSG00000155816	FMN2	Intronic	0.536393	0.688566	0.612479	-1.2837	0.0952777	No	2.06501	2.50155	2.28328	-1.2114	0.69152	No
chr1:24091333-24091688:MLT1A0	chr1	24091333	24091688	MLT1A0	+	LTR/ERVL-MaLR	MLT1A0	3.24721	1.28261	2.26491	2.53172	0.166321	No	2785	ENSG00000011007	TCEB3	afterGene	0.60393	0.713796	0.658863	-1.18192	0.284415	No	6.68268	11.618	9.15033	-1.73852	0.102343	No
chr1:240930886-240931257:MSTC	chr1	240930886	240931257	MSTC	-	LTR/ERVL-MaLR	MSTC	3.92317	8.10492	6.01404	-2.06591	0.245505	No	298	ENSG00000182901	RGS7	afterGene	12.3466	13.036	12.6913	-1.05584	0.877304	No	0.544896	0.68956	0.617228	-1.26549	0.102343	No
chr1:241022600-241023850:L1MC2	chr1	241022600	241023850	L1MC2	-	LINE/L1	L1MC2	1.36951	0.617678	0.993595	2.2172	0.093478	No	0	ENSG00000182901	RGS7	Intronic	7.59412	1.56597	4.58004	4.84948	0.00176002	Yes	0.614427	0.724387	0.669407	-1.17896	0.360598	No
chr1:241041196-241041421:L2a	chr1	241041196	241041421	L2a	+	LINE/L2	L2a	1.13802	0.582217	0.860119	1.95463	0.0972208	No	0	ENSG00000182901	RGS7	Intronic	0.536393	0.640152	0.588272	-1.19344	0.0952777	No	4.14615	1.5004	2.82328	2.76337	0.068533	No
chr1:241041468-241041726:L2a	chr1	241041468	241041726	L2a	+	LINE/L2	L2a	1.61161	0.744953	1.17828	2.16337	0.11323	No	0	ENSG00000182901	RGS7	Intronic	0.536393	0.640152	0.588272	-1.19344	0.0952777	No	4.44966	1.68497	3.06732	2.6408	0.0948903	No
chr1:241058208-241058549:MSTA	chr1	241058208	241058549	MSTA	+	LTR/ERVL-MaLR	MSTA	0.68448	0.660562	0.672521	1.03621	0.937857	No	0	ENSG00000182901	RGS7	Intronic	0.544596	0.640152	0.592374	-1.17546	0.127035	No	8.80953	1.77627	5.2929	4.95957	0.00148773	Yes
chr1:241058603-241064698:L1PA5	chr1	241058603	241064698	L1PA5	-	LINE/L1	L1PA5	3.70115	1.11104	2.4061	3.33125	0.0331145	Yes	0	ENSG00000182901	RGS7	Intronic	16.4839	5.81409	11.149	2.83517	0.0547369	No	0.643337	0.646791	0.645064	-1.00537	0.973605	No
chr1:241123183-241123472:AluSx	chr1	241123183	241123472	AluSx	+	SINE/Alu	AluSx	0.742738	0.464853	0.603795	1.59779	0.0699292	No	0	ENSG00000182901	RGS7	Intronic	0.536393	0.640152	0.588272	-1.19344	0.0952777	No	4.61679	1.09737	2.85708	4.20714	0.0109083	Yes
chr1:241123519-241123839:AluJb	chr1	241123519	241123839	AluJb	-	SINE/Alu	AluJb	0.570279	0.700696	0.635488	-1.22869	0.589177	No	0	ENSG00000182901	RGS7	Intronic	4.24167	1.72868	2.98517	2.4537	0.0952777	No	0.536704	0.670152	0.603428	-1.24864	0.102343	No
chr1:24117186-24117250:MIR3	chr1	24117186	24117250	MIR3	+	SINE/MIR	MIR3	3.00166	0.55824	1.77995	5.37701	0.000776222	Yes	-211	ENSG00000011009	LYPLA2	Intergenic	0.905661	0.737729	0.821695	1.22763	0.450703	No	10.3764	0.791666	5.58405	13.1071	3.50374e-08	Yes
chr1:241311341-241311650:AluSz	chr1	241311341	241311650	AluSz	-	SINE/Alu	AluSz	1.07217	0.668054	0.870113	1.60492	0.213852	No	0	ENSG00000182901	RGS7	Intronic	2.06573	1.00254	1.53414	2.0605	0.0952777	No	0.536704	0.679822	0.608263	-1.26666	0.102343	No
chr1:241369787-241370192:L2a	chr1	241369787	241370192	L2a	+	LINE/L2	L2a	0.892131	0.507951	0.700041	1.75633	0.0654762	No	0	ENSG00000182901	RGS7	Intronic	0.591056	0.640152	0.615604	-1.08306	0.510465	No	7.82558	1.81786	4.82172	4.30483	0.00660561	Yes
chr1:241397546-241398042:MLT1J	chr1	241397546	241398042	MLT1J	+	LTR/ERVL-MaLR	MLT1J	0.892678	0.464268	0.678473	1.92276	0.0144694	No	0	ENSG00000182901	RGS7	Intronic	0.536393	0.640152	0.588272	-1.19344	0.0952777	No	5.6724	1.89125	3.78183	2.99928	0.0286466	Yes
chr1:241478435-241478484:L2	chr1	241478435	241478484	L2	-	LINE/L2	L2	0.570929	0.508704	0.539816	1.12232	0.682534	No	0	ENSG00000182901	RGS7	Intronic	1.55878	0.728006	1.14339	2.14116	0.0736625	No	0.536704	0.640414	0.588559	-1.19324	0.102343	No
chr1:241478880-241479306:L1M3	chr1	241478880	241479306	L1M3	-	LINE/L1	L1M3	0.891926	0.640121	0.766024	1.39337	0.461373	No	0	ENSG00000182901	RGS7	Intronic	3.7936	1.75177	2.77268	2.16559	0.0952777	No	0.536704	0.640414	0.588559	-1.19324	0.102343	No
chr1:241527471-241527634:MIRb	chr1	241527471	241527634	MIRb	+	SINE/MIR	MIRb	4.92716	1.19151	3.05934	4.13521	0.0356774	Yes	-6942	ENSG00000182901	RGS7	Intergenic	14.532	1.87896	8.2055	7.73406	1.00957e-05	Yes	0.544896	0.640414	0.592655	-1.1753	0.135017	No
chr1:241587090-241587536:MER52D	chr1	241587090	241587536	MER52D	+	LTR/ERV1	MER52D	8.6251	6.05259	7.33884	1.42503	0.506829	No	-66561	ENSG00000182901	RGS7	Intergenic	7.33571	2.29984	4.81777	3.18966	0.0203555	Yes	0.726825	0.64212	0.684473	1.13191	0.43843	No
chr1:241587935-241588284:MER52D	chr1	241587935	241588284	MER52D	+	LTR/ERV1	MER52D	3.94918	2.03041	2.98979	1.94501	0.321247	No	-67406	ENSG00000182901	RGS7	Intergenic	5.93617	2.64537	4.29077	2.24399	0.0952777	No	0.536704	0.640414	0.588559	-1.19324	0.102343	No
chr1:241588286-241594694:L1PA7	chr1	241588286	241594694	L1PA7	-	LINE/L1	L1PA7	11.8191	3.55183	7.68545	3.3276	0.0949009	No	66210	ENSG00000091483	FH	Intergenic	0.598853	0.64194	0.620397	-1.07195	0.580249	No	30.1664	18.4456	24.306	1.63542	0.142171	No
chr1:242310319-242312966:L1ME1	chr1	242310319	242312966	L1ME1	-	LINE/L1	L1ME1	2.70135	0.803381	1.75237	3.36248	0.0541985	No	0	ENSG00000180287	PLD5	Intronic	1.4561	0.757093	1.10659	1.92327	0.11671	No	3.73976	1.28421	2.51199	2.91211	0.0639103	No
chr1:242313000-242315045:L1ME1	chr1	242313000	242315045	L1ME1	-	LINE/L1	L1ME1	0.898822	0.510089	0.704455	1.76209	0.0855489	No	0	ENSG00000180287	PLD5	Intronic	0.509033	0.683627	0.59633	-1.34299	0.151277	No	0.704333	0.738136	0.721234	-1.04799	0.82606	No
chr1:242315663-242322074:L1PA7	chr1	242315663	242322074	L1PA7	-	LINE/L1	L1PA7	2.819	0.883463	1.85123	3.19085	0.0493752	Yes	0	ENSG00000180287	PLD5	Intronic	1.05319	0.830952	0.942072	1.26745	0.567095	No	1.25585	1.08024	1.16805	1.16257	0.705771	No
chr1:242324416-242324727:THE1B	chr1	242324416	242324727	THE1B	-	LTR/ERVL-MaLR	THE1B	1.28183	0.556958	0.919394	2.30149	0.0138411	Yes	0	ENSG00000180287	PLD5	Intronic	2.33773	0.841054	1.58939	2.77952	0.0436605	Yes	0.989662	0.674879	0.832271	1.46643	0.102343	No
chr1:242328934-242329737:MER54B	chr1	242328934	242329737	MER54B	+	LTR/ERVL	MER54B	0.903165	0.508423	0.705794	1.7764	0.137109	No	0	ENSG00000180287	PLD5	Intronic	0.661104	0.829782	0.745443	-1.25515	0.339323	No	1.20601	0.845658	1.02584	1.42612	0.389332	No
chr1:242332443-242337612:L1PA7	chr1	242332443	242337612	L1PA7	+	LINE/L1	L1PA7	3.02137	0.72401	1.87269	4.1731	0.0141322	Yes	0	ENSG00000180287	PLD5	Intronic	1.62935	1.02458	1.32697	1.59026	0.296945	No	1.40444	0.90217	1.1533	1.55673	0.300234	No
chr1:242338353-242340872:L1PA7	chr1	242338353	242340872	L1PA7	+	LINE/L1	L1PA7	1.66938	0.875754	1.27257	1.90621	0.295677	No	0	ENSG00000180287	PLD5	Intronic	4.10166	2.03679	3.06922	2.01379	0.160218	No	0.827499	0.77855	0.803024	1.06287	0.872046	No
chr1:242350540-242350787:MLT1J	chr1	242350540	242350787	MLT1J	+	LTR/ERVL-MaLR	MLT1J	0.953236	0.657911	0.805573	1.44888	0.440945	No	0	ENSG00000180287	PLD5	Intronic	1.75442	1.12952	1.44197	1.55325	0.311479	No	0.562184	0.644419	0.603301	-1.14628	0.227924	No
chr1:24294901-24295085:MIR	chr1	24294901	24295085	MIR	+	SINE/MIR	MIR	8.71465	30.7602	19.7374	-3.52971	0.00162918	Yes	0	ENSG00000188529	SRSF10	Intronic	0.544596	0.643335	0.593965	-1.18131	0.121117	No	11.6964	57.8993	34.7979	-4.95017	2.9932e-08	Yes
chr1:243712750-243713026:AluJr	chr1	243712750	243713026	AluJr	-	SINE/Alu	AluJr	0.966525	1.24567	1.1061	-1.28882	0.701231	No	0	ENSG00000117020	AKT3	Intronic	1.18387	2.79852	1.99119	-2.36388	0.0952777	No	0.544896	0.640414	0.592655	-1.1753	0.135017	No
chr1:243713966-243714288:AluSc8	chr1	243713966	243714288	AluSc8	+	SINE/Alu	AluSc8	0.571692	1.33121	0.951452	-2.32855	0.13503	No	0	ENSG00000117020	AKT3	Intronic	0.536393	0.690817	0.613605	-1.28789	0.0952777	No	0.904356	1.37078	1.13757	-1.51575	0.354654	No
chr1:243730615-243730930:AluJb	chr1	243730615	243730930	AluJb	-	SINE/Alu	AluJb	0.892503	0.879881	0.886192	1.01435	0.977338	No	0	ENSG00000117020	AKT3	Intronic	2.3448	1.64923	1.99701	1.42176	0.430822	No	0.536704	0.640414	0.588559	-1.19324	0.102343	No
chr1:243743344-243746472:L1PA16	chr1	243743344	243746472	L1PA16	+	LINE/L1	L1PA16	1.05865	2.72113	1.88989	-2.57037	0.232956	No	0	ENSG00000117020	AKT3	Intronic	0.602322	0.667841	0.635082	-1.10878	0.456165	No	2.36563	4.34878	3.3572	-1.83832	0.200679	No
chr1:243746499-243750197:L1PA16	chr1	243746499	243750197	L1PA16	+	LINE/L1	L1PA16	2.52626	2.74266	2.63446	-1.08566	0.93537	No	0	ENSG00000117020	AKT3	Intronic	0.569962	0.737412	0.653687	-1.29379	0.127035	No	2.64681	3.04919	2.848	-1.15202	0.818737	No
chr1:243820684-243822060:L1MB1	chr1	243820684	243822060	L1MB1	+	LINE/L1	L1MB1	13.0076	9.83307	11.4203	1.32284	0.632136	No	0	ENSG00000117020	AKT3	Intronic	0.536393	0.640152	0.588272	-1.19344	0.0952777	No	20.9592	16.1565	18.5579	1.29726	0.527552	No
chr1:243958335-243958751:HAL1	chr1	243958335	243958751	HAL1	-	LINE/L1	HAL1	1.78061	0.679475	1.23004	2.62056	0.0402295	Yes	0	ENSG00000117020	AKT3	Intronic	9.74774	4.8475	7.29762	2.01088	0.0952777	No	0.544896	0.68956	0.617228	-1.26549	0.102343	No
chr1:243959073-243959453:HAL1	chr1	243959073	243959453	HAL1	-	LINE/L1	HAL1	1.52647	0.699793	1.11313	2.18131	0.0979039	No	0	ENSG00000117020	AKT3	Intronic	11.5726	7.57332	9.57296	1.52807	0.298078	No	0.536704	0.640414	0.588559	-1.19324	0.102343	No
chr1:243959700-243960052:L2b	chr1	243959700	243960052	L2b	+	LINE/L2	L2b	1.16667	0.657168	0.911921	1.77531	0.196078	No	0	ENSG00000117020	AKT3	Intronic	0.553583	0.747113	0.650348	-1.34959	0.0952777	No	6.21809	5.49427	5.85618	1.13174	0.789882	No
chr1:243961510-243961841:AluJr	chr1	243961510	243961841	AluJr	-	SINE/Alu	AluJr	0.978759	0.577042	0.777901	1.69617	0.159804	No	0	ENSG00000117020	AKT3	Intronic	5.7849	3.07853	4.43172	1.87911	0.1802	No	0.544896	0.670152	0.607524	-1.22987	0.102343	No
chr1:243983521-243988707:L1PA10	chr1	243983521	243988707	L1PA10	+	LINE/L1	L1PA10	3.14153	1.8655	2.50352	1.68402	0.509474	No	0	ENSG00000117020	AKT3	Intronic	0.544596	0.640152	0.592374	-1.17546	0.127035	No	5.1366	8.98812	7.06236	-1.74982	0.233902	No
chr1:244356124-244357935:L1ME3B	chr1	244356124	244357935	L1ME3B	-	LINE/L1	L1ME3B	0.571718	0.510192	0.540955	1.12059	0.66438	No	124914	ENSG00000268146	AL590483.1	Intergenic	0.571252	0.689748	0.6305	-1.20743	0.247406	No	0.992492	0.711606	0.852049	1.39472	0.429096	No
chr1:244860796-244862603:MER68-int	chr1	244860796	244862603	MER68-int	+	LTR/ERVL	MER68-int	1.07008	1.23668	1.15338	-1.15569	0.854819	No	0	ENSG00000121644	DESI2	Intronic	4.28104	6.24009	5.26057	-1.45761	0.371299	No	0.560789	0.659803	0.610296	-1.17656	0.177674	No
chr1:245001380-245002099:L2a	chr1	245001380	245002099	L2a	-	LINE/L2	L2a	5.78998	4.95109	5.37053	1.16944	0.84561	No	0	ENSG00000203667	COX20	Intronic	0.960967	2.29425	1.62761	-2.38744	0.076328	No	12.1815	45.0746	28.6281	-3.70026	0.000277565	Yes
chr1:245014281-245014410:FLAM_C	chr1	245014281	245014410	FLAM_C	-	SINE/Alu	FLAM_C	12.9664	25.1809	19.0736	-1.94201	0.064034	No	59	ENSG00000153187	HNRNPU	afterGene	9.81837	28.8117	19.3151	-2.93447	6.42857e-05	Yes	0.570493	0.956775	0.763634	-1.6771	0.0304457	No
chr1:245252014-245252250:L2c	chr1	245252014	245252250	L2c	-	LINE/L2	L2c	21.2523	19.2709	20.2616	1.10282	0.8322	No	0	ENSG00000203666	EFCAB2	Intronic	0.665729	0.751169	0.708449	-1.12834	0.543558	No	39.0475	27.259	33.1532	1.43246	0.176479	No
chr1:245252402-245252995:L2c	chr1	245252402	245252995	L2c	-	LINE/L2	L2c	47.1406	37.2534	42.197	1.26541	0.517865	No	0	ENSG00000203666	EFCAB2	Intronic	1.13232	0.894955	1.01364	1.26523	0.519738	No	96.3208	65.3652	80.843	1.47358	0.123563	No
chr1:246328326-246328651:L2b	chr1	246328326	246328651	L2b	-	LINE/L2	L2b	0.572507	0.50777	0.540139	1.12749	0.62049	No	0	ENSG00000185420	SMYD3	Intronic	0.779198	0.792073	0.785636	-1.01652	0.967023	No	0.536704	1.08853	0.812619	-2.02819	0.0304457	Yes
chr1:246330091-246330804:L1MB5	chr1	246330091	246330804	L1MB5	-	LINE/L1	L1MB5	0.68767	0.556136	0.621903	1.23651	0.481338	No	0	ENSG00000185420	SMYD3	Intronic	1.02322	1.00331	1.01326	1.01984	0.968402	No	0.536704	1.67141	1.10406	-3.11421	0.00316451	Yes
chr1:246433601-246436433:L1MB3	chr1	246433601	246436433	L1MB3	-	LINE/L1	L1MB3	4.42026	1.88607	3.15316	2.34364	0.158078	No	0	ENSG00000185420	SMYD3	Intronic	17.3836	14.3734	15.8785	1.20943	0.650532	No	0.536704	0.64212	0.589412	-1.19642	0.102343	No
chr1:246800455-246803401:HERVH48-int	chr1	246800455	246803401	HERVH48-int|MER48	-	LTR/ERV1	HERVH48-int	8.29003	1.9672	5.12862	4.21412	0.0329267	Yes	0	ENSG00000162852	CNST	Intronic	0.536393	0.64743	0.591911	-1.20701	0.0952777	No	5.67164	6.37636	6.024	-1.12425	0.818299	No
chr1:246933230-246933888:L1PA13	chr1	246933230	246933888	L1PA13	-	LINE/L1	L1PA13	6.59155	12.1342	9.36288	-1.84087	0.240304	No	1792	ENSG00000143653	SCCPDH	afterGene	0.536393	0.640152	0.588272	-1.19344	0.0952777	No	7.77914	7.06353	7.42134	1.10131	0.844637	No
chr1:247196922-247197370:MER70A	chr1	247196922	247197370	MER70A	-	LTR/ERVL	MER70A	19.4193	85.927	52.6731	-4.42483	9.2136e-06	Yes	0	ENSG00000135747	ZNF670	Intronic	29.3477	78.2607	53.8042	-2.66667	2.36654e-05	Yes	0.536704	0.6436	0.590152	-1.19917	0.102343	No
chr1:247197371-247197503:HERVL74-int	chr1	247197371	247197503	HERVL74-int	-	LTR/ERVL	HERVL74-int	3.67381	29.357	16.5154	-7.99091	3.8134e-05	Yes	0	ENSG00000135747	ZNF670	Intronic	7.16222	25.85	16.5061	-3.60922	2.5736e-06	Yes	0.536704	0.640414	0.588559	-1.19324	0.102343	No
chr1:247198372-247198497:HERVL74-int	chr1	247198372	247198497	HERVL74-int	-	LTR/ERVL	HERVL74-int	1.88103	25.7993	13.8402	-13.7155	1.53341e-06	Yes	0	ENSG00000135747	ZNF670	Intronic	7.87339	22.5846	15.229	-2.86847	0.000265165	Yes	0.536704	0.640414	0.588559	-1.19324	0.102343	No
chr1:247198498-247198800:LTR53	chr1	247198498	247198800	LTR53	-	LTR/ERVL	LTR53	5.34139	49.1121	27.2267	-9.19463	2.4501e-05	Yes	0	ENSG00000135747	ZNF670	Intronic	11.9098	35.108	23.5089	-2.94781	9.18393e-05	Yes	0.536704	0.640414	0.588559	-1.19324	0.102343	No
chr1:247199102-247199333:Tigger4a	chr1	247199102	247199333	Tigger4a	-	DNA/TcMar-Tigger	Tigger4a	3.13584	28.7368	15.9363	-9.16397	1.10487e-05	Yes	0	ENSG00000135747	ZNF670	Intronic	12.8602	41.3914	27.1258	-3.21857	9.27194e-06	Yes	0.536704	0.642736	0.58972	-1.19756	0.102343	No
chr1:247199334-247199624:L1M4	chr1	247199334	247199624	L1M4	+	LINE/L1	L1M4	5.27358	32.7875	19.0305	-6.21732	0.000211726	Yes	0	ENSG00000135747	ZNF670	Intronic	0.536393	0.64246	0.589426	-1.19774	0.0952777	No	4.8632	28.8785	16.8708	-5.93816	1.78229e-07	Yes
chr1:247199673-247199971:AluJr	chr1	247199673	247199971	AluJr	+	SINE/Alu	AluJr	8.58004	50.3055	29.4428	-5.86309	1.66888e-05	Yes	0	ENSG00000135747	ZNF670	Intronic	0.536393	0.640152	0.588272	-1.19344	0.0952777	No	3.29581	20.0884	11.6921	-6.09511	1.23822e-06	Yes
chr1:247261573-247261879:AluSx3	chr1	247261573	247261879	AluSx3	+	SINE/Alu	AluSx3	6.66952	36.1799	21.4247	-5.42466	5.8972e-05	Yes	1386	ENSG00000188295	ZNF669	afterGene	0.536393	0.689748	0.613071	-1.2859	0.0952777	No	5.28949	29.4594	17.3744	-5.56942	1.10877e-06	Yes
chr1:247262656-247262942:AluSc	chr1	247262656	247262942	AluSc	-	SINE/Alu	AluSc	3.69512	28.9723	16.3337	-7.84069	8.03424e-06	Yes	323	ENSG00000188295	ZNF669	afterGene	6.40422	40.4758	23.44	-6.32018	5.17017e-08	Yes	0.583239	0.64212	0.61268	-1.10096	0.420035	No
chr1:247262952-247263181:AluSc5	chr1	247262952	247263181	AluSc5	-	SINE/Alu	AluSc5	11.9337	73.543	42.7384	-6.16263	9.72861e-07	Yes	84	ENSG00000188295	ZNF669	afterGene	12.338	41.14	26.739	-3.33442	2.68446e-06	Yes	0.544896	0.640414	0.592655	-1.1753	0.135017	No
chr1:247294383-247295858:L1PA8A	chr1	247294383	247295858	L1PA8A	+	LINE/L1	L1PA8A	3.53865	5.55413	4.54639	-1.56956	0.576264	No	0	ENSG00000196418	ZNF124	Intronic	2.04699	16.9039	9.47543	-8.25792	2.42284e-07	Yes	3.2267	23.5758	13.4013	-7.30648	2.64587e-07	Yes
chr1:247297255-247299966:L1PA8A	chr1	247297255	247299966	L1PA8A	+	LINE/L1	L1PA8A	3.41944	5.34405	4.38175	-1.56284	0.614366	No	0	ENSG00000196418	ZNF124	Intronic	3.66367	25.8205	14.7421	-7.0477	3.60075e-06	Yes	2.63164	22.1725	12.4021	-8.42535	5.41806e-07	Yes
chr1:247300263-247300663:L1PA8A	chr1	247300263	247300663	L1PA8A	+	LINE/L1	L1PA8A	1.15249	1.6596	1.40605	-1.44	0.590846	No	0	ENSG00000196418	ZNF124	Intronic	2.11372	4.60882	3.36127	-2.18043	0.0910786	No	0.792708	1.78892	1.29081	-2.25672	0.0496708	Yes
chr1:247302560-247305014:L1PREC2	chr1	247302560	247305014	L1PREC2	-	LINE/L1	L1PREC2	3.39229	8.77594	6.08412	-2.58702	0.158984	No	0	ENSG00000196418	ZNF124	Intronic	4.91103	25.7338	15.3224	-5.24	2.53151e-07	Yes	1.8614	10.1023	5.98188	-5.42727	0.000247416	Yes
chr1:247318136-247318387:L1M4	chr1	247318136	247318387	L1M4	+	LINE/L1	L1M4	1.04628	13.6666	7.35641	-13.062	8.87614e-05	Yes	0	ENSG00000196418	ZNF124	Intronic	0.607411	2.58821	1.59781	-4.26105	0.000318723	Yes	1.67819	19.3142	10.4962	-11.509	1.29474e-10	Yes
chr1:247325924-247328270:L1PREC2	chr1	247325924	247328270	L1PREC2	+	LINE/L1	L1PREC2	3.79701	4.43757	4.11729	-1.1687	0.867015	No	0	ENSG00000196418	ZNF124	Intronic	3.10531	17.8484	10.4768	-5.74769	3.66012e-05	Yes	1.2407	17.2735	9.25708	-13.9224	2.60032e-08	Yes
chr1:247361693-247362009:THE1A	chr1	247361693	247362009	THE1A	+	LTR/ERVL-MaLR	THE1A	3.82132	1.39132	2.60632	2.74654	0.138729	No	-26376	ENSG00000196418	ZNF124	Intergenic	0.536393	0.679569	0.607981	-1.26692	0.0952777	No	7.28068	5.8779	6.57929	1.23865	0.59572	No
chr1:247449443-247454164:HERVH48-int	chr1	247449443	247454164	MER48|HERVH48-int|HERVH48-int|MER48	+	LTR/ERV1	HERVH48-int	30.9289	26.6645	28.7967	1.15993	0.804873	No	6551	ENSG00000162714	ZNF496	Intergenic	25.6578	0.729867	13.1938	35.1541	3.96935e-15	Yes	11.2645	36.9278	24.0962	-3.27824	4.69693e-05	Yes
chr1:247458631-247458990:MER74B	chr1	247458631	247458990	MER74B	+	LTR/ERVL	MER74B	3.25315	21.3466	12.2999	-6.56184	6.52139e-05	Yes	1725	ENSG00000162714	ZNF496	afterGene	0.596749	0.640152	0.61845	-1.07273	0.568165	No	10.079	34.7327	22.4058	-3.44606	2.63848e-06	Yes
chr1:247466312-247467672:MLT1B-int	chr1	247466312	247467672	MLT1B|MLT1B-int	+	LTR/ERVL-MaLR	MLT1B-int	10.6146	28.9691	19.7918	-2.72916	0.0982574	No	0	ENSG00000162714	ZNF496	Intronic	0.536393	0.640152	0.588272	-1.19344	0.0952777	No	15.3617	43.4399	29.4008	-2.82781	0.000562146	Yes
chr1:247497016-247497175:MIRb	chr1	247497016	247497175	MIRb	+	SINE/MIR	MIRb	11.9285	23.0256	17.477	-1.9303	0.0682585	No	-1869	ENSG00000162714	ZNF496	Intergenic	15.1057	50.3477	32.7267	-3.33303	3.71829e-06	Yes	0.536704	0.640414	0.588559	-1.19324	0.102343	No
chr1:247497177-247497449:L2a	chr1	247497177	247497449	L2a	-	LINE/L2	L2a	17.3023	38.9218	28.1121	-2.24952	0.00636052	Yes	-2030	ENSG00000162714	ZNF496	Intergenic	0.544596	0.64246	0.593528	-1.1797	0.123412	No	36.8176	102.261	69.5391	-2.77749	1.84174e-06	Yes
chr1:247520740-247523874:HERVP71A-int	chr1	247520740	247523874	HERVP71A-int|LTR71A	+	LTR/ERV1	HERVP71A-int	9.25452	2.7893	6.02191	3.31787	0.0630637	No	-25593	ENSG00000162714	ZNF496	Intergenic	27.0281	16.2439	21.636	1.66389	0.0952777	No	0.591463	0.667771	0.629617	-1.12901	0.340957	No
chr1:247529168-247530838:THE1A-int	chr1	247529168	247530838	THE1A-int|THE1A	+	LTR/ERVL-MaLR	THE1A-int	13.9876	1.57281	7.78022	8.89338	0.00108354	Yes	-34021	ENSG00000162714	ZNF496	Intergenic	43.2077	20.5338	31.8708	2.10422	0.0155345	Yes	0.557284	0.754731	0.656008	-1.3543	0.102343	No
chr1:247538153-247538842:LTR8	chr1	247538153	247538842	LTR8	+	LTR/ERV1	LTR8	39.079	3.26788	21.1734	11.9585	2.66539e-05	Yes	-40617	ENSG00000162711	NLRP3	Intergenic	47.7306	5.28664	26.5086	9.02853	8.5936e-08	Yes	0.536704	0.640414	0.588559	-1.19324	0.102343	No
chr1:247538843-247539439:LTR8A	chr1	247538843	247539439	LTR8A	+	LTR/ERV1	LTR8A	52.268	3.22205	27.745	16.222	6.84456e-07	Yes	-40020	ENSG00000162711	NLRP3	Intergenic	64.893	6.43176	35.6624	10.0895	3.33782e-10	Yes	0.59139	0.640414	0.615902	-1.0829	0.514803	No
chr1:247540027-247540816:MER21C	chr1	247540027	247540816	MER21C	+	LTR/ERVL	MER21C	33.5241	3.21745	18.3708	10.4195	7.10784e-06	Yes	-38643	ENSG00000162711	NLRP3	Intergenic	85.4826	8.56119	47.0219	9.98489	2.13491e-11	Yes	0.536704	0.640414	0.588559	-1.19324	0.102343	No
chr1:24799519-24799666:MER3	chr1	24799519	24799666	MER3	+	DNA/hAT-Charlie	MER3	24.0456	4.2879	14.1667	5.60777	0.000856195	Yes	54	ENSG00000001461	NIPAL3	afterGene	17.0797	4.30584	10.6928	3.96662	0.000627649	Yes	0.536704	0.640414	0.588559	-1.19324	0.102343	No
chr1:24799783-24800094:AluSp	chr1	24799783	24800094	AluSp	+	SINE/Alu	AluSp	24.4046	3.46632	13.9355	7.04051	0.00267828	Yes	318	ENSG00000001461	NIPAL3	afterGene	16.2663	3.95666	10.1115	4.11111	0.00062869	Yes	0.544896	0.670152	0.607524	-1.22987	0.102343	No
chr1:24800095-24800266:MIR	chr1	24800095	24800266	MIR	+	SINE/MIR	MIR	18.1055	2.90176	10.5037	6.2395	0.00137569	Yes	630	ENSG00000001461	NIPAL3	afterGene	23.4562	5.29503	14.3756	4.42985	0.000362442	Yes	0.536704	0.640414	0.588559	-1.19324	0.102343	No
chr1:24800492-24800621:MIRb	chr1	24800492	24800621	MIRb	-	SINE/MIR	MIRb	7.68352	1.4923	4.58791	5.14879	0.0110226	Yes	1027	ENSG00000001461	NIPAL3	afterGene	0.536393	0.689199	0.612796	-1.28488	0.0952777	No	19.5992	3.63013	11.6146	5.39903	5.54938e-05	Yes
chr1:24800622-24800932:AluJr	chr1	24800622	24800932	AluJr	+	SINE/Alu	AluJr	17.5909	2.56558	10.0782	6.85651	0.000782453	Yes	1157	ENSG00000001461	NIPAL3	afterGene	35.5748	7.88425	21.7295	4.51213	6.94074e-06	Yes	0.583146	0.640414	0.61178	-1.0982	0.433051	No
chr1:24800933-24801034:MIRb	chr1	24800933	24801034	MIRb	-	SINE/MIR	MIRb	22.6696	3.65614	13.1629	6.20042	0.000471187	Yes	1468	ENSG00000001461	NIPAL3	afterGene	0.536393	0.644352	0.590372	-1.20127	0.0952777	No	35.407	6.00147	20.7042	5.89972	6.83868e-07	Yes
chr1:24801219-24801522:AluSc	chr1	24801219	24801522	AluSc	+	SINE/Alu	AluSc	26.4744	4.20012	15.3373	6.30326	0.000512568	Yes	1754	ENSG00000001461	NIPAL3	afterGene	30.733	7.41457	19.0738	4.14495	2.04921e-05	Yes	0.599167	0.640414	0.619791	-1.06884	0.593835	No
chr1:24802549-24802851:AluSp	chr1	24802549	24802851	AluSp	-	SINE/Alu	AluSp	9.04197	3.23803	6.14	2.79243	0.0745908	No	3084	ENSG00000001461	NIPAL3	afterGene	0.544596	0.640152	0.592374	-1.17546	0.127035	No	11.8435	2.35178	7.09762	5.03596	0.000800494	Yes
chr1:24802852-24802946:L1ME4b	chr1	24802852	24802946	L1ME4b	-	LINE/L1	L1ME4b	11.2352	1.25555	6.24537	8.9484	0.000831753	Yes	3387	ENSG00000001461	NIPAL3	afterGene	0.544596	0.640152	0.592374	-1.17546	0.127035	No	26.1374	5.24568	15.6915	4.98265	0.000170063	Yes
chr1:248042336-248043417:L2a	chr1	248042336	248043417	L2a	+	LINE/L2	L2a	19.2293	68.0875	43.6584	-3.54082	0.000335808	Yes	0	ENSG00000238243	OR2W3	Intronic	24.4043	84.8991	54.6517	-3.47886	2.65592e-07	Yes	0.641285	0.640414	0.640849	1.00136	0.993293	No
chr1:248085585-248086323:L1ME2z	chr1	248085585	248086323	L1ME2z	-	LINE/L1	L1ME2z	7.68379	1.66649	4.67514	4.61077	0.015077	Yes	328	ENSG00000177462	OR2T8	afterGene	0.536393	0.640152	0.588272	-1.19344	0.0952777	No	10.5049	2.50395	6.50444	4.19535	0.00207396	Yes
chr1:248842064-248842446:HAL1	chr1	248842064	248842446	HAL1	+	LINE/L1	HAL1	10.3907	0.462351	5.42652	22.4736	5.10382e-08	Yes	2183	ENSG00000189181	OR14I1	afterGene	0.536393	0.640152	0.588272	-1.19344	0.0952777	No	29.6933	0.640414	15.1669	46.3658	2.63926e-17	Yes
chr1:248865741-248866133:L2	chr1	248865741	248866133	L2	+	LINE/L2	L2	6.70793	0.464793	3.58636	14.4321	8.17121e-08	Yes	-20113	ENSG00000189181	OR14I1	Intergenic	1.60098	0.640152	1.12056	2.50093	0.000269326	Yes	30.3174	0.640414	15.4789	47.3403	1.11313e-16	Yes
chr1:248866515-248867058:L2a	chr1	248866515	248867058	L2a	+	LINE/L2	L2a	5.73343	0.464291	3.09886	12.3488	4.58256e-07	Yes	-20887	ENSG00000189181	OR14I1	Intergenic	1.69451	0.667769	1.18114	2.53757	0.000915378	Yes	24.6751	0.640414	12.6578	38.5299	6.62961e-16	Yes
chr1:248876941-248881304:MER4-int	chr1	248876941	248881304	MER4-int|MER4-int|MER4-int|MER4-int|MER4-int|MER4A1	+	LTR/ERV1	MER4-int	14.3765	0.574694	7.47561	25.016	3.183e-06	Yes	21413	ENSG00000266949	LYPD8	Intergenic	0.6813	0.644352	0.662826	1.05734	0.728996	No	32.727	0.664477	16.6958	49.2523	7.79947e-17	Yes
chr1:248882479-248883045:L1M2b	chr1	248882479	248883045	L1M2b	+	LINE/L1	L1M2b	5.53802	0.465105	3.00156	11.907	8.11036e-06	Yes	19672	ENSG00000266949	LYPD8	Intergenic	0.536393	0.640152	0.588272	-1.19344	0.0952777	No	17.4057	0.640414	9.02306	27.1788	3.21257e-14	Yes
chr1:248883347-248884525:L1M2b	chr1	248883347	248884525	L1M2b	+	LINE/L1	L1M2b	15.2966	0.46202	7.87932	33.1081	2.06671e-08	Yes	18192	ENSG00000266949	LYPD8	Intergenic	0.536393	0.640152	0.588272	-1.19344	0.0952777	No	17.2722	0.646791	8.95949	26.7044	5.31685e-14	Yes
chr1:249145463-249147728:L2a	chr1	249145463	249147728	L2a	+	LINE/L2	L2a	19.7208	5.96246	12.8416	3.30749	0.106361	No	0	ENSG00000171163	ZNF692	Intronic	4.50732	2.74784	3.62758	1.64031	0.217748	No	40.2871	104.164	72.2256	-2.58554	0.000148636	Yes
chr1:25560082-25560214:FLAM_C	chr1	25560082	25560214	FLAM_C	+	SINE/Alu	FLAM_C	0.571562	0.749783	0.660673	-1.31181	0.506194	No	-1090	ENSG00000117614	SYF2	Intergenic	2.50768	2.15824	2.33296	1.16191	0.736607	No	0.566928	0.672097	0.619512	-1.18551	0.232371	No
chr1:25576424-25576939:LTR6A	chr1	25576424	25576939	LTR6A	-	LTR/ERV1	LTR6A	10.1736	0.90913	5.54135	11.1905	0.000329268	Yes	0	ENSG00000117616	C1orf63	Intronic	32.6471	10.8323	21.7397	3.01386	0.000398201	Yes	0.684302	0.640414	0.662358	1.06853	0.660563	No
chr1:25588995-25589410:Ricksha	chr1	25588995	25589410	Ricksha	-	DNA/MULE-MuDR	Ricksha	5.33167	14.1346	9.73312	-2.65106	0.0751375	No	0	ENSG00000117616	C1orf63	Intronic	20.4394	36.4444	28.4419	-1.78304	0.0339953	No	0.536704	0.640414	0.588559	-1.19324	0.102343	No
chr1:25589806-25591716:THE1B-int	chr1	25589806	25591716	THE1B|THE1B-int	-	LTR/ERVL-MaLR	THE1B-int	15.022	43.2916	29.1568	-2.88187	0.0114551	Yes	0	ENSG00000117616	C1orf63	Intronic	59.7799	127.695	93.7376	-2.13609	0.000139004	Yes	0.658839	0.647624	0.653231	1.01732	0.911176	No
chr1:25659278-25659811:MLT2B3	chr1	25659278	25659811	MLT2B3	-	LTR/ERVL	MLT2B3	6.7071	8.23356	7.47033	-1.22759	0.763325	No	0	ENSG00000117616	C1orf63	Intronic	24.9578	27.2001	26.0789	-1.08984	0.828886	No	0.544896	0.640414	0.592655	-1.1753	0.135017	No
chr1:25818232-25818685:L2c	chr1	25818232	25818685	L2c	-	LINE/L2	L2c	1.65637	2.34067	1.99852	-1.41313	0.632805	No	0	ENSG00000204178	TMEM57	Intronic	0.723334	0.736604	0.729969	-1.01835	0.937333	No	4.81487	14.0545	9.43468	-2.91898	0.00741214	Yes
chr1:25818789-25819204:L2a	chr1	25818789	25819204	L2a	-	LINE/L2	L2a	1.23355	1.93601	1.58478	-1.56947	0.527516	No	0	ENSG00000204178	TMEM57	Intronic	0.563151	0.640152	0.601652	-1.13673	0.24806	No	4.04061	17.0629	10.5518	-4.22286	0.000118177	Yes
chr1:25819385-25819522:FLAM_C	chr1	25819385	25819522	FLAM_C	+	SINE/Alu	FLAM_C	1.12853	1.04743	1.08798	1.07743	0.906973	No	0	ENSG00000204178	TMEM57	Intronic	2.33094	11.3856	6.85827	-4.88457	3.90884e-05	Yes	0.583239	0.640414	0.611826	-1.09803	0.433051	No
chr1:25820522-25820679:Charlie1b	chr1	25820522	25820679	Charlie1b	-	DNA/hAT-Charlie	Charlie1b	1.41899	1.06844	1.24372	1.3281	0.67335	No	0	ENSG00000204178	TMEM57	Intronic	0.544596	0.667769	0.606183	-1.22617	0.0985597	No	2.2043	7.46897	4.83663	-3.38836	0.0110529	Yes
chr1:25821215-25821358:L2a	chr1	25821215	25821358	L2a	-	LINE/L2	L2a	1.39371	1.44011	1.41691	-1.03329	0.964444	No	0	ENSG00000204178	TMEM57	Intronic	0.558915	0.881516	0.720215	-1.57719	0.0547285	No	3.12983	15.8483	9.48904	-5.06361	2.0377e-05	Yes
chr1:25822633-25822938:AluJb	chr1	25822633	25822938	AluJb	-	SINE/Alu	AluJb	0.819411	1.91203	1.36572	-2.33342	0.168785	No	0	ENSG00000204178	TMEM57	Intronic	0.536393	0.640152	0.588272	-1.19344	0.0952777	No	2.71117	21.7295	12.2204	-8.01483	4.83836e-07	Yes
chr1:25823306-25823536:MIR	chr1	25823306	25823536	MIR	+	SINE/MIR	MIR	1.23078	1.51628	1.37353	-1.23197	0.778854	No	0	ENSG00000204178	TMEM57	Intronic	5.45707	31.9788	18.7179	-5.86006	5.53593e-08	Yes	0.536704	0.707879	0.622291	-1.31894	0.0881637	No
chr1:25823590-25823889:AluSp	chr1	25823590	25823889	AluSp	+	SINE/Alu	AluSp	1.85923	1.40001	1.62962	1.32802	0.676733	No	0	ENSG00000204178	TMEM57	Intronic	1.87635	14.1703	8.02334	-7.55208	2.85437e-08	Yes	0.536704	0.725482	0.631093	-1.35174	0.0846921	No
chr1:25824437-25824627:MER58C	chr1	25824437	25824627	MER58C	+	DNA/hAT-Charlie	MER58C	1.84022	1.97701	1.90861	-1.07433	0.934233	No	0	ENSG00000204178	TMEM57	Intronic	11.8555	48.8757	30.3656	-4.12262	3.36441e-06	Yes	0.544896	0.644613	0.594754	-1.183	0.127974	No
chr1:25876661-25876881:MIR	chr1	25876661	25876881	MIR	-	SINE/MIR	MIR	1.17578	0.464614	0.820197	2.53066	0.00368541	Yes	0	ENSG00000157978	LDLRAP1	Intronic	0.544596	0.640152	0.592374	-1.17546	0.127035	No	0.710003	0.687656	0.69883	1.0325	0.920294	No
chr1:25877157-25877237:MIR3	chr1	25877157	25877237	MIR3	+	SINE/MIR	MIR3	0.823013	0.507706	0.66536	1.62104	0.0705415	No	0	ENSG00000157978	LDLRAP1	Intronic	0.88159	0.753622	0.817606	1.1698	0.654307	No	0.536704	0.640414	0.588559	-1.19324	0.102343	No
chr1:25884260-25884372:MIR	chr1	25884260	25884372	MIR	-	SINE/MIR	MIR	0.87989	0.55697	0.71843	1.57978	0.249793	No	0	ENSG00000157978	LDLRAP1	Intronic	0.536393	0.640152	0.588272	-1.19344	0.0952777	No	1.10991	0.772833	0.941371	1.43615	0.359039	No
chr1:25884891-25885366:MLT1D	chr1	25884891	25885366	MLT1D	-	LTR/ERVL-MaLR	MLT1D	3.59304	0.463716	2.02838	7.74837	0.00023961	Yes	0	ENSG00000157978	LDLRAP1	Intronic	0.556911	0.641892	0.599401	-1.15259	0.191578	No	2.49317	1.07956	1.78636	2.30943	0.102343	No
chr1:25885367-25885519:MIR3	chr1	25885367	25885519	MIR3	+	SINE/MIR	MIR3	1.78189	0.528953	1.15542	3.3687	0.00478131	Yes	0	ENSG00000157978	LDLRAP1	Intronic	1.56953	0.882289	1.22591	1.77893	0.179562	No	0.59837	0.640414	0.619392	-1.07026	0.58833	No
chr1:25891832-25891941:L3	chr1	25891832	25891941	L3	-	LINE/CR1	L3	5.42392	0.464832	2.94438	11.6686	1.53057e-06	Yes	0	ENSG00000157978	LDLRAP1	Intronic	0.702434	0.640152	0.671293	1.09729	0.569822	No	2.82142	1.19628	2.00885	2.3585	0.102343	No
chr1:25892605-25892932:L1ME4a	chr1	25892605	25892932	L1ME4a	-	LINE/L1	L1ME4a	7.75915	0.633947	4.19655	12.2394	0.00017771	Yes	0	ENSG00000157978	LDLRAP1	Intronic	1.08316	0.696764	0.889961	1.55455	0.0952777	No	8.4316	2.65571	5.54366	3.17489	0.0524394	No
chr1:25920195-25920589:MER47B	chr1	25920195	25920589	MER47B	-	DNA/TcMar-Tigger	MER47B	0.965276	0.465209	0.715242	2.07493	0.0128383	Yes	-23371	ENSG00000117643	MAN1C1	Intergenic	0.571186	0.641892	0.606539	-1.12379	0.331175	No	1.10458	0.860394	0.982485	1.2838	0.550419	No
chr1:25924702-25925242:LTR67B	chr1	25924702	25925242	LTR67B	+	LTR/ERVL	LTR67B	1.32524	0.554193	0.939714	2.39129	0.0452667	Yes	-18718	ENSG00000117643	MAN1C1	Intergenic	1.77183	1.30878	1.5403	1.3538	0.543615	No	0.776519	0.646807	0.711663	1.20054	0.284117	No
chr1:25925268-25925708:MLT1G3	chr1	25925268	25925708	MLT1G3	+	LTR/ERVL-MaLR	MLT1G3	1.51466	0.531797	1.02323	2.84819	0.0168474	Yes	-18252	ENSG00000117643	MAN1C1	Intergenic	2.02177	1.41695	1.71936	1.42685	0.492928	No	0.742613	0.642994	0.692803	1.15493	0.407952	No
chr1:25926259-25926448:L2b	chr1	25926259	25926448	L2b	-	LINE/L2	L2b	1.07125	0.464724	0.767985	2.30512	0.00377363	Yes	-17512	ENSG00000117643	MAN1C1	Intergenic	0.673343	0.6851	0.679221	-1.01746	0.939293	No	1.49557	0.75171	1.12364	1.98955	0.102343	No
chr1:25926538-25926764:MIR	chr1	25926538	25926764	MIR	+	SINE/MIR	MIR	0.57149	0.46544	0.518465	1.22785	0.288057	No	-17196	ENSG00000117643	MAN1C1	Intergenic	1.37569	0.978628	1.17716	1.40573	0.467793	No	0.566226	0.640414	0.60332	-1.13102	0.279313	No
chr1:25929721-25931423:SVA_F	chr1	25929721	25931423	SVA_F	+	Retroposon/SVA	SVA_F	1.07608	0.838205	0.957145	1.2838	0.609924	No	-12537	ENSG00000117643	MAN1C1	Intergenic	6.10701	2.33539	4.2212	2.61499	0.0952777	No	0.571031	0.72948	0.650255	-1.27748	0.166571	No
chr1:25931589-25932266:L1MA8	chr1	25931589	25932266	L1MA8	+	LINE/L1	L1MA8	0.777816	0.508765	0.643291	1.52883	0.158102	No	-11694	ENSG00000117643	MAN1C1	Intergenic	5.13461	1.37039	3.2525	3.74682	0.0214074	Yes	0.677767	0.644318	0.661043	1.05191	0.796211	No
chr1:25932489-25933128:L1MA8	chr1	25932489	25933128	L1MA8	+	LINE/L1	L1MA8	1.15952	0.464649	0.812086	2.49548	0.00273892	Yes	-10832	ENSG00000117643	MAN1C1	Intergenic	5.12549	2.32877	3.72713	2.20094	0.0985707	No	0.558341	0.707092	0.632717	-1.26642	0.172437	No
chr1:26101951-26102256:L2b	chr1	26101951	26102256	L2b	-	LINE/L2	L2b	1.56547	0.858288	1.21188	1.82395	0.295948	No	0	ENSG00000117643	MAN1C1	Intronic	0.544596	0.640152	0.592374	-1.17546	0.127035	No	6.51086	2.38083	4.44585	2.7347	0.0801904	No
chr1:26105016-26105130:MIRc	chr1	26105016	26105130	MIRc	-	SINE/MIR	MIRc	1.67051	0.641242	1.15587	2.60511	0.0642897	No	0	ENSG00000117643	MAN1C1	Intronic	0.553583	0.640152	0.596867	-1.15638	0.179605	No	6.47748	2.47763	4.47756	2.61438	0.0637614	No
chr1:26105356-26105553:MIR3	chr1	26105356	26105553	MIR3	-	SINE/MIR	MIR3	1.97658	0.904763	1.44067	2.18464	0.19868	No	0	ENSG00000117643	MAN1C1	Intronic	0.544596	0.640152	0.592374	-1.17546	0.127035	No	8.39631	3.5677	5.98201	2.35342	0.0961484	No
chr1:26105752-26105830:MIRb	chr1	26105752	26105830	MIRb	+	SINE/MIR	MIRb	1.83808	0.661074	1.24958	2.78045	0.0265704	Yes	0	ENSG00000117643	MAN1C1	Intronic	3.62473	1.55237	2.58855	2.33497	0.0952777	No	0.536704	0.688885	0.612794	-1.28355	0.102343	No
chr1:26106500-26106746:MIRb	chr1	26106500	26106746	MIRb	+	SINE/MIR	MIRb	4.81123	0.595353	2.70329	8.0813	5.5417e-05	Yes	0	ENSG00000117643	MAN1C1	Intronic	13.1859	5.08836	9.13712	2.59138	0.039622	Yes	0.544896	0.6436	0.594248	-1.18114	0.128511	No
chr1:26106977-26107133:MER103C	chr1	26106977	26107133	MER103C	-	DNA/hAT-Charlie	MER103C	1.62685	0.835593	1.23122	1.94694	0.261646	No	0	ENSG00000117643	MAN1C1	Intronic	0.536393	0.656906	0.59665	-1.22467	0.0952777	No	9.79131	5.59002	7.69067	1.75157	0.136079	No
chr1:26147634-26147743:L2c	chr1	26147634	26147743	L2c	-	LINE/L2	L2c	7.28375	2.92551	5.10463	2.48974	0.185101	No	0	ENSG00000255054	RP1-317E23.6	Intronic	0.602322	0.712699	0.657511	-1.18325	0.311383	No	24.1169	9.8715	16.9942	2.44308	0.0626421	No
chr1:26215915-26216628:L2a	chr1	26215915	26216628	L2a	+	LINE/L2	L2a	2.62872	9.03155	5.83014	-3.43571	0.0360672	Yes	0	ENSG00000117632	STMN1	Intronic	0.544596	0.689118	0.616857	-1.26538	0.0952777	No	5.25161	21.7924	13.522	-4.14966	1.50891e-05	Yes
chr1:26512403-26512732:L2c	chr1	26512403	26512732	L2c	-	LINE/L2	L2c	3.80327	1.19705	2.50016	3.17721	0.0871139	No	0	ENSG00000142675	CNKSR1	Intronic	0.596811	0.691961	0.644386	-1.15943	0.32355	No	8.97351	17.6571	13.3153	-1.96769	0.0353413	No
chr1:26766824-26767067:MIR	chr1	26766824	26767067	MIR	+	SINE/MIR	MIR	1.62619	1.04955	1.33787	1.54942	0.529866	No	0	ENSG00000117682	DHDDS	Intronic	6.03211	3.55374	4.79292	1.6974	0.161046	No	0.553941	1.05882	0.806379	-1.91143	0.0069415	No
chr1:26768792-26768993:MIRc	chr1	26768792	26768993	MIRc	-	SINE/MIR	MIRc	2.0975	0.928701	1.5131	2.25853	0.194283	No	0	ENSG00000117682	DHDDS	Intronic	0.565494	0.725083	0.645289	-1.28221	0.11734	No	11.8202	5.27619	8.54818	2.24029	0.0941982	No
chr1:27268504-27268799:AluSg7	chr1	27268504	27268799	AluSg7	+	SINE/Alu	AluSg7	1.41795	1.21135	1.31465	1.17056	0.830183	No	0	ENSG00000090273	NUDC	Intronic	5.17353	14.4276	9.80055	-2.78873	0.00175055	Yes	0.59837	0.691717	0.645044	-1.156	0.344541	No
chr1:27327516-27327583:LTR33	chr1	27327516	27327583	LTR33	-	LTR/ERVL	LTR33	8.04924	1.75646	4.90285	4.58265	0.0110823	Yes	128	ENSG00000253368	TRNP1	afterGene	0.592002	0.640152	0.616077	-1.08133	0.519903	No	22.757	4.1553	13.4562	5.47662	6.69537e-05	Yes
chr1:27327584-27327867:AluJr	chr1	27327584	27327867	AluJr	+	SINE/Alu	AluJr	13.8109	4.32716	9.06903	3.19168	0.0353322	Yes	196	ENSG00000253368	TRNP1	afterGene	36.6873	6.78502	21.7362	5.4071	4.05823e-05	Yes	0.638901	0.691717	0.665309	-1.08267	0.628241	No
chr1:27389965-27392050:SVA_E	chr1	27389965	27392050	SVA_E	+	Retroposon/SVA	SVA_E	12.241	1.33955	6.79028	9.13813	0.000634757	Yes	33257	ENSG00000090020	SLC9A1	Intergenic	21.4627	6.6303	14.0465	3.23706	0.00479078	Yes	0.591463	0.760176	0.67582	-1.28525	0.138628	No
chr1:27861670-27861928:MIR	chr1	27861670	27861928	MIR	+	SINE/MIR	MIR	3.40986	0.826297	2.11808	4.12667	0.0155136	Yes	0	ENSG00000126705	AHDC1	Intronic	0.544596	0.640152	0.592374	-1.17546	0.127035	No	2.32111	6.62141	4.47126	-2.85268	0.0181009	Yes
chr1:27993367-27993606:LTR103_Mam	chr1	27993367	27993606	LTR103_Mam	+	LTR/ERV1?	LTR103_Mam	1.93859	0.76119	1.34989	2.54679	0.0630743	No	0	ENSG00000126709	IFI6	Intronic	0.536393	0.640152	0.588272	-1.19344	0.0952777	No	3.119	0.996411	2.0577	3.13023	0.0389196	Yes
chr1:27993639-27993920:AluJo	chr1	27993639	27993920	AluJo	+	SINE/Alu	AluJo	0.885239	0.463828	0.674534	1.90855	0.0133359	No	0	ENSG00000126709	IFI6	Intronic	0.536393	0.640152	0.588272	-1.19344	0.0952777	No	2.58396	1.10164	1.8428	2.34556	0.102343	No
chr1:28283132-28284237:L2a	chr1	28283132	28284237	L2a	-	LINE/L2	L2a	1.27435	0.554579	0.914463	2.29787	0.0209844	Yes	0	ENSG00000130768	SMPDL3B	Intronic	0.621672	0.659805	0.640739	-1.06134	0.687115	No	1.52106	1.1463	1.33368	1.32693	0.560502	No
chr1:28526875-28526981:MIRb	chr1	28526875	28526981	MIRb	-	SINE/MIR	MIRb	8.45375	7.1636	7.80868	1.1801	0.733426	No	0	ENSG00000126698	DNAJC8	Intronic	6.52605	3.35335	4.9397	1.94613	0.0952777	No	0.544896	0.640414	0.592655	-1.1753	0.135017	No
chr1:28738184-28738321:L1PB1	chr1	28738184	28738321	L1PB1	+	LINE/L1	L1PB1	0.683318	0.74758	0.715449	-1.09404	0.850764	No	0	ENSG00000204138	PHACTR4	Intronic	2.43568	1.28971	1.8627	1.88854	0.162708	No	0.544896	0.690137	0.617516	-1.26655	0.102343	No
chr1:28903433-28903581:FRAM	chr1	28903433	28903581	FRAM	+	SINE/Alu	FRAM	2.47285	1.2395	1.85617	1.99503	0.344364	No	0	ENSG00000180098	TRNAU1AP	Intronic	7.85429	23.4492	15.6517	-2.98552	0.000589456	Yes	0.629296	0.75314	0.691218	-1.1968	0.374974	No
chr1:29190499-29190780:AluJo	chr1	29190499	29190780	AluJo	+	SINE/Alu	AluJo	20.9374	0.66649	10.8019	31.4144	1.55901e-07	Yes	292	ENSG00000116329	OPRD1	afterGene	10.9208	0.81852	5.86966	13.3421	1.12646e-09	Yes	0.536704	0.640414	0.588559	-1.19324	0.102343	No
chr1:29192572-29192942:L2c	chr1	29192572	29192942	L2c	-	LINE/L2	L2c	32.8649	0.75092	16.8079	43.7661	9.07739e-08	Yes	2365	ENSG00000116329	OPRD1	afterGene	0.536393	0.640152	0.588272	-1.19344	0.0952777	No	27.8385	0.951723	14.3951	29.2506	9.96362e-13	Yes
chr1:29193328-29193501:hAT-1_Mam	chr1	29193328	29193501	hAT-1_Mam	+	DNA/hAT-Tag1	hAT-1_Mam	11.2115	0.503777	5.85764	22.2549	4.62679e-06	Yes	3121	ENSG00000116329	OPRD1	afterGene	17.0907	0.977325	9.03399	17.4872	5.71534e-10	Yes	0.536704	0.640414	0.588559	-1.19324	0.102343	No
chr1:29195969-29196223:MIRc	chr1	29195969	29196223	MIRc	-	SINE/MIR	MIRc	60.019	1.08627	30.5527	55.2522	1.37685e-08	Yes	5762	ENSG00000116329	OPRD1	Intergenic	1.81579	0.75283	1.28431	2.41196	0.02722	Yes	50.9637	1.43518	26.1994	35.5103	1.97347e-13	Yes
chr1:29242867-29243153:AluSz	chr1	29242867	29243153	AluSz	+	SINE/Alu	AluSz	0.82504	0.841115	0.833078	-1.01948	0.969701	No	0	ENSG00000159023	EPB41	Intronic	0.511986	1.4942	1.00309	-2.91843	0.0131926	Yes	0.536704	0.640414	0.588559	-1.19324	0.102343	No
chr1:29396189-29396483:AluSg	chr1	29396189	29396483	AluSg	-	SINE/Alu	AluSg	2.88937	1.60354	2.24646	1.80187	0.366326	No	0	ENSG00000159023	EPB41	Intronic	0.536393	0.640152	0.588272	-1.19344	0.0952777	No	3.88806	1.35953	2.6238	2.85985	0.0570892	No
chr1:29396662-29396721:L2a	chr1	29396662	29396721	L2a	-	LINE/L2	L2a	3.56066	0.949989	2.25532	3.7481	0.0240728	Yes	0	ENSG00000159023	EPB41	Intronic	0.553583	0.640152	0.596867	-1.15638	0.179605	No	6.27205	0.907886	3.58997	6.90842	0.000138214	Yes
chr1:29399341-29399644:AluSx	chr1	29399341	29399644	AluSx	+	SINE/Alu	AluSx	3.43946	0.758868	2.09916	4.53236	0.00626228	Yes	0	ENSG00000159023	EPB41	Intronic	2.74758	0.971258	1.85942	2.82888	0.0578465	No	0.560789	0.670152	0.61547	-1.19502	0.155968	No
chr1:29401709-29402004:AluSx1	chr1	29401709	29402004	AluSx1	+	SINE/Alu	AluSx1	1.56634	0.693913	1.13013	2.25726	0.0578737	No	0	ENSG00000159023	EPB41	Intronic	2.63859	1.08314	1.86087	2.43605	0.0952777	No	0.544896	0.640414	0.592655	-1.1753	0.135017	No
chr1:29402350-29402649:L3	chr1	29402350	29402649	L3	-	LINE/CR1	L3	2.54957	0.831335	1.69045	3.06683	0.0374748	Yes	0	ENSG00000159023	EPB41	Intronic	0.548921	0.640152	0.594536	-1.1662	0.151277	No	9.50366	1.70233	5.60299	5.58274	0.000406812	Yes
chr1:29404990-29405278:AluJr	chr1	29404990	29405278	AluJr	+	SINE/Alu	AluJr	1.56703	0.678739	1.12289	2.30874	0.0607808	No	0	ENSG00000159023	EPB41	Intronic	2.64023	1.07867	1.85945	2.44766	0.0908978	No	0.544896	0.640414	0.592655	-1.1753	0.135017	No
chr1:29406916-29407198:AluJb	chr1	29406916	29407198	AluJb	-	SINE/Alu	AluJb	2.13828	0.849242	1.49376	2.51787	0.0686212	No	0	ENSG00000159023	EPB41	Intronic	0.536393	0.640152	0.588272	-1.19344	0.0952777	No	2.85498	1.25912	2.05705	2.26745	0.102343	No
chr1:29419068-29420137:L1PREC2	chr1	29419068	29420137	L1PREC2	-	LINE/L1	L1PREC2	1.23286	0.696719	0.964788	1.76952	0.242558	No	0	ENSG00000159023	EPB41	Intronic	0.536393	0.640152	0.588272	-1.19344	0.0952777	No	3.02977	3.18812	3.10894	-1.05227	0.923293	No
chr1:29452287-29452637:L2b	chr1	29452287	29452637	L2b	+	LINE/L2	L2b	10.7607	0.464781	5.61272	23.1521	6.99009e-09	Yes	-1841	ENSG00000253304	TMEM200B	Intergenic	8.29271	0.710198	4.50145	11.6766	1.40519e-07	Yes	0.553941	0.730718	0.64233	-1.31913	0.102343	No
chr1:29454125-29454238:MIRb	chr1	29454125	29454238	MIRb	-	SINE/MIR	MIRb	3.66774	0.464274	2.066	7.89993	1.88568e-05	Yes	-3679	ENSG00000253304	TMEM200B	Intergenic	0.536393	0.640152	0.588272	-1.19344	0.0952777	No	4.94248	0.662655	2.80257	7.4586	7.19888e-07	Yes
chr1:29454989-29455099:MIRb	chr1	29454989	29455099	MIRb	-	SINE/MIR	MIRb	4.52328	0.558607	2.54094	8.09741	5.14483e-05	Yes	-4543	ENSG00000253304	TMEM200B	Intergenic	0.536393	0.643912	0.590152	-1.20045	0.0952777	No	4.46951	0.703506	2.58651	6.3532	2.81131e-05	Yes
chr1:29455573-29455882:AluSx	chr1	29455573	29455882	AluSx	-	SINE/Alu	AluSx	4.10942	0.597827	2.35362	6.87393	0.000125496	Yes	-5127	ENSG00000253304	TMEM200B	Intergenic	0.536393	0.642131	0.589262	-1.19713	0.0952777	No	2.80618	0.650893	1.72854	4.31127	3.86987e-05	Yes
chr1:29455888-29456186:AluSx	chr1	29455888	29456186	AluSx	-	SINE/Alu	AluSx	2.68882	0.577626	1.63323	4.65495	0.000837511	Yes	-5442	ENSG00000253304	TMEM200B	Intergenic	0.536393	0.645139	0.590766	-1.20274	0.0952777	No	2.08965	0.648853	1.36925	3.22053	0.000339296	Yes
chr1:29456757-29458154:LTR12C	chr1	29456757	29458154	LTR12C	-	LTR/ERV1	LTR12C	6.61065	0.463798	3.53723	14.2533	2.22883e-06	Yes	-6311	ENSG00000253304	TMEM200B	Intergenic	0.678224	0.859324	0.768774	-1.26702	0.271022	No	8.57187	0.717817	4.64484	11.9416	3.23311e-08	Yes
chr1:2972106-2972291:AluSx3	chr1	2972106	2972291	AluSx3	-	SINE/Alu	AluSx3	2.2373	1.03447	1.63589	2.16275	0.193812	No	-13442	ENSG00000142611	PRDM16	Intergenic	10.7137	3.74384	7.22877	2.86169	0.0470062	Yes	0.536704	0.74748	0.642092	-1.39272	0.0900409	No
chr1:2972733-2973000:HAL1	chr1	2972733	2973000	HAL1	+	LINE/L1	HAL1	2.6568	1.5331	2.09495	1.73296	0.424328	No	-12733	ENSG00000142611	PRDM16	Intergenic	0.536393	0.640152	0.588272	-1.19344	0.0952777	No	11.3024	9.13985	10.2211	1.23661	0.612204	No
chr1:2973774-2974231:HAL1	chr1	2973774	2974231	HAL1	+	LINE/L1	HAL1	1.95524	1.74435	1.84979	1.1209	0.887038	No	-11502	ENSG00000142611	PRDM16	Intergenic	0.536393	0.640152	0.588272	-1.19344	0.0952777	No	6.52696	8.60518	7.56607	-1.3184	0.51513	No
chr1:2974477-2974908:MLT1D	chr1	2974477	2974908	MLT1D	-	LTR/ERVL-MaLR	MLT1D	3.1	1.50139	2.30069	2.06475	0.272308	No	-10825	ENSG00000142611	PRDM16	Intergenic	7.03721	6.46183	6.74952	1.08904	0.861616	No	0.704419	0.642394	0.673407	1.09655	0.538086	No
chr1:2974913-2975355:L2a	chr1	2974913	2975355	L2a	+	LINE/L2	L2a	2.16756	1.61413	1.89084	1.34287	0.682855	No	-10378	ENSG00000142611	PRDM16	Intergenic	0.536393	0.640152	0.588272	-1.19344	0.0952777	No	9.1247	5.99976	7.56223	1.52084	0.225534	No
chr1:31408042-31408143:L2c	chr1	31408042	31408143	L2c	+	LINE/L2	L2c	1.3607	0.846001	1.10335	1.60839	0.372877	No	0	ENSG00000134644	PUM1	Intronic	0.593805	0.786427	0.690116	-1.32439	0.144171	No	3.30519	13.4075	8.35633	-4.05649	0.00072537	Yes
chr1:31648617-31650508:SVA_D	chr1	31648617	31650508	SVA_D	+	Retroposon/SVA	SVA_D	0.693749	3.22195	1.95785	-4.64427	0.00980649	Yes	2085	ENSG00000084628	NKAIN1	afterGene	0.553583	0.697959	0.625771	-1.2608	0.0952777	No	0.646367	7.07597	3.86117	-10.9473	1.70049e-10	Yes
chr1:31650962-31651337:AluSx1	chr1	31650962	31651337	AluSx1	+	SINE/Alu	AluSx1	1.06238	8.17257	4.61747	-7.69273	0.000579565	Yes	1256	ENSG00000084628	NKAIN1	afterGene	0.536393	0.642131	0.589262	-1.19713	0.0952777	No	1.04628	10.6161	5.83121	-10.1465	3.01817e-10	Yes
chr1:31652212-31652484:AluSx	chr1	31652212	31652484	AluSx	-	SINE/Alu	AluSx	12.4031	237.349	124.876	-19.1362	1.04374e-09	Yes	109	ENSG00000084628	NKAIN1	afterGene	25.2894	265.236	145.263	-10.488	4.86793e-20	Yes	0.59139	0.899645	0.745518	-1.52124	0.0661074	No
chr1:31667249-31667553:AluSp	chr1	31667249	31667553	AluSp	-	SINE/Alu	AluSp	0.571631	0.746276	0.658953	-1.30552	0.501749	No	0	ENSG00000084628	NKAIN1	Intronic	0.820721	1.90352	1.36212	-2.31933	0.0724271	No	0.560789	0.745414	0.653101	-1.32922	0.102343	No
chr1:31667607-31667916:AluSg	chr1	31667607	31667916	AluSg	-	SINE/Alu	AluSg	0.68419	0.758269	0.72123	-1.10827	0.792954	No	0	ENSG00000084628	NKAIN1	Intronic	0.731464	4.24795	2.4897	-5.80746	2.31103e-05	Yes	0.536704	0.743479	0.640091	-1.38527	0.102343	No
chr1:31690661-31690753:MIR3	chr1	31690661	31690753	MIR3	+	SINE/MIR	MIR3	0.571055	0.742256	0.656656	-1.2998	0.52696	No	0	ENSG00000084628	NKAIN1	Intronic	0.544596	0.640152	0.592374	-1.17546	0.127035	No	0.855926	4.86382	2.85987	-5.68252	6.39178e-05	Yes
chr1:31690919-31691208:AluSc	chr1	31690919	31691208	AluSc	-	SINE/Alu	AluSc	0.571818	0.779333	0.675575	-1.3629	0.465713	No	0	ENSG00000084628	NKAIN1	Intronic	0.588992	4.58999	2.58949	-7.79295	1.9449e-07	Yes	0.583146	0.640414	0.61178	-1.0982	0.433051	No
chr1:31691862-31692454:MER115	chr1	31691862	31692454	MER115	-	DNA/hAT-Tip100	MER115	0.68641	0.789064	0.737737	-1.14955	0.77775	No	0	ENSG00000084628	NKAIN1	Intronic	0.868475	10.1282	5.49834	-11.6621	5.91139e-09	Yes	0.536704	0.640414	0.588559	-1.19324	0.102343	No
chr1:31825594-31827240:L1MB3	chr1	31825594	31827240	L1MB3	-	LINE/L1	L1MB3	16.4366	1.44621	8.94141	11.3653	0.00017073	Yes	0	ENSG00000121766	ZCCHC17	Intronic	6.47381	0.963552	3.71868	6.71869	4.8251e-05	Yes	21.0917	3.28773	12.1897	6.41527	2.32273e-06	Yes
chr1:31833015-31833307:AluSp	chr1	31833015	31833307	AluSp	-	SINE/Alu	AluSp	23.579	1.39108	12.485	16.9502	9.49394e-06	Yes	0	ENSG00000121766	ZCCHC17	Intronic	46.7775	2.62182	24.6997	17.8416	2.50406e-10	Yes	1.06168	1.4212	1.24144	-1.33864	0.451279	No
chr1:31838875-31838909:MIR	chr1	31838875	31838909	MIR	-	SINE/MIR	MIR	5.87861	9.29143	7.58502	-1.58055	0.343323	No	0	ENSG00000121769	FABP3	Intronic	1.31699	0.73879	1.02789	1.78264	0.0952777	No	2.88351	3.65097	3.26724	-1.26616	0.565227	No
chr1:31839881-31840115:MIRb	chr1	31839881	31840115	MIRb	-	SINE/MIR	MIRb	25.9648	25.0682	25.5165	1.03577	0.930249	No	0	ENSG00000121769	FABP3	Intronic	7.75077	0.905746	4.32826	8.55733	7.09994e-07	Yes	13.7528	16.6293	15.191	-1.20916	0.640993	No
chr1:31842966-31843138:MIRb	chr1	31842966	31843138	MIRb	-	SINE/MIR	MIRb	11.9414	21.8067	16.8741	-1.82614	0.082275	No	0	ENSG00000121769	FABP3	Intronic	0.641436	0.642915	0.642176	-1.00231	0.991011	No	24.095	27.9825	26.0387	-1.16134	0.548991	No
chr1:31843721-31843927:MIRb	chr1	31843721	31843927	MIRb	-	SINE/MIR	MIRb	21.6213	22.3603	21.9908	-1.03418	0.937848	No	0	ENSG00000121769	FABP3	Intronic	0.854364	0.751957	0.80316	1.13619	0.562386	No	32.6879	26.2347	29.4613	1.24598	0.398397	No
chr1:32094335-32094765:L3	chr1	32094335	32094765	L3	+	LINE/CR1	L3	9.46931	7.55388	8.51159	1.25357	0.734697	No	0	ENSG00000121764	HCRTR1	Intronic	10.745	7.53896	9.14198	1.42526	0.337547	No	0.59139	0.642394	0.616892	-1.08624	0.498017	No
chr1:32099275-32099588:AluSp	chr1	32099275	32099588	AluSp	+	SINE/Alu	AluSp	1.8704	3.65058	2.76049	-1.95176	0.335987	No	0	ENSG00000162517	PEF1	Intronic	2.35746	3.53599	2.94673	-1.49991	0.335865	No	4.18319	6.94204	5.56261	-1.65951	0.165076	No
chr1:32139164-32139388:MIRb	chr1	32139164	32139388	MIRb	-	SINE/MIR	MIRb	5.68963	0.636558	3.16309	8.93811	0.00138716	Yes	0	ENSG00000084636	COL16A1	Intronic	23.3078	1.88437	12.5961	12.369	1.03162e-06	Yes	0.536704	0.640414	0.588559	-1.19324	0.102343	No
chr1:32139520-32139935:L3	chr1	32139520	32139935	L3	+	LINE/CR1	L3	9.61076	0.580825	5.09579	16.5467	0.000109346	Yes	0	ENSG00000084636	COL16A1	Intronic	0.617824	0.689748	0.653786	-1.11642	0.514166	No	36.1518	2.22407	19.1879	16.2548	1.67492e-07	Yes
chr1:32152142-32152700:L2a	chr1	32152142	32152700	L2a	-	LINE/L2	L2a	8.86809	0.60697	4.73753	14.6104	9.03527e-05	Yes	0	ENSG00000084636	COL16A1	Intronic	32.0169	2.82124	17.4191	11.3485	6.23665e-07	Yes	0.536704	0.640414	0.588559	-1.19324	0.102343	No
chr1:32206609-32206895:L2b	chr1	32206609	32206895	L2b	-	LINE/L2	L2b	3.55352	3.42384	3.48868	1.03788	0.970151	No	0	ENSG00000121753	BAI2	Intronic	11.2678	37.07	24.1689	-3.28992	3.70279e-05	Yes	0.544896	0.667876	0.606386	-1.2257	0.105107	No
chr1:32212333-32213074:L2b	chr1	32212333	32213074	L2b	+	LINE/L2	L2b	5.10778	1.48284	3.29531	3.4446	0.0490789	Yes	0	ENSG00000121753	BAI2	Intronic	0.544596	0.642131	0.593363	-1.1791	0.124364	No	6.90815	7.28559	7.09687	-1.05464	0.890897	No
chr1:32567764-32567884:L2b	chr1	32567764	32567884	L2b	-	LINE/L2	L2b	6.47785	9.27637	7.87711	-1.43201	0.511402	No	0	ENSG00000121775	TMEM39B	Intronic	0.656897	0.745544	0.701221	-1.13495	0.556384	No	19.7614	52.5903	36.1759	-2.66126	0.000416134	Yes
chr1:32695832-32696122:AluSz6	chr1	32695832	32696122	AluSz6	-	SINE/Alu	AluSz6	2.60813	7.89166	5.24989	-3.02579	0.0180878	Yes	0	ENSG00000084623	EIF3I	Intronic	8.14005	14.7612	11.4506	-1.8134	0.0825675	No	1.10454	2.29711	1.70082	-2.07971	0.102343	No
chr1:32696159-32696448:AluSz	chr1	32696159	32696448	AluSz	+	SINE/Alu	AluSz	4.35928	12.1572	8.25822	-2.7888	0.0321712	Yes	0	ENSG00000084623	EIF3I	Intronic	1.79305	3.34667	2.56986	-1.86647	0.115502	No	7.02691	25.7198	16.3734	-3.66018	3.95465e-06	Yes
chr1:32709050-32709358:AluSz	chr1	32709050	32709358	AluSz	+	SINE/Alu	AluSz	0.572552	3.08176	1.82716	-5.3825	0.00482497	Yes	-3477	ENSG00000183615	FAM167B	Intergenic	1.12523	6.0355	3.58036	-5.36378	4.55682e-06	Yes	0.536704	0.691298	0.614001	-1.28804	0.0896417	No
chr1:32710352-32710663:AluJr	chr1	32710352	32710663	AluJr	-	SINE/Alu	AluJr	0.683423	4.75065	2.71704	-6.95126	0.00134507	Yes	-2172	ENSG00000183615	FAM167B	Intergenic	0.536393	0.640152	0.588272	-1.19344	0.0952777	No	0.670141	7.21283	3.94149	-10.7632	6.72275e-09	Yes
chr1:32710948-32711177:AluJo	chr1	32710948	32711177	AluJo	+	SINE/Alu	AluJo	0.688175	3.47561	2.08189	-5.05048	0.00511913	Yes	-1658	ENSG00000183615	FAM167B	Intergenic	0.969366	5.2642	3.11679	-5.43056	8.64237e-06	Yes	0.536704	0.670152	0.603428	-1.24864	0.102343	No
chr1:32711365-32711543:L1ME3A	chr1	32711365	32711543	L1ME3A	+	LINE/L1	L1ME3A	0.57232	3.75996	2.16614	-6.56968	0.00160134	Yes	-1292	ENSG00000183615	FAM167B	Intergenic	1.1115	5.72832	3.41991	-5.15368	1.99101e-05	Yes	0.536704	0.640414	0.588559	-1.19324	0.102343	No
chr1:32711544-32711845:AluSq	chr1	32711544	32711845	AluSq	-	SINE/Alu	AluSq	0.693855	3.48581	2.08983	-5.02382	0.00640258	Yes	-990	ENSG00000183615	FAM167B	Intergenic	0.536393	0.640152	0.588272	-1.19344	0.0952777	No	1.34957	9.81466	5.58211	-7.27244	4.91824e-08	Yes
chr1:32711949-32712257:AluSc8	chr1	32711949	32712257	AluSc8	-	SINE/Alu	AluSc8	0.820198	3.94436	2.38228	-4.80904	0.019195	Yes	-578	ENSG00000183615	FAM167B	Intergenic	0.536393	0.640152	0.588272	-1.19344	0.0952777	No	1.25694	12.5169	6.88692	-9.95823	4.18115e-09	Yes
chr1:32712383-32712523:MIRc	chr1	32712383	32712523	MIRc	-	SINE/MIR	MIRc	0.822807	4.86822	2.84551	-5.91661	0.00351885	Yes	-312	ENSG00000183615	FAM167B	Intergenic	0.536393	0.640152	0.588272	-1.19344	0.0952777	No	1.17675	10.9839	6.08032	-9.33411	1.24743e-08	Yes
chr1:32713701-32713799:MER5B	chr1	32713701	32713799	MER5B	-	DNA/hAT-Charlie	MER5B	1.17194	6.79834	3.98514	-5.80095	0.00373498	Yes	0	ENSG00000183615	FAM167B	Intronic	0.536393	0.640152	0.588272	-1.19344	0.0952777	No	1.69702	12.4334	7.06519	-7.32656	3.57983e-08	Yes
chr1:32830048-32830337:AluSx1	chr1	32830048	32830337	AluSx1	-	SINE/Alu	AluSx1	3.47528	6.94769	5.21148	-1.99917	0.259913	No	136	ENSG00000162526	TSSK3	afterGene	11.0516	30.4337	20.7427	-2.75377	0.000367955	Yes	0.684302	0.656548	0.670425	1.04227	0.794759	No
chr1:32897938-32903639:HERVH-int	chr1	32897938	32903639	LTR7|HERVH-int|HERVH-int|HERVH-int|HERVH-int|HERVH-int|HERVH-int|LTR7	+	LTR/ERV1	HERVH-int	1.31002	0.865798	1.08791	1.51307	0.458786	No	-27020	ENSG00000254553	RP1-27O5.3	Intergenic	1.22455	1.45604	1.34029	-1.18904	0.696449	No	0.544896	0.640414	0.592655	-1.1753	0.135017	No
chr1:32971486-32971985:L1ME1	chr1	32971486	32971985	L1ME1	+	LINE/L1	L1ME1	1.19585	1.98835	1.5921	-1.66271	0.470774	No	0	ENSG00000254553	RP1-27O5.3	Intronic	5.2201	14.899	10.0596	-2.85416	0.0139595	Yes	0.662711	0.713813	0.688262	-1.07711	0.677688	No
chr1:33088805-33089233:L2a	chr1	33088805	33089233	L2a	+	LINE/L2	L2a	5.11234	1.36826	3.2403	3.73638	0.0687654	No	0	ENSG00000176261	ZBTB8OS	Intronic	0.548921	0.709536	0.629228	-1.2926	0.0952777	No	11.6374	19.8484	15.7429	-1.70557	0.102343	No
chr1:33142637-33143376:MER21C	chr1	33142637	33143376	MER21C	+	LTR/ERVL	MER21C	2.78956	5.33685	4.06321	-1.91315	0.482521	No	0	ENSG00000162521	RBBP4	Intronic	8.73116	51.6307	30.1809	-5.91339	4.73994e-08	Yes	0.678373	0.783457	0.730915	-1.15491	0.507561	No
chr1:33234570-33234872:AluY	chr1	33234570	33234872	AluY	+	SINE/Alu	AluY	2.94645	7.20729	5.07687	-2.44609	0.0703035	No	0	ENSG00000162522	KIAA1522	Intronic	5.58163	9.7805	7.68107	-1.75226	0.0952777	No	0.536704	0.690137	0.61342	-1.28588	0.102343	No
chr1:33355010-33355485:L1MC4	chr1	33355010	33355485	L1MC4	-	LINE/L1	L1MC4	11.6132	2.55942	7.08631	4.53744	0.0108983	Yes	0	ENSG00000121905	HPCA	Intronic	1.58179	2.02908	1.80544	-1.28277	0.591382	No	23.0975	2.94386	13.0207	7.84601	1.45265e-06	Yes
chr1:33393672-33394590:ERVL-E-int	chr1	33393672	33394590	ERVL-E-int|ERVL-E-int|ERVL-E-int	-	LTR/ERVL	ERVL-E-int	9.05486	3.64036	6.34761	2.48735	0.0531165	No	7457	ENSG00000116514	RNF19B	Intergenic	6.88167	7.13446	7.00807	-1.03673	0.923294	No	0.544896	0.640414	0.592655	-1.1753	0.135017	No
chr1:33394591-33395046:MLT1C	chr1	33394591	33395046	MLT1C	-	LTR/ERVL-MaLR	MLT1C	19.0919	12.4963	15.7941	1.5278	0.387626	No	7001	ENSG00000116514	RNF19B	Intergenic	40.097	23.2891	31.6931	1.72171	0.0559645	No	1.07056	0.684409	0.877483	1.56421	0.102343	No
chr1:33395047-33395711:ERVL-E-int	chr1	33395047	33395711	ERVL-E-int|ERVL-E-int	-	LTR/ERVL	ERVL-E-int	31.0937	19.963	25.5284	1.55756	0.261528	No	6336	ENSG00000116514	RNF19B	Intergenic	38.2512	32.2195	35.2353	1.18721	0.463508	No	0.553941	0.688885	0.621413	-1.24361	0.123438	No
chr1:33396703-33396953:ERVL-E-int	chr1	33396703	33396953	ERVL-E-int	-	LTR/ERVL	ERVL-E-int	6.75584	4.86983	5.81283	1.38729	0.571664	No	5094	ENSG00000116514	RNF19B	Intergenic	9.9155	9.64517	9.78033	1.02803	0.946006	No	0.536704	0.688761	0.612732	-1.28332	0.0965669	No
chr1:33397624-33398189:LTR67B	chr1	33397624	33398189	LTR67B	-	LTR/ERVL	LTR67B	16.494	14.142	15.318	1.16631	0.753028	No	3858	ENSG00000116514	RNF19B	afterGene	8.10959	11.1582	9.63388	-1.37592	0.358034	No	0.536704	0.659803	0.598253	-1.22936	0.102343	No
chr1:33398363-33398816:L2a	chr1	33398363	33398816	L2a	+	LINE/L2	L2a	17.5496	11.6654	14.6075	1.50442	0.363408	No	3231	ENSG00000116514	RNF19B	afterGene	0.536393	0.717088	0.62674	-1.33687	0.0735616	No	11.5261	12.561	12.0435	-1.08978	0.817106	No
chr1:33478216-33478518:AluJb	chr1	33478216	33478518	AluJb	+	SINE/Alu	AluJb	17.9698	30.4263	24.198	-1.69319	0.146098	No	0	ENSG00000004455	AK2	Intronic	0.634	0.640152	0.637076	-1.0097	0.949295	No	29.0048	67.764	48.3844	-2.3363	0.000722118	Yes
chr1:33588475-33589049:L2a	chr1	33588475	33589049	L2a	+	LINE/L2	L2a	9.03918	3.40262	6.2209	2.65654	0.0875927	No	2345	ENSG00000142920	ADC	afterGene	40.472	8.52487	24.4984	4.74752	9.99291e-05	Yes	0.586221	0.713211	0.649716	-1.21662	0.304775	No
chr1:33733972-33734611:L2c	chr1	33733972	33734611	L2c	-	LINE/L2	L2c	3.17338	2.30572	2.73955	1.37631	0.675964	No	0	ENSG00000160094	ZNF362	Intronic	0.556911	0.730648	0.643779	-1.31197	0.0952777	No	8.39105	14.3895	11.3903	-1.71486	0.102343	No
chr1:33774382-33775959:SVA_A	chr1	33774382	33775959	SVA_A	-	Retroposon/SVA	SVA_A	1.87445	2.02364	1.94904	-1.07959	0.922663	No	0	ENSG00000184389	A3GALT2	Intronic	5.26638	11.2737	8.27003	-2.14069	0.069914	No	0.774211	0.805236	0.789724	-1.04007	0.885053	No
chr1:33792569-33793558:MLT1F-int	chr1	33792569	33793558	MLT1F-int|MLT1F	+	LTR/ERVL-MaLR	MLT1F-int	7.43104	5.55388	6.49246	1.33799	0.726569	No	0	ENSG00000134686	PHC2	Intronic	1.47542	1.57708	1.52625	-1.0689	0.878734	No	17.2323	62.7789	40.0056	-3.64309	2.34802e-07	Yes
chr1:34287241-34287620:L2d2	chr1	34287241	34287620	L2d2	-	LINE/L2	L2d2	2.06906	3.03783	2.55345	-1.46822	0.626061	No	0	ENSG00000121904	CSMD2	Intronic	6.52196	12.643	9.5825	-1.93853	0.0952777	No	0.536704	0.640414	0.588559	-1.19324	0.102343	No
chr1:35175562-35176045:MLT1J	chr1	35175562	35176045	MLT1J	-	LTR/ERVL-MaLR	MLT1J	1.17143	0.558247	0.864838	2.09841	0.0444642	Yes	2294	ENSG00000163866	SMIM12	afterGene	2.03547	1.22565	1.63056	1.66073	0.229704	No	0.536704	0.640414	0.588559	-1.19324	0.102343	No
chr1:35326972-35327544:LTR48B	chr1	35326972	35327544	LTR48B	-	LTR/ERV1	LTR48B	593.418	16.2833	304.851	36.4433	8.60183e-10	Yes	-1556	ENSG00000163866	SMIM12	Intergenic	935.319	49.2236	492.271	19.0014	3.22957e-15	Yes	0.952773	0.642394	0.797583	1.48316	0.0633706	No
chr1:35327636-35327896:L2c	chr1	35327636	35327896	L2c	-	LINE/L2	L2c	338.582	9.09686	173.84	37.2197	1.15945e-09	Yes	-2220	ENSG00000163866	SMIM12	Intergenic	402.649	29.3689	216.009	13.71	1.4963e-13	Yes	0.583146	0.640414	0.61178	-1.0982	0.433051	No
chr1:35327897-35328126:MIR	chr1	35327897	35328126	MIR	+	SINE/MIR	MIR	189.55	5.97773	97.764	31.7094	4.76716e-08	Yes	-2481	ENSG00000163866	SMIM12	Intergenic	0.643042	0.640152	0.641597	1.00451	0.981548	No	330.207	25.0948	177.651	13.1583	7.83881e-12	Yes
chr1:35328305-35328387:L2c	chr1	35328305	35328387	L2c	+	LINE/L2	L2c	185.421	6.15406	95.7877	30.1299	1.3044e-07	Yes	2651	ENSG00000116544	DLGAP3	afterGene	1.7423	0.761028	1.25166	2.2894	0.0264404	Yes	244.297	10.3424	127.32	23.6208	2.20834e-13	Yes
chr1:35328467-35328686:L2c	chr1	35328467	35328686	L2c	+	LINE/L2	L2c	232.542	8.11232	120.327	28.6654	4.74809e-07	Yes	2352	ENSG00000116544	DLGAP3	afterGene	1.02474	0.65832	0.841532	1.55661	0.08552	No	241.444	13.2235	127.334	18.2587	7.86979e-12	Yes
chr1:35328687-35329007:MSTD	chr1	35328687	35329007	MSTD	+	LTR/ERVL-MaLR	MSTD	205.367	6.19951	105.783	33.1263	3.93428e-07	Yes	2031	ENSG00000116544	DLGAP3	afterGene	0.544596	0.640152	0.592374	-1.17546	0.127035	No	130.527	9.50236	70.0145	13.7362	4.50533e-10	Yes
chr1:35329008-35329150:L2c	chr1	35329008	35329150	L2c	+	LINE/L2	L2c	121.17	3.76447	62.4673	32.1878	8.36858e-08	Yes	1888	ENSG00000116544	DLGAP3	afterGene	0.536393	0.640152	0.588272	-1.19344	0.0952777	No	101.083	7.32703	54.2049	13.7959	3.33755e-08	Yes
chr1:35329274-35329401:MIR	chr1	35329274	35329401	MIR	+	SINE/MIR	MIR	90.7663	4.01633	47.3913	22.5993	6.64181e-09	Yes	1637	ENSG00000116544	DLGAP3	afterGene	0.536393	0.654642	0.595518	-1.22045	0.0952777	No	99.0125	7.03324	53.0229	14.0778	8.0771e-08	Yes
chr1:35329424-35329519:L3b	chr1	35329424	35329519	L3b	-	LINE/CR1	L3b	27.5023	1.19468	14.3485	23.0207	2.81655e-06	Yes	1519	ENSG00000116544	DLGAP3	afterGene	21.4912	2.28181	11.8865	9.41847	1.95866e-06	Yes	0.536704	0.640414	0.588559	-1.19324	0.102343	No
chr1:35329512-35329614:MER5A	chr1	35329512	35329614	MER5A	-	DNA/hAT-Charlie	MER5A	82.2108	3.6498	42.9303	22.5248	7.96076e-08	Yes	1424	ENSG00000116544	DLGAP3	afterGene	62.1074	6.04678	34.0771	10.2712	3.3881e-08	Yes	0.536704	0.708035	0.622369	-1.31923	0.0791718	No
chr1:35329749-35329789:L2c	chr1	35329749	35329789	L2c	+	LINE/L2	L2c	92.7541	2.95642	47.8552	31.3737	3.82674e-07	Yes	1249	ENSG00000116544	DLGAP3	afterGene	0.640754	0.646524	0.643639	-1.00901	0.957746	No	86.2607	6.61751	46.4391	13.0352	8.30674e-09	Yes
chr1:35329859-35330110:L2c	chr1	35329859	35330110	L2c	+	LINE/L2	L2c	253.247	10.1189	131.683	25.027	3.8972e-07	Yes	928	ENSG00000116544	DLGAP3	afterGene	0.881116	0.646919	0.764018	1.36202	0.0952777	No	206.711	13.3209	110.016	15.5178	2.20679e-09	Yes
chr1:35330290-35330448:MIRb	chr1	35330290	35330448	MIRb	+	SINE/MIR	MIRb	162.436	6.41619	84.4261	25.3166	7.6644e-09	Yes	590	ENSG00000116544	DLGAP3	afterGene	0.777175	0.684973	0.731074	1.13461	0.479329	No	84.0373	8.20414	46.1207	10.2433	7.96754e-07	Yes
chr1:35366268-35367016:L2b	chr1	35366268	35367016	L2b	-	LINE/L2	L2b	8.80756	1.47837	5.14296	5.95761	0.0108949	Yes	0	ENSG00000116544	DLGAP3	Intronic	29.6671	8.40827	19.0377	3.52833	0.00168494	Yes	0.536704	0.640414	0.588559	-1.19324	0.102343	No
chr1:3539982-3540348:LTR40c	chr1	3539982	3540348	LTR40c|LTR40c	+	LTR/ERVL	LTR40c	4.17897	2.22067	3.19982	1.88185	0.334205	No	-1219	ENSG00000158109	TPRG1L	Intergenic	0.688457	0.661043	0.67475	1.04147	0.808821	No	27.6775	19.3262	23.5019	1.43213	0.205547	No
chr1:35567471-35568693:Charlie1	chr1	35567471	35568693	Charlie1	-	DNA/hAT-Charlie	Charlie1	10.0277	29.0762	19.5519	-2.8996	0.00230095	Yes	0	ENSG00000197056	ZMYM1	Intronic	0.536393	0.861234	0.698813	-1.6056	0.0356014	No	13.5867	76.8343	45.2105	-5.6551	2.27065e-08	Yes
chr1:35582061-35582357:AluSq2	chr1	35582061	35582357	AluSq2	-	SINE/Alu	AluSq2	2.34854	8.50713	5.42783	-3.62231	0.0246945	Yes	602	ENSG00000197056	ZMYM1	afterGene	0.536393	0.644514	0.590453	-1.20157	0.0952777	No	4.43631	25.6513	15.0438	-5.78213	3.98026e-07	Yes
chr1:35582912-35583222:AluSx1	chr1	35582912	35583222	AluSx1	-	SINE/Alu	AluSx1	1.2573	5.31685	3.28708	-4.22879	0.0221083	Yes	1453	ENSG00000197056	ZMYM1	afterGene	0.659908	0.815289	0.737598	-1.23546	0.319965	No	2.24006	15.4864	8.86321	-6.91335	1.29883e-07	Yes
chr1:35583260-35583556:AluSp	chr1	35583260	35583556	AluSp	+	SINE/Alu	AluSp	5.07586	15.2674	10.1716	-3.00785	0.0495754	Yes	1801	ENSG00000197056	ZMYM1	afterGene	6.2322	30.7578	18.495	-4.9353	6.12901e-08	Yes	0.536704	0.86045	0.698577	-1.60321	0.0261888	No
chr1:35584045-35584317:AluYc	chr1	35584045	35584317	AluYc	+	SINE/Alu	AluYc	1.89534	3.44363	2.66948	-1.81689	0.432809	No	2586	ENSG00000197056	ZMYM1	afterGene	1.97922	11.8457	6.91246	-5.98503	6.67903e-07	Yes	0.536704	0.642736	0.58972	-1.19756	0.102343	No
chr1:35641310-35641398:Tigger7	chr1	35641310	35641398	Tigger7	-	DNA/TcMar-Tigger	Tigger7	3.46897	6.46446	4.96672	-1.86351	0.294957	No	582	ENSG00000116560	SFPQ	afterGene	20.4985	35.6491	28.0738	-1.73911	0.0812131	No	0.536704	0.647992	0.592348	-1.20736	0.102343	No
chr1:35642189-35642491:AluY	chr1	35642189	35642491	AluY	+	SINE/Alu	AluY	2.36562	1.90147	2.13355	1.2441	0.806419	No	0	ENSG00000116560	SFPQ	Intronic	0.536393	0.640152	0.588272	-1.19344	0.0952777	No	10.4964	55.6934	33.0949	-5.30596	1.40796e-07	Yes
chr1:35903829-35904043:L2b	chr1	35903829	35904043	L2b	+	LINE/L2	L2b	6.53728	1.03696	3.78712	6.30428	0.00798733	Yes	0	ENSG00000142687	KIAA0319L	Intronic	0.553583	0.833107	0.693345	-1.50494	0.0812681	No	20.168	19.0019	19.5849	1.06137	0.85732	No
chr1:35912028-35912842:L2	chr1	35912028	35912842	L2	+	LINE/L2	L2	2.32864	1.00572	1.66718	2.3154	0.177005	No	0	ENSG00000142687	KIAA0319L	Intronic	0.544596	0.673935	0.609265	-1.2375	0.0952777	No	6.76601	7.99982	7.38292	-1.18235	0.680108	No
chr1:35990312-35991857:L1MA4A	chr1	35990312	35991857	L1MA4A	-	LINE/L1	L1MA4A	2.81528	3.5404	3.17784	-1.25756	0.706935	No	0	ENSG00000142687	KIAA0319L	Intronic	9.87721	19.414	14.6456	-1.96554	0.0888274	No	0.802487	0.782325	0.792406	1.02577	0.91931	No
chr1:36030580-36030732:MIR	chr1	36030580	36030732	MIR	-	SINE/MIR	MIR	17.4419	9.22409	13.333	1.89091	0.210766	No	0	ENSG00000020129	NCDN	Intronic	0.726946	0.727738	0.727342	-1.00109	0.996192	No	59.582	54.4889	57.0354	1.09347	0.709444	No
chr1:36033992-36034502:L2	chr1	36033992	36034502	L2	-	LINE/L2	L2	2.44844	0.835443	1.64194	2.93071	0.0404466	Yes	1118	ENSG00000020129	NCDN	afterGene	0.610576	0.874845	0.74271	-1.43282	0.133173	No	5.90413	3.14577	4.52495	1.87685	0.187438	No
chr1:36036079-36036432:L2c	chr1	36036079	36036432	L2c	-	LINE/L2	L2c	5.81229	1.12306	3.46767	5.17542	0.0151007	Yes	-2540	ENSG00000116819	TFAP2E	Intergenic	13.2	14.4211	13.8106	-1.09251	0.790688	No	10.8013	6.78898	8.79512	1.591	0.214342	No
chr1:36038494-36038696:MIRc	chr1	36038494	36038696	MIRc	-	SINE/MIR	MIRc	3.42211	1.32119	2.37165	2.59016	0.20707	No	-276	ENSG00000116819	TFAP2E	Intergenic	1.70984	1.97098	1.84041	-1.15273	0.756805	No	10.3522	8.00562	9.17889	1.29311	0.483188	No
chr1:36065167-36065439:L2	chr1	36065167	36065439	L2	-	LINE/L2	L2	6.5174	7.89015	7.20377	-1.21063	0.743181	No	1747	ENSG00000126067	PSMB2	afterGene	21.4935	34.3976	27.9456	-1.60038	0.0952777	No	0.680282	0.667876	0.674079	1.01858	0.932455	No
chr1:36066124-36066344:L2	chr1	36066124	36066344	L2	-	LINE/L2	L2	6.77554	18.6918	12.7337	-2.75872	0.0217509	Yes	842	ENSG00000126067	PSMB2	afterGene	18.5244	44.8591	31.6917	-2.42162	0.000222068	Yes	0.659731	0.640414	0.650073	1.03016	0.848278	No
chr1:36201027-36201323:AluSz	chr1	36201027	36201323	AluSz	+	SINE/Alu	AluSz	9.04512	5.83461	7.43986	1.55025	0.539973	No	0	ENSG00000092853	CLSPN	Intronic	0.592002	0.640152	0.616077	-1.08133	0.519903	No	11.2472	29.4408	20.344	-2.61762	0.00850478	Yes
chr1:36201539-36201841:AluSz	chr1	36201539	36201841	AluSz	+	SINE/Alu	AluSz	4.12002	5.54449	4.83226	-1.34574	0.672952	No	0	ENSG00000092853	CLSPN	Intronic	0.536393	0.691398	0.613895	-1.28898	0.0952777	No	8.59002	21.4508	15.0204	-2.49717	0.00809538	Yes
chr1:36327425-36327810:L2a	chr1	36327425	36327810	L2a	-	LINE/L2	L2a	1.40861	7.92413	4.66637	-5.62551	0.00138797	Yes	3935	ENSG00000134698	AGO4	afterGene	0.536393	0.809433	0.672913	-1.50903	0.04278	No	3.04988	15.9519	9.50087	-5.23032	1.36596e-06	Yes
chr1:36451466-36452006:L1ME3E	chr1	36451466	36452006	L1ME3E	+	LINE/L1	L1ME3E	4.44075	1.38131	2.91103	3.21487	0.0480229	Yes	0	ENSG00000126070	AGO3	Intronic	8.1479	8.89955	8.52373	-1.09225	0.82766	No	0.536704	0.819623	0.678163	-1.52714	0.0476393	No
chr1:36639180-36639406:X6a_DNA	chr1	36639180	36639406	X6a_DNA	-	DNA/TcMar-Tigger	X6a_DNA	12.3668	2.79156	7.57916	4.43006	0.0597432	No	0	ENSG00000116871	MAP7D1	Intronic	0.544596	0.644514	0.594555	-1.18347	0.116441	No	28.935	31.7164	30.3257	-1.09613	0.812314	No
chr1:36639651-36639866:MIRb	chr1	36639651	36639866	MIRb	+	SINE/MIR	MIRb	8.43682	4.19975	6.31828	2.00889	0.447284	No	0	ENSG00000116871	MAP7D1	Intronic	27.6858	47.8177	37.7517	-1.72716	0.0952777	No	0.536704	0.640414	0.588559	-1.19324	0.102343	No
chr1:36790643-36790931:AluJb	chr1	36790643	36790931	AluJb	-	SINE/Alu	AluJb	10.3669	1.51408	5.94049	6.84702	0.00235751	Yes	0	ENSG00000116883	RP11-268J15.5	Intronic	0.536393	0.640152	0.588272	-1.19344	0.0952777	No	21.5531	9.45018	15.5017	2.28071	0.0118026	Yes
chr1:36791448-36791819:L2a	chr1	36791448	36791819	L2a	-	LINE/L2	L2a	21.2253	1.76232	11.4938	12.044	0.000386394	Yes	0	ENSG00000116883	RP11-268J15.5	Intronic	0.698534	0.640152	0.669343	1.0912	0.558301	No	47.678	14.741	31.2095	3.23438	3.93199e-05	Yes
chr1:36791820-36792130:AluSp	chr1	36791820	36792130	AluSp	-	SINE/Alu	AluSp	9.06992	1.60289	5.33641	5.65847	0.00498681	Yes	0	ENSG00000116883	RP11-268J15.5	Intronic	0.536393	0.681432	0.608912	-1.2704	0.0952777	No	24.3193	10.9124	17.6158	2.2286	0.00880045	Yes
chr1:36792131-36792685:L2a	chr1	36792131	36792685	L2a	-	LINE/L2	L2a	32.8545	4.8522	18.8534	6.77106	0.000405956	Yes	0	ENSG00000116883	RP11-268J15.5	Intronic	0.835168	0.724069	0.779619	1.15344	0.484728	No	77.6998	16.1973	46.9485	4.79709	4.75291e-07	Yes
chr1:36792693-36792850:L2a	chr1	36792693	36792850	L2a	-	LINE/L2	L2a	20.619	3.23134	11.9252	6.38096	0.000786339	Yes	0	ENSG00000116883	RP11-268J15.5	Intronic	0.548921	0.667841	0.608381	-1.21664	0.111132	No	42.0361	9.13085	25.5835	4.60375	4.03403e-06	Yes
chr1:36920878-36921213:L2c	chr1	36920878	36921213	L2c	+	LINE/L2	L2c	22.9823	8.54151	15.7619	2.69066	0.00833006	Yes	107	ENSG00000116898	MRPS15	afterGene	0.583067	0.640152	0.61161	-1.0979	0.428896	No	38.0273	13.9994	26.0133	2.71635	0.000303381	Yes
chr1:37267854-37267915:MIRc	chr1	37267854	37267915	MIRc	-	SINE/MIR	MIRc	0.572491	5.82499	3.19874	-10.1748	0.000441516	Yes	0	ENSG00000163873	GRIK3	Intronic	1.12844	9.62859	5.37851	-8.53269	9.86093e-09	Yes	0.583146	0.642394	0.61277	-1.1016	0.41845	No
chr1:37267944-37268089:L2b	chr1	37267944	37268089	L2b	+	LINE/L2	L2b	0.683632	7.28078	3.98221	-10.6501	0.000606689	Yes	0	ENSG00000163873	GRIK3	Intronic	0.582982	0.644352	0.613667	-1.10527	0.400427	No	1.07043	13.2265	7.14848	-12.3562	3.61268e-09	Yes
chr1:37268520-37268987:L2a	chr1	37268520	37268987	L2a	-	LINE/L2	L2a	1.41731	21.5365	11.4769	-15.1953	9.01885e-05	Yes	0	ENSG00000163873	GRIK3	Intronic	1.04146	20.2335	10.6375	-19.428	6.97758e-11	Yes	0.750303	0.707546	0.728925	1.06043	0.756184	No
chr1:37269025-37269328:AluSc	chr1	37269025	37269328	AluSc	-	SINE/Alu	AluSc	2.54017	27.4187	14.9794	-10.794	8.70855e-06	Yes	0	ENSG00000163873	GRIK3	Intronic	2.61894	28.2655	15.4422	-10.7927	3.93886e-11	Yes	0.536704	0.693028	0.614866	-1.29127	0.102343	No
chr1:37269388-37269711:L1M5	chr1	37269388	37269711	L1M5	-	LINE/L1	L1M5	2.75825	44.2719	23.5151	-16.0507	4.64102e-06	Yes	0	ENSG00000163873	GRIK3	Intronic	4.76642	43.6602	24.2133	-9.15995	1.73872e-10	Yes	0.536704	0.880823	0.708763	-1.64117	0.0453518	No
chr1:37269869-37270046:MER5B	chr1	37269869	37270046	MER5B	+	DNA/hAT-Charlie	MER5B	2.41657	25.2671	13.8418	-10.4558	8.07649e-05	Yes	0	ENSG00000163873	GRIK3	Intronic	0.663309	0.692636	0.677973	-1.04421	0.807725	No	2.27437	22.4644	12.3694	-9.87721	4.35583e-10	Yes
chr1:3778388-3779433:L1MB8	chr1	3778388	3779433	L1MB8	+	LINE/L1	L1MB8	6.54837	3.14595	4.84716	2.08152	0.249105	No	0	ENSG00000169598	DFFB	Intronic	20.0504	23.5159	21.7831	-1.17284	0.629112	No	0.59139	0.81649	0.70394	-1.38063	0.109915	No
chr1:3779661-3780524:L1MB8	chr1	3779661	3780524	L1MB8	+	LINE/L1	L1MB8	7.95844	4.6225	6.29047	1.72168	0.342832	No	0	ENSG00000169598	DFFB	Intronic	14.1423	20.5779	17.3601	-1.45506	0.27115	No	0.620446	0.640414	0.63043	-1.03218	0.819977	No
chr1:37956143-37956311:FAM	chr1	37956143	37956311	FAM	-	SINE/Alu	FAM	24.3813	42.5389	33.4601	-1.74474	0.153534	No	1866	ENSG00000163875	MEAF6	afterGene	28.9388	30.5901	29.7645	-1.05706	0.819692	No	0.536704	0.640414	0.588559	-1.19324	0.102343	No
chr1:37956346-37956650:AluSx4	chr1	37956346	37956650	AluSx4	+	SINE/Alu	AluSx4	23.5133	34.1324	28.8229	-1.45162	0.310425	No	1527	ENSG00000163875	MEAF6	afterGene	0.536393	0.640152	0.588272	-1.19344	0.0952777	No	13.9133	24.3984	19.1559	-1.7536	0.0537274	No
chr1:37956825-37957026:AluSx	chr1	37956825	37957026	AluSx	+	SINE/Alu	AluSx	17.7319	21.9693	19.8506	-1.23897	0.559922	No	1151	ENSG00000163875	MEAF6	afterGene	0.536393	0.640152	0.588272	-1.19344	0.0952777	No	11.3942	15.2202	13.3072	-1.33579	0.268158	No
chr1:37957636-37957928:AluYj4	chr1	37957636	37957928	AluYj4	-	SINE/Alu	AluYj4	9.21461	23.6331	16.4238	-2.56474	0.0326796	Yes	249	ENSG00000163875	MEAF6	afterGene	5.47598	8.66663	7.07131	-1.58266	0.127035	No	0.536704	0.640414	0.588559	-1.19324	0.102343	No
chr1:38223953-38225197:L2c	chr1	38223953	38225197	L2c	+	LINE/L2	L2c	6.77936	4.58031	5.67984	1.48011	0.519817	No	0	ENSG00000183317	EPHA10	Intronic	0.905694	0.979633	0.942663	-1.08164	0.841924	No	27.36	7.35745	17.3587	3.71868	3.87176e-05	Yes
chr1:38267245-38267546:AluSx	chr1	38267245	38267546	AluSx	+	SINE/Alu	AluSx	14.3427	17.1292	15.736	-1.19428	0.699998	No	437	ENSG00000185090	MANEAL	afterGene	28.5136	35.2026	31.8581	-1.23459	0.383601	No	0.544896	0.708733	0.626814	-1.30068	0.102343	No
chr1:38267878-38268174:AluSz6	chr1	38267878	38268174	AluSz6	+	SINE/Alu	AluSz6	21.7916	25.5439	23.6678	-1.17219	0.698037	No	443	ENSG00000196449	YRDC	afterGene	22.5338	29.4938	26.0138	-1.30887	0.304963	No	0.553941	0.688885	0.621413	-1.24361	0.130238	No
chr1:38270655-38270952:AluSz	chr1	38270655	38270952	AluSz	+	SINE/Alu	AluSz	28.404	20.2981	24.351	1.39935	0.457026	No	0	ENSG00000196449	YRDC	Intronic	24.2352	35.7963	30.0157	-1.47704	0.0952777	No	0.765921	2.7037	1.73481	-3.53001	0.00400167	Yes
chr1:38350804-38351113:AluY	chr1	38350804	38351113	AluY	+	SINE/Alu	AluY	1.67685	0.741104	1.20898	2.26264	0.108669	No	0	ENSG00000204084	INPP5B	Intronic	0.583067	0.640152	0.61161	-1.0979	0.428896	No	2.03276	1.57585	1.80431	1.28995	0.591538	No
chr1:38374262-38378647:HERVH-int	chr1	38374262	38378647	HERVH-int|HERVH-int|HERVH-int|HERVH-int|HERVH-int	+	LTR/ERV1	HERVH-int	13.2831	1.50966	7.39637	8.79874	0.000330346	Yes	0	ENSG00000204084	INPP5B	Intronic	22.4156	0.822931	11.6193	27.2387	2.13665e-11	Yes	13.2522	2.50749	7.87982	5.28502	0.000157272	Yes
chr1:38765828-38766338:L1ME4a	chr1	38765828	38766338	L1ME4a	+	LINE/L1	L1ME4a	2.09313	0.929209	1.51117	2.25259	0.234867	No	-253379	ENSG00000185668	POU3F1	Intergenic	0.63871	0.676454	0.657582	-1.05909	0.703644	No	16.1964	3.09175	9.64408	5.2386	9.71584e-05	Yes
chr1:39472106-39472253:LTR104_Mam	chr1	39472106	39472253	LTR104_Mam	+	LTR/Gypsy	LTR104_Mam	14.8395	11.0631	12.9513	1.34135	0.459915	No	376	ENSG00000174574	AKIRIN1	afterGene	18.3387	13.6495	15.9941	1.34355	0.3093	No	0.71706	0.642394	0.679727	1.11623	0.475646	No
chr1:39472609-39472890:AluSx1	chr1	39472609	39472890	AluSx1	+	SINE/Alu	AluSx1	16.782	11.4794	14.1307	1.46193	0.287411	No	879	ENSG00000174574	AKIRIN1	afterGene	26.5968	18.9706	22.7837	1.402	0.189121	No	0.591463	0.640414	0.615939	-1.08276	0.515104	No
chr1:39472945-39473190:MIRb	chr1	39472945	39473190	MIRb	+	SINE/MIR	MIRb	12.0295	14.332	13.1808	-1.1914	0.753408	No	1215	ENSG00000174574	AKIRIN1	afterGene	45.7023	25.0271	35.3647	1.82611	0.0852675	No	0.536704	0.640414	0.588559	-1.19324	0.102343	No
chr1:39473252-39473398:Charlie23a	chr1	39473252	39473398	Charlie23a	-	DNA/hAT-Charlie	Charlie23a	3.48631	3.29326	3.38979	1.05862	0.938021	No	1522	ENSG00000174574	AKIRIN1	afterGene	0.544596	0.640152	0.592374	-1.17546	0.127035	No	16.5027	9.0087	12.7557	1.83186	0.102343	No
chr1:39580296-39582049:L2c	chr1	39580296	39582049	L2c	-	LINE/L2	L2c	7.27195	2.25179	4.76187	3.2294	0.0800367	No	0	ENSG00000127603	MACF1	Intronic	0.640754	0.643912	0.642333	-1.00493	0.979603	No	7.32314	5.35806	6.3406	1.36675	0.522829	No
chr1:39628744-39629042:AluSc	chr1	39628744	39629042	AluSc	+	SINE/Alu	AluSc	0.984697	0.596286	0.790492	1.65138	0.217679	No	0	ENSG00000127603	MACF1	Intronic	1.21073	1.49115	1.35094	-1.23161	0.612137	No	0.536704	0.679822	0.608263	-1.26666	0.102343	No
chr1:39629043-39629340:MARNA	chr1	39629043	39629340	MARNA	+	DNA/TcMar-Mariner	MARNA	1.19185	0.562515	0.877183	2.11879	0.0595414	No	0	ENSG00000127603	MACF1	Intronic	1.79042	2.94082	2.36562	-1.64254	0.261298	No	0.536704	0.640414	0.588559	-1.19324	0.102343	No
chr1:39948504-39948784:AluJb	chr1	39948504	39948784	AluJb	+	SINE/Alu	AluJb	1.70252	1.42441	1.56347	1.19525	0.828766	No	0	ENSG00000127603	MACF1	Intronic	9.61774	24.4072	17.0124	-2.53772	0.00435575	Yes	0.553941	0.828949	0.691445	-1.49646	0.0731111	No
chr1:39948935-39949282:L2a	chr1	39948935	39949282	L2a	-	LINE/L2	L2a	2.43605	2.98781	2.71193	-1.2265	0.818267	No	0	ENSG00000127603	MACF1	Intronic	0.56036	0.751378	0.655869	-1.34089	0.117399	No	31.9222	71.6862	51.8042	-2.24566	0.00258817	Yes
chr1:39992523-39992643:MER117	chr1	39992523	39992643	MER117	-	DNA/hAT-Charlie	MER117	16.9427	1.03563	8.98918	16.3598	1.55221e-05	Yes	917	ENSG00000183682	BMP8A	afterGene	3.49696	15.8344	9.66567	-4.52803	3.5551e-05	Yes	22.8345	0.941346	11.8879	24.2573	2.81865e-10	Yes
chr1:39993381-39993562:MIR3	chr1	39993381	39993562	MIR3	+	SINE/MIR	MIR3	29.4579	1.35781	15.4078	21.6951	2.71929e-06	Yes	1775	ENSG00000183682	BMP8A	afterGene	24.0631	1.06547	12.5643	22.5845	6.7358e-11	Yes	6.63684	17.0579	11.8474	-2.57019	0.00137902	Yes
chr1:39995260-39995552:L1ME4a	chr1	39995260	39995552	L1ME4a	-	LINE/L1	L1ME4a	13.7226	0.976117	7.34938	14.0584	1.73336e-05	Yes	3654	ENSG00000183682	BMP8A	afterGene	3.46724	9.40568	6.43646	-2.71273	0.0115685	Yes	28.6282	0.886644	14.7574	32.2883	5.51806e-12	Yes
chr1:40013436-40014186:L2c	chr1	40013436	40014186	L2c	-	LINE/L2	L2c	16.2112	3.60475	9.90797	4.49718	0.0986859	No	12303	ENSG00000090621	PABPC4	Intergenic	85.4925	119.726	102.609	-1.40043	0.108419	No	0.583239	0.647195	0.615217	-1.10966	0.385796	No
chr1:40079260-40079868:LTR66	chr1	40079260	40079868	LTR66	-	LTR/ERVL	LTR66	2.38597	0.995177	1.69057	2.39754	0.144187	No	9958	ENSG00000163909	HEYL	Intergenic	7.46571	2.71062	5.08817	2.75424	0.0354069	Yes	0.536704	0.640414	0.588559	-1.19324	0.102343	No
chr1:40089107-40089822:L2a	chr1	40089107	40089822	L2a	-	LINE/L2	L2a	6.11298	5.18302	5.648	1.17942	0.805773	No	4	ENSG00000163909	HEYL	afterGene	15.507	11.4406	13.4738	1.35544	0.398985	No	0.536704	0.640414	0.588559	-1.19324	0.102343	No
chr1:4009469-4010012:MER41D	chr1	4009469	4010012	MER41D	+	LTR/ERV1	MER41D	9.22091	0.569569	4.89524	16.1893	3.94305e-06	Yes	-192613	ENSG00000198912	C1orf174	Intergenic	20.4918	1.05069	10.7713	19.5033	8.10239e-10	Yes	0.536704	0.640414	0.588559	-1.19324	0.102343	No
chr1:40117420-40117732:AluSx1	chr1	40117420	40117732	AluSx1	+	SINE/Alu	AluSx1	16.9664	0.799344	8.88286	21.2254	9.75566e-07	Yes	7062	ENSG00000116981	NT5C1A	Intergenic	0.536393	0.640152	0.588272	-1.19344	0.0952777	No	18.7773	0.9419	9.85959	19.9355	3.12806e-09	Yes
chr1:40117890-40118180:MER102b	chr1	40117890	40118180	MER102b	+	DNA/hAT-Charlie	MER102b	32.6064	1.36927	16.9878	23.813	6.31282e-06	Yes	6614	ENSG00000116981	NT5C1A	Intergenic	0.70638	0.640152	0.673266	1.10346	0.521313	No	41.9167	1.61497	21.7658	25.9551	4.42475e-10	Yes
chr1:40118619-40118744:MER91C	chr1	40118619	40118744	MER91C	+	DNA/hAT-Tip100	MER91C	19.9154	1.19225	10.5538	16.7041	4.3069e-05	Yes	6050	ENSG00000116981	NT5C1A	Intergenic	0.536393	0.640152	0.588272	-1.19344	0.0952777	No	19.7372	0.982096	10.3596	20.097	1.25677e-09	Yes
chr1:40119598-40119756:MER117	chr1	40119598	40119756	MER117	+	DNA/hAT-Charlie	MER117	23.8315	1.044	12.4377	22.8271	4.02651e-06	Yes	5038	ENSG00000116981	NT5C1A	Intergenic	0.544596	0.640152	0.592374	-1.17546	0.127035	No	19.1385	1.32461	10.2316	14.4485	8.23172e-08	Yes
chr1:40119813-40120332:Tigger12c	chr1	40119813	40120332	Tigger12c	-	DNA/TcMar-Tigger	Tigger12c	42.6871	2.44293	22.565	17.4737	4.18863e-05	Yes	4462	ENSG00000116981	NT5C1A	afterGene	36.0004	1.43224	18.7163	25.1356	1.36707e-09	Yes	0.557284	0.665961	0.611622	-1.19501	0.157892	No
chr1:40120999-40121248:Charlie15b	chr1	40120999	40121248	Charlie15b	+	DNA/hAT-Charlie	Charlie15b	9.32398	0.721957	5.02297	12.9149	3.07066e-05	Yes	3546	ENSG00000116981	NT5C1A	afterGene	0.536393	0.640152	0.588272	-1.19344	0.0952777	No	15.1845	0.883188	8.03383	17.1928	1.79687e-08	Yes
chr1:40143797-40144101:AluSc	chr1	40143797	40144101	AluSc	-	SINE/Alu	AluSc	21.1917	3.38093	12.2863	6.26802	0.000993547	Yes	220	ENSG00000116983	HPCAL4	afterGene	46.6707	4.54396	25.6073	10.2709	1.61826e-07	Yes	0.706773	0.642394	0.674584	1.10022	0.537433	No
chr1:4072912-4073334:L1ME5	chr1	4072912	4073334	L1ME5	+	LINE/L1	L1ME5	8.90611	0.505661	4.70588	17.6128	1.04122e-07	Yes	-256056	ENSG00000198912	C1orf174	Intergenic	0.536393	0.640152	0.588272	-1.19344	0.0952777	No	9.33468	0.640414	4.98755	14.576	1.58526e-11	Yes
chr1:4073652-4073934:L1ME5	chr1	4073652	4073934	L1ME5	+	LINE/L1	L1ME5	7.23485	0.464839	3.84984	15.5642	1.68872e-07	Yes	-256796	ENSG00000198912	C1orf174	Intergenic	0.536393	0.646545	0.591469	-1.20536	0.0952777	No	9.96772	0.640414	5.30407	15.5645	1.90704e-11	Yes
chr1:4075899-4076969:L1ME5	chr1	4075899	4076969	L1ME5	+	LINE/L1	L1ME5	28.1469	0.504231	14.3256	55.8215	2.66577e-09	Yes	-259043	ENSG00000198912	C1orf174	Intergenic	1.05231	0.640152	0.84623	1.64384	0.0186193	No	22.0145	0.64212	11.3283	34.284	2.7159e-15	Yes
chr1:40932582-40932877:AluJb	chr1	40932582	40932877	AluJb	-	SINE/Alu	AluJb	1.45192	7.07182	4.26187	-4.87067	0.00733741	Yes	3193	ENSG00000187801	ZFP69B	afterGene	0.536393	0.640152	0.588272	-1.19344	0.0952777	No	3.35733	9.14555	6.25144	-2.72406	0.0153525	Yes
chr1:40933504-40933691:HAL1	chr1	40933504	40933691	HAL1	+	LINE/L1	HAL1	2.32676	4.35192	3.33934	-1.87038	0.408146	No	4115	ENSG00000187801	ZFP69B	afterGene	5.2004	8.34733	6.77386	-1.60513	0.138367	No	0.536704	0.663293	0.599998	-1.23587	0.102343	No
chr1:40933700-40934007:AluSx	chr1	40933700	40934007	AluSx	+	SINE/Alu	AluSx	2.02798	5.59104	3.80951	-2.75695	0.112465	No	4311	ENSG00000187801	ZFP69B	afterGene	4.15202	7.69354	5.92278	-1.85297	0.0952777	No	0.596521	0.659784	0.628152	-1.10605	0.455451	No
chr1:40934161-40934507:THE1D	chr1	40934161	40934507	THE1D	-	LTR/ERVL-MaLR	THE1D	8.91369	16.9718	12.9427	-1.90401	0.126249	No	4772	ENSG00000187801	ZFP69B	afterGene	0.755104	0.806252	0.780678	-1.06774	0.816558	No	18.3681	31.4982	24.9332	-1.71483	0.0592164	No
chr1:40935070-40935372:AluJr	chr1	40935070	40935372	AluJr	+	SINE/Alu	AluJr	3.82774	10.946	7.38688	-2.85966	0.0270007	Yes	5681	ENSG00000187801	ZFP69B	Intergenic	2.92282	11.3377	7.13024	-3.87902	8.03176e-05	Yes	0.605744	0.736383	0.671063	-1.21567	0.239504	No
chr1:40936766-40936988:L1MB2	chr1	40936766	40936988	L1MB2	+	LINE/L1	L1MB2	4.00569	6.28513	5.14541	-1.56905	0.469531	No	-5900	ENSG00000187815	ZFP69	Intergenic	7.32754	18.9596	13.1436	-2.58744	0.00238504	Yes	0.732007	0.786224	0.759115	-1.07407	0.770784	No
chr1:40937419-40938429:LTR5A	chr1	40937419	40938429	LTR5A	+	LTR/ERVK	LTR5A	8.8993	25.9354	17.4174	-2.91432	0.0673575	No	-4459	ENSG00000187815	ZFP69	Intergenic	38.2966	81.6636	59.9801	-2.1324	0.000569635	Yes	0.947774	1.22037	1.08407	-1.28761	0.503133	No
chr1:40938527-40939212:L2a	chr1	40938527	40939212	L2a	+	LINE/L2	L2a	8.91595	8.6113	8.76363	1.03538	0.959191	No	-3676	ENSG00000187815	ZFP69	Intergenic	16.3873	34.7448	25.5661	-2.12022	0.0237712	Yes	0.880023	0.653628	0.766826	1.34637	0.233856	No
chr1:40939338-40940333:L1ME3A	chr1	40939338	40940333	L1ME3A	-	LINE/L1	L1ME3A	4.32897	7.27694	5.80296	-1.68098	0.410068	No	-2555	ENSG00000187815	ZFP69	Intergenic	1.86178	0.995936	1.42886	1.86937	0.128996	No	17.9981	29.8118	23.905	-1.65639	0.102343	No
chr1:41084941-41085212:AluJr4	chr1	41084941	41085212	AluJr4	-	SINE/Alu	AluJr4	8.48357	0.981022	4.7323	8.64768	0.00024245	Yes	1140	ENSG00000117016	RIMS3	afterGene	14.1379	1.49764	7.81775	9.44011	5.18102e-07	Yes	0.536704	0.640414	0.588559	-1.19324	0.102343	No
chr1:41150878-41151457:LTR16B2	chr1	41150878	41151457	LTR16B2|LTR16B2	-	LTR/ERVL	LTR16B2	8.42229	7.29306	7.85768	1.15484	0.832006	No	-5864	ENSG00000066136	NFYC	Intergenic	31.8248	48.7528	40.2888	-1.53191	0.0952777	No	0.583146	0.694917	0.639032	-1.19167	0.2411	No
chr1:41152349-41152623:L2d2	chr1	41152349	41152623	L2d2	+	LINE/L2	L2d2	1.96987	5.77536	3.87262	-2.93185	0.0411678	Yes	-4698	ENSG00000066136	NFYC	Intergenic	0.601762	0.689748	0.645755	-1.14621	0.361463	No	12.459	20.292	16.3755	-1.6287	0.102343	No
chr1:41154694-41154952:MLT1I	chr1	41154694	41154952	MLT1I	-	LTR/ERVL-MaLR	MLT1I	2.63167	2.35572	2.49369	1.11714	0.895679	No	-2369	ENSG00000066136	NFYC	Intergenic	13.2595	14.5812	13.9203	-1.09968	0.764813	No	0.536704	0.640414	0.588559	-1.19324	0.102343	No
chr1:41500299-41502323:L2c	chr1	41500299	41502323	L2c	+	LINE/L2	L2c	4.17936	1.82604	3.0027	2.28876	0.269765	No	0	ENSG00000010803	SCMH1	Intronic	1.25482	2.46095	1.85789	-1.9612	0.0952777	No	8.62845	13.8611	11.2448	-1.60645	0.160281	No
chr1:41630416-41633397:L1MA6	chr1	41630416	41633397	L1MA6	-	LINE/L1	L1MA6	2.12202	2.78888	2.45545	-1.31426	0.679928	No	0	ENSG00000010803	SCMH1	Intronic	3.32004	13.1189	8.21945	-3.95142	0.00479642	Yes	0.544896	0.741112	0.643004	-1.3601	0.102343	No
chr1:41641937-41648034:L1PA4	chr1	41641937	41648034	L1PA4	+	LINE/L1	L1PA4	2.50848	1.56767	2.03808	1.60013	0.57565	No	0	ENSG00000010803	SCMH1	Intronic	0.760675	0.860399	0.810537	-1.1311	0.675962	No	2.86465	4.70343	3.78404	-1.64188	0.292296	No
chr1:42316576-42316918:L2a	chr1	42316576	42316918	L2a	+	LINE/L2	L2a	0.570238	0.875061	0.722649	-1.53455	0.285873	No	0	ENSG00000127124	HIVEP3	Intronic	0.536393	0.640152	0.588272	-1.19344	0.0952777	No	3.087	3.85087	3.46893	-1.24745	0.61081	No
chr1:42316949-42317269:AluSc	chr1	42316949	42317269	AluSc	-	SINE/Alu	AluSc	0.683771	0.581716	0.632744	1.17544	0.66301	No	0	ENSG00000127124	HIVEP3	Intronic	2.01635	1.70439	1.86037	1.18303	0.731186	No	0.536704	0.640414	0.588559	-1.19324	0.102343	No
chr1:42674981-42677641:L1PBb	chr1	42674981	42677641	L1PBb	+	LINE/L1	L1PBb	1.96488	1.48053	1.7227	1.32714	0.702713	No	0	ENSG00000198815	FOXJ3	Intronic	0.536393	0.640152	0.588272	-1.19344	0.0952777	No	1.66226	1.09722	1.37974	1.51497	0.3672	No
chr1:42856008-42857530:L2a	chr1	42856008	42857530	L2a	-	LINE/L2	L2a	3.69946	0.69219	2.19582	5.34457	0.00342009	Yes	0	ENSG00000177181	RIMKLA	Intronic	0.548921	0.659578	0.604249	-1.20159	0.118714	No	5.08963	1.81964	3.45464	2.79705	0.0246497	Yes
chr1:43139686-43140121:L2c	chr1	43139686	43140121	L2c	-	LINE/L2	L2c	5.14573	4.78855	4.96714	1.07459	0.931064	No	0	ENSG00000171960	PPIH	Intronic	1.83066	3.00395	2.4173	-1.64091	0.266823	No	21.6127	46.3802	33.9965	-2.14597	0.0064908	Yes
chr1:43141517-43141706:MIRb	chr1	43141517	43141706	MIRb	+	SINE/MIR	MIRb	30.1819	12.921	21.5514	2.33588	0.0102827	Yes	0	ENSG00000171960	PPIH	Intronic	78.6165	60.1565	69.3865	1.30687	0.203591	No	0.601411	0.671945	0.636678	-1.11728	0.421831	No
chr1:43141859-43142155:AluSg	chr1	43141859	43142155	AluSg	+	SINE/Alu	AluSg	5.31896	2.4133	3.86613	2.20402	0.213041	No	0	ENSG00000171960	PPIH	Intronic	15.0322	28.6983	21.8653	-1.90911	0.0564484	No	0.553941	0.661635	0.607788	-1.19441	0.131915	No
chr1:43160992-43161212:MIRc	chr1	43160992	43161212	MIRc	+	SINE/MIR	MIRc	2.91704	5.94815	4.4326	-2.0391	0.297538	No	0	ENSG00000065978	YBX1	Intronic	8.62979	57.8899	33.2598	-6.70815	1.86622e-09	Yes	0.536704	0.659803	0.598253	-1.22936	0.102343	No
chr1:43186410-43187425:L1ME2	chr1	43186410	43187425	L1ME2	+	LINE/L1	L1ME2	0.826621	2.24686	1.53674	-2.71813	0.099673	No	11340	ENSG00000164007	CLDN19	Intergenic	1.20749	10.7067	5.95708	-8.8669	2.02315e-08	Yes	0.544896	0.640414	0.592655	-1.1753	0.135017	No
chr1:43187906-43188109:L1M4c	chr1	43187906	43188109	L1M4c	+	LINE/L1	L1M4c	0.571107	0.764727	0.667917	-1.33903	0.425342	No	10656	ENSG00000164007	CLDN19	Intergenic	0.849742	2.20488	1.52731	-2.59477	0.0348605	Yes	0.583239	0.640414	0.611826	-1.09803	0.433051	No
chr1:43242760-43243057:AluSc	chr1	43242760	43243057	AluSc	-	SINE/Alu	AluSc	7.34651	15.613	11.4797	-2.12522	0.0925241	No	0	ENSG00000164008	C1orf50	Intronic	0.591128	0.706015	0.648571	-1.19435	0.214133	No	2.89828	7.47101	5.18465	-2.57774	0.0346334	Yes
chr1:43243058-43243401:MLT1F2	chr1	43243058	43243401	MLT1F2	-	LTR/ERVL-MaLR	MLT1F2	13.3579	36.1183	24.7381	-2.70389	0.00412065	Yes	0	ENSG00000164008	C1orf50	Intronic	0.657299	1.03083	0.844067	-1.56829	0.113993	No	14.4691	24.7194	19.5942	-1.70843	0.102343	No
chr1:43243883-43244143:L2c	chr1	43243883	43244143	L2c	-	LINE/L2	L2c	12.0978	34.0887	23.0932	-2.81777	0.00821581	Yes	0	ENSG00000164008	C1orf50	Intronic	0.641691	1.17703	0.90936	-1.83426	0.0409265	No	17.2907	29.1051	23.1979	-1.68329	0.102343	No
chr1:43245469-43245686:MIRb	chr1	43245469	43245686	MIRb	-	SINE/MIR	MIRb	14.5272	29.8143	22.1707	-2.05231	0.0411828	Yes	0	ENSG00000164008	C1orf50	Intronic	0.598853	0.800137	0.699495	-1.33612	0.123771	No	20.4171	32.3232	26.3701	-1.58314	0.102343	No
chr1:43245769-43246014:AluJr	chr1	43245769	43246014	AluJr	-	SINE/Alu	AluJr	5.50868	25.2964	15.4025	-4.5921	0.00105389	Yes	0	ENSG00000164008	C1orf50	Intronic	0.594013	0.732713	0.663363	-1.2335	0.189885	No	9.97961	32.0572	21.0184	-3.21227	2.10027e-05	Yes
chr1:43246281-43246954:L2b	chr1	43246281	43246954	L2b	+	LINE/L2	L2b	50.058	79.8896	64.9738	-1.59594	0.0972442	No	0	ENSG00000164008	C1orf50	Intronic	73.2935	110.564	91.9287	-1.50851	0.034706	No	0.558069	1.18714	0.872603	-2.12722	0.0126692	Yes
chr1:43247252-43247621:L2a	chr1	43247252	43247621	L2a	+	LINE/L2	L2a	26.7483	39.6164	33.1823	-1.48108	0.225075	No	0	ENSG00000164008	C1orf50	Intronic	47.3424	60.5288	53.9356	-1.27853	0.226097	No	0.56344	0.680826	0.622133	-1.20834	0.146137	No
chr1:43270826-43271170:MSTD	chr1	43270826	43271170	MSTD	+	LTR/ERVL-MaLR	MSTD	7.99997	20.9747	14.4874	-2.62185	0.00718288	Yes	1554	ENSG00000177868	CCDC23	afterGene	0.571186	0.691995	0.63159	-1.21151	0.187371	No	8.6731	22.2553	15.4642	-2.56602	0.000438	Yes
chr1:43323394-43325555:HERVH-int	chr1	43323394	43325555	HERVH-int|LTR7C	+	LTR/ERV1	HERVH-int	3.71835	3.88689	3.80262	-1.04533	0.952665	No	5247	ENSG00000164011	ZNF691	Intergenic	16.7084	45.0212	30.8648	-2.69452	0.000140035	Yes	0.621629	0.704078	0.662854	-1.13263	0.435771	No
chr1:43815410-43815694:L2c	chr1	43815410	43815694	L2c	+	LINE/L2	L2c	3.63968	0.828088	2.23388	4.39528	0.0177674	Yes	0	ENSG00000117400	MPL	Intronic	10.236	0.85047	5.54322	12.0357	1.79712e-08	Yes	0.671006	0.68018	0.675593	-1.01367	0.943893	No
chr1:44060543-44060861:L2	chr1	44060543	44060861	L2	-	LINE/L2	L2	3.10789	0.609643	1.85877	5.09789	0.000259028	Yes	0	ENSG00000142949	PTPRF	Intronic	0.536393	0.642131	0.589262	-1.19713	0.0952777	No	2.16131	4.24664	3.20398	-1.96485	0.102343	No
chr1:44061191-44062057:L2	chr1	44061191	44062057	L2	-	LINE/L2	L2	4.63851	1.00422	2.82137	4.61899	0.00946893	Yes	0	ENSG00000142949	PTPRF	Intronic	0.544596	0.64246	0.593528	-1.1797	0.123412	No	5.85313	6.58255	6.21784	-1.12462	0.782947	No
chr1:44077515-44077823:L2	chr1	44077515	44077823	L2	-	LINE/L2	L2	2.11301	1.31854	1.71577	1.60254	0.511095	No	0	ENSG00000142949	PTPRF	Intronic	0.582982	0.641892	0.612437	-1.10105	0.414361	No	4.07249	7.61462	5.84355	-1.86977	0.112965	No
chr1:44405156-44405580:L2	chr1	44405156	44405580	L2	+	LINE/L2	L2	10.3004	6.82146	8.56094	1.51	0.375077	No	2244	ENSG00000117407	ARTN	afterGene	0.937284	1.16994	1.05361	-1.24823	0.569398	No	22.0184	32.4155	27.2169	-1.4722	0.105919	No
chr1:44425064-44425261:MIRc	chr1	44425064	44425261	MIRc	+	SINE/MIR	MIRc	10.0865	2.09838	6.09242	4.80678	0.00387943	Yes	0	ENSG00000117408	IPO13	Intronic	17.3901	10.5135	13.9518	1.65407	0.0952777	No	0.536704	0.659803	0.598253	-1.22936	0.102343	No
chr1:44427860-44428619:L2c	chr1	44427860	44428619	L2c	+	LINE/L2	L2c	14.8712	2.9758	8.9235	4.99738	0.0488885	Yes	0	ENSG00000117408	IPO13	Intronic	29.4916	29.7293	29.6105	-1.00806	0.985843	No	0.583239	0.640414	0.611826	-1.09803	0.433051	No
chr1:44430969-44431090:L2a	chr1	44430969	44431090	L2a	-	LINE/L2	L2a	5.97737	0.926125	3.45175	6.45417	0.00177983	Yes	0	ENSG00000117408	IPO13	Intronic	0.586324	0.647214	0.616769	-1.10385	0.410982	No	15.3747	15.4212	15.398	-1.00302	0.993293	No
chr1:44448126-44449414:L2c	chr1	44448126	44449414	L2c	-	LINE/L2	L2c	5.31535	2.86583	4.09059	1.85473	0.331112	No	0	ENSG00000117411	B4GALT2	Intronic	0.591128	0.739561	0.665344	-1.2511	0.165822	No	16.7013	22.7402	19.7208	-1.36159	0.250507	No
chr1:44453125-44453355:L2a	chr1	44453125	44453355	L2a	+	LINE/L2	L2a	14.8718	6.56664	10.7192	2.26475	0.0322161	Yes	0	ENSG00000117411	B4GALT2	Intronic	14.2245	12.7241	13.4743	1.11792	0.684272	No	0.544896	0.640414	0.592655	-1.1753	0.135017	No
chr1:44453577-44453773:L2a	chr1	44453577	44453773	L2a	+	LINE/L2	L2a	10.0677	7.31417	8.69091	1.37646	0.59063	No	0	ENSG00000117411	B4GALT2	Intronic	21.6596	14.7286	18.1941	1.47059	0.133406	No	0.592274	0.688885	0.640579	-1.16312	0.315065	No
chr1:44454052-44454372:AluSx1	chr1	44454052	44454372	AluSx1	+	SINE/Alu	AluSx1	5.59897	4.34395	4.97146	1.28891	0.615472	No	0	ENSG00000117411	B4GALT2	Intronic	6.91857	8.55008	7.73433	-1.23582	0.475565	No	0.583239	0.640414	0.611826	-1.09803	0.433051	No
chr1:44455012-44455930:MER49	chr1	44455012	44455930	MER49	-	LTR/ERV1	MER49	9.51914	4.36701	6.94307	2.17978	0.231707	No	0	ENSG00000117411	B4GALT2	Intronic	9.37845	7.88517	8.63181	1.18938	0.647002	No	13.5915	18.2463	15.9189	-1.34248	0.281255	No
chr1:44505792-44506095:AluSp	chr1	44505792	44506095	AluSp	+	SINE/Alu	AluSp	12.1709	4.3981	8.28451	2.76731	0.0348141	Yes	-8654	ENSG00000196517	SLC6A9	Intergenic	13.413	4.70949	9.06126	2.84809	0.00826916	Yes	0.641285	0.640414	0.640849	1.00136	0.993293	No
chr1:44689454-44690089:L2	chr1	44689454	44690089	L2	+	LINE/L2	L2	3.52442	3.76758	3.646	-1.06899	0.940156	No	0	ENSG00000117419	ERI3	Intronic	1.5712	0.893286	1.23224	1.7589	0.163837	No	22.7618	47.9266	35.3442	-2.10557	0.0111392	Yes
chr1:44699256-44699874:L2b	chr1	44699256	44699874	L2b	+	LINE/L2	L2b	2.54761	1.19001	1.86881	2.14083	0.217547	No	0	ENSG00000117419	ERI3	Intronic	0.672631	0.661928	0.66728	1.01617	0.925871	No	4.41357	7.41486	5.91422	-1.68001	0.153365	No
chr1:44742121-44743411:L2b	chr1	44742121	44743411	L2b	+	LINE/L2	L2b	4.39451	0.710966	2.55274	6.18104	0.00158971	Yes	0	ENSG00000117419	ERI3	Intronic	0.536393	0.640152	0.588272	-1.19344	0.0952777	No	3.4045	1.36606	2.38528	2.49221	0.0778964	No
chr1:44892117-44892428:AluSx	chr1	44892117	44892428	AluSx	+	SINE/Alu	AluSx	1.12992	0.464519	0.797219	2.43245	0.0135392	Yes	0	ENSG00000187147	RNF220	Intronic	0.999258	0.728509	0.863883	1.37165	0.304581	No	0.536704	0.640414	0.588559	-1.19324	0.102343	No
chr1:44931301-44932877:Tigger1	chr1	44931301	44932877	Tigger1	-	DNA/TcMar-Tigger	Tigger1	5.57994	0.530024	3.05498	10.5277	2.1623e-05	Yes	0	ENSG00000187147	RNF220	Intronic	0.536393	0.640152	0.588272	-1.19344	0.0952777	No	5.23788	1.19318	3.21553	4.38984	0.00267256	Yes
chr1:44935596-44936048:L2a	chr1	44935596	44936048	L2a	-	LINE/L2	L2a	4.6184	0.507965	2.56318	9.09197	4.84361e-05	Yes	0	ENSG00000187147	RNF220	Intronic	0.536393	0.640152	0.588272	-1.19344	0.0952777	No	5.77645	1.13131	3.45388	5.10598	0.00142412	Yes
chr1:44974942-44975277:AluY	chr1	44974942	44975277	AluY	+	SINE/Alu	AluY	1.39135	0.508428	0.94989	2.73657	0.00979015	Yes	0	ENSG00000187147	RNF220	Intronic	2.54119	0.848827	1.69501	2.99376	0.0199361	Yes	0.536704	0.679822	0.608263	-1.26666	0.102343	No
chr1:44975278-44975578:AluSz6	chr1	44975278	44975578	AluSz6	+	SINE/Alu	AluSz6	3.6671	0.464662	2.06588	7.89198	1.53685e-07	Yes	0	ENSG00000187147	RNF220	Intronic	2.43644	0.951861	1.69415	2.55966	0.0807538	No	0.536704	0.640414	0.588559	-1.19324	0.102343	No
chr1:44975646-44975923:AluJb	chr1	44975646	44975923	AluJb	+	SINE/Alu	AluJb	3.89868	0.465156	2.18192	8.38143	2.90293e-07	Yes	0	ENSG00000187147	RNF220	Intronic	1.98642	0.970664	1.47854	2.04645	0.10631	No	0.544896	0.640414	0.592655	-1.1753	0.135017	No
chr1:44976107-44976515:L2c	chr1	44976107	44976515	L2c	+	LINE/L2	L2c	2.34954	0.463966	1.40675	5.06404	0.000288176	Yes	0	ENSG00000187147	RNF220	Intronic	3.53108	0.955963	2.24352	3.69374	0.00831115	Yes	0.544896	0.645479	0.595187	-1.18459	0.12547	No
chr1:44991215-44992927:L2a	chr1	44991215	44992927	L2a	+	LINE/L2	L2a	3.19011	0.508993	1.84955	6.26748	0.000436809	Yes	0	ENSG00000187147	RNF220	Intronic	3.8043	0.937683	2.37099	4.05713	0.00561254	Yes	0.536704	0.642394	0.589549	-1.19693	0.102343	No
chr1:45045433-45045729:AluJb	chr1	45045433	45045729	AluJb	+	SINE/Alu	AluJb	2.83973	0.463847	1.65179	6.12212	2.67659e-06	Yes	0	ENSG00000187147	RNF220	Intronic	1.50039	0.799189	1.14979	1.87739	0.0952777	No	0.536704	0.670152	0.603428	-1.24864	0.102343	No
chr1:45045825-45045942:MIRc	chr1	45045825	45045942	MIRc	-	SINE/MIR	MIRc	1.69633	0.463688	1.08001	3.65835	0.000824884	Yes	0	ENSG00000187147	RNF220	Intronic	0.536393	0.640152	0.588272	-1.19344	0.0952777	No	1.15875	0.81537	0.987059	1.42113	0.379447	No
chr1:45092737-45093042:AluSg	chr1	45092737	45093042	AluSg	+	SINE/Alu	AluSg	2.21255	0.508791	1.36067	4.34864	0.000362141	Yes	0	ENSG00000187147	RNF220	Intronic	2.34694	0.827788	1.58737	2.8352	0.0461753	Yes	0.536704	0.640414	0.588559	-1.19324	0.102343	No
chr1:45093461-45093658:MER91A	chr1	45093461	45093658	MER91A	-	DNA/hAT-Tip100	MER91A	3.3023	0.506942	1.90462	6.51417	0.000229462	Yes	0	ENSG00000187147	RNF220	Intronic	0.536393	0.640152	0.588272	-1.19344	0.0952777	No	3.81298	1.20781	2.5104	3.15693	0.0457476	Yes
chr1:45094594-45095032:MLT1H	chr1	45094594	45095032	MLT1H	-	LTR/ERVL-MaLR	MLT1H	11.7406	0.464976	6.10281	25.25	6.49228e-08	Yes	0	ENSG00000187147	RNF220	Intronic	0.536393	0.640152	0.588272	-1.19344	0.0952777	No	10.9518	1.82396	6.38789	6.00442	0.00201383	Yes
chr1:45096219-45096534:L2b	chr1	45096219	45096534	L2b	-	LINE/L2	L2b	4.28567	0.465217	2.37544	9.21218	0.000223219	Yes	0	ENSG00000187147	RNF220	Intronic	0.553583	0.672461	0.613022	-1.21474	0.117682	No	10.9663	1.82869	6.39751	5.99684	0.00189822	Yes
chr1:45097006-45097247:L2d2	chr1	45097006	45097247	L2d2	-	LINE/L2	L2d2	4.60441	0.464522	2.53446	9.91213	0.000165723	Yes	0	ENSG00000187147	RNF220	Intronic	0.859917	0.640152	0.750035	1.3433	0.0952777	No	8.02416	1.37762	4.70089	5.82465	0.00151539	Yes
chr1:45108125-45108316:L2b	chr1	45108125	45108316	L2b	-	LINE/L2	L2b	7.08732	1.10901	4.09816	6.39065	0.00490884	Yes	0	ENSG00000187147	RNF220	Intronic	0.821892	0.923572	0.872732	-1.12372	0.67569	No	9.7651	9.61866	9.69188	1.01522	0.974292	No
chr1:45142532-45143859:L2	chr1	45142532	45143859	L2	-	LINE/L2	L2	3.64497	1.96911	2.80704	1.85107	0.414578	No	0	ENSG00000198520	C1orf228	Intronic	0.591128	0.656906	0.624017	-1.11128	0.397866	No	9.5002	4.50135	7.00077	2.11052	0.080457	No
chr1:45605147-45605509:AluJr	chr1	45605147	45605509	AluJr	-	SINE/Alu	AluJr	1.48524	0.616234	1.05074	2.41019	0.071544	No	0	ENSG00000162415	ZSWIM5	Intronic	0.736125	1.38059	1.05836	-1.87549	0.106894	No	0.544896	0.703171	0.624033	-1.29047	0.102343	No
chr1:45781646-45786155:HERVH-int	chr1	45781646	45786155	LTR7|HERVH-int|HERVH-int|HERVH-int	+	LTR/ERV1	HERVH-int	3.60197	1.44167	2.52182	2.49848	0.201968	No	-6391	ENSG00000186603	HPDL	Intergenic	0.527287	0.716157	0.621722	-1.35819	0.129468	No	6.29881	4.38227	5.34054	1.43734	0.386405	No
chr1:45861267-45861443:FRAM	chr1	45861267	45861443	FRAM	-	SINE/Alu	FRAM	1.47361	0.463794	0.968701	3.17729	0.000374511	Yes	0	ENSG00000070759	TESK2	Intronic	1.57957	0.755376	1.16747	2.09111	0.0869114	No	0.583239	0.640414	0.611826	-1.09803	0.433051	No
chr1:46079164-46079459:AluJr4	chr1	46079164	46079459	AluJr4	-	SINE/Alu	AluJr4	2.05924	1.65833	1.85878	1.24176	0.795293	No	0	ENSG00000132780	NASP	Intronic	0.548921	0.656127	0.602524	-1.1953	0.121206	No	3.38964	25.5815	14.4856	-7.54697	5.31713e-08	Yes
chr1:46160831-46161130:AluJr	chr1	46160831	46161130	AluJr	-	SINE/Alu	AluJr	18.3081	17.5078	17.9079	1.04571	0.941054	No	0	ENSG00000197429	IPP	Intronic	16.8154	27.2716	22.0435	-1.62182	0.0932589	No	0.65986	0.859827	0.759843	-1.30305	0.260854	No
chr1:46161346-46161640:AluSp	chr1	46161346	46161640	AluSp	-	SINE/Alu	AluSp	14.1868	11.852	13.0194	1.197	0.694785	No	0	ENSG00000197429	IPP	Intronic	6.90213	15.7438	11.323	-2.28101	0.00603468	Yes	0.619879	0.705743	0.662811	-1.13852	0.428717	No
chr1:46475915-46476088:L2c	chr1	46475915	46476088	L2c	-	LINE/L2	L2c	1.20239	1.82224	1.51232	-1.51552	0.583395	No	0	ENSG00000086015	MAST2	Intronic	0.640754	0.688021	0.664387	-1.07377	0.665882	No	4.95083	20.5862	12.7685	-4.15813	0.000448895	Yes
chr1:46601422-46601720:AluSg	chr1	46601422	46601720	AluSg	+	SINE/Alu	AluSg	0.682724	1.35359	1.01816	-1.98263	0.174182	No	0	ENSG00000117461	PIK3R3	Intronic	0.834611	1.33084	1.08272	-1.59456	0.316038	No	0.666417	0.640414	0.653416	1.0406	0.810422	No
chr1:46687115-46687425:AluJb	chr1	46687115	46687425	AluJb	-	SINE/Alu	AluJb	30.3821	2.07549	16.2288	14.6385	6.41731e-06	Yes	183	ENSG00000171357	LURAP1	afterGene	0.536393	0.648005	0.592199	-1.20808	0.0952777	No	17.5218	3.00937	10.2656	5.82244	4.55446e-05	Yes
chr1:46688564-46688889:AluSz	chr1	46688564	46688889	AluSz	-	SINE/Alu	AluSz	21.913	1.12931	11.5212	19.4039	3.62172e-06	Yes	1632	ENSG00000171357	LURAP1	afterGene	0.536393	0.640152	0.588272	-1.19344	0.0952777	No	15.2407	2.03338	8.63705	7.49528	2.42664e-05	Yes
chr1:46688892-46689183:AluJb	chr1	46688892	46689183	AluJb	-	SINE/Alu	AluJb	24.9203	0.849038	12.8847	29.3513	1.91885e-06	Yes	1960	ENSG00000171357	LURAP1	afterGene	0.536393	0.640152	0.588272	-1.19344	0.0952777	No	12.201	1.97585	7.08845	6.17508	1.64242e-05	Yes
chr1:46690450-46690732:AluSz	chr1	46690450	46690732	AluSz	-	SINE/Alu	AluSz	12.0966	0.725534	6.41109	16.6728	8.04403e-06	Yes	3518	ENSG00000171357	LURAP1	afterGene	0.593805	0.689199	0.641502	-1.16065	0.313654	No	10.2741	1.15384	5.71397	8.90427	4.81884e-06	Yes
chr1:46691045-46691105:MIRb	chr1	46691045	46691105	MIRb	-	SINE/MIR	MIRb	9.41108	0.754281	5.08268	12.4769	1.64499e-05	Yes	4113	ENSG00000171357	LURAP1	afterGene	0.553583	0.663954	0.608768	-1.19938	0.127035	No	17.432	1.91408	9.67302	9.10724	8.68527e-06	Yes
chr1:46691213-46691637:MLT1D	chr1	46691213	46691637	MLT1D	-	LTR/ERVL-MaLR	MLT1D	46.0987	0.83453	23.4666	55.2391	1.15793e-08	Yes	4281	ENSG00000171357	LURAP1	afterGene	0.61017	0.864695	0.737432	-1.41714	0.121388	No	49.8273	5.75425	27.7908	8.65921	3.01091e-08	Yes
chr1:46692622-46692915:AluJr4	chr1	46692622	46692915	AluJr4	-	SINE/Alu	AluJr4	23.294	1.37792	12.336	16.9052	5.76304e-06	Yes	5690	ENSG00000171357	LURAP1	Intergenic	0.548921	0.640152	0.594536	-1.1662	0.151277	No	44.6865	3.34806	24.0173	13.347	1.86137e-10	Yes
chr1:46693199-46693605:L1MC5a	chr1	46693199	46693605	L1MC5a	-	LINE/L1	L1MC5a	22.3031	0.821421	11.5623	27.1518	1.59286e-06	Yes	6267	ENSG00000171357	LURAP1	Intergenic	0.56036	0.728471	0.644415	-1.30001	0.111066	No	67.1668	5.11595	36.1414	13.1289	1.75105e-08	Yes
chr1:46693597-46693902:L1MC5	chr1	46693597	46693902	L1MC5	-	LINE/L1	L1MC5	6.48339	0.653523	3.56846	9.92068	0.00118349	Yes	6665	ENSG00000171357	LURAP1	Intergenic	0.638627	0.695301	0.666964	-1.08874	0.599216	No	41.4228	2.03616	21.7295	20.3436	3.0024e-08	Yes
chr1:46773826-46774223:MER74B	chr1	46773826	46774223	MER74B	-	LTR/ERVL	MER74B	1.917	1.41457	1.66579	1.35518	0.696322	No	0	ENSG00000173660	UQCRH	Intronic	0.544596	0.663954	0.604275	-1.21917	0.0952777	No	11.7798	26.171	18.9754	-2.22169	0.01115	Yes
chr1:46880163-46880299:L2d	chr1	46880163	46880299	L2d	-	LINE/L2	L2d	11.456	3.73851	7.59723	3.06431	0.0748288	No	644	ENSG00000117480	FAAH	afterGene	0.544596	0.663104	0.60385	-1.21761	0.100856	No	18.592	14.0335	16.3127	1.32483	0.328036	No
chr1:46880670-46880996:AluSp	chr1	46880670	46880996	AluSp	-	SINE/Alu	AluSp	10.7628	5.81026	8.28653	1.85238	0.20208	No	1151	ENSG00000117480	FAAH	afterGene	0.536393	0.640152	0.588272	-1.19344	0.0952777	No	19.9313	16.2302	18.0808	1.22804	0.506492	No
chr1:46980495-46980607:L2d	chr1	46980495	46980607	L2d	-	LINE/L2	L2d	0.685131	0.465323	0.575227	1.47238	0.0811994	No	598	ENSG00000197587	DMBX1	afterGene	0.536393	0.644251	0.590322	-1.20108	0.0952777	No	0.536704	1.37964	0.95817	-2.57058	0.0159655	Yes
chr1:46981019-46981096:L2c	chr1	46981019	46981096	L2c	+	LINE/L2	L2c	0.570692	0.465166	0.517929	1.22686	0.288057	No	1122	ENSG00000197587	DMBX1	afterGene	0.536393	1.04455	0.790469	-1.94735	0.0833073	No	0.536704	0.640414	0.588559	-1.19324	0.102343	No
chr1:47054727-47055132:L2c	chr1	47054727	47055132	L2c	-	LINE/L2	L2c	3.68772	1.38002	2.53387	2.67223	0.151611	No	0	ENSG00000079277	MKNK1	Intronic	19.8389	6.13727	12.9881	3.23254	0.00259517	Yes	0.536704	0.640414	0.588559	-1.19324	0.102343	No
chr1:47851999-47852464:L1PA16	chr1	47851999	47852464	L1PA16	+	LINE/L1	L1PA16	2.04001	1.70707	1.87354	1.19503	0.825375	No	7489	ENSG00000162368	CMPK1	Intergenic	10.8833	24.0156	17.4494	-2.20666	0.00643328	Yes	0.552053	0.75648	0.654267	-1.3703	0.102343	No
chr1:48661729-48661883:LTR29	chr1	48661729	48661883	LTR29	+	LTR/ERV1	LTR29	38.1885	8.87552	23.532	4.30267	0.166626	No	-26475	ENSG00000117834	SLC5A9	Intergenic	1.55772	0.671949	1.11483	2.31821	0.0166785	Yes	22.4894	0.85509	11.6723	26.3007	2.11592e-10	Yes
chr1:48829476-48835601:L1PA3	chr1	48829476	48835601	L1PA3	-	LINE/L1	L1PA3	1.62189	0.830347	1.22612	1.95327	0.261528	No	0	ENSG00000132122	SPATA6	Intronic	5.49633	4.86423	5.18028	1.12995	0.811877	No	0.678753	0.716308	0.69753	-1.05533	0.770673	No
chr1:48903576-48908979:HERV9N-int	chr1	48903576	48908979	LTR12B|HERV9N-int	+	LTR/ERV1	HERV9N-int	1.49828	0.969701	1.23399	1.5451	0.473874	No	0	ENSG00000132122	SPATA6	Intronic	0.536393	0.654642	0.595518	-1.22045	0.0952777	No	1.79936	0.788655	1.29401	2.28155	0.0775213	No
chr1:48978917-48985928:HERVK9-int	chr1	48978917	48985928	MER9a1|HERVK9-int|MER9a1	-	LTR/ERVK	HERVK9-int	19.8287	2.18276	11.0057	9.08426	0.00061246	Yes	12600	ENSG00000186094	AGBL4	Intergenic	116.472	34.1527	75.3124	3.41033	2.0014e-05	Yes	0.703077	0.700909	0.701993	1.00309	0.990485	No
chr1:49193879-49194610:L1ME3D	chr1	49193879	49194610	L1ME3D	-	LINE/L1	L1ME3D	3.20944	3.66624	3.43784	-1.14233	0.874521	No	0	ENSG00000186094	AGBL4	Intronic	14.6803	31.6688	23.1746	-2.15722	0.00766082	Yes	0.59139	0.70537	0.64838	-1.19273	0.2488	No
chr1:49323407-49324534:L1MB7	chr1	49323407	49324534	L1MB7	+	LINE/L1	L1MB7	23.4645	1.10943	12.287	21.1501	1.2762e-06	Yes	0	ENSG00000186094	AGBL4	Intronic	0.787537	0.829774	0.808656	-1.05363	0.845868	No	56.3096	1.80134	29.0555	31.2598	9.09653e-14	Yes
chr1:49324889-49325256:LTR16C	chr1	49324889	49325256	LTR16C	+	LTR/ERVL	LTR16C	13.7003	0.728875	7.21461	18.7965	1.53859e-06	Yes	0	ENSG00000186094	AGBL4	Intronic	0.582982	0.640152	0.611567	-1.09806	0.428896	No	23.43	1.06564	12.2478	21.9867	6.62138e-12	Yes
chr1:49325901-49327267:L1MEi	chr1	49325901	49327267	L1MEi	+	LINE/L1	L1MEi	23.1624	1.06824	12.1153	21.6827	2.53985e-06	Yes	0	ENSG00000186094	AGBL4	Intronic	0.536393	0.640152	0.588272	-1.19344	0.0952777	No	18.8736	1.32345	10.0985	14.2609	4.86756e-09	Yes
chr1:49329235-49330356:L1ME3Cz	chr1	49329235	49330356	L1ME3Cz	+	LINE/L1	L1ME3Cz	13.8092	0.695158	7.25219	19.8649	1.58086e-06	Yes	0	ENSG00000186094	AGBL4	Intronic	0.544596	0.64246	0.593528	-1.1797	0.123412	No	16.971	1.24796	9.1095	13.599	6.77364e-09	Yes
chr1:49909386-49911512:L1MA4A	chr1	49909386	49911512	L1MA4A	-	LINE/L1	L1MA4A	0.819649	0.463684	0.641667	1.76769	0.0202719	No	0	ENSG00000186094	AGBL4	Intronic	12.0324	0.802886	6.41765	14.9865	3.35677e-09	Yes	0.536704	0.640414	0.588559	-1.19324	0.102343	No
chr1:50584239-50584432:CR1-16_AMi	chr1	50584239	50584432	CR1-16_AMi	+	LINE/CR1	CR1-16_AMi	1.13052	0.556771	0.843644	2.03049	0.0461611	Yes	0	ENSG00000162374	ELAVL4	Intronic	2.66136	2.82732	2.74434	-1.06236	0.909762	No	0.536704	0.642736	0.58972	-1.19756	0.102343	No
chr1:51740447-51740605:MER44A	chr1	51740447	51740605	MER44A	+	DNA/TcMar-Tigger	MER44A	12.8247	3.4688	8.14674	3.69716	0.00973526	Yes	1321	ENSG00000123091	RNF11	afterGene	16.2986	6.09856	11.1986	2.67253	0.00982387	Yes	0.544896	0.700623	0.622759	-1.28579	0.100496	No
chr1:52812637-52813061:L1MC4	chr1	52812637	52813061	L1MC4	-	LINE/L1	L1MC4	20.5803	14.8877	17.734	1.38237	0.471984	No	0	ENSG00000154222	CC2D1B	Intronic	4.58708	13.2386	8.91285	-2.88607	0.0038656	Yes	17.3627	11.3786	14.3707	1.5259	0.1592	No
chr1:52813380-52813840:L1MC4	chr1	52813380	52813840	L1MC4	-	LINE/L1	L1MC4	30.1193	15.8243	22.9718	1.90336	0.0758686	No	0	ENSG00000154222	CC2D1B	Intronic	3.33963	9.84502	6.59232	-2.94794	0.00250392	Yes	27.7165	13.9681	20.8423	1.98428	0.0330931	No
chr1:52904263-52904424:MIRb	chr1	52904263	52904424	MIRb	-	SINE/MIR	MIRb	2.13642	17.5584	9.84743	-8.21864	4.80692e-05	Yes	0	ENSG00000134744	ZCCHC11	Intronic	15.6857	86.2961	50.9909	-5.50159	2.35665e-11	Yes	0.544896	0.640414	0.592655	-1.1753	0.135017	No
chr1:52904460-52904763:AluSx	chr1	52904460	52904763	AluSx	+	SINE/Alu	AluSx	5.70228	22.1564	13.9294	-3.88554	0.00690062	Yes	0	ENSG00000134744	ZCCHC11	Intronic	0.544596	0.642131	0.593363	-1.1791	0.124364	No	11.4214	61.2341	36.3278	-5.36132	1.97771e-10	Yes
chr1:52905261-52905961:L1MB7	chr1	52905261	52905961	L1MB7	+	LINE/L1	L1MB7	7.45731	36.2806	21.8689	-4.8651	0.000583786	Yes	0	ENSG00000134744	ZCCHC11	Intronic	0.591056	0.640152	0.615604	-1.08306	0.510465	No	18.2045	126.351	72.2779	-6.94068	1.0192e-10	Yes
chr1:53150127-53151221:L1MC1	chr1	53150127	53151221	L1MC1	-	LINE/L1	L1MC1	246.965	320.421	283.693	-1.29743	0.396899	No	1288	ENSG00000162377	COA7	afterGene	455.282	376.335	415.809	1.20978	0.19568	No	0.928706	0.941947	0.935327	-1.01426	0.972413	No
chr1:53151250-53151535:AluSg	chr1	53151250	53151535	AluSg	-	SINE/Alu	AluSg	51.3384	63.0736	57.206	-1.22859	0.545968	No	974	ENSG00000162377	COA7	afterGene	36.1784	42.6541	39.4163	-1.17899	0.522935	No	0.673471	0.656303	0.664887	1.02616	0.883883	No
chr1:53151539-53151837:AluSz	chr1	53151539	53151837	AluSz	-	SINE/Alu	AluSz	52.3665	77.8939	65.1302	-1.48747	0.159218	No	672	ENSG00000162377	COA7	afterGene	46.7534	49.7741	48.2637	-1.06461	0.818612	No	0.536704	0.669908	0.603306	-1.24819	0.102343	No
chr1:53152123-53152419:AluY	chr1	53152123	53152419	AluY	-	SINE/Alu	AluY	30.3286	58.6615	44.495	-1.9342	0.0299713	No	90	ENSG00000162377	COA7	afterGene	29.9872	46.7355	38.3614	-1.55851	0.0952777	No	0.583146	0.642736	0.612941	-1.10219	0.415424	No
chr1:53381350-53381920:MLT1E1A	chr1	53381350	53381920	MLT1E1A	+	LTR/ERVL-MaLR	MLT1E1A	7.12034	0.849423	3.98488	8.38256	0.0019476	Yes	0	ENSG00000121310	ECHDC2	Intronic	0.56036	0.640152	0.600256	-1.14239	0.226875	No	22.4611	9.55859	16.0098	2.34983	0.0213309	Yes
chr1:53393649-53394042:L2c	chr1	53393649	53394042	L2c	+	LINE/L2	L2c	8.30296	20.6485	14.4757	-2.48688	0.0308641	Yes	0	ENSG00000116171	SCP2	Intronic	7.00012	15.6519	11.326	-2.23595	0.0349281	Yes	1.3363	0.730875	1.03359	1.82835	0.102343	No
chr1:53712768-53712998:MIRb	chr1	53712768	53712998	MIRb	-	SINE/MIR	MIRb	1.66641	1.45618	1.5613	1.14437	0.875848	No	0	ENSG00000157193	LRP8	Intronic	7.22638	44.0854	25.6559	-6.10062	1.20109e-08	Yes	0.583239	0.647195	0.615217	-1.10966	0.385796	No
chr1:53713312-53713607:L3	chr1	53713312	53713607	L3	-	LINE/CR1	L3	2.52072	2.9538	2.73726	-1.17181	0.856428	No	0	ENSG00000157193	LRP8	Intronic	10.9787	75.9476	43.4631	-6.91774	9.08783e-10	Yes	0.553941	0.839818	0.696879	-1.51608	0.0722262	No
chr1:53714475-53714698:MIRc	chr1	53714475	53714698	MIRc	-	SINE/MIR	MIRc	2.54104	2.01925	2.28015	1.25841	0.796081	No	0	ENSG00000157193	LRP8	Intronic	4.31051	29.2071	16.7588	-6.7758	7.69354e-06	Yes	0.536704	0.667876	0.60229	-1.2444	0.102343	No
chr1:53715312-53715533:L2c	chr1	53715312	53715533	L2c	+	LINE/L2	L2c	1.97166	2.2805	2.12608	-1.15664	0.881475	No	0	ENSG00000157193	LRP8	Intronic	0.591056	0.721292	0.656174	-1.22034	0.222193	No	7.64272	38.5251	23.0839	-5.04075	1.32913e-05	Yes
chr1:53724287-53724762:L1PB3	chr1	53724287	53724762	L1PB3	-	LINE/L1	L1PB3	0.684128	0.894545	0.789336	-1.30757	0.576769	No	0	ENSG00000157193	LRP8	Intronic	2.99517	9.73121	6.36319	-3.24897	0.00261963	Yes	0.583146	0.640414	0.61178	-1.0982	0.433051	No
chr1:53734276-53734975:L2a	chr1	53734276	53734975	L2a	+	LINE/L2	L2a	1.64628	1.46514	1.55571	1.12364	0.882342	No	0	ENSG00000157193	LRP8	Intronic	0.700674	0.730989	0.715832	-1.04327	0.884106	No	1.51335	9.99943	5.75639	-6.60748	3.26171e-05	Yes
chr1:53737597-53737900:L3	chr1	53737597	53737900	L3	-	LINE/CR1	L3	1.3816	2.74105	2.06133	-1.98396	0.403321	No	0	ENSG00000157193	LRP8	Intronic	7.32896	22.0885	14.7087	-3.01387	0.00283827	Yes	0.544896	0.6436	0.594248	-1.18114	0.128511	No
chr1:53803960-53804799:L1ME3E	chr1	53803960	53804799	L1ME3E	+	LINE/L1	L1ME3E	12.3103	1.22154	6.76591	10.0777	0.000181591	Yes	-10219	ENSG00000157193	LRP8	Intergenic	44.7341	7.77424	26.2542	5.75415	3.96702e-06	Yes	0.536704	0.640414	0.588559	-1.19324	0.102343	No
chr1:54494036-54494567:L2b	chr1	54494036	54494567	L2b	+	LINE/L2	L2b	116.209	173.806	145.008	-1.49564	0.184337	No	2781	ENSG00000116209	TMEM59	afterGene	0.958815	0.699059	0.828937	1.37158	0.166692	No	130.869	144.915	137.892	-1.10733	0.700051	No
chr1:54494673-54494849:Charlie19a	chr1	54494673	54494849	Charlie19a	+	DNA/hAT-Charlie	Charlie19a	36.1238	58.3658	47.2448	-1.61572	0.268047	No	2499	ENSG00000116209	TMEM59	afterGene	0.544596	0.640152	0.592374	-1.17546	0.127035	No	28.1572	36.9982	32.5777	-1.31399	0.416529	No
chr1:54495828-54495887:AluJr	chr1	54495828	54495887	AluJr	-	SINE/Alu	AluJr	10.965	20.7727	15.8688	-1.89446	0.168205	No	1461	ENSG00000116209	TMEM59	afterGene	8.628	11.7822	10.2051	-1.36558	0.471696	No	0.536704	0.642736	0.58972	-1.19756	0.102343	No
chr1:54496134-54496264:AluJr	chr1	54496134	54496264	AluJr	-	SINE/Alu	AluJr	31.8891	54.7054	43.2972	-1.71549	0.260824	No	1084	ENSG00000116209	TMEM59	afterGene	15.2873	16.3997	15.8435	-1.07277	0.82999	No	0.544896	0.720019	0.632458	-1.32139	0.102343	No
chr1:54496643-54496928:AluSp	chr1	54496643	54496928	AluSp	+	SINE/Alu	AluSp	41.985	64.5887	53.2868	-1.53838	0.329883	No	420	ENSG00000116209	TMEM59	afterGene	0.536393	0.640152	0.588272	-1.19344	0.0952777	No	16.8443	18.7585	17.8014	-1.11364	0.801666	No
chr1:54565997-54566523:L2b	chr1	54565997	54566523	L2b	-	LINE/L2	L2b	16.0009	12.8519	14.4264	1.24502	0.582397	No	0	ENSG00000116205	TCEANC2	Intronic	0.640754	1.12701	0.883883	-1.75889	0.0658868	No	20.3697	22.5996	21.4847	-1.10947	0.722527	No
chr1:54567642-54568898:ERV3-16A3_I-int	chr1	54567642	54568898	ERV3-16A3_I-int	+	LTR/ERVL	ERV3-16A3_I-int	39.8452	33.5469	36.696	1.18775	0.641425	No	0	ENSG00000116205	TCEANC2	Intronic	39.3253	50.8268	45.0761	-1.29247	0.244516	No	0.593892	0.737464	0.665678	-1.24175	0.188985	No
chr1:54688209-54688551:L2a	chr1	54688209	54688551	L2a	+	LINE/L2	L2a	6.96535	13.1006	10.033	-1.88082	0.265695	No	0	ENSG00000116221	MRPL37	Intronic	10.311	30.8118	20.5614	-2.98826	0.000265724	Yes	0.628118	0.873572	0.750845	-1.39078	0.144222	No
chr1:54690053-54690251:MIR	chr1	54690053	54690251	MIR	-	SINE/MIR	MIR	9.22152	14.1236	11.6725	-1.53159	0.390486	No	0	ENSG00000116221	MRPL37	Intronic	0.596749	0.642131	0.61944	-1.07605	0.550297	No	15.6245	41.6844	28.6545	-2.66788	0.000408245	Yes
chr1:54693248-54693467:AluJb	chr1	54693248	54693467	AluJb	-	SINE/Alu	AluJb	5.13947	4.61629	4.87788	1.11333	0.877959	No	0	ENSG00000157216	SSBP3	Intronic	7.48734	16.559	12.0232	-2.2116	0.0101368	Yes	0.641126	0.753063	0.697095	-1.1746	0.437042	No
chr1:54696186-54697353:L1MB8	chr1	54696186	54697353	L1MB8	-	LINE/L1	L1MB8	9.08292	4.2728	6.67786	2.12575	0.26005	No	0	ENSG00000157216	SSBP3	Intronic	30.8474	73.1673	52.0074	-2.37191	0.0018609	Yes	0.865949	2.33683	1.60139	-2.69858	0.056143	No
chr1:54698261-54700037:SVA_D	chr1	54698261	54700037	SVA_D	+	Retroposon/SVA	SVA_D	1.82906	2.65482	2.24194	-1.45147	0.611276	No	0	ENSG00000157216	SSBP3	Intronic	0.705026	1.71474	1.20988	-2.43216	0.0599837	No	3.72054	16.934	10.3273	-4.5515	0.00022102	Yes
chr1:54701122-54701420:AluSx1	chr1	54701122	54701420	AluSx1	-	SINE/Alu	AluSx1	1.42208	1.99242	1.70725	-1.40106	0.623955	No	0	ENSG00000157216	SSBP3	Intronic	3.00867	6.13651	4.57259	-2.03961	0.0952777	No	0.577076	1.54549	1.06128	-2.67813	0.0165327	Yes
chr1:54852357-54852510:FAM	chr1	54852357	54852510	FAM	-	SINE/Alu	FAM	1.12529	0.652551	0.888921	1.72445	0.193721	No	0	ENSG00000157216	SSBP3	Intronic	0.937748	1.5966	1.26717	-1.70259	0.188308	No	0.536704	0.670152	0.603428	-1.24864	0.102343	No
chr1:55104912-55105138:AluJr	chr1	55104912	55105138	AluJr	+	SINE/Alu	AluJr	2.10853	0.464452	1.28649	4.53983	1.83878e-05	Yes	48	ENSG00000162390	ACOT11	afterGene	8.56196	0.920885	4.74142	9.29753	1.0099e-06	Yes	0.557284	0.640414	0.598849	-1.14917	0.21131	No
chr1:55105456-55105727:L1ME3A	chr1	55105456	55105727	L1ME3A	+	LINE/L1	L1ME3A	3.0515	0.557954	1.80473	5.46909	0.000235478	Yes	592	ENSG00000162390	ACOT11	afterGene	10.9864	1.42538	6.2059	7.70769	9.61054e-06	Yes	0.544896	0.640414	0.592655	-1.1753	0.135017	No
chr1:55108686-55109141:L2b	chr1	55108686	55109141	L2b	-	LINE/L2	L2b	3.97091	0.595219	2.28306	6.67134	0.000412984	Yes	0	ENSG00000271723	MROH7-TTC4	Intronic	0.599068	0.64246	0.620764	-1.07243	0.57092	No	12.3087	2.14528	7.22701	5.73759	0.000332983	Yes
chr1:55177038-55177404:L1ME5	chr1	55177038	55177404	L1ME5	+	LINE/L1	L1ME5	4.08472	0.463512	2.27412	8.81255	1.39071e-05	Yes	0	ENSG00000271723	MROH7-TTC4	Intronic	38.1965	2.2439	20.2202	17.0224	3.52071e-08	Yes	0.553941	0.640414	0.597177	-1.15611	0.188605	No
chr1:55178180-55178388:L2b	chr1	55178180	55178388	L2b	-	LINE/L2	L2b	3.73859	0.465126	2.10186	8.0378	9.00307e-06	Yes	0	ENSG00000271723	MROH7-TTC4	Intronic	0.640754	0.642131	0.641442	-1.00215	0.992611	No	43.4938	2.66697	23.0804	16.3083	3.35476e-08	Yes
chr1:55178394-55178732:MLT1A0	chr1	55178394	55178732	MLT1A0	+	LTR/ERVL-MaLR	MLT1A0	7.84858	0.506144	4.17736	15.5066	1.2762e-06	Yes	0	ENSG00000271723	MROH7-TTC4	Intronic	46.3384	4.30815	25.3233	10.756	3.64875e-08	Yes	0.620446	0.642394	0.63142	-1.03537	0.8017	No
chr1:55513698-55514092:MLT1C2	chr1	55513698	55514092	MLT1C2	-	LTR/ERVL-MaLR	MLT1C2	0.751079	1.15029	0.950687	-1.53152	0.435688	No	0	ENSG00000169174	PCSK9	Intronic	0.536393	0.689748	0.613071	-1.2859	0.0952777	No	0.69981	3.34251	2.02116	-4.77631	0.0036244	Yes
chr1:55514584-55514975:L2b	chr1	55514584	55514975	L2b	-	LINE/L2	L2b	0.74012	1.12859	0.934357	-1.52488	0.392149	No	0	ENSG00000169174	PCSK9	Intronic	0.544596	0.641892	0.593244	-1.17866	0.124364	No	0.866903	2.55085	1.70888	-2.94249	0.0954277	No
chr1:55535815-55536678:L2	chr1	55535815	55536678	L2	-	LINE/L2	L2	3.4906	2.68197	3.08628	1.3015	0.75212	No	0	ENSG00000162402	USP24	Intronic	8.49698	19.4122	13.9546	-2.2846	0.0281396	Yes	0.570246	2.01948	1.29486	-3.54142	0.0126377	Yes
chr1:55553316-55553903:L2b	chr1	55553316	55553903	L2b	-	LINE/L2	L2b	1.61947	1.78011	1.69979	-1.09919	0.918477	No	0	ENSG00000162402	USP24	Intronic	5.58596	12.4796	9.03278	-2.2341	0.0952777	No	0.536704	0.642394	0.589549	-1.19693	0.102343	No
chr1:55578801-55580909:L1PA7	chr1	55578801	55580909	L1PA7	+	LINE/L1	L1PA7	2.71087	1.72354	2.2172	1.57285	0.584781	No	0	ENSG00000162402	USP24	Intronic	0.536393	0.693241	0.614817	-1.29241	0.0952777	No	2.68118	6.50378	4.59248	-2.42571	0.102343	No
chr1:55644623-55645712:L2a	chr1	55644623	55645712	L2a	+	LINE/L2	L2a	1.22777	0.916894	1.07233	1.33905	0.591276	No	0	ENSG00000162402	USP24	Intronic	0.544596	0.660135	0.602366	-1.21216	0.0984091	No	1.68679	1.63379	1.66029	1.03244	0.955058	No
chr1:5621720-5623334:MSTA-int	chr1	5621720	5623334	MSTA|MSTA|MSTA-int	-	LTR/ERVL-MaLR	MSTA-int	9.48875	0.65816	5.07345	14.4171	5.4834e-06	Yes	299538	ENSG00000131697	NPHP4	Intergenic	29.1166	1.80906	15.4628	16.0949	8.96968e-10	Yes	0.536704	0.640414	0.588559	-1.19324	0.102343	No
chr1:56956670-56956961:L1MA4	chr1	56956670	56956961	L1MA4	-	LINE/L1	L1MA4	7.15085	0.91881	4.03483	7.78274	0.000793711	Yes	3459	ENSG00000162407	PPAP2B	afterGene	17.6276	5.31646	11.472	3.31567	0.0345203	Yes	0.724203	0.745109	0.734656	-1.02887	0.910085	No
chr1:56957545-56957714:MER5A1	chr1	56957545	56957714	MER5A1	-	DNA/hAT-Charlie	MER5A1	6.57792	0.962577	3.77025	6.83366	0.00332518	Yes	2706	ENSG00000162407	PPAP2B	afterGene	11.846	3.31359	7.57981	3.57498	0.00973154	Yes	0.583239	0.6436	0.613419	-1.10349	0.410158	No
chr1:56957743-56957920:MIRb	chr1	56957743	56957920	MIRb	-	SINE/MIR	MIRb	7.51137	1.25146	4.38142	6.00208	0.0100547	Yes	2500	ENSG00000162407	PPAP2B	afterGene	11.1208	5.16293	8.14187	2.15398	0.0952777	No	0.536704	0.694165	0.615434	-1.29339	0.102343	No
chr1:56958267-56958382:MLT1D-int	chr1	56958267	56958382	MLT1D-int	+	LTR/ERVL-MaLR	MLT1D-int	3.28681	0.812434	2.04962	4.04564	0.0127648	Yes	2038	ENSG00000162407	PPAP2B	afterGene	0.536393	0.640152	0.588272	-1.19344	0.0952777	No	3.91941	2.40973	3.16457	1.62649	0.273015	No
chr1:56958383-56958689:AluSz	chr1	56958383	56958689	AluSz	-	SINE/Alu	AluSz	3.87979	1.1736	2.5267	3.30588	0.0591541	No	1731	ENSG00000162407	PPAP2B	afterGene	6.47068	3.66017	5.06543	1.76786	0.171682	No	0.704333	0.673171	0.688752	1.04629	0.795263	No
chr1:56959053-56959808:MLT1D-int	chr1	56959053	56959808	MLT1D-int|MLT1D	+	LTR/ERVL-MaLR	MLT1D-int	11.9691	1.86869	6.91888	6.40506	0.00865112	Yes	612	ENSG00000162407	PPAP2B	afterGene	0.544596	0.640152	0.592374	-1.17546	0.127035	No	20.2831	8.73389	14.5085	2.32235	0.0624031	No
chr1:57149393-57150723:L2	chr1	57149393	57150723	L2	-	LINE/L2	L2	2.31495	1.37521	1.84508	1.68334	0.454501	No	0	ENSG00000162409	PRKAA2	Intronic	0.605654	0.691961	0.648808	-1.1425	0.385372	No	5.27523	1.99905	3.63714	2.63887	0.0919608	No
chr1:57469433-57469663:L1ME2	chr1	57469433	57469663	L1ME2	-	LINE/L1	L1ME2	1.30836	2.79215	2.05025	-2.13409	0.246215	No	0	ENSG00000173406	DAB1	Intronic	1.75825	3.86929	2.81377	-2.20065	0.0952777	No	0.536704	0.640414	0.588559	-1.19324	0.102343	No
chr1:57471890-57472268:L2	chr1	57471890	57472268	L2	+	LINE/L2	L2	1.29186	7.87546	4.58366	-6.09621	0.00140817	Yes	0	ENSG00000173406	DAB1	Intronic	0.609832	0.642131	0.625982	-1.05296	0.70383	No	1.23066	3.296	2.26333	-2.67823	0.0764159	No
chr1:57610087-57610390:AluSg	chr1	57610087	57610390	AluSg	+	SINE/Alu	AluSg	0.890728	2.45657	1.67365	-2.75794	0.137867	No	0	ENSG00000173406	DAB1	Intronic	0.536393	0.640152	0.588272	-1.19344	0.0952777	No	1.76834	13.3708	7.56957	-7.56121	8.84786e-07	Yes
chr1:57672642-57672941:AluSp	chr1	57672642	57672941	AluSp	-	SINE/Alu	AluSp	0.684702	0.801122	0.742912	-1.17003	0.756409	No	0	ENSG00000173406	DAB1	Intronic	1.24802	2.518	1.88301	-2.0176	0.10501	No	0.536704	0.696228	0.616466	-1.29723	0.102343	No
chr1:57904632-57905064:MLT1K	chr1	57904632	57905064	MLT1K	+	LTR/ERVL-MaLR	MLT1K	0.571558	0.892953	0.732255	-1.56231	0.263916	No	0	ENSG00000173406	DAB1	Intronic	0.544596	0.642131	0.593363	-1.1791	0.124364	No	1.07304	4.37274	2.72289	-4.07509	0.00103457	Yes
chr1:57906552-57906917:L1PA16	chr1	57906552	57906917	L1PA16	-	LINE/L1	L1PA16	0.684049	0.944533	0.814291	-1.3808	0.504835	No	0	ENSG00000173406	DAB1	Intronic	2.13802	4.93382	3.53592	-2.30766	0.0952777	No	0.536704	0.656303	0.596503	-1.22284	0.102343	No
chr1:57907042-57907325:AluJb	chr1	57907042	57907325	AluJb	-	SINE/Alu	AluJb	0.991488	0.847741	0.919615	1.16957	0.769975	No	0	ENSG00000173406	DAB1	Intronic	1.83584	3.68731	2.76158	-2.00851	0.0952777	No	0.536704	0.666222	0.601463	-1.24132	0.102343	No
chr1:58644503-58645525:L1MB7	chr1	58644503	58645525	L1MB7	-	LINE/L1	L1MB7	0.823276	0.608006	0.715641	1.35406	0.370121	No	0	ENSG00000173406	DAB1	Intronic	2.81101	10.2109	6.51095	-3.63246	0.00167585	Yes	0.536704	0.642394	0.589549	-1.19693	0.102343	No
chr1:58645526-58645839:MER2	chr1	58645526	58645839	MER2	+	DNA/TcMar-Tigger	MER2	0.571321	0.806267	0.688794	-1.41123	0.445149	No	0	ENSG00000173406	DAB1	Intronic	0.536393	0.640152	0.588272	-1.19344	0.0952777	No	2.72028	6.64576	4.68302	-2.44304	0.0763186	No
chr1:58645933-58646266:AluJr	chr1	58645933	58646266	AluJr	-	SINE/Alu	AluJr	0.985232	0.993606	0.989419	-1.0085	0.989545	No	0	ENSG00000173406	DAB1	Intronic	1.41152	2.85033	2.13093	-2.01933	0.0952777	No	0.536704	0.670152	0.603428	-1.24864	0.102343	No
chr1:58646267-58647144:L1MB7	chr1	58646267	58647144	L1MB7	-	LINE/L1	L1MB7	0.818743	1.26852	1.04363	-1.54935	0.439319	No	0	ENSG00000173406	DAB1	Intronic	3.16692	8.98866	6.07779	-2.8383	0.0084663	Yes	0.536704	0.642394	0.589549	-1.19693	0.102343	No
chr1:58647007-58649262:L1M4a2	chr1	58647007	58649262	L1M4a2	-	LINE/L1	L1M4a2	0.572418	1.43068	1.00155	-2.49937	0.050102	No	0	ENSG00000173406	DAB1	Intronic	2.09802	7.93578	5.0169	-3.78251	0.0065366	Yes	0.536704	0.640414	0.588559	-1.19324	0.102343	No
chr1:59013279-59014884:ERV3-16A3_I-int	chr1	59013279	59014884	ERV3-16A3_I-int|ERV3-16A3_I-int	-	LTR/ERVL	ERV3-16A3_I-int	29.5262	2.16642	15.8463	13.6291	1.53234e-05	Yes	-806	ENSG00000162600	OMA1	Intergenic	0.536393	0.656569	0.596481	-1.22404	0.0952777	No	40.4062	3.46877	21.9375	11.6486	2.78512e-07	Yes
chr1:59014903-59015388:LTR15	chr1	59014903	59015388	LTR15	+	LTR/ERV1	LTR15	3.80678	0.806876	2.30683	4.71793	0.0152883	Yes	-2430	ENSG00000162600	OMA1	Intergenic	13.0752	1.30289	7.18904	10.0355	6.14666e-07	Yes	0.536704	0.659803	0.598253	-1.22936	0.102343	No
chr1:60251085-60253344:THE1B-int	chr1	60251085	60253344	THE1B|THE1B-int|THE1B	-	LTR/ERVL-MaLR	THE1B-int	3.84742	0.665038	2.25623	5.78526	0.000640749	Yes	17739	ENSG00000172456	FGGY	Intergenic	6.61522	0.969803	3.79251	6.8212	8.40523e-06	Yes	1.70266	2.55686	2.12976	-1.50168	0.399235	No
chr1:60354050-60356325:THE1B-int	chr1	60354050	60356325	THE1B|THE1B-int|THE1B	-	LTR/ERVL-MaLR	THE1B-int	6.63368	1.47309	4.05339	4.50324	0.0088893	Yes	2656	ENSG00000134716	CYP2J2	afterGene	10.6794	1.98881	6.33411	5.36974	0.000606771	Yes	0.549355	0.642394	0.595875	-1.16936	0.15203	No
chr1:61122371-61122757:MLT1B	chr1	61122371	61122757	MLT1B	-	LTR/ERVL-MaLR	MLT1B	0.974189	6.01329	3.49374	-6.17261	0.00173945	Yes	-208175	ENSG00000162599	NFIA	Intergenic	2.61621	46.9475	24.7819	-17.9449	2.6544e-13	Yes	0.536704	0.642394	0.589549	-1.19693	0.102343	No
chr1:61345761-61347161:L1M6	chr1	61345761	61347161	L1M6	+	LINE/L1	L1M6	0.570219	3.90592	2.23807	-6.84985	0.00278394	Yes	0	ENSG00000162599	NFIA	Intronic	1.74664	46.6519	24.1993	-26.7095	5.28586e-11	Yes	0.536704	1.29466	0.91568	-2.41224	0.00244874	Yes
chr1:61347227-61347461:L1M6	chr1	61347227	61347461	L1M6	+	LINE/L1	L1M6	0.571746	0.977959	0.774852	-1.71048	0.214908	No	0	ENSG00000162599	NFIA	Intronic	0.640436	6.41828	3.52936	-10.0217	0.000118959	Yes	0.536704	0.758271	0.647487	-1.41283	0.102343	No
chr1:61347501-61347846:L1M6	chr1	61347501	61347846	L1M6	+	LINE/L1	L1M6	0.57024	1.1533	0.86177	-2.02248	0.213994	No	0	ENSG00000162599	NFIA	Intronic	0.849671	8.63315	4.74141	-10.1606	0.000185183	Yes	0.544896	0.74748	0.646188	-1.37178	0.102343	No
chr1:61583574-61583886:AluSx1	chr1	61583574	61583886	AluSx1	+	SINE/Alu	AluSx1	1.47466	0.867867	1.17126	1.69917	0.247743	No	0	ENSG00000162599	NFIA	Intronic	2.28442	4.47306	3.37874	-1.95807	0.112562	No	0.536704	0.685543	0.611123	-1.27732	0.102343	No
chr1:6191167-6191403:LTR79	chr1	6191167	6191403	LTR79	+	LTR/ERVL	LTR79	3.81141	0.62308	2.21725	6.11706	0.00207499	Yes	0	ENSG00000116254	CHD5	Intronic	0.544596	0.661569	0.603083	-1.21479	0.0984175	No	15.2026	3.19635	9.19945	4.75622	0.00143093	Yes
chr1:6192294-6192934:L1MEi	chr1	6192294	6192934	L1MEi	-	LINE/L1	L1MEi	2.9613	0.653278	1.80729	4.53299	0.00734244	Yes	0	ENSG00000116254	CHD5	Intronic	17.0044	3.53734	10.2709	4.80712	0.00147342	Yes	0.553941	0.728891	0.641416	-1.31583	0.102343	No
chr1:62147474-62147656:MIR3	chr1	62147474	62147656	MIR3	+	SINE/MIR	MIR3	18.9143	22.5176	20.7159	-1.19051	0.676035	No	0	ENSG00000162604	TM2D1	Intronic	0.553583	0.640152	0.596867	-1.15638	0.179605	No	48.8385	83.5697	66.2041	-1.71114	0.0225715	No
chr1:62148291-62148594:AluSz6	chr1	62148291	62148594	AluSz6	+	SINE/Alu	AluSz6	21.8967	19.1271	20.5119	1.1448	0.740723	No	0	ENSG00000162604	TM2D1	Intronic	0.544596	0.640152	0.592374	-1.17546	0.127035	No	14.643	48.7062	31.6746	-3.32626	1.54399e-05	Yes
chr1:62701884-62702034:MER5A1	chr1	62701884	62702034	MER5A1	+	DNA/hAT-Charlie	MER5A1	3.42691	1.27146	2.34918	2.69526	0.165011	No	618	ENSG00000132854	KANK4	afterGene	0.544596	0.64246	0.593528	-1.1797	0.123412	No	4.21521	3.64197	3.92859	1.1574	0.756813	No
chr1:6277225-6277780:L2a	chr1	6277225	6277780	L2a	+	LINE/L2	L2a	3.61659	1.38435	2.50047	2.61249	0.214168	No	0	ENSG00000158286	RNF207	Intronic	14.3218	4.52251	9.42215	3.16678	0.0204251	Yes	0.544896	0.640414	0.592655	-1.1753	0.135017	No
chr1:62948308-62948681:L3	chr1	62948308	62948681	L3	-	LINE/CR1	L3	1.26807	1.02074	1.1444	1.2423	0.72472	No	0	ENSG00000116641	DOCK7	Intronic	6.63172	14.4994	10.5655	-2.18637	0.0269345	Yes	0.536704	0.68956	0.613132	-1.28481	0.102343	No
chr1:6311868-6312020:AluJb	chr1	6311868	6312020	AluJb	-	SINE/Alu	AluJb	1.41025	13.4356	7.42294	-9.52716	1.88756e-05	Yes	0	ENSG00000158292	GPR153	Intronic	2.06794	16.6891	9.3785	-8.07039	3.23171e-09	Yes	0.536704	0.640414	0.588559	-1.19324	0.102343	No
chr1:6312224-6312355:MIR	chr1	6312224	6312355	MIR	+	SINE/MIR	MIR	6.90235	20.3084	13.6054	-2.94224	0.00440264	Yes	0	ENSG00000158292	GPR153	Intronic	0.536393	0.694517	0.615455	-1.29479	0.0952777	No	4.64079	27.9312	16.286	-6.01863	1.88917e-07	Yes
chr1:6313170-6313489:AluSq2	chr1	6313170	6313489	AluSq2	+	SINE/Alu	AluSq2	14.6568	35.465	25.0609	-2.4197	0.0122275	Yes	0	ENSG00000158292	GPR153	Intronic	0.536393	0.644514	0.590453	-1.20157	0.0952777	No	14.0343	42.499	28.2666	-3.02823	1.29925e-05	Yes
chr1:6313534-6313715:MIRb	chr1	6313534	6313715	MIRb	+	SINE/MIR	MIRb	14.2879	31.9516	23.1197	-2.23627	0.0155974	Yes	0	ENSG00000158292	GPR153	Intronic	0.536393	0.640152	0.588272	-1.19344	0.0952777	No	11.1785	29.4704	20.3245	-2.63634	0.000368026	Yes
chr1:63218928-63228332:HERV9NC-int	chr1	63218928	63228332	LTR12C|HERV9NC-int|HERV9NC-int|LTR12C	+	LTR/ERV1	HERV9NC-int	1.78804	1.74773	1.76789	1.02307	0.976497	No	-21475	ENSG00000125703	ATG4C	Intergenic	3.49381	10.1291	6.81146	-2.89915	0.0031205	Yes	0.544896	0.971285	0.75809	-1.78251	0.0123372	No
chr1:6328027-6328321:L1MB8	chr1	6328027	6328321	L1MB8	+	LINE/L1	L1MB8	0.944417	0.743835	0.844126	1.26966	0.671445	No	0	ENSG00000097021	ACOT7	Intronic	0.536393	0.659578	0.597985	-1.22965	0.0952777	No	1.61909	3.67185	2.64547	-2.26786	0.0849974	No
chr1:63890778-63892153:L2a	chr1	63890778	63892153	L2a	-	LINE/L2	L2a	6.89783	3.23285	5.06534	2.13367	0.3824	No	0	ENSG00000088035	ALG6	Intronic	0.698614	1.86784	1.28323	-2.67364	0.031326	Yes	17.9573	46.1387	32.048	-2.56935	0.00678143	Yes
chr1:64002036-64002351:AluSz	chr1	64002036	64002351	AluSz	-	SINE/Alu	AluSz	21.2039	21.5411	21.3725	-1.0159	0.971098	No	0	ENSG00000142856	ITGB3BP	Intronic	0.78143	0.713571	0.747501	1.0951	0.658431	No	18.2778	22.4259	20.3518	-1.22695	0.470356	No
chr1:64048576-64049945:Tigger2	chr1	64048576	64049945	Tigger2	+	DNA/TcMar-Tigger	Tigger2	3.06779	14.9134	8.99059	-4.86128	0.000680746	Yes	0	ENSG00000142856	ITGB3BP	Intronic	13.7397	30.7853	22.2625	-2.2406	0.00339234	Yes	0.897492	0.761182	0.829337	1.17908	0.497487	No
chr1:65071831-65073559:L2a	chr1	65071831	65073559	L2a	-	LINE/L2	L2a	1.07357	0.69243	0.882998	1.55043	0.329084	No	0	ENSG00000158966	CACHD1	Intronic	0.536393	0.640152	0.588272	-1.19344	0.0952777	No	1.05495	1.88729	1.47112	-1.78899	0.164931	No
chr1:6528762-6528950:MER117	chr1	6528762	6528950	MER117	-	DNA/hAT-Charlie	MER117	10.2138	6.67062	8.44222	1.53116	0.459915	No	0	ENSG00000171680	PLEKHG5	Intronic	14.8482	38.1549	26.5016	-2.56966	0.000262672	Yes	0.549355	0.640414	0.594885	-1.16576	0.160281	No
chr1:65517659-65517917:AluJo	chr1	65517659	65517917	AluJo	-	SINE/Alu	AluJo	5.88774	1.95789	3.92282	3.00718	0.128708	No	-85473	ENSG00000162434	JAK1	Intergenic	10.089	10.8897	10.4894	-1.07936	0.831947	No	0.536704	0.640414	0.588559	-1.19324	0.102343	No
chr1:65518079-65518213:AluSx	chr1	65518079	65518213	AluSx	+	SINE/Alu	AluSx	3.57011	1.15354	2.36183	3.0949	0.104207	No	-85893	ENSG00000162434	JAK1	Intergenic	0.536393	0.640152	0.588272	-1.19344	0.0952777	No	7.2858	6.36406	6.82493	1.14484	0.721771	No
chr1:65518747-65519050:AluSx	chr1	65518747	65519050	AluSx	+	SINE/Alu	AluSx	2.96365	1.3043	2.13397	2.27222	0.253438	No	-86561	ENSG00000162434	JAK1	Intergenic	0.536393	0.640152	0.588272	-1.19344	0.0952777	No	6.02241	9.17944	7.60093	-1.52421	0.177818	No
chr1:65519260-65519501:AluJb	chr1	65519260	65519501	AluJb	+	SINE/Alu	AluJb	3.94071	1.86454	2.90263	2.1135	0.341877	No	-87074	ENSG00000162434	JAK1	Intergenic	0.544596	0.640152	0.592374	-1.17546	0.127035	No	5.42695	8.29479	6.86087	-1.52844	0.223247	No
chr1:65520688-65521239:L1MB3	chr1	65520688	65521239	L1MB3	-	LINE/L1	L1MB3	7.07967	2.26002	4.66984	3.13257	0.168262	No	-88502	ENSG00000162434	JAK1	Intergenic	24.0581	32.2457	28.1519	-1.34032	0.268402	No	0.560354	0.753603	0.656979	-1.34487	0.102343	No
chr1:65720839-65721311:L2c	chr1	65720839	65721311	L2c	-	LINE/L2	L2c	11.3186	22.1311	16.7249	-1.95528	0.162077	No	0	ENSG00000116675	DNAJC6	Intronic	0.631143	0.661928	0.646535	-1.04878	0.740664	No	22.6386	23.8193	23.2289	-1.05215	0.890528	No
chr1:65721315-65721500:L2b	chr1	65721315	65721500	L2b	+	LINE/L2	L2b	11.2732	8.99456	10.1339	1.25334	0.702932	No	0	ENSG00000116675	DNAJC6	Intronic	12.0283	12.3431	12.1857	-1.02617	0.950939	No	0.536704	0.642394	0.589549	-1.19693	0.102343	No
chr1:65722028-65722328:AluSz	chr1	65722028	65722328	AluSz	+	SINE/Alu	AluSz	5.17073	12.1253	8.64804	-2.34499	0.0995566	No	0	ENSG00000116675	DNAJC6	Intronic	2.97251	6.90674	4.93962	-2.32354	0.093285	No	0.536704	0.65784	0.597272	-1.2257	0.102343	No
chr1:65722535-65722827:L1PA10	chr1	65722535	65722827	L1PA10	-	LINE/L1	L1PA10	3.38813	9.14854	6.26834	-2.70017	0.0573121	No	0	ENSG00000116675	DNAJC6	Intronic	0.544596	0.700294	0.622445	-1.2859	0.0952777	No	2.14017	5.35373	3.74695	-2.50154	0.0665282	No
chr1:65723040-65723258:MIRc	chr1	65723040	65723258	MIRc	-	SINE/MIR	MIRc	3.39947	11.8848	7.64216	-3.49609	0.00639276	Yes	0	ENSG00000116675	DNAJC6	Intronic	0.536393	0.849423	0.692908	-1.58358	0.030848	No	3.60185	8.7835	6.19267	-2.43861	0.0540285	No
chr1:65727465-65727719:L1MA2	chr1	65727465	65727719	L1MA2	+	LINE/L1	L1MA2	2.30663	6.48765	4.39714	-2.81262	0.0347424	Yes	0	ENSG00000116675	DNAJC6	Intronic	7.10547	10.1219	8.61368	-1.42452	0.328098	No	0.544896	0.725397	0.635147	-1.33126	0.0991224	No
chr1:65891577-65892399:L2a	chr1	65891577	65892399	L2a	-	LINE/L2	L2a	3.49464	2.52138	3.00801	1.386	0.698189	No	0	ENSG00000116678	LEPR	Intronic	0.642447	1.01439	0.828419	-1.57895	0.0952777	No	13.7288	33.6665	23.6977	-2.45224	0.0188202	Yes
chr1:6606469-6607532:L2	chr1	6606469	6607532	L2	+	LINE/L2	L2	3.9392	2.24953	3.09437	1.75112	0.519531	No	0	ENSG00000162408	NOL9	Intronic	0.536393	0.661593	0.598993	-1.23341	0.0952777	No	5.21422	8.81784	7.01603	-1.69112	0.160842	No
chr1:66602104-66602407:AluSx1	chr1	66602104	66602407	AluSx1	+	SINE/Alu	AluSx1	0.785129	0.557805	0.671467	1.40753	0.36404	No	0	ENSG00000184588	PDE4B	Intronic	1.87978	0.996343	1.43806	1.88668	0.140399	No	0.536704	0.640414	0.588559	-1.19324	0.102343	No
chr1:66602457-66602895:L2d2	chr1	66602457	66602895	L2d2	-	LINE/L2	L2d2	1.68918	0.636461	1.16282	2.65402	0.0478291	Yes	0	ENSG00000184588	PDE4B	Intronic	0.536393	0.661928	0.59916	-1.23404	0.0952777	No	4.94536	1.48187	3.21362	3.33723	0.0231176	Yes
chr1:66734071-66734378:AluSx4	chr1	66734071	66734378	AluSx4	+	SINE/Alu	AluSx4	1.172	0.635593	0.903797	1.84395	0.138199	No	0	ENSG00000184588	PDE4B	Intronic	1.85443	2.0445	1.94947	-1.10249	0.843544	No	0.536704	0.679822	0.608263	-1.26666	0.102343	No
chr1:66808111-66808435:AluSz	chr1	66808111	66808435	AluSz	+	SINE/Alu	AluSz	0.985805	0.554509	0.770157	1.7778	0.140697	No	0	ENSG00000184588	PDE4B	Intronic	2.39994	2.24046	2.3202	1.07118	0.88864	No	0.536704	0.670152	0.603428	-1.24864	0.102343	No
chr1:67096208-67096516:AluSq2	chr1	67096208	67096516	AluSq2	+	SINE/Alu	AluSq2	4.54082	1.82214	3.18148	2.49203	0.15961	No	0	ENSG00000118473	SGIP1	Intronic	15.0048	12.8616	13.9332	1.16663	0.70976	No	0.536704	0.640414	0.588559	-1.19324	0.102343	No
chr1:67124519-67124968:L2d2	chr1	67124519	67124968	L2d2	-	LINE/L2	L2d2	5.26492	2.71568	3.9903	1.93871	0.256248	No	0	ENSG00000118473	SGIP1	Intronic	0.677198	0.799283	0.738241	-1.18028	0.413184	No	37.6453	23.7735	30.7094	1.5835	0.158808	No
chr1:67125311-67125625:AluJr	chr1	67125311	67125625	AluJr	+	SINE/Alu	AluJr	4.34956	1.42745	2.8885	3.04708	0.0744204	No	0	ENSG00000118473	SGIP1	Intronic	37.3574	20.8224	29.0899	1.7941	0.0952777	No	0.646199	0.82595	0.736075	-1.27817	0.308043	No
chr1:67237811-67238230:MSTB	chr1	67237811	67238230	MSTB	-	LTR/ERVL-MaLR	MSTB	1.73833	0.555762	1.14705	3.12783	0.014868	Yes	0	ENSG00000152760	TCTEX1D1	Intronic	0.536393	0.640152	0.588272	-1.19344	0.0952777	No	2.95531	1.1487	2.05201	2.57274	0.100896	No
chr1:67240186-67240596:LTR33	chr1	67240186	67240596	LTR33	+	LTR/ERVL	LTR33	1.23811	0.465002	0.851555	2.66259	0.0114083	Yes	0	ENSG00000152760	TCTEX1D1	Intronic	5.266	1.47465	3.37032	3.57102	0.00850869	Yes	0.536704	0.640414	0.588559	-1.19324	0.102343	No
chr1:67241293-67241555:L2b	chr1	67241293	67241555	L2b	-	LINE/L2	L2b	1.7697	0.508078	1.13889	3.48313	0.00529208	Yes	0	ENSG00000152760	TCTEX1D1	Intronic	0.586324	0.643041	0.614683	-1.09673	0.438451	No	11.2017	2.46288	6.83227	4.54819	0.000982136	Yes
chr1:67388317-67388639:L2a	chr1	67388317	67388639	L2a	-	LINE/L2	L2a	1.9655	12.6134	7.28947	-6.41743	0.000918416	Yes	0	ENSG00000152763	WDR78	Intronic	7.86464	34.842	21.3533	-4.43021	5.86773e-07	Yes	0.536704	0.68956	0.613132	-1.28481	0.102343	No
chr1:67388782-67389108:Tigger3b	chr1	67388782	67389108	Tigger3b	+	DNA/TcMar-Tigger	Tigger3b	1.92965	22.5627	12.2462	-11.6926	7.8402e-05	Yes	0	ENSG00000152763	WDR78	Intronic	0.544596	0.640152	0.592374	-1.17546	0.127035	No	7.22602	50.0608	28.6434	-6.92785	2.85873e-11	Yes
chr1:67389126-67389396:L2a	chr1	67389126	67389396	L2a	-	LINE/L2	L2a	5.51452	22.7626	14.1386	-4.12776	0.00236565	Yes	0	ENSG00000152763	WDR78	Intronic	9.88476	51.1892	30.537	-5.1786	2.45655e-09	Yes	0.536704	0.640414	0.588559	-1.19324	0.102343	No
[truncated: 17,539 more rows]

## Sheet: CB_DE_A_vs_EP_TE
TE_ID	chr	start	end	repName	strand	class.fam	unMerged.repName	mean.A.BS	mean.EP.BS	mean.both.BS	foldChange.BS	padj.BS	diffExpr.BS	dist2gene.BS	gene.ens.BS	gene.name.BS	TE.Position	mean.A.CD	mean.EP.CD	mean.both.CD	foldChange.CD	padj.CD	diffExpr.CD	mean.A.oppS	mean.EP.oppS	mean.both.CD.oppS	foldChange.oppS	padj.oppS	diffExpr.oppS
[truncated: 19,099 more rows]
