# Supplementary material for: Transposable elements and their KZFP controllers are drivers of transcriptional innovation in the developing human brain
Source: HighWire-hosted journal article supplement (doi:10.1101/gr.275133.120), 2021-08-16
Supplement: Supplemental_Table_S7.xlsx [file Supplemental_Table_S7.xlsx]

## Sheet: Legend
Supplemental Table S7 - Unique TE integrant differential expression analysis between adult (stage 11) and early prenatal (stages 2A to 3B) from Brainspan (BS) for all regions excluding DFC and CB (see Supplemental Table S7). TE distance to nearest gene is also shown.

## Sheet: cpm_Amygdala.xls
chr	start	end	repName	strand	class.fam	unMerged	mean.A	mean.EP	foldChange	padj	diffExpr	dist2gene	gene.ens	gene.name
chr1	1364747	1365048	L1MEd	-	LINE/L1	L1MEd	479.657	0.612743	782.803	1.78314e-16	Yes	1581	ENSG00000205116	TMEM88B
chr1	1365248	1365537	AluJb	-	SINE/Alu	AluJb	443.918	0.649775	683.188	1.78314e-16	Yes	2082	ENSG00000205116	TMEM88B
chrY	21153222	21153521	AluSx1	+	SINE/Alu	AluSx1	50.9476	2692.12	-52.8409	1.78314e-16	Yes	-162675	ENSG00000169953	HSFY2
chr1	1364582	1364740	AluSx4	+	SINE/Alu	AluSx4	186.017	0.391174	475.534	1.13425e-15	Yes	1416	ENSG00000205116	TMEM88B
chr1	1364099	1364399	AluYk2	+	SINE/Alu	AluYk2	305.755	0.754601	405.188	2.58863e-15	Yes	933	ENSG00000205116	TMEM88B
chr1	1364400	1364578	AluSq2	+	SINE/Alu	AluSq2	149.253	0.391176	381.548	2.81092e-15	Yes	1234	ENSG00000205116	TMEM88B
chr9	38407647	38407874	MIRc	+	SINE/MIR	MIRc	23.5874	1015.75	-43.0631	8.81866e-14	Yes	1118	ENSG00000137142	IGFBPL1
chr9	38408129	38408448	AluJb	+	SINE/Alu	AluJb	11.541	703.046	-60.9171	1.53457e-13	Yes	544	ENSG00000137142	IGFBPL1
chr9	38408687	38408832	MIR3	-	SINE/MIR	MIR3	13.8977	739.066	-53.179	8.17037e-13	Yes	160	ENSG00000137142	IGFBPL1
chr9	38407283	38407429	MIR3	-	SINE/MIR	MIR3	16.0098	784.148	-48.9792	8.80255e-13	Yes	1563	ENSG00000137142	IGFBPL1
chr7	124382092	124382785	L1ME1	+	LINE/L1	L1ME1	70.9205	0.432863	163.84	1.40796e-12	Yes	3267	ENSG00000170775	GPR37
chr19	40885810	40885973	AluJr	-	SINE/Alu	AluJr	80.478	0.528375	152.312	4.41822e-12	Yes	0	ENSG00000105223	PLD3
chr18	48322029	48322332	AluSx1	+	SINE/Alu	AluSx1	168.215	0.918919	183.058	4.93944e-12	Yes	2243	ENSG00000134042	MRO
chr6	149566070	149566254	MIR	-	SINE/MIR	MIR	96.1199	0.43305	221.96	4.93944e-12	Yes	0	ENSG00000055208	TAB2
chr11	63339842	63340185	MSTC	+	LTR/ERVL-MaLR	MSTC	214.879	1.82859	117.511	5.94671e-12	Yes	483	ENSG00000176485	PLA2G16
chr6	149565703	149566031	AluSz	+	SINE/Alu	AluSz	73.6945	0.391175	188.393	5.94671e-12	Yes	0	ENSG00000055208	TAB2
chr1	168050099	168050400	AluSp	-	SINE/Alu	AluSp	5.26766	130.443	-24.763	6.40251e-12	Yes	3598	ENSG00000143147	GPR161
chr3	42736565	42738304	L2	+	LINE/L2	L2	227.426	0.620713	366.395	6.40251e-12	Yes	0	ENSG00000010282	HHATL
chr18	51728435	51728715	AluSx1	+	SINE/Alu	AluSx1	0.618533	43.1055	-69.6899	7.10771e-12	Yes	0	ENSG00000134046	MBD2
chr11	67190516	67190760	L2c	+	LINE/L2	L2c	227.319	0.990077	229.597	1.70533e-11	Yes	0	ENSG00000172508	CARNS1
chr6	149565384	149565680	L2b	-	LINE/L2	L2b	90.0696	0.391169	230.258	1.77302e-11	Yes	0	ENSG00000055208	TAB2
chr11	63337397	63337863	L1ME3F	-	LINE/L1	L1ME3F	396.915	4.99848	79.4072	1.84294e-11	Yes	2805	ENSG00000176485	PLA2G16
chr18	48321705	48321761	L1ME4a	-	LINE/L1	L1ME4a	85.9477	0.677645	126.833	2.84509e-11	Yes	2814	ENSG00000134042	MRO
chr18	48322685	48322785	L2d2	-	LINE/L2	L2d2	50.8392	0.479828	105.953	3.03847e-11	Yes	1790	ENSG00000134042	MRO
chr11	63338941	63339245	AluSx	+	SINE/Alu	AluSx	128.795	1.50969	85.3117	4.04568e-11	Yes	1423	ENSG00000176485	PLA2G16
chr18	51727603	51727707	L2	+	LINE/L2	L2	0.533395	27.2931	-51.1686	5.90292e-11	Yes	0	ENSG00000134046	MBD2
chr5	111059881	111062348	Charlie2a	-	DNA/hAT-Charlie	Charlie2a	7.5581	165.276	-21.8674	8.53011e-11	Yes	0	ENSG00000134986	NREP
chr7	124382812	124383319	L2a	+	LINE/L2	L2a	77.674	0.845773	91.8379	8.53011e-11	Yes	2733	ENSG00000170775	GPR37
chr18	48323397	48323882	MLT1G1	-	LTR/ERVL-MaLR	MLT1G1	208.275	1.69508	122.87	1.12156e-10	Yes	693	ENSG00000134042	MRO
chr18	48323179	48323281	L2a	-	LINE/L2	L2a	59.0119	0.60423	97.6646	1.36853e-10	Yes	1294	ENSG00000134042	MRO
chr19	35806874	35807355	MER1A	+	DNA/hAT-Charlie	MER1A	33.1485	0.391279	84.7183	1.49077e-10	Yes	2168	ENSG00000105695	MAG
chr20	1920757	1920943	MIRb	+	SINE/MIR	MIRb	83.4903	3.95272	21.1222	1.55172e-10	Yes	215	ENSG00000198053	SIRPA
chr11	67189676	67189952	AluSz	-	SINE/Alu	AluSz	69.4198	0.702178	98.8636	1.6746e-10	Yes	0	ENSG00000172508	CARNS1
chr3	39562437	39562741	AluSz6	-	SINE/Alu	AluSz6	36.1533	0.391366	92.3772	2.35475e-10	Yes	0	ENSG00000168314	MOBP
chr11	67189195	67189365	AluJr	-	SINE/Alu	AluJr	48.8795	0.47747	102.372	3.50375e-10	Yes	0	ENSG00000172508	CARNS1
chr8	25368352	25369710	L1ME1	-	LINE/L1	L1ME1	0.672128	42.3994	-63.0823	3.95912e-10	Yes	2917	ENSG00000184661	CDCA2
chr6	29636172	29636289	L2a	+	LINE/L2	L2a	45.2485	0.391492	115.58	4.30093e-10	Yes	0	ENSG00000204655	MOG
chr10	81907566	81908834	L1M1	+	LINE/L1	L1M1	51.6775	0.587721	87.9287	4.97749e-10	Yes	1812	ENSG00000122359	ANXA11
chr5	125833780	125834229	L1ME1	-	LINE/L1	L1ME1	77.948	1.1222	69.4601	5.00681e-10	Yes	1595	ENSG00000155324	GRAMD3
chr1	35327636	35327896	L2c	-	LINE/L2	L2c	263.229	15.6782	16.7895	5.79698e-10	Yes	-2220	ENSG00000163866	SMIM12
chr20	42215063	42215299	MIR	-	SINE/MIR	MIR	47.2092	0.590919	79.8911	8.08798e-10	Yes	0	ENSG00000101049	SGK2
chr1	168052197	168052312	L2c	+	LINE/L2	L2c	2.91366	81.9013	-28.1094	8.57261e-10	Yes	1686	ENSG00000143147	GPR161
chr11	63334576	63335268	LTR43	+	LTR/ERV1	LTR43	75.5655	1.89269	39.925	8.94885e-10	Yes	-3722	ENSG00000133328	HRASLS2
chr11	63337106	63337387	MER58B	+	DNA/hAT-Charlie	MER58B	163.978	1.46538	111.902	1.01488e-09	Yes	3281	ENSG00000176485	PLA2G16
chr9	87985072	87990640	MLT2A2|HERVL-int	-	LTR/ERVL	HERVL-int	41.571	0.522841	79.5099	1.01488e-09	Yes	170816	ENSG00000135049	AGTPBP1
chr1	35326972	35327544	LTR48B	-	LTR/ERV1	LTR48B	565.926	34.8066	16.2592	1.12042e-09	Yes	-1556	ENSG00000163866	SMIM12
chr11	67189953	67190097	AluJr	-	SINE/Alu	AluJr	30.7925	0.436098	70.6092	1.12042e-09	Yes	0	ENSG00000172508	CARNS1
chr10	46972384	46972918	LTR6A	+	LTR/ERV1	LTR6A	406.564	31.3296	12.977	1.14439e-09	Yes	-985	ENSG00000204176	SYT15
chr11	63338394	63338861	L1ME3F	-	LINE/L1	L1ME3F	179.848	2.39939	74.9557	1.14439e-09	Yes	1807	ENSG00000176485	PLA2G16
chr19	35305331	35305699	THE1D	+	LTR/ERVL-MaLR	THE1D	0.621504	29.7203	-47.8199	1.14439e-09	Yes	-41198	ENSG00000153896	ZNF599
chr19	35804923	35805117	MER102c	+	DNA/hAT-Charlie	MER102c	24.4756	0.391513	62.5154	1.14439e-09	Yes	217	ENSG00000105695	MAG
chr18	4014085	4014339	AluSc	-	SINE/Alu	AluSc	26.7255	0.431934	61.874	1.18848e-09	Yes	0	ENSG00000170579	DLGAP1
chr18	21848532	21849330	L2	+	LINE/L2	L2	37.1015	0.524073	70.7946	1.30774e-09	Yes	0	ENSG00000141447	OSBPL1A
chr6	29637572	29637844	AluSg	-	SINE/Alu	AluSg	33.5617	0.391669	85.6888	1.30976e-09	Yes	0	ENSG00000204655	MOG
chr18	74702128	74702635	MER31B	-	LTR/ERV1	MER31B	27.5721	0.436098	63.2246	1.39908e-09	Yes	0	ENSG00000197971	MBP
chr2	95885053	95886352	L1MDa	-	LINE/L1	L1MDa	22.9032	183.761	-8.02338	1.50989e-09	Yes	34989	ENSG00000163067	ZNF2
chr11	67189366	67189642	AluY	-	SINE/Alu	AluY	34.4991	0.472478	73.0174	1.65791e-09	Yes	0	ENSG00000172508	CARNS1
chr11	67190098	67190142	MIRb	-	SINE/MIR	MIRb	42.3027	0.581294	72.7734	1.65791e-09	Yes	0	ENSG00000172508	CARNS1
chr9	95567865	95568076	MIR	-	SINE/MIR	MIR	44.603	0.655574	68.0366	1.65791e-09	Yes	39799	ENSG00000127081	ZNF484
chr19	23285288	23285597	AluSz	-	SINE/Alu	AluSz	0.834078	34.5033	-41.367	1.7278e-09	Yes	0	ENSG00000183850	ZNF730
chr21	22113350	22113676	L1M6	-	LINE/L1	L1M6	28.7987	0.431863	66.6849	1.7278e-09	Yes	-256958	ENSG00000154654	NCAM2
chr6	76460332	76460596	AluSx	-	SINE/Alu	AluSx	1.85429	39.5398	-21.3234	1.7278e-09	Yes	0	ENSG00000196586	MYO6
chr18	51727951	51728248	AluY	+	SINE/Alu	AluY	0.631065	23.6671	-37.5034	1.76935e-09	Yes	0	ENSG00000134046	MBD2
chr17	76231982	76232176	MSTA	-	LTR/ERVL-MaLR	MSTA	28.1289	0.391525	71.8443	1.85322e-09	Yes	0	ENSG00000204278	TMEM235
chr5	125832927	125833233	AluSx1	-	SINE/Alu	AluSx1	57.9485	1.29324	44.8087	1.90615e-09	Yes	742	ENSG00000155324	GRAMD3
chr1	168050715	168050964	MIR	-	SINE/MIR	MIR	7.56707	133.308	-17.6169	2.02776e-09	Yes	3034	ENSG00000143147	GPR161
chr8	111958204	111962717	MER57-int|MER57-int|MER57-int	-	LTR/ERV1	MER57-int	28.5372	0.39208	72.7839	2.34056e-09	Yes	-970129	ENSG00000164794	KCNV1
chr21	48018268	48018527	AluSg	-	SINE/Alu	AluSg	28.4872	0.585024	48.6941	3.21434e-09	Yes	349	ENSG00000160307	S100B
chr20	44034069	44034242	L2	-	LINE/L2	L2	24.0599	0.477822	50.3534	3.53145e-09	Yes	0	ENSG00000254806	SYS1-DBNDD2
chr10	6866141	6875603	LTR5_Hs|HERVK-int|LTR5_Hs	-	LTR/ERVK	HERVK-int	35.3155	0.617791	57.1642	3.55922e-09	Yes	-243879	ENSG00000065675	PRKCQ
chr19	55792583	55793017	MLT1D	-	LTR/ERVL-MaLR	MLT1D	22.6753	0.391959	57.8511	4.01954e-09	Yes	-424	ENSG00000160469	BRSK1
chr1	17196506	17196857	THE1A	+	LTR/ERVL-MaLR	THE1A	1.90619	39.4482	-20.6948	4.22499e-09	Yes	0	ENSG00000058453	CROCC
chr1	31652212	31652484	AluSx	-	SINE/Alu	AluSx	15.6841	156.242	-9.96176	4.47706e-09	Yes	109	ENSG00000084628	NKAIN1
chr3	185357781	185359145	Tigger1	+	DNA/TcMar-Tigger	Tigger1	1.3599	42.5998	-31.3257	5.73475e-09	Yes	2383	ENSG00000073792	IGF2BP2
chr14	101396853	101397066	MER20	-	DNA/hAT-Charlie	MER20	88.5288	6.50151	13.6167	5.93244e-09	Yes	36208	ENSG00000269375	AL117190.3
chr20	42215586	42215887	AluSp	-	SINE/Alu	AluSp	30.5416	0.591514	51.6329	6.25506e-09	Yes	0	ENSG00000101049	SGK2
chr11	1285961	1287473	THE1A|THE1A-int	-	LTR/ERVL-MaLR	THE1A-int	208.427	18.4282	11.3102	6.5346e-09	Yes	2556	ENSG00000117983	MUC5B
chr12	120079978	120080282	AluSz	+	SINE/Alu	AluSz	20.1592	0.434831	46.3609	6.54313e-09	Yes	616	ENSG00000224982	TMEM233
chr20	1920997	1921161	MIRb	+	SINE/MIR	MIRb	84.0022	3.68149	22.8174	6.54313e-09	Yes	455	ENSG00000198053	SIRPA
chr16	27681338	27681945	HAL1b	-	LINE/L1	HAL1b	20.9236	0.431312	48.5115	6.84757e-09	Yes	0	ENSG00000047578	KIAA0556
chr5	36247703	36248011	AluSx1	+	SINE/Alu	AluSx1	105.676	2.13211	49.5641	6.84757e-09	Yes	526	ENSG00000164188	RANBP3L
chr15	42698642	42698878	MIRb	-	SINE/MIR	MIRb	36.7557	0.531934	69.0981	7.194e-09	Yes	0	ENSG00000092529	CAPN3
chr5	150651655	150652324	L1MC4a	+	LINE/L1	L1MC4a	340.173	27.1519	12.5285	7.37237e-09	Yes	1655	ENSG00000196743	GM2A
chr6	111920184	111920410	AluJr	-	SINE/Alu	AluJr	6.55391	55.1756	-8.41873	7.58991e-09	Yes	0	ENSG00000056972	TRAF3IP2
chr11	10592798	10593388	L1MA5A	-	LINE/L1	L1MA5A	36.122	0.753277	47.9532	7.91704e-09	Yes	0	ENSG00000133800	LYVE1
chr6	126252870	126253228	THE1D	+	LTR/ERVL-MaLR	THE1D	33.6111	2.05642	16.3445	8.31239e-09	Yes	605	ENSG00000111912	NCOA7
chr18	4014412	4014700	L1MA4	+	LINE/L1	L1MA4	24.386	0.478145	51.0011	8.48591e-09	Yes	0	ENSG00000170579	DLGAP1
chr3	152396043	152397289	HSMAR1	+	DNA/TcMar-Mariner	HSMAR1	25.6799	0.518281	49.5482	8.53849e-09	Yes	-155448	ENSG00000169860	P2RY1
chr18	74701344	74701609	L1MC1	-	LINE/L1	L1MC1	23.5145	0.391898	60.0017	1.05246e-08	Yes	0	ENSG00000197971	MBP
chr17	76231372	76231666	AluSp	-	SINE/Alu	AluSp	16.4177	0.392083	41.873	1.12085e-08	Yes	0	ENSG00000204278	TMEM235
chr5	173956069	173956525	MLT2D	-	LTR/ERVL	MLT2D	26.1857	0.458379	57.1267	1.16179e-08	Yes	-195012	ENSG00000120149	MSX2
chr6	166718939	166719141	Charlie30a	-	DNA/hAT-Charlie	Charlie30a	120.591	3.78661	31.8466	1.16179e-08	Yes	28	ENSG00000176381	PRR18
chr15	42700204	42700331	MIRc	-	SINE/MIR	MIRc	41.0678	0.574268	71.5132	1.22991e-08	Yes	0	ENSG00000092529	CAPN3
chr3	39549256	39549568	L2	+	LINE/L2	L2	14.5706	0.39232	37.1397	1.28631e-08	Yes	0	ENSG00000168314	MOBP
chr4	108831279	108831342	L2c	-	LINE/L2	L2c	24.7911	0.587774	42.1779	1.35797e-08	Yes	0	ENSG00000164023	SGMS2
chr19	23295553	23297100	MER57A-int|MER57B1	+	LTR/ERV1	MER57A-int	3.86698	68.5725	-17.7328	1.40209e-08	Yes	0	ENSG00000183850	ZNF730
chr4	17486047	17486207	MIRb	+	SINE/MIR	MIRb	80.755	8.82429	9.15144	1.40209e-08	Yes	0	ENSG00000151552	QDPR
chr10	88800116	88800572	LTR2	-	LTR/ERV1	LTR2	110.357	2.90467	37.993	1.4982e-08	Yes	9672	ENSG00000148672	GLUD1
chr1	168052397	168052447	L2d2	+	LINE/L2	L2d2	2.5535	46.4729	-18.1997	1.53446e-08	Yes	1551	ENSG00000143147	GPR161
chr4	17487789	17487895	MIR3	+	SINE/MIR	MIR3	58.5835	6.47885	9.04226	1.53446e-08	Yes	0	ENSG00000151552	QDPR
chr5	111062655	111062800	MER102c	-	DNA/hAT-Charlie	MER102c	0.922607	24.1617	-26.1886	1.53446e-08	Yes	0	ENSG00000134986	NREP
chr9	139660751	139661748	LTR13	+	LTR/ERVK	LTR13	17.742	0.391968	45.264	1.61595e-08	Yes	-45	ENSG00000177984	LCN15
chr2	95882690	95883713	MLT1A|MLT1A-int|MLT1A-int	-	LTR/ERVL-MaLR	MLT1A-int	8.94667	80.7274	-9.02318	1.6689e-08	Yes	32626	ENSG00000163067	ZNF2
chr8	6617706	6617937	AluJr	+	SINE/Alu	AluJr	16.9244	122.903	-7.26187	1.68534e-08	Yes	523	ENSG00000155189	AGPAT5
chr8	112893340	112893649	AluSx1	+	SINE/Alu	AluSx1	0.850064	26.5264	-31.2051	1.68534e-08	Yes	341509	ENSG00000164796	CSMD3
chr1	35329008	35329150	L2c	+	LINE/L2	L2c	76.8047	6.20232	12.3832	1.75956e-08	Yes	1888	ENSG00000116544	DLGAP3
chr15	91855089	91856933	L1M4b	+	LINE/L1	L1M4b	29.5989	0.639712	46.2692	1.75956e-08	Yes	10551	ENSG00000185518	SV2B
chr6	29641589	29641901	AluSp	+	SINE/Alu	AluSp	21.546	0.481032	44.7911	1.88691e-08	Yes	0	ENSG00000204644	ZFP57
chr4	139235380	139236951	L1PREC2	-	LINE/L1	L1PREC2	13.4447	0.39333	34.1816	2.02115e-08	Yes	-71878	ENSG00000151012	SLC7A11
chr10	128348672	128349320	MLT1E1A	+	LTR/ERVL-MaLR	MLT1E1A	15.3002	0.43399	35.2547	2.03741e-08	Yes	0	ENSG00000154493	C10orf90
chr11	93917413	93917547	L2a	+	LINE/L2	L2a	31.2347	237.573	-7.60607	2.03741e-08	Yes	2276	ENSG00000110218	PANX1
chr5	82878372	82878536	MIR	-	SINE/MIR	MIR	1.55192	37.0994	-23.9054	2.03741e-08	Yes	251	ENSG00000038427	VCAN
chr16	74754459	74755053	L1MB8	-	LINE/L1	L1MB8	20.5867	0.431969	47.6578	2.11581e-08	Yes	0	ENSG00000103089	FA2H
chr2	73275354	73275644	AluSx	-	SINE/Alu	AluSx	30.4265	0.778121	39.1025	2.1189e-08	Yes	0	ENSG00000144040	SFXN5
chr2	39829037	39830052	L1ME2z	-	LINE/L1	L1ME2z	110.156	12.3077	8.9502	2.12718e-08	Yes	-62071	ENSG00000152154	TMEM178A
chr2	61248198	61249617	L1P2	+	LINE/L1	L1P2	6.12247	55.0868	-8.99749	2.14591e-08	Yes	0	ENSG00000162928	PEX13
chr1	11700852	11701058	MIRb	+	SINE/MIR	MIRb	22.92	0.537978	42.6041	2.16779e-08	Yes	7367	ENSG00000116661	FBXO2
chr2	11262258	11262790	MER41A	-	LTR/ERV1	MER41A	36.2633	0.928474	39.0569	2.22468e-08	Yes	-10390	ENSG00000150873	C2orf50
chr8	53309036	53309400	THE1C	-	LTR/ERVL-MaLR	THE1C	15.0901	0.393346	38.3634	2.28426e-08	Yes	0	ENSG00000147488	ST18
chr8	53287721	53288955	L2d	+	LINE/L2	L2d	11.7748	0.392289	30.0156	2.30496e-08	Yes	0	ENSG00000147488	ST18
chr1	168053586	168053770	MIR3	-	SINE/MIR	MIR3	3.76378	81.902	-21.7606	2.31682e-08	Yes	228	ENSG00000143147	GPR161
chr20	42214676	42214970	AluSz	-	SINE/Alu	AluSz	32.5657	0.607169	53.6353	2.31682e-08	Yes	0	ENSG00000101049	SGK2
chr4	15669399	15669680	AluSp	+	SINE/Alu	AluSp	0.989145	39.2574	-39.6882	2.35036e-08	Yes	0	ENSG00000118564	FBXL5
chr4	108830669	108830785	L2b	+	LINE/L2	L2b	37.7087	0.798502	47.2244	2.38363e-08	Yes	0	ENSG00000164023	SGMS2
chr13	74045947	74046258	AluSq	-	SINE/Alu	AluSq	10.8743	0.392776	27.6858	2.43444e-08	Yes	213969	ENSG00000118922	KLF12
chr1	35327897	35328126	MIR	+	SINE/MIR	MIR	142.706	10.1732	14.0276	2.54317e-08	Yes	-2481	ENSG00000163866	SMIM12
chr1	35328467	35328686	L2c	+	LINE/L2	L2c	180.526	16.3088	11.0692	2.54317e-08	Yes	2352	ENSG00000116544	DLGAP3
chr11	63340505	63340638	FLAM_C	-	SINE/Alu	FLAM_C	43.389	0.988908	43.8757	2.54317e-08	Yes	30	ENSG00000176485	PLA2G16
chr12	121624391	121624701	AluSx1	+	SINE/Alu	AluSx1	66.4628	4.08608	16.2657	2.54317e-08	Yes	516	ENSG00000089041	P2RX7
chr19	23283433	23283754	AluSg	-	SINE/Alu	AluSg	0.772076	21.0379	-27.2485	2.54317e-08	Yes	0	ENSG00000183850	ZNF730
chr2	86148640	86149262	MER61F	+	LTR/ERV1	MER61F	21.8886	0.527647	41.4835	2.54317e-08	Yes	-32504	ENSG00000115525	ST3GAL5
chr3	185359773	185360542	Tigger1	+	DNA/TcMar-Tigger	Tigger1	0.672652	18.4841	-27.4794	2.54317e-08	Yes	986	ENSG00000073792	IGF2BP2
chr5	111063436	111063779	MLT1F1	+	LTR/ERVL-MaLR	MLT1F1	0.793082	21.1385	-26.6536	2.54317e-08	Yes	0	ENSG00000134986	NREP
chr1	46691213	46691637	MLT1D	-	LTR/ERVL-MaLR	MLT1D	37.2324	1.7138	21.725	2.59514e-08	Yes	4281	ENSG00000171357	LURAP1
chr10	98115288	98115734	MamTip3	+	DNA/hAT-Tip100	MamTip3	17.6241	0.391912	44.9695	2.67911e-08	Yes	0	ENSG00000197430	OPALIN
chr10	46972107	46972383	MLT1D	-	LTR/ERVL-MaLR	MLT1D	282.198	25.79	10.9422	2.72396e-08	Yes	-708	ENSG00000204176	SYT15
chr6	34503647	34503736	MIR3	+	SINE/MIR	MIR3	15.4943	0.481126	32.2043	2.82921e-08	Yes	642	ENSG00000124507	PACSIN1
chr1	168050972	168051036	MIRb	+	SINE/MIR	MIRb	3.15838	54.9681	-17.4039	2.87299e-08	Yes	2962	ENSG00000143147	GPR161
chr6	29637062	29637367	AluSq2	-	SINE/Alu	AluSq2	19.5914	0.392605	49.901	2.87299e-08	Yes	0	ENSG00000204655	MOG
chr6	80752661	80753760	L1MC1	-	LINE/L1	L1MC1	1.10219	30.6245	-27.7851	3.24173e-08	Yes	418	ENSG00000112742	TTK
chr17	42638099	42638381	AluSx4	-	SINE/Alu	AluSx4	5.50353	83.9666	-15.2569	3.26608e-08	Yes	1193	ENSG00000180340	FZD2
chr2	95883686	95884713	MLT1B-int|MLT1B-int|MLT1B	-	LTR/ERVL-MaLR	MLT1B-int	8.72368	94.9775	-10.8873	3.26608e-08	Yes	33622	ENSG00000163067	ZNF2
chr3	39565282	39565441	MIRc	+	SINE/MIR	MIRc	15.9771	0.392296	40.7272	3.26608e-08	Yes	0	ENSG00000168314	MOBP
chr5	119375965	119376423	L4_C_Mam	-	LINE/RTE-X	L4_C_Mam	12.9229	0.434335	29.7533	3.26608e-08	Yes	403072	ENSG00000133835	HSD17B4
chr10	71170404	71170821	LTR47B2	+	LTR/ERVL	LTR47B2	49.5531	2.66717	18.5789	3.34446e-08	Yes	0	ENSG00000075073	TACR2
chr12	132865557	132866020	HAL1ME	-	LINE/L1	HAL1ME	14.2597	0.436097	32.6984	3.34446e-08	Yes	0	ENSG00000182870	GALNT9
chr17	42395269	42395334	L2b	+	LINE/L2	L2b	134.199	15.2106	8.82272	3.34446e-08	Yes	0	ENSG00000108309	RUNDC3A
chr18	74706989	74708808	L1ME1	+	LINE/L1	L1ME1	27.9558	0.553674	50.4914	3.34446e-08	Yes	0	ENSG00000197971	MBP
chr6	34494561	34494773	ORSL-2a	+	DNA/hAT-Tip100	ORSL-2a	30.334	1.39789	21.6999	3.34446e-08	Yes	0	ENSG00000124507	PACSIN1
chr1	44931301	44932877	Tigger1	-	DNA/TcMar-Tigger	Tigger1	9.71439	0.392465	24.7522	3.44483e-08	Yes	0	ENSG00000187147	RNF220
chr5	151108942	151110019	MER11B	-	LTR/ERVK	MER11B	99.6712	13.3396	7.47183	3.5336e-08	Yes	11859	ENSG00000177556	ATOX1
chr16	27685534	27686394	MLT1D|MLT1D-int	-	LTR/ERVL-MaLR	MLT1D-int	10.9352	0.392719	27.8447	3.53911e-08	Yes	0	ENSG00000047578	KIAA0556
chr21	15224427	15226713	MSTA|MSTA-int|MSTA|MSTA|MSTA-int|MSTA-int	-	LTR/ERVL-MaLR	MSTA-int	11.8944	0.392308	30.3191	3.59465e-08	Yes	-170969	ENSG00000269011	AL050303.1
chr11	10593389	10593933	MLT1E2-int	-	LTR/ERVL-MaLR	MLT1E2-int	31.3335	0.887657	35.2991	3.76877e-08	Yes	0	ENSG00000133800	LYVE1
chr12	121623882	121624155	MLT1G	+	LTR/ERVL-MaLR	MLT1G	72.7481	3.56513	20.4054	3.76877e-08	Yes	7	ENSG00000089041	P2RX7
chr11	63337853	63338305	L1ME3F	-	LINE/L1	L1ME3F	180.556	2.06795	87.3112	3.99101e-08	Yes	2363	ENSG00000176485	PLA2G16
chr19	35828161	35828556	L2a	-	LINE/L2	L2a	12.0911	0.393125	30.7565	4.02924e-08	Yes	0	ENSG00000012124	CD22
chr5	125831470	125831669	MLT1N2	-	LTR/ERVL-MaLR	MLT1N2	29.9413	0.825893	36.2532	4.02924e-08	Yes	0	ENSG00000155324	GRAMD3
chr2	112796923	112797805	LTR17|HERV17-int|HERV17-int|HERV17-int	-	LTR/ERV1	HERV17-int	39.9016	2.79165	14.2932	4.28983e-08	Yes	9786	ENSG00000153208	MERTK
chr11	67185581	67185700	MIR3	-	SINE/MIR	MIR3	21.8809	0.433566	50.4674	4.45969e-08	Yes	0	ENSG00000172531	PPP1CA
chr17	79349548	79349970	MLT2D	+	LTR/ERVL	MLT2D	22.5571	0.636373	35.4464	4.45969e-08	Yes	-19306	ENSG00000263053	RP11-1055B8.6
chr20	1871648	1871822	MIRb	+	SINE/MIR	MIRb	39.4216	1.86365	21.1529	4.45969e-08	Yes	-3333	ENSG00000198053	SIRPA
chr21	48005461	48007480	L1PB1	+	LINE/L1	L1PB1	60.018	3.27653	18.3175	4.45969e-08	Yes	11396	ENSG00000160307	S100B
chr21	15227394	15229839	MSTA-int|MSTA|MSTA-int|MSTA|MSTA|MSTA-int|MSTA-int	-	LTR/ERVL-MaLR	MSTA-int	13.0864	0.392515	33.34	4.48873e-08	Yes	-173936	ENSG00000269011	AL050303.1
chr3	39563574	39563695	MIR	+	SINE/MIR	MIR	14.298	0.392336	36.4432	4.51658e-08	Yes	0	ENSG00000168314	MOBP
chr11	63340323	63340429	AluSg7	-	SINE/Alu	AluSg7	27.2209	0.643344	42.3115	4.55146e-08	Yes	239	ENSG00000176485	PLA2G16
chr15	42699532	42699826	AluY	-	SINE/Alu	AluY	18.985	0.482029	39.3856	4.65409e-08	Yes	0	ENSG00000092529	CAPN3
chr16	27686749	27687848	MLT1D-int	-	LTR/ERVL-MaLR	MLT1D-int	17.5201	0.450338	38.9044	4.65409e-08	Yes	0	ENSG00000047578	KIAA0556
chr4	17486896	17487180	AluJr	+	SINE/Alu	AluJr	72.7999	10.0916	7.21391	4.9877e-08	Yes	0	ENSG00000151552	QDPR
chr1	205486570	205487518	L2a	+	LINE/L2	L2a	19.1594	0.436095	43.9341	4.99895e-08	Yes	0	ENSG00000117266	CDK18
chr19	35799025	35799346	L2a	-	LINE/L2	L2a	11.3945	0.392544	29.0273	5.19971e-08	Yes	0	ENSG00000105695	MAG
chr4	108830256	108830566	AluSx	-	SINE/Alu	AluSx	34.6677	0.92821	37.349	5.23332e-08	Yes	0	ENSG00000164023	SGMS2
chr5	148372225	148372357	MIRc	-	SINE/MIR	MIRc	10.218	0.392777	26.0147	5.39903e-08	Yes	0	ENSG00000169247	SH3TC2
chr4	108826248	108826602	THE1B	-	LTR/ERVL-MaLR	THE1B	11.9608	0.392733	30.4554	5.41802e-08	Yes	0	ENSG00000164023	SGMS2
chr4	159183325	159183744	L1ME4b	-	LINE/L1	L1ME4b	11.5674	0.392588	29.4644	5.41802e-08	Yes	6763	ENSG00000164124	TMEM144
chr5	152099578	152104582	LTR10B1|HERVIP10B3-int|HERVIP10B3-int|HERVIP10B3-int|HERVIP10B3-int|LTR10B1	+	LTR/ERV1	HERVIP10B3-int	14.381	0.434607	33.0897	5.42037e-08	Yes	-286650	ENSG00000132911	NMUR2
chr3	133489842	133490300	L1MC4	+	LINE/L1	L1MC4	21.9428	0.431081	50.9019	5.6001e-08	Yes	0	ENSG00000091513	TF
chr1	206829924	206830222	AluSx	+	SINE/Alu	AluSx	0.620854	16.6761	-26.8599	5.84672e-08	Yes	0	ENSG00000143479	DYRK3
chr5	148370349	148370530	MIRb	-	SINE/MIR	MIRb	13.4091	0.432703	30.9892	5.84672e-08	Yes	0	ENSG00000169247	SH3TC2
chr10	81902480	81902778	AluJb	-	SINE/Alu	AluJb	18.5382	0.535278	34.6328	5.99396e-08	Yes	0	ENSG00000189129	PLAC9
chr10	91090945	91091229	AluJr	-	SINE/Alu	AluJr	51.7949	4.15196	12.4748	6.24665e-08	Yes	0	ENSG00000107798	LIPA
chr5	178511590	178512539	MLT1F2|MLT1F2-int	+	LTR/ERVL-MaLR	MLT1F2-int	34.54	167.109	-4.83812	6.31085e-08	Yes	1053	ENSG00000177932	ZNF354C
chr10	91092988	91093157	MER5A	+	DNA/hAT-Charlie	MER5A	36.6495	2.38106	15.3921	6.47776e-08	Yes	0	ENSG00000107798	LIPA
chr19	36875913	36877557	MSTD|MSTD-int	+	LTR/ERVL-MaLR	MSTD-int	21.8455	146.504	-6.70637	6.74556e-08	Yes	0	ENSG00000181007	ZFP82
chr10	88446291	88446593	AluJr	+	SINE/Alu	AluJr	14.331	0.392771	36.487	7.10227e-08	Yes	0	ENSG00000122367	LDB3
chr4	15669240	15669398	Charlie9	+	DNA/hAT-Charlie	Charlie9	0.748339	23.2295	-31.0414	7.24658e-08	Yes	0	ENSG00000118564	FBXL5
chr15	90049556	90049991	MLT2B4	+	LTR/ERVL	MLT2B4	5.79466	51.571	-8.89974	7.25615e-08	Yes	-9713	ENSG00000140519	RHCG
chr7	94665621	94666103	LTR67B	-	LTR/ERVL	LTR67B	15.0152	0.468412	32.0556	7.35123e-08	Yes	0	ENSG00000158528	PPP1R9A
chr6	29636703	29636997	AluSq2	-	SINE/Alu	AluSq2	20.2886	0.392083	51.7456	7.45462e-08	Yes	0	ENSG00000204655	MOG
chr1	230932947	230933266	L1MC5a	-	LINE/L1	L1MC5a	23.8708	0.601731	39.6702	7.60723e-08	Yes	0	ENSG00000135773	CAPN9
chr19	55793814	55794063	L2a	+	LINE/L2	L2a	11.0148	0.434065	25.3759	7.67232e-08	Yes	0	ENSG00000160469	BRSK1
chr1	35328687	35329007	MSTD	+	LTR/ERVL-MaLR	MSTD	136.891	12.3257	11.1061	7.74576e-08	Yes	2031	ENSG00000116544	DLGAP3
chr12	132908466	132908593	MIR	-	SINE/MIR	MIR	37.0908	1.51023	24.5597	7.76972e-08	Yes	-2532	ENSG00000182870	GALNT9
chr20	1707885	1714216	LTR7|HERVH-int|HERVH-int|HERVH-int|HERVH-int|HERVH-int|LTR7	-	LTR/ERV1	HERVH-int	17.9276	0.558452	32.1023	7.81029e-08	Yes	-69461	ENSG00000089012	SIRPG
chr18	15183879	15184183	AluSg	-	SINE/Alu	AluSg	14.1705	0.451983	31.3518	7.92488e-08	Yes	331143	ENSG00000180777	ANKRD30B
chr18	22087441	22088202	L1MA2	+	LINE/L1	L1MA2	10.421	0.392459	26.5531	8.17341e-08	Yes	27521	ENSG00000134489	HRH4
chr13	39664421	39664812	MER96B	-	DNA/hAT-Tip100	MER96B	10.8195	0.394203	27.4465	8.17771e-08	Yes	40176	ENSG00000188811	NHLRC3
chr16	88128723	88128828	L1MB8	+	LINE/L1	L1MB8	11.6552	0.434775	26.8074	8.27248e-08	Yes	17800	ENSG00000172530	BANP
chr10	98112705	98112932	MIR	-	SINE/MIR	MIR	12.8432	0.39237	32.7324	8.32458e-08	Yes	0	ENSG00000197430	OPALIN
chr1	45096219	45096534	L2b	-	LINE/L2	L2b	15.0317	0.433611	34.6664	8.3378e-08	Yes	0	ENSG00000187147	RNF220
chr12	120079485	120079915	MER113	+	DNA/hAT-Charlie	MER113	13.9913	0.484009	28.9071	8.3378e-08	Yes	123	ENSG00000224982	TMEM233
chr4	17484615	17485009	MLT1B	-	LTR/ERVL-MaLR	MLT1B	159.376	21.1759	7.5263	8.3378e-08	Yes	0	ENSG00000151552	QDPR
chr5	147859115	147859504	X26_DNA	-	DNA/TcMar-Tigger	X26_DNA	18.0314	0.391519	46.0549	8.3378e-08	Yes	0	ENSG00000164270	HTR4
chr8	20986274	20986785	L2a	+	LINE/L2	L2a	8.3268	0.393767	21.1465	8.3378e-08	Yes	561131	ENSG00000168546	GFRA2
chr7	124384488	124384840	L2c	+	LINE/L2	L2c	50.4419	1.50048	33.6173	8.57292e-08	Yes	1212	ENSG00000170775	GPR37
chr3	46459047	46465391	LTR18A|HERVL18-int|HERVL18-int|HERVL18-int|LTR18A	-	LTR/ERVL	HERVL18-int	22.8459	0.454083	50.3123	8.61237e-08	Yes	4560	ENSG00000121797	CCRL2
chr9	97910057	97911521	Charlie1	+	DNA/hAT-Charlie	Charlie1	63.3609	2.11028	30.0249	8.61237e-08	Yes	0	ENSG00000158169	FANCC
chr19	28333235	28337841	HERVFH21-int|LTR21B	-	LTR/ERV1	HERVFH21-int	13.3151	0.475977	27.9742	8.73232e-08	Yes	1360333	ENSG00000169021	UQCRFS1
chr20	21482759	21483106	MLT1B	-	LTR/ERVL-MaLR	MLT1B	15.9556	0.480297	33.2203	8.95411e-08	Yes	8543	ENSG00000125820	NKX2-2
chr21	48003834	48004560	L1M4b	+	LINE/L1	L1M4b	22.5432	0.632051	35.6668	8.95411e-08	Yes	13909	ENSG00000160305	DIP2A
chr9	114313982	114316040	Charlie5	-	DNA/hAT-Charlie	Charlie5	1809.24	164.864	10.9741	8.95411e-08	Yes	0	ENSG00000173258	ZNF483
chr18	74704104	74704439	MER1B	-	DNA/hAT-Charlie	MER1B	16.6116	0.477971	34.7545	8.96475e-08	Yes	0	ENSG00000197971	MBP
chr10	96366105	96366398	AluJr	-	SINE/Alu	AluJr	0.624785	15.0119	-24.0272	8.96956e-08	Yes	0	ENSG00000119969	HELLS
chr16	24887234	24887546	AluSz	+	SINE/Alu	AluSz	10.7299	0.394608	27.1912	8.96956e-08	Yes	0	ENSG00000158865	SLC5A11
chr19	3782407	3782624	L2d2	-	LINE/L2	L2d2	34.1674	1.23648	27.6328	8.96956e-08	Yes	0	ENSG00000007264	MATK
chr2	2834726	2835033	MSTD|MSTD	+	LTR/ERVL-MaLR	MSTD	12.4354	0.434431	28.6246	8.96956e-08	Yes	357664	ENSG00000032389	TSSC1
chr21	15257501	15259177	MSTA|MSTA-int	-	LTR/ERVL-MaLR	MSTA-int	7.28145	0.394728	18.4467	8.96956e-08	Yes	-204043	ENSG00000269011	AL050303.1
chr8	27664134	27664431	AluSq2	-	SINE/Alu	AluSq2	0.627829	16.3144	-25.9855	8.96956e-08	Yes	0	ENSG00000171320	ESCO2
chr1	60354050	60356325	THE1B|THE1B-int|THE1B	-	LTR/ERVL-MaLR	THE1B-int	17.81	0.516197	34.5023	9.44971e-08	Yes	2656	ENSG00000134716	CYP2J2
chr4	14003068	14005436	THE1B|THE1B-int|THE1B	+	LTR/ERVL-MaLR	THE1B-int	78.1805	4.97784	15.7057	9.92812e-08	Yes	-373722	ENSG00000038219	BOD1L1
chr4	17486579	17486895	L1MB5	+	LINE/L1	L1MB5	71.1734	8.92136	7.97786	1.00682e-07	Yes	0	ENSG00000151552	QDPR
chr6	29637368	29637505	Charlie4a	-	DNA/hAT-Charlie	Charlie4a	20.5483	0.392162	52.3974	1.02312e-07	Yes	0	ENSG00000204655	MOG
chr5	150651354	150651654	AluSx	+	SINE/Alu	AluSx	62.0813	6.68132	9.29177	1.02716e-07	Yes	1354	ENSG00000196743	GM2A
chr20	21480576	21480733	MIRc	-	SINE/MIR	MIRc	14.8902	0.480936	30.9609	1.04244e-07	Yes	10916	ENSG00000125820	NKX2-2
chr5	125830824	125831024	L1M5	+	LINE/L1	L1M5	14.0521	0.532266	26.4005	1.052e-07	Yes	0	ENSG00000155324	GRAMD3
chr1	214840665	214841499	L1PA16	+	LINE/L1	L1PA16	2.01296	42.7128	-21.2189	1.05359e-07	Yes	2735	ENSG00000117724	CENPF
chr1	850358	850777	L1MEc	+	LINE/L1	L1MEc	2.48654	33.833	-13.6065	1.07165e-07	Yes	-9484	ENSG00000187634	SAMD11
chr21	15231230	15233333	MSTA|MSTA-int|MSTA|MSTA|MSTA-int|MSTA-int	-	LTR/ERVL-MaLR	MSTA-int	9.56548	0.392785	24.353	1.07231e-07	Yes	-177772	ENSG00000269011	AL050303.1
chr14	23815289	23815387	MIRb	+	SINE/MIR	MIRb	119.137	21.4126	5.56385	1.0834e-07	Yes	129	ENSG00000092096	SLC22A17
chr6	29635865	29635939	MIR	-	SINE/MIR	MIR	16.4993	0.392511	42.0353	1.0834e-07	Yes	0	ENSG00000204655	MOG
chr5	82878634	82878747	L2a	-	LINE/L2	L2a	0.730939	15.2429	-20.8538	1.0997e-07	Yes	513	ENSG00000038427	VCAN
chr10	81916803	81916987	MIRb	-	SINE/MIR	MIRb	18.0309	0.515704	34.9636	1.10963e-07	Yes	0	ENSG00000122359	ANXA11
chr16	27675136	27675432	AluJr	-	SINE/Alu	AluJr	7.202	0.393239	18.3146	1.11323e-07	Yes	0	ENSG00000047578	KIAA0556
chr19	2287741	2287852	MIRb	-	SINE/MIR	MIRb	48.5957	2.23738	21.7199	1.12002e-07	Yes	1923	ENSG00000220008	LINGO3
chr16	88128392	88128658	AluJr	+	SINE/Alu	AluJr	31.1585	0.624503	49.8933	1.14551e-07	Yes	17469	ENSG00000172530	BANP
chr22	28319526	28319778	MIRb	+	SINE/MIR	MIRb	7.27354	52.5408	-7.22355	1.14551e-07	Yes	-3405	ENSG00000180957	PITPNB
chr1	25892605	25892932	L1ME4a	-	LINE/L1	L1ME4a	17.6993	0.556159	31.8241	1.16808e-07	Yes	0	ENSG00000157978	LDLRAP1
chr6	33374904	33375206	AluJb	+	SINE/Alu	AluJb	0.535546	20.281	-37.8697	1.16808e-07	Yes	0	ENSG00000237649	KIFC1
chr9	138597918	138598038	MIRb	+	SINE/MIR	MIRb	10.889	0.392557	27.7385	1.19761e-07	Yes	0	ENSG00000107147	KCNT1
chr10	46968308	46968442	MIRb	+	SINE/MIR	MIRb	68.7904	9.08092	7.57527	1.19997e-07	Yes	0	ENSG00000204176	SYT15
chr19	35816689	35818374	L1MB8	-	LINE/L1	L1MB8	13.0402	0.393003	33.181	1.21908e-07	Yes	0	ENSG00000012124	CD22
chr18	4021587	4021898	AluSx	-	SINE/Alu	AluSx	7.48828	0.393428	19.0334	1.24025e-07	Yes	0	ENSG00000170579	DLGAP1
chr5	148373740	148373967	MIRb	+	SINE/MIR	MIRb	10.5991	0.433415	24.4549	1.25359e-07	Yes	0	ENSG00000169247	SH3TC2
chr19	36750410	36756122	LTR7B|HERVH-int|HERVH-int|HERVH-int|HERVH-int|HERVH-int|HERVH-int|LTR7B	-	LTR/ERV1	HERVH-int	57.4339	3.55446	16.1583	1.278e-07	Yes	-13252	ENSG00000196357	ZNF565
chr20	1787031	1787554	MLT1H1	-	LTR/ERVL-MaLR	MLT1H1	53.7647	2.27421	23.6411	1.278e-07	Yes	-87601	ENSG00000198053	SIRPA
chr18	74711418	74711697	AluSz6	-	SINE/Alu	AluSz6	7.34983	0.394468	18.6323	1.28963e-07	Yes	0	ENSG00000197971	MBP
chr10	128350219	128351170	L1MB4	-	LINE/L1	L1MB4	12.4905	0.432477	28.8812	1.33348e-07	Yes	0	ENSG00000154493	C10orf90
chr15	91858353	91858426	MIRb	+	SINE/MIR	MIRb	6.63687	0.393227	16.8779	1.3781e-07	Yes	13815	ENSG00000185518	SV2B
chr5	63909226	63909383	L2a	+	LINE/L2	L2a	104.215	11.8075	8.82614	1.3781e-07	Yes	1088	ENSG00000186479	RGS7BP
chr12	113829220	113829431	L2a	-	LINE/L2	L2a	195.891	33.2385	5.89351	1.38834e-07	Yes	820	ENSG00000135094	SDS
chr9	131543725	131544226	LOR1a	+	LTR/ERV1	LOR1a	18.3657	0.569066	32.2735	1.38834e-07	Yes	-5258	ENSG00000107021	TBC1D13
chr21	15270096	15272201	MSTA|MSTA-int|MSTA|MSTA|MSTA-int|MSTA-int	-	LTR/ERVL-MaLR	MSTA-int	8.27717	0.393897	21.0135	1.42021e-07	Yes	208934	ENSG00000188992	LIPI
chr15	42698299	42698535	MIR	-	SINE/MIR	MIR	24.7887	0.475957	52.0817	1.4739e-07	Yes	0	ENSG00000092529	CAPN3
chr16	74753850	74753940	L3	+	LINE/CR1	L3	10.7841	0.393969	27.3728	1.4841e-07	Yes	0	ENSG00000103089	FA2H
chr1	35328305	35328387	L2c	+	LINE/L2	L2c	154.983	14.5634	10.6419	1.57786e-07	Yes	2651	ENSG00000116544	DLGAP3
chr10	91094212	91094547	AluSq4	-	SINE/Alu	AluSq4	41.066	2.30541	17.8129	1.5843e-07	Yes	0	ENSG00000107798	LIPA
chr3	39553100	39553259	L2b	+	LINE/L2	L2b	14.0914	0.392807	35.8737	1.59301e-07	Yes	0	ENSG00000168314	MOBP
chr5	135216301	135216778	L2b	+	LINE/L2	L2b	20.2625	0.662619	30.5795	1.59301e-07	Yes	0	ENSG00000145832	SLC25A48
chr6	163604096	163604257	L2d2	-	LINE/L2	L2d2	8.94229	0.393195	22.7426	1.69736e-07	Yes	0	ENSG00000112530	PACRG
chr9	124060437	124060698	L2d	+	LINE/L2	L2d	18.6497	0.392026	47.5726	1.72821e-07	Yes	0	ENSG00000148180	GSN
chr13	114797405	114798007	LTR39	+	LTR/ERV1	LTR39	17.2477	0.52705	32.7249	1.73903e-07	Yes	0	ENSG00000185989	RASA3
chrX	100419873	100420834	L2a	-	LINE/L2	L2a	4.8604	59.8088	-12.3053	1.73903e-07	Yes	1204	ENSG00000102384	CENPI
chr4	87843573	87844102	LTR41C	+	LTR/ERVL	LTR41C	43.2558	1.29198	33.4804	1.77082e-07	Yes	0	ENSG00000163633	C4orf36
chr9	131014264	131014480	MIRc	+	SINE/MIR	MIRc	49.9406	2.60895	19.142	1.77098e-07	Yes	0	ENSG00000106976	DNM1
chr2	2782591	2783345	L2	+	LINE/L2	L2	6.14609	0.394227	15.5902	1.84103e-07	Yes	409352	ENSG00000032389	TSSC1
chr3	196697588	196698447	MER54A	-	LTR/ERVL	MER54A	40.9698	2.33141	17.5729	1.84163e-07	Yes	-1658	ENSG00000119227	PIGZ
chr15	56365299	56365585	AluSx1	-	SINE/Alu	AluSx1	1.68546	27.6941	-16.4311	1.84419e-07	Yes	13894	ENSG00000181827	RFX7
chr12	123897795	123899225	LTR12C	-	LTR/ERV1	LTR12C	29.7236	3.26336	9.10831	1.88236e-07	Yes	712	ENSG00000150977	RILPL2
chrX	134227152	134227440	AluSg	-	SINE/Alu	AluSg	24.7372	2.38548	10.3699	1.89091e-07	Yes	-40927	ENSG00000203950	FAM127B
chr9	124061146	124061390	HAL1	+	LINE/L1	HAL1	18.8699	0.530832	35.5477	2.03667e-07	Yes	0	ENSG00000148180	GSN
chr19	19965986	19967242	LTR70	-	LTR/ERV1	LTR70	0.905992	28.9124	-31.9125	2.06582e-07	Yes	-9454	ENSG00000256771	ZNF253
chr2	181934849	181935443	L2a	-	LINE/L2	L2a	3.18843	37.6233	-11.7999	2.10138e-07	Yes	0	ENSG00000170035	UBE2E3
chr15	52407538	52407708	MIRb	+	SINE/MIR	MIRb	90.8952	12.0467	7.54526	2.14313e-07	Yes	-2567	ENSG00000137875	BCL2L10
chr6	31732710	31732873	FRAM	-	SINE/Alu	FRAM	21.9611	0.737305	29.7856	2.14313e-07	Yes	83	ENSG00000255152	MSH5-SAPCD1
chr21	48003451	48003833	MSTD	+	LTR/ERVL-MaLR	MSTD	34.018	1.70284	19.9772	2.20693e-07	Yes	13526	ENSG00000160305	DIP2A
chr5	148373454	148373633	MIR	-	SINE/MIR	MIR	14.5506	0.475556	30.5971	2.23547e-07	Yes	0	ENSG00000169247	SH3TC2
chr1	44976107	44976515	L2c	+	LINE/L2	L2c	7.5844	0.394654	19.2178	2.24375e-07	Yes	0	ENSG00000187147	RNF220
chr19	55645784	55646057	AluJb	+	SINE/Alu	AluJb	0.922844	37.5286	-40.6662	2.24375e-07	Yes	0	ENSG00000105048	TNNT1
chr20	44852124	44852236	L2a	+	LINE/L2	L2a	9.26664	0.392953	23.582	2.24645e-07	Yes	0	ENSG00000149654	CDH22
chr13	79195316	79196303	Tigger6a	+	DNA/TcMar-Tigger	Tigger6a	31.3549	0.93073	33.6886	2.266e-07	Yes	0	ENSG00000152193	RNF219
chr18	74709960	74710407	L1MB3	-	LINE/L1	L1MB3	8.56083	0.392593	21.8059	2.31322e-07	Yes	0	ENSG00000197971	MBP
chr17	72871976	72872217	LTR33	-	LTR/ERVL	LTR33	28.3893	0.790284	35.9229	2.31348e-07	Yes	1212	ENSG00000172782	FADS6
chr6	136658700	136659041	LTR16C	-	LTR/ERVL	LTR16C	32.5508	1.10816	29.3737	2.31348e-07	Yes	4835	ENSG00000135525	MAP7
chr6	163602839	163603170	AmnSINE1	+	SINE/5S-Deu-L2	AmnSINE1	18.191	0.530022	34.3212	2.37482e-07	Yes	0	ENSG00000112530	PACRG
chr5	139504654	139504792	Charlie4z	-	DNA/hAT-Charlie	Charlie4z	53.3	4.70437	11.3299	2.41032e-07	Yes	-730	ENSG00000182700	IGIP
chr5	702586	708616	LTR7B|HERVH-int|HERVH-int|HERVH-int|HERVH-int|HERVH-int|HERVH-int|LTR7B	+	LTR/ERV1	HERVH-int	107.212	10.2066	10.5042	2.47712e-07	Yes	1856	ENSG00000188818	ZDHHC11
chr7	64408385	64411174	HERVK9-int|MER9a3	+	LTR/ERVK	HERVK9-int	99.0931	6.8396	14.4881	2.48329e-07	Yes	17042	ENSG00000198039	ZNF273
chr10	91044477	91050644	LTR7|HERVH-int|HERVH-int|HERVH-int|HERVH-int|HERVH-int|LTR7	+	LTR/ERV1	HERVH-int	151.598	8.94501	16.9478	2.50188e-07	Yes	0	ENSG00000107798	LIPA
chr5	44742624	44743470	L1ME3A	+	LINE/L1	L1ME3A	52.333	5.38403	9.72004	2.51373e-07	Yes	-65558	ENSG00000112996	MRPS30
chr5	82880059	82880978	Charlie2b	-	DNA/hAT-Charlie	Charlie2b	3.44995	65.2521	-18.9139	2.53564e-07	Yes	1938	ENSG00000038427	VCAN
chrX	107834943	107835966	L2a	+	LINE/L2	L2a	17.663	0.497331	35.5155	2.53564e-07	Yes	0	ENSG00000188153	COL4A5
chr4	78086597	78086759	AluJb	-	SINE/Alu	AluJb	5.79944	40.8973	-7.05195	2.63007e-07	Yes	0	ENSG00000138764	CCNG2
chr10	49682941	49683982	L2c	+	LINE/L2	L2c	9.36104	0.432112	21.6635	2.67052e-07	Yes	0	ENSG00000128805	ARHGAP22
chr21	15246741	15249173	MSTA-int|MSTA|MSTA-int|MSTA|MSTA|MSTA-int|MSTA-int	-	LTR/ERVL-MaLR	MSTA-int	9.00911	0.434575	20.7309	2.67052e-07	Yes	-193283	ENSG00000269011	AL050303.1
chr21	15253510	15255703	MSTA|MSTA-int|MSTA|MSTA|MSTA-int	-	LTR/ERVL-MaLR	MSTA-int	7.49954	0.394151	19.0271	2.68533e-07	Yes	-200052	ENSG00000269011	AL050303.1
chr9	113628937	113629396	MER4C	-	LTR/ERV1	MER4C	17.9014	0.671645	26.653	2.68533e-07	Yes	6148	ENSG00000198121	LPAR1
chr3	120892313	120893357	Tigger2b_Pri	-	DNA/TcMar-Tigger	Tigger2b_Pri	10.405	0.454789	22.8787	2.75245e-07	Yes	0	ENSG00000145087	STXBP5L
chr7	145694469	145694607	LFSINE_Vert	-	SINE/tRNA	LFSINE_Vert	16.4982	0.657289	25.1004	2.80037e-07	Yes	-118847	ENSG00000174469	CNTNAP2
chr7	130702930	130703756	L2a	+	LINE/L2	L2a	5.76845	0.392975	14.6789	2.83784e-07	Yes	-91100	ENSG00000128585	MKLN1
chr12	121627450	121627938	LTR53	+	LTR/ERVL	LTR53	24.3428	0.980398	24.8296	2.8863e-07	Yes	3575	ENSG00000089041	P2RX7
chr14	58578921	58579695	L1ME3D	-	LINE/L1	L1ME3D	0.859807	15.8085	-18.3861	2.88906e-07	Yes	0	ENSG00000139971	C14orf37
chr3	39548320	39548806	L2b	+	LINE/L2	L2b	11.0183	0.392471	28.0741	2.90618e-07	Yes	0	ENSG00000168314	MOBP
chr17	3395755	3396280	MLT1H	+	LTR/ERVL-MaLR	MLT1H	13.6072	0.39266	34.6539	2.9115e-07	Yes	0	ENSG00000141255	SPATA22
chr18	72254544	72255265	L2b	+	LINE/L2	L2b	29.2248	0.803639	36.3656	2.92123e-07	Yes	97	ENSG00000150656	CNDP1
chr1	45097006	45097247	L2d2	-	LINE/L2	L2d2	12.171	0.434309	28.0238	2.92513e-07	Yes	0	ENSG00000187147	RNF220
chrX	111865142	111865275	MLT1H	-	LTR/ERVL-MaLR	MLT1H	22.5719	0.697729	32.3506	2.93203e-07	Yes	8602	ENSG00000182508	LHFPL1
chr12	113829033	113829152	MIRb	+	SINE/MIR	MIRb	208.699	27.4378	7.60625	3.03234e-07	Yes	1099	ENSG00000135094	SDS
chr2	73279132	73279468	L1MC4	-	LINE/L1	L1MC4	12.2419	0.507498	24.122	3.06711e-07	Yes	0	ENSG00000144040	SFXN5
chr3	170141930	170142225	L2b	-	LINE/L2	L2b	17.7993	0.480626	37.0335	3.06711e-07	Yes	0	ENSG00000013297	CLDN11
chr7	107489567	107489872	AluJb	-	SINE/Alu	AluJb	7.70705	0.393635	19.5792	3.09113e-07	Yes	-41544	ENSG00000091140	DLD
chr11	1287758	1288536	THE1A-int|THE1A	-	LTR/ERVL-MaLR	THE1A-int	59.0098	5.87786	10.0393	3.31893e-07	Yes	4353	ENSG00000117983	MUC5B
chr16	83768693	83769019	Tigger18a	-	DNA/TcMar-Tigger	Tigger18a	9.21092	0.394419	23.3531	3.31893e-07	Yes	0	ENSG00000140945	CDH13
chr19	36880609	36881152	MER74B	+	LTR/ERVL	MER74B	7.07091	61.5187	-8.70025	3.33469e-07	Yes	0	ENSG00000181007	ZFP82
chr11	93916722	93916793	Charlie4z	-	DNA/hAT-Charlie	Charlie4z	12.6612	142.917	-11.2879	3.40004e-07	Yes	1585	ENSG00000110218	PANX1
chr1	247196922	247197370	MER70A	-	LTR/ERVL	MER70A	13.4883	76.0681	-5.63955	3.48369e-07	Yes	0	ENSG00000135747	ZNF670
chr3	46457904	46458462	MER50|MER50	-	LTR/ERV1	MER50	8.55439	0.392722	21.7823	3.50924e-07	Yes	3417	ENSG00000121797	CCRL2
chr1	201861751	201861852	MIRb	+	SINE/MIR	MIRb	41.0173	3.8191	10.7401	3.55139e-07	Yes	318	ENSG00000198892	SHISA4
chr3	72262743	72263218	MLT1D	-	LTR/ERVL-MaLR	MLT1D	8.70199	0.43602	19.9578	3.55139e-07	Yes	157759	ENSG00000163602	RYBP
chr1	35329859	35330110	L2c	+	LINE/L2	L2c	130.769	17.4019	7.51463	3.71259e-07	Yes	928	ENSG00000116544	DLGAP3
chr6	33375207	33375720	L1MC5a	-	LINE/L1	L1MC5a	0.836448	26.594	-31.794	3.71259e-07	Yes	0	ENSG00000237649	KIFC1
chr9	124063623	124063933	AluSx	+	SINE/Alu	AluSx	14.8293	0.532588	27.8439	3.71259e-07	Yes	0	ENSG00000148180	GSN
chr1	32139164	32139388	MIRb	-	SINE/MIR	MIRb	15.5574	0.432146	36.0004	3.77427e-07	Yes	0	ENSG00000084636	COL16A1
chr1	205483840	205484225	L2b	-	LINE/L2	L2b	7.69331	0.392926	19.5795	3.78818e-07	Yes	0	ENSG00000117266	CDK18
chr5	148361749	148362308	L1ME4b	+	LINE/L1	L1ME4b	12.3659	0.436039	28.3595	3.84492e-07	Yes	0	ENSG00000169247	SH3TC2
chr15	42697219	42697434	Charlie8	-	DNA/hAT-Charlie	Charlie8	13.7653	0.434204	31.7024	3.89287e-07	Yes	0	ENSG00000092529	CAPN3
chr3	133490986	133491060	L2b	+	LINE/L2	L2b	9.11737	0.393612	23.1633	3.89287e-07	Yes	0	ENSG00000091513	TF
chr6	160337238	160337550	L1MB3	+	LINE/L1	L1MB3	18.0011	0.577368	31.1778	3.89287e-07	Yes	8131	ENSG00000130368	MAS1
chr14	105122368	105122752	L2	-	LINE/L2	L2	5.15531	0.393763	13.0924	3.89391e-07	Yes	-33192	ENSG00000203485	INF2
chr11	29996294	29998877	HERVH-int|HERVH-int|HERVH-int	+	LTR/ERV1	HERVH-int	16.0333	0.7143	22.4461	3.9232e-07	Yes	32412	ENSG00000182255	KCNA4
chr1	201869952	201870215	L3b	+	LINE/CR1	L3b	19.335	0.613158	31.5335	4.06995e-07	Yes	0	ENSG00000163431	LMOD1
chr1	226028206	226028433	LTR37A	-	LTR/ERV1	LTR37A	25.5318	0.888091	28.749	4.06995e-07	Yes	0	ENSG00000143819	EPHX1
chr10	96362956	96363575	L2	+	LINE/L2	L2	0.534703	13.4787	-25.2078	4.15872e-07	Yes	0	ENSG00000119969	HELLS
chr2	207419548	207420294	L2	+	LINE/L2	L2	20.7532	0.855275	24.265	4.15872e-07	Yes	0	ENSG00000114948	ADAM23
chr2	73275674	73275761	L1ME4a	+	LINE/L1	L1ME4a	8.40177	0.483161	17.3892	4.20103e-07	Yes	0	ENSG00000144040	SFXN5
chr7	63543278	63544295	L1PREC2	-	LINE/L1	L1PREC2	49.8906	2.62457	19.0091	4.23109e-07	Yes	4352	ENSG00000257482	ZNF727
chr14	62001922	62002477	L2b	-	LINE/L2	L2b	9.3795	0.43605	21.5102	4.44225e-07	Yes	0	ENSG00000027075	PRKCH
chr17	3401642	3401940	AluJo	-	SINE/Alu	AluJo	11.6796	0.393382	29.6901	4.53977e-07	Yes	0	ENSG00000141255	SPATA22
chr20	7943168	7943475	AluSx1	+	SINE/Alu	AluSx1	0.912959	18.1354	-19.8644	4.53977e-07	Yes	14521	ENSG00000125827	TMX4
chr4	159173990	159174231	L2b	+	LINE/L2	L2b	7.83079	0.39472	19.8389	4.56714e-07	Yes	0	ENSG00000164124	TMEM144
chr11	75139917	75140115	MIRb	-	SINE/MIR	MIRb	2.64539	32.2883	-12.2055	4.63032e-07	Yes	0	ENSG00000149243	KLHL35
chr15	92930788	92931257	MLT1J	+	LTR/ERVL-MaLR	MLT1J	0.535877	9.73584	-18.1681	4.63032e-07	Yes	-5802	ENSG00000140557	ST8SIA2
chr16	57915782	57916221	L1ME4b	+	LINE/L1	L1ME4b	40.7869	1.06425	38.3245	4.63032e-07	Yes	1283	ENSG00000070729	CNGB1
chr2	97574910	97576534	L3	-	LINE/CR1	L3	52.9161	3.00381	17.6163	4.63032e-07	Yes	0	ENSG00000168754	FAM178B
chr3	72262214	72262576	MSTA	-	LTR/ERVL-MaLR	MSTA	6.94751	0.394062	17.6305	4.63032e-07	Yes	158401	ENSG00000163602	RYBP
chr5	148379261	148379714	L2c	+	LINE/L2	L2c	17.5886	0.62723	28.0417	4.63032e-07	Yes	0	ENSG00000169247	SH3TC2
chr14	68034864	68035322	L1PA10	+	LINE/L1	L1PA10	51.2689	1.29851	39.4828	4.65803e-07	Yes	0	ENSG00000054690	PLEKHH1
chr5	138882528	138890961	LTR12|HERV9-int|HERV9-int|LTR12	+	LTR/ERV1	HERV9-int	26.2803	0.476563	55.1455	4.65803e-07	Yes	-15056	ENSG00000131508	UBE2D2
chr1	11703622	11703800	MIRb	+	SINE/MIR	MIRb	12.3464	0.527677	23.3976	4.65911e-07	Yes	4625	ENSG00000116661	FBXO2
chr2	2818652	2821802	L1PA5	-	LINE/L1	L1PA5	10.1729	0.456315	22.2936	4.7346e-07	Yes	370895	ENSG00000032389	TSSC1
chr2	42662465	42663546	L1MB7	+	LINE/L1	L1MB7	16.0957	0.555654	28.967	4.75273e-07	Yes	5612	ENSG00000171126	KCNG3
chr1	35175562	35176045	MLT1J	-	LTR/ERVL-MaLR	MLT1J	7.64549	0.393715	19.4188	4.75586e-07	Yes	2294	ENSG00000163866	SMIM12
chrX	120149554	120150575	L1ME2	+	LINE/L1	L1ME2	20.1207	0.996255	20.1963	4.79023e-07	Yes	-29913	ENSG00000236371	CT47A1
chr5	26868632	26868973	MER47B	-	DNA/TcMar-Tigger	MER47B	18.6316	0.687719	27.0918	4.90269e-07	Yes	11737	ENSG00000113100	CDH9
chr12	49310952	49311276	AluJr	+	SINE/Alu	AluJr	40.4916	4.13365	9.7956	4.97685e-07	Yes	0	ENSG00000272822	RP11-302B13.5
chr17	79349374	79349547	L1M5	+	LINE/L1	L1M5	15.5296	0.613147	25.3278	4.97685e-07	Yes	-19729	ENSG00000263053	RP11-1055B8.6
chr1	226029303	226029604	AluSx	-	SINE/Alu	AluSx	27.2304	0.990288	27.4974	4.98156e-07	Yes	0	ENSG00000143819	EPHX1
chr10	98106815	98107150	AluSq10	-	SINE/Alu	AluSq10	5.82557	0.395432	14.7322	5.10672e-07	Yes	0	ENSG00000197430	OPALIN
chr4	21729579	21730562	L2a	+	LINE/L2	L2a	7.54485	0.433806	17.3922	5.25842e-07	Yes	0	ENSG00000185774	KCNIP4
chr19	35800044	35800365	LTR42	-	LTR/ERVL	LTR42	9.43996	0.39328	24.0031	5.317e-07	Yes	0	ENSG00000105695	MAG
chr11	6641468	6641945	L2	+	LINE/L2	L2	0.963921	20.2071	-20.9634	5.36e-07	Yes	612	ENSG00000166341	DCHS1
chr12	49308894	49310409	SVA_D	-	Retroposon/SVA	SVA_D	46.1086	3.00123	15.3633	5.36e-07	Yes	0	ENSG00000272822	RP11-302B13.5
chr18	15183048	15183395	L1MEd	+	LINE/L1	L1MEd	7.09403	0.393887	18.0103	5.39416e-07	Yes	330312	ENSG00000180777	ANKRD30B
chr20	1669559	1669961	MSTA	-	LTR/ERVL-MaLR	MSTA	13.6373	0.580608	23.4879	5.39416e-07	Yes	-31135	ENSG00000089012	SIRPG
chr4	21460224	21462021	L2a	+	LINE/L2	L2a	14.354	0.504547	28.4493	5.39416e-07	Yes	0	ENSG00000185774	KCNIP4
chr6	136890032	136890942	MER4D	+	LTR/ERV1	MER4D	5.69026	0.392973	14.48	5.39416e-07	Yes	0	ENSG00000197442	MAP3K5
chr16	13885546	13886000	MLT1D	-	LTR/ERVL-MaLR	MLT1D	13.1472	0.501197	26.2316	5.4704e-07	Yes	-128015	ENSG00000175595	ERCC4
chrX	111865329	111866064	L1ME3Cz	-	LINE/L1	L1ME3Cz	33.0509	1.09657	30.1403	5.49231e-07	Yes	7813	ENSG00000182508	LHFPL1
chr1	153576559	153578015	HUERS-P3b-int|LTR9B	+	LTR/ERV1	HUERS-P3b-int	54.2952	2.75404	19.7148	5.5905e-07	Yes	1348	ENSG00000188643	S100A16
chr5	178510852	178511589	L1MEf	+	LINE/L1	L1MEf	18.0897	103.705	-5.7328	5.5905e-07	Yes	315	ENSG00000177932	ZNF354C
chr1	248842064	248842446	HAL1	+	LINE/L1	HAL1	6.82435	0.392947	17.3671	5.66235e-07	Yes	2183	ENSG00000189181	OR14I1
chr1	247197371	247197503	HERVL74-int	-	LTR/ERVL	HERVL74-int	3.67817	29.1119	-7.91479	5.66713e-07	Yes	0	ENSG00000135747	ZNF670
chr20	21479992	21480143	Charlie30a	+	DNA/hAT-Charlie	Charlie30a	12.4796	0.431466	28.9237	5.66713e-07	Yes	11506	ENSG00000125820	NKX2-2
chr1	151828279	151828865	LTR61	+	LTR/ERV1	LTR61	76.4372	6.20368	12.3213	5.74284e-07	Yes	-2107	ENSG00000196407	THEM5
chr1	44975646	44975923	AluJb	+	SINE/Alu	AluJb	8.59173	0.393089	21.857	5.76695e-07	Yes	0	ENSG00000187147	RNF220
chrX	56650420	56652448	L1PA8A	+	LINE/L1	L1PA8A	2.96628	33.3615	-11.2469	5.83766e-07	Yes	56978	ENSG00000188021	UBQLN2
chr5	148379794	148380168	MER113	+	DNA/hAT-Charlie	MER113	9.25292	0.475866	19.4444	5.84395e-07	Yes	0	ENSG00000169247	SH3TC2
chr1	236035620	236035949	MER39	-	LTR/ERV1	MER39	4.24703	0.395944	10.7263	5.92451e-07	Yes	0	ENSG00000143669	LYST
chr11	93915857	93915933	L2c	-	LINE/L2	L2c	11.4477	117.126	-10.2313	5.92451e-07	Yes	720	ENSG00000110218	PANX1
chr6	136659394	136659697	AluSz	-	SINE/Alu	AluSz	27.8884	0.915487	30.4629	6.0133e-07	Yes	4179	ENSG00000135525	MAP7
chr19	23284429	23284669	AluSg	-	SINE/Alu	AluSg	1.50486	27.9486	-18.5722	6.20445e-07	Yes	0	ENSG00000183850	ZNF730
chr9	124061614	124061704	MIR	+	SINE/MIR	MIR	11.405	0.392871	29.0299	6.21179e-07	Yes	0	ENSG00000148180	GSN
chr11	58649062	58650733	L1PA6	-	LINE/L1	L1PA6	6.16324	50.233	-8.15042	6.27872e-07	Yes	0	ENSG00000156689	GLYATL2
chr12	49311426	49311593	MIR3	-	SINE/MIR	MIR3	35.3877	3.67867	9.61971	6.27872e-07	Yes	0	ENSG00000272822	RP11-302B13.5
chr21	37476566	37481175	LTR10F|HERVIP10FH-int	+	LTR/ERV1	HERVIP10FH-int	9.86729	0.454693	21.701	6.28638e-07	Yes	-24880	ENSG00000185917	SETD4
chr16	5048844	5049323	Tigger17a	+	DNA/TcMar-Tigger	Tigger17a	6.0974	0.394113	15.4712	6.32171e-07	Yes	0	ENSG00000103184	SEC14L5
chr19	1385238	1385533	AluSp	+	SINE/Alu	AluSp	13.4791	0.582153	23.1539	6.32171e-07	Yes	0	ENSG00000115286	NDUFS7
chr11	75140425	75140576	L2b	+	LINE/L2	L2b	1.22573	22.5414	-18.3901	6.33426e-07	Yes	0	ENSG00000149243	KLHL35
chr18	14996280	14996587	AluJb	-	SINE/Alu	AluJb	12.841	0.528317	24.3054	6.35983e-07	Yes	143544	ENSG00000180777	ANKRD30B
chr4	17485587	17485877	AluSc	+	SINE/Alu	AluSc	60.763	9.70544	6.26071	6.35983e-07	Yes	0	ENSG00000151552	QDPR
chr2	8525184	8526362	L1PA7	-	LINE/L1	L1PA7	7.98025	0.436023	18.3024	6.45422e-07	Yes	-292614	ENSG00000115738	ID2
chr13	77464215	77464936	MER44C	+	DNA/TcMar-Tigger	MER44C	28.0658	1.56996	17.8767	6.46443e-07	Yes	-3676	ENSG00000178695	KCTD12
chr7	130733818	130734394	L2a	+	LINE/L2	L2a	7.1856	0.436018	16.48	6.48495e-07	Yes	-60462	ENSG00000128585	MKLN1
chr2	201269361	201269849	MLT1D	-	LTR/ERVL-MaLR	MLT1D	4.71437	0.395918	11.9075	6.62324e-07	Yes	0	ENSG00000196141	SPATS2L
chr2	71862907	71864902	L2a	-	LINE/L2	L2a	9.95358	0.503651	19.7629	6.62479e-07	Yes	0	ENSG00000135636	DYSF
chr15	90043620	90043799	AluJo	-	SINE/Alu	AluJo	1.0796	17.12	-15.8577	6.78694e-07	Yes	-3777	ENSG00000140519	RHCG
chr5	138891263	138891987	LTR12	+	LTR/ERV1	LTR12	12.574	0.436073	28.8346	6.80536e-07	Yes	-14030	ENSG00000131508	UBE2D2
chr11	124803545	124804036	L2	+	LINE/L2	L2	6.68847	0.392606	17.0361	6.81657e-07	Yes	0	ENSG00000165478	HEPACAM
chr20	37474256	37475174	L2	-	LINE/L2	L2	9.7792	0.482408	20.2716	6.81657e-07	Yes	0	ENSG00000101445	PPP1R16B
chr2	128406195	128406519	AluJb	+	SINE/Alu	AluJb	7.04913	0.433708	16.2531	6.97803e-07	Yes	0	ENSG00000072163	LIMS2
chr3	183537486	183537618	MIRb	+	SINE/MIR	MIRb	9.90885	0.454776	21.7884	6.99667e-07	Yes	0	ENSG00000180834	MAP6D1
chr17	72184322	72184652	MLT1E	-	LTR/ERVL-MaLR	MLT1E	10.3206	0.527663	19.5592	6.99872e-07	Yes	-15070	ENSG00000172809	RPL38
chr1	201861853	201862177	AluSx1	+	SINE/Alu	AluSx1	53.2143	7.20081	7.39005	7.0997e-07	Yes	420	ENSG00000198892	SHISA4
chr10	5015441	5015931	MLT1H	-	LTR/ERVL-MaLR	MLT1H	2.31975	23.4393	-10.1042	7.0997e-07	Yes	0	ENSG00000187134	AKR1C1
chr17	3399469	3399874	L2a	-	LINE/L2	L2a	11.5952	0.392678	29.5284	7.0997e-07	Yes	0	ENSG00000141255	SPATA22
chr3	120886335	120892170	L1PA7	+	LINE/L1	L1PA7	25.0942	1.34554	18.6499	7.17951e-07	Yes	0	ENSG00000145087	STXBP5L
chr20	37511351	37511690	L2b	-	LINE/L2	L2b	3.98921	0.395442	10.088	7.37038e-07	Yes	0	ENSG00000101445	PPP1R16B
chr10	1182856	1183381	L1ME1	-	LINE/L1	L1ME1	144.235	21.7245	6.63928	7.52664e-07	Yes	4620	ENSG00000047056	WDR37
chr18	72812107	72814472	MSTB|MSTB-int|MSTB	-	LTR/ERVL-MaLR	MSTB-int	7.36339	0.392954	18.7385	7.6028e-07	Yes	34481	ENSG00000215421	ZNF407
chr10	81908835	81909637	L1MB5	-	LINE/L1	L1MB5	13.5496	0.587155	23.0767	7.62967e-07	Yes	1009	ENSG00000122359	ANXA11
chr5	150035529	150035757	MIR	-	SINE/MIR	MIR	9.11699	0.4542	20.0726	7.63313e-07	Yes	0	ENSG00000171992	SYNPO
chr6	26173565	26173919	L1M5	-	LINE/L1	L1M5	9.14972	83.2115	-9.09443	7.63313e-07	Yes	1989	ENSG00000158373	HIST1H2BD
chr19	47150364	47150658	AluJb	-	SINE/Alu	AluJb	45.8343	4.70742	9.7366	7.65567e-07	Yes	212	ENSG00000197380	DACT3
chr17	36702405	36702605	MIRb	-	SINE/MIR	MIRb	5.00851	0.395218	12.6728	7.74443e-07	Yes	0	ENSG00000017373	SRCIN1
chr4	57197421	57203548	L1PA3	-	LINE/L1	L1PA3	17.3903	96.3016	-5.53765	7.76445e-07	Yes	909	ENSG00000157426	AASDH
chr5	148371708	148371860	MIR	-	SINE/MIR	MIR	7.6459	0.434091	17.6136	7.81582e-07	Yes	0	ENSG00000169247	SH3TC2
chr11	33727022	33727343	MLT2B3	+	LTR/ERVL	MLT2B3	219.508	49.801	4.4077	7.81817e-07	Yes	0	ENSG00000085063	CD59
chr2	86726662	86728975	MSTA|MSTA-int|MSTA	-	LTR/ERVL-MaLR	MSTA-int	1793.86	590.987	3.03536	7.81817e-07	Yes	1580	ENSG00000115561	CHMP3
chr15	90050119	90050428	AluSg4	+	SINE/Alu	AluSg4	1.61212	24.2332	-15.0319	7.83921e-07	Yes	-10276	ENSG00000140519	RHCG
chr11	61540475	61540759	AluSg	-	SINE/Alu	AluSg	8.79825	0.433848	20.2796	7.91742e-07	Yes	0	ENSG00000124920	MYRF
chr17	26929916	26930207	AluSg	-	SINE/Alu	AluSg	28.2065	2.7531	10.2454	7.98649e-07	Yes	0	ENSG00000258472	RP11-192H23.4
chr5	146267545	146268679	L2a	+	LINE/L2	L2a	5.40595	0.392813	13.7622	8.02493e-07	Yes	0	ENSG00000156475	PPP2R2B
chr1	226030759	226030878	L2a	+	LINE/L2	L2a	23.1524	0.800639	28.9174	8.03576e-07	Yes	0	ENSG00000143819	EPHX1
chr1	247199673	247199971	AluJr	+	SINE/Alu	AluJr	1.99978	34.4637	-17.2338	8.03576e-07	Yes	0	ENSG00000135747	ZNF670
chr1	205427219	205427635	L2b	-	LINE/L2	L2b	1.14289	20.8581	-18.2504	8.03755e-07	Yes	-2138	ENSG00000186007	LEMD1
chr13	114800157	114800383	L1MC	+	LINE/L1	L1MC	11.8303	0.465234	25.4286	8.14875e-07	Yes	0	ENSG00000185989	RASA3
chr15	65343173	65343481	AluSx	-	SINE/Alu	AluSx	5.74161	0.394021	14.5718	8.17637e-07	Yes	0	ENSG00000186198	SLC51B
chr14	58580195	58580959	L1ME3D	-	LINE/L1	L1ME3D	1.69511	22.7237	-13.4055	8.31501e-07	Yes	0	ENSG00000139971	C14orf37
chr1	162420620	162421468	SVA_A	-	Retroposon/SVA	SVA_A	8.34983	0.470349	17.7524	8.42846e-07	Yes	-38693	ENSG00000198574	SH2D1B
chr9	95569182	95569421	L1MC	+	LINE/L1	L1MC	21.7948	1.00983	21.5826	8.43933e-07	Yes	38454	ENSG00000127081	ZNF484
chr9	124057183	124057292	MIRb	-	SINE/MIR	MIRb	8.75842	0.393947	22.2325	8.51903e-07	Yes	0	ENSG00000148180	GSN
chr10	3274581	3274683	MIR3	-	SINE/MIR	MIR3	12.2138	0.684404	17.8459	8.56051e-07	Yes	-59579	ENSG00000107959	PITRM1
chr1	110137269	110137557	AluY	-	SINE/Alu	AluY	6.48924	41.3653	-6.37445	8.59534e-07	Yes	295	ENSG00000065135	GNAI3
chr6	3229776	3229888	MIR3	-	SINE/MIR	MIR3	3.18997	32.5739	-10.2113	8.62229e-07	Yes	0	ENSG00000137285	TUBB2B
chr1	112222731	112223216	LTR12B	-	LTR/ERV1	LTR12B	18.3456	0.899086	20.4047	8.7004e-07	Yes	0	ENSG00000116473	RAP1A
chr21	45867842	45868146	AluSz	+	SINE/Alu	AluSz	11.025	0.529829	20.8086	8.7004e-07	Yes	4879	ENSG00000142185	TRPM2
chr4	154557996	154558235	AluSx	-	SINE/Alu	AluSx	1.17935	17.3234	-14.689	8.7004e-07	Yes	134	ENSG00000121210	KIAA0922
chr10	91090718	91090909	LTR24B	-	LTR/ERV1	LTR24B	34.917	1.48684	23.4841	8.80376e-07	Yes	0	ENSG00000107798	LIPA
chr9	131190395	131190555	MIR3	-	SINE/MIR	MIR3	13.7406	0.530417	25.9053	8.80376e-07	Yes	0	ENSG00000167123	CERCAM
chr1	35329274	35329401	MIR	+	SINE/MIR	MIR	56.1076	6.7611	8.29859	8.84867e-07	Yes	1637	ENSG00000116544	DLGAP3
chr11	64456284	64456427	L2d2	+	LINE/L2	L2d2	9.3439	0.501923	18.6162	8.96598e-07	Yes	0	ENSG00000110076	NRXN2
chr20	1868248	1869047	L2a	-	LINE/L2	L2a	26.0946	1.0694	24.4012	9.03799e-07	Yes	-6108	ENSG00000198053	SIRPA
chr7	106296415	106296655	MIR	-	SINE/MIR	MIR	0.733111	11.1449	-15.2022	9.03799e-07	Yes	557	ENSG00000253276	CCDC71L
chr21	48007758	48011149	L1PB1	+	LINE/L1	L1PB1	68.6721	4.94619	13.8838	9.04504e-07	Yes	7727	ENSG00000160307	S100B
chr6	157623879	157624167	L3	+	LINE/CR1	L3	12.0694	0.488568	24.7036	9.04504e-07	Yes	86252	ENSG00000215712	TMEM242
chr8	107597769	107599696	L2a	-	LINE/L2	L2a	11.1131	0.468592	23.716	9.1667e-07	Yes	0	ENSG00000164830	OXR1
chr10	91093535	91093678	MER5A1	+	DNA/hAT-Charlie	MER5A1	38.5816	3.54145	10.8943	9.2516e-07	Yes	0	ENSG00000107798	LIPA
chr11	1288681	1289131	L1MEi	+	LINE/L1	L1MEi	45.34	4.9802	9.10405	9.2516e-07	Yes	5276	ENSG00000117983	MUC5B
chr4	185008084	185008784	L1PA8	-	LINE/L1	L1PA8	10.9886	0.525167	20.9239	9.2516e-07	Yes	1076	ENSG00000164303	ENPP6
chr2	127809379	127809580	MIRb	+	SINE/MIR	MIRb	44.5449	2.97104	14.993	9.42418e-07	Yes	0	ENSG00000136717	BIN1
chr6	127831949	127832464	MLT1C	+	LTR/ERVL-MaLR	MLT1C	13.0451	61.8821	-4.74371	9.42418e-07	Yes	0	ENSG00000255330	SOGA3
chr20	45072265	45072727	LTR75_1	+	LTR/ERV1	LTR75_1	28.2228	2.18027	12.9447	9.54198e-07	Yes	-10562	ENSG00000062598	ELMO2
chr4	79609290	79609804	L1ME3A	+	LINE/L1	L1ME3A	10.5556	0.47812	22.0773	9.57072e-07	Yes	77694	ENSG00000138772	ANXA3
chr1	159968914	159969410	LTR85c	-	LTR/Gypsy?	LTR85c	25.3387	1.38764	18.2603	9.62908e-07	Yes	28053	ENSG00000143315	PIGM
chr20	1790351	1791337	L2a	+	LINE/L2	L2a	4.27507	0.393424	10.8663	9.62908e-07	Yes	-83818	ENSG00000198053	SIRPA
chr10	96364409	96364842	HAL1	-	LINE/L1	HAL1	0.535764	11.094	-20.7068	1.01181e-06	Yes	0	ENSG00000119969	HELLS
chr17	57280191	57280407	AluJr	+	SINE/Alu	AluJr	2.34373	21.9482	-9.36465	1.01181e-06	Yes	0	ENSG00000068489	PRR11
chrX	101761967	101762379	LTR57	-	LTR/ERVL	LTR57	0.540721	8.04012	-14.8693	1.01181e-06	Yes	6226	ENSG00000158164	TMSB15A
chr15	90050431	90050853	Tigger2	+	DNA/TcMar-Tigger	Tigger2	3.20015	28.7606	-8.98726	1.0239e-06	Yes	-10588	ENSG00000140519	RHCG
chr18	14994009	14994286	AluYk2	+	SINE/Alu	AluYk2	4.13079	0.394956	10.4589	1.03297e-06	Yes	141273	ENSG00000180777	ANKRD30B
chr18	72256152	72256341	MamTip2b	-	DNA/hAT-Tip100	MamTip2b	11.4678	0.456239	25.1355	1.03297e-06	Yes	1705	ENSG00000150656	CNDP1
chr20	52570467	52570930	MLT1K|MLT1K	+	LTR/ERVL-MaLR	MLT1K	16.4982	0.534627	30.8592	1.03297e-06	Yes	0	ENSG00000064787	BCAS1
chr22	31365837	31365957	MIR1_Amn	+	SINE/MIR	MIR1_Amn	7.88303	54.6997	-6.93892	1.03297e-06	Yes	-1554	ENSG00000133422	MORC2
chr1	17195916	17196422	L1ME2	-	LINE/L1	L1ME2	0.91335	15.047	-16.4745	1.04397e-06	Yes	0	ENSG00000058453	CROCC
chr1	213128059	213128232	L3	-	LINE/CR1	L3	1.24939	17.4423	-13.9606	1.04397e-06	Yes	0	ENSG00000143494	VASH2
chr11	124612550	124612696	MIRb	+	SINE/MIR	MIRb	5.27953	0.39496	13.3673	1.04397e-06	Yes	0	ENSG00000154146	NRGN
chr19	53016702	53016999	AluY	+	SINE/Alu	AluY	4.19368	28.5705	-6.81274	1.04397e-06	Yes	1296	ENSG00000258405	ZNF578
chr2	2836975	2837269	MLT1B	-	LTR/ERVL-MaLR	MLT1B	16.2785	0.580234	28.0551	1.04397e-06	Yes	355428	ENSG00000032389	TSSC1
chr3	63807120	63807643	L1MD1	+	LINE/L1	L1MD1	27.9412	2.80142	9.97393	1.04397e-06	Yes	0	ENSG00000163632	C3orf49
chr15	91848396	91848651	LTR88a	+	LTR/Gypsy?	LTR88a	5.97147	0.392821	15.2015	1.04693e-06	Yes	3858	ENSG00000185518	SV2B
chr9	120479515	120479855	MER44A	-	DNA/TcMar-Tigger	MER44A	26.3691	2.6319	10.019	1.04693e-06	Yes	367	ENSG00000136869	TLR4
chr1	226030855	226031106	L2c	-	LINE/L2	L2c	34.3007	1.1879	28.8752	1.06137e-06	Yes	0	ENSG00000143819	EPHX1
chr1	1358153	1358754	MER41B	+	LTR/ERV1	MER41B	27.1531	2.50551	10.8373	1.06487e-06	Yes	-1005	ENSG00000235098	ANKRD65
chr6	29636524	29636702	Charlie4a	-	DNA/hAT-Charlie	Charlie4a	20.1202	0.392224	51.2977	1.06487e-06	Yes	0	ENSG00000204655	MOG
chr18	72256353	72256578	Charlie8	+	DNA/hAT-Charlie	Charlie8	18.5168	0.673155	27.5075	1.07595e-06	Yes	1906	ENSG00000150656	CNDP1
chr17	46026106	46026239	Tigger19a	-	DNA/TcMar-Tigger	Tigger19a	106.311	16.5831	6.4108	1.08436e-06	Yes	453	ENSG00000108439	PNPO
chr4	17504294	17505288	L1MC5a	+	LINE/L1	L1MC5a	17.842	0.781411	22.8331	1.09318e-06	Yes	0	ENSG00000151552	QDPR
chr15	79473050	79474026	Arthur1	+	DNA/hAT-Tip100	Arthur1	6.29202	0.436015	14.4307	1.11184e-06	Yes	-89936	ENSG00000058335	RASGRF1
chr21	22148898	22154158	MER61-int|MER61-int|MER61D|MER61-int|MER61-int	-	LTR/ERV1	MER61-int	14.2199	0.553193	25.7052	1.12337e-06	Yes	-216476	ENSG00000154654	NCAM2
chr1	35330290	35330448	MIRb	+	SINE/MIR	MIRb	90.9713	10.8204	8.40736	1.1325e-06	Yes	590	ENSG00000116544	DLGAP3
chr7	78612968	78614259	L2a	+	LINE/L2	L2a	8.27589	0.482123	17.1655	1.1484e-06	Yes	0	ENSG00000187391	MAGI2
chrX	101976890	101977734	MER21C	-	LTR/ERVL	MER21C	4.97006	31.2565	-6.28895	1.1493e-06	Yes	0	ENSG00000198908	BHLHB9
chr20	58199806	58200163	L1MC3	-	LINE/L1	L1MC3	13.8643	0.598907	23.1493	1.15157e-06	Yes	0	ENSG00000087495	PHACTR3
chr17	72242381	72242613	MIR	+	SINE/MIR	MIR	18.8912	0.673713	28.0405	1.16707e-06	Yes	0	ENSG00000141540	TTYH2
chr11	50167205	50168028	LTR8B	+	LTR/ERV1	LTR8B	4.72175	0.395944	11.9253	1.17159e-06	Yes	-163135	ENSG00000221954	OR4C12
chr6	31034380	31035833	SVA_C	-	Retroposon/SVA	SVA_C	121.81	23.6807	5.14386	1.17352e-06	Yes	31202	ENSG00000261272	MUC22
chr17	9796541	9797523	L1MB3	-	LINE/L1	L1MB3	8.06557	0.394779	20.4306	1.17737e-06	Yes	1123	ENSG00000065325	GLP2R
chr5	139391965	139392988	L2a	+	LINE/L2	L2a	4.7709	0.393492	12.1245	1.17737e-06	Yes	0	ENSG00000158458	NRG2
chr15	101612692	101618498	LTR7|HERVH-int|HERVH-int|HERVH-int|HERVH-int|HERVH-int|HERVH-int|LTR7	+	LTR/ERV1	HERVH-int	39.0961	2.24262	17.4332	1.18433e-06	Yes	2376	ENSG00000154237	LRRK1
chr19	55794120	55794392	AluJr	-	SINE/Alu	AluJr	9.04727	0.455615	19.8573	1.19711e-06	Yes	0	ENSG00000160469	BRSK1
chr1	247262952	247263181	AluSc5	-	SINE/Alu	AluSc5	10.7711	56.8401	-5.27708	1.20499e-06	Yes	84	ENSG00000188295	ZNF669
chr9	131201635	131201948	L2a	-	LINE/L2	L2a	25.2755	1.51095	16.7282	1.20701e-06	Yes	2010	ENSG00000167123	CERCAM
chr10	105042131	105042543	Tigger15a	+	DNA/TcMar-Tigger	Tigger15a	3.09627	25.8796	-8.35833	1.21441e-06	Yes	0	ENSG00000148798	INA
chr22	28319002	28319316	AluSq2	-	SINE/Alu	AluSq2	9.42685	47.8186	-5.07259	1.22707e-06	Yes	-2881	ENSG00000180957	PITPNB
chr6	32869298	32869773	L1MC2	+	LINE/L1	L1MC2	50.7232	214.634	-4.23148	1.22707e-06	Yes	32634	ENSG00000242574	HLA-DMB
chr6	32869114	32869297	MER20	-	DNA/hAT-Charlie	MER20	11.22	54.6	-4.86629	1.23189e-06	Yes	33110	ENSG00000242574	HLA-DMB
chr16	72490165	72492872	L1MA10	-	LINE/L1	L1MA10	13.633	83.6597	-6.13654	1.23641e-06	Yes	-279389	ENSG00000118557	PMFBP1
chr4	40166234	40166385	Tigger19b	+	DNA/TcMar-Tigger	Tigger19b	1.43868	17.2787	-12.0101	1.24404e-06	Yes	6363	ENSG00000078177	N4BP2
chr1	35329512	35329614	MER5A	-	DNA/hAT-Charlie	MER5A	42.4672	6.35756	6.6798	1.24585e-06	Yes	1424	ENSG00000116544	DLGAP3
chr4	159201393	159201504	L2d2	+	LINE/L2	L2d2	21.0368	0.994907	21.1445	1.24893e-06	Yes	24831	ENSG00000164124	TMEM144
chr2	2827876	2828774	MLT1B-int|MLT1B	-	LTR/ERVL-MaLR	MLT1B-int	15.0384	0.718594	20.9275	1.27362e-06	Yes	363923	ENSG00000032389	TSSC1
chr11	85401745	85402192	L2b	-	LINE/L2	L2b	4.80043	0.394698	12.1623	1.2769e-06	Yes	3076	ENSG00000137501	SYTL2
chr2	31497893	31498289	LTR16A	+	LTR/ERVL	LTR16A	38.7318	3.68746	10.5037	1.2769e-06	Yes	5581	ENSG00000013016	EHD3
chr5	83965081	83967447	MSTA|MSTA-int|MSTA	+	LTR/ERVL-MaLR	MSTA-int	15.7982	0.583895	27.0567	1.28605e-06	Yes	-284471	ENSG00000164176	EDIL3
chr11	122942177	122942443	AluSx1	+	SINE/Alu	AluSx1	7.52168	64.6762	-8.59864	1.30655e-06	Yes	593	ENSG00000166250	CLMP
chr13	101873767	101878834	HERVFH19-int|LTR19A	+	LTR/ERV1	HERVFH19-int	10.589	0.521971	20.2866	1.30832e-06	Yes	0	ENSG00000102452	NALCN
chr10	96362610	96362905	L2	+	LINE/L2	L2	0.939047	15.3132	-16.3072	1.31183e-06	Yes	0	ENSG00000119969	HELLS
chr21	15237044	15237814	MSTA|MSTA-int|MSTA|MSTA|MSTA-int	-	LTR/ERVL-MaLR	MSTA-int	5.78743	0.394962	14.6531	1.31183e-06	Yes	-183586	ENSG00000269011	AL050303.1
chr1	55178180	55178388	L2b	-	LINE/L2	L2b	12.3148	0.533915	23.065	1.31594e-06	Yes	0	ENSG00000271723	MROH7-TTC4
chr3	42824273	42824799	L1M7	+	LINE/L1	L1M7	57.9752	6.79966	8.5262	1.32906e-06	Yes	0	ENSG00000181061	HIGD1A
chr3	72263332	72264140	L2a	+	LINE/L2	L2a	9.29916	0.482048	19.291	1.32906e-06	Yes	156837	ENSG00000163602	RYBP
chr6	26174621	26174800	FAM	+	SINE/Alu	FAM	6.15391	100.703	-16.3641	1.32906e-06	Yes	3045	ENSG00000158373	HIST1H2BD
chr11	124794246	124794465	MIR	+	SINE/MIR	MIR	20.2936	1.1133	18.2283	1.34513e-06	Yes	0	ENSG00000165478	HEPACAM
chr12	99140642	99141975	L1MA4	+	LINE/L1	L1MA4	77.4677	7.60007	10.193	1.34513e-06	Yes	0	ENSG00000185046	ANKS1B
chr12	121104304	121104576	L2b	-	LINE/L2	L2b	7.19993	0.455297	15.8137	1.34513e-06	Yes	0	ENSG00000157782	CABP1
chr16	14100903	14101941	L1MB7	-	LINE/L1	L1MB7	7.43016	0.433124	17.1548	1.34513e-06	Yes	54702	ENSG00000175595	ERCC4
chr9	138686998	138687318	AluJb	+	SINE/Alu	AluJb	8.89526	0.47872	18.5814	1.34513e-06	Yes	2007	ENSG00000107147	KCNT1
chr2	200522956	200523524	L1ME1	+	LINE/L1	L1ME1	17.6224	0.762325	23.1166	1.34687e-06	Yes	101744	ENSG00000226124	FTCDNL1
chr5	109184134	109185927	L2a	+	LINE/L2	L2a	17.2639	0.638433	27.041	1.348e-06	Yes	0	ENSG00000112893	MAN2A1
chr10	100217049	100217235	MIR	+	SINE/MIR	MIR	10.7242	0.559577	19.1648	1.36109e-06	Yes	1641	ENSG00000172987	HPSE2
chr5	63909403	63910170	L1ME4a	+	LINE/L1	L1ME4a	444.535	52.8739	8.40747	1.36386e-06	Yes	1265	ENSG00000186479	RGS7BP
chr3	127875294	127877653	Tigger1	+	DNA/TcMar-Tigger	Tigger1	1.53464	18.338	-11.9494	1.38195e-06	Yes	0	ENSG00000132394	EEFSEC
chr9	116123136	116123601	MER31A	+	LTR/ERV1	MER31A	6.69834	0.39288	17.0493	1.38809e-06	Yes	0	ENSG00000119411	BSPRY
chr7	85277047	85279334	THE1A|THE1A-int|THE1A	-	LTR/ERVL-MaLR	THE1A-int	9.51799	0.560375	16.985	1.40358e-06	Yes	-460877	ENSG00000153993	SEMA3D
chr2	201263797	201264202	L1MB1	-	LINE/L1	L1MB1	6.4085	0.438058	14.6294	1.40501e-06	Yes	0	ENSG00000196141	SPATS2L
chr7	130740412	130741069	L2	+	LINE/L2	L2	7.66491	0.45209	16.9544	1.41913e-06	Yes	-53787	ENSG00000128585	MKLN1
chr19	23286028	23286830	MER61-int	+	LTR/ERV1	MER61-int	1.41557	20.8095	-14.7004	1.4294e-06	Yes	0	ENSG00000183850	ZNF730
chr9	138598849	138598982	FLAM_C	+	SINE/Alu	FLAM_C	5.47532	0.434977	12.5876	1.4294e-06	Yes	0	ENSG00000107147	KCNT1
chr19	4044114	4044177	L2	+	LINE/L2	L2	56.892	3.82657	14.8676	1.44235e-06	Yes	186	ENSG00000178951	ZBTB7A
chr4	40162880	40163413	L1MC5	+	LINE/L1	L1MC5	1.5579	18.8274	-12.0851	1.44235e-06	Yes	3009	ENSG00000078177	N4BP2
chr14	29263318	29263599	AluJb	-	SINE/Alu	AluJb	11.492	73.5973	-6.40422	1.44867e-06	Yes	0	ENSG00000186960	C14orf23
chr17	6143862	6144751	L2b	+	LINE/L2	L2b	23.2736	1.40719	16.539	1.44888e-06	Yes	116116	ENSG00000179314	WSCD1
chr3	39547858	39548314	LTR16C	-	LTR/ERVL	LTR16C	10.1955	0.43256	23.5701	1.45594e-06	Yes	0	ENSG00000168314	MOBP
chr3	127381393	127382352	HAL1	-	LINE/L1	HAL1	3.2654	23.5804	-7.22128	1.45594e-06	Yes	0	ENSG00000114631	PODXL2
chr17	18570305	18570518	AluSp	-	SINE/Alu	AluSp	5.54419	30.5	-5.50126	1.46079e-06	Yes	0	ENSG00000249459	ZNF286B
chr15	51654711	51655400	L2a	-	LINE/L2	L2a	7.04888	0.393442	17.916	1.51774e-06	Yes	0	ENSG00000186417	GLDN
chr21	15306574	15309320	SVA_A	-	Retroposon/SVA	SVA_A	5.88558	0.394342	14.9251	1.52916e-06	Yes	171815	ENSG00000188992	LIPI
chr6	3253638	3255060	LTR12C	+	LTR/ERV1	LTR12C	3.43667	37.2022	-10.8251	1.52916e-06	Yes	0	ENSG00000180822	PSMG4
chr8	8172320	8172989	LTR62	+	LTR/ERVL	LTR62	3.48329	24.5551	-7.04942	1.52916e-06	Yes	2270	ENSG00000182319	SGK223
chr19	10405461	10405752	AluSx1	+	SINE/Alu	AluSx1	11.616	0.633904	18.3245	1.53698e-06	Yes	0	ENSG00000105376	ICAM5
chr17	72207876	72208284	L2a	+	LINE/L2	L2a	24.822	1.58193	15.6909	1.5461e-06	Yes	1083	ENSG00000172809	RPL38
chr17	72242822	72243040	THE1B	-	LTR/ERVL-MaLR	THE1B	15.1826	0.501694	30.2626	1.56379e-06	Yes	0	ENSG00000141540	TTYH2
chr7	4985208	4985505	AluSz	-	SINE/Alu	AluSz	7.85708	0.480455	16.3534	1.56379e-06	Yes	0	ENSG00000136297	MMD2
chr9	103213560	103214037	MARNA	-	DNA/TcMar-Mariner	MARNA	25.5524	118.552	-4.63957	1.56379e-06	Yes	0	ENSG00000251349	MSANTD3-TMEFF1
chr11	66065726	66066060	MLT1J	+	LTR/ERVL-MaLR	MLT1J	48.0967	6.13989	7.83347	1.56761e-06	Yes	1592	ENSG00000179292	TMEM151A
chr19	52616042	52616336	AluSz6	+	SINE/Alu	AluSz6	2.46809	17.398	-7.04917	1.56761e-06	Yes	9	ENSG00000204611	ZNF616
chr15	64656874	64657182	AluSx	-	SINE/Alu	AluSx	0.630173	12.4973	-19.8315	1.59495e-06	Yes	0	ENSG00000259316	CTD-2116N17.1
chr1	213126657	213126789	L3	-	LINE/CR1	L3	1.80421	22.3065	-12.3636	1.60569e-06	Yes	0	ENSG00000143494	VASH2
chr4	88396194	88396756	L2	+	LINE/L2	L2	14.5735	0.578651	25.1852	1.60569e-06	Yes	0	ENSG00000152583	SPARCL1
chr5	146390338	146390957	L2a	+	LINE/L2	L2a	5.64448	0.433235	13.0287	1.60789e-06	Yes	0	ENSG00000156475	PPP2R2B
chrX	111867747	111867904	L2	-	LINE/L2	L2	8.20628	0.482998	16.9903	1.62413e-06	Yes	5973	ENSG00000182508	LHFPL1
chr1	29195969	29196223	MIRc	-	SINE/MIR	MIRc	34.769	1.54407	22.5177	1.63249e-06	Yes	5762	ENSG00000116329	OPRD1
chr9	131190246	131190387	L2b	+	LINE/L2	L2b	12.3359	0.488804	25.2369	1.63283e-06	Yes	0	ENSG00000167123	CERCAM
chr19	13332381	13332670	L2a	+	LINE/L2	L2a	7.37068	0.477793	15.4265	1.64463e-06	Yes	0	ENSG00000141837	CACNA1A
chr20	25048715	25049950	L1MEd	+	LINE/L1	L1MEd	5.65558	0.434521	13.0157	1.65279e-06	Yes	1572	ENSG00000100987	VSX1
chr5	152104668	152107245	MER57A-int	+	LTR/ERV1	MER57A-int	8.46432	0.39484	21.4374	1.68836e-06	Yes	-291740	ENSG00000132911	NMUR2
chr15	64653576	64653863	AluJb	-	SINE/Alu	AluJb	0.736815	11.7935	-16.006	1.68972e-06	Yes	0	ENSG00000259316	CTD-2116N17.1
chr6	158521802	158522772	L1MC4	-	LINE/L1	L1MC4	23.131	1.30284	17.7543	1.75269e-06	Yes	1595	ENSG00000078269	SYNJ2
chr3	130834834	130840957	L1PA5	-	LINE/L1	L1PA5	3.71129	0.394882	9.39848	1.76648e-06	Yes	0	ENSG00000114670	NEK11
chrX	134225266	134225966	L1MB5	-	LINE/L1	L1MB5	34.9825	4.35498	8.03276	1.79354e-06	Yes	-39041	ENSG00000203950	FAM127B
chr10	98114571	98114883	AluSx	+	SINE/Alu	AluSx	8.4375	0.47946	17.5979	1.79509e-06	Yes	0	ENSG00000197430	OPALIN
chr4	21603065	21603594	L2a	+	LINE/L2	L2a	8.85627	0.504661	17.549	1.8083e-06	Yes	0	ENSG00000185774	KCNIP4
chr12	121067427	121067727	AluSx	-	SINE/Alu	AluSx	21.0372	1.5092	13.9393	1.81452e-06	Yes	-10629	ENSG00000157782	CABP1
chr14	101320163	101320303	L2c	+	LINE/L2	L2c	138.138	14.1789	9.74251	1.81821e-06	Yes	-24627	ENSG00000267918	AL117190.2
chr12	14651786	14652079	AluSq	-	SINE/Alu	AluSq	13.6546	104.65	-7.66406	1.8211e-06	Yes	90	ENSG00000171681	ATF7IP
chr19	55149007	55149576	L1M5	+	LINE/L1	L1M5	15.8311	0.736329	21.5	1.8211e-06	Yes	0	ENSG00000224730	AC009892.10
chr10	104968394	104971155	HERVH-int	+	LTR/ERV1	HERVH-int	5.99926	0.435176	13.7858	1.83479e-06	Yes	-15339	ENSG00000076685	NT5C2
chr19	19970348	19970653	AluSc	+	SINE/Alu	AluSc	0.628442	10.7723	-17.1413	1.83479e-06	Yes	-6043	ENSG00000256771	ZNF253
chr3	170535404	170541550	LTR7|HERVH-int|HERVH-int|HERVH-int|HERVH-int|LTR7	-	LTR/ERV1	HERVH-int	8.32078	0.432183	19.2529	1.85617e-06	Yes	0	ENSG00000013297	CLDN11
chr20	44849972	44850394	MLT1H	-	LTR/ERVL-MaLR	MLT1H	23.144	0.670385	34.5234	1.86523e-06	Yes	0	ENSG00000149654	CDH22
chr2	104693915	104695576	MER52A	-	LTR/ERV1	MER52A	1.33244	23.3187	-17.5008	1.8888e-06	Yes	-776394	ENSG00000198914	POU3F3
chr19	283447	284077	L1M4	+	LINE/L1	L1M4	8.71609	0.434707	20.0505	1.91207e-06	Yes	0	ENSG00000141934	PPAP2C
chr4	21922755	21924026	L2b	+	LINE/L2	L2b	17.8038	0.750332	23.7279	1.91741e-06	Yes	0	ENSG00000185774	KCNIP4
chr3	197754239	197754806	L1MB4	-	LINE/L1	L1MB4	4.48322	0.394935	11.3518	1.92416e-06	Yes	0	ENSG00000185621	LMLN
chr17	46025913	46026033	MER5A1	+	DNA/hAT-Charlie	MER5A1	78.4739	15.6468	5.01533	1.93789e-06	Yes	260	ENSG00000108439	PNPO
chr2	181933827	181934691	L2a	-	LINE/L2	L2a	7.45698	46.5556	-6.24323	1.9672e-06	Yes	0	ENSG00000170035	UBE2E3
chr10	88801415	88801658	L1M4	-	LINE/L1	L1M4	27.4707	1.18947	23.095	1.98123e-06	Yes	8586	ENSG00000148672	GLUD1
chr6	26173920	26174278	AluSz	-	SINE/Alu	AluSz	7.02361	72.7177	-10.3533	1.98293e-06	Yes	2344	ENSG00000158373	HIST1H2BD
chr7	86175781	86177727	L1P2	-	LINE/L1	L1P2	25.1288	1.36553	18.4022	1.99682e-06	Yes	-95504	ENSG00000198822	GRM3
chrX	28872186	28873053	L2c	-	LINE/L2	L2c	4.8374	0.392799	12.3152	2.01509e-06	Yes	0	ENSG00000169306	IL1RAPL1
chr2	201266548	201267365	L2c	+	LINE/L2	L2c	9.18418	0.479985	19.1343	2.0713e-06	Yes	0	ENSG00000196141	SPATS2L
chr3	50309037	50309342	L2b	-	LINE/L2	L2b	14.5227	0.587554	24.7172	2.0713e-06	Yes	-7117	ENSG00000179564	LSMEM2
chr10	81152763	81153268	L2b	+	LINE/L2	L2b	9.19834	0.500614	18.3741	2.07302e-06	Yes	0	ENSG00000165424	ZCCHC24
chr2	101998208	101998308	Charlie17a	+	DNA/hAT-Charlie	Charlie17a	41.5535	4.25876	9.75719	2.09974e-06	Yes	0	ENSG00000175874	CREG2
chr16	67206235	67206529	AluSx3	+	SINE/Alu	AluSx3	20.1704	0.870028	23.1836	2.12403e-06	Yes	0	ENSG00000140939	NOL3
chr9	131014660	131014790	L2d2	-	LINE/L2	L2d2	38.3131	1.93491	19.8009	2.18511e-06	Yes	0	ENSG00000106976	DNM1
chr4	5900119	5900295	MIRb	-	SINE/MIR	MIRb	89.3213	7.20589	12.3956	2.18704e-06	Yes	-5335	ENSG00000072832	CRMP1
chr1	247198498	247198800	LTR53	-	LTR/ERVL	LTR53	7.75032	45.8003	-5.90947	2.20763e-06	Yes	0	ENSG00000135747	ZNF670
chr19	50998035	50998073	L2d	+	LINE/L2	L2d	6.94153	0.435341	15.9451	2.20763e-06	Yes	11183	ENSG00000161677	JOSD2
chr6	46118726	46119822	L1MEg	+	LINE/L1	L1MEg	21.4336	2.42146	8.85151	2.20901e-06	Yes	4291	ENSG00000001561	ENPP4
chr1	17197035	17197280	MLT1A0	+	LTR/ERVL-MaLR	MLT1A0	0.983917	11.9984	-12.1945	2.22006e-06	Yes	0	ENSG00000058453	CROCC
chr1	230932790	230932938	MER5B	+	DNA/hAT-Charlie	MER5B	13.1502	0.605761	21.7086	2.22932e-06	Yes	0	ENSG00000135773	CAPN9
chr13	111373913	111374212	AluSc	-	SINE/Alu	AluSc	6.24592	35.0641	-5.61393	2.22932e-06	Yes	493	ENSG00000153487	ING1
chr17	66990317	66991742	L2	+	LINE/L2	L2	5.57416	0.393019	14.1829	2.24037e-06	Yes	0	ENSG00000154258	ABCA9
chr15	20634184	20634401	L1MEf	+	LINE/L1	L1MEf	9.86515	0.394405	25.0127	2.25011e-06	Yes	102694	ENSG00000215405	GOLGA6L6
chr22	28318689	28318991	AluY	-	SINE/Alu	AluY	1.88866	20.8821	-11.0566	2.2968e-06	Yes	-2568	ENSG00000180957	PITPNB
chr2	95884742	95885052	AluYk2	-	SINE/Alu	AluYk2	1.42951	17.4814	-12.2289	2.30741e-06	Yes	34678	ENSG00000163067	ZNF2
chr21	15237938	15239615	MSTA|MSTA-int	-	LTR/ERVL-MaLR	MSTA-int	5.82352	0.394681	14.755	2.31801e-06	Yes	-184480	ENSG00000269011	AL050303.1
chr6	33375868	33376125	L1MC5a	-	LINE/L1	L1MC5a	0.737384	13.9264	-18.8862	2.3184e-06	Yes	0	ENSG00000237649	KIFC1
chr1	1347632	1352150	LTR2B|Harlequin-int|Harlequin-int	-	LTR/ERV1	Harlequin-int	52.1507	7.36647	7.07947	2.33264e-06	Yes	1651	ENSG00000235098	ANKRD65
chr10	88802764	88803163	L1M4	-	LINE/L1	L1M4	33.3215	1.57941	21.0974	2.33264e-06	Yes	7081	ENSG00000148672	GLUD1
chrX	111872555	111872927	L2d2	+	LINE/L2	L2d2	8.33357	0.477187	17.4639	2.3541e-06	Yes	950	ENSG00000182508	LHFPL1
chr1	40117890	40118180	MER102b	+	DNA/hAT-Charlie	MER102b	24.6772	0.981156	25.1512	2.3634e-06	Yes	6614	ENSG00000116981	NT5C1A
chr1	248866515	248867058	L2a	+	LINE/L2	L2a	4.78743	0.435957	10.9814	2.3634e-06	Yes	-20887	ENSG00000189181	OR14I1
chr10	88800667	88800973	AluSc	-	SINE/Alu	AluSc	37.741	1.80712	20.8846	2.424e-06	Yes	9271	ENSG00000148672	GLUD1
chr11	49206446	49206636	MIR	+	SINE/MIR	MIR	17.7185	0.958349	18.4885	2.424e-06	Yes	0	ENSG00000086205	FOLH1
chr12	56390268	56390438	AluJr	-	SINE/Alu	AluJr	61.3498	10.7667	5.69811	2.424e-06	Yes	-527	ENSG00000139531	SUOX
chr13	42040534	42040825	AluSx	-	SINE/Alu	AluSx	14.4652	0.614878	23.5253	2.424e-06	Yes	0	ENSG00000102760	RGCC
chr3	48332884	48333174	AluJb	-	SINE/Alu	AluJb	10.5852	45.909	-4.33708	2.424e-06	Yes	0	ENSG00000164048	ZNF589
chr8	1709492	1709790	AluSz	-	SINE/Alu	AluSz	41.8498	8.0431	5.20319	2.424e-06	Yes	0	ENSG00000182372	CLN8
chr8	1709791	1710325	LTR8	-	LTR/ERV1	LTR8	59.637	12.6516	4.71378	2.424e-06	Yes	0	ENSG00000182372	CLN8
chrX	28910237	28916285	LTR7|HERVH-int|HERVH-int|HERVH-int|HERVH-int|HERVH-int|LTR7	-	LTR/ERV1	HERVH-int	59.0637	2.46954	23.9169	2.424e-06	Yes	0	ENSG00000169306	IL1RAPL1
chr18	72255454	72255771	Tigger3a	+	DNA/TcMar-Tigger	Tigger3a	16.3121	0.692583	23.5526	2.4355e-06	Yes	1007	ENSG00000150656	CNDP1
chr4	21771612	21778019	L1PA8A	-	LINE/L1	L1PA8A	16.7388	1.12167	14.9231	2.44636e-06	Yes	0	ENSG00000185774	KCNIP4
chr19	39996569	39996881	AluSx1	+	SINE/Alu	AluSx1	2.09929	19.3854	-9.23426	2.45936e-06	Yes	0	ENSG00000090932	DLL3
chrX	120150927	120151130	MER67C	-	LTR/ERV1	MER67C	8.15976	0.480953	16.9658	2.45936e-06	Yes	-30333	ENSG00000182890	GLUD2
chr19	19969410	19969678	AluSx	+	SINE/Alu	AluSx	0.728645	10.4072	-14.283	2.45993e-06	Yes	-7018	ENSG00000256771	ZNF253
chr20	47275109	47275484	L2a	-	LINE/L2	L2a	12.3927	0.572717	21.6385	2.45993e-06	Yes	0	ENSG00000124126	PREX1
chr7	26500380	26500752	MamRep605	+	LTR?	MamRep605	0.53966	6.99082	-12.9541	2.46246e-06	Yes	71989	ENSG00000122548	KIAA0087
chr1	24801219	24801522	AluSc	+	SINE/Alu	AluSc	32.5675	6.15793	5.28871	2.48035e-06	Yes	1754	ENSG00000001461	NIPAL3
chr21	15241349	15242884	MSTA-int	-	LTR/ERVL-MaLR	MSTA-int	4.90539	0.394438	12.4364	2.48035e-06	Yes	-187891	ENSG00000269011	AL050303.1
chr15	92989746	92990640	L2a	-	LINE/L2	L2a	0.728469	11.3221	-15.5424	2.48787e-06	Yes	0	ENSG00000140557	ST8SIA2
chr10	79147395	79147675	AluSx1	-	SINE/Alu	AluSx1	8.479	0.454729	18.6463	2.49544e-06	Yes	0	ENSG00000156113	KCNMA1
chr2	33069326	33071709	THE1B|THE1B-int|THE1B-int|THE1B	+	LTR/ERVL-MaLR	THE1B-int	18.7273	0.97886	19.1317	2.49544e-06	Yes	23209	ENSG00000018699	TTC27
chr17	76231197	76231371	MSTA	-	LTR/ERVL-MaLR	MSTA	9.87205	0.392882	25.1273	2.50476e-06	Yes	0	ENSG00000204278	TMEM235
chr10	119244212	119244413	MER103C	+	DNA/hAT-Charlie	MER103C	115.714	17.6489	6.55646	2.51456e-06	Yes	-57543	ENSG00000170370	EMX2
chr5	161429256	161429566	AluSq2	+	SINE/Alu	AluSq2	7.79546	0.485319	16.0626	2.51867e-06	Yes	-64981	ENSG00000113327	GABRG2
chr14	58579689	58580194	L1ME3A	-	LINE/L1	L1ME3A	2.37325	16.4169	-6.91746	2.56331e-06	Yes	0	ENSG00000139971	C14orf37
chr12	14652608	14652771	AluSp	+	SINE/Alu	AluSp	13.2209	92.8176	-7.02055	2.56767e-06	Yes	912	ENSG00000171681	ATF7IP
chr1	35329749	35329789	L2c	+	LINE/L2	L2c	56.7985	6.99175	8.12365	2.5695e-06	Yes	1249	ENSG00000116544	DLGAP3
chr17	72872497	72872643	MER20	+	DNA/hAT-Charlie	MER20	13.2242	0.676382	19.5514	2.5695e-06	Yes	786	ENSG00000172782	FADS6
chrX	111871598	111872119	LTR33	+	LTR/ERVL	LTR33	16.1719	0.68697	23.5409	2.58057e-06	Yes	1758	ENSG00000182508	LHFPL1
chr20	31074791	31075100	AluSq2	+	SINE/Alu	AluSq2	1.25705	18.3613	-14.6066	2.58636e-06	Yes	0	ENSG00000197183	C20orf112
chr21	15259870	15260774	MSTA-int|MSTA|MSTA-int|MSTA|MSTA|MSTA-int	-	LTR/ERVL-MaLR	MSTA-int	3.86903	0.395934	9.7719	2.61113e-06	Yes	-206412	ENSG00000269011	AL050303.1
chr6	3255981	3256690	HERV16-int	-	LTR/ERVL	HERV16-int	2.04506	23.4003	-11.4423	2.61753e-06	Yes	0	ENSG00000180822	PSMG4
chr2	127850754	127851382	MER39	+	LTR/ERV1	MER39	3.97298	0.395337	10.0496	2.61792e-06	Yes	0	ENSG00000136717	BIN1
chr1	46693199	46693605	L1MC5a	-	LINE/L1	L1MC5a	26.5072	1.01666	26.0729	2.62314e-06	Yes	6267	ENSG00000171357	LURAP1
chr16	5062919	5063223	THE1D	-	LTR/ERVL-MaLR	THE1D	8.18212	0.393402	20.7983	2.62314e-06	Yes	0	ENSG00000103184	SEC14L5
chr1	195718690	195719586	HAL1M8	-	LINE/L1	HAL1M8	5.58616	0.395823	14.1128	2.62869e-06	Yes	475324	ENSG00000162687	KCNT2
chrX	53298586	53299475	L2a	+	LINE/L2	L2a	7.72384	0.521322	14.8159	2.62869e-06	Yes	0	ENSG00000124313	IQSEC2
chrX	111866099	111866328	MLT1I	-	LTR/ERVL-MaLR	MLT1I	14.8076	0.850074	17.4191	2.64279e-06	Yes	7549	ENSG00000182508	LHFPL1
chr6	136661266	136661568	AluJr	-	SINE/Alu	AluJr	15.0707	0.8109	18.5851	2.66562e-06	Yes	2308	ENSG00000135525	MAP7
chr21	48002698	48003450	L1M4b	+	LINE/L1	L1M4b	36.9942	1.51122	24.4797	2.68356e-06	Yes	12773	ENSG00000160305	DIP2A
chr7	123636201	123636780	LTR9	-	LTR/ERV1	LTR9	3.65522	0.395285	9.24704	2.69057e-06	Yes	24734	ENSG00000106304	SPAM1
chr20	44027108	44028139	L1MCa	-	LINE/L1	L1MCa	21.0279	0.658886	31.9143	2.6951e-06	Yes	0	ENSG00000254806	SYS1-DBNDD2
chr15	65342662	65343052	L2a	-	LINE/L2	L2a	6.57953	0.432845	15.2006	2.69812e-06	Yes	0	ENSG00000186198	SLC51B
chr19	1386246	1386498	MLT1B	-	LTR/ERVL-MaLR	MLT1B	16.7979	0.689661	24.3567	2.71027e-06	Yes	0	ENSG00000115286	NDUFS7
chr14	68029908	68030101	MIR	+	SINE/MIR	MIR	19.1076	0.625861	30.5301	2.71458e-06	Yes	0	ENSG00000054690	PLEKHH1
chrX	101978511	101979188	MER21C	+	LTR/ERVL	MER21C	5.8503	30.0883	-5.14304	2.73333e-06	Yes	0	ENSG00000198908	BHLHB9
chr8	42979663	42980350	LTR76	-	LTR/ERV1	LTR76	43.5756	193.919	-4.45017	2.81587e-06	Yes	1087	ENSG00000185900	POMK
chr1	230934097	230934249	MIR	-	SINE/MIR	MIR	11.6526	0.638022	18.2637	2.81654e-06	Yes	0	ENSG00000135773	CAPN9
chr10	2647627	2648000	THE1C	-	LTR/ERVL-MaLR	THE1C	0.540415	12.2191	-22.6105	2.81654e-06	Yes	-460526	ENSG00000067057	PFKP
chr7	44872267	44872563	AluJb	+	SINE/Alu	AluJb	64.2337	282.825	-4.40307	2.81654e-06	Yes	0	ENSG00000105968	H2AFV
chr1	20016359	20017137	LTR28B	+	LTR/ERV1	LTR28B	4.81973	0.393995	12.233	2.81872e-06	Yes	0	ENSG00000162542	TMCO4
chr1	840949	841179	L1MB5	+	LINE/L1	L1MB5	1.1052	15.3287	-13.8696	2.82571e-06	Yes	-19082	ENSG00000187634	SAMD11
chr10	88801958	88802271	AluJb	-	SINE/Alu	AluJb	19.0065	1.12948	16.8277	2.82571e-06	Yes	7973	ENSG00000148672	GLUD1
chr12	123899681	123899819	MER104	+	DNA/TcMar-Tc2	MER104	20.984	1.99798	10.5026	2.82571e-06	Yes	118	ENSG00000150977	RILPL2
chr6	3253103	3253637	LTR16A|HERV16-int	-	LTR/ERVL	HERV16-int	1.23829	18.9033	-15.2657	2.82571e-06	Yes	0	ENSG00000180822	PSMG4
chr11	132923235	132924401	L2a	+	LINE/L2	L2a	4.53834	0.434432	10.4466	2.84307e-06	Yes	0	ENSG00000183715	OPCML
chr15	42699390	42699531	MIRc	-	SINE/MIR	MIRc	10.871	0.393568	27.6216	2.85379e-06	Yes	0	ENSG00000092529	CAPN3
chr10	96366494	96366897	HAL1	-	LINE/L1	HAL1	1.11721	16.4931	-14.7627	2.87777e-06	Yes	0	ENSG00000119969	HELLS
chr8	142595045	142595400	MER4A	+	LTR/ERV1	MER4A	5.51949	0.435653	12.6695	2.88249e-06	Yes	66209	ENSG00000226490	AC138647.1
chr19	46927861	46928556	Charlie15b	-	DNA/hAT-Charlie	Charlie15b	446.106	135.377	3.29529	2.90607e-06	Yes	-11021	ENSG00000169515	CCDC8
chr4	40164917	40165454	MLT1L	+	LTR/ERVL-MaLR	MLT1L	5.9905	36.4919	-6.09163	2.94151e-06	Yes	5046	ENSG00000078177	N4BP2
chr15	30240700	30241033	MLT1L	+	LTR/ERVL-MaLR	MLT1L	5.01494	0.434145	11.5513	2.94625e-06	Yes	0	ENSG00000104067	TJP1
chr2	95886794	95886957	MIRc	+	SINE/MIR	MIRc	4.09726	33.5458	-8.18736	2.9827e-06	Yes	36730	ENSG00000163067	ZNF2
chr10	88802506	88802763	AluJb	+	SINE/Alu	AluJb	19.9003	1.45419	13.6848	2.98389e-06	Yes	7481	ENSG00000148672	GLUD1
chr14	68033181	68033482	AluSz	+	SINE/Alu	AluSz	22.4049	0.798877	28.0455	2.98714e-06	Yes	0	ENSG00000054690	PLEKHH1
chr13	100147602	100149332	HERV4_I-int|MER51A|MER51A	-	LTR/ERV1	HERV4_I-int	29.9686	5.87023	5.10519	2.99075e-06	Yes	-4340	ENSG00000125304	TM9SF2
chr4	79607091	79607375	LTR16A2	-	LTR/ERVL	LTR16A2	7.36769	0.435979	16.8992	3.09786e-06	Yes	75495	ENSG00000138772	ANXA3
chr11	58813122	58813603	L1ME3G	-	LINE/L1	L1ME3G	0.537919	7.36439	-13.6905	3.11946e-06	Yes	2123	ENSG00000166840	GLYATL1
chr6	111919424	111919975	L1ME4b	+	LINE/L1	L1ME4b	16.189	71.1431	-4.39454	3.11946e-06	Yes	0	ENSG00000056972	TRAF3IP2
chrX	65477887	65478614	L2d	-	LINE/L2	L2d	17.1436	0.692758	24.7469	3.11946e-06	Yes	0	ENSG00000089472	HEPH
chr1	226028981	226029284	AluSx1	-	SINE/Alu	AluSx1	14.6434	0.635537	23.0409	3.12849e-06	Yes	0	ENSG00000143819	EPHX1
chr5	59844678	59846706	L1MA4A	+	LINE/L1	L1MA4A	7.95503	0.53159	14.9646	3.12849e-06	Yes	-26732	ENSG00000113448	PDE4D
chr9	139662581	139662880	L1ME1	+	LINE/L1	L1ME1	4.10376	0.395149	10.3853	3.14421e-06	Yes	-1875	ENSG00000177984	LCN15
chr1	230934522	230934676	MER5A1	+	DNA/hAT-Charlie	MER5A1	13.3481	0.642607	20.7718	3.18974e-06	Yes	0	ENSG00000135773	CAPN9
chr15	40353612	40355162	L2c	-	LINE/L2	L2c	98.5121	4.47445	22.0166	3.18974e-06	Yes	-22224	ENSG00000140319	SRP14
chr5	59846890	59847563	L1MB8	+	LINE/L1	L1MB8	6.40305	0.45583	14.047	3.18974e-06	Yes	-28944	ENSG00000113448	PDE4D
chr6	136662688	136663397	LTR82B	+	LTR/ERVL	LTR82B	22.6087	1.23914	18.2455	3.20139e-06	Yes	479	ENSG00000135525	MAP7
chr20	1915613	1915683	MER91C	-	DNA/hAT-Tip100	MER91C	5.85286	0.437704	13.3717	3.21963e-06	Yes	0	ENSG00000198053	SIRPA
chr1	112259443	112260484	L2a	-	LINE/L2	L2a	43.2354	2.05152	21.0748	3.25525e-06	Yes	0	ENSG00000197852	FAM212B
chr10	46968952	46969116	MIRb	+	SINE/MIR	MIRb	94.0021	12.9784	7.24296	3.26369e-06	Yes	0	ENSG00000204176	SYT15
chr18	72239741	72240054	AluJb	+	SINE/Alu	AluJb	7.99157	0.482926	16.5482	3.31132e-06	Yes	0	ENSG00000150656	CNDP1
chr8	143576775	143577216	MLT1C2	-	LTR/ERVL-MaLR	MLT1C2	9.5098	0.561018	16.951	3.31878e-06	Yes	0	ENSG00000181790	BAI1
chr9	114313675	114313981	AluSx	-	SINE/Alu	AluSx	77.8796	14.9237	5.21853	3.33111e-06	Yes	0	ENSG00000173258	ZNF483
chr20	25050550	25050946	MER57B2	-	LTR/ERV1	MER57B2	5.98836	0.455352	13.151	3.33435e-06	Yes	576	ENSG00000100987	VSX1
chr14	58578167	58578397	MLT1B	-	LTR/ERVL-MaLR	MLT1B	0.630683	8.35987	-13.2553	3.33835e-06	Yes	0	ENSG00000139971	C14orf37
chr10	64099649	64102479	MER41B|MER41-int	-	LTR/ERV1	MER41-int	46.9298	3.52759	13.3036	3.34641e-06	Yes	-31473	ENSG00000138311	ZNF365
chr8	89730743	89731181	L1P4	-	LINE/L1	L1P4	10.094	0.613743	16.4466	3.36825e-06	Yes	-390490	ENSG00000156103	MMP16
chr19	21630397	21631161	L1PA7	-	LINE/L1	L1PA7	2.06304	22.4329	-10.8737	3.37191e-06	Yes	0	ENSG00000269237	CTD-2561J22.3
chr17	79352182	79352472	AluSx1	-	SINE/Alu	AluSx1	12.3289	0.555435	22.1968	3.37429e-06	Yes	-16804	ENSG00000263053	RP11-1055B8.6
chr6	56920057	56921013	Charlie5	+	DNA/hAT-Charlie	Charlie5	21.0501	102.271	-4.85847	3.41808e-06	Yes	35	ENSG00000168116	KIAA1586
chr2	98958495	98959045	L3	-	LINE/CR1	L3	0.537613	7.78343	-14.4777	3.42455e-06	Yes	0	ENSG00000222000	AC092675.3
chr12	75427281	75431644	ERVL-B4-int|MLT2B1|MLT2B1	+	LTR/ERVL	ERVL-B4-int	4.46605	0.435142	10.2634	3.48624e-06	Yes	2214	ENSG00000166006	KCNC2
chr17	72871220	72871454	MIR	+	SINE/MIR	MIR	19.3606	1.07779	17.9632	3.48624e-06	Yes	1975	ENSG00000172782	FADS6
chr1	66754999	66755819	L2b	-	LINE/L2	L2b	6.15357	0.480625	12.8033	3.49362e-06	Yes	0	ENSG00000184588	PDE4B
chr17	49982912	49984877	L2a	+	LINE/L2	L2a	10.1325	0.52199	19.4113	3.49362e-06	Yes	0	ENSG00000154975	CA10
chr6	160332554	160333027	L2c	+	LINE/L2	L2c	11.7351	0.546802	21.4613	3.52304e-06	Yes	3447	ENSG00000130368	MAS1
chr1	151672835	151672924	L2a	-	LINE/L2	L2a	1.53299	17.0161	-11.1	3.55071e-06	Yes	1269	ENSG00000143376	SNX27
chr10	91093313	91093434	AluJo	+	SINE/Alu	AluJo	19.4405	1.69358	11.4789	3.55632e-06	Yes	0	ENSG00000107798	LIPA
chr20	3176270	3176926	L2	+	LINE/L2	L2	25.2986	0.974119	25.9708	3.57966e-06	Yes	0	ENSG00000198171	DDRGK1
chr3	16272402	16272833	L1PA8	+	LINE/L1	L1PA8	29.4158	3.03246	9.7003	3.57966e-06	Yes	0	ENSG00000131386	GALNT15
chr6	159064096	159064165	MIR3	-	SINE/MIR	MIR3	1.27135	15.0983	-11.8758	3.57966e-06	Yes	0	ENSG00000146425	DYNLT1
chr16	67207060	67207196	L2c	-	LINE/L2	L2c	12.1944	0.60907	20.0214	3.58267e-06	Yes	0	ENSG00000140939	NOL3
chr9	138602248	138602343	MIR1_Amn	+	SINE/MIR	MIR1_Amn	5.38259	0.395246	13.6183	3.60408e-06	Yes	0	ENSG00000107147	KCNT1
chr13	111373612	111373907	AluSp	-	SINE/Alu	AluSp	6.05005	33.949	-5.61136	3.60569e-06	Yes	192	ENSG00000153487	ING1
chr2	78192266	78197976	LTR7B|HERVH-int|HERVH-int|HERVH-int|HERVH-int|HERVH-int|HERVH-int|LTR7B	+	LTR/ERV1	HERVH-int	11.0282	0.59063	18.6719	3.61892e-06	Yes	-371822	ENSG00000176204	LRRTM4
chr11	116720986	116721416	L2d2	+	LINE/L2	L2d2	9.75148	0.531188	18.3579	3.68001e-06	Yes	0	ENSG00000160584	SIK3
chr6	3250653	3251206	L2	-	LINE/L2	L2	2.06792	22.4685	-10.8653	3.68001e-06	Yes	0	ENSG00000180822	PSMG4
chr6	170735656	170739842	MER65A|MER101-int|MER101-int	-	LTR/ERV1	MER101-int	35.2854	2.55582	13.8059	3.68001e-06	Yes	19504	ENSG00000112584	FAM120B
chr12	21430848	21434103	L1MA3	+	LINE/L1	L1MA3	8.96401	0.478833	18.7206	3.69375e-06	Yes	0	ENSG00000084453	SLCO1A2
chr2	86131951	86132284	AluJo	+	SINE/Alu	AluJo	11.258	0.712176	15.8079	3.69375e-06	Yes	-15815	ENSG00000115525	ST3GAL5
chr7	44872654	44872833	AluSz6	-	SINE/Alu	AluSz6	30.2169	125.092	-4.13981	3.69375e-06	Yes	0	ENSG00000105968	H2AFV
chr14	101316641	101316963	AluSg	+	SINE/Alu	AluSg	212.442	22.5498	9.42099	3.70841e-06	Yes	-21105	ENSG00000267918	AL117190.2
chr14	29264354	29264691	MLT1J2|MLT1J2	-	LTR/ERVL-MaLR	MLT1J2	7.28523	51.5632	-7.07777	3.77018e-06	Yes	0	ENSG00000186960	C14orf23
chr17	77116867	77118385	L2b	+	LINE/L2	L2b	3.65342	0.394898	9.25157	3.8109e-06	Yes	0	ENSG00000167281	RBFOX3
chr1	153578489	153578799	AluSp	+	SINE/Alu	AluSp	7.8307	0.590754	13.2554	3.81301e-06	Yes	564	ENSG00000188643	S100A16
chr7	94665378	94665494	MER112	+	DNA/hAT-Charlie	MER112	4.55181	0.434534	10.4751	3.81301e-06	Yes	0	ENSG00000158528	PPP1R9A
chr1	55177038	55177404	L1ME5	+	LINE/L1	L1ME5	13.9042	0.605518	22.9624	3.85268e-06	Yes	0	ENSG00000271723	MROH7-TTC4
chr12	49310481	49310578	L1ME4b	+	LINE/L1	L1ME4b	27.5543	2.45196	11.2377	3.89481e-06	Yes	0	ENSG00000272822	RP11-302B13.5
chr1	210339222	210339524	L2c	-	LINE/L2	L2c	6.13727	36.8876	-6.01043	3.94837e-06	Yes	1587	ENSG00000143469	SYT14
chr9	113632842	113633676	L1MC4	+	LINE/L1	L1MC4	11.2471	0.553874	20.3062	3.96803e-06	Yes	1868	ENSG00000198121	LPAR1
chr1	149225303	149225854	MER41E	+	LTR/ERV1	MER41E	5.81353	32.9993	-5.6763	3.9753e-06	Yes	174278	ENSG00000203818	HIST2H3PS2
chr11	122941860	122942152	AluSx	+	SINE/Alu	AluSx	10.1309	65.6744	-6.4826	3.9753e-06	Yes	884	ENSG00000166250	CLMP
chr17	79355111	79355405	MLT1C2	-	LTR/ERVL-MaLR	MLT1C2	12.8047	0.527865	24.2576	3.9753e-06	Yes	-13871	ENSG00000263053	RP11-1055B8.6
chr2	48829398	48830104	L2a	-	LINE/L2	L2a	4.43617	36.6046	-8.25139	3.9753e-06	Yes	0	ENSG00000068781	STON1-GTF2A1L
chr22	38367382	38367474	L3b	+	LINE/CR1	L3b	14.4773	1.02158	14.1715	3.9753e-06	Yes	0	ENSG00000100142	POLR2F
chr17	18568127	18569227	Charlie1	+	DNA/hAT-Charlie	Charlie1	7.73491	41.3136	-5.34119	3.99976e-06	Yes	0	ENSG00000249459	ZNF286B
chr19	21629686	21630298	L1P1	-	LINE/L1	L1P1	1.2311	15.8827	-12.9012	4.00015e-06	Yes	0	ENSG00000269237	CTD-2561J22.3
chr3	182894469	182894926	LTR50	+	LTR/ERVL	LTR50	214.686	39.9493	5.37396	4.0277e-06	Yes	906	ENSG00000053524	MCF2L2
chr6	28391868	28393094	Tigger1	-	DNA/TcMar-Tigger	Tigger1	40.7525	171.183	-4.20055	4.08852e-06	Yes	6614	ENSG00000187987	ZSCAN23
chr21	15260910	15262442	MSTA-int	-	LTR/ERVL-MaLR	MSTA-int	3.97794	0.395504	10.0579	4.11994e-06	Yes	-207452	ENSG00000269011	AL050303.1
chr6	28086980	28087276	AluSc	+	SINE/Alu	AluSc	5.3933	0.438244	12.3066	4.26585e-06	Yes	-5063	ENSG00000196812	ZSCAN16
chr12	52692598	52693919	L1MA4	-	LINE/L1	L1MA4	21.0846	1.15787	18.2098	4.29849e-06	Yes	0	ENSG00000170442	KRT86
chr17	79351881	79352177	AluSp	-	SINE/Alu	AluSp	7.25531	0.393031	18.4599	4.29849e-06	Yes	-17099	ENSG00000263053	RP11-1055B8.6
chr4	86927746	86929741	L2a	+	LINE/L2	L2a	79.7041	12.6007	6.32539	4.35503e-06	Yes	3924	ENSG00000138639	ARHGAP24
chr11	63338306	63338393	AluJr	-	SINE/Alu	AluJr	6.81984	0.479353	14.2272	4.39987e-06	Yes	2275	ENSG00000176485	PLA2G16
chr6	6346309	6346646	AluSz	-	SINE/Alu	AluSz	6.44148	0.393577	16.3665	4.39987e-06	Yes	-25064	ENSG00000124491	F13A1
chr6	84851892	84855898	MER34B-int	+	LTR/ERV1	MER34B-int	19.4097	1.33143	14.5781	4.41278e-06	Yes	0	ENSG00000135315	KIAA1009
chr17	3396933	3397113	MIR3	-	SINE/MIR	MIR3	7.41946	0.393918	18.8351	4.4678e-06	Yes	0	ENSG00000141255	SPATA22
chrX	152583322	152583543	LTR104_Mam	-	LTR/Gypsy	LTR104_Mam	19.8229	0.972011	20.3937	4.47582e-06	Yes	-16071	ENSG00000063587	ZNF275
chr5	132576526	132577056	MER77B	+	LTR/ERVL	MER77B	8.24255	0.394258	20.9065	4.4966e-06	Yes	0	ENSG00000053108	FSTL4
chr16	66602508	66602801	AluSx	+	SINE/Alu	AluSx	18.3192	71.024	-3.87701	4.53576e-06	Yes	0	ENSG00000254788	CKLF-CMTM1
chr6	166729907	166731141	HERVK14-int|HERVK14-int|MER41C|HERVK14-int|LTR14B|LTR14B	+	LTR/ERVK	HERVK14-int	32.8519	2.52327	13.0196	4.56591e-06	Yes	2076	ENSG00000198818	SFT2D1
chr15	47102118	47103237	L1M4a1	-	LINE/L1	L1M4a1	4.1472	0.39421	10.5203	4.58137e-06	Yes	322457	ENSG00000259752	FKSG62
chr15	90677887	90681532	HERVH-int|HERVH-int|HERVH-int|HERVH-int|HERVH-int|LTR7B	+	LTR/ERV1	HERVH-int	23.068	1.12905	20.4313	4.5835e-06	Yes	-22305	ENSG00000185033	SEMA4B
chr14	75912314	75913545	L1MB8	+	LINE/L1	L1MB8	47.8993	7.07597	6.76928	4.58711e-06	Yes	0	ENSG00000140044	JDP2
chr21	15256559	15257339	MSTA|MSTA-int|MSTA|MSTA|MSTA-int	-	LTR/ERVL-MaLR	MSTA-int	4.08846	0.395816	10.3292	4.59159e-06	Yes	-203101	ENSG00000269011	AL050303.1
chr6	125581669	125581981	AluSx1	+	SINE/Alu	AluSx1	9.1302	0.531879	17.1659	4.59159e-06	Yes	0	ENSG00000111907	TPD52L1
chr13	32973924	32974222	AluSx	-	SINE/Alu	AluSx	1.82952	20.0199	-10.9427	4.6698e-06	Yes	120	ENSG00000139618	BRCA2
chr8	42762887	42764624	L1MA7	+	LINE/L1	L1MA7	6.14538	45.8088	-7.45418	4.67662e-06	Yes	0	ENSG00000168172	HOOK3
chr17	79354052	79354199	MIR3	+	SINE/MIR	MIR3	15.3715	0.587076	26.1831	4.68613e-06	Yes	-15077	ENSG00000263053	RP11-1055B8.6
chr2	175663604	175663730	MIR3	-	SINE/MIR	MIR3	12.5897	0.850239	14.8073	4.74852e-06	Yes	362	ENSG00000128656	CHN1
chr16	3059368	3059671	AluSp	+	SINE/Alu	AluSp	2.53525	0.394434	6.42757	4.8006e-06	Yes	-2787	ENSG00000213937	CLDN9
chr1	151709143	151711223	MSTA|MSTA-int|MSTA	+	LTR/ERVL-MaLR	MSTA-int	23.8643	2.54956	9.36016	4.86166e-06	Yes	6863	ENSG00000178796	RIIAD1
chr11	124794071	124794157	L2c	-	LINE/L2	L2c	16.0077	1.06186	15.0752	4.90711e-06	Yes	0	ENSG00000165478	HEPACAM
chr20	45062000	45062624	MLT2B3|MLT2B3	+	LTR/ERVL	MLT2B3	15.4864	1.15727	13.3818	4.91352e-06	Yes	-297	ENSG00000062598	ELMO2
chr6	168085772	168085992	L2d2	+	LINE/L2	L2d2	0.535304	12.9159	-24.1281	4.91352e-06	Yes	99226	ENSG00000146521	C6orf123
chr9	124058800	124058976	MIR3	-	SINE/MIR	MIR3	8.69335	0.394245	22.0506	4.97846e-06	Yes	0	ENSG00000148180	GSN
chr1	234461887	234462225	L1MB3	+	LINE/L1	L1MB3	7.87246	0.434263	18.1283	4.98143e-06	Yes	1626	ENSG00000183780	SLC35F3
chr13	45908436	45909135	L2a	+	LINE/L2	L2a	48.5016	167.647	-3.45653	4.98143e-06	Yes	1874	ENSG00000133112	TPT1
chr5	80393155	80394472	L2a	-	LINE/L2	L2a	10.9596	0.632272	17.3337	5.00615e-06	Yes	0	ENSG00000113319	RASGRF2
chr16	88127368	88127479	L1MC4	-	LINE/L1	L1MC4	9.45673	0.588029	16.0821	5.00688e-06	Yes	16445	ENSG00000172530	BANP
chrX	101762380	101763638	L1M4	+	LINE/L1	L1M4	0.541078	6.3426	-11.7221	5.03466e-06	Yes	4967	ENSG00000158164	TMSB15A
chr2	85836812	85837102	AluSx	-	SINE/Alu	AluSx	7.19211	34.5058	-4.79772	5.05093e-06	Yes	0	ENSG00000168883	USP39
chr21	48011150	48013459	THE1B|THE1B-int|THE1B	+	LTR/ERVL-MaLR	THE1B-int	44.118	3.39369	13	5.05093e-06	Yes	5417	ENSG00000160307	S100B
chr2	31497669	31497862	L2d	+	LINE/L2	L2d	29.2709	3.63248	8.05809	5.0666e-06	Yes	5357	ENSG00000013016	EHD3
chr10	134782209	134784043	L1MEf	-	LINE/L1	L1MEf	9.87778	0.64872	15.2266	5.07877e-06	Yes	-25883	ENSG00000171811	TTC40
chr2	86124791	86126168	L1MEd	+	LINE/L1	L1MEd	7.91775	0.479685	16.5061	5.09921e-06	Yes	-8655	ENSG00000115525	ST3GAL5
chr19	53858509	53858846	AluSc	-	SINE/Alu	AluSc	3.71952	20.3687	-5.47616	5.10822e-06	Yes	388	ENSG00000213799	ZNF845
chr8	59117964	59120657	L1PA14	-	LINE/L1	L1PA14	15.9585	65.1376	-4.08168	5.1397e-06	Yes	1127	ENSG00000169122	FAM110B
chr12	120080380	120080527	MIRc	+	SINE/MIR	MIRc	9.62714	0.43605	22.0781	5.14136e-06	Yes	1018	ENSG00000224982	TMEM233
chr7	44872834	44873133	AluY	-	SINE/Alu	AluY	25.498	133.182	-5.22324	5.14645e-06	Yes	0	ENSG00000105968	H2AFV
chr1	40119813	40120332	Tigger12c	-	DNA/TcMar-Tigger	Tigger12c	18.6104	1.05987	17.5591	5.1586e-06	Yes	4462	ENSG00000116981	NT5C1A
chr19	41072589	41072892	AluSz	+	SINE/Alu	AluSz	9.04734	0.587195	15.4077	5.19227e-06	Yes	0	ENSG00000160460	SPTBN4
chr20	47272908	47273441	L2a	+	LINE/L2	L2a	7.76241	0.502868	15.4363	5.2078e-06	Yes	0	ENSG00000124126	PREX1
chr4	40160949	40161398	MLT1J	-	LTR/ERVL-MaLR	MLT1J	1.89714	19.8216	-10.4482	5.2078e-06	Yes	1078	ENSG00000078177	N4BP2
chr1	46687115	46687425	AluJb	-	SINE/Alu	AluJb	13.6762	1.04263	13.117	5.26938e-06	Yes	183	ENSG00000171357	LURAP1
chr9	113629988	113630372	L2	+	LINE/L2	L2	14.3018	1.04746	13.6537	5.28088e-06	Yes	5172	ENSG00000198121	LPAR1
chr15	90049124	90049336	MER20	-	DNA/hAT-Charlie	MER20	1.46817	20.5784	-14.0163	5.30349e-06	Yes	-9281	ENSG00000140519	RHCG
chr17	79086569	79086885	AluJr	+	SINE/Alu	AluJr	36.6297	1.7153	21.3547	5.30349e-06	Yes	0	ENSG00000175866	BAIAP2
chr16	88111730	88111886	L1MEd	+	LINE/L1	L1MEd	10.8582	0.530061	20.4849	5.32322e-06	Yes	807	ENSG00000172530	BANP
chr4	17487181	17487419	L1MB5	+	LINE/L1	L1MB5	43.5118	7.27587	5.98029	5.32322e-06	Yes	0	ENSG00000151552	QDPR
chr9	106904267	106904766	MER67A	-	LTR/ERV1	MER67A	2.55649	22.6208	-8.8484	5.32322e-06	Yes	570	ENSG00000136824	SMC2
chr1	230933350	230933491	MIR3	-	SINE/MIR	MIR3	12.0114	0.653924	18.3683	5.3848e-06	Yes	0	ENSG00000135773	CAPN9
chr5	163158301	163158736	MER39	+	LTR/ERV1	MER39	6.39233	0.480648	13.2994	5.3848e-06	Yes	211960	ENSG00000038274	MAT2B
chr15	56381480	56381727	MLT1L	+	LTR/ERVL-MaLR	MLT1L	3.1324	27.6203	-8.81763	5.39284e-06	Yes	0	ENSG00000181827	RFX7
chr2	48830127	48830584	MER34A	-	LTR/ERV1	MER34A	1.06355	15.3925	-14.4728	5.39284e-06	Yes	0	ENSG00000068781	STON1-GTF2A1L
chr17	79087759	79088073	AluJb	-	SINE/Alu	AluJb	24.1132	1.50963	15.9729	5.42626e-06	Yes	0	ENSG00000175866	BAIAP2
chrX	34362094	34364682	L1PA8A	+	LINE/L1	L1PA8A	11.1172	0.784279	14.1751	5.42626e-06	Yes	-211648	ENSG00000185448	FAM47A
chr1	67241293	67241555	L2b	-	LINE/L2	L2b	4.14895	0.437717	9.4786	5.49472e-06	Yes	0	ENSG00000152760	TCTEX1D1
chr5	132553545	132554678	L2a	+	LINE/L2	L2a	4.20887	0.435973	9.65396	5.50201e-06	Yes	0	ENSG00000053108	FSTL4
chr10	88801659	88801955	AluSx1	-	SINE/Alu	AluSx1	20.853	1.07664	19.3685	5.51647e-06	Yes	8289	ENSG00000148672	GLUD1
chr19	2288078	2288248	L3	-	LINE/CR1	L3	46.0773	3.32529	13.8566	5.51647e-06	Yes	1527	ENSG00000220008	LINGO3
chr21	45898980	45900001	LTR13	-	LTR/ERVK	LTR13	1.84004	21.6164	-11.7478	5.51647e-06	Yes	16903	ENSG00000269430	LRRC3DN
chr4	6570197	6570642	MLT1B	+	LTR/ERVL-MaLR	MLT1B	16.8215	0.824752	20.3959	5.53344e-06	Yes	-4871	ENSG00000074211	PPP2R2C
chr16	75508182	75508472	AluJb	-	SINE/Alu	AluJb	25.3571	3.1482	8.05447	5.54408e-06	Yes	2478	ENSG00000183196	CHST6
chr1	116241517	116241950	MSTB1	+	LTR/ERVL-MaLR	MSTB1	3.13522	0.395475	7.92773	5.61287e-06	Yes	673	ENSG00000173218	VANGL1
chr3	73029729	73030026	AluSq	-	SINE/Alu	AluSq	29.2601	5.11601	5.71932	5.66223e-06	Yes	0	ENSG00000172986	GXYLT2
chr7	122456783	122460596	LTR7|HERVH-int|HERVH-int	+	LTR/ERV1	HERVH-int	4.09461	0.435	9.41289	5.66223e-06	Yes	0	ENSG00000081803	CADPS2
chr4	88395067	88395236	MER5B	+	DNA/hAT-Charlie	MER5B	11.0252	0.570846	19.3138	5.70755e-06	Yes	0	ENSG00000152583	SPARCL1
chr15	82975841	82976085	AluJb	-	SINE/Alu	AluJb	2.01997	18.877	-9.34521	5.71978e-06	Yes	35295	ENSG00000259243	GOLGA6L19
chr6	160337145	160337236	MIRc	+	SINE/MIR	MIRc	9.05332	0.431009	21.005	5.741e-06	Yes	8038	ENSG00000130368	MAS1
chr8	42985289	42985415	L2c	+	LINE/L2	L2c	12.0133	58.2347	-4.84754	5.741e-06	Yes	6713	ENSG00000185900	POMK
chr19	13332037	13332333	AluSz6	-	SINE/Alu	AluSz6	7.26664	0.433544	16.761	5.82547e-06	Yes	0	ENSG00000141837	CACNA1A
chr4	66461953	66462173	MER20	+	DNA/hAT-Charlie	MER20	10.5068	48.9294	-4.65694	5.82547e-06	Yes	0	ENSG00000145242	EPHA5
chr6	2994309	2994683	MSTB1	+	LTR/ERVL-MaLR	MSTB1	28.8104	2.00472	14.3713	5.82547e-06	Yes	0	ENSG00000124588	NQO2
chrX	28882482	28883272	L2a	-	LINE/L2	L2a	4.35042	0.434325	10.0165	5.82547e-06	Yes	0	ENSG00000169306	IL1RAPL1
chr4	17486247	17486578	AluSz	+	SINE/Alu	AluSz	33.9952	5.43886	6.25043	5.83659e-06	Yes	0	ENSG00000151552	QDPR
chr6	16259243	16265124	LTR7|HERVH-int|HERVH-int|HERVH-int|HERVH-int|HERVH-int|HERVH-int|LTR7	-	LTR/ERV1	HERVH-int	12.6783	0.631783	20.0675	5.88628e-06	Yes	0	ENSG00000137198	GMPR
chr11	36331343	36331851	Charlie31a	-	DNA/hAT-Charlie	Charlie31a	14.4219	1.08464	13.2964	5.91806e-06	Yes	0	ENSG00000135362	PRR5L
chr7	64771281	64776772	PABL_B-int|PABL_B	+	LTR/ERV1	PABL_B-int	0.540515	8.41918	-15.5762	5.93503e-06	Yes	-61941	ENSG00000146757	ZNF92
chr15	101611890	101612224	L2a	-	LINE/L2	L2a	10.3857	0.612994	16.9426	5.93864e-06	Yes	1574	ENSG00000154237	LRRK1
chr6	166727386	166729919	HERV17-int|HERV17-int|HERV17-int	+	LTR/ERV1	HERV17-int	29.6631	3.32741	8.91476	5.93864e-06	Yes	3298	ENSG00000198818	SFT2D1
chr7	138708028	138708292	MER102c	+	DNA/hAT-Charlie	MER102c	11.641	56.8178	-4.88082	6.17246e-06	Yes	2161	ENSG00000146858	ZC3HAV1L
chr19	44289711	44289817	L2a	-	LINE/L2	L2a	21.8369	1.49856	14.572	6.18925e-06	Yes	-4303	ENSG00000104783	KCNN4
chr18	14996792	14997303	THE1D|THE1D	+	LTR/ERVL-MaLR	THE1D	8.94896	0.637182	14.0446	6.20247e-06	Yes	144056	ENSG00000180777	ANKRD30B
chr3	193117695	193118054	L3	-	LINE/CR1	L3	58.3781	5.15568	11.3231	6.20247e-06	Yes	1813	ENSG00000127249	ATP13A4
chrX	119563120	119563358	MIRb	+	SINE/MIR	MIRb	28.3462	1.2715	22.2934	6.21599e-06	Yes	0	ENSG00000005893	LAMP2
chr4	66464243	66464664	L2c	-	LINE/L2	L2c	5.52265	49.9854	-9.05099	6.26929e-06	Yes	0	ENSG00000145242	EPHA5
chr3	124127232	124127419	MIR	+	SINE/MIR	MIR	13.3265	0.696914	19.1221	6.32631e-06	Yes	0	ENSG00000160145	KALRN
chr1	161339487	161339605	L1ME4b	-	LINE/L1	L1ME4b	65.4797	15.8361	4.13485	6.36487e-06	Yes	-1824	ENSG00000188931	C1orf192
chr15	51678931	51679414	L2a	-	LINE/L2	L2a	7.56373	0.506737	14.9264	6.38851e-06	Yes	0	ENSG00000186417	GLDN
chr19	23293383	23294266	MER57A-int	+	LTR/ERV1	MER57A-int	0.976272	13.2562	-13.5783	6.41224e-06	Yes	0	ENSG00000183850	ZNF730
chr5	147859937	147860215	AluSz	-	SINE/Alu	AluSz	9.74822	0.584216	16.686	6.41224e-06	Yes	0	ENSG00000164270	HTR4
chr1	233819195	233824390	LTR7|HERVH-int|HERVH-int|HERVH-int|HERVH-int|HERVH-int	-	LTR/ERV1	HERVH-int	4.5485	0.456174	9.97098	6.44861e-06	Yes	10938	ENSG00000135750	KCNK1
chr11	1289200	1289507	AluSx	-	SINE/Alu	AluSx	25.7471	3.6778	7.00067	6.44861e-06	Yes	5795	ENSG00000117983	MUC5B
chr11	85413592	85415684	L1MEg	+	LINE/L1	L1MEg	10.5263	0.639079	16.471	6.44897e-06	Yes	0	ENSG00000137501	SYTL2
chr13	42039592	42039752	MIR3	-	SINE/MIR	MIR3	8.47221	0.505455	16.7616	6.53815e-06	Yes	0	ENSG00000102760	RGCC
chr10	91042799	91043196	MER57B1	+	LTR/ERV1	MER57B1	10.2903	0.675661	15.2299	6.54109e-06	Yes	0	ENSG00000107798	LIPA
chr6	85421420	85428091	LTR17|HERV17-int|HERV17-int|HERV17-int	-	LTR/ERV1	HERV17-int	4.78462	0.455832	10.4965	6.54623e-06	Yes	0	ENSG00000112837	TBX18
chr10	91091335	91091638	AluSz	+	SINE/Alu	AluSz	34.8268	2.25578	15.4389	6.64427e-06	Yes	0	ENSG00000107798	LIPA
chr3	185361183	185361353	MER5A	-	DNA/hAT-Charlie	MER5A	0.705108	9.3281	-13.2293	6.68422e-06	Yes	175	ENSG00000073792	IGF2BP2
chr9	138603262	138603416	MIRb	+	SINE/MIR	MIRb	4.65743	0.395769	11.768	6.68422e-06	Yes	0	ENSG00000107147	KCNT1
chr1	220755686	220755861	MER91A	-	DNA/hAT-Tip100	MER91A	8.09899	38.7712	-4.78716	6.87475e-06	Yes	0	ENSG00000116141	MARK1
chr17	79356331	79356644	AluSx	-	SINE/Alu	AluSx	20.4674	1.04094	19.6625	6.87475e-06	Yes	-12632	ENSG00000263053	RP11-1055B8.6
chr1	49323407	49324534	L1MB7	+	LINE/L1	L1MB7	19.7152	1.45638	13.5372	6.88065e-06	Yes	0	ENSG00000186094	AGBL4
chr5	146356947	146358431	L1PA7	-	LINE/L1	L1PA7	4.45537	0.434734	10.2485	6.88065e-06	Yes	0	ENSG00000156475	PPP2R2B
chr2	201267433	201268187	L3	+	LINE/CR1	L3	7.22174	0.524026	13.7812	6.89307e-06	Yes	0	ENSG00000196141	SPATS2L
chr9	138603714	138603909	MIRb	-	SINE/MIR	MIRb	4.06077	0.395835	10.2587	6.92766e-06	Yes	0	ENSG00000107147	KCNT1
chr5	86345647	86347615	HERVL-int	-	LTR/ERVL	HERVL-int	12.0021	0.646822	18.5556	6.97338e-06	Yes	164809	ENSG00000233828	AC008394.1
chr4	79605201	79605542	L2a	+	LINE/L2	L2a	18.3009	1.1665	15.6887	6.98243e-06	Yes	73605	ENSG00000138772	ANXA3
chr14	29264692	29264988	AluJb	+	SINE/Alu	AluJb	9.1634	58.263	-6.35824	7.00917e-06	Yes	0	ENSG00000186960	C14orf23
chr9	92093740	92094261	MLT1G	-	LTR/ERVL-MaLR	MLT1G	7.37176	0.557473	13.2235	7.03365e-06	Yes	0	ENSG00000187764	SEMA4D
chr5	87725754	87728065	THE1D|THE1D-int|THE1D	-	LTR/ERVL-MaLR	THE1D-int	7.69632	43.889	-5.70259	7.03851e-06	Yes	-160462	ENSG00000164180	TMEM161B
chr11	49166678	49167401	LTR41	+	LTR/ERVL	LTR41	34.2281	3.20546	10.6781	7.09477e-06	Yes	787	ENSG00000086205	FOLH1
chr3	170141569	170141841	AluSx	+	SINE/Alu	AluSx	7.2952	0.392641	18.5798	7.09477e-06	Yes	0	ENSG00000013297	CLDN11
chr5	150309042	150309350	L1MD1	+	LINE/L1	L1MD1	0.850047	10.2588	-12.0685	7.09477e-06	Yes	-24498	ENSG00000145908	ZNF300
chr16	13886578	13886858	AluSq2	-	SINE/Alu	AluSq2	4.32088	0.395135	10.9352	7.11984e-06	Yes	-127157	ENSG00000175595	ERCC4
chr7	106294677	106295265	L1ME3A	+	LINE/L1	L1ME3A	1.34633	15.6759	-11.6434	7.12343e-06	Yes	1947	ENSG00000253276	CCDC71L
chr16	29269889	29270317	MLT1D	-	LTR/ERVL-MaLR	MLT1D	5.77417	0.394223	14.647	7.20861e-06	Yes	122359	ENSG00000254206	NPIPB11
chr12	99143185	99143469	L2a	-	LINE/L2	L2a	31.4278	3.2476	9.67722	7.38712e-06	Yes	0	ENSG00000185046	ANKS1B
chr19	28367856	28376825	LTR9B|HUERS-P3-int|HUERS-P3-int|LTR9B	+	LTR/ERV1	HUERS-P3-int	27.0946	2.63784	10.2715	7.38838e-06	Yes	1321349	ENSG00000169021	UQCRFS1
chr6	88408337	88408456	MER103C	-	DNA/hAT-Charlie	MER103C	15.778	96.0304	-6.08637	7.38838e-06	Yes	0	ENSG00000135334	AKIRIN2
chr8	70767849	70768792	SVA_A	+	Retroposon/SVA	SVA_A	2.22113	20.6051	-9.27684	7.38838e-06	Yes	-20551	ENSG00000137571	SLCO5A1
chr4	6511632	6512259	L2a	+	LINE/L2	L2a	3.82117	0.435941	8.76534	7.43799e-06	Yes	0	ENSG00000074211	PPP2R2C
chr1	31825594	31827240	L1MB3	-	LINE/L1	L1MB3	15.2856	1.55492	9.83043	7.48204e-06	Yes	0	ENSG00000121766	ZCCHC17
chr19	39603870	39604320	L2a	+	LINE/L2	L2a	2.01481	0.39439	5.10867	7.49949e-06	Yes	1738	ENSG00000183760	PAPL
chr3	185863193	185863359	L3	-	LINE/CR1	L3	7.77873	0.618036	12.5862	7.55567e-06	Yes	0	ENSG00000058866	DGKG
chr6	97064840	97064960	MamSINE1	+	SINE/tRNA-RTE	MamSINE1	6.50874	0.505887	12.866	7.55567e-06	Yes	329	ENSG00000112214	FHL5
chr8	30509115	30510745	L1MB8	+	LINE/L1	L1MB8	0.800917	10.5198	-13.1347	7.60273e-06	Yes	0	ENSG00000197265	GTF2E2
chr1	95598952	95600166	L2b	-	LINE/L2	L2b	5.16233	0.469016	11.0067	7.64029e-06	Yes	0	ENSG00000152078	TMEM56
chr10	70655342	70655549	MIRb	+	SINE/MIR	MIRb	16.7812	1.88535	8.90086	7.72142e-06	Yes	155	ENSG00000165730	STOX1
chr15	56380423	56380620	MIRb	+	SINE/MIR	MIRb	1.78098	17.4261	-9.78457	7.74088e-06	Yes	0	ENSG00000181827	RFX7
chr10	43140507	43150417	HERV1_LTRa|HERV1_I-int|HERV1_I-int|HERV1_LTRa	+	LTR/ERV1	HERV1_I-int	30.8079	3.52567	8.73817	7.75148e-06	Yes	-6516	ENSG00000196693	ZNF33B
chr12	21429393	21430513	L1MA3	+	LINE/L1	L1MA3	6.54598	0.393262	16.6453	7.75247e-06	Yes	0	ENSG00000084453	SLCO1A2
chr1	233811614	233811865	Charlie31a	-	DNA/hAT-Charlie	Charlie31a	11.8103	0.811082	14.5612	7.76212e-06	Yes	3357	ENSG00000135750	KCNK1
chr4	40161914	40162268	MER47B	+	DNA/TcMar-Tigger	MER47B	1.6628	17.8111	-10.7115	7.77885e-06	Yes	2043	ENSG00000078177	N4BP2
chr9	35864429	35864663	MIRb	+	SINE/MIR	MIRb	74.6837	17.2143	4.33847	7.77885e-06	Yes	4713	ENSG00000168828	OR13J1
chr20	60006739	60007889	L1ME1	-	LINE/L1	L1ME1	24.2864	2.4813	9.78779	7.88616e-06	Yes	0	ENSG00000179242	CDH4
chr1	205489545	205489856	AluSz	+	SINE/Alu	AluSz	3.25903	0.395523	8.2398	7.90705e-06	Yes	0	ENSG00000117266	CDK18
chr8	143582349	143582395	L2d2	+	LINE/L2	L2d2	8.86976	0.606367	14.6277	7.96899e-06	Yes	0	ENSG00000181790	BAI1
chr3	58400782	58401359	MER21A	-	LTR/ERVL	MER21A	19.3017	0.897021	21.5175	8.02727e-06	Yes	0	ENSG00000168297	PXK
chr10	73056955	73057181	MIRc	-	SINE/MIR	MIRc	7.17203	0.530214	13.5267	8.06225e-06	Yes	0	ENSG00000107731	UNC5B
chr7	130763999	130764478	L2c	+	LINE/L2	L2c	5.35391	0.434323	12.327	8.06225e-06	Yes	-30378	ENSG00000128585	MKLN1
chr5	76175726	76181435	LTR7B|HERVH-int|HERVH-int	-	LTR/ERV1	HERVH-int	6.59717	0.500783	13.1737	8.08199e-06	Yes	0	ENSG00000171643	S100Z
chr1	24800933	24801034	MIRb	-	SINE/MIR	MIRb	27.3854	4.17406	6.56085	8.10924e-06	Yes	1468	ENSG00000001461	NIPAL3
chr1	46692622	46692915	AluJr4	-	SINE/Alu	AluJr4	20.2651	1.8546	10.9269	8.12634e-06	Yes	5690	ENSG00000171357	LURAP1
chr9	19768796	19769425	L2	+	LINE/L2	L2	5.08989	0.435973	11.6748	8.12634e-06	Yes	0	ENSG00000155886	SLC24A2
chrX	56315283	56316228	L1MC3	-	LINE/L1	L1MC3	8.58507	44.208	-5.1494	8.13844e-06	Yes	962	ENSG00000102349	KLF8
chr12	121095892	121096200	AluSz	-	SINE/Alu	AluSz	11.6111	0.674853	17.2053	8.19588e-06	Yes	0	ENSG00000157782	CABP1
chr14	68032557	68032850	AluSz	+	SINE/Alu	AluSz	13.6588	0.67245	20.3119	8.19588e-06	Yes	0	ENSG00000054690	PLEKHH1
chr9	138041411	138042370	LTR13A	-	LTR/ERVK	LTR13A	13.9769	0.650768	21.4775	8.19588e-06	Yes	28387	ENSG00000130558	OLFM1
chr2	73299311	73299668	L2b	+	LINE/L2	L2b	10.0603	0.673125	14.9456	8.20761e-06	Yes	0	ENSG00000144040	SFXN5
chr6	150382405	150383491	L1PA16	-	LINE/L1	L1PA16	16.4936	62.7895	-3.8069	8.20761e-06	Yes	796	ENSG00000131019	ULBP3
chr21	47741274	47741810	L1MC3	-	LINE/L1	L1MC3	6.08821	36.5831	-6.00884	8.23724e-06	Yes	0	ENSG00000160298	C21orf58
chr21	47741921	47742222	AluJb	+	SINE/Alu	AluJb	1.70474	16.0996	-9.44406	8.27963e-06	Yes	0	ENSG00000160298	C21orf58
chr15	20616750	20622251	L1PA4	-	LINE/L1	L1PA4	12.9598	0.523512	24.7554	8.2968e-06	Yes	114844	ENSG00000215405	GOLGA6L6
chr3	42824830	42825110	AluSz6	+	SINE/Alu	AluSz6	67.1933	17.724	3.7911	8.2968e-06	Yes	0	ENSG00000181061	HIGD1A
chr2	95887885	95888949	L1ME1	-	LINE/L1	L1ME1	7.6826	40.646	-5.29066	8.32904e-06	Yes	37821	ENSG00000163067	ZNF2
chr12	65449270	65449583	AluSg4	+	SINE/Alu	AluSg4	7.79152	0.530447	14.6886	8.41351e-06	Yes	0	ENSG00000156076	WIF1
chr19	35820947	35821258	AluSx	+	SINE/Alu	AluSx	8.83783	0.394793	22.386	8.46774e-06	Yes	0	ENSG00000012124	CD22
chr2	181936835	181937034	MER30	-	DNA/hAT-Charlie	MER30	1.7719	16.7521	-9.45432	8.46774e-06	Yes	0	ENSG00000170035	UBE2E3
chr19	23151100	23153323	L1MA8	+	LINE/L1	L1MA8	13.1208	0.974497	13.4642	8.52696e-06	Yes	4948	ENSG00000269067	ZNF728
chr1	36201539	36201841	AluSz	+	SINE/Alu	AluSz	2.87567	20.5246	-7.1373	8.53929e-06	Yes	0	ENSG00000092853	CLSPN
chr2	201265673	201265878	MLT1F	+	LTR/ERVL-MaLR	MLT1F	3.9315	0.394766	9.95906	8.55063e-06	Yes	0	ENSG00000196141	SPATS2L
chr9	138600393	138600684	AluJb	-	SINE/Alu	AluJb	4.38796	0.394737	11.1162	8.55859e-06	Yes	0	ENSG00000107147	KCNT1
chr16	13886205	13886325	MLT1E2	-	LTR/ERVL-MaLR	MLT1E2	4.84851	0.48381	10.0215	8.65008e-06	Yes	-127690	ENSG00000175595	ERCC4
chr3	58401360	58402145	LTR39	-	LTR/ERV1	LTR39	23.1143	1.19313	19.3728	8.68532e-06	Yes	0	ENSG00000168297	PXK
chr5	146363512	146364571	L1MA7	-	LINE/L1	L1MA7	6.63437	0.392841	16.8882	8.68782e-06	Yes	0	ENSG00000156475	PPP2R2B
chr6	170489940	170490317	MLT1B	-	LTR/ERVL-MaLR	MLT1B	5.08598	0.394588	12.8894	8.68782e-06	Yes	100978	ENSG00000198719	DLL1
chr9	113629397	113629683	MLT1J2	-	LTR/ERVL-MaLR	MLT1J2	11.6083	0.717138	16.187	8.7233e-06	Yes	5861	ENSG00000198121	LPAR1
chr1	44935596	44936048	L2a	-	LINE/L2	L2a	6.4093	0.393342	16.2945	8.94345e-06	Yes	0	ENSG00000187147	RNF220
chr1	78490295	78490580	AluJo	+	SINE/Alu	AluJo	36.8369	7.64488	4.81851	8.94345e-06	Yes	0	ENSG00000137960	GIPC2
chr14	68031035	68031174	L1MC5	+	LINE/L1	L1MC5	13.5552	0.610854	22.1905	8.94345e-06	Yes	0	ENSG00000054690	PLEKHH1
chr4	39454806	39455074	AluJr4	+	SINE/Alu	AluJr4	21.6493	89.3193	-4.12573	8.94345e-06	Yes	671	ENSG00000163682	RPL9
chr8	53285780	53286658	L2d	+	LINE/L2	L2d	4.71162	0.394893	11.9314	8.94345e-06	Yes	0	ENSG00000147488	ST18
chrX	101896175	101897372	L1PA7	-	LINE/L1	L1PA7	28.565	95.3466	-3.33788	8.94345e-06	Yes	-8923	ENSG00000198932	GPRASP1
chr1	247262656	247262942	AluSc	-	SINE/Alu	AluSc	2.8472	23.4379	-8.23191	8.95845e-06	Yes	323	ENSG00000188295	ZNF669
chr8	89723821	89727090	MER34-int|MER34A	+	LTR/ERV1	MER34-int	79.8902	12.5737	6.35373	8.97011e-06	Yes	-383568	ENSG00000156103	MMP16
chr1	37269388	37269711	L1M5	-	LINE/L1	L1M5	2.50894	21.3381	-8.50483	9.01224e-06	Yes	0	ENSG00000163873	GRIK3
chr1	153562071	153562370	AluSp	+	SINE/Alu	AluSp	10.1061	0.671327	15.0539	9.01224e-06	Yes	16993	ENSG00000188643	S100A16
chr19	24121912	24125825	L1MA4	-	LINE/L1	L1MA4	4.87537	42.429	-8.70274	9.01224e-06	Yes	0	ENSG00000213967	ZNF726
chr1	4783168	4783984	L2	-	LINE/L2	L2	2.78655	0.395885	7.03877	9.0642e-06	Yes	0	ENSG00000196581	AJAP1
chr11	73367079	73367480	L2b	+	LINE/L2	L2b	9.05076	0.394579	22.9377	9.0992e-06	Yes	0	ENSG00000021300	PLEKHB1
chr19	13443934	13444252	L2a	+	LINE/L2	L2a	4.2899	0.45755	9.3758	9.0992e-06	Yes	0	ENSG00000141837	CACNA1A
chr4	92524856	92525192	MLT1A	-	LTR/ERVL-MaLR	MLT1A	4.90839	29.8526	-6.08194	9.0992e-06	Yes	1793	ENSG00000184305	CCSER1
chr5	125830210	125830480	AluJo	+	SINE/Alu	AluJo	19.3619	0.717432	26.9878	9.11435e-06	Yes	0	ENSG00000155324	GRAMD3
chr7	63539735	63542971	L1PREC2	-	LINE/L1	L1PREC2	73.1901	3.90801	18.7282	9.11623e-06	Yes	809	ENSG00000257482	ZNF727
chr1	77895555	77896553	L2a	-	LINE/L2	L2a	8.47391	0.58924	14.3811	9.16365e-06	Yes	0	ENSG00000154027	AK5
chr12	111385445	111385941	MLT1D	-	LTR/ERVL-MaLR	MLT1D	15.0578	0.904618	16.6454	9.20135e-06	Yes	-26920	ENSG00000111245	MYL2
chr12	32492765	32493013	MER102c	+	DNA/hAT-Charlie	MER102c	1.28799	14.5018	-11.2593	9.23116e-06	Yes	0	ENSG00000151746	BICD1
chr4	115591612	115593965	L1PA8A	+	LINE/L1	L1PA8A	8.8079	0.555243	15.8632	9.30447e-06	Yes	0	ENSG00000174607	UGT8
chr1	227978283	227978587	AluSx1	-	SINE/Alu	AluSx1	10.6487	0.670778	15.8751	9.36803e-06	Yes	9357	ENSG00000143740	SNAP47
chr6	56921341	56921634	AluJr	-	SINE/Alu	AluJr	10.2471	39.7141	-3.87562	9.36803e-06	Yes	1319	ENSG00000168116	KIAA1586
chr3	58403580	58403846	AluJb	-	SINE/Alu	AluJb	9.97532	0.575374	17.3371	9.44377e-06	Yes	0	ENSG00000168297	PXK
chr3	8218718	8224403	LTR7|HERVH-int|HERVH-int|HERVH-int|HERVH-int|HERVH-int|HERVH-int|LTR7	+	LTR/ERV1	HERVH-int	7.78549	0.589925	13.1974	9.45274e-06	Yes	-318991	ENSG00000071282	LMCD1
chr15	52407882	52408367	L1MB7	-	LINE/L1	L1MB7	151.484	30.2087	5.01459	9.49758e-06	Yes	-2911	ENSG00000137875	BCL2L10
chr19	23294563	23295243	MER57A-int	+	LTR/ERV1	MER57A-int	1.30776	16.4099	-12.5481	9.52433e-06	Yes	0	ENSG00000183850	ZNF730
chr6	6344231	6344538	MamGypsy2-I	+	LTR/Gypsy	MamGypsy2-I	5.44026	0.394103	13.8041	9.58976e-06	Yes	-22986	ENSG00000124491	F13A1
chr12	125694492	125695232	L2a	-	LINE/L2	L2a	4.37327	0.480847	9.09493	9.63689e-06	Yes	0	ENSG00000139364	TMEM132B
chr16	20040872	20041361	MamRep137	+	DNA/TcMar-Tigger	MamRep137	1.58805	20.3167	-12.7935	9.72853e-06	Yes	1447	ENSG00000180269	GPR139
chr6	3257186	3257522	L2c	-	LINE/L2	L2c	3.19538	23.438	-7.33498	9.73243e-06	Yes	0	ENSG00000180822	PSMG4
chr9	97911522	97911735	L1PA14	+	LINE/L1	L1PA14	7.0098	0.559038	12.539	9.73723e-06	Yes	0	ENSG00000158169	FANCC
chr1	67389126	67389396	L2a	-	LINE/L2	L2a	5.12557	27.8398	-5.43156	9.74092e-06	Yes	0	ENSG00000152763	WDR78
chr6	32868917	32869113	Charlie2b	-	DNA/hAT-Charlie	Charlie2b	15.6516	61.1872	-3.90932	9.82218e-06	Yes	33294	ENSG00000242574	HLA-DMB
chr6	160335122	160335395	L1M3b	-	LINE/L1	L1M3b	8.15978	0.517117	15.7793	9.82218e-06	Yes	6015	ENSG00000130368	MAS1
chr2	181935598	181935779	L2a	-	LINE/L2	L2a	2.24607	17.4823	-7.7835	9.84312e-06	Yes	0	ENSG00000170035	UBE2E3
chr4	21926498	21926709	L2c	+	LINE/L2	L2c	8.35318	0.55695	14.9981	9.85156e-06	Yes	0	ENSG00000185774	KCNIP4
chr5	134907790	134907902	MIR	-	SINE/MIR	MIR	5.16589	0.481711	10.724	9.85924e-06	Yes	0	ENSG00000145824	CXCL14
chr16	88112017	88112512	L1MB7	+	LINE/L1	L1MB7	19.464	1.14844	16.9482	9.88727e-06	Yes	1094	ENSG00000172530	BANP
chr20	44835157	44835492	L2a	+	LINE/L2	L2a	19.7521	1.23111	16.0442	9.88727e-06	Yes	0	ENSG00000149654	CDH22
chr4	122676426	122677862	L1MC2	+	LINE/L1	L1MC2	4.8902	0.481309	10.1602	9.88727e-06	Yes	2227	ENSG00000164112	TMEM155
chr11	1289582	1289932	L1M5	-	LINE/L1	L1M5	30.7978	3.15516	9.76109	1.00504e-05	Yes	5670	ENSG00000078902	TOLLIP
chr5	45255497	45255634	MER5A1	-	DNA/hAT-Charlie	MER5A1	15.5423	0.988319	15.726	1.00696e-05	Yes	3716	ENSG00000164588	HCN1
chr1	55178394	55178732	MLT1A0	+	LTR/ERVL-MaLR	MLT1A0	15.9353	0.706881	22.5432	1.01469e-05	Yes	0	ENSG00000271723	MROH7-TTC4
chr17	46025721	46025897	MER5B	-	DNA/hAT-Charlie	MER5B	50.3881	12.412	4.05963	1.01907e-05	Yes	68	ENSG00000108439	PNPO
chr1	67389428	67389597	L2a	-	LINE/L2	L2a	2.78566	19.3604	-6.95002	1.02189e-05	Yes	0	ENSG00000152763	WDR78
chr6	159064507	159064812	AluSp	-	SINE/Alu	AluSp	2.38146	20.8762	-8.76614	1.02189e-05	Yes	0	ENSG00000146425	DYNLT1
chr16	5027168	5027477	AluSx1	+	SINE/Alu	AluSx1	7.07393	0.434129	16.2946	1.03104e-05	Yes	0	ENSG00000103184	SEC14L5
chr4	608271	609062	L1MCa	-	LINE/L1	L1MCa	15.4302	0.955662	16.146	1.03104e-05	Yes	-10312	ENSG00000133256	PDE6B
chrX	37339302	37344090	HERVIP10FH-int|LTR10F	+	LTR/ERV1	HERVIP10FH-int	17.0147	0.977404	17.408	1.03476e-05	Yes	0	ENSG00000250349	TM4SF2
chr1	45094594	45095032	MLT1H	-	LTR/ERVL-MaLR	MLT1H	9.02587	0.393267	22.951	1.03733e-05	Yes	0	ENSG00000187147	RNF220
chr16	75507373	75507788	MER34A1	+	LTR/ERV1	MER34A1	53.6253	7.27989	7.36622	1.03733e-05	Yes	3162	ENSG00000183196	CHST6
chr16	23938257	23939356	L2c	-	LINE/L2	L2c	3.49399	0.435841	8.01665	1.03967e-05	Yes	0	ENSG00000166501	PRKCB
chr15	20626883	20627743	L1PA16	-	LINE/L1	L1PA16	5.45711	0.4354	12.5336	1.0415e-05	Yes	109352	ENSG00000215405	GOLGA6L6
chr12	108650034	108650218	L2b	+	LINE/L2	L2b	10.6644	0.691489	15.4224	1.05305e-05	Yes	5721	ENSG00000075035	WSCD2
chr3	106234261	106234743	L1MA7	+	LINE/L1	L1MA7	10.9872	0.848375	12.9508	1.05305e-05	Yes	-645866	ENSG00000114423	CBLB
chr6	32870969	32871288	MSTD	+	LTR/ERVL-MaLR	MSTD	63.9627	203.39	-3.17982	1.05305e-05	Yes	31119	ENSG00000242574	HLA-DMB
chr3	58403946	58404132	MIRb	-	SINE/MIR	MIRb	11.8424	0.682834	17.343	1.05641e-05	Yes	0	ENSG00000168297	PXK
chr9	99976776	99982296	LTR7|HERVH-int|HERVH-int|HERVH-int|HERVH-int|HERVH-int|HERVH-int|HERVH-int|LTR7	+	LTR/ERV1	HERVH-int	13.7152	0.945985	14.4983	1.05641e-05	Yes	-18470	ENSG00000197816	CCDC180
chr10	71259314	71259875	L2b	-	LINE/L2	L2b	5.59152	0.393633	14.2049	1.07069e-05	Yes	0	ENSG00000099282	TSPAN15
chr11	116720402	116720937	L2d2	+	LINE/L2	L2d2	15.6427	0.944082	16.5692	1.07153e-05	Yes	0	ENSG00000160584	SIK3
chr1	67389853	67390154	AluSx	-	SINE/Alu	AluSx	6.04002	31.8455	-5.27242	1.08402e-05	Yes	0	ENSG00000152763	WDR78
chr1	195716261	195717209	L1MB8	-	LINE/L1	L1MB8	9.30578	0.481383	19.3313	1.08402e-05	Yes	477701	ENSG00000162687	KCNT2
chr9	131200694	131200809	MIR3	+	SINE/MIR	MIR3	37.488	3.04518	12.3106	1.0881e-05	Yes	1069	ENSG00000167123	CERCAM
chr1	40118619	40118744	MER91C	+	DNA/hAT-Tip100	MER91C	8.53385	0.617655	13.8165	1.09168e-05	Yes	6050	ENSG00000116981	NT5C1A
chr10	49785151	49785846	HAL1	-	LINE/L1	HAL1	6.45788	0.481937	13.3998	1.0934e-05	Yes	0	ENSG00000128805	ARHGAP22
chr3	125803641	125805782	MER4B|MER4E|MER4B-int|MER4B-int|MER4B-int	+	LTR/ERV1	MER4B-int	87.111	19.4244	4.48463	1.10331e-05	Yes	0	ENSG00000114544	SLC41A3
chr2	225825889	225826099	MER103C	+	DNA/hAT-Charlie	MER103C	7.57958	0.502853	15.0732	1.10372e-05	Yes	0	ENSG00000135905	DOCK10
chr6	33376156	33376467	L1MC5a	-	LINE/L1	L1MC5a	0.539538	8.50268	-15.7592	1.10372e-05	Yes	0	ENSG00000237649	KIFC1
chr6	160331661	160332298	L2c	+	LINE/L2	L2c	15.4754	0.671383	23.0501	1.1156e-05	Yes	2554	ENSG00000130368	MAS1
chr1	247199334	247199624	L1M4	+	LINE/L1	L1M4	3.27389	21.7134	-6.63229	1.12286e-05	Yes	0	ENSG00000135747	ZNF670
chr1	155201062	155201338	L2c	-	LINE/L2	L2c	106.647	22.1915	4.80578	1.12366e-05	Yes	2906	ENSG00000177628	GBA
chr12	118473729	118474010	AluSx	+	SINE/Alu	AluSx	35.8562	7.16864	5.00181	1.1297e-05	Yes	0	ENSG00000176871	WSB2
chr2	95882423	95882680	L1MDa	-	LINE/L1	L1MDa	1.20253	12.9375	-10.7586	1.13496e-05	Yes	32359	ENSG00000163067	ZNF2
chr14	101319925	101320152	L1ME4c	-	LINE/L1	L1ME4c	77.4447	7.01497	11.0399	1.14113e-05	Yes	-24389	ENSG00000267918	AL117190.2
chr5	175137021	175137289	L2b	+	LINE/L2	L2b	70.1611	13.3635	5.2502	1.14113e-05	Yes	23777	ENSG00000113749	HRH2
chr21	15234189	15236197	MSTA|MSTA-int|MSTA|MSTA|MSTA-int|MSTA-int	-	LTR/ERVL-MaLR	MSTA-int	4.42002	0.394822	11.195	1.14157e-05	Yes	-180731	ENSG00000269011	AL050303.1
chr16	66601496	66602292	L1M5	+	LINE/L1	L1M5	14.3223	89.0167	-6.21524	1.14367e-05	Yes	0	ENSG00000254788	CKLF-CMTM1
chr21	45840667	45840871	MIRb	-	SINE/MIR	MIRb	4.38991	0.435715	10.0752	1.15259e-05	Yes	0	ENSG00000142185	TRPM2
chr19	18219663	18220066	L2b	-	LINE/L2	L2b	3.49164	0.394884	8.84219	1.1888e-05	Yes	0	ENSG00000099308	MAST3
chr3	143516287	143524767	LTR7|HERVH-int|LTR7	+	LTR/ERV1	HERVH-int	10.6241	0.68927	15.4136	1.1888e-05	Yes	0	ENSG00000181804	SLC9A9
chr9	19636421	19636731	AluSx1	-	SINE/Alu	AluSx1	7.87442	0.502404	15.6735	1.1888e-05	Yes	0	ENSG00000155886	SLC24A2
chr9	138602886	138602982	L1MD	-	LINE/L1	L1MD	3.54677	0.395562	8.9664	1.19061e-05	Yes	0	ENSG00000107147	KCNT1
chr6	160336703	160336842	LTR16C	-	LTR/ERVL	LTR16C	17.4493	0.750426	23.2525	1.19473e-05	Yes	7596	ENSG00000130368	MAS1
chr14	81636014	81637726	L1P4a	+	LINE/L1	L1P4a	25.014	2.96784	8.42835	1.19702e-05	Yes	4071	ENSG00000165417	GTF2A1
chr2	141183963	141189971	LTR7|HERVH-int|HERVH-int|HERVH-int|HERVH-int|HERVH-int|HERVH-int|LTR7	+	LTR/ERV1	HERVH-int	15.5207	0.848711	18.2874	1.19759e-05	Yes	0	ENSG00000168702	LRP1B
chr1	45092737	45093042	AluSg	+	SINE/Alu	AluSg	4.05394	0.395754	10.2436	1.2031e-05	Yes	0	ENSG00000187147	RNF220
chr5	150651170	150651353	L1MC4a	+	LINE/L1	L1MC4a	37.8568	3.29506	11.489	1.20361e-05	Yes	1170	ENSG00000196743	GM2A
chr16	66601061	66601481	L1PA7	-	LINE/L1	L1PA7	10.6225	44.0069	-4.14281	1.20754e-05	Yes	0	ENSG00000254788	CKLF-CMTM1
chr21	46965089	46965495	MSTB	+	LTR/ERVL-MaLR	MSTB	4.35456	0.394044	11.051	1.21434e-05	Yes	-765	ENSG00000173638	SLC19A1
chr2	2729124	2730362	L2	+	LINE/L2	L2	7.14869	0.560429	12.7557	1.2276e-05	Yes	-394093	ENSG00000186487	MYT1L
chr7	97781943	97782886	L2a	-	LINE/L2	L2a	3.10256	0.435998	7.116	1.23454e-05	Yes	0	ENSG00000164715	LMTK2
chr5	178512564	178513230	L1MB8	+	LINE/L1	L1MB8	22.2851	106.117	-4.76176	1.23557e-05	Yes	2027	ENSG00000177932	ZNF354C
chr21	15273665	15275330	MSTA|MSTA-int	-	LTR/ERVL-MaLR	MSTA-int	5.96079	0.393302	15.1558	1.23767e-05	Yes	205805	ENSG00000188992	LIPI
chr10	47006927	47007318	THE1D	-	LTR/ERVL-MaLR	THE1D	6.02741	54.2327	-8.99768	1.24683e-05	Yes	1285	ENSG00000204175	GPRIN2
chr17	52489140	52494163	HERVH-int|HERVH-int|LTR7C	+	LTR/ERV1	HERVH-int	4.21839	0.395929	10.6544	1.24718e-05	Yes	-482586	ENSG00000141198	TOM1L1
chr16	72482343	72487601	L1MA2	-	LINE/L1	L1MA2	6.99041	57.6068	-8.24082	1.2483e-05	Yes	-271567	ENSG00000118557	PMFBP1
chr4	159185680	159188839	L1MC1	-	LINE/L1	L1MC1	9.97744	0.433243	23.0297	1.2483e-05	Yes	9118	ENSG00000164124	TMEM144
chr7	138709767	138709927	L4_B_Mam	-	LINE/RTE-X	L4_B_Mam	2.32486	16.239	-6.98495	1.25663e-05	Yes	526	ENSG00000146858	ZC3HAV1L
chr7	4940489	4940779	AluSq2	+	SINE/Alu	AluSq2	41.4336	6.40624	6.46769	1.25823e-05	Yes	4842	ENSG00000136297	MMD2
chr9	131200437	131200612	AluSx	-	SINE/Alu	AluSx	14.1713	0.785303	18.0457	1.25931e-05	Yes	812	ENSG00000167123	CERCAM
chr7	4938176	4938245	MLT1A0	+	LTR/ERVL-MaLR	MLT1A0	23.2067	2.14771	10.8053	1.26127e-05	Yes	7376	ENSG00000136297	MMD2
chr9	136443188	136443272	MIR3	-	SINE/MIR	MIR3	165.027	35.7385	4.61762	1.26278e-05	Yes	808	ENSG00000196990	FAM163B
chr1	203105998	203106772	L2a	-	LINE/L2	L2a	5.14166	0.482533	10.6556	1.26391e-05	Yes	0	ENSG00000163485	ADORA1
chr4	40166040	40166128	L3	+	LINE/CR1	L3	1.30923	14.5295	-11.0977	1.26964e-05	Yes	6169	ENSG00000078177	N4BP2
chr6	165221026	165227782	MLT2A2|HERVL-int|MLT2A2	-	LTR/ERVL	HERVL-int	4.71799	0.481921	9.78996	1.28426e-05	Yes	465372	ENSG00000112539	C6orf118
chr19	41061549	41061849	AluJb	+	SINE/Alu	AluJb	26.13	1.09945	23.7665	1.32695e-05	Yes	0	ENSG00000160460	SPTBN4
chr22	31366081	31366259	Charlie4z	+	DNA/hAT-Charlie	Charlie4z	13.2056	66.5608	-5.04033	1.32788e-05	Yes	-1798	ENSG00000133422	MORC2
chr3	140322184	140323157	L1ME1	-	LINE/L1	L1ME1	8.04687	0.642593	12.5225	1.32788e-05	Yes	25946	ENSG00000158258	CLSTN2
chr7	154742150	154742840	L1MC1	+	LINE/L1	L1MC1	20.6516	1.17165	17.6261	1.32788e-05	Yes	0	ENSG00000157212	PAXIP1
chr1	205032472	205032785	AluSx	+	SINE/Alu	AluSx	10.2409	0.552311	18.542	1.35514e-05	Yes	0	ENSG00000184144	CNTN2
chr16	72493302	72493602	AluY	-	SINE/Alu	AluY	1.42404	12.147	-8.53002	1.35514e-05	Yes	-282526	ENSG00000118557	PMFBP1
chr2	112797806	112798251	LTR7	+	LTR/ERV1	LTR7	17.8677	1.42265	12.5594	1.36052e-05	Yes	10669	ENSG00000153208	MERTK
chr20	25050236	25050549	LTR16E2	-	LTR/ERVL	LTR16E2	2.34982	0.39586	5.93598	1.37474e-05	Yes	973	ENSG00000100987	VSX1
chr12	13156837	13157143	AluSx1	-	SINE/Alu	AluSx1	24.3814	2.6566	9.17768	1.38401e-05	Yes	-3631	ENSG00000013583	HEBP1
chr4	21938985	21939076	L2	+	LINE/L2	L2	3.41195	0.395321	8.63082	1.39646e-05	Yes	0	ENSG00000185774	KCNIP4
chr14	102303465	102303783	AluSp	-	SINE/Alu	AluSp	19.1506	2.56565	7.46422	1.40006e-05	Yes	0	ENSG00000078304	PPP2R5C
chr5	109043464	109044161	L2b	-	LINE/L2	L2b	4.2315	0.480788	8.80117	1.40142e-05	Yes	0	ENSG00000112893	MAN2A1
chr15	40352888	40353344	L2-3_Crp	-	LINE/L2	L2-3_Crp	22.804	1.97331	11.5562	1.4029e-05	Yes	-21500	ENSG00000140319	SRP14
chr2	65274979	65275521	MLT1F2	-	LTR/ERVL-MaLR	MLT1F2	56.2391	15.8227	3.55432	1.40903e-05	Yes	-7980	ENSG00000011523	CEP68
chr1	46690450	46690732	AluSz	-	SINE/Alu	AluSz	13.5213	0.986102	13.7119	1.42031e-05	Yes	3518	ENSG00000171357	LURAP1
chr12	99143560	99143953	L2a	-	LINE/L2	L2a	46.4858	5.5681	8.3486	1.42274e-05	Yes	0	ENSG00000185046	ANKS1B
chr9	138602476	138602574	OldhAT1	-	DNA/hAT-Ac	OldhAT1	3.73357	0.395571	9.43843	1.44609e-05	Yes	0	ENSG00000107147	KCNT1
chr16	27725995	27727798	L1MB7	+	LINE/L1	L1MB7	18.9075	1.57084	12.0365	1.44641e-05	Yes	0	ENSG00000047578	KIAA0556
chr3	106234926	106237791	L1PA12	+	LINE/L1	L1PA12	47.1469	4.24452	11.1077	1.45137e-05	Yes	-646531	ENSG00000114423	CBLB
chr3	139842872	139845492	L2a	-	LINE/L2	L2a	5.23513	0.479017	10.9289	1.45191e-05	Yes	0	ENSG00000158258	CLSTN2
chr9	139662184	139662516	L1ME1	+	LINE/L1	L1ME1	4.4861	0.395246	11.3501	1.47506e-05	Yes	-1478	ENSG00000177984	LCN15
chr10	14888511	14888745	MIRc	+	SINE/MIR	MIRc	31.8038	96.8061	-3.04385	1.48163e-05	Yes	0	ENSG00000187522	HSPA14
chr14	105183024	105183328	AluSx3	-	SINE/Alu	AluSx3	13.6963	1.10375	12.4089	1.48163e-05	Yes	0	ENSG00000203485	INF2
chr10	88805781	88806203	L1M4	-	LINE/L1	L1M4	22.5284	1.22769	18.3502	1.48948e-05	Yes	4041	ENSG00000148672	GLUD1
chr13	100487444	100487875	MLT1J	-	LTR/ERVL-MaLR	MLT1J	6.04192	0.437993	13.7946	1.48948e-05	Yes	0	ENSG00000125246	CLYBL
chr14	105115911	105116484	Charlie2b	-	DNA/hAT-Charlie	Charlie2b	16.151	0.96322	16.7677	1.48948e-05	Yes	-39460	ENSG00000203485	INF2
chr22	34587059	34587301	L2a	-	LINE/L2	L2a	3.02577	0.393491	7.68954	1.48948e-05	Yes	-268231	ENSG00000133424	LARGE
chr5	72570468	72570567	MIR3	-	SINE/MIR	MIR3	5.56271	0.504816	11.0193	1.48948e-05	Yes	99499	ENSG00000164325	TMEM174
chr2	220398995	220399420	LTR33	-	LTR/ERVL	LTR33	11.21	0.622392	18.0112	1.49342e-05	Yes	0	ENSG00000072182	ASIC4
chr16	5047620	5048001	MLT1C2	-	LTR/ERVL-MaLR	MLT1C2	3.41886	0.394116	8.67474	1.4964e-05	Yes	0	ENSG00000103184	SEC14L5
chr14	101317364	101317491	MIRc	+	SINE/MIR	MIRc	150.828	14.4245	10.4564	1.50493e-05	Yes	-21828	ENSG00000267918	AL117190.2
chr20	47276833	47277430	L1M5	+	LINE/L1	L1M5	14.036	0.74639	18.8051	1.51358e-05	Yes	0	ENSG00000124126	PREX1
chr7	84988981	84991262	THE1C|THE1C-int|THE1C	+	LTR/ERVL-MaLR	THE1C-int	4.61653	0.483084	9.55637	1.51358e-05	Yes	-172811	ENSG00000153993	SEMA3D
chr1	205212541	205214190	L2	-	LINE/L2	L2	11.1498	0.644853	17.2904	1.52058e-05	Yes	0	ENSG00000133069	TMCC2
chr14	101323320	101323382	L2a	+	LINE/L2	L2a	114.108	11.7254	9.73176	1.5213e-05	Yes	23611	ENSG00000254656	RTL1
chr1	230840628	230840814	L1MB3	+	LINE/L1	L1MB3	4.76156	0.393903	12.0882	1.53121e-05	Yes	0	ENSG00000135744	AGT
chr20	61889464	61889824	MLT1C2	-	LTR/ERVL-MaLR	MLT1C2	19.2353	2.40178	8.00878	1.53463e-05	Yes	0	ENSG00000101198	NKAIN4
chr6	160335663	160336148	L1M3b	-	LINE/L1	L1M3b	22.5093	0.706364	31.8664	1.53745e-05	Yes	6556	ENSG00000130368	MAS1
chr10	88802272	88802505	L1M4	-	LINE/L1	L1M4	17.524	1.08296	16.1816	1.53793e-05	Yes	7739	ENSG00000148672	GLUD1
chr8	42985705	42986092	MLT1A1	-	LTR/ERVL-MaLR	MLT1A1	42.7798	164.247	-3.83936	1.53815e-05	Yes	7129	ENSG00000185900	POMK
chr8	70755536	70761658	L1PA5	+	LINE/L1	L1PA5	1.8978	20.8902	-11.0076	1.53815e-05	Yes	-8238	ENSG00000137571	SLCO5A1
chr17	79349065	79349373	AluSx	-	SINE/Alu	AluSx	15.7772	0.95479	16.5243	1.55425e-05	Yes	-19903	ENSG00000263053	RP11-1055B8.6
chr12	113566830	113567277	L2b	-	LINE/L2	L2b	9.16706	0.558163	16.4236	1.55837e-05	Yes	0	ENSG00000111344	RASAL1
chr19	20337004	20337948	L1P2	-	LINE/L1	L1P2	2.36977	17.1363	-7.2312	1.55837e-05	Yes	25706	ENSG00000256229	ZNF486
chr9	139690985	139691882	LTR5B	+	LTR/ERVK	LTR5B	158.478	36.3685	4.35758	1.56985e-05	Yes	0	ENSG00000272896	RP11-216L13.17
chr4	55238	56751	LTR70	+	LTR/ERV1	LTR70	3.41816	20.031	-5.86018	1.57229e-05	Yes	0	ENSG00000197701	ZNF595
chr2	99367597	99368143	LTR29	+	LTR/ERV1	LTR29	12.8859	0.786555	16.3827	1.5859e-05	Yes	-20009	ENSG00000071073	MGAT4A
chr7	123637667	123638407	L2	-	LINE/L2	L2	4.21043	0.395881	10.6356	1.5859e-05	Yes	26200	ENSG00000106304	SPAM1
chr15	41875494	41875626	AluJr	-	SINE/Alu	AluJr	16.953	1.74768	9.70028	1.60192e-05	Yes	3959	ENSG00000092445	TYRO3
chr2	127815721	127815884	MIRb	+	SINE/MIR	MIRb	23.9027	1.61802	14.7729	1.60192e-05	Yes	0	ENSG00000136717	BIN1
chr21	15240306	15241211	MSTA-int|MSTA|MSTA-int|MSTA|MSTA|MSTA-int	-	LTR/ERVL-MaLR	MSTA-int	3.59415	0.39591	9.07821	1.60192e-05	Yes	-186848	ENSG00000269011	AL050303.1
chr18	4002321	4002765	Tigger2a	+	DNA/TcMar-Tigger	Tigger2a	4.93594	0.434377	11.3633	1.60662e-05	Yes	0	ENSG00000170579	DLGAP1
chr14	58581481	58582792	L1PA15	+	LINE/L1	L1PA15	2.55013	21.3858	-8.38617	1.61642e-05	Yes	0	ENSG00000139971	C14orf37
chr11	64456424	64456641	MIRc	+	SINE/MIR	MIRc	8.55195	0.605602	14.1214	1.66428e-05	Yes	0	ENSG00000110076	NRXN2
chr14	24090655	24097283	MER50|MER50-int|MER50-int|MER50-int|MER50	+	LTR/ERV1	MER50-int	56.0588	8.49459	6.59935	1.67029e-05	Yes	-2042	ENSG00000100867	DHRS2
chr2	233206077	233206382	HAL1	+	LINE/L1	HAL1	4.71462	22.6399	-4.80205	1.67029e-05	Yes	0	ENSG00000144535	DIS3L2
chr1	44975278	44975578	AluSz6	+	SINE/Alu	AluSz6	8.60891	0.503437	17.1003	1.67763e-05	Yes	0	ENSG00000187147	RNF220
chr2	208469316	208470220	L1MB5	-	LINE/L1	L1MB5	12.7629	47.6055	-3.73	1.67763e-05	Yes	0	ENSG00000144401	METTL21A
chr6	28084335	28084652	AluJr4	+	SINE/Alu	AluJr4	8.0789	0.599148	13.484	1.68096e-05	Yes	-7687	ENSG00000196812	ZSCAN16
chr7	99766646	99766945	AluSq2	+	SINE/Alu	AluSq2	0.784539	8.84217	-11.2705	1.68277e-05	Yes	-274	ENSG00000197093	GAL3ST4
chr3	44687595	44687759	MIRb	+	SINE/MIR	MIRb	4.95531	29.3045	-5.91376	1.68891e-05	Yes	0	ENSG00000186448	ZNF197
chr7	55524647	55528304	L1MA4A	-	LINE/L1	L1MA4A	51.6419	226.559	-4.3871	1.68952e-05	Yes	0	ENSG00000154978	VOPP1
chr21	15250555	15252647	MSTA|MSTA-int|MSTA|MSTA|MSTA-int|MSTA-int	-	LTR/ERVL-MaLR	MSTA-int	5.94701	0.435141	13.6669	1.69435e-05	Yes	-197097	ENSG00000269011	AL050303.1
chr19	9650019	9651409	LTR7C|HERVH-int|HERVH-int	+	LTR/ERV1	HERVH-int	56.2868	11.6061	4.84978	1.71682e-05	Yes	-717	ENSG00000130818	ZNF426
chr20	60324008	60324834	L1ME3B	+	LINE/L1	L1ME3B	13.1303	0.810237	16.2055	1.72345e-05	Yes	0	ENSG00000179242	CDH4
chr2	101633542	101634040	Tigger3b	-	DNA/TcMar-Tigger	Tigger3b	2.89362	18.5942	-6.42592	1.72827e-05	Yes	0	ENSG00000071082	RPL31
chr19	36826643	36826936	AluSx1	-	SINE/Alu	AluSx1	15.7307	55.7108	-3.54154	1.73828e-05	Yes	227	ENSG00000142065	ZFP14
chr8	105339581	105340272	LTR8A	-	LTR/ERV1	LTR8A	3.30201	0.438298	7.53371	1.75799e-05	Yes	2281	ENSG00000147647	DPYS
chr10	3337065	3337373	AluSx1	+	SINE/Alu	AluSx1	3.72452	0.395692	9.41267	1.77033e-05	Yes	-122063	ENSG00000107959	PITRM1
chr20	45073624	45074759	MER52A	-	LTR/ERV1	MER52A	13.4177	1.34328	9.98881	1.77376e-05	Yes	-11921	ENSG00000062598	ELMO2
chr10	46967107	46967163	L2b	+	LINE/L2	L2b	36.425	5.36173	6.79352	1.77717e-05	Yes	0	ENSG00000204176	SYT15
chr3	40503865	40504166	AluYk4	-	SINE/Alu	AluYk4	12.762	47.5993	-3.72976	1.78301e-05	Yes	5	ENSG00000188846	RPL14
chr19	6708146	6708459	AluSz	-	SINE/Alu	AluSz	7.49912	0.436036	17.1984	1.80781e-05	Yes	0	ENSG00000125730	C3
chr1	111139057	111139344	Tigger10	+	DNA/TcMar-Tigger	Tigger10	91.8513	19.7912	4.64101	1.81832e-05	Yes	0	ENSG00000177301	KCNA2
chr5	63629682	63630343	MER76	-	LTR/ERVL	MER76	4.21582	38.0682	-9.02986	1.8405e-05	Yes	0	ENSG00000164197	RNF180
chr13	44669115	44669706	MER50B|MER50B	-	LTR/ERV1	MER50B	15.2368	0.930994	16.3662	1.84244e-05	Yes	47974	ENSG00000139656	SMIM2
chr20	1873431	1873680	L2b	+	LINE/L2	L2b	7.13255	0.454509	15.6929	1.84508e-05	Yes	-1475	ENSG00000198053	SIRPA
chr9	114312941	114313295	HAL1	-	LINE/L1	HAL1	58.1575	11.2627	5.16374	1.85187e-05	Yes	0	ENSG00000173258	ZNF483
chr12	108275649	108275753	L1PB4	-	LINE/L1	L1PB4	12.6295	0.752416	16.7853	1.8573e-05	Yes	105229	ENSG00000187855	ASCL4
chr9	112577081	112578256	L2	-	LINE/L2	L2	2.91701	0.43586	6.69254	1.87367e-05	Yes	0	ENSG00000243444	PALM2
chr4	21939594	21940046	L2c	+	LINE/L2	L2c	4.87521	0.47888	10.1805	1.88601e-05	Yes	0	ENSG00000185774	KCNIP4
chr6	72053542	72053890	LTR16B1|LTR16B1	-	LTR/ERVL	LTR16B1	6.79731	0.554369	12.2613	1.92845e-05	Yes	34890	ENSG00000119900	OGFRL1
chr7	13143833	13144043	LTR102_Mam	+	LTR/ERVL	LTR102_Mam	4.57655	0.393848	11.6201	1.93466e-05	Yes	413275	ENSG00000122644	ARL4A
chr3	107644470	107645248	L2b	+	LINE/L2	L2b	12.778	0.918782	13.9075	1.93498e-05	Yes	114300	ENSG00000114439	BBX
chr12	300873	301127	MLT1L	+	LTR/ERVL-MaLR	MLT1L	11.3448	0.886624	12.7955	1.93903e-05	Yes	0	ENSG00000111181	SLC6A12
chr14	68031393	68031707	AluJb	-	SINE/Alu	AluJb	20.7478	0.894893	23.1847	1.94557e-05	Yes	0	ENSG00000054690	PLEKHH1
chr10	71264850	71265320	MER20B	-	DNA/hAT-Charlie	MER20B	4.00264	0.437554	9.14775	1.95397e-05	Yes	0	ENSG00000099282	TSPAN15
chr17	42985947	42986226	AluSx1	+	SINE/Alu	AluSx1	10.3123	0.676958	15.2333	1.9576e-05	Yes	0	ENSG00000131095	GFAP
chr10	119243899	119244209	MLT1J	-	LTR/ERVL-MaLR	MLT1J	171.326	27.9474	6.13031	1.96869e-05	Yes	-57747	ENSG00000170370	EMX2
chr22	45270728	45272750	L1MEf	+	LINE/L1	L1MEf	2.70235	20.7589	-7.6818	1.9739e-05	Yes	4293	ENSG00000056487	PHF21B
chr12	34181140	34181789	L1MA7	-	LINE/L1	L1MA7	3.80482	19.7413	-5.1885	1.98598e-05	Yes	0	ENSG00000139133	ALG10
chr9	99909128	99911487	MSTA-int|MSTA|MSTA-int|MSTA|MSTA|MSTA-int	-	LTR/ERVL-MaLR	MSTA-int	6.77516	0.582282	11.6355	1.99828e-05	Yes	-89279	ENSG00000197816	CCDC180
chr6	46117163	46118389	L1MEg	+	LINE/L1	L1MEg	29.6653	1.93227	15.3526	1.99929e-05	Yes	2728	ENSG00000001561	ENPP4
chr21	15244347	15246060	MSTA|MSTA-int|MSTA-int	-	LTR/ERVL-MaLR	MSTA-int	5.0524	0.395486	12.7752	2.00088e-05	Yes	-190889	ENSG00000269011	AL050303.1
chr5	136090590	136090793	MamTip2b	-	DNA/hAT-Tip100	MamTip2b	7.67176	0.580177	13.2231	2.01481e-05	Yes	220195	ENSG00000152377	SPOCK1
chr1	220875273	220875862	LTR64	-	LTR/ERV1	LTR64	10.3347	0.911877	11.3334	2.01594e-05	Yes	2775	ENSG00000162817	C1orf115
chr16	24208409	24209045	L2a	-	LINE/L2	L2a	2.74747	0.395769	6.9421	2.03917e-05	Yes	0	ENSG00000166501	PRKCB
chr6	21982306	21983055	L1MB7	-	LINE/L1	L1MB7	1.75741	16.715	-9.51119	2.04935e-05	Yes	304426	ENSG00000172179	PRL
chr12	2233938	2234441	L2	-	LINE/L2	L2	4.10286	0.455165	9.01401	2.07333e-05	Yes	0	ENSG00000151067	CACNA1C
chr20	1873208	1873364	L2b	+	LINE/L2	L2b	6.69155	0.454695	14.7166	2.07333e-05	Yes	-1791	ENSG00000198053	SIRPA
chr1	197393273	197394042	L3	-	LINE/CR1	L3	3.03774	35.3042	-11.6219	2.0737e-05	Yes	0	ENSG00000134376	CRB1
chr19	4585825	4585959	L2a	+	LINE/L2	L2a	29.402	3.26822	8.99633	2.08119e-05	Yes	-26006	ENSG00000167680	SEMA6B
chr16	14244195	14245336	Tigger2b_Pri	-	DNA/TcMar-Tigger	Tigger2b_Pri	19.8425	97.116	-4.89433	2.08337e-05	Yes	0	ENSG00000186260	MKL2
chr16	70813254	70813544	L2c	+	LINE/L2	L2c	12.2667	0.991039	12.3776	2.08337e-05	Yes	0	ENSG00000103043	VAC14
chr9	138601534	138601826	AluSx	-	SINE/Alu	AluSx	6.68648	0.482921	13.8459	2.08392e-05	Yes	0	ENSG00000107147	KCNT1
chrX	101895326	101896194	L1MB5	-	LINE/L1	L1MB5	14.8055	58.7074	-3.96523	2.08392e-05	Yes	-10101	ENSG00000198932	GPRASP1
chr1	230451008	230451364	L3	-	LINE/CR1	L3	108.836	22.8926	4.75421	2.08802e-05	Yes	6029	ENSG00000177614	PGBD5
chr4	88408082	88410700	L1PA7	-	LINE/L1	L1PA7	29.6577	1.98812	14.9174	2.08907e-05	Yes	0	ENSG00000152583	SPARCL1
chr9	109619703	109619996	AluSz	+	SINE/Alu	AluSz	1.26514	13.6574	-10.7952	2.08907e-05	Yes	-5383	ENSG00000148143	ZNF462
chr2	73280025	73280327	AluSz6	+	SINE/Alu	AluSz6	4.99539	0.432653	11.5459	2.09029e-05	Yes	0	ENSG00000144040	SFXN5
chr3	170399547	170407095	LTR7|HERVH-int|HERVH-int|HERVH-int|HERVH-int|HERVH-int|LTR7	-	LTR/ERV1	HERVH-int	6.76548	0.43241	15.646	2.1004e-05	Yes	0	ENSG00000013297	CLDN11
chr1	45045433	45045729	AluJb	+	SINE/Alu	AluJb	4.1915	0.395621	10.5947	2.10888e-05	Yes	0	ENSG00000187147	RNF220
chr19	9402963	9403314	MLT1K	+	LTR/ERVL-MaLR	MLT1K	14.824	45.9048	-3.09666	2.10888e-05	Yes	1638	ENSG00000196110	ZNF699
chr1	205524118	205524497	MSTA	-	LTR/ERVL-MaLR	MSTA	28.3502	1.84848	15.337	2.11743e-05	Yes	-13517	ENSG00000174514	MFSD4
chr1	230936415	230936564	MER5B	+	DNA/hAT-Charlie	MER5B	6.76107	0.586203	11.5337	2.1205e-05	Yes	0	ENSG00000135773	CAPN9
chr22	34587714	34587992	AluSx3	-	SINE/Alu	AluSx3	5.92642	0.433997	13.6554	2.13104e-05	Yes	-268886	ENSG00000133424	LARGE
chr17	57507853	57508161	AluSx3	-	SINE/Alu	AluSx3	13.7126	0.864331	15.865	2.14781e-05	Yes	28764	ENSG00000175155	YPEL2
chr6	84008691	84009818	L1PREC2	-	LINE/L1	L1PREC2	5.50886	0.434483	12.6791	2.16683e-05	Yes	0	ENSG00000065833	ME1
chr10	81905682	81906266	MER44B	+	DNA/TcMar-Tigger	MER44B	13.7052	0.842884	16.2599	2.20034e-05	Yes	568	ENSG00000189129	PLAC9
chr3	193117366	193117656	AluY	+	SINE/Alu	AluY	26.5753	2.64286	10.0555	2.2069e-05	Yes	2211	ENSG00000127249	ATP13A4
chr14	68030123	68030448	AluSx	-	SINE/Alu	AluSx	13.1795	0.733628	17.9648	2.2117e-05	Yes	0	ENSG00000054690	PLEKHH1
chr7	37993918	37994349	L1PA7	+	LINE/L1	L1PA7	15.7124	1.28869	12.1925	2.2125e-05	Yes	0	ENSG00000106483	SFRP4
chr6	10997319	10998131	L1MC5a	-	LINE/L1	L1MC5a	1.38483	12.5526	-9.06436	2.22451e-05	Yes	0	ENSG00000197977	ELOVL2
chr5	149647731	149648229	L2a	+	LINE/L2	L2a	5.39304	0.49969	10.7928	2.23048e-05	Yes	0	ENSG00000070808	CAMK2A
chr5	132115008	132115177	MER103C	+	DNA/hAT-Charlie	MER103C	25.5292	2.67698	9.53656	2.23272e-05	Yes	0	ENSG00000164402	SEPT8
chr7	91738970	91739263	AluSg	+	SINE/Alu	AluSg	15.5513	59.3341	-3.81538	2.23272e-05	Yes	0	ENSG00000127914	AKAP9
chr1	153578254	153578488	LTR9B	+	LTR/ERV1	LTR9B	10.3899	0.908108	11.4413	2.23324e-05	Yes	875	ENSG00000188643	S100A16
chr17	61793456	61793755	AluSz	-	SINE/Alu	AluSz	4.4668	27.7677	-6.21646	2.23992e-05	Yes	0	ENSG00000266173	STRADA
chr10	50953111	50953308	L2c	+	LINE/L2	L2c	18.2518	2.45173	7.44446	2.24794e-05	Yes	0	ENSG00000197444	OGDHL
chr5	123639451	123645169	LTR7|HERVH-int|HERVH-int|HERVH-int|HERVH-int|HERVH-int|LTR7	+	LTR/ERV1	HERVH-int	9.26027	0.670751	13.8058	2.24794e-05	Yes	327440	ENSG00000168916	ZNF608
chr2	170568760	170574103	HERVL18-int|HERVL18-int|HERVL18-int|LTR18B	-	LTR/ERVL	HERVL18-int	28.037	2.098	13.3637	2.2527e-05	Yes	0	ENSG00000213160	KLHL23
chr6	3255597	3255831	HERV16-int	-	LTR/ERVL	HERV16-int	1.07437	10.6149	-9.88012	2.25589e-05	Yes	0	ENSG00000180822	PSMG4
chr5	140490954	140494107	L1PA4	-	LINE/L1	L1PA4	2.2297	18.0457	-8.09335	2.26221e-05	Yes	-7475	ENSG00000081818	PCDHB4
chrX	139863887	139864100	MER58A	+	DNA/hAT-Charlie	MER58A	17.0753	1.31803	12.9552	2.26221e-05	Yes	1326	ENSG00000184258	CDR1
chr19	30031570	30032368	L2c	-	LINE/L2	L2c	8.44517	0.639796	13.1998	2.26289e-05	Yes	0	ENSG00000187135	VSTM2B
chr19	48587073	48587284	MIR	+	SINE/MIR	MIR	12.2958	0.730665	16.8283	2.26289e-05	Yes	0	ENSG00000105499	PLA2G4C
chr20	44022847	44024094	LTR2752	+	LTR/ERV1	LTR2752	18.1544	1.32924	13.6577	2.26289e-05	Yes	0	ENSG00000254806	SYS1-DBNDD2
chr14	68031958	68032207	AluJr	-	SINE/Alu	AluJr	17.0409	0.73345	23.2339	2.27648e-05	Yes	0	ENSG00000054690	PLEKHH1
chr17	37794107	37794907	L2c	+	LINE/L2	L2c	7.47658	0.553966	13.4965	2.27648e-05	Yes	0	ENSG00000131748	STARD3
chr4	21444035	21444988	L2a	+	LINE/L2	L2a	5.90852	0.526484	11.2226	2.27648e-05	Yes	0	ENSG00000185774	KCNIP4
chr1	195717932	195718684	L1MB8	-	LINE/L1	L1MB8	4.58794	0.395896	11.5887	2.28762e-05	Yes	476226	ENSG00000162687	KCNT2
chr12	50285757	50286916	L2	+	LINE/L2	L2	10.1263	0.666031	15.2039	2.28814e-05	Yes	0	ENSG00000135472	FAIM2
chr11	49161114	49164832	L1P2	+	LINE/L1	L1P2	22.4542	1.87014	12.0067	2.30914e-05	Yes	3356	ENSG00000086205	FOLH1
chr13	77462434	77463128	L2a	+	LINE/L2	L2a	18.9486	1.24586	15.2092	2.31047e-05	Yes	-1895	ENSG00000178695	KCTD12
chr15	32083896	32084760	L2	+	LINE/L2	L2	4.3285	0.434641	9.95881	2.31726e-05	Yes	0	ENSG00000169918	OTUD7A
chr4	24324907	24329833	LTR7Y|HERVH-int|HERVH-int|HERVH-int|HERVH-int|HERVH-int|HERVH-int|LTR7Y	+	LTR/ERV1	HERVH-int	10.9317	0.744068	14.6919	2.34785e-05	Yes	189232	ENSG00000109606	DHX15
chr6	67366376	67367848	L1PA5	+	LINE/L1	L1PA5	7.89142	0.433983	18.1837	2.34989e-05	Yes	-949259	ENSG00000188107	EYS
chr2	95887041	95887186	L1MEd	-	LINE/L1	L1MEd	3.74775	27.8675	-7.43579	2.3515e-05	Yes	36977	ENSG00000163067	ZNF2
chr1	20006496	20006719	MIRb	+	SINE/MIR	MIRb	23.3537	2.71137	8.61324	2.36246e-05	Yes	442	ENSG00000158748	HTR6
chr1	48978917	48985928	MER9a1|HERVK9-int|MER9a1	-	LTR/ERVK	HERVK9-int	20.89	2.35325	8.8771	2.36777e-05	Yes	12600	ENSG00000186094	AGBL4
chr14	58588999	58592862	HERV17-int|HERV17-int|HERV17-int|LTR17	+	LTR/ERV1	HERV17-int	1.99164	20.4631	-10.2745	2.36777e-05	Yes	0	ENSG00000139971	C14orf37
chr2	104699183	104700201	L1MC1	-	LINE/L1	L1MC1	0.811834	13.7877	-16.9834	2.36777e-05	Yes	-771769	ENSG00000198914	POU3F3
chr22	45272751	45273099	LTR41B	-	LTR/ERVL	LTR41B	2.75221	21.3224	-7.74737	2.3693e-05	Yes	3944	ENSG00000056487	PHF21B
chr10	1098337	1098952	Tigger1	-	DNA/TcMar-Tigger	Tigger1	8.39838	44.9865	-5.35657	2.374e-05	Yes	0	ENSG00000047056	WDR37
chr19	36877845	36878520	MSTD-int|MSTD	+	LTR/ERVL-MaLR	MSTD-int	11.6486	49.6695	-4.26399	2.374e-05	Yes	0	ENSG00000181007	ZFP82
chr15	26002856	26004387	LTR10F|LTR10F|LTR10F|LTR10F|LTR10F|LTR10F|LTR10F|LTR10F|LTR10F|LTR10F	+	LTR/ERV1	LTR10F	4.48087	0.432277	10.3657	2.39146e-05	Yes	0	ENSG00000206190	ATP10A
chr1	66602104	66602407	AluSx1	+	SINE/Alu	AluSx1	4.55018	0.43612	10.4333	2.39359e-05	Yes	0	ENSG00000184588	PDE4B
chr6	40462248	40464610	L2a	+	LINE/L2	L2a	9.3989	0.642796	14.6219	2.39359e-05	Yes	0	ENSG00000156564	LRFN2
chr4	21931196	21931786	L2c	+	LINE/L2	L2c	6.69331	0.479848	13.9488	2.39391e-05	Yes	0	ENSG00000185774	KCNIP4
chr4	88404241	88408040	L1PA7	-	LINE/L1	L1PA7	29.6844	2.28302	13.0023	2.40636e-05	Yes	0	ENSG00000152583	SPARCL1
chr1	46688892	46689183	AluJb	-	SINE/Alu	AluJb	14.06	1.03529	13.5807	2.42567e-05	Yes	1960	ENSG00000171357	LURAP1
chr6	21502710	21503117	MLT1I	+	LTR/ERVL-MaLR	MLT1I	0.540621	8.2769	-15.31	2.42983e-05	Yes	-90856	ENSG00000124766	SOX4
chr15	65333929	65334261	MLT1J|MLT1J-int	-	LTR/ERVL-MaLR	MLT1J-int	12.6855	0.985925	12.8666	2.43438e-05	Yes	-3448	ENSG00000186198	SLC51B
chr17	67070400	67073893	L1PA16	-	LINE/L1	L1PA16	15.2883	1.24132	12.3162	2.43438e-05	Yes	951	ENSG00000154262	ABCA6
chr9	138042435	138042916	MLT1D	-	LTR/ERVL-MaLR	MLT1D	8.11092	0.392085	20.6867	2.43557e-05	Yes	29411	ENSG00000130558	OLFM1
chr13	48615342	48615688	MLT1A0	+	LTR/ERVL-MaLR	MLT1A0	23.7762	4.3743	5.43542	2.4714e-05	Yes	0	ENSG00000136159	NUDT15
chr1	31833015	31833307	AluSp	-	SINE/Alu	AluSp	16.3095	1.24621	13.0873	2.49973e-05	Yes	0	ENSG00000121766	ZCCHC17
chr6	152811474	152816574	LTR7C|HERVH-int|HERVH-int|HERVH-int|HERVH-int	+	LTR/ERV1	HERVH-int	14.4791	0.749025	19.3306	2.50548e-05	Yes	0	ENSG00000131018	SYNE1
chr10	71265465	71265629	MER20B	-	DNA/hAT-Charlie	MER20B	3.31701	0.395936	8.37763	2.50679e-05	Yes	0	ENSG00000099282	TSPAN15
chr1	49329235	49330356	L1ME3Cz	+	LINE/L1	L1ME3Cz	6.88146	0.611412	11.255	2.51187e-05	Yes	0	ENSG00000186094	AGBL4
chr8	73858331	73858599	AluSc8	-	SINE/Alu	AluSc8	1.53019	12.9625	-8.47114	2.52499e-05	Yes	7748	ENSG00000182674	KCNB2
chr5	136091209	136092198	L1MA9	-	LINE/L1	L1MA9	7.76756	0.501342	15.4935	2.5671e-05	Yes	218790	ENSG00000152377	SPOCK1
chr7	138707008	138707297	AluJo	+	SINE/Alu	AluJo	19.9896	69.7082	-3.48722	2.5777e-05	Yes	3156	ENSG00000146858	ZC3HAV1L
chr8	59121206	59121720	MER115	-	DNA/hAT-Tip100	MER115	5.7223	26.4086	-4.61503	2.59106e-05	Yes	4369	ENSG00000169122	FAM110B
chr19	38741228	38741508	L2c	+	LINE/L2	L2c	9.06937	0.499851	18.1441	2.60815e-05	Yes	0	ENSG00000167642	SPINT2
chr11	94304452	94306839	L1PA5	-	LINE/L1	L1PA5	3.65531	0.39543	9.24389	2.66018e-05	Yes	0	ENSG00000134627	PIWIL4
chr1	40120607	40120911	AluSc	-	SINE/Alu	AluSc	3.04323	0.395459	7.69545	2.67291e-05	Yes	3883	ENSG00000116981	NT5C1A
chr19	21628945	21629830	L1PA7	-	LINE/L1	L1PA7	3.04018	24.6704	-8.11478	2.67291e-05	Yes	0	ENSG00000269237	CTD-2561J22.3
chr1	14522240	14523833	L2a	-	LINE/L2	L2a	5.69419	0.48211	11.811	2.68098e-05	Yes	370667	ENSG00000116731	PRDM2
chr20	1916953	1917200	MIR	-	SINE/MIR	MIR	10.9476	0.746309	14.669	2.68098e-05	Yes	0	ENSG00000198053	SIRPA
chrX	48438783	48439081	AluSx1	-	SINE/Alu	AluSx1	10.2847	43.1294	-4.19354	2.68098e-05	Yes	1330	ENSG00000102317	RBM3
chr3	4360936	4361343	LOR1b	-	LTR/ERV1	LOR1b	3.93498	29.4839	-7.49275	2.68678e-05	Yes	0	ENSG00000144455	SUMF1
chr19	44414686	44416540	L1ME1	+	LINE/L1	L1ME1	18.7118	64.0817	-3.42467	2.70303e-05	Yes	242	ENSG00000124459	ZNF45
chr2	231409494	231410269	L1PREC2	+	LINE/L1	L1PREC2	15.3863	1.36822	11.2455	2.71068e-05	Yes	690	ENSG00000067066	SP100
chr10	2648363	2648773	MSTB1	+	LTR/ERVL-MaLR	MSTB1	0.675091	14.6559	-21.7095	2.71172e-05	Yes	-459753	ENSG00000067057	PFKP
chrX	28996719	28997359	L2a	-	LINE/L2	L2a	5.59141	0.501859	11.1414	2.72374e-05	Yes	0	ENSG00000169306	IL1RAPL1
chr8	42981692	42984006	L1M2	-	LINE/L1	L1M2	188.903	737.536	-3.9043	2.73878e-05	Yes	3116	ENSG00000185900	POMK
chr19	17560848	17561600	L1MB5	-	LINE/L1	L1MB5	6.63357	0.581736	11.4031	2.76338e-05	Yes	0	ENSG00000269035	CTD-2521M24.10
chr17	3401382	3401507	L2d2	+	LINE/L2	L2d2	6.56226	0.393831	16.6626	2.76435e-05	Yes	0	ENSG00000141255	SPATA22
chr16	19004378	19008623	HERVH-int|HERVH-int|HERVH-int|HERVH-int|HERVH-int|LTR7B|LTR7B	-	LTR/ERV1	HERVH-int	8.78453	0.58315	15.0639	2.76937e-05	Yes	0	ENSG00000170537	TMC7
chr11	45508339	45508836	MLT2B4	-	LTR/ERVL	MLT2B4	11.5929	0.960764	12.0663	2.77019e-05	Yes	161592	ENSG00000175264	CHST1
chr4	6501870	6502174	AluSq2	-	SINE/Alu	AluSq2	6.71738	0.532356	12.6182	2.77375e-05	Yes	0	ENSG00000074211	PPP2R2C
chr8	59116860	59117660	L1PA14	-	LINE/L1	L1PA14	1.49939	13.2149	-8.81355	2.80826e-05	Yes	23	ENSG00000169122	FAM110B
chr19	39831524	39832273	L2	+	LINE/L2	L2	14.3146	1.11368	12.8534	2.8147e-05	Yes	0	ENSG00000130755	GMFG
chr11	94866560	94866799	MIR	+	SINE/MIR	MIR	21.2063	3.70915	5.71728	2.84037e-05	Yes	752	ENSG00000149218	ENDOD1
chr1	195727275	195728375	L1MC3	+	LINE/L1	L1MC3	2.55591	0.394552	6.47801	2.84572e-05	Yes	466535	ENSG00000162687	KCNT2
chr17	3392866	3393556	L1ME3G	+	LINE/L1	L1ME3G	7.14247	0.435533	16.3994	2.84572e-05	Yes	0	ENSG00000141255	SPATA22
chr19	23287124	23287908	MER61-int	+	LTR/ERV1	MER61-int	1.37173	13.4002	-9.76883	2.84572e-05	Yes	0	ENSG00000183850	ZNF730
chr6	165218359	165218763	MLT1B	-	LTR/ERVL-MaLR	MLT1B	11.6355	0.887792	13.1061	2.84572e-05	Yes	474391	ENSG00000112539	C6orf118
chr17	62760871	62761314	LTR7C	-	LTR/ERV1	LTR7C	13.2668	0.771709	17.1914	2.86036e-05	Yes	89117	ENSG00000176809	LRRC37A3
chr20	1912734	1913581	L2a	-	LINE/L2	L2a	11.6596	0.913778	12.7598	2.86418e-05	Yes	0	ENSG00000198053	SIRPA
chr10	88808673	88808983	AluSx3	+	SINE/Alu	AluSx3	10.6007	0.659055	16.0847	2.86618e-05	Yes	1261	ENSG00000148672	GLUD1
chr17	58236421	58236546	MIRb	-	SINE/MIR	MIRb	2.95659	0.395941	7.46724	2.86726e-05	Yes	0	ENSG00000167434	CA4
chr2	55757178	55757532	THE1B	+	LTR/ERVL-MaLR	THE1B	35.2065	6.69049	5.26218	2.9038e-05	Yes	0	ENSG00000163001	CCDC104
chr8	143585970	143586139	L2b	-	LINE/L2	L2b	4.20781	0.393242	10.7003	2.9117e-05	Yes	0	ENSG00000181790	BAI1
chr6	32868781	32868916	FLAM_A	+	SINE/Alu	FLAM_A	7.28964	31.4293	-4.3115	2.92102e-05	Yes	33491	ENSG00000242574	HLA-DMB
chr21	30913292	30913586	AluSc	-	SINE/Alu	AluSc	3.4889	0.395944	8.8116	2.93071e-05	Yes	0	ENSG00000156273	BACH1
chr19	614475	614654	L2a	-	LINE/L2	L2a	10.6647	0.777552	13.7157	2.93071e-05	Yes	0	ENSG00000099822	HCN2
chr1	46693597	46693902	L1MC5	-	LINE/L1	L1MC5	13.2951	0.820964	16.1945	2.94044e-05	Yes	6665	ENSG00000171357	LURAP1
chr1	25884260	25884372	MIR	-	SINE/MIR	MIR	2.1967	0.394376	5.57007	2.94202e-05	Yes	0	ENSG00000157978	LDLRAP1
chr1	145016216	145016644	MLT1H	+	LTR/ERVL-MaLR	MLT1H	71.02	16.2122	4.38065	2.94202e-05	Yes	0	ENSG00000178104	PDE4DIP
chr2	73275976	73276153	L1MC4	-	LINE/L1	L1MC4	8.62606	0.699696	12.3283	2.94296e-05	Yes	0	ENSG00000144040	SFXN5
chr19	57958001	57958803	Tigger3b	-	DNA/TcMar-Tigger	Tigger3b	6.57555	28.9561	-4.40361	2.95413e-05	Yes	0	ENSG00000268163	AC004076.9
chr19	45988100	45988403	AluSz6	-	SINE/Alu	AluSz6	5.82286	28.494	-4.89347	3.00029e-05	Yes	145	ENSG00000125744	RTN2
chr1	223377406	223377804	Arthur1	-	DNA/hAT-Tip100	Arthur1	29.4632	4.07614	7.2282	3.02983e-05	Yes	16358	ENSG00000143502	SUSD4
chr22	31366260	31366297	MIR3	-	SINE/MIR	MIR3	7.01139	29.8549	-4.25805	3.02983e-05	Yes	-1977	ENSG00000133422	MORC2
chr4	46247165	46247242	MIR	+	SINE/MIR	MIR	58.4005	11.8	4.94921	3.03851e-05	Yes	3203	ENSG00000151834	GABRA2
chr1	44991215	44992927	L2a	+	LINE/L2	L2a	5.30532	0.436522	12.1536	3.06937e-05	Yes	0	ENSG00000187147	RNF220
chr3	170389966	170396051	LTR7|HERVH-int|HERVH-int|HERVH-int|HERVH-int|LTR7	-	LTR/ERV1	HERVH-int	5.10221	0.434428	11.7446	3.07701e-05	Yes	0	ENSG00000013297	CLDN11
chr8	38398445	38399113	LTR48	-	LTR/ERV1	LTR48	3.6523	0.435959	8.37763	3.07701e-05	Yes	-12266	ENSG00000196166	C8orf86
chr9	19518394	19518713	AluSc	-	SINE/Alu	AluSc	6.37815	0.554271	11.5073	3.07701e-05	Yes	0	ENSG00000155886	SLC24A2
chr1	205482124	205482432	L3b	+	LINE/CR1	L3b	3.93588	0.394944	9.96566	3.08411e-05	Yes	0	ENSG00000117266	CDK18
chr3	58402355	58402649	AluSz	-	SINE/Alu	AluSz	14.8559	1.21557	12.2213	3.09106e-05	Yes	0	ENSG00000168297	PXK
chr19	20331250	20332477	LTR70	-	LTR/ERV1	LTR70	13.0231	58.6705	-4.50513	3.10994e-05	Yes	19952	ENSG00000256229	ZNF486
chr5	45256627	45256976	AluJr	-	SINE/Alu	AluJr	16.6935	1.18576	14.0783	3.13547e-05	Yes	2374	ENSG00000164588	HCN1
chr1	248876941	248881304	MER4-int|MER4-int|MER4-int|MER4-int|MER4-int|MER4A1	+	LTR/ERV1	MER4-int	5.52333	0.434692	12.7063	3.14093e-05	Yes	21413	ENSG00000266949	LYPD8
chr2	101631441	101632083	Tigger3	-	DNA/TcMar-Tigger	Tigger3	4.954	25.1427	-5.07524	3.14093e-05	Yes	0	ENSG00000071082	RPL31
chr20	45311786	45312415	LTR9D	+	LTR/ERV1	LTR9D	22.8733	66.9754	-2.92811	3.14093e-05	Yes	590	ENSG00000172315	TP53RK
chr2	104424586	104424992	MLT1H	-	LTR/ERVL-MaLR	MLT1H	0.536671	8.48538	-15.8111	3.18712e-05	Yes	964235	ENSG00000170417	TMEM182
chr17	58742974	58743444	MLT1F	-	LTR/ERVL-MaLR	MLT1F	24.9884	80.6167	-3.22616	3.19127e-05	Yes	1126	ENSG00000170836	PPM1D
chr8	67349864	67350495	L2b	-	LINE/L2	L2b	6.93763	0.613971	11.2996	3.19344e-05	Yes	0	ENSG00000147576	ADHFE1
chr10	134569933	134571113	Tigger3b	+	DNA/TcMar-Tigger	Tigger3b	11.0544	0.890035	12.4201	3.21611e-05	Yes	0	ENSG00000068383	INPP5A
chr10	71260177	71260603	MLT2B4	-	LTR/ERVL	MLT2B4	4.39627	0.435775	10.0884	3.2243e-05	Yes	0	ENSG00000099282	TSPAN15
chr7	130738535	130739135	L2a	+	LINE/L2	L2a	4.37931	0.435369	10.0589	3.28001e-05	Yes	-55721	ENSG00000128585	MKLN1
chr8	143737323	143738290	L1M4b	-	LINE/L1	L1M4b	2.60315	17.3894	-6.68013	3.28178e-05	Yes	-13437	ENSG00000167653	PSCA
chr1	247538843	247539439	LTR8A	+	LTR/ERV1	LTR8A	24.0019	3.15517	7.60717	3.28269e-05	Yes	-40020	ENSG00000162711	NLRP3
chr16	72487901	72490104	L1MA2	-	LINE/L1	L1MA2	8.05335	66.859	-8.30201	3.32245e-05	Yes	-277125	ENSG00000118557	PMFBP1
chr5	79775524	79776460	L1MEg	+	LINE/L1	L1MEg	98.5885	28.9193	3.40909	3.32259e-05	Yes	356	ENSG00000039319	ZFYVE16
chr21	15218743	15218911	MIRb	-	SINE/MIR	MIRb	4.62144	0.395533	11.6841	3.3241e-05	Yes	-165285	ENSG00000269011	AL050303.1
chr1	226031761	226031882	MIRb	+	SINE/MIR	MIRb	12.4321	0.57824	21.4999	3.33209e-05	Yes	0	ENSG00000143819	EPHX1
chr2	11565424	11566766	HERVH48-int|MER48	+	LTR/ERV1	HERVH48-int	8.51418	0.64255	13.2506	3.33453e-05	Yes	17736	ENSG00000169016	E2F6
chr19	46535320	46537106	MER52A	+	LTR/ERV1	MER52A	9.40465	0.65355	14.3901	3.34736e-05	Yes	5901	ENSG00000204869	IGFL4
chr5	135225581	135225873	AluJb	-	SINE/Alu	AluJb	4.60441	0.53053	8.67888	3.34736e-05	Yes	1256	ENSG00000145832	SLC25A48
chr8	4785268	4786006	L2a	+	LINE/L2	L2a	4.24321	0.434947	9.75568	3.34821e-05	Yes	0	ENSG00000183117	CSMD1
chr5	146200185	146200605	L2a	+	LINE/L2	L2a	6.68147	0.557564	11.9833	3.37114e-05	Yes	0	ENSG00000156475	PPP2R2B
chr2	127817482	127817654	MER3	-	DNA/hAT-Charlie	MER3	6.31344	0.434212	14.54	3.39796e-05	Yes	0	ENSG00000136717	BIN1
chr1	10480333	10480427	L1ME3D	+	LINE/L1	L1ME3D	50.4776	205.11	-4.06338	3.40053e-05	Yes	133	ENSG00000142657	PGD
chr20	30557748	30557842	MIR	+	SINE/MIR	MIR	1.91647	17.4737	-9.11766	3.40053e-05	Yes	0	ENSG00000260903	XKR7
chr8	27465719	27465833	MER103C	+	DNA/hAT-Charlie	MER103C	22.1297	4.11179	5.382	3.4245e-05	Yes	0	ENSG00000120885	CLU
chr8	95442870	95443129	Charlie8	+	DNA/hAT-Charlie	Charlie8	4.56779	24.5245	-5.36902	3.4245e-05	Yes	0	ENSG00000197275	RAD54B
chr11	45887432	45888136	L2c	-	LINE/L2	L2c	7.50649	0.593361	12.6508	3.43585e-05	Yes	0	ENSG00000121671	CRY2
chr1	248865741	248866133	L2	+	LINE/L2	L2	4.56712	0.435716	10.4819	3.45205e-05	Yes	-20113	ENSG00000189181	OR14I1
chr1	84545349	84545648	AluSq2	-	SINE/Alu	AluSq2	3.15284	23.8131	-7.5529	3.48413e-05	Yes	0	ENSG00000142875	PRKACB
chr4	21804797	21805507	L2d2	+	LINE/L2	L2d2	3.74826	0.394475	9.5019	3.50771e-05	Yes	0	ENSG00000185774	KCNIP4
chr7	92108507	92114588	LTR7|HERVH-int|HERVH-int|HERVH-int|LTR7	-	LTR/ERV1	HERVH-int	65.4623	6.83976	9.57084	3.51658e-05	Yes	-1208	ENSG00000242950	ERVW-1
chr7	158227561	158228781	L1MB1	+	LINE/L1	L1MB1	2.59299	18.5551	-7.15585	3.51658e-05	Yes	0	ENSG00000155093	PTPRN2
chrX	103170656	103172068	MER39B|MLT1B-int|MLT1B	-	LTR/ERV1	MLT1B-int	1.75315	15.252	-8.69979	3.5351e-05	Yes	-1412	ENSG00000158427	TMSB15B
chr14	70036656	70036823	L3	+	LINE/CR1	L3	21.3784	68.0699	-3.18405	3.5578e-05	Yes	661	ENSG00000255994	CCDC177
chr20	44039341	44039757	L2c	-	LINE/L2	L2c	7.50583	0.584411	12.8434	3.5578e-05	Yes	92	ENSG00000254806	SYS1-DBNDD2
chr3	185863523	185863843	AluSq2	+	SINE/Alu	AluSq2	6.37399	0.583216	10.9291	3.5578e-05	Yes	0	ENSG00000058866	DGKG
chr4	7958611	7959101	LTR24	-	LTR/ERV1	LTR24	22.6335	2.29223	9.87403	3.56181e-05	Yes	7939	ENSG00000163995	ABLIM2
chr7	111799499	111799741	L2d2	+	LINE/L2	L2d2	4.1608	0.481421	8.64275	3.56181e-05	Yes	0	ENSG00000128512	DOCK4
chr2	104423412	104423736	AluJr	+	SINE/Alu	AluJr	0.537798	7.56909	-14.0742	3.58534e-05	Yes	963061	ENSG00000170417	TMEM182
chr6	30459582	30459877	AluSx3	-	SINE/Alu	AluSx3	7.89585	0.64353	12.2696	3.61891e-05	Yes	0	ENSG00000204592	HLA-E
chr10	102166088	102172257	L1PA4	+	LINE/L1	L1PA4	199.598	35.0851	5.68897	3.63799e-05	Yes	41498	ENSG00000099194	SCD
chr3	185995122	185995276	MIRb	-	SINE/MIR	MIRb	10.9967	1.11693	9.84548	3.64331e-05	Yes	0	ENSG00000058866	DGKG
chr10	88807361	88807543	MER20	+	DNA/hAT-Charlie	MER20	8.71267	0.582713	14.9519	3.66352e-05	Yes	2701	ENSG00000148672	GLUD1
chr10	102147193	102148155	HERVH-int|HERVH-int|LTR7B	+	LTR/ERV1	HERVH-int	197.763	54.2423	3.64593	3.66352e-05	Yes	22603	ENSG00000099194	SCD
chr14	70034454	70034526	L2a	+	LINE/L2	L2a	4.59868	24.9288	-5.42087	3.66352e-05	Yes	2958	ENSG00000255994	CCDC177
chr3	170771792	170771999	Charlie18a	-	DNA/hAT-Charlie	Charlie18a	31.0726	2.42633	12.8064	3.66352e-05	Yes	7130	ENSG00000154310	TNIK
chr3	196708253	196708878	L1MC1	+	LINE/L1	L1MC1	37.2415	3.26145	11.4187	3.66352e-05	Yes	6615	ENSG00000163975	MFI2
chr4	611506	611920	MER70B	+	LTR/ERVL	MER70B	12.3823	0.878519	14.0946	3.66352e-05	Yes	-7454	ENSG00000133256	PDE6B
chr7	12129631	12132038	LTR18B|HERVL18-int|HERVL18-int|HERVL18-int|HERVL18-int|HERVL18-int	+	LTR/ERVL	HERVL18-int	3.14989	0.4819	6.5364	3.66352e-05	Yes	-118830	ENSG00000106460	TMEM106B
chrX	72747793	72753783	LTR7|HERVH-int|HERVH-int|HERVH-int|HERVH-int|HERVH-int|HERVH-int|LTR7	+	LTR/ERV1	HERVH-int	2.54007	0.395753	6.41832	3.66352e-05	Yes	-29254	ENSG00000204116	CHIC1
chrX	47344656	47345262	MER92B	-	LTR/ERV1	MER92B	7.79908	29.889	-3.83237	3.66551e-05	Yes	450	ENSG00000196741	CXorf24
chr7	96604090	96604452	L2b	+	LINE/L2	L2b	0.727666	13.1299	-18.0438	3.66673e-05	Yes	-30409	ENSG00000006377	DLX6
chr1	24799783	24800094	AluSp	+	SINE/Alu	AluSp	27.98	5.65077	4.95154	3.67209e-05	Yes	318	ENSG00000001461	NIPAL3
chr21	43719953	43720118	MIRb	-	SINE/MIR	MIRb	42.5834	9.257	4.60013	3.67209e-05	Yes	2600	ENSG00000160179	ABCG1
chr7	78818769	78819900	L1MC2	-	LINE/L1	L1MC2	4.55924	0.480833	9.48198	3.67209e-05	Yes	0	ENSG00000187391	MAGI2
chrX	111868554	111869076	L2	-	LINE/L2	L2	6.62865	0.482354	13.7423	3.67868e-05	Yes	4801	ENSG00000182508	LHFPL1
chr1	195717210	195717661	L1MB8	-	LINE/L1	L1MB8	4.10851	0.395909	10.3774	3.68462e-05	Yes	477249	ENSG00000162687	KCNT2
chr4	76506307	76506658	Tigger3a	+	DNA/TcMar-Tigger	Tigger3a	35.7378	7.90306	4.52202	3.68462e-05	Yes	0	ENSG00000138769	CDKL2
chr15	42699920	42700045	Charlie15a	+	DNA/hAT-Charlie	Charlie15a	9.1992	0.504726	18.2261	3.687e-05	Yes	0	ENSG00000092529	CAPN3
chr20	44670404	44671093	L2c	-	LINE/L2	L2c	6.96733	0.589437	11.8203	3.687e-05	Yes	0	ENSG00000124140	SLC12A5
chr6	73097745	73098913	L2a	-	LINE/L2	L2a	4.4791	0.532137	8.41719	3.687e-05	Yes	0	ENSG00000079841	RIMS1
chr10	71260659	71261091	L2b	-	LINE/L2	L2b	5.64179	0.481685	11.7126	3.70874e-05	Yes	0	ENSG00000099282	TSPAN15
chr11	107838021	107838183	FRAM	-	SINE/Alu	FRAM	11.6773	38.1506	-3.26706	3.70874e-05	Yes	3814	ENSG00000179331	RAB39A
chr6	46192526	46198629	L1PA5	-	LINE/L1	L1PA5	9.69705	0.758578	12.7832	3.70874e-05	Yes	0	ENSG00000172348	RCAN2
chr15	101612358	101612690	L1ME4b	+	LINE/L1	L1ME4b	10.5954	0.649862	16.304	3.72053e-05	Yes	2042	ENSG00000154237	LRRK1
chr2	233601697	233601890	MER58A	+	DNA/hAT-Charlie	MER58A	2.54062	14.5618	-5.73161	3.72053e-05	Yes	0	ENSG00000204120	GIGYF2
chr1	173764984	173765248	AluSx3	-	SINE/Alu	AluSx3	2.13924	16.8224	-7.86376	3.73398e-05	Yes	3441	ENSG00000120334	CENPL
chr2	172637792	172639429	L1ME3B	+	LINE/L1	L1ME3B	140.315	29.474	4.76063	3.7596e-05	Yes	1452	ENSG00000115840	SLC25A12
chr2	166844831	166845298	LTR33	-	LTR/ERVL	LTR33	10.5173	0.876847	11.9945	3.76164e-05	Yes	373	ENSG00000144285	SCN1A
chr10	75119213	75120271	L1MC4	+	LINE/L1	L1MC4	28.696	3.33026	8.61674	3.77712e-05	Yes	-597	ENSG00000156042	TTC18
chr11	121933809	121934014	MLT1D	+	LTR/ERVL-MaLR	MLT1D	2.4468	14.0367	-5.73677	3.77712e-05	Yes	52049	ENSG00000259571	BLID
chr4	159145599	159150393	Harlequin-int|Harlequin-int|LTR2	-	LTR/ERV1	Harlequin-int	11.3246	0.983455	11.5151	3.77712e-05	Yes	0	ENSG00000164124	TMEM144
chrX	103044886	103044993	MIR1_Amn	-	SINE/MIR	MIR1_Amn	7.71357	0.496448	15.5375	3.7904e-05	Yes	0	ENSG00000123560	PLP1
chr19	34875963	34876284	AluSq	+	SINE/Alu	AluSq	12.3355	0.789505	15.6244	3.79345e-05	Yes	0	ENSG00000105220	GPI
chr4	7959133	7959326	L2c	-	LINE/L2	L2c	14.478	1.13013	12.8109	3.80211e-05	Yes	7714	ENSG00000163995	ABLIM2
chr7	142802210	142807597	LTR7B|HERVH-int|HERVH-int|HERVH-int|HERVH-int|HERVH-int|HERVH-int|LTR7B	+	LTR/ERV1	HERVH-int	31.7293	5.44438	5.8279	3.80841e-05	Yes	-21574	ENSG00000159763	PIP
chr1	160054941	160055182	MIR	-	SINE/MIR	MIR	16.7657	1.72728	9.70641	3.87346e-05	Yes	0	ENSG00000162728	KCNJ9
chr1	78489993	78490269	AluJo	-	SINE/Alu	AluJo	32.9523	4.27693	7.70466	3.87717e-05	Yes	0	ENSG00000137960	GIPC2
chr20	52566446	52566993	L2a	+	LINE/L2	L2a	6.58876	0.615322	10.7078	3.88269e-05	Yes	0	ENSG00000064787	BCAS1
chr2	101632084	101633535	L1PA3	+	LINE/L1	L1PA3	1.46077	12.4909	-8.55089	3.88321e-05	Yes	0	ENSG00000071082	RPL31
chr3	133506933	133514414	MER51B|MER51-int|MER51-int|MER51-int	+	LTR/ERV1	MER51-int	23.752	2.6629	8.91961	3.91104e-05	Yes	0	ENSG00000144867	SRPRB
chr7	26501257	26501754	L1MB3	-	LINE/L1	L1MB3	0.860844	7.39759	-8.59341	3.91104e-05	Yes	70987	ENSG00000122548	KIAA0087
chr1	68832447	68832653	L2	+	LINE/L2	L2	2.49522	0.435864	5.72476	3.93404e-05	Yes	61853	ENSG00000116745	RPE65
chr12	52405699	52406047	MSTB2	-	LTR/ERVL-MaLR	MSTB2	10.7963	0.820226	13.1626	3.94372e-05	Yes	0	ENSG00000161835	GRASP
chr8	95860544	95861013	L1MB8	-	LINE/L1	L1MB8	9.01162	0.731361	12.3217	3.94697e-05	Yes	0	ENSG00000164941	INTS8
chr17	15628985	15630274	L1MC4	+	LINE/L1	L1MC4	0.797057	8.58373	-10.7693	3.94862e-05	Yes	0	ENSG00000187607	ZNF286A
chr8	144062067	144062471	L1MEd	-	LINE/L1	L1MEd	30.4023	4.48562	6.77774	3.95948e-05	Yes	-36929	ENSG00000160932	LY6E
chr8	42979263	42979472	AluSg4	-	SINE/Alu	AluSg4	2.50232	17.3446	-6.93143	3.98832e-05	Yes	687	ENSG00000185900	POMK
chr1	160101778	160102733	L2d2	-	LINE/L2	L2d2	22.69	2.93812	7.72261	4.01399e-05	Yes	0	ENSG00000018625	ATP1A2
chr16	75507789	75508092	AluSx	+	SINE/Alu	AluSx	16.7373	1.74935	9.56776	4.02674e-05	Yes	2858	ENSG00000183196	CHST6
chr8	107572953	107579352	L1PA7	+	LINE/L1	L1PA7	7.91422	0.556594	14.219	4.02879e-05	Yes	0	ENSG00000164830	OXR1
chr12	121625900	121626439	L2c	-	LINE/L2	L2c	12.3624	0.825127	14.9824	4.0478e-05	Yes	2025	ENSG00000089041	P2RX7
chr22	38127154	38127448	AluJb	-	SINE/Alu	AluJb	1.32257	13.3789	-10.1158	4.0478e-05	Yes	0	ENSG00000100101	NOL12
chr3	10530370	10531083	L2a	+	LINE/L2	L2a	5.49549	0.529784	10.3731	4.07623e-05	Yes	0	ENSG00000157087	ATP2B2
chr8	18750132	18750434	AluSz6	-	SINE/Alu	AluSz6	7.72442	0.719259	10.7394	4.09165e-05	Yes	0	ENSG00000156011	PSD3
chr1	161339674	161339902	L1ME4b	-	LINE/L1	L1ME4b	37.9073	6.43564	5.89022	4.10986e-05	Yes	-2011	ENSG00000188931	C1orf192
chr10	88801141	88801414	AluYk2	-	SINE/Alu	AluYk2	14.5258	1.16413	12.4779	4.11029e-05	Yes	8830	ENSG00000148672	GLUD1
chr3	121469593	121469997	L1MA4	+	LINE/L1	L1MA4	9.66574	0.796506	12.1352	4.11184e-05	Yes	-992	ENSG00000173230	GOLGB1
chr11	113818156	113818537	MLT1B	-	LTR/ERVL-MaLR	MLT1B	8.1147	0.504767	16.0761	4.12685e-05	Yes	870	ENSG00000149305	HTR3B
chrX	12748582	12749372	L1MA2	+	LINE/L1	L1MA2	32.6158	2.56387	12.7213	4.12685e-05	Yes	5941	ENSG00000169933	FRMPD4
chr1	213126892	213127097	MIR3	+	SINE/MIR	MIR3	1.33834	15.3168	-11.4446	4.15914e-05	Yes	0	ENSG00000143494	VASH2
chr12	98844370	98844513	L1MC5a	-	LINE/L1	L1MC5a	9.2759	0.682257	13.5959	4.15914e-05	Yes	34810	ENSG00000245017	RP11-181C3.1
chr14	101320490	101320662	L1ME4c	-	LINE/L1	L1ME4c	93.7549	9.11234	10.2888	4.16011e-05	Yes	-24954	ENSG00000267918	AL117190.2
chr16	16665318	16665614	AluSz	-	SINE/Alu	AluSz	1.47276	13.6993	-9.30177	4.17845e-05	Yes	177508	ENSG00000214967	NPIPA7
chr3	44535609	44535942	MLT1A	+	LTR/ERVL-MaLR	MLT1A	4.67092	22.1917	-4.75104	4.18168e-05	Yes	4521	ENSG00000178917	ZNF852
chr5	118866269	118866570	AluSq2	+	SINE/Alu	AluSq2	4.33592	0.455646	9.516	4.18827e-05	Yes	0	ENSG00000133835	HSD17B4
chr12	34180589	34181062	MLT1C2	-	LTR/ERVL-MaLR	MLT1C2	5.95457	29.7915	-5.00313	4.22386e-05	Yes	0	ENSG00000139133	ALG10
chr15	80218273	80219573	LTR12C	+	LTR/ERV1	LTR12C	27.6427	6.03814	4.57801	4.26992e-05	Yes	1080	ENSG00000259642	C15orf37
chr16	5027489	5027658	ORSL-2a	+	DNA/hAT-Tip100	ORSL-2a	6.50868	0.393227	16.552	4.32455e-05	Yes	0	ENSG00000103184	SEC14L5
chr9	108169034	108169857	L1MB5	+	LINE/L1	L1MB5	5.26251	0.533566	9.8629	4.33333e-05	Yes	0	ENSG00000070214	SLC44A1
chr20	1264987	1265916	L2a	-	LINE/L2	L2a	9.69414	0.98352	9.85658	4.33524e-05	Yes	0	ENSG00000244588	RAD21L1
chr5	149577693	149577793	MIR3	-	SINE/MIR	MIR3	3.12591	0.393096	7.95204	4.33524e-05	Yes	0	ENSG00000011083	SLC6A7
chr3	193118439	193118551	MIRc	+	SINE/MIR	MIRc	26.2724	2.4684	10.6435	4.33691e-05	Yes	1316	ENSG00000127249	ATP13A4
chr21	46982337	46983974	L1MC3	+	LINE/L1	L1MC3	11.8267	1.06224	11.1337	4.34006e-05	Yes	-18013	ENSG00000173638	SLC19A1
chr7	63841232	63842296	MER11C	+	LTR/ERVK	MER11C	42.84	9.77172	4.38408	4.35265e-05	Yes	25995	ENSG00000234444	ZNF736
chr17	65030938	65031421	MLT1D	+	LTR/ERVL-MaLR	MLT1D	8.56841	35.2127	-4.1096	4.40202e-05	Yes	1425	ENSG00000075461	CACNG4
chr5	125827082	125827203	MIRb	+	SINE/MIR	MIRb	6.32516	0.454506	13.9166	4.40751e-05	Yes	0	ENSG00000155324	GRAMD3
chr1	1882803	1883193	L1ME1	-	LINE/L1	L1ME1	7.89966	0.639951	12.3442	4.4233e-05	Yes	0	ENSG00000142609	C1orf222
chr11	107837509	107837812	AluY	+	SINE/Alu	AluY	9.89778	38.8094	-3.92102	4.42706e-05	Yes	3302	ENSG00000179331	RAB39A
chr6	26173096	26173244	ORSL	+	DNA/hAT-Tip100	ORSL	1.45361	18.0919	-12.4462	4.43986e-05	Yes	1520	ENSG00000158373	HIST1H2BD
chr6	160336336	160336426	LTR80B	-	LTR/ERVL	LTR80B	4.97807	0.481238	10.3443	4.44595e-05	Yes	7229	ENSG00000130368	MAS1
chr19	2574294	2574836	L1MB3	-	LINE/L1	L1MB3	4.22325	0.435905	9.68848	4.49809e-05	Yes	0	ENSG00000176533	GNG7
chr17	67239392	67239680	Tigger3a	-	DNA/TcMar-Tigger	Tigger3a	9.06915	0.708014	12.8093	4.50911e-05	Yes	0	ENSG00000154263	ABCA10
chr5	87722629	87722837	Charlie32a	-	DNA/hAT-Charlie	Charlie32a	0.67435	6.71627	-9.95963	4.50911e-05	Yes	-157337	ENSG00000164180	TMEM161B
chr7	4938029	4938129	Charlie9	+	DNA/hAT-Charlie	Charlie9	84.9104	10.7788	7.87756	4.52007e-05	Yes	7492	ENSG00000136297	MMD2
chr15	57195449	57196258	L1PA5	-	LINE/L1	L1PA5	5.78796	25.0463	-4.32731	4.53243e-05	Yes	0	ENSG00000137871	ZNF280D
chr5	143608487	143609113	L2a	-	LINE/L2	L2a	3.87388	0.481295	8.04887	4.54162e-05	Yes	0	ENSG00000183775	KCTD16
chr6	31732933	31733244	AluSq	+	SINE/Alu	AluSq	9.80126	0.795991	12.3133	4.54316e-05	Yes	124	ENSG00000204396	VWA7
chr1	55108686	55109141	L2b	-	LINE/L2	L2b	6.80888	0.479668	14.195	4.54347e-05	Yes	0	ENSG00000271723	MROH7-TTC4
chr11	39989019	39990370	HUERS-P2-int|LTR1C1	+	LTR/ERV1	HUERS-P2-int	2.30997	0.394596	5.85402	4.54347e-05	Yes	145384	ENSG00000148948	LRRC4C
chr19	45987350	45987661	AluJr	-	SINE/Alu	AluJr	5.76538	32.615	-5.65705	4.54347e-05	Yes	887	ENSG00000125744	RTN2
chr22	34587302	34587681	MLT1C2	+	LTR/ERVL-MaLR	MLT1C2	12.2874	0.67296	18.2587	4.54347e-05	Yes	-268474	ENSG00000133424	LARGE
chr6	26171822	26171918	MER5A	-	DNA/hAT-Charlie	MER5A	4.0176	44.9584	-11.1904	4.55012e-05	Yes	246	ENSG00000158373	HIST1H2BD
chr1	173577324	173577446	AluJr4	+	SINE/Alu	AluJr4	8.03395	29.1179	-3.62436	4.55509e-05	Yes	1255	ENSG00000183831	ANKRD45
chr2	104695577	104698150	L1MC1	-	LINE/L1	L1MC1	0.986835	15.5256	-15.7328	4.55939e-05	Yes	-773820	ENSG00000198914	POU3F3
chr5	175300871	175301224	L2b	-	LINE/L2	L2b	4.48035	0.51854	8.64031	4.55939e-05	Yes	0	ENSG00000145920	CPLX2
chr14	90741205	90741579	L1MC4	+	LINE/L1	L1MC4	5.64045	23.5514	-4.17545	4.57505e-05	Yes	1002	ENSG00000119720	NRDE2
chr2	8862986	8863164	Tigger19b	-	DNA/TcMar-Tigger	Tigger19b	35.9038	7.60353	4.72199	4.57505e-05	Yes	2245	ENSG00000134313	KIDINS220
chr11	66055952	66056099	L2c	-	LINE/L2	L2c	5.05718	35.4282	-7.00553	4.58998e-05	Yes	0	ENSG00000174851	YIF1A
chr8	42985469	42985704	L1ME2	-	LINE/L1	L1ME2	19.551	74.877	-3.82983	4.59864e-05	Yes	6893	ENSG00000185900	POMK
chr3	58402720	58402931	AluJo	-	SINE/Alu	AluJo	11.5511	0.835049	13.8328	4.61315e-05	Yes	0	ENSG00000168297	PXK
chr13	29686240	29687213	L2	-	LINE/L2	L2	3.37537	0.480516	7.02447	4.61413e-05	Yes	0	ENSG00000132938	MTUS2
chr4	185595684	185596700	Tigger2b_Pri	-	DNA/TcMar-Tigger	Tigger2b_Pri	2.83547	17.5571	-6.19196	4.63877e-05	Yes	0	ENSG00000164306	PRIMPOL
chr7	13143335	13143798	MLT1C	+	LTR/ERVL-MaLR	MLT1C	6.27379	0.393457	15.9453	4.63877e-05	Yes	412777	ENSG00000122644	ARL4A
chr16	88750903	88751197	AluSx1	-	SINE/Alu	AluSx1	42.0608	6.35891	6.61447	4.67511e-05	Yes	0	ENSG00000185669	SNAI3
chr13	100139120	100143686	MER51A|HERV4_I-int	-	LTR/ERV1	HERV4_I-int	23.459	3.44612	6.80739	4.6821e-05	Yes	-9986	ENSG00000125304	TM9SF2
chr5	146361639	146362739	L1MDa	-	LINE/L1	L1MDa	4.27384	0.393947	10.8488	4.68246e-05	Yes	0	ENSG00000156475	PPP2R2B
chr6	21983143	21983503	THE1B	-	LTR/ERVL-MaLR	THE1B	0.541148	4.63099	-8.55771	4.68246e-05	Yes	303978	ENSG00000172179	PRL
chr19	21373976	21374269	AluSg	+	SINE/Alu	AluSg	2.21566	15.506	-6.99836	4.68637e-05	Yes	943	ENSG00000196705	ZNF431
chr17	61779101	61779357	AluSg	+	SINE/Alu	AluSg	31.3168	98.2898	-3.13856	4.69586e-05	Yes	-570	ENSG00000136490	LIMD2
chr10	78973366	78975006	L2	+	LINE/L2	L2	6.74354	0.620103	10.8749	4.69703e-05	Yes	0	ENSG00000156113	KCNMA1
chr19	9852502	9857939	LTR7B|HERVH-int	+	LTR/ERV1	HERVH-int	42.27	3.00298	14.076	4.73639e-05	Yes	4731	ENSG00000196605	ZNF846
chr19	34879101	34879394	AluSz	+	SINE/Alu	AluSz	13.5564	0.91322	14.8447	4.73639e-05	Yes	0	ENSG00000105220	GPI
chr3	126178969	126179246	Charlie17	-	DNA/hAT-Charlie	Charlie17	25.9391	79.8529	-3.07848	4.73639e-05	Yes	0	ENSG00000070476	ZXDC
chr9	79230460	79230633	MIRb	+	SINE/MIR	MIRb	5.65985	0.503224	11.2472	4.73752e-05	Yes	0	ENSG00000106772	PRUNE2
chr17	13936583	13937106	MLT1L	-	LTR/ERVL-MaLR	MLT1L	6.87802	44.35	-6.44807	4.76662e-05	Yes	-35708	ENSG00000006695	COX10
chr4	39455325	39455429	L2a	-	LINE/L2	L2a	8.76144	43.8031	-4.99953	4.78403e-05	Yes	316	ENSG00000163682	RPL9
chr1	173766091	173766383	AluJb	+	SINE/Alu	AluJb	1.38681	12.6599	-9.12881	4.79595e-05	Yes	2306	ENSG00000120334	CENPL
chr16	83777526	83777747	MIRb	+	SINE/MIR	MIRb	3.18116	0.395673	8.03988	4.82729e-05	Yes	0	ENSG00000140945	CDH13
chr2	6128707	6129162	MLT2B1	-	LTR/ERVL	MLT2B1	6.77707	31.214	-4.60583	4.82729e-05	Yes	14334	ENSG00000272268	DKFZP761K2322
chr16	30083219	30083515	AluSg	+	SINE/Alu	AluSg	33.8906	7.01783	4.82922	4.88137e-05	Yes	1442	ENSG00000149925	ALDOA
chr17	79357086	79357219	MIRb	+	SINE/MIR	MIRb	19.7495	1.62908	12.1231	4.88137e-05	Yes	-12057	ENSG00000263053	RP11-1055B8.6
chr2	218707829	218709187	L2c	+	LINE/L2	L2c	9.65765	0.725906	13.3043	4.89482e-05	Yes	0	ENSG00000079308	TNS1
chr10	83830884	83831644	L2a	-	LINE/L2	L2a	6.94757	0.551582	12.5957	4.90028e-05	Yes	0	ENSG00000185737	NRG3
chr3	130588303	130590115	Tigger1	+	DNA/TcMar-Tigger	Tigger1	2.6416	0.395889	6.67258	4.909e-05	Yes	0	ENSG00000017260	ATP2C1
chr10	105940563	105941776	L2a	+	LINE/L2	L2a	4.09775	0.533801	7.67655	4.93378e-05	Yes	0	ENSG00000197748	WDR96
chr1	77360498	77366072	LTR7|HERVH-int|HERVH-int|HERVH-int|HERVH-int|HERVH-int|HERVH-int|LTR7	-	LTR/ERV1	HERVH-int	43.4294	4.79775	9.05202	4.9778e-05	Yes	0	ENSG00000117069	ST6GALNAC5
chr1	210338957	210339148	L2c	+	LINE/L2	L2c	2.0064	16.4693	-8.20838	4.9778e-05	Yes	1322	ENSG00000143469	SYT14
chr1	233761332	233762154	L2a	-	LINE/L2	L2a	3.35627	0.395359	8.48917	5.00522e-05	Yes	0	ENSG00000135750	KCNK1
chr19	8276820	8276964	L2b	-	LINE/L2	L2b	5.53445	0.518448	10.675	5.00522e-05	Yes	0	ENSG00000090661	CERS4
chr3	39563800	39563932	L2a	+	LINE/L2	L2a	8.57482	0.468624	18.2979	5.00522e-05	Yes	0	ENSG00000168314	MOBP
chr9	115135481	115138532	MLT2A1|HERVL-int|MLT2A1|MLT2A1	-	LTR/ERVL	HERVL-int	57.019	145.455	-2.55099	5.00522e-05	Yes	-3686	ENSG00000119471	HSDL2
chr5	128371028	128372447	L1PA7	+	LINE/L1	L1PA7	15.0359	1.21913	12.3333	5.03567e-05	Yes	1694	ENSG00000113396	SLC27A6
chr21	16895878	16896567	LTR1A2|LTR1A2	+	LTR/ERV1	LTR1A2	10.2783	0.586682	17.5194	5.06729e-05	Yes	-205778	ENSG00000155313	USP25
chrX	71371719	71371803	OldhAT1	-	DNA/hAT-Ac	OldhAT1	27.564	4.91689	5.60598	5.06729e-05	Yes	8296	ENSG00000204131	NHSL2
chr13	100598692	100599838	L2	+	LINE/L2	L2	2.10364	0.395906	5.31348	5.06981e-05	Yes	15381	ENSG00000139800	ZIC5
chr15	85650340	85650855	L2c	-	LINE/L2	L2c	7.06807	0.593878	11.9015	5.06981e-05	Yes	0	ENSG00000073417	PDE8A
chr14	92963150	92963444	AluSx	-	SINE/Alu	AluSx	12.5331	1.07823	11.6238	5.11131e-05	Yes	555	ENSG00000140090	SLC24A4
chr2	10181744	10182263	L2a	-	LINE/L2	L2a	3.45187	24.1789	-7.00459	5.11412e-05	Yes	-714	ENSG00000172059	KLF11
chr17	26929281	26929524	AluJo	-	SINE/Alu	AluJo	23.5074	2.19864	10.6918	5.13304e-05	Yes	0	ENSG00000258472	RP11-192H23.4
chr15	89160816	89161461	MER92B	+	LTR/ERV1	MER92B	14.7111	1.14253	12.8758	5.15189e-05	Yes	-3067	ENSG00000181026	AEN
chr12	128243817	128244231	L1MC5a	+	LINE/L1	L1MC5a	3.67658	0.435393	8.44427	5.16081e-05	Yes	-507718	ENSG00000181234	TMEM132C
chr14	29262863	29263172	AluJr	+	SINE/Alu	AluJr	12.325	75.7386	-6.14513	5.17522e-05	Yes	0	ENSG00000186960	C14orf23
chr6	158092863	158093345	L1MB3	-	LINE/L1	L1MB3	5.41706	0.521735	10.3828	5.20523e-05	Yes	0	ENSG00000175048	ZDHHC14
chrX	70388299	70388601	AluSx1	+	SINE/Alu	AluSx1	15.2355	1.69816	8.97178	5.20962e-05	Yes	0	ENSG00000196338	NLGN3
chr9	113633900	113634213	MER58B	-	DNA/hAT-Charlie	MER58B	16.7967	1.03809	16.1805	5.21716e-05	Yes	1331	ENSG00000198121	LPAR1
chr19	9649795	9650018	AluSz6	-	SINE/Alu	AluSz6	32.6381	5.6145	5.81319	5.21748e-05	Yes	-493	ENSG00000130818	ZNF426
chr7	4933321	4933766	MER41B	-	LTR/ERV1	MER41B	5.88671	0.571774	10.2955	5.21748e-05	Yes	-9972	ENSG00000157927	RADIL
chr4	66461300	66461589	AluY	-	SINE/Alu	AluY	5.79229	35.6487	-6.15451	5.23784e-05	Yes	0	ENSG00000145242	EPHA5
chr1	25891832	25891941	L3	-	LINE/CR1	L3	5.42619	0.481168	11.2771	5.26443e-05	Yes	0	ENSG00000157978	LDLRAP1
chr11	74971599	74971692	MIRc	-	SINE/MIR	MIRc	445.746	151.53	2.94164	5.26443e-05	Yes	3535	ENSG00000137486	ARRB1
chr16	88741928	88742222	AluSz6	-	SINE/Alu	AluSz6	25.2172	5.02178	5.02157	5.2958e-05	Yes	1869	ENSG00000185669	SNAI3
chr1	211127242	211133387	L1PA6	-	LINE/L1	L1PA6	2.83574	0.43577	6.50742	5.35032e-05	Yes	0	ENSG00000143473	KCNH1
chr16	24874904	24876599	L1M4	+	LINE/L1	L1M4	4.10612	0.395478	10.3827	5.38403e-05	Yes	0	ENSG00000158865	SLC5A11
chr17	61793967	61794193	MER103C	-	DNA/hAT-Charlie	MER103C	8.79835	36.8476	-4.18801	5.41185e-05	Yes	0	ENSG00000266173	STRADA
chr20	1785858	1786391	MER115	+	DNA/hAT-Tip100	MER115	38.4403	9.27161	4.14602	5.42532e-05	Yes	-88764	ENSG00000198053	SIRPA
chr19	44699951	44701089	ERVL-E-int|MLT2F	+	LTR/ERVL	ERVL-E-int	16.7634	71.3548	-4.25658	5.42815e-05	Yes	-10612	ENSG00000131115	ZNF227
chr20	8805726	8806816	L2b	-	LINE/L2	L2b	4.64325	0.520062	8.92827	5.42815e-05	Yes	0	ENSG00000182621	PLCB1
chr15	90177550	90183532	L1PA3	+	LINE/L1	L1PA3	0.929576	10.222	-10.9964	5.44381e-05	Yes	0	ENSG00000166813	KIF7
chr6	97069432	97069954	L2a	+	LINE/L2	L2a	3.4267	0.435974	7.85988	5.44381e-05	Yes	4921	ENSG00000112214	FHL5
chrX	111867499	111867667	L2	-	LINE/L2	L2	6.84568	0.601772	11.3759	5.44381e-05	Yes	6210	ENSG00000182508	LHFPL1
chr1	173765741	173766050	AluJb	+	SINE/Alu	AluJb	2.83444	19.1275	-6.74823	5.44416e-05	Yes	2639	ENSG00000120334	CENPL
chr19	50992446	50992595	AluJb	+	SINE/Alu	AluJb	14.7052	1.01359	14.5081	5.44616e-05	Yes	5839	ENSG00000161671	EMC10
chr8	91691710	91693963	MER51B|MER51-int	+	LTR/ERV1	MER51-int	19.7216	1.57744	12.5023	5.45115e-05	Yes	0	ENSG00000180694	TMEM64
chrX	119565835	119566291	L2c	-	LINE/L2	L2c	25.3854	2.84201	8.9322	5.45183e-05	Yes	0	ENSG00000005893	LAMP2
chr14	23362536	23362873	L2d	-	LINE/L2	L2d	37.1218	9.40207	3.94825	5.46517e-05	Yes	5642	ENSG00000139890	REM2
chr19	53016275	53016573	AluSp	-	SINE/Alu	AluSp	6.12267	26.3915	-4.31046	5.47277e-05	Yes	869	ENSG00000258405	ZNF578
chr1	173766384	173767032	L1MC5a	-	LINE/L1	L1MC5a	3.79185	29.3256	-7.73384	5.47986e-05	Yes	1657	ENSG00000120334	CENPL
chr15	57196244	57197878	L1PA5	+	LINE/L1	L1PA5	7.23859	29.2571	-4.04182	5.48576e-05	Yes	0	ENSG00000137871	ZNF280D
chr6	28393383	28394539	Tigger1	-	DNA/TcMar-Tigger	Tigger1	22.0878	109.999	-4.98009	5.48576e-05	Yes	5169	ENSG00000187987	ZSCAN23
chrX	28993704	28994948	L2a	-	LINE/L2	L2a	9.09358	0.689269	13.1931	5.50849e-05	Yes	0	ENSG00000169306	IL1RAPL1
chr3	101314602	101314926	AluJb	-	SINE/Alu	AluJb	20.4938	3.21454	6.37535	5.51534e-05	Yes	1322	ENSG00000081154	PCNP
chr13	78344028	78344523	MLT1F2	-	LTR/ERVL-MaLR	MLT1F2	6.58238	28.9657	-4.40049	5.52999e-05	Yes	5652	ENSG00000139737	SLAIN1
chr2	181938811	181938887	LTR89	+	LTR/ERVL?	LTR89	1.97652	13.5579	-6.85948	5.56573e-05	Yes	0	ENSG00000170035	UBE2E3
chr5	87724414	87724624	MIR	+	SINE/MIR	MIR	0.705143	6.9343	-9.83389	5.62554e-05	Yes	-159122	ENSG00000164180	TMEM161B
chr1	52904460	52904763	AluSx	+	SINE/Alu	AluSx	5.21281	22.9774	-4.40787	5.62887e-05	Yes	0	ENSG00000134744	ZCCHC11
chr10	15117691	15118001	AluSx	+	SINE/Alu	AluSx	219.077	62.053	3.53049	5.62887e-05	Yes	1522	ENSG00000176244	ACBD7
chr16	75509173	75509327	MLT1H	-	LTR/ERVL-MaLR	MLT1H	18.7886	2.10575	8.92254	5.62887e-05	Yes	1623	ENSG00000183196	CHST6
chr1	169894962	169895022	AmnSINE1	+	SINE/5S-Deu-L2	AmnSINE1	20.6629	3.53288	5.84875	5.63047e-05	Yes	0	ENSG00000075945	KIFAP3
chr19	9757446	9757753	AluSq2	-	SINE/Alu	AluSq2	5.39214	20.9751	-3.88994	5.64393e-05	Yes	875	ENSG00000267106	C19orf82
chr16	24872523	24872829	AluJo	+	SINE/Alu	AluJo	3.95853	0.395929	9.99808	5.65107e-05	Yes	0	ENSG00000158865	SLC5A11
chr7	4937366	4937668	AluSx1	-	SINE/Alu	AluSx1	68.8768	10.1222	6.80456	5.66901e-05	Yes	7953	ENSG00000136297	MMD2
chr6	80230875	80232408	L1MC5	+	LINE/L1	L1MC5	14.3435	1.16409	12.3217	5.67828e-05	Yes	0	ENSG00000135338	LCA5
chr6	6345171	6345465	L1ME3G	-	LINE/L1	L1ME3G	5.87967	0.39396	14.9245	5.68397e-05	Yes	-23926	ENSG00000124491	F13A1
chr19	12971248	12971560	AluSx	-	SINE/Alu	AluSx	2.26682	15.3835	-6.78639	5.68782e-05	Yes	0	ENSG00000095066	HOOK2
chr12	108647769	108647921	L2a	-	LINE/L2	L2a	5.02103	0.617762	8.12778	5.70979e-05	Yes	3456	ENSG00000075035	WSCD2
chr3	40560255	40560742	L1ME1	-	LINE/L1	L1ME1	3.96893	24.1202	-6.07725	5.70979e-05	Yes	29	ENSG00000177842	ZNF620
chr4	77840098	77840867	Tigger1	-	DNA/TcMar-Tigger	Tigger1	3.4018	0.436074	7.80097	5.71211e-05	Yes	-21097	ENSG00000186212	SOWAHB
chr1	24117186	24117250	MIR3	+	SINE/MIR	MIR3	5.5271	0.50027	11.0482	5.76479e-05	Yes	-211	ENSG00000011009	LYPLA2
chr19	13323647	13324452	L2a	+	LINE/L2	L2a	13.5988	0.957993	14.1951	5.77566e-05	Yes	0	ENSG00000141837	CACNA1A
chr10	134495094	134495646	L1MB3	+	LINE/L1	L1MB3	11.7604	0.824392	14.2656	5.79745e-05	Yes	0	ENSG00000068383	INPP5A
chr7	135360671	135360960	AluSz6	-	SINE/Alu	AluSz6	36.718	112.091	-3.05274	5.79989e-05	Yes	0	ENSG00000243317	C7orf73
chr12	52406447	52406650	MIRc	-	SINE/MIR	MIRc	5.79676	0.553298	10.4767	5.83321e-05	Yes	0	ENSG00000161835	GRASP
chr10	91091935	91092098	LTR24B	-	LTR/ERV1	LTR24B	24.6863	2.23995	11.0209	5.83343e-05	Yes	0	ENSG00000107798	LIPA
chr19	53017028	53017297	AluSx	+	SINE/Alu	AluSx	3.907	27.8396	-7.12556	5.83921e-05	Yes	1622	ENSG00000258405	ZNF578
chr4	156895079	156895797	MER77B	+	LTR/ERVL	MER77B	8.5334	0.658884	12.9513	5.85026e-05	Yes	-20011	ENSG00000256043	CTSO
chr16	72478173	72479042	L1MA10	-	LINE/L1	L1MA10	1.09788	14.3932	-13.11	5.86308e-05	Yes	-267397	ENSG00000118557	PMFBP1
chr12	108651485	108651704	MER20	+	DNA/hAT-Charlie	MER20	7.4851	0.655987	11.4104	5.8863e-05	Yes	7172	ENSG00000075035	WSCD2
chr19	1533130	1533389	AluSp	-	SINE/Alu	AluSp	3.21591	0.437051	7.3582	5.8863e-05	Yes	0	ENSG00000185988	PLK5
chr2	73284274	73284566	AluJr	-	SINE/Alu	AluJr	4.13816	0.434988	9.51329	5.8863e-05	Yes	0	ENSG00000144040	SFXN5
chr2	200653088	200654784	L1ME3G	+	LINE/L1	L1ME3G	9.60203	0.671618	14.2969	5.8863e-05	Yes	0	ENSG00000226124	FTCDNL1
chr1	44974942	44975277	AluY	+	SINE/Alu	AluY	3.50035	0.395336	8.8541	5.90573e-05	Yes	0	ENSG00000187147	RNF220
chr14	94737285	94740124	L1MC1	+	LINE/L1	L1MC1	6.9211	0.588731	11.756	5.90626e-05	Yes	0	ENSG00000119698	PPP4R4
chr2	48830585	48830990	MSTB	-	LTR/ERVL-MaLR	MSTB	3.29871	17.4513	-5.29033	5.98503e-05	Yes	0	ENSG00000068781	STON1-GTF2A1L
chr20	1916556	1916737	MIRb	+	SINE/MIR	MIRb	7.16828	0.505636	14.1768	5.98503e-05	Yes	0	ENSG00000198053	SIRPA
chr6	6344770	6344906	MamGypsy2-I	+	LTR/Gypsy	MamGypsy2-I	3.43888	0.394745	8.71165	6.00649e-05	Yes	-23525	ENSG00000124491	F13A1
chr2	207415877	207416063	MER63A	-	DNA/hAT-Blackjack	MER63A	8.54823	0.690884	12.3729	6.00965e-05	Yes	0	ENSG00000114948	ADAM23
chr14	57764577	57764885	MamRTE1	-	LINE/RTE-BovB	MamRTE1	55.3472	16.1768	3.4214	6.05207e-05	Yes	7781	ENSG00000053770	AP5M1
chr4	66461619	66461755	MIR	-	SINE/MIR	MIR	4.81394	32.8112	-6.81588	6.07863e-05	Yes	0	ENSG00000145242	EPHA5
chr4	158307810	158310628	L1MEc	-	LINE/L1	L1MEc	8.73204	0.678922	12.8616	6.1715e-05	Yes	20584	ENSG00000120251	GRIA2
chr5	74322433	74322614	MIRc	-	SINE/MIR	MIRc	8.1125	0.746743	10.8638	6.18137e-05	Yes	676	ENSG00000176928	GCNT4
chr1	40143797	40144101	AluSc	-	SINE/Alu	AluSc	31.558	5.08503	6.20606	6.20995e-05	Yes	220	ENSG00000116983	HPCAL4
chr1	45861267	45861443	FRAM	-	SINE/Alu	FRAM	2.89905	0.395918	7.32235	6.20995e-05	Yes	0	ENSG00000070759	TESK2
chr1	233811203	233811577	MER57E1	-	LTR/ERV1	MER57E1	11.9449	1.10593	10.8008	6.20995e-05	Yes	2946	ENSG00000135750	KCNK1
chr12	1666502	1666886	MLT1A1|MLT1A1-int	-	LTR/ERVL-MaLR	MLT1A1-int	31.194	5.97738	5.21866	6.20995e-05	Yes	0	ENSG00000111186	WNT5B
chr15	51644903	51645629	LTR8	+	LTR/ERV1	LTR8	4.84317	0.395142	12.2568	6.20995e-05	Yes	0	ENSG00000186417	GLDN
chr13	67553440	67554208	L2a	+	LINE/L2	L2a	10.4269	0.818677	12.7363	6.24515e-05	Yes	0	ENSG00000184226	PCDH9
chr19	20725040	20725337	AluSp	-	SINE/Alu	AluSp	5.10551	21.5705	-4.22495	6.25605e-05	Yes	0	ENSG00000237440	ZNF737
chr1	108740417	108740865	MSTB2	+	LTR/ERVL-MaLR	MSTB2	5.20298	27.7569	-5.33482	6.28158e-05	Yes	0	ENSG00000085491	SLC25A24
chr8	42994201	42994763	MER61-int|MER61A	+	LTR/ERV1	MER61-int	46.3673	9.99808	4.63762	6.28158e-05	Yes	-794	ENSG00000165102	HGSNAT
chr10	119248970	119249171	MIR	+	SINE/MIR	MIR	36.9078	7.53689	4.89696	6.29362e-05	Yes	-52785	ENSG00000170370	EMX2
chr4	40164334	40164557	MLT2B3	-	LTR/ERVL	MLT2B3	2.32359	14.5508	-6.2622	6.34276e-05	Yes	4463	ENSG00000078177	N4BP2
chr17	42984804	42984969	MIRb	+	SINE/MIR	MIRb	14.2119	0.95728	14.8461	6.34602e-05	Yes	0	ENSG00000131095	GFAP
chr11	66065337	66065629	AluSx1	+	SINE/Alu	AluSx1	18.2647	3.1508	5.79684	6.38977e-05	Yes	1203	ENSG00000179292	TMEM151A
chr1	155104229	155104708	L2b	-	LINE/L2	L2b	10.07	0.731231	13.7714	6.44209e-05	Yes	0	ENSG00000169242	EFNA1
chr16	72569074	72569284	AluJb	-	SINE/Alu	AluJb	1.30983	11.1893	-8.54257	6.44209e-05	Yes	247501	ENSG00000140836	ZFHX3
chr2	201292848	201293902	L2c	+	LINE/L2	L2c	4.91562	0.557819	8.81221	6.44209e-05	Yes	0	ENSG00000196141	SPATS2L
chr5	88771141	88771428	MLT1J	+	LTR/ERVL-MaLR	MLT1J	20.5707	3.54542	5.80203	6.44209e-05	Yes	-571220	ENSG00000081189	MEF2C
chr1	32139520	32139935	L3	+	LINE/CR1	L3	15.6367	0.670092	23.3352	6.45031e-05	Yes	0	ENSG00000084636	COL16A1
chr1	229399669	229399986	L2a	-	LINE/L2	L2a	32.2471	7.0771	4.55654	6.4572e-05	Yes	-6837	ENSG00000168118	RAB4A
chr13	33089305	33089580	AluJr4	+	SINE/Alu	AluJr4	5.90119	29.9537	-5.07587	6.46356e-05	Yes	0	ENSG00000244754	N4BP2L2
chr19	9676064	9676345	AluSq2	+	SINE/Alu	AluSq2	2.05213	22.7603	-11.091	6.52032e-05	Yes	0	ENSG00000197961	ZNF121
chr4	159173715	159173989	AluSz	+	SINE/Alu	AluSz	4.69863	0.395059	11.8935	6.52032e-05	Yes	0	ENSG00000164124	TMEM144
chr1	226723301	226727660	LTR66|HERVL66-int	-	LTR/ERVL	HERVL66-int	4.2006	0.45581	9.21569	6.53332e-05	Yes	-8842	ENSG00000203685	C1orf95
chr15	77359148	77359540	MSTC	-	LTR/ERVL-MaLR	MSTC	1.02314	10.0593	-9.8318	6.53332e-05	Yes	0	ENSG00000140391	TSPAN3
chr3	4359811	4360291	L1MC3	+	LINE/L1	L1MC3	3.27513	28.2278	-8.61882	6.53332e-05	Yes	0	ENSG00000144455	SUMF1
chr11	118539648	118540722	L1MA3	+	LINE/L1	L1MA3	8.36276	0.54158	15.4414	6.55913e-05	Yes	0	ENSG00000118094	TREH
chr3	4361344	4362040	L1MC3	+	LINE/L1	L1MC3	14.4414	58.5367	-4.05341	6.5773e-05	Yes	0	ENSG00000144455	SUMF1
chr3	152406045	152411911	L1PB1	+	LINE/L1	L1PB1	9.83193	0.556418	17.67	6.5773e-05	Yes	-140826	ENSG00000169860	P2RY1
chr12	117476340	117476638	AluJo	+	SINE/Alu	AluJo	7.15442	0.677412	10.5614	6.58084e-05	Yes	91	ENSG00000088992	TESC
chr3	101562299	101563829	Charlie1	-	DNA/hAT-Charlie	Charlie1	59.1792	10.9812	5.38913	6.58825e-05	Yes	0	ENSG00000144802	NFKBIZ
chr7	130735230	130735659	L2a	+	LINE/L2	L2a	4.27076	0.435198	9.81337	6.58889e-05	Yes	-59197	ENSG00000128585	MKLN1
chr12	62801979	62802102	Zaphod3	-	DNA/hAT-Tip100	Zaphod3	1.56753	11.4135	-7.28117	6.59122e-05	Yes	0	ENSG00000135655	USP15
chr16	76590984	76591768	Charlie1a	-	DNA/hAT-Charlie	Charlie1a	37.9882	4.60909	8.24203	6.6021e-05	Yes	0	ENSG00000152910	CNTNAP4
chr1	247199102	247199333	Tigger4a	-	DNA/TcMar-Tigger	Tigger4a	3.60626	23.0393	-6.38869	6.6053e-05	Yes	0	ENSG00000135747	ZNF670
chr1	213127244	213127554	AluJb	-	SINE/Alu	AluJb	1.52669	12.2954	-8.05362	6.63793e-05	Yes	0	ENSG00000143494	VASH2
chr19	58808317	58808624	AluSz6	+	SINE/Alu	AluSz6	6.26757	32.8734	-5.24499	6.72123e-05	Yes	0	ENSG00000267216	AC010642.1
chr9	33582566	33584807	MSTA-int|MSTA|MSTA|MSTA-int|MSTA	+	LTR/ERVL-MaLR	MSTA-int	7.08149	0.650271	10.8901	6.73954e-05	Yes	9560	ENSG00000230453	ANKRD18B
chr7	139309069	139309922	L2c	+	LINE/L2	L2c	8.55463	0.744581	11.4892	6.74891e-05	Yes	0	ENSG00000064393	HIPK2
chr4	96176430	96177810	L2	+	LINE/L2	L2	4.4236	0.434046	10.1915	6.75294e-05	Yes	0	ENSG00000182168	UNC5C
chr19	46539464	46540475	MER52C	+	LTR/ERV1	MER52C	9.14587	0.790838	11.5648	6.75761e-05	Yes	2532	ENSG00000204869	IGFL4
chr8	119535750	119537786	L2a	+	LINE/L2	L2a	5.33876	0.586123	9.10859	6.78441e-05	Yes	0	ENSG00000177570	SAMD12
chr3	44533659	44534235	MER70-int	-	LTR/ERVL	MER70-int	16.9354	59.9037	-3.53718	6.79762e-05	Yes	6228	ENSG00000178917	ZNF852
chr22	25849273	25849558	AluJb	-	SINE/Alu	AluJb	24.8836	5.33557	4.66372	6.80628e-05	Yes	-47930	ENSG00000100068	LRP5L
chr15	77361059	77361371	L1PA13	-	LINE/L1	L1PA13	2.01158	13.8676	-6.89388	6.82018e-05	Yes	0	ENSG00000140391	TSPAN3
chr15	50644533	50644832	AluSq2	-	SINE/Alu	AluSq2	7.01606	35.8146	-5.10466	6.84421e-05	Yes	0	ENSG00000104064	GABPB1
chr5	175489194	175489516	AluYm1	+	SINE/Alu	AluYm1	6.34727	0.604363	10.5024	6.85935e-05	Yes	0	ENSG00000182230	FAM153B
chr11	66066553	66067118	MLT1G3	-	LTR/ERVL-MaLR	MLT1G3	14.9843	1.44859	10.3441	6.9006e-05	Yes	2419	ENSG00000179292	TMEM151A
chr5	132557223	132557377	MIR3	-	SINE/MIR	MIR3	1.6706	0.394409	4.23571	6.91376e-05	Yes	0	ENSG00000053108	FSTL4
chr7	31739201	31741622	Tigger1	+	DNA/TcMar-Tigger	Tigger1	0.536484	7.70827	-14.3681	6.93122e-05	Yes	0	ENSG00000106341	PPP1R17
chr18	22084056	22084359	AluY	-	SINE/Alu	AluY	2.66745	0.39536	6.7469	6.94105e-05	Yes	24136	ENSG00000134489	HRH4
chr15	85662438	85662712	AluSg	+	SINE/Alu	AluSg	10.2208	0.711534	14.3644	6.96042e-05	Yes	0	ENSG00000073417	PDE8A
chr1	155201407	155201593	MIR3	+	SINE/MIR	MIR3	47.4989	13.0205	3.64802	6.99263e-05	Yes	2651	ENSG00000177628	GBA
chr17	42991825	42991959	MIR	-	SINE/MIR	MIR	8.55114	0.557711	15.3326	6.99465e-05	Yes	0	ENSG00000131095	GFAP
chr21	45830940	45832524	L1MB7	-	LINE/L1	L1MB7	4.08872	0.483771	8.45177	7.05508e-05	Yes	0	ENSG00000142185	TRPM2
chr1	247540027	247540816	MER21C	+	LTR/ERVL	MER21C	26.1768	4.12346	6.34827	7.06581e-05	Yes	-38643	ENSG00000162711	NLRP3
chr8	11873076	11873518	L2c	-	LINE/L2	L2c	6.97181	0.530743	13.136	7.08324e-05	Yes	-34	ENSG00000255098	RP11-481A20.11
chr13	67751373	67751973	L2a	+	LINE/L2	L2a	6.63442	0.641568	10.341	7.08444e-05	Yes	0	ENSG00000184226	PCDH9
chr6	166301085	166301769	L2a	+	LINE/L2	L2a	2.88065	0.395859	7.27697	7.12566e-05	Yes	0	ENSG00000112541	PDE10A
chr13	93521167	93521342	MIRb	-	SINE/MIR	MIRb	17.559	1.85601	9.46057	7.1395e-05	Yes	1678	ENSG00000179399	GPC5
chrX	111866338	111867009	L1ME3Cz	-	LINE/L1	L1ME3Cz	11.7317	0.592071	19.8148	7.1547e-05	Yes	6868	ENSG00000182508	LHFPL1
chr4	21939182	21939387	L2c	+	LINE/L2	L2c	4.16894	0.502926	8.28936	7.16097e-05	Yes	0	ENSG00000185774	KCNIP4
chr1	162418037	162420506	L1PA4	+	LINE/L1	L1PA4	4.06666	0.483163	8.41676	7.1841e-05	Yes	-36110	ENSG00000198574	SH2D1B
chr8	42984001	42984253	L1M3	-	LINE/L1	L1M3	10.6666	42.6005	-3.99383	7.20243e-05	Yes	5425	ENSG00000185900	POMK
chr1	108738339	108738639	AluSz6	+	SINE/Alu	AluSz6	6.32407	31.1123	-4.91968	7.25138e-05	Yes	0	ENSG00000085491	SLC25A24
chr3	48333676	48333858	L1MC4	-	LINE/L1	L1MC4	5.31975	27.8121	-5.22808	7.3082e-05	Yes	0	ENSG00000164048	ZNF589
chr9	19590229	19590945	L2b	+	LINE/L2	L2b	3.59689	0.434634	8.27569	7.3082e-05	Yes	0	ENSG00000155886	SLC24A2
chr5	177490452	177490946	L1ME3E	+	LINE/L1	L1ME3E	6.31257	0.479193	13.1733	7.3151e-05	Yes	7893	ENSG00000204677	FAM153C
chr5	36864521	36865803	L1MB8	-	LINE/L1	L1MB8	8.18574	37.1031	-4.53264	7.34406e-05	Yes	-11059	ENSG00000164190	NIPBL
chr15	40352188	40352639	LTR16E2	+	LTR/ERVL	LTR16E2	15.9281	1.67602	9.50353	7.3641e-05	Yes	-20800	ENSG00000140319	SRP14
chr17	53034095	53034514	LTR72	-	LTR/ERV1	LTR72	96.1031	29.9185	3.21216	7.38559e-05	Yes	0	ENSG00000141198	TOM1L1
chr15	83802977	83803274	AluSx1	-	SINE/Alu	AluSx1	42.0291	135.491	-3.22375	7.47778e-05	Yes	0	ENSG00000136404	TM6SF1
chr7	152539652	152540590	L1ME1	-	LINE/L1	L1ME1	8.12375	41.1621	-5.06688	7.47778e-05	Yes	0	ENSG00000133627	ACTR3B
chr8	86398127	86402150	L1PB1	-	LINE/L1	L1PB1	6.76367	0.683601	9.89418	7.47778e-05	Yes	4406	ENSG00000104267	CA2
chr19	58036941	58037457	LTR6A	+	LTR/ERV1	LTR6A	34.1003	3.71187	9.18682	7.483e-05	Yes	-1237	ENSG00000121406	ZNF549
chr15	65335197	65335558	MLT1K	+	LTR/ERVL-MaLR	MLT1K	12.1831	1.21626	10.0168	7.48886e-05	Yes	-2151	ENSG00000186198	SLC51B
chr20	30557434	30557533	MIRc	+	SINE/MIR	MIRc	1.69946	14.0836	-8.2871	7.49821e-05	Yes	0	ENSG00000260903	XKR7
chr7	96600359	96600483	L2d2	-	LINE/L2	L2d2	1.10747	23.3304	-21.0664	7.49822e-05	Yes	-34378	ENSG00000006377	DLX6
chr1	207539723	207540286	MLT2B2	-	LTR/ERVL	MLT2B2	14.1813	1.3282	10.6771	7.51001e-05	Yes	5413	ENSG00000196352	CD55
chr1	9988088	9988379	AluSp	+	SINE/Alu	AluSp	38.2241	99.813	-2.61126	7.52093e-05	Yes	0	ENSG00000162441	LZIC
chr19	35821818	35822124	AluSz	-	SINE/Alu	AluSz	5.68888	0.395628	14.3793	7.58481e-05	Yes	0	ENSG00000012124	CD22
chr3	44534355	44534420	MLT1A	+	LTR/ERVL-MaLR	MLT1A	2.62472	16.5867	-6.31941	7.58481e-05	Yes	6043	ENSG00000178917	ZNF852
chr6	41071887	41072667	L2a	-	LINE/L2	L2a	5.37027	26.832	-4.99639	7.58481e-05	Yes	4173	ENSG00000001167	NFYA
chr8	67348667	67349676	L2a	-	LINE/L2	L2a	11.4318	0.907127	12.6022	7.58481e-05	Yes	0	ENSG00000147576	ADHFE1
chr6	34453063	34453891	L2a	-	LINE/L2	L2a	2.11326	0.435928	4.84773	7.68757e-05	Yes	0	ENSG00000124507	PACSIN1
chr7	155191409	155191699	MLT1C	+	LTR/ERVL-MaLR	MLT1C	3.95349	0.395245	10.0026	7.68757e-05	Yes	2359	ENSG00000218672	AC008060.7
chr8	38604546	38605562	L1MC1	+	LINE/L1	L1MC1	15.1224	1.42352	10.6233	7.68757e-05	Yes	0	ENSG00000147526	TACC1
chr19	45987031	45987341	AluSx	-	SINE/Alu	AluSx	6.92499	33.029	-4.76954	7.68854e-05	Yes	1207	ENSG00000125744	RTN2
chr4	35860552	35866631	LTR12F|HERV9-int|HERV9-int|LTR12F	-	LTR/ERV1	HERV9-int	7.3466	0.501348	14.6537	7.68854e-05	Yes	83213	ENSG00000047365	ARAP2
chr19	38079279	38079618	L1PA16	+	LINE/L1	L1PA16	2.33092	18.547	-7.95694	7.71495e-05	Yes	0	ENSG00000171817	ZNF540
chr16	72566831	72566970	Charlie15a	-	DNA/hAT-Charlie	Charlie15a	2.00435	14.2839	-7.12647	7.72132e-05	Yes	249815	ENSG00000140836	ZFHX3
chr22	30808843	30809253	L2c	-	LINE/L2	L2c	6.55959	0.612775	10.7047	7.76018e-05	Yes	0	ENSG00000099999	RNF215
chr10	112263361	112263517	MIR3	-	SINE/MIR	MIR3	1.9003	0.394765	4.81375	7.76249e-05	Yes	0	ENSG00000138166	DUSP5
chr1	210339629	210339906	AluJb	+	SINE/Alu	AluJb	8.27154	37.9149	-4.58377	7.76656e-05	Yes	1994	ENSG00000143469	SYT14
chr17	80628857	80629033	HAL1	-	LINE/L1	HAL1	3.76791	0.435492	8.65206	7.76656e-05	Yes	0	ENSG00000141542	RAB40B
chr6	95256632	95257033	MLT2C1	-	LTR/ERVL	MLT2C1	5.56247	0.394878	14.0866	7.76656e-05	Yes	-768387	ENSG00000172469	MANEA
chrX	111867913	111868095	L2	-	LINE/L2	L2	3.77254	0.435882	8.65496	7.79148e-05	Yes	5782	ENSG00000182508	LHFPL1
chr19	18719498	18720217	L2b	+	LINE/L2	L2b	7.41756	0.733076	10.1184	7.81315e-05	Yes	0	ENSG00000105696	TMEM59L
chr6	157626299	157626883	MLT1L	-	LTR/ERVL-MaLR	MLT1L	6.6397	0.556256	11.9364	7.81954e-05	Yes	83536	ENSG00000215712	TMEM242
chr15	45655200	45655468	AluSz	+	SINE/Alu	AluSz	21.9557	1.73968	12.6206	7.83105e-05	Yes	0	ENSG00000171766	GATM
chr15	84252740	84253225	MLT1D	-	LTR/ERVL-MaLR	MLT1D	13.8345	1.07761	12.8382	7.83105e-05	Yes	0	ENSG00000140600	SH3GL3
chr7	96604290	96604681	L2b	+	LINE/L2	L2b	0.993996	17.215	-17.319	7.83105e-05	Yes	-30180	ENSG00000006377	DLX6
chr21	15263904	15265611	MSTA|MSTA-int	-	LTR/ERVL-MaLR	MSTA-int	3.66252	0.482963	7.58345	7.84931e-05	Yes	-210446	ENSG00000269011	AL050303.1
chr1	151823905	151824160	MamTip1	-	DNA/hAT-Tip100	MamTip1	20.3363	4.05274	5.01791	7.85777e-05	Yes	0	ENSG00000196407	THEM5
chr10	98748565	98748747	MER58A	+	DNA/hAT-Charlie	MER58A	2.01363	14.096	-7.00027	7.8594e-05	Yes	2984	ENSG00000155640	C10orf12
chr17	36723203	36723452	AluJr	-	SINE/Alu	AluJr	9.21465	0.647057	14.2409	7.8645e-05	Yes	0	ENSG00000017373	SRCIN1
chr17	61793120	61793455	L1ME3F	-	LINE/L1	L1ME3F	6.92241	36.3202	-5.24676	7.8645e-05	Yes	0	ENSG00000266173	STRADA
chr1	213129951	213130190	L1ME4c	-	LINE/L1	L1ME4c	2.83778	22.0826	-7.78165	7.87105e-05	Yes	0	ENSG00000143494	VASH2
chr8	42984255	42984801	L1M4	-	LINE/L1	L1M4	41.6099	143.14	-3.44003	7.87105e-05	Yes	5679	ENSG00000185900	POMK
chr2	48828382	48829037	L2a	-	LINE/L2	L2a	2.17996	19.6076	-8.99444	7.92474e-05	Yes	0	ENSG00000068781	STON1-GTF2A1L
chr13	102981199	102982984	L2a	+	LINE/L2	L2a	16.9705	1.11488	15.2218	7.9443e-05	Yes	0	ENSG00000102466	FGF14
chr10	20360995	20361327	AluSp	+	SINE/Alu	AluSp	8.90536	0.665988	13.3716	7.95348e-05	Yes	0	ENSG00000120594	PLXDC2
chr10	88809162	88809456	AluJb	+	SINE/Alu	AluJb	15.7295	1.44433	10.8905	7.95348e-05	Yes	788	ENSG00000148672	GLUD1
chr10	88806477	88806805	AluJo	+	SINE/Alu	AluJo	11.3983	1.08458	10.5094	8.02874e-05	Yes	3439	ENSG00000148672	GLUD1
chr19	53858847	53859288	L1M3	-	LINE/L1	L1M3	5.86288	23.1172	-3.94298	8.02874e-05	Yes	726	ENSG00000213799	ZNF845
chr1	160056637	160057020	L3	+	LINE/CR1	L3	16.448	2.27136	7.24147	8.03891e-05	Yes	0	ENSG00000162728	KCNJ9
chr14	58578398	58578711	AluJr	-	SINE/Alu	AluJr	1.08506	8.2379	-7.59212	8.05784e-05	Yes	0	ENSG00000139971	C14orf37
chr19	46529281	46530232	L2	+	LINE/L2	L2	12.9105	0.937618	13.7695	8.05784e-05	Yes	-2959	ENSG00000008438	PGLYRP1
chr3	58408386	58408492	MamSINE1	+	SINE/tRNA-RTE	MamSINE1	24.0584	1.55999	15.4221	8.07478e-05	Yes	0	ENSG00000168297	PXK
chr22	38408396	38409036	L1MD3	-	LINE/L1	L1MD3	10.502	0.716138	14.6648	8.08755e-05	Yes	0	ENSG00000100142	POLR2F
chr20	44854697	44854870	L2c	+	LINE/L2	L2c	3.69713	0.435807	8.48341	8.09791e-05	Yes	0	ENSG00000149654	CDH22
chr5	146364572	146364881	AluSx4	-	SINE/Alu	AluSx4	4.31441	0.395719	10.9027	8.10085e-05	Yes	0	ENSG00000156475	PPP2R2B
chr1	46688564	46688889	AluSz	-	SINE/Alu	AluSz	11.0047	1.16422	9.45241	8.10182e-05	Yes	1632	ENSG00000171357	LURAP1
chr7	117833156	117833368	MER58A	-	DNA/hAT-Charlie	MER58A	11.5934	49.8284	-4.29798	8.10182e-05	Yes	279	ENSG00000128534	NAA38
chrX	70387914	70388193	AluJr	+	SINE/Alu	AluJr	19.3184	3.12415	6.18358	8.10182e-05	Yes	0	ENSG00000196338	NLGN3
chr5	10629482	10630075	L2c	-	LINE/L2	L2c	2.66671	0.435995	6.11637	8.11249e-05	Yes	0	ENSG00000164236	ANKRD33B
chr5	178510666	178510796	L1MEf	+	LINE/L1	L1MEf	3.87708	23.015	-5.93618	8.11249e-05	Yes	129	ENSG00000177932	ZNF354C
chr8	126325018	126325243	L2b	-	LINE/L2	L2b	3.47776	0.456945	7.61088	8.11249e-05	Yes	0	ENSG00000156831	NSMCE2
chr5	149603174	149603470	Charlie8	-	DNA/hAT-Charlie	Charlie8	7.07676	0.61542	11.4991	8.14655e-05	Yes	0	ENSG00000070808	CAMK2A
chr9	138043845	138044327	LTR78	-	LTR/ERV1	LTR78	3.56063	0.393768	9.04245	8.15047e-05	Yes	30821	ENSG00000130558	OLFM1
chr19	53018216	53018516	AluSq2	-	SINE/Alu	AluSq2	3.07885	17.2031	-5.58751	8.20847e-05	Yes	2810	ENSG00000258405	ZNF578
chr1	237269169	237269916	L2a	-	LINE/L2	L2a	6.95629	0.545274	12.7574	8.24329e-05	Yes	0	ENSG00000198626	RYR2
chr3	170154088	170154404	AluSx	+	SINE/Alu	AluSx	5.27329	0.503028	10.4831	8.24329e-05	Yes	0	ENSG00000013297	CLDN11
chr6	26173253	26173548	AluY	-	SINE/Alu	AluY	3.50899	24.5535	-6.99732	8.24329e-05	Yes	1677	ENSG00000158373	HIST1H2BD
chr13	100146518	100147601	MER11B	-	LTR/ERVK	MER11B	19.5682	2.68381	7.2912	8.25356e-05	Yes	-6071	ENSG00000125304	TM9SF2
chr12	34186193	34186700	L3	+	LINE/CR1	L3	4.0773	19.4573	-4.7721	8.27349e-05	Yes	3565	ENSG00000139133	ALG10
chr13	102012602	102012883	AluSz	-	SINE/Alu	AluSz	7.36753	0.532103	13.8461	8.31037e-05	Yes	0	ENSG00000102452	NALCN
chr16	30840152	30840645	L2c	+	LINE/L2	L2c	9.79549	44.8703	-4.58071	8.40591e-05	Yes	4303	ENSG00000099385	BCL7C
chr19	37978302	37978448	L2a	-	LINE/L2	L2a	3.69051	19.4794	-5.27824	8.40591e-05	Yes	2043	ENSG00000171827	ZNF570
chr20	45312478	45312761	L2b	+	LINE/L2	L2b	8.82357	33.6737	-3.81634	8.42035e-05	Yes	244	ENSG00000172315	TP53RK
chr2	99015616	99016413	L1MD3	+	LINE/L1	L1MD3	2.84404	21.275	-7.48054	8.45102e-05	Yes	553	ENSG00000144191	CNGA3
chr11	66110297	66110803	L2	+	LINE/L2	L2	2.76559	0.456541	6.0577	8.49537e-05	Yes	0	ENSG00000174744	BRMS1
chr7	13144197	13144458	AluJr	+	SINE/Alu	AluJr	3.1878	0.393956	8.09175	8.51003e-05	Yes	413639	ENSG00000122644	ARL4A
chr6	111898606	111898875	AluJb	-	SINE/Alu	AluJb	28.3564	80.8082	-2.84973	8.53104e-05	Yes	0	ENSG00000056972	TRAF3IP2
chr9	124749774	124750823	L2c	+	LINE/L2	L2c	136.331	40.2738	3.38511	8.53104e-05	Yes	0	ENSG00000175764	TTLL11
chr6	84735250	84735692	L1MA4	+	LINE/L1	L1MA4	7.08837	0.708171	10.0094	8.54944e-05	Yes	-7784	ENSG00000135324	MRAP2
chr4	21681296	21682694	Tigger1	-	DNA/TcMar-Tigger	Tigger1	5.70601	0.572347	9.96948	8.61137e-05	Yes	0	ENSG00000185774	KCNIP4
chr1	46691045	46691105	MIRb	-	SINE/MIR	MIRb	7.30299	0.716671	10.1902	8.61849e-05	Yes	4113	ENSG00000171357	LURAP1
chr11	66067672	66068108	MLT1H	+	LTR/ERVL-MaLR	MLT1H	15.0564	2.24206	6.71543	8.61849e-05	Yes	3538	ENSG00000179292	TMEM151A
chr7	142602132	142603533	HERV35I-int	-	LTR/ERV1	HERV35I-int	3.87748	0.435789	8.8976	8.61849e-05	Yes	1735	ENSG00000127412	TRPV5
chr2	239753319	239753627	AluSx	-	SINE/Alu	AluSx	6.36231	0.501416	12.6887	8.69451e-05	Yes	-3047	ENSG00000233608	TWIST2
chr7	1483110	1483503	MLT1C2	+	LTR/ERVL-MaLR	MLT1C2	14.047	0.955967	14.694	8.69451e-05	Yes	0	ENSG00000164877	MICALL2
chr5	80371741	80373390	L2a	-	LINE/L2	L2a	6.38914	0.524259	12.187	8.71008e-05	Yes	0	ENSG00000113319	RASGRF2
chr12	108649698	108649855	MER63A	+	DNA/hAT-Blackjack	MER63A	6.55332	0.680421	9.63128	8.73988e-05	Yes	5385	ENSG00000075035	WSCD2
chr20	23617497	23617820	L1MC4	+	LINE/L1	L1MC4	16.0344	1.67891	9.55043	8.78841e-05	Yes	0	ENSG00000101439	CST3
chr9	99906186	99908432	MSTA|MSTA-int|MSTA|MSTA|MSTA-int	-	LTR/ERVL-MaLR	MSTA-int	8.86335	0.758638	11.6832	8.78841e-05	Yes	-92334	ENSG00000197816	CCDC180
chr2	46991463	46992285	L2b	-	LINE/L2	L2b	28.0565	6.3446	4.42211	8.79476e-05	Yes	1196	ENSG00000171150	SOCS5
chr10	119244500	119244697	L2b	-	LINE/L2	L2b	103.125	17.6735	5.83504	8.81107e-05	Yes	-57259	ENSG00000170370	EMX2
chr5	760316	760691	MLT1B	+	LTR/ERVL-MaLR	MLT1B	7.68959	0.750414	10.2471	8.83307e-05	Yes	0	ENSG00000188818	ZDHHC11
chr12	23681460	23681632	MER5A	-	DNA/hAT-Charlie	MER5A	11.975	58.3741	-4.87469	8.84522e-05	Yes	809	ENSG00000134532	SOX5
chr22	18074315	18074625	AluY	+	SINE/Alu	AluY	28.2919	7.95213	3.55778	8.84636e-05	Yes	278	ENSG00000131100	ATP6V1E1
chr20	5975900	5976389	MLT1N2	-	LTR/ERVL-MaLR	MLT1N2	2.68557	15.9835	-5.95163	8.90202e-05	Yes	49	ENSG00000125885	MCM8
chr8	42980428	42980747	AluY	-	SINE/Alu	AluY	16.9888	62.6341	-3.68679	8.94434e-05	Yes	1852	ENSG00000185900	POMK
chr10	119247591	119247649	Tigger13a	-	DNA/TcMar-Tigger	Tigger13a	34.9056	5.18393	6.73343	8.95165e-05	Yes	-54307	ENSG00000170370	EMX2
chr12	7292540	7292934	L2a	-	LINE/L2	L2a	6.55111	0.640277	10.2317	8.95165e-05	Yes	0	ENSG00000139182	CLSTN3
chr12	111386125	111386556	MLT1C2	-	LTR/ERVL-MaLR	MLT1C2	6.45335	0.545668	11.8265	8.95165e-05	Yes	-27600	ENSG00000111245	MYL2
chr6	52275303	52275647	L2a	-	LINE/L2	L2a	4.2323	0.531018	7.97017	8.95165e-05	Yes	2729	ENSG00000170915	PAQR8
chr8	101926993	101927432	MER1A	-	DNA/hAT-Charlie	MER1A	20.3549	3.7593	5.41456	8.95165e-05	Yes	1322	ENSG00000164924	YWHAZ
chr1	153578800	153579055	LTR9B	+	LTR/ERV1	LTR9B	12.5845	1.09802	11.4611	9.04138e-05	Yes	308	ENSG00000188643	S100A16
chr11	18754534	18754742	MIRb	+	SINE/MIR	MIRb	7.2828	0.702339	10.3694	9.04138e-05	Yes	0	ENSG00000110786	PTPN5
chr5	140494104	140496069	L1M4	+	LINE/L1	L1M4	3.25178	23.6043	-7.2589	9.04138e-05	Yes	-5513	ENSG00000081818	PCDHB4
chr9	33579508	33581733	MSTA-int|MSTA|MSTA|MSTA-int|MSTA	+	LTR/ERVL-MaLR	MSTA-int	7.77611	0.737711	10.5409	9.04138e-05	Yes	6502	ENSG00000230453	ANKRD18B
chr19	12023735	12024021	AluY	+	SINE/Alu	AluY	1.71998	14.6346	-8.50857	9.04153e-05	Yes	0	ENSG00000198429	ZNF69
chr3	186017630	186017925	AluSz	-	SINE/Alu	AluSz	3.00387	0.394851	7.60759	9.05377e-05	Yes	0	ENSG00000058866	DGKG
chr1	205481217	205481532	L2	-	LINE/L2	L2	4.16561	0.393766	10.5789	9.13826e-05	Yes	0	ENSG00000117266	CDK18
chr10	66452276	66452757	LTR72	+	LTR/ERV1	LTR72	9.39923	0.815904	11.52	9.13826e-05	Yes	1067394	ENSG00000165476	REEP3
chr14	92965867	92966162	AluJr	-	SINE/Alu	AluJr	14.4782	1.08637	13.3271	9.13826e-05	Yes	3272	ENSG00000140090	SLC24A4
chr17	6371912	6373219	L2	+	LINE/L2	L2	5.55226	0.535494	10.3685	9.20309e-05	Yes	0	ENSG00000091622	PITPNM3
chr8	91838142	91838583	L2c	-	LINE/L2	L2c	12.4894	1.18855	10.5082	9.20309e-05	Yes	0	ENSG00000123119	NECAB1
chr1	52905261	52905961	L1MB7	+	LINE/L1	L1MB7	6.31058	30.84	-4.88703	9.23547e-05	Yes	0	ENSG00000134744	ZCCHC11
chr15	25395904	25401178	L1MC3	+	LINE/L1	L1MC3	7.52061	0.592978	12.6828	9.23547e-05	Yes	150482	ENSG00000214265	SNURF
chr22	34588759	34588920	MamSINE1	-	SINE/tRNA-RTE	MamSINE1	6.30867	0.500883	12.5951	9.24387e-05	Yes	-269931	ENSG00000133424	LARGE
chr6	73441846	73442088	L2c	-	LINE/L2	L2c	1.67424	0.39534	4.23494	9.24387e-05	Yes	0	ENSG00000185760	KCNQ5
chr17	41974987	41975261	L2c	+	LINE/L2	L2c	4.31484	0.525387	8.21268	9.2553e-05	Yes	0	ENSG00000108852	MPP2
chr9	109617900	109618065	MER2	-	DNA/TcMar-Tigger	MER2	0.626977	6.49081	-10.3526	9.34761e-05	Yes	-7314	ENSG00000148143	ZNF462
chr1	16862339	16862499	L2	+	LINE/L2	L2	3.56559	19.0954	-5.35545	9.37253e-05	Yes	-3063	ENSG00000268674	FAM231B
chr9	38562354	38564717	MSTA-int|MSTA|MSTA-int|MSTA|MSTA|MSTA-int	-	LTR/ERVL-MaLR	MSTA-int	23.861	2.09952	11.365	9.38326e-05	Yes	0	ENSG00000273170	ANKRD18A
chr2	96995709	96996015	AluJb	+	SINE/Alu	AluJb	2.48633	14.1399	-5.68706	9.38503e-05	Yes	1619	ENSG00000198885	ITPRIPL1
chr2	11290801	11291470	MER4A	+	LTR/ERV1	MER4A	37.9762	8.41063	4.51526	9.40249e-05	Yes	-3855	ENSG00000162976	PQLC3
chr11	8056611	8056971	MER96B	+	DNA/hAT-Tip100	MER96B	7.07684	0.528337	13.3946	9.43092e-05	Yes	0	ENSG00000166402	TUB
chr19	56149034	56149284	MIR	+	SINE/MIR	MIR	22.0027	1.77157	12.4199	9.60984e-05	Yes	0	ENSG00000213015	ZNF580
chr8	142519006	142520141	L1MB1	+	LINE/L1	L1MB1	2.7936	0.395147	7.06978	9.60984e-05	Yes	-4598	ENSG00000226490	AC138647.1
chr9	109616493	109616688	MIR	-	SINE/MIR	MIR	1.08303	9.36791	-8.6497	9.67688e-05	Yes	-8691	ENSG00000148143	ZNF462
chr17	26929616	26929907	AluSz6	-	SINE/Alu	AluSz6	16.2611	1.60385	10.1388	9.68824e-05	Yes	0	ENSG00000258472	RP11-192H23.4
chr20	25054752	25054957	MIR	-	SINE/MIR	MIR	1.59624	0.394908	4.04206	9.7062e-05	Yes	0	ENSG00000100987	VSX1
chr1	247538153	247538842	LTR8	+	LTR/ERV1	LTR8	17.2356	3.18238	5.41595	9.75448e-05	Yes	-40617	ENSG00000162711	NLRP3
chr1	205524498	205524924	L4_A_Mam	-	LINE/RTE-X	L4_A_Mam	31.8837	2.74727	11.6056	9.79466e-05	Yes	-13090	ENSG00000174514	MFSD4
chr10	70654497	70654778	AluJr	-	SINE/Alu	AluJr	13.3518	1.31001	10.1922	9.80279e-05	Yes	0	ENSG00000165730	STOX1
chr4	96345654	96345973	AluY	-	SINE/Alu	AluY	3.09052	0.435646	7.09412	9.80279e-05	Yes	0	ENSG00000182168	UNC5C
chr16	24877912	24879175	L1M4	+	LINE/L1	L1M4	3.77173	0.395934	9.52616	9.80768e-05	Yes	0	ENSG00000158865	SLC5A11
chr10	88805445	88805724	AluSx4	-	SINE/Alu	AluSx4	12	0.947754	12.6615	9.81183e-05	Yes	4520	ENSG00000148672	GLUD1
chr22	51091669	51092218	MER41A	-	LTR/ERV1	MER41A	6.62226	0.602109	10.9984	9.81183e-05	Yes	-20626	ENSG00000251322	SHANK3
chr21	15266295	15268716	MSTA-int|MSTA|MSTA-int|MSTA|MSTA|MSTA-int	-	LTR/ERVL-MaLR	MSTA-int	4.41897	0.480696	9.19285	9.81263e-05	Yes	212419	ENSG00000188992	LIPI
chr5	702317	702585	MSTB|MSTB-int	+	LTR/ERVL-MaLR	MSTB-int	9.4703	0.773918	12.2368	9.81263e-05	Yes	7887	ENSG00000188818	ZDHHC11
chr10	15118503	15118801	AluSx	-	SINE/Alu	AluSx	180.362	57.8864	3.11579	9.87216e-05	Yes	722	ENSG00000176244	ACBD7
chr6	3257740	3258113	L1ME2	+	LINE/L1	L1ME2	1.97839	15.6736	-7.92236	9.87216e-05	Yes	0	ENSG00000180822	PSMG4
chr20	1672225	1673558	L1PA7	+	LINE/L1	L1PA7	5.68127	0.516446	11.0007	9.89198e-05	Yes	-33801	ENSG00000089012	SIRPG
chr5	171635788	171636048	AluJb	-	SINE/Alu	AluJb	2.54502	12.6426	-4.96757	9.89695e-05	Yes	597	ENSG00000168246	UBTD2
chr1	45093461	45093658	MER91A	-	DNA/hAT-Tip100	MER91A	4.20916	0.394668	10.6651	0.000100024	Yes	0	ENSG00000187147	RNF220
chr16	57699110	57699364	Charlie8	-	DNA/hAT-Charlie	Charlie8	3.88969	24.8517	-6.38911	0.000100024	Yes	167	ENSG00000205336	GPR56
chr12	79702023	79702318	AluSp	+	SINE/Alu	AluSp	12.6662	0.892957	14.1845	0.000100243	Yes	0	ENSG00000067715	SYT1
chr2	58270450	58271027	L1ME1	-	LINE/L1	L1ME1	19.2005	4.10337	4.67919	0.000100243	Yes	0	ENSG00000028116	VRK2
chr21	45896344	45897365	MER50-int	+	LTR/ERV1	MER50-int	1.41656	11.3804	-8.03383	0.000100243	Yes	14267	ENSG00000269430	LRRC3DN
chr8	89898533	89898873	MER1B	+	DNA/hAT-Charlie	MER1B	7.11918	0.613676	11.6009	0.000100243	Yes	-558280	ENSG00000156103	MMP16
chr10	91040872	91041274	MER31B	+	LTR/ERV1	MER31B	10.6327	0.853273	12.4611	0.000100674	Yes	0	ENSG00000107798	LIPA
chr10	71258377	71258600	MIR	-	SINE/MIR	MIR	3.37917	0.437701	7.72026	0.000101294	Yes	0	ENSG00000099282	TSPAN15
chr15	65334740	65334927	L2c	+	LINE/L2	L2c	10.2687	0.82292	12.4784	0.000101411	Yes	-2782	ENSG00000186198	SLC51B
chr11	74972407	74972609	Charlie15a	-	DNA/hAT-Charlie	Charlie15a	402.844	156.127	2.58023	0.000101504	Yes	2618	ENSG00000137486	ARRB1
chr12	45397375	45399696	L2b	+	LINE/L2	L2b	4.38296	0.555046	7.89657	0.000101504	Yes	8760	ENSG00000185610	DBX2
chr6	147162754	147162966	MIR	-	SINE/MIR	MIR	17.7024	1.57386	11.2478	0.000101504	Yes	26157	ENSG00000118492	ADGB
chrX	28998924	28999237	AluJo	+	SINE/Alu	AluJo	4.92431	0.434662	11.3291	0.000101733	Yes	0	ENSG00000169306	IL1RAPL1
chr16	72479932	72482317	L1MA10	-	LINE/L1	L1MA10	2.10723	22.4231	-10.641	0.000102359	Yes	-269156	ENSG00000118557	PMFBP1
chr1	40117420	40117732	AluSx1	+	SINE/Alu	AluSx1	10.0422	1.00999	9.94287	0.00010258	Yes	7062	ENSG00000116981	NT5C1A
chr1	149820500	149820779	L2	+	LINE/L2	L2	4.23685	24.3776	-5.75371	0.00010258	Yes	-1865	ENSG00000203812	HIST2H2AA4
chr7	73473502	73473652	MIRb	-	SINE/MIR	MIRb	2.56242	0.435343	5.886	0.00010258	Yes	0	ENSG00000049540	ELN
chr10	102032201	102033150	L1MA4	+	LINE/L1	L1MA4	45.717	14.1133	3.23928	0.000103086	Yes	564	ENSG00000196072	BLOC1S2
chr14	68036149	68036222	L3	-	LINE/CR1	L3	11.3453	0.659681	17.1981	0.000103452	Yes	0	ENSG00000054690	PLEKHH1
chr6	141773962	141781817	LTR7|HERVH-int|HERVH-int|LTR7	+	LTR/ERV1	HERVH-int	5.2672	0.533219	9.87813	0.000103655	Yes	597651	ENSG00000135577	NMBR
chr16	72567558	72567831	AluSx	-	SINE/Alu	AluSx	2.85068	17.8617	-6.26577	0.000103676	Yes	248954	ENSG00000140836	ZFHX3
chr4	99440	101224	MER61-int|MER61C	+	LTR/ERV1	MER61-int	17.7762	1.66258	10.6919	0.000103745	Yes	11342	ENSG00000197701	ZNF595
chr19	23402192	23402477	AluSx1	-	SINE/Alu	AluSx1	2.65878	18.7171	-7.03974	0.000103795	Yes	1925	ENSG00000196081	ZNF724P
chr15	90817103	90817402	AluSz	-	SINE/Alu	AluSz	11.1337	37.0599	-3.32864	0.000104214	Yes	641	ENSG00000182768	NGRN
chr1	182348685	182348970	AluJb	-	SINE/Alu	AluJb	11.838	1.43659	8.2403	0.000104253	Yes	1870	ENSG00000135821	GLUL
chr12	111387777	111389721	SVA_D	-	Retroposon/SVA	SVA_D	11.9112	0.973483	12.2356	0.000104327	Yes	-29252	ENSG00000111245	MYL2
chr19	48552053	48552464	MSTB1	+	LTR/ERVL-MaLR	MSTB1	7.29835	0.547334	13.3344	0.000104402	Yes	0	ENSG00000105499	PLA2G4C
chr7	4991100	4991183	L2a	+	LINE/L2	L2a	3.42677	0.435816	7.86289	0.000105137	Yes	0	ENSG00000136297	MMD2
chr11	66053806	66054117	AluSz6	+	SINE/Alu	AluSz6	6.80312	32.3162	-4.7502	0.000105379	Yes	0	ENSG00000174851	YIF1A
chr16	88742340	88742703	MLT1B	+	LTR/ERVL-MaLR	MLT1B	41.2699	11.9851	3.44342	0.000105387	Yes	1388	ENSG00000185669	SNAI3
chr21	33821377	33821898	L1MC1	-	LINE/L1	L1MC1	3.66029	0.435377	8.40717	0.000105665	Yes	0	ENSG00000166979	EVA1C
chr15	25500761	25506894	L1PA5	+	LINE/L1	L1PA5	223.862	46.3994	4.82467	0.000106008	Yes	75488	ENSG00000114062	UBE3A
chr18	51678309	51678782	L2c	-	LINE/L2	L2c	59.6625	11.1833	5.33495	0.00010687	Yes	298	ENSG00000134046	MBD2
chr1	115583282	115585772	L1MA4	+	LINE/L1	L1MA4	1.89016	11.4589	-6.06239	0.000106998	Yes	4861	ENSG00000134198	TSPAN2
chr10	1181206	1181352	MER5A	+	DNA/hAT-Charlie	MER5A	42.3034	9.78113	4.325	0.000106998	Yes	2970	ENSG00000047056	WDR37
chr5	54811288	54812187	L2a	+	LINE/L2	L2a	5.11332	0.552717	9.25125	0.000107178	Yes	0	ENSG00000067113	PPAP2A
chr17	77343152	77344625	L1MEh	-	LINE/L1	L1MEh	5.09951	0.529041	9.63916	0.000107353	Yes	0	ENSG00000167281	RBFOX3
chrX	111872868	111873291	L2c	+	LINE/L2	L2c	8.59228	0.759251	11.3168	0.000107435	Yes	586	ENSG00000182508	LHFPL1
chr10	88803591	88803895	AluSx1	+	SINE/Alu	AluSx1	9.75693	0.752711	12.9624	0.000107674	Yes	6349	ENSG00000148672	GLUD1
chr6	166687175	166687520	L1MC5a	-	LINE/L1	L1MC5a	14.9368	1.55223	9.62276	0.000108329	Yes	31649	ENSG00000176381	PRR18
chr4	109547604	109547894	AluSx1	-	SINE/Alu	AluSx1	4.41993	21.7216	-4.91446	0.000108367	Yes	0	ENSG00000109475	RPL34
chr19	55645585	55645642	MIRc	-	SINE/MIR	MIRc	0.930006	15.8056	-16.9952	0.000108444	Yes	0	ENSG00000105048	TNNT1
chr5	125828132	125828427	AluJb	+	SINE/Alu	AluJb	8.89103	0.54888	16.1985	0.000108444	Yes	0	ENSG00000155324	GRAMD3
chr2	91770034	91771184	HSMAR2	+	DNA/TcMar-Mariner	HSMAR2	6.34744	0.630587	10.0659	0.000109306	Yes	-1231638	ENSG00000228325	RP11-685N3.1
chr4	352661	353319	L1M3a	-	LINE/L1	L1M3a	6.12402	25.6035	-4.18083	0.000109388	Yes	0	ENSG00000131127	ZNF141
chr2	142822732	142824897	MLT1D|MLT1D-int|MLT1D-int|MLT1D	-	LTR/ERVL-MaLR	MLT1D-int	4.23496	0.454916	9.30931	0.000109741	Yes	0	ENSG00000168702	LRP1B
chr4	21353776	21359954	L1PA6	+	LINE/L1	L1PA6	2.64377	0.482959	5.47412	0.000110272	Yes	0	ENSG00000185774	KCNIP4
chr1	173767773	173768183	L2a	+	LINE/L2	L2a	4.89979	26.7655	-5.46257	0.000110491	Yes	506	ENSG00000120334	CENPL
chr22	35230599	35236015	LTR7|HERVH-int|HERVH-int|HERVH-int|HERVH-int|HERVH-int|HERVH-int|HERVH-int|LTR7	+	LTR/ERV1	HERVH-int	5.73329	0.587883	9.75243	0.000111633	Yes	-226115	ENSG00000175329	ISX
chr5	140602539	140602777	L1MC5a	+	LINE/L1	L1MC5a	3.46872	18.6331	-5.37177	0.000111633	Yes	-155	ENSG00000120327	PCDHB14
chr5	167299022	167299298	AluSz	+	SINE/Alu	AluSz	5.47173	0.50411	10.8542	0.00011177	Yes	0	ENSG00000145934	TENM2
chr3	42825287	42825585	AluSx	+	SINE/Alu	AluSx	39.1144	12.9685	3.01611	0.000112355	Yes	0	ENSG00000181061	HIGD1A
chr6	26172432	26172725	AluSc8	+	SINE/Alu	AluSc8	9.15593	79.696	-8.7043	0.000112414	Yes	856	ENSG00000158373	HIST1H2BD
chr6	39830692	39830996	L2b	+	LINE/L2	L2b	3.37308	0.395893	8.52019	0.000112471	Yes	0	ENSG00000146122	DAAM2
chr19	9757762	9758055	AluSc	-	SINE/Alu	AluSc	4.61752	19.8822	-4.30581	0.000112697	Yes	1191	ENSG00000267106	C19orf82
chrX	139862129	139862369	MIRb	+	SINE/MIR	MIRb	17.5524	1.92813	9.10333	0.000112697	Yes	3057	ENSG00000184258	CDR1
chr21	44342876	44345058	HERVH48-int	-	LTR/ERV1	HERVH48-int	21.1269	2.50003	8.45065	0.000112771	Yes	9463	ENSG00000160194	NDUFV3
chr9	130173025	130173510	MER41A	-	LTR/ERV1	MER41A	42.1899	6.48043	6.51035	0.000112953	Yes	2323	ENSG00000136856	SLC2A8
chr1	236035314	236035619	AluSx	+	SINE/Alu	AluSx	2.67422	0.43729	6.11543	0.000113181	Yes	0	ENSG00000143669	LYST
chr1	44427860	44428619	L2c	+	LINE/L2	L2c	24.5058	1.93947	12.6353	0.00011322	Yes	0	ENSG00000117408	IPO13
chr12	110498042	110498558	L2	+	LINE/L2	L2	4.1149	0.455262	9.03854	0.0001139	Yes	0	ENSG00000174456	C12orf76
chr6	168222704	168223094	MSTA	-	LTR/ERVL-MaLR	MSTA	5.38246	32.0271	-5.95027	0.000114332	Yes	-4509	ENSG00000130396	MLLT4
chr11	83396331	83397628	L2a	+	LINE/L2	L2a	4.33891	0.478928	9.05962	0.000115135	Yes	0	ENSG00000150672	DLG2
chr12	113588205	113588998	L2a	+	LINE/L2	L2a	9.36285	0.962155	9.73112	0.000115466	Yes	0	ENSG00000186710	CCDC42B
chr12	45447167	45450035	L1PB1	+	LINE/L1	L1PB1	9.85832	0.870374	11.3265	0.000115589	Yes	-2286	ENSG00000185610	DBX2
chr11	113819093	113819302	MIRc	+	SINE/MIR	MIRc	5.47074	0.482877	11.3295	0.000115624	Yes	1807	ENSG00000149305	HTR3B
chr2	192995614	193000837	HERVH-int|HERVH-int|HERVH-int|HERVH-int|HERVH-int|HERVH-int|LTR7Y	+	LTR/ERV1	HERVH-int	28.231	3.93905	7.16697	0.000115837	Yes	0	ENSG00000144339	TMEFF2
chr4	156842685	156843890	MLT2A2|HERVL-int	-	LTR/ERVL	HERVL-int	18.7968	3.79398	4.95437	0.000116067	Yes	1128	ENSG00000151790	TDO2
chr20	31998294	31998715	L2a	+	LINE/L2	L2a	42.3174	8.84912	4.78211	0.00011622	Yes	0	ENSG00000101400	SNTA1
chr8	4085755	4086194	L2a	+	LINE/L2	L2a	8.68917	0.676674	12.841	0.000116503	Yes	0	ENSG00000183117	CSMD1
chr12	130638438	130639167	L2a	+	LINE/L2	L2a	2.69769	0.436716	6.17723	0.000116846	Yes	-7838	ENSG00000111432	FZD10
chr12	113412527	113413558	ERV3-16A3_I-int	+	LTR/ERVL	ERV3-16A3_I-int	16.4838	1.28039	12.874	0.000116857	Yes	1474	ENSG00000111331	OAS3
chr1	234475093	234476978	L1MB4	+	LINE/L1	L1MB4	3.36552	0.505095	6.66314	0.000117043	Yes	14832	ENSG00000183780	SLC35F3
chr1	44425064	44425261	MIRc	+	SINE/MIR	MIRc	13.138	1.26958	10.3483	0.000117808	Yes	0	ENSG00000117408	IPO13
chr8	124263284	124263621	MSTA	+	LTR/ERVL-MaLR	MSTA	7.83368	30.4534	-3.8875	0.000118116	Yes	0	ENSG00000259305	ZHX1-C8ORF76
chr6	32868687	32868780	Charlie2b	-	DNA/hAT-Charlie	Charlie2b	6.80787	28.8052	-4.23116	0.000118918	Yes	33627	ENSG00000242574	HLA-DMB
chr6	27681501	27681803	AluSz6	+	SINE/Alu	AluSz6	1.22842	8.5876	-6.99078	0.000119077	Yes	93455	ENSG00000185130	HIST1H2BL
chr18	3997966	3999272	L1MC5	-	LINE/L1	L1MC5	8.82986	0.806172	10.9528	0.000119136	Yes	0	ENSG00000170579	DLGAP1
chr1	32212333	32213074	L2b	+	LINE/L2	L2b	9.39788	0.857755	10.9564	0.000119454	Yes	0	ENSG00000121753	BAI2
chr5	140599064	140600044	L2c	+	LINE/L2	L2c	8.08073	38.9695	-4.82252	0.000119588	Yes	2072	ENSG00000187372	PCDHB13
chrX	153652679	153653056	MLT1C	-	LTR/ERVL-MaLR	MLT1C	68.5164	23.938	2.86225	0.000119741	Yes	2615	ENSG00000102125	TAZ
chr9	114308943	114311288	L1MB4	-	LINE/L1	L1MB4	239.691	65.1134	3.68114	0.000119749	Yes	0	ENSG00000173258	ZNF483
chr19	14597118	14597479	MLT1I	+	LTR/ERVL-MaLR	MLT1I	13.9936	1.3492	10.3718	0.000120774	Yes	0	ENSG00000123159	GIPC1
chr19	9403833	9404159	L1ME3	+	LINE/L1	L1ME3	7.64155	26.1094	-3.41677	0.000120913	Yes	793	ENSG00000196110	ZNF699
chr2	207671564	207677351	LTR7|HERVH-int|HERVH-int|HERVH-int|HERVH-int|HERVH-int|HERVH-int|LTR7	-	LTR/ERV1	HERVH-int	17.4418	1.46274	11.9241	0.00012108	Yes	14332	ENSG00000118246	FASTKD2
chr3	68040475	68041092	MLT2B3|MLT2B3	+	LTR/ERVL	MLT2B3	3.04322	0.436693	6.96879	0.000122211	Yes	-12268	ENSG00000183662	FAM19A1
chr9	91998316	91998692	L1MD3	+	LINE/L1	L1MD3	11.8228	1.47592	8.01048	0.000122448	Yes	0	ENSG00000187764	SEMA4D
chr7	4940790	4941085	AluSz	+	SINE/Alu	AluSz	30.211	7.36035	4.10456	0.00012254	Yes	4536	ENSG00000136297	MMD2
chr1	247261573	247261879	AluSx3	+	SINE/Alu	AluSx3	7.06937	32.3563	-4.57697	0.000122563	Yes	1386	ENSG00000188295	ZNF669
chr10	91040563	91040777	MamGypLTR4	-	LTR/Gypsy	MamGypLTR4	6.62457	0.646951	10.2397	0.000122563	Yes	0	ENSG00000107798	LIPA
chr17	72853338	72853576	MamTip2	-	DNA/hAT-Tip100	MamTip2	3.69106	0.395087	9.34239	0.000122958	Yes	0	ENSG00000161509	GRIN2C
chr3	179643774	179644581	L2a	+	LINE/L2	L2a	4.03149	0.48183	8.36705	0.000122958	Yes	0	ENSG00000114757	PEX5L
chr15	30261741	30262050	AluJo	+	SINE/Alu	AluJo	18.4455	2.81339	6.5563	0.000123004	Yes	-674	ENSG00000104067	TJP1
chr12	59716969	59722767	LTR7|HERVH-int|HERVH-int|HERVH-int|HERVH-int|HERVH-int|HERVH-int|LTR7	-	LTR/ERV1	HERVH-int	10.7204	0.937382	11.4366	0.000123261	Yes	194293	ENSG00000257230	RP11-272B17.2
chr17	27406270	27406523	MIRb	+	SINE/MIR	MIRb	25.0758	5.54106	4.52545	0.000123261	Yes	0	ENSG00000196535	MYO18A
chr4	21649357	21649410	MamTip3	-	DNA/hAT-Tip100	MamTip3	3.76805	0.395396	9.52983	0.000124459	Yes	0	ENSG00000185774	KCNIP4
chr8	142592262	142592453	MIR	+	SINE/MIR	MIR	1.9256	0.394416	4.88214	0.000124459	Yes	63426	ENSG00000226490	AC138647.1
chr11	12272548	12272784	MER5C1	+	DNA/hAT-Charlie	MER5C1	1.60019	0.395122	4.04986	0.000125327	Yes	0	ENSG00000133816	MICAL2
chr1	92654074	92654441	L2c	-	LINE/L2	L2c	36.6299	7.90911	4.63136	0.000125768	Yes	3795	ENSG00000069712	KIAA1107
chr16	24276279	24276585	AluJo	+	SINE/Alu	AluJo	6.63357	0.587121	11.2985	0.000125907	Yes	0	ENSG00000006116	CACNG3
chr21	15230647	15231196	LTR6A	+	LTR/ERV1	LTR6A	2.52766	0.395754	6.38696	0.000126013	Yes	-177189	ENSG00000269011	AL050303.1
chr3	159046065	159046451	L2c	-	LINE/L2	L2c	2.88862	0.436278	6.62106	0.000126013	Yes	0	ENSG00000250588	IQCJ-SCHIP1
chr1	4009469	4010012	MER41D	+	LTR/ERV1	MER41D	8.17697	0.913785	8.94846	0.000126403	Yes	-192613	ENSG00000198912	C1orf174
chr9	35864039	35864152	MIRc	+	SINE/MIR	MIRc	26.0804	7.07845	3.68448	0.000127638	Yes	5224	ENSG00000168828	OR13J1
chr1	31650962	31651337	AluSx1	+	SINE/Alu	AluSx1	0.732437	5.12227	-6.99346	0.000127661	Yes	1256	ENSG00000084628	NKAIN1
chr3	133468580	133469210	MER67B	-	LTR/ERV1	MER67B	4.01038	0.435135	9.21641	0.000127808	Yes	0	ENSG00000091513	TF
chr1	24294901	24295085	MIR	+	SINE/MIR	MIR	4.56017	24.7011	-5.41671	0.000128174	Yes	0	ENSG00000188529	SRSF10
chr15	35146627	35146761	MIR1_Amn	+	SINE/MIR	MIR1_Amn	9.76452	40.4052	-4.13797	0.000128666	Yes	972	ENSG00000021776	AQR
chr2	132578777	132578964	THE1C	-	LTR/ERVL-MaLR	THE1C	3.02154	0.395866	7.63272	0.00012945	Yes	-19544	ENSG00000186825	C2orf27B
chr5	109866637	109871214	LTR7|HERVH-int|HERVH-int|HERVH-int|HERVH-int|HERVH-int|HERVH-int|HERVH-int|LTR7	+	LTR/ERV1	HERVH-int	13.4127	1.08805	12.3273	0.00012945	Yes	0	ENSG00000186952	TMEM232
chr11	10514132	10514566	L2c	-	LINE/L2	L2c	2.77548	0.43586	6.36782	0.000129948	Yes	0	ENSG00000133805	AMPD3
chr13	67464503	67465008	MER67D	+	LTR/ERV1	MER67D	4.28559	0.532491	8.04818	0.000130804	Yes	0	ENSG00000184226	PCDH9
chr20	58237149	58237850	L2b	-	LINE/L2	L2b	3.35719	0.504556	6.65374	0.000131271	Yes	0	ENSG00000087495	PHACTR3
chr8	38607722	38608551	L1MEa	+	LINE/L1	L1MEa	9.38596	1.04072	9.01871	0.000131369	Yes	0	ENSG00000147526	TACC1
chr10	95551862	95552242	Charlie5	+	DNA/hAT-Charlie	Charlie5	8.51503	0.721097	11.8085	0.000131647	Yes	0	ENSG00000108231	LGI1
chr6	26175153	26175399	L1M5	-	LINE/L1	L1M5	7.90623	55.3512	-7.00096	0.000131809	Yes	3577	ENSG00000158373	HIST1H2BD
chr7	198238	198385	MIRb	+	SINE/MIR	MIRb	1.02402	9.48228	-9.25987	0.000131813	Yes	0	ENSG00000177706	FAM20C
chr11	66064712	66064886	MER91A	+	DNA/hAT-Tip100	MER91A	25.8206	5.26901	4.90047	0.000132065	Yes	578	ENSG00000179292	TMEM151A
chr4	21209454	21209764	AluSz	-	SINE/Alu	AluSz	6.06303	0.506558	11.9691	0.000132335	Yes	0	ENSG00000185774	KCNIP4
chr6	3469174	3469628	LTR7B	+	LTR/ERV1	LTR7B	41.0957	8.23301	4.99158	0.000132335	Yes	-11919	ENSG00000137266	SLC22A23
chr5	63626541	63628086	MER52A	+	LTR/ERV1	MER52A	9.88592	57.031	-5.76891	0.000132677	Yes	0	ENSG00000164197	RNF180
chr19	45987978	45988064	MER117	+	DNA/hAT-Charlie	MER117	2.33645	18.6886	-7.99875	0.000133271	Yes	484	ENSG00000125744	RTN2
chr15	101433421	101433683	L2d	-	LINE/L2	L2d	15.4233	1.29976	11.8663	0.000133519	Yes	0	ENSG00000184254	ALDH1A3
chr11	107835049	107835342	AluJb	-	SINE/Alu	AluJb	8.35439	38.686	-4.63062	0.000133636	Yes	842	ENSG00000179331	RAB39A
chr3	101555188	101555440	L2a	+	LINE/L2	L2a	12.6607	1.69276	7.4793	0.000133803	Yes	0	ENSG00000144802	NFKBIZ
chr4	79604562	79604972	L1ME4b	+	LINE/L1	L1ME4b	10.8852	0.910985	11.9488	0.000134466	Yes	72966	ENSG00000138772	ANXA3
chr4	86930046	86930953	L2a	+	LINE/L2	L2a	28.6186	5.48872	5.21408	0.000134499	Yes	5324	ENSG00000109339	MAPK10
chr5	43059214	43060683	L1PA6	+	LINE/L1	L1PA6	7.59102	0.747739	10.152	0.000134499	Yes	-4596	ENSG00000172262	ZNF131
chr5	150479222	150479392	MIR3	-	SINE/MIR	MIR3	29.0029	5.589	5.18929	0.00013555	Yes	882	ENSG00000197043	ANXA6
chr5	161589422	161589842	MSTB	+	LTR/ERVL-MaLR	MSTB	29.4198	6.27814	4.68607	0.000135601	Yes	6881	ENSG00000113327	GABRG2
chr6	87729018	87729596	L2c	+	LINE/L2	L2c	20.4178	2.3398	8.7263	0.000136376	Yes	2670	ENSG00000168830	HTR1E
chr1	108739176	108739427	MLT1A0	-	LTR/ERVL-MaLR	MLT1A0	4.1008	22.0534	-5.37783	0.000136829	Yes	0	ENSG00000085491	SLC25A24
chr1	39992523	39992643	MER117	-	DNA/hAT-Charlie	MER117	14.7944	1.47049	10.0609	0.000137093	Yes	917	ENSG00000183682	BMP8A
chr10	88804700	88804991	AluSx	-	SINE/Alu	AluSx	8.34656	0.606331	13.7657	0.000137467	Yes	5253	ENSG00000148672	GLUD1
chr5	764320	766021	LTR12C	+	LTR/ERV1	LTR12C	16.5286	1.53062	10.7986	0.000137467	Yes	0	ENSG00000188818	ZDHHC11
chr2	201262583	201262967	LTR16B	-	LTR/ERVL	LTR16B	6.20746	0.582171	10.6626	0.000137526	Yes	0	ENSG00000196141	SPATS2L
chr19	11918918	11919211	AluSg	+	SINE/Alu	AluSg	4.35706	18.5185	-4.25022	0.000137723	Yes	0	ENSG00000177599	ZNF491
chr3	185356493	185356798	AluSq2	+	SINE/Alu	AluSq2	0.739362	6.55642	-8.86766	0.000138172	Yes	4730	ENSG00000073792	IGF2BP2
chr9	32788268	32788534	L1ME4c	-	LINE/L1	L1ME4c	5.03904	0.581991	8.65828	0.000138247	Yes	872	ENSG00000188133	TMEM215
chr7	198457	198681	MER46C	+	DNA/TcMar-Tigger	MER46C	1.587	10.5877	-6.67149	0.000138752	Yes	0	ENSG00000177706	FAM20C
chr11	131259008	131259036	L2b	-	LINE/L2	L2b	4.03858	0.531619	7.59676	0.000138945	Yes	0	ENSG00000182667	NTM
chr2	73274959	73275188	L1ME4a	+	LINE/L1	L1ME4a	4.259	0.504947	8.43454	0.00013929	Yes	0	ENSG00000144040	SFXN5
chr20	47547868	47548695	L2a	-	LINE/L2	L2a	7.24914	0.695463	10.4235	0.000140205	Yes	0	ENSG00000124198	ARFGEF2
chr9	33594904	33596495	THE1D-int	+	LTR/ERVL-MaLR	THE1D-int	6.4721	0.673397	9.61113	0.000142422	Yes	21898	ENSG00000230453	ANKRD18B
chr2	8863232	8863634	MLT1J2	+	LTR/ERVL-MaLR	MLT1J2	71.6307	18.157	3.94508	0.000142563	Yes	1775	ENSG00000134313	KIDINS220
chr14	102416491	102416726	L2a	-	LINE/L2	L2a	14.9635	2.03489	7.3535	0.000142774	Yes	-14140	ENSG00000197102	DYNC1H1
chr8	102223140	102223360	MIR	-	SINE/MIR	MIR	6.39742	0.655505	9.75954	0.000143333	Yes	-4720	ENSG00000120963	ZNF706
chr10	81902223	81902479	Charlie4a	+	DNA/hAT-Charlie	Charlie4a	7.9042	0.578092	13.6729	0.000143548	Yes	0	ENSG00000189129	PLAC9
chr3	21429403	21431690	Tigger1	+	DNA/TcMar-Tigger	Tigger1	4.38399	0.589184	7.44077	0.000143626	Yes	28226	ENSG00000151789	ZNF385D
chr2	101628521	101629174	L1MB8	+	LINE/L1	L1MB8	5.3345	25.0653	-4.69872	0.000143842	Yes	0	ENSG00000071082	RPL31
chr11	65511326	65512945	MER52A	+	LTR/ERV1	MER52A	8.98905	0.873446	10.2915	0.00014411	Yes	-22909	ENSG00000172922	RNASEH2C
chr19	20724249	20724531	AluSz	-	SINE/Alu	AluSz	6.42005	23.4642	-3.65483	0.000144343	Yes	0	ENSG00000237440	ZNF737
chr11	65489617	65490094	MER90a	+	LTR/ERV1	MER90a	32.8476	6.0007	5.47396	0.000145095	Yes	-1200	ENSG00000172922	RNASEH2C
chr19	54945134	54945637	L2	+	LINE/L2	L2	37.9928	6.32352	6.00818	0.000145484	Yes	0	ENSG00000167614	TTYH1
chr3	159951918	159952422	LTR26B	-	LTR/ERV1	LTR26B	9.95331	0.955434	10.4176	0.000145484	Yes	0	ENSG00000248710	RP11-432B6.3
chr17	72851829	72852441	L3	-	LINE/CR1	L3	5.96022	0.505775	11.7843	0.000145618	Yes	0	ENSG00000161509	GRIN2C
chr14	101023974	101025053	L2	+	LINE/L2	L2	14.6437	1.4882	9.8399	0.000145784	Yes	0	ENSG00000183092	BEGAIN
chr7	96601031	96601302	L1MB7	+	LINE/L1	L1MB7	1.72047	25.2236	-14.6609	0.000145792	Yes	-33559	ENSG00000006377	DLX6
chr16	8946171	8946432	AluJo	+	SINE/Alu	AluJo	2.0067	13.8178	-6.88583	0.000146071	Yes	368	ENSG00000153048	CARHSP1
chr9	99902931	99905334	MSTA-int|MSTA|MSTA-int|MSTA|MSTA|MSTA-int	-	LTR/ERVL-MaLR	MSTA-int	9.39208	0.9894	9.49271	0.000146543	Yes	-95432	ENSG00000197816	CCDC180
chr20	43289389	43289810	MSTD	-	LTR/ERVL-MaLR	MSTD	11.6523	1.47867	7.88029	0.000146711	Yes	-8516	ENSG00000196839	ADA
chr17	72240824	72240986	L2c	-	LINE/L2	L2c	10.66	0.855302	12.4635	0.000147109	Yes	0	ENSG00000141540	TTYH2
chr1	40119598	40119756	MER117	+	DNA/hAT-Charlie	MER117	7.21053	0.544695	13.2377	0.000147323	Yes	5038	ENSG00000116981	NT5C1A
chr20	15128341	15134148	LTR7|HERVH-int|HERVH-int|HERVH-int|HERVH-int|HERVH-int|LTR7	-	LTR/ERV1	HERVH-int	6.34809	0.612795	10.3592	0.000147324	Yes	0	ENSG00000172264	MACROD2
chr1	248883347	248884525	L1M2b	+	LINE/L1	L1M2b	4.17732	0.435335	9.59565	0.00014757	Yes	18192	ENSG00000266949	LYPD8
chr4	21910863	21911275	L2a	+	LINE/L2	L2a	2.13391	0.395945	5.3894	0.000148051	Yes	0	ENSG00000185774	KCNIP4
chr19	38078276	38078733	MER106B	-	DNA/hAT-Charlie	MER106B	1.57071	12.3248	-7.84662	0.000148457	Yes	0	ENSG00000171817	ZNF540
chr17	19245038	19245419	L2	-	LINE/L2	L2	20.814	3.55714	5.85132	0.000149291	Yes	0	ENSG00000108641	B9D1
chr3	46405041	46407074	Tigger1	+	DNA/TcMar-Tigger	Tigger1	4.46395	0.56884	7.84747	0.000149517	Yes	2623	ENSG00000121807	CCR2
chr4	39454463	39454544	L2a	-	LINE/L2	L2a	12.2073	50.0525	-4.10022	0.000150281	Yes	1201	ENSG00000163682	RPL9
chr4	154558285	154558333	MER5B	+	DNA/hAT-Charlie	MER5B	2.04948	12.7626	-6.22723	0.000151601	Yes	423	ENSG00000121210	KIAA0922
chr5	140628973	140630094	MLT1E2-int	+	LTR/ERVL-MaLR	MLT1E2-int	15.5491	60.3194	-3.87929	0.000151856	Yes	1175	ENSG00000113248	PCDHB15
chr12	49578072	49578377	AluSz	+	SINE/Alu	AluSz	3.31339	15.2752	-4.61013	0.000151973	Yes	203	ENSG00000167552	TUBA1A
chr7	4939663	4939912	AluSx1	+	SINE/Alu	AluSx1	44.4059	8.21208	5.40739	0.000152611	Yes	5709	ENSG00000136297	MMD2
chr3	156140158	156142091	L2a	-	LINE/L2	L2a	6.27233	0.577834	10.8549	0.000152797	Yes	0	ENSG00000169282	KCNAB1
chr17	17401439	17401497	MER91A	+	DNA/hAT-Tip100	MER91A	15.7692	3.04287	5.18233	0.00015306	Yes	-1731	ENSG00000108551	RASD1
chr19	54944914	54945154	MIRb	+	SINE/MIR	MIRb	30.2079	5.69761	5.30185	0.000153248	Yes	0	ENSG00000167614	TTYH1
chr1	36792131	36792685	L2a	-	LINE/L2	L2a	26.0915	1.9987	13.0542	0.000153445	Yes	0	ENSG00000116883	RP11-268J15.5
chr9	2422224	2422333	MIR	-	SINE/MIR	MIR	1.55199	10.8888	-7.01599	0.000153445	Yes	-199502	ENSG00000147852	VLDLR
chr19	17709937	17710099	MER58A	+	DNA/hAT-Charlie	MER58A	4.51663	0.605735	7.45645	0.000153574	Yes	2039	ENSG00000130477	UNC13A
chr22	39643455	39643615	L2b	-	LINE/L2	L2b	18.9733	1.95395	9.71019	0.000153574	Yes	-2700	ENSG00000100311	PDGFB
chr10	71263104	71263365	MIR	-	SINE/MIR	MIR	4.31421	0.455773	9.46571	0.000153884	Yes	0	ENSG00000099282	TSPAN15
chr1	2119053	2119491	L1MC1	-	LINE/L1	L1MC1	7.83122	30.8677	-3.94162	0.000154181	Yes	0	ENSG00000162585	C1orf86
chrX	51362776	51364355	L1PB4	-	LINE/L1	L1PB4	0.925683	10.3386	-11.1686	0.000154515	Yes	-122127	ENSG00000189369	GSPT2
chr1	9988655	9988951	AluSq2	+	SINE/Alu	AluSq2	28.201	73.4534	-2.60464	0.000154639	Yes	0	ENSG00000162441	LZIC
chr8	142594389	142594690	MER4A	+	LTR/ERV1	MER4A	2.08906	0.394418	5.29656	0.000154639	Yes	65553	ENSG00000226490	AC138647.1
chr11	107836511	107836685	AluSx	-	SINE/Alu	AluSx	3.67919	21.2167	-5.76669	0.000155153	Yes	2304	ENSG00000179331	RAB39A
chr2	74665304	74666121	L2a	+	LINE/L2	L2a	3.76596	0.455124	8.27457	0.000155153	Yes	0	ENSG00000114993	RTKN
chr9	106903835	106904266	L1MEb	+	LINE/L1	L1MEb	3.38598	22.2376	-6.56755	0.000155153	Yes	138	ENSG00000136824	SMC2
chr2	181938911	181939193	LTR89	+	LTR/ERVL?	LTR89	2.18613	16.5137	-7.55386	0.00015545	Yes	0	ENSG00000170035	UBE2E3
chr8	42607461	42607756	AluJb	-	SINE/Alu	AluJb	2.00323	0.434268	4.6129	0.00015545	Yes	8	ENSG00000147434	CHRNA6
chr19	53858176	53858464	AluSq2	-	SINE/Alu	AluSq2	2.06068	13.1635	-6.38792	0.000155671	Yes	55	ENSG00000213799	ZNF845
chr17	16287874	16288264	MER21A	+	LTR/ERVL	MER21A	85.5233	31.9325	2.67825	0.000156046	Yes	1816	ENSG00000170315	UBB
chr17	75563690	75563979	L1MB5	+	LINE/L1	L1MB5	48.799	8.63472	5.65148	0.000156861	Yes	67013	ENSG00000184640	SEPT9
chr8	1413100	1414096	MER21B|MER21A	-	LTR/ERVL	MER21A	6.8312	0.774361	8.82171	0.000157056	Yes	-35437	ENSG00000198010	DLGAP2
chr10	3084750	3085175	L1ME1	+	LINE/L1	L1ME1	4.67861	0.529704	8.8325	0.000157128	Yes	-23351	ENSG00000067057	PFKP
chr9	108113533	108113843	AluSz6	+	SINE/Alu	AluSz6	8.12517	0.559814	14.5141	0.000157207	Yes	0	ENSG00000070214	SLC44A1
chr6	136660982	136661130	MIR	-	SINE/MIR	MIR	6.28871	0.713758	8.81071	0.000157878	Yes	2746	ENSG00000135525	MAP7
chr19	385095	387637	HERVK-int|LTR5_Hs	+	LTR/ERVK	HERVK-int	4.30547	0.540307	7.96857	0.000157991	Yes	-9083	ENSG00000105549	THEG
chr11	61286916	61287279	L1MD3	+	LINE/L1	L1MD3	3.70782	0.522341	7.09846	0.000159316	Yes	0	ENSG00000011347	SYT7
chr14	93928726	93929899	L2c	-	LINE/L2	L2c	22.7824	1.50677	15.12	0.00015957	Yes	0	ENSG00000133958	UNC79
chr2	206978004	206978575	MLT1F2	-	LTR/ERVL-MaLR	MLT1F2	29.8535	4.48276	6.65963	0.00015957	Yes	967	ENSG00000023228	NDUFS1
chr18	13003878	13005060	L2a	-	LINE/L2	L2a	8.48948	0.814485	10.4231	0.000160247	Yes	0	ENSG00000101639	CEP192
chr19	46605462	46612578	LTR7B|HERVH-int|HERVH-int|LTR7B	-	LTR/ERV1	HERVH-int	20.915	1.64527	12.7122	0.000160247	Yes	10751	ENSG00000188624	IGFL3
chr3	118613918	118614273	L1MD2	+	LINE/L1	L1MD2	26.7907	4.83587	5.54	0.000160247	Yes	5132	ENSG00000144847	IGSF11
chrX	115047427	115052815	L1MA1	-	LINE/L1	L1MA1	17.0749	1.49241	11.4411	0.000160394	Yes	-93759	ENSG00000228532	RP1-241P17.4
chr19	9836029	9841575	HERVE_a-int|LTR2	-	LTR/ERV1	HERVE_a-int	10.606	1.03721	10.2255	0.000160463	Yes	21095	ENSG00000196605	ZNF846
chr22	45661488	45661789	AluJb	+	SINE/Alu	AluJb	1.16788	7.74006	-6.62744	0.00016097	Yes	-19075	ENSG00000100373	UPK3A
chr19	40890931	40891568	L2a	+	LINE/L2	L2a	3.181	0.472441	6.73311	0.000161312	Yes	0	ENSG00000160396	HIPK4
chr22	24573081	24573181	MIR	+	SINE/MIR	MIR	6.86115	0.691222	9.92611	0.000162287	Yes	0	ENSG00000099991	CABIN1
chr1	223378364	223378714	MLT1A0	-	LTR/ERVL-MaLR	MLT1A0	26.5427	3.79054	7.00236	0.000163163	Yes	15448	ENSG00000143502	SUSD4
chr16	13054725	13055293	L2b	-	LINE/L2	L2b	1.87496	0.395874	4.73625	0.000163485	Yes	0	ENSG00000237515	SHISA9
chr16	57316136	57316409	AluJr	-	SINE/Alu	AluJr	3.51846	0.395309	8.90054	0.000163678	Yes	0	ENSG00000102934	PLLP
chr6	80236289	80239331	HERVP71A-int|LTR71A	+	LTR/ERV1	HERVP71A-int	31.1108	3.47873	8.94317	0.000164377	Yes	0	ENSG00000135338	LCA5
chr10	14040422	14041374	L2a	+	LINE/L2	L2a	12.1224	0.939611	12.9015	0.000164585	Yes	0	ENSG00000151474	FRMD4A
chr10	62116810	62117857	L2a	+	LINE/L2	L2a	8.69908	0.709513	12.2606	0.000165557	Yes	0	ENSG00000151150	ANK3
chr16	14422205	14422625	L1MC5	+	LINE/L1	L1MC5	23.8756	2.76885	8.62293	0.000165557	Yes	61576	ENSG00000186260	MKL2
chr5	149578130	149578374	LTR33	-	LTR/ERVL	LTR33	5.30579	0.529734	10.0159	0.000165557	Yes	0	ENSG00000011083	SLC6A7
chr19	44688907	44692477	L1MB2	-	LINE/L1	L1MB2	4.29727	28.3296	-6.59245	0.000165779	Yes	6374	ENSG00000167380	ZNF226
chr3	159429484	159430109	LTR67B|LTR67B	-	LTR/ERVL	LTR67B	8.27798	0.718386	11.523	0.000165922	Yes	0	ENSG00000250588	IQCJ-SCHIP1
chr10	112364598	112365032	L1MD3	-	LINE/L1	L1MD3	4.36587	18.4546	-4.22701	0.000166021	Yes	205	ENSG00000108055	SMC3
chr20	5978845	5979366	LTR67B|LTR67B	+	LTR/ERVL	LTR67B	4.86915	22.1214	-4.54317	0.000166021	Yes	2994	ENSG00000125885	MCM8
chr2	49454726	49458671	L1PA6	-	LINE/L1	L1PA6	138.42	18.5569	7.45926	0.000167309	Yes	-73051	ENSG00000170820	FSHR
chr11	132273436	132273524	L2c	-	LINE/L2	L2c	14.2075	1.80132	7.88725	0.000167694	Yes	11348	ENSG00000183715	OPCML
chr9	130172097	130172238	HAL1ME	-	LINE/L1	HAL1ME	14.6077	1.9879	7.34832	0.000168059	Yes	1395	ENSG00000136856	SLC2A8
chr4	109548114	109548405	AluSc8	+	SINE/Alu	AluSc8	6.91953	27.7429	-4.00936	0.000168071	Yes	0	ENSG00000109475	RPL34
chr5	109023959	109024598	LTR41	-	LTR/ERVL	LTR41	18.511	3.12263	5.92801	0.000168073	Yes	-470	ENSG00000112893	MAN2A1
chr17	57507238	57507504	AluSz	-	SINE/Alu	AluSz	17.5459	2.19606	7.98971	0.000168291	Yes	28149	ENSG00000175155	YPEL2
chr10	66700745	66701180	L1M5	+	LINE/L1	L1M5	1.90622	0.394454	4.83257	0.000169209	Yes	971097	ENSG00000183230	CTNNA3
chr12	113827500	113827810	AluSz	-	SINE/Alu	AluSz	139.357	29.3821	4.74293	0.000169303	Yes	298	ENSG00000151176	PLBD2
chr2	31496883	31497071	MamTip2b	-	DNA/hAT-Tip100	MamTip2b	18.2215	2.56595	7.10125	0.00016938	Yes	4571	ENSG00000013016	EHD3
chr8	102222203	102222948	L1MB7	+	LINE/L1	L1MB7	16.1395	3.32747	4.85037	0.00016965	Yes	-3783	ENSG00000120963	ZNF706
chr2	217610752	217616748	L1PB1	+	LINE/L1	L1PB1	3.44645	0.43767	7.87454	0.000169959	Yes	-50505	ENSG00000115461	IGFBP5
chr19	41052938	41054102	L1PA6	-	LINE/L1	L1PA6	3.66029	0.455534	8.03517	0.000170397	Yes	0	ENSG00000160460	SPTBN4
chr4	109547317	109547573	AluJb	-	SINE/Alu	AluJb	8.28913	27.0629	-3.26487	0.000170397	Yes	0	ENSG00000109475	RPL34
chr17	60528505	60528808	AluSp	-	SINE/Alu	AluSp	2.46282	12.3653	-5.02079	0.000170668	Yes	1052	ENSG00000087995	METTL2A
chr6	117070401	117070731	MLT2C1	+	LTR/ERVL	MLT2C1	13.3369	1.15419	11.5552	0.000170668	Yes	2633	ENSG00000183807	FAM162B
chr4	172907257	172911278	LTR7|HERVH-int|HERVH-int|HERVH-int|HERVH-int|HERVH-int|HERVH-int	-	LTR/ERV1	HERVH-int	10.544	1.02829	10.2538	0.000171017	Yes	0	ENSG00000174473	GALNTL6
chr10	5591525	5591945	MER57C2	-	LTR/ERV1	MER57C2	2.92827	0.395641	7.40132	0.000171303	Yes	23301	ENSG00000178363	CALML3
chr3	197757023	197757737	HAL1	-	LINE/L1	HAL1	3.87637	0.482445	8.03483	0.000171355	Yes	0	ENSG00000185621	LMLN
chr1	160088696	160089005	L1MC1	+	LINE/L1	L1MC1	3.80091	0.50229	7.56716	0.00017252	Yes	0	ENSG00000018625	ATP1A2
chr14	77426885	77427206	AluSz6	-	SINE/Alu	AluSz6	9.9107	1.1935	8.30388	0.00017252	Yes	63683	ENSG00000119669	IRF2BPL
chr2	2827471	2827875	L1PREC2	-	LINE/L1	L1PREC2	4.78897	0.569709	8.40599	0.000172718	Yes	364822	ENSG00000032389	TSSC1
chr10	80081961	80089071	L1MA4A	-	LINE/L1	L1MA4A	4.18519	0.555787	7.53022	0.000173685	Yes	265392	ENSG00000138326	RPS24
chr6	170125833	170126214	MER65A	+	LTR/ERV1	MER65A	9.07834	31.3885	-3.45752	0.000174901	Yes	-1683	ENSG00000130024	PHF10
chr14	50212469	50213239	L2c	-	LINE/L2	L2c	5.52197	0.650538	8.48832	0.000174978	Yes	0	ENSG00000197776	KLHDC1
chr6	46118390	46118725	AluSc	-	SINE/Alu	AluSc	14.1633	1.582	8.95277	0.000175036	Yes	3955	ENSG00000001561	ENPP4
chr14	69071952	69072271	LTR10E|LTR10E	-	LTR/ERV1	LTR10E	3.47534	0.528225	6.57928	0.000175327	Yes	0	ENSG00000182185	RAD51B
chr19	53859509	53859805	AluJr	+	SINE/Alu	AluJr	4.49648	16.5233	-3.67472	0.000175916	Yes	1388	ENSG00000213799	ZNF845
chr1	98506136	98506320	MIRc	-	SINE/MIR	MIRc	1.27586	9.83155	-7.70581	0.000176376	Yes	-119532	ENSG00000188641	DPYD
chr10	88804238	88804531	AluYm1	-	SINE/Alu	AluYm1	6.59485	0.650491	10.1383	0.000176376	Yes	5713	ENSG00000148672	GLUD1
chr11	67133260	67133817	L2	-	LINE/L2	L2	9.11356	0.977846	9.32004	0.000176376	Yes	0	ENSG00000175505	CLCF1
chr13	46692538	46694002	L1ME1	+	LINE/L1	L1ME1	59.3713	17.3042	3.43103	0.000176376	Yes	6054	ENSG00000136167	LCP1
chr14	50042857	50043120	AluJr	-	SINE/Alu	AluJr	1.82885	12.6953	-6.94167	0.000177102	Yes	271	ENSG00000213741	RPS29
chr19	21569994	21570291	AluSq2	-	SINE/Alu	AluSq2	3.36343	17.1459	-5.09775	0.000177111	Yes	7891	ENSG00000172687	ZNF738
chr8	40378160	40378672	L1MA6	-	LINE/L1	L1MA6	12.4922	1.37867	9.06104	0.000177143	Yes	9438	ENSG00000165061	ZMAT4
chr1	177169459	177169946	L2a	+	LINE/L2	L2a	3.48709	0.455427	7.65675	0.000177367	Yes	0	ENSG00000198797	BRINP2
chr2	207417820	207418172	AluSz	+	SINE/Alu	AluSz	16.4934	2.04916	8.04883	0.000178693	Yes	0	ENSG00000114948	ADAM23
chr7	4938637	4938928	MLT1A0	+	LTR/ERVL-MaLR	MLT1A0	163.135	30.929	5.27451	0.000179047	Yes	6693	ENSG00000136297	MMD2
chr4	84204519	84204762	L2d	+	LINE/L2	L2d	6.04795	29.5744	-4.88999	0.000179218	Yes	0	ENSG00000173085	COQ2
chr5	175136164	175136827	L2b	+	LINE/L2	L2b	115.93	32.0465	3.61756	0.000179781	Yes	22920	ENSG00000113749	HRH2
chr18	22084442	22084796	L2b	-	LINE/L2	L2b	2.90794	0.395872	7.34565	0.000179855	Yes	24522	ENSG00000134489	HRH4
chr13	24526309	24527299	LTR12D	-	LTR/ERV1	LTR12D	3.56795	0.436537	8.1733	0.000180283	Yes	-26541	ENSG00000273167	RP11-307N16.6
chr4	17485010	17485283	L2a	+	LINE/L2	L2a	45.5082	9.63214	4.72462	0.00018076	Yes	0	ENSG00000151552	QDPR
chr5	134737169	134738061	Charlie1a	-	DNA/hAT-Charlie	Charlie1a	10.1743	0.977	10.4139	0.000181327	Yes	-1566	ENSG00000113648	H2AFY
chr10	96363882	96364176	AluSz	-	SINE/Alu	AluSz	0.927568	9.35791	-10.0886	0.00018424	Yes	0	ENSG00000119969	HELLS
chr2	2680436	2683453	HERVL-int|MLT2A1	+	LTR/ERVL	HERVL-int	3.29737	0.484812	6.80135	0.00018424	Yes	-345405	ENSG00000186487	MYT1L
chr1	32140408	32140466	L2a	-	LINE/L2	L2a	7.02224	0.480566	14.6125	0.000184251	Yes	0	ENSG00000084636	COL16A1
chr4	21385289	21386030	L2a	+	LINE/L2	L2a	2.56797	0.395944	6.4857	0.000184782	Yes	0	ENSG00000185774	KCNIP4
chr1	26106500	26106746	MIRb	+	SINE/MIR	MIRb	3.26072	0.456513	7.14266	0.000184896	Yes	0	ENSG00000117643	MAN1C1
chr1	48655040	48657294	MER50-int|MER50-int|MER50|MER50	-	LTR/ERV1	MER50-int	1.90046	0.395914	4.80017	0.00018525	Yes	-31064	ENSG00000117834	SLC5A9
chr1	145016984	145017227	MIRc	-	SINE/MIR	MIRc	32.1506	7.11986	4.51562	0.00018525	Yes	0	ENSG00000178104	PDE4DIP
chr7	157382638	157382851	L3	-	LINE/CR1	L3	4.56004	21.5921	-4.73506	0.000185445	Yes	0	ENSG00000155093	PTPRN2
chr19	1587404	1587707	AluJr	-	SINE/Alu	AluJr	5.34278	22.1715	-4.1498	0.000186409	Yes	0	ENSG00000071655	MBD3
chr4	5901451	5901620	MER5B	-	DNA/hAT-Charlie	MER5B	23.6123	2.69693	8.75525	0.000186409	Yes	-6667	ENSG00000072832	CRMP1
chr19	28275166	28277611	L1MC2	+	LINE/L1	L1MC2	9.38535	35.5758	-3.79057	0.00018657	Yes	1420563	ENSG00000169021	UQCRFS1
chr1	233812466	233813305	MER4D1	-	LTR/ERV1	MER4D1	10.17	1.07908	9.42467	0.000186583	Yes	4209	ENSG00000135750	KCNK1
chr11	66054134	66054328	MIRb	+	SINE/MIR	MIRb	9.30426	36.4588	-3.91851	0.000186583	Yes	0	ENSG00000174851	YIF1A
chr18	72242126	72242225	AluSg4	+	SINE/Alu	AluSg4	2.5596	0.394565	6.48716	0.000186583	Yes	0	ENSG00000150656	CNDP1
chr12	70766476	70766886	L2c	-	LINE/L2	L2c	3.18947	0.503128	6.33927	0.000187325	Yes	0	ENSG00000135643	KCNMB4
chr12	121085998	121086219	L2b	+	LINE/L2	L2b	4.21068	0.526992	7.99001	0.000187751	Yes	0	ENSG00000157782	CABP1
chr1	108739005	108739137	MIRc	-	SINE/MIR	MIRc	2.50218	15.9162	-6.36092	0.000188154	Yes	0	ENSG00000085491	SLC25A24
chr5	140630223	140630778	MER66C	+	LTR/ERV1	MER66C	10.8947	36.2451	-3.32685	0.000188386	Yes	2425	ENSG00000113248	PCDHB15
chr16	14423561	14423888	AluJr	+	SINE/Alu	AluJr	10.526	0.965802	10.8988	0.00018867	Yes	62932	ENSG00000186260	MKL2
chr1	37269025	37269328	AluSc	-	SINE/Alu	AluSc	3.10737	13.5657	-4.36567	0.000189688	Yes	0	ENSG00000163873	GRIK3
chr13	110874839	110875148	AluY	+	SINE/Alu	AluY	6.06609	0.638266	9.50401	0.000189774	Yes	0	ENSG00000187498	COL4A1
chr7	96600612	96600734	MER5A	-	DNA/hAT-Charlie	MER5A	1.59646	22.2217	-13.9193	0.000189857	Yes	-34127	ENSG00000006377	DLX6
chr1	9987737	9988029	AluSx3	-	SINE/Alu	AluSx3	31.2729	79.4192	-2.53955	0.000189861	Yes	0	ENSG00000162441	LZIC
chr1	222729292	222729686	LTR64	-	LTR/ERV1	LTR64	11.0743	34.065	-3.07603	0.000190093	Yes	1559	ENSG00000143498	TAF1A
chr19	47939182	47939701	L2b	+	LINE/L2	L2b	5.39379	0.609791	8.8453	0.000190093	Yes	0	ENSG00000118160	SLC8A2
chr9	35863541	35863854	MLT1I|MLT1I	-	LTR/ERVL-MaLR	MLT1I	49.7685	14.3838	3.46003	0.000190442	Yes	5522	ENSG00000168828	OR13J1
chr17	11873703	11873998	AluSx1	-	SINE/Alu	AluSx1	2.16935	0.435831	4.9775	0.000191429	Yes	639	ENSG00000007174	DNAH9
chrX	115032766	115040555	LTR2|Harlequin-int|LTR2	-	LTR/ERV1	Harlequin-int	29.2876	2.05752	14.2344	0.000191497	Yes	-79098	ENSG00000228532	RP1-241P17.4
chr11	1359636	1359978	THE1D	+	LTR/ERVL-MaLR	THE1D	7.61473	0.890508	8.551	0.000192014	Yes	-28753	ENSG00000078902	TOLLIP
chr3	44157713	44158085	L2a	+	LINE/L2	L2a	12.794	1.17706	10.8694	0.000192014	Yes	-125294	ENSG00000173769	TOPAZ1
chr2	127789854	127791728	LTR37A|LTR37-int	+	LTR/ERV1	LTR37-int	41.0516	6.38039	6.43403	0.000192085	Yes	13876	ENSG00000136717	BIN1
chr13	111859525	111859814	AluJb	-	SINE/Alu	AluJb	4.31534	0.555216	7.77236	0.000192138	Yes	0	ENSG00000102606	ARHGEF7
chr15	30169422	30169723	AluJb	-	SINE/Alu	AluJb	2.95896	0.395853	7.4749	0.000192138	Yes	0	ENSG00000104067	TJP1
chr15	41874136	41874388	L1ME3A	-	LINE/L1	L1ME3A	17.5813	3.22808	5.44636	0.000192574	Yes	2601	ENSG00000092445	TYRO3
chr1	67865442	67865906	MER41B	+	LTR/ERV1	MER41B	8.76783	0.741756	11.8204	0.000193784	Yes	2860	ENSG00000081985	IL12RB2
chr20	61474942	61475759	L1MB4	-	LINE/L1	L1MB4	99.2018	29.6399	3.34689	0.000193784	Yes	0	ENSG00000101190	TCFL5
chr1	173767234	173767725	MLT1J	-	LTR/ERVL-MaLR	MLT1J	3.82809	22.4737	-5.87073	0.000194112	Yes	964	ENSG00000120334	CENPL
chr10	22932884	22933339	L2a	+	LINE/L2	L2a	2.61106	0.437593	5.96687	0.00019424	Yes	0	ENSG00000150867	PIP4K2A
chr14	90739929	90740427	MLT1E2	-	LTR/ERVL-MaLR	MLT1E2	5.50934	24.9372	-4.52634	0.00019424	Yes	962	ENSG00000100764	PSMC1
chr7	1475744	1476039	AluSq	+	SINE/Alu	AluSq	14.1954	0.922504	15.3879	0.000194433	Yes	0	ENSG00000164877	MICALL2
chr20	58257476	58258438	L2a	-	LINE/L2	L2a	6.70137	0.552518	12.1288	0.000195305	Yes	0	ENSG00000087495	PHACTR3
chr17	58742666	58742868	AluSc	-	SINE/Alu	AluSc	6.16142	24.3389	-3.9502	0.000195394	Yes	818	ENSG00000170836	PPM1D
chr10	132089073	132096053	MER9a3|HERVK9-int|MER9a3	+	LTR/ERVK	HERVK9-int	2.45749	0.438871	5.59957	0.000196473	Yes	106289	ENSG00000108010	GLRX3
chr8	143639227	143640543	Tigger3b	-	DNA/TcMar-Tigger	Tigger3b	3.12126	0.456439	6.83827	0.000196734	Yes	12858	ENSG00000181790	BAI1
[truncated: 19,093 more rows]

## Sheet: cpm_Hippocampus.xls
chr	start	end	repName	strand	class.fam	unMerged	mean.A	mean.EP	foldChange	padj	diffExpr	dist2gene	gene.ens	gene.name
chr1	1365248	1365537	AluJb	-	SINE/Alu	AluJb	356.214	0.789504	451.187	9.31081e-15	Yes	2082	ENSG00000205116	TMEM88B
chr1	1364747	1365048	L1MEd	-	LINE/L1	L1MEd	357.723	0.9232	387.482	2.87176e-13	Yes	1581	ENSG00000205116	TMEM88B
chr1	1364400	1364578	AluSq2	+	SINE/Alu	AluSq2	101.84	0.418714	243.22	2.87694e-13	Yes	1234	ENSG00000205116	TMEM88B
chr1	1364099	1364399	AluYk2	+	SINE/Alu	AluYk2	240.325	0.616288	389.955	3.03881e-13	Yes	933	ENSG00000205116	TMEM88B
chr11	63339842	63340185	MSTC	+	LTR/ERVL-MaLR	MSTC	169.325	1.60959	105.198	7.38033e-13	Yes	483	ENSG00000176485	PLA2G16
chr9	38407647	38407874	MIRc	+	SINE/MIR	MIRc	22.0014	1135.31	-51.6016	2.02633e-12	Yes	1118	ENSG00000137142	IGFBPL1
chr1	1364582	1364740	AluSx4	+	SINE/Alu	AluSx4	113.154	0.547393	206.715	4.43096e-12	Yes	1416	ENSG00000205116	TMEM88B
chr9	38407283	38407429	MIR3	-	SINE/MIR	MIR3	20.9562	887.762	-42.3627	5.34094e-12	Yes	1563	ENSG00000137142	IGFBPL1
chr11	63337397	63337863	L1ME3F	-	LINE/L1	L1ME3F	331.058	3.24925	101.888	5.49681e-12	Yes	2805	ENSG00000176485	PLA2G16
chrY	21153222	21153521	AluSx1	+	SINE/Alu	AluSx1	150.275	2383.7	-15.8622	5.62024e-12	Yes	-162675	ENSG00000169953	HSFY2
chr18	48322029	48322332	AluSx1	+	SINE/Alu	AluSx1	135.389	0.971851	139.311	1.38e-11	Yes	2243	ENSG00000134042	MRO
chr19	40885810	40885973	AluJr	-	SINE/Alu	AluJr	90.0324	0.562486	160.062	2.23316e-11	Yes	0	ENSG00000105223	PLD3
chr11	63337106	63337387	MER58B	+	DNA/hAT-Charlie	MER58B	146.843	2.00223	73.3398	4.92475e-11	Yes	3281	ENSG00000176485	PLA2G16
chr18	48321705	48321761	L1ME4a	-	LINE/L1	L1ME4a	63.1379	0.589503	107.104	7.94095e-11	Yes	2814	ENSG00000134042	MRO
chr9	38408687	38408832	MIR3	-	SINE/MIR	MIR3	19.6967	868.2	-44.0785	7.94095e-11	Yes	160	ENSG00000137142	IGFBPL1
chr11	63338941	63339245	AluSx	+	SINE/Alu	AluSx	98.1422	1.80306	54.4309	9.50723e-11	Yes	1423	ENSG00000176485	PLA2G16
chr3	42736565	42738304	L2	+	LINE/L2	L2	212.418	0.798875	265.896	1.14749e-10	Yes	0	ENSG00000010282	HHATL
chr9	38408129	38408448	AluJb	+	SINE/Alu	AluJb	8.96653	789.758	-88.0785	1.16491e-10	Yes	544	ENSG00000137142	IGFBPL1
chr11	63337853	63338305	L1ME3F	-	LINE/L1	L1ME3F	151.097	2.15739	70.0369	1.25309e-10	Yes	2363	ENSG00000176485	PLA2G16
chr8	20986274	20986785	L2a	+	LINE/L2	L2a	33.2159	0.421859	78.737	1.4654e-10	Yes	561131	ENSG00000168546	GFRA2
chr11	67190516	67190760	L2c	+	LINE/L2	L2c	137.886	0.560083	246.188	2.12846e-10	Yes	0	ENSG00000172508	CARNS1
chr7	124382092	124382785	L1ME1	+	LINE/L1	L1ME1	52.2101	0.634881	82.236	2.12846e-10	Yes	3267	ENSG00000170775	GPR37
chr9	95567865	95568076	MIR	-	SINE/MIR	MIR	60.5722	0.592961	102.152	2.55039e-10	Yes	39799	ENSG00000127081	ZNF484
chr2	11262258	11262790	MER41A	-	LTR/ERV1	MER41A	36.0314	0.504337	71.4431	2.94396e-10	Yes	-10390	ENSG00000150873	C2orf50
chr3	39562437	39562741	AluSz6	-	SINE/Alu	AluSz6	26.49	0.420757	62.9579	4.51641e-10	Yes	0	ENSG00000168314	MOBP
chr1	31652212	31652484	AluSx	-	SINE/Alu	AluSx	16.3263	211.763	-12.9706	6.08532e-10	Yes	109	ENSG00000084628	NKAIN1
chr11	63334576	63335268	LTR43	+	LTR/ERV1	LTR43	67.175	1.19216	56.3476	6.08532e-10	Yes	-3722	ENSG00000133328	HRASLS2
chr20	1920997	1921161	MIRb	+	SINE/MIR	MIRb	67.6471	2.49854	27.0747	6.08532e-10	Yes	455	ENSG00000198053	SIRPA
chr5	111059881	111062348	Charlie2a	-	DNA/hAT-Charlie	Charlie2a	12.7895	226.996	-17.7486	6.08532e-10	Yes	0	ENSG00000134986	NREP
chr1	35326972	35327544	LTR48B	-	LTR/ERV1	LTR48B	577.566	22.0483	26.1955	7.97066e-10	Yes	-1556	ENSG00000163866	SMIM12
chr11	67189953	67190097	AluJr	-	SINE/Alu	AluJr	23.006	0.421962	54.5215	7.97066e-10	Yes	0	ENSG00000172508	CARNS1
chr15	91855089	91856933	L1M4b	+	LINE/L1	L1M4b	39.7625	0.591572	67.215	7.97066e-10	Yes	10551	ENSG00000185518	SV2B
chr5	63909403	63910170	L1ME4a	+	LINE/L1	L1ME4a	526.685	42.1655	12.4909	1.00418e-09	Yes	1265	ENSG00000186479	RGS7BP
chr18	48323397	48323882	MLT1G1	-	LTR/ERVL-MaLR	MLT1G1	153.219	1.87047	81.9145	1.60796e-09	Yes	693	ENSG00000134042	MRO
chr19	35806874	35807355	MER1A	+	DNA/hAT-Charlie	MER1A	25.6405	0.420318	61.0027	1.66556e-09	Yes	2168	ENSG00000105695	MAG
chr1	35327897	35328126	MIR	+	SINE/MIR	MIR	149.619	8.41063	17.7893	1.75022e-09	Yes	-2481	ENSG00000163866	SMIM12
chr19	23285288	23285597	AluSz	-	SINE/Alu	AluSz	1.0052	28.0921	-27.9467	1.92816e-09	Yes	0	ENSG00000183850	ZNF730
chr18	48323179	48323281	L2a	-	LINE/L2	L2a	40.5665	0.740949	54.7493	1.9442e-09	Yes	1294	ENSG00000134042	MRO
chr6	29636703	29636997	AluSq2	-	SINE/Alu	AluSq2	20.4135	0.42606	47.9122	1.99637e-09	Yes	0	ENSG00000204655	MOG
chr3	81868989	81870187	MSTB|MSTB-int|MSTB	-	LTR/ERVL-MaLR	MSTB-int	37.003	0.419321	88.2449	2.03012e-09	Yes	-57678	ENSG00000114480	GBE1
chr21	22113350	22113676	L1M6	-	LINE/L1	L1M6	21.3984	0.422371	50.6625	2.22717e-09	Yes	-256958	ENSG00000154654	NCAM2
chr6	166718939	166719141	Charlie30a	-	DNA/hAT-Charlie	Charlie30a	83.0283	2.61609	31.7376	2.2512e-09	Yes	28	ENSG00000176381	PRR18
chr11	63338394	63338861	L1ME3F	-	LINE/L1	L1ME3F	150.688	2.11008	71.4135	3.16403e-09	Yes	1807	ENSG00000176485	PLA2G16
chr5	125833780	125834229	L1ME1	-	LINE/L1	L1ME1	71.5535	2.67202	26.7788	3.16403e-09	Yes	1595	ENSG00000155324	GRAMD3
chr8	111958204	111962717	MER57-int|MER57-int|MER57-int	-	LTR/ERV1	MER57-int	23.9463	0.424727	56.3805	3.21742e-09	Yes	-970129	ENSG00000164794	KCNV1
chr16	88128723	88128828	L1MB8	+	LINE/L1	L1MB8	14.7114	0.428306	34.3478	3.31961e-09	Yes	17800	ENSG00000172530	BANP
chr6	29637062	29637367	AluSq2	-	SINE/Alu	AluSq2	15.6283	0.428266	36.4921	3.58675e-09	Yes	0	ENSG00000204655	MOG
chrX	120149554	120150575	L1ME2	+	LINE/L1	L1ME2	24.8807	0.502222	49.5413	3.63083e-09	Yes	-29913	ENSG00000236371	CT47A1
chr16	88128392	88128658	AluJr	+	SINE/Alu	AluJr	34.1683	0.56003	61.0114	3.77404e-09	Yes	17469	ENSG00000172530	BANP
chr20	1920757	1920943	MIRb	+	SINE/MIR	MIRb	65.4752	5.19195	12.6109	3.77404e-09	Yes	215	ENSG00000198053	SIRPA
chr6	149565703	149566031	AluSz	+	SINE/Alu	AluSz	82.7377	0.85055	97.2755	4.63948e-09	Yes	0	ENSG00000055208	TAB2
chr2	39829037	39830052	L1ME2z	-	LINE/L1	L1ME2z	135.801	11.8691	11.4416	4.93425e-09	Yes	-62071	ENSG00000152154	TMEM178A
chr11	67189195	67189365	AluJr	-	SINE/Alu	AluJr	32.9879	0.493595	66.8319	5.78765e-09	Yes	0	ENSG00000172508	CARNS1
chr10	81907566	81908834	L1M1	+	LINE/L1	L1M1	69.1336	1.07058	64.5759	6.81531e-09	Yes	1812	ENSG00000122359	ANXA11
chr2	200522956	200523524	L1ME1	+	LINE/L1	L1ME1	18.6159	0.41997	44.3268	6.81531e-09	Yes	101744	ENSG00000226124	FTCDNL1
chr6	149566070	149566254	MIR	-	SINE/MIR	MIR	88.2535	0.866625	101.836	6.81531e-09	Yes	0	ENSG00000055208	TAB2
chr9	114313982	114316040	Charlie5	-	DNA/hAT-Charlie	Charlie5	1775.21	155.661	11.4044	8.23215e-09	Yes	0	ENSG00000173258	ZNF483
chr6	29637572	29637844	AluSg	-	SINE/Alu	AluSg	25.5726	0.464682	55.0325	8.9447e-09	Yes	0	ENSG00000204655	MOG
chr7	124382812	124383319	L2a	+	LINE/L2	L2a	48.296	0.854391	56.5268	9.51808e-09	Yes	2733	ENSG00000170775	GPR37
chr9	139660751	139661748	LTR13	+	LTR/ERVK	LTR13	17.3055	0.466186	37.1213	9.51808e-09	Yes	-45	ENSG00000177984	LCN15
chr19	55792583	55793017	MLT1D	-	LTR/ERVL-MaLR	MLT1D	19.3578	0.424233	45.6301	1.04648e-08	Yes	-424	ENSG00000160469	BRSK1
chr11	63340505	63340638	FLAM_C	-	SINE/Alu	FLAM_C	37.4965	0.782508	47.9183	1.14535e-08	Yes	30	ENSG00000176485	PLA2G16
chr10	46972384	46972918	LTR6A	+	LTR/ERV1	LTR6A	437.912	26.6046	16.46	1.2299e-08	Yes	-985	ENSG00000204176	SYT15
chr20	42215063	42215299	MIR	-	SINE/MIR	MIR	40.2337	0.759177	52.9965	1.28964e-08	Yes	0	ENSG00000101049	SGK2
chr18	51728435	51728715	AluSx1	+	SINE/Alu	AluSx1	0.533042	24.177	-45.3567	1.34978e-08	Yes	0	ENSG00000134046	MBD2
chr16	57915782	57916221	L1ME4b	+	LINE/L1	L1ME4b	61.3927	1.17727	52.1481	1.39947e-08	Yes	1283	ENSG00000070729	CNGB1
chr9	95569182	95569421	L1MC	+	LINE/L1	L1MC	29.944	0.583011	51.361	1.39947e-08	Yes	38454	ENSG00000127081	ZNF484
chr18	74701344	74701609	L1MC1	-	LINE/L1	L1MC1	20.0766	0.423952	47.3559	1.48746e-08	Yes	0	ENSG00000197971	MBP
chr11	63340323	63340429	AluSg7	-	SINE/Alu	AluSg7	22.1672	0.509573	43.5015	1.55592e-08	Yes	239	ENSG00000176485	PLA2G16
chr11	67189366	67189642	AluY	-	SINE/Alu	AluY	23.2864	0.529658	43.9649	1.55592e-08	Yes	0	ENSG00000172508	CARNS1
chr19	10405461	10405752	AluSx1	+	SINE/Alu	AluSx1	17.1718	0.507082	33.864	1.55592e-08	Yes	0	ENSG00000105376	ICAM5
chr4	108830256	108830566	AluSx	-	SINE/Alu	AluSx	27.8326	0.614964	45.2589	1.55816e-08	Yes	0	ENSG00000164023	SGMS2
chr18	51727951	51728248	AluY	+	SINE/Alu	AluY	0.534856	18.1693	-33.9705	1.58715e-08	Yes	0	ENSG00000134046	MBD2
chr9	138597918	138598038	MIRb	+	SINE/MIR	MIRb	16.4507	0.425275	38.6825	1.61537e-08	Yes	0	ENSG00000107147	KCNT1
chr6	29636524	29636702	Charlie4a	-	DNA/hAT-Charlie	Charlie4a	18.324	0.426721	42.9414	1.70088e-08	Yes	0	ENSG00000204655	MOG
chr14	101396853	101397066	MER20	-	DNA/hAT-Charlie	MER20	134.887	3.94668	34.1774	1.71956e-08	Yes	36208	ENSG00000269375	AL117190.3
chr20	42215586	42215887	AluSp	-	SINE/Alu	AluSp	32.8432	0.782042	41.9967	1.71956e-08	Yes	0	ENSG00000101049	SGK2
chr5	173956069	173956525	MLT2D	-	LTR/ERVL	MLT2D	20.4869	0.555991	36.8475	1.74204e-08	Yes	-195012	ENSG00000120149	MSX2
chr1	168050099	168050400	AluSp	-	SINE/Alu	AluSp	5.3806	104.159	-19.3582	1.78185e-08	Yes	3598	ENSG00000143147	GPR161
chr6	149565384	149565680	L2b	-	LINE/L2	L2b	94.7481	1.15188	82.2551	1.7997e-08	Yes	0	ENSG00000055208	TAB2
chr10	88800116	88800572	LTR2	-	LTR/ERV1	LTR2	78.281	2.80627	27.8951	1.84518e-08	Yes	9672	ENSG00000148672	GLUD1
chr10	46972107	46972383	MLT1D	-	LTR/ERVL-MaLR	MLT1D	311.7	22.7841	13.6806	1.92523e-08	Yes	-708	ENSG00000204176	SYT15
chr18	48322685	48322785	L2d2	-	LINE/L2	L2d2	32.3973	0.796348	40.6823	1.92523e-08	Yes	1790	ENSG00000134042	MRO
chr6	163602839	163603170	AmnSINE1	+	SINE/5S-Deu-L2	AmnSINE1	16.5207	0.506845	32.5952	1.94225e-08	Yes	0	ENSG00000112530	PACRG
chr6	29636172	29636289	L2a	+	LINE/L2	L2a	24.8531	0.423749	58.6505	2.06568e-08	Yes	0	ENSG00000204655	MOG
chr1	35328305	35328387	L2c	+	LINE/L2	L2c	151.269	11.3407	13.3386	2.19628e-08	Yes	2651	ENSG00000116544	DLGAP3
chr9	97910057	97911521	Charlie1	+	DNA/hAT-Charlie	Charlie1	67.2145	2.23025	30.1376	2.19628e-08	Yes	0	ENSG00000158169	FANCC
chr7	94665621	94666103	LTR67B	-	LTR/ERVL	LTR67B	14.0676	0.463813	30.3304	2.23748e-08	Yes	0	ENSG00000158528	PPP1R9A
chr6	34503647	34503736	MIR3	+	SINE/MIR	MIR3	15.239	0.507623	30.0203	2.35055e-08	Yes	642	ENSG00000124507	PACSIN1
chr10	128350219	128351170	L1MB4	-	LINE/L1	L1MB4	12.0312	0.42424	28.3595	2.37177e-08	Yes	0	ENSG00000154493	C10orf90
chr16	5062919	5063223	THE1D	-	LTR/ERVL-MaLR	THE1D	11.5341	0.468324	24.6286	2.47384e-08	Yes	0	ENSG00000103184	SEC14L5
chr10	6866141	6875603	LTR5_Hs|HERVK-int|LTR5_Hs	-	LTR/ERVK	HERVK-int	22.9874	0.601501	38.2167	2.55833e-08	Yes	-243879	ENSG00000065675	PRKCQ
chr18	74704104	74704439	MER1B	-	DNA/hAT-Charlie	MER1B	13.8039	0.425409	32.4486	2.57199e-08	Yes	0	ENSG00000197971	MBP
chr19	35804923	35805117	MER102c	+	DNA/hAT-Charlie	MER102c	18.9918	0.463359	40.9872	2.57199e-08	Yes	217	ENSG00000105695	MAG
chr8	25368352	25369710	L1ME1	-	LINE/L1	L1ME1	0.632142	26.3778	-41.7276	2.67752e-08	Yes	2917	ENSG00000184661	CDCA2
chr11	1285961	1287473	THE1A|THE1A-int	-	LTR/ERVL-MaLR	THE1A-int	167.314	15.49	10.8014	3.09259e-08	Yes	2556	ENSG00000117983	MUC5B
chr17	76231982	76232176	MSTA	-	LTR/ERVL-MaLR	MSTA	16.0574	0.424207	37.8527	3.09259e-08	Yes	0	ENSG00000204278	TMEM235
chr9	99976776	99982296	LTR7|HERVH-int|HERVH-int|HERVH-int|HERVH-int|HERVH-int|HERVH-int|HERVH-int|LTR7	+	LTR/ERV1	HERVH-int	13.6667	0.508314	26.8862	3.10311e-08	Yes	-18470	ENSG00000197816	CCDC180
chr19	2287741	2287852	MIRb	-	SINE/MIR	MIRb	26.7265	0.939197	28.4568	3.14931e-08	Yes	1923	ENSG00000220008	LINGO3
chr18	72254544	72255265	L2b	+	LINE/L2	L2b	27.1141	0.612287	44.2833	3.15888e-08	Yes	97	ENSG00000150656	CNDP1
chr6	157625233	157625614	L1MB8	+	LINE/L1	L1MB8	14.4465	0.462787	31.2164	3.21536e-08	Yes	84805	ENSG00000215712	TMEM242
chr1	35327636	35327896	L2c	-	LINE/L2	L2c	259.286	12.1788	21.2899	3.62334e-08	Yes	-2220	ENSG00000163866	SMIM12
chr4	108830669	108830785	L2b	+	LINE/L2	L2b	30.4569	0.750308	40.5925	3.71454e-08	Yes	0	ENSG00000164023	SGMS2
chr4	15669399	15669680	AluSp	+	SINE/Alu	AluSp	1.23272	37.4341	-30.367	3.88297e-08	Yes	0	ENSG00000118564	FBXL5
chr1	49323407	49324534	L1MB7	+	LINE/L1	L1MB7	22.841	0.691099	33.0503	3.92582e-08	Yes	0	ENSG00000186094	AGBL4
chr1	205486570	205487518	L2a	+	LINE/L2	L2a	19.0129	0.511154	37.1961	3.99646e-08	Yes	0	ENSG00000117266	CDK18
chr2	42662465	42663546	L1MB7	+	LINE/L1	L1MB7	18.4024	0.490939	37.484	3.99646e-08	Yes	5612	ENSG00000171126	KCNG3
chr20	1787031	1787554	MLT1H1	-	LTR/ERVL-MaLR	MLT1H1	46.7873	1.91607	24.4184	3.99646e-08	Yes	-87601	ENSG00000198053	SIRPA
chr1	35328467	35328686	L2c	+	LINE/L2	L2c	178.344	10.0444	17.7556	4.16351e-08	Yes	2352	ENSG00000116544	DLGAP3
chr11	67185581	67185700	MIR3	-	SINE/MIR	MIR3	16.7051	0.465642	35.8755	4.20601e-08	Yes	0	ENSG00000172531	PPP1CA
chr1	112259443	112260484	L2a	-	LINE/L2	L2a	48.5503	1.54223	31.4805	4.41803e-08	Yes	0	ENSG00000197852	FAM212B
chr19	35799025	35799346	L2a	-	LINE/L2	L2a	9.05985	0.428081	21.1638	4.48782e-08	Yes	0	ENSG00000105695	MAG
chr2	97574910	97576534	L3	-	LINE/CR1	L3	40.4024	0.744909	54.2381	4.51484e-08	Yes	0	ENSG00000168754	FAM178B
chr11	67190098	67190142	MIRb	-	SINE/MIR	MIRb	22.9405	0.509108	45.0601	4.97201e-08	Yes	0	ENSG00000172508	CARNS1
chr18	21848532	21849330	L2	+	LINE/L2	L2	25.7932	0.724827	35.5854	4.97201e-08	Yes	0	ENSG00000141447	OSBPL1A
chr5	148361749	148362308	L1ME4b	+	LINE/L1	L1ME4b	11.2287	0.465883	24.1019	4.97201e-08	Yes	0	ENSG00000169247	SH3TC2
chr17	42395269	42395334	L2b	+	LINE/L2	L2b	149.041	12.0551	12.3633	5.11766e-08	Yes	0	ENSG00000108309	RUNDC3A
chr16	27686749	27687848	MLT1D-int	-	LTR/ERVL-MaLR	MLT1D-int	14.7186	0.483319	30.4532	5.51389e-08	Yes	0	ENSG00000047578	KIAA0556
chr16	27681338	27681945	HAL1b	-	LINE/L1	HAL1b	14.5564	0.485073	30.0086	5.52789e-08	Yes	0	ENSG00000047578	KIAA0556
chr17	9796541	9797523	L1MB3	-	LINE/L1	L1MB3	7.72273	0.428195	18.0356	5.52789e-08	Yes	1123	ENSG00000065325	GLP2R
chr5	111062655	111062800	MER102c	-	DNA/hAT-Charlie	MER102c	1.50841	32.7038	-21.681	5.52789e-08	Yes	0	ENSG00000134986	NREP
chr6	29637368	29637505	Charlie4a	-	DNA/hAT-Charlie	Charlie4a	12.1643	0.42828	28.4027	5.52789e-08	Yes	0	ENSG00000204655	MOG
chr17	72871976	72872217	LTR33	-	LTR/ERVL	LTR33	29.1247	0.635618	45.8211	6.41259e-08	Yes	1212	ENSG00000172782	FADS6
chr6	6345171	6345465	L1ME3G	-	LINE/L1	L1ME3G	12.6183	0.467314	27.0018	6.4504e-08	Yes	-23926	ENSG00000124491	F13A1
chrX	139863887	139864100	MER58A	+	DNA/hAT-Charlie	MER58A	19.0438	0.527943	36.0717	6.4504e-08	Yes	1326	ENSG00000184258	CDR1
chr12	132908466	132908593	MIR	-	SINE/MIR	MIR	35.3358	0.881421	40.0897	6.73507e-08	Yes	-2532	ENSG00000182870	GALNT9
chr5	150651655	150652324	L1MC4a	+	LINE/L1	L1MC4a	324.95	40.522	8.0191	6.89567e-08	Yes	1655	ENSG00000196743	GM2A
chr1	11700852	11701058	MIRb	+	SINE/MIR	MIRb	18.2894	0.551072	33.1889	7.16958e-08	Yes	7367	ENSG00000116661	FBXO2
chr4	108826248	108826602	THE1B	-	LTR/ERVL-MaLR	THE1B	7.63181	0.427773	17.8408	7.69839e-08	Yes	0	ENSG00000164023	SGMS2
chr19	34875963	34876284	AluSq	+	SINE/Alu	AluSq	10.9958	0.483813	22.7275	7.90535e-08	Yes	0	ENSG00000105220	GPI
chr11	93917413	93917547	L2a	+	LINE/L2	L2a	25.6987	190.384	-7.40829	8.11951e-08	Yes	2276	ENSG00000110218	PANX1
chr19	55793814	55794063	L2a	+	LINE/L2	L2a	8.48701	0.42827	19.817	8.17987e-08	Yes	0	ENSG00000160469	BRSK1
chr1	168052197	168052312	L2c	+	LINE/L2	L2c	3.82737	67.9835	-17.7624	8.29297e-08	Yes	1686	ENSG00000143147	GPR161
chr20	1868248	1869047	L2a	-	LINE/L2	L2a	24.8928	0.842332	29.5522	8.29297e-08	Yes	-6108	ENSG00000198053	SIRPA
chr3	39547858	39548314	LTR16C	-	LTR/ERVL	LTR16C	11.1087	0.426374	26.054	8.46731e-08	Yes	0	ENSG00000168314	MOBP
chr11	73367079	73367480	L2b	+	LINE/L2	L2b	9.25645	0.428273	21.6134	9.52479e-08	Yes	0	ENSG00000021300	PLEKHB1
chr13	114797405	114798007	LTR39	+	LTR/ERV1	LTR39	13.3392	0.464693	28.7054	9.63402e-08	Yes	0	ENSG00000185989	RASA3
chr11	10593389	10593933	MLT1E2-int	-	LTR/ERVL-MaLR	MLT1E2-int	23.3034	0.92914	25.0806	9.74926e-08	Yes	0	ENSG00000133800	LYVE1
chr16	83768693	83769019	Tigger18a	-	DNA/TcMar-Tigger	Tigger18a	8.95271	0.428254	20.9051	9.74926e-08	Yes	0	ENSG00000140945	CDH13
chr16	88127368	88127479	L1MC4	-	LINE/L1	L1MC4	10.8871	0.467355	23.2952	9.74926e-08	Yes	16445	ENSG00000172530	BANP
chr18	15183879	15184183	AluSg	-	SINE/Alu	AluSg	11.8431	0.466147	25.4065	9.74926e-08	Yes	331143	ENSG00000180777	ANKRD30B
chr2	86148640	86149262	MER61F	+	LTR/ERV1	MER61F	10.4906	0.424597	24.7071	9.74926e-08	Yes	-32504	ENSG00000115525	ST3GAL5
chr21	15227394	15229839	MSTA-int|MSTA|MSTA-int|MSTA|MSTA|MSTA-int|MSTA-int	-	LTR/ERVL-MaLR	MSTA-int	8.23723	0.427628	19.2626	9.74926e-08	Yes	-173936	ENSG00000269011	AL050303.1
chr5	148373454	148373633	MIR	-	SINE/MIR	MIR	13.3267	0.556626	23.942	9.74926e-08	Yes	0	ENSG00000169247	SH3TC2
chr7	145694469	145694607	LFSINE_Vert	-	SINE/tRNA	LFSINE_Vert	19.9965	0.557958	35.8388	9.74926e-08	Yes	-118847	ENSG00000174469	CNTNAP2
chr3	120892313	120893357	Tigger2b_Pri	-	DNA/TcMar-Tigger	Tigger2b_Pri	25.6604	0.620101	41.381	1.02578e-07	Yes	0	ENSG00000145087	STXBP5L
chr5	111063436	111063779	MLT1F1	+	LTR/ERVL-MaLR	MLT1F1	1.31248	27.8372	-21.2096	1.02578e-07	Yes	0	ENSG00000134986	NREP
chr18	51727603	51727707	L2	+	LINE/L2	L2	0.533754	18.7768	-35.1787	1.02599e-07	Yes	0	ENSG00000134046	MBD2
chr1	31833015	31833307	AluSp	-	SINE/Alu	AluSp	34.3167	1.27164	26.9862	1.05044e-07	Yes	0	ENSG00000121766	ZCCHC17
chr18	72256353	72256578	Charlie8	+	DNA/hAT-Charlie	Charlie8	19.5167	0.638079	30.5867	1.06704e-07	Yes	1906	ENSG00000150656	CNDP1
chr10	128348672	128349320	MLT1E1A	+	LTR/ERVL-MaLR	MLT1E1A	9.22627	0.468838	19.679	1.08215e-07	Yes	0	ENSG00000154493	C10orf90
chr1	46693199	46693605	L1MC5a	-	LINE/L1	L1MC5a	20.3739	0.767829	26.5345	1.08893e-07	Yes	6267	ENSG00000171357	LURAP1
chr1	168050715	168050964	MIR	-	SINE/MIR	MIR	13.7395	104.267	-7.58885	1.09065e-07	Yes	3034	ENSG00000143147	GPR161
chr1	35328687	35329007	MSTD	+	LTR/ERVL-MaLR	MSTD	142.358	9.12954	15.5931	1.11769e-07	Yes	2031	ENSG00000116544	DLGAP3
chr8	53309036	53309400	THE1C	-	LTR/ERVL-MaLR	THE1C	8.20626	0.428309	19.1597	1.11951e-07	Yes	0	ENSG00000147488	ST18
chr10	81908835	81909637	L1MB5	-	LINE/L1	L1MB5	21.6669	0.689612	31.4189	1.12134e-07	Yes	1009	ENSG00000122359	ANXA11
chr11	10592798	10593388	L1MA5A	-	LINE/L1	L1MA5A	29.4046	0.792227	37.1164	1.12134e-07	Yes	0	ENSG00000133800	LYVE1
chr16	88111730	88111886	L1MEd	+	LINE/L1	L1MEd	16.3522	0.462232	35.3767	1.12134e-07	Yes	807	ENSG00000172530	BANP
chr1	205427219	205427635	L2b	-	LINE/L2	L2b	1.08189	20.4351	-18.8883	1.1511e-07	Yes	-2138	ENSG00000186007	LEMD1
chr13	44669115	44669706	MER50B|MER50B	-	LTR/ERV1	MER50B	6.4259	0.428263	15.0046	1.1511e-07	Yes	47974	ENSG00000139656	SMIM2
chr4	87843573	87844102	LTR41C	+	LTR/ERVL	LTR41C	38.5047	1.50533	25.5789	1.21646e-07	Yes	0	ENSG00000163633	C4orf36
chr1	40117890	40118180	MER102b	+	DNA/hAT-Charlie	MER102b	20.9983	0.756414	27.7603	1.24386e-07	Yes	6614	ENSG00000116981	NT5C1A
chr10	98114571	98114883	AluSx	+	SINE/Alu	AluSx	9.40426	0.428287	21.9578	1.24386e-07	Yes	0	ENSG00000197430	OPALIN
chr3	197757023	197757737	HAL1	-	LINE/L1	HAL1	6.21565	0.42658	14.5709	1.28265e-07	Yes	0	ENSG00000185621	LMLN
chr9	87985072	87990640	MLT2A2|HERVL-int	-	LTR/ERVL	HERVL-int	18.2138	0.553293	32.919	1.28265e-07	Yes	170816	ENSG00000135049	AGTPBP1
chr9	124063623	124063933	AluSx	+	SINE/Alu	AluSx	15.6196	0.482113	32.3982	1.28265e-07	Yes	0	ENSG00000148180	GSN
chr5	135216301	135216778	L2b	+	LINE/L2	L2b	18.3255	0.661574	27.6998	1.362e-07	Yes	0	ENSG00000145832	SLC25A48
chr6	34494561	34494773	ORSL-2a	+	DNA/hAT-Tip100	ORSL-2a	30.3105	0.797666	37.999	1.362e-07	Yes	0	ENSG00000124507	PACSIN1
chr10	81902480	81902778	AluJb	-	SINE/Alu	AluJb	23.6859	0.697096	33.978	1.3641e-07	Yes	0	ENSG00000189129	PLAC9
chr17	72871220	72871454	MIR	+	SINE/MIR	MIR	19.3104	0.645949	29.8946	1.4465e-07	Yes	1975	ENSG00000172782	FADS6
chr7	130763999	130764478	L2c	+	LINE/L2	L2c	6.86107	0.426022	16.1049	1.45099e-07	Yes	-30378	ENSG00000128585	MKLN1
chr1	168050972	168051036	MIRb	+	SINE/MIR	MIRb	3.34383	40.3785	-12.0755	1.54509e-07	Yes	2962	ENSG00000143147	GPR161
chr5	82878372	82878536	MIR	-	SINE/MIR	MIR	1.26713	18.2334	-14.3895	1.54906e-07	Yes	251	ENSG00000038427	VCAN
chr3	196697588	196698447	MER54A	-	LTR/ERVL	MER54A	53.3126	1.49269	35.7158	1.58081e-07	Yes	-1658	ENSG00000119227	PIGZ
chr9	138602476	138602574	OldhAT1	-	DNA/hAT-Ac	OldhAT1	7.33172	0.428313	17.1177	1.66091e-07	Yes	0	ENSG00000107147	KCNT1
chr2	2836975	2837269	MLT1B	-	LTR/ERVL-MaLR	MLT1B	16.6328	0.625939	26.5725	1.70551e-07	Yes	355428	ENSG00000032389	TSSC1
chr10	134495094	134495646	L1MB3	+	LINE/L1	L1MB3	13.5547	0.557493	24.3136	1.72144e-07	Yes	0	ENSG00000068383	INPP5A
chr21	22148898	22154158	MER61-int|MER61-int|MER61D|MER61-int|MER61-int	-	LTR/ERV1	MER61-int	12.2259	0.511684	23.8935	1.72144e-07	Yes	-216476	ENSG00000154654	NCAM2
chr3	120886335	120892170	L1PA7	+	LINE/L1	L1PA7	72.0627	1.53404	46.9757	1.72144e-07	Yes	0	ENSG00000145087	STXBP5L
chr10	100217049	100217235	MIR	+	SINE/MIR	MIR	11.7265	0.509886	22.9984	1.85207e-07	Yes	1641	ENSG00000172987	HPSE2
chr6	126252870	126253228	THE1D	+	LTR/ERVL-MaLR	THE1D	32.1573	1.32311	24.3044	2.01395e-07	Yes	605	ENSG00000111912	NCOA7
chr14	29262863	29263172	AluJr	+	SINE/Alu	AluJr	12.0654	105.528	-8.74631	2.02653e-07	Yes	0	ENSG00000186960	C14orf23
chr5	63909226	63909383	L2a	+	LINE/L2	L2a	111.82	10.3705	10.7825	2.02745e-07	Yes	1088	ENSG00000186479	RGS7BP
chr1	162418037	162420506	L1PA4	+	LINE/L1	L1PA4	5.47919	0.428262	12.794	2.06216e-07	Yes	-36110	ENSG00000198574	SH2D1B
chr15	52407538	52407708	MIRb	+	SINE/MIR	MIRb	85.2079	10.6972	7.96543	2.15893e-07	Yes	-2567	ENSG00000137875	BCL2L10
chr18	4014085	4014339	AluSc	-	SINE/Alu	AluSc	10.089	0.427746	23.5864	2.37481e-07	Yes	0	ENSG00000170579	DLGAP1
chr6	136658700	136659041	LTR16C	-	LTR/ERVL	LTR16C	31.5018	0.905464	34.7908	2.49519e-07	Yes	4835	ENSG00000135525	MAP7
chr8	89723821	89727090	MER34-int|MER34A	+	LTR/ERV1	MER34-int	89.4059	8.77366	10.1903	2.5343e-07	Yes	-383568	ENSG00000156103	MMP16
chr1	35329512	35329614	MER5A	-	DNA/hAT-Charlie	MER5A	55.5569	3.82162	14.5375	2.59758e-07	Yes	1424	ENSG00000116544	DLGAP3
chr17	76231197	76231371	MSTA	-	LTR/ERVL-MaLR	MSTA	7.73294	0.427952	18.0696	2.59758e-07	Yes	0	ENSG00000204278	TMEM235
chr5	147859115	147859504	X26_DNA	-	DNA/TcMar-Tigger	X26_DNA	20.3584	0.676152	30.1091	2.67369e-07	Yes	0	ENSG00000164270	HTR4
chr8	107597769	107599696	L2a	-	LINE/L2	L2a	13.5665	0.600674	22.5854	2.67369e-07	Yes	0	ENSG00000164830	OXR1
chr4	17486047	17486207	MIRb	+	SINE/MIR	MIRb	81.6417	9.57422	8.52724	2.7239e-07	Yes	0	ENSG00000151552	QDPR
chr2	98958495	98959045	L3	-	LINE/CR1	L3	0.629057	17.9361	-28.5126	2.72436e-07	Yes	0	ENSG00000222000	AC092675.3
chr2	166843252	166844250	L1MC4	-	LINE/L1	L1MC4	12.8987	0.586076	22.0085	2.72564e-07	Yes	1421	ENSG00000144285	SCN1A
chr3	152396043	152397289	HSMAR1	+	DNA/TcMar-Mariner	HSMAR1	15.397	0.645796	23.8418	2.73725e-07	Yes	-155448	ENSG00000169860	P2RY1
chr20	1669559	1669961	MSTA	-	LTR/ERVL-MaLR	MSTA	10.1109	0.495117	20.4213	2.83522e-07	Yes	-31135	ENSG00000089012	SIRPG
chr9	113629397	113629683	MLT1J2	-	LTR/ERVL-MaLR	MLT1J2	8.82079	0.509755	17.304	2.8576e-07	Yes	5861	ENSG00000198121	LPAR1
chr5	138882528	138890961	LTR12|HERV9-int|HERV9-int|LTR12	+	LTR/ERV1	HERV9-int	22.558	0.669379	33.6998	2.94436e-07	Yes	-15056	ENSG00000131508	UBE2D2
chr9	109619703	109619996	AluSz	+	SINE/Alu	AluSz	0.74539	14.7463	-19.7834	2.94436e-07	Yes	-5383	ENSG00000148143	ZNF462
chr16	14100903	14101941	L1MB7	-	LINE/L1	L1MB7	9.8209	0.508374	19.3183	3.01266e-07	Yes	54702	ENSG00000175595	ERCC4
chr5	125832927	125833233	AluSx1	-	SINE/Alu	AluSx1	39.2256	1.86787	21.0002	3.25951e-07	Yes	742	ENSG00000155324	GRAMD3
chr11	33727022	33727343	MLT2B3	+	LTR/ERVL	MLT2B3	215.201	39.2875	5.4776	3.3422e-07	Yes	0	ENSG00000085063	CD59
chr15	40353612	40355162	L2c	-	LINE/L2	L2c	73.6508	4.48261	16.4303	3.39224e-07	Yes	-22224	ENSG00000140319	SRP14
chr6	80230875	80232408	L1MC5	+	LINE/L1	L1MC5	23.1017	0.930577	24.8252	3.5503e-07	Yes	0	ENSG00000135338	LCA5
chr20	31074791	31075100	AluSq2	+	SINE/Alu	AluSq2	1.29913	18.4868	-14.2302	3.58509e-07	Yes	0	ENSG00000197183	C20orf112
chr1	220875273	220875862	LTR64	-	LTR/ERV1	LTR64	9.72316	0.508443	19.1234	3.59222e-07	Yes	2775	ENSG00000162817	C1orf115
chr2	175663604	175663730	MIR3	-	SINE/MIR	MIR3	13.0015	0.553543	23.4879	3.65706e-07	Yes	362	ENSG00000128656	CHN1
chr1	35329859	35330110	L2c	+	LINE/L2	L2c	130.926	10.1401	12.9117	3.66877e-07	Yes	928	ENSG00000116544	DLGAP3
chr14	75912314	75913545	L1MB8	+	LINE/L1	L1MB8	71.7606	9.8024	7.32072	3.73383e-07	Yes	0	ENSG00000140044	JDP2
chr16	74754459	74755053	L1MB8	-	LINE/L1	L1MB8	11.1879	0.467013	23.9563	3.73383e-07	Yes	0	ENSG00000103089	FA2H
chr2	172637792	172639429	L1ME3B	+	LINE/L1	L1ME3B	172.522	28.2977	6.09668	3.73383e-07	Yes	1452	ENSG00000115840	SLC25A12
chr4	108831279	108831342	L2c	-	LINE/L2	L2c	16.6784	0.553367	30.1398	3.73383e-07	Yes	0	ENSG00000164023	SGMS2
chr5	148379261	148379714	L2c	+	LINE/L2	L2c	12.4387	0.534225	23.2836	3.73383e-07	Yes	0	ENSG00000169247	SH3TC2
chr3	72262214	72262576	MSTA	-	LTR/ERVL-MaLR	MSTA	6.5261	0.428291	15.2376	3.74518e-07	Yes	158401	ENSG00000163602	RYBP
chr15	20634184	20634401	L1MEf	+	LINE/L1	L1MEf	11.1392	0.516966	21.5472	3.75768e-07	Yes	102694	ENSG00000215405	GOLGA6L6
chr7	37993918	37994349	L1PA7	+	LINE/L1	L1PA7	24.5095	1.23142	19.9033	3.80859e-07	Yes	0	ENSG00000106483	SFRP4
chr4	159173990	159174231	L2b	+	LINE/L2	L2b	5.73327	0.428279	13.3868	3.85617e-07	Yes	0	ENSG00000164124	TMEM144
chr19	23295553	23297100	MER57A-int|MER57B1	+	LTR/ERV1	MER57A-int	4.64484	45.4713	-9.78963	3.8849e-07	Yes	0	ENSG00000183850	ZNF730
chr5	44742624	44743470	L1ME3A	+	LINE/L1	L1ME3A	49.3504	4.96893	9.93179	3.89947e-07	Yes	-65558	ENSG00000112996	MRPS30
chr2	73275354	73275644	AluSx	-	SINE/Alu	AluSx	24.7995	1.56363	15.8602	4.07869e-07	Yes	0	ENSG00000144040	SFXN5
chr12	99140642	99141975	L1MA4	+	LINE/L1	L1MA4	99.1952	5.70995	17.3724	4.18352e-07	Yes	0	ENSG00000185046	ANKS1B
chr11	75140425	75140576	L2b	+	LINE/L2	L2b	1.30862	21.5015	-16.4307	4.1907e-07	Yes	0	ENSG00000149243	KLHL35
chr15	52407882	52408367	L1MB7	-	LINE/L1	L1MB7	145.328	19.226	7.55893	4.1907e-07	Yes	-2911	ENSG00000137875	BCL2L10
chr1	233812466	233813305	MER4D1	-	LTR/ERV1	MER4D1	14.5622	0.651752	22.3431	4.28941e-07	Yes	4209	ENSG00000135750	KCNK1
chr17	72872497	72872643	MER20	+	DNA/hAT-Charlie	MER20	11.2494	0.545563	20.6198	4.28941e-07	Yes	786	ENSG00000172782	FADS6
chr4	14003068	14005436	THE1B|THE1B-int|THE1B	+	LTR/ERVL-MaLR	THE1B-int	89.254	5.08042	17.5682	4.30895e-07	Yes	-373722	ENSG00000038219	BOD1L1
chr1	49329235	49330356	L1ME3Cz	+	LINE/L1	L1ME3Cz	8.2175	0.482486	17.0316	4.35888e-07	Yes	0	ENSG00000186094	AGBL4
chr10	91044477	91050644	LTR7|HERVH-int|HERVH-int|HERVH-int|HERVH-int|HERVH-int|LTR7	+	LTR/ERV1	HERVH-int	129.542	6.42659	20.1572	4.35888e-07	Yes	0	ENSG00000107798	LIPA
chr19	23284429	23284669	AluSg	-	SINE/Alu	AluSg	1.29551	25.483	-19.6703	4.35888e-07	Yes	0	ENSG00000183850	ZNF730
chr17	6143862	6144751	L2b	+	LINE/L2	L2b	22.3383	0.766476	29.1442	4.37109e-07	Yes	116116	ENSG00000179314	WSCD1
chr2	2782591	2783345	L2	+	LINE/L2	L2	4.5597	0.428226	10.6479	4.37109e-07	Yes	409352	ENSG00000032389	TSSC1
chr20	44027108	44028139	L1MCa	-	LINE/L1	L1MCa	16.4834	0.535244	30.7961	4.37109e-07	Yes	0	ENSG00000254806	SYS1-DBNDD2
chr5	148371708	148371860	MIR	-	SINE/MIR	MIR	7.69253	0.426907	18.0192	4.37109e-07	Yes	0	ENSG00000169247	SH3TC2
chr7	124384488	124384840	L2c	+	LINE/L2	L2c	40.1965	1.6844	23.864	4.59449e-07	Yes	1212	ENSG00000170775	GPR37
chr4	15669240	15669398	Charlie9	+	DNA/hAT-Charlie	Charlie9	0.720174	19.1679	-26.6157	4.73382e-07	Yes	0	ENSG00000118564	FBXL5
chr6	29641589	29641901	AluSp	+	SINE/Alu	AluSp	11.8837	0.424249	28.0111	4.73382e-07	Yes	0	ENSG00000204644	ZFP57
chr21	37476566	37481175	LTR10F|HERVIP10FH-int	+	LTR/ERV1	HERVIP10FH-int	9.59949	0.511754	18.758	5.11788e-07	Yes	-24880	ENSG00000185917	SETD4
chr5	135225581	135225873	AluJb	-	SINE/Alu	AluJb	6.22893	0.462357	13.4721	5.11915e-07	Yes	1256	ENSG00000145832	SLC25A48
chr11	8056611	8056971	MER96B	+	DNA/hAT-Tip100	MER96B	10.7739	0.512145	21.0369	5.18084e-07	Yes	0	ENSG00000166402	TUB
chr3	183957907	183958152	L4_A_Mam	-	LINE/RTE-X	L4_A_Mam	15.2202	0.576587	26.3971	5.18625e-07	Yes	0	ENSG00000145191	EIF2B5
chr9	131543725	131544226	LOR1a	+	LTR/ERV1	LOR1a	13.9279	0.812228	17.1477	5.18625e-07	Yes	-5258	ENSG00000107021	TBC1D13
chr10	81916803	81916987	MIRb	-	SINE/MIR	MIRb	17.9553	0.822716	21.8244	5.25566e-07	Yes	0	ENSG00000122359	ANXA11
chr6	170735656	170739842	MER65A|MER101-int|MER101-int	-	LTR/ERV1	MER101-int	33.4191	1.21426	27.5223	5.26285e-07	Yes	19504	ENSG00000112584	FAM120B
chr19	53016702	53016999	AluY	+	SINE/Alu	AluY	1.94184	25.0016	-12.8752	5.39809e-07	Yes	1296	ENSG00000258405	ZNF578
chr4	159185680	159188839	L1MC1	-	LINE/L1	L1MC1	10.717	0.425583	25.182	5.55679e-07	Yes	9118	ENSG00000164124	TMEM144
chr15	42698299	42698535	MIR	-	SINE/MIR	MIR	17.543	0.426559	41.1267	5.6211e-07	Yes	0	ENSG00000092529	CAPN3
chr3	72262743	72263218	MLT1D	-	LTR/ERVL-MaLR	MLT1D	6.97344	0.427239	16.3221	5.64492e-07	Yes	157759	ENSG00000163602	RYBP
chr9	138602886	138602982	L1MD	-	LINE/L1	L1MD	5.28663	0.428289	12.3436	5.64492e-07	Yes	0	ENSG00000107147	KCNT1
chr3	106234926	106237791	L1PA12	+	LINE/L1	L1PA12	62.9089	3.07511	20.4574	5.72227e-07	Yes	-646531	ENSG00000114423	CBLB
chrX	28910237	28916285	LTR7|HERVH-int|HERVH-int|HERVH-int|HERVH-int|HERVH-int|LTR7	-	LTR/ERV1	HERVH-int	49.0457	1.32197	37.1006	5.72227e-07	Yes	0	ENSG00000169306	IL1RAPL1
chr19	35828161	35828556	L2a	-	LINE/L2	L2a	6.49132	0.428185	15.1601	5.78341e-07	Yes	0	ENSG00000012124	CD22
chr1	205482124	205482432	L3b	+	LINE/CR1	L3b	4.90514	0.428223	11.4546	6.0734e-07	Yes	0	ENSG00000117266	CDK18
chr2	207419548	207420294	L2	+	LINE/L2	L2	13.9842	0.560355	24.956	6.0734e-07	Yes	0	ENSG00000114948	ADAM23
chr1	248842064	248842446	HAL1	+	LINE/L1	HAL1	4.82656	0.427965	11.2779	6.11776e-07	Yes	2183	ENSG00000189181	OR14I1
chr20	1707885	1714216	LTR7|HERVH-int|HERVH-int|HERVH-int|HERVH-int|HERVH-int|LTR7	-	LTR/ERV1	HERVH-int	15.82	0.649777	24.3468	6.14446e-07	Yes	-69461	ENSG00000089012	SIRPG
chr4	86927746	86929741	L2a	+	LINE/L2	L2a	113.987	5.67643	20.0808	6.14446e-07	Yes	3924	ENSG00000138639	ARHGAP24
chr8	6617706	6617937	AluJr	+	SINE/Alu	AluJr	18.1003	116.956	-6.46156	6.14446e-07	Yes	523	ENSG00000155189	AGPAT5
chr2	78192266	78197976	LTR7B|HERVH-int|HERVH-int|HERVH-int|HERVH-int|HERVH-int|HERVH-int|LTR7B	+	LTR/ERV1	HERVH-int	12.2739	0.60901	20.1539	6.21119e-07	Yes	-371822	ENSG00000176204	LRRTM4
chrX	139862129	139862369	MIRb	+	SINE/MIR	MIRb	20.8363	1.17483	17.7355	6.3943e-07	Yes	3057	ENSG00000184258	CDR1
chr5	150035529	150035757	MIR	-	SINE/MIR	MIR	7.2652	0.427095	17.0107	6.48826e-07	Yes	0	ENSG00000171992	SYNPO
chr6	76460332	76460596	AluSx	-	SINE/Alu	AluSx	2.33526	33.0859	-14.168	6.58707e-07	Yes	0	ENSG00000196586	MYO6
chr3	72263332	72264140	L2a	+	LINE/L2	L2a	6.12292	0.426415	14.3591	6.70784e-07	Yes	156837	ENSG00000163602	RYBP
chr5	146267545	146268679	L2a	+	LINE/L2	L2a	5.91248	0.424891	13.9153	6.82992e-07	Yes	0	ENSG00000156475	PPP2R2B
chr12	113566830	113567277	L2b	-	LINE/L2	L2b	12.1752	0.464905	26.1885	6.83553e-07	Yes	0	ENSG00000111344	RASAL1
chr1	40117420	40117732	AluSx1	+	SINE/Alu	AluSx1	15.5064	0.749344	20.6934	6.98542e-07	Yes	7062	ENSG00000116981	NT5C1A
chr6	6346309	6346646	AluSz	-	SINE/Alu	AluSz	10.7726	0.512239	21.0305	7.1744e-07	Yes	-25064	ENSG00000124491	F13A1
chr21	45830940	45832524	L1MB7	-	LINE/L1	L1MB7	5.10119	0.426895	11.9495	7.25487e-07	Yes	0	ENSG00000142185	TRPM2
chr11	134149249	134149559	AluSx1	-	SINE/Alu	AluSx1	15.4067	0.673015	22.8921	7.28953e-07	Yes	0	ENSG00000166105	GLB1L3
chr13	101873767	101878834	HERVFH19-int|LTR19A	+	LTR/ERV1	HERVFH19-int	10.3741	0.529691	19.5853	7.72398e-07	Yes	0	ENSG00000102452	NALCN
chr10	98106815	98107150	AluSq10	-	SINE/Alu	AluSq10	5.34183	0.427957	12.4822	7.73631e-07	Yes	0	ENSG00000197430	OPALIN
chr16	24887234	24887546	AluSz	+	SINE/Alu	AluSz	7.945	0.470373	16.8909	7.74614e-07	Yes	0	ENSG00000158865	SLC5A11
chr4	139235380	139236951	L1PREC2	-	LINE/L1	L1PREC2	5.33688	0.428153	12.4649	7.74614e-07	Yes	-71878	ENSG00000151012	SLC7A11
chr1	201861853	201862177	AluSx1	+	SINE/Alu	AluSx1	54.8087	5.49434	9.97549	7.84012e-07	Yes	420	ENSG00000198892	SHISA4
chr5	36247703	36248011	AluSx1	+	SINE/Alu	AluSx1	79.2494	3.3774	23.4646	7.84012e-07	Yes	526	ENSG00000164188	RANBP3L
chr18	74709960	74710407	L1MB3	-	LINE/L1	L1MB3	6.90994	0.427154	16.1767	7.91923e-07	Yes	0	ENSG00000197971	MBP
chr9	131014660	131014790	L2d2	-	LINE/L2	L2d2	42.8386	1.70806	25.0803	7.91923e-07	Yes	0	ENSG00000106976	DNM1
chr15	42699390	42699531	MIRc	-	SINE/MIR	MIRc	10.2169	0.487118	20.9741	8.29121e-07	Yes	0	ENSG00000092529	CAPN3
chr3	185357781	185359145	Tigger1	+	DNA/TcMar-Tigger	Tigger1	1.5697	31.84	-20.2841	8.48077e-07	Yes	2383	ENSG00000073792	IGF2BP2
chr6	157626299	157626883	MLT1L	-	LTR/ERVL-MaLR	MLT1L	16.4003	0.69938	23.4497	8.48077e-07	Yes	83536	ENSG00000215712	TMEM242
chr9	113628937	113629396	MER4C	-	LTR/ERV1	MER4C	16.3608	0.917001	17.8417	8.48077e-07	Yes	6148	ENSG00000198121	LPAR1
chr1	205524498	205524924	L4_A_Mam	-	LINE/RTE-X	L4_A_Mam	37.5111	1.20501	31.1294	8.50093e-07	Yes	-13090	ENSG00000174514	MFSD4
chr19	4044114	4044177	L2	+	LINE/L2	L2	54.8817	2.96123	18.5334	8.50093e-07	Yes	186	ENSG00000178951	ZBTB7A
chr2	73275674	73275761	L1ME4a	+	LINE/L1	L1ME4a	6.11934	0.4675	13.0895	8.50093e-07	Yes	0	ENSG00000144040	SFXN5
chr20	42214676	42214970	AluSz	-	SINE/Alu	AluSz	26.4483	0.783719	33.7472	8.50093e-07	Yes	0	ENSG00000101049	SGK2
chr3	133468580	133469210	MER67B	-	LTR/ERV1	MER67B	6.26128	0.428319	14.6183	8.50093e-07	Yes	0	ENSG00000091513	TF
chr9	124058800	124058976	MIR3	-	SINE/MIR	MIR3	9.38185	0.488258	19.215	8.61426e-07	Yes	0	ENSG00000148180	GSN
chr10	88802764	88803163	L1M4	-	LINE/L1	L1M4	21.3856	1.36021	15.7223	8.70066e-07	Yes	7081	ENSG00000148672	GLUD1
chr6	80752661	80753760	L1MC1	-	LINE/L1	L1MC1	0.850284	21.6628	-25.4771	8.72375e-07	Yes	418	ENSG00000112742	TTK
chr20	37511351	37511690	L2b	-	LINE/L2	L2b	3.70151	0.428253	8.64327	8.73372e-07	Yes	0	ENSG00000101445	PPP1R16B
chr1	46691213	46691637	MLT1D	-	LTR/ERVL-MaLR	MLT1D	29.6908	1.16123	25.5685	8.79214e-07	Yes	4281	ENSG00000171357	LURAP1
chr19	47938185	47938484	AluSx1	+	SINE/Alu	AluSx1	4.98878	0.428188	11.6509	8.79214e-07	Yes	0	ENSG00000118160	SLC8A2
chr19	19965986	19967242	LTR70	-	LTR/ERV1	LTR70	0.901737	14.6567	-16.2539	9.03049e-07	Yes	-9454	ENSG00000256771	ZNF253
chr6	157623879	157624167	L3	+	LINE/CR1	L3	14.4328	0.555235	25.9941	9.03049e-07	Yes	86252	ENSG00000215712	TMEM242
chr2	201263797	201264202	L1MB1	-	LINE/L1	L1MB1	4.74938	0.427845	11.1007	9.37968e-07	Yes	0	ENSG00000196141	SPATS2L
chr10	81902223	81902479	Charlie4a	+	DNA/hAT-Charlie	Charlie4a	16.5422	0.612551	27.0055	9.47169e-07	Yes	0	ENSG00000189129	PLAC9
chr20	1790351	1791337	L2a	+	LINE/L2	L2a	5.2159	0.467118	11.1661	9.72199e-07	Yes	-83818	ENSG00000198053	SIRPA
chr21	48007758	48011149	L1PB1	+	LINE/L1	L1PB1	62.5894	4.27348	14.646	9.72199e-07	Yes	7727	ENSG00000160307	S100B
chr5	87723058	87723241	MLT1B	+	LTR/ERVL-MaLR	MLT1B	1.06373	14.9227	-14.0286	9.72199e-07	Yes	-157766	ENSG00000164180	TMEM161B
chr3	170141930	170142225	L2b	-	LINE/L2	L2b	16.7287	0.577519	28.9664	9.75938e-07	Yes	0	ENSG00000013297	CLDN11
chr5	136091209	136092198	L1MA9	-	LINE/L1	L1MA9	9.11961	0.545267	16.7251	9.79606e-07	Yes	218790	ENSG00000152377	SPOCK1
chr5	136090590	136090793	MamTip2b	-	DNA/hAT-Tip100	MamTip2b	5.94799	0.421948	14.0965	1.02881e-06	Yes	220195	ENSG00000152377	SPOCK1
chr13	24308759	24309502	HUERS-P3-int|LTR9B	+	LTR/ERV1	HUERS-P3-int	12.8011	0.612301	20.9065	1.0734e-06	Yes	0	ENSG00000027001	MIPEP
chr6	3229776	3229888	MIR3	-	SINE/MIR	MIR3	2.59053	24.0829	-9.29648	1.0734e-06	Yes	0	ENSG00000137285	TUBB2B
chr14	68033181	68033482	AluSz	+	SINE/Alu	AluSz	22.8614	0.742021	30.8097	1.07668e-06	Yes	0	ENSG00000054690	PLEKHH1
chr1	248883347	248884525	L1M2b	+	LINE/L1	L1M2b	4.04911	0.427349	9.47494	1.07901e-06	Yes	18192	ENSG00000266949	LYPD8
chr19	36750410	36756122	LTR7B|HERVH-int|HERVH-int|HERVH-int|HERVH-int|HERVH-int|HERVH-int|LTR7B	-	LTR/ERV1	HERVH-int	60.836	2.4724	24.606	1.09986e-06	Yes	-13252	ENSG00000196357	ZNF565
chr12	21430848	21434103	L1MA3	+	LINE/L1	L1MA3	6.95483	0.468085	14.858	1.16612e-06	Yes	0	ENSG00000084453	SLCO1A2
chrX	120150927	120151130	MER67C	-	LTR/ERV1	MER67C	7.92749	0.537878	14.7385	1.17308e-06	Yes	-30333	ENSG00000182890	GLUD2
chr7	130735230	130735659	L2a	+	LINE/L2	L2a	4.23369	0.426758	9.92058	1.17405e-06	Yes	-59197	ENSG00000128585	MKLN1
chr4	158307810	158310628	L1MEc	-	LINE/L1	L1MEc	12.0447	0.582686	20.6709	1.18336e-06	Yes	20584	ENSG00000120251	GRIA2
chr1	38765828	38766338	L1ME4a	+	LINE/L1	L1ME4a	18.4018	0.877345	20.9744	1.20413e-06	Yes	-253379	ENSG00000185668	POU3F1
chr5	80393155	80394472	L2a	-	LINE/L2	L2a	11.9459	0.672239	17.7703	1.20413e-06	Yes	0	ENSG00000113319	RASGRF2
chr19	47150364	47150658	AluJb	-	SINE/Alu	AluJb	47.0099	4.75371	9.8891	1.20844e-06	Yes	212	ENSG00000197380	DACT3
chr11	85413592	85415684	L1MEg	+	LINE/L1	L1MEg	7.85877	0.467531	16.8091	1.21461e-06	Yes	0	ENSG00000137501	SYTL2
chr10	50953111	50953308	L2c	+	LINE/L2	L2c	23.7722	1.02992	23.0815	1.22404e-06	Yes	0	ENSG00000197444	OGDHL
chr4	159183325	159183744	L1ME4b	-	LINE/L1	L1ME4b	6.08921	0.427717	14.2366	1.22404e-06	Yes	6763	ENSG00000164124	TMEM144
chr3	50309037	50309342	L2b	-	LINE/L2	L2b	8.29423	0.428315	19.3648	1.22876e-06	Yes	-7117	ENSG00000179564	LSMEM2
chr2	73279132	73279468	L1MC4	-	LINE/L1	L1MC4	11.6717	0.575503	20.2809	1.24772e-06	Yes	0	ENSG00000144040	SFXN5
chr4	21922755	21924026	L2b	+	LINE/L2	L2b	15.9383	0.590955	26.9704	1.29766e-06	Yes	0	ENSG00000185774	KCNIP4
chr14	68029815	68029890	MIRb	-	SINE/MIR	MIRb	11.5542	0.585477	19.7347	1.31543e-06	Yes	0	ENSG00000054690	PLEKHH1
chr1	44975278	44975578	AluSz6	+	SINE/Alu	AluSz6	8.73679	0.428329	20.3974	1.32245e-06	Yes	0	ENSG00000187147	RNF220
chr6	6344770	6344906	MamGypsy2-I	+	LTR/Gypsy	MamGypsy2-I	7.37543	0.428283	17.2209	1.33388e-06	Yes	-23525	ENSG00000124491	F13A1
chr1	223408538	223415006	L1MC1	-	LINE/L1	L1MC1	37.0415	2.04866	18.0808	1.34677e-06	Yes	0	ENSG00000143502	SUSD4
chr14	89285920	89286399	LTR15	-	LTR/ERV1	LTR15	7.1937	0.560535	12.8336	1.347e-06	Yes	-4099	ENSG00000165533	TTC8
chr21	48018268	48018527	AluSg	-	SINE/Alu	AluSg	26.5851	1.19843	22.1833	1.35183e-06	Yes	349	ENSG00000160307	S100B
chr20	30557748	30557842	MIR	+	SINE/MIR	MIR	1.4441	15.4923	-10.7279	1.36145e-06	Yes	0	ENSG00000260903	XKR7
chr1	35329749	35329789	L2c	+	LINE/L2	L2c	59.3993	4.57091	12.9951	1.36338e-06	Yes	1249	ENSG00000116544	DLGAP3
chr15	101433421	101433683	L2d	-	LINE/L2	L2d	17.6877	0.73843	23.9532	1.36338e-06	Yes	0	ENSG00000184254	ALDH1A3
chr20	5901002	5901346	MLT1A	-	LTR/ERVL-MaLR	MLT1A	3.74521	0.427138	8.76816	1.37054e-06	Yes	0	ENSG00000089199	CHGB
chr9	131190246	131190387	L2b	+	LINE/L2	L2b	11.5246	0.54997	20.9549	1.41518e-06	Yes	0	ENSG00000167123	CERCAM
chr1	213128059	213128232	L3	-	LINE/CR1	L3	0.742701	10.75	-14.4742	1.4402e-06	Yes	0	ENSG00000143494	VASH2
chr5	702586	708616	LTR7B|HERVH-int|HERVH-int|HERVH-int|HERVH-int|HERVH-int|HERVH-int|LTR7B	+	LTR/ERV1	HERVH-int	96.7433	6.95469	13.9105	1.4402e-06	Yes	1856	ENSG00000188818	ZDHHC11
chr1	168053586	168053770	MIR3	-	SINE/MIR	MIR3	5.26978	65.7224	-12.4716	1.44589e-06	Yes	228	ENSG00000143147	GPR161
chr10	88800667	88800973	AluSc	-	SINE/Alu	AluSc	32.1083	1.80384	17.8	1.46315e-06	Yes	9271	ENSG00000148672	GLUD1
chr5	147859937	147860215	AluSz	-	SINE/Alu	AluSz	17.6285	0.87546	20.1363	1.48671e-06	Yes	0	ENSG00000164270	HTR4
chr18	74702128	74702635	MER31B	-	LTR/ERV1	MER31B	12.9634	0.424691	30.5243	1.49817e-06	Yes	0	ENSG00000197971	MBP
chr10	98115288	98115734	MamTip3	+	DNA/hAT-Tip100	MamTip3	8.37836	0.426513	19.6439	1.49922e-06	Yes	0	ENSG00000197430	OPALIN
chr9	139662184	139662516	L1ME1	+	LINE/L1	L1ME1	4.98782	0.427876	11.6572	1.49922e-06	Yes	-1478	ENSG00000177984	LCN15
chr3	133489842	133490300	L1MC4	+	LINE/L1	L1MC4	12.8877	0.426061	30.2485	1.50087e-06	Yes	0	ENSG00000091513	TF
chr1	151828279	151828865	LTR61	+	LTR/ERV1	LTR61	74.9339	2.77113	27.0409	1.52221e-06	Yes	-2107	ENSG00000196407	THEM5
chr2	201266548	201267365	L2c	+	LINE/L2	L2c	6.63401	0.428227	15.4918	1.52221e-06	Yes	0	ENSG00000196141	SPATS2L
chr2	207671564	207677351	LTR7|HERVH-int|HERVH-int|HERVH-int|HERVH-int|HERVH-int|HERVH-int|LTR7	-	LTR/ERV1	HERVH-int	16.4733	0.833806	19.7567	1.52663e-06	Yes	14332	ENSG00000118246	FASTKD2
chr13	36890462	36896328	LTR7|HERVH-int|HERVH-int|HERVH-int|HERVH-int|HERVH-int|LTR7	+	LTR/ERV1	HERVH-int	41.2793	2.64689	15.5954	1.54707e-06	Yes	0	ENSG00000133104	SPG20
chr17	18568127	18569227	Charlie1	+	DNA/hAT-Charlie	Charlie1	5.94643	52.2836	-8.79245	1.56825e-06	Yes	0	ENSG00000249459	ZNF286B
chr19	614475	614654	L2a	-	LINE/L2	L2a	10.7334	0.595103	18.0362	1.56825e-06	Yes	0	ENSG00000099822	HCN2
chr14	68029908	68030101	MIR	+	SINE/MIR	MIR	13.16	0.484271	27.1749	1.58571e-06	Yes	0	ENSG00000054690	PLEKHH1
chr21	45898980	45900001	LTR13	-	LTR/ERVK	LTR13	1.52492	23.1451	-15.1779	1.58571e-06	Yes	16903	ENSG00000269430	LRRC3DN
chr1	223377406	223377804	Arthur1	-	DNA/hAT-Tip100	Arthur1	48.8252	2.84095	17.1862	1.58932e-06	Yes	16358	ENSG00000143502	SUSD4
chr1	233811614	233811865	Charlie31a	-	DNA/hAT-Charlie	Charlie31a	16.8217	0.978978	17.1829	1.58932e-06	Yes	3357	ENSG00000135750	KCNK1
chr1	55177038	55177404	L1ME5	+	LINE/L1	L1ME5	16.2026	0.833071	19.4492	1.60241e-06	Yes	0	ENSG00000271723	MROH7-TTC4
chr1	112222731	112223216	LTR12B	-	LTR/ERV1	LTR12B	25.2221	1.16399	21.6687	1.60241e-06	Yes	0	ENSG00000116473	RAP1A
chr11	124612550	124612696	MIRb	+	SINE/MIR	MIRb	3.39608	0.427389	7.9461	1.60241e-06	Yes	0	ENSG00000154146	NRGN
chr1	20016359	20017137	LTR28B	+	LTR/ERV1	LTR28B	3.81512	0.428196	8.90976	1.63609e-06	Yes	0	ENSG00000162542	TMCO4
chr21	48003834	48004560	L1M4b	+	LINE/L1	L1M4b	16.3806	1.02056	16.0506	1.64517e-06	Yes	13909	ENSG00000160305	DIP2A
chr1	160101778	160102733	L2d2	-	LINE/L2	L2d2	31.3182	4.88234	6.4146	1.64837e-06	Yes	0	ENSG00000018625	ATP1A2
chr15	101612692	101618498	LTR7|HERVH-int|HERVH-int|HERVH-int|HERVH-int|HERVH-int|HERVH-int|LTR7	+	LTR/ERV1	HERVH-int	27.3062	1.29953	21.0123	1.66402e-06	Yes	2376	ENSG00000154237	LRRK1
chr13	93179536	93179905	L2b	-	LINE/L2	L2b	6.82205	0.462677	14.7447	1.69877e-06	Yes	0	ENSG00000179399	GPC5
chr12	120080380	120080527	MIRc	+	SINE/MIR	MIRc	8.54901	0.510148	16.7579	1.75113e-06	Yes	1018	ENSG00000224982	TMEM233
chr9	116123136	116123601	MER31A	+	LTR/ERV1	MER31A	4.37938	0.428313	10.2247	1.76486e-06	Yes	0	ENSG00000119411	BSPRY
chr10	1182856	1183381	L1ME1	-	LINE/L1	L1ME1	147.719	13.8284	10.6823	1.79132e-06	Yes	4620	ENSG00000047056	WDR37
chr2	166842509	166842848	Charlie18a	-	DNA/hAT-Charlie	Charlie18a	21.8847	0.919678	23.7961	1.84418e-06	Yes	2823	ENSG00000144285	SCN1A
chr13	114800157	114800383	L1MC	+	LINE/L1	L1MC	7.23574	0.511246	14.1531	1.89272e-06	Yes	0	ENSG00000185989	RASA3
chr17	79351881	79352177	AluSp	-	SINE/Alu	AluSp	7.88863	0.584186	13.5036	1.89272e-06	Yes	-17099	ENSG00000263053	RP11-1055B8.6
chr5	45256627	45256976	AluJr	-	SINE/Alu	AluJr	27.41	1.85095	14.8086	1.89272e-06	Yes	2374	ENSG00000164588	HCN1
chr5	152099578	152104582	LTR10B1|HERVIP10B3-int|HERVIP10B3-int|HERVIP10B3-int|HERVIP10B3-int|LTR10B1	+	LTR/ERV1	HERVIP10B3-int	10.2026	0.511771	19.9359	1.89272e-06	Yes	-286650	ENSG00000132911	NMUR2
chr8	89898533	89898873	MER1B	+	DNA/hAT-Charlie	MER1B	9.94111	0.581321	17.1009	1.89534e-06	Yes	-558280	ENSG00000156103	MMP16
chr8	119535750	119537786	L2a	+	LINE/L2	L2a	6.31678	0.483844	13.0554	1.93007e-06	Yes	0	ENSG00000177570	SAMD12
chr1	161339674	161339902	L1ME4b	-	LINE/L1	L1ME4b	38.0174	5.36963	7.08007	1.94357e-06	Yes	-2011	ENSG00000188931	C1orf192
chr11	12272548	12272784	MER5C1	+	DNA/hAT-Charlie	MER5C1	5.61311	0.468622	11.9779	1.94357e-06	Yes	0	ENSG00000133816	MICAL2
chr18	74706989	74708808	L1ME1	+	LINE/L1	L1ME1	20.7164	0.55543	37.298	1.94357e-06	Yes	0	ENSG00000197971	MBP
chr2	61248198	61249617	L1P2	+	LINE/L1	L1P2	6.93323	41.4067	-5.97221	1.94357e-06	Yes	0	ENSG00000162928	PEX13
chr2	142822732	142824897	MLT1D|MLT1D-int|MLT1D-int|MLT1D	-	LTR/ERVL-MaLR	MLT1D-int	4.94405	0.425161	11.6287	1.94357e-06	Yes	0	ENSG00000168702	LRP1B
chr2	207417820	207418172	AluSz	+	SINE/Alu	AluSz	15.3787	0.863112	17.8178	1.94357e-06	Yes	0	ENSG00000114948	ADAM23
chr20	1871648	1871822	MIRb	+	SINE/MIR	MIRb	30.0614	3.36459	8.93463	1.94357e-06	Yes	-3333	ENSG00000198053	SIRPA
chr3	170141569	170141841	AluSx	+	SINE/Alu	AluSx	8.87153	0.426254	20.8128	1.94357e-06	Yes	0	ENSG00000013297	CLDN11
chr4	86930046	86930953	L2a	+	LINE/L2	L2a	42.3407	3.12375	13.5544	1.94357e-06	Yes	5324	ENSG00000109339	MAPK10
chr9	113632553	113632832	L1MD1	+	LINE/L1	L1MD1	6.3601	0.466425	13.6358	1.94357e-06	Yes	2712	ENSG00000198121	LPAR1
chr12	121624391	121624701	AluSx1	+	SINE/Alu	AluSx1	50.0048	6.51025	7.68093	1.97112e-06	Yes	516	ENSG00000089041	P2RX7
chr4	78086597	78086759	AluJb	-	SINE/Alu	AluJb	3.51166	33.7881	-9.6217	1.97112e-06	Yes	0	ENSG00000138764	CCNG2
chr10	81905682	81906266	MER44B	+	DNA/TcMar-Tigger	MER44B	20.9576	1.05843	19.8008	1.97949e-06	Yes	568	ENSG00000189129	PLAC9
chr5	149609601	149609913	AluSg	+	SINE/Alu	AluSg	8.6999	0.548452	15.8626	2.00026e-06	Yes	0	ENSG00000070808	CAMK2A
chr1	55178394	55178732	MLT1A0	+	LTR/ERVL-MaLR	MLT1A0	14.0414	0.566899	24.7687	2.026e-06	Yes	0	ENSG00000271723	MROH7-TTC4
chr11	63338306	63338393	AluJr	-	SINE/Alu	AluJr	6.01003	0.428175	14.0364	2.04162e-06	Yes	2275	ENSG00000176485	PLA2G16
chr14	101316641	101316963	AluSg	+	SINE/Alu	AluSg	213.678	10.0537	21.2537	2.04162e-06	Yes	-21105	ENSG00000267918	AL117190.2
chr1	151827855	151828153	AluSq	-	SINE/Alu	AluSq	25.518	1.69032	15.0966	2.05437e-06	Yes	-1683	ENSG00000196407	THEM5
chr1	31825594	31827240	L1MB3	-	LINE/L1	L1MB3	20.7724	1.14749	18.1024	2.06421e-06	Yes	0	ENSG00000121766	ZCCHC17
chr9	138603714	138603909	MIRb	-	SINE/MIR	MIRb	7.41226	0.428033	17.317	2.06421e-06	Yes	0	ENSG00000107147	KCNT1
chr1	168052397	168052447	L2d2	+	LINE/L2	L2d2	3.08428	37.5631	-12.1789	2.06959e-06	Yes	1551	ENSG00000143147	GPR161
chr10	134782209	134784043	L1MEf	-	LINE/L1	L1MEf	4.95005	0.42833	11.5566	2.09062e-06	Yes	-25883	ENSG00000171811	TTC40
chr6	136662688	136663397	LTR82B	+	LTR/ERVL	LTR82B	23.8475	0.957145	24.9153	2.09062e-06	Yes	479	ENSG00000135525	MAP7
chr1	35329008	35329150	L2c	+	LINE/L2	L2c	72.3427	3.73133	19.3879	2.12069e-06	Yes	1888	ENSG00000116544	DLGAP3
chr5	83965081	83967447	MSTA|MSTA-int|MSTA	+	LTR/ERVL-MaLR	MSTA-int	9.85042	0.507963	19.392	2.1262e-06	Yes	-284471	ENSG00000164176	EDIL3
chr9	108165795	108166416	L2b	-	LINE/L2	L2b	9.80454	0.586129	16.7276	2.14019e-06	Yes	0	ENSG00000070214	SLC44A1
chrX	111865142	111865275	MLT1H	-	LTR/ERVL-MaLR	MLT1H	15.5348	0.827604	18.7708	2.15071e-06	Yes	8602	ENSG00000182508	LHFPL1
chr5	146307715	146308950	L2a	+	LINE/L2	L2a	5.53608	0.464651	11.9145	2.16231e-06	Yes	0	ENSG00000156475	PPP2R2B
chr8	40378160	40378672	L1MA6	-	LINE/L1	L1MA6	24.113	1.23929	19.4571	2.16231e-06	Yes	9438	ENSG00000165061	ZMAT4
chr3	170535404	170541550	LTR7|HERVH-int|HERVH-int|HERVH-int|HERVH-int|LTR7	-	LTR/ERV1	HERVH-int	8.45725	0.510609	16.5631	2.16569e-06	Yes	0	ENSG00000013297	CLDN11
chr5	87725754	87728065	THE1D|THE1D-int|THE1D	-	LTR/ERVL-MaLR	THE1D-int	5.54159	50.6673	-9.14309	2.17294e-06	Yes	-160462	ENSG00000164180	TMEM161B
chr20	7943168	7943475	AluSx1	+	SINE/Alu	AluSx1	1.155	17.1936	-14.8863	2.21333e-06	Yes	14521	ENSG00000125827	TMX4
chr1	205032786	205033372	L2a	-	LINE/L2	L2a	15.0668	0.807579	18.6568	2.21916e-06	Yes	0	ENSG00000184144	CNTN2
chr15	42698642	42698878	MIRb	-	SINE/MIR	MIRb	19.9469	0.667729	29.8728	2.21916e-06	Yes	0	ENSG00000092529	CAPN3
chr19	6708146	6708459	AluSz	-	SINE/Alu	AluSz	8.5242	0.510125	16.71	2.25361e-06	Yes	0	ENSG00000125730	C3
chr12	49308894	49310409	SVA_D	-	Retroposon/SVA	SVA_D	36.6041	2.44369	14.979	2.28687e-06	Yes	0	ENSG00000272822	RP11-302B13.5
chrX	134225266	134225966	L1MB5	-	LINE/L1	L1MB5	42.8235	6.23069	6.87299	2.29921e-06	Yes	-39041	ENSG00000203950	FAM127B
chr12	99208884	99210035	L2a	+	LINE/L2	L2a	24.9939	1.14003	21.9239	2.31837e-06	Yes	0	ENSG00000185046	ANKS1B
chr17	27705906	27706251	AluSx1	+	SINE/Alu	AluSx1	7.7272	0.46659	16.561	2.31837e-06	Yes	-11232	ENSG00000160551	TAOK1
chr19	34875666	34875957	AluSz	+	SINE/Alu	AluSz	17.2264	0.727464	23.6801	2.31837e-06	Yes	0	ENSG00000105220	GPI
chr19	53017028	53017297	AluSx	+	SINE/Alu	AluSx	2.85111	26.5536	-9.31343	2.31837e-06	Yes	1622	ENSG00000258405	ZNF578
chr2	127834024	127834154	L2d	+	LINE/L2	L2d	3.27769	0.428215	7.65432	2.32431e-06	Yes	0	ENSG00000136717	BIN1
chr1	35329274	35329401	MIR	+	SINE/MIR	MIR	64.1645	3.91062	16.4077	2.37126e-06	Yes	1637	ENSG00000116544	DLGAP3
chr3	133490986	133491060	L2b	+	LINE/L2	L2b	7.01048	0.427905	16.3833	2.37264e-06	Yes	0	ENSG00000091513	TF
chr17	6360363	6360799	L2c	+	LINE/L2	L2c	3.15593	0.428296	7.36857	2.40213e-06	Yes	0	ENSG00000091622	PITPNM3
chr11	1287758	1288536	THE1A-int|THE1A	-	LTR/ERVL-MaLR	THE1A-int	55.6141	6.5699	8.46499	2.41841e-06	Yes	4353	ENSG00000117983	MUC5B
chr19	35305331	35305699	THE1D	+	LTR/ERVL-MaLR	THE1D	0.622972	11.3284	-18.1845	2.41841e-06	Yes	-41198	ENSG00000153896	ZNF599
chr3	46459047	46465391	LTR18A|HERVL18-int|HERVL18-int|HERVL18-int|LTR18A	-	LTR/ERVL	HERVL18-int	8.19546	0.558946	14.6624	2.41841e-06	Yes	4560	ENSG00000121797	CCRL2
chr3	159951918	159952422	LTR26B	-	LTR/ERV1	LTR26B	11.4098	0.569692	20.0279	2.41841e-06	Yes	0	ENSG00000248710	RP11-432B6.3
chr4	17486896	17487180	AluJr	+	SINE/Alu	AluJr	59.3581	6.62605	8.9583	2.41841e-06	Yes	0	ENSG00000151552	QDPR
chr9	131014264	131014480	MIRc	+	SINE/MIR	MIRc	41.0436	1.23623	33.2007	2.41841e-06	Yes	0	ENSG00000106976	DNM1
chr9	124060437	124060698	L2d	+	LINE/L2	L2d	15.5757	0.508643	30.6221	2.43333e-06	Yes	0	ENSG00000148180	GSN
chr13	74045947	74046258	AluSq	-	SINE/Alu	AluSq	5.94544	0.428313	13.8811	2.5232e-06	Yes	213969	ENSG00000118922	KLF12
chr1	46690450	46690732	AluSz	-	SINE/Alu	AluSz	15.6013	0.890556	17.5186	2.55571e-06	Yes	3518	ENSG00000171357	LURAP1
chr12	120149489	120149757	AluJo	-	SINE/Alu	AluJo	7.42648	0.533447	13.9217	2.59673e-06	Yes	0	ENSG00000122966	CIT
chr17	42638099	42638381	AluSx4	-	SINE/Alu	AluSx4	6.28156	80.2673	-12.7782	2.6069e-06	Yes	1193	ENSG00000180340	FZD2
chr13	93521167	93521342	MIRb	-	SINE/MIR	MIRb	12.1993	0.629713	19.3727	2.60873e-06	Yes	1678	ENSG00000179399	GPC5
chr19	23283433	23283754	AluSg	-	SINE/Alu	AluSg	1.35213	19.4116	-14.3564	2.60873e-06	Yes	0	ENSG00000183850	ZNF730
chr3	152406045	152411911	L1PB1	+	LINE/L1	L1PB1	12.0121	0.464208	25.8767	2.61241e-06	Yes	-140826	ENSG00000169860	P2RY1
chr11	1289582	1289932	L1M5	-	LINE/L1	L1M5	31.2021	2.69977	11.5573	2.65292e-06	Yes	5670	ENSG00000078902	TOLLIP
chr1	205524118	205524497	MSTA	-	LTR/ERVL-MaLR	MSTA	34.9971	1.81141	19.3204	2.66073e-06	Yes	-13517	ENSG00000174514	MFSD4
chr15	90050119	90050428	AluSg4	+	SINE/Alu	AluSg4	1.97213	23.0741	-11.7001	2.69338e-06	Yes	-10276	ENSG00000140519	RHCG
chr16	74753850	74753940	L3	+	LINE/CR1	L3	9.13566	0.468056	19.5183	2.70618e-06	Yes	0	ENSG00000103089	FA2H
chr9	138686998	138687318	AluJb	+	SINE/Alu	AluJb	8.69629	0.584294	14.8834	2.70705e-06	Yes	2007	ENSG00000107147	KCNT1
chr6	80236289	80239331	HERVP71A-int|LTR71A	+	LTR/ERV1	HERVP71A-int	39.8157	1.98844	20.0236	2.72307e-06	Yes	0	ENSG00000135338	LCA5
chr19	7884088	7884713	MLT1G	+	LTR/ERVL-MaLR	MLT1G	7.44119	0.585652	12.7058	2.73327e-06	Yes	-10407	ENSG00000142459	EVI5L
chr19	35816689	35818374	L1MB8	-	LINE/L1	L1MB8	8.44857	0.428329	19.7245	2.73327e-06	Yes	0	ENSG00000012124	CD22
chr2	231777544	231777952	L1ME4b	-	LINE/L1	L1ME4b	4.62293	0.486805	9.49647	2.734e-06	Yes	0	ENSG00000135898	GPR55
chr15	79473050	79474026	Arthur1	+	DNA/hAT-Tip100	Arthur1	7.35188	0.464262	15.8356	2.74251e-06	Yes	-89936	ENSG00000058335	RASGRF1
chr19	13417360	13417779	MER74A	+	LTR/ERVL	MER74A	4.63413	0.468553	9.8903	2.82607e-06	Yes	0	ENSG00000141837	CACNA1A
chr19	28333235	28337841	HERVFH21-int|LTR21B	-	LTR/ERV1	HERVFH21-int	10.2394	0.618245	16.5621	2.84193e-06	Yes	1360333	ENSG00000169021	UQCRFS1
chr1	230932947	230933266	L1MC5a	-	LINE/L1	L1MC5a	20.0859	0.979308	20.5102	2.8517e-06	Yes	0	ENSG00000135773	CAPN9
chr1	46688892	46689183	AluJb	-	SINE/Alu	AluJb	11.6125	0.729482	15.9188	2.88308e-06	Yes	1960	ENSG00000171357	LURAP1
chr1	205523525	205524099	L1MB7	+	LINE/L1	L1MB7	19.2177	1.10955	17.3202	2.88308e-06	Yes	-13915	ENSG00000174514	MFSD4
chr11	67189676	67189952	AluSz	-	SINE/Alu	AluSz	28.8041	0.615472	46.8	2.88308e-06	Yes	0	ENSG00000172508	CARNS1
chr15	64656874	64657182	AluSx	-	SINE/Alu	AluSx	0.671314	13.0379	-19.4215	2.88308e-06	Yes	0	ENSG00000259316	CTD-2116N17.1
chr6	125581669	125581981	AluSx1	+	SINE/Alu	AluSx1	7.5616	0.515332	14.6733	2.88308e-06	Yes	0	ENSG00000111907	TPD52L1
chr6	150382405	150383491	L1PA16	-	LINE/L1	L1PA16	17.4752	95.4205	-5.46034	2.88308e-06	Yes	796	ENSG00000131019	ULBP3
chr14	101317364	101317491	MIRc	+	SINE/MIR	MIRc	176.221	6.27834	28.068	2.92862e-06	Yes	-21828	ENSG00000267918	AL117190.2
chr5	119375965	119376423	L4_C_Mam	-	LINE/RTE-X	L4_C_Mam	6.87111	0.484175	14.1914	2.92862e-06	Yes	403072	ENSG00000133835	HSD17B4
chr15	91858353	91858426	MIRb	+	SINE/MIR	MIRb	8.20541	0.425332	19.2918	2.96986e-06	Yes	13815	ENSG00000185518	SV2B
chr14	69997854	69997976	MSTD	-	LTR/ERVL-MaLR	MSTD	2.93773	0.428319	6.85874	2.97532e-06	Yes	2640	ENSG00000175985	PLEKHD1
chr5	178511590	178512539	MLT1F2|MLT1F2-int	+	LTR/ERVL-MaLR	MLT1F2-int	28.8359	137.462	-4.76704	2.98292e-06	Yes	1053	ENSG00000177932	ZNF354C
chr11	39989019	39990370	HUERS-P2-int|LTR1C1	+	LTR/ERV1	HUERS-P2-int	3.72719	0.4275	8.71857	3.00436e-06	Yes	145384	ENSG00000148948	LRRC4C
chr1	201861751	201861852	MIRb	+	SINE/MIR	MIRb	32.2343	3.27218	9.85102	3.01744e-06	Yes	318	ENSG00000198892	SHISA4
chr19	1385238	1385533	AluSp	+	SINE/Alu	AluSp	9.02398	0.598775	15.0707	3.01805e-06	Yes	0	ENSG00000115286	NDUFS7
chr16	70813254	70813544	L2c	+	LINE/L2	L2c	9.25894	0.638944	14.491	3.07915e-06	Yes	0	ENSG00000103043	VAC14
chr4	86926218	86926438	MIRb	+	SINE/MIR	MIRb	9.97965	0.648503	15.3887	3.0827e-06	Yes	2396	ENSG00000138639	ARHGAP24
chr19	13332037	13332333	AluSz6	-	SINE/Alu	AluSz6	6.05046	0.468207	12.9226	3.09343e-06	Yes	0	ENSG00000141837	CACNA1A
chr4	17484615	17485009	MLT1B	-	LTR/ERVL-MaLR	MLT1B	134.122	17.9036	7.49134	3.09343e-06	Yes	0	ENSG00000151552	QDPR
chr1	840949	841179	L1MB5	+	LINE/L1	L1MB5	0.997719	11.0288	-11.054	3.10952e-06	Yes	-19082	ENSG00000187634	SAMD11
chr16	14332004	14332645	L2a	-	LINE/L2	L2a	4.564	0.425747	10.72	3.24856e-06	Yes	0	ENSG00000186260	MKL2
chr4	187163110	187168738	LTR7|HERVH-int|HERVH-int|HERVH-int|LTR7	-	LTR/ERV1	HERVH-int	3.57233	0.42806	8.34539	3.25204e-06	Yes	0	ENSG00000164344	KLKB1
chr2	86124791	86126168	L1MEd	+	LINE/L1	L1MEd	6.99048	0.488739	14.3031	3.29232e-06	Yes	-8655	ENSG00000115525	ST3GAL5
chr19	39831524	39832273	L2	+	LINE/L2	L2	15.6628	0.818323	19.1401	3.33092e-06	Yes	0	ENSG00000130755	GMFG
chr3	106234261	106234743	L1MA7	+	LINE/L1	L1MA7	13.0541	0.661431	19.7361	3.33873e-06	Yes	-645866	ENSG00000114423	CBLB
chr6	3255981	3256690	HERV16-int	-	LTR/ERVL	HERV16-int	1.29389	18.7102	-14.4604	3.33873e-06	Yes	0	ENSG00000180822	PSMG4
chr1	35330290	35330448	MIRb	+	SINE/MIR	MIRb	86.9451	6.87561	12.6454	3.38507e-06	Yes	590	ENSG00000116544	DLGAP3
chr3	58403946	58404132	MIRb	-	SINE/MIR	MIRb	10.5541	0.530167	19.9072	3.40456e-06	Yes	0	ENSG00000168297	PXK
chr9	131201635	131201948	L2a	-	LINE/L2	L2a	19.198	1.12691	17.0359	3.40456e-06	Yes	2010	ENSG00000167123	CERCAM
chr20	1873431	1873680	L2b	+	LINE/L2	L2b	5.01461	0.463442	10.8204	3.4518e-06	Yes	-1475	ENSG00000198053	SIRPA
chr19	3782407	3782624	L2d2	-	LINE/L2	L2d2	52.8191	1.69608	31.1418	3.47063e-06	Yes	0	ENSG00000007264	MATK
chr1	25891832	25891941	L3	-	LINE/CR1	L3	5.74448	0.512687	11.2047	3.47115e-06	Yes	0	ENSG00000157978	LDLRAP1
chr9	138598849	138598982	FLAM_C	+	SINE/Alu	FLAM_C	7.96673	0.427414	18.6394	3.47115e-06	Yes	0	ENSG00000107147	KCNT1
chr12	49310952	49311276	AluJr	+	SINE/Alu	AluJr	36.009	2.66877	13.4928	3.47288e-06	Yes	0	ENSG00000272822	RP11-302B13.5
chr6	46117163	46118389	L1MEg	+	LINE/L1	L1MEg	30.0289	1.54638	19.4189	3.49355e-06	Yes	2728	ENSG00000001561	ENPP4
chr20	1912734	1913581	L2a	-	LINE/L2	L2a	13.0338	0.737324	17.6771	3.49981e-06	Yes	0	ENSG00000198053	SIRPA
chr11	29996294	29998877	HERVH-int|HERVH-int|HERVH-int	+	LTR/ERV1	HERVH-int	11.2161	0.715542	15.6749	3.50236e-06	Yes	32412	ENSG00000182255	KCNA4
chr10	3084750	3085175	L1ME1	+	LINE/L1	L1ME1	9.2398	0.601922	15.3505	3.50952e-06	Yes	-23351	ENSG00000067057	PFKP
chr6	33374904	33375206	AluJb	+	SINE/Alu	AluJb	0.536455	11.0451	-20.589	3.53441e-06	Yes	0	ENSG00000237649	KIFC1
chr13	79195316	79196303	Tigger6a	+	DNA/TcMar-Tigger	Tigger6a	23.9979	1.44965	16.5542	3.58525e-06	Yes	0	ENSG00000152193	RNF219
chr12	113829220	113829431	L2a	-	LINE/L2	L2a	180.555	41.5956	4.34073	3.6506e-06	Yes	820	ENSG00000135094	SDS
chr10	71170404	71170821	LTR47B2	+	LTR/ERVL	LTR47B2	40.99	3.42382	11.972	3.6623e-06	Yes	0	ENSG00000075073	TACR2
chr12	2290526	2291265	L3	+	LINE/CR1	L3	3.78951	0.427645	8.86135	3.6623e-06	Yes	0	ENSG00000151067	CACNA1C
chr3	16272402	16272833	L1PA8	+	LINE/L1	L1PA8	29.7211	1.86426	15.9425	3.6623e-06	Yes	0	ENSG00000131386	GALNT15
chr15	92930788	92931257	MLT1J	+	LTR/ERVL-MaLR	MLT1J	0.85602	10.0529	-11.7438	3.67496e-06	Yes	-5802	ENSG00000140557	ST8SIA2
chr15	92989746	92990640	L2a	-	LINE/L2	L2a	0.784162	10.0926	-12.8706	3.70017e-06	Yes	0	ENSG00000140557	ST8SIA2
chr3	170399547	170407095	LTR7|HERVH-int|HERVH-int|HERVH-int|HERVH-int|HERVH-int|LTR7	-	LTR/ERV1	HERVH-int	7.81908	0.425852	18.361	3.70601e-06	Yes	0	ENSG00000013297	CLDN11
chr6	40462248	40464610	L2a	+	LINE/L2	L2a	7.30739	0.545487	13.3961	3.70601e-06	Yes	0	ENSG00000156564	LRFN2
chr1	162420620	162421468	SVA_A	-	Retroposon/SVA	SVA_A	7.49325	0.46841	15.9972	3.75692e-06	Yes	-38693	ENSG00000198574	SH2D1B
chr20	31998294	31998715	L2a	+	LINE/L2	L2a	40.5619	5.15407	7.86987	3.81887e-06	Yes	0	ENSG00000101400	SNTA1
chr4	88395067	88395236	MER5B	+	DNA/hAT-Charlie	MER5B	8.74751	0.580433	15.0707	3.81887e-06	Yes	0	ENSG00000152583	SPARCL1
chr6	147162754	147162966	MIR	-	SINE/MIR	MIR	9.4995	0.506858	18.7419	3.81887e-06	Yes	26157	ENSG00000118492	ADGB
chr2	225825889	225826099	MER103C	+	DNA/hAT-Charlie	MER103C	7.7238	0.53077	14.552	3.86324e-06	Yes	0	ENSG00000135905	DOCK10
chr1	153576559	153578015	HUERS-P3b-int|LTR9B	+	LTR/ERV1	HUERS-P3b-int	40.3096	4.29713	9.38058	3.86509e-06	Yes	1348	ENSG00000188643	S100A16
chr14	101320490	101320662	L1ME4c	-	LINE/L1	L1ME4c	109.172	5.13648	21.2543	3.86509e-06	Yes	-24954	ENSG00000267918	AL117190.2
chr5	151108942	151110019	MER11B	-	LTR/ERVK	MER11B	83.4648	11.6016	7.19427	3.89565e-06	Yes	11859	ENSG00000177556	ATOX1
chr9	99909128	99911487	MSTA-int|MSTA|MSTA-int|MSTA|MSTA|MSTA-int	-	LTR/ERVL-MaLR	MSTA-int	10.8464	0.610154	17.7766	3.89565e-06	Yes	-89279	ENSG00000197816	CCDC180
chr10	91090718	91090909	LTR24B	-	LTR/ERV1	LTR24B	31.8367	2.2697	14.0268	3.97668e-06	Yes	0	ENSG00000107798	LIPA
chr3	185359773	185360542	Tigger1	+	DNA/TcMar-Tigger	Tigger1	0.789849	13.0388	-16.5079	3.99195e-06	Yes	986	ENSG00000073792	IGF2BP2
chrX	12748582	12749372	L1MA2	+	LINE/L1	L1MA2	29.8322	1.41943	21.0171	4.01921e-06	Yes	5941	ENSG00000169933	FRMPD4
chr1	36792693	36792850	L2a	-	LINE/L2	L2a	16.8804	1.38886	12.1541	4.04231e-06	Yes	0	ENSG00000116883	RP11-268J15.5
chr6	3250653	3251206	L2	-	LINE/L2	L2	1.15765	16.0865	-13.8958	4.04351e-06	Yes	0	ENSG00000180822	PSMG4
chr21	15250555	15252647	MSTA|MSTA-int|MSTA|MSTA|MSTA-int|MSTA-int	-	LTR/ERVL-MaLR	MSTA-int	4.74645	0.428319	11.0816	4.04522e-06	Yes	-197097	ENSG00000269011	AL050303.1
chr20	52570467	52570930	MLT1K|MLT1K	+	LTR/ERVL-MaLR	MLT1K	13.4318	0.835077	16.0845	4.12336e-06	Yes	0	ENSG00000064787	BCAS1
chr4	86924244	86924609	AluJb	-	SINE/Alu	AluJb	23.1077	1.18491	19.5016	4.15896e-06	Yes	422	ENSG00000138639	ARHGAP24
chr6	3257186	3257522	L2c	-	LINE/L2	L2c	1.52835	17.2318	-11.2748	4.15896e-06	Yes	0	ENSG00000180822	PSMG4
chr2	101998208	101998308	Charlie17a	+	DNA/hAT-Charlie	Charlie17a	78.469	4.62889	16.952	4.20437e-06	Yes	0	ENSG00000175874	CREG2
chr15	26002856	26004387	LTR10F|LTR10F|LTR10F|LTR10F|LTR10F|LTR10F|LTR10F|LTR10F|LTR10F|LTR10F	+	LTR/ERV1	LTR10F	5.31142	0.423788	12.5332	4.22926e-06	Yes	0	ENSG00000206190	ATP10A
chr12	23681460	23681632	MER5A	-	DNA/hAT-Charlie	MER5A	9.58578	84.9726	-8.86444	4.25806e-06	Yes	809	ENSG00000134532	SOX5
chr12	120079485	120079915	MER113	+	DNA/hAT-Charlie	MER113	8.50146	0.638578	13.3131	4.27669e-06	Yes	123	ENSG00000224982	TMEM233
chr1	40120999	40121248	Charlie15b	+	DNA/hAT-Charlie	Charlie15b	6.50389	0.532356	12.2172	4.33253e-06	Yes	3546	ENSG00000116981	NT5C1A
chr5	138891263	138891987	LTR12	+	LTR/ERV1	LTR12	7.3501	0.465391	15.7934	4.33253e-06	Yes	-14030	ENSG00000131508	UBE2D2
chr9	138603262	138603416	MIRb	+	SINE/MIR	MIRb	6.41986	0.42829	14.9895	4.33253e-06	Yes	0	ENSG00000107147	KCNT1
chr1	230933350	230933491	MIR3	-	SINE/MIR	MIR3	8.48716	0.585426	14.4974	4.33945e-06	Yes	0	ENSG00000135773	CAPN9
chr1	25884891	25885366	MLT1D	-	LTR/ERVL-MaLR	MLT1D	4.34553	0.469043	9.26467	4.36511e-06	Yes	0	ENSG00000157978	LDLRAP1
chr19	53017919	53018208	AluSg	-	SINE/Alu	AluSg	1.08551	12.8539	-11.8413	4.36511e-06	Yes	2513	ENSG00000258405	ZNF578
chr5	149647731	149648229	L2a	+	LINE/L2	L2a	5.19625	0.425999	12.1978	4.36511e-06	Yes	0	ENSG00000070808	CAMK2A
chr7	63841232	63842296	MER11C	+	LTR/ERVK	MER11C	50.2997	8.4894	5.92501	4.36511e-06	Yes	25995	ENSG00000234444	ZNF736
chr9	124704410	124704855	L2a	+	LINE/L2	L2a	4.15994	0.468084	8.88715	4.36511e-06	Yes	0	ENSG00000175764	TTLL11
chr6	136659394	136659697	AluSz	-	SINE/Alu	AluSz	22.5274	0.991871	22.712	4.37792e-06	Yes	4179	ENSG00000135525	MAP7
chr4	21603065	21603594	L2a	+	LINE/L2	L2a	7.99187	0.544688	14.6724	4.49089e-06	Yes	0	ENSG00000185774	KCNIP4
chr9	131200694	131200809	MIR3	+	SINE/MIR	MIR3	31.6327	2.1697	14.5793	4.50679e-06	Yes	1069	ENSG00000167123	CERCAM
chr5	175489194	175489516	AluYm1	+	SINE/Alu	AluYm1	5.98977	0.510733	11.7278	4.57472e-06	Yes	0	ENSG00000182230	FAM153B
chr2	201262583	201262967	LTR16B	-	LTR/ERVL	LTR16B	6.50201	0.540504	12.0295	4.59459e-06	Yes	0	ENSG00000196141	SPATS2L
chr19	38741228	38741508	L2c	+	LINE/L2	L2c	7.60918	0.510558	14.9037	4.60815e-06	Yes	0	ENSG00000167642	SPINT2
chr1	31650962	31651337	AluSx1	+	SINE/Alu	AluSx1	0.627082	7.19729	-11.4774	4.63261e-06	Yes	1256	ENSG00000084628	NKAIN1
chr4	88396194	88396756	L2	+	LINE/L2	L2	7.77504	0.505532	15.3799	4.68036e-06	Yes	0	ENSG00000152583	SPARCL1
chr16	23938257	23939356	L2c	-	LINE/L2	L2c	3.08193	0.428173	7.19787	4.72014e-06	Yes	0	ENSG00000166501	PRKCB
chr3	42824273	42824799	L1M7	+	LINE/L1	L1M7	66.6257	8.36833	7.96165	4.73631e-06	Yes	0	ENSG00000181061	HIGD1A
chr8	95860544	95861013	L1MB8	-	LINE/L1	L1MB8	11.1708	0.732049	15.2596	4.73631e-06	Yes	0	ENSG00000164941	INTS8
chr22	38127154	38127448	AluJb	-	SINE/Alu	AluJb	0.7218	10.867	-15.0554	4.73867e-06	Yes	0	ENSG00000100101	NOL12
chr4	17486579	17486895	L1MB5	+	LINE/L1	L1MB5	63.8008	5.54895	11.4978	4.85386e-06	Yes	0	ENSG00000151552	QDPR
chr9	108113533	108113843	AluSz6	+	SINE/Alu	AluSz6	13.4749	0.689332	19.5477	4.89855e-06	Yes	0	ENSG00000070214	SLC44A1
chr12	300873	301127	MLT1L	+	LTR/ERVL-MaLR	MLT1L	9.80506	0.675328	14.519	4.91062e-06	Yes	0	ENSG00000111181	SLC6A12
chr15	56365299	56365585	AluSx1	-	SINE/Alu	AluSx1	2.16305	19.4567	-8.99505	4.91062e-06	Yes	13894	ENSG00000181827	RFX7
chr1	38374262	38378647	HERVH-int|HERVH-int|HERVH-int|HERVH-int|HERVH-int	+	LTR/ERV1	HERVH-int	35.5739	1.04985	33.8846	4.92868e-06	Yes	0	ENSG00000204084	INPP5B
chr6	33375207	33375720	L1MC5a	-	LINE/L1	L1MC5a	0.624516	13.9494	-22.3364	4.94562e-06	Yes	0	ENSG00000237649	KIFC1
chr14	62599739	62599883	MER5A1	-	DNA/hAT-Charlie	MER5A1	46.0771	3.97831	11.5821	4.94835e-06	Yes	31309	ENSG00000139973	SYT16
chr3	117599055	117600149	L2	+	LINE/L2	L2	5.7597	0.496524	11.6	4.95673e-06	Yes	0	ENSG00000185565	LSAMP
chr8	107572953	107579352	L1PA7	+	LINE/L1	L1PA7	9.36311	0.55546	16.8565	4.95673e-06	Yes	0	ENSG00000164830	OXR1
chr1	40118619	40118744	MER91C	+	DNA/hAT-Tip100	MER91C	13.3474	0.737245	18.1044	4.97179e-06	Yes	6050	ENSG00000116981	NT5C1A
chr11	75139917	75140115	MIRb	-	SINE/MIR	MIRb	2.83384	25.9192	-9.14631	5.09031e-06	Yes	0	ENSG00000149243	KLHL35
chr11	124794246	124794465	MIR	+	SINE/MIR	MIR	14.8505	0.898032	16.5367	5.09031e-06	Yes	0	ENSG00000165478	HEPACAM
chr4	21460224	21462021	L2a	+	LINE/L2	L2a	12.8457	0.643398	19.9654	5.09031e-06	Yes	0	ENSG00000185774	KCNIP4
chr6	158521802	158522772	L1MC4	-	LINE/L1	L1MC4	25.5532	1.95891	13.0446	5.09031e-06	Yes	1595	ENSG00000078269	SYNJ2
chr6	33904599	33905019	MLT1J	+	LTR/ERVL-MaLR	MLT1J	4.71127	0.466323	10.103	5.11032e-06	Yes	84610	ENSG00000124493	GRM4
chr15	90049556	90049991	MLT2B4	+	LTR/ERVL	MLT2B4	3.43566	39.2521	-11.4249	5.12071e-06	Yes	-9713	ENSG00000140519	RHCG
chr3	127875294	127877653	Tigger1	+	DNA/TcMar-Tigger	Tigger1	0.933544	10.5773	-11.3302	5.12343e-06	Yes	0	ENSG00000132394	EEFSEC
chr14	68030123	68030448	AluSx	-	SINE/Alu	AluSx	11.4171	0.734711	15.5396	5.17105e-06	Yes	0	ENSG00000054690	PLEKHH1
chr17	3401642	3401940	AluJo	-	SINE/Alu	AluJo	6.99468	0.428313	16.3308	5.19714e-06	Yes	0	ENSG00000141255	SPATA22
chr22	38435383	38435455	MIRc	-	SINE/MIR	MIRc	5.66693	0.487904	11.6148	5.19714e-06	Yes	0	ENSG00000100142	POLR2F
chr11	134148692	134149099	L1MD	-	LINE/L1	L1MD	14.4389	0.939774	15.3643	5.23368e-06	Yes	0	ENSG00000166105	GLB1L3
chr12	110498892	110499337	L2	+	LINE/L2	L2	5.99173	0.489261	12.2465	5.23695e-06	Yes	0	ENSG00000174456	C12orf76
chr10	49682941	49683982	L2c	+	LINE/L2	L2c	6.36374	0.50935	12.4938	5.24535e-06	Yes	0	ENSG00000128805	ARHGAP22
chr14	29263318	29263599	AluJb	-	SINE/Alu	AluJb	17.3614	98.3571	-5.66528	5.29147e-06	Yes	0	ENSG00000186960	C14orf23
chr5	161429256	161429566	AluSq2	+	SINE/Alu	AluSq2	15.6558	0.625338	25.0357	5.29147e-06	Yes	-64981	ENSG00000113327	GABRG2
chr1	45097006	45097247	L2d2	-	LINE/L2	L2d2	8.01027	0.488636	16.3931	5.29207e-06	Yes	0	ENSG00000187147	RNF220
chr20	45072265	45072727	LTR75_1	+	LTR/ERV1	LTR75_1	19.1509	1.3838	13.8394	5.29207e-06	Yes	-10562	ENSG00000062598	ELMO2
chr1	67389853	67390154	AluSx	-	SINE/Alu	AluSx	4.02553	25.289	-6.28216	5.33244e-06	Yes	0	ENSG00000152763	WDR78
chr13	42040534	42040825	AluSx	-	SINE/Alu	AluSx	8.75401	0.552958	15.8312	5.33244e-06	Yes	0	ENSG00000102760	RGCC
chr1	247198498	247198800	LTR53	-	LTR/ERVL	LTR53	5.38823	33.8801	-6.28779	5.37676e-06	Yes	0	ENSG00000135747	ZNF670
chr10	88446291	88446593	AluJr	+	SINE/Alu	AluJr	8.10318	0.428289	18.9199	5.39107e-06	Yes	0	ENSG00000122367	LDB3
chr15	91848396	91848651	LTR88a	+	LTR/Gypsy?	LTR88a	7.12314	0.465462	15.3034	5.39107e-06	Yes	3858	ENSG00000185518	SV2B
chr15	65343173	65343481	AluSx	-	SINE/Alu	AluSx	6.65666	0.560025	11.8864	5.42672e-06	Yes	0	ENSG00000186198	SLC51B
chr17	76231372	76231666	AluSp	-	SINE/Alu	AluSp	7.64643	0.500987	15.2627	5.43855e-06	Yes	0	ENSG00000204278	TMEM235
chr19	53016275	53016573	AluSp	-	SINE/Alu	AluSp	3.94999	24.2882	-6.14892	5.47418e-06	Yes	869	ENSG00000258405	ZNF578
chr12	113829033	113829152	MIRb	+	SINE/MIR	MIRb	201.225	42.7346	4.70871	5.49392e-06	Yes	1099	ENSG00000135094	SDS
chr6	97067029	97067333	AluYk3	+	SINE/Alu	AluYk3	11.824	0.730254	16.1916	5.52554e-06	Yes	2518	ENSG00000112214	FHL5
chr1	60354050	60356325	THE1B|THE1B-int|THE1B	-	LTR/ERVL-MaLR	THE1B-int	10.9913	0.650762	16.89	5.6367e-06	Yes	2656	ENSG00000134716	CYP2J2
chr18	72255454	72255771	Tigger3a	+	DNA/TcMar-Tigger	Tigger3a	9.41353	0.510851	18.4271	5.64037e-06	Yes	1007	ENSG00000150656	CNDP1
chr3	39565282	39565441	MIRc	+	SINE/MIR	MIRc	7.83641	0.427523	18.3298	5.68245e-06	Yes	0	ENSG00000168314	MOBP
chrX	37339302	37344090	HERVIP10FH-int|LTR10F	+	LTR/ERV1	HERVIP10FH-int	16.2091	0.771861	21.0001	5.69032e-06	Yes	0	ENSG00000250349	TM4SF2
chr10	46968308	46968442	MIRb	+	SINE/MIR	MIRb	78.6551	7.05759	11.1448	5.73347e-06	Yes	0	ENSG00000204176	SYT15
chr6	136662432	136662579	FLAM_C	-	SINE/Alu	FLAM_C	7.12881	0.468523	15.2155	5.73529e-06	Yes	1297	ENSG00000135525	MAP7
chr5	175301583	175302412	L2b	-	LINE/L2	L2b	11.465	0.779934	14.7	5.77445e-06	Yes	0	ENSG00000145920	CPLX2
chr18	51678309	51678782	L2c	-	LINE/L2	L2c	53.8591	9.63118	5.59216	5.82252e-06	Yes	298	ENSG00000134046	MBD2
chr17	36701726	36701911	MIR3	-	SINE/MIR	MIR3	5.01273	0.512841	9.77443	5.85225e-06	Yes	0	ENSG00000017373	SRCIN1
chr6	6344231	6344538	MamGypsy2-I	+	LTR/Gypsy	MamGypsy2-I	6.16064	0.428115	14.3902	5.86327e-06	Yes	-22986	ENSG00000124491	F13A1
chr11	118516697	118517002	AluY	+	SINE/Alu	AluY	9.16708	0.703298	13.0344	5.89125e-06	Yes	0	ENSG00000019144	PHLDB1
chr2	2827876	2828774	MLT1B-int|MLT1B	-	LTR/ERVL-MaLR	MLT1B-int	11.2951	0.796388	14.1829	5.93142e-06	Yes	363923	ENSG00000032389	TSSC1
chr2	101999695	101999872	MIRb	-	SINE/MIR	MIRb	27.8094	1.73327	16.0444	5.93309e-06	Yes	0	ENSG00000175874	CREG2
chr19	48585746	48586054	AluSx1	-	SINE/Alu	AluSx1	7.43182	0.427422	17.3875	5.96609e-06	Yes	0	ENSG00000105499	PLA2G4C
chr19	13332381	13332670	L2a	+	LINE/L2	L2a	5.69591	0.511757	11.1301	6.00824e-06	Yes	0	ENSG00000141837	CACNA1A
chr5	87724414	87724624	MIR	+	SINE/MIR	MIR	0.927998	10.7086	-11.5395	6.05478e-06	Yes	-159122	ENSG00000164180	TMEM161B
chr2	2240589	2240885	AluSp	-	SINE/Alu	AluSp	4.14002	0.468345	8.83969	6.09794e-06	Yes	0	ENSG00000186487	MYT1L
chr11	50167205	50168028	LTR8B	+	LTR/ERV1	LTR8B	4.54518	0.427079	10.6425	6.19526e-06	Yes	-163135	ENSG00000221954	OR4C12
chr12	50285757	50286916	L2	+	LINE/L2	L2	11.1085	0.876761	12.67	6.19564e-06	Yes	0	ENSG00000135472	FAIM2
chr12	49311426	49311593	MIR3	-	SINE/MIR	MIR3	34.2848	1.87483	18.2869	6.20188e-06	Yes	0	ENSG00000272822	RP11-302B13.5
chr14	68036149	68036222	L3	-	LINE/CR1	L3	11.4513	0.668702	17.1246	6.23719e-06	Yes	0	ENSG00000054690	PLEKHH1
chr3	197754239	197754806	L1MB4	-	LINE/L1	L1MB4	4.05457	0.428298	9.46669	6.23719e-06	Yes	0	ENSG00000185621	LMLN
chr12	121627450	121627938	LTR53	+	LTR/ERVL	LTR53	19.3227	1.33561	14.4673	6.27573e-06	Yes	3575	ENSG00000089041	P2RX7
chr4	118566649	118571015	L1PA16	-	LINE/L1	L1PA16	43.4819	1.42448	30.5248	6.28223e-06	Yes	-383759	ENSG00000164100	NDST3
chr1	226030855	226031106	L2c	-	LINE/L2	L2c	34.1079	2.27964	14.962	6.28556e-06	Yes	0	ENSG00000143819	EPHX1
chr5	123639451	123645169	LTR7|HERVH-int|HERVH-int|HERVH-int|HERVH-int|HERVH-int|LTR7	+	LTR/ERV1	HERVH-int	6.27042	0.55819	11.2335	6.33424e-06	Yes	327440	ENSG00000168916	ZNF608
chr16	27685534	27686394	MLT1D|MLT1D-int	-	LTR/ERVL-MaLR	MLT1D-int	5.46387	0.46875	11.6563	6.36375e-06	Yes	0	ENSG00000047578	KIAA0556
chr19	34879101	34879394	AluSz	+	SINE/Alu	AluSz	12.1198	0.633338	19.1364	6.36443e-06	Yes	0	ENSG00000105220	GPI
chr20	39938260	39939038	L2	+	LINE/L2	L2	6.07114	0.584229	10.3917	6.48368e-06	Yes	0	ENSG00000174306	ZHX3
chr21	34019229	34021593	L2b	+	LINE/L2	L2b	7.42051	0.579202	12.8116	6.48368e-06	Yes	0	ENSG00000159082	SYNJ1
chr6	84851892	84855898	MER34B-int	+	LTR/ERV1	MER34B-int	17.5073	1.51938	11.5227	6.49649e-06	Yes	0	ENSG00000135315	KIAA1009
chr8	89728882	89730743	L1M3	+	LINE/L1	L1M3	20.5071	2.30363	8.90206	6.49685e-06	Yes	-388629	ENSG00000156103	MMP16
chr1	36792131	36792685	L2a	-	LINE/L2	L2a	26.4338	2.81359	9.39501	6.52355e-06	Yes	0	ENSG00000116883	RP11-268J15.5
chr20	47272908	47273441	L2a	+	LINE/L2	L2a	4.77365	0.464314	10.2811	6.7393e-06	Yes	0	ENSG00000124126	PREX1
chr4	88404241	88408040	L1PA7	-	LINE/L1	L1PA7	27.4726	1.88487	14.5753	6.74149e-06	Yes	0	ENSG00000152583	SPARCL1
chr11	12270439	12270634	MIRb	+	SINE/MIR	MIRb	5.12901	0.428318	11.9748	6.83202e-06	Yes	0	ENSG00000133816	MICAL2
chr15	85650340	85650855	L2c	-	LINE/L2	L2c	6.6465	0.511542	12.9931	6.85325e-06	Yes	0	ENSG00000073417	PDE8A
chr6	152811474	152816574	LTR7C|HERVH-int|HERVH-int|HERVH-int|HERVH-int	+	LTR/ERV1	HERVH-int	14.9747	0.771526	19.4091	6.8652e-06	Yes	0	ENSG00000131018	SYNE1
chr11	93915857	93915933	L2c	-	LINE/L2	L2c	10.4439	108.073	-10.3479	6.99894e-06	Yes	720	ENSG00000110218	PANX1
chr8	53287721	53288955	L2d	+	LINE/L2	L2d	7.46032	0.466173	16.0033	7.05093e-06	Yes	0	ENSG00000147488	ST18
chr10	68836618	68837578	L2a	+	LINE/L2	L2a	4.18514	0.468525	8.9326	7.07989e-06	Yes	0	ENSG00000183230	CTNNA3
chr12	52405699	52406047	MSTB2	-	LTR/ERVL-MaLR	MSTB2	7.68139	0.602205	12.7554	7.07989e-06	Yes	0	ENSG00000161835	GRASP
chr12	111387777	111389721	SVA_D	-	Retroposon/SVA	SVA_D	7.35124	0.56994	12.8983	7.12926e-06	Yes	-29252	ENSG00000111245	MYL2
chr15	80801818	80802662	L2a	-	LINE/L2	L2a	13.1767	0.970449	13.5779	7.13733e-06	Yes	0	ENSG00000172379	ARNT2
chr16	67206235	67206529	AluSx3	+	SINE/Alu	AluSx3	15.0618	0.873533	17.2424	7.13733e-06	Yes	0	ENSG00000140939	NOL3
chr11	58813122	58813603	L1ME3G	-	LINE/L1	L1ME3G	0.797219	8.67805	-10.8854	7.13753e-06	Yes	2123	ENSG00000166840	GLYATL1
chr12	111385445	111385941	MLT1D	-	LTR/ERVL-MaLR	MLT1D	11.2297	0.590751	19.0093	7.13753e-06	Yes	-26920	ENSG00000111245	MYL2
chr7	130733818	130734394	L2a	+	LINE/L2	L2a	5.57953	0.509699	10.9467	7.13753e-06	Yes	-60462	ENSG00000128585	MKLN1
chr3	193117366	193117656	AluY	+	SINE/Alu	AluY	21.3504	1.39721	15.2807	7.22958e-06	Yes	2211	ENSG00000127249	ATP13A4
chr1	205032472	205032785	AluSx	+	SINE/Alu	AluSx	8.97674	0.582791	15.403	7.38163e-06	Yes	0	ENSG00000184144	CNTN2
chr11	65518437	65519382	L1MC1	-	LINE/L1	L1MC1	13.8432	0.59018	23.4559	7.38163e-06	Yes	23983	ENSG00000254470	AP5B1
chr20	37474256	37475174	L2	-	LINE/L2	L2	8.39888	0.6086	13.8003	7.38163e-06	Yes	0	ENSG00000101445	PPP1R16B
chr9	114313675	114313981	AluSx	-	SINE/Alu	AluSx	77.1701	14.1399	5.45761	7.45414e-06	Yes	0	ENSG00000173258	ZNF483
chr3	39553100	39553259	L2b	+	LINE/L2	L2b	7.51252	0.427631	17.5678	7.49256e-06	Yes	0	ENSG00000168314	MOBP
chr9	109616493	109616688	MIR	-	SINE/MIR	MIR	1.16815	13.6723	-11.7042	7.5374e-06	Yes	-8691	ENSG00000148143	ZNF462
chr22	28318689	28318991	AluY	-	SINE/Alu	AluY	2.27437	17.2998	-7.6064	7.57062e-06	Yes	-2568	ENSG00000180957	PITPNB
chr3	167548464	167549951	L1ME1	-	LINE/L1	L1ME1	15.5001	1.20307	12.8838	7.57062e-06	Yes	5109	ENSG00000163536	SERPINI1
chr16	5027168	5027477	AluSx1	+	SINE/Alu	AluSx1	8.66654	0.510859	16.9646	7.5969e-06	Yes	0	ENSG00000103184	SEC14L5
chr10	88801415	88801658	L1M4	-	LINE/L1	L1M4	18.9603	1.57381	12.0473	7.5984e-06	Yes	8586	ENSG00000148672	GLUD1
chr4	79605201	79605542	L2a	+	LINE/L2	L2a	14.8093	0.891595	16.6099	7.6261e-06	Yes	73605	ENSG00000138772	ANXA3
chr9	108167626	108168739	L1MB5	+	LINE/L1	L1MB5	11.4294	0.668656	17.0931	7.6261e-06	Yes	0	ENSG00000070214	SLC44A1
chr9	138600393	138600684	AluJb	-	SINE/Alu	AluJb	6.15131	0.427765	14.3801	7.6786e-06	Yes	0	ENSG00000107147	KCNT1
chr9	139662581	139662880	L1ME1	+	LINE/L1	L1ME1	4.03762	0.428078	9.43197	7.69231e-06	Yes	-1875	ENSG00000177984	LCN15
chr15	42700204	42700331	MIRc	-	SINE/MIR	MIRc	17.8105	0.60471	29.453	7.70894e-06	Yes	0	ENSG00000092529	CAPN3
chr14	36625651	36631893	L1PA7	-	LINE/L1	L1PA7	21.9194	1.18377	18.5167	7.71233e-06	Yes	135878	ENSG00000151332	MBIP
chr17	46026106	46026239	Tigger19a	-	DNA/TcMar-Tigger	Tigger19a	125.321	19.3694	6.47004	7.71233e-06	Yes	453	ENSG00000108439	PNPO
chr1	247262952	247263181	AluSc5	-	SINE/Alu	AluSc5	13.7787	57.5911	-4.17972	7.7433e-06	Yes	84	ENSG00000188295	ZNF669
chr11	93916722	93916793	Charlie4z	-	DNA/hAT-Charlie	Charlie4z	11.2705	119.31	-10.586	7.80053e-06	Yes	1585	ENSG00000110218	PANX1
chr15	30240700	30241033	MLT1L	+	LTR/ERVL-MaLR	MLT1L	3.79413	0.427958	8.86565	7.8335e-06	Yes	0	ENSG00000104067	TJP1
chr19	1386246	1386498	MLT1B	-	LTR/ERVL-MaLR	MLT1B	10.2713	0.654649	15.6898	7.8335e-06	Yes	0	ENSG00000115286	NDUFS7
chr20	5281867	5282176	AluSx1	-	SINE/Alu	AluSx1	8.63907	90.3829	-10.4621	7.8335e-06	Yes	142	ENSG00000101292	PROKR2
chr9	92093740	92094261	MLT1G	-	LTR/ERVL-MaLR	MLT1G	5.58097	0.556191	10.0343	7.8335e-06	Yes	0	ENSG00000187764	SEMA4D
chr16	955909	956242	L1M5	-	LINE/L1	L1M5	3.25459	0.427848	7.60688	7.96587e-06	Yes	0	ENSG00000103227	LMF1
chr14	94737285	94740124	L1MC1	+	LINE/L1	L1MC1	9.86855	0.605088	16.3093	7.96624e-06	Yes	0	ENSG00000119698	PPP4R4
chr2	218707829	218709187	L2c	+	LINE/L2	L2c	10.9679	0.725175	15.1245	7.96624e-06	Yes	0	ENSG00000079308	TNS1
chr9	33585655	33587899	MSTA-int|MSTA|MSTA|MSTA-int|MSTA	+	LTR/ERVL-MaLR	MSTA-int	7.97107	0.626456	12.7241	7.96624e-06	Yes	12649	ENSG00000230453	ANKRD18B
chr4	17487789	17487895	MIR3	+	SINE/MIR	MIR3	45.0438	6.68061	6.74246	8.01777e-06	Yes	0	ENSG00000151552	QDPR
chr8	27313688	27314818	Tigger1	+	DNA/TcMar-Tigger	Tigger1	4.65709	0.428197	10.876	8.01777e-06	Yes	0	ENSG00000120899	PTK2B
chr8	143576775	143577216	MLT1C2	-	LTR/ERVL-MaLR	MLT1C2	6.12043	0.464207	13.1847	8.11166e-06	Yes	0	ENSG00000181790	BAI1
chr21	46965089	46965495	MSTB	+	LTR/ERVL-MaLR	MSTB	4.89474	0.512198	9.55635	8.12763e-06	Yes	-765	ENSG00000173638	SLC19A1
chr11	64456284	64456427	L2d2	+	LINE/L2	L2d2	9.06471	0.683838	13.2556	8.13036e-06	Yes	0	ENSG00000110076	NRXN2
chr1	247199673	247199971	AluJr	+	SINE/Alu	AluJr	4.0668	27.9897	-6.88249	8.15585e-06	Yes	0	ENSG00000135747	ZNF670
chr14	93928726	93929899	L2c	-	LINE/L2	L2c	24.8797	1.34642	18.4784	8.15585e-06	Yes	0	ENSG00000133958	UNC79
chr4	24324907	24329833	LTR7Y|HERVH-int|HERVH-int|HERVH-int|HERVH-int|HERVH-int|HERVH-int|LTR7Y	+	LTR/ERV1	HERVH-int	10.2995	0.670067	15.3708	8.15585e-06	Yes	189232	ENSG00000109606	DHX15
chr2	127815721	127815884	MIRb	+	SINE/MIR	MIRb	20.519	1.00328	20.4518	8.17469e-06	Yes	0	ENSG00000136717	BIN1
chr22	27753175	27753631	MLT1A	+	LTR/ERVL-MaLR	MLT1A	8.89456	0.666192	13.3513	8.17469e-06	Yes	390635	ENSG00000169184	MN1
chr15	20616750	20622251	L1PA4	-	LINE/L1	L1PA4	10.6808	0.469837	22.7329	8.30397e-06	Yes	114844	ENSG00000215405	GOLGA6L6
chr12	120079978	120080282	AluSz	+	SINE/Alu	AluSz	8.94412	0.638195	14.0147	8.3092e-06	Yes	616	ENSG00000224982	TMEM233
chr17	57507853	57508161	AluSx3	-	SINE/Alu	AluSx3	7.27941	0.586709	12.4072	8.40587e-06	Yes	28764	ENSG00000175155	YPEL2
chr21	15231230	15233333	MSTA|MSTA-int|MSTA|MSTA|MSTA-int|MSTA-int	-	LTR/ERVL-MaLR	MSTA-int	4.88171	0.467914	10.4329	8.40587e-06	Yes	-177772	ENSG00000269011	AL050303.1
chrX	53298586	53299475	L2a	+	LINE/L2	L2a	4.91184	0.509308	9.64415	8.40587e-06	Yes	0	ENSG00000124313	IQSEC2
chrX	152583322	152583543	LTR104_Mam	-	LTR/Gypsy	LTR104_Mam	12.0542	0.819298	14.7128	8.40587e-06	Yes	-16071	ENSG00000063587	ZNF275
chr10	20360995	20361327	AluSp	+	SINE/Alu	AluSp	10.9241	0.705591	15.4822	8.44623e-06	Yes	0	ENSG00000120594	PLXDC2
chr6	46118390	46118725	AluSc	-	SINE/Alu	AluSc	19.3249	1.6947	11.4032	8.44623e-06	Yes	3955	ENSG00000001561	ENPP4
chr1	24801219	24801522	AluSc	+	SINE/Alu	AluSc	29.3355	3.19901	9.17016	8.45785e-06	Yes	1754	ENSG00000001461	NIPAL3
chr11	124794071	124794157	L2c	-	LINE/L2	L2c	13.1248	0.771785	17.0057	8.46626e-06	Yes	0	ENSG00000165478	HEPACAM
chr2	11565424	11566766	HERVH48-int|MER48	+	LTR/ERV1	HERVH48-int	5.95218	0.534479	11.1364	8.46626e-06	Yes	17736	ENSG00000169016	E2F6
chr2	95884742	95885052	AluYk2	-	SINE/Alu	AluYk2	1.24629	13.9558	-11.1979	8.47874e-06	Yes	34678	ENSG00000163067	ZNF2
chr20	47546912	47547861	L2c	-	LINE/L2	L2c	11.528	0.766626	15.0374	8.51218e-06	Yes	0	ENSG00000124198	ARFGEF2
chr1	201869952	201870215	L3b	+	LINE/CR1	L3b	12.0971	0.98772	12.2475	8.59973e-06	Yes	0	ENSG00000163431	LMOD1
chr1	226028206	226028433	LTR37A	-	LTR/ERV1	LTR37A	13.6339	0.910424	14.9754	8.70066e-06	Yes	0	ENSG00000143819	EPHX1
chr18	14994009	14994286	AluYk2	+	SINE/Alu	AluYk2	5.84045	0.533677	10.9438	8.74607e-06	Yes	141273	ENSG00000180777	ANKRD30B
chr16	88749668	88749961	AluSg	-	SINE/Alu	AluSg	19.8753	1.98958	9.98971	8.74669e-06	Yes	0	ENSG00000185669	SNAI3
chr3	26758047	26758502	LTR16C	+	LTR/ERVL	LTR16C	18.321	82.3951	-4.4973	8.74669e-06	Yes	5781	ENSG00000179796	LRRC3B
chr19	7885171	7886438	L1MB4	+	LINE/L1	L1MB4	12.8968	0.812492	15.8732	8.90135e-06	Yes	-8682	ENSG00000142459	EVI5L
chr19	46927861	46928556	Charlie15b	-	DNA/hAT-Charlie	Charlie15b	494.893	112.32	4.40608	8.93306e-06	Yes	-11021	ENSG00000169515	CCDC8
chr19	46529281	46530232	L2	+	LINE/L2	L2	13.6895	0.71962	19.0232	8.95472e-06	Yes	-2959	ENSG00000008438	PGLYRP1
chr1	48978917	48985928	MER9a1|HERVK9-int|MER9a1	-	LTR/ERVK	HERVK9-int	25.2504	1.64797	15.3221	9.00744e-06	Yes	12600	ENSG00000186094	AGBL4
chr18	14996280	14996587	AluJb	-	SINE/Alu	AluJb	10.7654	0.691593	15.5662	9.02116e-06	Yes	143544	ENSG00000180777	ANKRD30B
chr8	38604546	38605562	L1MC1	+	LINE/L1	L1MC1	28.5215	2.56643	11.1133	9.03763e-06	Yes	0	ENSG00000147526	TACC1
chr12	121081847	121082102	MIRb	+	SINE/MIR	MIRb	4.24756	0.487907	8.70566	9.10069e-06	Yes	0	ENSG00000157782	CABP1
chr2	39830104	39831541	L1MC4	-	LINE/L1	L1MC4	17.6608	1.34416	13.1389	9.10069e-06	Yes	-60582	ENSG00000152154	TMEM178A
chr5	146361639	146362739	L1MDa	-	LINE/L1	L1MDa	3.8955	0.427094	9.12094	9.10069e-06	Yes	0	ENSG00000156475	PPP2R2B
chr8	67348667	67349676	L2a	-	LINE/L2	L2a	11.1694	0.8638	12.9306	9.10069e-06	Yes	0	ENSG00000147576	ADHFE1
chr10	46968952	46969116	MIRb	+	SINE/MIR	MIRb	107.889	9.27224	11.6357	9.16922e-06	Yes	0	ENSG00000204176	SYT15
chr3	170389966	170396051	LTR7|HERVH-int|HERVH-int|HERVH-int|HERVH-int|LTR7	-	LTR/ERV1	HERVH-int	5.78651	0.514077	11.2561	9.16922e-06	Yes	0	ENSG00000013297	CLDN11
chrX	103044886	103044993	MIR1_Amn	-	SINE/MIR	MIR1_Amn	7.10479	0.468055	15.1794	9.16922e-06	Yes	0	ENSG00000123560	PLP1
chr13	111841561	111851459	LTR12|HERV9-int|LTR12	-	LTR/ERV1	HERV9-int	18.6641	1.72408	10.8255	9.18017e-06	Yes	0	ENSG00000102606	ARHGEF7
chr9	138601534	138601826	AluSx	-	SINE/Alu	AluSx	9.61576	0.507472	18.9484	9.25301e-06	Yes	0	ENSG00000107147	KCNT1
chr12	121623882	121624155	MLT1G	+	LTR/ERVL-MaLR	MLT1G	46.0336	4.839	9.51303	9.27938e-06	Yes	7	ENSG00000089041	P2RX7
chr14	102303465	102303783	AluSp	-	SINE/Alu	AluSp	24.2672	3.55943	6.81772	9.35699e-06	Yes	0	ENSG00000078304	PPP2R5C
chr15	65336792	65337096	AluSc8	+	SINE/Alu	AluSc8	11.7696	0.902236	13.0449	9.35699e-06	Yes	-613	ENSG00000186198	SLC51B
chr4	17482643	17482942	L2a	+	LINE/L2	L2a	14.7067	1.36479	10.7758	9.35699e-06	Yes	0	ENSG00000151552	QDPR
chr17	57507238	57507504	AluSz	-	SINE/Alu	AluSz	9.84327	0.692305	14.2181	9.59257e-06	Yes	28149	ENSG00000175155	YPEL2
chr22	45272751	45273099	LTR41B	-	LTR/ERVL	LTR41B	1.57748	16.4757	-10.4444	9.59257e-06	Yes	3944	ENSG00000056487	PHF21B
chr2	91778820	91779129	AluJr	-	SINE/Alu	AluJr	6.05645	0.533699	11.3481	9.6311e-06	Yes	-1240424	ENSG00000228325	RP11-685N3.1
chr12	111386557	111387011	L1ME1	-	LINE/L1	L1ME1	2.98794	0.428188	6.9781	9.66347e-06	Yes	-28032	ENSG00000111245	MYL2
chr11	116765738	116766145	L2a	+	LINE/L2	L2a	5.15311	0.512167	10.0614	9.72345e-06	Yes	0	ENSG00000160584	SIK3
chr5	45255497	45255634	MER5A1	-	DNA/hAT-Charlie	MER5A1	23.9116	1.64211	14.5616	9.72345e-06	Yes	3716	ENSG00000164588	HCN1
chr22	45270728	45272750	L1MEf	+	LINE/L1	L1MEf	1.21802	13.4623	-11.0525	9.72842e-06	Yes	4293	ENSG00000056487	PHF21B
chr14	101319925	101320152	L1ME4c	-	LINE/L1	L1ME4c	82.8561	3.45334	23.993	9.73248e-06	Yes	-24389	ENSG00000267918	AL117190.2
chr6	3253638	3255060	LTR12C	+	LTR/ERV1	LTR12C	3.71414	28.1581	-7.58134	9.75553e-06	Yes	0	ENSG00000180822	PSMG4
chr1	91248114	91248414	AluSx	-	SINE/Alu	AluSx	6.61698	0.517178	12.7944	9.77394e-06	Yes	-65321	ENSG00000143032	BARHL2
chr20	60006739	60007889	L1ME1	-	LINE/L1	L1ME1	24.494	2.45864	9.9624	9.77394e-06	Yes	0	ENSG00000179242	CDH4
chr3	185356493	185356798	AluSq2	+	SINE/Alu	AluSq2	0.628651	7.21987	-11.4847	9.87479e-06	Yes	4730	ENSG00000073792	IGF2BP2
chr1	25892605	25892932	L1ME4a	-	LINE/L1	L1ME4a	11.6458	0.730249	15.9477	9.89746e-06	Yes	0	ENSG00000157978	LDLRAP1
chr16	30083219	30083515	AluSg	+	SINE/Alu	AluSg	39.7864	5.16578	7.7019	9.92421e-06	Yes	1442	ENSG00000149925	ALDOA
chr14	62001922	62002477	L2b	-	LINE/L2	L2b	6.31655	0.464459	13.5998	1.01019e-05	Yes	0	ENSG00000027075	PRKCH
chr17	79356331	79356644	AluSx	-	SINE/Alu	AluSx	17.9213	1.15793	15.477	1.01275e-05	Yes	-12632	ENSG00000263053	RP11-1055B8.6
chr2	31497893	31498289	LTR16A	+	LTR/ERVL	LTR16A	41.2138	3.99832	10.3078	1.01376e-05	Yes	5581	ENSG00000013016	EHD3
chr9	70839008	70839490	HAL1	+	LINE/L1	HAL1	4.94947	0.428286	11.5565	1.01707e-05	Yes	-16908	ENSG00000196873	CBWD3
chr15	91648311	91649019	L2a	-	LINE/L2	L2a	3.97453	0.428289	9.28002	1.02455e-05	Yes	0	ENSG00000185518	SV2B
chr2	49454726	49458671	L1PA6	-	LINE/L1	L1PA6	171.342	20.7902	8.24151	1.02487e-05	Yes	-73051	ENSG00000170820	FSHR
chrX	115047427	115052815	L1MA1	-	LINE/L1	L1MA1	22.2012	1.0389	21.37	1.03093e-05	Yes	-93759	ENSG00000228532	RP1-241P17.4
chr15	90677887	90681532	HERVH-int|HERVH-int|HERVH-int|HERVH-int|HERVH-int|LTR7B	+	LTR/ERV1	HERVH-int	14.6579	0.952481	15.3892	1.038e-05	Yes	-22305	ENSG00000185033	SEMA4B
chr18	74711418	74711697	AluSz6	-	SINE/Alu	AluSz6	4.54983	0.428156	10.6266	1.038e-05	Yes	0	ENSG00000197971	MBP
chr5	148372225	148372357	MIRc	-	SINE/MIR	MIRc	6.29986	0.534528	11.7858	1.04212e-05	Yes	0	ENSG00000169247	SH3TC2
chr1	32152142	32152700	L2a	-	LINE/L2	L2a	11.3041	0.659017	17.153	1.04473e-05	Yes	0	ENSG00000084636	COL16A1
chr4	118571420	118573906	L1PA16	-	LINE/L1	L1PA16	12.108	0.679167	17.8277	1.04473e-05	Yes	-380868	ENSG00000164100	NDST3
chr6	46118726	46119822	L1MEg	+	LINE/L1	L1MEg	24.5071	2.11675	11.5777	1.04473e-05	Yes	4291	ENSG00000001561	ENPP4
chr7	130151774	130152026	AluSp	+	SINE/Alu	AluSp	95.0784	5.0202	18.9392	1.05159e-05	Yes	0	ENSG00000158623	COPG2
chr8	143582349	143582395	L2d2	+	LINE/L2	L2d2	7.09902	0.5867	12.0999	1.05281e-05	Yes	0	ENSG00000181790	BAI1
chr18	4021587	4021898	AluSx	-	SINE/Alu	AluSx	4.25874	0.467284	9.11381	1.05366e-05	Yes	0	ENSG00000170579	DLGAP1
chr15	64653576	64653863	AluJb	-	SINE/Alu	AluJb	0.624327	10.7995	-17.2978	1.05859e-05	Yes	0	ENSG00000259316	CTD-2116N17.1
chr18	14996792	14997303	THE1D|THE1D	+	LTR/ERVL-MaLR	THE1D	6.07163	0.519653	11.684	1.05859e-05	Yes	144056	ENSG00000180777	ANKRD30B
chr17	79349548	79349970	MLT2D	+	LTR/ERVL	MLT2D	13.0785	0.995431	13.1385	1.05916e-05	Yes	-19306	ENSG00000263053	RP11-1055B8.6
chr15	101612358	101612690	L1ME4b	+	LINE/L1	L1ME4b	10.3298	0.769818	13.4185	1.06106e-05	Yes	2042	ENSG00000154237	LRRK1
chr2	2834726	2835033	MSTD|MSTD	+	LTR/ERVL-MaLR	MSTD	8.26784	0.600527	13.7677	1.06298e-05	Yes	357664	ENSG00000032389	TSSC1
chr1	77360498	77366072	LTR7|HERVH-int|HERVH-int|HERVH-int|HERVH-int|HERVH-int|HERVH-int|LTR7	-	LTR/ERV1	HERVH-int	74.0886	4.87944	15.1838	1.06469e-05	Yes	0	ENSG00000117069	ST6GALNAC5
chr10	78973366	78975006	L2	+	LINE/L2	L2	6.81514	0.521892	13.0585	1.06694e-05	Yes	0	ENSG00000156113	KCNMA1
chr4	86929742	86930045	AluSc8	-	SINE/Alu	AluSc8	11.0709	0.777316	14.2425	1.08114e-05	Yes	5920	ENSG00000138639	ARHGAP24
chr10	89931322	89932599	L1MA5	-	LINE/L1	L1MA5	15.714	1.01482	15.4846	1.08131e-05	Yes	101023	ENSG00000184719	RNLS
chr12	49310481	49310578	L1ME4b	+	LINE/L1	L1ME4b	23.4491	1.67657	13.9864	1.08131e-05	Yes	0	ENSG00000272822	RP11-302B13.5
chr20	44835157	44835492	L2a	+	LINE/L2	L2a	14.6498	1.21902	12.0177	1.08131e-05	Yes	0	ENSG00000149654	CDH22
chr10	98112705	98112932	MIR	-	SINE/MIR	MIR	6.27581	0.428287	14.6533	1.08299e-05	Yes	0	ENSG00000197430	OPALIN
chr1	226029303	226029604	AluSx	-	SINE/Alu	AluSx	17.4767	1.22705	14.2429	1.08474e-05	Yes	0	ENSG00000143819	EPHX1
chr12	111387432	111387728	AluSg	-	SINE/Alu	AluSg	3.61479	0.468356	7.71804	1.08512e-05	Yes	-28907	ENSG00000111245	MYL2
chr14	80333626	80333995	MLT1B	-	LTR/ERVL-MaLR	MLT1B	22.9576	2.35665	9.74161	1.08845e-05	Yes	2865	ENSG00000021645	NRXN3
chr13	93178651	93179350	L2b	-	LINE/L2	L2b	6.88888	0.557772	12.3507	1.09033e-05	Yes	0	ENSG00000179399	GPC5
chr15	42697219	42697434	Charlie8	-	DNA/hAT-Charlie	Charlie8	9.63106	0.511997	18.8108	1.10054e-05	Yes	0	ENSG00000092529	CAPN3
chr1	155201062	155201338	L2c	-	LINE/L2	L2c	113.633	24.3178	4.67285	1.1026e-05	Yes	2906	ENSG00000177628	GBA
chr20	44034069	44034242	L2	-	LINE/L2	L2	14.975	0.749123	19.99	1.1161e-05	Yes	0	ENSG00000254806	SYS1-DBNDD2
chr10	102133881	102134482	L2	-	LINE/L2	L2	17.7796	1.51587	11.729	1.11672e-05	Yes	9291	ENSG00000099194	SCD
chr5	175137021	175137289	L2b	+	LINE/L2	L2b	45.2026	4.24078	10.659	1.11672e-05	Yes	23777	ENSG00000113749	HRH2
chr4	77844143	77845281	Tigger3b	+	DNA/TcMar-Tigger	Tigger3b	5.81927	0.517836	11.2377	1.11736e-05	Yes	-25142	ENSG00000186212	SOWAHB
chr10	1588858	1588988	LFSINE_Vert	-	SINE/tRNA	LFSINE_Vert	6.91834	0.487654	14.187	1.11941e-05	Yes	0	ENSG00000185736	ADARB2
chr13	39664421	39664812	MER96B	-	DNA/hAT-Tip100	MER96B	5.83564	0.468061	12.4677	1.11941e-05	Yes	40176	ENSG00000188811	NHLRC3
chr20	30557434	30557533	MIRc	+	SINE/MIR	MIRc	0.821076	10.6112	-12.9235	1.12783e-05	Yes	0	ENSG00000260903	XKR7
chr2	207415877	207416063	MER63A	-	DNA/hAT-Blackjack	MER63A	10.8657	0.740244	14.6785	1.13544e-05	Yes	0	ENSG00000114948	ADAM23
chr9	108172355	108173484	L1MB5	+	LINE/L1	L1MB5	9.9182	0.638085	15.5437	1.15471e-05	Yes	0	ENSG00000070214	SLC44A1
chr2	207416142	207416469	Tigger13a	+	DNA/TcMar-Tigger	Tigger13a	6.89923	0.614801	11.2219	1.1573e-05	Yes	0	ENSG00000114948	ADAM23
chr13	32991353	32993376	THE1C|THE1C-int|THE1C	+	LTR/ERVL-MaLR	THE1C-int	21.7486	1.01897	21.3436	1.16065e-05	Yes	0	ENSG00000139597	N4BP2L1
chr1	247196922	247197370	MER70A	-	LTR/ERVL	MER70A	11.4917	56.9548	-4.95618	1.16186e-05	Yes	0	ENSG00000135747	ZNF670
chr15	51654711	51655400	L2a	-	LINE/L2	L2a	4.63439	0.428243	10.8219	1.16186e-05	Yes	0	ENSG00000186417	GLDN
chr16	24872523	24872829	AluJo	+	SINE/Alu	AluJo	4.03876	0.427261	9.45266	1.16186e-05	Yes	0	ENSG00000158865	SLC5A11
chr18	14995330	14995527	L3	+	LINE/CR1	L3	5.11633	0.546101	9.36883	1.16654e-05	Yes	142594	ENSG00000180777	ANKRD30B
chr17	67070400	67073893	L1PA16	-	LINE/L1	L1PA16	18.5993	1.47738	12.5894	1.18146e-05	Yes	951	ENSG00000154262	ABCA6
chr6	27793624	27794403	LTR5_Hs	-	LTR/ERVK	LTR5_Hs	16.4487	1.39833	11.7632	1.18146e-05	Yes	1368	ENSG00000197238	HIST1H4J
chr19	52307949	52315192	LTR3A|HERVK3-int|HERVK3-int|HERVK3-int|HERVK3-int|LTR3A|HERVK3-int|LTR3A|LTR3A	-	LTR/ERVK	HERVK3-int	65.4518	5.34809	12.2383	1.18163e-05	Yes	0	ENSG00000187474	FPR3
chr2	128406195	128406519	AluJb	+	SINE/Alu	AluJb	5.10788	0.484968	10.5324	1.18163e-05	Yes	0	ENSG00000072163	LIMS2
chr16	5027489	5027658	ORSL-2a	+	DNA/hAT-Tip100	ORSL-2a	5.39231	0.428325	12.5893	1.18342e-05	Yes	0	ENSG00000103184	SEC14L5
chr11	1288681	1289131	L1MEi	+	LINE/L1	L1MEi	39.7154	4.48537	8.85443	1.20273e-05	Yes	5276	ENSG00000117983	MUC5B
chr2	95885053	95886352	L1MDa	-	LINE/L1	L1MDa	13.5764	146.726	-10.8074	1.21969e-05	Yes	34989	ENSG00000163067	ZNF2
chr10	132089073	132096053	MER9a3|HERVK9-int|MER9a3	+	LTR/ERVK	HERVK9-int	3.70318	0.470913	7.86383	1.22409e-05	Yes	106289	ENSG00000108010	GLRX3
chr7	13143335	13143798	MLT1C	+	LTR/ERVL-MaLR	MLT1C	3.53625	0.427049	8.28066	1.22458e-05	Yes	412777	ENSG00000122644	ARL4A
chr10	3085551	3085829	AluSq2	-	SINE/Alu	AluSq2	5.55509	0.534169	10.3995	1.2278e-05	Yes	-22697	ENSG00000067057	PFKP
chr18	72242126	72242225	AluSg4	+	SINE/Alu	AluSg4	3.31908	0.42708	7.77157	1.22867e-05	Yes	0	ENSG00000150656	CNDP1
chr6	28086980	28087276	AluSc	+	SINE/Alu	AluSc	7.28209	0.589109	12.3612	1.23061e-05	Yes	-5063	ENSG00000196812	ZSCAN16
chr15	66197562	66197801	MIRc	-	SINE/MIR	MIRc	24.2395	1.80574	13.4236	1.23122e-05	Yes	0	ENSG00000157890	MEGF11
chr1	55105456	55105727	L1ME3A	+	LINE/L1	L1ME3A	6.68739	0.571721	11.6969	1.24134e-05	Yes	592	ENSG00000162390	ACOT11
chr3	64164763	64165051	AluSp	-	SINE/Alu	AluSp	8.89033	0.520023	17.096	1.24322e-05	Yes	0	ENSG00000163637	PRICKLE2
chrX	70388299	70388601	AluSx1	+	SINE/Alu	AluSx1	17.1218	1.79309	9.54878	1.24455e-05	Yes	0	ENSG00000196338	NLGN3
chr20	44033669	44033753	L2	-	LINE/L2	L2	4.94982	0.517553	9.56389	1.2448e-05	Yes	0	ENSG00000254806	SYS1-DBNDD2
chr19	48553931	48554231	AluSz	-	SINE/Alu	AluSz	4.75078	0.428287	11.0925	1.24755e-05	Yes	0	ENSG00000105499	PLA2G4C
chr12	132810139	132810351	HERVIP10FH-int	+	LTR/ERV1	HERVIP10FH-int	3.26924	0.427952	7.63927	1.25707e-05	Yes	0	ENSG00000182870	GALNT9
chr5	149578130	149578374	LTR33	-	LTR/ERVL	LTR33	7.73964	0.633744	12.2126	1.25707e-05	Yes	0	ENSG00000011083	SLC6A7
chr17	66990317	66991742	L2	+	LINE/L2	L2	6.18582	0.544141	11.3681	1.25782e-05	Yes	0	ENSG00000154258	ABCA9
chr2	8525184	8526362	L1PA7	-	LINE/L1	L1PA7	4.78014	0.466112	10.2553	1.25782e-05	Yes	-292614	ENSG00000115738	ID2
chr17	36723203	36723452	AluJr	-	SINE/Alu	AluJr	7.7545	0.468438	16.5539	1.26938e-05	Yes	0	ENSG00000017373	SRCIN1
chr11	124803545	124804036	L2	+	LINE/L2	L2	6.29187	0.583177	10.789	1.27598e-05	Yes	0	ENSG00000165478	HEPACAM
chr5	177490452	177490946	L1ME3E	+	LINE/L1	L1ME3E	7.04822	0.467719	15.0693	1.27979e-05	Yes	7893	ENSG00000204677	FAM153C
chr16	29269889	29270317	MLT1D	-	LTR/ERVL-MaLR	MLT1D	5.10672	0.428196	11.9261	1.28983e-05	Yes	122359	ENSG00000254206	NPIPB11
chr21	44339218	44342568	HERVH48-int	-	LTR/ERV1	HERVH48-int	44.4879	2.18727	20.3395	1.28983e-05	Yes	5805	ENSG00000160194	NDUFV3
chr1	10480333	10480427	L1ME3D	+	LINE/L1	L1ME3D	44.5523	214.214	-4.80814	1.29457e-05	Yes	133	ENSG00000142657	PGD
chr15	25383915	25388582	MER110A|MER110-int|MER110-int	-	LTR/ERV1	MER110-int	6.47949	0.526595	12.3045	1.29457e-05	Yes	138493	ENSG00000214265	SNURF
chrX	107834943	107835966	L2a	+	LINE/L2	L2a	9.45353	0.532395	17.7566	1.29648e-05	Yes	0	ENSG00000188153	COL4A5
chr1	145016216	145016644	MLT1H	+	LTR/ERVL-MaLR	MLT1H	50.3613	9.8327	5.12182	1.29679e-05	Yes	0	ENSG00000178104	PDE4DIP
chr19	2288078	2288248	L3	-	LINE/CR1	L3	24.2526	1.46252	16.5828	1.31112e-05	Yes	1527	ENSG00000220008	LINGO3
chr1	49324889	49325256	LTR16C	+	LTR/ERVL	LTR16C	9.43806	0.767067	12.3041	1.31642e-05	Yes	0	ENSG00000186094	AGBL4
chr16	88750264	88750445	L1M4	+	LINE/L1	L1M4	23.5599	1.77436	13.2779	1.32182e-05	Yes	0	ENSG00000185669	SNAI3
chr1	40120607	40120911	AluSc	-	SINE/Alu	AluSc	4.31419	0.46879	9.20282	1.32969e-05	Yes	3883	ENSG00000116981	NT5C1A
chr18	9721669	9722421	L2a	-	LINE/L2	L2a	3.24134	0.428326	7.56747	1.32969e-05	Yes	0	ENSG00000168461	RAB31
chr4	17485587	17485877	AluSc	+	SINE/Alu	AluSc	53.8514	8.284	6.50066	1.33666e-05	Yes	0	ENSG00000151552	QDPR
chr21	15270096	15272201	MSTA|MSTA-int|MSTA|MSTA|MSTA-int|MSTA-int	-	LTR/ERVL-MaLR	MSTA-int	3.70069	0.427996	8.64655	1.33786e-05	Yes	208934	ENSG00000188992	LIPI
chrX	100419873	100420834	L2a	-	LINE/L2	L2a	2.69037	38.3184	-14.2428	1.34683e-05	Yes	1204	ENSG00000102384	CENPI
chr13	101831732	101831901	MamGypLTR2c	-	LTR/Gypsy	MamGypLTR2c	10.2916	0.671989	15.3151	1.35771e-05	Yes	0	ENSG00000102452	NALCN
chr1	228341692	228342812	L1MC3	-	LINE/L1	L1MC3	8.24047	0.67269	12.25	1.35948e-05	Yes	0	ENSG00000198835	GJC2
chr19	13323647	13324452	L2a	+	LINE/L2	L2a	12.024	0.841793	14.2838	1.35948e-05	Yes	0	ENSG00000141837	CACNA1A
chr5	109866637	109871214	LTR7|HERVH-int|HERVH-int|HERVH-int|HERVH-int|HERVH-int|HERVH-int|HERVH-int|LTR7	+	LTR/ERV1	HERVH-int	11.9691	0.812217	14.7364	1.35948e-05	Yes	0	ENSG00000186952	TMEM232
chr9	113629988	113630372	L2	+	LINE/L2	L2	10.7441	0.764656	14.0509	1.36968e-05	Yes	5172	ENSG00000198121	LPAR1
chr19	22128598	22133290	LTR25|LTR25-int	+	LTR/ERV1	LTR25-int	3.24305	0.465482	6.96707	1.38118e-05	Yes	0	ENSG00000160321	ZNF208
chr2	11042073	11044034	SVA_F	-	Retroposon/SVA	SVA_F	199.728	7.42998	26.8814	1.38767e-05	Yes	-8030	ENSG00000162975	KCNF1
chr11	1289200	1289507	AluSx	-	SINE/Alu	AluSx	25.8505	3.46759	7.45489	1.3978e-05	Yes	5795	ENSG00000117983	MUC5B
chr1	237269169	237269916	L2a	-	LINE/L2	L2a	6.15475	0.510619	12.0535	1.40412e-05	Yes	0	ENSG00000198626	RYR2
chr17	6596137	6596301	L2b	-	LINE/L2	L2b	10.8461	0.916157	11.8387	1.40779e-05	Yes	0	ENSG00000141485	SLC13A5
chr8	1285803	1286818	L1MB7	+	LINE/L1	L1MB7	5.35042	0.546626	9.7881	1.42987e-05	Yes	-162715	ENSG00000198010	DLGAP2
chr10	88801958	88802271	AluJb	-	SINE/Alu	AluJb	10.2249	0.782758	13.0626	1.43527e-05	Yes	7973	ENSG00000148672	GLUD1
chr12	121067427	121067727	AluSx	-	SINE/Alu	AluSx	28.6513	1.53912	18.6154	1.46073e-05	Yes	-10629	ENSG00000157782	CABP1
chr10	1182458	1182582	MARNA	-	DNA/TcMar-Mariner	MARNA	48.2823	5.97775	8.077	1.47173e-05	Yes	4222	ENSG00000047056	WDR37
chr10	64099649	64102479	MER41B|MER41-int	-	LTR/ERV1	MER41-int	36.3935	1.71861	21.1762	1.48657e-05	Yes	-31473	ENSG00000138311	ZNF365
chr5	82880059	82880978	Charlie2b	-	DNA/hAT-Charlie	Charlie2b	4.00969	31.6925	-7.904	1.49573e-05	Yes	1938	ENSG00000038427	VCAN
chr7	4985208	4985505	AluSz	-	SINE/Alu	AluSz	5.73245	0.465761	12.3077	1.50393e-05	Yes	0	ENSG00000136297	MMD2
chr3	39548320	39548806	L2b	+	LINE/L2	L2b	6.30436	0.427397	14.7506	1.50981e-05	Yes	0	ENSG00000168314	MOBP
chr14	68031958	68032207	AluJr	-	SINE/Alu	AluJr	14.7118	0.742324	19.8186	1.51121e-05	Yes	0	ENSG00000054690	PLEKHH1
chr6	141773962	141781817	LTR7|HERVH-int|HERVH-int|LTR7	+	LTR/ERV1	HERVH-int	6.60703	0.610668	10.8193	1.52391e-05	Yes	597651	ENSG00000135577	NMBR
chr16	27675136	27675432	AluJr	-	SINE/Alu	AluJr	5.14245	0.467039	11.0108	1.53058e-05	Yes	0	ENSG00000047578	KIAA0556
chr12	52692598	52693919	L1MA4	-	LINE/L1	L1MA4	16.3581	1.49753	10.9234	1.53972e-05	Yes	0	ENSG00000170442	KRT86
chr15	79504109	79504379	MIRb	-	SINE/MIR	MIRb	19.4221	0.861216	22.5519	1.54578e-05	Yes	-70768	ENSG00000235711	ANKRD34C
chr18	15183048	15183395	L1MEd	+	LINE/L1	L1MEd	6.28654	0.612622	10.2617	1.55662e-05	Yes	330312	ENSG00000180777	ANKRD30B
chr2	127789854	127791728	LTR37A|LTR37-int	+	LTR/ERV1	LTR37-int	45.4826	3.75233	12.1212	1.55662e-05	Yes	13876	ENSG00000136717	BIN1
chr1	20006496	20006719	MIRb	+	SINE/MIR	MIRb	15.4929	0.843215	18.3737	1.56774e-05	Yes	442	ENSG00000158748	HTR6
chr16	67207435	67207622	L2c	-	LINE/L2	L2c	12.0228	0.806034	14.916	1.57524e-05	Yes	0	ENSG00000140939	NOL3
chr2	11238777	11239090	AluSz6	-	SINE/Alu	AluSz6	4.34291	0.42716	10.1669	1.57524e-05	Yes	-34090	ENSG00000150873	C2orf50
chr19	47947164	47947450	AluJr	-	SINE/Alu	AluJr	5.71697	0.616484	9.27352	1.5843e-05	Yes	0	ENSG00000118160	SLC8A2
chr10	91092988	91093157	MER5A	+	DNA/hAT-Charlie	MER5A	32.1851	3.08008	10.4494	1.59083e-05	Yes	0	ENSG00000107798	LIPA
chr9	114313311	114313674	Charlie5	-	DNA/hAT-Charlie	Charlie5	23.0077	2.89182	7.95613	1.59083e-05	Yes	0	ENSG00000173258	ZNF483
chr1	78490295	78490580	AluJo	+	SINE/Alu	AluJo	45.9534	4.91638	9.34701	1.59518e-05	Yes	0	ENSG00000137960	GIPC2
chr14	93928024	93928317	L2c	-	LINE/L2	L2c	7.73356	0.584326	13.235	1.6014e-05	Yes	0	ENSG00000133958	UNC79
chr8	53285780	53286658	L2d	+	LINE/L2	L2d	3.61553	0.42793	8.44887	1.60178e-05	Yes	0	ENSG00000147488	ST18
chr13	32973924	32974222	AluSx	-	SINE/Alu	AluSx	2.01246	19.5534	-9.71616	1.60366e-05	Yes	120	ENSG00000139618	BRCA2
chr14	62598490	62598582	L2a	-	LINE/L2	L2a	30.1942	3.29154	9.17328	1.60366e-05	Yes	30060	ENSG00000139973	SYT16
chr8	112893340	112893649	AluSx1	+	SINE/Alu	AluSx1	2.40729	18.421	-7.65216	1.60366e-05	Yes	341509	ENSG00000164796	CSMD3
chr3	124175909	124176216	AluSz	-	SINE/Alu	AluSz	3.80485	0.510998	7.44591	1.6056e-05	Yes	0	ENSG00000160145	KALRN
chr4	89008733	89009056	AluSx	+	SINE/Alu	AluSx	14.0882	1.54816	9.09994	1.61368e-05	Yes	2361	ENSG00000118777	ABCG2
chr1	205481217	205481532	L2	-	LINE/L2	L2	5.19002	0.512231	10.1322	1.62421e-05	Yes	0	ENSG00000117266	CDK18
chr1	40119813	40120332	Tigger12c	-	DNA/TcMar-Tigger	Tigger12c	24.4718	1.59906	15.3039	1.62622e-05	Yes	4462	ENSG00000116981	NT5C1A
chr19	53858509	53858846	AluSc	-	SINE/Alu	AluSc	2.50737	18.6462	-7.43654	1.62622e-05	Yes	388	ENSG00000213799	ZNF845
chr10	88801659	88801955	AluSx1	-	SINE/Alu	AluSx1	12.1699	0.889351	13.684	1.63826e-05	Yes	8289	ENSG00000148672	GLUD1
chr19	44289711	44289817	L2a	-	LINE/L2	L2a	20.7713	1.38672	14.9787	1.64151e-05	Yes	-4303	ENSG00000104783	KCNN4
chr10	71248266	71249338	MER11A	-	LTR/ERVK	MER11A	4.3135	0.468527	9.20652	1.64505e-05	Yes	0	ENSG00000099282	TSPAN15
chr16	83777526	83777747	MIRb	+	SINE/MIR	MIRb	3.07568	0.427456	7.19531	1.64505e-05	Yes	0	ENSG00000140945	CDH13
chr12	132689007	132689260	MLT2B1	+	LTR/ERVL	MLT2B1	3.59453	0.51335	7.00211	1.64946e-05	Yes	0	ENSG00000182870	GALNT9
chr17	6596579	6597131	L1ME4c	+	LINE/L1	L1ME4c	14.0817	1.07393	13.1124	1.64946e-05	Yes	0	ENSG00000141485	SLC13A5
chr6	32869298	32869773	L1MC2	+	LINE/L1	L1MC2	64.1012	223.066	-3.47991	1.64946e-05	Yes	32634	ENSG00000242574	HLA-DMB
chr8	89754446	89759757	LTR7B|HERVH-int|HERVH-int|HERVH-int|HERVH-int|HERVH-int|HERVH-int|LTR7B	-	LTR/ERV1	HERVH-int	10.7032	0.928092	11.5324	1.654e-05	Yes	-414193	ENSG00000156103	MMP16
chr10	88801141	88801414	AluYk2	-	SINE/Alu	AluYk2	14.2657	1.16289	12.2675	1.65519e-05	Yes	8830	ENSG00000148672	GLUD1
chr13	67464503	67465008	MER67D	+	LTR/ERV1	MER67D	3.42926	0.427817	8.01573	1.69464e-05	Yes	0	ENSG00000184226	PCDH9
chr13	111373913	111374212	AluSc	-	SINE/Alu	AluSc	5.33718	29.4433	-5.51664	1.69523e-05	Yes	493	ENSG00000153487	ING1
chr15	65335569	65335997	L2a	+	LINE/L2	L2a	15.4455	1.28503	12.0196	1.69605e-05	Yes	-1712	ENSG00000186198	SLC51B
chr17	67239392	67239680	Tigger3a	-	DNA/TcMar-Tigger	Tigger3a	6.55389	0.566616	11.5667	1.69605e-05	Yes	0	ENSG00000154263	ABCA10
chr22	38401719	38401942	MER5C1	+	DNA/hAT-Charlie	MER5C1	5.44093	0.512735	10.6116	1.72436e-05	Yes	0	ENSG00000100142	POLR2F
chr22	51144962	51145070	MIR3	+	SINE/MIR	MIR3	4.44517	0.511869	8.68419	1.73075e-05	Yes	0	ENSG00000251322	SHANK3
chr12	11762701	11768228	LTR7B|HERVH-int|HERVH-int|HERVH-int|HERVH-int|HERVH-int|HERVH-int|LTR7B	-	LTR/ERV1	HERVH-int	11.5266	0.832366	13.848	1.76767e-05	Yes	-34561	ENSG00000139083	ETV6
chr5	76175726	76181435	LTR7B|HERVH-int|HERVH-int	-	LTR/ERV1	HERVH-int	4.25034	0.510109	8.33222	1.79673e-05	Yes	0	ENSG00000171643	S100Z
chr3	58401360	58402145	LTR39	-	LTR/ERV1	LTR39	16.1972	0.83193	19.4694	1.80036e-05	Yes	0	ENSG00000168297	PXK
chr18	3997966	3999272	L1MC5	-	LINE/L1	L1MC5	7.17239	0.561783	12.7672	1.81114e-05	Yes	0	ENSG00000170579	DLGAP1
chr2	127809379	127809580	MIRb	+	SINE/MIR	MIRb	25.4293	1.8739	13.5703	1.81114e-05	Yes	0	ENSG00000136717	BIN1
chr2	192995614	193000837	HERVH-int|HERVH-int|HERVH-int|HERVH-int|HERVH-int|HERVH-int|LTR7Y	+	LTR/ERV1	HERVH-int	24.8687	1.45069	17.1427	1.81114e-05	Yes	0	ENSG00000144339	TMEFF2
chr4	5900119	5900295	MIRb	-	SINE/MIR	MIRb	64.9772	5.47731	11.863	1.81114e-05	Yes	-5335	ENSG00000072832	CRMP1
chr20	47275109	47275484	L2a	-	LINE/L2	L2a	6.6971	0.509674	13.14	1.8292e-05	Yes	0	ENSG00000124126	PREX1
chr3	72261750	72262050	L1ME4b	-	LINE/L1	L1ME4b	3.87275	0.428159	9.04513	1.8292e-05	Yes	158927	ENSG00000163602	RYBP
chr4	21873220	21873642	MER31A	+	LTR/ERV1	MER31A	2.9611	0.427867	6.92061	1.8292e-05	Yes	0	ENSG00000185774	KCNIP4
chr4	88408082	88410700	L1PA7	-	LINE/L1	L1PA7	27.0764	1.95165	13.8736	1.8292e-05	Yes	0	ENSG00000152583	SPARCL1
chr19	21630397	21631161	L1PA7	-	LINE/L1	L1PA7	2.06085	20.8427	-10.1136	1.852e-05	Yes	0	ENSG00000269237	CTD-2561J22.3
chr7	75908670	75908764	L2c	-	LINE/L2	L2c	4.96994	0.560644	8.8647	1.85774e-05	Yes	0	ENSG00000177679	SRRM3
chr18	67968467	67969912	L2	-	LINE/L2	L2	5.18049	0.555075	9.33295	1.87958e-05	Yes	0	ENSG00000170677	SOCS6
chr6	28084335	28084652	AluJr4	+	SINE/Alu	AluJr4	4.05827	0.428317	9.47492	1.88179e-05	Yes	-7687	ENSG00000196812	ZSCAN16
chr17	26929916	26930207	AluSg	-	SINE/Alu	AluSg	21.9723	2.14816	10.2284	1.88827e-05	Yes	0	ENSG00000258472	RP11-192H23.4
chr19	24121912	24125825	L1MA4	-	LINE/L1	L1MA4	3.5705	32.6582	-9.14668	1.88827e-05	Yes	0	ENSG00000213967	ZNF726
chr11	64456424	64456641	MIRc	+	SINE/MIR	MIRc	6.78833	0.670544	10.1236	1.89428e-05	Yes	0	ENSG00000110076	NRXN2
chr1	210910802	210911732	L2a	+	LINE/L2	L2a	4.16173	0.427969	9.72439	1.9087e-05	Yes	0	ENSG00000143473	KCNH1
chr18	22084921	22085363	L1ME1	+	LINE/L1	L1ME1	3.29453	0.427363	7.70898	1.90996e-05	Yes	25001	ENSG00000134489	HRH4
chr4	7958611	7959101	LTR24	-	LTR/ERV1	LTR24	16.3564	1.01043	16.1875	1.91164e-05	Yes	7939	ENSG00000163995	ABLIM2
chr19	58036941	58037457	LTR6A	+	LTR/ERV1	LTR6A	36.664	2.70384	13.56	1.92184e-05	Yes	-1237	ENSG00000121406	ZNF549
chr11	113819093	113819302	MIRc	+	SINE/MIR	MIRc	3.65736	0.427731	8.55061	1.92759e-05	Yes	1807	ENSG00000149305	HTR3B
chr15	90043620	90043799	AluJo	-	SINE/Alu	AluJo	1.16507	14.1364	-12.1335	1.92759e-05	Yes	-3777	ENSG00000140519	RHCG
chr20	43298870	43305415	LTR7B|HERVH-int|HERVH-int|HERVH-int|LTR7B	+	LTR/ERV1	HERVH-int	10.8626	0.691474	15.7094	1.92759e-05	Yes	-17997	ENSG00000196839	ADA
chr4	6435654	6436074	L1ME4b	-	LINE/L1	L1ME4b	4.96178	0.427601	11.6038	1.932e-05	Yes	0	ENSG00000074211	PPP2R2C
chr14	68034772	68034859	Tigger16b	+	DNA/TcMar-Tigger	Tigger16b	6.88052	0.468123	14.6981	1.93445e-05	Yes	0	ENSG00000054690	PLEKHH1
chr6	33375868	33376125	L1MC5a	-	LINE/L1	L1MC5a	0.627694	8.1071	-12.9157	1.94015e-05	Yes	0	ENSG00000237649	KIFC1
chr14	55102580	55103800	L2a	-	LINE/L2	L2a	4.09059	0.467481	8.75028	1.94159e-05	Yes	0	ENSG00000020577	SAMD4A
chr17	43294010	43294488	L1ME4b	+	LINE/L1	L1ME4b	8.42485	0.559778	15.0503	1.94324e-05	Yes	-4324	ENSG00000184922	FMNL1
chr7	130702930	130703756	L2a	+	LINE/L2	L2a	4.6145	0.510055	9.04706	1.94805e-05	Yes	-91100	ENSG00000128585	MKLN1
chr19	48588811	48590910	L1PBb	+	LINE/L1	L1PBb	20.1954	1.07999	18.6995	1.95236e-05	Yes	0	ENSG00000105499	PLA2G4C
chr7	130738535	130739135	L2a	+	LINE/L2	L2a	3.66355	0.428208	8.55553	1.98864e-05	Yes	-55721	ENSG00000128585	MKLN1
chr15	89160816	89161461	MER92B	+	LTR/ERV1	MER92B	13.8346	1.15706	11.9567	1.99746e-05	Yes	-3067	ENSG00000181026	AEN
chr19	35820947	35821258	AluSx	+	SINE/Alu	AluSx	4.8114	0.427941	11.2432	2.00249e-05	Yes	0	ENSG00000012124	CD22
chr13	67553440	67554208	L2a	+	LINE/L2	L2a	8.3103	0.580358	14.3193	2.01038e-05	Yes	0	ENSG00000184226	PCDH9
chr4	153062252	153064837	L1PA6	+	LINE/L1	L1PA6	2.24151	0.427106	5.24813	2.01038e-05	Yes	177574	ENSG00000109670	FBXW7
chr5	148373740	148373967	MIRb	+	SINE/MIR	MIRb	5.68275	0.48657	11.6792	2.01575e-05	Yes	0	ENSG00000169247	SH3TC2
chr2	160791192	160792245	L1MC4a	-	LINE/L1	L1MC4a	4.51221	0.508414	8.87509	2.01619e-05	Yes	0	ENSG00000153246	PLA2R1
chr21	15237938	15239615	MSTA|MSTA-int	-	LTR/ERVL-MaLR	MSTA-int	5.02699	0.471356	10.6649	2.02394e-05	Yes	-184480	ENSG00000269011	AL050303.1
chr21	48002698	48003450	L1M4b	+	LINE/L1	L1M4b	30.8277	2.09279	14.7304	2.02646e-05	Yes	12773	ENSG00000160305	DIP2A
chr9	38547739	38549333	THE1D-int	-	LTR/ERVL-MaLR	THE1D-int	42.859	1.70555	25.1291	2.02814e-05	Yes	0	ENSG00000273170	ANKRD18A
chr4	113430110	113430152	LTR85c	+	LTR/Gypsy?	LTR85c	0.856642	10.3999	-12.1403	2.03719e-05	Yes	4521	ENSG00000178403	NEUROG2
chr1	166863379	166864135	L1MC1	-	LINE/L1	L1MC1	18.1031	1.80764	10.0147	2.03894e-05	Yes	-17816	ENSG00000152382	TADA1
chr11	66065180	66065336	ERVL-B4-int	-	LTR/ERVL	ERVL-B4-int	22.7951	1.94791	11.7024	2.03909e-05	Yes	1046	ENSG00000179292	TMEM151A
chr22	38408396	38409036	L1MD3	-	LINE/L1	L1MD3	8.51997	0.582243	14.633	2.0514e-05	Yes	0	ENSG00000100142	POLR2F
chr1	247197371	247197503	HERVL74-int	-	LTR/ERVL	HERVL74-int	5.33161	24.5888	-4.61189	2.05402e-05	Yes	0	ENSG00000135747	ZNF670
chr21	48011150	48013459	THE1B|THE1B-int|THE1B	+	LTR/ERVL-MaLR	THE1B-int	39.8831	4.14907	9.61254	2.0555e-05	Yes	5417	ENSG00000160307	S100B
chr17	26929281	26929524	AluJo	-	SINE/Alu	AluJo	20.6583	1.95378	10.5735	2.07746e-05	Yes	0	ENSG00000258472	RP11-192H23.4
chr5	79738227	79738668	L2a	-	LINE/L2	L2a	18.8868	1.12821	16.7405	2.07746e-05	Yes	0	ENSG00000039319	ZFYVE16
chr10	71258377	71258600	MIR	-	SINE/MIR	MIR	2.97629	0.427499	6.9621	2.08301e-05	Yes	0	ENSG00000099282	TSPAN15
chr21	15224427	15226713	MSTA|MSTA-int|MSTA|MSTA|MSTA-int|MSTA-int	-	LTR/ERVL-MaLR	MSTA-int	6.16289	0.472328	13.0479	2.08301e-05	Yes	-170969	ENSG00000269011	AL050303.1
chr6	46192526	46198629	L1PA5	-	LINE/L1	L1PA5	9.44308	0.665648	14.1863	2.09318e-05	Yes	0	ENSG00000172348	RCAN2
chr10	88808673	88808983	AluSx3	+	SINE/Alu	AluSx3	7.35847	0.600592	12.252	2.10539e-05	Yes	1261	ENSG00000148672	GLUD1
chr11	46385434	46385634	MIRb	+	SINE/MIR	MIRb	5.41996	0.467679	11.589	2.10539e-05	Yes	0	ENSG00000149091	DGKZ
chr1	24800492	24800621	MIRb	-	SINE/MIR	MIRb	6.03458	0.641495	9.40706	2.10948e-05	Yes	1027	ENSG00000001461	NIPAL3
chr16	66602508	66602801	AluSx	+	SINE/Alu	AluSx	15.021	65.851	-4.38394	2.11115e-05	Yes	0	ENSG00000254788	CKLF-CMTM1
chr18	72239741	72240054	AluJb	+	SINE/Alu	AluJb	5.23792	0.467522	11.2036	2.11516e-05	Yes	0	ENSG00000150656	CNDP1
chr6	2949452	2950482	L2a	+	LINE/L2	L2a	11.6333	0.932318	12.4778	2.11734e-05	Yes	0	ENSG00000124570	SERPINB6
chr9	38553086	38555494	MSTA-int|MSTA|MSTA-int|MSTA|MSTA|MSTA-int	-	LTR/ERVL-MaLR	MSTA-int	29.727	1.72387	17.2444	2.11734e-05	Yes	0	ENSG00000273170	ANKRD18A
chr9	131190395	131190555	MIR3	-	SINE/MIR	MIR3	7.35567	0.512395	14.3555	2.11734e-05	Yes	0	ENSG00000167123	CERCAM
chr19	48552053	48552464	MSTB1	+	LTR/ERVL-MaLR	MSTB1	6.33779	0.511705	12.3856	2.12403e-05	Yes	0	ENSG00000105499	PLA2G4C
chr6	86160745	86160858	MIR	+	SINE/MIR	MIR	6.89332	0.665729	10.3545	2.12802e-05	Yes	0	ENSG00000135318	NT5E
chr4	17486247	17486578	AluSz	+	SINE/Alu	AluSz	27.3204	3.96219	6.89527	2.13949e-05	Yes	0	ENSG00000151552	QDPR
chr19	23286028	23286830	MER61-int	+	LTR/ERV1	MER61-int	0.981534	14.346	-14.6159	2.14916e-05	Yes	0	ENSG00000183850	ZNF730
chr19	34879721	34880021	AluJr	+	SINE/Alu	AluJr	11.2987	0.737217	15.3261	2.14916e-05	Yes	0	ENSG00000105220	GPI
chr2	201265673	201265878	MLT1F	+	LTR/ERVL-MaLR	MLT1F	3.17729	0.427386	7.43423	2.14916e-05	Yes	0	ENSG00000196141	SPATS2L
chr20	10270729	10270783	Tigger19b	+	DNA/TcMar-Tigger	Tigger19b	3.53604	0.467241	7.56792	2.14916e-05	Yes	0	ENSG00000132639	SNAP25
chr20	61889464	61889824	MLT1C2	-	LTR/ERVL-MaLR	MLT1C2	17.0193	1.61765	10.521	2.14916e-05	Yes	0	ENSG00000101198	NKAIN4
chr3	120900632	120902395	L1PBa	+	LINE/L1	L1PBa	14.6259	0.590969	24.749	2.14916e-05	Yes	0	ENSG00000145087	STXBP5L
chr5	10629482	10630075	L2c	-	LINE/L2	L2c	2.86726	0.428109	6.69751	2.14916e-05	Yes	0	ENSG00000164236	ANKRD33B
chrX	56650420	56652448	L1PA8A	+	LINE/L1	L1PA8A	2.75341	20.3962	-7.40764	2.14916e-05	Yes	56978	ENSG00000188021	UBQLN2
chr12	99143560	99143953	L2a	-	LINE/L2	L2a	55.2321	4.70881	11.7295	2.19376e-05	Yes	0	ENSG00000185046	ANKS1B
chr9	33607606	33608661	L2a	+	LINE/L2	L2a	10.9932	0.732281	15.0123	2.19697e-05	Yes	34600	ENSG00000230453	ANKRD18B
chr10	79147395	79147675	AluSx1	-	SINE/Alu	AluSx1	7.60328	0.52725	14.4206	2.21274e-05	Yes	0	ENSG00000156113	KCNMA1
chr14	73595160	73598779	LTR7|HERVH-int|HERVH-int|HERVH-int	-	LTR/ERV1	HERVH-int	3.15749	0.467472	6.75439	2.21555e-05	Yes	-4348	ENSG00000080815	PSEN1
chr1	223378364	223378714	MLT1A0	-	LTR/ERVL-MaLR	MLT1A0	36.9621	2.34923	15.7337	2.22234e-05	Yes	15448	ENSG00000143502	SUSD4
chr2	8862880	8862970	FRAM	+	SINE/Alu	FRAM	22.4373	3.20427	7.0023	2.22234e-05	Yes	2439	ENSG00000134313	KIDINS220
chr8	101926993	101927432	MER1A	-	DNA/hAT-Charlie	MER1A	23.5009	2.26952	10.355	2.22234e-05	Yes	1322	ENSG00000164924	YWHAZ
chr1	32139164	32139388	MIRb	-	SINE/MIR	MIRb	9.00159	0.530512	16.9677	2.25284e-05	Yes	0	ENSG00000084636	COL16A1
chr5	139504654	139504792	Charlie4z	-	DNA/hAT-Charlie	Charlie4z	44.3327	4.1927	10.5738	2.26074e-05	Yes	-730	ENSG00000182700	IGIP
chr22	48417209	48418816	MLT1D-int|MLT1D	+	LTR/ERVL-MaLR	MLT1D-int	7.09584	0.615438	11.5298	2.26479e-05	Yes	-466457	ENSG00000219438	FAM19A5
chr15	32083896	32084760	L2	+	LINE/L2	L2	3.9319	0.467681	8.40722	2.30246e-05	Yes	0	ENSG00000169918	OTUD7A
chr8	89730743	89731181	L1P4	-	LINE/L1	L1P4	9.71409	0.665597	14.5945	2.30246e-05	Yes	-390490	ENSG00000156103	MMP16
chr21	48005461	48007480	L1PB1	+	LINE/L1	L1PB1	52.6437	4.13068	12.7446	2.32992e-05	Yes	11396	ENSG00000160307	S100B
chr14	62597429	62597535	L1PA8A	-	LINE/L1	L1PA8A	39.8164	3.02342	13.1693	2.34638e-05	Yes	28999	ENSG00000139973	SYT16
chr5	59846890	59847563	L1MB8	+	LINE/L1	L1MB8	9.13649	0.583126	15.6681	2.34638e-05	Yes	-28944	ENSG00000113448	PDE4D
chr6	6364211	6365394	L2a	-	LINE/L2	L2a	6.34088	0.468112	13.5457	2.34638e-05	Yes	-42966	ENSG00000124491	F13A1
chr11	49206446	49206636	MIR	+	SINE/MIR	MIR	12.1486	0.781714	15.541	2.38146e-05	Yes	0	ENSG00000086205	FOLH1
chr1	161339487	161339605	L1ME4b	-	LINE/L1	L1ME4b	59.4563	12.9733	4.58298	2.39206e-05	Yes	-1824	ENSG00000188931	C1orf192
chr1	206829924	206830222	AluSx	+	SINE/Alu	AluSx	1.24809	11.483	-9.20049	2.39206e-05	Yes	0	ENSG00000143479	DYRK3
chr5	150651354	150651654	AluSx	+	SINE/Alu	AluSx	53.6753	7.29303	7.3598	2.40322e-05	Yes	1354	ENSG00000196743	GM2A
chr1	46692622	46692915	AluJr4	-	SINE/Alu	AluJr4	16.2553	1.46943	11.0623	2.40722e-05	Yes	5690	ENSG00000171357	LURAP1
chr17	79354052	79354199	MIR3	+	SINE/MIR	MIR3	7.61417	0.599184	12.7076	2.41482e-05	Yes	-15077	ENSG00000263053	RP11-1055B8.6
chr10	91040872	91041274	MER31B	+	LTR/ERV1	MER31B	11.5956	0.846846	13.6927	2.43315e-05	Yes	0	ENSG00000107798	LIPA
chr3	26757738	26757841	MIR3	-	SINE/MIR	MIR3	3.62489	24.4787	-6.75294	2.43411e-05	Yes	5472	ENSG00000179796	LRRC3B
chr1	248876941	248881304	MER4-int|MER4-int|MER4-int|MER4-int|MER4-int|MER4A1	+	LTR/ERV1	MER4-int	5.74456	0.57418	10.0048	2.43787e-05	Yes	21413	ENSG00000266949	LYPD8
chr8	110665733	110667379	L2	+	LINE/L2	L2	5.00925	0.558956	8.9618	2.43787e-05	Yes	0	ENSG00000147642	SYBU
chr1	201484408	201485133	LTR8	-	LTR/ERV1	LTR8	11.1668	0.853634	13.0815	2.44948e-05	Yes	-5825	ENSG00000159176	CSRP1
chr10	61796505	61797072	L2b	+	LINE/L2	L2b	5.13216	0.500335	10.2575	2.45605e-05	Yes	0	ENSG00000151150	ANK3
chr11	94304452	94306839	L1PA5	-	LINE/L1	L1PA5	3.63635	0.467579	7.77698	2.45605e-05	Yes	0	ENSG00000134627	PIWIL4
chr17	72851591	72851741	MIRb	+	SINE/MIR	MIRb	3.68934	0.467659	7.88895	2.45605e-05	Yes	0	ENSG00000161509	GRIN2C
chr3	121057432	121059173	L1MA3	+	LINE/L1	L1MA3	15.5415	0.59792	25.9927	2.45605e-05	Yes	0	ENSG00000145087	STXBP5L
chr6	3469174	3469628	LTR7B	+	LTR/ERV1	LTR7B	34.1172	5.25316	6.4946	2.47344e-05	Yes	-11919	ENSG00000137266	SLC22A23
chr20	1672225	1673558	L1PA7	+	LINE/L1	L1PA7	4.08036	0.467755	8.72328	2.48851e-05	Yes	-33801	ENSG00000089012	SIRPG
chr6	31732710	31732873	FRAM	-	SINE/Alu	FRAM	14.763	0.982005	15.0336	2.50086e-05	Yes	83	ENSG00000255152	MSH5-SAPCD1
chr5	146200185	146200605	L2a	+	LINE/L2	L2a	6.58052	0.604713	10.8821	2.50117e-05	Yes	0	ENSG00000156475	PPP2R2B
chr2	31497669	31497862	L2d	+	LINE/L2	L2d	24.2533	3.54494	6.84166	2.53565e-05	Yes	5357	ENSG00000013016	EHD3
chr3	120902574	120903993	L1P2	+	LINE/L1	L1P2	10.7816	0.628761	17.1474	2.54043e-05	Yes	0	ENSG00000145087	STXBP5L
chr15	65333929	65334261	MLT1J|MLT1J-int	-	LTR/ERVL-MaLR	MLT1J-int	14.8439	1.27927	11.6035	2.55428e-05	Yes	-3448	ENSG00000186198	SLC51B
chr12	2372396	2373061	L2	-	LINE/L2	L2	4.27649	0.509087	8.40031	2.55515e-05	Yes	0	ENSG00000151067	CACNA1C
chr7	130152100	130152171	AluSq2	+	SINE/Alu	AluSq2	44.0426	2.39119	18.4187	2.56754e-05	Yes	0	ENSG00000158623	COPG2
chr1	111139057	111139344	Tigger10	+	DNA/TcMar-Tigger	Tigger10	100.096	8.5549	11.7004	2.56847e-05	Yes	0	ENSG00000177301	KCNA2
chr1	44742121	44743411	L2b	+	LINE/L2	L2b	8.63745	0.675525	12.7863	2.57002e-05	Yes	0	ENSG00000117419	ERI3
chr17	42988420	42988534	L2b	-	LINE/L2	L2b	5.73965	0.468292	12.2565	2.57856e-05	Yes	0	ENSG00000131095	GFAP
chr1	112007707	112008165	L2c	-	LINE/L2	L2c	84.1882	24.1041	3.49269	2.58209e-05	Yes	2313	ENSG00000116459	ATP5F1
chrX	47344656	47345262	MER92B	-	LTR/ERV1	MER92B	6.90679	33.2885	-4.81967	2.58279e-05	Yes	450	ENSG00000196741	CXorf24
chr1	160054941	160055182	MIR	-	SINE/MIR	MIR	15.1328	1.43424	10.5511	2.5911e-05	Yes	0	ENSG00000162728	KCNJ9
chrX	101761967	101762379	LTR57	-	LTR/ERVL	LTR57	0.541765	4.76745	-8.79984	2.59559e-05	Yes	6226	ENSG00000158164	TMSB15A
chr1	151672835	151672924	L2a	-	LINE/L2	L2a	1.15907	10.7216	-9.25014	2.60002e-05	Yes	1269	ENSG00000143376	SNX27
chr2	2818652	2821802	L1PA5	-	LINE/L1	L1PA5	5.83629	0.512185	11.3949	2.628e-05	Yes	370895	ENSG00000032389	TSSC1
chr21	15273665	15275330	MSTA|MSTA-int	-	LTR/ERVL-MaLR	MSTA-int	7.54503	0.634385	11.8935	2.65149e-05	Yes	205805	ENSG00000188992	LIPI
chr1	233761332	233762154	L2a	-	LINE/L2	L2a	2.81664	0.428253	6.57704	2.67018e-05	Yes	0	ENSG00000135750	KCNK1
chr12	73060047	73060345	AluJr	+	SINE/Alu	AluJr	12.9763	0.98628	13.1568	2.67082e-05	Yes	626	ENSG00000072657	TRHDE
chr20	10222043	10222578	L2b	-	LINE/L2	L2b	3.05506	0.471774	6.47569	2.6723e-05	Yes	0	ENSG00000132639	SNAP25
chr16	5048844	5049323	Tigger17a	+	DNA/TcMar-Tigger	Tigger17a	6.13531	0.491172	12.4912	2.67928e-05	Yes	0	ENSG00000103184	SEC14L5
chr18	22087441	22088202	L1MA2	+	LINE/L1	L1MA2	5.70796	0.428322	13.3263	2.68026e-05	Yes	27521	ENSG00000134489	HRH4
chr20	1785186	1785490	L2b	-	LINE/L2	L2b	24.5183	3.23192	7.58631	2.68026e-05	Yes	-89665	ENSG00000198053	SIRPA
chr1	1292907	1293196	AluSq2	+	SINE/Alu	AluSq2	36.2941	2.95078	12.2998	2.68447e-05	Yes	0	ENSG00000162576	MXRA8
chr3	63807120	63807643	L1MD1	+	LINE/L1	L1MD1	31.3217	2.35068	13.3245	2.73004e-05	Yes	0	ENSG00000163632	C3orf49
chr16	5047620	5048001	MLT1C2	-	LTR/ERVL-MaLR	MLT1C2	4.34618	0.469498	9.25706	2.74034e-05	Yes	0	ENSG00000103184	SEC14L5
chr20	10292446	10292800	LTR16C	+	LTR/ERVL	LTR16C	4.44242	0.51606	8.60835	2.74034e-05	Yes	4381	ENSG00000132639	SNAP25
chr12	91079019	91079781	L2a	-	LINE/L2	L2a	2.6254	0.427074	6.1474	2.74132e-05	Yes	219619	ENSG00000197651	CCER1
chr19	9852502	9857939	LTR7B|HERVH-int	+	LTR/ERV1	HERVH-int	30.311	2.22153	13.6442	2.74132e-05	Yes	4731	ENSG00000196605	ZNF846
chr7	123637667	123638407	L2	-	LINE/L2	L2	3.41146	0.427105	7.98739	2.74132e-05	Yes	26200	ENSG00000106304	SPAM1
chr2	127824365	127824672	AluJb	+	SINE/Alu	AluJb	8.73956	0.607104	14.3955	2.75348e-05	Yes	0	ENSG00000136717	BIN1
chr1	151823905	151824160	MamTip1	-	DNA/hAT-Tip100	MamTip1	25.074	2.41355	10.3889	2.75546e-05	Yes	0	ENSG00000196407	THEM5
chr14	101323320	101323382	L2a	+	LINE/L2	L2a	130.877	6.78677	19.2841	2.79087e-05	Yes	23611	ENSG00000254656	RTL1
chr2	95883686	95884713	MLT1B-int|MLT1B-int|MLT1B	-	LTR/ERVL-MaLR	MLT1B-int	8.32017	72.7257	-8.74089	2.79237e-05	Yes	33622	ENSG00000163067	ZNF2
chr3	193118439	193118551	MIRc	+	SINE/MIR	MIRc	19.9201	1.22963	16.2001	2.79237e-05	Yes	1316	ENSG00000127249	ATP13A4
chr15	25508196	25509090	L1MCa	+	LINE/L1	L1MCa	32.7486	2.16198	15.1475	2.8011e-05	Yes	73292	ENSG00000114062	UBE3A
chr2	201267433	201268187	L3	+	LINE/CR1	L3	3.77462	0.42806	8.81796	2.8011e-05	Yes	0	ENSG00000196141	SPATS2L
chr5	152104668	152107245	MER57A-int	+	LTR/ERV1	MER57A-int	4.01551	0.427396	9.3953	2.8011e-05	Yes	-291740	ENSG00000132911	NMUR2
chr15	42699532	42699826	AluY	-	SINE/Alu	AluY	7.84638	0.512608	15.3068	2.81383e-05	Yes	0	ENSG00000092529	CAPN3
chr11	86535521	86541678	L1PA3	-	LINE/L1	L1PA3	11.1073	0.830773	13.3699	2.82217e-05	Yes	0	ENSG00000150687	PRSS23
chr10	50935301	50936403	L1M5	+	LINE/L1	L1M5	8.21645	0.632312	12.9943	2.82331e-05	Yes	6287	ENSG00000197444	OGDHL
chr8	38400269	38400569	L1MB5	-	LINE/L1	L1MB5	2.50811	0.427261	5.87021	2.82331e-05	Yes	-14090	ENSG00000196166	C8orf86
chr20	10288906	10289070	AluSx1	-	SINE/Alu	AluSx1	2.50071	0.467164	5.35296	2.83098e-05	Yes	841	ENSG00000132639	SNAP25
chr19	35821818	35822124	AluSz	-	SINE/Alu	AluSz	4.83684	0.469839	10.2947	2.83259e-05	Yes	0	ENSG00000012124	CD22
chr1	233811203	233811577	MER57E1	-	LTR/ERV1	MER57E1	11.4002	0.883986	12.8964	2.85169e-05	Yes	2946	ENSG00000135750	KCNK1
chr12	1665807	1666497	L1MA7	-	LINE/L1	L1MA7	48.406	6.47322	7.47789	2.86035e-05	Yes	0	ENSG00000111186	WNT5B
chr14	23815289	23815387	MIRb	+	SINE/MIR	MIRb	101.137	19.9044	5.08115	2.86969e-05	Yes	129	ENSG00000092096	SLC22A17
chr18	74989193	74989555	THE1B	+	LTR/ERVL-MaLR	THE1B	8.2264	0.67391	12.207	2.88978e-05	Yes	8336	ENSG00000166573	GALR1
chr2	170948585	170949577	L1MB7	+	LINE/L1	L1MB7	24.8238	2.46071	10.0881	2.8898e-05	Yes	7945	ENSG00000144357	UBR3
chr5	87722629	87722837	Charlie32a	-	DNA/hAT-Charlie	Charlie32a	0.858069	8.09392	-9.43271	2.90002e-05	Yes	-157337	ENSG00000164180	TMEM161B
chr14	101320163	101320303	L2c	+	LINE/L2	L2c	141.169	6.86945	20.5502	2.91378e-05	Yes	-24627	ENSG00000267918	AL117190.2
chr3	167543894	167543972	Charlie8	+	DNA/hAT-Charlie	Charlie8	5.51522	0.638189	8.64199	2.92442e-05	Yes	539	ENSG00000163536	SERPINI1
chr21	15246741	15249173	MSTA-int|MSTA|MSTA-int|MSTA|MSTA|MSTA-int|MSTA-int	-	LTR/ERVL-MaLR	MSTA-int	3.75811	0.467483	8.03902	2.94425e-05	Yes	-193283	ENSG00000269011	AL050303.1
chr17	79087759	79088073	AluJb	-	SINE/Alu	AluJb	17.334	1.64143	10.5603	2.95818e-05	Yes	0	ENSG00000175866	BAIAP2
chr14	79717325	79718001	L2c	-	LINE/L2	L2c	3.05684	0.46857	6.52376	2.97222e-05	Yes	0	ENSG00000021645	NRXN3
chr21	15256559	15257339	MSTA|MSTA-int|MSTA|MSTA|MSTA-int	-	LTR/ERVL-MaLR	MSTA-int	2.4165	0.427059	5.65847	2.97222e-05	Yes	-203101	ENSG00000269011	AL050303.1
chr9	21454991	21455299	MER1B	+	DNA/hAT-Charlie	MER1B	5.96255	0.625126	9.53816	2.9855e-05	Yes	13677	ENSG00000197919	IFNA1
chr10	135311383	135316443	HERVL-int|MLT2A1	-	LTR/ERVL	HERVL-int	11.7144	0.724916	16.1597	3.01092e-05	Yes	0	ENSG00000203772	SPRN
chr11	49166678	49167401	LTR41	+	LTR/ERVL	LTR41	20.6675	1.93067	10.7048	3.04526e-05	Yes	787	ENSG00000086205	FOLH1
chr2	95887885	95888949	L1ME1	-	LINE/L1	L1ME1	7.04585	34.76	-4.93341	3.04526e-05	Yes	37821	ENSG00000163067	ZNF2
chr5	150479222	150479392	MIR3	-	SINE/MIR	MIR3	34.4039	8.15504	4.21872	3.08838e-05	Yes	882	ENSG00000197043	ANXA6
chr1	39995260	39995552	L1ME4a	-	LINE/L1	L1ME4a	12.7003	1.04458	12.1583	3.1044e-05	Yes	3654	ENSG00000183682	BMP8A
chr19	14597522	14597747	AluSz	-	SINE/Alu	AluSz	7.18062	0.568641	12.6277	3.1044e-05	Yes	0	ENSG00000123159	GIPC1
chr5	125830824	125831024	L1M5	+	LINE/L1	L1M5	10.1051	0.943808	10.7067	3.11497e-05	Yes	0	ENSG00000155324	GRAMD3
chr17	53034095	53034514	LTR72	-	LTR/ERV1	LTR72	96.4818	23.985	4.02258	3.11709e-05	Yes	0	ENSG00000141198	TOM1L1
chr14	68034864	68035322	L1PA10	+	LINE/L1	L1PA10	26.692	1.16231	22.9645	3.1343e-05	Yes	0	ENSG00000054690	PLEKHH1
chr19	21629686	21630298	L1P1	-	LINE/L1	L1P1	1.60031	15.6668	-9.78988	3.1343e-05	Yes	0	ENSG00000269237	CTD-2561J22.3
chr20	1916556	1916737	MIRb	+	SINE/MIR	MIRb	4.95696	0.511962	9.68227	3.14409e-05	Yes	0	ENSG00000198053	SIRPA
chr1	247198372	247198497	HERVL74-int	-	LTR/ERVL	HERVL74-int	2.78714	16.1543	-5.79601	3.16778e-05	Yes	0	ENSG00000135747	ZNF670
chr11	66067672	66068108	MLT1H	+	LTR/ERVL-MaLR	MLT1H	16.0451	1.25457	12.7893	3.16778e-05	Yes	3538	ENSG00000179292	TMEM151A
chr7	75901272	75901347	MIR3	-	SINE/MIR	MIR3	8.68792	0.696499	12.4737	3.17591e-05	Yes	0	ENSG00000177679	SRRM3
chr1	44430969	44431090	L2a	-	LINE/L2	L2a	9.21665	0.824097	11.1839	3.18019e-05	Yes	0	ENSG00000117408	IPO13
chr1	205525196	205525466	L2b	-	LINE/L2	L2b	20.9129	1.2821	16.3115	3.22011e-05	Yes	-12548	ENSG00000174514	MFSD4
chrX	139855442	139855801	Tigger12	+	DNA/TcMar-Tigger	Tigger12	27.5484	3.75546	7.33557	3.23044e-05	Yes	599	ENSG00000203930	LINC00632
chr11	65536752	65537685	L1MC4	-	LINE/L1	L1MC4	5.66215	0.60052	9.42875	3.23902e-05	Yes	5680	ENSG00000254470	AP5B1
chr11	66110297	66110803	L2	+	LINE/L2	L2	5.25108	0.613256	8.56263	3.24726e-05	Yes	0	ENSG00000174744	BRMS1
chr1	112008718	112009496	L1MEd	-	LINE/L1	L1MEd	22.0699	2.45755	8.98046	3.26098e-05	Yes	3324	ENSG00000116459	ATP5F1
chr9	113632842	113633676	L1MC4	+	LINE/L1	L1MC4	8.44391	0.69996	12.0634	3.26098e-05	Yes	1868	ENSG00000198121	LPAR1
chr3	124127232	124127419	MIR	+	SINE/MIR	MIR	10.9467	0.623528	17.556	3.29732e-05	Yes	0	ENSG00000160145	KALRN
chr12	111387096	111387269	Tigger4a	-	DNA/TcMar-Tigger	Tigger4a	3.54637	0.428323	8.27967	3.33715e-05	Yes	-28571	ENSG00000111245	MYL2
chr14	50924182	50925518	L2b	+	LINE/L2	L2b	15.712	1.08045	14.5421	3.33715e-05	Yes	0	ENSG00000012983	MAP4K5
chr20	4677900	4678581	L2a	-	LINE/L2	L2a	3.50246	0.468555	7.47502	3.33715e-05	Yes	0	ENSG00000171867	PRNP
chr1	46693597	46693902	L1MC5	-	LINE/L1	L1MC5	9.04667	0.606142	14.925	3.34943e-05	Yes	6665	ENSG00000171357	LURAP1
chr17	79086569	79086885	AluJr	+	SINE/Alu	AluJr	31.9713	2.53035	12.6351	3.35084e-05	Yes	0	ENSG00000175866	BAIAP2
chr14	93923525	93924215	L2c	-	LINE/L2	L2c	6.57132	0.689527	9.53018	3.35661e-05	Yes	0	ENSG00000133958	UNC79
chr2	27476209	27476527	AluJr	-	SINE/Alu	AluJr	6.92803	0.547542	12.653	3.35661e-05	Yes	26	ENSG00000115194	SLC30A3
chr20	1264987	1265916	L2a	-	LINE/L2	L2a	14.1298	1.35009	10.4658	3.35661e-05	Yes	0	ENSG00000244588	RAD21L1
chr6	16259243	16265124	LTR7|HERVH-int|HERVH-int|HERVH-int|HERVH-int|HERVH-int|HERVH-int|LTR7	-	LTR/ERV1	HERVH-int	17.3801	0.96768	17.9605	3.36138e-05	Yes	0	ENSG00000137198	GMPR
chr6	29635865	29635939	MIR	-	SINE/MIR	MIR	7.58341	0.42829	17.7063	3.3684e-05	Yes	0	ENSG00000204655	MOG
chr2	101999196	101999305	MIR3	-	SINE/MIR	MIR3	21.3061	1.30442	16.3338	3.37658e-05	Yes	0	ENSG00000175874	CREG2
chr13	107367699	107369394	L1MB7	-	LINE/L1	L1MB7	4.93712	0.42721	11.5567	3.38007e-05	Yes	-147188	ENSG00000134884	ARGLU1
chr3	93656899	93662915	LTR7|HERVH-int|HERVH-int|HERVH-int|LTR7	+	LTR/ERV1	HERVH-int	28.0552	3.48398	8.05263	3.38481e-05	Yes	0	ENSG00000184500	PROS1
chrX	21678877	21679218	L1MA1	-	LINE/L1	L1MA1	26.6643	3.03333	8.79044	3.38481e-05	Yes	-2430	ENSG00000185915	KLHL34
chr14	32576753	32577821	L2	-	LINE/L2	L2	7.55281	0.626222	12.0609	3.38606e-05	Yes	0	ENSG00000100852	ARHGAP5
chr8	4259025	4260315	L2a	+	LINE/L2	L2a	27.2722	1.24303	21.9401	3.39754e-05	Yes	0	ENSG00000183117	CSMD1
chr10	71308136	71308913	L1MEc	+	LINE/L1	L1MEc	3.55735	0.487533	7.29665	3.41266e-05	Yes	22542	ENSG00000122859	NEUROG3
chr1	112481850	112483254	L1PA7	-	LINE/L1	L1PA7	4.14869	0.534528	7.7614	3.42198e-05	Yes	0	ENSG00000171385	KCND3
chrX	120477750	120482482	LTR7|HERVH-int|HERVH-int|LTR7	-	LTR/ERV1	HERVH-int	3.64595	0.468122	7.78846	3.43589e-05	Yes	293957	ENSG00000182890	GLUD2
chr2	74665304	74666121	L2a	+	LINE/L2	L2a	4.95811	0.583363	8.49917	3.44713e-05	Yes	0	ENSG00000114993	RTKN
chr16	34750975	34758850	LTR3B_|HERVK3-int|LTR3B	+	LTR/ERVK	HERVK3-int	2.57891	0.427636	6.03063	3.46001e-05	Yes	493698	ENSG00000179755	CTD-2144E22.5
chr3	182894469	182894926	LTR50	+	LTR/ERVL	LTR50	204.914	33.8236	6.0583	3.48318e-05	Yes	906	ENSG00000053524	MCF2L2
chr15	55667887	55668187	AluJb	-	SINE/Alu	AluJb	5.52619	0.511408	10.8058	3.48578e-05	Yes	0	ENSG00000260916	CCPG1
chr1	24800933	24801034	MIRb	-	SINE/MIR	MIRb	17.4064	1.68662	10.3203	3.50315e-05	Yes	1468	ENSG00000001461	NIPAL3
chr17	77344969	77345280	L2	+	LINE/L2	L2	3.15315	0.428305	7.36192	3.50315e-05	Yes	0	ENSG00000167281	RBFOX3
chr1	205483840	205484225	L2b	-	LINE/L2	L2b	4.74275	0.468806	10.1167	3.50513e-05	Yes	0	ENSG00000117266	CDK18
chr3	101562299	101563829	Charlie1	-	DNA/hAT-Charlie	Charlie1	65.4585	11.1835	5.85312	3.50513e-05	Yes	0	ENSG00000144802	NFKBIZ
chr1	227978283	227978587	AluSx1	-	SINE/Alu	AluSx1	8.06907	0.770823	10.4681	3.5512e-05	Yes	9357	ENSG00000143740	SNAP47
chr5	177450808	177456949	L1PA4	-	LINE/L1	L1PA4	3.7878	0.467712	8.09857	3.55502e-05	Yes	0	ENSG00000204677	FAM153C
chr4	159201393	159201504	L2d2	+	LINE/L2	L2d2	17.3042	1.20464	14.3647	3.57397e-05	Yes	24831	ENSG00000164124	TMEM144
chr6	97064840	97064960	MamSINE1	+	SINE/tRNA-RTE	MamSINE1	9.85578	0.692197	14.2384	3.57665e-05	Yes	329	ENSG00000112214	FHL5
chr19	48017096	48017377	AluSx1	-	SINE/Alu	AluSx1	3.86935	0.511873	7.55921	3.5799e-05	Yes	0	ENSG00000105402	NAPA
chr20	21479992	21480143	Charlie30a	+	DNA/hAT-Charlie	Charlie30a	8.18381	0.580706	14.0929	3.58031e-05	Yes	11506	ENSG00000125820	NKX2-2
chr11	65489617	65490094	MER90a	+	LTR/ERV1	MER90a	31.4952	3.8729	8.13222	3.58375e-05	Yes	-1200	ENSG00000172922	RNASEH2C
chr17	75560981	75561276	AluSq2	+	SINE/Alu	AluSq2	17.1008	1.16544	14.6732	3.58375e-05	Yes	64304	ENSG00000184640	SEPT9
chr17	79355111	79355405	MLT1C2	-	LTR/ERVL-MaLR	MLT1C2	7.3485	0.538403	13.6487	3.58375e-05	Yes	-13871	ENSG00000263053	RP11-1055B8.6
chr19	19647499	19647763	AluSx4	+	SINE/Alu	AluSx4	32.2096	1.90246	16.9305	3.58375e-05	Yes	0	ENSG00000250067	YJEFN3
chr19	23151100	23153323	L1MA8	+	LINE/L1	L1MA8	10.8226	0.794558	13.621	3.58375e-05	Yes	4948	ENSG00000269067	ZNF728
chr20	1909091	1909355	L2a	-	LINE/L2	L2a	3.0737	0.428288	7.17672	3.58375e-05	Yes	0	ENSG00000198053	SIRPA
chr5	125831470	125831669	MLT1N2	-	LTR/ERVL-MaLR	MLT1N2	17.1102	1.02166	16.7474	3.58375e-05	Yes	0	ENSG00000155324	GRAMD3
chr6	88408337	88408456	MER103C	-	DNA/hAT-Charlie	MER103C	17.2686	81.1842	-4.70127	3.62243e-05	Yes	0	ENSG00000135334	AKIRIN2
chr22	34587302	34587681	MLT1C2	+	LTR/ERVL-MaLR	MLT1C2	4.58944	0.512317	8.95821	3.62963e-05	Yes	-268474	ENSG00000133424	LARGE
chr16	14421512	14421774	AluY	-	SINE/Alu	AluY	4.9918	0.626244	7.97102	3.63094e-05	Yes	60883	ENSG00000186260	MKL2
chr11	113818156	113818537	MLT1B	-	LTR/ERVL-MaLR	MLT1B	4.16465	0.514167	8.09981	3.63313e-05	Yes	870	ENSG00000149305	HTR3B
chr17	65030335	65030937	L2c	+	LINE/L2	L2c	6.57204	42.3579	-6.44517	3.63313e-05	Yes	822	ENSG00000075461	CACNG4
chr5	763641	764128	L1MC5a	+	LINE/L1	L1MC5a	5.30932	0.601269	8.83019	3.6472e-05	Yes	0	ENSG00000188818	ZDHHC11
chr10	96366105	96366398	AluJr	-	SINE/Alu	AluJr	0.801487	8.43334	-10.5221	3.65473e-05	Yes	0	ENSG00000119969	HELLS
chr20	44670404	44671093	L2c	-	LINE/L2	L2c	7.77171	0.581541	13.364	3.65473e-05	Yes	0	ENSG00000124140	SLC12A5
chr9	19636421	19636731	AluSx1	-	SINE/Alu	AluSx1	11.0245	0.916019	12.0353	3.66425e-05	Yes	0	ENSG00000155886	SLC24A2
chr12	99143185	99143469	L2a	-	LINE/L2	L2a	42.1449	3.00445	14.0275	3.66841e-05	Yes	0	ENSG00000185046	ANKS1B
chr16	57316136	57316409	AluJr	-	SINE/Alu	AluJr	3.30599	0.427198	7.73878	3.66989e-05	Yes	0	ENSG00000102934	PLLP
chr20	49498751	49499134	L1ME4b	+	LINE/L1	L1ME4b	80.2415	16.2384	4.94148	3.70526e-05	Yes	5038	ENSG00000124243	BCAS4
chr17	72870848	72871087	MER58B	+	DNA/hAT-Charlie	MER58B	5.49399	0.511421	10.7426	3.72367e-05	Yes	-1693	ENSG00000161513	FDXR
chr18	14223571	14225650	SVA_A	+	Retroposon/SVA	SVA_A	6.22774	0.642125	9.69864	3.7288e-05	Yes	-91083	ENSG00000175322	ZNF519
chr2	73279522	73279746	L1MC4	-	LINE/L1	L1MC4	4.82824	0.585909	8.2406	3.737e-05	Yes	0	ENSG00000144040	SFXN5
chr13	108104602	108106968	THE1C|THE1C-int|THE1C	-	LTR/ERVL-MaLR	THE1C-int	6.17097	0.625253	9.86957	3.74665e-05	Yes	0	ENSG00000204442	FAM155A
chr5	149614226	149614726	L3	-	LINE/CR1	L3	10.8965	0.670736	16.2455	3.74665e-05	Yes	0	ENSG00000070808	CAMK2A
chrX	149113576	149113964	HERV16-int	-	LTR/ERVL	HERV16-int	5.39611	0.62758	8.59828	3.74676e-05	Yes	-6548	ENSG00000197021	CXorf40B
chr16	8945420	8945556	MER113A	-	DNA/hAT-Charlie	MER113A	2.40677	15.1596	-6.29872	3.75255e-05	Yes	1244	ENSG00000153048	CARHSP1
chr20	44672902	44673251	L2d2	-	LINE/L2	L2d2	4.45134	0.467803	9.51541	3.75474e-05	Yes	0	ENSG00000124140	SLC12A5
chr12	59716969	59722767	LTR7|HERVH-int|HERVH-int|HERVH-int|HERVH-int|HERVH-int|HERVH-int|LTR7	-	LTR/ERV1	HERVH-int	9.09237	0.68663	13.242	3.78427e-05	Yes	194293	ENSG00000257230	RP11-272B17.2
chr10	96362610	96362905	L2	+	LINE/L2	L2	0.734217	8.12363	-11.0644	3.78784e-05	Yes	0	ENSG00000119969	HELLS
chr2	201292848	201293902	L2c	+	LINE/L2	L2c	4.98156	0.514926	9.67431	3.80455e-05	Yes	0	ENSG00000196141	SPATS2L
chr10	14040422	14041374	L2a	+	LINE/L2	L2a	9.49182	0.664832	14.277	3.81055e-05	Yes	0	ENSG00000151474	FRMD4A
chr3	185361183	185361353	MER5A	-	DNA/hAT-Charlie	MER5A	0.627671	6.79937	-10.8327	3.81397e-05	Yes	175	ENSG00000073792	IGF2BP2
chr6	13230967	13231238	AluJo	+	SINE/Alu	AluJo	3.98212	0.467253	8.5224	3.8405e-05	Yes	0	ENSG00000112137	PHACTR1
chr1	29195969	29196223	MIRc	-	SINE/MIR	MIRc	23.7778	2.21525	10.7337	3.84261e-05	Yes	5762	ENSG00000116329	OPRD1
chr1	40143797	40144101	AluSc	-	SINE/Alu	AluSc	27.5217	2.2834	12.0529	3.84261e-05	Yes	220	ENSG00000116983	HPCAL4
chr20	5281181	5281383	MIRc	-	SINE/MIR	MIRc	7.73289	81.2105	-10.502	3.84261e-05	Yes	935	ENSG00000101292	PROKR2
chr3	23276495	23277654	L2a	-	LINE/L2	L2a	7.54585	0.703308	10.7291	3.85246e-05	Yes	0	ENSG00000182247	UBE2E2
chr17	13936583	13937106	MLT1L	-	LTR/ERVL-MaLR	MLT1L	9.41983	40.8054	-4.33186	3.85876e-05	Yes	-35708	ENSG00000006695	COX10
chr19	20337004	20337948	L1P2	-	LINE/L1	L1P2	1.47009	16.4009	-11.1564	3.87529e-05	Yes	25706	ENSG00000256229	ZNF486
chr17	18570305	18570518	AluSp	-	SINE/Alu	AluSp	5.59353	30.4745	-5.44818	3.88311e-05	Yes	0	ENSG00000249459	ZNF286B
chr14	68031393	68031707	AluJb	-	SINE/Alu	AluJb	12.4584	0.605423	20.5779	3.89278e-05	Yes	0	ENSG00000054690	PLEKHH1
chr20	21480576	21480733	MIRc	-	SINE/MIR	MIRc	11.0432	0.745177	14.8196	3.89662e-05	Yes	10916	ENSG00000125820	NKX2-2
chr2	95886794	95886957	MIRc	+	SINE/MIR	MIRc	3.76977	26.1421	-6.93467	3.89747e-05	Yes	36730	ENSG00000163067	ZNF2
chr11	30004481	30004844	THE1D	-	LTR/ERVL-MaLR	THE1D	8.68826	0.637176	13.6356	3.91806e-05	Yes	26445	ENSG00000182255	KCNA4
chr16	24874904	24876599	L1M4	+	LINE/L1	L1M4	4.63309	0.486521	9.52291	3.91806e-05	Yes	0	ENSG00000158865	SLC5A11
chr1	92654074	92654441	L2c	-	LINE/L2	L2c	29.7542	5.0345	5.91006	3.93188e-05	Yes	3795	ENSG00000069712	KIAA1107
chr15	79325915	79326231	AluSx	-	SINE/Alu	AluSx	3.1884	0.428189	7.44624	3.93779e-05	Yes	0	ENSG00000058335	RASGRF1
chr16	88750903	88751197	AluSx1	-	SINE/Alu	AluSx1	32.7357	4.40209	7.43639	3.93779e-05	Yes	0	ENSG00000185669	SNAI3
chr6	46122395	46126000	L1MD1	-	LINE/L1	L1MD1	34.9105	3.22976	10.809	3.93916e-05	Yes	925	ENSG00000112796	ENPP5
chr7	4932348	4932643	AluSx3	-	SINE/Alu	AluSx3	3.58926	0.533856	6.72328	3.94508e-05	Yes	-8999	ENSG00000157927	RADIL
chr2	242810672	242810848	L1ME3B	+	LINE/L1	L1ME3B	4.67776	0.545023	8.58268	3.94971e-05	Yes	-905	ENSG00000188011	CXXC11
chr1	1292613	1292906	MER54A	+	LTR/ERVL	MER54A	46.6612	5.49097	8.49781	3.95016e-05	Yes	0	ENSG00000162576	MXRA8
chr1	44061191	44062057	L2	-	LINE/L2	L2	6.78746	0.705585	9.61963	3.95467e-05	Yes	0	ENSG00000142949	PTPRF
chr1	236035620	236035949	MER39	-	LTR/ERV1	MER39	3.194	0.513707	6.21756	3.95467e-05	Yes	0	ENSG00000143669	LYST
chr11	117171539	117172024	L2b	+	LINE/L2	L2b	6.25335	0.522571	11.9665	3.95467e-05	Yes	0	ENSG00000186318	BACE1
chr12	121085998	121086219	L2b	+	LINE/L2	L2b	4.75166	0.511725	9.28556	3.95467e-05	Yes	0	ENSG00000157782	CABP1
chr15	65334265	65334503	MLT1J	+	LTR/ERVL-MaLR	MLT1J	5.3313	0.609137	8.75222	3.95467e-05	Yes	-3206	ENSG00000186198	SLC51B
chr18	13003878	13005060	L2a	-	LINE/L2	L2a	8.92992	0.83474	10.6978	3.95467e-05	Yes	0	ENSG00000101639	CEP192
chr22	28319526	28319778	MIRb	+	SINE/MIR	MIRb	7.69804	35.5103	-4.6129	4.03016e-05	Yes	-3405	ENSG00000180957	PITPNB
chr1	153578489	153578799	AluSp	+	SINE/Alu	AluSp	7.76349	0.801415	9.68723	4.04276e-05	Yes	564	ENSG00000188643	S100A16
chr6	84521352	84521657	AluYa5	-	SINE/Alu	AluYa5	8.74822	0.640483	13.6588	4.04683e-05	Yes	-41329	ENSG00000203877	RIPPLY2
chr20	44852124	44852236	L2a	+	LINE/L2	L2a	5.66014	0.512252	11.0495	4.05226e-05	Yes	0	ENSG00000149654	CDH22
chr1	160064431	160064613	MIR3	+	SINE/MIR	MIR3	32.0538	2.56548	12.4942	4.08514e-05	Yes	0	ENSG00000162729	IGSF8
chr19	52616042	52616336	AluSz6	+	SINE/Alu	AluSz6	1.96405	14.993	-7.63373	4.08514e-05	Yes	9	ENSG00000204611	ZNF616
chr15	74028065	74028275	MIR	+	SINE/MIR	MIR	132.251	24.4036	5.41931	4.0882e-05	Yes	3867	ENSG00000205363	C15orf59
chr20	47276833	47277430	L1M5	+	LINE/L1	L1M5	10.9565	0.905567	12.0991	4.0882e-05	Yes	0	ENSG00000124126	PREX1
chr4	17504294	17505288	L1MC5a	+	LINE/L1	L1MC5a	12.3501	0.772519	15.9868	4.13731e-05	Yes	0	ENSG00000151552	QDPR
chr10	5015441	5015931	MLT1H	-	LTR/ERVL-MaLR	MLT1H	2.25107	17.1079	-7.59988	4.13927e-05	Yes	0	ENSG00000187134	AKR1C1
chr3	193117695	193118054	L3	-	LINE/CR1	L3	34.5801	1.75799	19.6702	4.1513e-05	Yes	1813	ENSG00000127249	ATP13A4
chr5	146390338	146390957	L2a	+	LINE/L2	L2a	3.12805	0.427058	7.32464	4.1513e-05	Yes	0	ENSG00000156475	PPP2R2B
chr13	48844360	48844587	L2a	+	LINE/L2	L2a	9.58173	0.787908	12.161	4.15491e-05	Yes	7298	ENSG00000136156	ITM2B
chr19	41052938	41054102	L1PA6	-	LINE/L1	L1PA6	6.11875	0.613335	9.9762	4.16348e-05	Yes	0	ENSG00000160460	SPTBN4
chr2	99367597	99368143	LTR29	+	LTR/ERV1	LTR29	12.4813	1.12814	11.0636	4.17854e-05	Yes	-20009	ENSG00000071073	MGAT4A
chr5	163158301	163158736	MER39	+	LTR/ERV1	MER39	3.45884	0.472563	7.31933	4.17932e-05	Yes	211960	ENSG00000038274	MAT2B
chr1	223391304	223391910	MSTB1|MSTB1-int	+	LTR/ERVL-MaLR	MSTB1-int	14.1524	1.08517	13.0416	4.18403e-05	Yes	2252	ENSG00000143502	SUSD4
chr16	19720632	19720810	L2a	+	LINE/L2	L2a	6.76848	0.51144	13.2342	4.18403e-05	Yes	0	ENSG00000103550	KNOP1
chr11	66065726	66066060	MLT1J	+	LTR/ERVL-MaLR	MLT1J	48.7176	3.80408	12.8067	4.19184e-05	Yes	1592	ENSG00000179292	TMEM151A
chr4	115523685	115524762	L2a	-	LINE/L2	L2a	3.36199	0.428289	7.84981	4.1928e-05	Yes	0	ENSG00000174607	UGT8
chr15	69498157	69500000	L1MC3	-	LINE/L1	L1MC3	3.83687	23.6433	-6.16213	4.21087e-05	Yes	0	ENSG00000138604	GLCE
chr10	91090945	91091229	AluJr	-	SINE/Alu	AluJr	42.6009	4.86474	8.75709	4.21704e-05	Yes	0	ENSG00000107798	LIPA
chr16	13054725	13055293	L2b	-	LINE/L2	L2b	1.9808	0.428072	4.62726	4.21704e-05	Yes	0	ENSG00000237515	SHISA9
chr21	48003451	48003833	MSTD	+	LTR/ERVL-MaLR	MSTD	21.239	2.00148	10.6116	4.21704e-05	Yes	13526	ENSG00000160305	DIP2A
chr8	144062067	144062471	L1MEd	-	LINE/L1	L1MEd	35.6843	4.65545	7.66507	4.21704e-05	Yes	-36929	ENSG00000160932	LY6E
chr14	93135459	93135733	L2a	-	LINE/L2	L2a	10.7885	0.7428	14.5241	4.23427e-05	Yes	0	ENSG00000100599	RIN3
chr20	44022847	44024094	LTR2752	+	LTR/ERV1	LTR2752	13.5205	0.999467	13.5277	4.23427e-05	Yes	0	ENSG00000254806	SYS1-DBNDD2
chr1	214840665	214841499	L1PA16	+	LINE/L1	L1PA16	1.55939	21.4083	-13.7287	4.23561e-05	Yes	2735	ENSG00000117724	CENPF
chr11	126793344	126793639	AluSx1	-	SINE/Alu	AluSx1	9.96251	0.875829	11.375	4.23826e-05	Yes	0	ENSG00000149571	KIRREL3
chr6	136661266	136661568	AluJr	-	SINE/Alu	AluJr	11.4689	0.800345	14.3299	4.23951e-05	Yes	2308	ENSG00000135525	MAP7
chr1	233810958	233811188	Tigger15a	+	DNA/TcMar-Tigger	Tigger15a	6.96166	0.680638	10.2281	4.24172e-05	Yes	2701	ENSG00000135750	KCNK1
chr19	576481	576777	AluSg4	+	SINE/Alu	AluSg4	4.81377	0.640043	7.52102	4.24767e-05	Yes	0	ENSG00000172270	BSG
chr1	230934522	230934676	MER5A1	+	DNA/hAT-Charlie	MER5A1	12.6112	1.22458	10.2983	4.27629e-05	Yes	0	ENSG00000135773	CAPN9
chr1	213127244	213127554	AluJb	-	SINE/Alu	AluJb	0.864221	8.64289	-10.0008	4.29786e-05	Yes	0	ENSG00000143494	VASH2
chr10	88807558	88807855	AluSx	+	SINE/Alu	AluSx	6.47647	0.661915	9.78444	4.30648e-05	Yes	2389	ENSG00000148672	GLUD1
chr17	46025913	46026033	MER5A1	+	DNA/hAT-Charlie	MER5A1	86.1012	15.1617	5.67887	4.4104e-05	Yes	260	ENSG00000108439	PNPO
chr1	6192294	6192934	L1MEi	-	LINE/L1	L1MEi	3.00641	0.428302	7.01937	4.41925e-05	Yes	0	ENSG00000116254	CHD5
chr5	702078	702314	L1MEd	-	LINE/L1	L1MEd	11.1834	0.585758	19.0922	4.43356e-05	Yes	8158	ENSG00000188818	ZDHHC11
chr10	88804238	88804531	AluYm1	-	SINE/Alu	AluYm1	6.7961	0.735939	9.23459	4.43976e-05	Yes	5713	ENSG00000148672	GLUD1
chr2	95887041	95887186	L1MEd	-	LINE/L1	L1MEd	4.46732	22.4584	-5.02726	4.45022e-05	Yes	36977	ENSG00000163067	ZNF2
chr7	92108507	92114588	LTR7|HERVH-int|HERVH-int|HERVH-int|LTR7	-	LTR/ERV1	HERVH-int	52.6581	3.48216	15.1223	4.45658e-05	Yes	-1208	ENSG00000242950	ERVW-1
chr20	45062000	45062624	MLT2B3|MLT2B3	+	LTR/ERVL	MLT2B3	10.3581	1.14628	9.03623	4.46641e-05	Yes	-297	ENSG00000062598	ELMO2
chrX	115032766	115040555	LTR2|Harlequin-int|LTR2	-	LTR/ERV1	Harlequin-int	26.5828	1.58727	16.7475	4.48073e-05	Yes	-79098	ENSG00000228532	RP1-241P17.4
chr9	19706701	19709908	L1PA4	+	LINE/L1	L1PA4	2.20889	0.427841	5.16288	4.5253e-05	Yes	0	ENSG00000155886	SLC24A2
chr13	67554268	67554410	L2a	+	LINE/L2	L2a	4.66778	0.560385	8.3296	4.56019e-05	Yes	0	ENSG00000184226	PCDH9
chr16	19720903	19721086	L2a	+	LINE/L2	L2a	9.46583	0.734514	12.8872	4.56875e-05	Yes	0	ENSG00000103550	KNOP1
chr2	181935598	181935779	L2a	-	LINE/L2	L2a	1.047	9.89479	-9.45062	4.57934e-05	Yes	0	ENSG00000170035	UBE2E3
chr5	59844678	59846706	L1MA4A	+	LINE/L1	L1MA4A	9.1291	0.642011	14.2195	4.58642e-05	Yes	-26732	ENSG00000113448	PDE4D
chr15	65335197	65335558	MLT1K	+	LTR/ERVL-MaLR	MLT1K	15.9132	1.26987	12.5314	4.60195e-05	Yes	-2151	ENSG00000186198	SLC51B
chr17	61747977	61748531	L2c	-	LINE/L2	L2c	3.81643	0.427415	8.92909	4.60195e-05	Yes	0	ENSG00000198909	MAP3K3
chr19	6497664	6497936	AluYe5	+	SINE/Alu	AluYe5	3.88091	0.535023	7.25373	4.60589e-05	Yes	0	ENSG00000104833	TUBB4A
chr16	66601496	66602292	L1M5	+	LINE/L1	L1M5	13.2204	72.2799	-5.46732	4.60762e-05	Yes	0	ENSG00000254788	CKLF-CMTM1
chr1	153562071	153562370	AluSp	+	SINE/Alu	AluSp	8.14894	0.845703	9.6357	4.6206e-05	Yes	16993	ENSG00000188643	S100A16
chr15	34399403	34399854	L1ME4b	-	LINE/L1	L1ME4b	27.0123	5.13663	5.25877	4.65e-05	Yes	2813	ENSG00000182405	PGBD4
chr2	163289113	163290215	L1PA16	+	LINE/L1	L1PA16	1.01494	11.6721	-11.5003	4.65e-05	Yes	0	ENSG00000184611	KCNH7
chr2	192829145	192830714	L2c	+	LINE/L2	L2c	22.4945	1.43963	15.6252	4.65e-05	Yes	0	ENSG00000144339	TMEFF2
chrX	24561866	24561933	L1M6	-	LINE/L1	L1M6	6.02522	0.725457	8.30541	4.65e-05	Yes	3913	ENSG00000067992	PDK3
chr12	108649698	108649855	MER63A	+	DNA/hAT-Blackjack	MER63A	15.7118	0.978021	16.0649	4.70184e-05	Yes	5385	ENSG00000075035	WSCD2
chr4	21729579	21730562	L2a	+	LINE/L2	L2a	5.54358	0.515469	10.7544	4.70184e-05	Yes	0	ENSG00000185774	KCNIP4
chr2	200653088	200654784	L1ME3G	+	LINE/L1	L1ME3G	7.866	0.55291	14.2265	4.72829e-05	Yes	0	ENSG00000226124	FTCDNL1
chr3	108410267	108410605	MER39	-	LTR/ERV1	MER39	44.4702	12.5573	3.54137	4.73488e-05	Yes	0	ENSG00000198919	DZIP3
chr10	122604444	122610073	LTR7Y|HERVH-int|HERVH-int|HERVH-int|HERVH-int|HERVH-int|HERVH-int|LTR7Y	+	LTR/ERV1	HERVH-int	13.7286	1.63678	8.3876	4.74685e-05	Yes	-615	ENSG00000120008	WDR11
chr1	32140408	32140466	L2a	-	LINE/L2	L2a	4.5391	0.428135	10.602	4.77225e-05	Yes	0	ENSG00000084636	COL16A1
chr1	155104229	155104708	L2b	-	LINE/L2	L2b	6.40027	0.5851	10.9388	4.77225e-05	Yes	0	ENSG00000169242	EFNA1
chr14	97663606	97663908	AluSz	+	SINE/Alu	AluSz	3.19411	0.513095	6.22518	4.77225e-05	Yes	265548	ENSG00000100749	VRK1
chr15	56381480	56381727	MLT1L	+	LTR/ERVL-MaLR	MLT1L	2.92264	21.0352	-7.19732	4.77225e-05	Yes	0	ENSG00000181827	RFX7
chr19	55794120	55794392	AluJr	-	SINE/Alu	AluJr	5.53645	0.544708	10.1641	4.77225e-05	Yes	0	ENSG00000160469	BRSK1
chr3	98289591	98289993	L1ME3E	-	LINE/L1	L1ME3E	15.3729	1.98481	7.74527	4.80575e-05	Yes	0	ENSG00000080819	CPOX
chr1	230932790	230932938	MER5B	+	DNA/hAT-Charlie	MER5B	11.6264	1.00824	11.5314	4.80685e-05	Yes	0	ENSG00000135773	CAPN9
chr4	96837	98850	MER61-int|MER61-int|MER61-int|MER61-int	+	LTR/ERV1	MER61-int	15.0828	1.51061	9.98458	4.81889e-05	Yes	8739	ENSG00000197701	ZNF595
chr5	109871509	109878852	MER51A|HERV4_I-int|HERV4_I-int|HERV4_I-int|MER51A	+	LTR/ERV1	HERV4_I-int	8.44932	0.764916	11.0461	4.83165e-05	Yes	0	ENSG00000186952	TMEM232
chr14	58578398	58578711	AluJr	-	SINE/Alu	AluJr	0.53889	4.46387	-8.28345	4.83348e-05	Yes	0	ENSG00000139971	C14orf37
chr6	84734830	84735196	MSTA	+	LTR/ERVL-MaLR	MSTA	10.2831	0.896985	11.4641	4.86692e-05	Yes	-8280	ENSG00000135324	MRAP2
chr1	173766384	173767032	L1MC5a	-	LINE/L1	L1MC5a	2.93243	23.9637	-8.17194	4.87716e-05	Yes	1657	ENSG00000120334	CENPL
chr4	41050656	41052131	SVA_C	+	Retroposon/SVA	SVA_C	9.27746	0.879141	10.5529	4.90265e-05	Yes	0	ENSG00000163697	APBB2
chr9	138602248	138602343	MIR1_Amn	+	SINE/MIR	MIR1_Amn	4.90373	0.42826	11.4504	4.90342e-05	Yes	0	ENSG00000107147	KCNT1
chr12	132908875	132909180	AluJb	+	SINE/Alu	AluJb	11.8231	0.997966	11.8472	4.91084e-05	Yes	-2941	ENSG00000182870	GALNT9
chr6	31034380	31035833	SVA_C	-	Retroposon/SVA	SVA_C	99.7932	15.8835	6.28284	4.91084e-05	Yes	31202	ENSG00000261272	MUC22
chr8	97984283	97990209	L1PB1	+	LINE/L1	L1PB1	3.58387	0.488807	7.33188	4.92229e-05	Yes	0	ENSG00000104324	CPQ
chr3	158506149	158506362	LTR91A	-	LTR	LTR91A	11.2301	1.00563	11.1672	4.92807e-05	Yes	0	ENSG00000118855	MFSD1
chr1	50893270	50893466	MIRb	-	SINE/MIR	MIRb	0.622716	11.2474	-18.0619	4.95794e-05	Yes	-4099	ENSG00000142700	DMRTA2
chr20	44852482	44852790	AluSz	-	SINE/Alu	AluSz	3.44679	0.515941	6.68059	4.96032e-05	Yes	0	ENSG00000149654	CDH22
chr14	36285505	36286215	L2c	+	LINE/L2	L2c	12.1345	1.24674	9.73295	4.99465e-05	Yes	-6996	ENSG00000174373	RALGAPA1
chr8	89721759	89723585	MER34-int|MER34-int	+	LTR/ERV1	MER34-int	30.5317	2.94419	10.3701	4.99475e-05	Yes	-381506	ENSG00000156103	MMP16
chr2	85836812	85837102	AluSx	-	SINE/Alu	AluSx	6.95191	33.164	-4.77049	5.01489e-05	Yes	0	ENSG00000168883	USP39
chr4	99440	101224	MER61-int|MER61C	+	LTR/ERV1	MER61-int	15.6171	1.45549	10.7298	5.0346e-05	Yes	11342	ENSG00000197701	ZNF595
chr12	11655710	11656986	L1MD	-	LINE/L1	L1MD	59.7662	9.44228	6.32964	5.03649e-05	Yes	-1736	ENSG00000121335	PRB2
chrX	95600377	95605890	L1PA5	-	LINE/L1	L1PA5	9.10616	0.778978	11.6899	5.04576e-05	Yes	-333773	ENSG00000147202	DIAPH2
chr22	28319002	28319316	AluSq2	-	SINE/Alu	AluSq2	8.87449	37.1099	-4.18163	5.05219e-05	Yes	-2881	ENSG00000180957	PITPNB
chr11	61304419	61304610	MIR3	-	SINE/MIR	MIR3	5.26879	0.584792	9.00969	5.06953e-05	Yes	0	ENSG00000011347	SYT7
chr16	16665318	16665614	AluSz	-	SINE/Alu	AluSz	2.05192	15.2999	-7.45637	5.07356e-05	Yes	177508	ENSG00000214967	NPIPA7
chr21	15234189	15236197	MSTA|MSTA-int|MSTA|MSTA|MSTA-int|MSTA-int	-	LTR/ERVL-MaLR	MSTA-int	3.0949	0.427513	7.2393	5.07356e-05	Yes	-180731	ENSG00000269011	AL050303.1
chr9	109615801	109615928	MIR3	+	SINE/MIR	MIR3	0.736496	6.45392	-8.76301	5.07356e-05	Yes	-9451	ENSG00000148143	ZNF462
chr12	121104304	121104576	L2b	-	LINE/L2	L2b	4.80148	0.487883	9.84146	5.10537e-05	Yes	0	ENSG00000157782	CABP1
chr3	58403580	58403846	AluJb	-	SINE/Alu	AluJb	7.62969	0.611094	12.4853	5.11058e-05	Yes	0	ENSG00000168297	PXK
chr3	39563800	39563932	L2a	+	LINE/L2	L2a	6.30115	0.467985	13.4644	5.1243e-05	Yes	0	ENSG00000168314	MOBP
chr5	146356947	146358431	L1PA7	-	LINE/L1	L1PA7	4.0491	0.426464	9.49459	5.13339e-05	Yes	0	ENSG00000156475	PPP2R2B
chr15	65334740	65334927	L2c	+	LINE/L2	L2c	15.8759	1.47277	10.7796	5.13557e-05	Yes	-2782	ENSG00000186198	SLC51B
chr3	20122163	20122470	MER33	+	DNA/hAT-Charlie	MER33	4.42185	0.560095	7.89482	5.13557e-05	Yes	0	ENSG00000114166	KAT2B
chr1	248865741	248866133	L2	+	LINE/L2	L2	2.19026	0.427068	5.1286	5.1541e-05	Yes	-20113	ENSG00000189181	OR14I1
chr19	20331250	20332477	LTR70	-	LTR/ERV1	LTR70	11.6294	53.0386	-4.56073	5.1541e-05	Yes	19952	ENSG00000256229	ZNF486
chr15	25395904	25401178	L1MC3	+	LINE/L1	L1MC3	9.54629	0.775863	12.3041	5.16072e-05	Yes	150482	ENSG00000214265	SNURF
chr21	15241349	15242884	MSTA-int	-	LTR/ERVL-MaLR	MSTA-int	4.35239	0.507905	8.5693	5.19652e-05	Yes	-187891	ENSG00000269011	AL050303.1
chr14	92965867	92966162	AluJr	-	SINE/Alu	AluJr	9.1204	0.751847	12.1307	5.23335e-05	Yes	3272	ENSG00000140090	SLC24A4
chr5	125828132	125828427	AluJb	+	SINE/Alu	AluJb	8.88372	0.590614	15.0415	5.25044e-05	Yes	0	ENSG00000155324	GRAMD3
chr19	53858176	53858464	AluSq2	-	SINE/Alu	AluSq2	2.12744	14.898	-7.00277	5.25149e-05	Yes	55	ENSG00000213799	ZNF845
chr10	75119213	75120271	L1MC4	+	LINE/L1	L1MC4	28.159	3.62822	7.76111	5.25565e-05	Yes	-597	ENSG00000156042	TTC18
chr2	132578777	132578964	THE1C	-	LTR/ERVL-MaLR	THE1C	2.9949	0.427116	7.01191	5.26744e-05	Yes	-19544	ENSG00000186825	C2orf27B
chr1	230936415	230936564	MER5B	+	DNA/hAT-Charlie	MER5B	4.55226	0.511742	8.89562	5.27579e-05	Yes	0	ENSG00000135773	CAPN9
chr15	85181288	85181392	MIRb	+	SINE/MIR	MIRb	1.33915	10.4356	-7.7927	5.27671e-05	Yes	4608	ENSG00000177082	WDR73
chr9	19569500	19570156	L2b	+	LINE/L2	L2b	4.53695	0.55986	8.10372	5.27671e-05	Yes	0	ENSG00000155886	SLC24A2
chr21	15257501	15259177	MSTA|MSTA-int	-	LTR/ERVL-MaLR	MSTA-int	3.56693	0.427774	8.33834	5.2891e-05	Yes	-204043	ENSG00000269011	AL050303.1
chr1	220755686	220755861	MER91A	-	DNA/hAT-Tip100	MER91A	8.00627	38.0117	-4.74774	5.29259e-05	Yes	0	ENSG00000116141	MARK1
chr7	26501257	26501754	L1MB3	-	LINE/L1	L1MB3	0.630547	5.40049	-8.56478	5.31844e-05	Yes	70987	ENSG00000122548	KIAA0087
chr5	43059214	43060683	L1PA6	+	LINE/L1	L1PA6	10.5031	0.862928	12.1715	5.32316e-05	Yes	-4596	ENSG00000172262	ZNF131
chr8	11873076	11873518	L2c	-	LINE/L2	L2c	8.00243	0.679163	11.7828	5.32515e-05	Yes	-34	ENSG00000255098	RP11-481A20.11
chr4	86924920	86925117	L2c	+	LINE/L2	L2c	11.9529	1.13919	10.4925	5.33487e-05	Yes	1098	ENSG00000138639	ARHGAP24
chr9	87618408	87618854	L2a	-	LINE/L2	L2a	9.43933	0.752957	12.5363	5.33487e-05	Yes	0	ENSG00000148053	NTRK2
chr20	1873208	1873364	L2b	+	LINE/L2	L2b	3.97277	0.510188	7.78688	5.35584e-05	Yes	-1791	ENSG00000198053	SIRPA
chr5	128371028	128372447	L1PA7	+	LINE/L1	L1PA7	11.345	1.16598	9.72998	5.35584e-05	Yes	1694	ENSG00000113396	SLC27A6
chr1	160056637	160057020	L3	+	LINE/CR1	L3	15.1255	1.21285	12.471	5.36908e-05	Yes	0	ENSG00000162728	KCNJ9
chr10	91094212	91094547	AluSq4	-	SINE/Alu	AluSq4	33.4087	3.98073	8.3926	5.37597e-05	Yes	0	ENSG00000107798	LIPA
chr20	3164650	3164863	MER112	+	DNA/hAT-Charlie	MER112	42.5757	8.48301	5.01894	5.39573e-05	Yes	6134	ENSG00000198171	DDRGK1
chr1	226031761	226031882	MIRb	+	SINE/MIR	MIRb	13.6478	0.892839	15.2859	5.40825e-05	Yes	0	ENSG00000143819	EPHX1
chr7	154742150	154742840	L1MC1	+	LINE/L1	L1MC1	19.5569	3.31798	5.89424	5.41793e-05	Yes	0	ENSG00000157212	PAXIP1
chr1	110137269	110137557	AluY	-	SINE/Alu	AluY	9.94311	43.695	-4.39449	5.42276e-05	Yes	295	ENSG00000065135	GNAI3
chr14	36606086	36607311	L2a	-	LINE/L2	L2a	7.03623	0.586158	12.004	5.42276e-05	Yes	160460	ENSG00000151332	MBIP
chr10	88802506	88802763	AluJb	+	SINE/Alu	AluJb	14.3077	1.07816	13.2705	5.42528e-05	Yes	7481	ENSG00000148672	GLUD1
chr4	154557996	154558235	AluSx	-	SINE/Alu	AluSx	1.59655	11.2009	-7.01571	5.42528e-05	Yes	134	ENSG00000121210	KIAA0922
chr3	64165052	64165363	Tigger17a	-	DNA/TcMar-Tigger	Tigger17a	5.22312	0.555485	9.40279	5.43449e-05	Yes	0	ENSG00000163637	PRICKLE2
chr3	63810543	63810856	L1MC2	-	LINE/L1	L1MC2	7.61857	0.78339	9.72512	5.50453e-05	Yes	0	ENSG00000163632	C3orf49
chr21	33821377	33821898	L1MC1	-	LINE/L1	L1MC1	3.74926	0.467152	8.02577	5.51661e-05	Yes	0	ENSG00000166979	EVA1C
chr11	83396331	83397628	L2a	+	LINE/L2	L2a	4.70003	0.508564	9.24177	5.52503e-05	Yes	0	ENSG00000150672	DLG2
chr10	35690533	35695102	LTR7B|HERVH-int|HERVH-int|HERVH-int	-	LTR/ERV1	HERVH-int	28.1518	2.94488	9.5596	5.53354e-05	Yes	0	ENSG00000108100	CCNY
chr11	132161109	132163491	L2	-	LINE/L2	L2	9.547	0.673518	14.1748	5.53498e-05	Yes	0	ENSG00000182667	NTM
chr7	78612968	78614259	L2a	+	LINE/L2	L2a	5.64575	0.584243	9.66336	5.57448e-05	Yes	0	ENSG00000187391	MAGI2
chr19	1324382	1324545	L2b	-	LINE/L2	L2b	30.9378	4.40222	7.02776	5.57833e-05	Yes	0	ENSG00000160953	MUM1
chr5	177381821	177382568	L1ME3A	+	LINE/L1	L1ME3A	6.41009	0.734812	8.72345	5.57833e-05	Yes	36669	ENSG00000175325	PROP1
chr2	2827471	2827875	L1PREC2	-	LINE/L1	L1PREC2	3.2303	0.468252	6.89863	5.59182e-05	Yes	364822	ENSG00000032389	TSSC1
chr20	10267712	10268820	L1PA3	+	LINE/L1	L1PA3	4.56259	0.601086	7.59057	5.59182e-05	Yes	0	ENSG00000132639	SNAP25
chr1	211127242	211133387	L1PA6	-	LINE/L1	L1PA6	3.14053	0.513386	6.11728	5.61196e-05	Yes	0	ENSG00000143473	KCNH1
chr3	117299219	117300614	L2	+	LINE/L2	L2	13.0894	1.11524	11.7368	5.63029e-05	Yes	0	ENSG00000185565	LSAMP
chr18	22084056	22084359	AluY	-	SINE/Alu	AluY	1.94909	0.427714	4.55701	5.64181e-05	Yes	24136	ENSG00000134489	HRH4
chr4	35860552	35866631	LTR12F|HERV9-int|HERV9-int|LTR12F	-	LTR/ERV1	HERV9-int	5.03514	0.548858	9.17385	5.66612e-05	Yes	83213	ENSG00000047365	ARAP2
chr11	45887432	45888136	L2c	-	LINE/L2	L2c	5.75556	0.589542	9.76277	5.67534e-05	Yes	0	ENSG00000121671	CRY2
chr2	77307919	77308370	L2a	+	LINE/L2	L2a	2.29829	0.427995	5.36991	5.67534e-05	Yes	0	ENSG00000176204	LRRTM4
chr17	72853861	72854177	MER33	+	DNA/hAT-Charlie	MER33	2.19759	0.42758	5.13961	5.69145e-05	Yes	0	ENSG00000161509	GRIN2C
chr1	77895555	77896553	L2a	-	LINE/L2	L2a	7.04528	0.631869	11.1499	5.69171e-05	Yes	0	ENSG00000154027	AK5
chr10	43140507	43150417	HERV1_LTRa|HERV1_I-int|HERV1_I-int|HERV1_LTRa	+	LTR/ERV1	HERV1_I-int	26.2129	3.65855	7.16482	5.69318e-05	Yes	-6516	ENSG00000196693	ZNF33B
chr5	63910204	63910461	L1ME4a	+	LINE/L1	L1ME4a	42.357	3.09336	13.6929	5.69636e-05	Yes	2066	ENSG00000186479	RGS7BP
chr3	42824830	42825110	AluSz6	+	SINE/Alu	AluSz6	79.6863	21.7904	3.65694	5.71093e-05	Yes	0	ENSG00000181061	HIGD1A
chr14	103424161	103424705	L1MC4	+	LINE/L1	L1MC4	8.65585	0.751942	11.5113	5.72158e-05	Yes	0	ENSG00000198752	CDC42BPB
chr17	80652478	80653051	HAL1b	+	LINE/L1	HAL1b	13.2305	1.56162	8.47227	5.74395e-05	Yes	0	ENSG00000141542	RAB40B
chr2	166844831	166845298	LTR33	-	LTR/ERVL	LTR33	10.0236	0.649454	15.4339	5.74395e-05	Yes	373	ENSG00000144285	SCN1A
chr11	126792115	126792610	L2b	+	LINE/L2	L2b	12.7186	1.07896	11.7879	5.74527e-05	Yes	0	ENSG00000149571	KIRREL3
chr8	53217783	53219011	L2a	+	LINE/L2	L2a	2.94037	0.427447	6.87891	5.74597e-05	Yes	0	ENSG00000147488	ST18
chr2	74321126	74322148	L2a	-	LINE/L2	L2a	7.67014	0.885157	8.66528	5.75463e-05	Yes	0	ENSG00000187605	TET3
chr3	128678661	128684243	LTR7Y|HERVH-int|HERVH-int|HERVH-int|HERVH-int|HERVH-int|HERVH-int|LTR7Y	+	LTR/ERV1	HERVH-int	10.2842	0.91189	11.2778	5.79774e-05	Yes	0	ENSG00000114656	KIAA1257
chr1	247199334	247199624	L1M4	+	LINE/L1	L1M4	3.29258	18.8496	-5.72486	5.83953e-05	Yes	0	ENSG00000135747	ZNF670
chr1	67865442	67865906	MER41B	+	LTR/ERV1	MER41B	24.6486	1.32834	18.5559	5.84374e-05	Yes	2860	ENSG00000081985	IL12RB2
chr11	116816275	116816775	L2	+	LINE/L2	L2	3.7094	0.468315	7.92073	5.85868e-05	Yes	0	ENSG00000160584	SIK3
chr6	167235062	167235632	L2a	+	LINE/L2	L2a	2.1148	0.428287	4.93781	5.87383e-05	Yes	0	ENSG00000071242	RPS6KA2
chr16	56234901	56235846	L2c	-	LINE/L2	L2c	7.43089	0.777843	9.5532	5.87685e-05	Yes	0	ENSG00000087258	GNAO1
chr2	39724971	39725844	L1PA5	+	LINE/L1	L1PA5	31.6863	5.46946	5.7933	5.89023e-05	Yes	-60519	ENSG00000011566	MAP4K3
chr4	89323657	89324100	L2a	-	LINE/L2	L2a	3.32094	0.512893	6.47491	5.89023e-05	Yes	0	ENSG00000138642	HERC6
chr9	99902931	99905334	MSTA-int|MSTA|MSTA-int|MSTA|MSTA|MSTA-int	-	LTR/ERVL-MaLR	MSTA-int	10.1528	1.03164	9.84147	5.89268e-05	Yes	-95432	ENSG00000197816	CCDC180
chr2	242810980	242811378	L1ME3B	+	LINE/L1	L1ME3B	6.58404	0.600631	10.9619	5.90422e-05	Yes	-375	ENSG00000188011	CXXC11
chr19	8276820	8276964	L2b	-	LINE/L2	L2b	3.41524	0.47005	7.26569	5.95039e-05	Yes	0	ENSG00000090661	CERS4
chr19	36826643	36826936	AluSx1	-	SINE/Alu	AluSx1	10.9507	43.518	-3.97399	6.06224e-05	Yes	227	ENSG00000142065	ZFP14
chr14	101050020	101050335	AluSx	-	SINE/Alu	AluSx	4.69522	0.558855	8.4015	6.07011e-05	Yes	0	ENSG00000183092	BEGAIN
chr15	54923563	54925082	L1ME1	-	LINE/L1	L1ME1	5.00853	0.587801	8.52078	6.09417e-05	Yes	2758	ENSG00000137766	UNC13C
chr1	17196506	17196857	THE1A	+	LTR/ERVL-MaLR	THE1A	1.96174	15.2521	-7.77477	6.11246e-05	Yes	0	ENSG00000058453	CROCC
chr20	31999087	31999897	L2c	+	LINE/L2	L2c	34.4347	4.7197	7.29595	6.12588e-05	Yes	0	ENSG00000101400	SNTA1
chr10	5591525	5591945	MER57C2	-	LTR/ERV1	MER57C2	4.40224	0.469005	9.38635	6.13254e-05	Yes	23301	ENSG00000178363	CALML3
chr10	88802272	88802505	L1M4	-	LINE/L1	L1M4	13.1744	1.14694	11.4865	6.13882e-05	Yes	7739	ENSG00000148672	GLUD1
chr8	38608985	38609142	Tigger1	+	DNA/TcMar-Tigger	Tigger1	2.94002	0.513339	5.72724	6.14963e-05	Yes	0	ENSG00000147526	TACC1
chr3	58408386	58408492	MamSINE1	+	SINE/tRNA-RTE	MamSINE1	16.0686	1.13746	14.1268	6.15191e-05	Yes	0	ENSG00000168297	PXK
chr10	88805781	88806203	L1M4	-	LINE/L1	L1M4	17.323	1.65446	10.4705	6.20824e-05	Yes	4041	ENSG00000148672	GLUD1
chr8	42762887	42764624	L1MA7	+	LINE/L1	L1MA7	5.731	28.9098	-5.04446	6.20824e-05	Yes	0	ENSG00000168172	HOOK3
chr1	78489993	78490269	AluJo	-	SINE/Alu	AluJo	35.3831	4.54516	7.7848	6.23561e-05	Yes	0	ENSG00000137960	GIPC2
chr19	56148620	56148927	AluSz	+	SINE/Alu	AluSz	18.2321	1.8318	9.95311	6.23561e-05	Yes	0	ENSG00000213015	ZNF580
chr3	76583843	76587297	HERVH-int|HERVH-int|LTR7C	-	LTR/ERV1	HERVH-int	14.545	1.00589	14.4599	6.25654e-05	Yes	0	ENSG00000185008	ROBO2
chr15	72616605	72617448	L1MDa	-	LINE/L1	L1MDa	26.5094	2.53826	10.4439	6.2701e-05	Yes	-4136	ENSG00000140488	CELF6
chr17	46025721	46025897	MER5B	-	DNA/hAT-Charlie	MER5B	51.0112	12.1622	4.19425	6.27113e-05	Yes	68	ENSG00000108439	PNPO
chr9	130991907	130992204	AluSx1	+	SINE/Alu	AluSx1	7.99355	0.866972	9.22008	6.27113e-05	Yes	0	ENSG00000106976	DNM1
chr10	118580001	118580878	L2c	+	LINE/L2	L2c	3.97637	0.532705	7.4645	6.29256e-05	Yes	-28146	ENSG00000188316	ENO4
chr18	72256152	72256341	MamTip2b	-	DNA/hAT-Tip100	MamTip2b	7.5247	0.605512	12.427	6.33877e-05	Yes	1705	ENSG00000150656	CNDP1
chr9	114312941	114313295	HAL1	-	LINE/L1	HAL1	56.1305	10.4614	5.36551	6.34068e-05	Yes	0	ENSG00000173258	ZNF483
chr20	58199806	58200163	L1MC3	-	LINE/L1	L1MC3	7.8494	0.688096	11.4074	6.34789e-05	Yes	0	ENSG00000087495	PHACTR3
chr7	99766646	99766945	AluSq2	+	SINE/Alu	AluSq2	1.14741	9.77841	-8.52213	6.34789e-05	Yes	-274	ENSG00000197093	GAL3ST4
chr11	116764720	116765248	L2a	+	LINE/L2	L2a	4.34983	0.560528	7.76024	6.36665e-05	Yes	0	ENSG00000160584	SIK3
chr7	84988981	84991262	THE1C|THE1C-int|THE1C	+	LTR/ERVL-MaLR	THE1C-int	2.09002	0.427657	4.88714	6.41639e-05	Yes	-172811	ENSG00000153993	SEMA3D
chr3	117196743	117197442	L2c	+	LINE/L2	L2c	4.04214	0.466027	8.67363	6.44088e-05	Yes	0	ENSG00000185565	LSAMP
chr5	26868632	26868973	MER47B	-	DNA/TcMar-Tigger	MER47B	15.0118	1.21081	12.3981	6.44088e-05	Yes	11737	ENSG00000113100	CDH9
chr14	77497561	77497713	MamRep488	+	DNA/hAT-Tip100	MamRep488	18.898	2.71663	6.95642	6.45301e-05	Yes	-2528	ENSG00000119669	IRF2BPL
chr10	1227207	1227550	L4_C_Mam	+	LINE/RTE-X	L4_C_Mam	34.9641	5.17653	6.75435	6.46553e-05	Yes	524	ENSG00000185736	ADARB2
chr12	7305248	7305489	MIR	-	SINE/MIR	MIR	3.45753	0.560375	6.17003	6.49531e-05	Yes	0	ENSG00000139182	CLSTN3
chr12	42850695	42851005	AluSq2	+	SINE/Alu	AluSq2	16.1978	2.9541	5.48317	6.49531e-05	Yes	0	ENSG00000134283	PPHLN1
chrX	103016087	103017827	LTR7|HERVH-int|HERVH-int|HERVH-int	-	LTR/ERV1	HERVH-int	11.2606	1.24071	9.07593	6.49531e-05	Yes	-10821	ENSG00000123560	PLP1
chr11	61311433	61311654	MER58A	+	DNA/hAT-Charlie	MER58A	3.13533	0.468014	6.69922	6.51478e-05	Yes	0	ENSG00000011347	SYT7
chr14	105548918	105549074	L1ME2z	-	LINE/L1	L1ME2z	2.24144	0.469384	4.77528	6.52487e-05	Yes	-17137	ENSG00000183484	GPR132
chr7	63543278	63544295	L1PREC2	-	LINE/L1	L1PREC2	45.4201	3.68535	12.3245	6.53219e-05	Yes	4352	ENSG00000257482	ZNF727
chr15	31805458	31806073	L1MC4	-	LINE/L1	L1MC4	4.54741	0.465835	9.76184	6.54239e-05	Yes	0	ENSG00000169918	OTUD7A
chr1	39992523	39992643	MER117	-	DNA/hAT-Charlie	MER117	13.2373	0.786987	16.8203	6.54743e-05	Yes	917	ENSG00000183682	BMP8A
chr14	68031035	68031174	L1MC5	+	LINE/L1	L1MC5	8.51232	0.702669	12.1143	6.54985e-05	Yes	0	ENSG00000054690	PLEKHH1
chr6	90068190	90068762	Kanga2_a	+	DNA/TcMar-Tc2	Kanga2_a	37.8631	8.12618	4.65939	6.56409e-05	Yes	5594	ENSG00000025039	RRAGD
chr1	78484421	78484723	AluJr	+	SINE/Alu	AluJr	14.2123	2.13606	6.65353	6.57034e-05	Yes	0	ENSG00000137960	GIPC2
chr4	109548114	109548405	AluSc8	+	SINE/Alu	AluSc8	6.50565	31.0087	-4.76643	6.57034e-05	Yes	0	ENSG00000109475	RPL34
chr3	76845660	76847760	L1MA3	+	LINE/L1	L1MA3	31.909	1.4648	21.7838	6.57797e-05	Yes	0	ENSG00000185008	ROBO2
chr19	40694453	40695023	Tigger9a	+	DNA/TcMar-Tigger	Tigger9a	11.9042	1.067	11.1567	6.57894e-05	Yes	-2629	ENSG00000130758	MAP3K10
chr2	115523800	115524683	L1MD2	+	LINE/L1	L1MD2	6.55949	0.49868	13.1537	6.58957e-05	Yes	0	ENSG00000175497	DPP10
chr10	18587849	18588009	L1PA2	+	LINE/L1	L1PA2	6.82935	0.578961	11.7959	6.59996e-05	Yes	0	ENSG00000165995	CACNB2
chr10	1256307	1256372	L3	+	LINE/CR1	L3	11.6971	0.786932	14.8642	6.62956e-05	Yes	0	ENSG00000185736	ADARB2
chr2	39828359	39828689	AluYk3	+	SINE/Alu	AluYk3	10.1911	0.878262	11.6037	6.63521e-05	Yes	-63434	ENSG00000152154	TMEM178A
chr1	237296230	237296636	L2	-	LINE/L2	L2	3.33427	0.468946	7.11013	6.66139e-05	Yes	0	ENSG00000198626	RYR2
chr8	19406616	19407667	HAL1	-	LINE/L1	HAL1	3.61368	0.512612	7.04954	6.68479e-05	Yes	0	ENSG00000147408	CSGALNACT1
chr1	233780094	233780658	L2a	-	LINE/L2	L2a	2.23195	0.427406	5.22208	6.71539e-05	Yes	0	ENSG00000135750	KCNK1
chr12	99492607	99493310	MER45C	+	DNA/hAT-Tip100	MER45C	3.25925	0.559666	5.82356	6.71539e-05	Yes	0	ENSG00000185046	ANKS1B
chr7	64352884	64353590	LTR9A1	-	LTR/ERV1	LTR9A1	19.5892	1.424	13.7565	6.71641e-05	Yes	0	ENSG00000198039	ZNF273
chr14	59912083	59916503	HERVH-int|HERVH-int|HERVH-int|HERVH-int|HERVH-int|HERVH-int|HERVH-int|LTR7	+	LTR/ERV1	HERVH-int	14.0939	1.51744	9.2879	6.73071e-05	Yes	0	ENSG00000181619	GPR135
chr8	99445668	99445852	MIR3	+	SINE/MIR	MIR3	8.13135	0.801516	10.145	6.74818e-05	Yes	0	ENSG00000104375	STK3
chr3	197261736	197262076	MLT1A0	-	LTR/ERVL-MaLR	MLT1A0	7.88056	0.824179	9.56171	6.76673e-05	Yes	0	ENSG00000161267	BDH1
chr17	79352182	79352472	AluSx1	-	SINE/Alu	AluSx1	6.35872	0.556181	11.4328	6.7949e-05	Yes	-16804	ENSG00000263053	RP11-1055B8.6
chr6	97069992	97070761	L1MB7	+	LINE/L1	L1MB7	5.83726	0.53346	10.9423	6.7949e-05	Yes	5481	ENSG00000112214	FHL5
chr2	95430648	95432924	MSTA|MSTA-int|MSTA|MSTA|MSTA-int|MSTA-int	-	LTR/ERVL-MaLR	MSTA-int	3.20185	0.427955	7.48173	6.82516e-05	Yes	-104255	ENSG00000163060	TEKT4
chr9	38562354	38564717	MSTA-int|MSTA|MSTA-int|MSTA|MSTA|MSTA-int	-	LTR/ERVL-MaLR	MSTA-int	23.1175	1.08804	21.2469	6.82592e-05	Yes	0	ENSG00000273170	ANKRD18A
chr13	19815794	19817578	L1PBa	+	LINE/L1	L1PBa	6.08927	0.428171	14.2216	6.88294e-05	Yes	54299	ENSG00000121388	RP11-408E5.4
chrX	101762380	101763638	L1M4	+	LINE/L1	L1M4	0.541615	4.34473	-8.0218	6.89129e-05	Yes	4967	ENSG00000158164	TMSB15A
chr8	4087047	4087452	L2a	+	LINE/L2	L2a	4.61963	0.530585	8.70667	6.90588e-05	Yes	0	ENSG00000183117	CSMD1
chr2	207347907	207348961	L2c	-	LINE/L2	L2c	4.96318	0.589565	8.41838	6.93958e-05	Yes	0	ENSG00000114948	ADAM23
chr7	198457	198681	MER46C	+	DNA/TcMar-Tigger	MER46C	0.727793	7.28159	-10.005	6.93958e-05	Yes	0	ENSG00000177706	FAM20C
chr7	130740412	130741069	L2	+	LINE/L2	L2	5.28207	0.508491	10.3877	6.9432e-05	Yes	-53787	ENSG00000128585	MKLN1
chr20	25050236	25050549	LTR16E2	-	LTR/ERVL	LTR16E2	2.04149	0.42737	4.77687	6.95233e-05	Yes	973	ENSG00000100987	VSX1
chr17	42984804	42984969	MIRb	+	SINE/MIR	MIRb	13.1305	0.870956	15.0759	6.97667e-05	Yes	0	ENSG00000131095	GFAP
chr4	17487181	17487419	L1MB5	+	LINE/L1	L1MB5	30.6275	5.15585	5.94033	7.00103e-05	Yes	0	ENSG00000151552	QDPR
chr2	25496529	25497197	L2b	+	LINE/L2	L2b	4.85176	0.59951	8.09287	7.01119e-05	Yes	0	ENSG00000119772	DNMT3A
chr5	654835	655194	L1MEf	-	LINE/L1	L1MEf	21.1231	1.77788	11.881	7.0168e-05	Yes	0	ENSG00000112877	CEP72
chr18	40317011	40322310	LTR7|HERVH-int|HERVH-int|HERVH-int|HERVH-int|HERVH-int|HERVH-int|HERVH-int|LTR7	+	LTR/ERV1	HERVH-int	14.6708	1.40922	10.4106	7.02769e-05	Yes	883	ENSG00000152214	RIT2
chr5	34640792	34646945	L1PA6	-	LINE/L1	L1PA6	0.624842	7.03136	-11.253	7.02769e-05	Yes	-9398	ENSG00000039560	RAI14
chr6	124694070	124695501	L2	-	LINE/L2	L2	4.91474	0.575449	8.5407	7.03866e-05	Yes	0	ENSG00000188580	NKAIN2
chr15	31696525	31697047	LTR12F	+	LTR/ERV1	LTR12F	5.0145	0.644677	7.77831	7.10291e-05	Yes	0	ENSG00000169926	KLF13
chr9	124061614	124061704	MIR	+	SINE/MIR	MIR	6.46404	0.560563	11.5313	7.15569e-05	Yes	0	ENSG00000148180	GSN
chr11	40866706	40873141	L1PA7	-	LINE/L1	L1PA7	2.61028	0.428316	6.0943	7.16387e-05	Yes	0	ENSG00000148948	LRRC4C
chr17	72730701	72731011	AluSx1	+	SINE/Alu	AluSx1	2.02331	0.427795	4.72963	7.17368e-05	Yes	0	ENSG00000172794	RAB37
chr9	19518394	19518713	AluSc	-	SINE/Alu	AluSc	5.55576	0.61367	9.05333	7.17492e-05	Yes	0	ENSG00000155886	SLC24A2
chr14	29264692	29264988	AluJb	+	SINE/Alu	AluJb	11.1623	65.0811	-5.83043	7.19545e-05	Yes	0	ENSG00000186960	C14orf23
chr17	36664293	36665351	L2c	-	LINE/L2	L2c	19.8221	1.34777	14.7074	7.21572e-05	Yes	0	ENSG00000225485	ARHGAP23
chr15	43176957	43182546	LTR7B|HERVH-int|HERVH-int|HERVH-int|HERVH-int|LTR7B	+	LTR/ERV1	HERVH-int	11.8241	1.49049	7.93304	7.26657e-05	Yes	0	ENSG00000128881	TTBK2
chr19	47969872	47970042	L1ME3	+	LINE/L1	L1ME3	3.42403	0.428013	7.99981	7.26717e-05	Yes	0	ENSG00000118160	SLC8A2
chr19	35800044	35800365	LTR42	-	LTR/ERVL	LTR42	4.26931	0.427732	9.98126	7.29391e-05	Yes	0	ENSG00000105695	MAG
chr9	33582566	33584807	MSTA-int|MSTA|MSTA|MSTA-int|MSTA	+	LTR/ERVL-MaLR	MSTA-int	6.84872	0.559989	12.2301	7.30275e-05	Yes	9560	ENSG00000230453	ANKRD18B
chr8	143585970	143586139	L2b	-	LINE/L2	L2b	4.28229	0.533518	8.02652	7.3093e-05	Yes	0	ENSG00000181790	BAI1
chr3	23378822	23379504	L2c	-	LINE/L2	L2c	4.00294	0.554094	7.22431	7.31579e-05	Yes	0	ENSG00000182247	UBE2E2
chr4	122676426	122677862	L1MC2	+	LINE/L1	L1MC2	5.0712	0.534646	9.48515	7.32804e-05	Yes	2227	ENSG00000164112	TMEM155
[truncated: 19,714 more rows]

## Sheet: cpm_Inferior_temporal_cortex.
chr	start	end	repName	strand	class.fam	unMerged	mean.A	mean.EP	foldChange	padj	diffExpr	dist2gene	gene.ens	gene.name
[truncated: 21,092 more rows]

[truncated: 11 more sheets: cpm_Medial_prefrontal_cortex., cpm_Mediodorsal_nucleus_of_th, cpm_Orbital_prefrontal_cortex, cpm_Posterior_inferior_pariet, cpm_Primary_auditory_(A1)_cor, cpm_Primary_motor_(M1)_cortex, cpm_Primary_somatosensory_(S1, cpm_Primary_visual_(V1)_corte, cpm_Striatum.xls, cpm_Superior_temporal_cortex., cpm_Ventrolateral_prefrontal_]
