# Supplementary material for: Transposable elements and their KZFP controllers are drivers of transcriptional innovation in the developing human brain
Source: HighWire-hosted journal article supplement (doi:10.1101/gr.275133.120), 2021-08-16
Supplement: Supplemental_Table_S9.xlsx [file Supplemental_Table_S9.xlsx]

## Sheet: Legend
Supplemental Table S9 – Oligonucleotide information

## Sheet: Oligo_information
Oligo List
Name	Sequence	Usage
L2:DDRGK1_cloningF	CACCATGAGACCTGAAGGTTGTA	Cloning L2:DDRGK1 transcript
L2:DDRGK1_cloningR	GGCTGGGGCTTGGGCAGGGGACT	Cloning L2:DDRGK1 transcript
L2:DDRGK1_RTPCR_F	AAGCCAAGGGAGGAAAGAAG	RTPCR
L2:DDRGK1_RTPCR_R	GTCAGGAAGCTCTGGGACTG	RTPCR
L2a:KCNAB2_RTPCR_F	CCTTGGCATAAAGAGGCAAA	RTPCR
L2a:KCNAB2_RTPCR_R	ATACATGGAGCCAGCCTCAC	RTPCR
L2:DYSF_RTPCR_F	ATCAGGAAACCCCAGGAGTC	RTPCR
L2:DYSF_RTPCR_R	CTCTGGTGCAGGAAGGAGAC	RTPCR
MIR3:FKBP8_RTPCR_F	AGGCCCTCAGGTTCACTTCT	RTPCR
MIR3:FKBP8_RTPCR_R	TCAACCCCATCCAGTACCTC	RTPCR
AluJo:TMEM160_RTPCR_F	CAGAGAATCCTCCTGCCTTG	RTPCR
AluJo:TMEM160_RTPCR_R	CATATGCTGCTTCCCGACCC	RTPCR
LTR12D:GALNT13_RTPCR_F	GGCTTGATCTGAGGCTGAAT	RTPCR
LTR12D:GALNT13_RTPCR_R	AAGCCACACAGGTGAACTCC	RTPCR
L2:PUM2_RTPCR_F	GTAAAAATCTGCGAGGCTTG	RTPCR
L2:PUM2_RTPCR_R	CTCCCCATGCAGTCTCTCTC	RTPCR
ACTB_RTPCR_F	CATGTACGTTGCTATCCAGGC	RTPCR
ACTB_RTPCR_F	CTCCTTAATGTCACGCACGAT	RTPCR	mitSpecScore	cfdSpecScore	offtargetCount	targetGenomeGeneLocus	Doench '16-Score	Moreno-Mateos-Score	Out-of-Frame-Score	Lindel-Score	GrafEtAlStatus	Link to CRISPOR
KCNAB2_gRNA_2	TTTCTTGGCTTTATATATCTTGTGGAAAGGACGAAACACCGACAGCATAAGCGAGACGAGT	CRISPRa	96	97	40	intron:KCNAB2	58	47	48	66	GrafOK	http://crispor.org/crispor.py?batchId=9Uv84vgMP8KJDNvPziyW
KCNAB2_gRNA_2	GACTAGCCTTATTTTAACTTGCTATTTCTAGCTCTAAAACACTCGTCTCGCTTATGCTGTC	CRISPRa	96	97	40	intron:KCNAB2	58	47	48	66	GrafOK
KCNAB2_gRNA_1	TTTCTTGGCTTTATATATCTTGTGGAAAGGACGAAACACCGGATGCCGGCTCCGGGAAAGC	CRISPRa	81	90	108	intron:KCNAB2	43	44	56	64	GrafOK
KCNAB2_gRNA_1	GACTAGCCTTATTTTAACTTGCTATTTCTAGCTCTAAAACGCTTTCCCGGAGCCGGCATCC	CRISPRa	81	90	108	intron:KCNAB2	43	44	56	64	GrafOK
DYSF_gRNA_2	TTTCTTGGCTTTATATATCTTGTGGAAAGGACGAAACACCGTGGTCACCGTCTGGACCATC	CRISPRa	88	92	81	exon:DYSF	39	55	57	56	GrafOK	http://crispor.org/crispor.py?batchId=yWifK7OsDa9it5ZmweMs
DYSF_gRNA_2	GACTAGCCTTATTTTAACTTGCTATTTCTAGCTCTAAAACGATGGTCCAGACGGTGACCAC	CRISPRa	88	92	81	exon:DYSF	39	55	57	56	GrafOK
DYSF_gRNA_1	TTTCTTGGCTTTATATATCTTGTGGAAAGGACGAAACACCGATTGACAGTGCCACCAGATT	CRISPRa	83	92	96	intron:DYSF	37	54	55	75	GrafOK
DYSF_gRNA_1	GACTAGCCTTATTTTAACTTGCTATTTCTAGCTCTAAAACAATCTGGTGGCACTGTCAATC	CRISPRa	83	92	96	intron:DYSF	37	54	55	75	GrafOK
DDRGK1_gRNA_1	TTTCTTGGCTTTATATATCTTGTGGAAAGGACGAAACACCGTGATGCTTTGGGCATGGGCG	CRISPRa	74	85	164	intron:DDRGK1	38	48	66	69	GrafOK	http://crispor.org/crispor.py?batchId=7AHPcpqtdtqVTBB5H4xw
DDRGK1_gRNA_1	GACTAGCCTTATTTTAACTTGCTATTTCTAGCTCTAAAACCGCCCATGCCCAAAGCATCAC	CRISPRa	74	85	164	intron:DDRGK1	38	48	66	69	GrafOK
DDRGK1_gRNA_2	TTTCTTGGCTTTATATATCTTGTGGAAAGGACGAAACACCGGCTACAAGTGTGGTAGTCAC	CRISPRa	85	94	70	intron:DDRGK1	52	54	55	79	GrafOK
DDRGK1_gRNA_2	GACTAGCCTTATTTTAACTTGCTATTTCTAGCTCTAAAACGTGACTACCACACTTGTAGCC	CRISPRa	85	94	70	intron:DDRGK1	52	54	55	79	GrafOK
DDRGK1_gRNA_3	TTTCTTGGCTTTATATATCTTGTGGAAAGGACGAAACACCGGGCCCAGTAGCTGTGTCACA	CRISPRa	64	84	165	intron:DDRGK1	61	31	62	70	GrafOK
DDRGK1_gRNA_3	GACTAGCCTTATTTTAACTTGCTATTTCTAGCTCTAAAACTGTGACACAGCTACTGGGCCC	CRISPRa	64	84	165	intron:DDRGK1	61	31	62	70	GrafOK
